# Supplementary material for: Social Responsiveness, an Autism Endophenotype: Genomewide Significant Linkage to Two Regions on Chromosome 8
Source: Atypon-hosted journal article supplement (doi:10.1176/appi.ajp.2014.14050576), 2014-12-17
Supplement: appi.ajp.2014.14050576.ds001.st3.pdf [file appi.ajp.2014.14050576.ds001.st3.pdf]

Table ST3. Genome-wide multi-point LOD scores for social responsiveness as a quantitative trait in 536 families from AGRE using parent reports.

```
CHR, CM, SNP, LOD
1, 0.014, rs903914, -0.348
1, 0.052, rs6665546, -0.386
1, 0.058, rs10910061, -0.377
1, 0.075, rs2843160, -0.352
1, 0.133, rs2840532, -0.316
1, 0.239, rs4531246, -0.330
1, 0.328, rs10910078, -0.337
1, 1.391, rs10909890, -0.297
1, 1.463, rs4648384, -0.296
1, 1.591, rs10797342, -0.276
1, 1.761, rs10797368, -0.256
1, 1.840, rs11583804, -0.247
1, 1.844, rs878201, -0.247
1, 1.858, rs2485945, -0.249
1, 1.875, rs12044030, -0.255
1, 2.046, rs2142569, -0.332
1, 2.207, rs1569419, -0.318
1, 2.237, rs926244, -0.310
1, 2.260, rs2817168, -0.297
1, 2.280, rs2993493, -0.261
1, 2.364, rs2817178, -0.242
1, 2.411, rs2817185, -0.237
1, 2.468, rs1798246, -0.231
1, 2.634, rs12124147, -0.216
1, 2.637, rs2651906, -0.216
1, 2.653, rs16823542, -0.213
1, 2.721, rs2455118, -0.175
1, 2.740, rs10797386, -0.165
1, 2.768, rs3002685, -0.150
1, 2.864, rs10909918, -0.148
1, 3.029, rs4415513, -0.123
1, 3.054, rs2483256, -0.127
1, 3.128, rs4648489, -0.123
1, 3.131, rs2493310, -0.104
1, 3.151, rs868688, -0.129
1, 3.173, rs2493275, -0.142
1, 3.213, rs12024847, -0.167
1, 3.260, rs1984069, -0.198
1, 3.281, rs870171, -0.194
1, 3.302, rs2493272, -0.193
1, 3.475, rs4648505, -0.174
1, 3.531, rs947344, -0.161
1, 3.616, rs12119711, -0.143
1, 3.634, rs4648524, -0.137
1, 3.684, rs878063, -0.122
1, 3.690, rs2821063, -0.120
1, 3.803, rs7544357, -0.087
1, 3.866, rs4648398, -0.091
1, 3.906, rs4276857, -0.117
1, 4.031, rs3765692, -0.184
1, 4.055, rs3765703, -0.163
1, 4.069, rs3765705, -0.166
1, 4.173, rs3765761, -0.166
1, 4.191, rs747827, -0.156
1, 4.320, rs1181883, -0.113
1, 4.329, rs1181877, -0.112
1, 4.376, rs2799182, -0.092
```

1,4.523,rs6663840,-0.071  
1,4.640,rs10797348,-0.072  
1,4.710,rs7367066,-0.077  
1,4.735,rs12082157,-0.073  
1,5.328,rs12724233,-0.033  
1,5.341,rs7519458,-0.029  
1,5.350,rs6661168,-0.024  
1,5.352,rs4654482,-0.017  
1,5.358,rs11590912,-0.006  
1,5.367,rs6681347,-0.004  
1,5.425,rs12031557,-0.008  
1,5.443,rs11587331,-0.009  
1,5.724,rs4391636,-0.007  
1,5.729,rs12093951,-0.007  
1,5.793,rs4462110,-0.002  
1,5.794,rs6676961,-0.002  
1,5.812,rs10915428,-0.003  
1,5.847,rs7548756,-0.003  
1,6.155,rs6426402,-0.001  
1,6.178,rs10915478,-0.002  
1,6.235,rs12132422,-0.005  
1,6.296,rs966321,-0.011  
1,6.445,rs1762814,-0.022  
1,6.475,rs780587,-0.023  
1,6.585,rs11799990,-0.026  
1,6.620,rs1878052,-0.026  
1,6.700,rs6703696,-0.027  
1,6.823,rs6685798,-0.028  
1,6.948,rs12567277,-0.030  
1,6.968,rs164781,-0.030  
1,7.032,rs875807,-0.031  
1,7.108,rs10915577,-0.055  
1,7.170,rs11587129,-0.081  
1,7.190,rs2071995,-0.085  
1,7.205,rs763238,-0.085  
1,7.242,rs7518469,-0.088  
1,7.324,rs3820252,-0.122  
1,7.332,rs242044,-0.123  
1,7.367,rs3753702,-0.128  
1,7.438,rs12119789,-0.120  
1,7.549,rs4654607,-0.155  
1,7.627,rs2181699,-0.162  
1,7.700,rs7549868,-0.169  
1,7.826,rs6426446,-0.175  
1,7.877,rs10915668,-0.174  
1,7.900,rs11585268,-0.175  
1,7.944,rs10915683,-0.175  
1,7.961,rs12042532,-0.196  
1,7.965,rs9286971,-0.194  
1,8.007,rs12029491,-0.201  
1,8.017,rs10799145,-0.202  
1,8.028,rs3101219,-0.208  
1,8.064,rs6666330,-0.226  
1,8.084,rs7365286,-0.236  
1,8.125,rs9662885,-0.246  
1,8.226,rs10799157,-0.265  
1,8.249,rs1563792,-0.264  
1,8.325,rs2242157,-0.274  
1,8.486,rs6698702,-0.322  
1,8.523,rs7536712,-0.331  
1,8.618,rs12026938,-0.324

1,8.642,rs12135834,-0.320  
1,8.648,rs4475768,-0.247  
1,8.648,rs494046,-0.243  
1,8.667,rs630153,-0.219  
1,8.712,rs12141954,-0.221  
1,8.713,rs604664,-0.221  
1,8.720,rs557477,-0.222  
1,8.738,rs912988,-0.235  
1,8.754,rs11579000,-0.237  
1,8.773,rs12040942,-0.238  
1,8.886,rs6681674,-0.274  
1,9.004,rs3924260,-0.277  
1,9.134,rs1004125,-0.300  
1,9.152,rs11260698,-0.303  
1,9.217,rs10796400,-0.337  
1,9.268,rs7515958,-0.358  
1,9.348,rs1775421,-0.398  
1,9.350,rs1818038,-0.398  
1,9.358,rs1775416,-0.401  
1,9.412,rs707582,-0.374  
1,9.431,rs9439605,-0.362  
1,9.439,rs945322,-0.365  
1,9.487,rs971816,-0.385  
1,9.493,rs709184,-0.424  
1,9.499,rs707590,-0.409  
1,9.611,rs770693,-0.416  
1,9.752,rs4129514,-0.461  
1,9.899,rs1698976,-0.538  
1,9.926,rs548726,-0.541  
1,10.154,rs551207,-0.558  
1,10.531,rs546526,-0.513  
1,10.706,rs1295087,-0.516  
1,10.949,rs3789541,-0.519  
1,11.122,rs2281303,-0.581  
1,11.152,rs1883767,-0.583  
1,11.323,rs9435102,-0.544  
1,11.371,rs1883604,-0.564  
1,11.386,rs731975,-0.573  
1,11.481,rs1802353,-0.577  
1,11.540,rs4908874,-0.560  
1,11.626,rs6696861,-0.586  
1,11.802,rs2103673,-0.553  
1,11.903,rs4908898,-0.507  
1,12.000,rs12041318,-0.486  
1,12.012,rs449250,-0.484  
1,12.021,rs12069069,-0.479  
1,12.075,rs6688732,-0.447  
1,12.096,rs11586867,-0.449  
1,12.285,rs4243823,-0.406  
1,12.616,rs2187901,-0.309  
1,12.660,rs2071917,-0.301  
1,12.777,rs17030322,-0.286  
1,12.783,rs17349921,-0.284  
1,12.856,rs970973,-0.256  
1,12.858,rs1894647,-0.288  
1,12.880,rs6680365,-0.290  
1,12.985,rs6701870,-0.239  
1,13.007,rs6577430,-0.228  
1,13.039,rs12409413,-0.193  
1,13.086,rs7543711,-0.179  
1,13.140,rs1029322,-0.178

1,13.170,rs845246,-0.178  
1,13.419,rs845251,-0.192  
1,13.430,rs12088178,-0.188  
1,13.452,rs9988557,-0.179  
1,13.574,rs1193185,-0.157  
1,13.580,rs17030993,-0.150  
1,13.600,rs1193167,-0.123  
1,13.603,rs6577449,-0.116  
1,13.605,rs12407666,-0.113  
1,13.609,rs1193158,-0.088  
1,13.610,rs4908654,-0.082  
1,13.621,rs4317829,-0.079  
1,13.658,rs17027053,-0.096  
1,13.669,rs4908473,-0.096  
1,13.690,rs3011936,-0.091  
1,13.698,rs2301488,-0.093  
1,13.715,rs707455,-0.092  
1,13.758,rs228648,-0.113  
1,13.786,rs679563,-0.127  
1,13.896,rs225133,-0.127  
1,14.024,rs7529511,-0.112  
1,14.031,rs9434617,-0.112  
1,14.031,rs9434618,-0.111  
1,14.031,rs6701300,-0.110  
1,14.059,rs17032281,-0.106  
1,14.088,rs6663882,-0.101  
1,14.128,rs390468,-0.095  
1,14.137,rs506403,-0.094  
1,14.152,rs299499,-0.091  
1,14.212,rs438895,-0.098  
1,14.262,rs1466654,-0.104  
1,14.826,rs17383360,-0.094  
1,14.974,rs2038903,-0.091  
1,14.987,rs2781064,-0.094  
1,15.073,rs9434652,-0.105  
1,15.083,rs6688840,-0.108  
1,15.096,rs2274328,-0.111  
1,15.135,rs6577546,-0.120  
1,15.142,rs17032942,-0.124  
1,15.161,rs2895997,-0.131  
1,15.164,rs7516862,-0.133  
1,15.174,rs7530465,-0.138  
1,15.181,rs7537425,-0.163  
1,15.245,rs1612895,-0.156  
1,15.267,rs1327257,-0.138  
1,15.297,rs6697376,-0.127  
1,15.362,rs12128240,-0.131  
1,15.377,rs797252,-0.136  
1,15.392,rs4908527,-0.140  
1,15.407,rs4908817,-0.139  
1,15.450,rs1009940,-0.155  
1,15.507,rs2268169,-0.167  
1,15.510,rs6688832,-0.202  
1,15.579,rs916380,-0.188  
1,15.618,rs4465231,-0.189  
1,15.634,rs9726385,-0.188  
1,15.807,rs926249,-0.156  
1,15.829,rs17377604,-0.151  
1,15.865,rs4908842,-0.128  
1,15.986,rs2075972,-0.166  
1,16.022,rs4908851,-0.181

1,16.115,rs2275457,-0.157  
1,16.197,rs9729149,-0.155  
1,16.306,rs6688312,-0.148  
1,16.499,rs10864418,-0.173  
1,16.610,rs12034064,-0.190  
1,16.610,rs10864424,-0.190  
1,16.611,rs4926491,-0.190  
1,16.620,rs12755956,-0.191  
1,16.646,rs4240896,-0.194  
1,16.655,rs12075554,-0.192  
1,16.679,rs1933734,-0.160  
1,16.746,rs10492969,-0.141  
1,17.146,rs12741973,-0.116  
1,17.268,rs3790630,-0.115  
1,17.332,rs17035482,-0.115  
1,17.543,rs516243,-0.095  
1,17.567,rs4845948,-0.096  
1,17.585,rs7514751,-0.116  
1,17.725,rs4845953,-0.078  
1,17.771,rs205483,-0.092  
1,17.773,rs205484,-0.092  
1,17.815,rs205488,-0.099  
1,17.983,rs1776220,-0.106  
1,18.030,rs539790,-0.120  
1,18.033,rs634478,-0.121  
1,18.082,rs12140279,-0.130  
1,18.153,rs7543046,-0.142  
1,18.161,rs1280988,-0.142  
1,18.198,rs1280996,-0.166  
1,18.317,rs10864479,-0.175  
1,18.379,rs12748162,-0.176  
1,18.514,rs11121663,-0.177  
1,18.544,rs2003046,-0.175  
1,18.641,rs11121675,-0.198  
1,19.765,rs2982373,-0.273  
1,19.840,rs909836,-0.261  
1,20.008,rs12058244,-0.229  
1,20.132,rs11585441,-0.226  
1,20.150,rs3124627,-0.225  
1,20.455,rs11808316,-0.272  
1,20.558,rs761087,-0.284  
1,20.648,rs17037122,-0.282  
1,20.706,rs9614,-0.238  
1,20.724,rs12139487,-0.230  
1,20.777,rs2336030,-0.264  
1,20.866,rs6687381,-0.363  
1,20.875,rs2336034,-0.356  
1,20.895,rs4846028,-0.343  
1,20.943,rs12095517,-0.364  
1,20.958,rs4073574,-0.365  
1,21.204,rs198388,-0.345  
1,21.300,rs7554547,-0.377  
1,21.302,rs2273289,-0.386  
1,21.303,rs2295281,-0.394  
1,21.304,rs4514248,-0.391  
1,21.306,rs6690493,-0.423  
1,21.307,rs6541014,-0.432  
1,21.307,rs501525,-0.423  
1,21.308,rs535068,-0.419  
1,21.308,rs3766735,-0.412  
1,21.308,rs631272,-0.399

1,21.309,rs976881,-0.391  
1,21.310,rs1201157,-0.387  
1,21.329,rs1061631,-0.351  
1,21.342,rs7552664,-0.345  
1,21.344,rs7550488,-0.345  
1,21.414,rs3765339,-0.319  
1,21.792,rs6541025,-0.290  
1,21.793,rs7521256,-0.290  
1,21.797,rs2038118,-0.259  
1,21.831,rs4997711,-0.257  
1,21.882,rs4846127,-0.226  
1,21.892,rs4394668,-0.229  
1,21.903,rs3010928,-0.234  
1,21.910,rs3010931,-0.236  
1,21.923,rs4845911,-0.241  
1,21.965,rs11121955,-0.274  
1,22.022,rs10779772,-0.288  
1,22.106,rs2359533,-0.318  
1,22.184,rs4845917,-0.312  
1,22.232,rs11810835,-0.315  
1,23.810,rs3013105,-0.306  
1,23.836,rs3845608,-0.303  
1,23.861,rs3013045,-0.301  
1,23.911,rs2999899,-0.299  
1,24.033,rs12034380,-0.311  
1,24.101,rs355013,-0.315  
1,24.178,rs876931,-0.375  
1,24.184,rs11588651,-0.346  
1,24.193,rs7515525,-0.301  
1,24.480,rs1203651,-0.329  
1,24.513,rs760914,-0.331  
1,24.520,rs2281164,-0.331  
1,24.553,rs2697971,-0.322  
1,24.576,rs982510,-0.317  
1,24.644,rs12407665,-0.282  
1,24.658,rs2744656,-0.285  
1,24.663,rs9287293,-0.292  
1,24.699,rs6429800,-0.345  
1,24.712,rs6697531,-0.359  
1,24.744,rs7542884,-0.354  
1,24.803,rs12043211,-0.324  
1,24.852,rs4661462,-0.326  
1,24.869,rs6681501,-0.326  
1,24.965,rs2359908,-0.329  
1,25.014,rs10737918,-0.331  
1,25.044,rs742545,-0.343  
1,25.142,rs7515917,-0.383  
1,25.156,rs16853600,-0.411  
1,25.166,rs2359942,-0.403  
1,25.279,rs12568548,-0.405  
1,25.314,rs517269,-0.394  
1,25.514,rs10928060,-0.333  
1,25.578,rs1538534,-0.297  
1,25.595,rs1416624,-0.317  
1,25.650,rs2149507,-0.293  
1,25.698,rs2789746,-0.302  
1,25.761,rs10754853,-0.262  
1,25.824,rs943918,-0.206  
1,25.825,rs12141361,-0.206  
1,25.977,rs4661496,-0.148  
1,26.073,rs10803285,-0.144

1,26.116,rs3892594,-0.151  
1,26.180,rs4385705,-0.155  
1,26.244,rs7527439,-0.158  
1,26.589,rs761191,-0.147  
1,26.711,rs2871581,-0.156  
1,26.948,rs6429675,-0.166  
1,26.965,rs6661767,-0.167  
1,27.020,rs732469,-0.210  
1,27.177,rs3845590,-0.214  
1,27.248,rs11585327,-0.195  
1,27.277,rs804129,-0.193  
1,27.288,rs3845596,-0.223  
1,27.294,rs4661539,-0.246  
1,27.445,rs4661548,-0.322  
1,27.512,rs7531035,-0.312  
1,27.521,rs4661310,-0.325  
1,27.544,rs2311975,-0.393  
1,27.556,rs6429703,-0.406  
1,27.579,rs6684496,-0.400  
1,27.612,rs6704367,-0.377  
1,27.616,rs10927657,-0.373  
1,27.667,rs4661572,-0.300  
1,27.707,rs3752934,-0.237  
1,27.738,rs2235789,-0.195  
1,27.932,rs10803369,-0.066  
1,27.950,rs767255,-0.061  
1,27.957,rs1752026,-0.062  
1,28.000,rs6676098,-0.071  
1,28.031,rs10927764,-0.077  
1,28.044,rs536364,-0.069  
1,28.067,rs10803378,-0.065  
1,28.163,rs2473358,-0.052  
1,28.256,rs733887,-0.036  
1,28.328,rs555015,-0.022  
1,28.466,rs1052571,-0.006  
1,28.868,rs10927848,-0.000  
1,28.930,rs11576404,-0.000  
1,29.227,rs848189,0.001  
1,29.434,rs9442235,0.004  
1,29.436,rs11801060,0.004  
1,29.563,rs11260745,0.006  
1,29.649,rs11260930,0.007  
1,30.051,rs4661747,0.015  
1,30.128,rs279788,0.016  
1,30.185,rs156851,0.017  
1,31.025,rs4920355,0.015  
1,31.131,rs2871775,0.015  
1,31.138,rs978528,0.015  
1,31.250,rs2647185,0.012  
1,31.307,rs1005753,0.010  
1,31.388,rs2454170,0.007  
1,31.425,rs2935923,0.005  
1,31.472,rs2977272,0.003  
1,31.480,rs2977283,0.003  
1,31.498,rs16823950,0.003  
1,31.500,rs2977290,0.003  
1,31.503,rs10127662,0.003  
1,31.505,rs12091488,0.002  
1,31.522,rs2977310,-0.005  
1,31.624,rs7548900,-0.003  
1,31.686,rs11203366,-0.003

1,31.706,rs1748020,-0.004  
1,31.797,rs6695214,-0.008  
1,32.035,rs2247863,-0.019  
1,32.069,rs4920374,-0.021  
1,32.097,rs2256114,-0.023  
1,32.152,rs4920380,-0.023  
1,32.276,rs10888046,-0.011  
1,32.324,rs6657353,-0.012  
1,32.367,rs2134482,-0.012  
1,32.397,rs7522419,-0.012  
1,32.433,rs11581535,-0.008  
1,32.439,rs260514,-0.009  
1,32.654,rs694214,-0.022  
1,32.701,rs647325,-0.024  
1,32.729,rs647619,-0.025  
1,32.927,rs661977,-0.030  
1,32.999,rs1192630,-0.027  
1,33.023,rs6685120,-0.026  
1,33.093,rs1192617,-0.020  
1,33.163,rs875294,-0.017  
1,33.190,rs4532860,-0.017  
1,33.517,rs4920428,-0.025  
1,33.520,rs12739708,-0.025  
1,33.524,rs9659104,-0.026  
1,33.571,rs4920295,-0.028  
1,33.625,rs12072266,-0.020  
1,33.668,rs9725656,-0.021  
1,33.723,rs9329469,-0.023  
1,33.765,rs16861648,-0.027  
1,33.769,rs9659675,-0.028  
1,33.808,rs11802233,-0.032  
1,33.845,rs9726406,-0.028  
1,33.891,rs10907289,-0.032  
1,33.894,rs9727616,-0.032  
1,33.932,rs12023073,-0.038  
1,34.084,rs17436172,-0.026  
1,34.099,rs1399437,-0.023  
1,34.153,rs109490,-0.013  
1,34.188,rs223179,-0.011  
1,34.273,rs11801569,-0.010  
1,34.458,rs6663855,-0.002  
1,34.584,rs542634,-0.013  
1,34.709,rs10465918,-0.015  
1,34.743,rs7538502,-0.016  
1,34.824,rs7512723,-0.016  
1,34.968,rs1850750,-0.012  
1,35.156,rs11261017,-0.008  
1,35.207,rs10907314,-0.005  
1,35.353,rs2816025,-0.001  
1,35.381,rs2816030,-0.001  
1,35.462,rs2745327,0.000  
1,35.483,rs4920514,0.000  
1,35.526,rs11261034,0.000  
1,35.617,rs7549273,-0.000  
1,35.633,rs4920515,-0.000  
1,35.716,rs2816065,-0.000  
1,36.488,rs2236835,0.000  
1,36.746,rs2743208,0.000  
1,36.753,rs585075,0.000  
1,36.753,rs12760805,0.000  
1,36.781,rs501080,0.002



1,36.809,rs2236817,0.012  
1,36.826,rs2236805,0.011  
1,36.829,rs9439731,0.013  
1,36.871,rs1160680,0.020  
1,36.887,rs2841055,0.020  
1,36.911,rs2789334,0.021  
1,36.916,rs2841087,0.021  
1,37.083,rs7549129,0.018  
1,37.086,rs7533384,0.018  
1,37.303,rs6686865,0.022  
1,37.305,rs6684577,0.021  
1,37.324,rs4912075,0.009  
1,37.328,rs9426794,0.009  
1,37.363,rs7531434,0.013  
1,37.454,rs9729157,0.011  
1,37.461,rs2073098,0.011  
1,37.473,rs214338,0.011  
1,37.480,rs6663076,0.010  
1,37.552,rs10917477,0.001  
1,37.555,rs12123337,0.001  
1,37.587,rs4508039,0.001  
1,37.705,rs860847,0.000  
1,37.907,rs3813987,0.001  
1,37.932,rs3934191,0.000  
1,37.956,rs4912019,0.000  
1,38.002,rs4326647,0.000  
1,38.092,rs1266437,-0.002  
1,38.096,rs10917536,-0.003  
1,38.125,rs12140071,-0.004  
1,38.183,rs2314759,-0.007  
1,38.188,rs7513083,-0.008  
1,38.189,rs7513369,-0.009  
1,38.193,rs1317209,-0.012  
1,38.203,rs17396847,-0.021  
1,38.212,rs10799839,-0.021  
1,38.235,rs4509550,-0.023  
1,38.333,rs4654903,-0.021  
1,38.424,rs1111872,-0.021  
1,38.447,rs2233688,-0.021  
1,38.447,rs2233687,-0.021  
1,38.546,rs6672057,-0.020  
1,38.574,rs3753827,-0.020  
1,38.744,rs617363,-0.035  
1,38.869,rs599367,-0.015  
1,38.877,rs7551550,-0.008  
1,38.910,rs623784,-0.005  
1,38.939,rs631134,-0.004  
1,38.991,rs876171,-0.003  
1,39.024,rs2301478,-0.002  
1,39.058,rs17354867,-0.001  
1,39.083,rs2097532,-0.001  
1,39.111,rs7541616,0.000  
1,39.136,rs10916749,0.001  
1,39.146,rs16823800,0.001  
1,39.151,rs2223225,0.001  
1,39.213,rs230178,0.003  
1,39.214,rs230177,0.003  
1,39.238,rs10916780,0.003  
1,39.281,rs7537381,0.003  
1,39.306,rs11799849,0.004  
1,39.392,rs616145,0.014

1,39.424,rs472055,0.025  
1,39.429,rs1890005,0.025  
1,39.507,rs1043424,0.029  
1,39.532,rs10916848,0.030  
1,39.548,rs628265,0.050  
1,39.552,rs683936,0.053  
1,40.143,rs1067242,0.034  
1,40.174,rs3026845,0.033  
1,40.184,rs84853,0.032  
1,40.203,rs4654918,0.032  
1,40.262,rs213006,0.034  
1,40.281,rs16825276,0.035  
1,40.336,rs4614227,0.039  
1,40.586,rs1827293,0.062  
1,40.645,rs1780321,0.068  
1,40.669,rs12127343,0.070  
1,40.682,rs3767150,0.067  
1,40.685,rs1780320,0.065  
1,40.699,rs10917023,0.054  
1,40.721,rs12142081,0.039  
1,40.737,rs829398,0.038  
1,40.752,rs829387,0.037  
1,40.762,rs1018102,0.036  
1,40.820,rs13374837,0.036  
1,40.821,rs2010397,0.036  
1,40.830,rs4654771,0.037  
1,40.917,rs12049408,0.059  
1,40.944,rs3768574,0.058  
1,40.948,rs2473277,0.058  
1,41.020,rs2744721,0.072  
1,41.024,rs2807356,0.073  
1,41.036,rs10753531,0.075  
1,41.058,rs2744738,0.078  
1,41.082,rs736473,0.090  
1,41.100,rs10799746,0.096  
1,41.108,rs4655040,0.095  
1,41.139,rs6682619,0.092  
1,41.164,rs4655059,0.105  
1,41.264,rs2078450,0.128  
1,41.684,rs766910,0.156  
1,41.705,rs209709,0.159  
1,42.031,rs587585,0.174  
1,42.084,rs652826,0.177  
1,42.185,rs7549747,0.181  
1,42.380,rs734445,0.208  
1,42.480,rs6673115,0.191  
1,42.547,rs893964,0.178  
1,42.550,rs1561625,0.179  
1,42.581,rs4654814,0.195  
1,42.628,rs2817909,0.189  
1,42.768,rs2869511,0.162  
1,42.806,rs1208932,0.215  
1,43.015,rs2075993,0.163  
1,43.042,rs3218121,0.159  
1,43.099,rs10917395,0.166  
1,43.112,rs2683061,0.190  
1,43.126,rs2864889,0.213  
1,43.215,rs6673098,0.255  
1,43.296,rs10917420,0.293  
1,43.377,rs11714,0.295  
1,43.701,rs4648930,0.304

1,43.701,rs4648931,0.304  
1,43.734,rs4649183,0.307  
1,43.736,rs6700245,0.310  
1,43.755,rs3934861,0.341  
1,43.781,rs11577442,0.347  
1,43.815,rs10903034,0.389  
1,43.860,rs11587500,0.388  
1,43.871,rs870549,0.354  
1,44.005,rs12080352,0.388  
1,44.068,rs7527465,0.425  
1,44.210,rs195729,0.424  
1,44.235,rs195712,0.468  
1,44.288,rs11801547,0.478  
1,44.337,rs4648998,0.485  
1,44.364,rs10903095,0.476  
1,44.373,rs4649002,0.471  
1,44.488,rs11249163,0.402  
1,44.501,rs1002706,0.392  
1,44.559,rs3131513,0.350  
1,44.570,rs6663310,0.342  
1,44.571,rs7553295,0.342  
1,44.582,rs6662768,0.329  
1,44.591,rs7551188,0.317  
1,44.603,rs1609996,0.293  
1,44.605,rs311484,0.301  
1,44.623,rs16830307,0.287  
1,44.626,rs387240,0.284  
1,44.628,rs1702312,0.283  
1,44.636,rs4649060,0.264  
1,44.639,rs12031599,0.270  
1,44.643,rs380337,0.278  
1,44.646,rs12081177,0.264  
1,44.651,rs11588172,0.238  
1,44.656,rs803313,0.271  
1,44.669,rs7530932,0.277  
1,44.693,rs742391,0.281  
1,44.792,rs10903129,0.221  
1,44.845,rs4659356,0.160  
1,44.945,rs3767880,0.130  
1,44.972,rs2072748,0.141  
1,44.994,rs6696298,0.150  
1,45.093,rs12037513,0.147  
1,45.227,rs4659404,0.187  
1,45.338,rs10794522,0.226  
1,45.447,rs12096059,0.228  
1,45.448,rs11247894,0.228  
1,45.557,rs12137896,0.239  
1,45.643,rs12741800,0.245  
1,45.718,rs1002487,0.227  
1,45.784,rs190737,0.214  
1,45.805,rs6598858,0.248  
1,45.834,rs17162247,0.246  
1,45.876,rs4970479,0.241  
1,46.307,rs11247599,0.197  
1,46.369,rs12742376,0.195  
1,46.381,rs4970469,0.195  
1,46.407,rs537951,0.189  
1,46.419,rs484677,0.183  
1,46.535,rs11247639,0.127  
1,46.552,rs2504786,0.123  
1,46.657,rs12146138,0.144

1,46.692,rs4908343,0.151  
1,46.747,rs10902662,0.164  
1,46.758,rs12743229,0.167  
1,46.796,rs1767523,0.181  
1,46.923,rs3766400,0.190  
1,46.972,rs1010082,0.198  
1,47.109,rs6598919,0.197  
1,47.240,rs508772,0.200  
1,47.704,rs678849,0.168  
1,47.734,rs508448,0.168  
1,47.753,rs157198,0.187  
1,47.941,rs12045777,0.175  
1,48.109,rs7524056,0.140  
1,48.110,rs2235937,0.140  
1,48.122,rs2007350,0.139  
1,48.173,rs1886651,0.119  
1,48.182,rs4654337,0.098  
1,48.183,rs212306,0.097  
1,48.210,rs912772,0.066  
1,48.213,rs7529591,0.063  
1,48.222,rs6685390,0.056  
1,48.246,rs11804085,0.053  
1,48.252,rs6694109,0.053  
1,48.256,rs6426365,0.052  
1,48.309,rs7418865,0.050  
1,48.787,rs387232,0.040  
1,48.794,rs271392,0.039  
1,48.797,rs10753234,0.038  
1,48.877,rs920600,0.038  
1,48.922,rs12058382,0.044  
1,48.930,rs17262748,0.045  
1,48.997,rs12748731,0.034  
1,49.007,rs17341224,0.032  
1,49.049,rs1448339,0.037  
1,49.067,rs7513406,0.039  
1,49.090,rs2377151,0.049  
1,49.101,rs752685,0.053  
1,49.118,rs873894,0.052  
1,49.170,rs10798927,0.052  
1,49.310,rs10753300,0.056  
1,49.316,rs1503772,0.056  
1,49.332,rs1149064,0.058  
1,49.342,rs369715,0.056  
1,49.380,rs7541381,0.047  
1,49.413,rs7530575,0.042  
1,49.477,rs4245643,0.041  
1,49.590,rs7516871,0.037  
1,49.669,rs462649,0.040  
1,49.931,rs10915065,0.048  
1,50.026,rs12057521,0.051  
1,50.071,rs7528451,0.040  
1,50.446,rs650676,0.043  
1,50.469,rs686393,0.044  
1,50.590,rs744528,0.046  
1,50.600,rs1001704,0.048  
1,50.898,rs12144776,0.041  
1,51.001,rs9628644,0.045  
1,51.274,rs10914150,0.052  
1,51.376,rs1188414,0.053  
1,51.588,rs2147081,0.064  
1,51.656,rs1188444,0.064

1,51.740,rs1188394,0.032  
1,51.740,rs4949302,0.034  
1,51.746,rs10914217,0.028  
1,51.747,rs4551635,0.028  
1,51.748,rs2488230,0.026  
1,51.749,rs2488233,0.022  
1,51.751,rs2488238,0.016  
1,51.753,rs10753239,0.016  
1,51.754,rs7529390,0.018  
1,51.756,rs6680835,0.021  
1,52.020,rs10493048,0.031  
1,52.032,rs10914436,0.031  
1,52.053,rs4949213,0.033  
1,52.178,rs4949459,0.055  
1,52.197,rs10493049,0.042  
1,52.255,rs6656287,0.045  
1,52.290,rs11578323,0.047  
1,52.366,rs648718,0.049  
1,52.601,rs695161,0.055  
1,52.693,rs16834981,0.051  
1,52.696,rs10914555,0.051  
1,52.825,rs6678903,0.048  
1,52.876,rs359955,0.035  
1,52.932,rs644879,0.045  
1,52.979,rs16835176,0.045  
1,53.088,rs194663,0.047  
1,53.199,rs84314,0.048  
1,53.225,rs11582222,0.052  
1,53.343,rs4361958,0.073  
1,53.572,rs6661037,0.098  
1,53.720,rs10737370,0.117  
1,53.904,rs10798959,0.134  
1,54.042,rs923882,0.137  
1,54.079,rs6701268,0.136  
1,54.112,rs12727575,0.133  
1,54.170,rs1874045,0.118  
1,54.447,rs732889,0.072  
1,54.525,rs16835734,0.066  
1,54.535,rs562189,0.065  
1,54.653,rs580682,0.072  
1,54.700,rs2583453,0.064  
1,54.772,rs479938,0.054  
1,54.790,rs524787,0.051  
1,54.832,rs6425838,0.061  
1,54.833,rs1441521,0.061  
1,55.185,rs10914802,0.096  
1,55.216,rs12568620,0.092  
1,55.279,rs1570089,0.082  
1,55.351,rs6697504,0.068  
1,55.371,rs10914816,0.066  
1,55.378,rs7555410,0.065  
1,55.493,rs549048,0.079  
1,55.509,rs483083,0.081  
1,55.517,rs545337,0.081  
1,55.592,rs12127677,0.071  
1,55.614,rs7551631,0.073  
1,55.666,rs12755908,0.104  
1,55.689,rs12406216,0.110  
1,55.693,rs2994598,0.111  
1,55.710,rs297791,0.111  
1,55.716,rs6698707,0.111

1,55.745,rs12128858,0.116  
1,55.851,rs2294193,0.138  
1,55.866,rs2294190,0.141  
1,55.870,rs1883109,0.143  
1,56.029,rs6661959,0.169  
1,56.080,rs728447,0.154  
1,56.116,rs14103,0.147  
1,56.116,rs4653107,0.146  
1,56.123,rs7541937,0.123  
1,56.133,rs7555884,0.127  
1,56.150,rs11263859,0.125  
1,56.234,rs499153,0.119  
1,56.315,rs1203138,0.129  
1,56.324,rs1203148,0.129  
1,57.417,rs768000,0.171  
1,57.567,rs795047,0.177  
1,57.791,rs6693113,0.175  
1,57.950,rs4653184,0.170  
1,58.052,rs525798,0.136  
1,58.169,rs484017,0.100  
1,58.270,rs513823,0.083  
1,58.471,rs3767065,0.052  
1,58.576,rs7517274,0.043  
1,58.615,rs550115,0.043  
1,58.650,rs535620,0.044  
1,58.717,rs3820274,0.043  
1,58.882,rs2859741,0.045  
1,58.945,rs6702349,0.050  
1,58.954,rs218422,0.051  
1,59.043,rs11263977,0.046  
1,59.204,rs998176,0.029  
1,59.578,rs949586,0.015  
1,59.612,rs4653277,0.017  
1,59.684,rs1004766,0.009  
1,59.845,rs10493079,0.004  
1,59.847,rs16824119,0.004  
1,59.975,rs2492301,0.002  
1,60.279,rs4074961,0.006  
1,60.324,rs10908366,0.007  
1,60.332,rs6687329,0.007  
1,60.344,rs10908367,0.007  
1,60.398,rs3790623,0.008  
1,60.428,rs12121777,0.009  
1,60.448,rs631432,0.005  
1,60.520,rs4308943,0.002  
1,60.868,rs4634868,-0.005  
1,60.874,rs6600436,-0.002  
1,60.895,rs11211383,-0.002  
1,61.018,rs486563,-0.001  
1,61.019,rs1108182,-0.001  
1,61.019,rs544700,-0.001  
1,61.037,rs2615811,-0.001  
1,61.166,rs10889449,-0.003  
1,61.205,rs745526,-0.006  
1,61.213,rs6683126,-0.006  
1,61.223,rs6685558,-0.006  
1,61.253,rs872595,-0.007  
1,61.300,rs10789332,-0.010  
1,61.303,rs6698091,-0.011  
1,61.413,rs11210569,-0.018  
1,61.477,rs17537940,-0.028

1,61.489,rs7521522,-0.030  
1,61.578,rs2256357,-0.053  
1,61.582,rs1932362,-0.053  
1,61.593,rs882000,-0.055  
1,61.615,rs2247965,-0.055  
1,61.616,rs12564999,-0.055  
1,61.699,rs2184611,-0.050  
1,61.743,rs11210966,-0.046  
1,61.790,rs10789446,-0.058  
1,61.791,rs4970603,-0.045  
1,61.806,rs1001450,-0.076  
1,61.822,rs3011179,-0.081  
1,61.839,rs2985774,-0.076  
1,61.928,rs730219,-0.047  
1,62.052,rs679143,-0.032  
1,62.123,rs2209477,-0.014  
1,62.164,rs9326146,-0.013  
1,62.289,rs2147914,-0.015  
1,62.373,rs12035946,-0.029  
1,62.405,rs4512638,-0.037  
1,62.448,rs6696013,-0.041  
1,62.481,rs10888621,-0.042  
1,62.598,rs9659165,-0.037  
1,62.604,rs260974,-0.036  
1,62.618,rs4660401,-0.036  
1,62.671,rs11205665,-0.035  
1,63.209,rs4660762,-0.026  
1,63.409,rs2243761,-0.024  
1,63.494,rs784622,-0.024  
1,63.571,rs784600,-0.023  
1,63.649,rs17561720,-0.019  
1,63.683,rs704782,-0.017  
1,63.720,rs704787,-0.015  
1,63.866,rs230284,-0.018  
1,63.944,rs230271,-0.015  
1,64.030,rs10489534,-0.016  
1,64.176,rs12127002,-0.018  
1,64.246,rs3131706,-0.018  
1,64.778,rs7529068,-0.016  
1,65.052,rs2284446,-0.014  
1,65.073,rs10489430,-0.014  
1,65.138,rs209914,-0.002  
1,65.175,rs11207870,-0.001  
1,65.201,rs10889285,-0.001  
1,65.267,rs3013462,-0.000  
1,65.335,rs16827275,0.000  
1,65.383,rs2982500,0.001  
1,65.392,rs2982502,0.001  
1,65.392,rs3969615,0.001  
1,65.507,rs4660438,-0.000  
1,65.545,rs7520333,-0.000  
1,65.662,rs2274956,0.000  
1,65.674,rs10158384,0.000  
1,65.714,rs4660464,-0.000  
1,65.731,rs4660468,-0.002  
1,65.743,rs963377,-0.003  
1,65.753,rs4660471,-0.003  
1,65.768,rs913382,-0.003  
1,65.807,rs10789250,-0.001  
1,65.825,rs6671627,-0.001  
1,65.838,rs4440845,-0.001

1,65.907,rs11802778,-0.001  
1,66.060,rs4660527,-0.001  
1,66.068,rs7539614,-0.001  
1,66.074,rs1317557,-0.001  
1,66.077,rs4660192,-0.000  
1,66.107,rs12402711,0.001  
1,66.135,rs12142181,0.002  
1,66.145,rs2483692,0.002  
1,66.160,rs6690839,0.002  
1,66.168,rs12718439,0.002  
1,66.208,rs640688,0.003  
1,66.355,rs6703365,0.007  
1,66.403,rs765040,0.012  
1,66.418,rs17373758,0.014  
1,66.440,rs16828739,0.018  
1,66.441,rs9943167,0.011  
1,66.490,rs883062,0.015  
1,66.640,rs2494366,0.022  
1,66.785,rs1016544,0.023  
1,66.849,rs11210691,0.016  
1,66.852,rs6688151,0.015  
1,66.934,rs11581921,0.012  
1,66.947,rs2816594,0.011  
1,67.013,rs11210729,0.007  
1,67.058,rs2792600,0.003  
1,67.066,rs16830039,0.002  
1,67.136,rs7413414,0.001  
1,67.157,rs9326132,0.000  
1,67.280,rs626842,0.000  
1,67.328,rs680343,-0.000  
1,67.354,rs622762,-0.000  
1,67.388,rs11210824,-0.000  
1,67.403,rs2784466,-0.000  
1,67.416,rs7527092,-0.000  
1,67.629,rs6695915,-0.003  
1,67.841,rs3828139,-0.005  
1,67.916,rs3011225,-0.006  
1,68.053,rs17402782,-0.010  
1,68.158,rs7523468,-0.013  
1,68.169,rs16831558,-0.013  
1,68.242,rs6698333,-0.014  
1,68.288,rs6690437,-0.015  
1,68.444,rs17414912,-0.005  
1,68.483,rs10489168,-0.003  
1,68.527,rs6699067,-0.002  
1,68.663,rs619199,-0.000  
1,68.666,rs6429539,-0.000  
1,68.700,rs3866643,-0.000  
1,68.703,rs11210996,-0.000  
1,68.706,rs1340647,-0.000  
1,68.792,rs9804150,-0.003  
1,68.801,rs7354900,-0.003  
1,68.812,rs6429541,-0.002  
1,68.832,rs6704115,0.000  
1,68.865,rs7554123,0.001  
1,68.874,rs11211012,0.002  
1,68.893,rs270764,0.000  
1,68.900,rs755597,0.000  
1,69.104,rs3863641,-0.011  
1,69.138,rs3766246,-0.012  
1,69.439,rs12022855,-0.013



1,69.544,rs614486,-0.009  
1,69.665,rs720413,-0.012  
1,69.769,rs13373822,-0.020  
1,70.054,rs9727862,-0.026  
1,70.061,rs1502908,-0.026  
1,70.299,rs2245122,-0.022  
1,70.340,rs13373881,-0.022  
1,70.829,rs2405922,-0.017  
1,71.039,rs515146,-0.014  
1,71.135,rs606852,-0.012  
1,71.160,rs518063,-0.009  
1,71.192,rs12028069,-0.005  
1,71.241,rs2457066,-0.004  
1,71.302,rs4554761,-0.003  
1,71.315,rs11211576,-0.001  
1,71.321,rs2506987,-0.000  
1,71.322,rs931937,-0.000  
1,71.331,rs12402179,-0.001  
1,71.364,rs4926966,-0.001  
1,71.398,rs1561572,-0.003  
1,71.406,rs1561573,-0.004  
1,71.418,rs3850885,-0.004  
1,71.429,rs4927069,-0.004  
1,71.442,rs12024706,-0.004  
1,71.524,rs11211632,-0.003  
1,71.550,rs11584659,-0.003  
1,71.550,rs17103991,-0.003  
1,71.581,rs303928,-0.003  
1,71.608,rs502819,-0.004  
1,71.614,rs560004,-0.004  
1,71.655,rs10489600,-0.006  
1,71.729,rs12098127,-0.005  
1,71.732,rs11205499,-0.007  
1,71.736,rs2354467,-0.007  
1,71.738,rs1539525,-0.009  
1,71.742,rs2803264,-0.012  
1,71.746,rs2803269,-0.012  
1,71.750,rs2803274,-0.012  
1,71.751,rs7539694,-0.011  
1,71.756,rs319978,-0.007  
1,71.757,rs6701767,-0.006  
1,71.778,rs319959,-0.004  
1,71.797,rs11586980,-0.002  
1,71.853,rs10888636,-0.000  
1,71.967,rs10489427,-0.000  
1,72.050,rs11205641,0.000  
1,72.107,rs10493151,0.000  
1,72.123,rs17105974,0.000  
1,72.141,rs12043872,0.000  
1,72.178,rs4926849,0.000  
1,72.231,rs1875635,0.000  
1,72.318,rs1278537,0.001  
1,72.386,rs1149795,0.000  
1,72.389,rs11581155,0.000  
1,72.498,rs12134299,0.001  
1,73.217,rs12138419,0.001  
1,73.227,rs835342,0.001  
1,73.248,rs6671552,0.001  
1,73.263,rs2050695,0.002  
1,73.287,rs625829,0.003  
1,73.300,rs681865,0.004

1,73.429,rs6664794,0.001  
1,73.559,rs512723,0.001  
1,73.842,rs3820201,0.000  
1,73.905,rs1320594,0.000  
1,73.940,rs6682324,-0.000  
1,73.948,rs6695567,-0.000  
1,74.051,rs1799821,-0.001  
1,74.229,rs1288502,0.001  
1,74.242,rs1288495,0.001  
1,74.250,rs867884,0.001  
1,74.357,rs4926976,0.002  
1,74.416,rs1316436,0.003  
1,74.496,rs6656566,0.005  
1,74.506,rs2000239,0.005  
1,74.673,rs11206165,0.009  
1,74.711,rs2280511,0.003  
1,74.775,rs11206169,0.001  
1,74.796,rs563403,0.001  
1,74.829,rs4927007,0.000  
1,74.847,rs1983485,0.000  
1,75.030,rs2141079,0.000  
1,75.230,rs1725982,0.000  
1,75.253,rs1183394,0.001  
1,75.347,rs1181180,0.001  
1,75.485,rs6588492,0.002  
1,75.589,rs2235544,0.001  
1,75.912,rs3820112,0.002  
1,76.063,rs612368,0.002  
1,76.089,rs12078845,0.001  
1,76.159,rs686106,0.000  
1,76.303,rs686930,0.003  
1,76.397,rs11206315,0.000  
1,76.423,rs6697414,0.000  
1,76.425,rs4927081,0.000  
1,76.448,rs7523947,0.005  
1,76.457,rs6695534,0.006  
1,76.704,rs4927101,0.022  
1,76.758,rs1543369,0.022  
1,76.844,rs190963,0.023  
1,76.875,rs904218,0.020  
1,76.890,rs1888182,0.019  
1,76.989,rs7515747,0.014  
1,76.992,rs299872,0.013  
1,77.059,rs1755588,0.014  
1,77.062,rs300269,0.014  
1,77.148,rs11206396,0.020  
1,77.288,rs7551288,0.070  
1,77.304,rs601902,0.070  
1,77.378,rs626353,0.064  
1,77.404,rs2114574,0.056  
1,77.474,rs4927186,0.023  
1,77.484,rs2182832,0.021  
1,77.486,rs2149037,0.020  
1,77.493,rs2479394,0.019  
1,77.534,rs11206514,0.011  
1,77.662,rs1165226,0.038  
1,77.747,rs880385,0.055  
1,77.757,rs17112041,0.059  
1,77.797,rs987029,0.067  
1,77.826,rs356086,0.073  
1,77.836,rs1392127,0.076

1,77.846,rs1499672,0.079  
1,77.880,rs10443215,0.078  
1,77.885,rs9436516,0.081  
1,77.912,rs1183736,0.099  
1,77.927,rs12098020,0.110  
1,77.939,rs11577319,0.116  
1,77.965,rs10493190,0.129  
1,77.977,rs4540693,0.136  
1,78.373,rs1412215,0.148  
1,78.510,rs1229948,0.146  
1,79.041,rs2793673,0.149  
1,79.060,rs12070360,0.148  
1,79.192,rs10159099,0.142  
1,79.369,rs4431886,0.118  
1,79.471,rs884277,0.116  
1,79.482,rs12093027,0.117  
1,79.534,rs875153,0.132  
1,79.562,rs3892374,0.137  
1,79.689,rs4628,0.118  
1,79.723,rs12081589,0.115  
1,79.778,rs1041602,0.119  
1,79.829,rs933001,0.129  
1,79.960,rs11206887,0.135  
1,80.092,rs10489618,0.108  
1,80.144,rs857107,0.092  
1,80.187,rs1569746,0.083  
1,80.206,rs2298130,0.083  
1,80.226,rs6662617,0.082  
1,80.256,rs6672416,0.101  
1,80.264,rs947636,0.101  
1,80.286,rs761964,0.093  
1,80.295,rs706469,0.090  
1,80.311,rs647962,0.093  
1,80.571,rs626457,0.168  
1,80.607,rs582317,0.177  
1,80.887,rs595056,0.187  
1,80.907,rs155312,0.129  
1,80.929,rs495875,0.115  
1,80.951,rs17115362,0.112  
1,81.015,rs17115430,0.096  
1,81.019,rs17115445,0.095  
1,81.084,rs2764664,0.082  
1,81.159,rs17422457,0.062  
1,81.335,rs269045,0.033  
1,81.460,rs6686072,0.037  
1,81.510,rs1341318,0.044  
1,81.624,rs6687355,0.052  
1,81.911,rs3131780,0.054  
1,81.955,rs3118027,0.055  
1,81.958,rs7354949,0.055  
1,81.973,rs1886139,0.055  
1,82.191,rs852801,0.044  
1,82.336,rs1188002,0.058  
1,82.341,rs1998739,0.059  
1,82.355,rs6663542,0.058  
1,82.361,rs4110981,0.058  
1,82.372,rs2806403,0.058  
1,82.694,rs639241,0.071  
1,82.735,rs4912316,0.068  
1,82.803,rs12076949,0.063  
1,82.913,rs1318371,0.059

1,82.922,rs11207205,0.058  
1,82.942,rs4912192,0.057  
1,82.997,rs338934,0.045  
1,83.015,rs338919,0.045  
1,83.034,rs338911,0.064  
1,83.043,rs11207224,0.062  
1,83.070,rs849469,0.057  
1,83.142,rs232816,0.053  
1,83.513,rs2811876,0.062  
1,83.553,rs6677589,0.062  
1,83.635,rs11207306,0.065  
1,83.764,rs942124,0.076  
1,83.812,rs9436174,0.077  
1,83.823,rs4601609,0.076  
1,84.020,rs2764914,0.061  
1,84.025,rs6667591,0.061  
1,84.133,rs2764933,0.048  
1,84.424,rs3010325,0.014  
1,84.446,rs2985500,0.013  
1,84.480,rs474103,0.005  
1,84.502,rs162683,0.004  
1,84.525,rs17119061,0.003  
1,84.704,rs7540474,-0.000  
1,84.828,rs6683082,-0.003  
1,85.027,rs835435,-0.014  
1,85.033,rs12563198,-0.010  
1,85.033,rs1188236,-0.010  
1,85.036,rs6692151,-0.025  
1,85.037,rs2798652,-0.026  
1,85.046,rs12732614,-0.024  
1,85.048,rs1890212,-0.042  
1,85.049,rs2897708,-0.043  
1,85.049,rs1004772,-0.041  
1,85.058,rs9436605,-0.043  
1,85.162,rs11800976,-0.061  
1,85.162,rs2807619,-0.061  
1,85.178,rs681128,-0.049  
1,85.273,rs6661520,-0.058  
1,85.286,rs17120400,-0.060  
1,85.319,rs6587879,-0.066  
1,85.361,rs407173,-0.073  
1,85.386,rs10493287,-0.095  
1,85.454,rs6680587,-0.138  
1,85.472,rs496946,-0.149  
1,85.541,rs1381166,-0.152  
1,85.561,rs1461353,-0.151  
1,85.647,rs6661743,-0.140  
1,85.729,rs2211560,-0.128  
1,85.779,rs7516519,-0.122  
1,85.787,rs11808039,-0.122  
1,85.921,rs581503,-0.128  
1,86.085,rs1002005,-0.154  
1,86.104,rs2044548,-0.155  
1,86.132,rs591979,-0.158  
1,86.167,rs2121598,-0.152  
1,86.172,rs662495,-0.151  
1,86.201,rs12062121,-0.146  
1,86.285,rs632853,-0.121  
1,86.305,rs543314,-0.119  
1,86.344,rs1572312,-0.113  
1,86.369,rs2361817,-0.110

1,86.379,rs12030799,-0.109  
1,86.548,rs1283256,-0.096  
1,86.624,rs1779865,-0.091  
1,86.635,rs2173345,-0.090  
1,87.002,rs10493302,-0.071  
1,87.049,rs6693597,-0.070  
1,87.154,rs2008968,-0.067  
1,87.356,rs7540527,-0.068  
1,87.484,rs437021,-0.069  
1,87.521,rs2806426,-0.042  
1,87.567,rs7521242,-0.027  
1,87.598,rs12568891,-0.022  
1,87.632,rs7535730,-0.022  
1,87.655,rs2207792,-0.020  
1,87.671,rs2474364,-0.019  
1,87.678,rs17265852,-0.018  
1,87.706,rs4915745,-0.015  
1,87.761,rs7541526,-0.015  
1,87.784,rs6661015,-0.016  
1,87.815,rs12143476,-0.020  
1,87.844,rs1933293,-0.025  
1,87.879,rs11207801,-0.030  
1,87.882,rs6587943,-0.030  
1,87.886,rs2365465,-0.029  
1,87.941,rs17312971,-0.020  
1,87.963,rs3790580,-0.017  
1,87.988,rs1892022,-0.017  
1,87.992,rs7528744,-0.018  
1,88.010,rs7516332,-0.023  
1,88.060,rs2365498,-0.028  
1,88.060,rs2788616,-0.028  
1,88.087,rs4598521,-0.027  
1,88.111,rs1412622,-0.022  
1,88.141,rs10889271,-0.016  
1,88.302,rs2476194,-0.021  
1,88.335,rs12095754,-0.017  
1,88.370,rs1056517,-0.015  
1,88.372,rs4915802,-0.015  
1,88.406,rs6692004,-0.020  
1,88.450,rs882334,-0.016  
1,88.451,rs7512821,-0.016  
1,88.454,rs4915816,-0.016  
1,88.465,rs2366210,-0.025  
1,88.476,rs4915827,-0.024  
1,88.492,rs3861941,-0.023  
1,88.500,rs12042483,-0.023  
1,88.553,rs10493324,-0.028  
1,88.948,rs10889362,-0.046  
1,89.341,rs7512480,-0.067  
1,89.353,rs2803243,-0.083  
1,89.393,rs7532163,-0.080  
1,89.397,rs2780881,-0.080  
1,89.408,rs2065585,-0.080  
1,89.457,rs12119857,-0.103  
1,89.460,rs4915627,-0.112  
1,89.464,rs10889394,-0.122  
1,89.476,rs2150030,-0.120  
1,89.491,rs17124332,-0.118  
1,89.493,rs1411390,-0.117  
1,89.516,rs6694848,-0.112  
1,89.543,rs1888176,-0.104

1,89.562,rs6679559,-0.099  
1,89.568,rs17318187,-0.100  
1,89.587,rs10889403,-0.104  
1,89.619,rs17390657,-0.112  
1,89.666,rs3887428,-0.111  
1,89.682,rs6588016,-0.107  
1,89.697,rs7515650,-0.104  
1,89.801,rs10493344,-0.087  
1,89.814,rs2031402,-0.085  
1,89.850,rs12024843,-0.088  
1,89.865,rs2235950,-0.090  
1,89.882,rs10489494,-0.092  
1,89.890,rs932748,-0.093  
1,89.910,rs7522426,-0.097  
1,89.917,rs4915896,-0.098  
1,90.236,rs927019,-0.086  
1,90.240,rs2269260,-0.086  
1,90.252,rs10489612,-0.084  
1,90.261,rs2269248,-0.081  
1,90.261,rs17301901,-0.084  
1,90.265,rs2284997,-0.097  
1,90.295,rs855332,-0.085  
1,90.343,rs1354719,-0.073  
1,90.350,rs937805,-0.071  
1,90.480,rs1542805,-0.050  
1,90.511,rs11208297,-0.048  
1,90.602,rs2132161,-0.048  
1,90.665,rs7513180,-0.041  
1,90.903,rs3861946,-0.036  
1,91.282,rs11208351,-0.016  
1,91.288,rs2806541,-0.015  
1,91.301,rs1408417,-0.014  
1,91.336,rs4266926,-0.011  
1,91.356,rs17126249,-0.011  
1,91.408,rs10889476,-0.006  
1,91.448,rs1155542,-0.005  
1,91.470,rs305535,-0.005  
1,91.483,rs12139788,-0.005  
1,91.500,rs2484245,-0.004  
1,91.595,rs305575,-0.000  
1,91.615,rs11808959,-0.000  
1,91.622,rs6686231,-0.001  
1,91.641,rs751666,-0.000  
1,91.647,rs12742304,0.000  
1,91.652,rs3934672,0.000  
1,91.659,rs1926303,0.000  
1,91.775,rs2201689,-0.000  
1,91.830,rs6699614,-0.000  
1,91.889,rs17127415,-0.001  
1,91.893,rs1889926,-0.001  
1,91.983,rs10493374,-0.002  
1,92.066,rs11208645,-0.000  
1,92.084,rs10493377,-0.000  
1,92.272,rs2154380,-0.001  
1,92.414,rs4291477,-0.001  
1,92.453,rs12143459,-0.000  
1,92.514,rs12061146,-0.000  
1,92.538,rs10493388,0.000  
1,92.540,rs10493389,0.000  
1,92.607,rs4329483,0.000  
1,92.634,rs2997091,0.000

1,92.647,rs12568672,0.000  
1,92.673,rs17452121,0.001  
1,92.790,rs6588186,0.003  
1,92.835,rs539322,0.002  
1,92.868,rs17128467,0.000  
1,92.883,rs11208807,0.000  
1,92.926,rs12045279,0.000  
1,92.990,rs12021574,-0.000  
1,93.011,rs519044,-0.000  
1,93.122,rs783036,-0.000  
1,93.247,rs17128891,-0.000  
1,93.278,rs12116697,-0.001  
1,93.313,rs783322,-0.001  
1,93.350,rs1338187,-0.001  
1,93.362,rs2121047,-0.001  
1,93.419,rs4655616,-0.004  
1,93.609,rs6689755,-0.006  
1,93.646,rs6692318,-0.006  
1,93.799,rs502376,-0.006  
1,93.821,rs12727422,-0.008  
1,93.862,rs474409,-0.016  
1,93.865,rs12408354,-0.018  
1,93.934,rs3738168,-0.013  
1,93.937,rs17496172,-0.013  
1,94.024,rs1925400,-0.014  
1,94.422,rs17129664,-0.019  
1,94.453,rs10489631,-0.020  
1,94.662,rs10889675,-0.020  
1,94.716,rs1495965,-0.018  
1,94.757,rs3790558,-0.025  
1,95.004,rs4081356,-0.007  
1,95.038,rs787538,-0.005  
1,95.075,rs805112,-0.005  
1,95.158,rs4655568,-0.008  
1,95.200,rs344934,-0.010  
1,95.460,rs17474654,-0.007  
1,95.611,rs7520899,-0.005  
1,95.801,rs10789253,-0.009  
1,95.829,rs4655768,-0.015  
1,95.999,rs7526959,-0.002  
1,95.999,rs1033973,-0.002  
1,96.027,rs12741473,-0.000  
1,96.028,rs2566762,-0.000  
1,96.032,rs14130,-0.000  
1,96.034,rs2271,-0.000  
1,96.124,rs1367448,-0.001  
1,96.125,rs1864569,-0.001  
1,96.141,rs944082,-0.001  
1,96.141,rs17130546,-0.001  
1,96.173,rs1036067,-0.001  
1,96.182,rs7554551,-0.001  
1,96.363,rs4926355,0.000  
1,96.389,rs10889765,0.000  
1,96.603,rs1924533,-0.003  
1,96.750,rs10889786,-0.003  
1,96.776,rs1492075,-0.006  
1,96.809,rs7541833,-0.005  
1,96.861,rs854273,-0.003  
1,96.941,rs12030971,-0.003  
1,96.948,rs6588344,-0.003  
1,97.019,rs17130868,-0.001

1,97.038,rs11810068,-0.001  
1,97.068,rs1763926,-0.001  
1,97.083,rs12086324,-0.001  
1,97.097,rs2248556,-0.001  
1,97.185,rs2815466,-0.002  
1,97.209,rs12404688,-0.001  
1,97.263,rs10518315,-0.000  
1,97.276,rs12135013,-0.000  
1,97.281,rs1998846,0.000  
1,97.287,rs9326089,0.002  
1,97.315,rs1120087,0.003  
1,97.422,rs1749504,0.003  
1,97.457,rs7515290,0.003  
1,97.485,rs1417438,0.003  
1,97.493,rs1417436,0.004  
1,97.496,rs1740900,0.004  
1,97.507,rs10489555,0.004  
1,97.542,rs1340769,0.005  
1,97.585,rs12028771,0.004  
1,97.659,rs6663915,0.004  
1,97.720,rs12048343,0.003  
1,97.858,rs12048356,0.001  
1,97.961,rs7523188,-0.000  
1,97.990,rs681475,-0.000  
1,98.057,rs6424388,-0.000  
1,98.077,rs9988559,-0.001  
1,98.088,rs2807911,-0.002  
1,98.100,rs1333680,-0.002  
1,98.107,rs17131320,-0.002  
1,98.131,rs10889879,-0.000  
1,98.133,rs2651237,-0.000  
1,98.136,rs617211,0.000  
1,98.167,rs4515743,0.003  
1,98.174,rs4233083,0.004  
1,98.179,rs4146541,0.005  
1,98.180,rs4233084,0.005  
1,98.208,rs7522196,0.007  
1,98.273,rs8179355,0.009  
1,98.308,rs10889884,0.011  
1,98.428,rs12563671,0.017  
1,98.454,rs998550,0.018  
1,98.624,rs4998697,0.037  
1,98.632,rs1409165,0.037  
1,98.644,rs875727,0.037  
1,99.031,rs2796188,0.031  
1,99.210,rs356392,0.030  
1,99.282,rs17091221,0.029  
1,99.292,rs7550923,0.029  
1,99.326,rs1334992,0.029  
1,99.340,rs1041676,0.029  
1,99.352,rs1591382,0.028  
1,99.387,rs6424449,0.023  
1,99.445,rs1486087,0.013  
1,99.451,rs2821267,0.007  
1,99.531,rs7531118,0.011  
1,99.563,rs1445591,0.008  
1,99.571,rs1775367,0.008  
1,99.585,rs4650141,0.007  
1,99.604,rs4650146,0.006  
1,99.629,rs2062664,0.005  
1,99.697,rs4617355,0.003



1,99.759,rs1874731,0.001  
1,99.766,rs1353671,0.001  
1,99.810,rs17094526,0.000  
1,99.870,rs10890101,-0.000  
1,99.883,rs10493535,-0.000  
1,99.997,rs12046751,-0.001  
1,100.124,rs1341573,-0.003  
1,100.171,rs17095501,-0.004  
1,100.182,rs6604872,-0.005  
1,100.183,rs3845348,-0.005  
1,100.215,rs696698,-0.004  
1,100.249,rs12239912,-0.004  
1,100.255,rs10789400,-0.003  
1,100.273,rs2032968,-0.003  
1,100.329,rs2134837,-0.003  
1,100.384,rs4949857,-0.003  
1,100.708,rs623850,-0.008  
1,100.993,rs10874314,-0.008  
1,101.027,rs1571983,-0.008  
1,101.746,rs1251531,-0.008  
1,101.753,rs11162065,-0.008  
1,101.772,rs6593523,-0.008  
1,101.787,rs1370714,-0.008  
1,101.864,rs11803060,-0.005  
1,101.918,rs427589,-0.004  
1,101.982,rs7513539,-0.002  
1,102.005,rs11162094,-0.001  
1,102.123,rs544858,0.000  
1,102.196,rs3884182,0.001  
1,102.200,rs6681765,-0.000  
1,102.211,rs2392030,-0.000  
1,102.267,rs1325287,0.000  
1,102.334,rs6667721,0.000  
1,102.347,rs2147791,-0.000  
1,102.357,rs11162150,-0.000  
1,102.422,rs7413797,0.000  
1,102.479,rs6660107,0.002  
1,102.491,rs315093,0.003  
1,102.493,rs1436087,0.000  
1,102.494,rs4949632,0.003  
1,102.512,rs315084,0.002  
1,102.588,rs315025,0.003  
1,102.590,rs7513970,0.002  
1,102.675,rs484299,0.000  
1,102.780,rs489723,0.000  
1,102.810,rs647890,0.000  
1,102.819,rs651752,-0.000  
1,102.911,rs11577464,-0.000  
1,102.952,rs1004454,0.000  
1,102.955,rs1403243,0.000  
1,102.978,rs9728378,-0.000  
1,103.023,rs10873925,-0.002  
1,103.033,rs199687,-0.003  
1,103.050,rs199707,-0.004  
1,103.068,rs191827,-0.005  
1,103.069,rs199710,-0.005  
1,103.146,rs12131286,-0.007  
1,103.162,rs2799549,-0.007  
1,103.173,rs2689680,-0.007  
1,103.214,rs2054020,-0.007  
1,103.223,rs7546131,-0.007

1,103.333,rs4245660,-0.007  
1,103.347,rs17101276,-0.007  
1,103.364,rs1022103,-0.007  
1,103.438,rs720887,-0.013  
1,103.456,rs2352037,-0.014  
1,103.537,rs674345,-0.023  
1,103.571,rs1412414,-0.027  
1,103.600,rs6701594,-0.033  
1,103.644,rs12080077,-0.045  
1,103.663,rs984107,-0.051  
1,103.683,rs273238,-0.062  
1,103.715,rs273249,-0.099  
1,103.722,rs1333971,-0.109  
1,103.765,rs1751520,-0.137  
1,103.795,rs1937020,-0.164  
1,104.081,rs2635121,-0.236  
1,104.171,rs6424618,-0.261  
1,104.321,rs1571993,-0.274  
1,104.325,rs12097617,-0.274  
1,104.330,rs17102812,-0.284  
1,104.343,rs5008836,-0.287  
1,104.555,rs2201453,-0.338  
1,104.605,rs11162772,-0.340  
1,104.688,rs10874073,-0.332  
1,104.717,rs17425287,-0.330  
1,104.972,rs3001446,-0.303  
1,105.027,rs17104602,-0.275  
1,105.089,rs12563780,-0.283  
1,105.104,rs3909721,-0.285  
1,105.107,rs4650458,-0.328  
1,105.126,rs12118390,-0.329  
1,105.164,rs10493668,-0.333  
1,105.318,rs17399290,-0.349  
1,105.365,rs1279688,-0.356  
1,105.418,rs17105153,-0.361  
1,105.497,rs11163073,-0.374  
1,105.590,rs841666,-0.390  
1,105.657,rs7418088,-0.405  
1,105.763,rs2147085,-0.403  
1,105.885,rs12075367,-0.401  
1,106.128,rs11803328,-0.397  
1,106.169,rs1863618,-0.394  
1,106.185,rs11163179,-0.388  
1,106.208,rs1030414,-0.388  
1,106.226,rs1896176,-0.389  
1,106.239,rs12041774,-0.390  
1,106.494,rs1146418,-0.439  
1,106.575,rs3887577,-0.455  
1,106.696,rs1195854,-0.479  
1,106.817,rs1327609,-0.470  
1,106.841,rs6683338,-0.480  
1,106.857,rs17452799,-0.547  
1,106.867,rs10493689,-0.560  
1,106.903,rs6695272,-0.605  
1,106.927,rs6681688,-0.571  
1,106.956,rs6701355,-0.516  
1,106.990,rs2296234,-0.446  
1,107.026,rs7527341,-0.458  
1,107.090,rs4417125,-0.407  
1,107.113,rs7523717,-0.377  
1,107.146,rs2389165,-0.225

1,107.160,rs561278,-0.191  
1,107.199,rs962249,-0.124  
1,107.400,rs1505550,-0.062  
1,107.415,rs17108037,-0.063  
1,107.442,rs785584,-0.064  
1,107.466,rs12408229,-0.065  
1,107.469,rs2047965,-0.065  
1,107.477,rs1144283,-0.076  
1,107.487,rs1281614,-0.081  
1,107.514,rs1281597,-0.094  
1,107.567,rs10874312,-0.097  
1,107.635,rs318419,-0.087  
1,107.926,rs438697,-0.061  
1,107.932,rs480745,-0.061  
1,107.991,rs1440445,-0.062  
1,108.001,rs1930272,-0.062  
1,108.030,rs6682943,-0.062  
1,108.070,rs12033542,-0.066  
1,108.100,rs1856150,-0.067  
1,108.167,rs4907149,-0.081  
1,108.170,rs4465227,-0.083  
1,108.180,rs4907154,-0.090  
1,108.198,rs12141980,-0.085  
1,108.200,rs10874404,-0.100  
1,108.206,rs12098061,-0.102  
1,108.237,rs6576943,-0.111  
1,108.343,rs12057561,-0.096  
1,108.514,rs599941,-0.125  
1,108.531,rs316689,-0.127  
1,108.549,rs1983077,-0.128  
1,108.552,rs680308,-0.128  
1,108.558,rs316635,-0.129  
1,108.571,rs813056,-0.133  
1,108.622,rs315552,-0.156  
1,108.704,rs11163949,-0.195  
1,108.768,rs6576706,-0.224  
1,108.805,rs1395415,-0.241  
1,108.852,rs11163981,-0.278  
1,108.909,rs186360,-0.284  
1,109.066,rs17367018,-0.299  
1,109.125,rs6687220,-0.304  
1,109.130,rs1340523,-0.305  
1,109.233,rs4471288,-0.292  
1,109.263,rs9659298,-0.327  
1,109.269,rs9701126,-0.327  
1,109.288,rs10782527,-0.326  
1,109.316,rs11161458,-0.310  
1,109.349,rs1359607,-0.291  
1,109.379,rs17116652,-0.285  
1,109.382,rs4907104,-0.284  
1,109.406,rs9730423,-0.281  
1,109.461,rs4907013,-0.263  
1,109.490,rs3738572,-0.272  
1,109.491,rs6681025,-0.303  
1,109.492,rs12057637,-0.303  
1,109.577,rs6691970,-0.427  
1,109.727,rs1542427,-0.487  
1,109.738,rs709767,-0.490  
1,109.813,rs817395,-0.511  
1,109.913,rs12065219,-0.541  
1,109.953,rs17382610,-0.546

1,110.047,rs551140,-0.557  
1,110.079,rs1403956,-0.560  
1,110.084,rs7538364,-0.557  
1,110.097,rs562080,-0.549  
1,110.104,rs3818958,-0.544  
1,110.113,rs10493768,-0.538  
1,110.147,rs1524004,-0.518  
1,110.173,rs12086058,-0.495  
1,110.195,rs7518036,-0.498  
1,110.310,rs1047893,-0.512  
1,110.355,rs313728,-0.509  
1,110.367,rs3753785,-0.510  
1,110.507,rs605060,-0.512  
1,110.543,rs4912453,-0.452  
1,110.566,rs10518362,-0.442  
1,110.594,rs597669,-0.426  
1,110.645,rs1360903,-0.389  
1,110.726,rs1507269,-0.370  
1,110.791,rs7546158,-0.359  
1,110.833,rs1323035,-0.377  
1,110.966,rs2753338,-0.344  
1,110.967,rs1358826,-0.343  
1,111.014,rs2791473,-0.402  
1,111.059,rs772598,-0.405  
1,111.288,rs12142266,-0.376  
1,111.478,rs11161927,-0.385  
1,111.545,rs1199673,-0.388  
1,111.570,rs12136695,-0.395  
1,111.597,rs17454536,-0.403  
1,111.600,rs7556318,-0.407  
1,111.612,rs12563224,-0.463  
1,111.631,rs6690180,-0.478  
1,111.634,rs10873824,-0.478  
1,111.636,rs6576876,-0.478  
1,111.655,rs10747342,-0.483  
1,111.665,rs1330864,-0.462  
1,111.699,rs4119928,-0.420  
1,111.736,rs10873830,-0.384  
1,111.740,rs3766024,-0.381  
1,111.757,rs7518015,-0.369  
1,111.758,rs17129984,-0.369  
1,111.888,rs7349161,-0.405  
1,111.909,rs10873855,-0.393  
1,111.961,rs9433603,-0.350  
1,111.985,rs923545,-0.335  
1,112.006,rs4409623,-0.329  
1,112.014,rs4534351,-0.332  
1,112.111,rs10493801,-0.370  
1,112.130,rs7531638,-0.370  
1,112.150,rs305445,-0.369  
1,112.156,rs1024314,-0.372  
1,112.169,rs305431,-0.380  
1,112.231,rs4655988,-0.376  
1,112.263,rs12750772,-0.378  
1,112.382,rs2503248,-0.385  
1,112.401,rs945058,-0.390  
1,112.482,rs2991716,-0.394  
1,112.549,rs11801253,-0.436  
1,112.606,rs12143926,-0.462  
1,112.685,rs4278350,-0.444  
1,112.706,rs17130256,-0.433

1,112.764,rs1932761,-0.400  
1,112.805,rs2390441,-0.418  
1,112.847,rs6699416,-0.399  
1,112.932,rs525002,-0.392  
1,113.051,rs17130444,-0.377  
1,113.089,rs12039248,-0.374  
1,113.523,rs13376108,-0.382  
1,113.560,rs7532151,-0.382  
1,113.570,rs4393127,-0.381  
1,113.720,rs12408856,-0.357  
1,113.817,rs1410871,-0.333  
1,113.874,rs2077845,-0.335  
1,113.883,rs12131735,-0.334  
1,113.978,rs6428523,-0.335  
1,114.138,rs359920,-0.336  
1,114.153,rs9428043,-0.305  
1,114.215,rs1885745,-0.323  
1,114.233,rs1215512,-0.329  
1,114.321,rs12032393,-0.301  
1,114.410,rs6659997,-0.282  
1,114.423,rs12565034,-0.282  
1,114.435,rs2186184,-0.270  
1,114.449,rs7542239,-0.256  
1,114.506,rs1344059,-0.265  
1,114.522,rs17505638,-0.263  
1,114.555,rs2816893,-0.262  
1,114.628,rs954145,-0.258  
1,114.650,rs12079836,-0.224  
1,114.668,rs2813746,-0.187  
1,114.716,rs6679194,-0.157  
1,114.727,rs7520257,-0.164  
1,114.765,rs4388690,-0.162  
1,114.780,rs4330906,-0.165  
1,114.782,rs4415546,-0.194  
1,114.937,rs10801803,-0.150  
1,115.039,rs578509,-0.118  
1,115.086,rs527402,-0.110  
1,115.189,rs6679215,-0.126  
1,115.210,rs2212940,-0.128  
1,115.215,rs2797293,-0.129  
1,115.263,rs10493842,-0.137  
1,115.309,rs10801825,-0.137  
1,115.346,rs698274,-0.157  
1,115.631,rs354623,-0.158  
1,115.648,rs469846,-0.179  
1,115.649,rs469772,-0.179  
1,115.731,rs347004,-0.183  
1,115.755,rs613176,-0.182  
1,115.759,rs384642,-0.182  
1,115.887,rs10801851,-0.159  
1,116.074,rs3851270,-0.122  
1,116.080,rs12058802,-0.121  
1,116.128,rs13447454,-0.148  
1,116.157,rs963911,-0.137  
1,116.162,rs10874792,-0.135  
1,116.170,rs4658241,-0.129  
1,116.173,rs1041159,-0.128  
1,116.181,rs10874851,-0.120  
1,116.185,rs2148322,-0.116  
1,116.199,rs1805113,-0.102  
1,116.200,rs6665312,-0.105

1,116.205,rs12076549,-0.124  
1,116.237,rs1805110,-0.149  
1,116.245,rs6680614,-0.156  
1,116.270,rs10747493,-0.161  
1,116.297,rs11166141,-0.164  
1,116.928,rs11164855,-0.125  
1,116.974,rs2249590,-0.122  
1,117.275,rs7339890,-0.117  
1,117.393,rs236316,-0.132  
1,117.463,rs236285,-0.133  
1,117.487,rs907784,-0.138  
1,117.498,rs12022530,-0.140  
1,117.506,rs4847183,-0.140  
1,117.634,rs2235970,-0.177  
1,117.640,rs10489605,-0.179  
1,117.719,rs1889547,-0.228  
1,117.731,rs3789375,-0.231  
1,117.760,rs1320502,-0.219  
1,117.761,rs1889548,-0.217  
1,117.777,rs497511,-0.192  
1,117.787,rs4612636,-0.187  
1,117.789,rs12759306,-0.187  
1,117.805,rs952499,-0.194  
1,117.808,rs4147825,-0.194  
1,117.824,rs10782976,-0.245  
1,117.847,rs871664,-0.284  
1,117.848,rs2774920,-0.284  
1,117.991,rs12027548,-0.267  
1,117.994,rs11584317,-0.266  
1,118.145,rs582798,-0.295  
1,118.165,rs696619,-0.299  
1,118.215,rs1772895,-0.355  
1,118.220,rs1245489,-0.401  
1,118.235,rs12725602,-0.465  
1,118.255,rs1245480,-0.500  
1,118.275,rs7513758,-0.503  
1,118.290,rs12120217,-0.503  
1,118.353,rs2391423,-0.460  
1,118.399,rs915012,-0.515  
1,118.417,rs696620,-0.480  
1,118.436,rs7531174,-0.490  
1,118.441,rs698953,-0.496  
1,118.454,rs859063,-0.517  
1,118.500,rs1146460,-0.523  
1,118.539,rs2391391,-0.502  
1,118.557,rs11165285,-0.494  
1,118.693,rs2148796,-0.503  
1,118.754,rs2039614,-0.511  
1,118.830,rs11165406,-0.513  
1,118.872,rs6692957,-0.513  
1,118.945,rs880686,-0.487  
1,118.967,rs12142219,-0.507  
1,118.969,rs7554994,-0.508  
1,118.980,rs6678734,-0.510  
1,119.015,rs4245671,-0.490  
1,119.037,rs2051029,-0.495  
1,119.125,rs6682297,-0.519  
1,119.164,rs1402807,-0.587  
1,119.206,rs321556,-0.556  
1,119.217,rs321588,-0.560  
1,119.328,rs6677110,-0.534

1,119.377,rs6673531,-0.516  
1,119.479,rs6701736,-0.482  
1,119.516,rs4950016,-0.462  
1,119.556,rs182358,-0.450  
1,119.559,rs290821,-0.449  
1,119.608,rs11165779,-0.403  
1,119.651,rs6681743,-0.344  
1,119.662,rs6593639,-0.341  
1,119.683,rs12758854,-0.360  
1,119.686,rs4950025,-0.355  
1,119.731,rs9782950,-0.338  
1,119.734,rs12044858,-0.339  
1,119.764,rs12725266,-0.368  
1,119.775,rs4950033,-0.374  
1,119.776,rs17116720,-0.374  
1,119.785,rs1415681,-0.374  
1,119.814,rs4520446,-0.364  
1,119.842,rs17100624,-0.374  
1,119.857,rs2811205,-0.375  
1,119.913,rs10875102,-0.380  
1,120.297,rs9662365,-0.416  
1,120.606,rs12724493,-0.460  
1,120.622,rs11165975,-0.486  
1,120.624,rs822607,-0.489  
1,120.638,rs12120750,-0.477  
1,120.651,rs1323727,-0.486  
1,120.659,rs1328310,-0.491  
1,120.676,rs728656,-0.491  
1,120.718,rs3853696,-0.535  
1,120.722,rs3867319,-0.543  
1,120.813,rs4351664,-0.711  
1,120.828,rs6702126,-0.783  
1,120.832,rs992708,-0.785  
1,120.907,rs2046178,-0.843  
1,121.140,rs12411241,-0.769  
1,121.306,rs12075686,-0.665  
1,121.646,rs12083740,-0.577  
1,121.722,rs2148154,-0.559  
1,121.729,rs1325957,-0.557  
1,121.814,rs1419059,-0.531  
1,121.815,rs6695717,-0.531  
1,121.843,rs17120526,-0.530  
1,121.857,rs2027358,-0.529  
1,121.892,rs1339866,-0.529  
1,121.907,rs952519,-0.480  
1,121.937,rs12729121,-0.451  
1,121.945,rs844330,-0.451  
1,121.956,rs17405754,-0.444  
1,121.976,rs10783115,-0.438  
1,121.979,rs12035402,-0.437  
1,122.107,rs2307130,-0.408  
1,122.411,rs4579779,-0.367  
1,122.454,rs864633,-0.359  
1,122.605,rs2809823,-0.372  
1,122.634,rs11581062,-0.337  
1,122.719,rs10875355,-0.375  
1,122.731,rs12407211,-0.342  
1,122.735,rs6676516,-0.344  
1,122.742,rs12407294,-0.354  
1,122.745,rs12409786,-0.354  
1,122.755,rs6693660,-0.354

1,122.763,rs6577233,-0.355  
1,122.875,rs7541500,-0.385  
1,122.890,rs6577244,-0.388  
1,122.911,rs12041998,-0.394  
1,123.114,rs450404,-0.439  
1,123.282,rs7541801,-0.396  
1,123.407,rs4908170,-0.398  
1,123.624,rs7529743,-0.412  
1,123.678,rs11164282,-0.427  
1,123.786,rs2218476,-0.455  
1,123.835,rs716222,-0.435  
1,123.893,rs4908185,-0.426  
1,123.898,rs1445225,-0.499  
1,123.925,rs10493973,-0.549  
1,123.929,rs2039943,-0.556  
1,124.001,rs2050572,-0.520  
1,124.025,rs11802288,-0.490  
1,124.031,rs1932850,-0.482  
1,124.033,rs10493966,-0.480  
1,124.041,rs7529987,-0.492  
1,124.053,rs6684718,-0.507  
1,124.060,rs2022858,-0.502  
1,124.063,rs6679483,-0.501  
1,124.076,rs6577309,-0.501  
1,124.080,rs2889234,-0.496  
1,124.091,rs12061042,-0.471  
1,124.092,rs1341910,-0.469  
1,124.108,rs3916220,-0.445  
1,124.128,rs1878510,-0.432  
1,124.129,rs11164556,-0.431  
1,124.162,rs1241202,-0.414  
1,124.207,rs6692914,-0.409  
1,124.208,rs11586335,-0.409  
1,124.229,rs12751561,-0.405  
1,124.230,rs1406135,-0.405  
1,124.560,rs2208963,-0.351  
1,124.908,rs11185392,-0.375  
1,124.951,rs1928321,-0.372  
1,124.993,rs12406661,-0.369  
1,125.158,rs10494011,-0.355  
1,125.247,rs2594664,-0.347  
1,125.258,rs7418397,-0.346  
1,125.270,rs7411648,-0.344  
1,125.361,rs6695172,-0.320  
1,125.463,rs12036108,-0.298  
1,125.470,rs958515,-0.297  
1,125.508,rs7543757,-0.258  
1,125.569,rs2317613,-0.249  
1,125.596,rs11184300,-0.246  
1,125.606,rs716419,-0.245  
1,125.711,rs7411085,-0.233  
1,126.133,rs12030832,-0.165  
1,126.185,rs6700732,-0.179  
1,126.202,rs12565217,-0.176  
1,126.313,rs2501603,-0.155  
1,126.323,rs1524108,-0.133  
1,126.338,rs11184596,-0.132  
1,126.592,rs17016501,-0.115  
1,126.602,rs1380289,-0.114  
1,126.662,rs11184726,-0.119  
1,126.687,rs480255,-0.118



1,126.709,rs10494035,-0.121  
1,126.714,rs11184747,-0.121  
1,126.730,rs12046537,-0.126  
1,126.732,rs4915122,-0.127  
1,126.827,rs12752606,-0.126  
1,126.885,rs12567271,-0.125  
1,126.929,rs10494046,-0.125  
1,126.951,rs17017331,-0.125  
1,126.955,rs12023595,-0.125  
1,127.113,rs1519887,-0.133  
1,127.196,rs12137571,-0.124  
1,127.220,rs4304614,-0.126  
1,127.252,rs6704278,-0.125  
1,127.257,rs4641328,-0.106  
1,127.359,rs2232016,-0.088  
1,127.433,rs6583007,-0.077  
1,127.459,rs4364907,-0.064  
1,127.465,rs10494061,-0.048  
1,127.576,rs3123376,-0.071  
1,127.581,rs10494067,-0.073  
1,127.594,rs10494068,-0.079  
1,127.615,rs7411507,-0.085  
1,127.631,rs12066815,-0.083  
1,127.637,rs7555385,-0.085  
1,127.666,rs6662274,-0.107  
1,127.676,rs6681988,-0.108  
1,127.677,rs7466603,-0.112  
1,127.682,rs2587895,-0.134  
1,127.767,rs597332,-0.142  
1,127.803,rs11185125,-0.142  
1,127.815,rs525007,-0.141  
1,127.820,rs666003,-0.140  
1,127.853,rs8676,-0.119  
1,127.875,rs7537311,-0.120  
1,127.909,rs6583034,-0.118  
1,127.938,rs7543435,-0.115  
1,127.941,rs12064875,-0.134  
1,127.980,rs2494067,-0.124  
1,127.999,rs2494043,-0.127  
1,128.028,rs4531312,-0.132  
1,128.061,rs12116592,-0.137  
1,128.086,rs12126655,-0.132  
1,128.152,rs345292,-0.100  
1,128.193,rs345306,-0.102  
1,128.209,rs17020437,-0.103  
1,128.250,rs1350629,-0.106  
1,128.272,rs12039210,-0.103  
1,128.361,rs11185266,-0.099  
1,128.371,rs12742113,-0.099  
1,128.460,rs828999,-0.109  
1,128.598,rs11185318,-0.114  
1,128.603,rs17574954,-0.114  
1,128.881,rs12039852,-0.131  
1,128.960,rs970860,-0.134  
1,129.016,rs10776714,-0.134  
1,129.143,rs914807,-0.132  
1,129.155,rs11582005,-0.133  
1,129.261,rs10494097,-0.142  
1,129.284,rs1277213,-0.159  
1,129.299,rs7551421,-0.170  
1,129.354,rs2131905,-0.169

1,129.478,rs865151,-0.167  
1,129.489,rs12403481,-0.165  
1,129.514,rs11102735,-0.162  
1,129.747,rs587727,-0.135  
1,129.773,rs17641977,-0.146  
1,129.788,rs17014495,-0.152  
1,129.818,rs659543,-0.152  
1,129.865,rs3120625,-0.132  
1,129.916,rs4970833,-0.111  
1,129.939,rs17035949,-0.127  
1,129.942,rs14000,-0.129  
1,130.387,rs2301230,-0.117  
1,130.434,rs865774,-0.115  
1,130.443,rs7544426,-0.114  
1,130.619,rs2094469,-0.072  
1,130.620,rs3818562,-0.072  
1,130.630,rs943640,-0.088  
1,130.666,rs7524737,-0.093  
1,130.670,rs4970781,-0.078  
1,130.713,rs484959,-0.091  
1,130.722,rs12563382,-0.114  
1,130.750,rs12566133,-0.101  
1,130.796,rs1021880,-0.070  
1,130.806,rs433192,-0.065  
1,130.813,rs333958,-0.062  
1,130.833,rs1999713,-0.063  
1,130.835,rs333951,-0.050  
1,130.856,rs333970,-0.063  
1,130.893,rs7365459,-0.077  
1,130.978,rs4838931,-0.132  
1,131.085,rs2011688,-0.115  
1,131.199,rs615204,-0.098  
1,131.238,rs958798,-0.108  
1,131.403,rs1323723,-0.078  
1,131.525,rs497451,-0.075  
1,131.837,rs2271885,-0.124  
1,131.959,rs6674775,-0.147  
1,132.115,rs1418747,-0.220  
1,132.133,rs343614,-0.213  
1,132.198,rs7521468,-0.172  
1,132.216,rs1418426,-0.170  
1,132.234,rs1149185,-0.176  
1,132.263,rs1282129,-0.190  
1,132.301,rs2820063,-0.248  
1,132.312,rs2783442,-0.266  
1,132.315,rs654997,-0.268  
1,132.320,rs2274232,-0.270  
1,132.326,rs17699274,-0.268  
1,132.387,rs12047673,-0.237  
1,132.411,rs3806448,-0.224  
1,132.468,rs12127313,-0.234  
1,132.508,rs10776724,-0.219  
1,132.604,rs17027501,-0.173  
1,132.623,rs961558,-0.164  
1,132.739,rs2485319,-0.136  
1,132.920,rs1361135,-0.182  
1,133.051,rs12028677,-0.157  
1,133.058,rs2798565,-0.157  
1,133.072,rs2789535,-0.157  
1,133.166,rs10776733,-0.148  
1,133.244,rs7516113,-0.139

1,133.252,rs2800880,-0.138  
1,133.371,rs3903904,-0.130  
1,133.541,rs3738298,-0.119  
1,133.546,rs1246194,-0.119  
1,133.547,rs475620,-0.119  
1,133.561,rs17028610,-0.132  
1,133.569,rs641724,-0.143  
1,133.627,rs7513810,-0.130  
1,133.628,rs12139985,-0.130  
1,133.630,rs1891716,-0.130  
1,133.651,rs12080989,-0.138  
1,133.665,rs1036959,-0.141  
1,133.675,rs9429608,-0.174  
1,133.690,rs1936061,-0.185  
1,133.695,rs9429425,-0.174  
1,133.704,rs9429614,-0.155  
1,133.714,rs6703437,-0.167  
1,133.720,rs4839193,-0.172  
1,133.733,rs1373286,-0.157  
1,133.759,rs10745323,-0.127  
1,133.827,rs10776740,-0.139  
1,133.830,rs269131,-0.139  
1,133.906,rs155648,-0.128  
1,133.932,rs10745326,-0.105  
1,133.990,rs6537730,-0.101  
1,134.074,rs17029987,-0.094  
1,134.225,rs2153995,-0.093  
1,134.280,rs1343274,-0.097  
1,134.502,rs2488778,-0.128  
1,134.572,rs2492493,-0.133  
1,134.599,rs2492497,-0.135  
1,134.747,rs1777610,-0.140  
1,135.279,rs351359,-0.156  
1,135.380,rs3790609,-0.176  
1,135.408,rs3006988,-0.184  
1,135.457,rs10494164,-0.188  
1,135.644,rs4462141,-0.211  
1,135.663,rs2432,-0.207  
1,135.666,rs901146,-0.206  
1,135.708,rs611514,-0.197  
1,135.713,rs2629812,-0.199  
1,135.740,rs12027243,-0.195  
1,135.749,rs7546417,-0.192  
1,135.769,rs476567,-0.216  
1,135.774,rs537478,-0.192  
1,135.793,rs2774298,-0.168  
1,135.871,rs631230,-0.168  
1,135.880,rs209876,-0.167  
1,135.906,rs1158366,-0.171  
1,135.921,rs430928,-0.171  
1,135.951,rs11586444,-0.169  
1,136.049,rs416908,-0.155  
1,136.149,rs714569,-0.120  
1,136.213,rs668800,-0.108  
1,136.257,rs486755,-0.113  
1,136.746,rs926938,-0.062  
1,136.838,rs3126219,-0.057  
1,137.048,rs1321106,-0.039  
1,137.082,rs17479518,-0.040  
1,137.107,rs12138359,-0.041  
1,137.171,rs1146179,-0.045

1,137.180,rs2798464,-0.045  
1,137.202,rs12033518,-0.045  
1,137.221,rs2068797,-0.045  
1,137.242,rs12058927,-0.047  
1,137.265,rs4320778,-0.048  
1,137.271,rs10776801,-0.047  
1,137.281,rs11102933,-0.045  
1,137.368,rs2334915,-0.019  
1,137.389,rs6696763,-0.021  
1,137.543,rs4240548,-0.045  
1,137.571,rs3010382,-0.046  
1,137.579,rs10923142,-0.048  
1,137.595,rs4571967,-0.051  
1,137.629,rs4423004,-0.046  
1,137.761,rs10754377,-0.034  
1,137.819,rs2131440,-0.038  
1,138.011,rs17035127,-0.028  
1,138.232,rs10802162,-0.018  
1,138.280,rs10489749,-0.005  
1,138.281,rs2208363,-0.005  
1,138.424,rs10924021,-0.005  
1,138.535,rs4839534,-0.006  
1,138.614,rs7552721,-0.005  
1,138.806,rs17575616,-0.005  
1,138.834,rs4839541,-0.003  
1,138.847,rs4839073,-0.004  
1,138.956,rs1414272,-0.005  
1,138.961,rs6703791,-0.005  
1,139.037,rs599563,-0.000  
1,139.080,rs624988,0.000  
1,139.089,rs614448,0.000  
1,139.118,rs798037,0.000  
1,139.393,rs10923158,-0.000  
1,139.451,rs2182605,-0.000  
1,139.478,rs17036591,-0.002  
1,139.479,rs11583252,-0.002  
1,139.538,rs4128518,-0.002  
1,139.587,rs12096164,-0.001  
1,139.591,rs17036665,-0.001  
1,139.616,rs1289655,-0.001  
1,139.635,rs7546885,-0.000  
1,139.661,rs2066398,0.000  
1,139.670,rs6428686,0.000  
1,139.700,rs10923228,0.000  
1,139.721,rs6692758,0.000  
1,139.757,rs12035668,-0.001  
1,139.760,rs2137400,-0.001  
1,139.762,rs7536105,-0.001  
1,139.782,rs873975,-0.002  
1,140.119,rs7554803,-0.000  
1,140.139,rs6428738,-0.000  
1,140.191,rs1885012,0.000  
1,140.216,rs10489732,0.000  
1,140.260,rs1146337,0.000  
1,140.285,rs1146320,0.000  
1,140.407,rs7542082,0.001  
1,140.445,rs1213852,0.001  
1,140.692,rs12742627,0.003  
1,140.700,rs2645303,0.003  
1,140.732,rs4387216,0.004  
1,140.758,rs17023344,0.006

1,140.761,rs12730226,0.007  
1,140.762,rs1341797,0.006  
1,140.767,rs12757996,0.006  
1,140.771,rs1539188,0.006  
1,140.773,rs17023386,0.006  
1,140.781,rs6695549,0.001  
1,140.788,rs838534,0.001  
1,140.794,rs7514283,0.000  
1,140.839,rs7546652,-0.001  
1,140.894,rs7547046,-0.001  
1,141.023,rs12139088,-0.003  
1,141.025,rs10754417,-0.003  
1,141.026,rs496886,-0.003  
1,141.028,rs12030925,-0.003  
1,141.029,rs942835,-0.001  
1,141.030,rs517237,-0.000  
1,141.032,rs1052972,-0.000  
1,141.033,rs4659238,0.000  
1,141.038,rs17258579,0.000  
1,141.069,rs6683357,-0.002  
1,142.090,rs10797649,0.000  
1,142.457,rs647596,0.000  
1,142.597,rs1348316,0.000  
1,142.661,rs2354432,0.000  
1,142.965,rs4950437,0.003  
1,143.077,rs10900376,0.006  
1,143.228,rs3766509,0.007  
1,143.239,rs2185437,0.008  
1,143.251,rs10494246,0.007  
1,143.336,rs2352867,0.005  
1,143.387,rs4268399,0.006  
1,143.501,rs10900403,0.016  
1,143.547,rs7541950,0.020  
1,144.079,rs2992453,0.018  
1,144.099,rs12561867,0.018  
1,144.130,rs515565,0.019  
1,145.521,rs11205277,0.080  
1,145.604,rs12063329,0.112  
1,145.812,rs509345,0.139  
1,145.885,rs11582094,0.147  
1,146.013,rs4971044,0.161  
1,146.065,rs11204684,0.164  
1,146.361,rs3820539,0.210  
1,146.442,rs4971004,0.221  
1,146.582,rs1056847,0.242  
1,146.627,rs1752380,0.217  
1,146.711,rs11204828,0.192  
1,146.752,rs3811411,0.189  
1,146.755,rs12121608,0.188  
1,146.824,rs1196348,0.160  
1,146.888,rs868360,0.135  
1,146.921,rs8480,0.122  
1,146.958,rs12045886,0.115  
1,146.964,rs7540530,0.136  
1,146.984,rs9645406,0.136  
1,147.055,rs1038745,0.150  
1,147.100,rs1131471,0.160  
1,147.133,rs1552991,0.120  
1,147.265,rs6587673,0.134  
1,147.316,rs6662637,0.117  
1,147.333,rs4845792,0.132

1,147.336,rs7516108,0.131  
1,147.531,rs1332506,0.148  
1,147.701,rs1854779,0.165  
1,147.742,rs11576457,0.163  
1,147.781,rs7541720,0.162  
1,147.938,rs381115,0.155  
1,148.014,rs1831238,0.149  
1,148.016,rs4845528,0.149  
1,148.035,rs7519359,0.128  
1,148.067,rs1926234,0.136  
1,148.150,rs2916229,0.149  
1,148.188,rs3014866,0.150  
1,148.195,rs1560832,0.132  
1,148.198,rs3014875,0.123  
1,148.224,rs3006488,0.124  
1,148.267,rs3014824,0.132  
1,148.299,rs12132927,0.138  
1,148.301,rs11205297,0.139  
1,148.384,rs3795393,0.155  
1,148.595,rs4845568,0.177  
1,148.600,rs11264336,0.178  
1,148.613,rs6427268,0.180  
1,148.673,rs1127091,0.180  
1,149.041,rs4459102,0.168  
1,149.328,rs1194596,0.170  
1,149.476,rs6688376,0.202  
1,149.527,rs10908835,0.207  
1,149.632,rs4537545,0.215  
1,149.651,rs11265618,0.216  
1,149.736,rs11577167,0.217  
1,149.909,rs6699825,0.220  
1,150.093,rs4845663,0.205  
1,150.095,rs11264250,0.205  
1,150.104,rs3738028,0.204  
1,150.108,rs10494301,0.229  
1,150.114,rs925042,0.220  
1,150.125,rs10908429,0.238  
1,150.127,rs6697935,0.207  
1,150.140,rs906281,0.211  
1,150.156,rs10908435,0.214  
1,150.192,rs7532286,0.236  
1,150.199,rs4845671,0.247  
1,150.218,rs11577297,0.260  
1,150.225,rs954785,0.292  
1,150.244,rs7512194,0.293  
1,150.252,rs2335406,0.292  
1,150.253,rs1106235,0.263  
1,150.256,rs10796933,0.303  
1,150.292,rs1218578,0.245  
1,150.323,rs4845396,0.234  
1,150.446,rs1891805,0.240  
1,150.523,rs6673081,0.220  
1,150.541,rs4845406,0.222  
1,150.565,rs3806256,0.207  
1,150.656,rs4460629,0.211  
1,151.343,rs625658,0.214  
1,151.529,rs2485662,0.204  
1,151.592,rs1984508,0.210  
1,151.685,rs1052053,0.211  
1,151.749,rs933489,0.250  
1,151.950,rs2985714,0.288

1,151.952,rs7525133,0.288  
1,151.996,rs7551218,0.305  
1,152.053,rs7548323,0.294  
1,152.077,rs4414033,0.289  
1,152.436,rs12567958,0.206  
1,152.513,rs4661210,0.200  
1,152.567,rs12759184,0.177  
1,152.568,rs4402117,0.177  
1,152.576,rs11264527,0.177  
1,152.582,rs11264528,0.179  
1,152.618,rs11811735,0.164  
1,152.780,rs2644608,0.207  
1,152.847,rs4661229,0.208  
1,152.877,rs4661063,0.190  
1,152.918,rs6334,0.167  
1,153.019,rs945508,0.152  
1,153.037,rs12138039,0.150  
1,153.309,rs7519739,0.123  
1,153.316,rs946577,0.123  
1,153.424,rs6675916,0.119  
1,153.540,rs10494310,0.110  
1,153.973,rs2147445,0.123  
1,154.128,rs3845580,0.128  
1,154.155,rs12565640,0.129  
1,154.187,rs4246538,0.135  
1,154.282,rs11264737,0.169  
1,154.287,rs1412329,0.168  
1,154.298,rs7340113,0.142  
1,154.303,rs3900770,0.144  
1,154.314,rs1972240,0.147  
1,154.389,rs7522061,0.165  
1,154.481,rs4614251,0.180  
1,154.527,rs1217058,0.197  
1,154.613,rs6698985,0.200  
1,154.623,rs1888821,0.200  
1,154.645,rs1925034,0.202  
1,154.673,rs7537784,0.206  
1,154.830,rs7527735,0.230  
1,154.878,rs4971191,0.203  
1,154.889,rs1886389,0.203  
1,154.963,rs6695790,0.171  
1,155.055,rs12088518,0.177  
1,155.418,rs692565,0.174  
1,155.882,rs12033535,0.178  
1,156.070,rs1065457,0.176  
1,156.091,rs12139388,0.173  
1,156.125,rs17673153,0.168  
1,156.128,rs10489828,0.168  
1,156.206,rs1418846,0.160  
1,156.256,rs863367,0.151  
1,156.368,rs2435282,0.133  
1,156.394,rs2325696,0.136  
1,156.399,rs857838,0.137  
1,156.417,rs857863,0.134  
1,156.424,rs857788,0.132  
1,156.459,rs2188114,0.125  
1,156.631,rs2106096,0.116  
1,156.668,rs11805756,0.113  
1,156.727,rs2820187,0.107  
1,157.046,rs1361567,0.068  
1,157.299,rs12094741,0.098

1,157.522,rs2814774,0.079  
1,157.528,rs965359,0.079  
1,157.568,rs12075,0.077  
1,157.617,rs3845624,0.075  
1,157.735,rs4443888,0.077  
1,158.051,rs984553,0.082  
1,158.085,rs12076827,0.084  
1,158.112,rs2592887,0.087  
1,158.115,rs726640,0.071  
1,158.181,rs11265265,0.090  
1,158.198,rs11265269,0.092  
1,158.221,rs3806185,0.065  
1,158.226,rs4403628,0.058  
1,158.233,rs6662918,0.047  
1,158.236,rs11584887,0.043  
1,158.240,rs4630124,0.041  
1,158.278,rs2494523,0.036  
1,158.300,rs2501346,0.033  
1,158.301,rs5010834,0.032  
1,158.302,rs4133290,0.044  
1,158.330,rs7521729,0.033  
1,158.368,rs2494481,0.026  
1,158.381,rs2252815,0.022  
1,158.403,rs4262538,0.024  
1,158.409,rs1316275,0.024  
1,158.425,rs2789426,0.027  
1,158.431,rs7521490,0.028  
1,158.441,rs4378200,0.029  
1,158.478,rs11809878,0.033  
1,158.482,rs2211107,0.033  
1,158.593,rs10908753,0.049  
1,158.602,rs4656879,0.046  
1,158.637,rs12753283,0.038  
1,158.654,rs4656888,0.033  
1,158.664,rs4656889,0.048  
1,158.672,rs11265343,0.042  
1,158.680,rs1935306,0.041  
1,158.751,rs6683177,0.042  
1,158.821,rs2066320,0.043  
1,158.870,rs16831846,0.044  
1,158.887,rs4656902,0.045  
1,158.931,rs7513382,0.047  
1,158.935,rs12090877,0.047  
1,158.966,rs10494343,0.046  
1,158.995,rs4656264,0.045  
1,159.216,rs6692382,0.025  
1,159.333,rs164288,0.019  
1,159.350,rs3766364,0.018  
1,159.390,rs11265461,0.023  
1,159.438,rs10489636,0.013  
1,159.440,rs10489637,0.013  
1,159.499,rs10489639,0.012  
1,159.515,rs352692,0.011  
1,159.521,rs184772,0.011  
1,159.755,rs485618,0.008  
1,159.768,rs10158850,0.007  
1,159.776,rs512525,0.007  
1,159.951,rs4656971,0.005  
1,159.961,rs16832570,0.005  
1,160.086,rs11576837,0.003  
1,160.153,rs4559524,0.007



1,160.412,rs2501873,0.002  
1,160.527,rs6427588,0.002  
1,160.702,rs12745664,0.003  
1,160.751,rs10157070,0.003  
1,160.863,rs4657039,0.002  
1,161.201,rs1832739,0.005  
1,161.236,rs17413333,0.011  
1,161.241,rs12135523,0.011  
1,161.270,rs12079477,0.008  
1,161.301,rs1027702,0.006  
1,162.205,rs6673329,0.006  
1,162.222,rs2684874,0.006  
1,162.349,rs1912453,0.008  
1,162.569,rs12031354,0.007  
1,162.635,rs12045181,0.008  
1,162.637,rs10799880,0.008  
1,162.715,rs2343503,0.009  
1,162.737,rs12093487,0.009  
1,162.753,rs6427699,0.009  
1,162.827,rs6664865,0.009  
1,163.085,rs2841966,0.010  
1,163.489,rs951437,0.008  
1,163.655,rs2661303,0.006  
1,163.704,rs10799899,0.005  
1,164.042,rs2815284,0.001  
1,164.167,rs10799902,-0.000  
1,164.322,rs1509019,-0.000  
1,164.710,rs16852030,-0.000  
1,164.865,rs2136241,-0.000  
1,165.086,rs1396544,0.002  
1,165.161,rs4475722,0.008  
1,165.238,rs3010348,0.008  
1,165.380,rs12047638,0.012  
1,165.556,rs3001080,0.019  
1,165.574,rs2211183,0.022  
1,165.592,rs4657294,0.029  
1,165.605,rs10799928,0.024  
1,165.615,rs1934497,0.021  
1,165.616,rs2820871,0.042  
1,165.638,rs2486834,0.049  
1,165.696,rs6671591,0.061  
1,165.732,rs10494395,0.057  
1,166.008,rs781936,0.058  
1,166.012,rs11582225,0.058  
1,166.098,rs1444445,0.075  
1,166.102,rs1122279,0.075  
1,166.166,rs10917897,0.063  
1,166.222,rs10917931,0.050  
1,166.238,rs10737498,0.050  
1,166.371,rs559021,0.049  
1,166.454,rs1416436,0.049  
1,166.512,rs2788526,0.061  
1,166.535,rs11806933,0.063  
1,166.578,rs3945008,0.080  
1,166.606,rs17385225,0.092  
1,166.612,rs6662422,0.093  
1,166.615,rs1954114,0.094  
1,166.629,rs12402920,0.097  
1,166.634,rs946253,0.098  
1,166.643,rs1340519,0.099  
1,166.652,rs10918034,0.103

1,166.678,rs2275560,0.117  
1,166.712,rs1780365,0.137  
1,166.744,rs2800787,0.132  
1,166.762,rs10494418,0.134  
1,166.781,rs1618566,0.159  
1,166.805,rs2792248,0.167  
1,166.835,rs1892174,0.154  
1,166.846,rs1780361,0.164  
1,166.847,rs1552560,0.165  
1,166.851,rs1686195,0.158  
1,166.860,rs2171692,0.142  
1,166.908,rs1780330,0.165  
1,166.931,rs10918063,0.177  
1,166.950,rs2789444,0.189  
1,166.954,rs7521521,0.189  
1,166.958,rs12098218,0.189  
1,166.969,rs6686727,0.188  
1,167.075,rs1890535,0.173  
1,167.084,rs10494426,0.170  
1,167.128,rs7512483,0.155  
1,167.198,rs12049436,0.153  
1,167.202,rs12119600,0.154  
1,167.206,rs6663388,0.156  
1,167.207,rs2881832,0.157  
1,167.214,rs4656427,0.160  
1,167.232,rs10918123,0.158  
1,167.246,rs4657406,0.162  
1,167.251,rs2348247,0.168  
1,167.275,rs6671290,0.175  
1,167.277,rs6703000,0.177  
1,167.281,rs10737508,0.175  
1,167.286,rs10494436,0.150  
1,167.362,rs1807798,0.121  
1,167.437,rs1504698,0.117  
1,167.442,rs875822,0.117  
1,167.452,rs10800084,0.117  
1,167.546,rs3845535,0.112  
1,167.620,rs16844019,0.108  
1,167.630,rs283690,0.107  
1,167.643,rs283695,0.106  
1,167.655,rs12069160,0.107  
1,167.760,rs17430865,0.119  
1,167.803,rs10918196,0.124  
1,167.855,rs12084656,0.128  
1,168.084,rs2252583,0.126  
1,168.340,rs4147592,0.120  
1,168.360,rs10800120,0.118  
1,168.542,rs1337442,0.103  
1,168.639,rs2090281,0.108  
1,168.834,rs7411708,0.125  
1,169.074,rs2153264,0.128  
1,169.169,rs6677965,0.142  
1,169.221,rs6426942,0.151  
1,169.361,rs3762365,0.213  
1,169.425,rs12063037,0.234  
1,169.440,rs2349106,0.238  
1,169.445,rs12026896,0.238  
1,169.515,rs732285,0.265  
1,169.547,rs12040476,0.279  
1,169.610,rs3856211,0.306  
1,169.680,rs4074897,0.372

1,169.686,rs4542197,0.341  
1,169.694,rs4657543,0.339  
1,169.776,rs7549089,0.340  
1,169.813,rs7544608,0.366  
1,169.842,rs10753736,0.299  
1,169.854,rs12096958,0.297  
1,169.921,rs7516525,0.285  
1,170.193,rs563244,0.240  
1,170.234,rs480820,0.233  
1,170.269,rs2064067,0.238  
1,170.530,rs10918607,0.261  
1,170.615,rs6698931,0.259  
1,170.632,rs4657625,0.256  
1,170.668,rs10918621,0.253  
1,170.729,rs267741,0.260  
1,170.737,rs2281959,0.262  
1,170.744,rs11806848,0.264  
1,170.800,rs6663682,0.256  
1,170.802,rs6691080,0.228  
1,170.825,rs9803659,0.226  
1,171.195,rs2258497,0.169  
1,171.206,rs1554669,0.167  
1,171.229,rs10918693,0.162  
1,171.231,rs1723015,0.161  
1,171.255,rs1214609,0.181  
1,171.263,rs858553,0.176  
1,171.276,rs6670426,0.202  
1,171.283,rs704853,0.226  
1,171.296,rs2982484,0.275  
1,171.327,rs1737498,0.265  
1,171.331,rs858492,0.263  
1,171.332,rs858490,0.280  
1,171.368,rs1737481,0.350  
1,171.416,rs767707,0.472  
1,171.488,rs1229387,0.506  
1,171.490,rs4657692,0.507  
1,171.505,rs12067995,0.489  
1,171.519,rs1229377,0.471  
1,171.533,rs1229355,0.474  
1,171.580,rs2862866,0.462  
1,171.676,rs4472738,0.426  
1,171.733,rs3213588,0.427  
1,171.758,rs12407873,0.428  
1,171.789,rs203795,0.407  
1,171.801,rs2071922,0.399  
1,171.835,rs203849,0.378  
1,172.204,rs4540637,0.354  
1,172.324,rs12049577,0.346  
1,172.419,rs3767481,0.350  
1,172.467,rs1008680,0.341  
1,172.502,rs7512951,0.308  
1,172.542,rs760685,0.288  
1,172.579,rs2255438,0.273  
1,172.589,rs2268545,0.313  
1,172.621,rs2300564,0.387  
1,172.645,rs742264,0.457  
1,172.651,rs2268539,0.473  
1,172.661,rs7535780,0.470  
1,172.764,rs1323530,0.440  
1,172.768,rs16860761,0.437  
1,172.908,rs7355223,0.403

1,172.942,rs10489218,0.408  
1,172.999,rs538060,0.372  
1,173.002,rs682367,0.372  
1,173.039,rs2207216,0.377  
1,173.041,rs736846,0.378  
1,173.072,rs3950134,0.383  
1,173.103,rs2206300,0.390  
1,173.253,rs169266,0.460  
1,173.331,rs1570334,0.502  
1,173.378,rs6657987,0.529  
1,173.485,rs3795611,0.513  
1,173.543,rs2984610,0.514  
1,173.581,rs10800398,0.518  
1,173.724,rs7544086,0.516  
1,173.876,rs1200100,0.532  
1,173.922,rs1200120,0.543  
1,173.933,rs2051145,0.546  
1,174.023,rs1200160,0.555  
1,174.356,rs1983546,0.633  
1,174.364,rs2038024,0.635  
1,174.368,rs2285211,0.637  
1,174.382,rs12120904,0.635  
1,174.399,rs6030,0.630  
1,174.418,rs6035,0.641  
1,174.428,rs6678795,0.645  
1,174.483,rs732314,0.684  
1,174.495,rs10919202,0.690  
1,174.645,rs9803860,0.647  
1,174.689,rs6692451,0.668  
1,174.822,rs1330369,0.706  
1,174.831,rs12135070,0.710  
1,174.838,rs532141,0.693  
1,174.845,rs4437927,0.674  
1,174.847,rs983118,0.670  
1,174.849,rs1547282,0.669  
1,174.879,rs16863369,0.677  
1,174.888,rs913257,0.695  
1,174.904,rs593479,0.687  
1,174.907,rs513287,0.643  
1,174.922,rs2143109,0.630  
1,174.948,rs3853181,0.593  
1,174.957,rs6608458,0.580  
1,174.958,rs7474070,0.586  
1,174.964,rs4916390,0.614  
1,174.979,rs7529080,0.664  
1,175.067,rs7547112,0.794  
1,175.079,rs12738952,0.807  
1,175.121,rs7519763,0.862  
1,175.142,rs12031933,0.887  
1,175.156,rs2207190,0.899  
1,175.231,rs10913149,0.967  
1,175.345,rs2421847,0.981  
1,175.392,rs235854,0.986  
1,175.404,rs7547017,0.989  
1,175.417,rs16864720,0.993  
1,175.500,rs6685742,1.032  
1,175.607,rs17650204,1.104  
1,175.620,rs909959,1.112  
1,175.761,rs4916239,1.254  
1,175.836,rs12028426,1.258  
1,175.873,rs2208370,1.260

1,175.986,rs16843795,1.242  
1,176.090,rs10911112,1.223  
1,176.111,rs11800549,1.227  
1,176.115,rs672740,1.226  
1,176.198,rs481154,1.206  
1,176.229,rs10489290,1.234  
1,176.250,rs2254810,1.233  
1,176.251,rs1492907,1.127  
1,176.253,rs6673027,1.158  
1,176.255,rs704842,1.140  
1,176.261,rs2071929,1.128  
1,176.303,rs11810332,1.039  
1,176.318,rs2227203,1.012  
1,176.327,rs972100,1.019  
1,176.346,rs2207061,0.975  
1,176.353,rs11484630,1.007  
1,176.354,rs10912540,1.011  
1,176.383,rs4916319,0.774  
1,176.437,rs10494489,0.774  
1,176.470,rs7526970,0.772  
1,176.478,rs2096148,0.771  
1,176.637,rs16845817,0.837  
1,176.655,rs1578624,0.844  
1,176.677,rs7526628,0.914  
1,176.837,rs10798282,0.992  
1,176.948,rs301696,1.030  
1,177.197,rs10489893,1.085  
1,177.996,rs2038025,1.281  
1,178.506,rs6690188,0.997  
1,178.549,rs6692370,0.997  
1,178.703,rs4652099,0.993  
1,178.737,rs12401659,1.033  
1,178.738,rs17312104,1.033  
1,178.771,rs10913063,1.044  
1,178.789,rs10913064,1.050  
1,178.891,rs6425361,1.021  
1,178.996,rs11810084,0.974  
1,179.058,rs10753110,0.944  
1,179.327,rs352314,0.717  
1,179.421,rs4233167,0.705  
1,179.432,rs6425386,0.725  
1,179.441,rs7535501,0.743  
1,179.466,rs2206510,0.737  
1,179.483,rs240099,0.740  
1,179.618,rs12094387,0.760  
1,179.650,rs2038047,0.775  
1,179.659,rs7521505,0.786  
1,179.718,rs2861885,0.858  
1,179.744,rs7519595,0.870  
1,179.755,rs10798499,0.925  
1,179.771,rs11577465,0.883  
1,179.810,rs982875,0.901  
1,179.845,rs12569209,0.917  
1,179.897,rs9662701,0.933  
1,179.918,rs11578222,0.954  
1,179.936,rs2902113,0.970  
1,180.002,rs1252071,0.992  
1,180.028,rs12035381,0.997  
1,180.054,rs3131308,0.997  
1,180.072,rs1885644,0.996  
1,180.088,rs4072161,0.981

1,180.118,rs3131322,0.950  
1,180.135,rs10798580,0.936  
1,180.157,rs943762,0.941  
1,180.164,rs3828137,0.944  
1,180.169,rs10913472,0.942  
1,180.177,rs869286,0.964  
1,180.192,rs12409266,1.004  
1,180.211,rs2185391,1.057  
1,180.307,rs178397,1.007  
1,180.432,rs11590951,1.023  
1,180.593,rs12022201,0.962  
1,180.622,rs2296376,1.027  
1,180.660,rs1490311,1.039  
1,181.094,rs4651024,1.021  
1,181.472,rs16854304,1.067  
1,181.473,rs10913816,1.067  
1,181.782,rs2504057,1.074  
1,181.808,rs10798715,1.075  
1,181.858,rs2504053,1.077  
1,181.893,rs4448483,1.075  
1,181.898,rs10913887,1.075  
1,182.255,rs17371084,1.019  
1,182.545,rs4336810,0.979  
1,182.644,rs3767170,0.952  
1,182.748,rs3911335,0.822  
1,182.770,rs357062,0.842  
1,182.771,rs6661125,0.842  
1,182.802,rs7536561,0.787  
1,183.292,rs16856123,0.679  
1,183.327,rs3845398,0.671  
1,183.335,rs12562357,0.669  
1,183.479,rs10494531,0.635  
1,183.493,rs12078544,0.632  
1,183.770,rs6700926,0.620  
1,183.900,rs2271668,0.602  
1,183.943,rs7515553,0.597  
1,183.958,rs3795505,0.599  
1,183.973,rs2297185,0.601  
1,183.985,rs3737062,0.604  
1,184.050,rs2331902,0.587  
1,184.081,rs3747956,0.578  
1,184.089,rs4652554,0.569  
1,184.096,rs17302632,0.563  
1,184.179,rs6425668,0.479  
1,184.188,rs4652572,0.467  
1,184.208,rs7523662,0.441  
1,184.364,rs7525299,0.273  
1,184.368,rs12094454,0.272  
1,184.399,rs12408625,0.278  
1,184.405,rs2609473,0.277  
1,184.457,rs591650,0.284  
1,184.470,rs601354,0.286  
1,184.512,rs629760,0.247  
1,184.540,rs943795,0.233  
1,184.555,rs558994,0.238  
1,184.583,rs4146634,0.242  
1,184.631,rs10494540,0.250  
1,184.708,rs4083386,0.274  
1,184.818,rs704329,0.311  
1,184.847,rs473200,0.320  
1,184.911,rs695072,0.382

1,185.003,rs12135968,0.421  
1,185.014,rs2262513,0.425  
1,185.068,rs1281317,0.428  
1,185.166,rs2236536,0.450  
1,185.214,rs3845452,0.452  
1,185.287,rs10911031,0.498  
1,185.343,rs2251093,0.535  
1,185.367,rs2256917,0.542  
1,185.403,rs2494467,0.552  
1,185.411,rs6703548,0.554  
1,185.433,rs10797768,0.559  
1,185.493,rs6674281,0.562  
1,185.532,rs497915,0.562  
1,185.552,rs155552,0.559  
1,185.660,rs266549,0.541  
1,185.669,rs10911098,0.541  
1,185.682,rs533259,0.520  
1,185.693,rs682585,0.501  
1,185.714,rs516567,0.543  
1,185.728,rs528846,0.507  
1,185.737,rs661506,0.514  
1,185.784,rs524269,0.545  
1,185.819,rs508607,0.575  
1,185.887,rs7540658,0.593  
1,185.929,rs2275171,0.577  
1,185.932,rs12080837,0.576  
1,186.028,rs6681606,0.557  
1,186.290,rs6424883,0.477  
1,186.312,rs6662844,0.466  
1,186.345,rs3845466,0.455  
1,186.350,rs2274065,0.454  
1,186.371,rs2231241,0.450  
1,186.465,rs4609388,0.430  
1,186.481,rs10797912,0.413  
1,186.484,rs2500123,0.409  
1,186.511,rs4262497,0.369  
1,186.540,rs4651156,0.342  
1,186.547,rs10911457,0.337  
1,186.553,rs4651157,0.335  
1,186.631,rs2378788,0.318  
1,186.634,rs16861794,0.320  
1,186.653,rs10911474,0.334  
1,186.659,rs7521638,0.330  
1,186.704,rs1952251,0.302  
1,186.719,rs10158437,0.267  
1,186.754,rs1409812,0.272  
1,186.760,rs1327144,0.273  
1,187.050,rs1339563,0.374  
1,187.136,rs6695173,0.372  
1,187.160,rs8972,0.446  
1,187.165,rs1572766,0.455  
1,187.188,rs10797982,0.462  
1,187.201,rs12131285,0.458  
1,187.212,rs170915,0.453  
1,187.216,rs234089,0.447  
1,187.219,rs10911661,0.447  
1,187.222,rs12127009,0.446  
1,187.223,rs12038919,0.446  
1,187.550,rs10798004,0.430  
1,187.587,rs10489482,0.434  
1,187.595,rs4651260,0.434

1,187.599,rs232295,0.407  
1,187.602,rs1504323,0.404  
1,187.607,rs232298,0.401  
1,187.636,rs10489702,0.447  
1,187.642,rs1321996,0.449  
1,187.713,rs971224,0.474  
1,187.781,rs1321991,0.466  
1,188.051,rs10911789,0.485  
1,188.145,rs10798035,0.502  
1,188.262,rs10489750,0.457  
1,188.271,rs1322375,0.454  
1,188.273,rs651967,0.455  
1,188.387,rs1293989,0.501  
1,188.483,rs1299376,0.492  
1,188.682,rs7514491,0.473  
1,188.691,rs10911898,0.473  
1,188.802,rs7554410,0.472  
1,188.813,rs926324,0.472  
1,188.830,rs3820185,0.470  
1,188.841,rs2076075,0.464  
1,188.845,rs12404877,0.462  
1,188.846,rs10737270,0.462  
1,188.860,rs1980444,0.404  
1,188.903,rs6697145,0.356  
1,188.968,rs1884022,0.312  
1,189.075,rs1924724,0.310  
1,189.113,rs330725,0.308  
1,189.133,rs17590592,0.306  
1,189.141,rs2453727,0.310  
1,189.156,rs2430132,0.273  
1,189.187,rs2311063,0.260  
1,189.201,rs585964,0.252  
1,189.299,rs671564,0.295  
1,189.369,rs7546596,0.326  
1,189.477,rs1994423,0.361  
1,189.507,rs2871869,0.375  
1,189.573,rs1387343,0.371  
1,189.662,rs4255388,0.280  
1,189.674,rs7537197,0.278  
1,190.159,rs7546105,0.215  
1,190.370,rs12128689,0.178  
1,190.381,rs445857,0.176  
1,190.488,rs7531899,0.136  
1,190.643,rs7547422,0.118  
1,190.950,rs12071814,0.114  
1,191.256,rs6428044,0.113  
1,191.332,rs2045121,0.114  
1,191.571,rs10159191,0.114  
1,191.850,rs661322,0.095  
1,192.082,rs1889994,0.103  
1,192.236,rs10494662,0.107  
1,192.353,rs9427802,0.107  
1,192.442,rs12405594,0.112  
1,192.786,rs1937235,0.152  
1,193.066,rs7545533,0.195  
1,193.097,rs2186024,0.214  
1,193.123,rs2476312,0.229  
1,193.137,rs10754013,0.242  
1,193.161,rs10921202,0.212  
1,193.164,rs2984921,0.209  
1,193.166,rs6701700,0.195



1,193.169,rs2760511,0.197  
1,193.195,rs12044559,0.264  
1,193.275,rs17646713,0.280  
1,193.353,rs1417416,0.330  
1,193.533,rs6667670,0.373  
1,193.661,rs2038750,0.433  
1,193.683,rs12729450,0.391  
1,193.713,rs1007460,0.349  
1,193.777,rs4344313,0.327  
1,193.821,rs12057376,0.312  
1,193.826,rs606149,0.311  
1,193.833,rs9943194,0.312  
1,193.889,rs2400382,0.308  
1,193.895,rs2131384,0.307  
1,193.899,rs7550967,0.307  
1,193.952,rs2210331,0.296  
1,194.053,rs598224,0.273  
1,194.093,rs6688980,0.269  
1,194.150,rs1324707,0.264  
1,194.198,rs12563798,0.271  
1,194.290,rs1339556,0.274  
1,194.413,rs10754147,0.305  
1,194.422,rs10921897,0.315  
1,194.462,rs2989965,0.337  
1,194.533,rs2923889,0.331  
1,194.542,rs1376803,0.320  
1,194.552,rs3008552,0.322  
1,194.558,rs10921984,0.323  
1,194.574,rs7517337,0.349  
1,194.587,rs10801499,0.370  
1,194.630,rs1160224,0.383  
1,194.633,rs17636783,0.384  
1,194.640,rs17688176,0.387  
1,194.727,rs10801520,0.421  
1,194.741,rs2094029,0.422  
1,194.818,rs2181948,0.429  
1,194.905,rs12075206,0.448  
1,195.015,rs6667243,0.419  
1,195.098,rs3762271,0.433  
1,195.225,rs10801601,0.469  
1,195.254,rs2786106,0.463  
1,195.330,rs7514167,0.445  
1,195.371,rs2287537,0.435  
1,195.603,rs2047539,0.367  
1,195.646,rs2065150,0.356  
1,195.773,rs6671879,0.348  
1,196.110,rs6428467,0.327  
1,196.149,rs12742531,0.324  
1,196.327,rs12120762,0.311  
1,196.473,rs12406238,0.290  
1,196.556,rs10919605,0.279  
1,196.785,rs427790,0.215  
1,196.871,rs12402922,0.238  
1,196.897,rs10800619,0.249  
1,196.953,rs9663039,0.289  
1,197.017,rs1561144,0.317  
1,197.400,rs1571147,0.348  
1,197.541,rs7540552,0.360  
1,198.086,rs12062734,0.379  
1,198.377,rs10800646,0.388  
1,198.405,rs12725952,0.388

1,198.731,rs2435240,0.377  
1,198.739,rs1425791,0.377  
1,198.885,rs6677214,0.375  
1,199.177,rs4465241,0.391  
1,199.444,rs2816913,0.412  
1,199.524,rs2821313,0.406  
1,199.567,rs2737665,0.402  
1,199.585,rs2816999,0.401  
1,199.710,rs2821338,0.402  
1,199.832,rs3790791,0.389  
1,199.883,rs2690035,0.405  
1,199.887,rs1060061,0.407  
1,199.958,rs12088130,0.449  
1,200.081,rs3861927,0.445  
1,200.544,rs4427435,0.477  
1,200.617,rs10919946,0.455  
1,200.637,rs6427832,0.448  
1,200.648,rs6680807,0.400  
1,200.841,rs10494824,0.385  
1,200.954,rs6665604,0.375  
1,201.041,rs4915451,0.388  
1,201.135,rs10494819,0.396  
1,201.145,rs7517998,0.395  
1,201.317,rs6697899,0.378  
1,201.642,rs12089839,0.354  
1,201.735,rs10920099,0.353  
1,201.811,rs16847613,0.367  
1,201.854,rs7539618,0.337  
1,201.880,rs2296383,0.320  
1,201.899,rs6699862,0.317  
1,201.908,rs10449267,0.297  
1,201.914,rs12022389,0.282  
1,201.933,rs2281845,0.279  
1,202.002,rs6703834,0.252  
1,202.043,rs7542768,0.236  
1,202.065,rs863826,0.234  
1,202.147,rs7533096,0.221  
1,202.160,rs947379,0.220  
1,202.220,rs3738270,0.220  
1,202.318,rs2078570,0.212  
1,202.328,rs16848183,0.211  
1,202.333,rs4915501,0.210  
1,202.351,rs832179,0.209  
1,202.558,rs2275864,0.216  
1,202.628,rs2799677,0.217  
1,202.662,rs2799685,0.204  
1,202.779,rs10494830,0.158  
1,202.814,rs12090950,0.155  
1,202.817,rs6690874,0.155  
1,202.885,rs675508,0.131  
1,202.907,rs10800784,0.124  
1,202.952,rs12135020,0.120  
1,203.055,rs12030585,0.101  
1,203.089,rs4915236,0.095  
1,203.176,rs483489,0.081  
1,203.212,rs1555936,0.073  
1,203.290,rs1736450,0.057  
1,203.326,rs586688,0.049  
1,203.515,rs4950838,0.027  
1,203.557,rs239980,0.026  
1,203.591,rs507068,0.026

1,203.696,rs2820289,0.032  
1,204.353,rs2047264,0.067  
1,204.355,rs2820327,0.062  
1,204.357,rs17473434,0.055  
1,204.360,rs16849483,0.048  
1,204.361,rs10920300,0.048  
1,204.364,rs4950760,0.064  
1,204.371,rs10800813,0.092  
1,204.374,rs4436441,0.096  
1,204.377,rs4363479,0.087  
1,204.378,rs10920338,0.084  
1,204.379,rs4359077,0.082  
1,204.384,rs10920362,0.098  
1,204.385,rs2860229,0.102  
1,204.391,rs2993444,0.102  
1,204.396,rs788815,0.102  
1,204.412,rs17490864,0.102  
1,204.417,rs12137988,0.102  
1,204.529,rs1417478,0.105  
1,204.834,rs11585565,0.113  
1,204.838,rs867315,0.094  
1,204.919,rs4072661,0.098  
1,204.920,rs4400672,0.098  
1,205.068,rs4245713,0.102  
1,205.114,rs4950949,0.105  
1,205.161,rs11590469,0.092  
1,205.200,rs4950887,0.092  
1,205.264,rs1342387,0.085  
1,205.266,rs2275735,0.085  
1,205.338,rs782810,0.073  
1,205.401,rs1774847,0.079  
1,205.421,rs782803,0.060  
1,205.440,rs754894,0.056  
1,205.444,rs12130133,0.054  
1,205.588,rs4950921,0.020  
1,205.601,rs10800901,0.019  
1,205.659,rs762625,0.022  
1,205.672,rs880633,0.023  
1,205.699,rs2486064,0.026  
1,205.707,rs2486949,0.026  
1,205.708,rs12042412,0.026  
1,205.724,rs17466945,0.024  
1,205.791,rs7537408,0.020  
1,205.844,rs871850,0.017  
1,205.878,rs4971234,0.016  
1,205.953,rs7543148,0.009  
1,205.985,rs1891175,0.007  
1,205.987,rs10800919,0.006  
1,206.035,rs10800925,0.005  
1,206.088,rs10920651,0.003  
1,206.416,rs12120868,0.021  
1,206.499,rs16852017,0.036  
1,206.513,rs4951357,0.035  
1,206.537,rs4951073,0.025  
1,206.538,rs7529482,0.025  
1,206.575,rs6655965,0.036  
1,206.719,rs872032,0.051  
1,206.774,rs12069734,0.051  
1,206.966,rs9438454,0.049  
1,207.027,rs2810624,0.045  
1,207.071,rs2796433,0.045

1,207.190,rs12023823,0.032  
1,207.203,rs940657,0.031  
1,207.222,rs6593993,0.029  
1,207.244,rs12563446,0.037  
1,207.245,rs4951304,0.037  
1,207.259,rs2037679,0.042  
1,207.285,rs1138617,0.040  
1,207.315,rs4951309,0.037  
1,207.368,rs7539596,0.031  
1,207.415,rs3924586,0.026  
1,207.541,rs4951056,0.012  
1,207.599,rs7525113,0.011  
1,207.710,rs10494855,0.018  
1,207.732,rs955323,0.020  
1,207.753,rs1980051,0.020  
1,207.769,rs2942121,0.025  
1,207.770,rs3106364,0.025  
1,207.778,rs11240735,0.028  
1,207.798,rs2942133,0.027  
1,207.862,rs12031854,0.023  
1,207.952,rs7554895,0.018  
1,208.038,rs4252690,0.014  
1,208.256,rs11801229,0.006  
1,208.264,rs4951090,0.006  
1,208.282,rs12079489,0.005  
1,208.293,rs1610399,0.004  
1,208.336,rs2782524,0.006  
1,208.822,rs2759282,-0.001  
1,208.828,rs11240302,-0.000  
1,208.840,rs16854617,-0.000  
1,208.889,rs2997505,-0.000  
1,208.956,rs2802851,-0.001  
1,209.053,rs7543481,-0.002  
1,209.060,rs6685118,-0.002  
1,209.083,rs12064077,-0.002  
1,209.099,rs6663324,-0.003  
1,209.136,rs3820336,-0.004  
1,209.153,rs16854920,-0.004  
1,209.180,rs2802842,-0.005  
1,209.471,rs1078362,-0.000  
1,209.519,rs4951182,-0.000  
1,209.588,rs2275869,0.000  
1,209.590,rs11110304,0.000  
1,209.641,rs10900479,-0.001  
1,209.654,rs6661074,-0.000  
1,209.670,rs1338624,-0.000  
1,209.684,rs1999131,0.001  
1,209.686,rs10900493,0.001  
1,209.693,rs17346947,0.000  
1,209.702,rs734773,0.000  
1,209.705,rs10900498,0.000  
1,209.709,rs1105822,0.000  
1,209.719,rs12751472,0.000  
1,209.739,rs3795550,0.000  
1,209.756,rs1114126,0.001  
1,209.758,rs6661827,0.001  
1,209.804,rs2027527,-0.000  
1,209.831,rs1361754,-0.001  
1,209.840,rs7364618,-0.004  
1,210.693,rs17006055,-0.021  
1,210.755,rs2336938,-0.022

1,210.789,rs7549189,-0.023  
1,210.814,rs1539243,-0.025  
1,210.849,rs10863430,-0.026  
1,210.941,rs7523985,-0.032  
1,210.952,rs9661909,-0.043  
1,210.997,rs4844540,-0.054  
1,211.077,rs3813972,-0.051  
1,211.096,rs6685813,-0.038  
1,211.103,rs6677934,-0.037  
1,211.119,rs6659397,-0.035  
1,211.282,rs4240844,-0.027  
1,211.313,rs4256810,-0.026  
1,211.429,rs1800896,-0.026  
1,211.460,rs885334,-0.027  
1,211.514,rs12044804,-0.028  
1,211.571,rs2243193,-0.021  
1,211.820,rs2000059,-0.031  
1,211.832,rs1856746,-0.031  
1,211.907,rs11586424,-0.032  
1,212.110,rs11120218,-0.035  
1,212.141,rs4425986,-0.037  
1,212.264,rs7529677,-0.040  
1,212.641,rs11117564,-0.051  
1,212.708,rs10779277,-0.047  
1,212.841,rs17044576,-0.039  
1,212.885,rs6690215,-0.039  
1,213.163,rs10494884,-0.037  
1,213.276,rs2796247,-0.021  
1,213.290,rs7572,-0.020  
1,213.295,rs2259397,-0.019  
1,213.356,rs651480,-0.006  
1,213.357,rs7535719,-0.006  
1,213.374,rs2745945,-0.004  
1,213.381,rs1152832,-0.004  
1,213.461,rs7540179,-0.001  
1,213.527,rs3811390,0.000  
1,213.530,rs17187133,0.000  
1,213.535,rs17187140,0.000  
1,213.540,rs668878,0.000  
1,213.573,rs2440900,0.000  
1,213.574,rs11118997,0.000  
1,213.632,rs1318276,0.002  
1,213.665,rs2782934,0.002  
1,213.667,rs6685511,0.004  
1,213.668,rs12739500,0.002  
1,213.717,rs1617731,0.000  
1,213.774,rs2897064,0.000  
1,213.852,rs696981,0.001  
1,213.868,rs696977,0.001  
1,213.949,rs701608,-0.000  
1,213.952,rs1499585,-0.000  
1,213.963,rs696958,-0.001  
1,213.971,rs10863712,-0.001  
1,213.979,rs701627,-0.001  
1,214.020,rs11119075,-0.001  
1,214.077,rs7548249,-0.001  
1,214.085,rs10494901,-0.001  
1,214.124,rs6540478,-0.001  
1,214.189,rs4391668,-0.003  
1,214.196,rs1166864,-0.001  
1,214.256,rs6664062,-0.005

1,214.279,rs1166873,-0.006  
1,214.364,rs17259916,-0.006  
1,214.414,rs1166906,-0.014  
1,214.439,rs1320540,-0.037  
1,214.440,rs4844443,-0.038  
1,214.443,rs4129434,-0.039  
1,214.484,rs1078550,-0.068  
1,214.492,rs6670957,-0.071  
1,214.529,rs1183044,-0.087  
1,214.540,rs10494917,-0.089  
1,214.566,rs6660522,-0.090  
1,214.670,rs2495295,-0.057  
1,214.726,rs1988163,-0.039  
1,214.739,rs2294938,-0.020  
1,214.757,rs7526722,-0.015  
1,214.805,rs6703183,-0.014  
1,214.811,rs11119306,-0.010  
1,214.812,rs6673693,-0.009  
1,214.815,rs10746420,-0.009  
1,214.822,rs7525534,-0.013  
1,214.844,rs9430004,-0.009  
1,214.853,rs2076222,-0.006  
1,214.877,rs742375,0.000  
1,214.881,rs4844484,0.006  
1,214.902,rs10863782,0.008  
1,214.928,rs4844891,0.018  
1,214.938,rs10489341,0.017  
1,214.945,rs11119344,0.017  
1,215.171,rs227178,0.010  
1,215.314,rs1002382,0.010  
1,215.488,rs845451,0.012  
1,215.572,rs615285,0.021  
1,215.665,rs3765871,0.027  
1,215.728,rs4601592,0.025  
1,215.801,rs7554508,0.024  
1,215.826,rs2206610,0.032  
1,215.861,rs4537555,0.033  
1,215.870,rs10863837,0.035  
1,215.880,rs4628571,0.015  
1,215.888,rs12401476,0.011  
1,215.903,rs1890844,0.005  
1,215.944,rs1418973,0.002  
1,215.947,rs11119613,0.002  
1,215.949,rs7556358,0.002  
1,215.964,rs1110266,0.002  
1,215.973,rs1125262,0.002  
1,216.101,rs1501551,0.000  
1,216.382,rs17188895,-0.000  
1,216.403,rs6540664,-0.000  
1,216.441,rs12134651,-0.000  
1,217.080,rs11119754,-0.002  
1,217.139,rs1777826,-0.003  
1,217.141,rs17695731,-0.003  
1,217.180,rs2165993,-0.006  
1,217.229,rs12030478,-0.007  
1,217.262,rs6692675,-0.006  
1,217.395,rs10429965,-0.001  
1,217.454,rs7513065,-0.000  
1,217.459,rs10494941,-0.000  
1,217.497,rs17494100,0.000  
1,217.499,rs7512315,0.000

1,217.543,rs10494942,0.000  
1,217.602,rs4951426,0.000  
1,217.911,rs2788140,0.000  
1,218.046,rs7545292,0.001  
1,218.080,rs11119860,0.002  
1,218.088,rs7550051,0.005  
1,218.089,rs6680653,0.002  
1,218.095,rs12039815,0.002  
1,218.142,rs7527863,0.004  
1,218.152,rs726558,0.004  
1,218.179,rs1342151,0.003  
1,218.229,rs12060029,0.002  
1,218.250,rs3767868,0.002  
1,218.376,rs3122712,0.007  
1,218.417,rs3795842,0.014  
1,218.915,rs3123537,0.014  
1,219.287,rs1655996,0.029  
1,219.289,rs1699185,0.029  
1,219.298,rs1656014,0.031  
1,219.299,rs17694573,0.032  
1,219.300,rs17020562,0.033  
1,219.315,rs11120129,0.035  
1,219.316,rs161441,0.035  
1,219.323,rs12036568,0.034  
1,219.333,rs965121,0.026  
1,219.341,rs10864051,0.022  
1,219.374,rs4561011,0.023  
1,219.410,rs11120179,0.033  
1,219.438,rs11120194,0.028  
1,219.456,rs12044591,0.024  
1,219.477,rs2793276,0.023  
1,219.479,rs11120205,0.023  
1,219.500,rs10864069,0.016  
1,219.516,rs1891060,0.015  
1,219.520,rs17709142,0.015  
1,219.556,rs12118140,0.010  
1,219.563,rs2359937,0.009  
1,219.581,rs1341146,0.008  
1,219.620,rs11120231,0.004  
1,219.621,rs11808079,0.004  
1,219.662,rs4655314,0.003  
1,219.757,rs4655316,0.002  
1,219.913,rs920489,0.002  
1,219.926,rs1795036,0.002  
1,220.085,rs11589520,0.002  
1,220.088,rs17022092,0.002  
1,220.302,rs4265402,0.002  
1,220.399,rs7519743,0.002  
1,220.402,rs7544984,0.002  
1,220.568,rs17022700,0.003  
1,220.604,rs11120305,0.005  
1,220.641,rs6676318,0.005  
1,220.651,rs3013445,0.005  
1,220.700,rs4636427,0.007  
1,220.702,rs12129366,0.007  
1,220.826,rs4394613,0.011  
1,220.852,rs17733405,0.005  
1,221.118,rs4311856,0.000  
1,221.439,rs6687966,-0.000  
1,221.507,rs335570,-0.001  
1,221.752,rs12747547,-0.002

1,222.013,rs1268910,-0.005  
1,222.209,rs11120453,-0.006  
1,222.280,rs7552523,-0.007  
1,222.553,rs1157492,-0.011  
1,223.004,rs12080135,-0.005  
1,223.499,rs7548730,-0.000  
1,223.505,rs2797236,-0.000  
1,223.549,rs2797218,-0.000  
1,223.579,rs4595347,-0.000  
1,223.585,rs2820727,0.000  
1,223.594,rs12146110,0.000  
1,223.616,rs7527334,0.000  
1,223.631,rs4363405,0.000  
1,223.715,rs7544464,-0.000  
1,223.728,rs1981227,-0.000  
1,223.742,rs1934424,-0.000  
1,223.781,rs531780,-0.000  
1,223.798,rs6540923,-0.000  
1,223.830,rs1821763,-0.001  
1,223.831,rs3856186,-0.001  
1,223.887,rs6657250,-0.000  
1,223.892,rs10864228,-0.000  
1,223.917,rs11587260,-0.000  
1,223.962,rs301734,-0.000  
1,224.020,rs1805049,-0.001  
1,224.136,rs700025,0.000  
1,224.285,rs12723493,0.002  
1,224.312,rs4548509,0.003  
1,224.331,rs4338426,0.005  
1,224.354,rs4360581,0.006  
1,224.375,rs10779265,0.006  
1,224.391,rs1833036,0.006  
1,224.430,rs1984137,0.008  
1,224.515,rs11117644,0.007  
1,224.533,rs10127480,0.007  
1,224.568,rs1416611,0.008  
1,224.604,rs2813703,0.009  
1,224.617,rs10779279,0.008  
1,224.630,rs6693633,0.007  
1,224.659,rs7355008,0.010  
1,224.676,rs12760372,0.016  
1,224.701,rs17044062,0.024  
1,224.750,rs2576262,0.033  
1,224.754,rs1436900,0.022  
1,224.769,rs2576203,0.016  
1,224.785,rs2576269,0.018  
1,224.865,rs17041541,0.031  
1,224.880,rs2789571,0.034  
1,224.896,rs6604651,0.033  
1,224.940,rs4537652,0.027  
1,224.959,rs6604652,0.029  
1,224.991,rs1502352,0.029  
1,224.994,rs7555255,0.023  
1,224.996,rs11117791,0.020  
1,225.036,rs2815211,0.015  
1,225.040,rs2646852,0.016  
1,225.042,rs6665347,0.018  
1,225.062,rs2646850,0.043  
1,225.078,rs2818973,0.062  
1,225.088,rs3790729,0.069  
1,225.101,rs4846419,0.087



1,225.169,rs17726462,0.075  
1,225.216,rs17739539,0.071  
1,225.241,rs871379,0.075  
1,225.253,rs1397178,0.077  
1,225.258,rs10495085,0.078  
1,225.260,rs2136685,0.078  
1,225.340,rs17047242,0.097  
1,225.344,rs12138324,0.097  
1,225.356,rs992010,0.098  
1,225.381,rs2046842,0.104  
1,225.406,rs2377781,0.110  
1,225.421,rs12033297,0.109  
1,225.447,rs683968,0.107  
1,225.516,rs11118065,0.102  
1,225.520,rs12563602,0.103  
1,225.535,rs1338445,0.098  
1,225.578,rs3121580,0.082  
1,225.585,rs11118083,0.081  
1,225.619,rs6662137,0.078  
1,225.631,rs10482750,0.078  
1,225.757,rs3009947,0.059  
1,225.762,rs11118119,0.059  
1,225.777,rs512589,0.058  
1,225.809,rs682483,0.065  
1,225.857,rs2965012,0.077  
1,226.007,rs9431469,0.123  
1,226.067,rs12033283,0.144  
1,226.076,rs6541234,0.146  
1,226.150,rs878394,0.149  
1,226.179,rs626518,0.144  
1,226.255,rs7540160,0.138  
1,226.268,rs17048992,0.135  
1,226.279,rs1256576,0.133  
1,226.390,rs6692892,0.102  
1,226.481,rs10779349,0.083  
1,226.514,rs2791559,0.060  
1,226.527,rs6691390,0.046  
1,226.533,rs2605082,0.040  
1,226.858,rs2066418,0.043  
1,226.922,rs6664521,0.045  
1,226.966,rs17006810,0.035  
1,226.967,rs9787289,0.045  
1,226.975,rs884127,0.042  
1,226.987,rs6700061,0.040  
1,227.145,rs10442693,0.027  
1,227.163,rs2808027,0.026  
1,227.202,rs12040095,0.023  
1,227.246,rs10779402,0.022  
1,227.272,rs6541128,0.022  
1,227.297,rs9803782,0.022  
1,227.300,rs7544009,0.022  
1,227.327,rs7531705,0.025  
1,227.361,rs6670633,0.022  
1,227.480,rs3737297,0.015  
1,227.555,rs7542375,0.009  
1,227.566,rs17009108,0.009  
1,227.587,rs2784264,0.009  
1,227.651,rs11118642,0.008  
1,227.748,rs4846689,0.009  
1,227.846,rs4313406,0.011  
1,227.921,rs10863614,0.010

1,227.979,rs9730262,0.007  
1,227.991,rs12025155,0.007  
1,228.036,rs11118771,0.005  
1,228.068,rs2176690,0.004  
1,228.070,rs17010508,0.004  
1,228.127,rs12091463,0.000  
1,228.130,rs12134633,0.000  
1,228.170,rs4240927,-0.001  
1,228.214,rs6673674,-0.000  
1,228.327,rs2800856,-0.001  
1,228.349,rs2584314,-0.000  
1,228.397,rs6702063,-0.001  
1,228.415,rs7513668,-0.002  
1,228.431,rs7518250,-0.002  
1,228.553,rs11485173,-0.003  
1,228.754,rs17464857,-0.017  
1,228.871,rs6683071,-0.055  
1,229.351,rs825130,-0.105  
1,229.386,rs11261280,-0.087  
1,229.397,rs12757009,-0.081  
1,229.398,rs17162164,-0.078  
1,229.403,rs12138067,-0.076  
1,229.422,rs4325124,-0.062  
1,229.436,rs12061221,-0.055  
1,229.531,rs9804135,-0.040  
1,229.601,rs1222154,-0.022  
1,229.748,rs2488513,-0.010  
1,229.755,rs10916197,-0.005  
1,229.848,rs2139155,-0.002  
1,229.873,rs6426088,-0.002  
1,229.949,rs16847945,-0.001  
1,229.994,rs10799573,-0.000  
1,230.093,rs698278,-0.001  
1,230.209,rs791014,-0.001  
1,230.262,rs1561109,-0.001  
1,230.265,rs6426154,-0.001  
1,230.267,rs892978,-0.001  
1,230.268,rs2405523,-0.001  
1,230.377,rs3856143,-0.000  
1,230.908,rs3949347,0.000  
1,230.996,rs3795443,0.000  
1,231.002,rs1771316,0.000  
1,231.006,rs1629896,0.000  
1,231.113,rs2769689,0.000  
1,231.150,rs17503834,0.001  
1,231.167,rs16845153,0.001  
1,231.172,rs2840945,0.001  
1,231.178,rs2840956,0.001  
1,231.182,rs7553931,0.001  
1,231.234,rs16845221,0.003  
1,231.267,rs6685014,0.004  
1,231.282,rs4653433,0.003  
1,231.312,rs868966,0.001  
1,231.325,rs1051740,0.000  
1,231.371,rs360102,0.001  
1,231.381,rs4653437,0.002  
1,231.435,rs2038393,0.001  
1,231.560,rs10915928,0.001  
1,231.674,rs10753415,0.003  
1,231.826,rs12567614,0.019  
1,231.952,rs11588657,0.026

1,231.969,rs1151815,0.037  
1,232.024,rs16846117,0.057  
1,232.035,rs837444,0.058  
1,232.061,rs3820632,0.061  
1,232.079,rs10916019,0.061  
1,232.132,rs708766,0.059  
1,232.182,rs3768414,0.058  
1,232.227,rs12033364,0.055  
1,232.232,rs708763,0.055  
1,232.381,rs7513120,0.054  
1,232.474,rs7521639,0.057  
1,232.716,rs7540055,0.057  
1,232.783,rs3014252,0.052  
1,232.829,rs4601553,0.049  
1,232.907,rs903698,0.049  
1,232.926,rs2644140,0.051  
1,233.150,rs2236359,0.045  
1,233.262,rs2313602,0.032  
1,233.497,rs1150907,0.024  
1,233.605,rs3795811,0.020  
1,233.841,rs3795817,0.023  
1,234.223,rs6703541,0.040  
1,234.321,rs12067649,0.045  
1,234.620,rs241301,0.065  
1,234.693,rs12089229,0.078  
1,234.739,rs3923210,0.052  
1,234.763,rs342824,0.049  
1,234.813,rs12029314,0.047  
1,234.827,rs342818,0.047  
1,234.845,rs6695100,0.072  
1,234.940,rs238102,0.036  
1,234.993,rs1002063,0.027  
1,235.025,rs506388,0.033  
1,235.144,rs12734075,0.024  
1,235.169,rs12040438,0.024  
1,235.174,rs348334,0.016  
1,235.278,rs1930903,0.023  
1,235.345,rs687266,0.020  
1,235.807,rs6663181,0.017  
1,235.922,rs6673349,0.028  
1,235.936,rs910820,0.029  
1,236.109,rs754666,0.025  
1,236.175,rs2144297,0.022  
1,236.176,rs7538126,0.022  
1,236.277,rs4846908,0.026  
1,236.402,rs1124110,0.021  
1,236.599,rs6703306,0.021  
1,236.623,rs10864732,0.020  
1,236.834,rs7552730,0.007  
1,236.874,rs11576324,0.006  
1,236.904,rs2273970,0.005  
1,236.905,rs2273967,0.005  
1,236.918,rs9431818,0.005  
1,236.936,rs6687864,0.005  
1,237.005,rs4846854,0.004  
1,237.013,rs730087,0.009  
1,237.192,rs10864745,0.018  
1,237.241,rs721532,0.018  
1,237.280,rs1545969,0.017  
1,237.339,rs11586533,0.033  
1,237.404,rs17599139,0.053

1,237.482,rs701157,0.084  
1,237.496,rs853444,0.088  
1,237.500,rs701164,0.089  
1,237.501,rs16851934,0.074  
1,237.608,rs853463,0.107  
1,237.656,rs927888,0.108  
1,237.660,rs1078197,0.107  
1,237.681,rs12405479,0.104  
1,237.713,rs2281951,0.099  
1,237.721,rs3789643,0.098  
1,237.732,rs943579,0.097  
1,237.736,rs1467670,0.096  
1,237.786,rs699,0.096  
1,237.877,rs3790955,0.109  
1,238.001,rs1202543,0.135  
1,238.002,rs11122614,0.135  
1,238.013,rs3748771,0.138  
1,238.167,rs3748775,0.174  
1,238.178,rs12093178,0.174  
1,238.260,rs13374343,0.175  
1,238.338,rs4304564,0.176  
1,238.349,rs4506448,0.175  
1,238.368,rs4378192,0.169  
1,238.400,rs10864662,0.150  
1,238.429,rs6674245,0.132  
1,238.476,rs7518479,0.154  
1,238.523,rs2180275,0.128  
1,238.639,rs1998027,0.095  
1,238.705,rs16854012,0.087  
1,238.844,rs203745,0.087  
1,238.851,rs12047385,0.087  
1,239.217,rs1769807,0.086  
1,239.355,rs6655954,0.094  
1,239.360,rs1765777,0.094  
1,239.531,rs16854785,0.094  
1,239.572,rs1934909,0.094  
1,239.618,rs4658883,0.094  
1,239.635,rs16854903,0.094  
1,239.674,rs7534681,0.093  
1,239.681,rs16854954,0.111  
1,239.756,rs2295959,0.104  
1,239.766,rs2759329,0.103  
1,239.787,rs7551537,0.100  
1,239.862,rs9432040,0.073  
1,239.893,rs967433,0.070  
1,239.966,rs701158,0.042  
1,239.977,rs9431732,0.040  
1,239.997,rs2772122,0.037  
1,240.098,rs16856152,0.050  
1,240.100,rs821631,0.050  
1,240.118,rs3524,0.052  
1,240.233,rs10864713,0.027  
1,240.311,rs1888601,0.033  
1,240.332,rs1571757,0.037  
1,240.404,rs16856640,0.053  
1,240.457,rs7411832,0.061  
1,240.536,rs4596830,0.072  
1,240.569,rs4564083,0.077  
1,240.579,rs9660420,0.065  
1,240.607,rs16856752,0.053  
1,240.612,rs12070718,0.055

1,240.649,rs1338300,0.069  
1,240.700,rs9660150,0.060  
1,240.706,rs9661059,0.059  
1,240.709,rs789360,0.058  
1,240.723,rs17176041,0.057  
1,240.799,rs12045182,0.062  
1,240.814,rs1890315,0.060  
1,240.820,rs2884089,0.059  
1,240.859,rs6664207,0.052  
1,240.967,rs12029169,0.054  
1,240.976,rs10910547,0.045  
1,241.030,rs12096229,0.031  
1,241.033,rs789633,0.031  
1,241.057,rs789666,0.029  
1,241.085,rs12072371,0.035  
1,241.117,rs17191808,0.030  
1,241.119,rs11810061,0.030  
1,241.129,rs2210669,0.030  
1,241.189,rs1970168,0.031  
1,241.211,rs9424568,0.043  
1,241.265,rs1986615,0.046  
1,241.441,rs2795425,0.056  
1,241.675,rs12048236,0.055  
1,242.049,rs9424606,0.064  
1,242.191,rs2224402,0.063  
1,243.032,rs10752798,0.053  
1,243.047,rs12059884,0.052  
1,243.310,rs6687497,0.041  
1,243.332,rs6424281,0.043  
1,243.389,rs10910665,0.048  
1,243.511,rs6657737,0.034  
1,243.697,rs701177,0.018  
1,243.786,rs11800619,0.014  
1,243.845,rs7546115,0.012  
1,244.053,rs6667845,0.012  
1,244.132,rs1294330,0.015  
1,244.151,rs10797448,0.016  
1,244.163,rs10737197,0.020  
1,244.180,rs10910157,0.027  
1,244.187,rs6687087,0.026  
1,244.221,rs6687124,0.027  
1,244.224,rs4233060,0.025  
1,244.247,rs780225,0.009  
1,244.264,rs6660091,0.013  
1,244.276,rs6681321,0.010  
1,244.284,rs2226114,0.008  
1,244.293,rs701204,0.003  
1,244.294,rs701209,0.002  
1,244.298,rs701220,0.001  
1,244.311,rs701232,0.001  
1,244.328,rs595191,0.001  
1,244.343,rs12239323,0.001  
1,244.380,rs12026196,0.001  
1,244.391,rs12068756,0.001  
1,244.555,rs1160305,0.006  
1,244.737,rs11576361,0.006  
1,244.783,rs4506523,0.006  
1,244.878,rs4348787,0.007  
1,244.894,rs7541879,0.007  
1,244.979,rs6662498,0.005  
1,245.264,rs12565924,0.001

1,245.366,rs2067795,0.001  
1,245.647,rs4333882,0.000  
1,245.663,rs622815,-0.000  
1,245.762,rs487890,-0.000  
1,245.835,rs10910404,-0.004  
1,245.880,rs480039,-0.007  
1,245.881,rs477265,-0.007  
1,245.895,rs517527,-0.008  
1,245.910,rs501664,-0.015  
1,245.955,rs561159,-0.016  
1,245.964,rs1407149,-0.016  
1,246.013,rs4128841,-0.016  
1,246.055,rs3001707,-0.010  
1,246.084,rs2991956,-0.010  
1,246.137,rs6698335,-0.014  
1,246.212,rs4027040,-0.012  
1,246.248,rs17517734,-0.012  
1,246.374,rs3768286,-0.011  
1,246.384,rs270524,-0.012  
1,246.434,rs270505,-0.013  
1,246.537,rs3951276,-0.022  
1,246.611,rs696859,-0.033  
1,246.919,rs12058613,-0.047  
1,247.039,rs624203,-0.055  
1,247.115,rs478425,-0.038  
1,247.138,rs16843932,-0.030  
1,247.144,rs4920270,-0.029  
1,247.185,rs2587531,-0.022  
1,247.187,rs2582650,-0.022  
1,247.225,rs4626924,-0.024  
1,247.448,rs6586430,-0.024  
1,247.472,rs10797566,-0.024  
1,247.517,rs2673968,-0.029  
1,247.595,rs938455,-0.049  
1,247.619,rs7532165,-0.045  
1,247.665,rs2674002,-0.041  
1,247.673,rs2802928,-0.040  
1,247.678,rs10910536,-0.040  
1,247.732,rs6586361,-0.034  
1,248.050,rs9659229,-0.020  
1,248.711,rs6699315,-0.008  
1,248.744,rs12745648,-0.007  
1,249.202,rs488618,-0.006  
1,249.288,rs4659946,-0.010  
1,249.336,rs11800419,-0.009  
1,249.352,rs6429206,-0.009  
1,249.409,rs10159416,-0.004  
1,249.494,rs7545788,-0.008  
1,250.110,rs4660131,-0.005  
1,250.142,rs17616115,-0.006  
1,250.197,rs3213190,-0.007  
1,250.232,rs4660139,-0.006  
1,250.298,rs12411075,-0.011  
1,250.317,rs6429466,-0.012  
1,250.413,rs964114,-0.025  
1,250.535,rs2064917,-0.018  
1,250.562,rs10802244,-0.012  
1,250.571,rs6689479,-0.010  
1,250.604,rs911271,-0.003  
1,250.651,rs7537965,-0.001  
1,250.669,rs13374732,-0.000

1,251.084,rs609516,-0.000  
1,251.104,rs605998,-0.000  
1,251.189,rs4659660,0.001  
1,251.327,rs637489,0.000  
1,251.343,rs17582358,0.001  
1,251.356,rs7512191,0.001  
1,251.391,rs585273,0.011  
1,251.453,rs7513978,0.022  
1,251.477,rs6689881,0.024  
1,251.501,rs1266381,0.025  
1,251.502,rs10802546,0.035  
1,251.508,rs12041958,0.027  
1,251.510,rs2799426,0.024  
1,251.511,rs10925158,0.024  
1,251.665,rs2794763,0.036  
1,251.960,rs707210,0.036  
1,251.977,rs1418071,0.035  
1,252.058,rs2297955,0.027  
1,252.092,rs7522310,0.024  
1,252.139,rs10925228,0.023  
1,252.306,rs2275568,0.020  
1,252.411,rs16834527,0.018  
1,252.536,rs7545717,0.016  
1,252.581,rs6683896,0.016  
1,252.584,rs4492605,0.016  
1,252.621,rs12133452,0.016  
1,252.667,rs1252160,0.013  
1,252.671,rs12410379,0.015  
1,252.682,rs4659764,0.020  
1,252.688,rs10925289,0.019  
1,252.697,rs12724972,0.017  
1,252.750,rs2385576,0.005  
1,252.792,rs10925300,0.006  
1,252.818,rs16834780,0.005  
1,252.865,rs6684412,0.001  
1,252.900,rs7551249,0.000  
1,252.919,rs6696837,0.000  
1,252.940,rs11810113,0.002  
1,253.025,rs1409052,0.001  
1,253.169,rs628414,0.008  
1,253.217,rs10495391,0.010  
1,253.282,rs918241,0.012  
1,253.289,rs10495392,0.012  
1,253.318,rs6429004,0.013  
1,253.328,rs1345497,0.014  
1,253.330,rs10802598,0.014  
1,253.404,rs7514255,0.014  
1,253.416,rs10925387,0.014  
1,253.438,rs10925401,0.017  
1,253.482,rs10925415,0.030  
1,253.568,rs6429023,0.037  
1,253.673,rs2618693,0.029  
1,253.773,rs2779394,0.030  
1,253.892,rs1717783,0.036  
1,253.935,rs939698,0.027  
1,253.989,rs490057,0.034  
1,254.070,rs1464459,0.037  
1,254.197,rs12086956,0.031  
1,254.210,rs10925501,0.031  
1,254.284,rs2250079,0.031  
1,254.321,rs12737847,0.029

1,254.439,rs6695129,0.026  
1,254.465,rs6703045,0.028  
1,254.713,rs2499604,0.030  
1,254.902,rs1340456,0.024  
1,255.201,rs16836417,0.023  
1,255.433,rs7543909,0.023  
1,255.495,rs9661467,0.023  
1,255.556,rs12094201,0.024  
1,255.619,rs259593,0.025  
1,255.785,rs10737826,0.029  
1,255.808,rs1021358,0.030  
1,255.895,rs12131363,0.044  
1,255.902,rs12067134,0.044  
1,255.905,rs6672226,0.044  
1,255.980,rs10925652,0.039  
1,256.003,rs10157478,0.039  
1,256.138,rs1327896,0.040  
1,256.210,rs491556,0.032  
1,256.245,rs789099,0.020  
1,256.262,rs1002726,0.019  
1,256.291,rs2653910,0.022  
1,256.379,rs2494076,0.031  
1,256.538,rs2174076,0.020  
1,257.056,rs10925747,0.018  
1,257.205,rs2841407,0.021  
1,257.348,rs2689128,0.020  
1,257.502,rs2689160,0.020  
1,257.646,rs10495426,0.023  
1,257.791,rs12145112,0.037  
1,257.793,rs9428818,0.037  
1,257.854,rs10925806,0.042  
1,257.870,rs12041748,0.041  
1,257.913,rs1509689,0.051  
1,257.939,rs4659902,0.056  
1,258.005,rs4659904,0.067  
1,258.036,rs1112903,0.065  
1,258.043,rs6703086,0.064  
1,258.445,rs2790634,0.078  
1,258.490,rs16838192,0.079  
1,258.934,rs1796835,0.074  
1,259.160,rs1782349,0.086  
1,259.385,rs2278642,0.117  
1,259.587,rs843030,0.119  
1,259.593,rs17657156,0.119  
1,259.685,rs665159,0.115  
1,259.716,rs6690809,0.137  
1,259.743,rs4523505,0.135  
1,259.803,rs602117,0.130  
1,259.825,rs10925994,0.124  
1,259.958,rs12036109,0.098  
1,259.987,rs10495449,0.075  
1,260.071,rs12563039,0.069  
1,260.107,rs1903630,0.060  
1,260.199,rs7539606,0.035  
1,260.269,rs2066298,0.047  
1,260.330,rs10926087,0.043  
1,260.377,rs11579499,0.042  
1,260.385,rs10495457,0.045  
1,260.532,rs11810574,0.076  
1,260.546,rs10926135,0.079  
1,261.042,rs10495466,0.149



1,261.077,rs9660912,0.154  
1,261.100,rs9662927,0.160  
1,261.116,rs12563220,0.167  
1,261.191,rs1414659,0.206  
1,261.195,rs1414657,0.205  
1,261.214,rs4659573,0.196  
1,261.236,rs12410581,0.184  
1,261.238,rs12096679,0.183  
1,261.265,rs10495470,0.194  
1,261.298,rs11578184,0.207  
1,261.305,rs9661430,0.210  
1,261.307,rs9661714,0.242  
1,261.327,rs10802881,0.257  
1,261.343,rs10465630,0.257  
1,261.359,rs7540147,0.275  
1,261.364,rs6702434,0.267  
1,261.394,rs3748540,0.253  
1,261.417,rs10495471,0.221  
1,261.430,rs12069813,0.180  
1,261.546,rs11578889,0.131  
1,261.555,rs7546054,0.109  
1,261.565,rs12126125,0.106  
1,261.592,rs6429215,0.099  
1,261.595,rs4659986,0.099  
1,261.623,rs6429216,0.077  
1,261.683,rs4659996,0.093  
1,261.703,rs6696418,0.106  
1,261.729,rs7536260,0.117  
1,261.747,rs6683045,0.125  
1,261.752,rs10802903,0.126  
1,261.774,rs947667,0.129  
1,262.161,rs3820259,0.125  
1,262.217,rs13376172,0.127  
1,262.730,rs261804,0.127  
1,262.733,rs6697598,0.128  
1,262.759,rs6429230,0.147  
1,262.774,rs10802917,0.142  
1,262.800,rs546547,0.149  
1,262.808,rs523361,0.128  
1,262.827,rs12059322,0.133  
1,262.861,rs1878729,0.143  
1,262.909,rs6429241,0.162  
1,262.943,rs4660036,0.167  
1,262.956,rs6667456,0.164  
1,263.008,rs2686240,0.171  
1,263.017,rs1879744,0.169  
1,263.039,rs4660051,0.166  
1,263.060,rs10737856,0.182  
1,263.063,rs9782891,0.183  
1,263.086,rs1341468,0.191  
1,263.105,rs10802949,0.192  
1,263.108,rs10802951,0.191  
1,263.122,rs12038803,0.200  
1,263.134,rs4660075,0.236  
1,263.148,rs1557078,0.251  
1,263.163,rs1557079,0.248  
1,263.179,rs10926483,0.277  
1,263.182,rs1544190,0.279  
1,263.231,rs10754728,0.298  
1,263.290,rs1932440,0.252  
1,263.298,rs2050505,0.248

1,263.299,rs12410855,0.256  
1,263.302,rs12079041,0.280  
1,263.306,rs3007738,0.277  
1,263.315,rs2275163,0.271  
1,263.339,rs1053230,0.249  
1,263.345,rs650833,0.241  
1,263.389,rs663814,0.223  
1,263.393,rs10802975,0.223  
1,263.409,rs6429288,0.195  
1,263.429,rs12133073,0.148  
1,263.432,rs9428886,0.144  
1,263.465,rs6690359,0.103  
1,263.541,rs9428895,0.113  
1,263.564,rs6691782,0.114  
1,263.595,rs735943,0.082  
1,263.606,rs1047840,0.055  
1,263.622,rs4658535,0.039  
1,263.633,rs12568965,0.035  
1,263.636,rs6660916,0.045  
1,263.648,rs4658565,0.056  
1,263.650,rs7516206,0.056  
1,263.658,rs3845563,0.058  
1,263.802,rs4274045,0.067  
1,263.816,rs10926623,0.067  
1,263.945,rs1847097,0.067  
1,264.018,rs390956,0.053  
1,264.364,rs3863747,0.045  
1,264.709,rs2796135,0.026  
1,264.807,rs7545843,0.026  
1,264.935,rs2654882,0.024  
1,265.050,rs10926748,0.025  
1,265.136,rs10803047,0.026  
1,265.141,rs6429360,0.026  
1,265.231,rs2654894,0.030  
1,265.298,rs2810011,0.032  
1,265.317,rs11576273,0.033  
1,265.347,rs11804678,0.037  
1,265.520,rs1938341,0.064  
1,265.898,rs11580100,0.066  
1,266.101,rs10926828,0.087  
1,266.171,rs914940,0.093  
1,266.307,rs10803083,0.097  
1,266.344,rs7514112,0.098  
1,266.417,rs10803086,0.095  
1,266.676,rs12407970,0.086  
1,266.835,rs4658504,0.080  
1,267.009,rs6679417,0.072  
1,267.037,rs3003542,0.072  
1,268.011,rs4658538,0.077  
1,268.815,rs2490400,0.081  
1,268.840,rs2802723,0.082  
1,269.209,rs2039838,0.092  
1,269.434,rs9428576,0.122  
1,269.525,rs1121276,0.101  
1,270.164,rs4658597,0.137  
1,270.284,rs472276,0.137  
1,270.426,rs1000543,0.109  
1,270.442,rs7512607,0.100  
1,270.489,rs11590416,0.070  
1,270.504,rs2353097,0.067  
1,270.534,rs2454228,0.064

1,270.564,rs4658613,0.072  
1,270.616,rs10927137,0.087  
1,270.635,rs12402376,0.097  
1,270.666,rs12131999,0.112  
1,270.675,rs10803181,0.116  
1,270.703,rs12087666,0.167  
1,270.748,rs9659599,0.233  
1,270.769,rs12032278,0.276  
1,270.790,rs4634891,0.321  
1,270.807,rs12048859,0.343  
1,270.811,rs12139694,0.346  
1,270.813,rs879065,0.346  
1,270.890,rs721842,0.357  
1,270.927,rs651529,0.376  
1,270.979,rs3120118,0.391  
1,271.026,rs497436,0.414  
1,271.030,rs6663981,0.418  
1,271.078,rs11580053,0.466  
1,271.100,rs3102463,0.444  
1,271.155,rs6429464,0.436  
1,271.164,rs12087973,0.436  
1,271.303,rs3003301,0.392  
1,271.540,rs10803228,0.512  
1,271.699,rs12057937,0.697  
1,271.746,rs11577325,0.737  
1,271.755,rs7550312,0.731  
1,271.810,rs2134271,0.717  
1,271.836,rs9661248,0.724  
1,271.877,rs9662967,0.703  
1,271.897,rs2365685,0.679  
1,271.952,rs10927330,0.569  
1,272.127,rs6684661,0.453  
1,272.144,rs6676378,0.481  
1,272.154,rs6429511,0.476  
1,272.178,rs7540416,0.525  
1,272.393,rs4658690,0.498  
1,272.447,rs4658698,0.488  
1,272.471,rs4072543,0.484  
1,272.476,rs6693918,0.483  
1,272.484,rs6672147,0.490  
1,272.535,rs6676019,0.564  
1,272.556,rs12039117,0.571  
1,272.570,rs6656693,0.574  
1,272.572,rs4658714,0.581  
1,272.582,rs6661783,0.653  
1,272.587,rs3795475,0.651  
1,272.621,rs6428904,0.636  
1,272.644,rs7549180,0.626  
1,272.791,rs12084148,0.564  
1,272.798,rs12239562,0.562  
1,272.839,rs4658749,0.549  
1,272.924,rs1173847,0.519  
1,272.973,rs819876,0.478  
1,273.021,rs1111813,0.467  
1,273.029,rs1773825,0.468  
1,273.056,rs704649,0.454  
1,273.070,rs1093937,0.450  
1,273.115,rs1093920,0.470  
1,273.120,rs1538472,0.470  
1,273.122,rs6428923,0.472  
1,273.145,rs12089406,0.510

1,273.153,rs1538467,0.485  
1,273.207,rs6662614,0.534  
1,273.237,rs6690046,0.609  
1,273.243,rs10802219,0.621  
1,273.251,rs7536825,0.734  
1,273.253,rs9919234,0.745  
1,273.298,rs6687026,0.820  
1,273.354,rs7550851,0.866  
1,273.408,rs1771522,0.910  
1,273.479,rs6701020,0.928  
1,273.554,rs871840,0.961  
1,273.666,rs10802264,1.067  
1,273.741,rs6687221,1.121  
1,273.777,rs2791390,1.150  
1,273.793,rs2791398,1.167  
1,273.795,rs2791400,1.171  
1,273.866,rs12088171,1.128  
1,273.894,rs9729771,1.167  
1,274.037,rs10924388,0.997  
1,274.114,rs6695221,0.942  
1,274.171,rs4654180,0.934  
1,274.489,rs7551290,0.956  
1,274.585,rs12128836,0.968  
1,274.749,rs12760011,0.987  
1,275.001,rs1339965,1.018  
1,275.198,rs7537318,0.994  
1,275.301,rs10924772,0.975  
1,275.343,rs4654291,0.983  
1,275.404,rs4531261,0.993  
1,275.553,rs3124089,1.051  
1,275.604,rs4072061,1.086  
1,275.670,rs10802440,1.128  
1,275.794,rs6699332,1.127  
1,275.833,rs6694274,1.125  
1,275.913,rs10924848,1.128  
1,275.945,rs7549408,1.129  
1,276.147,rs1691234,1.170  
1,276.333,rs2255481,1.192  
1,276.565,rs7521596,1.134  
1,276.575,rs6663210,1.131  
1,276.623,rs1609840,1.117  
1,276.764,rs12118988,1.068  
1,276.967,rs10737800,1.029  
1,276.987,rs6702432,1.031  
1,277.034,rs10399672,1.038  
1,277.046,rs12130139,1.040  
1,277.064,rs7542425,1.055  
1,277.133,rs4925650,1.080  
1,277.143,rs3738447,1.060  
1,277.181,rs10159239,1.040  
1,277.214,rs10737808,1.000  
1,277.244,rs10802514,0.948  
1,277.364,rs10802521,1.008  
1,277.368,rs6426255,1.008  
1,277.413,rs3862182,0.930  
1,277.481,rs869111,0.887  
1,277.541,rs1144815,0.882  
1,277.838,rs10788785,0.789  
1,277.846,rs10888379,0.790  
1,278.075,rs4925753,0.790  
1,278.087,rs11204538,0.791

1,278.114,rs10888267,0.790  
1,278.258,rs6664332,0.782  
1,278.569,rs11204592,0.714  
1,278.850,rs6587440,0.692  
1,278.932,rs10888354,0.681  
1,280.223,rs11205405,0.568  
2,1.878,rs6755432,0.409  
2,2.003,rs10181051,0.411  
2,2.098,rs6717613,0.408  
2,2.113,rs6719944,0.425  
2,2.146,rs6548226,0.453  
2,2.149,rs6548227,0.457  
2,2.202,rs4374407,0.475  
2,2.299,rs2724856,0.508  
2,2.327,rs2724861,0.510  
2,2.444,rs13411762,0.505  
2,2.478,rs2724882,0.512  
2,2.487,rs6712649,0.513  
2,2.513,rs4241319,0.493  
2,2.582,rs9784046,0.446  
2,2.586,rs6728479,0.442  
2,2.616,rs2293084,0.418  
2,2.640,rs1320334,0.417  
2,2.660,rs2867137,0.414  
2,2.725,rs4854369,0.404  
2,2.768,rs10183412,0.402  
2,2.858,rs4533500,0.372  
2,2.865,rs11682609,0.371  
2,2.895,rs4854414,0.370  
2,3.071,rs7598261,0.382  
2,3.107,rs4971336,0.395  
2,3.163,rs4586665,0.403  
2,3.200,rs6716119,0.406  
2,3.261,rs4998208,0.412  
2,3.273,rs4246561,0.410  
2,3.359,rs4971418,0.349  
2,3.485,rs13021490,0.327  
2,3.490,rs4641984,0.326  
2,3.497,rs4927635,0.326  
2,3.553,rs4927600,0.331  
2,3.575,rs4927602,0.333  
2,3.584,rs11897977,0.326  
2,3.627,rs2071402,0.300  
2,3.647,rs1567919,0.305  
2,3.660,rs11891272,0.308  
2,3.707,rs10201842,0.282  
2,3.730,rs10196514,0.286  
2,3.897,rs10183727,0.317  
2,3.907,rs9752743,0.297  
2,3.919,rs6713543,0.305  
2,3.974,rs1544846,0.343  
2,3.989,rs2288184,0.335  
2,4.000,rs2288183,0.329  
2,4.031,rs9917191,0.313  
2,4.103,rs2059412,0.330  
2,4.120,rs6759577,0.334  
2,4.196,rs6728613,0.328  
2,4.359,rs10185662,0.268  
2,4.396,rs891878,0.259  
2,4.435,rs4853811,0.266  
2,4.596,rs751150,0.310

2,4.686,rs2042142,0.381  
2,4.706,rs1465389,0.390  
2,4.860,rs10865533,0.468  
2,4.880,rs4853946,0.497  
2,4.882,rs17247253,0.497  
2,4.957,rs12470297,0.436  
2,4.995,rs10519519,0.416  
2,4.999,rs7588195,0.415  
2,5.204,rs6759198,0.453  
2,5.313,rs6741513,0.460  
2,5.443,rs1706871,0.449  
2,5.572,rs10865530,0.444  
2,5.577,rs13004261,0.444  
2,5.588,rs4853800,0.445  
2,5.639,rs908355,0.451  
2,5.702,rs6548093,0.457  
2,5.714,rs6548091,0.460  
2,5.757,rs7586549,0.485  
2,5.807,rs7586516,0.515  
2,5.823,rs1451199,0.525  
2,5.867,rs4853888,0.534  
2,5.907,rs10202240,0.543  
2,5.937,rs10184017,0.538  
2,5.957,rs1470738,0.589  
2,6.009,rs734614,0.591  
2,6.031,rs6548077,0.541  
2,6.034,rs2385311,0.532  
2,6.085,rs1451197,0.442  
2,6.143,rs730344,0.500  
2,6.154,rs12619156,0.500  
2,6.172,rs2385315,0.498  
2,6.223,rs7569763,0.436  
2,6.268,rs934556,0.381  
2,6.300,rs823231,0.358  
2,6.339,rs823243,0.350  
2,6.454,rs4853851,0.345  
2,6.467,rs17486311,0.341  
2,6.549,rs4853954,0.306  
2,6.572,rs1667060,0.276  
2,6.591,rs1667032,0.252  
2,6.713,rs10210870,0.218  
2,6.732,rs12479004,0.236  
2,6.850,rs12714369,0.184  
2,6.975,rs7592329,0.202  
2,6.981,rs6761955,0.204  
2,7.006,rs7559077,0.179  
2,7.009,rs1078821,0.141  
2,7.009,rs1078819,0.136  
2,7.014,rs6548160,0.159  
2,7.121,rs10208086,0.131  
2,7.449,rs7606684,0.106  
2,7.848,rs7592700,0.078  
2,7.957,rs10205909,0.076  
2,8.100,rs10197283,0.090  
2,8.170,rs6542658,0.088  
2,8.241,rs13017757,0.086  
2,8.245,rs11902670,0.077  
2,8.248,rs13004318,0.068  
2,8.272,rs17017737,0.041  
2,8.277,rs7567724,0.039  
2,8.295,rs2872168,0.037

2,8.433,rs2043080,0.044  
2,8.543,rs2603148,0.030  
2,8.584,rs2249380,0.025  
2,8.654,rs7559461,0.020  
2,8.698,rs11886534,0.026  
2,8.760,rs11903032,0.024  
2,8.805,rs2034732,0.024  
2,8.862,rs722087,0.034  
2,8.870,rs4849997,0.035  
2,8.878,rs4849999,0.041  
2,8.907,rs2313468,0.061  
2,8.916,rs7591808,0.062  
2,8.961,rs883258,0.068  
2,9.102,rs12464708,0.098  
2,9.168,rs4372915,0.116  
2,9.224,rs4850024,0.133  
2,9.425,rs1545136,0.127  
2,9.501,rs1437701,0.133  
2,9.536,rs6714273,0.138  
2,9.751,rs6542691,0.162  
2,9.752,rs7574256,0.162  
2,9.779,rs7419807,0.140  
2,9.828,rs6542697,0.140  
2,9.885,rs7589994,0.164  
2,9.925,rs17019005,0.181  
2,9.928,rs4585039,0.182  
2,10.063,rs6542706,0.174  
2,10.164,rs10165034,0.182  
2,10.210,rs2677912,0.187  
2,10.318,rs589804,0.222  
2,10.510,rs9308783,0.243  
2,10.698,rs4849968,0.238  
2,10.864,rs957504,0.229  
2,10.913,rs17019820,0.227  
2,11.184,rs6542644,0.253  
2,11.267,rs721087,0.236  
2,11.295,rs6422705,0.230  
2,11.314,rs11123605,0.224  
2,11.319,rs6422704,0.222  
2,11.349,rs2872977,0.220  
2,11.905,rs766144,0.265  
2,11.980,rs1869408,0.281  
2,12.009,rs1453798,0.256  
2,12.016,rs4670034,0.248  
2,12.056,rs4668488,0.202  
2,12.094,rs13421030,0.200  
2,12.195,rs4462764,0.227  
2,12.356,rs4669198,0.235  
2,12.418,rs13010129,0.238  
2,12.498,rs6734151,0.247  
2,12.542,rs2349682,0.221  
2,12.543,rs6727285,0.221  
2,12.572,rs10929519,0.216  
2,12.592,rs1524490,0.217  
2,12.613,rs6720039,0.215  
2,12.646,rs792102,0.182  
2,12.657,rs792111,0.175  
2,12.718,rs17291890,0.136  
2,12.751,rs10495519,0.124  
2,12.794,rs969768,0.108  
2,12.800,rs4668614,0.105

2,12.802,rs792071,0.104  
2,12.843,rs10194520,0.105  
2,12.865,rs4669392,0.106  
2,13.031,rs2882274,0.071  
2,13.139,rs7557343,0.072  
2,13.191,rs10171668,0.070  
2,13.354,rs4547512,0.060  
2,13.436,rs7596062,0.056  
2,13.492,rs2564050,0.053  
2,13.524,rs2722602,0.066  
2,13.544,rs16864146,0.067  
2,13.648,rs2722583,0.069  
2,13.724,rs2709447,0.070  
2,13.769,rs2163025,0.066  
2,13.797,rs6750041,0.064  
2,13.808,rs891251,0.063  
2,13.909,rs2350571,0.052  
2,13.916,rs4257373,0.051  
2,13.929,rs10495528,0.051  
2,13.937,rs4293540,0.050  
2,13.973,rs4669966,0.048  
2,14.062,rs11691189,0.056  
2,14.089,rs2709437,0.056  
2,14.132,rs941009,0.060  
2,14.313,rs1818962,0.070  
2,14.409,rs2693889,0.065  
2,14.449,rs1526374,0.065  
2,14.545,rs7566793,0.058  
2,14.716,rs10519722,0.055  
2,14.813,rs12623864,0.059  
2,14.861,rs751394,0.078  
2,14.912,rs7591996,0.075  
2,14.923,rs6751561,0.074  
2,15.132,rs6723180,0.056  
2,15.223,rs16865345,0.055  
2,15.442,rs10495541,0.068  
2,15.519,rs930978,0.070  
2,15.685,rs308001,0.076  
2,15.696,rs7582948,0.077  
2,15.697,rs308003,0.077  
2,15.808,rs13413734,0.103  
2,15.883,rs954845,0.105  
2,16.021,rs1566982,0.119  
2,16.040,rs4669100,0.117  
2,16.062,rs905968,0.116  
2,16.120,rs1077583,0.100  
2,16.147,rs6431834,0.101  
2,16.191,rs2712032,0.093  
2,16.241,rs2197829,0.102  
2,16.432,rs3796115,0.088  
2,16.436,rs6431837,0.088  
2,16.534,rs771283,0.097  
2,16.601,rs771306,0.129  
2,16.684,rs771320,0.141  
2,16.699,rs4669122,0.148  
2,16.786,rs771268,0.164  
2,17.223,rs2352400,0.199  
2,17.416,rs930767,0.208  
2,17.481,rs7588701,0.195  
2,17.546,rs17672986,0.180  
2,17.791,rs6431869,0.196



2,17.981,rs6750297,0.241  
2,17.995,rs10179297,0.242  
2,18.174,rs13005109,0.263  
2,18.224,rs2028381,0.269  
2,18.369,rs1367272,0.292  
2,18.380,rs6732885,0.293  
2,18.433,rs732078,0.296  
2,18.718,rs6431885,0.328  
2,18.938,rs2049072,0.349  
2,19.223,rs11682611,0.321  
2,19.255,rs810067,0.319  
2,19.323,rs2948927,0.321  
2,19.417,rs772428,0.319  
2,19.781,rs7564066,0.252  
2,19.803,rs1861506,0.247  
2,19.939,rs11894196,0.223  
2,19.978,rs40996,0.216  
2,19.990,rs12468177,0.230  
2,19.998,rs6753101,0.237  
2,20.008,rs4669238,0.234  
2,20.078,rs16866569,0.212  
2,20.107,rs6728934,0.230  
2,20.390,rs4668562,0.199  
2,20.766,rs181136,0.178  
2,21.348,rs238630,0.165  
2,21.426,rs7595804,0.145  
2,21.546,rs3102937,0.120  
2,21.897,rs4669256,0.108  
2,22.061,rs901350,0.075  
2,22.126,rs1872603,0.034  
2,22.175,rs2630720,0.023  
2,22.223,rs2655455,0.040  
2,22.270,rs1504240,0.059  
2,22.479,rs10192647,0.049  
2,22.697,rs1532791,0.039  
2,22.742,rs3856451,0.026  
2,22.798,rs4669330,0.022  
2,22.984,rs13390283,0.017  
2,23.012,rs11894892,0.015  
2,23.311,rs12471187,0.001  
2,23.312,rs1109670,0.001  
2,23.312,rs13423661,0.006  
2,23.313,rs1467079,0.011  
2,23.314,rs12692379,0.007  
2,23.315,rs6431990,0.004  
2,23.315,rs12615983,0.003  
2,23.315,rs2136842,0.000  
2,23.316,rs6758205,0.000  
2,24.251,rs10179642,-0.000  
2,24.753,rs3762535,-0.000  
2,24.822,rs10929592,-0.001  
2,24.835,rs884427,-0.001  
2,24.933,rs7608996,-0.003  
2,25.096,rs16867116,-0.008  
2,25.098,rs9287712,-0.008  
2,25.297,rs4668634,-0.003  
2,25.467,rs4669444,-0.002  
2,25.554,rs10200632,-0.001  
2,25.561,rs4669453,-0.001  
2,25.570,rs871820,-0.004  
2,25.636,rs6739059,-0.006

2,25.649,rs10929616,-0.008  
2,25.663,rs7559852,-0.011  
2,25.675,rs10803704,-0.010  
2,25.718,rs7568330,-0.010  
2,25.889,rs16867226,-0.011  
2,25.973,rs4669507,-0.013  
2,26.009,rs6708858,-0.015  
2,26.101,rs6705493,-0.013  
2,26.121,rs1469541,-0.012  
2,26.155,rs6716186,-0.012  
2,26.274,rs4233874,-0.005  
2,26.321,rs11680378,-0.005  
2,26.391,rs7585544,-0.008  
2,26.430,rs2241113,-0.007  
2,26.488,rs7593918,-0.002  
2,26.593,rs6741014,0.001  
2,26.635,rs6432075,0.002  
2,26.649,rs1006866,0.002  
2,26.658,rs6432079,0.002  
2,26.658,rs16855996,0.002  
2,26.677,rs759341,0.001  
2,26.715,rs759343,0.001  
2,26.731,rs7556858,0.000  
2,26.735,rs16856070,0.000  
2,26.758,rs6432083,0.000  
2,26.777,rs4669564,0.000  
2,26.805,rs2357541,0.000  
2,26.886,rs1003652,0.001  
2,26.927,rs10197851,0.002  
2,26.968,rs11677361,0.001  
2,26.985,rs6755271,0.001  
2,27.002,rs13392890,0.002  
2,27.113,rs1974676,0.009  
2,27.135,rs11694911,0.011  
2,27.159,rs1405948,0.013  
2,27.228,rs818167,0.018  
2,27.241,rs2430424,0.018  
2,27.319,rs7609435,0.018  
2,27.332,rs10185605,0.018  
2,27.343,rs1405950,0.020  
2,27.369,rs1641147,0.023  
2,27.465,rs3732114,0.034  
2,27.764,rs11676727,0.021  
2,27.820,rs12468286,0.019  
2,27.876,rs4669621,0.018  
2,27.885,rs10929698,0.017  
2,27.988,rs4799,0.016  
2,28.051,rs2884289,0.015  
2,28.076,rs17365477,0.015  
2,28.112,rs1734389,0.013  
2,28.148,rs1734337,0.013  
2,28.158,rs1997523,0.013  
2,28.173,rs10178826,0.015  
2,28.191,rs1317981,0.018  
2,28.198,rs4669639,0.019  
2,28.222,rs1882646,0.022  
2,28.257,rs2091817,0.021  
2,28.304,rs1453084,0.021  
2,28.366,rs10199787,0.029  
2,28.401,rs6748518,0.042  
2,28.447,rs754798,0.040

2,28.523,rs10176051,0.040  
2,28.568,rs2357888,0.038  
2,28.608,rs16857117,0.036  
2,28.617,rs11892303,0.037  
2,28.629,rs6432168,0.038  
2,28.645,rs13019468,0.038  
2,28.715,rs6739182,0.038  
2,28.728,rs7608117,0.038  
2,29.211,rs4668723,0.056  
2,29.245,rs12466910,0.061  
2,29.347,rs11687681,0.052  
2,29.525,rs9287731,0.026  
2,29.616,rs6432212,0.020  
2,29.688,rs7578132,0.020  
2,29.812,rs11681838,0.020  
2,29.895,rs7584842,0.019  
2,29.965,rs6718783,0.017  
2,29.996,rs2304402,0.017  
2,30.099,rs11690767,0.021  
2,30.201,rs7567183,0.020  
2,30.458,rs7595221,0.026  
2,30.581,rs11690125,0.025  
2,30.654,rs1050800,0.019  
2,30.727,rs6735995,0.018  
2,30.728,rs10495585,0.018  
2,30.769,rs953071,0.044  
2,30.859,rs4296404,0.058  
2,30.947,rs2581084,0.072  
2,30.982,rs12468031,0.075  
2,31.103,rs2581053,0.088  
2,31.116,rs1530145,0.089  
2,31.127,rs1036668,0.090  
2,31.178,rs12618497,0.094  
2,31.298,rs17549909,0.100  
2,31.339,rs10495589,0.100  
2,31.423,rs6732455,0.105  
2,31.442,rs6738871,0.107  
2,31.495,rs10201732,0.114  
2,31.623,rs12617169,0.131  
2,31.805,rs7587168,0.119  
2,31.930,rs7567643,0.128  
2,31.936,rs10754960,0.128  
2,32.257,rs7563729,0.138  
2,32.412,rs10176670,0.101  
2,32.506,rs1547587,0.082  
2,32.584,rs7594033,0.079  
2,32.602,rs10169963,0.077  
2,32.699,rs11898082,0.071  
2,32.793,rs6432315,0.061  
2,32.864,rs939221,0.032  
2,33.034,rs10490550,0.014  
2,33.277,rs2113818,0.005  
2,33.339,rs13000767,0.004  
2,33.375,rs7557984,0.004  
2,33.580,rs779374,0.005  
2,33.640,rs1402545,0.005  
2,33.726,rs7567155,0.002  
2,33.730,rs1818595,0.002  
2,33.914,rs4669910,0.000  
2,34.033,rs2046266,-0.000  
2,34.411,rs10495614,-0.000

2,34.432,rs13022060,-0.003  
2,34.465,rs494516,-0.005  
2,34.472,rs10495633,-0.010  
2,34.602,rs10170192,-0.010  
2,34.648,rs2014149,-0.008  
2,34.703,rs2865931,-0.007  
2,34.746,rs11895101,-0.003  
2,34.757,rs2049681,-0.003  
2,34.768,rs4670006,-0.003  
2,34.775,rs4668834,-0.003  
2,34.809,rs2015245,-0.004  
2,35.045,rs6432491,-0.015  
2,35.053,rs7577131,-0.015  
2,35.098,rs6740792,-0.017  
2,35.234,rs1430805,-0.023  
2,35.349,rs13391879,-0.024  
2,35.571,rs1469017,-0.029  
2,35.812,rs918359,-0.033  
2,36.030,rs16862519,-0.037  
2,36.550,rs13029846,-0.039  
2,36.841,rs807624,-0.038  
2,36.922,rs7579979,-0.034  
2,36.956,rs11693212,-0.029  
2,37.031,rs16862954,-0.019  
2,37.041,rs6746441,-0.019  
2,37.084,rs6431733,-0.023  
2,37.184,rs6706165,-0.033  
2,37.277,rs10185339,-0.050  
2,37.282,rs2380680,-0.050  
2,37.336,rs7595922,-0.055  
2,37.508,rs2559069,-0.086  
2,37.523,rs10495647,-0.087  
2,37.733,rs6716344,-0.107  
2,37.761,rs6735681,-0.105  
2,37.798,rs9287666,-0.107  
2,37.833,rs1365966,-0.106  
2,37.866,rs6735335,-0.095  
2,37.906,rs10194143,-0.092  
2,37.922,rs6727571,-0.099  
2,37.952,rs10186232,-0.093  
2,38.397,rs4047462,-0.171  
2,38.451,rs1567965,-0.181  
2,38.483,rs340724,-0.147  
2,38.555,rs7564195,-0.128  
2,38.634,rs340749,-0.122  
2,38.897,rs919432,-0.111  
2,38.964,rs983249,-0.120  
2,39.009,rs1430060,-0.114  
2,39.426,rs7425164,-0.067  
2,39.438,rs6723770,-0.054  
2,39.441,rs10167880,-0.063  
2,39.611,rs2111873,-0.034  
2,39.617,rs534990,-0.034  
2,39.623,rs2341997,-0.033  
2,39.736,rs12615806,-0.017  
2,39.766,rs10490431,-0.015  
2,39.844,rs1515987,-0.011  
2,39.896,rs1515972,-0.010  
2,39.939,rs1546620,-0.016  
2,39.991,rs1471342,-0.014  
2,40.166,rs2732922,-0.013

2,40.219,rs2345097,-0.011  
2,40.307,rs4075511,-0.009  
2,40.319,rs6759244,-0.009  
2,40.403,rs2345102,-0.008  
2,40.418,rs6738939,-0.008  
2,40.561,rs2345505,-0.004  
2,40.601,rs1377081,-0.003  
2,40.949,rs1516903,-0.000  
2,40.971,rs17389100,0.000  
2,41.015,rs16984751,0.000  
2,41.075,rs13026592,0.000  
2,41.094,rs3912722,-0.000  
2,41.100,rs10168276,0.000  
2,41.101,rs7589253,0.000  
2,41.113,rs10174485,0.001  
2,41.117,rs16985153,0.001  
2,41.127,rs4119150,0.002  
2,41.134,rs16985176,0.006  
2,41.143,rs2272519,0.009  
2,41.144,rs4832602,0.009  
2,41.237,rs2881318,0.007  
2,41.286,rs10173922,0.010  
2,41.345,rs4240224,0.016  
2,41.380,rs7562720,0.004  
2,41.410,rs12990630,0.005  
2,41.460,rs16985823,0.007  
2,41.519,rs1574072,0.006  
2,41.538,rs4233760,0.006  
2,41.539,rs4233762,0.006  
2,41.553,rs4358083,0.007  
2,41.574,rs12105891,0.006  
2,41.663,rs10209041,0.003  
2,41.672,rs703316,0.003  
2,41.706,rs851066,0.001  
2,41.755,rs703297,0.000  
2,41.781,rs824466,0.001  
2,41.790,rs824498,0.000  
2,41.807,rs4666489,0.000  
2,41.810,rs824446,0.000  
2,41.815,rs6705213,0.001  
2,41.877,rs6757410,0.000  
2,41.904,rs17686199,0.000  
2,41.911,rs1820584,0.000  
2,42.206,rs6531191,-0.002  
2,42.295,rs6733236,-0.001  
2,42.528,rs7601531,-0.001  
2,42.634,rs10495699,-0.001  
2,42.840,rs10184780,0.000  
2,43.569,rs907865,-0.000  
2,43.587,rs10170811,-0.000  
2,43.676,rs7607854,0.000  
2,43.747,rs10856796,0.001  
2,43.771,rs6749689,0.002  
2,43.784,rs3771254,0.002  
2,43.836,rs1043419,0.002  
2,44.046,rs6710671,0.002  
2,44.106,rs12467895,0.003  
2,44.119,rs11898154,0.002  
2,44.145,rs4666412,0.000  
2,44.157,rs342076,-0.000  
2,44.162,rs342138,-0.001

2,44.187,rs2289084,-0.000  
2,44.205,rs6728591,-0.000  
2,44.215,rs2082873,-0.000  
2,44.225,rs6717824,-0.001  
2,44.230,rs16987836,-0.001  
2,44.264,rs921599,-0.001  
2,44.311,rs934601,-0.005  
2,44.322,rs11680086,-0.008  
2,44.331,rs2304423,-0.011  
2,44.354,rs1013363,-0.011  
2,44.370,rs746776,-0.014  
2,44.371,rs11678116,-0.014  
2,44.373,rs7255,-0.014  
2,44.390,rs340600,-0.011  
2,44.445,rs564125,-0.010  
2,44.583,rs6709100,-0.011  
2,44.602,rs7571978,-0.011  
2,44.633,rs1002755,-0.010  
2,44.701,rs4533439,-0.008  
2,44.758,rs4665639,-0.014  
2,44.759,rs7558478,-0.014  
2,44.814,rs693,-0.022  
2,44.891,rs571468,-0.037  
2,44.906,rs11886946,-0.036  
2,45.099,rs13398007,-0.027  
2,45.114,rs870638,-0.018  
2,45.156,rs6739502,-0.040  
2,45.206,rs219555,-0.033  
2,45.309,rs6749957,-0.044  
2,45.318,rs890081,-0.043  
2,45.511,rs6547818,-0.037  
2,45.555,rs1901346,-0.039  
2,45.564,rs7568769,-0.039  
2,45.742,rs4666291,-0.053  
2,45.916,rs328539,-0.071  
2,46.019,rs2176472,-0.074  
2,46.037,rs1607267,-0.075  
2,46.087,rs11904182,-0.089  
2,46.110,rs8179610,-0.094  
2,46.134,rs7425479,-0.091  
2,46.207,rs1396725,-0.083  
2,46.340,rs4299360,-0.066  
2,46.496,rs3924202,-0.052  
2,46.632,rs2001427,-0.053  
2,46.666,rs7566648,-0.053  
2,46.675,rs17321444,-0.053  
2,46.748,rs10189050,-0.053  
2,46.931,rs2681017,-0.041  
2,46.977,rs7572707,-0.039  
2,47.105,rs2592762,-0.043  
2,47.127,rs6718240,-0.045  
2,47.130,rs2592759,-0.045  
2,47.142,rs10495737,-0.045  
2,47.201,rs4143808,-0.040  
2,47.278,rs7557676,-0.039  
2,47.293,rs6734383,-0.039  
2,47.430,rs896020,-0.037  
2,47.626,rs12478810,-0.040  
2,47.632,rs7587361,-0.040  
2,47.693,rs2577710,-0.035  
2,47.712,rs875077,-0.023

2,47.712,rs2723129,-0.023  
2,47.779,rs1530045,-0.016  
2,47.786,rs6742202,-0.014  
2,47.788,rs1653763,-0.018  
2,47.796,rs748860,-0.026  
2,47.800,rs1653786,-0.018  
2,47.801,rs4665609,-0.018  
2,47.804,rs1709339,-0.017  
2,47.824,rs543012,-0.027  
2,47.841,rs17045819,-0.029  
2,47.931,rs11902184,-0.041  
2,47.946,rs10865262,-0.041  
2,47.975,rs7589373,-0.026  
2,47.980,rs10208038,-0.018  
2,47.983,rs713587,-0.007  
2,47.983,rs17046751,-0.011  
2,47.988,rs10189702,-0.014  
2,47.990,rs2304429,-0.016  
2,48.022,rs7594432,-0.021  
2,48.033,rs11683424,-0.026  
2,48.074,rs12999687,-0.025  
2,48.209,rs10196664,-0.031  
2,48.224,rs730072,-0.046  
2,48.325,rs2292225,-0.061  
2,48.326,rs7583475,-0.061  
2,48.413,rs6751254,-0.084  
2,48.453,rs9309386,-0.090  
2,48.476,rs499728,-0.089  
2,48.592,rs11126114,-0.085  
2,48.698,rs858648,-0.084  
2,48.784,rs12713638,-0.066  
2,48.841,rs890682,-0.068  
2,48.955,rs11685550,-0.069  
2,49.325,rs12990137,-0.073  
2,49.470,rs1025542,-0.098  
2,49.646,rs10211527,-0.161  
2,49.662,rs2272071,-0.166  
2,49.683,rs13004993,-0.173  
2,49.716,rs7592534,-0.188  
2,49.760,rs4665871,-0.208  
2,49.829,rs2280513,-0.234  
2,49.961,rs1009221,-0.243  
2,50.029,rs2384463,-0.311  
2,50.435,rs1275513,-0.279  
2,50.488,rs13408493,-0.291  
2,50.652,rs11692692,-0.328  
2,50.843,rs13409819,-0.335  
2,50.910,rs7349418,-0.403  
2,50.940,rs7567409,-0.423  
2,51.009,rs4358081,-0.627  
2,51.311,rs6739684,-0.862  
2,51.366,rs7577483,-0.901  
2,51.389,rs1562392,-0.912  
2,51.439,rs7568662,-0.952  
2,51.483,rs12619049,-0.954  
2,51.489,rs6744522,-0.949  
2,51.502,rs1104869,-0.946  
2,51.504,rs4666183,-0.945  
2,51.803,rs4146673,-0.932  
2,51.836,rs1534544,-0.925  
2,51.891,rs7591913,-0.914

2,51.903,rs7590571,-0.914  
2,52.032,rs4346337,-0.986  
2,52.230,rs4666243,-1.042  
2,52.249,rs7567732,-1.043  
2,52.297,rs6547949,-1.041  
2,52.306,rs13014477,-1.040  
2,52.322,rs6757945,-1.040  
2,52.334,rs4381747,-1.039  
2,52.345,rs4630725,-1.040  
2,52.473,rs2339540,-1.007  
2,52.600,rs6547972,-0.952  
2,52.836,rs2339475,-0.850  
2,52.846,rs10495770,-0.844  
2,52.866,rs6709517,-0.840  
2,52.944,rs4265970,-0.900  
2,53.020,rs7574859,-0.928  
2,53.128,rs10201541,-0.891  
2,53.175,rs6718327,-0.873  
2,53.269,rs2361743,-0.894  
2,53.300,rs6723731,-0.901  
2,53.327,rs10203090,-0.910  
2,53.340,rs10165223,-0.912  
2,53.497,rs1345151,-0.912  
2,53.557,rs966498,-0.885  
2,53.578,rs4334534,-0.889  
2,53.600,rs6718106,-0.847  
2,53.628,rs2362540,-0.814  
2,53.672,rs2362541,-0.782  
2,53.777,rs13014895,-0.634  
2,53.792,rs4563275,-0.611  
2,53.840,rs6740257,-0.584  
2,53.891,rs7583194,-0.545  
2,53.940,rs2076932,-0.539  
2,53.967,rs13391574,-0.557  
2,54.318,rs4952002,-0.613  
2,54.391,rs2593477,-0.652  
2,54.437,rs472161,-0.654  
2,54.493,rs1715819,-0.653  
2,54.515,rs2926304,-0.608  
2,54.520,rs6739240,-0.601  
2,54.530,rs551356,-0.584  
2,54.548,rs17396800,-0.621  
2,54.662,rs2364430,-0.670  
2,54.689,rs2194452,-0.672  
2,54.732,rs1559497,-0.675  
2,54.843,rs2303325,-0.701  
2,54.885,rs4952017,-0.694  
2,54.954,rs6543594,-0.740  
2,55.013,rs11681174,-0.736  
2,55.064,rs4951964,-0.721  
2,55.119,rs11888670,-0.722  
2,55.147,rs2194463,-0.744  
2,55.213,rs7560152,-0.789  
2,55.275,rs12992405,-0.731  
2,55.327,rs11681503,-0.682  
2,55.343,rs4952069,-0.670  
2,55.348,rs13386968,-0.655  
2,55.358,rs601255,-0.624  
2,55.361,rs605832,-0.607  
2,55.369,rs1540926,-0.629  
2,55.387,rs6543624,-0.734



2,55.390,rs11896460,-0.748  
2,55.395,rs4276068,-0.773  
2,55.400,rs1560268,-0.739  
2,55.403,rs207423,-0.712  
2,55.406,rs932559,-0.713  
2,55.410,rs207444,-0.709  
2,55.477,rs2365778,-0.637  
2,55.648,rs7559329,-0.626  
2,55.974,rs9308929,-0.655  
2,55.982,rs7570685,-0.656  
2,56.003,rs4952315,-0.635  
2,56.008,rs6728021,-0.631  
2,56.008,rs7607940,-0.631  
2,56.056,rs4952280,-0.600  
2,56.086,rs219206,-0.602  
2,56.093,rs3769554,-0.604  
2,56.108,rs10490453,-0.606  
2,56.255,rs218197,-0.606  
2,56.279,rs6705263,-0.595  
2,56.367,rs6712473,-0.547  
2,56.515,rs3754829,-0.587  
2,56.588,rs723042,-0.582  
2,56.681,rs7566302,-0.584  
2,56.701,rs6742198,-0.549  
2,56.717,rs6757228,-0.523  
2,56.730,rs2034693,-0.519  
2,56.782,rs4092337,-0.514  
2,56.800,rs604788,-0.505  
2,56.807,rs654291,-0.448  
2,56.832,rs6543714,-0.423  
2,56.867,rs2367735,-0.385  
2,56.869,rs4670574,-0.382  
2,56.870,rs6543716,-0.342  
2,56.880,rs17013129,-0.280  
2,56.889,rs7561821,-0.258  
2,56.962,rs11685011,-0.276  
2,56.987,rs4258776,-0.278  
2,57.040,rs13388224,-0.256  
2,57.167,rs13386750,-0.205  
2,57.247,rs7585514,-0.175  
2,57.257,rs7574123,-0.171  
2,57.289,rs2367957,-0.164  
2,57.360,rs17338700,-0.144  
2,57.375,rs6714970,-0.141  
2,57.384,rs6735386,-0.152  
2,57.424,rs6738183,-0.149  
2,57.430,rs7572718,-0.172  
2,57.619,rs1718718,-0.175  
2,57.704,rs13410163,-0.202  
2,57.718,rs1559644,-0.206  
2,57.790,rs9284729,-0.210  
2,57.819,rs13033324,-0.212  
2,57.851,rs745007,-0.233  
2,57.883,rs6750420,-0.239  
2,57.906,rs2059443,-0.234  
2,57.930,rs10495810,-0.220  
2,57.956,rs1364690,-0.205  
2,58.119,rs10177156,-0.184  
2,58.222,rs13005810,-0.201  
2,58.238,rs10204349,-0.205  
2,58.323,rs892458,-0.213

2,58.431,rs11124380,-0.196  
2,58.472,rs3845770,-0.170  
2,58.494,rs1220211,-0.172  
2,58.510,rs10203553,-0.169  
2,58.581,rs9917264,-0.155  
2,58.604,rs1527616,-0.171  
2,58.608,rs11683103,-0.172  
2,58.643,rs6543865,-0.162  
2,58.649,rs3115248,-0.161  
2,58.684,rs3108124,-0.169  
2,58.699,rs4471866,-0.172  
2,58.817,rs280754,-0.199  
2,58.853,rs280768,-0.199  
2,58.935,rs6760654,-0.196  
2,59.050,rs12712411,-0.191  
2,59.207,rs13403909,-0.166  
2,59.418,rs7590663,-0.187  
2,59.434,rs4624361,-0.186  
2,59.523,rs4560089,-0.202  
2,59.558,rs11679130,-0.213  
2,59.733,rs7578143,-0.280  
2,59.737,rs925910,-0.280  
2,59.815,rs6711702,-0.333  
2,59.862,rs833760,-0.366  
2,59.889,rs2634806,-0.387  
2,59.893,rs1397443,-0.386  
2,59.897,rs1510728,-0.385  
2,59.942,rs305175,-0.341  
2,59.957,rs1167463,-0.395  
2,59.969,rs1167436,-0.399  
2,60.093,rs2699187,-0.386  
2,60.100,rs12712488,-0.384  
2,60.204,rs17407386,-0.357  
2,60.211,rs7569878,-0.359  
2,60.223,rs7608543,-0.362  
2,60.242,rs7584784,-0.358  
2,60.385,rs4670551,-0.333  
2,60.462,rs3770911,-0.271  
2,60.515,rs848504,-0.267  
2,60.603,rs3755206,-0.265  
2,60.674,rs6720433,-0.263  
2,60.917,rs848642,-0.231  
2,61.093,rs918066,-0.235  
2,61.127,rs12612163,-0.236  
2,61.233,rs759433,-0.235  
2,61.261,rs6732843,-0.236  
2,61.377,rs10182004,-0.236  
2,61.377,rs13029062,-0.232  
2,61.378,rs1990640,-0.197  
2,61.381,rs11691187,-0.174  
2,61.386,rs6744274,-0.165  
2,61.392,rs4670166,-0.155  
2,61.410,rs10207138,-0.156  
2,61.504,rs2252032,-0.175  
2,61.606,rs1007823,-0.175  
2,61.709,rs4648202,-0.182  
2,61.780,rs10206380,-0.188  
2,61.887,rs2373000,-0.183  
2,61.920,rs6544074,-0.179  
2,61.993,rs6544086,-0.199  
2,61.998,rs10199137,-0.201

2,62.146,rs6544093,-0.165  
2,62.303,rs2058403,-0.148  
2,62.425,rs13401336,-0.144  
2,62.485,rs2373292,-0.142  
2,62.500,rs10207574,-0.142  
2,62.649,rs3845787,-0.142  
2,62.673,rs12471294,-0.142  
2,62.747,rs6748492,-0.132  
2,62.840,rs7562836,-0.137  
2,62.881,rs867574,-0.143  
2,62.891,rs6727303,-0.153  
2,62.899,rs2373305,-0.163  
2,62.916,rs6738882,-0.166  
2,62.983,rs766231,-0.174  
2,63.259,rs10181021,-0.179  
2,63.508,rs400681,-0.223  
2,63.556,rs7608905,-0.227  
2,63.564,rs3911040,-0.256  
2,63.589,rs4670858,-0.251  
2,63.596,rs1152,-0.249  
2,63.664,rs10198160,-0.232  
2,63.691,rs7568053,-0.212  
2,63.711,rs1368112,-0.210  
2,63.758,rs17421154,-0.275  
2,63.798,rs12328034,-0.283  
2,63.841,rs453182,-0.292  
2,63.853,rs7578356,-0.303  
2,63.864,rs17023025,-0.315  
2,63.867,rs6733848,-0.318  
2,63.880,rs6751481,-0.331  
2,63.923,rs7603676,-0.325  
2,64.024,rs3112165,-0.298  
2,64.465,rs7577097,-0.229  
2,64.509,rs10210842,-0.221  
2,64.530,rs6712583,-0.221  
2,64.657,rs2110658,-0.215  
2,64.674,rs2716726,-0.218  
2,64.699,rs6722610,-0.216  
2,64.768,rs9679549,-0.216  
2,64.771,rs1541564,-0.216  
2,64.836,rs11124710,-0.208  
2,64.847,rs720796,-0.176  
2,64.922,rs11891674,-0.153  
2,64.958,rs4952441,-0.130  
2,64.963,rs12619775,-0.128  
2,65.006,rs2192919,-0.112  
2,65.026,rs373857,-0.104  
2,65.078,rs381797,-0.114  
2,65.088,rs17025732,-0.117  
2,65.110,rs10210665,-0.129  
2,65.114,rs2110743,-0.131  
2,65.133,rs11890040,-0.138  
2,65.134,rs12712691,-0.138  
2,65.173,rs13414307,-0.144  
2,65.210,rs4952630,-0.143  
2,65.243,rs7561779,-0.142  
2,65.246,rs9309056,-0.142  
2,65.267,rs42822,-0.133  
2,65.331,rs2888698,-0.109  
2,65.413,rs17026752,-0.084  
2,65.561,rs7562658,-0.059

2,65.573,rs9309065,-0.035  
2,65.626,rs17027360,-0.007  
2,65.627,rs1441234,-0.007  
2,65.656,rs12712748,-0.007  
2,65.922,rs7603075,-0.019  
2,66.072,rs17028447,-0.025  
2,66.121,rs7563359,-0.027  
2,66.163,rs4381822,-0.027  
2,66.184,rs7599875,-0.028  
2,66.192,rs17028747,-0.028  
2,66.195,rs4414724,-0.028  
2,66.300,rs4952521,-0.006  
2,66.312,rs4632397,-0.005  
2,66.340,rs7601644,-0.005  
2,66.409,rs4952548,-0.003  
2,66.478,rs12617564,-0.003  
2,66.560,rs11898187,-0.004  
2,66.595,rs6737623,-0.005  
2,66.607,rs6748687,-0.005  
2,66.651,rs7570219,-0.007  
2,66.697,rs4453730,-0.009  
2,66.857,rs2302346,-0.013  
2,66.971,rs10495897,-0.011  
2,67.306,rs6717144,-0.009  
2,67.506,rs6732045,-0.005  
2,67.623,rs13020622,-0.007  
2,67.624,rs3842996,-0.007  
2,67.669,rs13429058,-0.006  
2,67.673,rs2166500,-0.006  
2,67.808,rs11686640,-0.014  
2,67.819,rs2166503,-0.014  
2,67.823,rs4953713,-0.021  
2,67.846,rs10175942,-0.024  
2,67.936,rs2374482,-0.030  
2,67.965,rs1446571,-0.023  
2,67.995,rs4952967,-0.017  
2,68.090,rs2374525,-0.011  
2,68.206,rs13002812,-0.009  
2,68.314,rs13026309,-0.005  
2,68.329,rs11900952,-0.005  
2,68.404,rs3901678,-0.005  
2,68.495,rs6724325,-0.002  
2,68.585,rs6716551,-0.000  
2,68.709,rs1368087,-0.000  
2,68.902,rs4245786,-0.001  
2,68.963,rs4952689,-0.001  
2,68.964,rs4953028,-0.001  
2,68.967,rs6544718,-0.001  
2,69.019,rs4953037,-0.001  
2,69.174,rs7565864,-0.010  
2,69.218,rs4953063,-0.007  
2,69.263,rs7593878,-0.007  
2,69.276,rs12465678,-0.007  
2,69.465,rs7580016,-0.006  
2,69.854,rs1437747,-0.006  
2,69.877,rs473449,-0.007  
2,69.906,rs343974,-0.007  
2,70.045,rs4953133,-0.010  
2,70.085,rs341605,-0.008  
2,70.121,rs11674185,-0.006  
2,70.134,rs737448,-0.006

2,70.209,rs2673270,-0.001  
2,70.229,rs1983312,-0.000  
2,70.301,rs2959265,-0.000  
2,70.307,rs17032940,-0.000  
2,70.312,rs13005516,-0.000  
2,70.328,rs1447107,-0.000  
2,70.338,rs13410828,-0.001  
2,70.344,rs4355165,-0.001  
2,70.357,rs12618367,-0.002  
2,70.373,rs2959232,-0.002  
2,70.382,rs908571,-0.003  
2,70.406,rs12464646,-0.006  
2,70.411,rs11896942,-0.006  
2,70.415,rs1517024,-0.007  
2,70.415,rs6707629,-0.007  
2,70.465,rs1356339,-0.021  
2,70.466,rs12712937,-0.022  
2,70.482,rs3914642,-0.026  
2,70.486,rs6720296,-0.027  
2,70.490,rs2342702,-0.028  
2,70.504,rs10196185,-0.028  
2,70.512,rs2343408,-0.031  
2,70.536,rs3908093,-0.044  
2,70.543,rs883834,-0.042  
2,70.577,rs929902,-0.030  
2,70.592,rs7605521,-0.023  
2,70.628,rs883413,-0.012  
2,70.644,rs7575803,-0.004  
2,70.683,rs11689571,-0.010  
2,71.088,rs3770283,-0.007  
2,71.372,rs7599740,-0.014  
2,71.449,rs1589039,-0.007  
2,71.612,rs506134,-0.007  
2,71.644,rs6746467,-0.005  
2,71.702,rs952331,-0.002  
2,71.719,rs4953245,-0.004  
2,71.726,rs940052,-0.002  
2,71.727,rs6716622,-0.002  
2,71.739,rs7582320,0.000  
2,71.772,rs4264601,-0.000  
2,71.783,rs7558342,-0.001  
2,71.797,rs6720975,-0.005  
2,71.824,rs4953262,-0.004  
2,71.832,rs7596891,-0.007  
2,71.838,rs11125034,-0.014  
2,71.839,rs7559522,-0.015  
2,71.883,rs6756452,-0.013  
2,71.917,rs1966813,-0.012  
2,71.921,rs2122110,-0.012  
2,72.066,rs7578578,-0.027  
2,72.079,rs2711299,-0.027  
2,72.135,rs4953292,-0.019  
2,72.141,rs7607360,-0.019  
2,72.203,rs2245633,-0.020  
2,72.398,rs13405039,-0.013  
2,72.409,rs6742737,-0.012  
2,72.435,rs12467673,-0.013  
2,72.474,rs3768757,-0.028  
2,72.478,rs3754573,-0.029  
2,72.585,rs3754568,-0.034  
2,72.636,rs3820729,-0.031

2,72.652,rs281476,-0.031  
2,72.671,rs281489,-0.033  
2,72.671,rs882586,-0.033  
2,72.703,rs4953334,-0.048  
2,72.708,rs4337520,-0.047  
2,72.716,rs11688133,-0.044  
2,72.716,rs13027413,-0.044  
2,72.724,rs2881321,-0.035  
2,72.726,rs7589968,-0.034  
2,72.736,rs12617123,-0.027  
2,72.742,rs1000531,-0.025  
2,72.761,rs2121266,-0.019  
2,72.767,rs7571879,-0.019  
2,72.771,rs6720535,-0.018  
2,72.780,rs6758592,-0.016  
2,72.840,rs17035106,-0.013  
2,72.932,rs896210,-0.010  
2,73.046,rs4953408,-0.017  
2,73.145,rs11125091,-0.017  
2,73.154,rs7577004,-0.016  
2,73.182,rs1374274,-0.023  
2,73.200,rs6713911,-0.037  
2,73.207,rs9225,-0.040  
2,73.218,rs7586009,-0.042  
2,73.256,rs3087857,-0.035  
2,73.335,rs2163982,-0.029  
2,73.341,rs6713052,-0.028  
2,73.392,rs1474396,-0.033  
2,73.395,rs3739098,-0.033  
2,73.425,rs7596776,-0.019  
2,73.501,rs904166,-0.017  
2,73.532,rs13002829,-0.015  
2,73.551,rs904162,-0.014  
2,73.559,rs10206550,-0.012  
2,73.561,rs10168995,-0.011  
2,73.574,rs4245814,-0.007  
2,73.596,rs10865224,-0.003  
2,73.600,rs13388259,-0.002  
2,73.625,rs1126497,-0.003  
2,73.722,rs17036636,-0.001  
2,73.772,rs6752504,-0.001  
2,73.778,rs11125144,-0.002  
2,73.781,rs4953503,-0.002  
2,73.793,rs6744530,-0.004  
2,73.810,rs4953514,-0.005  
2,73.833,rs7559733,-0.002  
2,73.851,rs6742794,-0.006  
2,73.869,rs9309149,-0.013  
2,73.878,rs9789343,-0.014  
2,73.900,rs2348238,-0.016  
2,73.906,rs797703,-0.016  
2,73.934,rs441327,-0.016  
2,74.259,rs7570354,-0.041  
2,74.346,rs2471403,-0.038  
2,74.528,rs4561709,-0.062  
2,74.533,rs10185212,-0.064  
2,74.604,rs3792234,-0.079  
2,74.615,rs2140551,-0.097  
2,74.697,rs1404057,-0.091  
2,74.709,rs7579411,-0.092  
2,74.730,rs4131885,-0.103

2,74.765,rs7574612,-0.109  
2,74.768,rs4256003,-0.129  
2,74.801,rs4482537,-0.132  
2,74.851,rs10490126,-0.151  
2,74.857,rs7579295,-0.152  
2,74.858,rs17037747,-0.152  
2,74.862,rs4953640,-0.154  
2,74.870,rs1024779,-0.160  
2,74.897,rs6706144,-0.177  
2,74.901,rs17500266,-0.179  
2,74.920,rs12713027,-0.185  
2,75.060,rs1504179,-0.173  
2,75.100,rs12713042,-0.125  
2,75.212,rs7557485,-0.134  
2,75.283,rs1405959,-0.144  
2,75.399,rs1995172,-0.138  
2,75.458,rs7564547,-0.136  
2,75.561,rs1518823,-0.131  
2,75.567,rs870168,-0.131  
2,75.595,rs7586200,-0.135  
2,75.618,rs925931,-0.139  
2,75.671,rs1156742,-0.172  
2,75.722,rs17491881,-0.178  
2,75.751,rs13417424,-0.176  
2,75.815,rs4971552,-0.173  
2,75.946,rs1715970,-0.188  
2,76.075,rs9678669,-0.226  
2,76.123,rs7590358,-0.242  
2,76.154,rs6706713,-0.253  
2,76.178,rs7581256,-0.233  
2,76.226,rs10177104,-0.217  
2,76.230,rs2351767,-0.186  
2,76.250,rs17040897,-0.213  
2,76.269,rs13391995,-0.225  
2,76.271,rs2194385,-0.226  
2,76.279,rs2048979,-0.229  
2,76.285,rs719645,-0.231  
2,76.356,rs10202039,-0.261  
2,76.391,rs9309199,-0.277  
2,76.444,rs2193225,-0.282  
2,76.550,rs12616790,-0.273  
2,76.598,rs988982,-0.268  
2,76.629,rs735315,-0.265  
2,76.765,rs1115763,-0.257  
2,76.782,rs10490145,-0.256  
2,76.829,rs6717556,-0.257  
2,76.958,rs9789477,-0.239  
2,76.984,rs12612083,-0.237  
2,77.036,rs12478948,-0.265  
2,77.037,rs17862718,-0.265  
2,77.166,rs1516191,-0.244  
2,77.246,rs3850342,-0.240  
2,77.252,rs10207610,-0.240  
2,77.349,rs892911,-0.240  
2,77.382,rs11125398,-0.240  
2,77.395,rs6545251,-0.244  
2,77.463,rs10181636,-0.267  
2,77.533,rs2103389,-0.267  
2,77.576,rs17042637,-0.273  
2,77.597,rs2178649,-0.275  
2,77.606,rs2141844,-0.276

2,77.619,rs12621157,-0.275  
2,77.650,rs2727892,-0.284  
2,77.652,rs12464727,-0.285  
2,77.733,rs7586951,-0.306  
2,77.817,rs11125431,-0.340  
2,77.913,rs4672216,-0.382  
2,77.945,rs17043190,-0.388  
2,77.999,rs1823887,-0.398  
2,78.115,rs17043720,-0.408  
2,78.168,rs7602023,-0.399  
2,78.186,rs6756739,-0.395  
2,78.305,rs1424969,-0.428  
2,78.319,rs17044122,-0.431  
2,78.332,rs2034254,-0.438  
2,78.335,rs17189210,-0.441  
2,78.355,rs13021753,-0.473  
2,78.399,rs6756317,-0.431  
2,78.418,rs4671212,-0.415  
2,78.492,rs4557020,-0.374  
2,78.657,rs6717369,-0.349  
2,78.781,rs11674173,-0.358  
2,78.811,rs11677058,-0.361  
2,78.941,rs7601625,-0.398  
2,78.980,rs2920881,-0.404  
2,79.016,rs10496038,-0.409  
2,79.070,rs14026,-0.420  
2,79.128,rs17432234,-0.431  
2,79.165,rs1047948,-0.437  
2,79.449,rs2586949,-0.441  
2,79.464,rs7594497,-0.440  
2,79.475,rs782606,-0.440  
2,79.545,rs7568378,-0.422  
2,79.580,rs10496053,-0.412  
2,79.604,rs4672074,-0.405  
2,79.743,rs6545534,-0.498  
2,79.784,rs13418952,-0.502  
2,79.872,rs929689,-0.507  
2,79.894,rs6545554,-0.507  
2,79.907,rs4672095,-0.498  
2,79.927,rs6728383,-0.518  
2,79.938,rs2869526,-0.528  
2,79.942,rs2216325,-0.527  
2,79.961,rs17047655,-0.524  
2,79.976,rs759615,-0.522  
2,80.037,rs12616518,-0.518  
2,80.060,rs2193481,-0.517  
2,80.071,rs6714635,-0.511  
2,80.082,rs13423780,-0.503  
2,80.095,rs10191130,-0.492  
2,80.107,rs17047897,-0.489  
2,80.208,rs6718973,-0.467  
2,80.466,rs7600489,-0.499  
2,80.586,rs17048563,-0.508  
2,80.655,rs1116357,-0.512  
2,80.912,rs11125711,-0.502  
2,80.965,rs6743780,-0.493  
2,80.991,rs2203805,-0.494  
2,81.231,rs1405824,-0.519  
2,81.253,rs1405826,-0.519  
2,81.360,rs11125728,-0.514  
2,81.366,rs10496077,-0.508



2,81.374,rs10180540,-0.463  
2,81.398,rs6722461,-0.441  
2,81.696,rs1851140,-0.409  
2,81.762,rs12986742,-0.436  
2,82.005,rs10182324,-0.433  
2,82.194,rs2192692,-0.413  
2,82.228,rs6758100,-0.437  
2,82.330,rs10490100,-0.387  
2,82.376,rs2192567,-0.369  
2,82.385,rs1990558,-0.365  
2,82.387,rs5008666,-0.363  
2,82.399,rs4325734,-0.362  
2,82.410,rs12622464,-0.362  
2,82.451,rs4432437,-0.366  
2,82.485,rs12464531,-0.354  
2,82.539,rs6740378,-0.315  
2,82.544,rs1035102,-0.314  
2,82.546,rs2539669,-0.314  
2,82.551,rs6545742,-0.313  
2,82.561,rs6545745,-0.309  
2,82.655,rs11125812,-0.265  
2,82.670,rs1019264,-0.265  
2,82.671,rs722889,-0.265  
2,82.711,rs2419402,-0.264  
2,82.727,rs17400093,-0.263  
2,82.759,rs17050495,-0.260  
2,82.932,rs7607085,-0.244  
2,82.989,rs1861151,-0.248  
2,83.382,rs907574,-0.210  
2,83.400,rs7597268,-0.215  
2,83.416,rs7567242,-0.215  
2,83.430,rs243083,-0.215  
2,83.446,rs4672388,-0.226  
2,83.534,rs13028240,-0.201  
2,83.566,rs10184550,-0.194  
2,83.575,rs1896297,-0.194  
2,83.635,rs356982,-0.180  
2,83.705,rs842767,-0.182  
2,83.724,rs881952,-0.170  
2,83.746,rs10198826,-0.158  
2,83.803,rs7576218,-0.141  
2,83.894,rs6545832,-0.138  
2,83.981,rs1534648,-0.130  
2,84.356,rs3943540,-0.149  
2,84.389,rs6719628,-0.155  
2,84.427,rs6714411,-0.162  
2,84.429,rs4672482,-0.162  
2,84.458,rs7584792,-0.172  
2,84.627,rs6742894,-0.183  
2,84.671,rs4350731,-0.221  
2,84.671,rs11686508,-0.216  
2,84.672,rs6545946,-0.173  
2,84.674,rs4608500,-0.199  
2,84.676,rs1527966,-0.199  
2,84.681,rs360791,-0.199  
2,84.759,rs11125954,-0.178  
2,84.821,rs6546024,-0.171  
2,84.872,rs329483,-0.149  
2,84.874,rs2917793,-0.129  
2,84.875,rs17028375,-0.130  
2,84.890,rs2217968,-0.168

2,84.893,rs11125993,-0.174  
2,84.974,rs2433384,-0.173  
2,85.306,rs1346236,-0.193  
2,85.334,rs10496112,-0.198  
2,85.384,rs11685822,-0.222  
2,85.398,rs13391261,-0.235  
2,85.482,rs6546073,-0.279  
2,85.538,rs13002043,-0.267  
2,85.685,rs17700924,-0.268  
2,85.888,rs6546095,-0.266  
2,86.092,rs702874,-0.263  
2,86.097,rs10469881,-0.264  
2,86.099,rs929698,-0.264  
2,86.103,rs6704589,-0.266  
2,86.238,rs13026295,-0.280  
2,86.248,rs7573247,-0.305  
2,86.259,rs4296412,-0.298  
2,86.274,rs17029538,-0.295  
2,86.276,rs9678117,-0.259  
2,86.293,rs918197,-0.214  
2,86.336,rs4313965,-0.228  
2,86.369,rs4671629,-0.218  
2,86.441,rs4671635,-0.210  
2,86.503,rs6546118,-0.198  
2,86.521,rs1541580,-0.198  
2,86.630,rs1009360,-0.189  
2,86.866,rs11681377,-0.155  
2,87.058,rs268866,-0.137  
2,87.196,rs6743585,-0.103  
2,87.305,rs1194849,-0.092  
2,87.537,rs10451656,-0.067  
2,87.540,rs840947,-0.069  
2,87.554,rs10203913,-0.080  
2,87.555,rs2917816,-0.080  
2,87.631,rs3911862,-0.080  
2,87.704,rs1673443,-0.091  
2,87.724,rs13424150,-0.092  
2,87.743,rs1673459,-0.093  
2,87.847,rs1544694,-0.092  
2,87.848,rs11891634,-0.093  
2,87.848,rs17030670,-0.095  
2,87.855,rs2111464,-0.113  
2,87.877,rs3845820,-0.124  
2,87.881,rs4671140,-0.126  
2,87.944,rs3919602,-0.134  
2,87.963,rs3845821,-0.131  
2,87.992,rs2631669,-0.130  
2,88.087,rs2627857,-0.164  
2,88.100,rs984578,-0.148  
2,88.114,rs4671716,-0.155  
2,88.128,rs7600569,-0.167  
2,88.139,rs2951282,-0.175  
2,88.159,rs10196975,-0.210  
2,88.197,rs4075737,-0.228  
2,88.199,rs4671723,-0.228  
2,88.205,rs4414666,-0.229  
2,89.126,rs6716792,-0.357  
2,89.131,rs6727352,-0.365  
2,89.148,rs6722685,-0.376  
2,89.161,rs3890755,-0.364  
2,89.174,rs9789535,-0.374

2,89.181,rs2300477,-0.378  
2,89.197,rs10184250,-0.390  
2,89.204,rs6706382,-0.375  
2,89.211,rs2192963,-0.375  
2,89.240,rs6725996,-0.382  
2,89.248,rs1548900,-0.387  
2,89.327,rs6727258,-0.420  
2,89.385,rs12993985,-0.423  
2,89.386,rs7579521,-0.424  
2,89.467,rs13405122,-0.405  
2,89.658,rs4671784,-0.383  
2,89.699,rs10180549,-0.393  
2,89.784,rs1921266,-0.455  
2,89.802,rs1384741,-0.504  
2,89.868,rs6754571,-0.517  
2,89.925,rs9941589,-0.527  
2,90.324,rs658602,-0.506  
2,90.370,rs6760732,-0.530  
2,90.418,rs17033681,-0.550  
2,90.555,rs2861638,-0.554  
2,90.710,rs2861683,-0.560  
2,90.797,rs7572685,-0.563  
2,90.849,rs4671821,-0.527  
2,90.875,rs2861709,-0.531  
2,91.036,rs10519126,-0.611  
2,91.116,rs12713604,-0.684  
2,91.165,rs1430778,-0.728  
2,91.203,rs10469954,-0.752  
2,91.208,rs4308115,-0.752  
2,91.226,rs6715551,-0.717  
2,91.236,rs17034538,-0.708  
2,91.269,rs13014970,-0.736  
2,91.289,rs1032807,-0.700  
2,91.307,rs905487,-0.723  
2,91.346,rs17034835,-0.699  
2,91.357,rs7558466,-0.691  
2,91.382,rs10203061,-0.684  
2,91.422,rs4671873,-0.676  
2,91.428,rs17034987,-0.675  
2,91.440,rs17523693,-0.672  
2,91.575,rs3732042,-0.646  
2,91.582,rs6746740,-0.647  
2,91.593,rs10179521,-0.645  
2,91.603,rs6717329,-0.688  
2,91.633,rs3732046,-0.709  
2,91.677,rs7595037,-0.736  
2,91.692,rs6719948,-0.744  
2,91.869,rs4854436,-0.669  
2,91.880,rs10178143,-0.671  
2,91.948,rs4309612,-0.672  
2,91.999,rs7557267,-0.678  
2,92.003,rs7605681,-0.678  
2,92.014,rs10182268,-0.718  
2,92.022,rs2311424,-0.699  
2,92.037,rs2231344,-0.701  
2,92.074,rs10191936,-0.751  
2,92.076,rs2312070,-0.753  
2,92.081,rs10169464,-0.748  
2,92.151,rs7585796,-0.731  
2,92.152,rs6743513,-0.730  
2,92.208,rs4854538,-0.676

2,92.228,rs4241349,-0.658  
2,92.278,rs11126220,-0.623  
2,92.500,rs6758228,-0.596  
2,92.545,rs7577851,-0.596  
2,92.752,rs7563401,-0.731  
2,92.874,rs11677137,-0.773  
2,92.945,rs2464698,-0.768  
2,93.068,rs1871241,-0.767  
2,93.153,rs11681491,-0.747  
2,93.420,rs1807968,-0.673  
2,93.497,rs454305,-0.634  
2,93.560,rs428225,-0.618  
2,93.588,rs1523300,-0.658  
2,93.742,rs2108481,-0.596  
2,93.757,rs12466990,-0.589  
2,93.937,rs758062,-0.515  
2,94.262,rs10184254,-0.505  
2,94.303,rs6712273,-0.476  
2,94.344,rs2075221,-0.489  
2,94.387,rs10204437,-0.449  
2,94.396,rs2075225,-0.443  
2,94.411,rs17006471,-0.442  
2,94.643,rs3771389,-0.462  
2,94.681,rs10185490,-0.462  
2,94.746,rs2072463,-0.499  
2,94.779,rs17721027,-0.497  
2,94.781,rs2058552,-0.538  
2,94.868,rs6760496,-0.539  
2,94.948,rs13420242,-0.540  
2,95.143,rs6546674,-0.570  
2,95.257,rs1458868,-0.556  
2,95.429,rs4852771,-0.515  
2,96.107,rs13406110,-0.473  
2,96.158,rs10865385,-0.459  
2,96.165,rs4852787,-0.468  
2,96.171,rs12998057,-0.478  
2,96.214,rs6749480,-0.470  
2,96.214,rs11689987,-0.470  
2,96.250,rs11690862,-0.459  
2,96.296,rs4350773,-0.452  
2,96.367,rs2303596,-0.462  
2,96.396,rs17007067,-0.452  
2,96.406,rs10183967,-0.447  
2,96.451,rs17616999,-0.392  
2,96.467,rs1529409,-0.393  
2,96.481,rs2303606,-0.395  
2,96.533,rs227782,-0.425  
2,96.647,rs750355,-0.530  
2,96.671,rs10192575,-0.554  
2,96.740,rs1427688,-0.581  
2,96.773,rs12623780,-0.595  
2,96.795,rs6546721,-0.604  
2,96.831,rs2419778,-0.615  
2,96.939,rs10208677,-0.600  
2,96.988,rs6546731,-0.592  
2,97.147,rs7558552,-0.593  
2,97.151,rs6722569,-0.594  
2,97.288,rs1046139,-0.687  
2,97.610,rs11886257,-0.608  
2,97.677,rs11893547,-0.584  
2,97.682,rs11559241,-0.582

2,97.741,rs7609407,-0.559  
2,98.105,rs13008860,-0.438  
2,98.510,rs2689774,-0.462  
2,98.536,rs1653259,-0.464  
2,98.566,rs13415017,-0.465  
2,98.567,rs13024800,-0.465  
2,98.574,rs1618091,-0.427  
2,98.616,rs6737156,-0.419  
2,98.648,rs4852323,-0.423  
2,98.703,rs13416937,-0.425  
2,98.848,rs828867,-0.432  
2,98.876,rs828842,-0.435  
2,99.016,rs895988,-0.488  
2,99.042,rs17009774,-0.489  
2,99.057,rs2075007,-0.491  
2,99.531,rs13407946,-0.562  
2,99.540,rs205651,-0.562  
2,99.692,rs2021753,-0.616  
2,99.786,rs642247,-0.646  
2,99.830,rs680545,-0.590  
2,99.844,rs3771781,-0.595  
2,99.884,rs17010504,-0.594  
2,99.891,rs10496197,-0.590  
2,99.916,rs1002026,-0.587  
2,99.922,rs11686274,-0.593  
2,100.048,rs13012537,-0.737  
2,100.074,rs6546952,-0.765  
2,100.103,rs3771817,-0.813  
2,100.136,rs3771836,-0.810  
2,100.139,rs759588,-0.875  
2,100.151,rs3771848,-0.866  
2,100.192,rs6717216,-0.869  
2,100.199,rs980545,-0.871  
2,100.207,rs1861430,-0.872  
2,100.233,rs10490309,-0.866  
2,100.288,rs2110933,-0.854  
2,100.300,rs6749524,-0.855  
2,100.353,rs6737535,-0.789  
2,100.356,rs6546997,-0.778  
2,100.363,rs11126470,-0.759  
2,100.368,rs12611634,-0.743  
2,100.374,rs10208759,-0.789  
2,100.376,rs7564244,-0.788  
2,100.390,rs13019578,-0.784  
2,100.396,rs2588498,-0.783  
2,100.448,rs11899583,-0.760  
2,100.458,rs759255,-0.755  
2,100.488,rs917235,-0.742  
2,100.520,rs7570229,-0.732  
2,100.565,rs7560262,-0.725  
2,100.698,rs6547035,-0.703  
2,100.714,rs12612334,-0.749  
2,100.753,rs2422307,-0.739  
2,100.755,rs7588316,-0.738  
2,100.804,rs6708139,-0.721  
2,100.992,rs1405343,-0.724  
2,101.048,rs17012485,-0.725  
2,101.084,rs6730042,-0.726  
2,101.090,rs6547078,-0.730  
2,101.110,rs950291,-0.737  
2,101.121,rs1879191,-0.745

2,101.132,rs7605051,-0.709  
2,101.142,rs1401841,-0.712  
2,101.165,rs7563300,-0.717  
2,101.205,rs17012803,-0.742  
2,101.239,rs7592517,-0.743  
2,101.266,rs10203812,-0.768  
2,101.344,rs7580730,-0.808  
2,101.348,rs985812,-0.802  
2,101.368,rs1519998,-0.651  
2,101.370,rs4853265,-0.646  
2,101.375,rs10210863,-0.644  
2,101.392,rs13009537,-0.640  
2,101.396,rs7609111,-0.641  
2,101.583,rs7563917,-0.652  
2,101.683,rs13398218,-0.652  
2,101.718,rs17013760,-0.696  
2,101.742,rs4369888,-0.650  
2,101.805,rs10496205,-0.653  
2,101.882,rs1505231,-0.713  
2,101.903,rs9309515,-0.765  
2,101.920,rs424198,-0.808  
2,101.939,rs1922807,-0.831  
2,101.944,rs6749190,-0.804  
2,101.954,rs4561696,-0.779  
2,101.955,rs1882681,-0.823  
2,101.958,rs1922809,-0.834  
2,101.959,rs12614202,-0.837  
2,101.966,rs2861078,-0.837  
2,101.972,rs12713914,-0.836  
2,101.996,rs17014206,-0.835  
2,102.030,rs12713918,-0.833  
2,102.037,rs4473409,-0.834  
2,102.093,rs4485592,-0.903  
2,102.140,rs10185229,-0.941  
2,102.164,rs11676317,-0.950  
2,102.189,rs6722155,-0.950  
2,102.226,rs1586421,-0.947  
2,102.253,rs992870,-0.941  
2,102.439,rs4853368,-1.117  
2,102.451,rs7569428,-1.115  
2,102.500,rs7586511,-1.147  
2,102.572,rs17040590,-1.152  
2,102.584,rs2946582,-1.146  
2,102.667,rs4853406,-1.157  
2,102.704,rs1869083,-1.148  
2,102.821,rs2177098,-1.140  
2,103.106,rs10208925,-1.209  
2,103.177,rs17015937,-1.162  
2,103.199,rs1261234,-1.150  
2,103.222,rs10520219,-1.139  
2,103.324,rs1666768,-1.086  
2,103.340,rs10520223,-1.179  
2,103.443,rs1448212,-1.222  
2,103.470,rs2073443,-1.206  
2,103.514,rs2070708,-1.178  
2,103.522,rs7608639,-1.176  
2,103.537,rs3819315,-1.173  
2,103.545,rs1589614,-1.175  
2,103.599,rs892865,-1.172  
2,103.692,rs6710298,-1.165  
2,103.702,rs6757830,-1.171

2,103.751,rs12471468,-1.199  
2,103.807,rs10496221,-1.158  
2,103.852,rs4143799,-1.138  
2,103.885,rs2100290,-1.101  
2,103.901,rs1864548,-1.241  
2,103.907,rs17040658,-1.263  
2,103.924,rs6716273,-1.322  
2,103.937,rs11126736,-1.276  
2,103.953,rs13400937,-1.311  
2,103.955,rs3795994,-1.298  
2,103.960,rs13006976,-1.287  
2,103.964,rs17727983,-1.367  
2,103.965,rs4422182,-1.448  
2,103.966,rs13030183,-1.526  
2,103.967,rs10183482,-1.538  
2,103.971,rs955749,-1.586  
2,103.975,rs6725030,-1.598  
2,103.981,rs10496231,-1.547  
2,104.004,rs2102548,-1.443  
2,104.008,rs6734305,-1.537  
2,104.011,rs6742151,-1.564  
2,104.021,rs3755095,-1.584  
2,104.027,rs13034462,-1.560  
2,104.034,rs2916516,-1.576  
2,104.035,rs7572401,-1.600  
2,104.037,rs1816611,-1.581  
2,104.043,rs1030733,-1.581  
2,104.046,rs4591366,-1.579  
2,104.047,rs6752828,-1.578  
2,104.048,rs2974132,-1.577  
2,104.125,rs671802,-1.503  
2,105.381,rs17018689,-1.389  
2,105.467,rs318369,-1.348  
2,105.487,rs1930,-1.340  
2,105.594,rs1444541,-1.283  
2,105.602,rs6747004,-1.277  
2,105.650,rs1434076,-1.223  
2,105.659,rs2004016,-1.242  
2,105.691,rs3770310,-1.302  
2,105.700,rs3755105,-1.308  
2,105.782,rs11691644,-1.377  
2,105.788,rs1370339,-1.382  
2,105.815,rs1265750,-1.319  
2,105.928,rs2131255,-1.313  
2,106.147,rs6738160,-1.298  
2,106.313,rs2862499,-1.383  
2,106.616,rs1432155,-1.492  
2,106.853,rs10167584,-1.568  
2,106.912,rs1430726,-1.565  
2,106.979,rs4393782,-1.587  
2,107.057,rs12104529,-1.603  
2,107.345,rs10469974,-1.760  
2,107.711,rs6547486,-1.788  
2,107.751,rs1991542,-1.796  
2,107.762,rs11894010,-1.796  
2,107.763,rs11126917,-1.796  
2,107.773,rs17023719,-1.828  
2,107.782,rs1451776,-1.866  
2,107.789,rs3100111,-1.867  
2,107.813,rs17316184,-1.896  
2,107.823,rs4832067,-1.877

2,107.829,rs6737955,-1.875  
2,107.835,rs7590843,-1.871  
2,107.852,rs10496309,-1.913  
2,107.870,rs13002679,-1.943  
2,108.085,rs1529385,-1.695  
2,108.095,rs1365899,-1.689  
2,108.117,rs999401,-1.651  
2,108.164,rs9309619,-1.579  
2,108.180,rs2086175,-1.553  
2,108.268,rs1979403,-1.485  
2,108.637,rs2272514,-1.550  
2,108.691,rs2702035,-1.583  
2,108.786,rs4832135,-1.656  
2,108.897,rs17025940,-1.714  
2,108.913,rs17762406,-1.719  
2,108.998,rs2583547,-1.747  
2,109.199,rs908301,-1.717  
2,109.234,rs6732834,-1.730  
2,109.258,rs6748174,-1.733  
2,109.282,rs6737773,-1.739  
2,109.486,rs6741368,-1.782  
2,109.536,rs11690650,-1.780  
2,109.660,rs4832175,-1.713  
2,109.669,rs908307,-1.708  
2,109.745,rs6714421,-1.699  
2,109.912,rs2028900,-1.814  
2,110.054,rs2232739,-1.834  
2,110.058,rs6643,-1.828  
2,110.123,rs2164807,-1.755  
2,110.126,rs6743301,-1.756  
2,110.138,rs1465821,-1.762  
2,110.142,rs869778,-1.859  
2,110.147,rs10207756,-2.051  
2,110.159,rs11127000,-2.202  
2,110.286,rs1124686,-2.498  
2,110.328,rs9677502,-2.618  
2,110.394,rs1033287,-2.852  
2,110.451,rs6752371,-2.933  
2,110.479,rs433655,-2.940  
2,110.596,rs938487,-2.977  
2,110.622,rs4832316,-2.979  
2,111.842,rs6547750,-3.164  
2,111.925,rs1441642,-3.058  
2,111.928,rs12994970,-3.056  
2,112.015,rs13019346,-2.869  
2,112.022,rs4972052,-2.901  
2,112.032,rs7591600,-2.951  
2,112.033,rs11684168,-2.950  
2,112.037,rs4972211,-2.946  
2,112.073,rs2848122,-2.885  
2,112.075,rs2012201,-2.884  
2,112.738,rs2113418,-2.585  
2,112.776,rs2193883,-2.727  
2,112.817,rs1724120,-2.772  
2,112.839,rs2305935,-2.794  
2,112.847,rs1870340,-2.802  
2,112.859,rs11688674,-2.813  
2,112.870,rs7599598,-2.822  
2,112.992,rs10171740,-2.858  
2,113.189,rs11683207,-2.914  
2,113.194,rs6714710,-2.914



2,113.201,rs746004,-2.806  
2,113.589,rs12989231,-2.717  
2,113.662,rs11677188,-2.739  
2,113.680,rs4851839,-2.742  
2,113.690,rs12473335,-2.742  
2,113.739,rs11901562,-2.750  
2,113.818,rs937725,-2.730  
2,113.820,rs1394431,-2.712  
2,113.822,rs3769747,-2.730  
2,113.967,rs1516085,-2.810  
2,113.996,rs1028144,-2.891  
2,114.012,rs885036,-2.931  
2,114.086,rs2871244,-2.949  
2,114.104,rs1517682,-2.953  
2,114.133,rs4851169,-2.960  
2,114.483,rs3087386,-3.040  
2,114.556,rs3792119,-3.030  
2,114.564,rs3828312,-3.024  
2,114.659,rs6542889,-2.996  
2,114.714,rs10185087,-2.978  
2,114.739,rs6756248,-2.962  
2,114.772,rs6735012,-2.962  
2,114.873,rs1115910,-2.899  
2,115.268,rs4850931,-2.895  
2,115.284,rs4850932,-2.895  
2,115.312,rs6542950,-2.895  
2,115.335,rs6716842,-2.889  
2,115.385,rs6709376,-2.876  
2,115.479,rs13005184,-2.851  
2,115.523,rs1879121,-3.045  
2,115.635,rs11123842,-3.028  
2,115.642,rs1567804,-2.933  
2,115.678,rs7582332,-2.900  
2,115.785,rs7598826,-2.871  
2,115.834,rs7585886,-2.886  
2,115.854,rs356643,-2.878  
2,115.870,rs13025524,-2.896  
2,115.995,rs6543007,-3.234  
2,116.035,rs2309938,-3.235  
2,116.389,rs2310175,-3.186  
2,116.413,rs6755229,-3.187  
2,116.417,rs10203724,-3.185  
2,116.478,rs12712127,-3.159  
2,116.500,rs4851541,-3.153  
2,116.567,rs3917292,-3.119  
2,116.588,rs3917329,-3.113  
2,116.676,rs2302612,-3.082  
2,116.715,rs12475055,-3.052  
2,116.781,rs12999517,-2.989  
2,116.787,rs1921622,-2.990  
2,116.870,rs11465730,-3.077  
2,117.027,rs10184340,-3.152  
2,117.044,rs7561632,-3.161  
2,117.094,rs1052431,-3.140  
2,117.150,rs2732846,-3.168  
2,117.249,rs1024787,-3.206  
2,117.317,rs4569500,-3.226  
2,117.346,rs6735868,-3.162  
2,117.352,rs956966,-3.150  
2,117.363,rs6543194,-3.146  
2,117.521,rs6709515,-3.205

2,117.543,rs4319952,-3.202  
2,117.567,rs1430071,-3.188  
2,117.640,rs10198191,-3.148  
2,117.723,rs10191917,-3.099  
2,117.890,rs6761396,-3.055  
2,118.199,rs10177144,-2.933  
2,118.294,rs13391945,-2.910  
2,118.314,rs6713996,-2.986  
2,118.478,rs1033302,-2.875  
2,118.499,rs12620665,-2.974  
2,118.524,rs11123995,-2.998  
2,118.573,rs11123997,-3.033  
2,118.575,rs7598356,-3.034  
2,118.583,rs12479172,-3.033  
2,118.639,rs7567189,-2.864  
2,118.672,rs11893876,-2.878  
2,118.691,rs6727249,-2.886  
2,118.742,rs4851712,-2.906  
2,118.852,rs11124005,-2.914  
2,119.028,rs10205766,-2.869  
2,119.100,rs6543282,-2.840  
2,119.120,rs10187600,-2.851  
2,119.138,rs6729109,-2.861  
2,119.178,rs13028605,-2.873  
2,119.182,rs6761331,-2.874  
2,119.193,rs6736495,-2.882  
2,119.201,rs2576791,-2.903  
2,119.225,rs7584136,-2.733  
2,119.269,rs12471644,-2.683  
2,119.373,rs2278501,-2.476  
2,119.384,rs6738207,-2.489  
2,119.419,rs4374396,-2.601  
2,119.424,rs6543293,-2.616  
2,119.430,rs1914748,-2.633  
2,119.448,rs7583367,-2.459  
2,119.460,rs884876,-2.403  
2,119.488,rs17652317,-2.244  
2,119.500,rs13006682,-2.201  
2,119.536,rs1568261,-2.120  
2,119.591,rs2084779,-2.133  
2,119.594,rs1518611,-2.203  
2,119.642,rs6743358,-2.080  
2,119.644,rs4851073,-2.076  
2,119.692,rs4851831,-1.885  
2,119.700,rs13025485,-1.874  
2,119.722,rs336506,-1.928  
2,119.775,rs1114882,-1.899  
2,119.905,rs6740343,-1.791  
2,119.941,rs2098836,-1.735  
2,119.950,rs17721404,-1.729  
2,119.972,rs2567195,-1.718  
2,120.035,rs10182846,-1.786  
2,120.046,rs2377443,-1.772  
2,120.067,rs7595084,-1.749  
2,120.214,rs4851946,-1.888  
2,120.266,rs4449127,-1.884  
2,120.298,rs4308118,-1.876  
2,120.334,rs4234103,-1.807  
2,120.533,rs2125904,-1.828  
2,120.638,rs17033164,-1.962  
2,120.712,rs1006413,-2.047

2,120.732,rs1470590,-1.981  
2,120.775,rs17033380,-2.000  
2,120.786,rs11681787,-2.005  
2,120.828,rs7557745,-2.017  
2,120.852,rs13033073,-2.011  
2,120.931,rs12464185,-2.050  
2,120.959,rs2030675,-2.061  
2,120.990,rs6419584,-2.019  
2,120.991,rs2907907,-2.017  
2,121.051,rs1558398,-2.041  
2,121.427,rs6746088,-1.935  
2,121.457,rs10427352,-1.934  
2,121.549,rs266168,-1.931  
2,121.796,rs6744070,-1.942  
2,122.162,rs831983,-1.939  
2,122.174,rs6542736,-1.925  
2,122.238,rs3806536,-1.849  
2,122.247,rs6753886,-1.825  
2,122.251,rs12469531,-1.820  
2,122.253,rs12712007,-1.818  
2,122.278,rs1385956,-1.789  
2,122.345,rs17036061,-1.767  
2,122.349,rs3731680,-1.779  
2,122.394,rs10169264,-1.886  
2,122.438,rs7568838,-1.861  
2,122.559,rs260642,-1.780  
2,122.575,rs13427084,-1.756  
2,122.576,rs11691107,-1.757  
2,122.581,rs17269487,-1.758  
2,122.593,rs4676049,-1.759  
2,122.607,rs1471074,-1.677  
2,122.683,rs2163261,-1.651  
2,122.719,rs7605559,-1.597  
2,122.726,rs6714032,-1.588  
2,122.735,rs7568694,-1.578  
2,122.806,rs10171167,-1.435  
2,122.811,rs10221803,-1.431  
2,122.856,rs7580778,-1.317  
2,122.867,rs1010840,-1.301  
2,122.869,rs7601026,-1.303  
2,122.876,rs17197569,-1.307  
2,123.038,rs6747701,-1.305  
2,123.047,rs17463266,-1.303  
2,123.621,rs11887934,-1.185  
2,123.847,rs4849121,-1.120  
2,123.872,rs1533299,-1.115  
2,123.960,rs4849255,-1.184  
2,123.992,rs6732992,-1.189  
2,124.003,rs3789106,-1.189  
2,124.037,rs10496436,-1.189  
2,124.111,rs12986962,-1.127  
2,124.113,rs13000374,-1.127  
2,124.186,rs2289321,-1.146  
2,124.189,rs1439287,-1.149  
2,124.321,rs6542368,-1.188  
2,124.346,rs13395957,-1.187  
2,124.617,rs1448187,-1.119  
2,124.642,rs17775614,-1.154  
2,124.687,rs11123551,-1.170  
2,124.805,rs10171109,-1.326  
2,124.806,rs13011755,-1.328

2,124.839,rs7596295,-1.367  
2,124.867,rs3898028,-1.369  
2,124.872,rs7605443,-1.370  
2,124.940,rs1400323,-1.426  
2,125.004,rs10205067,-1.445  
2,125.070,rs954521,-1.463  
2,125.098,rs6707397,-1.470  
2,125.371,rs4849067,-1.402  
2,125.388,rs6747985,-1.412  
2,125.392,rs3961919,-1.414  
2,125.400,rs3789724,-1.407  
2,125.420,rs2305150,-1.322  
2,125.457,rs2515406,-1.358  
2,125.463,rs17042786,-1.370  
2,125.469,rs6761276,-1.381  
2,125.480,rs17042833,-1.380  
2,125.488,rs1542176,-1.378  
2,125.561,rs6739883,-1.329  
2,125.573,rs4849159,-1.217  
2,125.652,rs1110839,-1.268  
2,125.660,rs3768768,-1.265  
2,125.726,rs10864913,-1.241  
2,125.754,rs1191694,-1.233  
2,125.766,rs1191684,-1.236  
2,125.965,rs761647,-1.189  
2,126.004,rs3982819,-1.155  
2,126.024,rs2921879,-1.137  
2,126.148,rs4849265,-1.092  
2,126.178,rs17632109,-1.082  
2,126.247,rs2687625,-1.053  
2,126.338,rs17197611,-1.016  
2,126.353,rs9308688,-1.009  
2,126.421,rs10496455,-0.988  
2,126.484,rs275421,-0.991  
2,126.572,rs3132069,-0.991  
2,126.978,rs3132055,-0.922  
2,127.027,rs6715662,-0.931  
2,127.058,rs10208402,-0.936  
2,127.064,rs4849337,-0.881  
2,127.096,rs1430108,-0.833  
2,127.100,rs7590021,-0.807  
2,127.117,rs6729737,-0.759  
2,127.135,rs6542217,-0.770  
2,127.144,rs10496470,-0.765  
2,127.146,rs13022574,-0.764  
2,127.150,rs1561070,-0.762  
2,127.173,rs7605779,-0.705  
2,127.180,rs7606549,-0.702  
2,127.216,rs2420449,-0.675  
2,127.229,rs6755195,-0.673  
2,127.279,rs2175176,-0.677  
2,127.322,rs17452616,-0.702  
2,127.327,rs10864934,-0.706  
2,127.356,rs13416481,-0.698  
2,127.489,rs2421100,-0.694  
2,127.523,rs843399,-0.702  
2,127.826,rs11890985,-0.916  
2,127.976,rs17045601,-0.973  
2,128.006,rs4849449,-0.985  
2,128.093,rs6742579,-0.968  
2,128.209,rs2584980,-0.917

2,128.394,rs10167828,-0.816  
2,128.649,rs4848430,-0.810  
2,128.653,rs11901513,-0.804  
2,128.674,rs332895,-0.771  
2,128.697,rs2035171,-0.767  
2,128.797,rs6741941,-0.782  
2,128.818,rs290876,-0.773  
2,128.838,rs17047088,-0.766  
2,128.859,rs10439399,-0.762  
2,128.864,rs1516006,-0.761  
2,128.900,rs10210418,-0.764  
2,128.901,rs10211133,-0.774  
2,128.905,rs367201,-0.815  
2,128.930,rs10490632,-0.839  
2,129.007,rs1385925,-0.911  
2,129.016,rs2161830,-0.920  
2,129.033,rs4848493,-0.942  
2,129.038,rs12616545,-0.948  
2,129.051,rs4848497,-0.958  
2,129.130,rs6739488,-1.010  
2,129.139,rs1437690,-1.014  
2,129.140,rs1965130,-1.015  
2,129.150,rs1344896,-1.015  
2,129.223,rs332092,-1.017  
2,129.226,rs17005473,-1.018  
2,129.246,rs10221632,-1.024  
2,129.256,rs11687120,-1.033  
2,129.259,rs4848526,-1.033  
2,129.274,rs7602200,-1.042  
2,129.295,rs3806496,-1.064  
2,129.303,rs17009716,-1.075  
2,129.317,rs4848532,-1.092  
2,129.318,rs17010486,-1.045  
2,129.319,rs6712180,-0.996  
2,129.322,rs729735,-0.884  
2,129.340,rs893769,-0.831  
2,129.348,rs330763,-0.779  
2,129.356,rs10496557,-0.741  
2,129.360,rs5018771,-0.737  
2,129.362,rs4849760,-0.737  
2,129.366,rs1867750,-0.737  
2,129.369,rs11680207,-0.758  
2,129.374,rs7584975,-0.792  
2,129.395,rs734846,-0.809  
2,129.397,rs838073,-0.810  
2,129.401,rs1545360,-0.805  
2,129.404,rs2166504,-0.801  
2,129.408,rs13391616,-0.797  
2,129.426,rs6542524,-0.784  
2,129.435,rs6727485,-0.805  
2,129.471,rs6757604,-0.888  
2,129.480,rs2579612,-0.796  
2,129.482,rs4383344,-0.790  
2,129.496,rs2587695,-0.803  
2,129.526,rs6761357,-0.833  
2,129.533,rs1568538,-0.835  
2,129.592,rs949530,-0.850  
2,129.609,rs3111727,-0.847  
2,130.342,rs4848580,-0.701  
2,130.645,rs10496561,-0.581  
2,130.902,rs7589138,-0.477

2,131.075,rs13410055,-0.454  
2,131.290,rs12623934,-0.447  
2,131.425,rs6731937,-0.441  
2,131.454,rs13408457,-0.400  
2,131.539,rs10186456,-0.413  
2,131.603,rs4504000,-0.435  
2,131.685,rs6542599,-0.360  
2,131.929,rs2140779,-0.297  
2,131.930,rs17389324,-0.297  
2,131.932,rs17050267,-0.296  
2,132.055,rs896499,-0.254  
2,132.072,rs1568836,-0.234  
2,132.076,rs4849909,-0.255  
2,132.268,rs1349561,-0.271  
2,132.733,rs2053989,-0.264  
2,132.758,rs735557,-0.267  
2,132.806,rs895491,-0.310  
2,132.841,rs7559777,-0.285  
2,132.877,rs2166898,-0.291  
2,132.933,rs277547,-0.320  
2,132.959,rs277534,-0.306  
2,132.997,rs1187936,-0.264  
2,133.000,rs1992902,-0.261  
2,133.193,rs735370,-0.153  
2,133.309,rs280224,-0.134  
2,133.353,rs12711539,-0.129  
2,133.433,rs10184095,-0.119  
2,133.505,rs4271771,-0.111  
2,133.539,rs4488664,-0.112  
2,133.570,rs4848692,-0.137  
2,133.587,rs4622731,-0.138  
2,133.618,rs6753743,-0.127  
2,133.681,rs2250092,-0.125  
2,133.774,rs2953083,-0.091  
2,133.945,rs12479320,-0.072  
2,134.711,rs6734147,-0.051  
2,134.824,rs11889169,-0.045  
2,134.984,rs1432312,-0.027  
2,135.046,rs1320869,-0.011  
2,135.049,rs6756499,-0.010  
2,135.060,rs1881881,-0.009  
2,135.065,rs17007730,-0.008  
2,135.066,rs17007740,-0.008  
2,135.072,rs12471629,-0.006  
2,135.078,rs896902,-0.003  
2,135.129,rs6725236,0.001  
2,135.130,rs7582698,0.001  
2,135.152,rs4241113,0.003  
2,135.227,rs1527978,0.007  
2,135.242,rs1395930,0.007  
2,135.248,rs10207388,0.008  
2,135.260,rs299575,0.010  
2,135.270,rs2661038,0.010  
2,135.443,rs955303,0.011  
2,135.468,rs2030833,0.011  
2,135.764,rs13385327,0.009  
2,135.839,rs2901018,0.008  
2,136.051,rs1159139,0.005  
2,136.324,rs925796,0.006  
2,136.432,rs13415885,0.011  
2,136.452,rs6742628,0.011

2,136.620,rs7577916,0.012  
2,136.703,rs17319464,0.012  
2,136.775,rs11123030,0.013  
2,136.807,rs779992,0.016  
2,137.000,rs11123037,0.029  
2,137.084,rs1543901,0.037  
2,137.232,rs13015323,0.045  
2,137.244,rs12470517,0.035  
2,137.278,rs6541961,0.037  
2,137.430,rs11684957,0.044  
2,137.473,rs7580383,0.043  
2,137.573,rs2168024,0.047  
2,137.620,rs314712,0.051  
2,137.653,rs1435578,0.086  
2,137.973,rs7571928,0.080  
2,138.042,rs6715359,0.079  
2,138.391,rs6720122,0.082  
2,138.399,rs6726563,0.082  
2,138.620,rs12994681,0.088  
2,139.355,rs437866,0.100  
2,139.604,rs11883942,0.115  
2,139.678,rs7596310,0.106  
2,139.683,rs6707983,0.105  
2,139.744,rs9287557,0.099  
2,139.752,rs6714079,0.101  
2,139.817,rs4662685,0.123  
2,139.849,rs13425954,0.121  
2,139.876,rs17014263,0.129  
2,139.887,rs10187088,0.139  
2,139.943,rs10210965,0.140  
2,139.975,rs6732888,0.139  
2,140.057,rs4405698,0.136  
2,140.191,rs10928992,0.128  
2,140.355,rs556902,0.136  
2,140.381,rs754737,0.135  
2,140.421,rs6713701,0.159  
2,140.447,rs17014788,0.161  
2,140.743,rs7590705,0.172  
2,140.809,rs7570609,0.179  
2,140.858,rs4611601,0.182  
2,140.910,rs13417920,0.208  
2,140.929,rs2243934,0.208  
2,141.051,rs6736731,0.217  
2,141.150,rs2261682,0.224  
2,141.239,rs2438039,0.224  
2,141.249,rs11682273,0.224  
2,141.375,rs12617108,0.171  
2,141.479,rs17178720,0.139  
2,141.569,rs734193,0.114  
2,141.573,rs6717511,0.113  
2,141.577,rs17016070,0.113  
2,141.604,rs714129,0.113  
2,141.634,rs11890277,0.121  
2,141.649,rs10496668,0.125  
2,141.671,rs882275,0.129  
2,141.718,rs9783995,0.148  
2,141.726,rs4662808,0.148  
2,141.775,rs4662827,0.145  
2,141.784,rs935846,0.143  
2,141.834,rs841080,0.136  
2,141.851,rs7564226,0.132

2,141.970,rs6738894,0.180  
2,141.981,rs13010732,0.180  
2,142.045,rs6744496,0.163  
2,142.049,rs10496671,0.161  
2,142.125,rs12478682,0.149  
2,142.336,rs4662878,0.143  
2,142.406,rs908848,0.144  
2,142.475,rs13024819,0.161  
2,142.619,rs7567687,0.143  
2,142.985,rs1012734,0.146  
2,143.075,rs4662980,0.157  
2,143.083,rs10189546,0.157  
2,143.147,rs4622658,0.200  
2,143.164,rs2952605,0.172  
2,143.207,rs2707652,0.150  
2,143.274,rs4233600,0.128  
2,143.291,rs2407074,0.150  
2,143.666,rs11674689,0.151  
2,143.792,rs3739122,0.145  
2,143.796,rs12151738,0.145  
2,144.173,rs272128,0.107  
2,144.231,rs272118,0.083  
2,144.256,rs1430706,0.065  
2,144.286,rs1542604,0.054  
2,144.305,rs4850303,0.055  
2,144.436,rs4850101,0.060  
2,144.477,rs2403238,0.064  
2,144.892,rs2313693,0.046  
2,144.972,rs6731616,0.042  
2,145.040,rs12472079,0.052  
2,145.345,rs10928155,0.039  
2,145.357,rs4088115,0.038  
2,145.503,rs4063769,0.040  
2,145.617,rs4577331,0.017  
2,145.663,rs4621214,0.012  
2,145.795,rs7582293,0.000  
2,145.820,rs4082157,0.002  
2,145.893,rs7422689,0.003  
2,145.906,rs2241763,0.002  
2,145.925,rs6430339,0.001  
2,145.976,rs2315593,0.004  
2,146.012,rs10173080,0.004  
2,146.040,rs3109156,0.005  
2,146.041,rs3109157,0.016  
2,146.053,rs11680742,0.014  
2,146.064,rs6760538,0.012  
2,146.094,rs964842,0.014  
2,146.113,rs2709549,0.013  
2,146.169,rs7595365,0.010  
2,146.173,rs1430626,0.010  
2,146.235,rs6729213,0.015  
2,146.246,rs11887257,0.017  
2,146.250,rs6712172,0.017  
2,146.270,rs6709364,0.021  
2,146.290,rs1374744,0.021  
2,146.321,rs2577634,0.025  
2,146.361,rs12619661,0.018  
2,146.366,rs6430384,0.020  
2,146.376,rs2320399,0.021  
2,146.394,rs1437897,0.017  
2,146.409,rs7572356,0.016



2,146.415,rs6730963,0.016  
2,146.467,rs6430390,0.017  
2,146.531,rs17793104,0.022  
2,146.543,rs6716343,0.022  
2,146.557,rs1344809,0.021  
2,146.622,rs1821421,0.021  
2,146.857,rs7577925,0.018  
2,147.015,rs1865582,0.020  
2,147.213,rs16825174,0.014  
2,147.245,rs13419826,0.015  
2,147.294,rs4953883,0.014  
2,147.421,rs2043233,0.008  
2,147.457,rs891821,0.007  
2,147.502,rs1432282,0.007  
2,147.508,rs12622133,0.007  
2,147.654,rs721270,0.019  
2,147.655,rs16827735,0.019  
2,147.661,rs1901435,0.020  
2,147.776,rs4522658,0.022  
2,147.905,rs4589813,0.030  
2,148.006,rs6430462,0.046  
2,148.014,rs1562345,0.047  
2,148.025,rs7579501,0.061  
2,148.057,rs4603824,0.057  
2,148.084,rs10928465,0.066  
2,148.130,rs6714405,0.058  
2,148.240,rs11897842,0.028  
2,148.322,rs10208875,0.012  
2,148.483,rs16830022,0.012  
2,148.621,rs11900787,0.012  
2,148.635,rs1257216,0.014  
2,148.649,rs3748896,0.012  
2,148.655,rs12987785,0.015  
2,148.665,rs1257193,0.021  
2,148.677,rs16830277,0.030  
2,148.681,rs935471,0.033  
2,148.722,rs2290047,0.046  
2,148.746,rs755503,0.055  
2,148.768,rs3791312,0.063  
2,148.778,rs535900,0.064  
2,148.783,rs539588,0.065  
2,148.852,rs6730778,0.078  
2,148.884,rs6705916,0.085  
2,148.971,rs6719604,0.084  
2,148.981,rs13389245,0.084  
2,148.994,rs10198552,0.086  
2,149.008,rs7564746,0.087  
2,149.073,rs16831235,0.078  
2,149.113,rs2874739,0.076  
2,149.535,rs11903319,0.103  
2,149.545,rs4988186,0.104  
2,149.601,rs4954555,0.106  
2,149.631,rs10191360,0.107  
2,149.671,rs16835386,0.114  
2,149.877,rs10182108,0.146  
2,149.923,rs2465095,0.154  
2,149.934,rs2114750,0.155  
2,150.103,rs524958,0.125  
2,150.207,rs11884290,0.104  
2,150.282,rs6750400,0.089  
2,150.283,rs979976,0.086

2,150.351,rs9784168,0.063  
2,150.380,rs6430676,0.070  
2,150.381,rs16838540,0.071  
2,150.388,rs6728076,0.083  
2,150.404,rs9287472,0.083  
2,150.607,rs4954379,0.073  
2,150.672,rs12613078,0.079  
2,150.679,rs5010976,0.079  
2,150.691,rs7591709,0.075  
2,150.714,rs1048821,0.039  
2,150.885,rs6730857,0.045  
2,150.932,rs6738271,0.049  
2,151.010,rs2071048,0.074  
2,151.096,rs10496795,0.088  
2,151.140,rs4273272,0.096  
2,151.164,rs12476851,0.099  
2,151.175,rs6756311,0.078  
2,151.273,rs13011280,0.084  
2,151.320,rs4643591,0.087  
2,151.452,rs7576870,0.105  
2,151.566,rs13405108,0.098  
2,151.722,rs4954943,0.079  
2,151.787,rs10206559,0.071  
2,151.805,rs10928663,0.069  
2,151.822,rs4322786,0.067  
2,151.892,rs9636230,0.055  
2,151.940,rs1351919,0.053  
2,151.960,rs12612135,0.050  
2,152.120,rs6430852,0.031  
2,152.206,rs2376763,0.021  
2,152.221,rs6724734,0.019  
2,152.283,rs6722928,0.015  
2,152.346,rs3856354,0.015  
2,152.405,rs1015739,0.013  
2,152.472,rs1405930,0.015  
2,152.485,rs4954669,0.016  
2,152.507,rs2950606,0.022  
2,152.522,rs16843445,0.015  
2,152.631,rs1486969,0.025  
2,152.808,rs1464212,0.045  
2,152.822,rs11897270,0.046  
2,152.939,rs2380881,0.062  
2,152.966,rs6430913,0.081  
2,153.018,rs1564933,0.086  
2,153.045,rs1441467,0.079  
2,153.056,rs544510,0.077  
2,153.102,rs6748249,0.060  
2,153.107,rs10170867,0.058  
2,153.109,rs6709738,0.057  
2,153.147,rs10496859,0.067  
2,153.234,rs2091302,0.068  
2,153.272,rs12996731,0.066  
2,153.285,rs1882638,0.083  
2,153.371,rs1521108,0.084  
2,153.413,rs983810,0.078  
2,153.420,rs2683824,0.077  
2,153.430,rs16845924,0.073  
2,153.486,rs4954702,0.048  
2,153.525,rs6753877,0.035  
2,153.534,rs4622654,0.032  
2,153.696,rs7568970,0.024

2,153.731,rs1437352,0.031  
2,153.755,rs16846822,0.021  
2,153.760,rs164979,0.019  
2,153.814,rs906648,0.017  
2,153.826,rs6758126,0.017  
2,153.831,rs1036505,0.017  
2,153.832,rs10496894,0.017  
2,153.845,rs16847064,0.018  
2,153.861,rs7558916,0.019  
2,153.922,rs11884813,0.024  
2,153.967,rs10496905,0.028  
2,153.978,rs1991997,0.029  
2,154.099,rs1191972,0.027  
2,154.101,rs16847914,0.027  
2,154.132,rs11677303,0.026  
2,154.216,rs2290140,0.026  
2,154.269,rs7590590,0.018  
2,154.516,rs4273167,0.021  
2,154.593,rs7558786,0.024  
2,154.924,rs4662299,0.024  
2,155.157,rs407867,0.030  
2,155.245,rs6750969,0.031  
2,155.272,rs6430004,0.024  
2,155.288,rs827228,0.031  
2,155.423,rs16858984,0.024  
2,155.438,rs10928169,0.023  
2,155.495,rs2381464,0.029  
2,155.505,rs11890035,0.029  
2,155.621,rs6735455,0.045  
2,155.664,rs6727288,0.050  
2,155.767,rs2969584,0.070  
2,155.772,rs10928190,0.070  
2,155.801,rs13409480,0.070  
2,155.828,rs1517912,0.071  
2,155.886,rs2292834,0.073  
2,155.912,rs11898334,0.074  
2,156.024,rs1257344,0.111  
2,156.130,rs10803501,0.109  
2,156.156,rs787143,0.123  
2,156.172,rs768145,0.133  
2,156.349,rs6719835,0.146  
2,156.487,rs1560224,0.145  
2,156.659,rs16823583,0.147  
2,156.846,rs10496963,0.146  
2,157.066,rs12105918,0.146  
2,157.077,rs7599224,0.146  
2,157.124,rs6755392,0.148  
2,157.190,rs1469346,0.138  
2,157.202,rs13010057,0.120  
2,157.220,rs4662448,0.122  
2,157.277,rs10490592,0.139  
2,157.327,rs2552546,0.142  
2,157.360,rs4488597,0.124  
2,157.398,rs10928295,0.105  
2,157.432,rs12988074,0.081  
2,157.457,rs10928303,0.077  
2,157.497,rs4233577,0.071  
2,157.822,rs1546602,0.029  
2,158.100,rs12476865,0.031  
2,158.269,rs16827260,0.039  
2,158.276,rs7567739,0.035

2,158.290,rs16827299,0.028  
2,158.350,rs10210722,0.029  
2,158.407,rs1895694,0.029  
2,158.954,rs7605678,0.057  
2,159.114,rs10199719,0.057  
2,159.125,rs13430177,0.057  
2,159.224,rs2121344,0.058  
2,159.323,rs769079,0.086  
2,159.648,rs12467520,0.130  
2,159.679,rs16829355,0.113  
2,160.053,rs7577450,0.133  
2,160.105,rs1471649,0.127  
2,160.133,rs2377510,0.123  
2,160.201,rs1404683,0.123  
2,160.310,rs6715376,0.142  
2,160.399,rs6706233,0.137  
2,160.487,rs1196696,0.113  
2,160.512,rs1196714,0.108  
2,160.540,rs1196687,0.106  
2,160.756,rs4667423,0.102  
2,160.774,rs10173317,0.101  
2,160.886,rs4667404,0.091  
2,160.935,rs9711252,0.089  
2,160.956,rs10171287,0.078  
2,160.987,rs16827625,0.073  
2,161.027,rs331124,0.069  
2,161.037,rs330650,0.068  
2,161.044,rs330647,0.065  
2,161.085,rs330609,0.069  
2,161.102,rs4667379,0.070  
2,161.131,rs4260269,0.079  
2,161.220,rs976396,0.060  
2,161.224,rs6710586,0.063  
2,161.226,rs12474944,0.066  
2,161.234,rs3108514,0.100  
2,161.253,rs2697339,0.117  
2,161.263,rs1528429,0.116  
2,161.277,rs7609510,0.107  
2,161.282,rs16828295,0.110  
2,161.327,rs2879878,0.140  
2,161.328,rs10930176,0.140  
2,161.399,rs2139425,0.129  
2,161.428,rs6734792,0.121  
2,161.471,rs6729783,0.085  
2,161.484,rs929388,0.074  
2,161.492,rs4664779,0.072  
2,161.500,rs12467192,0.070  
2,161.501,rs6433017,0.070  
2,161.504,rs1990149,0.069  
2,161.506,rs6723323,0.067  
2,161.511,rs1859724,0.065  
2,161.526,rs10200704,0.056  
2,161.605,rs6735085,0.055  
2,161.668,rs4664951,0.054  
2,161.708,rs289943,0.058  
2,161.807,rs6726634,0.067  
2,161.858,rs3845844,0.067  
2,161.874,rs10197940,0.067  
2,161.995,rs3732311,0.066  
2,162.043,rs4664493,0.081  
2,162.314,rs6727569,0.052

2,162.604,rs7600624,0.033  
2,162.668,rs6434081,0.031  
2,162.680,rs2577185,0.031  
2,162.694,rs10497105,0.031  
2,162.804,rs1962313,0.051  
2,162.816,rs17400806,0.039  
2,162.817,rs10497114,0.039  
2,163.029,rs10931434,0.038  
2,163.059,rs1946677,0.036  
2,163.104,rs7582602,0.028  
2,163.109,rs1369256,0.027  
2,163.113,rs1369260,0.027  
2,163.115,rs7606384,0.027  
2,163.135,rs13414678,0.022  
2,163.207,rs1439630,0.015  
2,163.235,rs1579684,0.023  
2,163.311,rs1955152,0.008  
2,163.953,rs7592907,0.005  
2,164.186,rs7571016,0.007  
2,164.250,rs11694977,0.013  
2,164.367,rs993412,0.026  
2,164.448,rs1527862,0.028  
2,164.456,rs799822,0.028  
2,164.568,rs249703,0.020  
2,164.650,rs774500,0.030  
2,164.983,rs11690166,0.030  
2,165.054,rs16838062,0.030  
2,165.093,rs2591164,0.029  
2,165.172,rs2652442,0.027  
2,165.173,rs16838189,0.027  
2,165.178,rs1838675,0.027  
2,165.190,rs6744254,0.027  
2,165.558,rs2691775,0.029  
2,165.559,rs10180851,0.029  
2,165.684,rs1980211,0.045  
2,165.764,rs1518284,0.048  
2,165.784,rs884799,0.048  
2,165.797,rs12471133,0.048  
2,165.828,rs1402071,0.049  
2,165.873,rs769353,0.053  
2,165.917,rs1949991,0.057  
2,165.967,rs12694513,0.062  
2,165.968,rs16839972,0.062  
2,166.003,rs10196668,0.075  
2,166.014,rs13011491,0.080  
2,166.132,rs16840135,0.078  
2,166.264,rs6721605,0.073  
2,166.364,rs16840461,0.071  
2,166.459,rs7575920,0.066  
2,166.497,rs1543932,0.062  
2,166.795,rs7355634,0.071  
2,166.925,rs263305,0.075  
2,167.013,rs1867846,0.089  
2,167.083,rs198688,0.086  
2,167.119,rs267993,0.083  
2,167.198,rs4299296,0.059  
2,167.226,rs4556933,0.039  
2,167.245,rs1902032,0.039  
2,167.276,rs2444770,0.040  
2,167.334,rs6756623,0.043  
2,167.434,rs10933443,0.046

2,167.447,rs10497193,0.044  
2,167.563,rs720159,0.025  
2,167.597,rs4664236,0.023  
2,167.604,rs13023991,0.024  
2,167.654,rs6739665,0.040  
2,167.660,rs6707705,0.040  
2,167.666,rs17603277,0.039  
2,167.715,rs1357182,0.033  
2,167.718,rs956986,0.033  
2,167.737,rs4233674,0.024  
2,167.748,rs4664935,0.025  
2,167.767,rs13413279,0.026  
2,167.895,rs10190089,0.020  
2,167.999,rs7576462,0.003  
2,168.002,rs4665072,0.013  
2,168.092,rs11693108,0.014  
2,168.130,rs12466258,0.016  
2,168.196,rs2729722,0.019  
2,168.235,rs7601374,0.022  
2,168.243,rs16844494,0.022  
2,168.272,rs3792164,0.024  
2,168.315,rs7598162,0.027  
2,168.668,rs7423892,0.039  
2,168.686,rs4664334,0.041  
2,168.691,rs10192369,0.041  
2,168.703,rs7598938,0.042  
2,168.824,rs270996,0.053  
2,168.863,rs1615929,0.057  
2,168.876,rs1829975,0.044  
2,169.016,rs7309,0.027  
2,169.069,rs3769963,0.019  
2,169.110,rs768835,0.015  
2,169.139,rs17243975,0.013  
2,169.243,rs2892769,0.007  
2,169.369,rs2909448,0.008  
2,169.413,rs2080712,0.002  
2,169.429,rs1990761,0.002  
2,169.435,rs3761656,0.002  
2,169.487,rs1990760,0.003  
2,169.525,rs17783344,0.003  
2,170.063,rs11682423,0.000  
2,170.270,rs1434999,-0.000  
2,170.271,rs1273201,-0.000  
2,170.285,rs1834220,-0.002  
2,170.297,rs1387588,-0.004  
2,170.303,rs6712770,-0.004  
2,170.309,rs1221518,-0.005  
2,170.314,rs13402758,-0.006  
2,170.321,rs10193051,-0.006  
2,170.322,rs6761831,-0.006  
2,170.326,rs12692697,-0.019  
2,170.327,rs1561606,-0.021  
2,170.328,rs2028406,-0.015  
2,170.329,rs13003002,-0.014  
2,170.334,rs10930109,-0.015  
2,170.335,rs728700,-0.015  
2,170.337,rs1031736,-0.014  
2,170.340,rs17810175,-0.011  
2,170.360,rs171985,-0.000  
2,170.369,rs1439210,0.000  
2,170.371,rs9287843,0.000

2,170.376,rs13033944,0.000  
2,170.382,rs10192863,0.002  
2,170.394,rs7568923,-0.000  
2,170.395,rs4130269,-0.000  
2,170.643,rs3769885,-0.003  
2,171.006,rs1355995,-0.006  
2,171.095,rs1020626,-0.007  
2,171.125,rs1007732,-0.008  
2,171.128,rs2034710,-0.008  
2,171.142,rs12467436,-0.007  
2,171.145,rs6720974,-0.007  
2,171.248,rs2288704,-0.007  
2,171.342,rs6735544,-0.005  
2,171.396,rs12473643,-0.004  
2,171.440,rs13402180,-0.005  
2,171.476,rs16852031,-0.005  
2,171.485,rs6738209,-0.005  
2,171.532,rs13411795,-0.007  
2,171.536,rs2049711,-0.007  
2,171.591,rs10183984,-0.015  
2,171.602,rs1447237,-0.017  
2,171.931,rs1473041,-0.012  
2,172.279,rs1479588,-0.016  
2,172.439,rs1159502,-0.016  
2,172.617,rs1897339,-0.019  
2,172.649,rs988843,-0.022  
2,172.655,rs986697,-0.023  
2,172.745,rs1226906,-0.043  
2,172.767,rs2390601,-0.066  
2,172.810,rs7605048,-0.077  
2,172.894,rs7585307,-0.092  
2,172.915,rs6433011,-0.095  
2,173.054,rs6734498,-0.095  
2,173.081,rs836709,-0.094  
2,173.236,rs6734516,-0.119  
2,173.291,rs7574351,-0.120  
2,173.387,rs6750247,-0.122  
2,173.408,rs4667556,-0.128  
2,173.492,rs1850440,-0.145  
2,173.505,rs3769382,-0.144  
2,173.613,rs950535,-0.127  
2,173.715,rs9646776,-0.091  
2,173.727,rs4629128,-0.087  
2,173.731,rs6714431,-0.088  
2,173.773,rs7597374,-0.082  
2,173.893,rs1377502,-0.064  
2,173.994,rs964987,-0.055  
2,174.031,rs1020603,-0.056  
2,174.244,rs10514622,-0.051  
2,174.246,rs2042549,-0.051  
2,174.256,rs918957,-0.050  
2,174.270,rs2161977,-0.049  
2,174.345,rs4668102,-0.052  
2,174.425,rs16855893,-0.059  
2,174.538,rs3821116,-0.061  
2,174.609,rs478333,-0.062  
2,174.669,rs3770582,-0.059  
2,174.674,rs17267869,-0.058  
2,174.695,rs3770590,-0.048  
2,174.777,rs10490134,-0.051  
2,174.865,rs10515932,-0.054

2,174.962,rs2268375,-0.040  
2,175.060,rs2302694,-0.039  
2,175.095,rs830956,-0.025  
2,175.126,rs830998,-0.036  
2,175.129,rs7568568,-0.036  
2,175.143,rs2161039,-0.053  
2,175.156,rs2673163,-0.059  
2,175.165,rs853988,-0.063  
2,175.187,rs861239,-0.061  
2,175.240,rs2389557,-0.064  
2,175.276,rs4667601,-0.062  
2,175.327,rs4616447,-0.059  
2,175.328,rs7591026,-0.043  
2,175.500,rs16857020,-0.042  
2,175.796,rs2288331,-0.038  
2,175.840,rs7590347,-0.038  
2,175.884,rs4668168,-0.038  
2,176.020,rs10803844,-0.040  
2,176.320,rs6725973,-0.043  
2,176.347,rs6731008,-0.043  
2,176.388,rs12474899,-0.047  
2,176.391,rs4667620,-0.047  
2,176.436,rs4667623,-0.053  
2,176.469,rs16857905,-0.052  
2,176.484,rs2355343,-0.052  
2,176.547,rs6748642,-0.045  
2,176.633,rs2355351,-0.046  
2,176.699,rs1364529,-0.055  
2,176.878,rs12611789,-0.072  
2,177.283,rs16858186,-0.098  
2,177.294,rs1356589,-0.099  
2,177.347,rs17426142,-0.113  
2,177.351,rs17426191,-0.113  
2,177.392,rs12692953,-0.114  
2,177.405,rs17580389,-0.116  
2,177.415,rs17271301,-0.117  
2,177.454,rs2355826,-0.103  
2,177.461,rs2883782,-0.103  
2,177.476,rs6734646,-0.109  
2,177.489,rs6724616,-0.126  
2,177.494,rs10191600,-0.136  
2,177.502,rs724529,-0.152  
2,177.531,rs7425766,-0.122  
2,177.545,rs2080401,-0.117  
2,177.558,rs2270336,-0.118  
2,177.644,rs6755814,-0.129  
2,177.685,rs4297845,-0.136  
2,177.931,rs7582822,-0.130  
2,178.046,rs13402901,-0.120  
2,178.068,rs3795996,-0.115  
2,178.163,rs11684782,-0.095  
2,178.197,rs6729179,-0.089  
2,178.231,rs4668394,-0.087  
2,178.310,rs1399956,-0.070  
2,178.334,rs979956,-0.065  
2,178.472,rs1607254,-0.059  
2,178.553,rs12692976,-0.060  
2,178.914,rs788158,-0.083  
2,178.929,rs788172,-0.083  
2,179.010,rs1386354,-0.082  
2,179.013,rs1486957,-0.082



2,179.033,rs3901602,-0.079  
2,179.096,rs11893372,-0.077  
2,179.141,rs10930538,-0.075  
2,179.167,rs7574002,-0.068  
2,179.212,rs12471128,-0.062  
2,179.329,rs4283388,-0.075  
2,179.367,rs10930554,-0.074  
2,179.400,rs2141698,-0.071  
2,179.407,rs3108779,-0.087  
2,179.442,rs6755175,-0.080  
2,179.549,rs13012170,-0.060  
2,179.575,rs12151618,-0.057  
2,179.723,rs836610,-0.032  
2,179.736,rs13024014,-0.031  
2,179.812,rs836593,-0.025  
2,179.865,rs2081406,-0.016  
2,179.893,rs17754945,-0.013  
2,179.977,rs7581330,-0.009  
2,180.084,rs2553011,-0.008  
2,180.091,rs2113807,-0.008  
2,180.135,rs11695769,-0.006  
2,180.163,rs3769245,-0.012  
2,180.172,rs1867942,-0.015  
2,180.246,rs2305462,-0.016  
2,180.255,rs6751505,-0.017  
2,180.273,rs3769210,-0.017  
2,180.411,rs3769185,-0.025  
2,180.564,rs820007,-0.033  
2,180.573,rs10497398,-0.034  
2,180.580,rs13031154,-0.034  
2,180.590,rs1442973,-0.033  
2,180.595,rs820042,-0.033  
2,180.609,rs868294,-0.032  
2,180.712,rs11078,-0.023  
2,180.755,rs11689493,-0.013  
2,180.766,rs1865236,-0.011  
2,180.772,rs6433406,-0.018  
2,180.789,rs7567442,-0.018  
2,180.822,rs1865651,-0.015  
2,180.863,rs12473093,-0.006  
2,180.865,rs1433681,-0.006  
2,181.002,rs546613,-0.004  
2,181.053,rs730912,-0.010  
2,181.061,rs2358235,-0.011  
2,181.065,rs544938,-0.011  
2,181.109,rs821147,-0.007  
2,181.166,rs752280,-0.013  
2,181.232,rs6433435,-0.009  
2,181.256,rs16823294,-0.008  
2,181.361,rs7421996,-0.005  
2,181.396,rs7591669,-0.007  
2,181.438,rs4972613,-0.021  
2,181.468,rs4972618,-0.025  
2,181.573,rs6721460,-0.023  
2,181.592,rs935398,-0.022  
2,181.665,rs6433461,-0.017  
2,181.677,rs6756828,-0.017  
2,181.968,rs4350713,-0.019  
2,182.019,rs17320820,-0.015  
2,182.038,rs17255455,-0.016  
2,182.059,rs1450043,-0.013

2,182.064,rs10221679,-0.013  
2,182.090,rs1430182,-0.010  
2,182.091,rs7558523,-0.010  
2,182.115,rs6738929,-0.016  
2,182.119,rs10497426,-0.009  
2,182.124,rs7575145,-0.003  
2,182.153,rs10497431,-0.005  
2,182.158,rs1378729,-0.005  
2,182.455,rs1982235,-0.018  
2,183.122,rs7565836,-0.021  
2,183.132,rs7592980,-0.022  
2,183.230,rs13017316,-0.028  
2,183.271,rs10497444,-0.031  
2,183.303,rs6754856,-0.033  
2,183.358,rs1012357,-0.048  
2,183.365,rs1374369,-0.049  
2,183.388,rs12693085,-0.046  
2,183.403,rs6433564,-0.049  
2,183.412,rs6709287,-0.049  
2,183.636,rs847175,-0.054  
2,183.676,rs12474905,-0.050  
2,183.691,rs847153,-0.048  
2,183.740,rs2113563,-0.042  
2,183.753,rs6736786,-0.042  
2,183.851,rs2140538,-0.037  
2,183.871,rs3850167,-0.037  
2,184.026,rs818361,-0.027  
2,184.093,rs7604433,-0.030  
2,184.188,rs1554406,-0.059  
2,184.215,rs6433594,-0.072  
2,184.235,rs2122013,-0.048  
2,184.265,rs13387510,-0.046  
2,184.284,rs1037222,-0.048  
2,184.302,rs6721218,-0.049  
2,184.390,rs2922309,-0.057  
2,184.443,rs6433602,-0.067  
2,184.508,rs4407280,-0.093  
2,184.516,rs7422957,-0.092  
2,184.589,rs6705679,-0.080  
2,184.665,rs13032587,-0.071  
2,184.705,rs6723196,-0.065  
2,184.780,rs6433620,-0.064  
2,184.829,rs1370539,-0.063  
2,184.840,rs11691671,-0.063  
2,184.936,rs9287995,-0.063  
2,184.970,rs1529093,-0.058  
2,185.006,rs10497466,-0.042  
2,185.232,rs6726395,-0.039  
2,185.246,rs1962142,-0.039  
2,185.300,rs13002088,-0.063  
2,185.301,rs2303537,-0.063  
2,185.441,rs2291302,-0.083  
2,185.467,rs2366913,-0.087  
2,185.533,rs10497528,-0.090  
2,185.571,rs7581299,-0.110  
2,185.650,rs12693178,-0.119  
2,185.692,rs10179379,-0.102  
2,185.705,rs7558234,-0.123  
2,185.709,rs6735828,-0.140  
2,185.712,rs10497537,-0.133  
2,185.722,rs6726305,-0.112

2,185.724,rs10930865,-0.100  
2,185.727,rs7608378,-0.077  
2,185.728,rs4894095,-0.071  
2,185.731,rs6433781,-0.071  
2,185.736,rs12328936,-0.072  
2,185.740,rs7586173,-0.077  
2,185.756,rs6713554,-0.095  
2,185.776,rs10930874,-0.119  
2,185.780,rs6757845,-0.121  
2,185.792,rs1028179,-0.124  
2,185.801,rs17747577,-0.126  
2,185.813,rs10210118,-0.130  
2,185.822,rs6715297,-0.142  
2,185.836,rs6433796,-0.163  
2,185.876,rs3112943,-0.176  
2,185.896,rs17822210,-0.183  
2,185.899,rs7590028,-0.184  
2,185.941,rs1486239,-0.208  
2,185.958,rs357708,-0.249  
2,185.966,rs11680455,-0.255  
2,185.982,rs12328338,-0.252  
2,185.998,rs259839,-0.279  
2,186.018,rs260059,-0.278  
2,186.100,rs4125973,-0.304  
2,186.125,rs10497560,-0.312  
2,186.171,rs10497563,-0.323  
2,186.181,rs16867270,-0.320  
2,186.241,rs7589013,-0.330  
2,186.268,rs1823790,-0.334  
2,186.287,rs7606036,-0.297  
2,186.366,rs1477499,-0.267  
2,186.387,rs918959,-0.253  
2,186.402,rs3845691,-0.246  
2,186.452,rs10930936,-0.267  
2,186.455,rs10497572,-0.268  
2,186.506,rs12619437,-0.286  
2,186.526,rs10209813,-0.279  
2,186.531,rs4331462,-0.279  
2,186.810,rs7599846,-0.249  
2,186.886,rs10497576,-0.241  
2,186.940,rs10206405,-0.237  
2,187.061,rs7602460,-0.232  
2,187.063,rs831864,-0.234  
2,187.119,rs6740847,-0.282  
2,187.261,rs10490689,-0.365  
2,187.379,rs4018755,-0.396  
2,187.429,rs2950648,-0.388  
2,187.466,rs1441159,-0.387  
2,187.676,rs1157595,-0.360  
2,187.701,rs11695458,-0.349  
2,187.775,rs7594388,-0.317  
2,187.832,rs4404233,-0.316  
2,187.927,rs1432515,-0.328  
2,188.021,rs2118484,-0.300  
2,188.096,rs2195611,-0.343  
2,188.101,rs10931010,-0.343  
2,188.197,rs2082136,-0.351  
2,188.366,rs17356755,-0.336  
2,188.435,rs10931040,-0.337  
2,188.459,rs7593100,-0.310  
2,188.465,rs288324,-0.304

2,188.541,rs9333280,-0.296  
2,188.738,rs2675058,-0.273  
2,188.796,rs17706149,-0.266  
2,188.868,rs6740639,-0.258  
2,188.897,rs17758692,-0.259  
2,188.991,rs1972947,-0.288  
2,189.006,rs7559989,-0.307  
2,189.049,rs10497616,-0.362  
2,189.056,rs6434026,-0.372  
2,189.068,rs2368443,-0.380  
2,189.071,rs9288091,-0.382  
2,189.080,rs2368446,-0.339  
2,189.102,rs12693351,-0.364  
2,189.134,rs2119047,-0.347  
2,189.261,rs719736,-0.349  
2,189.272,rs1372949,-0.353  
2,189.293,rs6751688,-0.397  
2,189.394,rs1366840,-0.430  
2,189.457,rs11683056,-0.424  
2,189.476,rs850882,-0.430  
2,189.482,rs17403192,-0.432  
2,189.529,rs2193615,-0.406  
2,189.566,rs10931206,-0.365  
2,189.671,rs13397032,-0.386  
2,189.683,rs3911239,-0.401  
2,189.705,rs930657,-0.440  
2,189.711,rs2370708,-0.421  
2,189.715,rs2887833,-0.408  
2,189.863,rs7601254,-0.449  
2,189.900,rs10153820,-0.443  
2,189.960,rs4667193,-0.434  
2,190.011,rs1317323,-0.407  
2,190.016,rs10170218,-0.406  
2,190.036,rs10497689,-0.410  
2,190.055,rs16829731,-0.410  
2,190.126,rs13008931,-0.413  
2,190.131,rs9288155,-0.413  
2,190.206,rs16830208,-0.406  
2,190.287,rs1878204,-0.400  
2,190.298,rs11686968,-0.395  
2,190.299,rs17357652,-0.396  
2,190.318,rs3106796,-0.402  
2,190.411,rs4667274,-0.342  
2,190.501,rs10194053,-0.353  
2,190.534,rs17271148,-0.355  
2,190.555,rs2352267,-0.357  
2,190.577,rs7568054,-0.371  
2,190.692,rs256546,-0.383  
2,190.779,rs785247,-0.303  
2,190.783,rs785237,-0.299  
2,190.810,rs2562817,-0.284  
2,190.822,rs785248,-0.278  
2,190.827,rs785209,-0.273  
2,190.888,rs2664253,-0.214  
2,190.909,rs291467,-0.210  
2,190.939,rs1866852,-0.203  
2,191.111,rs13392968,-0.196  
2,191.638,rs1263128,-0.191  
2,192.188,rs3771300,-0.192  
2,192.313,rs6740131,-0.189  
2,192.410,rs1517352,-0.182

2,192.604,rs7572482,-0.169  
2,192.770,rs6728759,-0.177  
2,192.835,rs6713885,-0.147  
2,192.896,rs6737786,-0.126  
2,193.227,rs3935827,-0.116  
2,193.914,rs4386269,-0.086  
2,194.387,rs1838821,-0.036  
2,194.403,rs2357135,-0.028  
2,194.408,rs10931548,-0.025  
2,194.412,rs10173564,-0.024  
2,194.414,rs2357149,-0.024  
2,194.417,rs1484900,-0.023  
2,194.442,rs1439664,-0.020  
2,194.467,rs2218495,-0.017  
2,194.482,rs4547545,-0.017  
2,194.526,rs7589368,-0.006  
2,194.548,rs6713417,-0.007  
2,194.569,rs17585833,-0.007  
2,194.596,rs10209427,-0.008  
2,194.619,rs7600163,-0.006  
2,194.630,rs1607345,-0.005  
2,194.667,rs2360101,-0.010  
2,194.682,rs16831761,-0.010  
2,194.691,rs1528003,-0.010  
2,194.957,rs801340,-0.011  
2,195.006,rs765677,-0.012  
2,195.182,rs2217471,-0.013  
2,195.210,rs6731550,-0.011  
2,195.286,rs1606127,-0.002  
2,195.290,rs1849067,-0.002  
2,195.291,rs2667160,-0.005  
2,195.411,rs985978,-0.006  
2,195.497,rs777289,-0.003  
2,195.608,rs1524035,-0.002  
2,195.634,rs6731123,-0.001  
2,195.654,rs7559362,-0.001  
2,195.807,rs10931700,-0.002  
2,195.966,rs1026628,-0.003  
2,196.010,rs12613279,-0.002  
2,196.261,rs6434859,-0.003  
2,196.283,rs10497786,-0.002  
2,196.510,rs6434873,-0.002  
2,196.575,rs1064213,-0.000  
2,196.635,rs11681576,-0.002  
2,196.733,rs714644,-0.003  
2,196.979,rs1379020,-0.008  
2,196.993,rs1456550,-0.009  
2,197.192,rs12477557,-0.011  
2,197.230,rs2215023,-0.010  
2,197.597,rs16830242,-0.000  
2,197.606,rs12477961,-0.000  
2,197.610,rs10199690,-0.000  
2,197.660,rs2048968,-0.008  
2,197.678,rs13035389,-0.015  
2,197.695,rs1518095,-0.029  
2,197.756,rs11901699,-0.027  
2,197.770,rs13012540,-0.026  
2,197.785,rs2881208,-0.025  
2,197.879,rs12611872,-0.033  
2,197.881,rs12615435,-0.033  
2,197.911,rs10931878,-0.031

2,197.945,rs17628965,-0.029  
2,197.947,rs2577850,-0.028  
2,198.354,rs1729413,-0.039  
2,198.417,rs1835720,-0.042  
2,198.588,rs1561296,-0.038  
2,198.593,rs1370558,-0.038  
2,198.599,rs3769439,-0.037  
2,198.632,rs13019534,-0.038  
2,198.640,rs713396,-0.040  
2,198.650,rs10084263,-0.057  
2,198.677,rs4674449,-0.073  
2,199.025,rs3769825,-0.116  
2,199.041,rs2293554,-0.118  
2,199.237,rs11694706,-0.146  
2,199.561,rs2676325,-0.174  
2,199.601,rs11894115,-0.167  
2,199.667,rs10931967,-0.133  
2,199.688,rs1208083,-0.129  
2,199.712,rs1914267,-0.139  
2,199.755,rs970595,-0.165  
2,199.821,rs2882324,-0.193  
2,199.859,rs12472067,-0.192  
2,199.907,rs6725131,-0.160  
2,199.930,rs10210937,-0.117  
2,199.947,rs6722215,-0.140  
2,199.952,rs7571877,-0.146  
2,200.055,rs1521880,-0.163  
2,200.084,rs6748072,-0.154  
2,200.167,rs13015146,-0.148  
2,200.463,rs6751210,-0.153  
2,200.564,rs17807135,-0.148  
2,200.612,rs17406900,-0.126  
2,200.635,rs1864466,-0.125  
2,200.809,rs10176600,-0.130  
2,200.821,rs13013366,-0.119  
2,200.873,rs10932017,-0.068  
2,200.930,rs1018361,-0.052  
2,201.004,rs733618,-0.045  
2,201.047,rs6748358,-0.042  
2,201.057,rs10197319,-0.043  
2,201.171,rs1896286,-0.043  
2,201.236,rs3096735,-0.046  
2,201.256,rs3096734,-0.046  
2,201.430,rs1344637,-0.051  
2,201.485,rs7580465,-0.052  
2,201.501,rs4419220,-0.051  
2,201.508,rs4673287,-0.051  
2,201.552,rs6714929,-0.056  
2,201.625,rs4675431,-0.101  
2,201.651,rs4673291,-0.103  
2,201.682,rs723021,-0.106  
2,201.823,rs6435232,-0.152  
2,201.857,rs4132730,-0.164  
2,201.905,rs6435238,-0.182  
2,202.047,rs6743255,-0.166  
2,202.088,rs4675467,-0.166  
2,202.419,rs16836582,-0.161  
2,202.577,rs6733159,-0.161  
2,202.694,rs6435265,-0.171  
2,202.697,rs236830,-0.171  
2,202.875,rs4675490,-0.144

2,202.913,rs2289025,-0.146  
2,203.040,rs10932099,-0.157  
2,203.122,rs11682188,-0.164  
2,203.277,rs10490292,-0.177  
2,203.452,rs4675528,-0.197  
2,203.621,rs1079943,-0.185  
2,203.679,rs759455,-0.196  
2,203.698,rs849511,-0.260  
2,203.699,rs10932122,-0.260  
2,203.799,rs861079,-0.301  
2,203.809,rs849523,-0.268  
2,203.832,rs1996412,-0.269  
2,203.847,rs10180293,-0.265  
2,203.885,rs3770996,-0.274  
2,203.892,rs1990708,-0.281  
2,203.911,rs10932127,-0.306  
2,203.913,rs2041915,-0.274  
2,203.943,rs10182735,-0.255  
2,204.005,rs1861619,-0.178  
2,204.048,rs4673340,-0.171  
2,204.052,rs7562683,-0.198  
2,204.053,rs4675571,-0.198  
2,204.213,rs3732083,-0.187  
2,204.248,rs4675602,-0.176  
2,204.283,rs4675612,-0.179  
2,204.408,rs2300965,-0.184  
2,204.416,rs759845,-0.185  
2,204.531,rs10932158,-0.215  
2,204.536,rs4673360,-0.217  
2,204.584,rs10490746,-0.223  
2,204.598,rs16838621,-0.224  
2,204.615,rs1001110,-0.228  
2,204.751,rs7581388,-0.234  
2,204.767,rs2042135,-0.225  
2,204.792,rs6728532,-0.202  
2,204.872,rs7563853,-0.201  
2,204.873,rs2080711,-0.201  
2,204.874,rs6732038,-0.200  
2,204.886,rs764487,-0.192  
2,204.917,rs6435369,-0.174  
2,204.918,rs716630,-0.175  
2,204.920,rs6739693,-0.176  
2,204.922,rs2072570,-0.179  
2,204.925,rs6732962,-0.183  
2,204.939,rs2194374,-0.203  
2,204.940,rs6435370,-0.203  
2,204.962,rs4675672,-0.202  
2,205.004,rs2709376,-0.200  
2,205.038,rs7591784,-0.199  
2,205.060,rs9646834,-0.198  
2,205.094,rs2663867,-0.196  
2,205.109,rs2663887,-0.197  
2,205.198,rs4675713,-0.190  
2,205.207,rs10188753,-0.185  
2,205.289,rs17537169,-0.185  
2,205.359,rs2621472,-0.205  
2,205.423,rs6435401,-0.281  
2,205.577,rs896637,-0.308  
2,205.640,rs796283,-0.253  
2,205.641,rs2854711,-0.253  
2,205.679,rs6738940,-0.228

2,205.716,rs13387151,-0.228  
2,205.767,rs3769521,-0.229  
2,205.914,rs4675764,-0.229  
2,206.194,rs6435467,-0.221  
2,206.195,rs1377908,-0.221  
2,206.245,rs13020347,-0.224  
2,206.294,rs1921735,-0.203  
2,206.338,rs10202412,-0.209  
2,206.470,rs10183434,-0.193  
2,206.498,rs4417658,-0.176  
2,206.523,rs2370833,-0.189  
2,206.632,rs7584375,-0.208  
2,206.890,rs10932321,-0.203  
2,206.900,rs2048277,-0.200  
2,207.048,rs10932334,-0.194  
2,207.118,rs10515951,-0.195  
2,207.169,rs12468557,-0.197  
2,207.190,rs2287598,-0.200  
2,207.196,rs12997383,-0.200  
2,207.295,rs10195020,-0.208  
2,207.360,rs6726552,-0.205  
2,207.463,rs7567073,-0.234  
2,207.488,rs191180,-0.246  
2,207.537,rs1469926,-0.255  
2,207.692,rs2371172,-0.277  
2,207.764,rs10209471,-0.274  
2,207.772,rs13007747,-0.304  
2,207.948,rs16846161,-0.301  
2,207.955,rs10165449,-0.300  
2,207.968,rs17747388,-0.301  
2,208.051,rs6725395,-0.326  
2,208.054,rs16846352,-0.324  
2,208.055,rs6435632,-0.324  
2,208.093,rs6747637,-0.294  
2,208.097,rs10932384,-0.307  
2,208.100,rs11895509,-0.324  
2,208.107,rs10497945,-0.320  
2,208.133,rs17335169,-0.298  
2,208.206,rs10497948,-0.244  
2,208.257,rs6725181,-0.222  
2,208.290,rs2371276,-0.212  
2,208.303,rs6435659,-0.190  
2,208.319,rs6745717,-0.196  
2,208.386,rs10932398,-0.263  
2,208.417,rs7588431,-0.280  
2,208.443,rs4672626,-0.280  
2,208.481,rs714393,-0.279  
2,208.569,rs16847171,-0.299  
2,208.606,rs7598440,-0.304  
2,208.905,rs6715314,-0.328  
2,208.925,rs1402766,-0.326  
2,208.938,rs10497961,-0.325  
2,208.952,rs6755027,-0.324  
2,208.998,rs1915748,-0.316  
2,209.063,rs2135161,-0.305  
2,209.125,rs1910866,-0.303  
2,209.285,rs6435721,-0.327  
2,209.291,rs11674822,-0.312  
2,209.296,rs7580519,-0.298  
2,209.299,rs6731231,-0.328  
2,209.320,rs17332777,-0.326



2,209.465,rs6435735,-0.311  
2,209.568,rs6715589,-0.258  
2,209.606,rs16849449,-0.250  
2,209.607,rs11893132,-0.250  
2,209.612,rs4672667,-0.249  
2,209.689,rs7577413,-0.245  
2,209.805,rs1530239,-0.256  
2,209.862,rs920525,-0.261  
2,209.900,rs3768788,-0.264  
2,209.945,rs7571939,-0.266  
2,210.083,rs2708175,-0.257  
2,210.463,rs13007000,-0.233  
2,210.706,rs11675561,-0.227  
2,210.741,rs1397354,-0.202  
2,210.894,rs7581545,-0.191  
2,210.932,rs13007666,-0.205  
2,211.056,rs1912169,-0.252  
2,211.100,rs1912190,-0.262  
2,211.167,rs4585026,-0.261  
2,211.172,rs3924563,-0.262  
2,211.297,rs4673851,-0.266  
2,211.326,rs10932543,-0.266  
2,211.450,rs4672722,-0.276  
2,211.522,rs6720448,-0.286  
2,211.523,rs7586962,-0.286  
2,211.577,rs10498020,-0.279  
2,211.613,rs16852755,-0.271  
2,211.765,rs4672731,-0.289  
2,211.857,rs4533467,-0.311  
2,211.917,rs10171715,-0.311  
2,211.936,rs2030628,-0.311  
2,211.952,rs16853324,-0.308  
2,212.056,rs7419736,-0.281  
2,212.150,rs4531931,-0.255  
2,212.182,rs4673981,-0.297  
2,212.196,rs10498034,-0.265  
2,212.199,rs1464864,-0.266  
2,212.367,rs7604984,-0.257  
2,212.799,rs12694364,-0.227  
2,213.196,rs13034471,-0.192  
2,213.200,rs11890356,-0.192  
2,213.307,rs1898716,-0.179  
2,213.398,rs2678272,-0.154  
2,213.531,rs2678289,-0.157  
2,213.568,rs6744457,-0.155  
2,213.645,rs12992226,-0.159  
2,213.667,rs4674024,-0.151  
2,213.808,rs12694376,-0.133  
2,213.838,rs6704859,-0.142  
2,213.849,rs10932631,-0.132  
2,213.868,rs4674039,-0.103  
2,213.883,rs6740786,-0.107  
2,213.890,rs1344695,-0.112  
2,213.901,rs10211101,-0.117  
2,213.909,rs3770530,-0.150  
2,213.940,rs3770545,-0.154  
2,213.952,rs3770546,-0.136  
2,213.955,rs11676895,-0.132  
2,213.958,rs3755155,-0.129  
2,213.960,rs3770560,-0.129  
2,213.966,rs3770564,-0.128

2,214.040,rs16855357,-0.122  
2,214.122,rs828704,-0.115  
2,214.190,rs207946,-0.118  
2,214.293,rs207873,-0.137  
2,214.323,rs2544066,-0.134  
2,214.366,rs16855901,-0.123  
2,214.397,rs6756590,-0.115  
2,214.400,rs12467575,-0.114  
2,214.443,rs4672798,-0.101  
2,214.469,rs784548,-0.080  
2,214.594,rs3755140,-0.078  
2,214.647,rs4550645,-0.076  
2,214.714,rs4234019,-0.088  
2,214.722,rs7590938,-0.090  
2,214.760,rs1525608,-0.071  
2,214.774,rs2372848,-0.067  
2,214.812,rs2067041,-0.055  
2,214.833,rs7420849,-0.038  
2,214.843,rs3770472,-0.039  
2,214.890,rs2372868,-0.048  
2,215.312,rs2712163,-0.051  
2,215.639,rs1179726,-0.053  
2,215.645,rs2241191,-0.053  
2,215.729,rs2705592,-0.059  
2,215.787,rs1882421,-0.087  
2,215.794,rs2705594,-0.090  
2,215.829,rs10171745,-0.097  
2,215.856,rs13387042,-0.102  
2,215.904,rs7579306,-0.130  
2,215.913,rs6739040,-0.127  
2,215.941,rs13015994,-0.116  
2,215.944,rs6723845,-0.118  
2,215.948,rs12466929,-0.121  
2,216.001,rs1864444,-0.178  
2,216.010,rs2195610,-0.194  
2,216.358,rs2373067,-0.177  
2,216.488,rs16857774,-0.167  
2,216.694,rs7596630,-0.150  
2,217.059,rs2052928,-0.126  
2,217.119,rs4674213,-0.122  
2,217.128,rs3747,-0.122  
2,217.165,rs2552527,-0.108  
2,217.173,rs6729308,-0.109  
2,217.205,rs3791978,-0.130  
2,217.266,rs3791938,-0.140  
2,217.310,rs890051,-0.182  
2,217.328,rs3791911,-0.185  
2,217.355,rs6753621,-0.179  
2,217.463,rs876961,-0.194  
2,217.554,rs4672869,-0.203  
2,217.559,rs6436025,-0.203  
2,217.752,rs10206984,-0.217  
2,218.039,rs3731863,-0.143  
2,218.051,rs1059823,-0.139  
2,218.420,rs12989189,-0.089  
2,218.690,rs4674345,-0.056  
2,218.765,rs751135,-0.033  
2,218.915,rs7581721,-0.024  
2,218.934,rs359980,-0.023  
2,218.988,rs371825,-0.021  
2,219.571,rs1043160,-0.013

2,220.125,rs7596956,-0.010  
2,220.357,rs6436140,-0.008  
2,220.565,rs6717249,-0.007  
2,220.769,rs1058261,-0.007  
2,220.917,rs10932806,-0.007  
2,221.247,rs746233,-0.017  
2,221.360,rs7588807,-0.015  
2,221.362,rs684428,-0.028  
2,221.398,rs678134,-0.015  
2,221.402,rs7569439,-0.013  
2,221.404,rs10498067,-0.019  
2,221.406,rs6733609,-0.018  
2,221.423,rs12476246,-0.011  
2,221.432,rs6749528,-0.011  
2,221.438,rs17575566,-0.011  
2,221.452,rs16860370,-0.017  
2,221.459,rs7590480,-0.018  
2,221.460,rs7557937,-0.011  
2,221.470,rs12694490,-0.009  
2,221.488,rs17288469,-0.015  
2,221.492,rs750764,-0.023  
2,221.519,rs2385844,-0.031  
2,221.530,rs995842,-0.032  
2,221.540,rs6756097,-0.021  
2,221.608,rs13383613,-0.015  
2,221.628,rs12694510,-0.014  
2,221.646,rs10932835,-0.013  
2,222.068,rs6747324,-0.010  
2,222.120,rs4143572,-0.011  
2,222.264,rs2068114,-0.019  
2,222.290,rs4549077,-0.021  
2,222.386,rs4611634,-0.019  
2,222.449,rs1922772,-0.018  
2,222.539,rs1955401,-0.015  
2,222.597,rs2392716,-0.014  
2,222.655,rs1796432,-0.012  
2,222.764,rs6719602,-0.015  
2,222.957,rs16861659,-0.010  
2,223.119,rs10183570,-0.006  
2,223.189,rs2893611,-0.005  
2,223.260,rs4674556,-0.001  
2,223.297,rs1463991,-0.001  
2,223.742,rs634813,-0.004  
2,223.746,rs630054,-0.003  
2,223.748,rs617222,-0.003  
2,223.759,rs1550068,-0.001  
2,224.042,rs1369327,-0.001  
2,224.150,rs2019083,-0.000  
2,224.177,rs7603664,0.000  
2,224.230,rs7559847,0.001  
2,224.389,rs1991736,0.001  
2,224.390,rs4359642,0.001  
2,224.448,rs1346801,0.001  
2,224.511,rs6737417,0.001  
2,224.662,rs2303901,0.001  
2,224.837,rs2710508,0.000  
2,224.878,rs10498118,0.000  
2,224.908,rs2680835,0.000  
2,224.917,rs10804299,0.001  
2,225.030,rs13414424,0.006  
2,225.058,rs10210217,0.008

2,225.131,rs824921,0.009  
2,225.184,rs889838,0.009  
2,225.213,rs6738997,0.017  
2,225.246,rs6738615,0.014  
2,225.285,rs348980,0.015  
2,225.296,rs13389057,0.015  
2,225.328,rs16863360,0.016  
2,225.334,rs6728176,0.016  
2,225.340,rs10932941,0.016  
2,225.406,rs6710838,0.016  
2,225.520,rs6436304,0.021  
2,225.521,rs1367415,0.021  
2,225.522,rs11695486,0.020  
2,225.592,rs930140,0.023  
2,225.627,rs6436310,0.021  
2,225.777,rs4673017,0.024  
2,225.921,rs7604173,0.017  
2,225.935,rs735678,0.015  
2,225.958,rs2033694,0.018  
2,225.974,rs17562982,0.021  
2,226.200,rs4674677,0.037  
2,226.225,rs6710583,0.038  
2,226.253,rs10173147,0.056  
2,226.259,rs2084288,0.056  
2,226.264,rs6723091,0.056  
2,226.296,rs959327,0.057  
2,226.394,rs6751670,0.049  
2,226.453,rs12105595,0.050  
2,226.533,rs6436364,0.049  
2,226.583,rs1440063,0.060  
2,226.869,rs2203733,0.033  
2,226.968,rs1517628,0.014  
2,227.030,rs1517641,0.015  
2,227.066,rs2395982,0.021  
2,227.079,rs2395983,0.025  
2,227.119,rs16864788,0.024  
2,227.182,rs1371549,0.021  
2,227.226,rs2894511,0.018  
2,227.233,rs13402129,0.019  
2,227.298,rs4673070,0.023  
2,227.322,rs893451,0.031  
2,227.332,rs7589996,0.033  
2,227.354,rs582758,0.033  
2,227.463,rs7564664,0.037  
2,227.477,rs6740877,0.036  
2,227.587,rs6738983,0.032  
2,227.600,rs7590948,0.026  
2,227.681,rs13016085,0.017  
2,227.884,rs2098533,0.021  
2,227.913,rs12623539,0.025  
2,227.955,rs10170836,0.032  
2,228.015,rs1568751,0.043  
2,228.025,rs4674908,0.045  
2,228.036,rs16866004,0.045  
2,228.375,rs6717108,0.060  
2,228.530,rs6436508,0.044  
2,228.564,rs4674940,0.043  
2,228.590,rs11693393,0.044  
2,228.613,rs7605551,0.045  
2,228.638,rs12052387,0.046  
2,228.680,rs7558808,0.039

2,228.724,rs6436519,0.028  
2,228.731,rs10498177,0.027  
2,228.740,rs281525,0.026  
2,228.797,rs10172797,0.022  
2,228.852,rs7568255,0.020  
2,228.855,rs16866521,0.020  
2,228.909,rs2165927,0.020  
2,228.984,rs12467977,0.013  
2,228.986,rs6728230,0.013  
2,229.021,rs6743368,0.007  
2,229.049,rs6436551,0.005  
2,229.081,rs1897229,0.005  
2,229.088,rs10804326,0.005  
2,229.099,rs1993323,0.006  
2,229.126,rs10187044,0.007  
2,229.132,rs974412,0.008  
2,229.138,rs9288611,0.021  
2,229.157,rs1190116,0.021  
2,229.243,rs13428728,0.023  
2,229.297,rs16866816,0.025  
2,229.532,rs2713538,0.035  
2,229.556,rs6436607,0.035  
2,229.606,rs2396306,0.036  
2,229.631,rs2396328,0.036  
2,229.760,rs4600636,0.031  
2,229.848,rs13392647,0.028  
2,229.911,rs11674718,0.028  
2,230.159,rs876496,0.026  
2,230.452,rs2707537,0.036  
2,230.477,rs1922529,0.035  
2,230.491,rs10427370,0.022  
2,230.494,rs1922531,0.020  
2,230.539,rs6725330,0.022  
2,230.548,rs10933155,0.022  
2,230.660,rs7574757,0.025  
2,230.667,rs7558081,0.026  
2,230.668,rs6758296,0.026  
2,230.697,rs11675161,0.039  
2,230.747,rs2396453,0.039  
2,230.767,rs10498217,0.044  
2,230.802,rs1922021,0.053  
2,230.825,rs6735744,0.054  
2,230.861,rs2204862,0.060  
2,230.870,rs6436661,0.068  
2,230.873,rs4325745,0.070  
2,230.931,rs6436664,0.084  
2,230.948,rs13028299,0.084  
2,231.235,rs7560053,0.099  
2,231.292,rs4234072,0.093  
2,231.297,rs11686056,0.092  
2,231.340,rs6749521,0.088  
2,231.384,rs4673194,0.087  
2,231.718,rs4129709,0.123  
2,231.800,rs2176189,0.141  
2,231.827,rs10933198,0.152  
2,231.872,rs4973161,0.168  
2,231.892,rs10204702,0.174  
2,231.903,rs6436723,0.163  
2,231.906,rs12469987,0.159  
2,231.908,rs6730730,0.159  
2,231.909,rs7568490,0.163

2,231.912,rs2396465,0.178  
2,231.961,rs7585777,0.170  
2,232.005,rs7567984,0.143  
2,232.027,rs7585481,0.181  
2,232.046,rs2396492,0.205  
2,232.054,rs4973237,0.215  
2,232.093,rs11673884,0.241  
2,232.103,rs4972941,0.229  
2,232.111,rs7595272,0.214  
2,232.162,rs12994381,0.205  
2,232.163,rs11886482,0.205  
2,232.194,rs7340134,0.213  
2,232.266,rs940339,0.235  
2,232.280,rs950817,0.241  
2,232.419,rs16824126,0.271  
2,232.482,rs1721355,0.275  
2,232.563,rs1715826,0.288  
2,232.664,rs11680053,0.311  
2,232.706,rs3811514,0.307  
2,232.964,rs6436755,0.266  
2,233.050,rs7570716,0.263  
2,233.357,rs1528218,0.250  
2,233.390,rs13021389,0.248  
2,233.458,rs929925,0.216  
2,233.616,rs7573585,0.213  
2,233.634,rs6738261,0.214  
2,233.644,rs10933256,0.217  
2,234.125,rs9288639,0.281  
2,234.149,rs2396595,0.284  
2,234.196,rs10203445,0.276  
2,234.227,rs7559725,0.269  
2,234.233,rs1544688,0.267  
2,234.250,rs7594377,0.261  
2,234.261,rs2109818,0.255  
2,234.263,rs2215598,0.254  
2,234.272,rs13034774,0.248  
2,234.295,rs2396611,0.241  
2,234.306,rs990672,0.237  
2,234.319,rs17676036,0.234  
2,234.355,rs3845826,0.233  
2,234.548,rs4973171,0.268  
2,234.718,rs883731,0.262  
2,234.776,rs6747101,0.255  
2,234.818,rs1227003,0.248  
2,234.943,rs4973184,0.233  
2,235.060,rs4973190,0.239  
2,235.069,rs9288645,0.239  
2,235.223,rs12694811,0.183  
2,235.276,rs12694814,0.182  
2,235.321,rs12620995,0.180  
2,235.330,rs7597072,0.179  
2,235.333,rs10187046,0.188  
2,235.341,rs10197959,0.213  
2,235.356,rs11695055,0.233  
2,235.369,rs7589154,0.246  
2,235.428,rs17581619,0.223  
2,235.458,rs10490186,0.223  
2,235.469,rs1861617,0.222  
2,235.502,rs12052464,0.227  
2,235.533,rs208789,0.296  
2,235.737,rs488007,0.275

2,236.164,rs13407773,0.222  
2,236.179,rs4973245,0.220  
2,236.209,rs4375854,0.207  
2,236.259,rs4613264,0.218  
2,236.264,rs10169375,0.218  
2,236.364,rs6436908,0.210  
2,236.422,rs4972939,0.208  
2,236.432,rs17327304,0.208  
2,236.443,rs6436915,0.208  
2,236.475,rs2114591,0.206  
2,236.530,rs3177554,0.212  
2,236.591,rs12477362,0.219  
2,236.687,rs3769845,0.233  
2,236.775,rs11896138,0.249  
2,236.864,rs12105723,0.268  
2,236.894,rs7590429,0.274  
2,236.946,rs9678342,0.275  
2,237.050,rs1649883,0.286  
2,237.066,rs3856529,0.287  
2,237.196,rs9288668,0.293  
2,237.208,rs1678192,0.288  
2,237.263,rs2288356,0.260  
2,237.286,rs6742549,0.244  
2,237.337,rs4972964,0.240  
2,237.380,rs4435442,0.240  
2,237.414,rs7590845,0.250  
2,237.478,rs13409720,0.272  
2,237.496,rs4973343,0.277  
2,237.772,rs881109,0.311  
2,237.795,rs7579281,0.310  
2,237.807,rs10182071,0.310  
2,237.828,rs2466150,0.307  
2,237.863,rs4972973,0.315  
2,237.969,rs3111780,0.378  
2,238.059,rs6757356,0.454  
2,238.066,rs3106301,0.422  
2,238.104,rs10933363,0.431  
2,238.109,rs6736980,0.432  
2,238.145,rs2175149,0.432  
2,238.253,rs4973377,0.439  
2,238.330,rs753855,0.459  
2,238.355,rs1729077,0.457  
2,238.399,rs2290275,0.460  
2,238.457,rs1729089,0.469  
2,238.509,rs10445829,0.474  
2,238.522,rs11890076,0.462  
2,238.538,rs10186875,0.447  
2,238.547,rs4973401,0.441  
2,238.572,rs4973410,0.446  
2,238.610,rs7580705,0.449  
2,238.635,rs12992677,0.451  
2,238.693,rs13384421,0.433  
2,238.696,rs2060413,0.433  
2,238.741,rs6710658,0.426  
2,238.762,rs4530357,0.438  
2,238.795,rs2070936,0.506  
2,238.798,rs838437,0.509  
2,238.980,rs2679184,0.484  
2,238.988,rs3107179,0.483  
2,239.096,rs3100612,0.444  
2,239.719,rs12996863,0.354

2,239.794,rs2678484,0.297  
2,239.827,rs12616972,0.285  
2,239.880,rs2697806,0.287  
2,239.921,rs2117770,0.190  
2,240.058,rs17296210,0.173  
2,240.080,rs7571133,0.186  
2,240.097,rs871688,0.178  
2,240.140,rs11550699,0.184  
2,240.397,rs10211596,0.108  
2,240.729,rs2004203,0.081  
2,240.843,rs10933421,0.072  
2,240.891,rs13383577,0.088  
2,240.892,rs3811589,0.088  
2,240.963,rs4257390,0.102  
2,240.984,rs7425956,0.102  
2,241.016,rs9750891,0.106  
2,241.025,rs7570061,0.108  
2,241.038,rs9288685,0.110  
2,241.051,rs10200271,0.114  
2,241.194,rs6720896,0.167  
2,241.224,rs3890760,0.174  
2,241.264,rs4663784,0.181  
2,241.265,rs3792117,0.181  
2,241.274,rs4663834,0.183  
2,241.285,rs7580869,0.176  
2,241.315,rs2341565,0.185  
2,241.326,rs10211468,0.195  
2,241.604,rs3792091,0.273  
2,241.841,rs2242102,0.330  
2,242.206,rs4129945,0.355  
2,242.388,rs7571337,0.349  
2,242.490,rs12988520,0.358  
2,242.512,rs4663325,0.352  
2,242.676,rs6717546,0.307  
2,242.722,rs10207194,0.311  
2,242.734,rs741160,0.313  
2,242.742,rs13018934,0.293  
2,242.754,rs6716168,0.277  
2,242.802,rs7606893,0.238  
2,242.873,rs2286430,0.217  
2,243.064,rs758277,0.179  
2,243.082,rs12473889,0.178  
2,243.142,rs11563212,0.174  
2,243.159,rs13401339,0.184  
2,243.179,rs13414162,0.196  
2,243.192,rs4663992,0.197  
2,243.221,rs11563056,0.267  
2,243.240,rs6723922,0.291  
2,243.290,rs1987842,0.331  
2,243.291,rs10084247,0.331  
2,243.292,rs17866592,0.332  
2,243.315,rs1395835,0.338  
2,243.320,rs17866606,0.338  
2,243.327,rs10190663,0.337  
2,243.450,rs250958,0.298  
2,243.554,rs250900,0.285  
2,243.566,rs1860700,0.283  
2,243.576,rs12617590,0.282  
2,243.793,rs10929015,0.238  
2,244.003,rs11695811,0.209  
2,244.083,rs772789,0.193



2,244.086,rs772788,0.192  
2,244.227,rs9784089,0.181  
2,244.236,rs2136261,0.182  
2,244.373,rs4663416,0.185  
2,244.390,rs11883650,0.187  
2,244.445,rs11900995,0.202  
2,244.466,rs3115360,0.191  
2,244.540,rs10803620,0.215  
2,244.652,rs940942,0.286  
2,244.690,rs7576760,0.292  
2,244.718,rs940947,0.293  
2,244.722,rs4663447,0.295  
2,244.736,rs10190832,0.289  
2,244.768,rs1880742,0.275  
2,245.022,rs4271722,0.260  
2,245.024,rs7607157,0.259  
2,245.043,rs2380262,0.286  
2,245.101,rs7557724,0.239  
2,245.165,rs7574103,0.208  
2,245.198,rs7605821,0.202  
2,245.310,rs1441612,0.171  
2,245.476,rs1946949,0.185  
2,245.623,rs4663517,0.215  
2,245.625,rs722161,0.216  
2,245.685,rs11684741,0.212  
2,245.728,rs13424401,0.214  
2,246.032,rs6720830,0.138  
2,246.250,rs10190447,0.124  
2,246.333,rs10174126,0.072  
2,246.338,rs10177808,0.071  
2,246.350,rs4318343,0.086  
2,246.369,rs4528714,0.083  
2,246.380,rs13404220,0.084  
2,246.381,rs10177149,0.084  
2,246.399,rs7573787,0.071  
2,246.491,rs7560067,0.098  
2,246.514,rs7568837,0.105  
2,246.670,rs3922490,0.178  
2,246.675,rs4536605,0.180  
2,246.701,rs12478507,0.178  
2,246.791,rs3924658,0.183  
2,246.841,rs12464740,0.180  
2,247.298,rs6710167,0.221  
2,247.379,rs4561612,0.228  
2,247.397,rs13019316,0.228  
2,247.475,rs2163566,0.227  
2,247.561,rs4444469,0.252  
2,247.655,rs4663576,0.253  
2,247.760,rs10201495,0.290  
2,247.764,rs6726521,0.333  
2,247.768,rs7559293,0.325  
2,247.770,rs6717219,0.339  
2,247.838,rs6731727,0.380  
2,247.847,rs11676226,0.386  
2,247.886,rs10177178,0.373  
2,247.989,rs3768969,0.431  
2,248.099,rs12471567,0.504  
2,248.111,rs6760477,0.506  
2,248.365,rs1453117,0.466  
2,248.431,rs6431421,0.425  
2,248.437,rs3768951,0.424

2,248.479,rs1530933,0.416  
2,248.507,rs4663638,0.411  
2,248.679,rs6756597,0.386  
2,248.687,rs13390159,0.418  
2,248.720,rs1377445,0.390  
2,248.766,rs13391114,0.350  
2,248.788,rs2046284,0.340  
2,248.930,rs11897843,0.316  
2,249.029,rs1986988,0.313  
2,249.089,rs10183022,0.309  
2,249.270,rs2720100,0.387  
2,249.387,rs7556982,0.378  
2,249.643,rs4503948,0.378  
2,249.645,rs13029887,0.378  
2,249.685,rs6431487,0.372  
2,250.187,rs7576705,0.415  
2,250.336,rs3748990,0.392  
2,250.588,rs10165956,0.373  
2,250.660,rs4073396,0.333  
2,250.753,rs4490127,0.437  
2,250.838,rs12328617,0.442  
2,250.893,rs11687617,0.438  
2,250.929,rs11676186,0.438  
2,250.940,rs1908970,0.438  
2,250.941,rs4663248,0.438  
2,250.994,rs10929225,0.453  
2,251.113,rs12622722,0.467  
2,251.206,rs1874573,0.362  
2,251.248,rs13431876,0.360  
2,251.391,rs12469894,0.357  
2,251.729,rs6766,0.349  
2,251.841,rs4278886,0.353  
2,251.964,rs6742060,0.364  
2,252.119,rs1565853,0.338  
2,252.421,rs1198819,0.344  
2,252.538,rs6728476,0.276  
2,252.563,rs6746771,0.283  
2,252.575,rs4663269,0.286  
2,252.587,rs6717794,0.294  
2,252.588,rs11680171,0.324  
2,252.589,rs11675777,0.321  
2,252.600,rs1584243,0.296  
2,252.625,rs6729271,0.238  
2,252.665,rs7559272,0.240  
2,252.692,rs4302179,0.236  
2,253.098,rs1562337,0.305  
2,253.221,rs7602358,0.319  
2,253.291,rs2880132,0.294  
2,253.292,rs6722284,0.294  
2,253.997,rs472357,0.293  
2,254.209,rs9287630,0.301  
2,254.224,rs9287631,0.301  
2,254.435,rs7425902,0.273  
2,254.714,rs7571108,0.265  
2,254.729,rs6716943,0.265  
2,254.730,rs11674589,0.265  
2,254.751,rs11673727,0.261  
2,254.848,rs9711993,0.244  
2,254.947,rs9287645,0.226  
2,255.237,rs6736036,0.151  
2,255.239,rs4078406,0.150

2,255.271,rs7558224,0.146  
2,255.382,rs4851976,0.138  
2,255.468,rs3935696,0.166  
2,255.499,rs3922831,0.172  
2,255.506,rs7581424,0.173  
2,255.574,rs11124179,0.178  
2,255.669,rs3791370,0.210  
2,255.732,rs3791399,0.229  
2,255.745,rs3791406,0.232  
2,255.805,rs12469994,0.231  
2,255.820,rs3791471,0.232  
2,255.822,rs3791474,0.233  
2,255.861,rs3791500,0.255  
2,256.013,rs3791603,0.263  
2,256.048,rs291335,0.264  
2,256.228,rs11883623,0.272  
2,256.290,rs925738,0.277  
2,256.412,rs10164440,0.286  
2,256.429,rs2411843,0.287  
2,256.441,rs11680658,0.289  
2,256.514,rs843458,0.300  
2,256.555,rs4851975,0.391  
2,256.573,rs7582778,0.393  
2,256.665,rs1872618,0.386  
2,256.688,rs6710481,0.392  
2,256.755,rs1796449,0.400  
2,256.762,rs13415709,0.404  
2,256.795,rs1564974,0.418  
2,256.888,rs10206786,0.462  
2,256.932,rs4328655,0.503  
2,256.939,rs1882676,0.505  
2,256.966,rs7570018,0.513  
2,257.004,rs11685345,0.476  
2,257.245,rs13419075,0.437  
2,257.362,rs1465820,0.417  
2,257.422,rs11124220,0.368  
2,257.464,rs7566783,0.329  
2,257.553,rs11891511,0.357  
2,257.627,rs4852118,0.342  
2,257.707,rs4852124,0.335  
2,257.723,rs6543576,0.333  
2,257.736,rs11904223,0.333  
2,257.817,rs2412033,0.351  
2,257.921,rs4241236,0.325  
2,257.964,rs11124235,0.305  
2,258.053,rs11894116,0.284  
2,258.223,rs10933613,0.262  
2,258.250,rs13402622,0.258  
2,258.346,rs12695027,0.223  
2,258.439,rs4149549,0.192  
2,258.490,rs6735806,0.176  
2,258.526,rs874060,0.179  
2,258.528,rs11683773,0.180  
2,258.567,rs7587455,0.153  
2,258.712,rs1866645,0.138  
2,258.773,rs12695007,0.151  
2,258.823,rs6719685,0.163  
2,258.827,rs11694467,0.160  
2,258.834,rs13424851,0.155  
2,258.925,rs868379,0.113  
2,258.952,rs7420256,0.101

2,259.230,rs12477831,0.070  
2,259.323,rs2352852,0.056  
2,259.375,rs6750380,0.048  
2,259.417,rs7577243,0.035  
2,259.434,rs3828334,0.032  
2,259.476,rs3811624,0.033  
2,259.503,rs7340350,0.033  
2,259.578,rs4676431,0.028  
2,259.623,rs4676430,0.028  
2,259.740,rs2975758,0.045  
2,259.753,rs3828345,0.047  
2,259.801,rs10933621,0.050  
2,259.861,rs10804410,0.055  
2,259.946,rs10804412,0.061  
2,259.993,rs1001495,0.060  
2,260.003,rs755302,0.060  
2,260.182,rs734586,0.091  
2,260.424,rs4076342,0.105  
2,260.529,rs4430951,0.092  
2,260.565,rs4234091,0.127  
2,260.570,rs4675839,0.111  
2,260.643,rs4675833,0.122  
2,260.674,rs7573476,0.116  
2,260.789,rs12694993,0.124  
2,261.065,rs2074840,0.197  
2,261.219,rs6705421,0.180  
2,261.563,rs757978,0.164  
2,261.627,rs13388333,0.168  
2,261.774,rs7593690,0.206  
2,261.813,rs10175075,0.209  
2,261.835,rs7572476,0.211  
2,261.862,rs7558942,0.187  
2,261.867,rs13004470,0.214  
2,261.889,rs10191556,0.216  
2,262.315,rs12472439,0.213  
2,262.415,rs3892357,0.211  
2,263.024,rs12469535,0.207  
3,0.860,rs990284,-1.569  
3,0.987,rs9878349,-1.581  
3,1.092,rs4685447,-1.617  
3,1.095,rs17006405,-1.618  
3,1.207,rs9310805,-1.678  
3,1.228,rs331892,-1.689  
3,1.265,rs2272522,-1.631  
3,1.296,rs1353811,-1.648  
3,1.354,rs930237,-1.597  
3,1.355,rs3773379,-1.597  
3,1.356,rs3773377,-1.597  
3,1.362,rs11706690,-1.594  
3,1.467,rs1988234,-1.584  
3,1.588,rs1531913,-1.574  
3,1.758,rs9824721,-1.613  
3,1.775,rs9631481,-1.617  
3,1.805,rs1905605,-1.620  
3,1.958,rs2689860,-1.622  
3,2.084,rs10510199,-1.580  
3,2.139,rs1464701,-1.563  
3,2.240,rs4280626,-1.509  
3,2.270,rs11131168,-1.490  
3,2.283,rs10510204,-1.482  
3,2.313,rs6793028,-1.485

3,2.345,rs2727996,-1.540  
3,2.368,rs11719195,-1.607  
3,2.374,rs2729139,-1.623  
3,2.406,rs2872338,-1.771  
3,2.408,rs6782048,-1.678  
3,2.416,rs2130276,-1.741  
3,2.435,rs2036236,-1.849  
3,2.456,rs7632166,-1.873  
3,2.496,rs7644569,-1.920  
3,2.530,rs3913305,-1.802  
3,2.534,rs4082640,-1.800  
3,2.547,rs4085434,-1.795  
3,2.557,rs17037117,-1.813  
3,2.599,rs17291093,-1.836  
3,2.602,rs3772313,-1.837  
3,3.015,rs3796174,-1.770  
3,3.229,rs17038463,-1.780  
3,3.303,rs9875177,-1.783  
3,3.327,rs6791266,-1.784  
3,3.546,rs17039471,-1.785  
3,3.584,rs17193533,-1.781  
3,3.644,rs2648451,-1.724  
3,3.671,rs6781581,-1.785  
3,3.890,rs9820473,-1.780  
3,3.945,rs6779648,-1.747  
3,3.970,rs2046239,-1.743  
3,4.024,rs10510212,-1.750  
3,4.243,rs7634053,-1.802  
3,4.341,rs9883944,-1.817  
3,4.465,rs6771572,-1.866  
3,4.519,rs6796167,-1.897  
3,4.669,rs7631181,-1.971  
3,4.677,rs7610626,-1.975  
3,4.685,rs9818677,-1.978  
3,4.918,rs6763978,-1.866  
3,5.002,rs2727950,-1.814  
3,5.181,rs6777569,-1.612  
3,5.199,rs9825844,-1.585  
3,5.337,rs2727905,-1.432  
3,5.427,rs2727925,-1.439  
3,5.525,rs11720157,-1.422  
3,5.589,rs1178517,-1.414  
3,5.778,rs9841294,-1.368  
3,5.791,rs1720199,-1.372  
3,5.828,rs1967597,-1.367  
3,5.857,rs1685495,-1.361  
3,5.885,rs3856841,-1.346  
3,5.885,rs11715813,-1.345  
3,5.886,rs1827451,-1.344  
3,5.977,rs9828150,-1.130  
3,6.000,rs17015816,-1.051  
3,6.005,rs6793017,-1.028  
3,6.018,rs4685527,-0.973  
3,6.031,rs2616585,-0.957  
3,6.034,rs2728055,-0.960  
3,6.035,rs13314366,-0.966  
3,6.052,rs2728063,-1.098  
3,6.080,rs2619579,-1.130  
3,6.143,rs2728076,-1.152  
3,6.186,rs1600359,-1.158  
3,6.361,rs6804966,-1.141

3,6.449,rs1914009,-1.070  
3,6.526,rs1949342,-1.065  
3,6.654,rs2728047,-1.031  
3,6.754,rs17019466,-1.009  
3,6.757,rs1033237,-1.008  
3,6.771,rs11129265,-1.000  
3,6.990,rs2222104,-1.034  
3,7.138,rs1474021,-1.046  
3,7.193,rs7615939,-1.049  
3,7.292,rs975334,-1.099  
3,7.407,rs11129309,-1.088  
3,7.413,rs6772294,-1.088  
3,7.444,rs1400207,-1.095  
3,7.475,rs6776496,-1.102  
3,7.540,rs9810902,-1.112  
3,7.578,rs17584516,-1.114  
3,7.644,rs11712375,-1.051  
3,7.653,rs9867619,-1.039  
3,7.745,rs7637662,-0.994  
3,7.826,rs6442763,-0.961  
3,7.849,rs4685575,-0.946  
3,8.003,rs17022164,-0.848  
3,8.210,rs6442766,-0.886  
3,8.260,rs6786174,-0.893  
3,8.336,rs344405,-0.902  
3,8.507,rs168165,-0.918  
3,8.757,rs9310923,-0.908  
3,8.883,rs7649063,-0.893  
3,9.031,rs7649378,-0.912  
3,9.046,rs6776572,-0.928  
3,9.097,rs4054727,-1.188  
3,9.106,rs9310935,-1.199  
3,9.115,rs163582,-1.203  
3,9.210,rs2290611,-1.168  
3,9.219,rs3792424,-1.177  
3,9.265,rs3804803,-1.233  
3,9.288,rs3804800,-1.221  
3,9.301,rs334807,-1.267  
3,9.303,rs3804797,-1.263  
3,9.333,rs7647903,-1.146  
3,9.394,rs6793085,-1.111  
3,9.508,rs1153459,-1.054  
3,9.561,rs1278150,-1.049  
3,9.814,rs1669336,-0.994  
3,10.126,rs6768756,-1.155  
3,10.151,rs4685616,-1.169  
3,10.338,rs7622674,-1.263  
3,10.348,rs3846145,-1.264  
3,10.352,rs1153452,-1.268  
3,10.371,rs2322044,-1.276  
3,10.405,rs1995196,-1.291  
3,10.418,rs9835812,-1.301  
3,10.439,rs4142860,-1.316  
3,10.751,rs9874287,-1.275  
3,10.847,rs7634908,-1.281  
3,10.958,rs723168,-1.305  
3,10.977,rs2054873,-1.260  
3,11.354,rs4685672,-1.175  
3,11.390,rs17293711,-1.175  
3,11.390,rs2874754,-1.174  
3,11.400,rs1873023,-1.168

3,11.417,rs4685676,-1.155  
3,11.462,rs983154,-1.122  
3,11.576,rs1312821,-1.166  
3,11.599,rs6796414,-1.174  
3,11.653,rs769787,-1.191  
3,11.709,rs12629402,-1.210  
3,11.732,rs769798,-1.218  
3,11.778,rs17362851,-1.202  
3,11.842,rs711540,-1.232  
3,11.844,rs2119809,-1.232  
3,12.236,rs13075986,-1.232  
3,12.928,rs1087817,-1.246  
3,12.969,rs795727,-1.229  
3,12.987,rs711676,-1.284  
3,13.133,rs795302,-1.233  
3,13.563,rs310731,-1.369  
3,13.662,rs711673,-1.398  
3,13.782,rs11915920,-1.401  
3,13.832,rs11919486,-1.424  
3,13.890,rs17040638,-1.448  
3,14.059,rs17040736,-1.502  
3,14.185,rs1038639,-1.531  
3,14.224,rs304053,-1.560  
3,14.246,rs304006,-1.575  
3,14.291,rs9822773,-1.529  
3,14.309,rs11923960,-1.418  
3,14.353,rs6804671,-1.408  
3,14.406,rs4684427,-1.374  
3,14.456,rs931503,-1.326  
3,14.458,rs2029665,-1.326  
3,14.510,rs4685785,-1.363  
3,14.540,rs17709863,-1.375  
3,14.660,rs9311395,-1.394  
3,14.755,rs931389,-1.421  
3,14.788,rs6786487,-1.429  
3,14.797,rs3828437,-1.463  
3,14.799,rs1866997,-1.483  
3,14.800,rs6785305,-1.502  
3,14.833,rs3805011,-1.456  
3,14.887,rs1018109,-1.526  
3,14.926,rs2291862,-1.513  
3,15.006,rs4685829,-1.434  
3,15.013,rs11708908,-1.344  
3,15.018,rs11711879,-1.276  
3,15.019,rs12493413,-1.328  
3,15.019,rs3805032,-1.268  
3,15.034,rs3805036,-1.399  
3,15.156,rs3762781,-1.417  
3,15.177,rs6807140,-1.355  
3,15.287,rs6442919,-1.339  
3,15.298,rs1955179,-1.337  
3,15.329,rs7638383,-1.330  
3,15.410,rs908078,-1.343  
3,15.416,rs11925620,-1.340  
3,15.427,rs2137947,-1.335  
3,15.462,rs4532119,-1.327  
3,15.552,rs9858342,-1.370  
3,15.588,rs17041935,-1.376  
3,15.629,rs2570008,-1.379  
3,15.644,rs6782593,-1.457  
3,15.650,rs9828404,-1.461

3,15.717,rs2671758,-1.493  
3,15.868,rs11925441,-1.436  
3,15.994,rs341981,-1.389  
3,16.055,rs341973,-1.382  
3,16.070,rs3846158,-1.377  
3,16.164,rs9879338,-1.314  
3,16.183,rs7638016,-1.305  
3,16.276,rs407334,-1.261  
3,16.312,rs4684476,-1.242  
3,16.334,rs1114430,-1.229  
3,16.433,rs4143244,-1.206  
3,16.519,rs7635144,-1.246  
3,16.570,rs10510305,-1.226  
3,16.652,rs17042584,-1.214  
3,16.739,rs2686534,-1.209  
3,16.781,rs9311542,-1.217  
3,16.838,rs17749328,-1.208  
3,16.908,rs7633722,-1.196  
3,16.975,rs6771379,-1.242  
3,17.168,rs9284892,-1.272  
3,17.266,rs9311613,-1.303  
3,17.394,rs9311642,-1.324  
3,17.405,rs1452713,-1.324  
3,17.457,rs2444218,-1.319  
3,17.465,rs721213,-1.353  
3,17.471,rs1836577,-1.371  
3,17.537,rs11711086,-1.371  
3,17.631,rs717187,-1.227  
3,17.685,rs977905,-1.200  
3,17.699,rs7624621,-1.191  
3,17.717,rs4685993,-1.180  
3,17.750,rs2572683,-1.177  
3,17.897,rs9810413,-1.162  
3,18.068,rs9835716,-1.106  
3,18.215,rs1914413,-0.973  
3,18.273,rs908603,-1.018  
3,18.315,rs868243,-0.995  
3,18.358,rs7625359,-0.993  
3,18.365,rs17288023,-0.991  
3,18.390,rs7614027,-0.991  
3,18.562,rs1398788,-0.974  
3,18.592,rs1394156,-0.956  
3,18.622,rs6790803,-1.078  
3,18.845,rs7625439,-1.040  
3,18.850,rs3967024,-1.039  
3,19.049,rs9879475,-0.916  
3,19.059,rs4686053,-0.916  
3,19.080,rs474423,-0.852  
3,19.144,rs9855624,-0.856  
3,19.300,rs352747,-0.848  
3,19.376,rs4686076,-0.848  
3,19.488,rs12491369,-0.793  
3,19.496,rs7645283,-0.797  
3,19.538,rs12635360,-0.843  
3,19.548,rs163541,-0.818  
3,19.563,rs6808904,-0.770  
3,19.572,rs1400286,-0.772  
3,19.610,rs7651971,-0.779  
3,19.658,rs6773334,-0.818  
3,19.667,rs17046239,-0.816  
3,19.682,rs339805,-0.812



3,19.770,rs9859343,-0.829  
3,19.771,rs9311966,-0.830  
3,19.813,rs339022,-0.865  
3,19.835,rs17046415,-0.860  
3,19.899,rs1516570,-0.825  
3,19.901,rs478250,-0.820  
3,19.916,rs781393,-0.814  
3,19.920,rs6796324,-0.811  
3,19.922,rs1154352,-0.862  
3,19.936,rs781388,-0.935  
3,19.955,rs670764,-0.954  
3,19.989,rs2014195,-0.996  
3,20.064,rs1021687,-0.969  
3,20.201,rs9848973,-1.011  
3,20.349,rs17031847,-0.991  
3,20.564,rs13070476,-0.917  
3,20.805,rs984123,-0.937  
3,20.858,rs17652614,-0.941  
3,20.908,rs7617297,-0.949  
3,20.972,rs10510366,-0.953  
3,20.982,rs9883258,-0.952  
3,20.999,rs13064153,-0.942  
3,21.167,rs13096022,-0.838  
3,21.221,rs7623046,-0.838  
3,21.223,rs779710,-0.841  
3,21.268,rs7374553,-0.927  
3,21.398,rs779746,-0.965  
3,21.464,rs1485179,-0.983  
3,21.509,rs1485175,-0.980  
3,21.563,rs3804880,-0.977  
3,21.656,rs3864067,-0.988  
3,21.834,rs10510371,-1.010  
3,21.856,rs332936,-1.010  
3,21.881,rs329037,-1.009  
3,21.971,rs161885,-1.008  
3,22.054,rs11131090,-0.865  
3,22.094,rs11706770,-0.854  
3,22.247,rs326414,-0.729  
3,22.381,rs17048334,-0.711  
3,22.467,rs9850126,-0.698  
3,22.475,rs1385437,-0.695  
3,22.479,rs6764556,-0.742  
3,22.495,rs6785352,-0.731  
3,22.573,rs6793461,-0.707  
3,22.619,rs9835263,-0.697  
3,22.705,rs516334,-0.678  
3,22.842,rs500956,-0.705  
3,22.844,rs472126,-0.705  
3,22.889,rs6779176,-0.712  
3,23.033,rs463659,-0.712  
3,23.099,rs6443171,-0.700  
3,23.194,rs6799128,-0.764  
3,23.208,rs1979582,-0.758  
3,23.221,rs9312013,-0.727  
3,23.277,rs1905772,-0.589  
3,23.285,rs1385469,-0.587  
3,23.328,rs359045,-0.554  
3,23.358,rs6798206,-0.546  
3,23.399,rs358977,-0.537  
3,23.411,rs6777857,-0.534  
3,23.415,rs10510390,-0.534

3,23.727,rs1876611,-0.573  
3,23.840,rs956377,-0.582  
3,23.994,rs9878578,-0.457  
3,24.001,rs355090,-0.453  
3,24.012,rs10510393,-0.469  
3,24.019,rs873227,-0.480  
3,24.134,rs355057,-0.428  
3,24.176,rs11710750,-0.406  
3,24.185,rs11131140,-0.392  
3,24.210,rs11131141,-0.368  
3,24.242,rs164956,-0.303  
3,24.322,rs6785267,-0.278  
3,24.584,rs241055,-0.262  
3,24.627,rs164459,-0.248  
3,24.682,rs7634632,-0.230  
3,24.808,rs237866,-0.172  
3,24.816,rs2072582,-0.171  
3,24.861,rs237875,-0.170  
3,24.954,rs237887,-0.152  
3,24.954,rs237888,-0.152  
3,25.041,rs2301261,-0.144  
3,25.127,rs237852,-0.139  
3,25.339,rs12632905,-0.131  
3,25.498,rs398518,-0.125  
3,25.582,rs7641235,-0.124  
3,25.710,rs341791,-0.122  
3,25.839,rs2662089,-0.118  
3,25.858,rs1513315,-0.119  
3,25.875,rs9875468,-0.119  
3,25.879,rs17049971,-0.120  
3,25.886,rs1162326,-0.122  
3,25.918,rs2662090,-0.106  
3,25.920,rs7609881,-0.105  
3,25.966,rs7632256,-0.090  
3,25.977,rs1162395,-0.106  
3,25.988,rs6793348,-0.107  
3,26.121,rs422552,-0.107  
3,26.215,rs2257056,-0.151  
3,26.284,rs986119,-0.189  
3,26.307,rs400052,-0.198  
3,26.340,rs1154386,-0.240  
3,26.406,rs441300,-0.276  
3,26.406,rs9819189,-0.276  
3,26.483,rs938116,-0.287  
3,26.533,rs2648521,-0.261  
3,26.556,rs9861610,-0.249  
3,26.559,rs10222369,-0.251  
3,26.610,rs2600192,-0.269  
3,26.613,rs17050210,-0.271  
3,26.640,rs12631463,-0.270  
3,26.696,rs11707847,-0.278  
3,26.705,rs3852050,-0.279  
3,26.711,rs4686342,-0.280  
3,26.736,rs2648549,-0.282  
3,26.975,rs9818611,-0.341  
3,27.056,rs2633789,-0.346  
3,27.208,rs787837,-0.358  
3,27.219,rs159147,-0.329  
3,27.260,rs293779,-0.368  
3,27.273,rs159146,-0.378  
3,27.412,rs9878419,-0.356

3,27.519,rs455863,-0.320  
3,27.774,rs3172417,-0.268  
3,27.845,rs1642739,-0.226  
3,27.869,rs708030,-0.192  
3,27.873,rs2619508,-0.192  
3,27.921,rs11465886,-0.200  
3,28.145,rs26796,-0.239  
3,28.262,rs34870,-0.250  
3,28.275,rs7644022,-0.252  
3,28.291,rs34881,-0.260  
3,28.295,rs34892,-0.315  
3,28.300,rs808933,-0.389  
3,28.300,rs17032981,-0.388  
3,28.303,rs17033198,-0.397  
3,28.309,rs12487529,-0.415  
3,28.336,rs4684731,-0.421  
3,28.343,rs1000772,-0.422  
3,28.352,rs11707497,-0.422  
3,28.575,rs2596834,-0.452  
3,28.594,rs12632152,-0.453  
3,28.596,rs1905752,-0.453  
3,28.766,rs1960131,-0.491  
3,28.796,rs901033,-0.501  
3,28.803,rs2581215,-0.503  
3,28.808,rs2581207,-0.510  
3,28.850,rs2697152,-0.553  
3,28.854,rs4610207,-0.546  
3,28.871,rs1881363,-0.511  
3,28.887,rs2930149,-0.471  
3,28.911,rs2601126,-0.435  
3,28.926,rs1710892,-0.416  
3,28.948,rs2928078,-0.454  
3,28.968,rs2272403,-0.468  
3,28.979,rs1062246,-0.492  
3,29.106,rs6810358,-0.506  
3,29.166,rs6796787,-0.514  
3,29.193,rs7619408,-0.520  
3,29.219,rs7639145,-0.525  
3,29.250,rs430353,-0.493  
3,30.006,rs7617620,-0.490  
3,30.071,rs12632852,-0.512  
3,30.171,rs17034817,-0.534  
3,30.174,rs6770931,-0.535  
3,30.176,rs9871522,-0.535  
3,30.179,rs2574711,-0.535  
3,30.186,rs6782029,-0.539  
3,30.217,rs7627256,-0.552  
3,30.238,rs6786278,-0.548  
3,30.271,rs9815906,-0.533  
3,30.273,rs370234,-0.521  
3,30.279,rs9310393,-0.506  
3,30.282,rs7647310,-0.497  
3,30.295,rs301567,-0.496  
3,30.296,rs904267,-0.502  
3,30.343,rs1857961,-0.687  
3,30.356,rs440746,-0.760  
3,30.364,rs2133064,-0.762  
3,30.376,rs51578,-0.763  
3,30.391,rs9869051,-0.758  
3,30.402,rs431470,-0.754  
3,30.404,rs13083227,-0.752

3,30.414,rs9812594,-0.754  
3,30.466,rs3905902,-0.762  
3,30.614,rs11924163,-0.779  
3,30.705,rs2920500,-0.787  
3,30.765,rs12629751,-0.803  
3,30.786,rs2972162,-0.807  
3,30.833,rs1152005,-0.826  
3,30.836,rs7618046,-0.876  
3,30.841,rs9855622,-0.940  
3,30.863,rs709162,-0.966  
3,30.871,rs12495676,-0.961  
3,30.920,rs713178,-0.925  
3,30.943,rs2569997,-0.928  
3,31.054,rs428862,-0.868  
3,31.069,rs165571,-0.861  
3,31.075,rs11712537,-0.860  
3,31.084,rs4684895,-0.861  
3,31.111,rs2881979,-0.867  
3,31.112,rs380499,-0.868  
3,31.114,rs361052,-0.868  
3,31.167,rs6784345,-0.827  
3,31.204,rs413245,-0.840  
3,31.226,rs2648699,-0.827  
3,31.251,rs521573,-0.811  
3,31.283,rs636758,-0.794  
3,31.354,rs165435,-0.777  
3,31.361,rs358374,-0.779  
3,31.375,rs11719364,-0.789  
3,31.461,rs242519,-0.797  
3,31.520,rs6809771,-0.876  
3,31.548,rs4684126,-0.910  
3,31.579,rs6442363,-0.888  
3,32.069,rs12636440,-0.810  
3,32.071,rs17038211,-0.810  
3,32.093,rs2597515,-0.813  
3,32.163,rs2630441,-0.829  
3,32.173,rs2731343,-0.826  
3,32.218,rs17178474,-0.797  
3,32.251,rs10865714,-0.802  
3,32.342,rs1878173,-0.838  
3,32.379,rs4596126,-0.818  
3,32.415,rs9838270,-0.704  
3,32.420,rs1061375,-0.690  
3,32.420,rs7610284,-0.688  
3,32.425,rs2974384,-0.659  
3,32.428,rs729639,-0.658  
3,32.429,rs4685026,-0.640  
3,32.430,rs3762725,-0.609  
3,32.804,rs17038868,-0.450  
3,32.974,rs1350344,-0.374  
3,33.039,rs4428160,-0.362  
3,33.106,rs1871856,-0.333  
3,33.112,rs2128163,-0.335  
3,33.161,rs1482038,-0.300  
3,33.230,rs6442441,-0.300  
3,33.276,rs12497942,-0.316  
3,33.311,rs1550161,-0.327  
3,33.316,rs2118105,-0.318  
3,33.321,rs1865884,-0.348  
3,33.338,rs10446439,-0.362  
3,33.348,rs1038300,-0.377

3,33.391,rs7647134,-0.450  
3,33.408,rs12638941,-0.447  
3,33.425,rs748098,-0.483  
3,33.427,rs4684217,-0.486  
3,33.441,rs9683047,-0.497  
3,33.448,rs7628386,-0.501  
3,33.487,rs6763180,-0.522  
3,33.497,rs3773172,-0.532  
3,33.523,rs1062540,-0.560  
3,33.524,rs2327896,-0.560  
3,33.526,rs2341985,-0.559  
3,33.531,rs6794801,-0.555  
3,33.565,rs9878341,-0.507  
3,33.587,rs7645232,-0.503  
3,33.622,rs13062253,-0.497  
3,33.660,rs7647806,-0.491  
3,33.709,rs4685199,-0.467  
3,33.720,rs7615913,-0.495  
3,33.727,rs12631299,-0.506  
3,33.750,rs12495033,-0.540  
3,33.761,rs4583633,-0.507  
3,33.768,rs4685204,-0.506  
3,33.820,rs17040011,-0.503  
3,33.823,rs13091225,-0.502  
3,33.869,rs17320277,-0.434  
3,33.948,rs7636830,-0.386  
3,33.980,rs2568848,-0.388  
3,34.021,rs903056,-0.401  
3,34.031,rs829182,-0.424  
3,34.034,rs864361,-0.431  
3,34.035,rs3899614,-0.433  
3,34.043,rs9828560,-0.455  
3,34.084,rs9875241,-0.460  
3,34.105,rs6442478,-0.454  
3,34.118,rs10510432,-0.447  
3,34.156,rs1389300,-0.443  
3,34.252,rs293908,-0.426  
3,34.294,rs4685234,-0.391  
3,34.301,rs12491077,-0.391  
3,34.444,rs2164358,-0.416  
3,34.463,rs12489827,-0.418  
3,34.486,rs17477815,-0.415  
3,34.615,rs11712564,-0.394  
3,34.640,rs7625117,-0.393  
3,34.775,rs826428,-0.373  
3,34.883,rs9813606,-0.354  
3,34.884,rs2291853,-0.354  
3,34.913,rs851848,-0.380  
3,34.953,rs6442511,-0.371  
3,35.008,rs3773464,-0.347  
3,35.146,rs13075694,-0.393  
3,35.538,rs9880034,-0.424  
3,35.651,rs2470549,-0.432  
3,36.046,rs9815997,-0.394  
3,36.076,rs897204,-0.407  
3,36.082,rs6442577,-0.410  
3,36.122,rs4234534,-0.382  
3,36.135,rs4423748,-0.377  
3,36.148,rs4078148,-0.372  
3,36.168,rs13079803,-0.364  
3,36.228,rs17041971,-0.363

3,36.277,rs6442586,-0.362  
3,36.304,rs842280,-0.346  
3,36.311,rs9848911,-0.342  
3,36.403,rs842274,-0.305  
3,36.501,rs1060699,-0.298  
3,36.540,rs689953,-0.287  
3,36.620,rs12486361,-0.315  
3,36.629,rs7632675,-0.316  
3,36.651,rs4685337,-0.320  
3,36.694,rs11710881,-0.320  
3,36.828,rs2881514,-0.338  
3,37.010,rs10510453,-0.407  
3,37.097,rs7623201,-0.411  
3,37.125,rs7647846,-0.409  
3,37.292,rs7636863,-0.394  
3,37.419,rs4685385,-0.396  
3,37.631,rs6762816,-0.407  
3,37.657,rs11549705,-0.408  
3,37.680,rs4077616,-0.373  
3,37.683,rs4072191,-0.371  
3,37.688,rs6778609,-0.375  
3,37.702,rs4685442,-0.383  
3,37.749,rs1463219,-0.412  
3,38.068,rs9862290,-0.408  
3,38.286,rs7646613,-0.369  
3,38.295,rs7620376,-0.368  
3,38.330,rs9861146,-0.364  
3,38.581,rs7653460,-0.335  
3,38.629,rs11921478,-0.318  
3,38.693,rs9310549,-0.287  
3,38.700,rs9841621,-0.283  
3,38.716,rs11128887,-0.279  
3,38.793,rs1328542,-0.260  
3,38.809,rs714141,-0.256  
3,38.945,rs6785093,-0.197  
3,38.950,rs336629,-0.263  
3,39.205,rs4370047,-0.195  
3,39.256,rs9817260,-0.171  
3,39.292,rs9881034,-0.154  
3,39.333,rs6792900,-0.173  
3,39.358,rs4533671,-0.141  
3,39.359,rs4401379,-0.140  
3,39.361,rs11717739,-0.137  
3,39.397,rs7428879,-0.129  
3,39.499,rs4408886,-0.123  
3,39.500,rs4973721,-0.123  
3,39.590,rs4101508,-0.113  
3,39.604,rs6773955,-0.113  
3,39.836,rs17005800,-0.100  
3,39.877,rs4264750,-0.097  
3,39.965,rs7645658,-0.091  
3,40.000,rs10470605,-0.088  
3,40.202,rs7628760,-0.075  
3,40.312,rs6804427,-0.068  
3,40.443,rs17006228,-0.100  
3,40.508,rs1506097,-0.090  
3,40.767,rs4103004,-0.104  
3,40.828,rs6808352,-0.103  
3,40.918,rs7617840,-0.097  
3,40.943,rs11917197,-0.097  
3,40.945,rs17006645,-0.097

3,41.150,rs6801666,-0.104  
3,41.204,rs11719694,-0.083  
3,41.237,rs9854943,-0.083  
3,41.420,rs661669,-0.086  
3,41.435,rs1403651,-0.085  
3,41.608,rs9841080,-0.071  
3,41.634,rs17007409,-0.089  
3,41.655,rs12491632,-0.078  
3,41.664,rs9839849,-0.074  
3,41.683,rs17810229,-0.073  
3,41.713,rs4857969,-0.070  
3,41.723,rs7630411,-0.069  
3,41.909,rs1498994,-0.033  
3,41.953,rs1587379,-0.033  
3,42.063,rs17008011,-0.018  
3,42.070,rs958635,-0.017  
3,42.089,rs10510510,-0.017  
3,42.334,rs13074521,-0.019  
3,42.432,rs2661406,-0.009  
3,42.436,rs13059346,-0.009  
3,42.499,rs1395991,-0.009  
3,42.556,rs376703,-0.009  
3,42.570,rs341844,-0.009  
3,42.601,rs424842,-0.009  
3,42.610,rs800621,-0.008  
3,42.619,rs1026687,-0.008  
3,42.621,rs163471,-0.008  
3,42.635,rs6800260,-0.008  
3,42.641,rs2194607,-0.007  
3,42.642,rs167936,-0.013  
3,42.671,rs920118,-0.014  
3,42.768,rs1841914,-0.014  
3,42.784,rs1382167,-0.008  
3,42.785,rs6776046,-0.008  
3,42.802,rs1824212,-0.013  
3,42.827,rs3860583,-0.014  
3,42.890,rs10510515,-0.016  
3,42.929,rs9858811,-0.017  
3,42.930,rs957589,-0.017  
3,42.936,rs12106696,-0.019  
3,42.969,rs7428718,-0.030  
3,42.972,rs7626282,-0.022  
3,42.973,rs17009440,-0.022  
3,42.974,rs6798573,-0.022  
3,43.002,rs4858017,-0.028  
3,43.041,rs9850363,-0.027  
3,43.044,rs11129023,-0.027  
3,43.057,rs4858021,-0.029  
3,43.073,rs2670259,-0.039  
3,43.077,rs2670256,-0.039  
3,43.108,rs2630807,-0.046  
3,43.109,rs17009807,-0.046  
3,43.131,rs9310662,-0.046  
3,43.380,rs259556,-0.051  
3,43.396,rs1479992,-0.052  
3,43.403,rs17583756,-0.052  
3,43.415,rs1679256,-0.047  
3,43.419,rs259435,-0.046  
3,43.422,rs11914361,-0.049  
3,43.438,rs2170091,-0.075  
3,43.446,rs6793553,-0.092

3,43.450,rs1527637,-0.095  
3,43.472,rs2728981,-0.155  
3,43.499,rs9809134,-0.208  
3,43.501,rs1389663,-0.211  
3,43.502,rs1494223,-0.212  
3,43.518,rs6419844,-0.235  
3,43.569,rs2122369,-0.285  
3,43.622,rs9824112,-0.277  
3,43.635,rs12633771,-0.278  
3,43.657,rs1870480,-0.277  
3,43.660,rs1349282,-0.276  
3,43.719,rs2358930,-0.252  
3,43.749,rs1471234,-0.254  
3,43.813,rs33117,-0.268  
3,43.953,rs1606478,-0.286  
3,44.057,rs680110,-0.275  
3,44.130,rs1817582,-0.279  
3,44.196,rs9826441,-0.282  
3,44.327,rs7374735,-0.296  
3,44.769,rs13062101,-0.285  
3,45.020,rs6787720,-0.321  
3,45.064,rs7639174,-0.303  
3,45.093,rs4072410,-0.387  
3,45.104,rs4858524,-0.403  
3,45.121,rs6807584,-0.411  
3,45.163,rs7633774,-0.427  
3,45.165,rs9883225,-0.427  
3,45.180,rs17702569,-0.427  
3,45.180,rs6550783,-0.427  
3,45.190,rs1037633,-0.432  
3,45.252,rs6774017,-0.458  
3,45.270,rs17754530,-0.465  
3,45.308,rs9861357,-0.465  
3,45.669,rs951015,-0.398  
3,45.728,rs11927256,-0.392  
3,45.918,rs2683530,-0.382  
3,45.935,rs12496664,-0.381  
3,45.994,rs13097208,-0.381  
3,46.005,rs826223,-0.381  
3,46.006,rs12491199,-0.380  
3,46.016,rs4858110,-0.380  
3,46.020,rs986575,-0.380  
3,46.021,rs17014454,-0.379  
3,46.033,rs9840296,-0.371  
3,46.069,rs826232,-0.348  
3,46.120,rs2167115,-0.336  
3,46.147,rs7610039,-0.329  
3,46.169,rs9812034,-0.286  
3,46.199,rs9809320,-0.298  
3,46.217,rs1354601,-0.286  
3,46.231,rs6550859,-0.283  
3,46.236,rs11919155,-0.282  
3,46.251,rs9852824,-0.282  
3,46.336,rs5014281,-0.270  
3,46.347,rs9831450,-0.262  
3,46.398,rs9845983,-0.221  
3,46.405,rs6792725,-0.221  
3,46.427,rs892940,-0.212  
3,46.461,rs9850443,-0.225  
3,46.507,rs7632924,-0.205  
3,46.567,rs9812637,-0.181



3,46.601,rs9862855,-0.137  
3,46.611,rs4858125,-0.127  
3,46.644,rs13088027,-0.110  
3,46.679,rs6802797,-0.103  
3,46.680,rs6550908,-0.103  
3,46.689,rs7623169,-0.100  
3,46.720,rs1994908,-0.091  
3,46.840,rs2885598,-0.074  
3,46.852,rs11711279,-0.072  
3,46.906,rs2363520,-0.065  
3,47.083,rs6780762,-0.083  
3,47.149,rs4502548,-0.080  
3,47.305,rs1021701,-0.074  
3,47.340,rs1604003,-0.073  
3,47.603,rs17516267,-0.093  
3,47.655,rs1909526,-0.097  
3,48.008,rs9809773,-0.104  
3,48.066,rs10510564,-0.106  
3,48.184,rs11921615,-0.109  
3,48.213,rs755661,-0.113  
3,48.226,rs9284857,-0.112  
3,48.227,rs6800566,-0.112  
3,48.242,rs4681063,-0.107  
3,48.252,rs13314219,-0.126  
3,48.289,rs13087022,-0.132  
3,48.314,rs1286648,-0.136  
3,48.319,rs1286646,-0.135  
3,48.338,rs1286769,-0.132  
3,48.348,rs17526839,-0.118  
3,48.352,rs1286733,-0.112  
3,48.360,rs6782425,-0.102  
3,48.373,rs1001647,-0.103  
3,48.456,rs9877259,-0.117  
3,48.513,rs2968169,-0.139  
3,48.575,rs10470654,-0.127  
3,48.755,rs1160717,-0.131  
3,48.898,rs7642228,-0.137  
3,48.904,rs1352718,-0.131  
3,48.943,rs9851900,-0.147  
3,48.968,rs13065275,-0.147  
3,49.066,rs7652856,-0.162  
3,49.126,rs6788033,-0.170  
3,49.243,rs6792668,-0.180  
3,49.296,rs12635000,-0.205  
3,49.392,rs1466957,-0.171  
3,49.460,rs1374798,-0.187  
3,49.465,rs2044573,-0.166  
3,49.466,rs4973842,-0.167  
3,49.924,rs4973768,-0.285  
3,50.086,rs629462,-0.288  
3,50.120,rs12485763,-0.284  
3,50.129,rs7429875,-0.284  
3,50.186,rs9855458,-0.303  
3,50.215,rs6762388,-0.314  
3,50.282,rs6764447,-0.330  
3,50.333,rs3806624,-0.351  
3,50.396,rs6770919,-0.393  
3,50.434,rs2371121,-0.413  
3,50.511,rs11708641,-0.414  
3,50.576,rs2253562,-0.419  
3,50.578,rs12636813,-0.419

3, 50.705, rs2199654, -0.439  
3, 50.717, rs2063034, -0.404  
3, 50.723, rs9825129, -0.410  
3, 50.752, rs433317, -0.436  
3, 50.815, rs6765138, -0.482  
3, 50.984, rs925527, -0.462  
3, 51.117, rs6800659, -0.453  
3, 51.243, rs7641491, -0.448  
3, 51.824, rs9830706, -0.395  
3, 51.860, rs1461803, -0.390  
3, 51.897, rs17651822, -0.393  
3, 51.975, rs6802374, -0.397  
3, 52.051, rs12634756, -0.402  
3, 52.076, rs7617605, -0.401  
3, 52.085, rs7633531, -0.399  
3, 52.169, rs9821969, -0.377  
3, 52.172, rs6767753, -0.377  
3, 52.272, rs9816337, -0.354  
3, 52.370, rs6765943, -0.352  
3, 52.537, rs6796246, -0.303  
3, 52.613, rs634868, -0.365  
3, 52.633, rs546270, -0.384  
3, 52.732, rs2102801, -0.304  
3, 52.752, rs12492761, -0.310  
3, 52.761, rs6780332, -0.348  
3, 52.814, rs1517150, -0.368  
3, 52.897, rs7622721, -0.303  
3, 52.913, rs987693, -0.284  
3, 52.924, rs9812101, -0.262  
3, 52.964, rs1020043, -0.202  
3, 52.981, rs9865738, -0.194  
3, 52.988, rs17023226, -0.190  
3, 53.002, rs6549924, -0.183  
3, 53.029, rs6777437, -0.172  
3, 53.038, rs6773182, -0.172  
3, 53.067, rs7427457, -0.146  
3, 53.111, rs4574243, -0.136  
3, 53.128, rs4389439, -0.137  
3, 53.178, rs9310898, -0.147  
3, 53.183, rs17023466, -0.149  
3, 53.191, rs2053288, -0.151  
3, 53.246, rs9861677, -0.186  
3, 53.377, rs35911, -0.181  
3, 53.537, rs9829357, -0.145  
3, 53.603, rs2888127, -0.140  
3, 53.611, rs9865546, -0.139  
3, 53.615, rs7622316, -0.140  
3, 53.772, rs3773108, -0.184  
3, 53.801, rs2371816, -0.211  
3, 53.888, rs9837143, -0.195  
3, 53.903, rs10446455, -0.191  
3, 53.930, rs7633961, -0.236  
3, 53.957, rs4680733, -0.235  
3, 54.016, rs1449292, -0.234  
3, 54.078, rs17024608, -0.211  
3, 54.084, rs6776043, -0.209  
3, 54.105, rs1868488, -0.195  
3, 54.115, rs6798671, -0.189  
3, 54.182, rs11717088, -0.170  
3, 54.548, rs6791084, -0.105  
3, 54.658, rs4680877, -0.091

3,54.687,rs2371997,-0.096  
3,54.725,rs1433989,-0.094  
3,54.764,rs6549977,-0.092  
3,54.854,rs6549980,-0.056  
3,54.944,rs7634533,-0.019  
3,54.981,rs11129399,-0.011  
3,55.060,rs1495589,-0.010  
3,55.196,rs11917602,-0.025  
3,55.242,rs4305453,-0.042  
3,55.259,rs9822117,-0.045  
3,55.298,rs973404,-0.049  
3,55.395,rs1835538,-0.047  
3,55.419,rs4522809,-0.064  
3,55.429,rs12490899,-0.066  
3,55.483,rs6792117,-0.066  
3,55.507,rs3773651,-0.075  
3,55.514,rs1346907,-0.078  
3,55.674,rs1393752,-0.085  
3,55.726,rs6783336,-0.088  
3,55.745,rs1494738,-0.090  
3,55.963,rs1876168,-0.090  
3,56.003,rs294314,-0.093  
3,56.198,rs17643248,-0.123  
3,56.243,rs4515095,-0.139  
3,56.296,rs4955188,-0.154  
3,56.306,rs4317137,-0.157  
3,56.324,rs9852655,-0.160  
3,56.453,rs1006965,-0.177  
3,56.511,rs17027548,-0.184  
3,56.596,rs882648,-0.198  
3,56.660,rs7639313,-0.207  
3,56.913,rs3792551,-0.150  
3,56.940,rs2278960,-0.124  
3,56.941,rs1902334,-0.124  
3,56.941,rs6785222,-0.081  
3,56.995,rs7613225,-0.116  
3,57.040,rs1902341,-0.148  
3,57.102,rs7653447,-0.144  
3,57.128,rs13087711,-0.093  
3,57.200,rs4452359,-0.042  
3,57.226,rs4478116,-0.027  
3,57.275,rs4444747,-0.009  
3,57.357,rs12485651,-0.010  
3,57.509,rs4955238,-0.011  
3,57.651,rs7644491,-0.012  
3,57.665,rs11720070,-0.006  
3,57.666,rs4440157,-0.005  
3,57.679,rs4078487,-0.001  
3,57.679,rs11713777,-0.001  
3,57.688,rs7616055,-0.000  
3,57.700,rs6800446,-0.000  
3,57.761,rs13314943,-0.001  
3,57.786,rs7644602,-0.003  
3,57.805,rs11914777,-0.005  
3,57.840,rs11129515,-0.015  
3,57.840,rs2053280,-0.015  
3,57.861,rs7623462,-0.017  
3,57.879,rs6782595,-0.013  
3,57.898,rs17279970,-0.009  
3,57.920,rs3867381,-0.012  
3,57.932,rs11924535,-0.015

3,57.977,rs614004,-0.018  
3,57.988,rs17029445,-0.018  
3,58.057,rs369751,-0.018  
3,58.139,rs6782149,-0.010  
3,58.331,rs6550146,-0.007  
3,58.567,rs6809722,-0.008  
3,58.606,rs4909018,-0.012  
3,58.627,rs6550169,-0.011  
3,58.745,rs6770096,-0.017  
3,58.752,rs9867387,-0.017  
3,58.772,rs13314993,-0.018  
3,58.793,rs6793913,-0.019  
3,58.928,rs11707667,-0.008  
3,59.067,rs4384906,-0.008  
3,59.071,rs4678772,-0.008  
3,59.078,rs4455284,-0.002  
3,59.141,rs11928797,-0.001  
3,59.170,rs1532590,-0.000  
3,59.210,rs9817221,-0.000  
3,59.448,rs9843488,0.002  
3,59.449,rs13081248,0.002  
3,59.618,rs9848859,0.003  
3,59.632,rs11916425,0.001  
3,59.641,rs6776985,0.001  
3,59.664,rs4678623,0.000  
3,59.736,rs12494973,0.000  
3,59.750,rs4076661,0.000  
3,59.804,rs9813805,0.000  
3,59.825,rs1899082,0.000  
3,59.866,rs11927965,-0.000  
3,59.891,rs9859996,-0.001  
3,60.046,rs1852808,-0.004  
3,60.050,rs17201571,-0.004  
3,60.108,rs9875943,-0.004  
3,60.141,rs7649251,-0.004  
3,60.240,rs564190,-0.003  
3,60.332,rs4678492,-0.003  
3,60.388,rs2035257,-0.003  
3,60.395,rs9990367,-0.004  
3,60.461,rs11129640,-0.009  
3,60.533,rs6788583,-0.016  
3,60.564,rs1376021,-0.025  
3,60.683,rs814487,-0.025  
3,60.701,rs17033173,-0.026  
3,60.702,rs12631043,-0.026  
3,60.761,rs13069451,-0.026  
3,60.777,rs10510663,-0.026  
3,60.888,rs9859804,-0.023  
3,61.004,rs9854002,-0.017  
3,61.073,rs7615307,-0.013  
3,61.108,rs1488092,-0.014  
3,61.131,rs6788290,-0.013  
3,61.215,rs4678837,-0.016  
3,61.271,rs7621380,-0.011  
3,61.397,rs7647352,-0.003  
3,61.463,rs1479151,-0.002  
3,61.531,rs10510683,-0.002  
3,61.944,rs1598529,-0.007  
3,61.958,rs7610107,-0.005  
3,61.960,rs870445,-0.005  
3,62.007,rs6787386,-0.009

3,62.016,rs7645818,-0.010  
3,62.219,rs950146,-0.006  
3,62.294,rs1507881,-0.006  
3,62.312,rs7625360,-0.005  
3,62.359,rs2135951,-0.006  
3,62.381,rs7620657,-0.007  
3,62.462,rs1553656,-0.009  
3,62.465,rs1507882,-0.004  
3,62.730,rs6773378,-0.006  
3,62.776,rs17036373,-0.005  
3,62.782,rs267527,-0.003  
3,62.788,rs6550478,-0.002  
3,62.813,rs267569,-0.002  
3,62.834,rs2844363,-0.003  
3,62.908,rs7373528,0.000  
3,62.941,rs2685100,0.000  
3,62.943,rs2685093,0.000  
3,62.953,rs11129771,-0.000  
3,62.969,rs6796546,-0.000  
3,63.076,rs6599099,-0.001  
3,63.141,rs7744,-0.000  
3,63.216,rs2298419,0.000  
3,63.231,rs818818,0.000  
3,63.238,rs171248,0.001  
3,63.391,rs1002675,-0.000  
3,63.416,rs12636358,-0.000  
3,63.581,rs503327,-0.000  
3,63.639,rs11706270,-0.000  
3,63.844,rs7374540,0.002  
3,63.866,rs7427874,0.000  
3,63.897,rs6797133,0.000  
3,63.910,rs9832895,0.000  
3,63.914,rs6599228,0.000  
3,63.937,rs6599229,0.000  
3,63.953,rs13073578,0.000  
3,64.020,rs13061927,0.000  
3,64.069,rs7374633,0.000  
3,64.096,rs6599240,0.000  
3,64.245,rs9637536,0.000  
3,64.253,rs7635221,-0.000  
3,64.322,rs9815891,-0.000  
3,64.348,rs11717455,-0.000  
3,64.350,rs11922345,-0.000  
3,64.379,rs2271487,-0.000  
3,64.388,rs4676483,-0.000  
3,64.398,rs3938106,-0.001  
3,64.424,rs4676617,-0.001  
3,64.446,rs11129819,-0.001  
3,64.522,rs630934,-0.000  
3,64.535,rs946411,-0.000  
3,64.539,rs562545,-0.000  
3,64.588,rs13091037,-0.003  
3,64.618,rs9832461,-0.009  
3,64.634,rs2091370,-0.011  
3,64.653,rs9842160,-0.014  
3,64.676,rs7617131,-0.011  
3,64.704,rs1598997,-0.005  
3,64.722,rs9851674,-0.003  
3,64.781,rs2679807,-0.000  
3,64.808,rs2679822,-0.000  
3,64.930,rs4974035,-0.000

3,64.933,rs6762428,-0.000  
3,64.990,rs9875272,-0.000  
3,65.108,rs627998,-0.000  
3,65.121,rs7650433,-0.000  
3,65.122,rs6807519,-0.000  
3,65.231,rs3828363,-0.005  
3,65.245,rs4276160,-0.005  
3,65.257,rs6599132,-0.005  
3,65.275,rs6802872,-0.005  
3,65.335,rs431867,-0.006  
3,65.557,rs3912577,-0.008  
3,65.683,rs7627972,-0.009  
3,65.806,rs3897976,-0.012  
3,65.817,rs1691986,-0.012  
3,66.051,rs900569,-0.014  
3,66.358,rs1979789,-0.013  
3,66.405,rs4682953,-0.018  
3,66.430,rs2290134,-0.022  
3,66.433,rs10865916,-0.021  
3,66.438,rs11928109,-0.021  
3,66.473,rs9311317,-0.020  
3,66.496,rs4683161,-0.020  
3,66.559,rs683887,-0.025  
3,66.650,rs33454,-0.025  
3,66.659,rs26352,-0.025  
3,66.696,rs33484,-0.010  
3,66.713,rs33491,-0.008  
3,66.760,rs2041376,-0.007  
3,66.993,rs11129965,-0.005  
3,67.063,rs342543,-0.004  
3,67.079,rs1876506,-0.005  
3,67.108,rs2267535,-0.005  
3,67.202,rs342521,-0.008  
3,67.323,rs3732860,-0.005  
3,67.335,rs1427800,-0.005  
3,67.540,rs7648947,-0.004  
3,67.566,rs2372342,-0.002  
3,67.578,rs3843370,-0.002  
3,67.601,rs9864154,-0.002  
3,67.701,rs17406718,-0.002  
3,67.714,rs7621298,-0.003  
3,67.946,rs7614885,-0.004  
3,68.116,rs6441791,-0.011  
3,68.149,rs13100389,-0.012  
3,68.158,rs7622411,-0.011  
3,68.208,rs4073774,-0.009  
3,68.303,rs7630503,-0.011  
3,68.421,rs1404481,-0.011  
3,68.480,rs1008369,-0.004  
3,68.484,rs9881814,-0.004  
3,68.501,rs2109409,-0.007  
3,68.501,rs6800118,-0.007  
3,68.510,rs7621857,-0.015  
3,68.522,rs4234441,-0.013  
3,68.537,rs7618961,-0.015  
3,68.550,rs730004,-0.036  
3,68.588,rs9284879,-0.036  
3,68.911,rs6792918,-0.053  
3,69.052,rs9863819,-0.061  
3,69.053,rs2176804,-0.048  
3,69.055,rs6784502,-0.041

3,69.058,rs2037358,-0.029  
3,69.065,rs5007171,-0.038  
3,69.068,rs12494480,-0.026  
3,69.076,rs4682769,-0.018  
3,69.088,rs4683068,-0.012  
3,69.102,rs6767173,-0.011  
3,69.139,rs33780,-0.010  
3,69.176,rs6793847,-0.013  
3,69.190,rs854220,-0.010  
3,69.200,rs13314784,-0.008  
3,69.237,rs9825179,-0.018  
3,69.301,rs10212409,-0.026  
3,69.372,rs2673051,-0.036  
3,69.409,rs2286489,-0.028  
3,69.416,rs758386,-0.035  
3,69.418,rs2531748,-0.037  
3,69.418,rs13067466,-0.036  
3,69.423,rs2159272,-0.036  
3,69.588,rs6772051,-0.042  
3,69.589,rs2888512,-0.042  
3,69.691,rs9990343,-0.046  
3,69.812,rs6791703,-0.052  
3,69.821,rs7648827,-0.054  
3,69.825,rs1879325,-0.053  
3,69.857,rs2139637,-0.050  
3,69.869,rs1520489,-0.053  
3,69.899,rs11718902,-0.058  
3,69.909,rs9814780,-0.059  
3,69.924,rs6801459,-0.062  
3,70.028,rs4683295,-0.071  
3,70.037,rs2385870,-0.072  
3,70.105,rs4078466,-0.079  
3,70.364,rs3732530,-0.109  
3,70.519,rs17729010,-0.142  
3,70.558,rs11130161,-0.152  
3,70.569,rs6779517,-0.154  
3,70.572,rs2362452,-0.154  
3,70.594,rs3895736,-0.148  
3,70.643,rs4955418,-0.138  
3,70.838,rs4625,-0.138  
3,70.935,rs7620081,-0.141  
3,70.942,rs6773188,-0.142  
3,70.996,rs4234645,-0.169  
3,71.072,rs9873175,-0.196  
3,71.096,rs17259762,-0.201  
3,71.354,rs1011063,-0.185  
3,71.534,rs1108842,-0.172  
3,71.691,rs13089851,-0.168  
3,71.825,rs9847710,-0.164  
3,71.873,rs2253685,-0.158  
3,72.149,rs674628,-0.108  
3,72.191,rs555480,-0.102  
3,72.234,rs312487,-0.105  
3,72.243,rs979220,-0.104  
3,72.257,rs13078747,-0.076  
3,72.280,rs17053186,-0.051  
3,72.293,rs807193,-0.062  
3,72.295,rs9311507,-0.063  
3,72.339,rs6786135,-0.049  
3,72.378,rs2680672,-0.048  
3,72.385,rs1380608,-0.048

3,72.394,rs9830632,-0.046  
3,72.414,rs7638857,-0.036  
3,72.443,rs3796347,-0.030  
3,72.449,rs1109959,-0.028  
3,72.500,rs9835128,-0.023  
3,72.513,rs6801605,-0.024  
3,72.533,rs6798958,-0.025  
3,72.542,rs893367,-0.025  
3,72.578,rs6798193,-0.026  
3,72.606,rs13064140,-0.026  
3,72.616,rs4582049,-0.026  
3,72.892,rs2029119,-0.010  
3,72.892,rs2029118,-0.010  
3,72.947,rs9825725,-0.009  
3,73.081,rs9809064,-0.001  
3,73.203,rs4244706,0.000  
3,73.221,rs13073263,0.001  
3,73.225,rs4928016,0.002  
3,73.241,rs4928020,0.003  
3,73.319,rs11130409,0.002  
3,73.361,rs7619590,0.003  
3,73.426,rs7427716,0.003  
3,73.514,rs9818348,0.003  
3,73.535,rs11711956,0.004  
3,73.539,rs9811393,0.001  
3,73.838,rs9654001,0.009  
3,73.839,rs6789236,0.009  
3,73.985,rs7614229,0.016  
3,74.027,rs6783107,0.017  
3,74.173,rs7627415,0.015  
3,74.222,rs17054142,0.016  
3,74.236,rs2251788,0.017  
3,74.276,rs6782115,0.019  
3,74.336,rs1851043,0.019  
3,74.353,rs545517,0.020  
3,74.355,rs616788,0.020  
3,74.492,rs1965072,0.024  
3,74.563,rs13095178,0.025  
3,74.597,rs1997463,0.020  
3,74.604,rs13081825,0.019  
3,74.628,rs11130434,0.023  
3,74.634,rs3773605,0.024  
3,74.641,rs1075354,0.026  
3,74.644,rs4955898,0.025  
3,74.841,rs1568983,0.039  
3,75.185,rs6772996,0.050  
3,75.276,rs12487923,0.056  
3,75.282,rs17054609,0.054  
3,75.347,rs358028,0.046  
3,75.368,rs3773554,0.044  
3,75.406,rs358064,0.045  
3,75.448,rs9865871,0.047  
3,75.451,rs358007,0.047  
3,75.484,rs697929,0.048  
3,75.531,rs1388634,0.046  
3,75.629,rs716384,0.050  
3,75.668,rs9818965,0.069  
3,75.750,rs403286,0.073  
3,75.761,rs392699,0.075  
3,75.869,rs358805,0.110  
3,75.916,rs358783,0.100



3,75.930,rs358817,0.102  
3,76.139,rs1879382,0.112  
3,76.157,rs1829555,0.112  
3,76.376,rs1160047,0.098  
3,76.421,rs570374,0.105  
3,76.516,rs11716980,0.150  
3,76.589,rs1126230,0.117  
3,76.702,rs863631,0.087  
3,76.713,rs1994978,0.081  
3,76.772,rs1495371,0.051  
3,76.772,rs815444,0.051  
3,76.854,rs1874311,0.066  
3,77.055,rs2362852,0.086  
3,77.118,rs9827757,0.089  
3,77.400,rs2200432,0.099  
3,77.500,rs6780890,0.085  
3,77.522,rs7646054,0.082  
3,77.559,rs12635549,0.080  
3,77.567,rs1392702,0.080  
3,77.584,rs12638861,0.087  
3,77.596,rs1354034,0.092  
3,77.627,rs7630830,0.086  
3,77.769,rs13070800,0.076  
3,77.780,rs6801254,0.076  
3,77.782,rs17057445,0.076  
3,77.914,rs3924042,0.065  
3,77.948,rs6784399,0.065  
3,77.986,rs11922193,0.075  
3,78.033,rs7622066,0.089  
3,78.045,rs9830791,0.093  
3,78.081,rs7612293,0.099  
3,78.173,rs12495640,0.106  
3,78.264,rs6445860,0.100  
3,78.677,rs2121743,0.085  
3,78.811,rs7646913,0.082  
3,78.819,rs4530498,0.083  
3,78.910,rs11720285,0.080  
3,78.921,rs3773008,0.083  
3,78.950,rs4681688,0.061  
3,78.950,rs9853873,0.061  
3,78.954,rs4387990,0.053  
3,78.962,rs4681869,0.034  
3,78.965,rs7652223,0.030  
3,78.966,rs13080308,0.029  
3,78.968,rs11710358,0.028  
3,78.969,rs6762192,0.028  
3,79.011,rs1373403,0.034  
3,79.085,rs4681901,0.049  
3,79.221,rs17059955,0.056  
3,79.429,rs1567728,0.055  
3,79.545,rs9880478,0.051  
3,79.632,rs2197311,0.047  
3,79.721,rs6808731,0.043  
3,79.741,rs1443941,0.044  
3,79.884,rs9850077,0.066  
3,79.917,rs962791,0.059  
3,79.979,rs6762062,0.089  
3,80.007,rs10454231,0.097  
3,80.022,rs9870523,0.099  
3,80.090,rs9840238,0.110  
3,80.093,rs734184,0.110

3,80.097,rs6791284,0.110  
3,80.228,rs6763159,0.106  
3,80.263,rs1281465,0.103  
3,80.288,rs7634315,0.101  
3,80.329,rs6766124,0.089  
3,80.383,rs1947152,0.075  
3,80.383,rs1456155,0.075  
3,80.488,rs517644,0.085  
3,80.492,rs1485718,0.085  
3,80.513,rs780354,0.088  
3,80.551,rs12634148,0.117  
3,80.583,rs6778206,0.125  
3,80.603,rs689497,0.125  
3,80.690,rs646372,0.125  
3,80.783,rs9864403,0.120  
3,80.787,rs7641743,0.119  
3,80.846,rs2366968,0.122  
3,80.872,rs3796193,0.121  
3,80.901,rs9862003,0.119  
3,81.032,rs4679627,0.102  
3,81.039,rs17061792,0.104  
3,81.064,rs6794968,0.116  
3,81.126,rs169841,0.168  
3,81.132,rs9860107,0.169  
3,81.260,rs13317306,0.194  
3,81.333,rs7623479,0.201  
3,81.347,rs5014208,0.207  
3,81.367,rs2064020,0.210  
3,81.487,rs213299,0.202  
3,81.491,rs213307,0.202  
3,81.619,rs169913,0.187  
3,81.676,rs213354,0.193  
3,81.697,rs9879860,0.203  
3,81.761,rs7644138,0.243  
3,81.763,rs4679531,0.243  
3,81.778,rs186154,0.242  
3,81.858,rs6764498,0.238  
3,81.885,rs6784469,0.238  
3,81.886,rs6773500,0.243  
3,81.886,rs965033,0.250  
3,81.890,rs6782631,0.298  
3,81.925,rs2687163,0.328  
3,81.982,rs7618479,0.365  
3,82.030,rs151743,0.435  
3,82.032,rs241693,0.402  
3,82.211,rs2197751,0.344  
3,82.275,rs2017941,0.337  
3,82.295,rs17063425,0.332  
3,82.420,rs241671,0.304  
3,82.490,rs17063532,0.278  
3,82.495,rs3937353,0.275  
3,82.531,rs6785709,0.236  
3,82.595,rs11720214,0.190  
3,82.675,rs11926787,0.179  
3,82.747,rs2856076,0.183  
3,82.847,rs12633258,0.170  
3,83.023,rs7636357,0.147  
3,83.066,rs17031633,0.156  
3,83.082,rs6783059,0.160  
3,83.086,rs3920477,0.157  
3,83.100,rs6446152,0.148

3,83.112,rs9311779,0.140  
3,83.297,rs2736736,0.122  
3,83.350,rs2594139,0.116  
3,83.578,rs6768425,0.098  
3,83.586,rs17683604,0.099  
3,83.627,rs1562525,0.107  
3,83.645,rs6414610,0.109  
3,83.652,rs6776499,0.110  
3,83.674,rs13087545,0.107  
3,83.709,rs1898749,0.102  
3,83.933,rs815710,0.092  
3,83.958,rs9812140,0.112  
3,83.967,rs6784508,0.105  
3,83.977,rs7625594,0.104  
3,83.987,rs12490142,0.102  
3,84.063,rs11130841,0.096  
3,84.088,rs1453754,0.098  
3,84.103,rs9311811,0.098  
3,84.110,rs1453758,0.098  
3,84.157,rs7616413,0.098  
3,84.209,rs938959,0.129  
3,84.217,rs7643514,0.127  
3,84.218,rs1317639,0.127  
3,84.261,rs1320234,0.121  
3,84.279,rs6807692,0.121  
3,84.282,rs13064689,0.121  
3,84.307,rs6787964,0.105  
3,84.311,rs4688268,0.089  
3,84.339,rs1915992,0.093  
3,84.387,rs7648560,0.099  
3,84.421,rs1980283,0.106  
3,84.527,rs7630364,0.107  
3,84.563,rs1006588,0.125  
3,84.564,rs40494,0.124  
3,84.578,rs251039,0.108  
3,84.581,rs13085295,0.105  
3,84.640,rs7637925,0.111  
3,84.651,rs7647357,0.111  
3,84.662,rs9311835,0.104  
3,84.677,rs9879067,0.095  
3,84.707,rs886562,0.085  
3,84.739,rs880417,0.084  
3,84.750,rs6764198,0.069  
3,84.804,rs7627359,0.085  
3,84.858,rs10510873,0.093  
3,85.001,rs6445263,0.115  
3,85.021,rs11130880,0.127  
3,85.056,rs17066359,0.157  
3,85.058,rs1979673,0.165  
3,85.064,rs6777784,0.190  
3,85.070,rs6445266,0.190  
3,85.098,rs9857515,0.180  
3,85.120,rs2251423,0.165  
3,85.176,rs833649,0.112  
3,85.191,rs2659467,0.106  
3,85.266,rs1567092,0.110  
3,85.270,rs6772352,0.113  
3,85.386,rs4688305,0.133  
3,85.389,rs6445281,0.133  
3,85.510,rs1658789,0.158  
3,85.663,rs17067195,0.177

3,85.716,rs13077848,0.184  
3,85.724,rs6769778,0.185  
3,85.756,rs304180,0.183  
3,85.766,rs13325109,0.184  
3,85.899,rs17358923,0.188  
3,85.913,rs6796067,0.191  
3,86.014,rs12631887,0.202  
3,86.220,rs6445307,0.199  
3,86.370,rs1900585,0.191  
3,86.420,rs9848161,0.184  
3,86.587,rs9311860,0.158  
3,86.612,rs7631923,0.150  
3,86.802,rs9829816,0.092  
3,86.876,rs17068484,0.076  
3,86.889,rs1901304,0.074  
3,86.941,rs6445345,0.086  
3,86.968,rs4688398,0.085  
3,86.970,rs6806334,0.087  
3,87.038,rs6765108,0.179  
3,87.085,rs11708840,0.181  
3,87.086,rs11918416,0.181  
3,87.086,rs17068891,0.181  
3,87.092,rs11708252,0.175  
3,87.123,rs1505597,0.152  
3,87.133,rs4688173,0.149  
3,87.140,rs1394900,0.146  
3,87.186,rs6809477,0.128  
3,87.270,rs7646765,0.112  
3,87.278,rs964902,0.110  
3,87.358,rs1390442,0.111  
3,87.364,rs4583650,0.101  
3,87.370,rs7629447,0.120  
3,87.506,rs1472337,0.097  
3,87.511,rs9859821,0.097  
3,88.129,rs696010,0.072  
3,88.146,rs1835898,0.070  
3,88.162,rs697270,0.065  
3,88.173,rs753562,0.065  
3,88.195,rs184452,0.066  
3,88.233,rs153717,0.064  
3,88.279,rs17070461,0.085  
3,88.407,rs4234676,0.160  
3,88.592,rs4327386,0.151  
3,88.634,rs6787443,0.148  
3,88.648,rs2371358,0.132  
3,88.660,rs4488822,0.130  
3,88.701,rs2888015,0.136  
3,88.819,rs7627455,0.151  
3,88.922,rs6771712,0.147  
3,89.033,rs9830450,0.143  
3,89.057,rs9855230,0.143  
3,89.075,rs7635505,0.143  
3,89.080,rs9836710,0.122  
3,89.089,rs9820318,0.125  
3,89.143,rs4688500,0.143  
3,89.237,rs17727064,0.142  
3,89.317,rs17334102,0.125  
3,89.886,rs9311929,0.106  
3,90.013,rs2128406,0.101  
3,90.068,rs931233,0.101  
3,90.146,rs17072628,0.100

3,90.149,rs1479950,0.100  
3,90.166,rs6770043,0.100  
3,90.168,rs17415670,0.100  
3,90.188,rs9875900,0.096  
3,90.214,rs13086188,0.088  
3,90.239,rs1318477,0.080  
3,90.252,rs9859944,0.079  
3,90.326,rs6778911,0.073  
3,90.328,rs12493497,0.072  
3,90.330,rs7428806,0.073  
3,90.407,rs17430548,0.084  
3,90.424,rs1554664,0.086  
3,90.484,rs1917524,0.076  
3,90.522,rs4407359,0.074  
3,90.626,rs11714649,0.079  
3,90.633,rs7610241,0.082  
3,90.653,rs2047533,0.094  
3,90.690,rs1495453,0.118  
3,90.725,rs2643723,0.110  
3,90.730,rs17295791,0.109  
3,90.733,rs1108718,0.109  
3,90.747,rs10510946,0.113  
3,90.784,rs2643727,0.126  
3,90.821,rs1552966,0.137  
3,90.884,rs1430416,0.170  
3,90.904,rs7620106,0.202  
3,91.362,rs13874,0.131  
3,91.380,rs332367,0.132  
3,91.535,rs6549120,0.137  
3,91.698,rs6789596,0.156  
3,91.730,rs4241442,0.160  
3,91.923,rs17044868,0.192  
3,91.926,rs1456916,0.191  
3,92.043,rs11711551,0.185  
3,92.047,rs1001763,0.208  
3,92.058,rs9862866,0.210  
3,92.272,rs7646301,0.187  
3,92.327,rs9843859,0.184  
3,92.334,rs6796957,0.185  
3,92.437,rs4487196,0.167  
3,92.483,rs6776236,0.190  
3,92.568,rs9814525,0.191  
3,92.609,rs6765905,0.198  
3,92.628,rs7609636,0.215  
3,92.650,rs4347959,0.227  
3,92.714,rs7611269,0.259  
3,92.766,rs1979639,0.326  
3,92.769,rs11923377,0.336  
3,92.771,rs2101566,0.341  
3,92.772,rs1352658,0.346  
3,92.786,rs4450832,0.351  
3,92.795,rs4856863,0.418  
3,92.891,rs2250952,0.463  
3,92.917,rs7646094,0.473  
3,92.995,rs6548756,0.509  
3,93.011,rs4856894,0.516  
3,93.011,rs4331688,0.516  
3,93.026,rs6789499,0.528  
3,93.165,rs6548962,0.573  
3,93.212,rs1007583,0.595  
3,93.241,rs4311217,0.582

3,93.264,rs10440086,0.560  
3,93.272,rs9826468,0.559  
3,93.273,rs2313273,0.557  
3,93.273,rs6549098,0.554  
3,93.278,rs17231705,0.540  
3,93.280,rs9837363,0.536  
3,93.296,rs1491758,0.527  
3,93.346,rs9833308,0.586  
3,93.413,rs17047811,0.647  
3,93.420,rs6770575,0.644  
3,93.424,rs872114,0.642  
3,93.585,rs2171871,0.603  
3,93.605,rs17048119,0.607  
3,93.610,rs17048130,0.608  
3,93.711,rs12714750,0.616  
3,93.719,rs7038,0.665  
3,93.753,rs4282064,0.677  
3,93.758,rs6787362,0.675  
3,93.783,rs9840469,0.665  
3,93.787,rs4530530,0.662  
3,93.802,rs17005571,0.638  
3,93.808,rs2046374,0.628  
3,93.821,rs9813130,0.602  
3,93.862,rs7635662,0.599  
3,93.865,rs2128972,0.598  
3,93.871,rs981054,0.598  
3,93.878,rs7643187,0.597  
3,93.896,rs6795389,0.595  
3,93.927,rs17006013,0.590  
3,93.930,rs1995178,0.589  
3,93.959,rs4855413,0.577  
3,93.959,rs7653611,0.577  
3,93.994,rs6773506,0.543  
3,94.024,rs12631428,0.543  
3,94.043,rs17006368,0.543  
3,94.056,rs6794315,0.543  
3,94.142,rs1367370,0.596  
3,94.178,rs2320172,0.611  
3,94.332,rs9310179,0.668  
3,94.338,rs6809108,0.668  
3,94.606,rs7430272,0.641  
3,94.639,rs6790613,0.628  
3,94.670,rs13089371,0.611  
3,94.709,rs6549329,0.592  
3,94.823,rs805478,0.564  
3,94.847,rs9831386,0.535  
3,94.861,rs13070827,0.527  
3,94.900,rs7432792,0.536  
3,95.058,rs6762974,0.501  
3,95.076,rs11128181,0.502  
3,95.123,rs7628382,0.493  
3,95.200,rs10511006,0.477  
3,95.354,rs6763648,0.443  
3,95.459,rs2573174,0.448  
3,95.614,rs9847154,0.429  
3,95.838,rs831438,0.353  
3,95.869,rs9856263,0.342  
3,95.904,rs11923661,0.331  
3,95.917,rs10511014,0.320  
3,95.943,rs4677029,0.298  
3,95.967,rs2037474,0.307

3,95.995,rs6549383,0.318  
3,96.012,rs880543,0.327  
3,96.066,rs2280518,0.373  
3,96.073,rs1288696,0.377  
3,96.103,rs17008474,0.357  
3,96.184,rs13072512,0.302  
3,96.206,rs6549387,0.295  
3,96.210,rs10470554,0.268  
3,96.285,rs6771130,0.314  
3,96.526,rs830617,0.237  
3,96.531,rs1288124,0.235  
3,96.533,rs7612407,0.262  
3,96.548,rs9872923,0.249  
3,96.557,rs11710870,0.212  
3,96.563,rs704275,0.256  
3,96.580,rs704285,0.292  
3,96.604,rs3796226,0.274  
3,96.609,rs6767160,0.269  
3,96.633,rs6804667,0.257  
3,96.710,rs1374912,0.255  
3,96.723,rs6782813,0.258  
3,96.733,rs1320015,0.261  
3,96.796,rs1316318,0.274  
3,96.806,rs10514728,0.278  
3,96.828,rs6770667,0.284  
3,97.130,rs1995453,0.245  
3,97.136,rs7624088,0.243  
3,97.180,rs4234146,0.230  
3,97.268,rs11706411,0.216  
3,97.284,rs9880789,0.215  
3,97.485,rs9829101,0.240  
3,97.624,rs9874496,0.234  
3,97.982,rs6549439,0.213  
3,98.065,rs4677097,0.278  
3,98.176,rs9865222,0.295  
3,98.190,rs4677105,0.295  
3,98.227,rs6784559,0.260  
3,98.237,rs11707718,0.264  
3,98.249,rs9829428,0.267  
3,98.561,rs9878609,0.110  
3,98.609,rs9815397,0.099  
3,98.657,rs7642076,0.115  
3,98.719,rs9847707,0.108  
3,98.856,rs11920844,0.111  
3,98.913,rs9815886,0.123  
3,98.975,rs11915307,0.122  
3,99.269,rs2028241,0.112  
3,99.275,rs11128275,0.110  
3,99.357,rs9849164,0.103  
3,99.366,rs4074154,0.104  
3,99.500,rs2029507,0.114  
3,99.537,rs17677643,0.107  
3,99.596,rs4677197,0.121  
3,99.620,rs17010036,0.126  
3,99.627,rs4677201,0.127  
3,99.684,rs2322573,0.128  
3,99.765,rs9985487,0.135  
3,99.903,rs7632726,0.150  
3,100.073,rs4676894,0.123  
3,100.318,rs13099810,0.086  
3,100.536,rs1060584,0.060

3,100.784,rs17694568,0.052  
3,100.802,rs9850430,0.055  
3,100.811,rs6775039,0.066  
3,100.828,rs4676904,0.072  
3,100.846,rs2035580,0.079  
3,100.859,rs7618585,0.058  
3,100.894,rs7633357,0.049  
3,100.976,rs1107251,0.041  
3,100.990,rs6784750,0.040  
3,101.068,rs7619189,0.036  
3,101.134,rs3901920,0.045  
3,101.170,rs11128329,0.051  
3,101.213,rs7064,0.045  
3,101.218,rs6787588,0.046  
3,101.435,rs6783760,0.052  
3,101.544,rs4535167,0.058  
3,101.680,rs9879918,0.045  
3,101.803,rs9310279,0.049  
3,101.901,rs1949120,0.050  
3,101.962,rs17756459,0.052  
3,101.968,rs3856583,0.055  
3,102.008,rs291477,0.074  
3,102.070,rs484332,0.077  
3,102.087,rs291516,0.077  
3,102.135,rs6796430,0.064  
3,102.158,rs291485,0.064  
3,102.200,rs4677353,0.061  
3,102.334,rs6785650,0.051  
3,102.354,rs1405402,0.039  
3,102.440,rs4416330,0.053  
3,102.542,rs9990420,0.079  
3,102.566,rs6800733,0.081  
3,102.638,rs1526710,0.088  
3,102.686,rs6549582,0.091  
3,102.781,rs6799162,0.103  
3,102.811,rs4234186,0.108  
3,102.824,rs35961,0.110  
3,102.841,rs541653,0.116  
3,102.850,rs862825,0.102  
3,102.855,rs9867036,0.092  
3,102.866,rs529655,0.081  
3,102.885,rs549560,0.063  
3,102.886,rs551595,0.094  
3,102.922,rs4073942,0.072  
3,102.949,rs7430250,0.057  
3,102.955,rs7635421,0.054  
3,102.963,rs9830820,0.052  
3,103.007,rs11928037,0.051  
3,103.131,rs7651319,0.044  
3,103.433,rs6768580,0.050  
3,103.435,rs12490683,0.050  
3,103.674,rs3887345,0.067  
3,103.762,rs9310350,0.083  
3,103.779,rs4095546,0.069  
3,103.791,rs7642330,0.069  
3,103.842,rs9868043,0.074  
3,103.875,rs2126536,0.059  
3,103.876,rs11128503,0.059  
3,104.058,rs9882550,0.030  
3,104.059,rs7612860,0.030  
3,104.094,rs7431017,0.031



3,104.151,rs6793784,0.022  
3,104.223,rs1816955,0.013  
3,104.246,rs9851014,0.012  
3,104.288,rs264553,0.010  
3,104.445,rs1146013,0.004  
3,104.474,rs6775462,0.004  
3,104.532,rs1166981,0.004  
3,104.535,rs11127568,0.004  
3,104.592,rs9827948,0.004  
3,104.635,rs9850420,0.005  
3,104.697,rs6786589,0.009  
3,104.807,rs4459934,0.013  
3,104.828,rs9816491,0.012  
3,104.910,rs7615545,0.002  
3,104.925,rs7432300,0.002  
3,104.986,rs1110226,0.004  
3,105.090,rs9882239,0.009  
3,105.100,rs10511057,0.009  
3,105.106,rs7433256,0.009  
3,105.109,rs2875436,0.009  
3,105.193,rs4449296,0.011  
3,105.272,rs7432690,0.023  
3,105.351,rs9872416,0.024  
3,105.356,rs2166802,0.023  
3,105.640,rs1178778,0.006  
3,105.658,rs9883373,0.006  
3,105.703,rs776122,0.005  
3,105.709,rs12634677,0.005  
3,105.927,rs6793440,0.000  
3,106.019,rs7615248,0.000  
3,106.256,rs7645598,0.001  
3,106.453,rs7645322,0.003  
3,106.471,rs6775945,0.004  
3,106.518,rs1512487,0.005  
3,106.624,rs9309797,0.004  
3,106.772,rs7650723,0.002  
3,106.775,rs9866490,0.002  
3,106.880,rs9876636,0.001  
3,106.932,rs2660739,0.001  
3,107.029,rs2304503,0.002  
3,107.057,rs333472,0.000  
3,107.125,rs17377726,0.000  
3,107.180,rs498805,0.000  
3,107.189,rs9832632,0.000  
3,107.212,rs6766522,0.000  
3,107.242,rs9866364,0.002  
3,107.317,rs9832396,0.000  
3,107.336,rs7622139,0.000  
3,107.345,rs1387665,0.000  
3,107.420,rs9863111,-0.000  
3,107.430,rs4680967,-0.000  
3,107.464,rs6775791,0.000  
3,107.505,rs2639256,0.006  
3,107.509,rs1370894,0.007  
3,107.514,rs2639229,0.010  
3,107.518,rs2372752,0.013  
3,107.524,rs10865593,0.015  
3,107.530,rs7611835,0.015  
3,107.540,rs11714085,0.009  
3,107.546,rs7645184,0.009  
3,107.548,rs1461616,0.009

3,107.549,rs6778246,0.004  
3,107.787,rs3772902,0.003  
3,107.933,rs17019353,0.004  
3,108.059,rs9875387,0.001  
3,108.424,rs6780231,-0.032  
3,108.425,rs17021121,-0.032  
3,108.474,rs6767473,-0.050  
3,108.487,rs9837479,-0.050  
3,108.561,rs7618782,-0.047  
3,108.626,rs1551213,-0.031  
3,108.634,rs7622240,-0.030  
3,108.677,rs9867437,-0.021  
3,108.680,rs9810211,-0.021  
3,108.754,rs9861174,-0.029  
3,108.768,rs2875492,-0.030  
3,108.902,rs1512935,-0.036  
3,109.150,rs725579,-0.049  
3,109.178,rs17181079,-0.051  
3,109.202,rs17024019,-0.063  
3,109.207,rs904115,-0.063  
3,109.261,rs9846815,-0.071  
3,109.290,rs6793602,-0.059  
3,109.356,rs6799017,-0.051  
3,109.491,rs6788125,-0.049  
3,109.636,rs936361,-0.056  
3,109.653,rs17025629,-0.059  
3,109.680,rs9874688,-0.065  
3,109.728,rs7645228,-0.077  
3,109.886,rs7638288,-0.083  
3,109.942,rs11914750,-0.084  
3,109.981,rs1496515,-0.070  
3,110.021,rs1040017,-0.074  
3,110.079,rs7372560,-0.084  
3,110.266,rs9681884,-0.154  
3,110.292,rs4857329,-0.162  
3,110.297,rs6771948,-0.161  
3,110.299,rs16843322,-0.154  
3,110.301,rs9871395,-0.148  
3,110.307,rs4857458,-0.132  
3,110.330,rs8180036,-0.143  
3,110.331,rs3905886,-0.144  
3,110.332,rs7612444,-0.145  
3,110.346,rs520258,-0.148  
3,110.366,rs1397977,-0.151  
3,110.374,rs9863045,-0.177  
3,110.377,rs4857185,-0.189  
3,110.382,rs10511153,-0.209  
3,110.384,rs1514422,-0.218  
3,110.385,rs6800770,-0.191  
3,110.390,rs9289152,-0.194  
3,110.401,rs937878,-0.184  
3,110.415,rs6767738,-0.169  
3,110.417,rs7614446,-0.166  
3,110.432,rs9843787,-0.162  
3,110.438,rs1545127,-0.160  
3,110.439,rs301927,-0.160  
3,110.442,rs719278,-0.144  
3,110.484,rs4857302,-0.126  
3,110.516,rs7638369,-0.095  
3,110.552,rs695229,-0.063  
3,110.566,rs12054461,-0.062

3,110.570,rs4518168,-0.062  
3,110.674,rs17195199,-0.054  
3,110.776,rs9857087,-0.031  
3,110.808,rs10511167,-0.030  
3,110.819,rs1529045,-0.030  
3,110.831,rs1529047,-0.030  
3,110.840,rs9289628,-0.030  
3,110.936,rs4857414,-0.029  
3,111.091,rs2062059,-0.028  
3,111.249,rs1879376,-0.024  
3,111.253,rs4928176,-0.024  
3,111.428,rs2089983,-0.020  
3,111.501,rs13059876,-0.019  
3,111.552,rs704574,-0.017  
3,111.820,rs6772774,-0.010  
3,111.860,rs9881690,-0.018  
3,111.865,rs1828669,-0.016  
3,111.866,rs1707574,-0.017  
3,111.871,rs1606462,-0.016  
3,111.924,rs771767,-0.007  
3,111.944,rs771809,-0.007  
3,111.969,rs1877818,-0.007  
3,111.976,rs12486534,-0.004  
3,111.987,rs16844748,-0.004  
3,112.026,rs2619284,-0.005  
3,112.047,rs11927186,-0.006  
3,112.166,rs985374,-0.005  
3,112.236,rs6794388,-0.005  
3,112.298,rs1620217,-0.006  
3,112.586,rs1241287,-0.012  
3,112.783,rs10937285,-0.030  
3,112.928,rs7639547,-0.028  
3,112.956,rs9862353,-0.033  
3,112.982,rs6792532,-0.021  
3,113.023,rs4314176,-0.022  
3,113.049,rs9851044,-0.036  
3,113.206,rs16846607,-0.077  
3,113.215,rs16846615,-0.078  
3,113.346,rs9825206,-0.084  
3,113.380,rs1379627,-0.085  
3,113.393,rs7634768,-0.085  
3,113.408,rs2166826,-0.086  
3,113.417,rs7628112,-0.086  
3,113.441,rs6804331,-0.082  
3,113.474,rs1666559,-0.073  
3,113.527,rs1104964,-0.091  
3,113.560,rs2895264,-0.098  
3,113.607,rs9833635,-0.108  
3,113.677,rs13061353,-0.135  
3,113.802,rs7648727,-0.166  
3,113.807,rs6776313,-0.166  
3,113.836,rs9848965,-0.168  
3,113.861,rs6437533,-0.177  
3,113.930,rs3996202,-0.202  
3,113.959,rs12635480,-0.194  
3,113.963,rs13061652,-0.193  
3,113.984,rs1436349,-0.204  
3,113.992,rs12486139,-0.206  
3,114.072,rs9819891,-0.237  
3,114.075,rs1503079,-0.238  
3,114.144,rs9861329,-0.269

3,114.152,rs6770943,-0.269  
3,114.169,rs7626224,-0.267  
3,114.201,rs1716127,-0.286  
3,114.214,rs7624664,-0.291  
3,114.240,rs6437577,-0.259  
3,114.298,rs4894924,-0.267  
3,114.356,rs6769329,-0.288  
3,114.380,rs3772554,-0.296  
3,114.392,rs1546733,-0.300  
3,114.536,rs2174233,-0.313  
3,114.555,rs1503920,-0.318  
3,114.562,rs2618316,-0.322  
3,114.603,rs7632765,-0.368  
3,114.651,rs17201890,-0.378  
3,114.755,rs7620758,-0.367  
3,114.759,rs6437662,-0.361  
3,114.782,rs7616267,-0.328  
3,114.792,rs1031170,-0.333  
3,114.797,rs722813,-0.368  
3,114.801,rs968072,-0.352  
3,114.802,rs1445076,-0.352  
3,114.871,rs2399106,-0.384  
3,114.898,rs12633892,-0.391  
3,114.913,rs11928487,-0.395  
3,114.925,rs2399114,-0.390  
3,115.017,rs709570,-0.419  
3,115.147,rs6781540,-0.385  
3,115.286,rs9867707,-0.372  
3,115.304,rs7430092,-0.372  
3,115.308,rs1881309,-0.371  
3,115.311,rs11915523,-0.371  
3,115.357,rs1283098,-0.369  
3,115.389,rs13326490,-0.354  
3,115.450,rs2676364,-0.327  
3,115.523,rs793556,-0.309  
3,115.739,rs9851055,-0.228  
3,115.760,rs696377,-0.259  
3,115.808,rs643938,-0.218  
3,115.914,rs923952,-0.196  
3,115.962,rs10933925,-0.209  
3,115.965,rs1437238,-0.213  
3,115.989,rs840281,-0.238  
3,116.016,rs9845309,-0.267  
3,116.052,rs696375,-0.299  
3,116.054,rs9859911,-0.299  
3,116.240,rs326352,-0.270  
3,116.631,rs2290600,-0.217  
3,116.683,rs9810676,-0.216  
3,117.003,rs11922147,-0.237  
3,117.295,rs3762793,-0.257  
3,117.321,rs11919162,-0.230  
3,117.344,rs7609997,-0.216  
3,117.374,rs2399248,-0.218  
3,117.380,rs4855675,-0.223  
3,117.381,rs9875407,-0.224  
3,117.483,rs4555525,-0.204  
3,117.537,rs6774626,-0.182  
3,117.562,rs6807870,-0.178  
3,117.577,rs2673391,-0.175  
3,117.581,rs1163391,-0.175  
3,117.592,rs9876733,-0.173

3,117.610,rs11712428,-0.197  
3,117.915,rs1403250,-0.199  
3,118.310,rs6797827,-0.192  
3,118.386,rs1915337,-0.195  
3,118.412,rs694022,-0.195  
3,118.610,rs605795,-0.181  
3,118.652,rs12634736,-0.155  
3,118.659,rs2399328,-0.151  
3,118.678,rs1606368,-0.141  
3,118.818,rs1512516,-0.112  
3,118.962,rs1903678,-0.095  
3,119.013,rs9873710,-0.108  
3,119.020,rs1462307,-0.110  
3,119.078,rs2399346,-0.094  
3,119.109,rs10514755,-0.086  
3,119.110,rs6763050,-0.086  
3,119.265,rs4682242,-0.079  
3,119.266,rs7432694,-0.079  
3,119.289,rs2932054,-0.083  
3,119.300,rs2958089,-0.083  
3,119.313,rs12637512,-0.083  
3,119.358,rs2950985,-0.084  
3,119.428,rs2173318,-0.086  
3,119.507,rs951338,-0.081  
3,119.536,rs6790722,-0.079  
3,119.541,rs4682314,-0.079  
3,119.542,rs4349472,-0.078  
3,119.608,rs13091880,-0.076  
3,119.619,rs6804475,-0.077  
3,119.645,rs774757,-0.075  
3,119.660,rs4386465,-0.092  
3,119.678,rs191454,-0.106  
3,119.704,rs9835431,-0.095  
3,119.784,rs12491414,-0.104  
3,119.809,rs1050572,-0.107  
3,119.822,rs1879512,-0.107  
3,119.826,rs6438069,-0.107  
3,119.827,rs1032239,-0.107  
3,119.830,rs9851461,-0.106  
3,119.838,rs999802,-0.104  
3,119.865,rs1982809,-0.104  
3,119.866,rs2171513,-0.104  
3,119.937,rs4290780,-0.103  
3,119.955,rs7620601,-0.106  
3,119.990,rs6438101,-0.092  
3,119.997,rs2399460,-0.079  
3,120.008,rs10934215,-0.069  
3,120.029,rs11923603,-0.050  
3,120.036,rs953201,-0.046  
3,120.041,rs972554,-0.039  
3,120.047,rs9288979,-0.026  
3,120.049,rs904626,-0.023  
3,120.050,rs16860670,-0.019  
3,120.053,rs6769798,-0.012  
3,120.141,rs6775574,-0.009  
3,120.302,rs13092825,-0.005  
3,120.330,rs2669910,-0.005  
3,120.337,rs13070953,-0.004  
3,120.340,rs3773688,-0.005  
3,120.356,rs950357,-0.011  
3,120.484,rs12695294,-0.033

3,120.552,rs2566980,-0.033  
3,120.564,rs1025398,-0.030  
3,120.569,rs2712355,-0.032  
3,120.585,rs16861409,-0.027  
3,120.595,rs6438175,-0.025  
3,120.651,rs6438180,-0.019  
3,120.706,rs6280,-0.022  
3,120.711,rs6787134,-0.019  
3,120.734,rs2062834,-0.019  
3,120.765,rs17607135,-0.030  
3,120.783,rs2693039,-0.037  
3,120.805,rs9881461,-0.047  
3,120.813,rs10511330,-0.050  
3,120.814,rs2733403,-0.050  
3,120.833,rs9882269,-0.052  
3,120.848,rs2718424,-0.060  
3,120.853,rs2718425,-0.061  
3,120.885,rs7615798,-0.073  
3,120.889,rs2953676,-0.074  
3,120.899,rs7637678,-0.082  
3,121.198,rs9289008,-0.075  
3,121.403,rs4831217,-0.068  
3,121.681,rs10511343,-0.059  
3,121.719,rs9849343,-0.073  
3,121.734,rs16823858,-0.072  
3,121.756,rs7611310,-0.066  
3,121.762,rs10934299,-0.068  
3,121.767,rs736884,-0.067  
3,121.793,rs7634702,-0.063  
3,121.801,rs9848541,-0.062  
3,121.827,rs714697,-0.057  
3,121.839,rs9879241,-0.052  
3,121.848,rs10934301,-0.049  
3,121.868,rs2164930,-0.051  
3,121.872,rs3772917,-0.049  
3,121.885,rs9858175,-0.045  
3,121.900,rs2972474,-0.039  
3,122.027,rs2289271,-0.017  
3,122.095,rs1516519,-0.011  
3,122.103,rs10511351,-0.006  
3,122.106,rs9830559,-0.005  
3,122.117,rs17712069,-0.004  
3,122.138,rs7612435,-0.003  
3,122.174,rs4240161,-0.001  
3,122.195,rs6769601,-0.001  
3,122.462,rs4296590,0.000  
3,122.543,rs1401069,-0.000  
3,122.550,rs1518321,-0.001  
3,122.558,rs7640361,-0.000  
3,122.575,rs9841113,-0.000  
3,122.622,rs10934369,-0.002  
3,122.623,rs10511360,-0.002  
3,122.663,rs7627376,-0.002  
3,122.704,rs7613406,-0.003  
3,122.788,rs1133604,-0.003  
3,122.811,rs3842972,-0.005  
3,122.855,rs4855890,-0.009  
3,122.901,rs869407,-0.009  
3,122.941,rs7653706,-0.009  
3,122.946,rs12493930,-0.009  
3,122.967,rs9289071,-0.013

3,122.978,rs9836910,-0.014  
3,122.981,rs9810432,-0.015  
3,122.992,rs6784605,-0.023  
3,122.993,rs1818768,-0.023  
3,122.999,rs9844832,-0.027  
3,123.025,rs4145154,-0.028  
3,123.139,rs938170,-0.011  
3,123.168,rs3849471,-0.008  
3,123.183,rs4855941,-0.013  
3,123.217,rs6800555,-0.006  
3,123.322,rs6797385,-0.000  
3,123.338,rs6806321,0.000  
3,123.372,rs16826997,0.000  
3,123.392,rs2927280,0.001  
3,123.395,rs16827045,0.001  
3,123.412,rs9830523,0.002  
3,123.429,rs4616651,0.003  
3,123.439,rs2927271,0.005  
3,123.461,rs6783096,0.004  
3,123.638,rs7646668,0.003  
3,123.767,rs13066603,0.002  
3,124.179,rs1392265,0.008  
3,124.557,rs12636589,0.013  
3,124.627,rs9846915,0.014  
3,125.439,rs9817827,0.024  
3,125.482,rs17202866,0.025  
3,125.495,rs6765745,0.026  
3,125.507,rs4687935,0.026  
3,125.610,rs705236,0.022  
3,125.801,rs1081896,0.018  
3,125.809,rs7625631,0.018  
3,125.944,rs1879553,0.014  
3,125.950,rs1521293,0.014  
3,126.322,rs11925868,0.000  
3,126.472,rs9878040,-0.001  
3,126.570,rs6795868,-0.002  
3,126.612,rs13099637,-0.001  
3,126.626,rs1259475,-0.001  
3,126.717,rs12489104,-0.005  
3,126.754,rs373188,-0.007  
3,126.760,rs12629908,-0.007  
3,126.766,rs2016491,-0.007  
3,126.771,rs10049328,-0.007  
3,126.854,rs1403719,-0.008  
3,126.891,rs9848328,-0.008  
3,126.910,rs9289163,-0.011  
3,126.993,rs790125,-0.043  
3,127.112,rs9812646,-0.038  
3,127.113,rs9855669,-0.039  
3,127.278,rs4478030,-0.044  
3,127.287,rs9816759,-0.047  
3,127.293,rs4234209,-0.049  
3,127.306,rs998945,-0.053  
3,127.373,rs12485921,-0.049  
3,127.378,rs6809947,-0.050  
3,127.422,rs1078982,-0.062  
3,127.443,rs9820435,-0.071  
3,127.460,rs1976716,-0.084  
3,127.474,rs870429,-0.114  
3,127.657,rs9289218,-0.100  
3,127.748,rs9841477,-0.105

3,127.786,rs9861395,-0.106  
3,128.124,rs11709947,-0.099  
3,128.148,rs820360,-0.098  
3,128.263,rs9283570,-0.108  
3,128.282,rs11718105,-0.112  
3,128.402,rs2124508,-0.085  
3,128.731,rs17310770,-0.058  
3,129.224,rs895062,-0.028  
3,129.261,rs756037,-0.027  
3,129.546,rs661798,-0.031  
3,129.571,rs2289845,-0.031  
3,129.648,rs2289839,-0.031  
3,129.672,rs7623685,-0.033  
3,129.740,rs556031,-0.045  
3,130.071,rs1501187,-0.039  
3,130.087,rs333284,-0.039  
3,130.128,rs3863064,-0.039  
3,130.214,rs13082230,-0.036  
3,130.322,rs3772836,-0.023  
3,130.449,rs9968182,-0.006  
3,130.531,rs2877822,-0.009  
3,130.538,rs12495301,-0.009  
3,130.547,rs10934702,-0.008  
3,130.559,rs7644047,-0.008  
3,130.716,rs2981548,-0.001  
3,130.743,rs4679258,-0.004  
3,130.765,rs2333038,-0.003  
3,130.816,rs2333034,-0.002  
3,130.869,rs2922188,-0.010  
3,130.914,rs9827398,-0.011  
3,130.919,rs2735226,-0.011  
3,130.969,rs4340655,-0.001  
3,131.114,rs3936031,0.001  
3,131.185,rs6792028,0.002  
3,131.230,rs10934751,0.002  
3,131.234,rs16837171,0.002  
3,131.241,rs4646703,0.001  
3,131.399,rs2044577,-0.004  
3,131.402,rs731221,-0.004  
3,131.403,rs747037,-0.004  
3,131.409,rs4679115,-0.004  
3,131.422,rs7612364,-0.005  
3,131.445,rs9825812,-0.002  
3,131.549,rs1877966,-0.011  
3,131.553,rs9864977,-0.011  
3,131.570,rs2280677,-0.013  
3,131.600,rs6794488,-0.024  
3,131.621,rs13316625,-0.024  
3,131.626,rs13099144,-0.024  
3,131.713,rs1687482,-0.026  
3,132.306,rs9637365,-0.015  
3,132.384,rs1550991,-0.017  
3,132.536,rs6785036,-0.015  
3,132.592,rs1007390,-0.015  
3,132.705,rs9810372,-0.000  
3,132.709,rs10934803,-0.000  
3,132.752,rs6807545,-0.000  
3,132.782,rs11710590,0.000  
3,132.790,rs6802930,0.000  
3,132.811,rs10934807,-0.001  
3,132.864,rs6414306,-0.004



3,132.906,rs9990353,-0.012  
3,132.912,rs2358544,-0.007  
3,132.977,rs1374924,-0.005  
3,132.994,rs10804581,-0.005  
3,133.007,rs1562531,-0.005  
3,133.049,rs2594210,-0.006  
3,133.153,rs782446,-0.003  
3,133.163,rs782437,-0.002  
3,133.208,rs7651814,0.000  
3,133.212,rs664910,0.000  
3,133.221,rs608318,0.000  
3,133.224,rs684358,0.001  
3,133.227,rs13066225,0.003  
3,133.237,rs9846048,0.003  
3,133.304,rs4974416,0.017  
3,133.338,rs7640916,0.026  
3,133.406,rs16839633,0.016  
3,133.415,rs13100951,0.015  
3,133.530,rs7650365,0.006  
3,133.827,rs2659703,0.024  
3,133.829,rs4857895,0.024  
3,133.838,rs13071640,0.034  
3,133.847,rs10934854,0.045  
3,133.851,rs2713594,0.048  
3,133.870,rs7629791,0.084  
3,133.880,rs2659695,0.081  
3,133.926,rs12495912,0.068  
3,133.937,rs2713575,0.065  
3,134.055,rs10934861,0.075  
3,135.106,rs6439154,0.131  
3,135.351,rs7636293,0.128  
3,135.459,rs4688850,0.204  
3,135.473,rs10934884,0.209  
3,135.481,rs2301570,0.209  
3,135.571,rs7610060,0.187  
3,135.576,rs2301572,0.186  
3,135.627,rs10934891,0.171  
3,135.898,rs2175730,0.100  
3,136.194,rs13080253,0.073  
3,136.350,rs2971565,0.066  
3,136.427,rs10934949,0.069  
3,136.495,rs7614116,0.071  
3,136.622,rs12493491,0.063  
3,136.973,rs7639065,0.073  
3,137.162,rs4854625,0.073  
3,137.235,rs9867458,0.075  
3,137.245,rs2251178,0.075  
3,137.305,rs7611808,0.061  
3,137.328,rs9822908,0.056  
3,137.329,rs16837371,0.055  
3,137.365,rs6762188,0.026  
3,137.417,rs10512824,0.016  
3,137.423,rs1913285,0.015  
3,137.532,rs883370,0.006  
3,137.548,rs1225047,0.006  
3,137.562,rs6785853,0.006  
3,137.626,rs2369364,0.004  
3,137.672,rs9289416,0.001  
3,137.714,rs3851997,-0.002  
3,137.725,rs4083132,-0.003  
3,137.758,rs1395006,-0.004

3,137.916,rs6776932,-0.007  
3,138.039,rs2133692,-0.021  
3,138.160,rs6786305,-0.024  
3,138.199,rs3860501,-0.024  
3,138.203,rs6766736,-0.024  
3,138.213,rs3860503,-0.024  
3,138.334,rs9881437,-0.026  
3,138.392,rs9813321,-0.027  
3,138.404,rs6777507,-0.027  
3,138.410,rs10512871,-0.027  
3,138.469,rs7625328,-0.027  
3,138.601,rs7631163,-0.029  
3,138.620,rs3897016,-0.026  
3,138.759,rs6439400,-0.009  
3,138.778,rs11717365,-0.010  
3,138.827,rs7652889,-0.016  
3,138.846,rs9876777,-0.014  
3,138.856,rs13095648,-0.014  
3,138.861,rs13059279,-0.012  
3,138.866,rs7647249,-0.008  
3,138.873,rs12630919,-0.008  
3,138.875,rs4854723,-0.008  
3,139.030,rs2718812,-0.000  
3,139.070,rs4287912,-0.001  
3,139.098,rs8177313,-0.001  
3,139.168,rs6439441,-0.002  
3,139.193,rs1880666,-0.002  
3,139.224,rs1113479,-0.000  
3,139.274,rs2692687,-0.001  
3,139.282,rs6439445,-0.004  
3,139.334,rs9917636,-0.006  
3,139.346,rs4241363,-0.007  
3,139.369,rs4854785,-0.008  
3,139.380,rs7625035,-0.004  
3,139.388,rs9841380,-0.005  
3,139.434,rs6765810,-0.012  
3,139.449,rs4241367,-0.013  
3,139.513,rs7630560,-0.006  
3,139.534,rs13067800,-0.005  
3,139.701,rs13080059,0.000  
3,139.762,rs1466827,0.001  
3,139.787,rs4974500,-0.001  
3,139.821,rs4602357,-0.004  
3,139.964,rs9821505,-0.010  
3,140.108,rs11923418,-0.018  
3,140.150,rs9289483,-0.021  
3,140.564,rs4955502,-0.035  
3,140.682,rs885594,-0.052  
3,140.892,rs7651593,-0.048  
3,141.034,rs9868348,-0.046  
3,141.143,rs36221,-0.048  
3,141.309,rs40437,-0.045  
3,141.468,rs36132,-0.055  
3,141.826,rs36057,-0.105  
3,141.857,rs6791224,-0.107  
3,141.948,rs11706256,-0.111  
3,141.954,rs7626314,-0.110  
3,141.993,rs3772643,-0.125  
3,142.008,rs6801620,-0.130  
3,142.071,rs7613488,-0.154  
3,142.082,rs9865620,-0.147

3,142.222,rs16842953,-0.151  
3,142.250,rs824070,-0.148  
3,142.407,rs9864846,-0.105  
3,142.420,rs1502186,-0.102  
3,142.457,rs10935172,-0.094  
3,142.466,rs16843144,-0.094  
3,142.476,rs6439579,-0.092  
3,142.538,rs1447598,-0.079  
3,142.546,rs3850168,-0.079  
3,142.659,rs1447600,-0.079  
3,142.661,rs7613386,-0.079  
3,142.823,rs10512975,-0.075  
3,142.862,rs7622329,-0.075  
3,142.919,rs11718972,-0.075  
3,143.915,rs835634,-0.097  
3,144.000,rs752923,-0.094  
3,144.030,rs6788460,-0.092  
3,144.031,rs7626849,-0.094  
3,144.032,rs1478312,-0.096  
3,144.033,rs1542535,-0.097  
3,144.036,rs12630965,-0.117  
3,144.037,rs1899450,-0.124  
3,144.038,rs10935266,-0.124  
3,144.103,rs6766201,-0.157  
3,144.110,rs329129,-0.159  
3,144.148,rs7631734,-0.144  
3,144.209,rs12631438,-0.134  
3,144.243,rs1672927,-0.129  
3,144.274,rs641320,-0.142  
3,144.391,rs9809852,-0.227  
3,144.452,rs6775443,-0.232  
3,144.454,rs7626828,-0.231  
3,144.503,rs6439841,-0.253  
3,144.529,rs10935317,-0.262  
3,144.533,rs4894345,-0.292  
3,144.605,rs12495890,-0.319  
3,144.723,rs7625738,-0.281  
3,144.732,rs16849307,-0.319  
3,144.766,rs13072543,-0.335  
3,144.790,rs1900627,-0.293  
3,144.794,rs2028994,-0.287  
3,144.800,rs6777158,-0.285  
3,144.858,rs17336463,-0.269  
3,144.866,rs4613415,-0.266  
3,144.916,rs986561,-0.242  
3,144.928,rs4683468,-0.236  
3,144.966,rs7652623,-0.221  
3,144.976,rs2882429,-0.216  
3,144.981,rs4683806,-0.187  
3,144.987,rs1320260,-0.161  
3,144.990,rs4638924,-0.161  
3,145.006,rs9289600,-0.163  
3,145.041,rs1878982,-0.167  
3,145.042,rs9816454,-0.167  
3,145.088,rs4142786,-0.165  
3,145.100,rs16850177,-0.164  
3,145.116,rs11915085,-0.157  
3,145.119,rs7618673,-0.156  
3,145.122,rs17411949,-0.156  
3,145.144,rs13073891,-0.157  
3,145.166,rs17348572,-0.163

3,145.171,rs524554,-0.163  
3,145.212,rs10513121,-0.153  
3,145.214,rs16850488,-0.153  
3,145.286,rs7651388,-0.147  
3,145.308,rs7627814,-0.146  
3,145.339,rs7632490,-0.163  
3,145.398,rs6808549,-0.183  
3,145.696,rs16851055,-0.128  
3,145.784,rs2291042,-0.119  
3,145.785,rs875870,-0.119  
3,145.929,rs16851254,-0.139  
3,145.935,rs1026716,-0.140  
3,145.984,rs4683401,-0.179  
3,145.986,rs9809435,-0.178  
3,146.016,rs4683600,-0.144  
3,146.020,rs1983234,-0.143  
3,146.079,rs10513136,-0.168  
3,146.098,rs6762826,-0.167  
3,146.105,rs7612543,-0.166  
3,146.195,rs295302,-0.118  
3,146.199,rs2131495,-0.113  
3,146.209,rs7618625,-0.099  
3,146.217,rs2030184,-0.093  
3,146.231,rs4683620,-0.080  
3,146.239,rs16851667,-0.063  
3,146.240,rs9842908,-0.063  
3,146.268,rs2677421,-0.060  
3,146.307,rs4683630,-0.044  
3,146.308,rs12107859,-0.044  
3,146.324,rs1560413,-0.035  
3,146.419,rs1705619,-0.026  
3,146.443,rs6789998,-0.025  
3,146.475,rs6764361,-0.027  
3,146.711,rs4256152,-0.035  
3,147.820,rs936198,-0.089  
3,147.858,rs6440136,-0.092  
3,147.875,rs6805378,-0.103  
3,147.901,rs17572584,-0.113  
3,147.903,rs10935483,-0.114  
3,147.940,rs4839620,-0.114  
3,147.949,rs12635345,-0.115  
3,147.985,rs4839604,-0.112  
3,147.987,rs961413,-0.115  
3,148.012,rs9810857,-0.142  
3,148.014,rs1046706,-0.142  
3,148.022,rs7641350,-0.142  
3,148.052,rs986376,-0.152  
3,148.101,rs6769555,-0.171  
3,148.207,rs6793522,-0.138  
3,148.213,rs905142,-0.136  
3,148.223,rs4839595,-0.133  
3,148.266,rs10513205,-0.140  
3,148.310,rs2049504,-0.188  
3,148.311,rs9872790,-0.189  
3,148.316,rs1837611,-0.191  
3,148.395,rs16853885,-0.193  
3,148.419,rs6779888,-0.193  
3,148.447,rs13061355,-0.190  
3,148.454,rs12635131,-0.190  
3,148.497,rs7644727,-0.193  
3,148.501,rs10935500,-0.192

3,148.522,rs12489656,-0.186  
3,148.533,rs4839655,-0.198  
3,148.549,rs11712783,-0.215  
3,148.556,rs9829503,-0.217  
3,148.562,rs7616384,-0.214  
3,148.586,rs11714850,-0.201  
3,148.604,rs5025389,-0.217  
3,148.630,rs2007192,-0.198  
3,148.755,rs6440204,-0.164  
3,148.871,rs10935504,-0.152  
3,149.035,rs6784938,-0.139  
3,149.096,rs9862907,-0.136  
3,149.321,rs6770845,-0.125  
3,149.425,rs10490849,-0.128  
3,149.556,rs2717399,-0.131  
3,149.667,rs1182797,-0.138  
3,149.730,rs16855649,-0.132  
3,150.047,rs7615606,-0.105  
3,150.187,rs4401402,-0.083  
3,150.227,rs953859,-0.082  
3,150.296,rs10454765,-0.082  
3,150.392,rs9883600,-0.079  
3,150.706,rs1348657,-0.053  
3,150.749,rs1822907,-0.051  
3,150.923,rs1320914,-0.035  
3,151.293,rs1881036,-0.024  
3,151.389,rs9878320,-0.023  
3,151.402,rs9868350,-0.023  
3,151.488,rs9869039,-0.020  
3,151.578,rs7612202,-0.021  
3,151.647,rs9866001,-0.018  
3,151.668,rs9831692,-0.009  
3,151.685,rs7630694,-0.008  
3,151.741,rs6440401,-0.005  
3,151.816,rs9844407,-0.005  
3,151.831,rs16857836,-0.007  
3,151.841,rs9867807,-0.009  
3,151.891,rs4681298,-0.010  
3,151.914,rs1913185,-0.010  
3,151.928,rs1828652,-0.005  
3,151.931,rs3920230,-0.002  
3,152.033,rs7650361,-0.001  
3,152.064,rs6806643,-0.001  
3,152.099,rs2688692,-0.002  
3,152.108,rs1061307,-0.001  
3,152.125,rs343292,-0.001  
3,152.141,rs9822212,-0.001  
3,152.147,rs163731,-0.001  
3,152.229,rs1019897,-0.000  
3,152.283,rs1464446,0.001  
3,152.295,rs6440468,0.001  
3,152.310,rs11721056,0.000  
3,152.349,rs9814423,0.001  
3,152.642,rs16846545,0.001  
3,152.703,rs1503733,0.001  
3,152.715,rs1532769,0.000  
3,152.902,rs4596113,0.001  
3,152.924,rs13063052,0.002  
3,152.938,rs9862216,0.003  
3,152.942,rs2319333,0.004  
3,152.954,rs2873943,0.009

3,152.970,rs9864940,0.009  
3,152.974,rs6777677,0.009  
3,152.997,rs11928247,0.022  
3,153.003,rs1391796,0.028  
3,153.007,rs1909357,0.031  
3,153.018,rs11922072,0.033  
3,153.064,rs6775904,0.032  
3,153.074,rs7613691,0.032  
3,153.087,rs11708371,0.038  
3,153.088,rs1462654,0.038  
3,153.103,rs9847786,0.038  
3,153.107,rs16860010,0.037  
3,153.120,rs734873,0.032  
3,153.132,rs9848851,0.020  
3,153.146,rs15606,0.024  
3,153.153,rs7635506,0.023  
3,153.277,rs7610876,0.017  
3,153.292,rs1916224,0.016  
3,153.318,rs188019,0.008  
3,153.319,rs182146,0.008  
3,153.322,rs1873901,0.007  
3,153.333,rs2131127,0.004  
3,153.338,rs12695902,0.003  
3,153.341,rs427832,0.002  
3,153.343,rs6772419,0.002  
3,153.354,rs4681158,0.000  
3,153.356,rs1318579,0.000  
3,153.360,rs3772589,0.000  
3,153.399,rs4681161,-0.000  
3,153.425,rs7623208,-0.000  
3,153.431,rs9289775,-0.001  
3,153.445,rs9653951,-0.002  
3,153.450,rs4450762,-0.002  
3,153.479,rs10513344,-0.007  
3,153.740,rs4974389,-0.017  
3,153.743,rs6799507,-0.017  
3,153.785,rs7623663,-0.019  
3,153.791,rs16861645,-0.019  
3,153.826,rs7617219,-0.020  
3,153.838,rs7613093,-0.023  
3,153.852,rs6788873,-0.036  
3,153.863,rs6787602,-0.029  
3,153.874,rs1526787,-0.031  
3,153.890,rs9831865,-0.031  
3,153.902,rs17787898,-0.031  
3,153.919,rs4681495,-0.029  
3,154.016,rs9869237,-0.029  
3,154.092,rs9289788,-0.033  
3,154.142,rs4681524,-0.034  
3,154.172,rs6766575,-0.032  
3,154.183,rs4681526,-0.031  
3,154.211,rs7652697,-0.031  
3,154.273,rs12632837,-0.032  
3,154.344,rs17787978,-0.035  
3,154.752,rs1002896,-0.055  
3,154.853,rs954715,-0.053  
3,155.077,rs3772200,-0.050  
3,155.353,rs16862294,-0.055  
3,155.453,rs3911489,-0.056  
3,155.646,rs4681564,-0.059  
3,155.651,rs1979425,-0.059

3,155.703,rs4484141,-0.058  
3,155.760,rs9857853,-0.067  
3,155.833,rs2903684,-0.069  
3,155.846,rs6784675,-0.067  
3,155.939,rs12638737,-0.055  
3,155.988,rs6790152,-0.040  
3,155.998,rs9813089,-0.037  
3,156.080,rs9838013,-0.035  
3,156.120,rs1463230,-0.032  
3,156.390,rs4681620,-0.025  
3,156.497,rs4234379,-0.024  
3,156.608,rs9883613,-0.021  
3,156.724,rs6440688,-0.013  
3,156.791,rs6440691,-0.011  
3,156.859,rs6766256,-0.016  
3,157.056,rs1220472,-0.016  
3,157.589,rs574445,-0.013  
3,157.600,rs4680029,-0.020  
3,157.611,rs3732753,-0.021  
3,157.624,rs2061201,-0.022  
3,157.643,rs12635944,-0.019  
3,157.651,rs13092829,-0.019  
3,157.665,rs9825721,-0.019  
3,157.682,rs16863118,-0.022  
3,157.691,rs7652387,-0.033  
3,157.693,rs1014691,-0.035  
3,157.697,rs6763580,-0.035  
3,157.743,rs358953,-0.031  
3,157.795,rs970235,-0.032  
3,157.819,rs12636173,-0.032  
3,157.861,rs1431494,-0.034  
3,157.907,rs2870518,-0.037  
3,157.947,rs7653603,-0.037  
3,158.077,rs3821665,-0.029  
3,158.079,rs11714493,-0.029  
3,158.195,rs7631760,-0.052  
3,158.241,rs6783939,-0.066  
3,158.258,rs16863517,-0.071  
3,158.266,rs1915717,-0.090  
3,158.341,rs991866,-0.094  
3,158.375,rs1401961,-0.100  
3,158.459,rs6440788,-0.114  
3,158.486,rs9823831,-0.096  
3,158.529,rs12489140,-0.094  
3,158.786,rs2898579,-0.087  
3,158.844,rs842497,-0.083  
3,159.301,rs323623,-0.039  
3,159.630,rs13079208,-0.026  
3,159.807,rs1434794,-0.023  
3,160.113,rs1350794,-0.024  
3,160.244,rs701265,-0.021  
3,160.335,rs12632803,-0.023  
3,160.424,rs1533913,-0.021  
3,160.460,rs9814144,-0.030  
3,160.463,rs701248,-0.041  
3,160.543,rs16822433,-0.054  
3,160.544,rs6440853,-0.055  
3,160.579,rs7355869,-0.077  
3,160.600,rs12629639,-0.074  
3,160.607,rs6764891,-0.060  
3,160.612,rs2221582,-0.066

3,160.622,rs6778259,-0.064  
3,160.653,rs6794116,-0.059  
3,160.688,rs11920638,-0.059  
3,160.705,rs3732619,-0.057  
3,160.731,rs958322,-0.053  
3,160.747,rs1388008,-0.046  
3,160.764,rs11920558,-0.052  
3,160.821,rs6806502,-0.054  
3,160.828,rs13321012,-0.055  
3,160.934,rs16822993,-0.060  
3,161.044,rs10935945,-0.066  
3,161.151,rs1032844,-0.083  
3,161.247,rs482953,-0.102  
3,161.430,rs1524538,-0.151  
3,161.816,rs386893,-0.181  
3,161.937,rs2689326,-0.181  
3,161.947,rs2136837,-0.184  
3,162.035,rs7629954,-0.233  
3,162.042,rs11915244,-0.234  
3,162.173,rs7629959,-0.242  
3,162.265,rs6440961,-0.308  
3,162.328,rs1525865,-0.357  
3,162.353,rs7623854,-0.266  
3,162.378,rs7643334,-0.224  
3,162.408,rs989692,-0.193  
3,162.418,rs968628,-0.157  
3,162.426,rs1025192,-0.150  
3,162.473,rs701109,-0.146  
3,162.561,rs6803323,-0.200  
3,162.571,rs6440972,-0.207  
3,162.588,rs6440975,-0.208  
3,162.595,rs4600855,-0.189  
3,162.685,rs7637342,-0.197  
3,162.727,rs359571,-0.212  
3,162.817,rs13067477,-0.247  
3,162.825,rs819849,-0.250  
3,162.832,rs10936023,-0.253  
3,162.964,rs4680239,-0.281  
3,163.061,rs13082914,-0.282  
3,163.087,rs1874952,-0.345  
3,163.195,rs1357432,-0.367  
3,163.199,rs11917301,-0.369  
3,163.236,rs7644005,-0.385  
3,163.262,rs17239426,-0.378  
3,163.272,rs4680277,-0.375  
3,163.468,rs10513495,-0.416  
3,163.667,rs10936043,-0.471  
3,163.738,rs9990369,-0.485  
3,163.756,rs16827204,-0.484  
3,163.937,rs4680353,-0.461  
3,164.383,rs939114,-0.387  
3,164.673,rs391398,-0.340  
3,164.686,rs340241,-0.330  
3,164.694,rs992089,-0.313  
3,164.708,rs9863735,-0.285  
3,164.711,rs7610202,-0.284  
3,164.712,rs12494264,-0.284  
3,164.728,rs10513534,-0.246  
3,164.756,rs1962071,-0.258  
3,164.824,rs16830368,-0.305  
3,164.845,rs9870894,-0.342



3,164.848,rs1387696,-0.352  
3,164.854,rs11710258,-0.369  
3,164.862,rs12108170,-0.357  
3,164.904,rs4602438,-0.297  
3,164.910,rs719070,-0.293  
3,164.934,rs7640429,-0.278  
3,164.946,rs6785153,-0.281  
3,164.959,rs550662,-0.283  
3,164.974,rs6441284,-0.288  
3,164.980,rs2647926,-0.290  
3,165.003,rs1498737,-0.299  
3,165.042,rs16831149,-0.296  
3,165.125,rs4680588,-0.283  
3,165.190,rs7641978,-0.290  
3,165.194,rs17505069,-0.290  
3,165.288,rs4390979,-0.296  
3,165.934,rs13083229,-0.339  
3,166.143,rs16832858,-0.373  
3,166.144,rs6441392,-0.373  
3,166.208,rs1515730,-0.412  
3,166.222,rs1436740,-0.420  
3,166.228,rs10936248,-0.424  
3,166.239,rs1115517,-0.409  
3,166.248,rs16833700,-0.397  
3,166.252,rs4093549,-0.391  
3,166.278,rs9838303,-0.426  
3,166.279,rs6778276,-0.428  
3,166.301,rs4425278,-0.458  
3,166.342,rs6804961,-0.439  
3,166.349,rs7609974,-0.436  
3,166.378,rs12496424,-0.435  
3,166.379,rs6798308,-0.435  
3,166.387,rs9823100,-0.434  
3,166.395,rs7340714,-0.433  
3,166.448,rs11917604,-0.425  
3,166.453,rs6441449,-0.428  
3,166.503,rs13083177,-0.459  
3,166.513,rs6804879,-0.465  
3,166.596,rs16855005,-0.469  
3,166.601,rs9860284,-0.470  
3,166.667,rs843057,-0.434  
3,166.728,rs9283631,-0.401  
3,166.762,rs4855274,-0.384  
3,166.770,rs7622802,-0.382  
3,166.785,rs9825896,-0.374  
3,166.971,rs13098760,-0.267  
3,167.018,rs9849665,-0.245  
3,167.198,rs4557160,-0.186  
3,167.209,rs9283633,-0.184  
3,167.243,rs11928265,-0.185  
3,167.270,rs1525383,-0.192  
3,167.304,rs10513615,-0.199  
3,167.319,rs4452350,-0.184  
3,167.343,rs7432504,-0.160  
3,167.434,rs1438578,-0.162  
3,167.452,rs2872065,-0.162  
3,167.457,rs7632669,-0.163  
3,167.574,rs6801797,-0.148  
3,167.683,rs7648668,-0.135  
3,167.734,rs13062144,-0.152  
3,167.756,rs1916286,-0.148

3,167.819,rs1356768,-0.137  
3,167.888,rs7648776,-0.115  
3,167.930,rs10451920,-0.103  
3,167.947,rs9878131,-0.100  
3,167.959,rs1464634,-0.099  
3,167.969,rs9869341,-0.099  
3,168.026,rs6788437,-0.099  
3,168.105,rs11921535,-0.103  
3,168.179,rs6763376,-0.134  
3,168.201,rs972730,-0.138  
3,168.228,rs7631039,-0.151  
3,168.262,rs7639014,-0.166  
3,168.298,rs4345115,-0.152  
3,168.327,rs6807050,-0.200  
3,168.333,rs6444798,-0.204  
3,168.334,rs6767716,-0.205  
3,168.485,rs865772,-0.187  
3,168.501,rs884828,-0.186  
3,168.512,rs2053021,-0.187  
3,168.518,rs13091735,-0.188  
3,168.520,rs3911093,-0.189  
3,168.744,rs9809990,-0.378  
3,168.823,rs3863100,-0.362  
3,168.903,rs10513664,-0.338  
3,168.911,rs6444848,-0.336  
3,168.913,rs4955642,-0.370  
3,168.930,rs9290362,-0.362  
3,168.941,rs3851384,-0.358  
3,169.057,rs1430435,-0.310  
3,169.116,rs9814713,-0.309  
3,169.147,rs13318214,-0.307  
3,169.151,rs10513667,-0.307  
3,169.198,rs4245909,-0.309  
3,169.212,rs12632583,-0.302  
3,169.214,rs17559919,-0.304  
3,169.236,rs7652987,-0.326  
3,169.257,rs7638569,-0.327  
3,169.329,rs16854053,-0.341  
3,169.351,rs721808,-0.345  
3,169.435,rs7626686,-0.366  
3,169.456,rs933605,-0.368  
3,169.489,rs2421748,-0.365  
3,169.814,rs7647589,-0.369  
3,169.836,rs7628292,-0.356  
3,169.867,rs16854522,-0.338  
3,169.907,rs1290670,-0.350  
3,170.067,rs10936619,-0.411  
3,170.077,rs546950,-0.414  
3,170.185,rs9875109,-0.456  
3,170.275,rs6789670,-0.460  
3,170.280,rs7647823,-0.460  
3,170.309,rs3732448,-0.449  
3,170.347,rs11924505,-0.445  
3,170.351,rs9880460,-0.444  
3,170.446,rs6787400,-0.463  
3,170.518,rs479645,-0.481  
3,170.589,rs12485248,-0.487  
3,170.624,rs4955756,-0.413  
3,170.665,rs6792607,-0.415  
3,170.810,rs16855718,-0.400  
3,170.844,rs16855813,-0.401

3,170.850,rs9789980,-0.401  
3,170.894,rs6444967,-0.404  
3,170.935,rs11716192,-0.392  
3,170.947,rs1124184,-0.388  
3,170.973,rs9819421,-0.401  
3,170.993,rs2035913,-0.404  
3,171.047,rs9824791,-0.410  
3,171.065,rs902952,-0.396  
3,171.067,rs4894425,-0.401  
3,171.071,rs9811628,-0.416  
3,171.073,rs882172,-0.423  
3,171.078,rs9290412,-0.425  
3,171.096,rs10936685,-0.427  
3,171.112,rs721912,-0.470  
3,171.134,rs10936689,-0.506  
3,171.166,rs6445008,-0.548  
3,171.186,rs2160992,-0.578  
3,171.213,rs83616,-0.614  
3,171.238,rs7634685,-0.699  
3,171.353,rs13092828,-0.792  
3,171.362,rs7652788,-0.793  
3,171.363,rs9830035,-0.793  
3,171.398,rs3850193,-0.854  
3,171.459,rs472728,-0.845  
3,171.488,rs559235,-0.752  
3,171.570,rs4894803,-0.667  
3,171.654,rs6763884,-0.676  
3,171.696,rs9825202,-0.693  
3,171.747,rs4894819,-0.713  
3,171.883,rs13094089,-0.784  
3,171.923,rs4894535,-0.799  
3,171.936,rs9838734,-0.794  
3,171.987,rs6773689,-0.760  
3,172.014,rs7642511,-0.764  
3,172.019,rs2172839,-0.764  
3,172.089,rs660239,-0.751  
3,172.096,rs4894544,-0.744  
3,172.127,rs9810131,-0.692  
3,172.152,rs519352,-0.648  
3,172.238,rs9819506,-0.689  
3,172.320,rs2041693,-0.688  
3,172.358,rs231983,-0.687  
3,172.378,rs11925997,-0.684  
3,172.419,rs3843973,-0.673  
3,172.425,rs231998,-0.674  
3,172.476,rs11918360,-0.606  
3,172.512,rs9872004,-0.596  
3,172.546,rs234025,-0.585  
3,172.597,rs6778941,-0.621  
3,172.603,rs17756228,-0.630  
3,172.645,rs497316,-0.577  
3,172.649,rs483772,-0.582  
3,172.662,rs494694,-0.591  
3,172.892,rs11919648,-0.616  
3,172.951,rs7433573,-0.622  
3,172.972,rs13066810,-0.625  
3,173.148,rs9864296,-0.607  
3,173.170,rs9876188,-0.599  
3,173.246,rs791832,-0.567  
3,173.341,rs7620311,-0.503  
3,173.481,rs10460879,-0.454

3,173.690,rs792128,-0.437  
3,173.713,rs9290468,-0.420  
3,173.756,rs9840933,-0.390  
3,173.771,rs705041,-0.400  
3,173.786,rs1392120,-0.416  
3,173.832,rs1402216,-0.412  
3,173.973,rs532021,-0.399  
3,173.976,rs605211,-0.399  
3,174.390,rs247968,-0.371  
3,174.475,rs3774047,-0.375  
3,174.513,rs17178976,-0.384  
3,174.631,rs9868927,-0.409  
3,174.650,rs6801163,-0.414  
3,174.847,rs9827076,-0.397  
3,174.964,rs959148,-0.383  
3,175.153,rs1387004,-0.380  
3,175.877,rs13097226,-0.352  
3,176.073,rs6792822,-0.348  
3,176.133,rs6789981,-0.348  
3,176.195,rs291928,-0.348  
3,176.753,rs11919911,-0.349  
3,177.152,rs1421425,-0.351  
3,177.289,rs811197,-0.363  
3,177.343,rs7610632,-0.320  
3,177.345,rs7620258,-0.320  
3,177.395,rs9830993,-0.310  
3,177.469,rs9290503,-0.280  
3,177.500,rs13084517,-0.267  
3,177.524,rs10936812,-0.275  
3,177.565,rs552008,-0.290  
3,177.619,rs538340,-0.303  
3,177.645,rs6445183,-0.302  
3,177.678,rs6767604,-0.291  
3,177.746,rs10513729,-0.294  
3,177.820,rs9880874,-0.288  
3,177.826,rs4452337,-0.286  
3,177.828,rs9823658,-0.283  
3,177.882,rs1461272,-0.346  
3,177.899,rs9849745,-0.341  
3,177.965,rs12633712,-0.314  
3,178.021,rs6443300,-0.306  
3,178.086,rs9879950,-0.291  
3,178.119,rs6799976,-0.294  
3,178.257,rs4894713,-0.316  
3,178.277,rs2161044,-0.313  
3,178.285,rs9821455,-0.333  
3,178.286,rs10490874,-0.336  
3,178.291,rs7629234,-0.348  
3,178.306,rs16825529,-0.385  
3,178.371,rs7643142,-0.357  
3,178.382,rs6774177,-0.351  
3,178.420,rs9815671,-0.382  
3,178.544,rs6443305,-0.371  
3,178.555,rs7628569,-0.371  
3,178.583,rs10513733,-0.370  
3,178.976,rs1931156,-0.381  
3,178.990,rs1931164,-0.381  
3,179.011,rs2184207,-0.404  
3,179.018,rs2184212,-0.380  
3,179.042,rs4386512,-0.383  
3,179.244,rs9815577,-0.392

3,179.247,rs9884045,-0.393  
3,179.265,rs9823496,-0.394  
3,179.266,rs9824424,-0.395  
3,179.284,rs9859162,-0.394  
3,179.349,rs1320287,-0.396  
3,179.457,rs7653056,-0.403  
3,179.680,rs1921476,-0.379  
3,179.828,rs5008411,-0.370  
3,180.030,rs6778967,-0.379  
3,180.172,rs9878774,-0.361  
3,180.209,rs1377820,-0.347  
3,180.239,rs9917710,-0.347  
3,180.261,rs2862481,-0.345  
3,180.297,rs7641922,-0.339  
3,180.355,rs838209,-0.329  
3,180.403,rs9815008,-0.328  
3,180.457,rs1490070,-0.327  
3,180.544,rs1490054,-0.326  
3,180.557,rs6778657,-0.293  
3,180.638,rs1906658,-0.289  
3,180.696,rs2902280,-0.280  
3,180.735,rs13097413,-0.273  
3,180.764,rs4274761,-0.251  
3,180.765,rs6784900,-0.250  
3,180.795,rs6443423,-0.232  
3,180.900,rs1681655,-0.250  
3,180.936,rs1201296,-0.257  
3,181.039,rs3923106,-0.296  
3,181.158,rs9840651,-0.322  
3,181.165,rs6443448,-0.323  
3,181.184,rs12629106,-0.327  
3,181.202,rs7374825,-0.329  
3,181.212,rs6766374,-0.323  
3,181.238,rs1995243,-0.303  
3,181.261,rs7632844,-0.268  
3,181.280,rs17631673,-0.295  
3,181.323,rs1499880,-0.288  
3,181.344,rs10470510,-0.289  
3,181.420,rs2133600,-0.304  
3,181.481,rs10513748,-0.293  
3,181.559,rs1369569,-0.360  
3,181.588,rs9861373,-0.387  
3,181.611,rs1561030,-0.439  
3,181.762,rs9817294,-0.352  
3,181.812,rs7634528,-0.373  
3,181.862,rs16829067,-0.393  
3,181.895,rs9828139,-0.405  
3,182.169,rs9854383,-0.498  
3,182.405,rs282880,-0.496  
3,182.433,rs9290646,-0.533  
3,182.744,rs9847335,-0.570  
3,182.768,rs9856750,-0.572  
3,182.920,rs9839376,-0.590  
3,182.982,rs12634309,-0.594  
3,183.062,rs6809208,-0.583  
3,183.670,rs7645550,-0.496  
3,183.687,rs6443636,-0.489  
3,183.711,rs6805876,-0.482  
3,183.758,rs2287208,-0.451  
3,183.771,rs7622921,-0.474  
3,183.778,rs6807740,-0.486

3,183.788,rs2339802,-0.504  
3,183.796,rs10513760,-0.452  
3,183.800,rs2077675,-0.444  
3,183.830,rs2339844,-0.461  
3,183.855,rs9874079,-0.477  
3,183.873,rs4854948,-0.515  
3,183.898,rs2287240,-0.538  
3,183.922,rs4855113,-0.535  
3,183.986,rs7623941,-0.548  
3,183.991,rs4855129,-0.534  
3,184.022,rs9828621,-0.541  
3,184.036,rs1568554,-0.549  
3,184.298,rs9823620,-0.681  
3,184.482,rs869889,-0.754  
3,184.662,rs6443721,-0.825  
3,184.664,rs16832027,-0.829  
3,184.701,rs13067678,-0.882  
3,184.705,rs9838828,-0.881  
3,184.744,rs9847533,-0.862  
3,184.930,rs12635178,-0.759  
3,184.977,rs7610679,-0.748  
3,185.001,rs11923857,-0.743  
3,185.013,rs7618962,-0.743  
3,185.027,rs6800987,-0.777  
3,185.061,rs11922688,-0.845  
3,185.094,rs13096015,-0.793  
3,185.176,rs4855069,-0.806  
3,185.231,rs1435959,-0.814  
3,185.311,rs6443778,-0.777  
3,185.450,rs9836621,-0.732  
3,185.536,rs9880110,-0.723  
3,185.556,rs13079695,-0.684  
3,185.593,rs9813493,-0.677  
3,185.618,rs3843881,-0.706  
3,185.645,rs9817590,-0.695  
3,185.671,rs2717302,-0.682  
3,185.761,rs10937101,-0.731  
3,185.986,rs4859156,-0.854  
3,186.053,rs472795,-0.876  
3,186.058,rs684174,-0.877  
3,186.082,rs4859159,-0.894  
3,186.139,rs7634425,-0.931  
3,186.142,rs1496802,-0.931  
3,186.179,rs7620788,-0.831  
3,186.191,rs11719987,-0.809  
3,186.195,rs10937128,-0.801  
3,186.197,rs4859178,-0.799  
3,186.230,rs4859188,-0.892  
3,186.268,rs11919592,-0.950  
3,186.275,rs1879784,-0.960  
3,186.277,rs16857664,-0.959  
3,186.309,rs2056324,-0.924  
3,186.331,rs4066034,-0.870  
3,186.337,rs4859121,-0.913  
3,186.348,rs9824873,-0.833  
3,186.411,rs9825921,-0.882  
3,186.416,rs17621407,-0.882  
3,186.554,rs6809370,-0.894  
3,186.634,rs562,-0.892  
3,186.883,rs12493550,-0.871  
3,186.931,rs6766410,-0.857

3,187.079,rs6806377,-0.797  
3,187.174,rs2175525,-0.917  
3,187.203,rs843367,-0.939  
3,187.411,rs3752904,-0.887  
3,187.504,rs4912537,-0.872  
3,187.608,rs4912486,-0.837  
3,187.620,rs10513797,-0.830  
3,187.757,rs7429010,-0.702  
3,187.762,rs6806701,-0.698  
3,187.814,rs9844738,-0.674  
3,187.828,rs6777648,-0.662  
3,187.879,rs13096649,-0.647  
3,187.888,rs3930233,-0.645  
3,187.900,rs7433081,-0.642  
3,187.992,rs11720282,-0.632  
3,188.097,rs4582031,-0.609  
3,188.120,rs10937179,-0.595  
3,188.131,rs9849690,-0.586  
3,188.250,rs9846698,-0.451  
3,188.346,rs10937186,-0.406  
3,188.369,rs4687478,-0.408  
3,188.386,rs9844571,-0.391  
3,188.418,rs16859163,-0.403  
3,188.429,rs6766579,-0.395  
3,188.437,rs6786156,-0.393  
3,188.473,rs2377102,-0.364  
3,188.480,rs10513798,-0.358  
3,188.485,rs12152460,-0.354  
3,188.503,rs4686407,-0.337  
3,188.510,rs17220361,-0.337  
3,189.073,rs6765837,-0.337  
3,189.277,rs11714089,-0.328  
3,189.361,rs3774051,-0.308  
3,189.554,rs9866735,-0.246  
3,189.589,rs6444068,-0.238  
3,189.647,rs9832000,-0.241  
3,189.678,rs13091808,-0.255  
3,189.719,rs9790230,-0.273  
3,189.773,rs17826752,-0.280  
3,189.861,rs7638853,-0.278  
3,190.055,rs7619232,-0.283  
3,190.078,rs1470579,-0.284  
3,190.119,rs4634163,-0.307  
3,190.123,rs6776536,-0.396  
3,190.155,rs741604,-0.332  
3,190.232,rs2251407,-0.326  
3,190.244,rs4686400,-0.326  
3,190.258,rs6444089,-0.309  
3,190.280,rs13065531,-0.298  
3,190.292,rs6768604,-0.295  
3,190.510,rs7433760,-0.221  
3,190.693,rs11924144,-0.194  
3,190.706,rs4686734,-0.193  
3,190.891,rs9815931,-0.184  
3,190.897,rs1400360,-0.186  
3,190.933,rs12492576,-0.254  
3,190.937,rs2284838,-0.262  
3,190.944,rs4686753,-0.274  
3,190.945,rs9968130,-0.276  
3,190.970,rs2268833,-0.272  
3,190.974,rs1014695,-0.276

3,190.983,rs1541614,-0.274  
3,190.993,rs3819863,-0.254  
3,191.000,rs9870928,-0.236  
3,191.011,rs2239624,-0.226  
3,191.016,rs2268817,-0.222  
3,191.037,rs1981783,-0.194  
3,191.064,rs7618021,-0.192  
3,191.072,rs9839753,-0.183  
3,191.074,rs7432284,-0.182  
3,191.081,rs9821408,-0.176  
3,191.092,rs12496426,-0.184  
3,191.150,rs6798365,-0.200  
3,191.163,rs7610178,-0.202  
3,191.165,rs4374519,-0.200  
3,191.192,rs1868143,-0.216  
3,191.196,rs6778486,-0.216  
3,191.264,rs8147,-0.235  
3,191.295,rs2070633,-0.214  
3,191.337,rs9824398,-0.196  
3,191.382,rs11918289,-0.184  
3,191.393,rs1656922,-0.197  
3,191.397,rs266723,-0.202  
3,191.412,rs6807774,-0.206  
3,191.460,rs843991,-0.243  
3,191.490,rs10937273,-0.210  
3,191.496,rs822387,-0.211  
3,191.510,rs3821799,-0.213  
3,191.537,rs2117986,-0.208  
3,191.588,rs2889789,-0.130  
3,191.596,rs3887925,-0.117  
3,191.598,rs10513809,-0.115  
3,191.619,rs6766574,-0.093  
3,191.623,rs3864108,-0.100  
3,191.638,rs6444192,-0.125  
3,191.652,rs3872722,-0.170  
3,191.667,rs4686838,-0.175  
3,191.679,rs6444196,-0.173  
3,191.690,rs16861549,-0.172  
3,191.705,rs12054151,-0.171  
3,191.718,rs4686849,-0.176  
3,191.740,rs10490807,-0.180  
3,191.747,rs270161,-0.180  
3,191.754,rs6798581,-0.181  
3,191.855,rs6444210,-0.191  
3,191.861,rs11916885,-0.191  
3,191.913,rs1001073,-0.192  
3,191.927,rs874603,-0.226  
3,191.938,rs3815623,-0.253  
3,191.972,rs850309,-0.229  
3,192.011,rs698104,-0.233  
3,192.044,rs12492885,-0.236  
3,192.048,rs710475,-0.271  
3,192.128,rs751396,-0.269  
3,192.133,rs16861986,-0.267  
3,192.159,rs9028,-0.255  
3,192.178,rs2378246,-0.255  
3,192.276,rs7637064,-0.264  
3,192.313,rs16862163,-0.253  
3,192.360,rs6807004,-0.239  
3,192.382,rs11916826,-0.223  
3,192.426,rs2553991,-0.206



3,192.478,rs1452193,-0.215  
3,192.585,rs1452182,-0.223  
3,192.758,rs10513818,-0.214  
3,193.159,rs1005099,-0.189  
3,193.408,rs2378341,-0.212  
3,193.828,rs12107492,-0.237  
3,193.993,rs6444265,-0.250  
3,194.044,rs1157840,-0.254  
3,194.074,rs1903216,-0.256  
3,194.242,rs498688,-0.232  
3,194.255,rs6777331,-0.229  
3,194.410,rs4686917,-0.205  
3,194.635,rs6783007,-0.194  
3,194.688,rs2037184,-0.217  
3,194.705,rs9821867,-0.214  
3,194.747,rs6444269,-0.225  
3,194.877,rs9852144,-0.252  
3,194.930,rs4686935,-0.266  
3,195.022,rs1711001,-0.295  
3,195.028,rs1679195,-0.294  
3,195.073,rs344961,-0.283  
3,195.206,rs7645376,-0.247  
3,195.297,rs6777135,-0.204  
3,195.425,rs6784029,-0.166  
3,195.488,rs9830100,-0.155  
3,195.702,rs4686952,-0.122  
3,195.788,rs9817266,-0.087  
3,195.864,rs13076312,-0.071  
3,196.000,rs972338,-0.054  
3,196.008,rs6444286,-0.053  
3,196.116,rs9851525,-0.041  
3,196.200,rs12492561,-0.040  
3,196.233,rs3732913,-0.028  
3,196.335,rs2162261,-0.016  
3,196.438,rs16863396,-0.016  
3,196.505,rs2081550,-0.016  
3,196.669,rs2037121,-0.026  
3,196.688,rs1515424,-0.037  
3,196.719,rs4686980,-0.036  
3,196.818,rs1059380,-0.046  
3,196.819,rs3732909,-0.046  
3,197.036,rs12485376,-0.022  
3,197.098,rs11710948,-0.021  
3,197.130,rs7623253,-0.020  
3,197.227,rs17614714,-0.015  
3,197.304,rs925564,-0.013  
3,197.355,rs3732908,-0.008  
3,197.419,rs3817462,-0.004  
3,197.467,rs7623540,-0.003  
3,197.616,rs4686998,-0.003  
3,197.618,rs3901459,-0.003  
3,197.666,rs989455,-0.000  
3,197.690,rs3796283,-0.000  
3,197.720,rs4687002,0.000  
3,197.800,rs6444341,0.000  
3,197.970,rs3914986,-0.000  
3,198.040,rs2378469,-0.000  
3,198.132,rs4686507,-0.000  
3,198.220,rs9820421,-0.001  
3,198.232,rs6777676,-0.001  
3,198.365,rs6769057,-0.008

3,198.399,rs6784306,-0.009  
3,198.420,rs1055152,-0.003  
3,198.433,rs6793853,-0.002  
3,198.461,rs1399615,-0.006  
3,198.531,rs182009,-0.009  
3,198.602,rs7639459,-0.013  
3,198.857,rs6771859,-0.029  
3,198.897,rs3846206,-0.029  
3,199.366,rs10513838,-0.024  
3,199.604,rs3856776,-0.023  
3,199.615,rs6787246,-0.022  
3,199.685,rs6790258,-0.012  
3,199.773,rs7649341,-0.005  
3,199.852,rs4687090,-0.004  
3,199.877,rs6777607,-0.008  
3,199.914,rs9851375,-0.006  
3,199.943,rs9824061,-0.006  
3,199.949,rs9830137,-0.005  
3,200.007,rs1464117,-0.007  
3,200.036,rs1515495,-0.008  
3,200.068,rs7619549,-0.008  
3,200.123,rs9881595,-0.014  
3,200.183,rs7619556,-0.013  
3,200.226,rs9817981,-0.020  
3,200.367,rs12107036,-0.033  
3,200.474,rs7642848,-0.024  
3,200.644,rs696066,-0.027  
3,200.671,rs16864907,-0.028  
3,200.922,rs967119,-0.032  
3,201.169,rs710580,-0.043  
3,201.224,rs16865070,-0.047  
3,201.272,rs710595,-0.050  
3,201.433,rs3098262,-0.042  
3,201.460,rs536435,-0.043  
3,201.734,rs9811462,-0.046  
3,201.959,rs9878318,-0.049  
3,202.014,rs10513846,-0.077  
3,202.018,rs6809685,-0.078  
3,202.026,rs3774023,-0.073  
3,202.047,rs6781278,-0.063  
3,202.331,rs9851374,-0.078  
3,202.388,rs3943979,-0.083  
3,202.469,rs9864293,-0.062  
3,202.531,rs9290935,-0.069  
3,202.588,rs2361832,-0.080  
3,202.593,rs3773990,-0.079  
3,202.602,rs3773989,-0.079  
3,202.640,rs4687150,-0.070  
3,202.672,rs10937439,-0.070  
3,202.710,rs7628250,-0.083  
3,202.750,rs4571225,-0.079  
3,202.815,rs7626795,-0.076  
3,203.062,rs7617445,-0.057  
3,203.070,rs6775728,-0.062  
3,203.090,rs9290953,-0.072  
3,203.112,rs9682599,-0.112  
3,203.113,rs7636699,-0.107  
3,203.116,rs12634559,-0.090  
3,203.125,rs9818981,-0.081  
3,203.140,rs16865983,-0.088  
3,203.178,rs1501602,-0.087

3,203.292,rs2363970,-0.089  
3,203.303,rs13100749,-0.090  
3,203.410,rs9857505,-0.087  
3,203.446,rs7637404,-0.084  
3,203.515,rs150503,-0.077  
3,203.641,rs4677728,-0.060  
3,203.730,rs9290987,-0.049  
3,203.840,rs4234621,-0.040  
3,203.848,rs12498025,-0.029  
3,203.850,rs2090721,-0.030  
3,203.868,rs12633186,-0.037  
3,203.874,rs11922996,-0.039  
3,203.944,rs1405037,-0.039  
3,204.026,rs4686582,-0.039  
3,204.177,rs9837138,-0.048  
3,204.313,rs709113,-0.059  
3,204.372,rs11711997,-0.051  
3,204.382,rs11929015,-0.052  
3,204.484,rs12635936,-0.064  
3,204.547,rs6444592,-0.071  
3,204.552,rs7621589,-0.087  
3,204.604,rs7635839,-0.082  
3,204.626,rs2669973,-0.080  
3,204.697,rs2087698,-0.080  
3,204.726,rs1491520,-0.086  
3,204.768,rs6784780,-0.096  
3,204.868,rs2951798,-0.126  
3,204.957,rs6774732,-0.141  
3,204.996,rs10937534,-0.148  
3,205.054,rs975121,-0.151  
3,205.396,rs7641260,-0.177  
3,205.570,rs12487104,-0.277  
3,205.715,rs1525910,-0.261  
3,205.777,rs2686464,-0.204  
3,205.806,rs884309,-0.197  
3,205.906,rs12107377,-0.186  
3,205.974,rs6775137,-0.225  
3,206.272,rs9843820,-0.163  
3,206.475,rs1532684,-0.163  
3,206.502,rs781415,-0.157  
3,206.612,rs905566,-0.138  
3,206.685,rs2701588,-0.123  
3,206.816,rs1995472,-0.106  
3,206.897,rs1995574,-0.123  
3,206.997,rs1505440,-0.159  
3,207.043,rs2986,-0.180  
3,207.139,rs2367129,-0.212  
3,207.166,rs11716856,-0.209  
3,207.167,rs4455277,-0.209  
3,207.378,rs1157623,-0.161  
3,207.403,rs9855714,-0.153  
3,207.548,rs4686626,-0.143  
3,207.557,rs922331,-0.142  
3,207.756,rs10428211,-0.148  
3,207.857,rs2367477,-0.145  
3,207.952,rs4687402,-0.151  
3,208.016,rs951016,-0.155  
3,208.060,rs2280476,-0.158  
3,208.064,rs10439973,-0.159  
3,208.084,rs6763501,-0.161  
3,208.177,rs9879227,-0.170

3,208.312,rs9283663,-0.171  
3,208.577,rs7624750,-0.145  
3,208.784,rs280552,-0.148  
3,208.871,rs904879,-0.104  
3,208.889,rs6444746,-0.095  
3,208.947,rs533857,-0.056  
3,209.020,rs7629215,-0.031  
3,209.052,rs968861,-0.024  
3,209.114,rs13324043,-0.013  
3,209.169,rs4686653,-0.012  
3,209.205,rs1872542,-0.001  
3,209.215,rs11914434,-0.000  
3,209.256,rs9855415,0.004  
3,209.269,rs6770661,0.005  
3,209.273,rs1472075,0.006  
3,209.293,rs7641641,0.008  
3,209.322,rs1078814,0.004  
3,209.388,rs1490752,-0.003  
3,209.507,rs6796696,-0.062  
3,209.516,rs6444771,-0.067  
3,209.582,rs2368046,-0.090  
3,209.603,rs7632519,-0.102  
3,209.622,rs4532075,-0.112  
3,209.660,rs9858096,-0.101  
3,209.684,rs4613405,-0.100  
3,209.696,rs7647261,-0.099  
3,209.749,rs6778204,-0.141  
3,209.753,rs9811548,-0.142  
3,209.783,rs10933727,-0.127  
3,209.840,rs11922293,-0.096  
3,209.858,rs6785704,-0.090  
3,209.865,rs11928683,-0.088  
3,209.937,rs12629557,-0.068  
3,209.949,rs3732477,-0.051  
3,209.987,rs6789870,-0.037  
3,209.998,rs923931,-0.037  
3,210.023,rs7642341,-0.039  
3,210.282,rs6437379,-0.037  
3,210.291,rs2153519,-0.037  
3,210.344,rs9862208,-0.045  
3,210.411,rs705298,-0.058  
3,210.446,rs938087,-0.061  
3,210.455,rs7620693,-0.081  
3,210.489,rs7621704,-0.098  
3,210.517,rs2898610,-0.102  
3,210.721,rs1077729,-0.129  
3,210.768,rs2126305,-0.130  
3,210.885,rs4677743,-0.139  
3,210.969,rs4488776,-0.117  
3,210.994,rs9860061,-0.123  
3,211.014,rs4677760,-0.116  
3,211.027,rs753628,-0.112  
3,211.071,rs11719165,-0.119  
3,211.089,rs10933683,-0.121  
3,211.220,rs878809,-0.110  
3,211.244,rs3892715,-0.066  
3,211.266,rs10804418,-0.061  
3,211.309,rs952481,-0.049  
3,211.387,rs11719455,-0.039  
3,211.394,rs3796160,-0.040  
3,211.646,rs7633265,-0.063

3,212.804,rs823504,-0.025  
3,214.972,rs2688515,-0.006  
3,215.263,rs6800709,-0.009  
3,215.311,rs6806773,-0.009  
3,215.322,rs9858622,-0.006  
3,215.336,rs9844652,-0.004  
3,215.352,rs2278034,-0.004  
3,215.677,rs3817672,-0.018  
3,215.719,rs9990333,-0.029  
3,215.735,rs13080736,-0.026  
3,215.752,rs4075688,-0.023  
3,215.762,rs7625441,-0.022  
3,215.787,rs6765113,-0.019  
3,215.789,rs4927884,-0.019  
3,215.880,rs11185516,-0.016  
3,215.881,rs9812036,-0.016  
3,216.245,rs7374260,-0.008  
3,216.260,rs12631706,-0.007  
3,216.281,rs7639524,-0.008  
3,216.476,rs11185546,-0.019  
3,216.490,rs2014220,-0.016  
3,216.500,rs9843585,-0.014  
3,216.552,rs1385331,-0.024  
3,216.580,rs843522,-0.022  
3,216.590,rs6766451,-0.016  
3,216.605,rs4912589,-0.010  
3,216.619,rs1798628,-0.006  
3,216.632,rs13098826,-0.005  
3,216.680,rs2030534,-0.005  
3,216.729,rs3844057,-0.003  
3,216.798,rs9325377,-0.002  
3,217.056,rs548853,0.000  
3,217.066,rs4916589,0.000  
3,217.123,rs4916596,0.000  
3,217.560,rs9843659,-0.000  
3,217.673,rs7644221,-0.001  
3,217.712,rs6777317,-0.001  
3,217.721,rs768858,-0.001  
3,217.729,rs1018527,-0.001  
3,217.861,rs6772127,-0.000  
3,217.891,rs4857595,-0.000  
3,217.899,rs13099300,-0.000  
3,217.941,rs2567346,-0.000  
3,217.970,rs9813057,-0.000  
3,218.080,rs1549830,-0.001  
3,218.158,rs9841534,-0.002  
3,218.195,rs4857506,-0.002  
3,218.387,rs4508802,-0.002  
3,218.497,rs3205525,-0.002  
3,218.547,rs12107316,-0.001  
3,218.625,rs11928427,-0.000  
3,218.634,rs11717776,-0.002  
3,218.957,rs13327370,-0.001  
3,219.015,rs4030334,0.000  
3,219.023,rs12636087,0.000  
4,0.214,rs7665922,0.565  
4,0.385,rs6848983,0.573  
4,0.529,rs7695712,0.579  
4,0.688,rs1127410,0.585  
4,0.698,rs13149565,0.584  
4,0.950,rs4690296,0.534

4,0.969,rs17164972,0.523  
4,0.983,rs6810428,0.515  
4,1.027,rs7677766,0.493  
4,1.057,rs936551,0.490  
4,1.110,rs755447,0.484  
4,1.113,rs764324,0.484  
4,1.208,rs2290405,0.492  
4,1.285,rs748651,0.444  
4,1.295,rs4647932,0.445  
4,1.387,rs3796619,0.455  
4,1.428,rs7659054,0.444  
4,1.523,rs900030,0.411  
4,1.583,rs3755930,0.390  
4,1.635,rs11247980,0.371  
4,1.650,rs11727167,0.370  
4,1.758,rs10024529,0.374  
4,1.972,rs11947258,0.387  
4,2.002,rs6822351,0.393  
4,2.033,rs10050053,0.403  
4,2.098,rs6858080,0.376  
4,2.251,rs2854915,0.419  
4,2.356,rs743682,0.416  
4,2.450,rs4865483,0.405  
4,2.617,rs3135123,0.387  
4,2.628,rs550483,0.388  
4,2.972,rs7660498,0.455  
4,3.017,rs4974666,0.444  
4,3.053,rs17768393,0.450  
4,3.064,rs4974674,0.451  
4,3.104,rs3118617,0.405  
4,3.173,rs3135093,0.362  
4,3.237,rs1203764,0.297  
4,3.331,rs1203860,0.308  
4,3.683,rs4690060,0.346  
4,3.744,rs1751848,0.345  
4,3.760,rs1263446,0.346  
4,3.785,rs231395,0.380  
4,3.947,rs2515960,0.376  
4,4.270,rs2298969,0.407  
4,4.382,rs2798224,0.419  
4,4.386,rs16844106,0.418  
4,4.420,rs994426,0.414  
4,4.777,rs1406674,0.379  
4,4.837,rs762864,0.365  
4,4.951,rs16844364,0.328  
4,5.045,rs1203111,0.326  
4,5.159,rs6831256,0.318  
4,5.235,rs1881803,0.305  
4,5.353,rs3468,0.307  
4,5.471,rs1730775,0.310  
4,5.781,rs7699191,0.343  
4,5.964,rs16844952,0.320  
4,6.168,rs177798,0.280  
4,6.202,rs177766,0.294  
4,6.251,rs885797,0.294  
4,6.276,rs7377501,0.235  
4,6.307,rs445275,0.282  
4,6.317,rs4916612,0.309  
4,6.359,rs6822427,0.299  
4,6.563,rs3889790,0.308  
4,6.643,rs4974767,0.290

4,6.932,rs2920250,0.225  
4,7.029,rs2980098,0.228  
4,7.049,rs6835291,0.219  
4,7.176,rs7674400,0.187  
4,7.177,rs4279148,0.189  
4,7.179,rs4689340,0.191  
4,7.180,rs4478124,0.193  
4,7.184,rs12512085,0.205  
4,7.194,rs4305464,0.269  
4,7.198,rs3792686,0.281  
4,7.201,rs4555567,0.287  
4,7.320,rs4689888,0.329  
4,7.337,rs6446665,0.293  
4,7.338,rs4234835,0.293  
4,7.378,rs6830734,0.344  
4,7.393,rs7694788,0.314  
4,7.399,rs13149758,0.301  
4,7.411,rs7690052,0.259  
4,7.424,rs1000579,0.230  
4,7.426,rs1000578,0.229  
4,7.443,rs2172445,0.250  
4,7.458,rs6830371,0.214  
4,7.462,rs12186237,0.217  
4,7.482,rs2933573,0.230  
4,7.506,rs7666443,0.250  
4,7.522,rs3821949,0.267  
4,7.543,rs6817411,0.261  
4,7.547,rs2968686,0.260  
4,7.610,rs16836510,0.228  
4,7.709,rs4689967,0.200  
4,7.778,rs4392464,0.222  
4,7.808,rs6446309,0.236  
4,7.833,rs10937615,0.245  
4,7.899,rs11732574,0.261  
4,7.938,rs9799796,0.283  
4,7.977,rs1868047,0.310  
4,8.040,rs1447284,0.325  
4,8.112,rs6833812,0.329  
4,8.129,rs16836654,0.316  
4,8.149,rs6825132,0.302  
4,8.168,rs747224,0.280  
4,8.433,rs989707,0.260  
4,8.458,rs11731545,0.248  
4,8.470,rs1812310,0.246  
4,8.496,rs985222,0.243  
4,8.855,rs4689212,0.190  
4,9.029,rs739968,0.175  
4,9.053,rs2009157,0.173  
4,9.121,rs195098,0.168  
4,9.299,rs3774811,0.147  
4,9.376,rs16837352,0.139  
4,9.565,rs13113867,0.141  
4,9.655,rs13109991,0.130  
4,9.752,rs9993134,0.100  
4,9.816,rs10025465,0.082  
4,9.892,rs4689273,0.063  
4,9.967,rs7684327,0.044  
4,10.015,rs11725145,0.040  
4,10.070,rs2291157,0.038  
4,10.077,rs881686,0.038  
4,10.141,rs7674034,0.014

4,10.143,rs6414624,0.021  
4,10.143,rs1480169,0.020  
4,10.150,rs1871584,0.009  
4,10.172,rs3774861,0.011  
4,10.230,rs17747287,0.011  
4,10.353,rs7680768,0.013  
4,10.381,rs17748291,0.019  
4,10.386,rs11944616,0.020  
4,10.393,rs3774879,0.021  
4,10.457,rs13144677,0.025  
4,10.678,rs13146468,0.058  
4,10.707,rs4689294,0.062  
4,10.758,rs11727977,0.071  
4,10.761,rs17751160,0.071  
4,10.832,rs16837906,0.088  
4,10.927,rs10014397,0.135  
4,10.941,rs4689286,0.134  
4,10.974,rs7657266,0.128  
4,11.074,rs6819485,0.113  
4,11.174,rs17766228,0.116  
4,11.207,rs3901458,0.130  
4,11.224,rs6446452,0.126  
4,11.243,rs10516179,0.122  
4,11.329,rs11731332,0.101  
4,11.407,rs7687079,0.067  
4,11.416,rs4512066,0.056  
4,11.425,rs10017549,0.035  
4,11.465,rs4522943,0.013  
4,11.527,rs4688970,0.011  
4,11.606,rs4688973,0.015  
4,11.626,rs2137871,0.017  
4,11.649,rs4274923,0.021  
4,11.714,rs4688978,0.030  
4,11.727,rs13103694,0.027  
4,11.789,rs4689381,0.016  
4,11.977,rs10804976,0.022  
4,12.068,rs4689410,0.043  
4,12.081,rs6856061,0.031  
4,12.133,rs13124487,0.022  
4,12.187,rs4327561,0.018  
4,12.222,rs2240268,0.011  
4,12.256,rs7438559,0.006  
4,12.334,rs4345249,0.001  
4,12.495,rs4610412,0.001  
4,12.515,rs9654056,0.001  
4,12.577,rs4380587,0.002  
4,12.763,rs2301796,0.011  
4,12.843,rs11721430,0.014  
4,13.022,rs11736897,0.022  
4,13.200,rs4689510,0.029  
4,13.305,rs4493618,0.037  
4,13.466,rs16839178,0.063  
4,13.487,rs4689534,0.064  
4,13.536,rs4543114,0.068  
4,13.578,rs4689542,0.065  
4,13.621,rs4689050,0.060  
4,13.641,rs7681358,0.058  
4,13.643,rs4689545,0.057  
4,13.693,rs6854931,0.039  
4,13.995,rs6848312,0.035  
4,14.140,rs10022837,0.037



4,14.255,rs3901368,0.040  
4,14.323,rs4342189,0.060  
4,14.939,rs10937779,0.137  
4,15.351,rs11938388,0.206  
4,15.363,rs12647765,0.208  
4,15.431,rs10155062,0.213  
4,15.433,rs17807577,0.213  
4,15.448,rs4689066,0.215  
4,15.478,rs7687509,0.209  
4,15.478,rs3857190,0.209  
4,15.510,rs3901794,0.236  
4,15.614,rs4566655,0.252  
4,15.645,rs9999241,0.249  
4,15.694,rs6851506,0.244  
4,15.723,rs4689626,0.245  
4,15.869,rs12152570,0.225  
4,15.993,rs11931042,0.260  
4,16.052,rs905010,0.272  
4,16.070,rs9291133,0.275  
4,16.099,rs904989,0.307  
4,16.119,rs6845989,0.305  
4,16.123,rs6826089,0.302  
4,16.193,rs6814708,0.253  
4,16.210,rs12647543,0.254  
4,16.251,rs11946827,0.257  
4,16.359,rs11942816,0.262  
4,16.432,rs4689707,0.259  
4,16.449,rs3864202,0.259  
4,16.468,rs7657904,0.258  
4,16.503,rs16840080,0.258  
4,16.572,rs13110208,0.249  
4,16.622,rs17757615,0.247  
4,16.629,rs17814167,0.245  
4,16.695,rs3864210,0.247  
4,16.720,rs3864220,0.222  
4,16.814,rs16840236,0.179  
4,16.824,rs6830500,0.175  
4,16.895,rs4558873,0.187  
4,16.921,rs13105690,0.226  
4,16.924,rs7682286,0.227  
4,16.926,rs7663695,0.227  
4,16.946,rs9999662,0.226  
4,17.036,rs4689748,0.201  
4,17.069,rs4443286,0.192  
4,17.125,rs7694518,0.192  
4,17.156,rs7654086,0.192  
4,17.241,rs13353636,0.188  
4,17.263,rs17828052,0.188  
4,17.459,rs744355,0.182  
4,17.490,rs4429728,0.182  
4,17.512,rs10021708,0.188  
4,17.584,rs11721353,0.211  
4,17.703,rs7667548,0.249  
4,17.722,rs6858110,0.256  
4,17.778,rs10012347,0.265  
4,17.985,rs4689801,0.309  
4,18.052,rs4689148,0.317  
4,18.093,rs2158275,0.306  
4,18.148,rs2285789,0.300  
4,18.201,rs6810814,0.292  
4,18.221,rs10488964,0.286

4,18.235,rs6816649,0.279  
4,18.292,rs7697323,0.274  
4,18.314,rs16840826,0.269  
4,18.331,rs17381732,0.265  
4,18.403,rs2359630,0.203  
4,18.434,rs766008,0.205  
4,18.466,rs6816604,0.182  
4,18.467,rs2285781,0.182  
4,18.657,rs9968354,0.207  
4,18.913,rs6821044,0.222  
4,18.940,rs1106248,0.220  
4,18.951,rs6846245,0.219  
4,19.117,rs4689166,0.202  
4,19.686,rs4696833,0.169  
4,19.727,rs6824093,0.168  
4,19.767,rs4696709,0.167  
4,19.872,rs7677869,0.139  
4,19.896,rs4696662,0.132  
4,19.983,rs4696664,0.128  
4,20.020,rs4696729,0.129  
4,20.177,rs4696738,0.148  
4,20.264,rs4696669,0.147  
4,20.308,rs6829649,0.147  
4,20.331,rs6842276,0.147  
4,20.380,rs6447849,0.137  
4,20.493,rs4696758,0.161  
4,20.517,rs1878519,0.166  
4,20.595,rs4696765,0.166  
4,20.669,rs4422405,0.182  
4,20.711,rs4696769,0.155  
4,20.744,rs12506374,0.145  
4,20.832,rs10938694,0.139  
4,21.057,rs1712287,0.138  
4,21.087,rs1298145,0.138  
4,21.324,rs4696796,0.135  
4,21.337,rs4696812,0.130  
4,21.381,rs3796751,0.111  
4,21.483,rs3115397,0.086  
4,21.505,rs6447879,0.073  
4,21.517,rs3115378,0.084  
4,21.537,rs4235272,0.078  
4,21.580,rs9715724,0.066  
4,21.590,rs4696891,0.065  
4,21.607,rs7660783,0.062  
4,21.620,rs6817108,0.060  
4,21.647,rs10755200,0.057  
4,22.134,rs6858299,0.013  
4,22.295,rs13135278,0.012  
4,22.298,rs10049659,0.012  
4,22.551,rs10805346,0.016  
4,22.559,rs881971,0.015  
4,22.641,rs10012779,0.015  
4,22.730,rs11932627,0.013  
4,22.943,rs10939814,0.009  
4,23.121,rs7656072,0.003  
4,23.162,rs4333176,0.005  
4,23.180,rs13109005,0.007  
4,23.243,rs4697777,0.007  
4,23.481,rs16872571,0.019  
4,23.981,rs16873628,0.037  
4,24.284,rs959233,0.048

4,24.518,rs6821267,0.055  
4,24.602,rs10009111,0.053  
4,24.962,rs1110364,0.061  
4,25.351,rs12509327,0.066  
4,25.360,rs9291505,0.070  
4,25.367,rs1606724,0.073  
4,25.383,rs1355967,0.082  
4,25.387,rs2203396,0.082  
4,25.401,rs1533338,0.082  
4,25.442,rs1558402,0.077  
4,25.452,rs725432,0.071  
4,25.457,rs11731587,0.065  
4,25.471,rs2109600,0.048  
4,25.473,rs7660733,0.045  
4,25.490,rs224470,0.046  
4,25.512,rs1565924,0.041  
4,25.521,rs12647573,0.051  
4,25.527,rs17491203,0.075  
4,25.528,rs956469,0.078  
4,25.539,rs10049912,0.079  
4,25.560,rs10032590,0.090  
4,25.608,rs11729868,0.088  
4,25.618,rs6825825,0.094  
4,25.632,rs923747,0.102  
4,25.677,rs6843251,0.132  
4,25.724,rs7696250,0.138  
4,25.742,rs6448852,0.135  
4,25.859,rs10516251,0.149  
4,25.873,rs1454878,0.155  
4,25.924,rs9283696,0.153  
4,25.961,rs7656574,0.144  
4,26.169,rs13151965,0.103  
4,26.247,rs6448952,0.087  
4,26.337,rs7697105,0.063  
4,26.396,rs223976,0.061  
4,26.400,rs223982,0.061  
4,26.422,rs2867020,0.060  
4,26.452,rs4834860,0.035  
4,26.472,rs2903472,0.038  
4,26.486,rs481012,0.040  
4,26.503,rs1021873,0.055  
4,26.506,rs512244,0.056  
4,26.523,rs510171,0.063  
4,26.545,rs490325,0.065  
4,26.637,rs11729455,0.076  
4,26.645,rs16888468,0.080  
4,26.649,rs1014335,0.081  
4,26.727,rs2109590,0.086  
4,26.967,rs2075050,0.100  
4,26.974,rs10034452,0.100  
4,27.079,rs1013300,0.118  
4,27.223,rs1586761,0.123  
4,27.253,rs1491267,0.124  
4,27.309,rs759261,0.119  
4,27.386,rs1008218,0.118  
4,27.391,rs1019271,0.123  
4,27.407,rs716424,0.100  
4,27.423,rs10489088,0.106  
4,27.426,rs10012159,0.107  
4,27.443,rs7660348,0.103  
4,27.654,rs971079,0.141

4,27.981,rs3846415,0.162  
4,28.047,rs9998508,0.157  
4,28.166,rs3096579,0.149  
4,28.171,rs12499689,0.149  
4,28.182,rs1991268,0.145  
4,28.188,rs6826155,0.141  
4,28.213,rs2079949,0.113  
4,28.241,rs16890128,0.103  
4,28.246,rs6449012,0.101  
4,28.301,rs9996349,0.093  
4,28.363,rs1013284,0.083  
4,28.372,rs7654792,0.101  
4,28.377,rs6449024,0.102  
4,28.627,rs1501180,0.103  
4,28.786,rs4550921,0.091  
4,28.802,rs764759,0.092  
4,28.867,rs4327484,0.090  
4,28.940,rs11724609,0.090  
4,29.047,rs11731529,0.103  
4,29.114,rs1316686,0.107  
4,29.172,rs9884305,0.100  
4,29.178,rs1494951,0.101  
4,29.194,rs16891148,0.102  
4,29.238,rs7656729,0.099  
4,29.269,rs1494957,0.097  
4,29.291,rs6449093,0.094  
4,29.553,rs11721627,0.063  
4,29.580,rs2604562,0.076  
4,29.665,rs10516285,0.085  
4,29.730,rs6811795,0.092  
4,30.123,rs2160043,0.088  
4,30.457,rs3213710,0.105  
4,30.535,rs10002171,0.120  
4,30.647,rs10805347,0.142  
4,30.698,rs2531166,0.125  
4,30.731,rs2191003,0.139  
4,30.759,rs2531149,0.145  
4,30.771,rs11723486,0.143  
4,30.790,rs11730943,0.154  
4,30.814,rs9968276,0.170  
4,30.842,rs12506181,0.195  
4,30.883,rs3796850,0.213  
4,30.884,rs717176,0.213  
4,30.908,rs2313734,0.215  
4,30.919,rs17387327,0.216  
4,30.922,rs2286455,0.221  
4,30.932,rs7663999,0.237  
4,30.939,rs884718,0.235  
4,30.994,rs1004861,0.236  
4,30.994,rs11935542,0.236  
4,30.998,rs1712493,0.236  
4,31.051,rs11730743,0.267  
4,31.368,rs2215637,0.241  
4,31.626,rs4321631,0.231  
4,31.787,rs6449244,0.230  
4,31.874,rs4698149,0.245  
4,31.914,rs7440228,0.250  
4,31.914,rs10026610,0.250  
4,31.966,rs7672573,0.255  
4,31.992,rs1501140,0.253  
4,32.049,rs3792679,0.249

4,32.074,rs6843498,0.248  
4,32.089,rs10020336,0.230  
4,32.100,rs10805351,0.217  
4,32.154,rs13113158,0.211  
4,32.162,rs1501127,0.211  
4,32.282,rs1496747,0.230  
4,32.387,rs924158,0.223  
4,32.413,rs3763969,0.222  
4,32.462,rs1027784,0.213  
4,32.466,rs6449262,0.215  
4,32.484,rs6851110,0.198  
4,32.491,rs7660353,0.199  
4,32.500,rs7661729,0.201  
4,32.660,rs283018,0.357  
4,32.784,rs207699,0.393  
4,32.957,rs207713,0.363  
4,33.002,rs11734663,0.356  
4,33.184,rs917494,0.332  
4,33.477,rs13107569,0.290  
4,33.485,rs1356028,0.289  
4,33.880,rs6449278,0.293  
4,34.043,rs584272,0.364  
4,34.109,rs1981693,0.356  
4,34.110,rs6847269,0.355  
4,34.138,rs10939711,0.343  
4,34.139,rs4698560,0.343  
4,34.148,rs6810740,0.347  
4,34.211,rs6843133,0.368  
4,34.340,rs1901168,0.423  
4,34.395,rs2597751,0.344  
4,34.397,rs4698599,0.346  
4,34.431,rs2518649,0.381  
4,34.436,rs6843189,0.366  
4,34.502,rs1860596,0.368  
4,34.572,rs16895707,0.362  
4,34.668,rs1506613,0.387  
4,34.779,rs7684006,0.396  
4,34.796,rs1847401,0.393  
4,34.842,rs10488994,0.355  
4,34.851,rs2192521,0.348  
4,34.857,rs6836877,0.341  
4,34.883,rs741207,0.314  
4,35.088,rs10027409,0.304  
4,35.296,rs13145150,0.248  
4,35.328,rs7658418,0.200  
4,35.344,rs6833091,0.194  
4,35.600,rs13107783,0.196  
4,35.638,rs1032133,0.200  
4,35.851,rs812652,0.220  
4,35.889,rs559767,0.225  
4,35.933,rs16869461,0.225  
4,35.996,rs9993087,0.226  
4,35.997,rs4696953,0.226  
4,36.002,rs10938796,0.226  
4,36.178,rs11942897,0.215  
4,36.190,rs1033111,0.214  
4,36.215,rs16869665,0.194  
4,36.221,rs4443280,0.164  
4,36.258,rs6825654,0.146  
4,36.261,rs519813,0.145  
4,36.279,rs6816854,0.141

4,36.281,rs520535,0.141  
4,36.292,rs7669094,0.141  
4,36.303,rs17542486,0.143  
4,36.321,rs506358,0.147  
4,36.374,rs2322559,0.155  
4,36.393,rs17544103,0.160  
4,36.404,rs936359,0.161  
4,36.417,rs1465522,0.170  
4,36.606,rs7657542,0.189  
4,36.612,rs13129008,0.192  
4,36.614,rs16869949,0.193  
4,36.683,rs1863633,0.220  
4,36.701,rs12501548,0.228  
4,36.703,rs11734471,0.228  
4,36.714,rs10013103,0.227  
4,36.739,rs1352797,0.227  
4,36.756,rs4697192,0.226  
4,36.772,rs1565534,0.258  
4,36.877,rs1434954,0.262  
4,37.003,rs10034991,0.268  
4,37.041,rs4389575,0.267  
4,37.065,rs6853609,0.270  
4,37.180,rs10011670,0.310  
4,37.181,rs10007205,0.311  
4,37.229,rs4696973,0.417  
4,37.231,rs6858452,0.379  
4,37.246,rs16870878,0.376  
4,37.248,rs17521122,0.373  
4,37.261,rs1908552,0.357  
4,37.267,rs6448050,0.350  
4,37.269,rs1874341,0.347  
4,37.281,rs1476279,0.334  
4,37.291,rs16871128,0.331  
4,37.356,rs16871434,0.306  
4,37.360,rs16871465,0.304  
4,37.361,rs1604805,0.304  
4,37.362,rs402802,0.304  
4,37.405,rs2323070,0.296  
4,37.429,rs7666642,0.288  
4,37.453,rs1354390,0.281  
4,37.468,rs4235291,0.278  
4,37.559,rs4377576,0.281  
4,37.605,rs10516407,0.314  
4,37.674,rs2007195,0.322  
4,37.880,rs4697275,0.272  
4,37.942,rs6448144,0.266  
4,37.968,rs1983021,0.265  
4,38.038,rs16872651,0.228  
4,38.080,rs1841823,0.239  
4,38.090,rs10516410,0.245  
4,38.112,rs2009731,0.247  
4,38.149,rs17539365,0.279  
4,38.298,rs3099557,0.351  
4,38.310,rs439863,0.354  
4,38.449,rs2323700,0.388  
4,38.510,rs13132256,0.402  
4,38.818,rs7697052,0.411  
4,38.995,rs1858113,0.415  
4,39.157,rs215410,0.409  
4,39.240,rs10010445,0.386  
4,39.298,rs1155194,0.397

4,39.333,rs10517018,0.403  
4,39.334,rs950950,0.403  
4,39.355,rs10027997,0.408  
4,39.355,rs1397829,0.408  
4,39.418,rs13109659,0.411  
4,39.469,rs16874043,0.424  
4,39.472,rs1491389,0.425  
4,39.479,rs16874072,0.409  
4,39.526,rs12650562,0.339  
4,39.554,rs6448226,0.337  
4,39.574,rs7437482,0.381  
4,39.584,rs4235308,0.376  
4,39.607,rs4469064,0.327  
4,39.635,rs2946394,0.331  
4,39.716,rs1316862,0.304  
4,39.876,rs16875028,0.291  
4,39.896,rs2215492,0.288  
4,39.990,rs1995917,0.277  
4,40.019,rs10938983,0.272  
4,40.026,rs7662477,0.271  
4,40.031,rs7666134,0.271  
4,40.060,rs17648420,0.263  
4,40.128,rs9685879,0.255  
4,40.142,rs13143233,0.253  
4,40.354,rs3857105,0.221  
4,40.811,rs7690462,0.179  
4,40.903,rs17651313,0.180  
4,40.957,rs6817993,0.183  
4,41.056,rs17651758,0.182  
4,41.241,rs11737023,0.202  
4,41.380,rs12506649,0.213  
4,41.482,rs10517052,0.180  
4,41.588,rs1395221,0.195  
4,41.611,rs4312745,0.192  
4,41.632,rs12507254,0.188  
4,41.690,rs1476880,0.162  
4,41.695,rs12500612,0.161  
4,41.745,rs2284659,0.135  
4,41.830,rs4697489,0.169  
4,41.840,rs10939012,0.172  
4,41.846,rs4697075,0.173  
4,41.887,rs3846336,0.183  
4,42.003,rs4697516,0.237  
4,42.037,rs6853990,0.239  
4,42.072,rs4697525,0.289  
4,42.102,rs736831,0.307  
4,42.172,rs7654693,0.333  
4,42.174,rs6817894,0.334  
4,42.174,rs4697534,0.334  
4,42.176,rs2098302,0.335  
4,42.185,rs2324654,0.336  
4,42.258,rs759243,0.308  
4,42.850,rs13121078,0.322  
4,42.931,rs13133104,0.324  
4,43.017,rs1963656,0.323  
4,43.132,rs16877042,0.329  
4,43.678,rs6837837,0.360  
4,43.841,rs13116199,0.344  
4,43.844,rs1399240,0.344  
4,44.038,rs6851586,0.329  
4,44.285,rs871476,0.320

4,44.436,rs16877245,0.308  
4,44.473,rs7689639,0.307  
4,44.584,rs7664681,0.293  
4,44.702,rs939356,0.293  
4,44.717,rs7671379,0.291  
4,44.750,rs4580639,0.284  
4,44.804,rs3733545,0.337  
4,44.805,rs4374611,0.338  
4,44.806,rs4697598,0.339  
4,44.849,rs7692656,0.362  
4,44.890,rs11721812,0.367  
4,44.940,rs2276950,0.363  
4,44.958,rs6448402,0.362  
4,44.971,rs2309286,0.365  
4,45.065,rs6847559,0.357  
4,45.107,rs6831024,0.355  
4,45.120,rs731284,0.385  
4,45.189,rs878552,0.384  
4,45.268,rs6820447,0.393  
4,45.282,rs936236,0.444  
4,45.373,rs4269167,0.569  
4,45.392,rs4692317,0.562  
4,45.486,rs6827904,0.531  
4,45.496,rs4692073,0.528  
4,45.547,rs4692386,0.492  
4,45.555,rs7682322,0.483  
4,45.578,rs4692399,0.516  
4,45.619,rs1512105,0.531  
4,45.655,rs10017756,0.520  
4,45.661,rs10005500,0.524  
4,45.688,rs10939100,0.545  
4,45.719,rs3857127,0.537  
4,45.755,rs10028140,0.526  
4,45.858,rs3822223,0.495  
4,46.050,rs10805262,0.463  
4,46.098,rs716073,0.435  
4,46.117,rs967413,0.428  
4,46.156,rs2130250,0.436  
4,46.200,rs4692540,0.433  
4,46.206,rs6838762,0.431  
4,46.270,rs2014308,0.407  
4,46.693,rs6448475,0.488  
4,46.699,rs6839242,0.445  
4,46.705,rs4407490,0.444  
4,46.878,rs7658174,0.431  
4,47.067,rs7678869,0.427  
4,47.077,rs4692020,0.467  
4,47.135,rs2041627,0.436  
4,47.169,rs969949,0.419  
4,47.177,rs6813524,0.417  
4,47.322,rs901832,0.416  
4,47.322,rs901833,0.416  
4,47.357,rs1488299,0.366  
4,47.362,rs748057,0.323  
4,47.371,rs6848074,0.325  
4,47.411,rs4692196,0.312  
4,47.422,rs9291495,0.278  
4,47.426,rs13134892,0.281  
4,47.486,rs210782,0.293  
4,47.561,rs10506518,0.223  
4,47.590,rs6847492,0.214



4,47.630,rs2034472,0.184  
4,47.659,rs6448532,0.214  
4,47.697,rs10014448,0.220  
4,47.726,rs16879804,0.238  
4,47.814,rs10016121,0.287  
4,47.825,rs9990661,0.287  
4,47.841,rs2058574,0.287  
4,47.968,rs1527328,0.270  
4,47.993,rs10009033,0.272  
4,48.008,rs16880367,0.244  
4,48.034,rs2309717,0.247  
4,48.510,rs675680,0.293  
4,48.930,rs1389169,0.307  
4,49.034,rs9685881,0.297  
4,49.108,rs11946866,0.256  
4,49.277,rs6850637,0.276  
4,49.301,rs4441746,0.279  
4,49.425,rs12647787,0.285  
4,49.481,rs1402499,0.258  
4,49.497,rs4326073,0.270  
4,49.581,rs6815902,0.290  
4,49.657,rs1402481,0.340  
4,49.706,rs4401510,0.315  
4,49.839,rs13148111,0.298  
4,49.873,rs6448638,0.331  
4,49.897,rs181999,0.326  
4,49.925,rs11936766,0.342  
4,50.196,rs6853827,0.445  
4,50.230,rs2047870,0.500  
4,50.340,rs10001348,0.504  
4,50.409,rs3884638,0.498  
4,50.530,rs7689614,0.459  
4,50.537,rs1469784,0.462  
4,50.542,rs2613167,0.465  
4,50.585,rs2571468,0.476  
4,50.664,rs1435779,0.469  
4,50.721,rs12509641,0.468  
4,50.731,rs7681280,0.469  
4,50.777,rs2164384,0.492  
4,50.825,rs6812829,0.512  
4,50.879,rs13131444,0.533  
4,51.095,rs6816969,0.509  
4,51.239,rs7659873,0.492  
4,51.405,rs6820873,0.453  
4,51.441,rs2201945,0.451  
4,51.475,rs16884372,0.465  
4,51.531,rs1353854,0.487  
4,51.590,rs6448754,0.508  
4,51.621,rs6849452,0.518  
4,51.707,rs11735188,0.541  
4,51.776,rs11935585,0.553  
4,51.819,rs6827566,0.562  
4,51.835,rs4692508,0.564  
4,51.845,rs2081665,0.565  
4,52.047,rs446149,0.565  
4,52.312,rs11944702,0.629  
4,52.387,rs2192531,0.664  
4,52.392,rs13133369,0.663  
4,52.406,rs17595220,0.667  
4,52.457,rs1861127,0.693  
4,52.495,rs965954,0.714

4,52.498,rs17604071,0.719  
4,52.505,rs2310395,0.727  
4,52.627,rs1523145,0.689  
4,52.698,rs10027346,0.673  
4,52.700,rs17742652,0.672  
4,52.763,rs6816397,0.618  
4,52.849,rs1996886,0.603  
4,52.920,rs4568279,0.520  
4,52.944,rs7663866,0.483  
4,53.026,rs7697063,0.508  
4,53.169,rs11096807,0.713  
4,53.172,rs7680581,0.718  
4,53.218,rs2687386,0.790  
4,53.304,rs6824666,0.936  
4,53.319,rs10517277,0.950  
4,53.331,rs7665332,0.959  
4,53.384,rs10025535,1.003  
4,53.483,rs6531772,1.040  
4,54.012,rs6849320,1.085  
4,54.126,rs921853,1.103  
4,54.210,rs1023933,1.103  
4,54.270,rs11947034,0.950  
4,54.340,rs6849048,0.864  
4,54.695,rs12502892,0.953  
4,54.730,rs2889174,0.961  
4,54.835,rs2271810,0.952  
4,54.875,rs6812542,0.981  
4,54.993,rs7680904,1.010  
4,55.008,rs4481252,1.011  
4,55.169,rs2055411,1.051  
4,55.235,rs9995922,1.041  
4,55.257,rs16992103,1.036  
4,55.276,rs1392891,1.032  
4,55.291,rs16992175,1.024  
4,55.363,rs6855055,0.983  
4,55.386,rs4605678,0.969  
4,55.476,rs2375971,0.915  
4,55.623,rs17465676,0.826  
4,55.656,rs2376150,0.825  
4,55.936,rs1373474,0.907  
4,55.954,rs4832844,0.920  
4,55.967,rs1584108,0.913  
4,56.108,rs4289452,0.843  
4,56.177,rs10484216,0.835  
4,56.209,rs1648395,0.819  
4,56.280,rs17603438,0.783  
4,56.282,rs7661725,0.782  
4,56.324,rs1656235,0.751  
4,56.334,rs13115793,0.756  
4,56.362,rs17575890,0.755  
4,56.396,rs3892368,0.723  
4,56.418,rs764882,0.701  
4,56.421,rs7375557,0.698  
4,56.438,rs10028027,0.685  
4,56.450,rs6816980,0.697  
4,56.455,rs1463575,0.703  
4,56.494,rs2939748,0.789  
4,56.504,rs10517412,0.853  
4,56.504,rs17604934,0.855  
4,56.528,rs7655445,0.851  
4,56.541,rs17605100,0.845

4,56.548,rs11723493,0.842  
4,56.624,rs2973280,0.889  
4,56.694,rs3756143,0.891  
4,56.719,rs9998333,0.874  
4,56.806,rs2009494,0.847  
4,56.849,rs12505604,0.790  
4,56.924,rs10517429,0.710  
4,56.952,rs4832940,0.694  
4,56.978,rs7692977,0.626  
4,57.069,rs3775793,0.584  
4,57.086,rs10001580,0.560  
4,57.134,rs17578829,0.494  
4,57.164,rs2995919,0.454  
4,57.172,rs2995916,0.448  
4,57.200,rs4832745,0.432  
4,57.252,rs11736130,0.450  
4,57.311,rs7672883,0.431  
4,57.444,rs10517469,0.352  
4,57.549,rs4832749,0.331  
4,57.574,rs586844,0.290  
4,57.597,rs4833009,0.284  
4,57.631,rs2381135,0.280  
4,57.649,rs6857949,0.280  
4,57.673,rs907314,0.281  
4,57.715,rs4833029,0.307  
4,57.721,rs10517472,0.343  
4,57.784,rs13139166,0.348  
4,57.841,rs6810650,0.340  
4,57.981,rs4131726,0.325  
4,58.065,rs2637729,0.290  
4,58.086,rs16994601,0.284  
4,58.088,rs7675136,0.283  
4,58.134,rs7654396,0.269  
4,58.172,rs16994672,0.267  
4,58.242,rs1824652,0.263  
4,58.327,rs17500878,0.259  
4,58.355,rs1005761,0.261  
4,58.363,rs7658334,0.262  
4,58.382,rs6823756,0.272  
4,58.617,rs12641669,0.412  
4,58.629,rs7676657,0.411  
4,58.673,rs6531684,0.403  
4,58.678,rs2011590,0.398  
4,58.702,rs17583426,0.377  
4,58.743,rs17583481,0.350  
4,58.768,rs11096969,0.363  
4,59.310,rs2062228,0.367  
4,59.351,rs13135439,0.365  
4,59.371,rs13147477,0.376  
4,59.399,rs2687963,0.389  
4,59.477,rs2687965,0.395  
4,59.690,rs977385,0.380  
4,59.779,rs3912392,0.373  
4,59.922,rs11097004,0.421  
4,59.961,rs50296,0.385  
4,60.179,rs557980,0.397  
4,60.233,rs11737408,0.379  
4,60.438,rs807787,0.326  
4,60.510,rs1397934,0.353  
4,60.528,rs1317577,0.377  
4,60.562,rs4974974,0.393

4,60.570,rs2381501,0.394  
4,60.660,rs12643250,0.480  
4,60.693,rs9683756,0.491  
4,60.721,rs11932152,0.516  
4,60.824,rs4861307,0.467  
4,60.896,rs902856,0.513  
4,60.909,rs17440690,0.518  
4,60.927,rs278973,0.524  
4,60.929,rs4476635,0.529  
4,60.971,rs203273,0.527  
4,60.989,rs278981,0.508  
4,61.000,rs3105208,0.477  
4,61.036,rs7689954,0.471  
4,61.057,rs278949,0.490  
4,61.114,rs4861170,0.544  
4,61.115,rs10517543,0.544  
4,61.142,rs6835176,0.520  
4,61.209,rs4632692,0.439  
4,61.321,rs17513191,0.390  
4,61.358,rs6829898,0.296  
4,61.525,rs7679359,0.284  
4,61.589,rs10017429,0.281  
4,61.610,rs2035385,0.285  
4,61.684,rs6830900,0.320  
4,61.732,rs4516756,0.344  
4,61.770,rs11727143,0.353  
4,62.000,rs4861067,0.312  
4,62.053,rs719379,0.309  
4,62.140,rs4861322,0.300  
4,62.297,rs11733857,0.320  
4,62.370,rs6832948,0.317  
4,62.437,rs1032984,0.313  
4,62.461,rs9992186,0.311  
4,62.655,rs13129535,0.297  
4,62.706,rs1110281,0.266  
4,62.762,rs6842814,0.232  
4,62.763,rs17443381,0.231  
4,62.773,rs7695309,0.231  
4,62.773,rs6811777,0.231  
4,62.837,rs12186184,0.270  
4,62.868,rs16853120,0.263  
4,62.917,rs17628171,0.234  
4,62.925,rs13140742,0.231  
4,62.956,rs4527518,0.218  
4,62.968,rs7665984,0.213  
4,63.029,rs6447085,0.225  
4,63.095,rs10026359,0.210  
4,63.144,rs11734372,0.191  
4,63.171,rs12650313,0.186  
4,63.240,rs1154598,0.171  
4,63.252,rs6834302,0.174  
4,63.257,rs7664468,0.174  
4,63.465,rs17530357,0.241  
4,63.513,rs4132888,0.254  
4,63.546,rs13151738,0.255  
4,63.579,rs7674997,0.256  
4,63.583,rs9999533,0.252  
4,63.596,rs17530621,0.241  
4,63.734,rs3103218,0.196  
4,63.818,rs4280770,0.216  
4,63.932,rs898500,0.196

4,63.943,rs7693131,0.217  
4,64.021,rs13146994,0.195  
4,64.086,rs17637607,0.250  
4,64.095,rs1562840,0.259  
4,64.116,rs11728299,0.270  
4,64.270,rs920152,0.352  
4,64.285,rs4447896,0.356  
4,64.302,rs1442855,0.356  
4,64.316,rs671254,0.356  
4,64.403,rs16856334,0.355  
4,64.576,rs10938307,0.365  
4,64.672,rs2722147,0.375  
4,64.700,rs6834369,0.382  
4,64.755,rs4695447,0.395  
4,64.927,rs4695701,0.408  
4,65.030,rs11941070,0.389  
4,65.037,rs6853031,0.392  
4,65.043,rs17599591,0.394  
4,65.061,rs4312793,0.402  
4,65.098,rs16857230,0.413  
4,65.106,rs1388311,0.412  
4,65.165,rs2882027,0.460  
4,65.180,rs10155504,0.471  
4,65.187,rs4306991,0.477  
4,65.197,rs16858015,0.481  
4,65.209,rs12641981,0.467  
4,65.242,rs2349125,0.399  
4,65.247,rs1476295,0.389  
4,65.319,rs840193,0.389  
4,65.361,rs6829634,0.389  
4,65.441,rs1456508,0.394  
4,65.461,rs1389040,0.395  
4,65.514,rs2035906,0.395  
4,65.561,rs7685154,0.399  
4,65.594,rs1394346,0.402  
4,65.675,rs1391174,0.408  
4,65.682,rs13109156,0.407  
4,65.901,rs4478161,0.372  
4,65.962,rs10517174,0.372  
4,65.968,rs6447520,0.373  
4,65.969,rs1512142,0.373  
4,65.986,rs10015366,0.406  
4,65.999,rs1866990,0.406  
4,66.037,rs1372497,0.401  
4,66.038,rs12501459,0.401  
4,66.096,rs3822113,0.361  
4,66.103,rs13102764,0.361  
4,66.123,rs10938487,0.374  
4,66.124,rs4292304,0.380  
4,66.126,rs4235151,0.388  
4,66.128,rs6829033,0.392  
4,66.136,rs12374260,0.418  
4,66.152,rs7694197,0.418  
4,66.159,rs6832495,0.416  
4,66.183,rs13118104,0.411  
4,66.212,rs9996629,0.401  
4,66.226,rs16860658,0.395  
4,66.280,rs17654757,0.376  
4,66.297,rs4340770,0.386  
4,66.299,rs17470528,0.387  
4,66.335,rs3792622,0.401

4,66.349,rs1912163,0.392  
4,66.378,rs309890,0.373  
4,66.381,rs4599384,0.373  
4,66.384,rs10517217,0.367  
4,66.393,rs6447636,0.350  
4,66.430,rs2354947,0.385  
4,66.745,rs225160,0.439  
4,66.761,rs6554360,0.454  
4,66.792,rs13435749,0.450  
4,66.814,rs346005,0.395  
4,67.162,rs301126,0.452  
4,67.198,rs301088,0.456  
4,67.330,rs11934112,0.468  
4,67.389,rs4864728,0.469  
4,67.579,rs11725172,0.470  
4,67.720,rs4864763,0.450  
4,67.760,rs9999406,0.445  
4,67.781,rs1435219,0.442  
4,67.790,rs17660061,0.441  
4,67.865,rs959094,0.447  
4,67.870,rs2616417,0.447  
4,67.930,rs2199574,0.462  
4,67.956,rs715155,0.513  
4,67.958,rs728587,0.513  
4,68.018,rs2412494,0.493  
4,68.121,rs4864829,0.457  
4,68.226,rs12500026,0.446  
4,68.350,rs1357133,0.453  
4,68.737,rs13117345,0.454  
4,68.778,rs6554147,0.454  
4,68.817,rs6554150,0.492  
4,68.885,rs12233727,0.542  
4,68.918,rs7656613,0.569  
4,68.921,rs1547904,0.571  
4,68.946,rs11729535,0.577  
4,68.959,rs2412563,0.539  
4,68.997,rs10517334,0.538  
4,69.077,rs6554190,0.525  
4,69.147,rs218273,0.554  
4,69.202,rs4864910,0.625  
4,69.257,rs2703457,0.672  
4,69.301,rs7695300,0.701  
4,69.444,rs2213180,0.777  
4,69.458,rs4406072,0.779  
4,69.504,rs3109915,0.782  
4,69.510,rs11732323,0.787  
4,69.575,rs2412611,0.846  
4,69.612,rs1948607,0.873  
4,69.755,rs1497482,0.836  
4,69.878,rs6842830,0.814  
4,69.882,rs4262039,0.819  
4,69.887,rs4864948,0.821  
4,69.890,rs4453992,0.825  
4,69.920,rs4864949,0.853  
4,70.011,rs17709898,1.025  
4,70.046,rs2305948,1.097  
4,70.067,rs2071559,1.119  
4,70.323,rs4864976,1.137  
4,70.377,rs17776421,1.129  
4,70.519,rs11943456,1.078  
4,70.895,rs1488938,0.933

4,71.005,rs7665149,0.866  
4,71.075,rs11725155,0.790  
4,71.094,rs7677808,0.768  
4,71.121,rs1955161,0.723  
4,71.198,rs1447050,0.742  
4,71.442,rs4526032,0.779  
4,71.580,rs2412723,0.793  
4,71.695,rs6554340,0.721  
4,71.804,rs533178,0.703  
4,71.829,rs490591,0.648  
4,71.868,rs7663149,0.571  
4,71.905,rs7663516,0.559  
4,71.920,rs1401910,0.558  
4,72.176,rs13102012,0.569  
4,72.710,rs4270628,0.466  
4,72.749,rs7691920,0.444  
4,72.785,rs7670824,0.425  
4,72.804,rs7699631,0.405  
4,72.840,rs4371677,0.394  
4,72.879,rs9968381,0.395  
4,72.915,rs4864599,0.396  
4,72.930,rs10222715,0.363  
4,72.945,rs6811987,0.369  
4,72.963,rs2412757,0.393  
4,72.998,rs781542,0.439  
4,73.005,rs1399002,0.431  
4,73.048,rs4560473,0.476  
4,73.090,rs1713985,0.494  
4,73.198,rs1277311,0.541  
4,73.204,rs1277273,0.546  
4,73.217,rs1713959,0.551  
4,73.259,rs10004910,0.586  
4,73.303,rs4579186,0.592  
4,73.348,rs10014421,0.652  
4,73.350,rs10488926,0.661  
4,73.365,rs4865199,0.734  
4,73.367,rs6812462,0.737  
4,73.396,rs11731338,0.746  
4,73.419,rs2191574,0.712  
4,73.446,rs6840839,0.726  
4,73.455,rs1524686,0.730  
4,73.540,rs1012188,0.766  
4,73.579,rs1561660,0.786  
4,73.612,rs7696759,0.803  
4,73.731,rs4557336,0.851  
4,73.769,rs1425320,0.855  
4,73.810,rs343501,0.884  
4,73.853,rs343549,0.947  
4,73.899,rs13134774,1.058  
4,73.908,rs4865283,1.081  
4,73.928,rs7679186,1.125  
4,73.928,rs12505795,1.126  
4,73.932,rs3843894,1.095  
4,73.935,rs983355,1.078  
4,73.945,rs922605,1.098  
4,74.007,rs1480332,0.994  
4,74.017,rs7657187,0.997  
4,74.121,rs1507578,1.036  
4,74.127,rs1380196,1.028  
4,74.136,rs2174809,1.014  
4,74.147,rs2660943,0.991

4,74.213,rs10517437,1.016  
4,74.271,rs2570100,1.046  
4,74.520,rs4864655,1.165  
4,74.592,rs9942216,1.080  
4,74.638,rs7674325,1.068  
4,74.647,rs2333727,1.064  
4,74.740,rs7663467,1.076  
4,74.747,rs7693572,1.080  
4,74.758,rs9312092,1.087  
4,74.819,rs1511404,1.144  
4,74.863,rs6811282,1.135  
4,74.910,rs970313,1.130  
4,75.022,rs9312186,1.094  
4,75.074,rs1834384,1.104  
4,75.100,rs13112895,1.114  
4,75.104,rs349235,1.115  
4,75.109,rs349215,1.118  
4,75.381,rs6852374,1.199  
4,75.447,rs6843734,1.267  
4,75.463,rs10024649,1.272  
4,75.494,rs4460023,1.280  
4,75.597,rs10022351,1.315  
4,75.622,rs1906073,1.299  
4,75.685,rs7699691,1.356  
4,75.699,rs4599440,1.342  
4,75.725,rs10866114,1.157  
4,75.730,rs930668,1.148  
4,75.787,rs6854914,1.044  
4,75.807,rs924940,1.021  
4,75.810,rs1827770,0.962  
4,75.830,rs10517529,0.965  
4,75.854,rs9998310,0.998  
4,75.857,rs7695405,0.996  
4,75.861,rs2880363,0.936  
4,75.930,rs17090446,1.020  
4,75.953,rs10428284,1.047  
4,75.959,rs2124794,1.053  
4,76.013,rs10016690,1.076  
4,76.015,rs335271,1.076  
4,76.109,rs7666147,1.101  
4,76.190,rs12646895,1.119  
4,76.244,rs6846033,1.171  
4,76.274,rs12648453,1.189  
4,76.353,rs1397546,1.242  
4,76.429,rs1124974,1.292  
4,76.466,rs7694238,1.270  
4,76.561,rs11131367,1.147  
4,76.602,rs2697201,1.103  
4,76.616,rs12640895,1.085  
4,76.626,rs17292275,1.090  
4,76.641,rs13126803,1.097  
4,76.671,rs1031536,1.111  
4,76.684,rs6854419,1.103  
4,76.722,rs12500171,1.084  
4,76.742,rs12509725,1.078  
4,76.790,rs12508568,1.064  
4,76.849,rs2036639,1.047  
4,76.852,rs12649725,1.046  
4,76.880,rs1507317,1.046  
4,76.893,rs11932508,1.046  
4,76.962,rs2346648,0.981



4,77.102,rs9999371,0.881  
4,77.104,rs2346937,0.879  
4,77.133,rs2346939,0.813  
4,77.198,rs549815,0.790  
4,77.278,rs6855459,0.780  
4,77.328,rs10452252,0.784  
4,77.629,rs1402142,0.790  
4,77.816,rs1483288,0.825  
4,77.862,rs2086731,0.729  
4,77.876,rs1425395,0.730  
4,77.926,rs11937285,0.703  
4,77.943,rs6828768,0.693  
4,77.969,rs1430519,0.719  
4,78.094,rs1440949,0.668  
4,78.213,rs1451160,0.688  
4,78.222,rs986208,0.690  
4,78.425,rs10012882,0.712  
4,78.657,rs6831652,0.735  
4,78.689,rs4425430,0.738  
4,78.694,rs4337775,0.739  
4,78.710,rs4518304,0.739  
4,78.719,rs6854088,0.745  
4,78.750,rs11727254,0.792  
4,78.753,rs4629506,0.795  
4,78.761,rs10009221,0.825  
4,78.783,rs17082137,0.839  
4,78.799,rs10517949,0.885  
4,78.865,rs1461827,0.949  
4,78.872,rs10517955,0.978  
4,78.873,rs2588666,0.979  
4,78.874,rs1436,0.979  
4,78.881,rs2061459,0.977  
4,78.887,rs10011993,0.944  
4,78.940,rs2175431,0.904  
4,78.962,rs1512965,0.924  
4,78.964,rs7663168,0.899  
4,79.030,rs1397470,0.895  
4,79.105,rs10518013,0.846  
4,79.112,rs13144587,0.831  
4,79.135,rs1450036,0.842  
4,79.167,rs1450024,0.849  
4,79.307,rs730934,0.757  
4,79.332,rs1425655,0.721  
4,79.379,rs746877,0.690  
4,79.395,rs10008670,0.708  
4,79.400,rs7669658,0.712  
4,79.454,rs1056787,0.751  
4,79.491,rs354883,0.793  
4,79.551,rs972072,0.812  
4,79.552,rs6828922,0.812  
4,79.586,rs1371928,0.831  
4,79.593,rs1348079,0.768  
4,79.625,rs353158,0.748  
4,79.695,rs6826271,0.708  
4,79.842,rs17590869,0.746  
4,79.940,rs939207,0.719  
4,79.980,rs17592868,0.708  
4,79.980,rs7666993,0.708  
4,79.987,rs17652284,0.709  
4,80.294,rs293433,0.739  
4,80.380,rs1379809,0.765

4,80.403,rs4149418,0.728  
4,80.407,rs1847366,0.707  
4,80.464,rs1581680,0.725  
4,80.476,rs1529039,0.727  
4,80.492,rs4149525,0.734  
4,80.550,rs1002082,0.780  
4,80.660,rs6855744,0.795  
4,80.691,rs11735430,0.798  
4,80.708,rs17652789,0.792  
4,80.774,rs1842469,0.741  
4,80.819,rs1480757,0.790  
4,80.827,rs1842472,0.791  
4,80.955,rs3852105,0.809  
4,80.981,rs4694075,0.773  
4,81.012,rs13146209,0.929  
4,81.243,rs10518081,0.780  
4,81.289,rs17688758,0.775  
4,81.306,rs1979537,0.773  
4,81.352,rs2579362,0.766  
4,81.364,rs13147721,0.764  
4,81.370,rs1377287,0.763  
4,81.429,rs16846318,0.756  
4,81.799,rs6858376,0.704  
4,81.905,rs7693843,0.697  
4,81.924,rs16846575,0.676  
4,81.930,rs1031453,0.673  
4,82.027,rs2219070,0.643  
4,82.256,rs7683624,0.658  
4,82.306,rs1474198,0.663  
4,82.341,rs1520497,0.664  
4,82.538,rs1369095,0.696  
4,82.539,rs9994557,0.696  
4,82.593,rs10019624,0.644  
4,82.595,rs10518102,0.642  
4,82.721,rs2086471,0.689  
4,82.737,rs986397,0.687  
4,82.755,rs4694523,0.690  
4,82.790,rs221594,0.643  
4,82.999,rs6853164,0.733  
4,83.154,rs1247583,0.699  
4,83.184,rs1358594,0.702  
4,83.271,rs12506479,0.711  
4,83.496,rs9998340,0.742  
4,83.643,rs3097412,0.665  
4,83.739,rs10938105,0.671  
4,83.808,rs422140,0.669  
4,83.908,rs9131,0.665  
4,84.028,rs477975,0.644  
4,84.080,rs1460016,0.634  
4,84.085,rs10518120,0.633  
4,84.131,rs10518121,0.637  
4,84.192,rs1460001,0.629  
4,84.207,rs10938119,0.626  
4,84.294,rs718607,0.650  
4,84.628,rs4596322,0.662  
4,84.639,rs4333264,0.662  
4,84.700,rs11930214,0.672  
4,84.724,rs7691380,0.678  
4,84.795,rs9307118,0.636  
4,84.865,rs1377028,0.657  
4,84.876,rs896577,0.567

4,84.936,rs16999967,0.613  
4,85.004,rs2060849,0.664  
4,85.128,rs4859933,0.638  
4,85.179,rs1365162,0.540  
4,85.242,rs4859952,0.488  
4,85.255,rs1493716,0.481  
4,85.255,rs17000469,0.481  
4,85.298,rs17000620,0.459  
4,85.300,rs9998529,0.459  
4,85.340,rs4859406,0.412  
4,85.347,rs6827302,0.398  
4,85.359,rs6847598,0.373  
4,85.366,rs1013588,0.409  
4,85.368,rs9998204,0.414  
4,85.378,rs6819442,0.438  
4,85.401,rs12504339,0.508  
4,85.415,rs17001357,0.514  
4,85.454,rs10006043,0.503  
4,85.462,rs17001970,0.459  
4,85.505,rs17002031,0.429  
4,85.515,rs6848817,0.466  
4,85.530,rs9996716,0.479  
4,85.554,rs12503111,0.501  
4,85.674,rs3733242,0.492  
4,85.688,rs4859461,0.456  
4,85.707,rs344108,0.462  
4,85.709,rs11097519,0.438  
4,85.709,rs17324961,0.436  
4,85.716,rs6853653,0.387  
4,85.740,rs17002240,0.327  
4,85.753,rs9307199,0.355  
4,85.756,rs11097539,0.355  
4,85.775,rs1994854,0.326  
4,85.776,rs1108255,0.325  
4,85.796,rs17261150,0.300  
4,85.811,rs6532676,0.302  
4,85.891,rs6847460,0.320  
4,85.907,rs11722689,0.307  
4,85.909,rs2645651,0.305  
4,85.914,rs10009464,0.296  
4,86.023,rs17002332,0.244  
4,86.061,rs4241599,0.227  
4,86.198,rs6849534,0.201  
4,86.264,rs6840204,0.202  
4,86.266,rs11943130,0.202  
4,86.288,rs1009141,0.203  
4,86.319,rs2865830,0.207  
4,86.347,rs736601,0.211  
4,86.499,rs17002597,0.235  
4,86.560,rs13138737,0.245  
4,86.611,rs1348299,0.239  
4,86.675,rs10518178,0.232  
4,86.794,rs355686,0.220  
4,86.797,rs355689,0.219  
4,86.816,rs171388,0.223  
4,86.848,rs17416271,0.228  
4,86.872,rs972755,0.233  
4,86.873,rs4859868,0.233  
4,87.059,rs9307306,0.181  
4,87.292,rs10019920,0.155  
4,87.407,rs1546318,0.142

4,87.437,rs7656678,0.138  
4,87.459,rs4859905,0.132  
4,87.548,rs17420118,0.109  
4,87.551,rs9284618,0.108  
4,87.556,rs10518195,0.108  
4,87.595,rs1017650,0.107  
4,87.625,rs345513,0.106  
4,87.646,rs6835769,0.104  
4,87.715,rs11940606,0.100  
4,87.721,rs931606,0.100  
4,87.806,rs1346145,0.083  
4,87.929,rs13150370,0.050  
4,87.932,rs1480713,0.049  
4,87.987,rs1154761,0.036  
4,88.025,rs1455308,0.046  
4,88.051,rs4975172,0.053  
4,88.089,rs4401473,0.053  
4,88.111,rs10004440,0.052  
4,88.148,rs3924829,0.048  
4,88.246,rs3109164,0.039  
4,88.249,rs7696440,0.039  
4,88.273,rs4455441,0.038  
4,88.303,rs7665764,0.050  
4,88.346,rs6857026,0.038  
4,88.353,rs4690123,0.035  
4,88.418,rs12504282,0.044  
4,88.442,rs4308327,0.047  
4,88.448,rs17004812,0.047  
4,88.450,rs4234850,0.038  
4,88.451,rs10518234,0.048  
4,88.495,rs3733336,0.053  
4,88.508,rs6837827,0.072  
4,88.767,rs12640833,0.079  
4,89.029,rs1052325,0.126  
4,89.033,rs6851598,0.127  
4,89.105,rs2685471,0.124  
4,89.210,rs3733553,0.102  
4,89.251,rs10516652,0.089  
4,89.267,rs1901568,0.085  
4,89.376,rs17005129,0.084  
4,89.387,rs6836031,0.102  
4,89.388,rs17005131,0.102  
4,89.493,rs1373637,0.118  
4,89.508,rs10033009,0.121  
4,89.559,rs7657174,0.115  
4,89.583,rs11099493,0.120  
4,89.620,rs6834681,0.124  
4,89.664,rs9307787,0.114  
4,89.859,rs4693011,0.140  
4,89.934,rs1599650,0.142  
4,89.979,rs11730183,0.140  
4,90.010,rs13109155,0.147  
4,90.183,rs897945,0.204  
4,90.328,rs6853728,0.174  
4,90.420,rs6846520,0.154  
4,90.442,rs2868763,0.151  
4,90.475,rs11940883,0.154  
4,90.529,rs2868760,0.156  
4,90.582,rs6854272,0.160  
4,90.647,rs4693596,0.157  
4,90.715,rs4693608,0.156

4, 90.721, rs7670729, 0.153  
4, 90.769, rs6831788, 0.118  
4, 90.890, rs1494961, 0.100  
4, 90.909, rs17355027, 0.098  
4, 91.149, rs6818782, 0.091  
4, 91.164, rs1458642, 0.091  
4, 91.203, rs1547507, 0.094  
4, 91.220, rs17007149, 0.096  
4, 91.391, rs7679666, 0.103  
4, 91.505, rs17357139, 0.102  
4, 91.525, rs7696864, 0.103  
4, 91.543, rs1988722, 0.083  
4, 91.671, rs2017802, 0.083  
4, 91.690, rs1847819, 0.081  
4, 91.868, rs1343762, 0.057  
4, 92.018, rs4693676, 0.028  
4, 92.181, rs903521, 0.019  
4, 92.358, rs385194, 0.023  
4, 92.681, rs11726635, 0.032  
4, 92.772, rs4533765, 0.029  
4, 92.899, rs6822829, 0.036  
4, 93.062, rs168153, 0.022  
4, 93.075, rs1481775, 0.030  
4, 93.126, rs9307000, 0.026  
4, 93.141, rs6845803, 0.024  
4, 93.154, rs2869356, 0.023  
4, 93.299, rs2869362, 0.010  
4, 93.317, rs1026873, 0.009  
4, 93.536, rs6815441, 0.001  
4, 93.578, rs345367, -0.000  
4, 93.670, rs10032626, 0.001  
4, 93.705, rs7696763, 0.001  
4, 93.877, rs2575676, 0.005  
4, 93.877, rs7438872, 0.005  
4, 93.881, rs4640664, 0.005  
4, 94.036, rs12640395, 0.003  
4, 94.402, rs4608765, 0.004  
4, 94.435, rs10008238, 0.004  
4, 94.760, rs7660964, 0.011  
4, 94.765, rs6855627, 0.011  
4, 94.808, rs10032200, 0.010  
4, 94.809, rs340628, 0.010  
4, 94.995, rs4693811, 0.008  
4, 95.016, rs10022237, 0.007  
4, 95.095, rs6827817, 0.003  
4, 95.176, rs10001608, 0.003  
4, 95.226, rs6822632, 0.003  
4, 95.250, rs3750025, 0.003  
4, 95.250, rs2736982, 0.003  
4, 95.264, rs6532013, 0.003  
4, 95.350, rs7661141, 0.001  
4, 95.380, rs12650760, 0.001  
4, 95.444, rs1026663, 0.002  
4, 95.490, rs1477602, 0.001  
4, 95.499, rs17013569, 0.001  
4, 95.515, rs17013609, 0.001  
4, 95.543, rs2725236, 0.001  
4, 95.566, rs2467052, 0.001  
4, 95.651, rs4148152, 0.000  
4, 95.656, rs2622626, 0.000  
4, 95.733, rs1351441, 0.005

4,95.738,rs11733577,0.006  
4,95.774,rs12641788,0.006  
4,95.786,rs893970,0.006  
4,95.791,rs2869929,0.006  
4,95.805,rs2869928,0.006  
4,95.902,rs4585264,0.001  
4,95.942,rs2717533,0.001  
4,96.317,rs3017925,0.009  
4,96.824,rs9991328,0.017  
4,96.875,rs10516821,0.019  
4,96.982,rs6828137,0.024  
4,97.199,rs678701,0.018  
4,97.200,rs679672,0.018  
4,97.202,rs7674810,0.016  
4,97.279,rs4693223,0.004  
4,97.376,rs6532149,0.008  
4,97.420,rs6830724,0.004  
4,97.424,rs4399946,0.003  
4,97.486,rs1019875,0.003  
4,97.524,rs1560488,0.004  
4,97.564,rs10015406,0.004  
4,97.633,rs17015445,0.005  
4,97.675,rs10516833,0.006  
4,98.004,rs772494,0.006  
4,98.178,rs6847082,0.010  
4,98.186,rs1495552,0.009  
4,98.257,rs4694010,0.005  
4,98.264,rs1495556,0.005  
4,98.275,rs17780881,0.005  
4,98.350,rs3857047,0.008  
4,98.392,rs2736990,0.008  
4,98.439,rs2301134,0.011  
4,98.544,rs11728457,0.009  
4,98.683,rs10013360,0.007  
4,98.724,rs17016737,0.004  
4,98.744,rs4693236,0.003  
4,98.756,rs7688033,0.003  
4,98.830,rs11097253,0.003  
4,98.849,rs2036153,0.003  
4,98.873,rs10003689,0.005  
4,98.892,rs17240838,0.006  
4,98.911,rs950127,0.008  
4,98.912,rs2132834,0.008  
4,98.917,rs1399409,0.007  
4,98.960,rs17017439,0.007  
4,99.046,rs7693519,0.005  
4,99.127,rs17017704,0.004  
4,99.149,rs11725878,0.004  
4,99.243,rs11721809,0.007  
4,99.357,rs6849036,0.015  
4,99.415,rs6819554,0.015  
4,99.418,rs10856881,0.015  
4,99.497,rs6817115,0.016  
4,99.552,rs1541365,0.016  
4,99.631,rs7671793,0.017  
4,99.651,rs1534559,0.019  
4,99.658,rs6815212,0.020  
4,99.707,rs1969531,0.026  
4,99.980,rs17284306,0.019  
4,99.999,rs1516708,0.018  
4,100.153,rs6532345,0.023

4,100.160,rs4128277,0.023  
4,100.162,rs1564958,0.022  
4,100.166,rs970694,0.021  
4,100.173,rs991345,0.020  
4,100.207,rs2199291,0.028  
4,100.222,rs17019342,0.023  
4,100.237,rs7659159,0.018  
4,100.240,rs4692973,0.027  
4,100.308,rs17019988,0.023  
4,100.539,rs1354296,0.012  
4,100.599,rs3796675,0.008  
4,100.668,rs6813949,0.006  
4,100.678,rs1433676,0.006  
4,100.721,rs6834311,0.007  
4,100.940,rs10516928,0.010  
4,100.966,rs6855368,0.005  
4,100.973,rs17020960,0.010  
4,101.070,rs735256,0.008  
4,101.087,rs726899,0.001  
4,101.120,rs7693338,-0.000  
4,101.181,rs1898638,-0.003  
4,101.431,rs7654919,-0.004  
4,101.582,rs4359908,-0.005  
4,101.631,rs2438140,-0.005  
4,101.691,rs17021818,-0.010  
4,101.743,rs1509620,-0.013  
4,101.778,rs7680214,-0.016  
4,101.791,rs6846079,-0.022  
4,101.800,rs1553745,-0.024  
4,101.945,rs1296143,-0.005  
4,101.966,rs1444928,-0.003  
4,101.978,rs6842938,-0.003  
4,102.069,rs1560909,-0.001  
4,102.078,rs3796434,-0.002  
4,102.079,rs1369087,-0.002  
4,102.094,rs3796442,-0.002  
4,102.184,rs17352477,-0.003  
4,102.191,rs6847919,-0.004  
4,102.202,rs11097465,-0.005  
4,102.242,rs1552225,-0.008  
4,102.277,rs1384862,-0.007  
4,102.282,rs6854948,-0.013  
4,102.306,rs4380535,-0.012  
4,102.312,rs13116794,-0.015  
4,102.320,rs9995935,-0.019  
4,102.324,rs265044,-0.022  
4,102.349,rs2629833,-0.041  
4,102.354,rs6532561,-0.041  
4,102.360,rs10003330,-0.041  
4,102.434,rs12499437,-0.044  
4,102.528,rs7692486,-0.049  
4,102.548,rs2196515,-0.052  
4,102.626,rs2014345,-0.061  
4,102.673,rs9997683,-0.072  
4,102.721,rs6824429,-0.077  
4,103.011,rs10033523,-0.076  
4,103.111,rs12509878,-0.069  
4,103.156,rs9993037,-0.071  
4,103.162,rs9994928,-0.071  
4,103.211,rs7659471,-0.089  
4,103.371,rs10516422,-0.075

4,103.400,rs6825634,-0.073  
4,103.444,rs2865798,-0.070  
4,103.485,rs11097573,-0.071  
4,103.647,rs603215,-0.065  
4,103.694,rs2004316,-0.063  
4,103.702,rs4374629,-0.063  
4,103.705,rs10009693,-0.051  
4,103.706,rs10023791,-0.047  
4,103.712,rs10004753,-0.052  
4,103.715,rs6835899,-0.050  
4,103.721,rs17027701,-0.037  
4,103.726,rs1406311,-0.028  
4,103.735,rs17027845,-0.016  
4,103.741,rs10026666,-0.009  
4,103.743,rs10489126,-0.010  
4,103.760,rs1003174,-0.019  
4,103.824,rs971169,-0.018  
4,103.889,rs6532765,-0.017  
4,103.918,rs2903158,-0.017  
4,104.329,rs11939480,-0.011  
4,104.394,rs7670154,-0.010  
4,104.458,rs2602836,-0.009  
4,104.527,rs7678936,-0.009  
4,104.581,rs3857224,-0.008  
4,104.626,rs2173199,-0.008  
4,104.702,rs1159918,-0.012  
4,104.703,rs1229982,-0.012  
4,104.805,rs991316,-0.018  
4,104.815,rs994771,-0.019  
4,104.819,rs284792,-0.016  
4,104.833,rs1154454,-0.007  
4,104.907,rs2119888,-0.009  
4,105.127,rs3816873,-0.007  
4,105.215,rs7659550,-0.008  
4,105.406,rs1108961,-0.013  
4,105.412,rs7666347,-0.013  
4,105.434,rs1426736,-0.013  
4,105.481,rs6831238,-0.013  
4,105.543,rs4699764,-0.014  
4,105.555,rs9307241,-0.013  
4,105.600,rs4699767,-0.013  
4,105.997,rs6854962,-0.015  
4,106.026,rs11097701,-0.018  
4,106.027,rs6820091,-0.018  
4,106.062,rs10026337,-0.016  
4,106.070,rs4235450,-0.015  
4,106.076,rs7659715,-0.015  
4,106.077,rs10000959,-0.015  
4,106.122,rs12647890,-0.009  
4,106.127,rs10516462,-0.009  
4,106.220,rs1392874,-0.006  
4,106.314,rs7691456,-0.005  
4,106.356,rs2089540,-0.005  
4,106.449,rs4698838,-0.006  
4,106.466,rs2645370,-0.007  
4,106.472,rs12649554,-0.007  
4,106.488,rs2851048,-0.006  
4,106.533,rs3804357,-0.005  
4,106.542,rs17030746,-0.005  
4,106.622,rs978373,-0.003  
4,106.629,rs17030994,-0.003



4,106.685,rs17031191,-0.003  
4,106.795,rs1426538,-0.003  
4,106.808,rs10022442,-0.002  
4,106.840,rs11930552,-0.001  
4,106.853,rs12643950,-0.001  
4,106.855,rs17031503,-0.001  
4,106.860,rs7666463,-0.000  
4,106.865,rs2866627,0.000  
4,106.897,rs13149930,0.000  
4,106.930,rs871061,0.000  
4,106.939,rs10003889,0.000  
4,106.947,rs7375516,0.000  
4,106.964,rs10028805,0.000  
4,106.979,rs17031708,0.000  
4,107.024,rs10014485,0.000  
4,107.178,rs190223,-0.001  
4,107.212,rs13126885,-0.002  
4,107.225,rs10014145,-0.002  
4,107.314,rs1314336,-0.003  
4,107.319,rs230489,-0.003  
4,107.380,rs10489114,-0.003  
4,107.392,rs230547,-0.003  
4,107.444,rs17033210,-0.004  
4,107.467,rs223482,-0.005  
4,107.506,rs223366,-0.005  
4,107.737,rs6828829,-0.009  
4,107.846,rs2765,-0.023  
4,107.868,rs3796974,-0.025  
4,107.875,rs3796969,-0.024  
4,107.938,rs233992,-0.021  
4,107.961,rs2189223,-0.023  
4,107.972,rs12502493,-0.024  
4,108.046,rs3857207,-0.049  
4,108.092,rs2866672,-0.035  
4,108.101,rs2951111,-0.033  
4,108.118,rs1406639,-0.054  
4,108.297,rs10002598,-0.052  
4,108.314,rs11933178,-0.052  
4,109.140,rs4129288,-0.037  
4,109.200,rs9998015,-0.030  
4,109.275,rs902444,-0.020  
4,109.355,rs4698931,-0.022  
4,109.542,rs2726503,-0.058  
4,109.611,rs2074396,-0.070  
4,109.662,rs13327958,-0.063  
4,109.666,rs3756258,-0.063  
4,109.675,rs6813330,-0.065  
4,109.689,rs2593305,-0.067  
4,109.951,rs7677557,-0.115  
4,109.966,rs17036413,-0.117  
4,109.986,rs4367177,-0.119  
4,109.987,rs994370,-0.119  
4,109.996,rs10001483,-0.119  
4,110.322,rs10516535,-0.163  
4,110.424,rs1023792,-0.143  
4,110.460,rs13141555,-0.144  
4,110.571,rs12510474,-0.143  
4,110.588,rs11943338,-0.143  
4,110.647,rs433201,-0.107  
4,110.735,rs17584885,-0.107  
4,110.781,rs373586,-0.108

4,110.838,rs2029635,-0.108  
4,110.858,rs959482,-0.105  
4,110.877,rs931481,-0.121  
4,110.923,rs1023514,-0.118  
4,110.966,rs9684679,-0.115  
4,110.969,rs7680755,-0.115  
4,110.981,rs203217,-0.114  
4,111.025,rs10023658,-0.106  
4,111.113,rs932100,-0.094  
4,111.219,rs2189158,-0.092  
4,111.274,rs10008418,-0.094  
4,111.292,rs1389166,-0.099  
4,111.306,rs2087874,-0.095  
4,111.318,rs975219,-0.091  
4,111.335,rs17563597,-0.095  
4,111.456,rs10034874,-0.097  
4,111.495,rs898518,-0.097  
4,111.593,rs4956041,-0.092  
4,111.660,rs7665502,-0.104  
4,111.718,rs220612,-0.109  
4,111.769,rs12374269,-0.117  
4,111.782,rs219467,-0.120  
4,111.792,rs219472,-0.120  
4,111.832,rs219493,-0.114  
4,111.853,rs7667423,-0.134  
4,111.856,rs1452401,-0.132  
4,111.948,rs7688462,-0.153  
4,112.032,rs767062,-0.181  
4,112.105,rs2077246,-0.205  
4,112.141,rs2575657,-0.249  
4,112.142,rs12710996,-0.249  
4,112.158,rs1377210,-0.249  
4,112.196,rs1840063,-0.240  
4,112.306,rs7655700,-0.255  
4,112.384,rs3863122,-0.271  
4,112.408,rs10516554,-0.273  
4,112.418,rs1405160,-0.244  
4,112.440,rs7672923,-0.244  
4,112.468,rs1425353,-0.243  
4,112.476,rs876365,-0.243  
4,112.493,rs17039766,-0.246  
4,112.592,rs17223850,-0.267  
4,112.696,rs1297941,-0.287  
4,112.900,rs1396709,-0.328  
4,113.157,rs1800627,-0.311  
4,113.202,rs2346841,-0.334  
4,113.215,rs6822976,-0.343  
4,113.345,rs17040920,-0.353  
4,113.373,rs7689017,-0.355  
4,113.484,rs2298999,-0.403  
4,113.575,rs2040710,-0.420  
4,113.576,rs10033691,-0.421  
4,113.620,rs1125819,-0.432  
4,113.641,rs6533493,-0.418  
4,113.651,rs6835929,-0.413  
4,113.660,rs6813255,-0.408  
4,113.675,rs17612737,-0.396  
4,113.703,rs6533498,-0.379  
4,113.718,rs12499874,-0.373  
4,113.756,rs1482470,-0.348  
4,113.814,rs244055,-0.347

4,113.826,rs10011752,-0.340  
4,113.853,rs104888888,-0.324  
4,113.857,rs243970,-0.321  
4,113.949,rs17041821,-0.318  
4,113.973,rs939213,-0.316  
4,114.010,rs557785,-0.308  
4,114.153,rs2290105,-0.282  
4,114.227,rs1900829,-0.278  
4,114.344,rs2723296,-0.255  
4,114.373,rs2723313,-0.241  
4,114.485,rs13105878,-0.211  
4,114.500,rs4124159,-0.207  
4,114.504,rs3853444,-0.206  
4,114.543,rs6838973,-0.175  
4,114.584,rs11098092,-0.173  
4,114.621,rs511049,-0.172  
4,114.727,rs7439813,-0.168  
4,114.740,rs11726961,-0.167  
4,114.992,rs297012,-0.166  
4,115.302,rs1546053,-0.208  
4,115.414,rs7694111,-0.223  
4,115.423,rs17043035,-0.220  
4,115.439,rs6826534,-0.218  
4,115.469,rs7692766,-0.212  
4,115.516,rs11727195,-0.210  
4,115.680,rs2654735,-0.248  
4,115.696,rs6830890,-0.254  
4,115.714,rs980387,-0.269  
4,115.749,rs4833869,-0.295  
4,115.843,rs326902,-0.276  
4,116.052,rs6812046,-0.233  
4,116.299,rs9994166,-0.182  
4,116.393,rs17604169,-0.141  
4,116.409,rs17604670,-0.134  
4,116.418,rs17627616,-0.131  
4,116.456,rs6810537,-0.116  
4,116.460,rs17044418,-0.114  
4,116.463,rs2051776,-0.112  
4,116.507,rs4834269,-0.089  
4,116.528,rs2023824,-0.088  
4,116.588,rs2106988,-0.087  
4,116.719,rs1994376,-0.090  
4,116.826,rs17669218,-0.079  
4,116.897,rs1129065,-0.072  
4,117.089,rs10434020,-0.050  
4,117.200,rs4834308,-0.032  
4,117.212,rs12513140,-0.033  
4,117.223,rs7675254,-0.033  
4,117.341,rs6820742,-0.046  
4,117.391,rs1395114,-0.052  
4,117.409,rs313938,-0.063  
4,117.410,rs17045462,-0.063  
4,117.418,rs931838,-0.055  
4,117.450,rs884555,-0.060  
4,117.484,rs313958,-0.085  
4,117.521,rs313960,-0.112  
4,117.522,rs10003143,-0.113  
4,117.561,rs4627864,-0.114  
4,117.566,rs7697503,-0.116  
4,117.596,rs4834321,-0.121  
4,117.707,rs29401,-0.128

4,117.725,rs29327,-0.126  
4,117.781,rs11940206,-0.137  
4,117.862,rs6846326,-0.150  
4,117.885,rs7664824,-0.153  
4,117.887,rs10008952,-0.152  
4,117.924,rs7658972,-0.133  
4,118.001,rs2158196,-0.139  
4,118.233,rs1011973,-0.154  
4,118.334,rs10018022,-0.167  
4,118.342,rs10461151,-0.155  
4,118.353,rs7699538,-0.149  
4,118.357,rs7684832,-0.148  
4,118.377,rs7674158,-0.149  
4,118.390,rs10012647,-0.158  
4,118.392,rs766183,-0.159  
4,118.393,rs11098213,-0.160  
4,118.430,rs10020382,-0.177  
4,118.467,rs6851287,-0.186  
4,118.506,rs4549468,-0.210  
4,118.511,rs11098234,-0.211  
4,118.525,rs4458522,-0.257  
4,118.526,rs4989308,-0.260  
4,118.537,rs4834403,-0.251  
4,118.573,rs11722041,-0.248  
4,118.605,rs17678877,-0.264  
4,118.675,rs6533817,-0.318  
4,118.723,rs13120543,-0.376  
4,118.749,rs1036757,-0.386  
4,118.754,rs10516608,-0.389  
4,118.797,rs1383001,-0.398  
4,119.114,rs9884192,-0.367  
4,119.517,rs4566724,-0.354  
4,119.865,rs13112862,-0.351  
4,119.985,rs1549805,-0.351  
4,120.156,rs2045320,-0.329  
4,120.264,rs701779,-0.331  
4,120.333,rs1506732,-0.335  
4,120.499,rs10428494,-0.373  
4,120.537,rs1873103,-0.383  
4,120.650,rs6533974,-0.397  
4,120.756,rs10033111,-0.362  
4,120.855,rs12649613,-0.349  
4,120.919,rs1438217,-0.388  
4,120.941,rs2196712,-0.395  
4,121.040,rs10033190,-0.367  
4,121.041,rs6853512,-0.367  
4,121.083,rs13138792,-0.413  
4,121.095,rs7695817,-0.426  
4,121.117,rs4240307,-0.444  
4,121.128,rs11932518,-0.434  
4,121.139,rs6827477,-0.423  
4,121.142,rs12510650,-0.422  
4,121.163,rs6829877,-0.389  
4,121.193,rs1352573,-0.358  
4,121.211,rs2220497,-0.350  
4,121.290,rs4585377,-0.295  
4,121.401,rs9997637,-0.271  
4,121.415,rs10857057,-0.270  
4,121.501,rs10028343,-0.266  
4,121.519,rs631271,-0.271  
4,121.591,rs12504468,-0.285

4,121.647,rs2035600,-0.291  
4,121.805,rs11730732,-0.323  
4,121.827,rs11940444,-0.320  
4,121.856,rs1021377,-0.322  
4,121.870,rs9307465,-0.318  
4,121.888,rs1380158,-0.322  
4,121.892,rs1459056,-0.375  
4,121.895,rs6828669,-0.344  
4,121.903,rs10518313,-0.356  
4,121.911,rs1058450,-0.368  
4,121.942,rs2168987,-0.429  
4,121.943,rs11934309,-0.429  
4,122.126,rs6843229,-0.426  
4,122.290,rs1124166,-0.415  
4,122.299,rs1032818,-0.418  
4,122.349,rs1503535,-0.450  
4,122.364,rs17008785,-0.417  
4,122.405,rs972311,-0.424  
4,122.494,rs2715970,-0.415  
4,122.510,rs6850328,-0.416  
4,122.557,rs1808015,-0.417  
4,122.562,rs7667780,-0.415  
4,122.571,rs1685593,-0.412  
4,122.612,rs2390022,-0.470  
4,122.621,rs12511769,-0.478  
4,122.627,rs1532055,-0.483  
4,122.653,rs17051145,-0.486  
4,122.656,rs7693486,-0.485  
4,122.702,rs10518377,-0.481  
4,122.800,rs6534216,-0.444  
4,122.825,rs343202,-0.443  
4,122.877,rs6848268,-0.467  
4,122.911,rs6855437,-0.493  
4,122.974,rs11931196,-0.476  
4,122.981,rs882045,-0.474  
4,123.020,rs1397643,-0.478  
4,123.116,rs6835704,-0.505  
4,123.126,rs7671286,-0.500  
4,123.147,rs9997417,-0.484  
4,123.153,rs13128635,-0.485  
4,123.220,rs13110590,-0.486  
4,123.297,rs10010505,-0.539  
4,123.315,rs692157,-0.551  
4,123.323,rs13123059,-0.553  
4,123.362,rs1016802,-0.564  
4,123.393,rs982887,-0.566  
4,123.483,rs17449954,-0.540  
4,123.488,rs2306416,-0.538  
4,123.508,rs6838346,-0.493  
4,123.509,rs4833765,-0.494  
4,123.525,rs4833233,-0.462  
4,123.554,rs769240,-0.472  
4,123.616,rs950574,-0.490  
4,123.627,rs4001038,-0.493  
4,123.633,rs1358229,-0.505  
4,123.639,rs11098654,-0.499  
4,123.675,rs6840372,-0.535  
4,123.888,rs10857092,-0.470  
4,123.891,rs6848139,-0.470  
4,123.956,rs975405,-0.470  
4,123.970,rs4295278,-0.478

4,123.975,rs2137497,-0.481  
4,124.032,rs4833844,-0.509  
4,124.086,rs308435,-0.504  
4,124.087,rs308439,-0.504  
4,124.192,rs11731720,-0.468  
4,124.329,rs2589850,-0.535  
4,124.681,rs1425416,-0.618  
4,124.693,rs1834378,-0.621  
4,124.764,rs3113392,-0.630  
4,124.841,rs1519225,-0.648  
4,124.959,rs960925,-0.658  
4,124.967,rs11937163,-0.659  
4,125.060,rs1159819,-0.661  
4,125.145,rs312493,-0.665  
4,125.153,rs975107,-0.628  
4,125.160,rs4423888,-0.596  
4,125.165,rs491645,-0.613  
4,125.171,rs508410,-0.663  
4,125.174,rs7677431,-0.678  
4,125.183,rs12649449,-0.713  
4,125.187,rs1390079,-0.717  
4,125.266,rs1498016,-0.725  
4,125.305,rs10029225,-0.718  
4,125.348,rs9993168,-0.795  
4,125.374,rs1483599,-0.803  
4,125.388,rs17008912,-0.807  
4,125.421,rs1498040,-0.817  
4,125.424,rs1532492,-0.821  
4,125.535,rs7685639,-0.997  
4,125.538,rs17009332,-1.034  
4,125.574,rs2940781,-1.158  
4,125.589,rs2710572,-1.282  
4,125.605,rs17800919,-1.313  
4,125.608,rs17009497,-1.307  
4,125.615,rs2710560,-1.292  
4,125.629,rs1912043,-1.304  
4,125.663,rs9968420,-1.333  
4,125.702,rs1532883,-1.304  
4,125.710,rs1567049,-1.274  
4,125.734,rs6818629,-1.257  
4,125.742,rs6534494,-1.268  
4,125.748,rs4507376,-1.276  
4,125.753,rs1864363,-1.281  
4,125.771,rs6836731,-1.348  
4,125.858,rs7678929,-1.311  
4,125.873,rs6841080,-1.275  
4,125.883,rs4590050,-1.251  
4,125.922,rs2135365,-1.256  
4,125.963,rs11098847,-1.254  
4,126.082,rs2390992,-1.180  
4,126.155,rs1320244,-1.021  
4,126.168,rs6827629,-1.020  
4,126.189,rs7694254,-0.952  
4,126.212,rs12647099,-0.909  
4,126.222,rs1396529,-0.931  
4,126.234,rs1508986,-0.945  
4,126.265,rs6820022,-0.952  
4,126.325,rs7681514,-0.993  
4,126.425,rs4834142,-0.923  
4,126.759,rs13149390,-0.929  
4,126.781,rs724950,-0.929

4,126.820,rs2002543,-0.945  
4,126.905,rs2255457,-0.996  
4,127.077,rs11940642,-1.092  
4,127.320,rs4975181,-1.196  
4,127.437,rs6843137,-1.199  
4,127.454,rs7678706,-1.188  
4,127.458,rs12510203,-1.184  
4,127.488,rs1216405,-1.172  
4,127.512,rs1615523,-1.259  
4,127.516,rs17013522,-1.256  
4,127.559,rs13147397,-1.225  
4,127.576,rs6820206,-1.212  
4,127.578,rs17013657,-1.209  
4,127.591,rs11098986,-1.214  
4,127.625,rs4975270,-1.157  
4,127.790,rs1867951,-1.122  
4,127.844,rs7659741,-1.110  
4,127.864,rs6842443,-1.093  
4,127.881,rs6534714,-1.068  
4,127.917,rs4334769,-1.015  
4,127.965,rs10001834,-1.000  
4,128.023,rs600121,-1.032  
4,128.080,rs628527,-1.122  
4,128.091,rs1507787,-1.199  
4,128.173,rs7656732,-1.229  
4,128.175,rs6827503,-1.229  
4,128.187,rs13106127,-1.240  
4,128.285,rs4383635,-1.302  
4,128.291,rs10518570,-1.243  
4,128.549,rs2926412,-1.263  
4,128.691,rs1304183,-1.294  
4,128.762,rs931418,-1.307  
4,128.780,rs306364,-1.307  
4,128.899,rs717469,-1.269  
4,128.916,rs1478095,-1.264  
4,128.942,rs4864021,-1.261  
4,129.087,rs7692456,-1.255  
4,129.123,rs1353346,-1.243  
4,129.353,rs6811541,-1.162  
4,129.526,rs350951,-1.231  
4,129.725,rs2863673,-1.286  
4,129.858,rs17547161,-1.344  
4,130.026,rs348071,-1.377  
4,130.296,rs13147558,-1.394  
4,130.481,rs9999397,-1.356  
4,130.510,rs9996230,-1.363  
4,130.570,rs12501689,-1.342  
4,130.609,rs978335,-1.352  
4,130.782,rs7685353,-1.567  
4,130.816,rs1396009,-1.613  
4,130.876,rs976259,-1.675  
4,130.877,rs11936591,-1.675  
4,130.916,rs10213462,-1.697  
4,131.028,rs1389331,-1.756  
4,131.035,rs7679087,-1.760  
4,131.068,rs7375925,-1.782  
4,131.150,rs903092,-1.871  
4,131.340,rs7668810,-2.045  
4,131.372,rs10006443,-1.989  
4,131.551,rs1495000,-1.989  
4,131.599,rs6535038,-1.651

4,131.601,rs10519337,-1.644  
4,131.616,rs13144694,-1.664  
4,131.627,rs10034996,-1.643  
4,131.628,rs6856596,-1.640  
4,131.629,rs6813668,-1.636  
4,131.652,rs9998469,-1.592  
4,131.730,rs4527530,-1.390  
4,131.742,rs4565135,-1.339  
4,131.768,rs6856823,-1.266  
4,131.876,rs17637542,-1.169  
4,132.020,rs11099340,-1.239  
4,132.140,rs12503254,-1.194  
4,132.205,rs7666345,-1.171  
4,132.237,rs1504865,-1.105  
4,132.492,rs11733579,-0.940  
4,132.573,rs10013192,-0.877  
4,132.721,rs6857747,-0.815  
4,132.746,rs1558514,-0.859  
4,132.806,rs4864340,-0.829  
4,132.839,rs1476909,-0.831  
4,132.868,rs1860966,-0.800  
4,132.908,rs4315856,-0.759  
4,132.971,rs12509396,-0.726  
4,132.972,rs2406020,-0.725  
4,133.021,rs7658823,-0.640  
4,133.025,rs10519394,-0.638  
4,133.049,rs7658630,-0.627  
4,133.053,rs6832309,-0.620  
4,133.105,rs10016963,-0.637  
4,133.174,rs6842060,-0.611  
4,133.209,rs7685312,-0.641  
4,133.218,rs10007934,-0.653  
4,133.262,rs1400918,-0.713  
4,133.305,rs679959,-0.722  
4,133.332,rs515800,-0.700  
4,133.359,rs11735377,-0.650  
4,133.420,rs17049362,-0.626  
4,133.525,rs6816675,-0.636  
4,133.574,rs987360,-0.653  
4,133.624,rs6811274,-0.649  
4,133.668,rs5020420,-0.646  
4,133.698,rs2406747,-0.626  
4,133.709,rs7679076,-0.620  
4,133.718,rs2406756,-0.666  
4,133.814,rs4478233,-0.694  
4,133.853,rs6841316,-0.727  
4,133.855,rs4863773,-0.682  
4,133.912,rs3843891,-0.646  
4,134.083,rs6855385,-0.656  
4,134.208,rs7699316,-0.642  
4,134.263,rs11734678,-0.619  
4,134.396,rs7685529,-0.594  
4,134.416,rs11737641,-0.591  
4,134.422,rs7687419,-0.596  
4,134.424,rs11726463,-0.598  
4,134.429,rs1513765,-0.611  
4,134.456,rs6537323,-0.741  
4,134.461,rs7657780,-0.748  
4,134.486,rs7682572,-0.738  
4,134.531,rs6857347,-0.671  
4,134.547,rs4863797,-0.648



4,134.568,rs17050398,-0.667  
4,134.602,rs6818743,-0.695  
4,134.640,rs299113,-0.678  
4,134.826,rs6853222,-0.660  
4,134.955,rs12644755,-0.710  
4,135.004,rs1450453,-0.729  
4,135.155,rs1450454,-0.727  
4,135.232,rs1450449,-0.779  
4,135.273,rs12501270,-0.775  
4,135.284,rs7692637,-0.774  
4,135.369,rs7686170,-0.696  
4,135.375,rs11736543,-0.689  
4,135.387,rs1948898,-0.696  
4,135.419,rs4481278,-0.729  
4,135.440,rs7669416,-0.740  
4,135.486,rs4639023,-0.801  
4,135.494,rs6823019,-0.805  
4,135.500,rs4241923,-0.809  
4,135.562,rs6817458,-0.816  
4,135.734,rs11941589,-0.778  
4,135.750,rs6820313,-0.779  
4,135.780,rs2029288,-0.790  
4,136.034,rs1995103,-0.920  
4,136.060,rs706313,-0.958  
4,136.078,rs7689415,-0.982  
4,136.087,rs2602248,-0.993  
4,136.105,rs17050838,-0.980  
4,136.133,rs795602,-1.016  
4,136.146,rs8192049,-1.027  
4,136.148,rs795589,-1.028  
4,136.154,rs8192081,-1.008  
4,136.156,rs13124794,-1.001  
4,136.182,rs345983,-0.922  
4,136.214,rs4863683,-0.902  
4,136.228,rs6835277,-0.859  
4,136.229,rs6816973,-0.858  
4,136.231,rs932012,-0.860  
4,136.232,rs11100269,-0.861  
4,136.265,rs795992,-0.835  
4,136.304,rs2667364,-0.854  
4,136.322,rs795981,-0.841  
4,136.334,rs10029731,-0.825  
4,136.349,rs17005223,-0.817  
4,136.362,rs13127289,-0.866  
4,136.588,rs7656823,-0.859  
4,136.625,rs4863721,-0.863  
4,136.836,rs6851301,-0.890  
4,136.851,rs6828897,-0.890  
4,136.880,rs1402669,-0.865  
4,136.937,rs6817684,-0.897  
4,136.953,rs1546716,-0.916  
4,136.955,rs6820015,-0.915  
4,136.964,rs2139926,-0.915  
4,136.986,rs1464434,-0.957  
4,136.997,rs6822207,-0.977  
4,137.020,rs6536733,-0.977  
4,137.102,rs6816957,-0.984  
4,137.232,rs4362897,-1.002  
4,137.353,rs3104107,-1.003  
4,137.404,rs12509905,-1.002  
4,137.441,rs10002459,-1.002

4,137.454,rs17392415,-1.003  
4,137.507,rs10004266,-1.004  
4,137.526,rs1532013,-1.057  
4,137.571,rs7663798,-1.040  
4,137.575,rs11731148,-1.090  
4,137.577,rs1863307,-1.088  
4,137.579,rs874776,-1.100  
4,137.650,rs6814533,-1.121  
4,137.651,rs1425443,-1.120  
4,137.809,rs17425634,-1.005  
4,137.865,rs9991795,-0.967  
4,137.892,rs2042630,-0.954  
4,137.905,rs4956344,-1.003  
4,137.955,rs3851433,-1.022  
4,137.982,rs11100704,-1.021  
4,138.134,rs4956520,-0.977  
4,138.348,rs7672861,-0.968  
4,138.354,rs1012864,-0.970  
4,138.415,rs6840028,-0.991  
4,138.620,rs6825690,-0.967  
4,138.674,rs1561152,-0.970  
4,138.736,rs1057260,-1.024  
4,139.012,rs1519551,-0.995  
4,139.110,rs9990563,-0.980  
4,139.160,rs10018731,-0.968  
4,139.368,rs336355,-0.891  
4,139.540,rs2627804,-0.828  
4,139.625,rs2636638,-0.750  
4,139.629,rs2636670,-0.747  
4,139.686,rs4956319,-0.785  
4,139.712,rs1982965,-0.801  
4,139.807,rs1425531,-0.784  
4,139.829,rs975136,-0.734  
4,139.978,rs13133181,-0.704  
4,140.086,rs2575570,-0.598  
4,140.112,rs2306924,-0.592  
4,140.152,rs11100863,-0.556  
4,140.544,rs11736535,-0.350  
4,140.582,rs4835001,-0.299  
4,140.595,rs10006257,-0.303  
4,140.607,rs4373182,-0.285  
4,140.633,rs11931253,-0.316  
4,140.635,rs1489152,-0.316  
4,140.636,rs1596480,-0.347  
4,140.639,rs568752,-0.320  
4,140.666,rs2044276,-0.323  
4,140.695,rs1992598,-0.320  
4,140.722,rs13109195,-0.317  
4,140.814,rs11939979,-0.310  
4,140.875,rs4835014,-0.345  
4,140.904,rs7678910,-0.362  
4,140.930,rs9999510,-0.397  
4,140.941,rs3935131,-0.402  
4,140.968,rs11939704,-0.418  
4,141.015,rs17020623,-0.422  
4,141.029,rs988163,-0.420  
4,141.041,rs6814298,-0.428  
4,141.070,rs13119482,-0.457  
4,141.079,rs12332040,-0.459  
4,141.108,rs6537382,-0.458  
4,141.111,rs6537383,-0.460

4,141.135,rs7660035,-0.441  
4,141.181,rs13125215,-0.349  
4,141.207,rs6845844,-0.327  
4,141.236,rs10012073,-0.327  
4,141.428,rs1864372,-0.315  
4,141.768,rs6537420,-0.295  
4,141.916,rs1504355,-0.291  
4,141.974,rs7680105,-0.290  
4,142.635,rs1370301,-0.279  
4,142.704,rs1507500,-0.273  
4,143.285,rs1400558,-0.230  
4,143.405,rs5334,-0.203  
4,143.463,rs4110,-0.201  
4,143.480,rs10028794,-0.201  
4,143.497,rs4835438,-0.200  
4,143.564,rs17475359,-0.203  
4,143.911,rs11734619,-0.219  
4,143.974,rs4027115,-0.218  
4,144.051,rs17024235,-0.232  
4,144.107,rs10003349,-0.265  
4,144.191,rs2276932,-0.268  
4,144.196,rs7660368,-0.270  
4,144.238,rs1879829,-0.299  
4,144.241,rs1403143,-0.299  
4,144.260,rs10519942,-0.298  
4,144.272,rs6535594,-0.318  
4,144.273,rs17483979,-0.320  
4,144.277,rs3910044,-0.331  
4,144.294,rs10012553,-0.341  
4,144.313,rs3920217,-0.355  
4,144.336,rs1512327,-0.347  
4,144.345,rs4635799,-0.369  
4,144.374,rs2200984,-0.363  
4,144.384,rs17024762,-0.371  
4,144.421,rs7437928,-0.397  
4,144.427,rs2358469,-0.395  
4,144.436,rs4835530,-0.392  
4,144.468,rs517151,-0.379  
4,144.503,rs2520496,-0.402  
4,144.512,rs12374234,-0.420  
4,144.546,rs6839286,-0.467  
4,144.550,rs4259038,-0.470  
4,144.602,rs13435568,-0.472  
4,144.633,rs546978,-0.473  
4,144.740,rs6814124,-0.482  
4,144.771,rs17502597,-0.494  
4,144.829,rs10008520,-0.471  
4,144.851,rs4835604,-0.462  
4,144.852,rs1505469,-0.462  
4,144.855,rs17631619,-0.462  
4,144.885,rs4501203,-0.459  
4,144.887,rs4260523,-0.458  
4,144.896,rs6833562,-0.459  
4,144.898,rs7655571,-0.459  
4,144.915,rs4270569,-0.462  
4,144.987,rs1993656,-0.509  
4,145.080,rs1875899,-0.463  
4,145.089,rs1504786,-0.457  
4,145.191,rs2407167,-0.463  
4,145.192,rs10520104,-0.463  
4,145.202,rs10033020,-0.462

4,145.441,rs6535818,-0.436  
4,145.539,rs6835546,-0.425  
4,145.542,rs7657092,-0.425  
4,145.599,rs7658783,-0.430  
4,145.628,rs17360838,-0.433  
4,145.652,rs1364870,-0.436  
4,145.789,rs4466023,-0.472  
4,145.791,rs17361412,-0.473  
4,145.822,rs11737308,-0.478  
4,145.860,rs2406623,-0.472  
4,145.881,rs6838430,-0.475  
4,145.947,rs2714805,-0.468  
4,146.133,rs7695877,-0.478  
4,146.154,rs12642676,-0.466  
4,146.155,rs4696332,-0.465  
4,146.160,rs3935569,-0.393  
4,146.167,rs6814401,-0.407  
4,146.178,rs4447840,-0.380  
4,146.179,rs10010565,-0.378  
4,146.195,rs6857876,-0.343  
4,146.207,rs4513549,-0.339  
4,146.241,rs12500918,-0.326  
4,146.282,rs7699456,-0.331  
4,146.407,rs11737767,-0.350  
4,146.424,rs12512990,-0.414  
4,146.438,rs1878284,-0.436  
4,146.459,rs13138175,-0.393  
4,146.472,rs1516692,-0.366  
4,146.489,rs7683508,-0.375  
4,146.490,rs2090380,-0.375  
4,146.495,rs6858521,-0.374  
4,146.501,rs12641081,-0.382  
4,146.517,rs1516689,-0.415  
4,146.561,rs4323085,-0.382  
4,146.753,rs4696428,-0.440  
4,146.925,rs6817587,-0.468  
4,147.022,rs9997214,-0.478  
4,147.477,rs893805,-0.494  
4,147.801,rs6841435,-0.495  
4,148.084,rs13119846,-0.470  
4,148.205,rs10034657,-0.471  
4,148.214,rs6848033,-0.471  
4,148.307,rs1063151,-0.436  
4,148.318,rs6821970,-0.412  
4,148.344,rs2241839,-0.361  
4,148.477,rs1816702,-0.366  
4,148.601,rs17030417,-0.393  
4,148.726,rs11723258,-0.422  
4,148.805,rs954368,-0.421  
4,148.845,rs5009912,-0.420  
4,148.998,rs10024897,-0.414  
4,149.039,rs1878449,-0.414  
4,149.140,rs2897074,-0.447  
4,149.175,rs6858076,-0.443  
4,149.187,rs4696526,-0.442  
4,149.210,rs6835823,-0.440  
4,149.267,rs9307919,-0.433  
4,149.281,rs10005886,-0.427  
4,149.376,rs2014131,-0.391  
4,149.416,rs10028852,-0.416  
4,149.466,rs4432731,-0.412

4,149.701,rs12500437,-0.386  
4,149.736,rs2896868,-0.378  
4,149.742,rs1907155,-0.377  
4,149.773,rs7689945,-0.374  
4,149.802,rs1800792,-0.363  
4,149.807,rs13137121,-0.355  
4,149.844,rs727153,-0.284  
4,149.862,rs156550,-0.244  
4,149.882,rs17302908,-0.220  
4,149.890,rs1500387,-0.212  
4,149.902,rs17032207,-0.209  
4,149.927,rs4691555,-0.185  
4,149.941,rs6829756,-0.202  
4,149.967,rs17032433,-0.198  
4,149.995,rs6848512,-0.211  
4,150.036,rs2880414,-0.221  
4,150.054,rs13152353,-0.224  
4,150.219,rs908590,-0.248  
4,150.244,rs4691626,-0.252  
4,150.293,rs7442312,-0.257  
4,150.355,rs6850722,-0.272  
4,150.394,rs2625248,-0.285  
4,150.425,rs7692799,-0.277  
4,150.442,rs6841458,-0.268  
4,150.451,rs3806776,-0.264  
4,150.495,rs3796585,-0.220  
4,150.523,rs4691073,-0.192  
4,150.546,rs3796570,-0.178  
4,150.585,rs6536096,-0.173  
4,150.650,rs3775085,-0.186  
4,150.671,rs13128945,-0.191  
4,150.692,rs12510557,-0.196  
4,150.906,rs4437204,-0.223  
4,150.918,rs4558821,-0.226  
4,150.966,rs6419277,-0.231  
4,151.046,rs2340252,-0.265  
4,151.084,rs2879724,-0.293  
4,151.183,rs10030326,-0.297  
4,151.275,rs13147212,-0.331  
4,151.321,rs10517637,-0.321  
4,151.325,rs6818354,-0.320  
4,151.333,rs10517636,-0.353  
4,151.403,rs13435328,-0.357  
4,151.462,rs10517643,-0.366  
4,151.600,rs11943855,-0.385  
4,151.642,rs4691370,-0.392  
4,151.649,rs7684999,-0.393  
4,151.657,rs10030015,-0.394  
4,151.709,rs1469245,-0.406  
4,151.777,rs11100096,-0.378  
4,151.790,rs7655209,-0.373  
4,152.120,rs12507865,-0.335  
4,152.160,rs17036351,-0.295  
4,152.163,rs1434384,-0.295  
4,152.175,rs1036342,-0.295  
4,152.333,rs756334,-0.318  
4,152.370,rs6812217,-0.307  
4,152.373,rs7677854,-0.305  
4,152.456,rs17210208,-0.269  
4,152.469,rs721604,-0.263  
4,152.558,rs4569796,-0.275

4,152.670,rs13126054,-0.237  
4,152.694,rs12510198,-0.268  
4,152.717,rs1328925,-0.270  
4,152.812,rs6536309,-0.281  
4,153.261,rs7670689,-0.255  
4,153.280,rs714462,-0.254  
4,153.346,rs6849580,-0.260  
4,153.377,rs581849,-0.261  
4,153.683,rs2016061,-0.254  
4,153.744,rs6812880,-0.285  
4,153.761,rs11100229,-0.293  
4,153.847,rs2851798,-0.279  
4,153.898,rs2348414,-0.282  
4,153.916,rs9994725,-0.295  
4,153.950,rs1502752,-0.321  
4,153.969,rs6536489,-0.326  
4,154.003,rs17326199,-0.305  
4,154.037,rs1950167,-0.307  
4,154.070,rs953014,-0.327  
4,154.072,rs12374311,-0.326  
4,154.074,rs11939980,-0.325  
4,154.087,rs12503435,-0.314  
4,154.094,rs294526,-0.312  
4,154.098,rs1946867,-0.312  
4,154.114,rs4691655,-0.308  
4,154.145,rs13136944,-0.301  
4,154.171,rs1439395,-0.295  
4,154.183,rs13140082,-0.293  
4,154.301,rs4691703,-0.290  
4,154.314,rs17040262,-0.286  
4,154.327,rs4273418,-0.288  
4,154.374,rs12503470,-0.238  
4,154.398,rs4467511,-0.216  
4,154.522,rs4591550,-0.203  
4,154.735,rs6536577,-0.178  
4,154.919,rs1348530,-0.166  
4,154.978,rs13106146,-0.169  
4,155.018,rs1017543,-0.158  
4,155.049,rs12512282,-0.123  
4,155.058,rs6857927,-0.122  
4,155.198,rs4547755,-0.114  
4,155.269,rs7669737,-0.103  
4,155.383,rs6842030,-0.107  
4,155.537,rs4330312,-0.087  
4,155.545,rs10003025,-0.068  
4,155.619,rs2082669,-0.124  
4,155.620,rs1946656,-0.125  
4,155.654,rs359502,-0.113  
4,155.670,rs45426,-0.108  
4,155.691,rs4343679,-0.112  
4,155.698,rs13141291,-0.120  
4,155.703,rs4440177,-0.126  
4,155.709,rs7697133,-0.102  
4,155.721,rs921344,-0.095  
4,155.744,rs11931857,-0.109  
4,155.768,rs1450394,-0.133  
4,155.776,rs10021001,-0.141  
4,155.790,rs2045631,-0.157  
4,155.809,rs10428343,-0.150  
4,155.961,rs995302,-0.151  
4,156.018,rs10007144,-0.143

4,156.066,rs6847504,-0.131  
4,156.098,rs4263350,-0.124  
4,156.147,rs4132177,-0.135  
4,156.154,rs4301068,-0.138  
4,156.173,rs2320331,-0.130  
4,156.454,rs10001148,-0.112  
4,156.489,rs12644622,-0.121  
4,156.707,rs11945307,-0.156  
4,156.764,rs4057791,-0.163  
4,157.007,rs11931331,-0.180  
4,157.020,rs2320767,-0.180  
4,157.148,rs9993575,-0.215  
4,157.183,rs11100508,-0.253  
4,157.292,rs10030322,-0.265  
4,157.295,rs7686154,-0.265  
4,157.343,rs17044007,-0.265  
4,157.562,rs1038975,-0.260  
4,157.692,rs10517791,-0.205  
4,157.693,rs978402,-0.232  
4,157.760,rs6536757,-0.176  
4,157.775,rs4267695,-0.174  
4,158.008,rs2001227,-0.138  
4,158.139,rs2321305,-0.128  
4,158.278,rs4502640,-0.125  
4,158.318,rs2321373,-0.124  
4,158.453,rs7675835,-0.123  
4,158.593,rs6835711,-0.122  
4,158.850,rs6536824,-0.101  
4,158.884,rs1110968,-0.092  
4,158.922,rs1534578,-0.083  
4,159.001,rs9991808,-0.078  
4,159.129,rs17485743,-0.079  
4,159.143,rs1113272,-0.079  
4,159.163,rs12502646,-0.079  
4,159.230,rs13113465,-0.069  
4,159.278,rs4572830,-0.080  
4,159.321,rs4234980,-0.089  
4,159.323,rs10034282,-0.089  
4,159.345,rs4593087,-0.090  
4,159.424,rs7691785,-0.077  
4,159.438,rs6846439,-0.077  
4,159.446,rs6854993,-0.077  
4,159.530,rs9762579,-0.067  
4,159.676,rs12503351,-0.039  
4,159.693,rs6848914,-0.036  
4,159.706,rs4691148,-0.035  
4,159.775,rs4690801,-0.042  
4,159.788,rs2056255,-0.044  
4,159.813,rs1877536,-0.044  
4,159.982,rs12330937,-0.041  
4,160.171,rs1583645,-0.039  
4,160.189,rs2322291,-0.038  
4,160.319,rs11730342,-0.040  
4,160.361,rs2280322,-0.052  
4,160.384,rs2033765,-0.059  
4,160.458,rs7662154,-0.058  
4,160.522,rs1599115,-0.078  
4,160.579,rs2611209,-0.084  
4,160.598,rs2714807,-0.083  
4,160.600,rs17688688,-0.083  
4,160.621,rs4691215,-0.085

4,160.653,rs2611251,-0.090  
4,160.662,rs2714850,-0.090  
4,160.719,rs191644,-0.089  
4,160.774,rs11100620,-0.096  
4,160.849,rs1018139,-0.088  
4,160.853,rs7654070,-0.108  
4,160.891,rs1503294,-0.106  
4,160.932,rs17590344,-0.088  
4,160.976,rs1826956,-0.084  
4,161.002,rs6825989,-0.063  
4,161.022,rs13112070,-0.055  
4,161.158,rs410627,-0.071  
4,161.258,rs1492524,-0.089  
4,161.325,rs7439050,-0.094  
4,161.355,rs6536987,-0.098  
4,161.441,rs10009186,-0.168  
4,161.481,rs6817936,-0.201  
4,161.549,rs7672200,-0.217  
4,161.589,rs10020692,-0.240  
4,161.732,rs815212,-0.297  
4,161.881,rs10008779,-0.338  
4,161.964,rs2706845,-0.433  
4,161.974,rs2169736,-0.452  
4,161.992,rs17053332,-0.500  
4,162.004,rs1878685,-0.538  
4,162.023,rs1401014,-0.563  
4,162.048,rs12645719,-0.606  
4,162.063,rs6816694,-0.590  
4,162.070,rs11730375,-0.551  
4,162.313,rs1847688,-0.557  
4,162.341,rs7682960,-0.580  
4,162.358,rs2166186,-0.596  
4,162.380,rs13140875,-0.613  
4,162.428,rs304341,-0.621  
4,162.644,rs13133439,-0.720  
4,162.648,rs12509086,-0.722  
4,162.728,rs2319850,-0.752  
4,162.806,rs2634959,-0.782  
4,162.830,rs17650332,-0.778  
4,162.839,rs11132268,-0.777  
4,162.925,rs6857016,-0.791  
4,162.964,rs17650886,-0.787  
4,163.024,rs2723687,-0.765  
4,163.044,rs2723696,-0.765  
4,163.095,rs4314247,-0.668  
4,163.099,rs6846708,-0.668  
4,163.101,rs12649186,-0.663  
4,163.112,rs11933816,-0.635  
4,163.119,rs6832582,-0.613  
4,163.173,rs4635780,-0.591  
4,163.266,rs2247733,-0.476  
4,163.273,rs999958,-0.468  
4,163.374,rs973990,-0.480  
4,163.379,rs7688533,-0.480  
4,163.434,rs12643097,-0.476  
4,163.650,rs17054666,-0.373  
4,163.710,rs2706740,-0.346  
4,163.742,rs2660416,-0.338  
4,163.761,rs7698807,-0.334  
4,163.913,rs6815837,-0.326  
4,164.581,rs10520163,-0.285



4,164.666,rs13122912,-0.267  
4,164.735,rs11132816,-0.249  
4,164.769,rs1995305,-0.250  
4,164.812,rs10015829,-0.252  
4,164.832,rs4692758,-0.253  
4,164.917,rs12643868,-0.261  
4,165.206,rs2466990,-0.289  
4,165.270,rs11736939,-0.289  
4,165.293,rs12510576,-0.289  
4,165.347,rs3846272,-0.289  
4,165.499,rs1717072,-0.314  
4,165.538,rs4692824,-0.322  
4,165.551,rs2141473,-0.321  
4,165.610,rs2661079,-0.323  
4,165.824,rs2082317,-0.255  
4,165.931,rs11731647,-0.206  
4,165.981,rs7673719,-0.185  
4,166.154,rs3913195,-0.165  
4,166.192,rs4144862,-0.161  
4,166.246,rs11939052,-0.164  
4,166.304,rs9312509,-0.177  
4,166.371,rs1907084,-0.165  
4,166.671,rs4692643,-0.225  
4,166.805,rs983560,-0.254  
4,166.833,rs7654286,-0.259  
4,166.856,rs1394859,-0.262  
4,166.894,rs2131002,-0.268  
4,167.101,rs6843010,-0.290  
4,167.244,rs1484019,-0.282  
4,167.347,rs10019934,-0.269  
4,167.478,rs4695771,-0.277  
4,167.639,rs17058946,-0.285  
4,167.645,rs1824347,-0.285  
4,167.677,rs6810619,-0.310  
4,167.734,rs2653841,-0.313  
4,167.795,rs10020676,-0.306  
4,167.869,rs6856402,-0.284  
4,167.947,rs10213525,-0.251  
4,167.951,rs7670064,-0.249  
4,168.030,rs7665469,-0.206  
4,168.065,rs4696060,-0.175  
4,168.070,rs7655786,-0.171  
4,168.085,rs6813541,-0.182  
4,168.099,rs6553733,-0.178  
4,168.114,rs4358372,-0.172  
4,168.119,rs10033133,-0.173  
4,168.123,rs7700127,-0.160  
4,168.127,rs4695895,-0.155  
4,168.136,rs13107942,-0.178  
4,168.142,rs3889926,-0.213  
4,168.151,rs7657182,-0.210  
4,168.199,rs6812370,-0.191  
4,168.233,rs13118468,-0.184  
4,168.244,rs11133030,-0.183  
4,168.283,rs1992016,-0.189  
4,168.326,rs2196379,-0.196  
4,168.329,rs4695913,-0.196  
4,168.337,rs2164380,-0.194  
4,168.383,rs11942884,-0.207  
4,168.387,rs1467003,-0.210  
4,168.399,rs2174904,-0.204

4,168.614,rs4695918,-0.171  
4,168.849,rs4518223,-0.148  
4,168.996,rs8752,-0.091  
4,169.031,rs3775977,-0.087  
4,169.040,rs2555632,-0.085  
4,169.096,rs17295603,-0.074  
4,169.127,rs6837393,-0.068  
4,169.145,rs7657168,-0.068  
4,169.162,rs2612655,-0.072  
4,169.345,rs4425356,-0.094  
4,169.350,rs7686453,-0.094  
4,169.411,rs6553806,-0.091  
4,169.482,rs9312559,-0.083  
4,169.508,rs6827308,-0.080  
4,169.608,rs10021711,-0.070  
4,169.773,rs992363,-0.068  
4,169.853,rs4388065,-0.061  
4,170.016,rs1479377,-0.055  
4,170.021,rs13134743,-0.057  
4,170.025,rs10014039,-0.069  
4,170.027,rs13146658,-0.074  
4,170.030,rs17377586,-0.064  
4,170.031,rs10520296,-0.061  
4,170.052,rs6829020,-0.073  
4,170.060,rs11735559,-0.069  
4,170.067,rs3733398,-0.078  
4,170.073,rs17061779,-0.086  
4,170.075,rs12512924,-0.090  
4,170.082,rs722825,-0.092  
4,170.096,rs17061991,-0.077  
4,170.119,rs13140287,-0.056  
4,170.158,rs2132339,-0.057  
4,170.178,rs11133116,-0.057  
4,170.287,rs4306906,-0.046  
4,170.350,rs11133119,-0.040  
4,170.708,rs12499459,-0.025  
4,170.770,rs2333391,-0.021  
4,171.022,rs2291244,-0.004  
4,171.040,rs11731185,-0.004  
4,171.050,rs17672498,-0.006  
4,171.081,rs10013975,-0.012  
4,171.089,rs2046262,-0.013  
4,171.142,rs10520340,-0.020  
4,171.236,rs6553943,-0.025  
4,171.284,rs4690687,-0.020  
4,171.341,rs1454158,-0.007  
4,171.343,rs13144122,-0.007  
4,171.370,rs11932699,-0.017  
4,171.376,rs17631173,-0.019  
4,171.384,rs4690696,-0.018  
4,171.429,rs11133152,-0.020  
4,171.527,rs309732,-0.007  
4,171.659,rs309800,-0.005  
4,171.770,rs1017912,-0.000  
4,171.882,rs6826173,-0.003  
4,171.935,rs3775195,-0.006  
4,172.147,rs11734535,-0.008  
4,172.423,rs7662445,-0.004  
4,172.468,rs13110230,-0.001  
4,172.566,rs12512817,0.000  
4,172.612,rs1866505,0.001

4,172.619,rs6846031,0.001  
4,172.639,rs2580069,0.002  
4,172.678,rs966023,0.004  
4,172.703,rs1992264,0.009  
4,172.709,rs6821871,0.001  
4,172.718,rs2118922,0.001  
4,172.738,rs15671111,0.002  
4,172.746,rs2046824,0.002  
4,172.764,rs6850861,0.002  
4,172.780,rs17064661,0.002  
4,172.786,rs1983130,0.003  
4,172.789,rs3805169,0.003  
4,172.796,rs1055678,0.005  
4,172.805,rs9312207,0.014  
4,172.807,rs7671847,0.028  
4,172.820,rs17064802,0.042  
4,172.844,rs2279932,0.075  
4,172.848,rs4690523,0.078  
4,172.870,rs6823035,0.080  
4,172.907,rs1882160,0.082  
4,172.925,rs1920975,0.081  
4,172.978,rs13102468,0.080  
4,172.983,rs10019475,0.079  
4,173.089,rs10017412,0.078  
4,173.107,rs1377859,0.077  
4,173.246,rs1676169,0.065  
4,173.336,rs1462505,0.088  
4,173.342,rs10520402,0.089  
4,173.551,rs1458717,0.107  
4,173.901,rs2063393,0.147  
4,174.024,rs9991342,0.183  
4,174.070,rs10520407,0.188  
4,174.088,rs2702386,0.191  
4,174.120,rs1903524,0.191  
4,174.144,rs2250361,0.204  
4,174.168,rs1903530,0.189  
4,174.213,rs2702432,0.223  
4,174.305,rs2246528,0.196  
4,174.382,rs2126270,0.199  
4,174.441,rs1434035,0.196  
4,174.454,rs17066485,0.194  
4,174.457,rs17066498,0.193  
4,174.474,rs12644125,0.187  
4,174.481,rs2570725,0.187  
4,174.621,rs4862035,0.172  
4,174.729,rs418063,0.160  
4,174.768,rs346119,0.156  
4,175.122,rs1373044,0.200  
4,175.267,rs930972,0.222  
4,175.321,rs2167373,0.217  
4,175.325,rs7698185,0.216  
4,175.332,rs17066974,0.216  
4,175.529,rs2028492,0.255  
4,175.704,rs11934681,0.231  
4,175.730,rs1457402,0.227  
4,175.780,rs12641267,0.220  
4,175.994,rs6826259,0.166  
4,176.090,rs1378554,0.148  
4,176.096,rs10002760,0.156  
4,176.127,rs7688643,0.181  
4,176.164,rs1455659,0.196

4,176.188,rs17821431,0.197  
4,176.271,rs767002,0.202  
4,176.353,rs3849603,0.216  
4,176.405,rs6854193,0.211  
4,176.441,rs6836146,0.217  
4,176.522,rs12500438,0.228  
4,176.547,rs4861798,0.218  
4,176.613,rs6852457,0.186  
4,176.636,rs1380000,0.175  
4,176.880,rs6552396,0.179  
4,176.935,rs13435610,0.187  
4,177.123,rs2125431,0.213  
4,177.193,rs7674405,0.215  
4,177.270,rs6552407,0.247  
4,177.434,rs1665831,0.248  
4,177.522,rs1979068,0.246  
4,177.622,rs13121605,0.241  
4,177.662,rs6836062,0.236  
4,177.688,rs1868056,0.232  
4,177.734,rs1447323,0.268  
4,177.762,rs17069038,0.266  
4,177.838,rs6834475,0.266  
4,177.890,rs6847807,0.285  
4,177.909,rs4861849,0.283  
4,177.935,rs13141204,0.281  
4,177.969,rs11934651,0.263  
4,177.977,rs2309241,0.258  
4,178.047,rs2677008,0.206  
4,178.060,rs7678786,0.200  
4,178.063,rs4597870,0.199  
4,178.069,rs4241721,0.198  
4,178.084,rs4552520,0.166  
4,178.206,rs2546595,0.165  
4,178.218,rs13134793,0.165  
4,178.224,rs17069618,0.165  
4,178.228,rs17180827,0.165  
4,178.290,rs3095968,0.165  
4,178.302,rs6851035,0.166  
4,178.306,rs3095966,0.166  
4,178.337,rs3113757,0.154  
4,178.361,rs3113765,0.144  
4,178.379,rs2446802,0.145  
4,178.427,rs2613055,0.144  
4,178.630,rs3101265,0.161  
4,178.664,rs2250756,0.159  
4,178.716,rs17203326,0.153  
4,178.724,rs7657018,0.153  
4,178.878,rs10015408,0.133  
4,178.904,rs10866243,0.133  
4,179.044,rs6817295,0.160  
4,179.133,rs1357353,0.158  
4,179.234,rs13121678,0.183  
4,179.539,rs9312270,0.193  
4,179.650,rs10020564,0.206  
4,179.727,rs6824538,0.216  
4,179.759,rs10520466,0.202  
4,179.838,rs7688965,0.185  
4,179.971,rs6845037,0.203  
4,179.981,rs9999847,0.207  
4,180.040,rs10520469,0.222  
4,180.057,rs6836317,0.227

4,180.219,rs6844811,0.197  
4,180.227,rs7666029,0.196  
4,180.263,rs11930570,0.196  
4,180.307,rs7675654,0.195  
4,180.318,rs11729166,0.195  
4,180.345,rs2309472,0.193  
4,180.357,rs4479746,0.218  
4,180.394,rs1897994,0.213  
4,180.396,rs4861475,0.213  
4,180.465,rs12649512,0.192  
4,180.471,rs4861975,0.190  
4,180.491,rs1435497,0.181  
4,180.508,rs1439276,0.178  
4,180.519,rs12650613,0.179  
4,180.527,rs11132072,0.180  
4,180.533,rs4362864,0.180  
4,180.546,rs1439283,0.176  
4,180.634,rs7662677,0.207  
4,180.641,rs10520501,0.211  
4,180.652,rs6856771,0.216  
4,180.663,rs13144599,0.217  
4,180.748,rs6855392,0.270  
4,180.771,rs17072249,0.242  
4,180.773,rs12508055,0.240  
4,180.780,rs7659598,0.241  
4,180.810,rs6815030,0.225  
4,180.817,rs4862004,0.242  
4,180.825,rs10012329,0.258  
4,180.827,rs7687804,0.255  
4,180.833,rs7434383,0.248  
4,180.858,rs7679999,0.218  
4,180.864,rs11931121,0.211  
4,180.885,rs965523,0.186  
4,180.909,rs2138743,0.168  
4,180.927,rs6824345,0.164  
4,180.955,rs6813301,0.165  
4,180.994,rs2063956,0.179  
4,181.012,rs7676827,0.185  
4,181.014,rs17288133,0.186  
4,181.019,rs7697411,0.189  
4,181.020,rs12503812,0.189  
4,181.102,rs7693462,0.241  
4,181.200,rs10520518,0.244  
4,181.218,rs10026007,0.243  
4,181.265,rs11132111,0.211  
4,181.405,rs1114531,0.208  
4,181.420,rs335068,0.208  
4,181.572,rs896028,0.244  
4,181.654,rs6815953,0.249  
4,181.673,rs17307191,0.250  
4,181.701,rs2726802,0.249  
4,181.744,rs1031313,0.248  
4,181.763,rs2726807,0.248  
4,181.888,rs7687160,0.246  
4,182.116,rs6552549,0.276  
4,182.184,rs2675531,0.278  
4,182.222,rs7669582,0.277  
4,182.236,rs10520528,0.277  
4,182.374,rs930878,0.263  
4,182.395,rs1878221,0.261  
4,182.442,rs11935545,0.257

4,182.477,rs6823473,0.254  
4,182.651,rs11736941,0.239  
4,182.739,rs4861512,0.229  
4,182.806,rs13145928,0.226  
4,182.882,rs10520533,0.231  
4,182.980,rs11731599,0.238  
4,183.051,rs4428328,0.241  
4,183.065,rs7674760,0.241  
4,183.171,rs10520536,0.231  
4,183.468,rs6850978,0.184  
4,183.571,rs4535369,0.186  
4,183.647,rs6845497,0.188  
4,183.652,rs7694547,0.188  
4,183.742,rs17073904,0.184  
4,183.980,rs4862091,0.179  
4,183.986,rs17074036,0.177  
4,184.005,rs17074042,0.172  
4,184.019,rs4467618,0.172  
4,184.096,rs17074066,0.231  
4,184.098,rs3805200,0.234  
4,184.157,rs2309777,0.259  
4,184.215,rs4862103,0.287  
4,184.258,rs4241754,0.310  
4,184.473,rs4861534,0.307  
4,184.481,rs11132155,0.307  
4,184.499,rs11132156,0.318  
4,184.564,rs7277,0.370  
4,184.736,rs13117933,0.459  
4,185.408,rs6825466,0.412  
4,185.478,rs11736402,0.404  
4,185.561,rs4469120,0.393  
4,185.615,rs7688139,0.398  
4,185.649,rs1473070,0.401  
4,185.680,rs11929772,0.378  
4,185.728,rs4861543,0.427  
4,185.734,rs9995832,0.490  
4,185.736,rs13151481,0.511  
4,185.750,rs17074703,0.512  
4,185.756,rs1511674,0.526  
4,185.765,rs7699622,0.585  
4,185.782,rs11725216,0.649  
4,185.858,rs11723316,0.824  
4,185.894,rs4440262,0.836  
4,185.907,rs4426827,0.841  
4,185.920,rs6811805,0.812  
4,185.931,rs11723412,0.792  
4,185.946,rs4394039,0.763  
4,185.953,rs7656979,0.716  
4,185.961,rs9884125,0.679  
4,185.970,rs13128324,0.666  
4,185.972,rs12504367,0.661  
4,186.014,rs6552695,0.710  
4,186.040,rs6838230,0.694  
4,186.254,rs4583804,0.643  
4,186.338,rs10000388,0.633  
4,186.526,rs4129955,0.599  
4,186.541,rs6845392,0.599  
4,186.569,rs13142457,0.586  
4,186.642,rs10019343,0.559  
4,186.670,rs7659026,0.562  
4,186.756,rs17075058,0.573

4,186.812,rs13106255,0.580  
4,186.895,rs13150058,0.586  
4,187.133,rs2309942,0.555  
4,187.142,rs6818342,0.553  
4,187.170,rs7696821,0.550  
4,187.186,rs6552722,0.549  
4,187.245,rs12502711,0.544  
4,187.411,rs7685679,0.493  
4,187.623,rs4862292,0.482  
4,188.085,rs4241790,0.382  
4,188.110,rs1921564,0.375  
4,188.153,rs1921560,0.377  
4,188.268,rs4862330,0.376  
4,188.352,rs6819977,0.376  
4,188.414,rs938016,0.376  
4,188.551,rs877378,0.407  
4,188.676,rs2703737,0.403  
4,188.791,rs999759,0.397  
4,188.820,rs793899,0.395  
4,188.961,rs11727845,0.334  
4,189.026,rs6831978,0.336  
4,189.062,rs6856910,0.337  
4,189.101,rs11132242,0.321  
4,189.130,rs2241500,0.312  
4,189.139,rs7685555,0.340  
4,189.142,rs3775556,0.337  
4,189.162,rs7677486,0.304  
4,189.219,rs3756094,0.302  
4,189.231,rs12504466,0.281  
4,189.254,rs13116389,0.273  
4,189.268,rs793794,0.283  
4,189.297,rs3775574,0.302  
4,189.378,rs13111483,0.301  
4,189.587,rs1976955,0.376  
4,189.677,rs2178094,0.350  
4,190.285,rs7699623,0.381  
4,190.336,rs755535,0.386  
4,190.569,rs6552828,0.405  
4,190.620,rs9997745,0.403  
4,190.759,rs4862432,0.409  
4,190.797,rs4862439,0.393  
4,190.840,rs7670324,0.386  
4,190.880,rs13434707,0.389  
4,190.891,rs11723505,0.390  
4,190.917,rs6835984,0.397  
4,190.991,rs6552840,0.401  
4,191.184,rs6822322,0.436  
4,191.224,rs4355430,0.433  
4,191.260,rs9993348,0.443  
4,191.314,rs4862478,0.453  
4,191.387,rs11132270,0.455  
4,191.405,rs16813,0.442  
4,191.461,rs6854448,0.406  
4,191.597,rs4415003,0.339  
4,191.783,rs2310156,0.282  
4,191.799,rs12512707,0.349  
4,191.820,rs6552864,0.350  
4,191.847,rs7661225,0.353  
4,191.879,rs6818704,0.350  
4,191.977,rs2046535,0.329  
4,192.303,rs3112911,0.311

4,192.463,rs7672656,0.297  
4,192.730,rs1031128,0.234  
4,192.810,rs12649063,0.180  
4,192.838,rs13102445,0.175  
4,192.865,rs6823490,0.173  
4,192.875,rs6854874,0.168  
4,192.905,rs9312336,0.150  
4,192.911,rs12502295,0.150  
4,192.927,rs13119106,0.158  
4,192.947,rs3816807,0.151  
4,192.966,rs7663196,0.144  
4,192.967,rs6821894,0.143  
4,192.983,rs4241809,0.135  
4,192.996,rs9312338,0.113  
4,193.001,rs4599460,0.105  
4,193.015,rs4862562,0.126  
4,193.024,rs11132333,0.139  
4,193.046,rs1547909,0.150  
4,193.110,rs7667992,0.223  
4,193.177,rs4487396,0.183  
4,193.187,rs2310357,0.180  
4,193.243,rs6858040,0.164  
4,193.273,rs9998709,0.156  
4,193.309,rs11132350,0.151  
4,193.364,rs7673778,0.164  
4,193.406,rs6814512,0.165  
4,193.421,rs13111004,0.165  
4,193.500,rs6552928,0.158  
4,193.621,rs10002028,0.152  
4,193.646,rs13132627,0.152  
4,193.814,rs7680928,0.126  
4,193.991,rs959621,0.100  
4,194.003,rs1454746,0.121  
4,194.043,rs830829,0.070  
4,194.084,rs4862611,0.054  
4,194.129,rs830838,0.037  
4,194.201,rs2008461,0.035  
4,194.261,rs1401573,0.032  
4,194.268,rs6815342,0.032  
4,194.389,rs7691384,0.025  
4,194.436,rs956239,0.023  
4,194.553,rs4608848,0.017  
4,194.701,rs1706145,0.016  
4,194.769,rs7660462,0.019  
4,194.941,rs2036912,0.026  
4,195.161,rs1912826,0.041  
4,195.380,rs4253418,0.026  
4,195.447,rs13145616,0.022  
4,195.499,rs1008728,0.018  
4,195.530,rs12331264,0.017  
4,195.550,rs6552971,0.011  
4,195.556,rs7687352,0.010  
4,195.759,rs1901314,0.004  
4,196.110,rs9999651,0.001  
4,196.207,rs10003777,0.005  
4,196.269,rs6830267,0.002  
4,196.305,rs11723176,0.001  
4,196.418,rs7699670,-0.000  
4,196.543,rs13140444,-0.004  
4,196.661,rs11930659,-0.012  
4,196.802,rs2637777,-0.013



4,196.865,rs3733406,-0.011  
4,197.068,rs167853,-0.007  
4,197.069,rs2130910,-0.007  
4,197.079,rs2130909,-0.006  
4,197.258,rs3733413,-0.001  
4,197.474,rs925642,0.000  
4,197.552,rs6833702,0.001  
4,197.647,rs12640954,0.006  
4,198.078,rs4862742,0.007  
4,198.095,rs578135,0.007  
4,198.227,rs7682123,0.008  
4,198.240,rs999319,0.008  
4,198.266,rs754548,0.008  
4,198.730,rs6835306,0.019  
4,198.742,rs6814129,0.019  
4,198.787,rs7441526,0.018  
4,198.794,rs4862758,0.018  
4,198.918,rs6818214,0.011  
4,198.969,rs2129654,0.011  
4,199.145,rs4611977,0.011  
4,199.471,rs1565106,0.011  
4,199.693,rs10461324,0.011  
4,199.810,rs4308418,0.010  
4,199.834,rs6553055,0.010  
4,200.044,rs1156741,0.007  
4,200.732,rs12641785,0.005  
4,201.165,rs4861749,0.001  
4,201.534,rs4862815,-0.000  
4,201.538,rs1532857,-0.000  
4,201.583,rs7677258,-0.000  
4,202.562,rs9992060,-0.000  
4,202.565,rs7683009,0.000  
4,202.566,rs10006997,0.000  
4,202.590,rs4315850,-0.002  
4,202.598,rs10018412,-0.005  
4,202.604,rs12644789,-0.007  
4,202.608,rs7439650,-0.005  
4,202.612,rs4862848,-0.007  
4,202.614,rs6840208,-0.009  
4,202.615,rs2172340,-0.011  
4,202.616,rs2131287,-0.008  
4,202.619,rs2889360,-0.007  
4,202.624,rs1540663,-0.008  
4,202.634,rs9684216,-0.010  
4,202.640,rs13131525,-0.008  
4,202.648,rs12501503,-0.003  
4,202.652,rs4492063,-0.002  
4,202.656,rs6813871,-0.003  
4,202.658,rs3924963,-0.004  
4,202.663,rs4476671,-0.009  
4,202.667,rs7375584,-0.008  
4,202.674,rs6830572,-0.012  
4,202.678,rs12639689,-0.016  
4,202.682,rs4863305,-0.021  
4,202.747,rs2292434,-0.026  
4,202.761,rs425974,-0.026  
4,202.882,rs931885,-0.026  
4,202.960,rs10023035,-0.016  
4,202.999,rs7667826,-0.012  
4,203.042,rs4863054,-0.011  
4,203.072,rs4863354,-0.009

4,203.078,rs2377343,-0.010  
4,203.080,rs12501064,-0.010  
4,203.114,rs6817256,-0.017  
4,203.207,rs899273,-0.023  
4,203.376,rs7685306,-0.022  
4,203.547,rs1073671,-0.020  
4,203.689,rs2218692,-0.026  
4,203.803,rs7677253,-0.026  
4,203.871,rs11937288,-0.027  
4,203.975,rs11132593,-0.033  
4,204.029,rs10018868,-0.037  
4,204.080,rs13126066,-0.043  
4,204.110,rs2029952,-0.047  
4,204.206,rs7700119,-0.059  
4,204.226,rs7690324,-0.068  
4,204.249,rs11737011,-0.065  
4,204.261,rs13106777,-0.061  
4,204.267,rs6848521,-0.059  
4,204.301,rs11932479,-0.068  
4,204.377,rs10006955,-0.075  
4,204.416,rs10032784,-0.070  
4,204.466,rs6553315,-0.065  
4,204.482,rs872030,-0.063  
4,204.631,rs1551137,-0.049  
4,205.020,rs7684487,-0.034  
4,205.050,rs1996801,-0.033  
4,205.070,rs11132766,-0.030  
4,205.162,rs13119686,-0.032  
4,205.247,rs17080259,-0.031  
5,0.023,rs341260,-0.080  
5,0.053,rs341267,-0.080  
5,0.126,rs6874933,-0.081  
5,0.357,rs2671898,-0.087  
5,0.371,rs2672777,-0.089  
5,0.458,rs6864158,-0.120  
5,0.536,rs4541696,-0.104  
5,0.610,rs12518227,-0.097  
5,0.630,rs3828569,-0.097  
5,0.819,rs7702532,-0.100  
5,0.961,rs4975533,-0.126  
5,0.966,rs326046,-0.127  
5,0.984,rs4078802,-0.129  
5,1.016,rs4975526,-0.135  
5,1.028,rs3810854,-0.136  
5,1.092,rs4580814,-0.138  
5,1.111,rs4594899,-0.132  
5,1.138,rs7726442,-0.118  
5,1.171,rs4975596,-0.113  
5,1.209,rs7727745,-0.107  
5,1.331,rs4073918,-0.089  
5,1.381,rs2736122,-0.084  
5,1.490,rs2736100,-0.068  
5,1.780,rs27061,-0.064  
5,1.811,rs2963265,-0.087  
5,1.885,rs12516758,-0.099  
5,1.903,rs40184,-0.101  
5,1.969,rs27048,-0.098  
5,2.046,rs460000,-0.095  
5,2.067,rs403636,-0.092  
5,2.086,rs6350,-0.089  
5,2.202,rs27056,-0.066

5,2.266,rs1010626,-0.060  
5,2.298,rs36987,-0.060  
5,2.367,rs2963279,-0.080  
5,2.374,rs4406174,-0.084  
5,2.439,rs4551123,-0.101  
5,2.501,rs2962066,-0.133  
5,2.550,rs4975556,-0.153  
5,2.951,rs931709,-0.124  
5,3.006,rs10512656,-0.124  
5,3.263,rs2242411,-0.110  
5,3.304,rs1107059,-0.091  
5,3.337,rs2172532,-0.096  
5,3.432,rs2276986,-0.102  
5,3.519,rs6864000,-0.107  
5,3.622,rs12188301,-0.120  
5,3.669,rs4975744,-0.124  
5,3.748,rs2232376,-0.130  
5,3.805,rs12653946,-0.140  
5,3.855,rs6894487,-0.145  
5,4.008,rs972973,-0.161  
5,4.022,rs10055976,-0.162  
5,4.243,rs4975721,-0.160  
5,4.324,rs4975807,-0.158  
5,4.415,rs6555046,-0.151  
5,4.486,rs10475134,-0.150  
5,4.519,rs4566837,-0.157  
5,4.534,rs10063808,-0.160  
5,4.594,rs4975819,-0.173  
5,4.632,rs11950809,-0.169  
5,4.648,rs7446517,-0.170  
5,4.671,rs4075798,-0.146  
5,4.707,rs6860349,-0.123  
5,4.719,rs6555064,-0.119  
5,4.724,rs7719723,-0.117  
5,4.771,rs7735656,-0.120  
5,4.826,rs10076206,-0.123  
5,4.864,rs4866475,-0.133  
5,4.948,rs16903629,-0.150  
5,4.968,rs12187097,-0.157  
5,5.016,rs10041522,-0.168  
5,5.051,rs10512689,-0.166  
5,5.159,rs10068115,-0.156  
5,5.166,rs1458513,-0.156  
5,5.307,rs2652147,-0.172  
5,5.361,rs7718226,-0.174  
5,5.371,rs316566,-0.176  
5,5.406,rs7445525,-0.182  
5,5.540,rs10036054,-0.207  
5,5.591,rs6869394,-0.182  
5,5.622,rs7715102,-0.183  
5,5.692,rs160730,-0.174  
5,5.788,rs315914,-0.144  
5,6.156,rs10462760,-0.068  
5,6.227,rs6875477,-0.061  
5,6.349,rs445296,-0.067  
5,6.478,rs569244,-0.047  
5,6.528,rs2004187,-0.039  
5,6.584,rs406353,-0.034  
5,6.615,rs6555117,-0.033  
5,6.737,rs950864,-0.040  
5,6.772,rs7721778,-0.042

5,6.846,rs4866662,-0.045  
5,6.883,rs10474751,-0.051  
5,6.922,rs2962580,-0.057  
5,7.002,rs924213,-0.028  
5,7.038,rs11432,-0.026  
5,7.115,rs6883371,-0.022  
5,7.201,rs1908976,-0.018  
5,7.308,rs1540708,-0.020  
5,7.327,rs10038374,-0.019  
5,7.405,rs7442964,-0.018  
5,7.436,rs559379,-0.023  
5,7.503,rs1024029,-0.034  
5,7.657,rs2934555,-0.030  
5,7.703,rs10061701,-0.030  
5,7.708,rs16874371,-0.030  
5,7.800,rs2934528,-0.028  
5,7.899,rs12657444,-0.031  
5,7.938,rs6861422,-0.024  
5,7.997,rs7712222,-0.034  
5,8.016,rs2009378,-0.028  
5,8.043,rs2922992,-0.020  
5,8.095,rs2404567,-0.020  
5,8.173,rs10068728,-0.031  
5,8.226,rs167528,-0.033  
5,8.299,rs464918,-0.044  
5,8.372,rs314008,-0.029  
5,8.390,rs317000,-0.031  
5,8.496,rs903397,-0.036  
5,8.592,rs457099,-0.030  
5,8.606,rs251817,-0.030  
5,8.720,rs875853,-0.023  
5,8.729,rs1310088,-0.023  
5,8.740,rs1215667,-0.023  
5,8.743,rs396319,-0.023  
5,8.818,rs1691018,-0.028  
5,8.866,rs1441533,-0.028  
5,8.916,rs4476727,-0.024  
5,8.982,rs6896919,-0.021  
5,8.988,rs12188329,-0.022  
5,9.070,rs4521479,-0.027  
5,9.123,rs251433,-0.042  
5,9.134,rs32689,-0.042  
5,9.202,rs6555203,-0.056  
5,9.456,rs698144,-0.052  
5,9.560,rs4866585,-0.028  
5,9.573,rs828316,-0.027  
5,9.576,rs10042985,-0.027  
5,9.656,rs6555208,-0.020  
5,9.777,rs1502644,-0.011  
5,9.808,rs6892937,-0.009  
5,9.881,rs2134400,-0.013  
5,9.903,rs1566691,-0.012  
5,9.906,rs13174381,-0.012  
5,9.979,rs905350,-0.013  
5,9.990,rs2134404,-0.013  
5,10.548,rs540937,-0.013  
5,10.761,rs6860112,-0.018  
5,10.799,rs10076711,-0.017  
5,10.850,rs11953297,-0.016  
5,10.917,rs959937,-0.022  
5,10.922,rs7706780,-0.022

5,10.952,rs265180,-0.023  
5,10.974,rs11739066,-0.028  
5,11.159,rs13185799,-0.024  
5,11.172,rs261125,-0.023  
5,11.184,rs261130,-0.030  
5,11.208,rs1080648,-0.046  
5,11.238,rs4702677,-0.076  
5,11.271,rs10076204,-0.075  
5,11.294,rs6861699,-0.065  
5,11.355,rs9313082,-0.082  
5,11.437,rs1450822,-0.062  
5,11.538,rs16873639,-0.068  
5,11.575,rs293067,-0.048  
5,11.586,rs6894400,-0.040  
5,11.627,rs6887582,-0.017  
5,11.633,rs293102,-0.012  
5,11.644,rs7713961,-0.011  
5,11.655,rs2077369,-0.011  
5,11.660,rs418752,-0.011  
5,11.677,rs1346575,-0.012  
5,11.691,rs2895497,-0.013  
5,11.710,rs4568336,-0.014  
5,11.781,rs2047728,-0.013  
5,11.821,rs10058793,-0.013  
5,11.885,rs4235550,-0.013  
5,11.996,rs10512749,-0.020  
5,12.079,rs10051514,-0.028  
5,12.144,rs10475277,-0.026  
5,12.152,rs501031,-0.026  
5,12.170,rs6868240,-0.026  
5,12.227,rs16874489,-0.024  
5,12.321,rs465871,-0.014  
5,12.345,rs446464,-0.015  
5,12.421,rs272162,-0.018  
5,12.653,rs861512,-0.018  
5,12.682,rs814776,-0.017  
5,12.830,rs270178,-0.016  
5,12.839,rs997427,-0.015  
5,12.883,rs4702234,-0.014  
5,12.970,rs17762877,-0.010  
5,13.056,rs4702248,-0.004  
5,13.112,rs2913633,-0.002  
5,13.147,rs1834928,-0.000  
5,13.182,rs2964411,-0.000  
5,13.211,rs2964399,-0.000  
5,13.326,rs4076657,0.000  
5,13.404,rs4702257,0.001  
5,13.436,rs2964478,0.000  
5,13.469,rs7725935,0.000  
5,13.543,rs2964149,0.000  
5,13.747,rs2964137,0.000  
5,13.770,rs2964132,0.000  
5,13.840,rs2399696,0.000  
5,14.011,rs3806874,-0.000  
5,14.179,rs2619855,-0.000  
5,14.399,rs252838,-0.005  
5,14.479,rs246760,-0.007  
5,14.499,rs153264,-0.009  
5,14.548,rs2913315,-0.012  
5,14.644,rs7703207,-0.011  
5,14.645,rs153269,-0.011

5,14.846,rs256360,-0.010  
5,15.128,rs406792,-0.006  
5,15.316,rs42286,-0.002  
5,15.396,rs2617562,0.006  
5,15.424,rs1864117,0.010  
5,15.446,rs16876357,0.011  
5,15.558,rs2617549,0.016  
5,15.570,rs16876434,0.016  
5,15.578,rs17746450,0.017  
5,15.714,rs10454950,0.026  
5,15.778,rs657865,0.027  
5,15.821,rs11948091,0.025  
5,15.904,rs306254,0.020  
5,16.268,rs307176,0.019  
5,16.435,rs6861277,0.020  
5,16.695,rs2937791,0.019  
5,16.774,rs2964755,0.020  
5,16.816,rs1870082,0.024  
5,16.834,rs1457120,0.016  
5,16.852,rs2914757,0.015  
5,16.869,rs4702326,0.013  
5,16.903,rs1457122,0.009  
5,16.947,rs2914749,0.003  
5,16.948,rs2925703,0.003  
5,17.055,rs7714333,0.001  
5,17.078,rs12520404,0.001  
5,17.085,rs1428986,0.001  
5,17.093,rs6872084,0.001  
5,17.321,rs12654055,0.004  
5,17.424,rs4701734,0.009  
5,17.486,rs272456,0.009  
5,17.568,rs10057455,0.009  
5,17.572,rs538938,0.009  
5,17.649,rs474953,0.007  
5,17.657,rs567431,0.007  
5,17.711,rs7735244,0.004  
5,17.793,rs12522757,0.001  
5,17.919,rs1651071,0.000  
5,17.933,rs10512874,0.000  
5,17.990,rs4701750,0.001  
5,18.242,rs10044678,0.003  
5,18.244,rs1566039,0.007  
5,18.261,rs275486,0.007  
5,18.268,rs275480,0.007  
5,18.330,rs275510,0.008  
5,18.343,rs12513764,0.007  
5,18.450,rs12656353,0.005  
5,18.512,rs2397718,0.001  
5,18.537,rs1845852,0.001  
5,18.701,rs11134199,-0.000  
5,18.753,rs7711636,-0.000  
5,18.920,rs903848,-0.003  
5,18.944,rs16878407,-0.003  
5,18.978,rs7709479,-0.004  
5,19.026,rs7727403,-0.005  
5,19.059,rs10051593,-0.006  
5,19.179,rs4235576,-0.007  
5,19.210,rs9986256,-0.008  
5,19.358,rs4132671,-0.010  
5,19.421,rs1505080,-0.012  
5,19.593,rs6872422,-0.011

5,19.636,rs7733194,-0.013  
5,19.649,rs13175786,-0.015  
5,19.720,rs252546,-0.023  
5,19.776,rs10038196,-0.033  
5,19.798,rs1392481,-0.038  
5,19.837,rs6875695,-0.047  
5,20.021,rs12716194,-0.069  
5,20.244,rs989634,-0.100  
5,20.257,rs10059539,-0.101  
5,20.313,rs326205,-0.106  
5,20.318,rs4702506,-0.105  
5,20.369,rs7730643,-0.093  
5,20.370,rs326121,-0.093  
5,20.378,rs6555501,-0.112  
5,20.452,rs162271,-0.110  
5,20.535,rs1471621,-0.108  
5,20.563,rs331413,-0.093  
5,20.584,rs9313211,-0.082  
5,20.629,rs11134268,-0.077  
5,20.810,rs6886541,-0.101  
5,20.822,rs11744506,-0.121  
5,20.949,rs1506105,-0.126  
5,21.015,rs336164,-0.110  
5,21.107,rs1823809,-0.092  
5,21.201,rs6875114,-0.080  
5,21.277,rs12514960,-0.071  
5,21.420,rs12109465,-0.074  
5,21.458,rs2136170,-0.074  
5,21.702,rs6555545,-0.102  
5,21.729,rs6860832,-0.100  
5,21.763,rs11954087,-0.092  
5,21.830,rs173134,-0.073  
5,21.938,rs1505016,-0.063  
5,21.959,rs9313243,-0.074  
5,21.971,rs786840,-0.042  
5,22.304,rs2657031,-0.022  
5,22.425,rs10057636,-0.013  
5,22.616,rs3777281,-0.004  
5,22.722,rs1806112,-0.001  
5,22.740,rs40680,-0.001  
5,22.768,rs1805964,0.000  
5,22.811,rs10042101,0.000  
5,22.855,rs40666,0.001  
5,23.029,rs1805918,0.002  
5,23.215,rs1205725,0.000  
5,23.307,rs805153,-0.000  
5,23.321,rs42196,-0.000  
5,23.349,rs788469,-0.001  
5,23.404,rs666617,-0.002  
5,23.449,rs3798012,-0.001  
5,23.449,rs1858428,-0.001  
5,23.456,rs268532,-0.001  
5,23.477,rs3822799,-0.003  
5,23.483,rs436243,-0.002  
5,23.490,rs268542,-0.001  
5,23.534,rs433755,-0.001  
5,23.673,rs268551,-0.005  
5,23.686,rs6881628,-0.005  
5,23.704,rs1651283,-0.006  
5,23.713,rs17329702,-0.007  
5,23.734,rs150633,-0.008

5,23.769,rs218041,-0.007  
5,23.967,rs27843,-0.006  
5,24.161,rs4702641,-0.003  
5,24.162,rs194060,-0.003  
5,24.247,rs16883466,-0.003  
5,24.361,rs3094352,-0.000  
5,24.608,rs16883572,0.000  
5,24.641,rs2387174,0.000  
5,24.672,rs16883639,0.000  
5,24.717,rs4701850,0.000  
5,24.806,rs11739224,0.000  
5,24.816,rs2963899,0.000  
5,24.845,rs2963894,0.001  
5,24.925,rs6555620,0.001  
5,25.026,rs4272105,0.006  
5,25.042,rs11739710,0.007  
5,25.043,rs10044248,0.007  
5,25.110,rs2914722,0.008  
5,25.117,rs2914723,0.009  
5,25.214,rs1428954,0.011  
5,25.329,rs433676,0.013  
5,25.506,rs314734,0.010  
5,25.524,rs1476481,0.005  
5,25.547,rs314743,0.001  
5,25.654,rs7719627,0.005  
5,25.676,rs1876154,0.005  
5,26.043,rs1911942,0.001  
5,26.105,rs16884244,0.001  
5,26.225,rs1508850,0.000  
5,26.333,rs11133604,0.000  
5,26.343,rs2292263,0.001  
5,26.408,rs3846599,0.003  
5,26.978,rs3932191,0.001  
5,26.997,rs2589661,0.001  
5,27.001,rs6892802,0.001  
5,27.001,rs7732984,0.001  
5,27.005,rs2589658,0.001  
5,27.009,rs17816571,0.002  
5,27.026,rs2673892,0.001  
5,27.036,rs2589656,0.001  
5,27.045,rs2936590,0.001  
5,27.228,rs4702704,0.005  
5,27.324,rs10035299,0.004  
5,27.433,rs900531,0.001  
5,28.062,rs12186813,0.003  
5,28.083,rs2083232,0.001  
5,28.169,rs6895554,0.000  
5,28.235,rs6860099,0.000  
5,28.253,rs17197013,0.000  
5,28.279,rs1995364,0.000  
5,28.298,rs16901129,0.000  
5,28.335,rs1354134,0.000  
5,28.353,rs16901148,0.000  
5,28.357,rs852562,0.000  
5,28.397,rs2937509,-0.000  
5,28.490,rs4702781,-0.005  
5,28.530,rs1638362,-0.007  
5,28.625,rs1990004,-0.013  
5,28.664,rs16901339,-0.014  
5,28.671,rs13188937,-0.015  
5,28.673,rs6883143,-0.015



5,28.673,rs16901347,-0.015  
5,28.681,rs1018965,-0.015  
5,28.806,rs27520,-0.027  
5,29.019,rs13160436,-0.014  
5,29.053,rs6860372,-0.013  
5,29.055,rs26001,-0.013  
5,29.108,rs2012187,-0.011  
5,29.179,rs4702799,-0.009  
5,29.228,rs1423493,-0.008  
5,29.264,rs7702488,-0.012  
5,29.294,rs40485,-0.015  
5,29.312,rs31837,-0.015  
5,29.377,rs31888,-0.016  
5,29.625,rs32434,-0.014  
5,29.662,rs6893111,-0.014  
5,29.778,rs2530913,-0.005  
5,29.813,rs10513101,-0.003  
5,29.963,rs7732155,-0.000  
5,30.029,rs7733427,0.001  
5,30.044,rs6554653,0.001  
5,30.092,rs1379903,0.001  
5,30.467,rs7449177,0.000  
5,30.707,rs17240093,-0.000  
5,30.827,rs1373950,-0.000  
5,30.833,rs11744397,-0.000  
5,30.929,rs233348,-0.000  
5,31.156,rs6871272,0.002  
5,31.206,rs10062092,0.002  
5,31.323,rs2896104,0.004  
5,31.326,rs6554809,0.004  
5,31.424,rs4701984,0.015  
5,31.466,rs795542,0.014  
5,31.498,rs17265607,0.013  
5,31.550,rs1596791,0.013  
5,31.557,rs6868995,0.013  
5,31.578,rs895314,0.013  
5,31.701,rs1445823,0.014  
5,31.887,rs339428,0.015  
5,31.920,rs7727798,0.013  
5,32.033,rs7720329,0.010  
5,32.115,rs7708445,0.010  
5,32.305,rs17298767,0.006  
5,32.458,rs149123,0.003  
5,32.950,rs27761,0.010  
5,32.956,rs17428704,0.010  
5,33.150,rs32811,0.014  
5,33.193,rs26217,0.015  
5,33.212,rs40297,0.016  
5,33.218,rs3993996,0.016  
5,33.259,rs17307347,0.011  
5,33.277,rs39968,0.012  
5,33.309,rs152619,0.013  
5,33.503,rs17297276,0.017  
5,33.519,rs16903631,0.017  
5,33.598,rs27911,0.021  
5,33.713,rs152363,0.027  
5,33.720,rs4702049,0.038  
5,33.741,rs3087948,0.050  
5,33.958,rs2921600,0.064  
5,34.024,rs835141,0.064  
5,34.082,rs844335,0.064

5,34.092,rs9666987,0.064  
5,34.148,rs706297,0.080  
5,34.160,rs10037304,0.085  
5,34.202,rs10513195,0.094  
5,34.290,rs32447,0.113  
5,34.437,rs7707492,0.135  
5,34.576,rs304562,0.141  
5,34.688,rs983889,0.145  
5,34.875,rs6892388,0.142  
5,34.900,rs3810847,0.139  
5,35.025,rs1393266,0.148  
5,35.047,rs32199,0.143  
5,35.072,rs7701823,0.141  
5,35.228,rs344701,0.131  
5,35.463,rs4702133,0.120  
5,35.696,rs6885471,0.090  
5,35.849,rs10520840,0.059  
5,35.911,rs4702146,0.049  
5,35.992,rs334493,0.040  
5,36.053,rs1240649,0.035  
5,36.095,rs154244,0.034  
5,36.104,rs431154,0.032  
5,36.105,rs2637146,0.032  
5,36.145,rs2592037,0.015  
5,36.166,rs14153,0.013  
5,36.257,rs13537,0.003  
5,36.409,rs25912,0.001  
5,36.443,rs31299,0.000  
5,36.533,rs10051970,-0.003  
5,36.577,rs10051930,-0.005  
5,36.662,rs250340,-0.011  
5,36.674,rs31509,-0.012  
5,36.786,rs25904,-0.019  
5,36.902,rs1872004,-0.028  
5,36.932,rs11745637,-0.024  
5,37.007,rs253324,-0.005  
5,37.108,rs9312938,-0.004  
5,37.168,rs17614174,-0.002  
5,37.179,rs17707882,-0.003  
5,37.233,rs2625210,-0.011  
5,37.236,rs2562338,-0.012  
5,37.245,rs7711618,-0.013  
5,37.340,rs2562350,-0.019  
5,37.418,rs17614462,-0.029  
5,37.470,rs2625177,-0.029  
5,37.650,rs249131,-0.011  
5,37.689,rs17708295,-0.009  
5,37.866,rs4360041,-0.001  
5,38.018,rs6862915,0.003  
5,38.027,rs12519960,0.001  
5,38.028,rs17652001,0.001  
5,38.037,rs297178,0.000  
5,38.042,rs2896245,0.000  
5,38.057,rs2402350,0.001  
5,38.060,rs4602628,0.001  
5,38.066,rs1542598,0.002  
5,38.083,rs10053617,0.002  
5,38.085,rs11133892,0.002  
5,38.095,rs177110,0.003  
5,38.108,rs10475103,0.001  
5,38.124,rs298529,0.003

5,38.136,rs2173759,0.008  
5,38.147,rs2459791,0.008  
5,38.151,rs10057009,0.009  
5,38.324,rs6865140,0.009  
5,38.367,rs6864067,0.010  
5,38.377,rs11958964,0.011  
5,38.386,rs10064153,0.011  
5,38.388,rs9292873,0.011  
5,38.391,rs13166250,0.011  
5,38.407,rs1355701,0.010  
5,38.570,rs13186768,0.000  
5,38.608,rs2561642,-0.000  
5,38.666,rs442958,-0.000  
5,38.780,rs1500206,0.001  
5,38.809,rs10056318,0.000  
5,38.859,rs1405705,-0.000  
5,39.077,rs2102146,-0.001  
5,39.081,rs16886683,-0.001  
5,39.128,rs1021771,-0.001  
5,39.134,rs13172937,-0.002  
5,39.149,rs10062771,-0.001  
5,39.193,rs6893620,-0.000  
5,39.201,rs2201628,0.000  
5,39.239,rs3935803,0.001  
5,39.397,rs7709474,0.001  
5,39.484,rs6888100,0.002  
5,39.536,rs16886133,0.004  
5,39.611,rs10520861,0.008  
5,39.635,rs770297,0.011  
5,39.643,rs3792727,0.009  
5,39.665,rs347720,0.002  
5,39.781,rs1521023,0.001  
5,40.109,rs13170493,0.000  
5,40.161,rs7706987,0.000  
5,40.315,rs10941711,-0.000  
5,40.416,rs12520315,-0.001  
5,40.455,rs2434781,-0.000  
5,40.489,rs2434772,0.000  
5,40.541,rs6890147,0.002  
5,40.981,rs10039330,0.002  
5,41.002,rs10043532,0.003  
5,41.099,rs6896002,0.007  
5,41.132,rs7707385,0.007  
5,41.345,rs6452031,0.006  
5,41.519,rs7710738,0.006  
5,41.639,rs6865522,0.007  
5,41.661,rs6871980,0.007  
5,41.736,rs7710321,0.007  
5,41.801,rs1261397,0.006  
5,41.803,rs1261394,0.006  
5,41.874,rs10039824,0.004  
5,42.043,rs16897695,0.005  
5,42.048,rs10053320,0.005  
5,42.155,rs11953049,0.001  
5,42.178,rs1561836,0.000  
5,42.196,rs13184821,0.000  
5,42.196,rs16899832,0.000  
5,42.208,rs1661975,0.000  
5,42.218,rs11957688,0.000  
5,42.264,rs1372667,-0.000  
5,42.506,rs1435247,-0.000

5,42.585,rs4701351,-0.004  
5,42.601,rs975072,-0.009  
5,42.605,rs919331,-0.011  
5,42.719,rs9686666,-0.017  
5,42.721,rs10037553,-0.017  
5,42.844,rs10075972,-0.015  
5,42.917,rs16892558,-0.017  
5,42.965,rs1521009,-0.018  
5,42.967,rs7719907,-0.018  
5,43.568,rs11954471,-0.055  
5,43.751,rs1435820,-0.071  
5,43.832,rs12519664,-0.071  
5,43.939,rs1978608,-0.065  
5,43.965,rs1346509,-0.065  
5,44.007,rs3815909,-0.075  
5,44.030,rs4290982,-0.079  
5,44.058,rs10473690,-0.079  
5,44.175,rs1505890,-0.081  
5,44.222,rs12152859,-0.105  
5,44.392,rs1960462,-0.075  
5,44.405,rs4421074,-0.068  
5,44.421,rs10071824,-0.047  
5,44.426,rs13173735,-0.044  
5,44.437,rs10055390,-0.038  
5,44.487,rs10042912,-0.015  
5,44.823,rs11955750,-0.006  
5,45.064,rs10073102,-0.006  
5,45.141,rs10036252,-0.006  
5,45.155,rs10520922,-0.006  
5,45.163,rs2126967,-0.006  
5,45.271,rs13161787,-0.003  
5,45.422,rs173585,-0.000  
5,45.431,rs10056274,0.000  
5,45.460,rs1842249,0.002  
5,45.480,rs9293221,0.005  
5,45.488,rs11745199,0.005  
5,45.524,rs4081229,0.010  
5,45.568,rs6883139,0.018  
5,45.585,rs2094805,0.018  
5,45.619,rs6870351,0.014  
5,45.670,rs10052385,0.016  
5,45.691,rs12515630,0.016  
5,45.783,rs12189045,0.014  
5,45.816,rs12516042,0.014  
5,46.035,rs1353954,0.016  
5,46.054,rs1353956,0.017  
5,46.369,rs818734,0.010  
5,46.398,rs4701549,0.012  
5,46.454,rs10072177,0.017  
5,46.483,rs6871019,0.019  
5,46.538,rs10461828,0.019  
5,46.621,rs10071841,0.018  
5,46.787,rs10473829,0.019  
5,46.925,rs6894886,0.020  
5,47.001,rs6870385,0.029  
5,47.017,rs10520936,0.028  
5,47.107,rs4867155,0.026  
5,47.119,rs7702896,0.027  
5,47.172,rs6862995,0.030  
5,47.181,rs7717247,0.031  
5,47.196,rs4371767,0.032

5,47.241,rs13153654,0.030  
5,47.254,rs13159803,0.027  
5,47.268,rs919329,0.023  
5,47.344,rs1494605,0.008  
5,47.376,rs11745152,0.006  
5,47.480,rs10056131,0.007  
5,47.484,rs1154991,0.006  
5,47.490,rs10061823,0.006  
5,47.638,rs4867568,0.009  
5,47.702,rs6450656,0.021  
5,47.736,rs6865759,0.017  
5,47.740,rs4406145,0.016  
5,47.791,rs1363873,0.016  
5,47.964,rs631844,0.015  
5,47.987,rs679895,0.014  
5,48.100,rs6450681,0.010  
5,48.159,rs2162801,0.007  
5,48.181,rs4867175,0.006  
5,48.229,rs9790969,0.006  
5,48.231,rs905858,0.006  
5,48.239,rs1827710,0.006  
5,48.261,rs588359,0.006  
5,48.337,rs17573102,0.011  
5,48.370,rs3100935,0.012  
5,48.372,rs13169659,0.012  
5,48.372,rs2330148,0.012  
5,48.372,rs7728669,0.012  
5,48.464,rs7709002,0.016  
5,48.526,rs2914129,0.015  
5,48.558,rs10461885,0.014  
5,48.715,rs4147400,0.011  
5,48.763,rs9647537,0.009  
5,48.779,rs10044555,0.008  
5,48.941,rs4403185,0.008  
5,48.984,rs4295402,0.008  
5,49.252,rs12654311,0.004  
5,49.286,rs12515629,0.004  
5,49.297,rs7726359,0.003  
5,49.528,rs4867041,0.001  
5,49.962,rs7723097,0.001  
5,49.970,rs10050805,0.001  
5,50.050,rs12173144,0.001  
5,50.071,rs4502841,0.000  
5,50.135,rs6871087,0.000  
5,50.162,rs1732919,0.000  
5,50.195,rs10520971,0.000  
5,50.195,rs11739505,0.000  
5,50.285,rs10037832,-0.001  
5,50.368,rs13172112,-0.004  
5,50.410,rs16900599,-0.004  
5,50.433,rs10520964,-0.003  
5,50.459,rs9292420,-0.002  
5,50.465,rs7734751,-0.003  
5,50.478,rs7724768,-0.003  
5,50.479,rs7724797,-0.003  
5,50.500,rs4867306,-0.001  
5,50.564,rs4867311,-0.001  
5,50.626,rs10075707,-0.000  
5,50.648,rs3806851,-0.000  
5,50.678,rs4535467,-0.000  
5,50.724,rs4457092,0.000

5,50.841,rs2287582,0.001  
5,50.929,rs7733250,0.006  
5,50.953,rs334579,0.007  
5,50.988,rs550353,0.006  
5,51.127,rs524138,0.004  
5,51.233,rs6878195,0.004  
5,51.280,rs10520987,0.004  
5,51.367,rs250834,0.003  
5,51.416,rs13187570,0.002  
5,51.437,rs1560143,0.003  
5,51.456,rs7727036,0.009  
5,51.464,rs6885718,0.004  
5,51.465,rs6890960,0.004  
5,51.486,rs168825,0.005  
5,51.500,rs6450853,0.007  
5,51.519,rs1678916,0.035  
5,51.558,rs6450855,0.038  
5,51.610,rs16901514,0.040  
5,51.904,rs13157213,0.052  
5,51.962,rs16901583,0.050  
5,52.001,rs7718233,0.048  
5,52.039,rs4867084,0.046  
5,52.389,rs6450868,0.024  
5,52.432,rs16901644,0.023  
5,52.444,rs13347335,0.020  
5,52.450,rs2330778,0.024  
5,52.465,rs905836,0.035  
5,52.633,rs1107904,0.037  
5,52.699,rs13182372,0.027  
5,52.819,rs12521501,0.021  
5,52.960,rs10059238,0.012  
5,52.975,rs1553552,0.011  
5,53.022,rs16901697,0.010  
5,53.103,rs7706312,0.010  
5,53.118,rs7733163,0.011  
5,53.152,rs2052852,0.009  
5,53.154,rs6860464,0.009  
5,53.267,rs889216,0.006  
5,53.308,rs10039073,0.006  
5,53.328,rs438834,0.005  
5,53.335,rs328618,0.005  
5,53.384,rs283128,0.000  
5,53.411,rs10071707,0.000  
5,53.457,rs10066063,0.001  
5,53.563,rs157489,0.002  
5,53.682,rs4867105,0.002  
5,53.798,rs324433,0.008  
5,53.818,rs191241,0.001  
5,53.821,rs623435,0.003  
5,53.822,rs637396,0.002  
5,53.829,rs4867450,0.002  
5,53.829,rs603463,0.002  
5,53.884,rs10434584,0.002  
5,53.921,rs7717650,0.003  
5,53.994,rs6894230,0.004  
5,53.998,rs2112867,0.004  
5,54.008,rs818130,0.003  
5,54.040,rs1862523,0.003  
5,54.066,rs818126,0.000  
5,54.105,rs696831,-0.000  
5,54.182,rs1173756,-0.001

5,54.236,rs1173723,-0.005  
5,54.245,rs7722828,-0.005  
5,54.299,rs10472828,-0.005  
5,54.400,rs2877294,-0.003  
5,54.409,rs11954821,-0.003  
5,54.511,rs16890687,-0.002  
5,54.609,rs16890782,-0.002  
5,54.698,rs6450965,-0.001  
5,54.755,rs1438728,0.000  
5,54.845,rs256600,0.000  
5,54.868,rs4867517,-0.000  
5,54.915,rs29967,0.000  
5,54.961,rs16891337,-0.001  
5,54.971,rs408758,-0.001  
5,54.976,rs4242083,-0.000  
5,54.984,rs7730682,-0.000  
5,54.992,rs13171234,-0.000  
5,55.024,rs9791011,0.000  
5,55.205,rs12516835,0.008  
5,55.316,rs10062990,0.011  
5,55.861,rs2548032,0.039  
5,55.866,rs2591724,0.039  
5,55.867,rs1374017,0.038  
5,55.901,rs10521010,0.034  
5,55.934,rs35403,0.030  
5,55.951,rs3756464,0.034  
5,55.952,rs3822466,0.034  
5,55.959,rs250413,0.035  
5,55.965,rs2652130,0.036  
5,55.992,rs299596,0.030  
5,56.053,rs297622,0.015  
5,56.273,rs11743037,-0.000  
5,56.289,rs7449280,-0.001  
5,56.310,rs10066990,-0.001  
5,56.335,rs11738452,-0.002  
5,56.349,rs7736168,-0.004  
5,56.359,rs16903125,-0.010  
5,56.362,rs6885856,-0.010  
5,56.377,rs9292557,-0.019  
5,56.386,rs256323,-0.023  
5,56.413,rs448182,-0.012  
5,56.427,rs256295,-0.010  
5,56.447,rs3816325,-0.003  
5,56.497,rs889319,-0.001  
5,56.602,rs6893661,-0.001  
5,56.800,rs6893365,-0.002  
5,56.801,rs336463,-0.002  
5,56.802,rs6897719,-0.001  
5,56.818,rs6872783,-0.000  
5,56.827,rs1048944,-0.000  
5,56.837,rs6451173,-0.000  
5,56.946,rs16899972,-0.002  
5,57.003,rs37369,-0.006  
5,57.015,rs10038101,-0.006  
5,57.026,rs10941231,-0.006  
5,57.029,rs10941232,-0.006  
5,57.074,rs37389,-0.006  
5,57.262,rs1609500,-0.006  
5,57.301,rs7705676,-0.006  
5,57.588,rs16902013,-0.012  
5,57.668,rs286411,-0.013

5,57.717,rs10061088,-0.014  
5,57.719,rs4130679,-0.014  
5,57.732,rs4869623,-0.014  
5,57.740,rs3822735,-0.016  
5,57.761,rs1287267,-0.008  
5,57.826,rs37217,-0.014  
5,57.830,rs7731023,-0.015  
5,57.850,rs6872093,-0.016  
5,58.040,rs6890672,-0.024  
5,58.109,rs4351174,-0.024  
5,58.381,rs4242264,-0.039  
5,58.416,rs16903012,-0.041  
5,58.423,rs10512652,-0.041  
5,58.613,rs17358533,-0.066  
5,58.685,rs4391195,-0.072  
5,58.690,rs2562573,-0.073  
5,58.717,rs17290638,-0.062  
5,58.719,rs3776578,-0.075  
5,58.719,rs13168598,-0.077  
5,58.722,rs4869682,-0.076  
5,58.723,rs4869685,-0.076  
5,58.887,rs292182,-0.048  
5,58.990,rs17315781,-0.046  
5,59.227,rs10076102,-0.045  
5,59.462,rs2973086,-0.044  
5,59.528,rs10941368,-0.044  
5,59.597,rs1862573,-0.045  
5,59.642,rs889268,-0.046  
5,59.657,rs1895435,-0.045  
5,59.659,rs2910739,-0.045  
5,59.668,rs13187321,-0.044  
5,59.715,rs1423435,-0.041  
5,59.773,rs4574573,-0.039  
5,59.789,rs2216712,-0.031  
5,59.803,rs958502,-0.025  
5,59.810,rs4869558,-0.035  
5,59.825,rs2366837,-0.027  
5,60.224,rs16903824,-0.064  
5,60.447,rs270552,-0.090  
5,60.530,rs270537,-0.095  
5,60.774,rs2471055,-0.084  
5,60.848,rs13355907,-0.074  
5,60.865,rs3812048,-0.072  
5,60.887,rs3936162,-0.074  
5,60.944,rs4869449,-0.091  
5,61.191,rs16903908,-0.072  
5,61.199,rs2006889,-0.072  
5,61.471,rs2059835,-0.045  
5,61.472,rs16903957,-0.045  
5,61.547,rs6879807,-0.045  
5,61.608,rs3935014,-0.056  
5,61.654,rs2956597,-0.058  
5,62.087,rs3099115,-0.079  
5,62.239,rs10037882,-0.092  
5,62.350,rs12517759,-0.097  
5,62.465,rs7723735,-0.102  
5,62.471,rs10941406,-0.122  
5,62.528,rs9687972,-0.120  
5,62.568,rs11744747,-0.119  
5,62.589,rs6888067,-0.139  
5,62.759,rs395157,-0.127



5,62.765,rs6862959,-0.127  
5,62.795,rs2278325,-0.126  
5,62.839,rs1897140,-0.125  
5,63.327,rs2367894,-0.099  
5,63.375,rs358501,-0.096  
5,63.514,rs7710762,-0.091  
5,63.607,rs696737,-0.073  
5,63.621,rs17465965,-0.071  
5,63.640,rs696743,-0.071  
5,63.761,rs1362811,-0.070  
5,63.930,rs155378,-0.073  
5,64.061,rs3812042,-0.097  
5,64.077,rs700241,-0.099  
5,64.094,rs6884342,-0.101  
5,64.234,rs3849774,-0.126  
5,64.321,rs3909475,-0.150  
5,64.347,rs7735747,-0.147  
5,64.454,rs1501702,-0.134  
5,64.481,rs7721839,-0.129  
5,64.484,rs2962497,-0.129  
5,64.510,rs11956118,-0.127  
5,64.547,rs6451445,-0.123  
5,64.555,rs4957216,-0.121  
5,64.574,rs10038914,-0.116  
5,64.632,rs184782,-0.069  
5,64.649,rs46261,-0.064  
5,64.655,rs353396,-0.065  
5,64.708,rs6897022,-0.070  
5,64.787,rs7720838,-0.060  
5,64.860,rs11745901,-0.056  
5,64.971,rs10512747,-0.058  
5,64.975,rs323565,-0.073  
5,65.010,rs16870514,-0.065  
5,65.042,rs1078375,-0.059  
5,65.049,rs7736582,-0.059  
5,65.086,rs587412,-0.058  
5,65.322,rs440781,-0.043  
5,65.323,rs391781,-0.043  
5,65.353,rs920908,-0.050  
5,65.376,rs320615,-0.056  
5,65.392,rs1380996,-0.056  
5,65.403,rs10512771,-0.053  
5,65.412,rs318060,-0.050  
5,65.438,rs611647,-0.043  
5,65.463,rs669684,-0.036  
5,65.529,rs10512793,-0.031  
5,65.595,rs2231910,-0.032  
5,66.180,rs2972418,-0.042  
5,66.213,rs4410646,-0.042  
5,66.271,rs6180,-0.042  
5,66.316,rs10512806,-0.041  
5,66.323,rs11951328,-0.041  
5,66.361,rs3849698,-0.041  
5,66.390,rs6451664,-0.043  
5,66.432,rs11744749,-0.043  
5,66.452,rs17303482,-0.043  
5,66.490,rs7727047,-0.042  
5,66.582,rs6451722,-0.036  
5,66.654,rs7721923,-0.032  
5,66.775,rs11750845,-0.039  
5,66.793,rs9292907,-0.040

5,66.815,rs17320222,-0.041  
5,66.838,rs13169538,-0.041  
5,67.377,rs10052275,-0.043  
5,67.382,rs10940346,-0.049  
5,67.384,rs13355434,-0.050  
5,67.391,rs7705385,-0.052  
5,67.393,rs152926,-0.052  
5,67.395,rs250212,-0.056  
5,67.397,rs7446150,-0.061  
5,67.398,rs2962255,-0.072  
5,67.401,rs1039440,-0.073  
5,67.404,rs4141540,-0.061  
5,67.408,rs17824668,-0.079  
5,67.409,rs9291789,-0.082  
5,67.410,rs10471608,-0.083  
5,67.484,rs9291954,-0.068  
5,67.635,rs933779,-0.068  
5,67.654,rs16879682,-0.069  
5,67.675,rs10067693,-0.071  
5,67.694,rs2161956,-0.078  
5,67.699,rs10074909,-0.080  
5,67.764,rs7721698,-0.102  
5,67.858,rs10512982,-0.119  
5,67.903,rs13176939,-0.131  
5,68.071,rs2454585,-0.161  
5,68.114,rs1423570,-0.162  
5,68.143,rs11750248,-0.175  
5,68.228,rs1904162,-0.251  
5,68.388,rs2193968,-0.300  
5,68.529,rs6859355,-0.304  
5,68.581,rs252046,-0.334  
5,68.620,rs13161622,-0.367  
5,68.681,rs6872379,-0.383  
5,68.714,rs381575,-0.393  
5,68.843,rs702604,-0.414  
5,68.868,rs7701591,-0.427  
5,68.891,rs697112,-0.438  
5,68.899,rs6883658,-0.441  
5,68.968,rs31226,-0.462  
5,69.088,rs279743,-0.400  
5,69.122,rs3111643,-0.419  
5,69.134,rs6882064,-0.424  
5,69.154,rs16882764,-0.348  
5,69.193,rs4597914,-0.295  
5,69.209,rs7722951,-0.285  
5,69.260,rs10223063,-0.295  
5,69.355,rs2241403,-0.313  
5,69.411,rs10073644,-0.337  
5,69.478,rs2548621,-0.318  
5,69.479,rs2548620,-0.318  
5,69.517,rs11738700,-0.299  
5,69.526,rs16883196,-0.288  
5,69.562,rs11749226,-0.245  
5,69.600,rs6450233,-0.265  
5,69.699,rs12520102,-0.303  
5,69.712,rs13188578,-0.315  
5,69.737,rs1867685,-0.329  
5,69.955,rs17627141,-0.251  
5,70.025,rs1991497,-0.224  
5,70.048,rs6450270,-0.251  
5,70.049,rs3815916,-0.251

5,70.066,rs1423249,-0.248  
5,70.111,rs6875661,-0.228  
5,70.119,rs1876680,-0.225  
5,70.169,rs3105807,-0.208  
5,70.355,rs4865934,-0.150  
5,70.532,rs16884281,-0.105  
5,70.633,rs2161504,-0.086  
5,70.700,rs7707639,-0.087  
5,70.709,rs10069751,-0.087  
5,70.732,rs10059243,-0.091  
5,70.861,rs318802,-0.076  
5,70.889,rs321768,-0.073  
5,70.894,rs318791,-0.073  
5,70.939,rs10214316,-0.063  
5,70.942,rs309622,-0.063  
5,70.972,rs159546,-0.065  
5,71.184,rs32498,-0.041  
5,71.225,rs13328207,-0.031  
5,71.239,rs152318,-0.027  
5,71.272,rs11954699,-0.022  
5,71.380,rs10471421,-0.016  
5,71.496,rs157521,-0.030  
5,71.505,rs29995,-0.030  
5,71.510,rs30365,-0.030  
5,71.511,rs30364,-0.031  
5,71.519,rs30360,-0.031  
5,71.572,rs3852144,-0.032  
5,71.595,rs16885750,-0.033  
5,71.610,rs4700382,-0.033  
5,71.625,rs6891726,-0.033  
5,71.640,rs10040902,-0.033  
5,71.706,rs1479607,-0.048  
5,71.712,rs1279627,-0.048  
5,71.786,rs6872807,-0.027  
5,71.797,rs1292144,-0.026  
5,71.833,rs6898933,-0.025  
5,71.877,rs6862199,-0.024  
5,72.493,rs17732457,-0.029  
5,72.497,rs16886614,-0.029  
5,72.563,rs12659958,-0.028  
5,72.568,rs7706787,-0.035  
5,72.582,rs16886678,-0.063  
5,72.589,rs331031,-0.072  
5,72.798,rs831649,-0.045  
5,72.833,rs6866482,-0.048  
5,72.850,rs877454,-0.049  
5,72.861,rs10940547,-0.049  
5,72.885,rs952277,-0.049  
5,72.895,rs10471439,-0.049  
5,72.899,rs6898854,-0.048  
5,72.908,rs7727791,-0.048  
5,72.908,rs6877144,-0.048  
5,72.962,rs2910498,-0.047  
5,73.006,rs929809,-0.046  
5,73.017,rs230841,-0.046  
5,73.070,rs230844,-0.047  
5,73.086,rs7718757,-0.047  
5,73.115,rs2109479,-0.036  
5,73.122,rs702697,-0.036  
5,73.524,rs16887464,-0.038  
5,73.712,rs12658525,-0.035

5,73.712,rs13175618,-0.035  
5,73.855,rs12651995,-0.041  
5,73.968,rs6859725,-0.053  
5,74.004,rs6885426,-0.059  
5,74.149,rs11745219,-0.076  
5,74.173,rs10214231,-0.080  
5,74.220,rs245464,-0.088  
5,74.347,rs11948619,-0.101  
5,74.413,rs12153332,-0.104  
5,74.531,rs965795,-0.109  
5,74.624,rs293002,-0.109  
5,74.634,rs7717684,-0.113  
5,74.662,rs963443,-0.125  
5,74.698,rs7728528,-0.108  
5,74.731,rs1423359,-0.093  
5,74.738,rs159746,-0.092  
5,74.761,rs159384,-0.089  
5,74.767,rs925824,-0.090  
5,74.778,rs538776,-0.092  
5,74.785,rs7707901,-0.093  
5,74.926,rs1078368,-0.110  
5,74.963,rs10514870,-0.118  
5,75.028,rs10071163,-0.127  
5,75.062,rs1824788,-0.131  
5,75.067,rs1961,-0.132  
5,75.077,rs1345792,-0.132  
5,75.141,rs6450512,-0.137  
5,75.180,rs35305,-0.151  
5,75.235,rs296410,-0.224  
5,75.340,rs13179321,-0.235  
5,75.372,rs4699942,-0.244  
5,75.401,rs7710463,-0.248  
5,75.410,rs2963806,-0.250  
5,75.452,rs4700365,-0.253  
5,75.479,rs4235479,-0.286  
5,75.531,rs1423471,-0.323  
5,75.533,rs12188950,-0.323  
5,75.568,rs2061254,-0.328  
5,75.706,rs6868457,-0.366  
5,75.718,rs4700416,-0.370  
5,75.718,rs10044518,-0.370  
5,75.773,rs1550816,-0.340  
5,75.776,rs16892456,-0.361  
5,75.777,rs1971513,-0.367  
5,75.787,rs4699977,-0.440  
5,75.789,rs409912,-0.457  
5,75.793,rs7715669,-0.465  
5,75.796,rs1501841,-0.530  
5,75.799,rs36033,-0.540  
5,75.891,rs187574,-0.471  
5,75.907,rs2077786,-0.466  
5,76.504,rs2342989,-0.369  
5,76.610,rs2910475,-0.370  
5,76.615,rs3846465,-0.368  
5,76.644,rs1108159,-0.346  
5,76.681,rs153867,-0.319  
5,76.771,rs4700505,-0.266  
5,76.789,rs1005051,-0.243  
5,76.790,rs1900180,-0.241  
5,76.805,rs7708428,-0.196  
5,76.808,rs2642749,-0.193

5,76.827,rs3107556,-0.167  
5,76.885,rs1514577,-0.174  
5,76.906,rs168416,-0.168  
5,76.913,rs4235496,-0.169  
5,76.937,rs346420,-0.155  
5,76.940,rs346416,-0.153  
5,76.946,rs58736,-0.153  
5,76.996,rs7716031,-0.159  
5,77.061,rs1566780,-0.163  
5,77.071,rs7728227,-0.163  
5,77.072,rs10056912,-0.159  
5,77.078,rs13173277,-0.129  
5,77.084,rs1503519,-0.119  
5,77.090,rs10075443,-0.110  
5,77.121,rs1580312,-0.078  
5,77.135,rs358523,-0.095  
5,77.140,rs358528,-0.102  
5,77.392,rs7724701,-0.089  
5,77.460,rs13186658,-0.086  
5,77.519,rs10060705,-0.108  
5,77.542,rs10461497,-0.103  
5,77.566,rs275828,-0.112  
5,77.631,rs2034995,-0.091  
5,77.638,rs4518332,-0.091  
5,77.711,rs6861737,-0.087  
5,77.788,rs166473,-0.083  
5,77.818,rs264768,-0.077  
5,77.836,rs7710076,-0.073  
5,77.854,rs17206779,-0.054  
5,78.049,rs245526,-0.063  
5,78.109,rs16893963,-0.065  
5,78.228,rs40105,-0.068  
5,78.275,rs7711329,-0.062  
5,78.275,rs11957292,-0.062  
5,78.282,rs6866449,-0.058  
5,78.295,rs17185365,-0.051  
5,78.312,rs251312,-0.045  
5,78.466,rs27076,-0.043  
5,78.495,rs253223,-0.042  
5,78.500,rs187569,-0.052  
5,78.513,rs7700366,-0.068  
5,78.523,rs17251088,-0.074  
5,78.523,rs7717523,-0.074  
5,78.524,rs2914030,-0.084  
5,78.538,rs1465566,-0.074  
5,78.545,rs16895137,-0.072  
5,78.629,rs12655442,-0.050  
5,78.636,rs4700135,-0.055  
5,78.646,rs10940072,-0.064  
5,78.665,rs4499783,-0.067  
5,78.696,rs6871758,-0.089  
5,78.729,rs190480,-0.095  
5,78.748,rs30732,-0.093  
5,78.760,rs4700168,-0.092  
5,78.764,rs36138,-0.092  
5,78.789,rs461536,-0.090  
5,78.802,rs13180646,-0.090  
5,78.864,rs16896062,-0.090  
5,78.880,rs1946260,-0.142  
5,78.882,rs42325,-0.148  
5,78.882,rs40206,-0.150

5,78.882,rs706701,-0.150  
5,78.884,rs1083523,-0.150  
5,78.973,rs2548588,-0.104  
5,79.066,rs2271358,-0.104  
5,79.092,rs1560160,-0.104  
5,79.097,rs16896377,-0.103  
5,79.135,rs1627990,-0.097  
5,79.156,rs7721781,-0.096  
5,79.210,rs1835019,-0.097  
5,79.770,rs1428609,-0.080  
5,79.785,rs317976,-0.077  
5,79.835,rs2200863,-0.072  
5,79.840,rs4976077,-0.074  
5,79.859,rs17237481,-0.077  
5,79.906,rs4246766,-0.085  
5,79.965,rs4131890,-0.080  
5,80.025,rs6868612,-0.069  
5,80.045,rs7720751,-0.066  
5,80.126,rs9986158,-0.076  
5,80.129,rs282292,-0.065  
5,80.176,rs157445,-0.063  
5,80.178,rs12697058,-0.063  
5,80.196,rs6877998,-0.063  
5,80.312,rs282280,-0.042  
5,80.334,rs6449947,-0.049  
5,80.630,rs2302975,-0.034  
5,80.647,rs34306,-0.033  
5,80.739,rs34289,-0.030  
5,80.796,rs256497,-0.019  
5,80.881,rs7721613,-0.028  
5,80.945,rs830474,-0.031  
5,80.956,rs853812,-0.030  
5,81.024,rs706725,-0.026  
5,81.206,rs2607391,-0.028  
5,81.231,rs282416,-0.033  
5,81.255,rs10070379,-0.045  
5,81.267,rs12658051,-0.048  
5,81.288,rs26685,-0.045  
5,81.292,rs12516844,-0.046  
5,81.308,rs28289,-0.048  
5,81.338,rs2913277,-0.049  
5,81.403,rs4131295,-0.048  
5,81.439,rs10064315,-0.047  
5,81.521,rs337253,-0.046  
5,81.589,rs1185246,-0.026  
5,81.591,rs6450041,-0.026  
5,82.138,rs3761967,-0.022  
5,82.395,rs2242372,-0.013  
5,82.440,rs11949150,-0.011  
5,82.460,rs281121,-0.010  
5,82.461,rs2115031,-0.010  
5,82.507,rs6859438,-0.007  
5,82.526,rs7707837,-0.006  
5,82.578,rs6891713,-0.005  
5,82.714,rs2721775,-0.003  
5,82.889,rs3857397,-0.001  
5,82.900,rs898219,-0.001  
5,82.959,rs1217824,-0.000  
5,83.196,rs4569852,-0.009  
5,83.218,rs2337692,-0.010  
5,83.242,rs2118695,-0.009

5,83.251,rs6874186,-0.009  
5,83.295,rs10039706,-0.008  
5,83.361,rs7710169,-0.009  
5,83.471,rs9293273,-0.010  
5,83.573,rs13158670,-0.013  
5,83.585,rs10040192,-0.013  
5,83.759,rs246565,-0.009  
5,83.887,rs33425,-0.012  
5,84.058,rs2548331,-0.023  
5,84.302,rs549579,-0.039  
5,84.342,rs575415,-0.043  
5,84.389,rs7702108,-0.043  
5,84.393,rs4703597,-0.043  
5,84.509,rs4235676,-0.030  
5,84.540,rs9293560,-0.024  
5,84.840,rs6453008,-0.026  
5,84.850,rs12651911,-0.014  
5,84.863,rs819569,-0.017  
5,85.005,rs6890730,-0.017  
5,85.258,rs1038559,-0.012  
5,85.308,rs16870980,-0.013  
5,85.376,rs283622,-0.016  
5,85.394,rs411585,-0.017  
5,85.399,rs434008,-0.019  
5,85.405,rs16871035,-0.020  
5,85.491,rs2973536,-0.034  
5,85.512,rs17666430,-0.029  
5,85.578,rs255585,-0.016  
5,85.619,rs1818123,-0.014  
5,85.640,rs2840108,-0.013  
5,85.708,rs191899,-0.008  
5,85.710,rs10515174,-0.008  
5,85.756,rs4704111,-0.005  
5,85.786,rs292203,-0.004  
5,85.787,rs167111,-0.004  
5,85.791,rs2004500,-0.001  
5,85.813,rs10515165,0.001  
5,85.839,rs7723844,0.005  
5,85.839,rs2962622,0.005  
5,85.847,rs292209,0.006  
5,85.851,rs1460806,0.006  
5,85.866,rs569120,0.006  
5,85.892,rs922202,0.012  
5,86.014,rs10454913,0.014  
5,86.138,rs16871870,0.015  
5,86.144,rs294971,0.016  
5,86.156,rs1873365,0.015  
5,86.212,rs6453061,0.011  
5,86.236,rs2927633,0.010  
5,86.313,rs212925,0.015  
5,86.407,rs2173671,0.016  
5,86.420,rs1428558,0.016  
5,86.510,rs300245,0.014  
5,86.606,rs300259,0.020  
5,86.686,rs12152861,0.026  
5,86.717,rs6453072,0.028  
5,86.727,rs820841,0.016  
5,86.827,rs17561000,0.007  
5,86.843,rs6867972,0.002  
5,86.975,rs1164694,0.000  
5,87.172,rs1164624,-0.003

5,87.249,rs11739301,-0.006  
5,87.422,rs7728102,-0.010  
5,87.431,rs3934476,-0.002  
5,87.991,rs9293646,-0.002  
5,88.400,rs3846662,-0.001  
5,88.784,rs5744707,-0.001  
5,89.023,rs1001935,-0.002  
5,89.327,rs4487476,-0.009  
5,89.397,rs7731991,-0.005  
5,89.430,rs4425488,-0.004  
5,89.448,rs4235691,-0.008  
5,89.635,rs10434645,-0.003  
5,89.680,rs6879305,-0.002  
5,89.732,rs1002541,-0.001  
5,89.832,rs6879020,-0.001  
5,89.863,rs2937719,-0.000  
5,89.869,rs2937715,-0.000  
5,89.869,rs16873292,-0.000  
5,89.902,rs17747572,-0.000  
5,89.927,rs2972844,-0.000  
5,89.965,rs16873320,-0.002  
5,90.055,rs890708,-0.004  
5,90.097,rs4296785,-0.004  
5,90.162,rs6898214,-0.002  
5,90.207,rs2068434,-0.004  
5,90.233,rs7727095,-0.002  
5,90.242,rs7710225,-0.000  
5,90.278,rs6872396,-0.001  
5,90.421,rs961536,-0.017  
5,90.424,rs2069682,-0.018  
5,90.428,rs2069656,-0.018  
5,90.461,rs17748939,-0.024  
5,90.487,rs2287930,-0.029  
5,90.496,rs7734540,-0.029  
5,90.498,rs253093,-0.029  
5,90.501,rs17568154,-0.029  
5,90.513,rs2287933,-0.028  
5,90.567,rs7723344,-0.025  
5,90.607,rs2227800,-0.022  
5,90.635,rs168752,-0.020  
5,90.732,rs6453251,-0.015  
5,90.826,rs6453259,-0.012  
5,91.003,rs1715762,-0.014  
5,91.007,rs1613519,-0.014  
5,91.099,rs3792738,-0.016  
5,91.303,rs10066702,-0.020  
5,91.340,rs10473985,-0.020  
5,91.499,rs995743,-0.016  
5,91.549,rs1048834,-0.014  
5,91.596,rs12519589,-0.010  
5,91.597,rs10070420,-0.010  
5,91.646,rs16874057,-0.011  
5,91.647,rs963913,-0.011  
5,91.659,rs16874059,-0.011  
5,91.672,rs10462550,-0.010  
5,91.691,rs9687206,-0.009  
5,91.729,rs7702192,-0.011  
5,91.817,rs11949597,-0.010  
5,91.843,rs7732963,-0.010  
5,91.891,rs335644,-0.010  
5,91.897,rs2359877,-0.010



5,91.917,rs33204,-0.010  
5,92.111,rs6453323,-0.013  
5,92.137,rs4704434,-0.018  
5,92.137,rs7703420,-0.017  
5,92.153,rs3933483,-0.004  
5,92.172,rs6868555,-0.000  
5,92.279,rs2652210,0.003  
5,92.422,rs6884279,0.015  
5,92.444,rs6881736,0.010  
5,92.488,rs11948823,0.015  
5,92.490,rs10514128,0.015  
5,92.534,rs4704462,0.022  
5,92.539,rs4704464,0.022  
5,92.541,rs7712357,0.022  
5,92.600,rs355416,0.005  
5,92.600,rs355415,0.005  
5,92.605,rs6874954,0.002  
5,92.608,rs355412,0.001  
5,92.621,rs10078715,0.001  
5,93.003,rs4572979,0.005  
5,93.033,rs6881634,0.004  
5,93.053,rs4267850,0.004  
5,93.302,rs344651,-0.000  
5,93.388,rs9293757,-0.001  
5,93.478,rs340085,-0.003  
5,93.509,rs569523,-0.001  
5,93.522,rs6897874,-0.000  
5,93.525,rs2453766,-0.000  
5,93.554,rs252235,0.001  
5,93.559,rs6863289,0.004  
5,93.568,rs16875887,0.005  
5,93.570,rs7704939,0.005  
5,93.570,rs754567,0.012  
5,93.572,rs2173012,0.017  
5,93.597,rs11960862,0.020  
5,93.614,rs6453417,0.016  
5,93.620,rs16875961,0.019  
5,93.629,rs4704525,0.021  
5,93.725,rs337853,0.044  
5,93.742,rs338460,0.045  
5,93.794,rs337847,0.049  
5,93.818,rs163129,0.052  
5,93.911,rs1984685,0.060  
5,93.961,rs586199,0.065  
5,93.980,rs3797546,0.065  
5,94.383,rs7732902,0.073  
5,94.538,rs6859667,0.075  
5,94.573,rs4323213,0.075  
5,94.695,rs7713917,0.104  
5,94.936,rs4441859,0.119  
5,94.951,rs13171893,0.111  
5,94.983,rs6453481,0.106  
5,94.992,rs259129,0.105  
5,95.012,rs6453484,0.100  
5,95.017,rs1129770,0.099  
5,95.025,rs10043986,0.099  
5,95.029,rs259065,0.099  
5,95.043,rs9293789,0.101  
5,95.058,rs259074,0.098  
5,95.102,rs265008,0.071  
5,95.144,rs6865146,0.053

5,95.148,rs7707589,0.052  
5,95.282,rs2247450,0.034  
5,95.292,rs16877483,0.029  
5,95.295,rs1465852,0.043  
5,95.299,rs2015459,0.042  
5,95.308,rs10474010,0.055  
5,95.319,rs10057542,0.055  
5,95.331,rs4704618,0.055  
5,95.357,rs7721370,0.058  
5,95.407,rs7726099,0.065  
5,95.536,rs10062770,0.068  
5,95.563,rs259035,0.069  
5,95.569,rs13188088,0.069  
5,95.706,rs9687094,0.063  
5,95.753,rs185105,0.083  
5,96.043,rs26784,0.086  
5,96.150,rs32989,0.087  
5,96.306,rs11949801,0.089  
5,96.371,rs10491488,0.135  
5,96.413,rs857671,0.166  
5,96.414,rs7717830,0.166  
5,96.425,rs500676,0.168  
5,96.428,rs7706448,0.169  
5,96.474,rs9293829,0.166  
5,96.486,rs10491487,0.164  
5,96.552,rs26905,0.152  
5,96.571,rs27650,0.152  
5,96.585,rs696879,0.149  
5,96.678,rs34116,0.100  
5,96.691,rs2114972,0.110  
5,96.739,rs4703825,0.119  
5,96.744,rs7718438,0.097  
5,96.757,rs17227806,0.120  
5,96.786,rs11958318,0.129  
5,96.950,rs1039326,0.095  
5,96.981,rs6881927,0.088  
5,97.013,rs7729671,0.081  
5,97.110,rs3763142,0.064  
5,97.196,rs16898954,0.058  
5,97.345,rs10056236,0.048  
5,97.661,rs393766,0.049  
5,97.755,rs4703849,0.035  
5,97.858,rs1501791,0.033  
5,97.873,rs6886425,0.033  
5,97.917,rs1566629,0.033  
5,97.981,rs11960716,0.033  
5,98.111,rs1485587,0.035  
5,98.380,rs4703871,0.042  
5,98.391,rs10491245,0.042  
5,98.395,rs224938,0.031  
5,98.637,rs905221,0.050  
5,98.748,rs6876647,0.051  
5,98.883,rs4703545,0.050  
5,98.935,rs1827396,0.053  
5,99.092,rs6452479,0.074  
5,99.236,rs12658884,0.103  
5,99.255,rs1363948,0.105  
5,99.259,rs9283781,0.106  
5,99.268,rs6892289,0.105  
5,99.309,rs7725235,0.108  
5,99.410,rs6892129,0.101

5,99.487,rs10073948,0.074  
5,99.550,rs6859331,0.056  
5,99.761,rs12187956,0.054  
5,99.788,rs166278,0.055  
5,99.930,rs40213,0.050  
5,99.965,rs42754,0.049  
5,100.063,rs1479569,0.047  
5,100.182,rs1805377,0.064  
5,100.210,rs1445780,0.064  
5,100.240,rs33598,0.068  
5,100.296,rs10074448,0.071  
5,100.304,rs336944,0.069  
5,100.361,rs336965,0.065  
5,100.367,rs13168731,0.082  
5,100.385,rs7735782,0.086  
5,100.417,rs4703961,0.097  
5,100.499,rs6897626,0.153  
5,100.707,rs6882023,0.226  
5,100.738,rs10056609,0.225  
5,100.954,rs2301070,0.189  
5,101.048,rs7725025,0.130  
5,101.066,rs194124,0.131  
5,101.171,rs4590163,0.154  
5,101.240,rs350477,0.164  
5,101.261,rs2941228,0.164  
5,101.330,rs10041822,0.192  
5,101.361,rs10071420,0.198  
5,101.380,rs7710912,0.159  
5,101.384,rs6892080,0.156  
5,101.411,rs4461632,0.170  
5,101.420,rs1158242,0.182  
5,101.434,rs4235660,0.187  
5,101.445,rs16901251,0.189  
5,101.455,rs11950801,0.192  
5,101.461,rs11958924,0.191  
5,101.477,rs13171180,0.191  
5,101.484,rs3913424,0.191  
5,101.552,rs9968655,0.201  
5,101.615,rs4602659,0.197  
5,101.640,rs778233,0.196  
5,101.750,rs1366589,0.189  
5,101.830,rs4920699,0.205  
5,101.876,rs6874335,0.200  
5,101.880,rs13176279,0.200  
5,101.889,rs1500258,0.194  
5,101.910,rs7710314,0.177  
5,102.033,rs7733888,0.152  
5,102.046,rs2410719,0.149  
5,102.106,rs11950177,0.140  
5,102.157,rs2898543,0.130  
5,102.197,rs1493354,0.134  
5,102.347,rs6872716,0.125  
5,102.350,rs2112167,0.124  
5,102.388,rs6870700,0.116  
5,102.475,rs6861271,0.099  
5,102.521,rs10067098,0.090  
5,102.701,rs13179657,0.086  
5,102.761,rs710384,0.085  
5,102.789,rs710375,0.083  
5,102.795,rs16902822,0.083  
5,103.125,rs2582045,0.062

5,103.344,rs193689,0.073  
5,103.487,rs6452824,0.058  
5,103.592,rs6875289,0.048  
5,103.668,rs7702020,0.042  
5,103.817,rs4342357,0.037  
5,103.999,rs1449228,0.030  
5,104.118,rs10035607,0.027  
5,104.500,rs386138,0.035  
5,104.843,rs10060427,0.034  
5,104.898,rs2203822,0.035  
5,105.022,rs10213801,0.037  
5,105.053,rs16869330,0.036  
5,105.082,rs2010355,0.035  
5,105.101,rs10454910,0.033  
5,105.136,rs4458614,0.043  
5,105.161,rs6452944,0.041  
5,105.184,rs2941894,0.039  
5,105.241,rs6452949,0.037  
5,105.322,rs1661037,0.039  
5,105.348,rs17641623,0.040  
5,105.397,rs2202510,0.045  
5,105.417,rs7716797,0.045  
5,105.498,rs13168674,0.037  
5,105.522,rs12188200,0.035  
5,105.544,rs7709237,0.029  
5,105.556,rs1532694,0.026  
5,105.565,rs972727,0.023  
5,105.576,rs10075131,0.020  
5,105.598,rs34963,0.018  
5,105.600,rs1422168,0.019  
5,105.623,rs154809,0.020  
5,105.643,rs17082593,0.020  
5,105.651,rs1422164,0.020  
5,105.668,rs17082603,0.020  
5,105.716,rs10057574,0.021  
5,105.781,rs34508,0.023  
5,105.881,rs13188341,0.022  
5,105.962,rs4242245,0.022  
5,106.000,rs4434363,0.021  
5,106.001,rs7701128,0.021  
5,106.033,rs13166639,0.026  
5,106.243,rs10042892,0.021  
5,106.358,rs9285013,0.020  
5,106.450,rs17314172,0.021  
5,106.466,rs11135394,0.021  
5,106.802,rs981862,0.008  
5,106.932,rs2160758,0.001  
5,106.946,rs952664,0.001  
5,107.069,rs392632,0.001  
5,107.115,rs1124667,0.001  
5,107.163,rs954490,0.000  
5,107.253,rs153898,-0.000  
5,107.260,rs27005,-0.000  
5,107.290,rs26999,-0.000  
5,107.320,rs457891,0.000  
5,107.326,rs293033,0.000  
5,107.341,rs1437118,0.000  
5,107.444,rs1895865,-0.000  
5,107.456,rs1426095,-0.000  
5,107.468,rs7732431,-0.001  
5,107.477,rs3852192,-0.001

5,107.505,rs251076,-0.000  
5,107.591,rs33809,-0.001  
5,107.676,rs2560266,-0.005  
5,107.685,rs253720,-0.002  
5,107.701,rs6894872,-0.000  
5,107.704,rs2162716,-0.000  
5,107.751,rs12516085,-0.000  
5,107.846,rs17084933,-0.000  
5,107.873,rs11747129,-0.000  
5,107.898,rs461873,-0.000  
5,107.976,rs13188464,-0.002  
5,107.980,rs3777218,-0.000  
5,108.000,rs6556882,-0.000  
5,108.014,rs9314160,-0.001  
5,108.016,rs871775,-0.001  
5,108.050,rs248340,-0.005  
5,108.063,rs147295,-0.005  
5,108.076,rs13174591,-0.005  
5,108.198,rs10428702,-0.004  
5,108.380,rs6864629,-0.003  
5,108.484,rs436321,-0.005  
5,108.497,rs3762986,-0.009  
5,108.525,rs269853,-0.008  
5,108.527,rs6860611,-0.008  
5,108.531,rs155437,-0.008  
5,108.578,rs11135467,-0.009  
5,108.626,rs261212,-0.002  
5,108.639,rs2611713,-0.006  
5,108.646,rs155041,-0.010  
5,108.651,rs155054,-0.011  
5,108.669,rs1862182,-0.012  
5,108.701,rs10053056,-0.013  
5,108.721,rs149313,-0.011  
5,108.746,rs25862,-0.006  
5,108.768,rs30333,-0.005  
5,108.829,rs2549779,-0.006  
5,108.857,rs7714122,-0.006  
5,108.937,rs11746232,-0.006  
5,108.945,rs27439,-0.006  
5,108.994,rs31016,-0.008  
5,109.013,rs13167790,-0.007  
5,109.026,rs39597,-0.009  
5,109.051,rs3734010,-0.001  
5,109.053,rs10515255,-0.001  
5,109.220,rs2351732,-0.000  
5,109.344,rs6894105,0.001  
5,109.459,rs1429863,0.003  
5,109.598,rs1423319,0.006  
5,109.638,rs1423322,0.004  
5,109.639,rs4362966,0.004  
5,109.652,rs257239,0.005  
5,109.662,rs4482923,0.005  
5,109.722,rs10866786,0.007  
5,109.725,rs17088027,0.007  
5,109.766,rs6889798,0.003  
5,109.768,rs7725828,0.003  
5,109.815,rs9314227,0.001  
5,109.925,rs1378438,-0.000  
5,109.983,rs1037599,-0.001  
5,110.023,rs10515276,-0.001  
5,110.120,rs2112145,-0.004

5,110.193,rs992592,-0.007  
5,110.246,rs331934,-0.011  
5,110.461,rs10057320,-0.010  
5,110.516,rs17166548,-0.012  
5,110.638,rs12109262,-0.014  
5,110.760,rs2030605,-0.017  
5,111.046,rs2369754,-0.021  
5,111.112,rs2602970,-0.022  
5,111.118,rs2602972,-0.026  
5,111.133,rs9326958,-0.027  
5,111.334,rs1504534,-0.050  
5,111.337,rs10515301,-0.050  
5,111.396,rs4703100,-0.054  
5,111.434,rs6862495,-0.052  
5,111.476,rs2544911,-0.051  
5,111.526,rs563361,-0.050  
5,111.569,rs11949216,-0.033  
5,111.604,rs6860058,-0.024  
5,111.641,rs3907457,-0.015  
5,111.663,rs12654056,-0.012  
5,111.689,rs4490561,-0.010  
5,111.763,rs6861497,-0.006  
5,111.800,rs598440,-0.007  
5,111.861,rs2400796,-0.006  
5,111.922,rs2657449,-0.004  
5,111.974,rs6868471,-0.007  
5,111.978,rs1363786,-0.007  
5,112.061,rs11744885,-0.003  
5,112.113,rs2561481,-0.002  
5,112.132,rs6596533,-0.003  
5,112.138,rs3846615,-0.003  
5,112.154,rs34236,-0.008  
5,112.162,rs808042,-0.010  
5,112.200,rs7349833,-0.012  
5,112.256,rs950664,-0.005  
5,112.280,rs6596557,-0.004  
5,112.372,rs1922495,-0.003  
5,112.480,rs2715841,-0.002  
5,112.580,rs1372501,-0.006  
5,112.607,rs325523,-0.007  
5,112.717,rs1612927,-0.005  
5,112.737,rs319897,-0.003  
5,112.765,rs7704764,-0.001  
5,112.767,rs1370955,-0.001  
5,112.802,rs10479307,-0.001  
5,112.879,rs1428878,-0.000  
5,112.953,rs7702850,0.000  
5,112.991,rs4128686,0.001  
5,112.996,rs4588563,0.001  
5,113.118,rs11739877,0.000  
5,113.133,rs4957661,0.000  
5,113.158,rs7710861,-0.000  
5,113.169,rs4301221,-0.000  
5,113.234,rs2410869,-0.002  
5,113.270,rs9327976,-0.001  
5,113.272,rs12109609,-0.001  
5,113.344,rs296200,-0.000  
5,113.379,rs159404,-0.001  
5,113.439,rs7706863,-0.003  
5,113.447,rs4421088,-0.003  
5,113.456,rs6880898,-0.004

5,113.543,rs4382152,-0.005  
5,113.619,rs10900899,0.000  
5,113.648,rs34566,0.001  
5,113.650,rs1363896,0.001  
5,113.817,rs7713807,0.000  
5,114.107,rs252991,-0.002  
5,114.201,rs152580,-0.003  
5,114.229,rs26247,-0.010  
5,114.330,rs25976,-0.029  
5,114.378,rs153118,-0.035  
5,114.394,rs17534319,-0.038  
5,114.498,rs467089,-0.058  
5,114.626,rs9328010,-0.025  
5,114.820,rs6887589,-0.006  
5,114.842,rs173644,-0.001  
5,114.845,rs10052705,-0.001  
5,114.852,rs7708590,-0.001  
5,114.859,rs1974789,-0.001  
5,114.861,rs6888461,-0.001  
5,114.871,rs4957724,-0.006  
5,114.891,rs998906,-0.003  
5,114.898,rs11743737,-0.003  
5,114.945,rs13176829,-0.003  
5,114.966,rs12515105,-0.003  
5,115.106,rs12517224,-0.007  
5,115.135,rs10050689,-0.009  
5,115.136,rs9326745,-0.010  
5,115.203,rs17161562,-0.009  
5,115.219,rs7735749,-0.009  
5,115.249,rs1896582,-0.008  
5,115.300,rs6864212,-0.008  
5,115.322,rs6877265,-0.011  
5,115.323,rs1990892,-0.011  
5,115.416,rs11241027,-0.004  
5,115.610,rs1432805,-0.001  
5,115.640,rs2033463,-0.001  
5,115.702,rs36811,-0.000  
5,115.715,rs17596440,-0.001  
5,115.788,rs2416227,-0.004  
5,115.800,rs1563324,-0.005  
5,115.810,rs1455554,-0.006  
5,115.855,rs2966752,-0.010  
5,115.907,rs7717231,-0.021  
5,115.963,rs4460176,-0.027  
5,116.034,rs4330505,-0.030  
5,116.694,rs6594475,-0.034  
5,116.932,rs17132718,-0.054  
5,116.996,rs7723819,-0.042  
5,117.109,rs1806353,-0.044  
5,117.181,rs919334,-0.040  
5,117.280,rs216535,-0.040  
5,117.331,rs306079,-0.043  
5,117.409,rs3797755,-0.044  
5,117.424,rs306117,-0.043  
5,117.570,rs3733995,-0.038  
5,117.579,rs42670,-0.039  
5,117.658,rs247527,-0.041  
5,117.818,rs6885593,-0.028  
5,117.868,rs1154308,-0.033  
5,117.994,rs529279,-0.023  
5,118.013,rs192276,-0.020

5,118.121,rs10073581,-0.012  
5,118.126,rs10515441,-0.012  
5,118.127,rs2140623,-0.010  
5,118.128,rs6594590,-0.009  
5,118.130,rs163618,-0.006  
5,118.171,rs3934641,-0.000  
5,118.206,rs6887003,0.000  
5,118.211,rs7446319,0.000  
5,118.228,rs4355511,0.002  
5,118.235,rs17134832,0.002  
5,118.241,rs4705739,0.001  
5,118.497,rs9784647,0.024  
5,118.679,rs569540,0.034  
5,118.709,rs17135534,0.035  
5,118.909,rs1864063,0.028  
5,118.921,rs10519361,0.027  
5,118.982,rs1871916,0.028  
5,119.034,rs17135999,0.037  
5,119.037,rs10477505,0.038  
5,119.137,rs11950195,0.059  
5,119.157,rs6594771,0.058  
5,119.179,rs6894635,0.055  
5,119.221,rs12658199,0.051  
5,119.269,rs11241258,0.046  
5,119.293,rs2632151,0.043  
5,119.341,rs1487222,0.032  
5,119.503,rs6594807,0.035  
5,119.545,rs2416366,0.037  
5,119.580,rs36935,0.050  
5,119.650,rs337715,0.037  
5,119.826,rs6869551,0.036  
5,119.885,rs17137452,0.029  
5,119.890,rs2974617,0.028  
5,119.892,rs6866580,0.028  
5,119.944,rs10076833,0.032  
5,119.974,rs2100521,0.034  
5,119.981,rs2925178,0.035  
5,120.013,rs751485,0.050  
5,120.014,rs2166339,0.050  
5,120.017,rs269537,0.050  
5,120.029,rs269526,0.049  
5,120.057,rs2112613,0.051  
5,120.065,rs9687184,0.038  
5,120.078,rs7712026,0.038  
5,120.096,rs256975,0.036  
5,120.142,rs1820631,0.032  
5,120.165,rs465437,0.032  
5,120.171,rs251890,0.032  
5,120.228,rs1529453,0.041  
5,120.265,rs154763,0.047  
5,120.309,rs258737,0.060  
5,120.433,rs152367,0.077  
5,120.525,rs252738,0.101  
5,120.590,rs156666,0.117  
5,120.686,rs6866413,0.115  
5,120.689,rs7341066,0.116  
5,120.719,rs12187953,0.129  
5,120.732,rs10044122,0.134  
5,120.770,rs17138656,0.146  
5,120.796,rs1428089,0.145  
5,120.815,rs11241350,0.145



5,120.851,rs1541802,0.144  
5,121.703,rs1963858,0.092  
5,121.784,rs154601,0.090  
5,121.789,rs1014643,0.090  
5,121.791,rs32972,0.109  
5,121.792,rs32974,0.110  
5,121.811,rs153644,0.130  
5,121.821,rs7721479,0.136  
5,121.847,rs154577,0.162  
5,121.854,rs7702266,0.169  
5,121.897,rs10077439,0.208  
5,121.906,rs254230,0.216  
5,122.001,rs13361662,0.248  
5,122.028,rs607930,0.256  
5,122.038,rs632993,0.223  
5,122.061,rs680404,0.210  
5,122.068,rs635958,0.208  
5,122.336,rs2068933,0.130  
5,122.364,rs13188755,0.120  
5,122.369,rs6892910,0.119  
5,122.379,rs2933646,0.116  
5,122.444,rs2937067,0.118  
5,122.472,rs698377,0.138  
5,122.573,rs698384,0.248  
5,122.613,rs6876340,0.255  
5,122.642,rs2112342,0.252  
5,122.784,rs6866207,0.239  
5,122.943,rs930922,0.266  
5,123.023,rs12521805,0.277  
5,123.036,rs6872138,0.277  
5,123.133,rs6862540,0.276  
5,123.178,rs2036023,0.276  
5,123.300,rs1021516,0.283  
5,123.589,rs4457117,0.265  
5,123.687,rs2624495,0.264  
5,123.782,rs13164296,0.265  
5,124.000,rs265893,0.285  
5,124.057,rs9327050,0.291  
5,124.340,rs6887429,0.319  
5,124.443,rs4302625,0.337  
5,124.500,rs6595079,0.321  
5,124.517,rs9327065,0.315  
5,124.523,rs10037996,0.313  
5,124.727,rs6882527,0.224  
5,124.748,rs7711344,0.216  
5,124.759,rs6595125,0.212  
5,124.786,rs4329039,0.213  
5,124.816,rs3924079,0.215  
5,124.831,rs6595143,0.218  
5,124.870,rs1002916,0.215  
5,124.877,rs2043048,0.216  
5,124.883,rs1429736,0.215  
5,124.898,rs2914908,0.218  
5,124.922,rs1429708,0.229  
5,124.948,rs7727675,0.246  
5,125.098,rs259174,0.378  
5,125.350,rs11747748,0.543  
5,125.520,rs11948980,0.569  
5,125.636,rs246210,0.606  
5,125.772,rs1428710,0.609  
5,125.835,rs6885430,0.603

5,125.864,rs11241609,0.605  
5,125.885,rs1508805,0.602  
5,125.938,rs1876648,0.576  
5,125.971,rs10056717,0.570  
5,125.977,rs17148296,0.573  
5,126.040,rs6595322,0.614  
5,126.090,rs1560550,0.647  
5,126.111,rs4632823,0.655  
5,126.149,rs9637910,0.672  
5,126.312,rs3900446,0.740  
5,126.314,rs2560302,0.752  
5,126.451,rs992788,0.940  
5,126.588,rs17434434,0.955  
5,126.848,rs6866750,0.963  
5,126.950,rs4629597,0.966  
5,126.970,rs7727904,0.960  
5,127.065,rs17149450,0.871  
5,127.213,rs1545696,0.886  
5,127.283,rs3776184,0.909  
5,127.287,rs929772,0.910  
5,127.289,rs4836483,0.936  
5,127.290,rs10519721,0.935  
5,127.370,rs1030179,0.936  
5,127.387,rs11748635,0.869  
5,127.416,rs9687603,0.838  
5,127.586,rs2067077,0.753  
5,127.640,rs6595498,0.752  
5,127.747,rs10076322,0.753  
5,127.751,rs4240372,0.759  
5,127.767,rs989919,0.771  
5,127.842,rs17151283,0.825  
5,127.866,rs37391,0.835  
5,127.895,rs12188854,0.849  
5,127.940,rs149533,0.844  
5,128.047,rs920997,0.821  
5,128.176,rs895298,0.834  
5,128.193,rs7705687,0.860  
5,128.242,rs393547,0.838  
5,128.254,rs4568357,0.821  
5,128.267,rs6890381,0.850  
5,128.272,rs4574539,0.860  
5,128.393,rs1494671,0.897  
5,128.436,rs6873640,0.845  
5,128.547,rs6862252,0.873  
5,128.550,rs7721111,0.871  
5,128.574,rs6595536,0.854  
5,128.604,rs4616890,0.839  
5,128.636,rs4836112,0.848  
5,128.735,rs10069971,0.800  
5,128.763,rs6882715,0.839  
5,128.790,rs4357032,0.798  
5,128.852,rs930606,0.759  
5,128.995,rs2028855,0.660  
5,129.020,rs6875187,0.652  
5,129.079,rs4240388,0.633  
5,129.109,rs6874416,0.630  
5,129.254,rs7735615,0.603  
5,129.286,rs1550363,0.604  
5,129.299,rs6868078,0.624  
5,129.341,rs1439593,0.686  
5,129.342,rs6595591,0.687

5,129.356,rs1550370,0.695  
5,129.365,rs920386,0.701  
5,129.381,rs10075641,0.700  
5,129.453,rs1347924,0.691  
5,129.481,rs17152569,0.675  
5,129.500,rs1530121,0.664  
5,129.554,rs10519815,0.637  
5,129.576,rs13354270,0.634  
5,129.679,rs2678173,0.625  
5,129.729,rs7736468,0.621  
5,129.772,rs1400870,0.617  
5,129.839,rs331746,0.618  
5,129.840,rs331744,0.620  
5,129.845,rs7712191,0.626  
5,129.855,rs2125139,0.638  
5,129.904,rs9327361,0.633  
5,129.925,rs330339,0.631  
5,129.931,rs6595634,0.623  
5,129.938,rs2431597,0.615  
5,129.941,rs17153316,0.622  
5,129.945,rs2431598,0.582  
5,129.949,rs329174,0.577  
5,129.964,rs327826,0.542  
5,130.107,rs327816,0.571  
5,130.124,rs10042047,0.571  
5,130.181,rs6859953,0.573  
5,130.196,rs955626,0.572  
5,130.232,rs10042286,0.570  
5,130.246,rs11747637,0.569  
5,130.415,rs918440,0.616  
5,130.417,rs6595693,0.623  
5,130.431,rs7733479,0.672  
5,130.460,rs11740466,0.662  
5,130.485,rs11241891,0.662  
5,130.494,rs4426911,0.617  
5,130.506,rs6886050,0.660  
5,130.528,rs4836266,0.734  
5,130.560,rs11953659,0.742  
5,130.564,rs4836271,0.733  
5,130.578,rs12513847,0.619  
5,130.589,rs6870785,0.533  
5,130.650,rs7701818,0.456  
5,130.672,rs7720178,0.429  
5,130.703,rs907195,0.364  
5,130.726,rs2036846,0.355  
5,130.730,rs2271353,0.354  
5,130.746,rs3812062,0.351  
5,130.787,rs3805739,0.340  
5,130.800,rs17165293,0.343  
5,130.978,rs6870711,0.381  
5,130.989,rs3936305,0.382  
5,131.271,rs6894441,0.376  
5,131.415,rs3909885,0.444  
5,131.454,rs791333,0.453  
5,131.463,rs10478774,0.422  
5,131.550,rs791077,0.436  
5,131.560,rs7711139,0.438  
5,132.106,rs1520246,0.340  
5,132.200,rs9327462,0.323  
5,132.252,rs251215,0.321  
5,132.262,rs2307108,0.321

5,132.269,rs32215,0.275  
5,132.276,rs331095,0.260  
5,132.280,rs3805646,0.261  
5,132.281,rs3805648,0.262  
5,132.321,rs10072361,0.278  
5,132.344,rs6891265,0.286  
5,132.359,rs17165184,0.277  
5,132.368,rs2059124,0.271  
5,132.396,rs2312243,0.253  
5,132.416,rs7732209,0.245  
5,132.461,rs17618074,0.237  
5,132.512,rs10054567,0.229  
5,132.642,rs252671,0.204  
5,132.689,rs7717089,0.168  
5,132.819,rs10077875,0.178  
5,132.843,rs12515721,0.183  
5,133.231,rs1363475,0.177  
5,133.271,rs6858978,0.188  
5,133.297,rs6869219,0.194  
5,133.298,rs11741204,0.194  
5,133.830,rs3805685,0.189  
5,133.845,rs7733814,0.189  
5,133.912,rs272873,0.189  
5,133.939,rs2073643,0.189  
5,133.944,rs7705826,0.187  
5,133.974,rs7703230,0.192  
5,134.022,rs743562,0.168  
5,134.027,rs2069812,0.168  
5,134.060,rs2522391,0.171  
5,134.094,rs2243204,0.174  
5,134.114,rs1468216,0.179  
5,134.167,rs803139,0.187  
5,134.197,rs7721926,0.206  
5,134.214,rs42395,0.217  
5,134.296,rs3885730,0.224  
5,134.343,rs7730747,0.237  
5,134.388,rs4515334,0.245  
5,134.476,rs2162769,0.241  
5,134.483,rs3828692,0.244  
5,134.497,rs736324,0.250  
5,134.506,rs959727,0.256  
5,134.521,rs11741756,0.256  
5,134.528,rs17681747,0.252  
5,134.529,rs890815,0.251  
5,134.589,rs10900816,0.213  
5,134.602,rs7708975,0.191  
5,134.603,rs10515457,0.190  
5,134.663,rs4958121,0.216  
5,134.690,rs700715,0.193  
5,134.714,rs7729507,0.185  
5,134.755,rs25869,0.191  
5,134.783,rs718410,0.224  
5,134.788,rs246961,0.230  
5,134.797,rs27986,0.234  
5,134.819,rs1366604,0.236  
5,134.834,rs397649,0.236  
5,134.847,rs700703,0.236  
5,134.872,rs187411,0.206  
5,135.062,rs9327661,0.203  
5,135.112,rs4958095,0.184  
5,135.132,rs4958144,0.177

5,135.157,rs6596146,0.177  
5,135.218,rs11749241,0.166  
5,135.311,rs4958148,0.150  
5,135.316,rs17700949,0.149  
5,135.322,rs17166987,0.148  
5,135.329,rs1109309,0.146  
5,135.472,rs731432,0.118  
5,135.481,rs3909368,0.116  
5,135.564,rs17167104,0.098  
5,135.591,rs1644308,0.092  
5,135.627,rs10055533,0.106  
5,135.652,rs1618181,0.139  
5,135.660,rs6874189,0.146  
5,135.661,rs3936585,0.147  
5,135.681,rs6865260,0.161  
5,135.755,rs10068191,0.185  
5,135.772,rs10074308,0.185  
5,135.849,rs244669,0.180  
5,135.853,rs244689,0.180  
5,135.977,rs17165388,0.167  
5,136.053,rs258514,0.169  
5,136.056,rs258522,0.174  
5,136.066,rs17644077,0.193  
5,136.073,rs329115,0.193  
5,136.087,rs2084007,0.194  
5,136.093,rs329317,0.194  
5,136.188,rs435397,0.210  
5,136.190,rs10463924,0.211  
5,136.286,rs6596189,0.246  
5,136.314,rs254551,0.257  
5,136.432,rs495406,0.288  
5,136.462,rs641455,0.273  
5,136.550,rs11950409,0.188  
5,136.552,rs12514014,0.186  
5,136.558,rs631607,0.182  
5,136.568,rs2019973,0.173  
5,136.572,rs6896456,0.182  
5,136.581,rs17168022,0.192  
5,136.611,rs2603021,0.237  
5,136.651,rs2652092,0.227  
5,136.664,rs13163460,0.223  
5,136.697,rs3756366,0.225  
5,136.840,rs12520809,0.182  
5,136.943,rs6882472,0.193  
5,137.238,rs7732567,0.203  
5,137.306,rs31265,0.164  
5,137.324,rs2521968,0.151  
5,137.454,rs17168882,0.154  
5,137.516,rs17168961,0.155  
5,137.799,rs17169180,0.197  
5,137.876,rs4976375,0.173  
5,137.941,rs1557918,0.197  
5,138.040,rs31551,0.194  
5,138.042,rs30743,0.190  
5,138.045,rs30746,0.202  
5,138.075,rs6880837,0.178  
5,138.091,rs7715300,0.179  
5,138.233,rs2673925,0.188  
5,138.260,rs346658,0.159  
5,138.304,rs10042003,0.139  
5,138.373,rs4976518,0.137

5,138.659,rs2214993,0.143  
5,138.773,rs17170751,0.109  
5,138.820,rs4308478,0.096  
5,138.824,rs12188192,0.095  
5,138.835,rs10434747,0.117  
5,138.851,rs1434660,0.156  
5,138.873,rs4976428,0.145  
5,138.877,rs2961639,0.133  
5,138.884,rs17171354,0.139  
5,138.897,rs1229742,0.150  
5,138.902,rs1229724,0.144  
5,138.907,rs6893152,0.139  
5,138.922,rs1544028,0.124  
5,138.933,rs10058264,0.117  
5,138.938,rs2189082,0.114  
5,138.943,rs6878439,0.113  
5,138.958,rs4371746,0.112  
5,139.261,rs13159624,0.108  
5,139.378,rs4835696,0.121  
5,139.380,rs7379760,0.121  
5,139.388,rs165193,0.081  
5,139.389,rs165195,0.082  
5,139.427,rs165185,0.084  
5,139.429,rs356478,0.082  
5,139.430,rs2336977,0.088  
5,139.441,rs2878853,0.076  
5,139.503,rs3777102,0.105  
5,139.527,rs4912936,0.114  
5,139.573,rs264347,0.111  
5,139.581,rs6891114,0.111  
5,139.593,rs265158,0.111  
5,139.604,rs7734418,0.109  
5,139.625,rs155939,0.110  
5,139.706,rs2436391,0.129  
5,140.345,rs10037757,0.096  
5,140.541,rs155806,0.089  
5,140.631,rs31746,0.086  
5,140.678,rs415388,0.096  
5,140.705,rs17208551,0.114  
5,140.710,rs17097812,0.115  
5,140.757,rs10063472,0.128  
5,140.880,rs17097850,0.135  
5,140.888,rs4141206,0.132  
5,140.898,rs3861854,0.132  
5,140.989,rs2434322,0.122  
5,140.999,rs164078,0.114  
5,141.013,rs6580209,0.104  
5,141.039,rs164495,0.110  
5,141.137,rs164080,0.123  
5,141.149,rs6580215,0.125  
5,141.174,rs163918,0.132  
5,141.338,rs12655443,0.165  
5,141.598,rs11738456,0.194  
5,141.660,rs2906057,0.213  
5,141.783,rs4912636,0.235  
5,141.968,rs959662,0.266  
5,142.118,rs254441,0.314  
5,142.167,rs1864003,0.321  
5,142.321,rs4912639,0.351  
5,142.353,rs11167777,0.352  
5,142.382,rs10155516,0.396

5,142.442,rs249733,0.404  
5,142.594,rs17706715,0.384  
5,142.661,rs13179022,0.413  
5,142.667,rs34000,0.420  
5,142.682,rs2299022,0.431  
5,142.688,rs2282794,0.438  
5,142.734,rs34016,0.497  
5,142.751,rs10069453,0.518  
5,142.759,rs249917,0.529  
5,142.916,rs11167790,0.515  
5,142.977,rs11750924,0.512  
5,143.203,rs11167792,0.494  
5,143.341,rs40127,0.507  
5,143.396,rs463717,0.508  
5,143.677,rs37195,0.510  
5,143.796,rs3756387,0.488  
5,143.897,rs3776331,0.481  
5,144.097,rs3756374,0.540  
5,144.106,rs246599,0.557  
5,144.129,rs258799,0.500  
5,144.145,rs6887887,0.492  
5,144.197,rs6894946,0.467  
5,144.299,rs258820,0.424  
5,144.304,rs1438734,0.423  
5,144.332,rs154786,0.418  
5,144.434,rs244465,0.441  
5,144.647,rs6877893,0.486  
5,144.830,rs4607376,0.500  
5,145.053,rs4912922,0.494  
5,145.114,rs7700977,0.497  
5,145.341,rs152225,0.564  
5,145.444,rs6869733,0.592  
5,145.455,rs2910256,0.594  
5,145.565,rs7707734,0.571  
5,146.103,rs318373,0.439  
5,146.135,rs160790,0.437  
5,146.195,rs17369132,0.431  
5,146.224,rs3924119,0.429  
5,146.249,rs1862140,0.427  
5,146.376,rs723223,0.391  
5,146.515,rs165445,0.327  
5,146.656,rs2400170,0.325  
5,146.870,rs4509079,0.308  
5,146.903,rs1368434,0.299  
5,147.033,rs7734685,0.301  
5,147.191,rs10477291,0.346  
5,147.217,rs10053569,0.347  
5,147.225,rs2195929,0.357  
5,147.242,rs10037373,0.375  
5,147.246,rs7701544,0.374  
5,147.923,rs1201598,0.348  
5,148.040,rs13167316,0.300  
5,148.049,rs2116800,0.298  
5,148.079,rs17104645,0.306  
5,148.241,rs7709368,0.298  
5,148.456,rs2400228,0.266  
5,148.628,rs161041,0.234  
5,148.996,rs7713487,0.172  
5,149.047,rs1383169,0.156  
5,149.103,rs7723948,0.140  
5,149.142,rs728937,0.144

5,149.160,rs12659167,0.145  
5,149.269,rs40474,0.166  
5,149.280,rs40473,0.171  
5,149.317,rs30983,0.162  
5,149.395,rs891898,0.139  
5,149.461,rs17468085,0.129  
5,149.491,rs7724577,0.123  
5,149.499,rs4705158,0.123  
5,149.526,rs17547112,0.099  
5,149.541,rs17547243,0.100  
5,149.591,rs889829,0.101  
5,149.903,rs7706630,0.086  
5,149.986,rs2194156,0.066  
5,150.004,rs10075595,0.060  
5,150.030,rs17106906,0.052  
5,150.035,rs2400440,0.053  
5,150.086,rs6580511,0.034  
5,150.166,rs7707803,0.028  
5,150.301,rs2303067,0.029  
5,150.436,rs7732604,0.028  
5,150.466,rs12186491,0.030  
5,150.821,rs17639006,0.059  
5,150.837,rs4597955,0.060  
5,150.955,rs13359903,0.059  
5,151.020,rs4280857,0.057  
5,151.035,rs7711800,0.057  
5,151.228,rs2400642,0.045  
5,151.273,rs2163752,0.038  
5,151.313,rs9285673,0.025  
5,151.348,rs877741,0.025  
5,151.362,rs1042713,0.022  
5,151.451,rs1864932,0.005  
5,151.470,rs1181141,0.003  
5,151.508,rs11740851,0.001  
5,151.514,rs1029942,0.001  
5,151.669,rs17109268,0.005  
5,151.692,rs36077,0.006  
5,151.862,rs9325132,0.011  
5,151.968,rs748066,0.015  
5,151.983,rs2289285,0.016  
5,151.999,rs6887404,0.018  
5,152.031,rs352360,0.012  
5,152.063,rs352338,0.014  
5,152.078,rs10079672,0.015  
5,152.096,rs352336,0.017  
5,152.184,rs353282,0.019  
5,152.202,rs10515627,0.034  
5,152.206,rs6887452,0.035  
5,152.220,rs353286,0.040  
5,152.259,rs403084,0.024  
5,152.277,rs4705073,0.024  
5,152.403,rs7719315,0.017  
5,152.507,rs2400891,0.019  
5,152.592,rs728837,0.020  
5,152.733,rs11746690,0.018  
5,152.758,rs6579757,0.017  
5,152.788,rs4705382,0.016  
5,152.823,rs32581,0.017  
5,152.860,rs25846,0.017  
5,152.870,rs30884,0.018  
5,152.885,rs6864267,0.019



5,153.017,rs245057,0.022  
5,153.104,rs17655812,0.028  
5,153.246,rs2569075,0.030  
5,153.251,rs1986027,0.030  
5,153.458,rs740750,0.028  
5,153.686,rs2240784,0.021  
5,153.687,rs13360134,0.021  
5,153.708,rs2240785,0.020  
5,153.739,rs2240795,0.021  
5,153.822,rs919741,0.023  
5,153.840,rs6869180,0.023  
5,153.922,rs4958445,0.013  
5,153.970,rs874083,0.014  
5,154.026,rs919740,0.014  
5,154.106,rs891943,0.015  
5,154.155,rs891942,0.016  
5,154.201,rs6579788,0.009  
5,154.397,rs2748220,0.008  
5,154.483,rs2288817,0.012  
5,154.539,rs2569103,0.015  
5,154.703,rs2983102,0.013  
5,154.755,rs10061076,0.014  
5,155.371,rs33409,0.034  
5,155.677,rs2112637,0.027  
5,156.106,rs2054440,0.033  
5,156.147,rs8177435,0.021  
5,156.207,rs871269,0.013  
5,156.285,rs3762999,0.013  
5,156.309,rs1465415,0.014  
5,156.316,rs6896621,0.015  
5,156.331,rs7724949,0.015  
5,156.337,rs12651780,0.016  
5,156.358,rs2303025,0.008  
5,156.368,rs17728511,0.008  
5,156.379,rs9324677,0.007  
5,156.446,rs6897630,0.003  
5,156.477,rs7717659,0.001  
5,156.484,rs12518395,0.002  
5,156.490,rs248426,0.005  
5,156.525,rs248457,0.002  
5,156.551,rs979455,0.003  
5,156.637,rs152266,0.004  
5,156.662,rs9324686,0.007  
5,156.676,rs153445,0.008  
5,156.678,rs7717132,0.008  
5,156.704,rs12520516,0.005  
5,156.841,rs1508770,-0.000  
5,157.054,rs4958272,-0.020  
5,157.063,rs11954054,-0.021  
5,157.083,rs357616,-0.022  
5,157.173,rs11750722,-0.022  
5,157.298,rs1432862,-0.021  
5,157.344,rs1368369,-0.031  
5,157.352,rs2278383,-0.028  
5,157.407,rs7706276,-0.017  
5,157.437,rs1036196,-0.014  
5,157.554,rs1545030,-0.000  
5,157.617,rs2011050,-0.000  
5,157.984,rs890832,0.001  
5,158.103,rs170020,0.002  
5,158.109,rs159922,0.002

5,158.243,rs154689,0.005  
5,158.276,rs294958,0.005  
5,158.315,rs1422927,0.005  
5,158.409,rs2016865,0.006  
5,158.449,rs9324747,0.001  
5,158.472,rs160063,0.001  
5,158.502,rs2927585,0.000  
5,158.506,rs1871164,0.000  
5,158.643,rs509555,-0.000  
5,158.693,rs1353090,-0.000  
5,158.694,rs17114771,-0.000  
5,158.718,rs10515691,-0.000  
5,158.775,rs12658202,0.001  
5,158.813,rs1422884,0.000  
5,158.835,rs729329,-0.000  
5,158.892,rs13359392,-0.000  
5,159.113,rs1461234,-0.000  
5,159.141,rs2614125,-0.000  
5,159.210,rs286969,-0.000  
5,159.460,rs815611,0.001  
5,159.506,rs153417,0.000  
5,159.511,rs7711600,0.000  
5,159.515,rs3886611,0.000  
5,159.535,rs12520590,-0.000  
5,159.543,rs2161343,-0.000  
5,159.547,rs11745714,-0.000  
5,159.557,rs7244,-0.000  
5,159.565,rs10037670,-0.000  
5,159.601,rs6580083,-0.000  
5,159.606,rs283438,-0.000  
5,159.609,rs1842226,-0.001  
5,159.612,rs922535,-0.001  
5,159.618,rs6861375,-0.001  
5,159.621,rs283433,-0.001  
5,159.629,rs7703330,-0.001  
5,159.665,rs13184629,-0.000  
5,159.673,rs1824936,-0.000  
5,159.709,rs4958756,-0.002  
5,159.785,rs17615383,-0.002  
5,159.912,rs1390601,-0.001  
5,159.949,rs444984,-0.001  
5,159.956,rs1319694,-0.000  
5,159.974,rs6897414,0.000  
5,159.987,rs7715630,0.000  
5,160.022,rs1864125,-0.000  
5,160.037,rs2062400,-0.000  
5,160.057,rs12655293,-0.000  
5,160.070,rs4958401,-0.003  
5,160.112,rs245568,-0.005  
5,160.188,rs448373,-0.005  
5,160.286,rs4547967,-0.002  
5,160.315,rs4958416,-0.001  
5,160.329,rs1862147,-0.001  
5,160.334,rs11954814,-0.001  
5,160.534,rs244972,-0.017  
5,160.584,rs6894361,-0.019  
5,160.591,rs6556145,-0.019  
5,160.612,rs2310879,-0.019  
5,160.624,rs735331,-0.015  
5,160.661,rs3097811,-0.004  
5,160.679,rs6556352,-0.001

5,160.799,rs10075720,0.000  
5,160.934,rs187495,0.000  
5,160.955,rs6866397,0.000  
5,160.959,rs10068407,0.000  
5,161.060,rs7717533,0.002  
5,161.126,rs157571,0.003  
5,161.377,rs2279804,0.004  
5,161.394,rs11134551,0.003  
5,161.472,rs2436384,0.004  
5,161.476,rs163433,0.004  
5,161.491,rs3846684,0.003  
5,161.492,rs2288502,0.003  
5,161.525,rs727588,0.002  
5,161.647,rs4704863,0.007  
5,161.754,rs10063242,0.007  
5,161.810,rs10045580,0.011  
5,161.835,rs2270820,0.013  
5,161.860,rs4704896,0.012  
5,161.873,rs254682,0.011  
5,161.930,rs10052561,0.038  
5,161.934,rs1145608,0.047  
5,161.939,rs1952663,0.045  
5,161.941,rs2773218,0.044  
5,161.942,rs10515763,0.044  
5,161.944,rs10045385,0.042  
5,161.951,rs11135035,0.037  
5,161.963,rs972341,0.030  
5,161.966,rs824854,0.030  
5,161.972,rs7707243,0.028  
5,161.973,rs17056109,0.027  
5,162.070,rs1368298,0.021  
5,162.374,rs10066782,0.007  
5,162.386,rs4244439,0.008  
5,162.412,rs13174549,0.013  
5,162.430,rs929779,0.017  
5,162.435,rs270661,0.018  
5,162.798,rs2546890,0.003  
5,162.949,rs17056747,0.002  
5,162.981,rs10060059,0.002  
5,162.989,rs1422882,0.002  
5,163.019,rs6882695,0.002  
5,163.023,rs17056764,0.002  
5,163.067,rs10515794,0.000  
5,163.123,rs11959288,-0.001  
5,163.211,rs6895787,-0.013  
5,163.387,rs11135072,-0.024  
5,163.420,rs12652868,-0.023  
5,163.462,rs1363659,-0.022  
5,163.555,rs1422847,-0.028  
5,163.583,rs365804,-0.028  
5,163.722,rs6881745,-0.031  
5,163.748,rs752438,-0.031  
5,163.758,rs31689,-0.031  
5,163.840,rs1025466,-0.024  
5,163.889,rs6892282,-0.026  
5,163.902,rs7718362,-0.026  
5,163.944,rs952037,-0.020  
5,163.973,rs10053468,-0.022  
5,164.407,rs918480,-0.016  
5,164.443,rs2277955,-0.016  
5,164.494,rs10064968,-0.015

5,164.532,rs2303059,-0.014  
5,164.543,rs6899125,-0.014  
5,164.663,rs13185269,-0.013  
5,164.677,rs2961923,-0.013  
5,164.728,rs2961944,-0.013  
5,164.752,rs2909733,-0.009  
5,164.753,rs2431099,-0.009  
5,164.755,rs2431097,-0.008  
5,164.783,rs1592752,-0.004  
5,164.786,rs12654902,-0.004  
5,164.792,rs6897982,-0.003  
5,164.796,rs7717590,-0.003  
5,164.881,rs10062528,-0.003  
5,164.912,rs17058295,-0.004  
5,164.914,rs6862853,-0.004  
5,164.939,rs17058343,-0.006  
5,164.967,rs1516651,-0.009  
5,164.981,rs10051325,-0.010  
5,164.996,rs1516655,-0.013  
5,165.045,rs10053266,-0.018  
5,165.047,rs6861122,-0.018  
5,165.083,rs624722,-0.022  
5,165.174,rs11949658,-0.030  
5,165.254,rs2964773,-0.041  
5,165.285,rs4426954,-0.058  
5,165.333,rs11956866,-0.062  
5,165.343,rs6888242,-0.063  
5,165.482,rs9784608,-0.059  
5,165.552,rs17052610,-0.045  
5,165.652,rs2422102,-0.041  
5,165.666,rs209333,-0.042  
5,165.699,rs209353,-0.043  
5,165.778,rs399588,-0.050  
5,165.793,rs10491327,-0.051  
5,165.813,rs7720600,-0.054  
5,165.822,rs6879659,-0.055  
5,165.862,rs4601080,-0.056  
5,165.905,rs6863169,-0.084  
5,165.939,rs4244436,-0.109  
5,165.989,rs10042997,-0.135  
5,166.115,rs7711337,-0.172  
5,166.127,rs699096,-0.175  
5,166.182,rs3914991,-0.212  
5,166.259,rs7731154,-0.213  
5,166.382,rs828718,-0.211  
5,166.826,rs4074952,-0.211  
5,167.077,rs17061325,-0.213  
5,167.098,rs2913556,-0.216  
5,167.151,rs214115,-0.223  
5,167.224,rs13159031,-0.229  
5,167.251,rs182462,-0.233  
5,167.290,rs300211,-0.257  
5,167.343,rs410056,-0.299  
5,167.448,rs1946198,-0.316  
5,167.891,rs6893586,-0.372  
5,167.937,rs6875996,-0.399  
5,167.996,rs7447133,-0.430  
5,168.203,rs4868871,-0.447  
5,168.215,rs10042643,-0.448  
5,168.518,rs1030674,-0.467  
5,168.557,rs4357056,-0.451

5,168.564,rs17287615,-0.448  
5,168.577,rs4563644,-0.391  
5,168.646,rs4868875,-0.274  
5,168.667,rs3923169,-0.278  
5,168.767,rs11135312,-0.238  
5,168.850,rs13164902,-0.207  
5,169.121,rs10043454,-0.213  
5,169.188,rs4421125,-0.222  
5,169.224,rs7734804,-0.229  
5,169.333,rs7735043,-0.250  
5,169.440,rs1433001,-0.280  
5,169.524,rs1422686,-0.308  
5,169.542,rs3980160,-0.313  
5,169.568,rs10476513,-0.326  
5,169.617,rs2246518,-0.358  
5,169.647,rs11135373,-0.376  
5,169.676,rs9314075,-0.386  
5,169.718,rs1159244,-0.409  
5,169.839,rs1030154,-0.462  
5,169.841,rs10515901,-0.462  
5,169.881,rs262761,-0.462  
5,169.910,rs116953,-0.464  
5,170.007,rs262741,-0.475  
5,170.236,rs248274,-0.427  
5,170.327,rs26438,-0.423  
5,170.335,rs32720,-0.470  
5,170.367,rs26435,-0.522  
5,170.368,rs10475761,-0.522  
5,170.378,rs396769,-0.532  
5,170.427,rs26445,-0.557  
5,170.448,rs6873292,-0.568  
5,170.660,rs31736,-0.646  
5,170.670,rs10515916,-0.646  
5,170.724,rs17066274,-0.645  
5,170.929,rs830664,-0.606  
5,170.985,rs830678,-0.609  
5,171.051,rs2055354,-0.602  
5,171.155,rs2650084,-0.541  
5,171.226,rs13361834,-0.531  
5,171.325,rs1799550,-0.527  
5,171.397,rs350921,-0.532  
5,171.426,rs17066814,-0.534  
5,171.647,rs2961854,-0.545  
5,171.649,rs10516015,-0.545  
5,171.961,rs1349687,-0.579  
5,172.112,rs6555706,-0.548  
5,172.182,rs1422821,-0.537  
5,172.343,rs1432927,-0.571  
5,172.368,rs13157204,-0.576  
5,172.418,rs2161425,-0.562  
5,172.469,rs4145651,-0.580  
5,172.492,rs2161424,-0.590  
5,172.535,rs12520749,-0.607  
5,172.586,rs10072558,-0.594  
5,172.635,rs39956,-0.584  
5,172.641,rs3853242,-0.583  
5,172.695,rs1027635,-0.587  
5,173.151,rs7703323,-0.616  
5,173.204,rs10462888,-0.608  
5,173.428,rs7700378,-0.579  
5,173.459,rs7731005,-0.575

5,173.573,rs4868792,-0.580  
5,173.657,rs6883599,-0.577  
5,173.679,rs11739983,-0.576  
5,173.710,rs9313375,-0.531  
5,173.903,rs13156620,-0.657  
5,174.029,rs1025482,-0.733  
5,174.159,rs1025481,-0.742  
5,174.212,rs7715770,-0.754  
5,174.295,rs13153563,-0.773  
5,174.302,rs12515062,-0.785  
5,174.328,rs17068796,-0.829  
5,174.399,rs2336899,-0.950  
5,174.407,rs279389,-0.948  
5,174.533,rs279403,-0.908  
5,174.791,rs1477284,-0.913  
5,174.907,rs39950,-0.875  
5,174.987,rs1422931,-0.961  
5,174.995,rs2617984,-0.961  
5,175.127,rs247995,-1.005  
5,175.140,rs247999,-1.008  
5,175.145,rs6555782,-1.006  
5,175.159,rs248003,-0.998  
5,175.257,rs1077046,-0.945  
5,175.355,rs1036193,-0.905  
5,175.393,rs4976582,-0.889  
5,175.473,rs4976585,-0.917  
5,175.476,rs3733985,-0.920  
5,175.515,rs1960425,-0.907  
5,175.576,rs11748886,-0.887  
5,175.650,rs2112556,-0.862  
5,175.670,rs11949188,-0.847  
5,175.704,rs17731499,-0.883  
5,175.788,rs4976598,-0.845  
5,175.800,rs4320284,-0.843  
5,175.829,rs6555807,-0.829  
5,175.881,rs4976606,-0.757  
5,175.897,rs4976608,-0.753  
5,175.927,rs1009069,-0.744  
5,176.252,rs158910,-0.661  
5,176.277,rs10052805,-0.670  
5,176.321,rs12519740,-0.686  
5,176.520,rs6890724,-0.745  
5,176.527,rs7728435,-0.747  
5,176.553,rs10036727,-0.728  
5,176.568,rs11742226,-0.724  
5,176.593,rs4867902,-0.749  
5,176.600,rs17733068,-0.775  
5,176.626,rs4298263,-0.870  
5,176.642,rs4867939,-0.904  
5,176.660,rs17070509,-0.917  
5,176.701,rs12691283,-0.919  
5,176.828,rs6555833,-0.915  
5,176.842,rs17635646,-0.942  
5,176.898,rs1466947,-0.946  
5,176.936,rs2938772,-0.992  
5,176.994,rs11134544,-0.979  
5,177.000,rs7714853,-0.975  
5,177.126,rs1432910,-0.887  
5,177.150,rs9313435,-0.881  
5,177.358,rs11747642,-0.818  
5,177.563,rs6890327,-0.811

5,177.607,rs10516055,-0.808  
5,177.888,rs10054190,-0.792  
5,177.910,rs296006,-0.791  
5,177.928,rs10067964,-0.794  
5,177.939,rs295996,-0.798  
5,177.977,rs188431,-0.776  
5,177.989,rs10071654,-0.772  
5,177.992,rs12654605,-0.773  
5,178.029,rs4868327,-0.786  
5,178.084,rs12515660,-0.802  
5,178.123,rs6867453,-0.800  
5,178.171,rs10038332,-0.780  
5,178.179,rs1421764,-0.729  
5,178.196,rs11134564,-0.731  
5,178.272,rs6883683,-0.740  
5,178.314,rs1001869,-0.743  
5,178.406,rs17071195,-0.713  
5,178.440,rs6898594,-0.768  
5,178.445,rs731398,-0.770  
5,178.539,rs255740,-0.803  
5,178.725,rs17668965,-0.790  
5,178.806,rs169082,-0.782  
5,178.842,rs7713640,-0.801  
5,178.876,rs3734099,-0.814  
5,179.078,rs9313473,-0.913  
5,179.250,rs261625,-0.923  
5,179.277,rs17646113,-0.906  
5,179.418,rs6879439,-0.821  
5,179.574,rs10475927,-0.720  
5,179.578,rs17071888,-0.721  
5,179.587,rs259903,-0.722  
5,179.661,rs1422692,-0.741  
5,179.723,rs1363576,-0.755  
5,179.729,rs6893165,-0.758  
5,179.862,rs4867922,-0.757  
5,180.071,rs4634366,-0.713  
5,180.223,rs2287744,-0.657  
5,180.257,rs10044209,-0.657  
5,180.361,rs11743438,-0.596  
5,180.436,rs17072371,-0.593  
5,180.574,rs315717,-0.588  
5,180.633,rs315751,-0.588  
5,180.733,rs315721,-0.527  
5,180.764,rs17072430,-0.522  
5,180.791,rs3761749,-0.517  
5,180.845,rs315791,-0.493  
5,180.886,rs315796,-0.485  
5,181.002,rs7725699,-0.464  
5,181.214,rs314155,-0.431  
5,181.260,rs314111,-0.449  
5,181.275,rs827778,-0.443  
5,181.300,rs9313503,-0.432  
5,181.334,rs314137,-0.431  
5,181.533,rs13156152,-0.395  
5,181.576,rs6877607,-0.397  
5,181.612,rs959461,-0.408  
5,181.799,rs10039039,-0.404  
5,181.837,rs6878302,-0.399  
5,181.857,rs1035414,-0.397  
5,181.871,rs1978440,-0.395  
5,181.903,rs933656,-0.348

5,181.937,rs10475944,-0.342  
5,182.027,rs6555903,-0.326  
5,182.157,rs9313511,-0.293  
5,182.483,rs1875978,-0.311  
5,182.532,rs905823,-0.311  
5,182.728,rs12189366,-0.308  
5,182.736,rs10475947,-0.308  
5,182.763,rs11747249,-0.308  
5,182.783,rs4868012,-0.303  
5,182.802,rs6897199,-0.275  
5,182.815,rs2202440,-0.300  
5,182.885,rs7701794,-0.290  
5,182.893,rs12514867,-0.271  
5,182.922,rs732157,-0.320  
5,183.314,rs10516077,-0.334  
5,183.398,rs10074614,-0.325  
5,183.538,rs6555940,-0.304  
5,183.573,rs17680768,-0.298  
5,183.599,rs17748299,-0.293  
5,183.637,rs4559013,-0.286  
5,183.690,rs3097846,-0.259  
5,183.691,rs1545033,-0.260  
5,183.702,rs11745375,-0.263  
5,183.706,rs4868093,-0.285  
5,183.710,rs3097838,-0.277  
5,183.720,rs891971,-0.272  
5,183.749,rs891981,-0.260  
5,183.763,rs891980,-0.258  
5,183.773,rs11134701,-0.256  
5,183.814,rs11134705,-0.222  
5,183.844,rs1382901,-0.187  
5,183.850,rs745443,-0.181  
5,183.859,rs10039848,-0.178  
5,183.863,rs257363,-0.178  
5,183.881,rs7708413,-0.177  
5,183.882,rs10516086,-0.176  
5,183.908,rs26408,-0.174  
5,183.915,rs6879367,-0.182  
5,183.919,rs931117,-0.186  
5,183.921,rs33874,-0.187  
5,183.923,rs11134715,-0.188  
5,183.944,rs11134717,-0.186  
5,183.978,rs171718,-0.179  
5,184.096,rs153741,-0.162  
5,184.098,rs249516,-0.162  
5,184.202,rs10463010,-0.151  
5,184.218,rs7712491,-0.152  
5,184.226,rs17074035,-0.154  
5,184.250,rs1529702,-0.161  
5,184.280,rs702097,-0.172  
5,184.879,rs10035578,-0.140  
5,184.927,rs3812023,-0.127  
5,184.983,rs11741056,-0.149  
5,185.084,rs3111491,-0.157  
5,185.175,rs3776754,-0.158  
5,185.276,rs2172048,-0.185  
5,185.339,rs17074413,-0.180  
5,185.407,rs6876038,-0.174  
5,185.693,rs7715800,-0.165  
5,185.924,rs2731729,-0.146  
5,185.991,rs10077377,-0.146



5,186.124,rs6865951,-0.146  
5,186.143,rs2569248,-0.146  
5,186.185,rs10042482,-0.114  
5,186.258,rs11745941,-0.092  
5,186.394,rs1541918,-0.091  
5,186.410,rs7442753,-0.090  
5,186.460,rs10059684,-0.085  
5,186.505,rs10043108,-0.088  
5,186.521,rs714715,-0.089  
5,186.576,rs931802,-0.093  
5,186.592,rs4867681,-0.101  
5,186.613,rs3964610,-0.111  
5,186.701,rs7730108,-0.137  
5,186.764,rs10035202,-0.140  
5,186.806,rs1027745,-0.150  
5,186.903,rs172860,-0.168  
5,187.021,rs2161375,-0.156  
5,187.184,rs10057387,-0.179  
5,187.189,rs6877686,-0.178  
5,187.245,rs6870663,-0.181  
5,187.300,rs751988,-0.208  
5,187.353,rs13186108,-0.272  
5,187.379,rs4868226,-0.264  
5,187.443,rs498221,-0.291  
5,187.472,rs472959,-0.286  
5,187.536,rs481221,-0.283  
5,187.552,rs485710,-0.281  
5,187.714,rs2004997,-0.275  
5,187.735,rs6895379,-0.243  
5,187.916,rs7719172,-0.228  
5,187.964,rs10054054,-0.226  
5,188.284,rs3805463,-0.213  
5,188.350,rs255313,-0.211  
5,188.496,rs703752,-0.238  
5,188.543,rs6873973,-0.278  
5,188.555,rs4867697,-0.410  
5,188.556,rs10476070,-0.421  
5,188.561,rs10072402,-0.401  
5,188.565,rs6884482,-0.385  
5,188.592,rs3132145,-0.407  
5,188.697,rs10073580,-0.365  
5,188.730,rs874719,-0.385  
5,188.762,rs3756530,-0.403  
5,188.771,rs4868257,-0.410  
5,188.786,rs3797456,-0.418  
5,188.821,rs7730758,-0.437  
5,188.840,rs921004,-0.439  
5,188.921,rs1000939,-0.427  
5,188.940,rs6884147,-0.422  
5,189.121,rs6878606,-0.352  
5,189.139,rs2112618,-0.351  
5,189.238,rs750168,-0.349  
5,189.404,rs10076027,-0.286  
5,189.415,rs11954373,-0.286  
5,189.550,rs17076110,-0.288  
5,189.570,rs746214,-0.288  
5,190.361,rs703724,-0.290  
5,190.441,rs10074473,-0.297  
5,190.540,rs10064888,-0.315  
5,190.750,rs791385,-0.255  
5,190.769,rs17076407,-0.269

5,190.784,rs13164950,-0.291  
5,190.805,rs16821,-0.330  
5,190.806,rs9313655,-0.331  
5,190.826,rs791371,-0.348  
5,190.869,rs2659186,-0.372  
5,190.901,rs359457,-0.365  
5,191.048,rs6875935,-0.336  
5,191.082,rs11744584,-0.338  
5,191.086,rs7703555,-0.339  
5,191.636,rs11739519,-0.347  
5,191.684,rs7712944,-0.348  
5,191.694,rs2546999,-0.348  
5,191.868,rs10516111,-0.407  
5,191.912,rs871503,-0.408  
5,191.999,rs7705993,-0.393  
5,192.011,rs7711162,-0.388  
5,192.047,rs11952072,-0.381  
5,192.278,rs2082381,-0.300  
5,192.445,rs6894337,-0.249  
5,192.470,rs2936995,-0.246  
5,192.535,rs2937000,-0.256  
5,192.554,rs2964083,-0.259  
5,192.599,rs2162728,-0.233  
5,192.637,rs753829,-0.269  
5,192.678,rs962880,-0.258  
5,192.686,rs1875190,-0.255  
5,192.719,rs2909716,-0.242  
5,192.835,rs11134841,-0.224  
5,192.865,rs890755,-0.218  
5,192.974,rs703739,-0.182  
5,193.040,rs10516124,-0.177  
5,193.075,rs7725112,-0.180  
5,193.091,rs12516352,-0.182  
5,193.104,rs13179274,-0.183  
5,193.131,rs12515393,-0.178  
5,193.226,rs4868438,-0.164  
5,193.260,rs13170111,-0.178  
5,193.379,rs4868442,-0.239  
5,193.400,rs7733337,-0.243  
5,193.445,rs1125813,-0.246  
5,193.566,rs6871270,-0.186  
5,193.613,rs6556165,-0.182  
5,193.741,rs2431160,-0.145  
5,193.818,rs17798338,-0.193  
5,193.827,rs10038452,-0.201  
5,193.866,rs4868473,-0.227  
5,193.905,rs10052925,-0.254  
5,193.911,rs1862158,-0.257  
5,193.913,rs10516123,-0.251  
5,193.925,rs981359,-0.217  
5,193.941,rs12522449,-0.200  
5,193.984,rs2135053,-0.179  
5,193.994,rs10072136,-0.155  
5,194.005,rs10214323,-0.169  
5,194.007,rs11953826,-0.171  
5,194.031,rs6894193,-0.150  
5,194.081,rs949637,-0.139  
5,194.135,rs6871049,-0.119  
5,194.219,rs750494,-0.084  
5,194.260,rs695221,-0.072  
5,194.282,rs6863550,-0.075

5,194.334,rs1422919,-0.093  
5,194.339,rs6898421,-0.095  
5,194.360,rs1549221,-0.075  
5,194.390,rs12657640,-0.072  
5,194.491,rs13185639,-0.060  
5,194.548,rs2471015,-0.054  
5,194.561,rs966775,-0.054  
5,194.568,rs4424010,-0.051  
5,194.604,rs4868517,-0.037  
5,194.650,rs2431135,-0.023  
5,194.702,rs265984,-0.027  
5,194.723,rs265993,-0.040  
5,194.739,rs266004,-0.042  
5,194.751,rs265974,-0.045  
5,194.813,rs1496133,-0.043  
5,194.862,rs267382,-0.038  
5,195.001,rs10044281,-0.043  
5,195.018,rs200461,-0.045  
5,195.024,rs2940479,-0.045  
5,195.076,rs870258,-0.065  
5,195.078,rs2913217,-0.064  
5,195.135,rs17572757,-0.022  
5,195.146,rs2937448,-0.018  
5,195.156,rs590774,-0.017  
5,195.201,rs6864183,-0.013  
5,195.266,rs13356830,-0.016  
5,195.415,rs2382072,-0.031  
5,195.417,rs4868534,-0.031  
5,195.524,rs1560036,-0.028  
5,195.617,rs4867809,-0.035  
5,196.205,rs2334965,-0.053  
5,196.568,rs10214381,-0.039  
5,196.855,rs4868644,-0.033  
5,197.091,rs11134988,-0.031  
5,197.148,rs4868689,-0.031  
5,197.170,rs1487802,-0.031  
5,197.216,rs9686813,-0.027  
5,197.264,rs4867858,-0.033  
5,197.299,rs2962783,-0.037  
5,197.453,rs692825,-0.088  
5,197.553,rs3736432,-0.118  
5,197.559,rs4976661,-0.118  
5,197.570,rs691057,-0.120  
5,197.691,rs365132,-0.112  
5,197.948,rs451643,-0.111  
5,198.355,rs3088050,-0.096  
5,198.377,rs6885410,-0.095  
5,198.442,rs4075958,-0.093  
5,198.593,rs2544809,-0.085  
5,198.827,rs13169820,-0.076  
5,198.835,rs7727897,-0.075  
5,199.154,rs4958955,-0.050  
5,199.350,rs4292462,-0.045  
5,199.356,rs6896573,-0.050  
5,199.365,rs9329125,-0.057  
5,199.397,rs4072924,-0.054  
5,199.501,rs10066995,-0.063  
5,199.534,rs12515321,-0.062  
5,199.553,rs4380683,-0.063  
5,199.574,rs6881402,-0.063  
5,199.840,rs17080239,-0.046

5,199.907,rs7733159,-0.042  
5,199.939,rs1059367,-0.044  
5,199.942,rs2913751,-0.044  
5,199.945,rs2913750,-0.044  
5,200.029,rs1544926,-0.058  
5,200.278,rs11745722,-0.071  
5,200.299,rs11958296,-0.087  
5,200.300,rs930054,-0.088  
5,200.444,rs13178731,-0.068  
5,200.453,rs2973737,-0.067  
5,200.824,rs489777,-0.080  
5,200.843,rs4976733,-0.080  
5,200.850,rs535858,-0.081  
5,201.013,rs775700,-0.130  
5,201.109,rs4413550,-0.151  
5,201.141,rs12523265,-0.154  
5,201.258,rs12522503,-0.144  
5,201.276,rs6898275,-0.142  
5,201.403,rs7710807,-0.119  
5,201.422,rs11949276,-0.120  
5,201.468,rs10455076,-0.120  
5,201.607,rs13174784,-0.111  
5,201.614,rs6871932,-0.111  
5,201.622,rs7708351,-0.112  
5,201.689,rs6870926,-0.112  
5,201.764,rs953741,-0.113  
5,201.850,rs13362387,-0.119  
5,202.006,rs2078183,-0.126  
5,202.332,rs6860046,-0.139  
5,202.382,rs11746863,-0.145  
5,202.443,rs7735461,-0.155  
5,202.465,rs6862563,-0.159  
5,202.491,rs252070,-0.145  
5,202.499,rs9329070,-0.138  
5,202.515,rs2279979,-0.124  
5,202.528,rs11746118,-0.121  
5,202.536,rs252064,-0.121  
5,202.542,rs398829,-0.139  
5,202.562,rs464156,-0.122  
5,202.605,rs456909,-0.110  
5,202.615,rs469568,-0.110  
5,202.705,rs901253,-0.108  
5,202.762,rs166031,-0.116  
5,202.804,rs878932,-0.113  
5,202.837,rs422172,-0.139  
5,202.914,rs255022,-0.126  
5,202.997,rs555864,-0.113  
5,203.032,rs7731436,-0.107  
5,203.112,rs11249626,-0.114  
5,203.127,rs4701113,-0.112  
5,203.226,rs7726821,-0.148  
5,203.258,rs7735038,-0.163  
5,203.274,rs11249631,-0.168  
5,203.312,rs9329079,-0.149  
5,203.409,rs7733389,-0.131  
5,203.540,rs4701137,-0.138  
5,203.713,rs4331859,-0.158  
5,203.833,rs10516146,-0.163  
5,204.001,rs30386,-0.172  
5,204.106,rs17616317,-0.202  
5,204.137,rs2162760,-0.212

5,204.143,rs248221,-0.214  
5,204.150,rs17079868,-0.214  
5,204.333,rs4282280,-0.230  
5,204.345,rs10061906,-0.295  
5,204.370,rs4624755,-0.297  
5,204.419,rs4700718,-0.307  
5,204.446,rs1867457,-0.326  
5,204.454,rs11749727,-0.334  
5,204.461,rs4367258,-0.340  
5,204.479,rs4700914,-0.358  
5,204.577,rs4362908,-0.334  
5,204.591,rs11249687,-0.325  
5,204.689,rs729652,-0.270  
5,204.722,rs7707082,-0.276  
5,204.789,rs10041598,-0.285  
5,204.802,rs918481,-0.286  
5,204.824,rs7712252,-0.299  
5,204.856,rs7733582,-0.319  
5,204.875,rs9329110,-0.331  
5,204.967,rs6893735,-0.320  
5,204.975,rs6886960,-0.312  
5,205.110,rs10059433,-0.256  
5,205.210,rs11957360,-0.217  
5,205.265,rs400330,-0.195  
5,205.283,rs3797104,-0.189  
5,205.307,rs4700745,-0.183  
5,205.328,rs307805,-0.170  
5,205.396,rs11249743,-0.138  
5,205.484,rs10479581,-0.138  
5,205.485,rs17080555,-0.139  
5,205.580,rs7726005,-0.171  
5,205.593,rs655601,-0.169  
5,205.627,rs1872183,-0.159  
5,205.698,rs2619756,-0.185  
5,205.999,rs11249756,-0.259  
5,206.070,rs1579303,-0.241  
5,206.083,rs7379313,-0.238  
5,206.094,rs13167249,-0.239  
5,206.105,rs13358985,-0.243  
5,206.152,rs7379517,-0.255  
5,206.176,rs1363537,-0.261  
5,206.226,rs7380309,-0.256  
5,206.282,rs1592937,-0.297  
5,206.418,rs1279912,-0.284  
6,0.005,rs2788245,-0.029  
6,0.071,rs9392857,-0.025  
6,0.233,rs9505192,-0.031  
6,0.657,rs11753072,-0.016  
6,0.679,rs11754896,-0.017  
6,0.750,rs12207278,-0.022  
6,0.782,rs6922858,-0.024  
6,0.792,rs9393002,-0.024  
6,0.796,rs2756318,-0.024  
6,0.945,rs9379231,-0.025  
6,0.977,rs9505514,-0.024  
6,1.165,rs723106,-0.023  
6,1.518,rs10793858,-0.021  
6,1.550,rs845880,-0.021  
6,1.701,rs6925338,-0.029  
6,1.739,rs9505667,-0.042  
6,1.742,rs11966212,-0.056

6,1.885,rs7747742,-0.057  
6,1.998,rs2050158,-0.066  
6,2.085,rs1997773,-0.080  
6,2.247,rs9502839,-0.108  
6,2.279,rs7454978,-0.110  
6,2.508,rs9378280,-0.093  
6,2.520,rs164255,-0.093  
6,2.697,rs238035,-0.095  
6,2.728,rs12526976,-0.096  
6,2.844,rs238074,-0.084  
6,2.891,rs2008503,-0.094  
6,2.937,rs2459602,-0.100  
6,3.041,rs1437282,-0.084  
6,3.113,rs6596805,-0.089  
6,3.338,rs7739076,-0.060  
6,3.427,rs9392279,-0.080  
6,3.533,rs1737753,-0.106  
6,3.638,rs1878475,-0.123  
6,3.741,rs746095,-0.126  
6,3.870,rs1737786,-0.113  
6,4.010,rs932410,-0.107  
6,4.172,rs6927891,-0.099  
6,4.265,rs4146690,-0.096  
6,4.312,rs10900909,-0.073  
6,4.324,rs7763653,-0.073  
6,4.342,rs9392301,-0.075  
6,4.459,rs2569865,-0.101  
6,4.466,rs6937266,-0.101  
6,4.563,rs2317966,-0.100  
6,4.640,rs2816221,-0.094  
6,4.644,rs910016,-0.097  
6,4.648,rs7772118,-0.105  
6,4.662,rs742554,-0.100  
6,4.678,rs2249437,-0.105  
6,4.686,rs2745580,-0.084  
6,4.699,rs2745593,-0.097  
6,4.710,rs2235718,-0.089  
6,4.759,rs2012025,-0.093  
6,4.919,rs4461777,-0.082  
6,4.941,rs11968464,-0.083  
6,4.968,rs9503013,-0.083  
6,4.972,rs9405506,-0.083  
6,4.972,rs12197419,-0.083  
6,5.016,rs9378310,-0.103  
6,5.040,rs12189843,-0.109  
6,5.103,rs10484696,-0.121  
6,5.116,rs6926560,-0.124  
6,5.137,rs1040532,-0.138  
6,5.161,rs3823271,-0.131  
6,5.166,rs6919059,-0.129  
6,5.248,rs226468,-0.139  
6,5.270,rs1157673,-0.141  
6,5.272,rs6596856,-0.141  
6,5.292,rs3778533,-0.138  
6,5.296,rs3800086,-0.139  
6,5.360,rs3800101,-0.140  
6,5.484,rs3800128,-0.140  
6,5.694,rs10223785,-0.122  
6,5.695,rs7755470,-0.122  
6,5.757,rs6596867,-0.116  
6,6.041,rs7768483,-0.107

6,6.712,rs9503168,-0.102  
6,6.771,rs9501834,-0.108  
6,6.856,rs6940091,-0.116  
6,6.932,rs17135104,-0.126  
6,6.982,rs10046356,-0.128  
6,7.041,rs1994124,-0.126  
6,7.167,rs1680870,-0.148  
6,7.175,rs4959190,-0.147  
6,7.207,rs2794553,-0.140  
6,7.298,rs6918808,-0.128  
6,7.448,rs6904200,-0.115  
6,7.462,rs9378725,-0.115  
6,7.607,rs4246059,-0.096  
6,7.628,rs9503288,-0.094  
6,7.641,rs4382335,-0.092  
6,7.650,rs11759003,-0.091  
6,7.760,rs460677,-0.077  
6,7.870,rs316365,-0.078  
6,7.872,rs10793840,-0.078  
6,7.874,rs9503309,-0.087  
6,7.874,rs316364,-0.089  
6,7.875,rs316362,-0.111  
6,7.904,rs405616,-0.121  
6,8.018,rs318477,-0.167  
6,8.023,rs9392442,-0.160  
6,8.046,rs17135958,-0.138  
6,8.082,rs318497,-0.127  
6,8.090,rs7759176,-0.125  
6,8.146,rs4959217,-0.128  
6,8.232,rs7743193,-0.131  
6,8.285,rs1054132,-0.110  
6,8.411,rs1040521,-0.111  
6,8.504,rs2326173,-0.093  
6,8.579,rs10498658,-0.089  
6,8.797,rs4448134,-0.046  
6,8.844,rs9405622,-0.046  
6,8.918,rs9503480,-0.057  
6,8.955,rs6596957,-0.062  
6,8.992,rs13193012,-0.068  
6,9.076,rs4305775,-0.087  
6,9.116,rs9405629,-0.093  
6,9.127,rs9378784,-0.090  
6,9.191,rs6917161,-0.057  
6,9.224,rs1887843,-0.054  
6,9.349,rs9392489,-0.042  
6,9.366,rs4959824,-0.041  
6,9.371,rs10498662,-0.040  
6,9.453,rs6921583,-0.031  
6,9.568,rs748842,-0.014  
6,9.643,rs4959847,-0.016  
6,9.713,rs9503618,-0.019  
6,9.788,rs875085,-0.013  
6,9.790,rs878803,-0.013  
6,9.818,rs6902488,-0.015  
6,9.836,rs9503635,-0.015  
6,9.961,rs6904497,-0.025  
6,10.117,rs226930,-0.040  
6,10.149,rs9392005,-0.072  
6,10.236,rs12526106,-0.080  
6,10.334,rs12208688,-0.060  
6,10.418,rs9378385,-0.057

6,10.490,rs10498664,-0.048  
6,10.525,rs2496388,-0.046  
6,10.537,rs2490050,-0.046  
6,10.596,rs11242890,-0.037  
6,10.624,rs4959884,-0.041  
6,10.758,rs9405676,-0.041  
6,10.785,rs9502099,-0.055  
6,10.840,rs9392025,-0.059  
6,10.885,rs6597023,-0.072  
6,10.917,rs6938648,-0.079  
6,11.044,rs12198921,-0.113  
6,11.269,rs9503936,-0.123  
6,11.289,rs6935622,-0.124  
6,11.300,rs2025267,-0.125  
6,11.332,rs1999022,-0.161  
6,11.385,rs1887574,-0.191  
6,11.496,rs811226,-0.205  
6,11.563,rs4959949,-0.213  
6,11.591,rs168126,-0.213  
6,11.605,rs885185,-0.213  
6,11.610,rs9502175,-0.241  
6,11.868,rs1265235,-0.224  
6,12.002,rs403026,-0.244  
6,12.172,rs12206701,-0.341  
6,12.178,rs714112,-0.346  
6,12.268,rs9504181,-0.457  
6,12.278,rs393587,-0.467  
6,12.340,rs9504197,-0.433  
6,12.370,rs2875955,-0.426  
6,12.424,rs1849564,-0.438  
6,12.511,rs6920511,-0.445  
6,12.519,rs1040045,-0.407  
6,12.558,rs4502986,-0.425  
6,12.827,rs6926191,-0.486  
6,12.828,rs12198622,-0.486  
6,12.888,rs9504281,-0.499  
6,12.962,rs9405785,-0.514  
6,13.026,rs7738117,-0.506  
6,13.053,rs7768378,-0.508  
6,13.076,rs6907963,-0.510  
6,13.129,rs2764176,-0.516  
6,13.322,rs11964945,-0.533  
6,13.493,rs464681,-0.578  
6,13.601,rs6917225,-0.591  
6,13.606,rs2746242,-0.591  
6,13.656,rs10458086,-0.595  
6,13.990,rs6924717,-0.642  
6,13.995,rs9405818,-0.686  
6,14.141,rs797126,-0.737  
6,14.186,rs2432749,-0.706  
6,14.219,rs2432794,-0.726  
6,14.234,rs2432785,-0.732  
6,14.394,rs9405834,-0.797  
6,14.401,rs9405270,-0.799  
6,14.421,rs2503800,-0.799  
6,14.433,rs760612,-0.805  
6,14.440,rs433295,-0.808  
6,14.458,rs2503801,-0.871  
6,14.459,rs191833,-0.813  
6,14.483,rs574716,-0.826  
6,14.569,rs9405273,-0.827



6,14.624,rs2326613,-0.837  
6,14.640,rs6937827,-0.832  
6,14.665,rs7746509,-0.839  
6,14.694,rs17140870,-0.845  
6,14.788,rs941427,-0.823  
6,14.798,rs2018284,-0.818  
6,14.868,rs12525101,-0.813  
6,14.904,rs9328324,-0.865  
6,14.917,rs765878,-0.866  
6,15.019,rs12215495,-0.840  
6,15.065,rs1977058,-0.829  
6,15.094,rs7741438,-0.802  
6,15.180,rs7766672,-0.721  
6,15.273,rs582186,-0.583  
6,15.297,rs4960155,-0.547  
6,15.321,rs667875,-0.541  
6,15.462,rs1905214,-0.460  
6,15.497,rs17141697,-0.454  
6,15.631,rs7772158,-0.415  
6,15.691,rs6911594,-0.374  
6,15.698,rs440330,-0.373  
6,15.724,rs407447,-0.369  
6,15.725,rs11969912,-0.369  
6,15.727,rs3778354,-0.367  
6,15.802,rs2085575,-0.264  
6,15.909,rs1267843,-0.214  
6,16.005,rs9502429,-0.261  
6,16.030,rs9504743,-0.256  
6,16.076,rs2755416,-0.292  
6,16.089,rs11243078,-0.274  
6,16.128,rs1318606,-0.222  
6,16.223,rs1902946,-0.175  
6,16.305,rs9328361,-0.152  
6,16.332,rs4455715,-0.149  
6,16.440,rs1761928,-0.139  
6,16.449,rs7772062,-0.139  
6,16.499,rs11963226,-0.134  
6,16.591,rs6929885,-0.125  
6,16.620,rs6919894,-0.123  
6,16.656,rs849057,-0.122  
6,16.877,rs9504848,-0.125  
6,16.971,rs9328376,-0.127  
6,16.979,rs9328377,-0.127  
6,17.052,rs2294461,-0.140  
6,17.078,rs3804474,-0.144  
6,17.098,rs17142392,-0.142  
6,17.112,rs7739053,-0.141  
6,17.201,rs760893,-0.133  
6,17.238,rs201016,-0.136  
6,17.292,rs3761986,-0.135  
6,17.407,rs201039,-0.102  
6,17.444,rs201053,-0.092  
6,17.526,rs1294433,-0.112  
6,17.586,rs2876028,-0.111  
6,17.689,rs1892462,-0.099  
6,17.748,rs6927306,-0.097  
6,17.790,rs4530912,-0.087  
6,17.849,rs13215298,-0.076  
6,17.884,rs1286037,-0.059  
6,18.014,rs1887510,-0.055  
6,18.029,rs2182802,-0.052

6,18.134,rs6908529,-0.012  
6,18.154,rs2768999,-0.011  
6,18.221,rs2768990,-0.019  
6,18.255,rs2765353,-0.025  
6,18.278,rs1892512,-0.030  
6,18.282,rs6597241,-0.031  
6,18.287,rs2765366,-0.033  
6,18.293,rs12206270,-0.035  
6,18.300,rs6921610,-0.038  
6,18.328,rs490213,-0.042  
6,18.390,rs9505022,-0.052  
6,18.560,rs6906505,-0.089  
6,18.613,rs11965592,-0.092  
6,18.626,rs2842363,-0.092  
6,18.676,rs3778333,-0.093  
6,19.194,rs2806192,-0.093  
6,19.240,rs4959442,-0.103  
6,19.287,rs13191992,-0.132  
6,19.316,rs1322219,-0.146  
6,19.361,rs2076295,-0.154  
6,19.384,rs2295859,-0.153  
6,19.395,rs2076299,-0.153  
6,19.425,rs2806222,-0.151  
6,19.484,rs9379120,-0.143  
6,19.571,rs12197234,-0.160  
6,19.637,rs6927500,-0.110  
6,19.698,rs270406,-0.096  
6,19.736,rs270404,-0.094  
6,19.797,rs9379137,-0.095  
6,20.034,rs3812162,-0.133  
6,20.052,rs365936,-0.117  
6,20.143,rs1150893,-0.130  
6,20.317,rs2815155,-0.091  
6,20.393,rs4401711,-0.086  
6,20.422,rs9378524,-0.084  
6,20.501,rs6924013,-0.081  
6,20.530,rs491511,-0.081  
6,20.591,rs9392980,-0.084  
6,20.657,rs9502704,-0.077  
6,20.702,rs2817084,-0.072  
6,20.766,rs9393004,-0.071  
6,20.769,rs10484750,-0.071  
6,20.785,rs1199389,-0.071  
6,21.269,rs12184061,-0.075  
6,21.288,rs4326271,-0.074  
6,21.307,rs4960464,-0.080  
6,21.316,rs4566922,-0.080  
6,21.348,rs9378578,-0.100  
6,21.410,rs13211231,-0.138  
6,21.461,rs9502754,-0.149  
6,21.489,rs742301,-0.153  
6,21.539,rs382854,-0.152  
6,21.639,rs2057512,-0.130  
6,21.713,rs9406234,-0.135  
6,22.052,rs9379412,-0.101  
6,22.068,rs7756320,-0.099  
6,22.310,rs16892185,-0.089  
6,22.412,rs742513,-0.087  
6,22.442,rs9369355,-0.086  
6,22.468,rs1001384,-0.086  
6,22.484,rs12194169,-0.086

6,22.832,rs1328140,-0.075  
6,22.950,rs1410364,-0.076  
6,23.051,rs2223236,-0.078  
6,23.111,rs4716001,-0.066  
6,23.152,rs1934775,-0.086  
6,23.227,rs9396671,-0.081  
6,23.316,rs9396715,-0.084  
6,23.334,rs10807600,-0.084  
6,23.474,rs201260,-0.085  
6,23.558,rs1883408,-0.069  
6,23.561,rs7341284,-0.072  
6,23.583,rs855395,-0.094  
6,23.601,rs9477691,-0.092  
6,23.660,rs9371078,-0.082  
6,23.677,rs13209414,-0.080  
6,23.681,rs957610,-0.080  
6,23.690,rs7755414,-0.079  
6,23.702,rs1207005,-0.078  
6,23.706,rs4716310,-0.090  
6,23.708,rs1889211,-0.093  
6,23.708,rs1207009,-0.094  
6,23.791,rs12193757,-0.078  
6,23.843,rs6935000,-0.068  
6,23.845,rs9358225,-0.068  
6,23.860,rs1999565,-0.069  
6,23.906,rs9368113,-0.071  
6,24.006,rs12526330,-0.067  
6,24.044,rs6456333,-0.070  
6,24.133,rs7764232,-0.075  
6,24.174,rs8180539,-0.087  
6,24.301,rs10484886,-0.094  
6,24.360,rs537112,-0.104  
6,24.380,rs3798696,-0.107  
6,24.521,rs501436,-0.102  
6,24.590,rs6905006,-0.096  
6,24.672,rs560194,-0.102  
6,24.837,rs17576994,-0.103  
6,24.870,rs7764197,-0.089  
6,24.895,rs4449626,-0.095  
6,24.937,rs4712802,-0.103  
6,25.176,rs570023,-0.123  
6,25.392,rs3846839,-0.112  
6,25.526,rs6456746,-0.079  
6,25.533,rs2153157,-0.080  
6,25.561,rs4711127,-0.095  
6,25.594,rs4713064,-0.089  
6,25.691,rs7774711,-0.078  
6,25.813,rs16870891,-0.078  
6,26.236,rs10947009,-0.074  
6,26.271,rs3734404,-0.076  
6,26.281,rs2018334,-0.076  
6,26.350,rs6908326,-0.071  
6,26.368,rs6457200,-0.074  
6,26.441,rs7748486,-0.076  
6,26.445,rs2327394,-0.076  
6,26.528,rs9791189,-0.083  
6,26.548,rs7738900,-0.081  
6,26.565,rs2064112,-0.103  
6,26.640,rs7741863,-0.082  
6,26.813,rs9461735,-0.081  
6,26.916,rs7770004,-0.092

6,27.131,rs10947419,-0.111  
6,27.233,rs9469705,-0.121  
6,27.254,rs821437,-0.121  
6,27.260,rs548304,-0.121  
6,27.323,rs1206002,-0.125  
6,27.381,rs9469853,-0.122  
6,27.431,rs9348953,-0.120  
6,27.431,rs210920,-0.120  
6,27.483,rs9296142,-0.109  
6,27.568,rs9470042,-0.090  
6,27.571,rs760788,-0.088  
6,27.581,rs9380521,-0.081  
6,27.608,rs9368883,-0.062  
6,27.624,rs4713922,-0.052  
6,27.724,rs10947590,-0.045  
6,27.805,rs6457927,-0.027  
6,27.879,rs6937349,-0.022  
6,27.892,rs17406952,-0.021  
6,28.175,rs2327506,-0.035  
6,28.205,rs12234132,-0.036  
6,28.209,rs9470843,-0.036  
6,28.312,rs10947756,-0.051  
6,28.338,rs9380781,-0.052  
6,28.394,rs2228220,-0.054  
6,28.536,rs11755555,-0.064  
6,28.631,rs2327538,-0.071  
6,28.745,rs521824,-0.097  
6,28.798,rs5370,-0.093  
6,28.875,rs4379286,-0.078  
6,28.945,rs6925906,-0.053  
6,28.963,rs4714469,-0.046  
6,28.988,rs9462724,-0.041  
6,29.081,rs9471712,-0.026  
6,29.109,rs9381141,-0.025  
6,29.303,rs9369394,-0.034  
6,29.314,rs2095343,-0.034  
6,29.435,rs9369414,-0.019  
6,29.474,rs16873023,-0.020  
6,29.594,rs472072,-0.024  
6,29.719,rs7745298,-0.018  
6,29.794,rs560810,-0.018  
6,30.070,rs3945322,-0.035  
6,30.180,rs1332844,-0.038  
6,30.448,rs1223517,-0.037  
6,30.462,rs9296614,-0.037  
6,30.490,rs1223552,-0.038  
6,30.540,rs1008461,-0.037  
6,30.568,rs6927426,-0.036  
6,30.660,rs2458304,-0.031  
6,30.688,rs6919374,-0.022  
6,30.716,rs517803,-0.015  
6,30.735,rs4715248,-0.011  
6,30.803,rs551499,-0.002  
6,30.811,rs7775293,-0.002  
6,30.842,rs2115063,-0.000  
6,30.960,rs4712047,0.000  
6,30.971,rs2841523,0.000  
6,31.022,rs412970,0.003  
6,31.039,rs1573701,0.002  
6,31.054,rs3734671,0.000  
6,31.057,rs4715568,0.000

6,31.080,rs9647614,0.000  
6,31.085,rs12662217,0.000  
6,31.121,rs280143,-0.000  
6,31.159,rs10484348,-0.000  
6,31.163,rs9367805,-0.002  
6,31.197,rs9476476,-0.005  
6,31.238,rs2013807,-0.005  
6,31.265,rs12177758,-0.003  
6,31.315,rs9885921,-0.001  
6,31.588,rs2094923,-0.002  
6,31.660,rs7752155,-0.002  
6,31.767,rs13201062,-0.002  
6,32.029,rs9349942,-0.000  
6,32.324,rs1267480,-0.000  
6,32.549,rs857477,-0.000  
6,32.600,rs857424,-0.000  
6,32.687,rs7764728,-0.001  
6,32.695,rs707821,-0.001  
6,32.834,rs764650,-0.005  
6,32.839,rs1267505,-0.005  
6,32.982,rs2472796,-0.008  
6,33.016,rs2472802,-0.008  
6,33.099,rs768543,-0.007  
6,33.114,rs233504,-0.007  
6,33.142,rs233494,-0.006  
6,33.618,rs9383032,-0.005  
6,34.390,rs6915344,-0.009  
6,34.630,rs6922136,-0.010  
6,34.670,rs2237113,-0.010  
6,34.672,rs2282815,-0.010  
6,34.791,rs6930152,-0.018  
6,34.798,rs2619514,-0.019  
6,34.818,rs6913914,-0.019  
6,34.826,rs74111,-0.012  
6,34.831,rs9383079,-0.011  
6,34.855,rs220938,-0.010  
6,34.900,rs6932716,-0.006  
6,34.979,rs727295,-0.002  
6,34.993,rs7767544,-0.001  
6,35.047,rs6459448,-0.001  
6,35.232,rs2038037,-0.000  
6,35.462,rs4716059,-0.000  
6,35.489,rs16885,-0.001  
6,35.512,rs179996,-0.001  
6,35.559,rs9383153,-0.000  
6,35.619,rs9396666,0.000  
6,35.667,rs9396669,0.001  
6,35.669,rs3819400,0.001  
6,35.688,rs404143,0.000  
6,35.731,rs932411,0.000  
6,35.756,rs1015568,0.000  
6,35.930,rs981459,0.003  
6,35.971,rs12204397,0.004  
6,35.973,rs9350008,0.004  
6,35.998,rs235158,0.004  
6,36.049,rs16878314,0.004  
6,36.069,rs3817837,0.005  
6,36.080,rs9477153,0.005  
6,36.157,rs9350009,0.006  
6,36.196,rs2237182,0.007  
6,36.220,rs11756866,0.008

6,36.267,rs721010,0.015  
6,36.403,rs742328,0.023  
6,36.545,rs2237166,0.022  
6,36.659,rs3812192,0.025  
6,36.691,rs6903850,0.028  
6,36.743,rs3812205,0.034  
6,36.765,rs531089,0.035  
6,36.908,rs493352,0.035  
6,36.917,rs3806152,0.035  
6,36.940,rs10456790,0.036  
6,37.031,rs528785,0.041  
6,37.123,rs10949381,0.030  
6,37.141,rs685183,0.033  
6,37.182,rs1240808,0.048  
6,37.446,rs1473730,0.103  
6,37.452,rs9383214,0.103  
6,37.488,rs7763768,0.082  
6,37.697,rs9383219,0.088  
6,37.816,rs11753264,0.087  
6,37.922,rs9396742,0.092  
6,37.979,rs4360123,0.092  
6,38.006,rs6926443,0.096  
6,38.015,rs4716108,0.099  
6,38.076,rs1535546,0.117  
6,38.140,rs6459529,0.143  
6,38.209,rs12216482,0.198  
6,38.214,rs12526082,0.200  
6,38.263,rs7773313,0.212  
6,38.295,rs10485376,0.224  
6,38.312,rs3777686,0.231  
6,38.397,rs9465047,0.225  
6,38.402,rs10807614,0.225  
6,38.528,rs9350051,0.182  
6,38.531,rs3777712,0.182  
6,38.730,rs2038743,0.187  
6,38.794,rs9396802,0.189  
6,38.794,rs11756169,0.158  
6,38.795,rs12197692,0.158  
6,39.038,rs760849,0.216  
6,39.255,rs1569542,0.216  
6,39.319,rs10807621,0.208  
6,39.447,rs9358148,0.171  
6,39.452,rs12194394,0.171  
6,39.474,rs12524744,0.173  
6,39.524,rs2842938,0.177  
6,39.653,rs214590,0.222  
6,39.925,rs9297068,0.236  
6,40.088,rs10949509,0.264  
6,40.119,rs13196052,0.267  
6,40.334,rs1983569,0.283  
6,40.339,rs6925505,0.284  
6,40.498,rs1998416,0.334  
6,40.527,rs1418968,0.331  
6,40.708,rs13196368,0.304  
6,40.901,rs9368038,0.293  
6,40.922,rs1858504,0.322  
6,40.987,rs9295427,0.306  
6,41.055,rs1463780,0.266  
6,41.079,rs1495982,0.253  
6,41.128,rs4560636,0.225  
6,41.135,rs9295438,0.221

6,41.200,rs4712415,0.194  
6,41.230,rs9465438,0.196  
6,41.231,rs10484720,0.196  
6,41.233,rs760669,0.196  
6,41.237,rs1883233,0.195  
6,41.241,rs2179176,0.194  
6,41.258,rs2743610,0.192  
6,41.330,rs2031255,0.183  
6,41.333,rs1033872,0.182  
6,41.394,rs1209816,0.168  
6,41.404,rs7766034,0.166  
6,41.470,rs973244,0.168  
6,41.471,rs6926229,0.165  
6,41.482,rs1047033,0.140  
6,41.496,rs742227,0.135  
6,41.499,rs9366320,0.141  
6,41.517,rs7772056,0.166  
6,41.528,rs7769434,0.185  
6,41.554,rs10456227,0.193  
6,41.565,rs1202292,0.196  
6,41.589,rs2782187,0.203  
6,41.597,rs16883016,0.205  
6,41.603,rs517374,0.201  
6,41.614,rs17560881,0.189  
6,41.622,rs9350204,0.180  
6,41.644,rs7763815,0.177  
6,41.712,rs9348410,0.139  
6,41.723,rs2457334,0.150  
6,41.724,rs1555004,0.137  
6,41.738,rs2472756,0.156  
6,41.763,rs2483767,0.138  
6,41.835,rs2457322,0.124  
6,41.970,rs9358309,0.141  
6,41.982,rs6907076,0.152  
6,41.995,rs4712463,0.166  
6,42.010,rs1536581,0.176  
6,42.094,rs717208,0.177  
6,42.095,rs6940079,0.177  
6,42.121,rs7746765,0.178  
6,42.128,rs4712465,0.179  
6,42.469,rs9350245,0.202  
6,42.539,rs1570155,0.194  
6,42.638,rs911361,0.142  
6,42.647,rs746720,0.142  
6,42.753,rs9295468,0.165  
6,42.832,rs7747931,0.173  
6,42.853,rs761154,0.170  
6,42.922,rs2206740,0.170  
6,42.956,rs6928012,0.170  
6,43.030,rs4077405,0.185  
6,43.075,rs4712573,0.184  
6,43.078,rs6913817,0.183  
6,43.133,rs4323302,0.156  
6,43.357,rs10214694,0.094  
6,43.364,rs9358401,0.092  
6,43.394,rs6937811,0.101  
6,43.397,rs10806933,0.101  
6,43.402,rs12202180,0.100  
6,43.436,rs1459046,0.104  
6,43.517,rs807850,0.116  
6,43.574,rs12191693,0.128

6,43.574,rs2064301,0.128  
6,43.609,rs6456421,0.105  
6,43.661,rs9466097,0.100  
6,43.681,rs4236005,0.120  
6,43.812,rs1744885,0.159  
6,43.826,rs6918842,0.140  
6,43.834,rs4712626,0.129  
6,43.872,rs1322884,0.114  
6,43.969,rs2094571,0.119  
6,44.076,rs952579,0.134  
6,44.209,rs12207699,0.157  
6,44.270,rs6927510,0.159  
6,44.323,rs1928176,0.163  
6,44.361,rs6922362,0.152  
6,44.475,rs9350407,0.220  
6,44.498,rs7744710,0.236  
6,44.526,rs1207774,0.264  
6,44.548,rs1736512,0.284  
6,44.602,rs9366426,0.298  
6,44.617,rs9295533,0.302  
6,44.751,rs10484386,0.344  
6,44.780,rs4712653,0.353  
6,44.851,rs10498705,0.365  
6,45.217,rs9358504,0.327  
6,45.241,rs7739417,0.322  
6,45.260,rs7751843,0.290  
6,45.263,rs7749084,0.291  
6,45.477,rs2066266,0.283  
6,45.518,rs849874,0.284  
6,45.642,rs9358533,0.289  
6,45.703,rs1205896,0.302  
6,45.835,rs719332,0.323  
6,45.900,rs6933317,0.340  
6,46.052,rs2328715,0.383  
6,46.052,rs6456494,0.383  
6,46.056,rs6903615,0.384  
6,46.067,rs4286772,0.362  
6,46.083,rs4077636,0.312  
6,46.112,rs6933879,0.274  
6,46.143,rs1107271,0.264  
6,46.173,rs1928078,0.236  
6,46.252,rs2498259,0.166  
6,46.338,rs12663119,0.090  
6,46.351,rs4639331,0.081  
6,46.354,rs9379482,0.078  
6,46.374,rs4452636,0.063  
6,46.375,rs4236026,0.063  
6,46.376,rs6906444,0.063  
6,46.401,rs9393387,0.060  
6,46.414,rs7751597,0.056  
6,46.452,rs6918629,0.036  
6,46.455,rs1925458,0.037  
6,46.457,rs9393409,0.038  
6,46.470,rs7775425,0.067  
6,46.516,rs199032,0.096  
6,46.532,rs955978,0.097  
6,46.582,rs10456274,0.080  
6,46.626,rs199055,0.071  
6,46.658,rs16887636,0.063  
6,46.845,rs197988,0.027  
6,46.849,rs6934968,0.028



6,46.860,rs197999,0.034  
6,46.892,rs9466869,0.033  
6,46.986,rs503082,0.029  
6,47.153,rs9393495,0.006  
6,47.184,rs12214182,0.001  
6,47.213,rs9466975,0.003  
6,47.222,rs474833,0.003  
6,47.228,rs9393510,0.003  
6,47.256,rs499466,0.004  
6,47.286,rs1511479,0.007  
6,47.296,rs1511481,0.007  
6,47.299,rs17529740,0.007  
6,47.303,rs16888503,0.006  
6,47.469,rs9467041,0.001  
6,47.482,rs9379643,0.001  
6,47.486,rs6922632,0.001  
6,47.508,rs1277149,0.001  
6,47.569,rs10946675,0.001  
6,47.760,rs1770909,0.004  
6,48.014,rs2744591,0.001  
6,48.149,rs2817239,0.000  
6,48.162,rs2760181,0.000  
6,48.196,rs12213545,0.000  
6,48.208,rs2817198,0.000  
6,48.224,rs6902039,-0.000  
6,48.235,rs5026394,-0.000  
6,48.339,rs3087943,-0.000  
6,48.411,rs1885211,-0.000  
6,48.462,rs9379687,-0.001  
6,48.470,rs2145753,-0.001  
6,48.631,rs9358803,-0.005  
6,48.662,rs4712860,-0.006  
6,48.858,rs680009,-0.018  
6,48.913,rs127489,-0.013  
6,49.111,rs6918101,-0.017  
6,49.143,rs303031,-0.025  
6,49.517,rs916539,-0.011  
6,49.534,rs6941417,-0.011  
6,49.549,rs9358839,-0.010  
6,49.568,rs2328869,-0.010  
6,49.573,rs1880269,-0.010  
6,49.587,rs10080837,-0.010  
6,49.591,rs2690106,-0.009  
6,49.610,rs9379751,-0.003  
6,49.636,rs2206194,-0.003  
6,49.640,rs6456672,-0.003  
6,49.651,rs10456044,-0.002  
6,49.674,rs6912426,-0.001  
6,49.682,rs12213948,-0.000  
6,49.700,rs6456683,-0.000  
6,49.705,rs301396,-0.000  
6,49.750,rs441460,-0.001  
6,49.789,rs1980449,-0.002  
6,49.801,rs9461190,-0.002  
6,49.824,rs16890972,-0.002  
6,49.901,rs2051541,-0.001  
6,49.962,rs198828,-0.001  
6,50.007,rs6913828,-0.002  
6,50.035,rs3778279,-0.002  
6,50.099,rs3736781,-0.003  
6,50.287,rs13194491,-0.009

6, 50.369, rs7771953, -0.013  
6, 50.437, rs16867808, -0.011  
6, 50.443, rs2205829, -0.010  
6, 50.525, rs4713119, -0.012  
6, 50.535, rs6915101, -0.012  
6, 50.890, rs9468254, -0.023  
6, 50.962, rs17404424, -0.025  
6, 50.973, rs238872, -0.025  
6, 50.974, rs9393956, -0.035  
6, 50.976, rs1419633, -0.034  
6, 50.993, rs969931, -0.026  
6, 50.997, rs2745412, -0.025  
6, 50.997, rs2272991, -0.025  
6, 51.000, rs1233391, -0.024  
6, 51.004, rs29230, -0.024  
6, 51.024, rs1737078, -0.016  
6, 51.054, rs2523946, -0.022  
6, 51.055, rs2394255, -0.022  
6, 51.073, rs2523990, -0.021  
6, 51.086, rs2844776, -0.017  
6, 51.088, rs1345229, -0.016  
6, 51.111, rs3132622, -0.006  
6, 51.153, rs1075496, -0.002  
6, 51.161, rs12210092, -0.002  
6, 51.167, rs3131043, -0.002  
6, 51.172, rs4713391, -0.002  
6, 51.174, rs3095352, -0.002  
6, 51.187, rs2844651, -0.003  
6, 51.190, rs11753326, -0.003  
6, 51.193, rs2844680, -0.003  
6, 51.199, rs7758976, -0.006  
6, 51.200, rs2523898, -0.007  
6, 51.200, rs2523897, -0.007  
6, 51.216, rs1265086, -0.012  
6, 51.218, rs3130453, -0.012  
6, 51.233, rs2524099, -0.018  
6, 51.238, rs9366778, -0.018  
6, 51.245, rs2156875, -0.018  
6, 51.245, rs2523608, -0.018  
6, 51.249, rs4713462, -0.021  
6, 51.254, rs2844513, -0.031  
6, 51.260, rs2284178, -0.023  
6, 51.267, rs2844498, -0.043  
6, 51.272, rs2071593, -0.039  
6, 51.276, rs3093662, -0.035  
6, 51.277, rs2256965, -0.034  
6, 51.284, rs2261033, -0.017  
6, 51.285, rs1077393, -0.017  
6, 51.375, rs9267665, -0.022  
6, 51.424, rs429608, -0.024  
6, 51.426, rs492899, -0.024  
6, 51.597, rs408359, -0.016  
6, 51.622, rs2071277, -0.015  
6, 51.639, rs2267644, -0.014  
6, 51.654, rs9267947, -0.013  
6, 51.656, rs17576984, -0.013  
6, 51.792, rs9405098, -0.011  
6, 51.817, rs3129882, -0.010  
6, 51.819, rs2239804, -0.010  
6, 51.955, rs532098, -0.012  
6, 52.026, rs6457617, -0.013

6,52.039,rs3129727,-0.013  
6,52.041,rs9275601,-0.013  
6,52.041,rs3873444,-0.007  
6,52.067,rs2071800,-0.013  
6,52.074,rs10807113,-0.015  
6,52.122,rs2070121,-0.027  
6,52.125,rs2857107,-0.027  
6,52.128,rs9784758,-0.028  
6,52.136,rs241436,-0.019  
6,52.141,rs3819715,-0.017  
6,52.141,rs241424,-0.017  
6,52.189,rs241407,-0.009  
6,52.204,rs154981,-0.007  
6,52.214,rs9296059,-0.006  
6,52.220,rs3129299,-0.006  
6,52.223,rs171329,-0.006  
6,52.270,rs9500927,-0.002  
6,52.279,rs453779,-0.001  
6,52.288,rs423639,-0.001  
6,52.295,rs6920606,-0.001  
6,52.300,rs9277052,-0.002  
6,52.323,rs9277341,-0.004  
6,52.362,rs3117008,-0.005  
6,52.364,rs2294478,-0.005  
6,52.380,rs756441,-0.006  
6,52.473,rs456261,-0.013  
6,52.629,rs210179,-0.018  
6,52.666,rs210134,-0.021  
6,52.675,rs394199,-0.023  
6,52.724,rs4259245,-0.067  
6,52.729,rs1536036,-0.069  
6,52.740,rs4713653,-0.074  
6,52.749,rs3818528,-0.076  
6,52.764,rs4711369,-0.098  
6,52.838,rs7772005,-0.057  
6,52.897,rs2495971,-0.050  
6,53.005,rs2499766,-0.040  
6,53.036,rs2495990,-0.029  
6,53.310,rs1873250,-0.016  
6,53.609,rs9469718,-0.019  
6,53.659,rs2499730,-0.020  
6,54.169,rs206937,-0.005  
6,54.571,rs4713808,-0.004  
6,54.670,rs3798544,-0.003  
6,54.699,rs10947510,-0.002  
6,54.902,rs3823438,-0.003  
6,55.008,rs732594,-0.005  
6,55.076,rs9658119,-0.004  
6,55.101,rs7757405,-0.004  
6,55.155,rs7757037,-0.001  
6,55.185,rs1475774,-0.002  
6,55.232,rs2766559,-0.005  
6,55.262,rs2859418,-0.006  
6,55.265,rs17704843,-0.006  
6,55.309,rs651158,-0.011  
6,55.316,rs2295852,-0.012  
6,55.355,rs851019,-0.013  
6,55.359,rs7770710,-0.012  
6,55.412,rs9394333,-0.007  
6,55.447,rs4713942,-0.006  
6,55.448,rs7775107,-0.006

6,55.448,rs4713944,-0.006  
6,55.456,rs12665222,-0.012  
6,55.465,rs732394,-0.016  
6,55.466,rs4713955,-0.016  
6,55.468,rs12662591,-0.015  
6,55.474,rs763018,-0.013  
6,55.479,rs11965340,-0.010  
6,55.485,rs16888069,-0.008  
6,55.486,rs2269563,-0.007  
6,55.497,rs2071797,-0.005  
6,55.509,rs7747099,-0.001  
6,55.657,rs853884,0.004  
6,55.905,rs9462209,0.043  
6,55.907,rs10807170,0.044  
6,56.034,rs7763347,0.026  
6,56.063,rs236434,0.025  
6,56.086,rs4714010,0.024  
6,56.087,rs16889125,0.024  
6,56.095,rs958423,0.024  
6,56.111,rs110033,0.014  
6,56.126,rs236374,0.014  
6,56.134,rs236358,0.008  
6,56.244,rs1405069,0.035  
6,56.275,rs12524778,0.037  
6,56.290,rs831513,0.036  
6,56.315,rs6457967,0.031  
6,56.315,rs831481,0.031  
6,56.371,rs7758789,0.026  
6,56.406,rs9380645,0.024  
6,56.418,rs262902,0.016  
6,56.458,rs900002,0.016  
6,56.483,rs2776800,0.022  
6,56.579,rs9394429,0.026  
6,56.579,rs195403,0.026  
6,56.627,rs2284923,0.026  
6,56.638,rs195434,0.026  
6,56.760,rs10498738,0.019  
6,56.765,rs17636617,0.016  
6,56.772,rs12211948,0.015  
6,56.779,rs6457993,0.014  
6,56.788,rs1891611,0.011  
6,56.795,rs928349,0.014  
6,56.811,rs1738457,0.021  
6,56.812,rs6925759,0.021  
6,56.828,rs7773994,0.025  
6,56.833,rs9357249,0.049  
6,56.840,rs4714084,0.043  
6,56.853,rs6926735,0.041  
6,56.859,rs10947686,0.037  
6,56.878,rs6922589,0.026  
6,56.910,rs6938061,0.033  
6,56.919,rs742787,0.033  
6,56.931,rs4565301,0.039  
6,57.028,rs7776025,0.032  
6,57.029,rs2842518,0.032  
6,57.091,rs12194275,0.030  
6,57.133,rs7742915,0.034  
6,57.158,rs12526152,0.029  
6,57.169,rs12191476,0.027  
6,57.181,rs9470850,0.025  
6,57.314,rs6904723,0.027

6,57.337,rs4316001,0.028  
6,57.341,rs9369064,0.020  
6,57.344,rs7740763,0.019  
6,57.371,rs6931131,0.017  
6,57.472,rs6932648,0.022  
6,57.500,rs1623375,0.022  
6,57.560,rs1738220,0.028  
6,57.615,rs862435,0.027  
6,57.633,rs6458085,0.018  
6,57.687,rs1412266,0.009  
6,57.706,rs2281345,0.011  
6,57.713,rs1332010,0.011  
6,57.744,rs2235868,0.010  
6,57.751,rs2206942,0.011  
6,57.782,rs9470970,0.004  
6,57.785,rs6905394,0.004  
6,57.809,rs10947785,0.003  
6,57.876,rs1978609,0.001  
6,57.917,rs751933,0.000  
6,58.112,rs1651106,-0.001  
6,58.196,rs2395718,-0.002  
6,58.453,rs9394587,-0.002  
6,58.621,rs2466405,-0.005  
6,58.652,rs10498743,-0.003  
6,58.717,rs302572,-0.001  
6,58.826,rs303648,0.000  
6,58.882,rs302603,0.001  
6,58.976,rs1318002,0.007  
6,59.020,rs13212273,0.014  
6,59.104,rs3003946,0.018  
6,59.116,rs7771410,0.019  
6,59.260,rs9462589,0.037  
6,59.579,rs7750979,0.042  
6,59.652,rs3846892,0.047  
6,59.815,rs9394679,0.068  
6,59.842,rs4714329,0.071  
6,59.932,rs966082,0.072  
6,59.937,rs1886753,0.072  
6,59.996,rs3734557,0.069  
6,60.052,rs13196792,0.060  
6,60.078,rs4714346,0.066  
6,60.102,rs1347257,0.056  
6,60.153,rs9394699,0.053  
6,60.224,rs909988,0.047  
6,60.277,rs432959,0.039  
6,60.422,rs9367063,0.034  
6,60.450,rs7765378,0.035  
6,60.475,rs6939085,0.040  
6,60.535,rs6931798,0.053  
6,60.581,rs7773686,0.052  
6,60.704,rs7767835,0.053  
6,60.752,rs10738088,0.040  
6,60.799,rs6907181,0.046  
6,60.894,rs914509,0.049  
6,60.945,rs2395760,0.051  
6,61.002,rs7739373,0.052  
6,61.021,rs6907756,0.052  
6,61.364,rs7748777,0.050  
6,61.494,rs2395767,0.076  
6,61.553,rs16894387,0.078  
6,61.567,rs6458211,0.079

6,61.617,rs629832,0.081  
6,61.621,rs6458214,0.082  
6,61.646,rs2236369,0.095  
6,61.678,rs6922617,0.132  
6,61.687,rs7768605,0.135  
6,61.713,rs1535582,0.126  
6,61.715,rs728488,0.129  
6,61.747,rs628134,0.161  
6,61.774,rs9381065,0.172  
6,61.799,rs2496635,0.172  
6,61.808,rs6937336,0.182  
6,61.809,rs728826,0.184  
6,61.823,rs2496637,0.166  
6,61.831,rs2495235,0.176  
6,61.839,rs6907558,0.189  
6,61.847,rs2495232,0.185  
6,61.930,rs2496652,0.161  
6,62.298,rs9381084,0.142  
6,62.516,rs16894871,0.160  
6,62.570,rs4714501,0.166  
6,62.580,rs2230088,0.153  
6,62.590,rs2143678,0.136  
6,62.612,rs1474761,0.122  
6,62.647,rs4714503,0.122  
6,62.677,rs6458234,0.123  
6,62.703,rs1011101,0.123  
6,62.733,rs9349199,0.124  
6,62.947,rs13202921,0.126  
6,63.117,rs6912200,0.127  
6,63.540,rs2249703,0.133  
6,63.735,rs12110546,0.128  
6,63.818,rs6921368,0.125  
6,63.842,rs9369325,0.119  
6,63.870,rs4554318,0.115  
6,63.912,rs12194513,0.114  
6,63.916,rs7763360,0.112  
6,63.931,rs6906808,0.104  
6,63.953,rs7749023,0.117  
6,63.974,rs9394865,0.099  
6,63.992,rs9462772,0.084  
6,64.015,rs9471779,0.087  
6,64.017,rs4714572,0.072  
6,64.031,rs2492942,0.056  
6,64.062,rs2236046,0.051  
6,64.182,rs7755400,0.111  
6,64.241,rs17704222,0.140  
6,64.323,rs4714598,0.161  
6,64.431,rs599088,0.195  
6,64.469,rs1038890,0.207  
6,64.532,rs694148,0.210  
6,64.593,rs2016352,0.210  
6,64.959,rs375435,0.192  
6,64.975,rs9471904,0.192  
6,64.986,rs2268684,0.194  
6,65.088,rs9381218,0.223  
6,65.195,rs12529592,0.218  
6,65.228,rs6936589,0.222  
6,65.230,rs9381223,0.222  
6,65.353,rs2234185,0.232  
6,65.811,rs17209372,0.254  
6,65.841,rs2651195,0.256

6,65.998,rs11965886,0.260  
6,66.184,rs2185631,0.256  
6,66.217,rs1674870,0.273  
6,66.522,rs16869037,0.260  
6,66.522,rs6908311,0.260  
6,66.553,rs1761769,0.250  
6,66.609,rs7749629,0.208  
6,66.613,rs945131,0.208  
6,66.663,rs3025010,0.235  
6,66.691,rs1358980,0.227  
6,66.700,rs943084,0.209  
6,66.709,rs4507587,0.194  
6,66.746,rs9381257,0.206  
6,66.766,rs9369426,0.212  
6,66.776,rs1536304,0.207  
6,66.784,rs1326142,0.207  
6,66.801,rs11968561,0.207  
6,66.803,rs9369430,0.207  
6,66.869,rs9381262,0.202  
6,66.894,rs1776721,0.225  
6,66.909,rs833621,0.197  
6,66.962,rs9472173,0.173  
6,66.969,rs7755431,0.179  
6,66.976,rs4714724,0.205  
6,67.054,rs6907643,0.138  
6,67.082,rs910603,0.126  
6,67.103,rs9472201,0.119  
6,67.111,rs9462957,0.116  
6,67.161,rs4714738,0.135  
6,67.192,rs877111,0.151  
6,67.293,rs9369461,0.132  
6,67.303,rs6925778,0.134  
6,67.342,rs9369465,0.148  
6,67.400,rs666462,0.128  
6,67.443,rs730775,0.123  
6,67.512,rs7740535,0.103  
6,67.524,rs4714776,0.100  
6,67.529,rs2396242,0.100  
6,67.690,rs13198841,0.093  
6,67.722,rs10484624,0.084  
6,67.754,rs543844,0.077  
6,67.779,rs9395021,0.075  
6,67.798,rs7759209,0.062  
6,67.831,rs9296440,0.032  
6,67.866,rs9381336,0.026  
6,67.881,rs9462996,0.022  
6,67.896,rs1040939,0.021  
6,67.916,rs9472301,0.020  
6,67.931,rs9367205,0.019  
6,67.969,rs326815,0.018  
6,68.014,rs6913259,0.009  
6,68.110,rs660953,0.005  
6,68.151,rs227813,0.005  
6,68.504,rs508494,0.007  
6,68.815,rs9296451,0.009  
6,68.944,rs927657,0.012  
6,69.282,rs16873396,0.012  
6,69.400,rs12665622,0.021  
6,69.522,rs485817,0.023  
6,69.536,rs1928532,0.033  
6,69.802,rs2039541,0.035

6,69.838,rs829911,0.033  
6,69.867,rs1449648,0.028  
6,69.931,rs4714874,0.011  
6,69.999,rs1375702,0.009  
6,70.098,rs6458478,0.007  
6,70.105,rs3777543,0.007  
6,70.125,rs2396578,0.007  
6,70.217,rs3777594,0.002  
6,70.271,rs3777601,0.002  
6,70.468,rs1209198,0.008  
6,70.517,rs946223,0.008  
6,70.576,rs2185108,0.010  
6,70.733,rs6458491,0.014  
6,70.838,rs10807337,0.016  
6,70.866,rs6458495,0.015  
6,70.933,rs7744272,0.008  
6,71.023,rs12528557,0.006  
6,71.689,rs876121,0.035  
6,71.933,rs806506,0.038  
6,72.047,rs2206926,0.045  
6,72.100,rs3799873,0.036  
6,72.155,rs960718,0.030  
6,72.171,rs2396821,0.030  
6,72.179,rs9395232,0.031  
6,72.210,rs1630504,0.034  
6,72.232,rs10484958,0.036  
6,72.246,rs1884043,0.036  
6,72.281,rs9369663,0.037  
6,72.332,rs6919828,0.024  
6,72.363,rs9473036,0.020  
6,72.383,rs9473045,0.017  
6,72.459,rs7744364,0.012  
6,72.490,rs10456568,0.004  
6,72.596,rs9473100,0.001  
6,72.755,rs17289226,-0.000  
6,73.009,rs1360156,-0.004  
6,73.065,rs1329521,-0.004  
6,73.100,rs2039122,-0.002  
6,73.125,rs1325694,-0.001  
6,73.188,rs6458601,0.000  
6,73.240,rs615396,0.000  
6,73.263,rs325286,0.001  
6,73.272,rs16877484,0.001  
6,73.291,rs9463425,0.001  
6,73.332,rs9473468,0.001  
6,73.362,rs1938201,0.001  
6,73.406,rs10484961,0.001  
6,73.462,rs9381793,0.001  
6,73.486,rs4711930,0.001  
6,73.494,rs9463517,0.001  
6,73.525,rs12624,0.001  
6,73.550,rs699986,0.001  
6,73.570,rs780444,0.001  
6,73.601,rs2792833,0.000  
6,73.616,rs9473701,0.000  
6,73.618,rs1337823,0.000  
6,73.654,rs7764185,0.000  
6,73.728,rs9381861,0.000  
6,73.739,rs1361504,0.000  
6,73.752,rs9349534,-0.002  
6,73.794,rs7758661,-0.007



6,73.794,rs200257,-0.007  
6,73.921,rs2206272,-0.013  
6,73.942,rs2635727,-0.015  
6,74.020,rs283548,-0.008  
6,74.059,rs1886570,-0.006  
6,74.147,rs9473992,-0.005  
6,74.163,rs1536506,-0.004  
6,74.430,rs2439040,-0.006  
6,74.503,rs4715227,-0.007  
6,74.778,rs12206227,-0.025  
6,74.795,rs4715247,-0.025  
6,74.799,rs6935568,-0.024  
6,74.828,rs788510,-0.018  
6,74.835,rs788511,-0.018  
6,74.906,rs1321517,-0.016  
6,75.004,rs1266922,-0.011  
6,75.010,rs1266924,-0.010  
6,75.011,rs1321507,-0.010  
6,75.145,rs9370096,-0.012  
6,75.229,rs7768816,-0.012  
6,75.333,rs4715284,-0.006  
6,75.392,rs1999673,-0.003  
6,75.407,rs658262,-0.003  
6,75.422,rs9395771,-0.003  
6,75.473,rs2245502,-0.004  
6,75.568,rs11964472,-0.004  
6,75.590,rs1359227,-0.005  
6,75.595,rs567084,-0.004  
6,75.596,rs570854,-0.004  
6,75.601,rs8180555,-0.004  
6,75.758,rs614570,-0.003  
6,75.923,rs9382120,-0.003  
6,75.930,rs9474249,-0.003  
6,75.936,rs10484874,-0.003  
6,75.941,rs1883931,-0.003  
6,75.957,rs7746685,-0.007  
6,76.000,rs9474254,-0.006  
6,76.049,rs10948711,-0.004  
6,76.054,rs9296687,-0.003  
6,76.094,rs2670153,-0.003  
6,76.120,rs2180323,-0.003  
6,76.175,rs9296691,-0.003  
6,76.188,rs9474314,-0.007  
6,76.272,rs4715326,-0.003  
6,76.436,rs557135,-0.000  
6,76.504,rs4712026,-0.000  
6,76.522,rs521664,0.001  
6,76.609,rs316144,0.000  
6,76.758,rs10484407,-0.000  
6,76.858,rs9382181,-0.000  
6,77.009,rs2281274,-0.001  
6,77.097,rs209510,-0.006  
6,77.153,rs7776264,-0.021  
6,77.244,rs1377392,-0.015  
6,77.258,rs9395865,-0.016  
6,77.322,rs510420,-0.032  
6,77.332,rs6922238,-0.033  
6,77.364,rs574389,-0.034  
6,77.429,rs4712036,-0.028  
6,77.431,rs7738142,-0.029  
6,77.447,rs655630,-0.037

6,77.458,rs681635,-0.034  
6,77.496,rs9382219,-0.029  
6,77.500,rs497085,-0.029  
6,77.567,rs9370224,-0.031  
6,77.575,rs3823111,-0.032  
6,77.579,rs3799260,-0.033  
6,77.620,rs9370225,-0.033  
6,77.650,rs4715416,-0.023  
6,77.686,rs12201213,-0.017  
6,77.761,rs4715423,-0.014  
6,77.842,rs1409106,-0.012  
6,77.844,rs6930213,-0.017  
6,77.852,rs10484652,-0.010  
6,77.869,rs9474720,-0.002  
6,77.965,rs10484646,0.000  
6,77.986,rs3798276,0.000  
6,78.008,rs10948814,0.000  
6,78.016,rs16885273,0.000  
6,78.045,rs7757433,0.000  
6,78.143,rs1039693,0.000  
6,78.175,rs1546321,-0.000  
6,78.222,rs3125272,0.000  
6,78.223,rs2047809,0.000  
6,78.279,rs7775745,0.000  
6,78.296,rs2134294,-0.000  
6,78.303,rs958626,-0.000  
6,78.304,rs3963,-0.000  
6,78.315,rs10498805,0.000  
6,78.318,rs9464247,0.000  
6,78.361,rs9464252,0.000  
6,78.374,rs6917354,0.000  
6,78.467,rs3925003,0.001  
6,78.500,rs4236134,0.002  
6,78.645,rs4267958,0.008  
6,78.774,rs1154854,0.016  
6,78.979,rs3734444,0.017  
6,78.987,rs9367669,0.016  
6,79.297,rs9475556,0.023  
6,79.362,rs9464342,0.024  
6,79.620,rs7771018,0.030  
6,79.683,rs1925164,0.038  
6,79.684,rs1925163,0.038  
6,79.807,rs9464379,0.048  
6,79.807,rs9370523,0.048  
6,79.829,rs2397220,0.049  
6,79.888,rs2143349,0.058  
6,79.949,rs594008,0.076  
6,79.984,rs7750332,0.092  
6,80.095,rs9918490,0.107  
6,80.099,rs12204927,0.107  
6,80.107,rs1870639,0.109  
6,80.139,rs7747096,0.087  
6,80.141,rs1860652,0.070  
6,80.154,rs9476005,0.060  
6,80.256,rs3013143,0.047  
6,80.541,rs1414803,0.019  
6,80.560,rs11757669,0.018  
6,80.672,rs9341378,0.015  
6,80.776,rs9343253,0.013  
6,81.035,rs10485358,0.025  
6,81.089,rs2200105,0.026

6,81.100,rs1482455,0.027  
6,81.119,rs3003672,0.025  
6,81.151,rs10944484,0.023  
6,81.176,rs2050623,0.021  
6,81.182,rs17403480,0.021  
6,81.223,rs2184404,0.021  
6,81.261,rs9452511,0.021  
6,81.278,rs6934929,0.022  
6,81.314,rs4710286,0.021  
6,81.334,rs9453089,0.021  
6,81.349,rs16895902,0.023  
6,81.391,rs2144715,0.029  
6,81.427,rs9345588,0.034  
6,81.443,rs2350289,0.032  
6,81.483,rs1041522,0.030  
6,81.574,rs9354216,0.017  
6,81.639,rs11968993,0.011  
6,81.644,rs441770,0.011  
6,81.650,rs1502991,0.010  
6,81.732,rs9351511,0.013  
6,81.837,rs9453400,0.013  
6,81.861,rs12234120,0.013  
6,81.871,rs2000382,0.013  
6,81.872,rs9453448,0.013  
6,81.878,rs2814107,0.012  
6,81.916,rs851880,0.007  
6,81.939,rs12192666,0.007  
6,81.980,rs6900214,0.007  
6,82.006,rs851854,0.007  
6,82.115,rs6455106,0.006  
6,82.347,rs2812143,0.003  
6,82.478,rs10806542,0.002  
6,82.552,rs183895,0.001  
6,82.580,rs9453873,0.002  
6,82.619,rs966984,0.003  
6,82.663,rs13205957,0.005  
6,82.687,rs6911607,0.006  
6,82.780,rs10944945,0.006  
6,82.880,rs9294750,0.004  
6,83.087,rs9363809,0.008  
6,83.089,rs12663045,0.008  
6,83.203,rs7768996,0.024  
6,83.229,rs897405,0.025  
6,83.231,rs10945056,0.025  
6,83.273,rs945823,0.023  
6,83.281,rs777625,0.022  
6,83.322,rs778010,0.021  
6,83.359,rs1388052,0.033  
6,83.372,rs1907146,0.032  
6,83.401,rs2220589,0.030  
6,83.405,rs9342706,0.029  
6,83.421,rs17576708,0.024  
6,83.445,rs7749220,0.018  
6,83.451,rs4708157,0.017  
6,83.459,rs352523,0.025  
6,83.615,rs10484791,0.019  
6,83.672,rs500125,0.019  
6,83.701,rs2342761,0.019  
6,83.763,rs3798999,0.028  
6,83.808,rs3799039,0.024  
6,83.821,rs779484,0.022

6,83.839,rs13191298,0.022  
6,83.860,rs7762967,0.023  
6,83.867,rs2094596,0.028  
6,83.876,rs9342757,0.036  
6,83.897,rs7759294,0.046  
6,83.900,rs6930785,0.047  
6,83.921,rs1457498,0.050  
6,83.921,rs2305840,0.050  
6,83.925,rs13207318,0.050  
6,83.932,rs951494,0.053  
6,83.936,rs1934897,0.054  
6,83.947,rs9454921,0.056  
6,83.960,rs978291,0.058  
6,83.962,rs1156404,0.066  
6,83.962,rs3828767,0.068  
6,83.966,rs3805994,0.074  
6,84.019,rs495823,0.105  
6,84.093,rs9294863,0.137  
6,84.094,rs2242589,0.167  
6,84.218,rs13216351,0.082  
6,84.820,rs2691482,0.079  
6,85.209,rs2273566,0.104  
6,85.249,rs576516,0.107  
6,85.271,rs9784769,0.108  
6,85.272,rs639448,0.108  
6,85.276,rs7750238,0.104  
6,85.276,rs521116,0.104  
6,85.278,rs2474918,0.103  
6,85.310,rs6455394,0.091  
6,85.333,rs2748324,0.095  
6,85.338,rs16869719,0.094  
6,85.361,rs718356,0.104  
6,85.475,rs12200732,0.124  
6,85.503,rs4707902,0.128  
6,85.547,rs6914937,0.154  
6,85.702,rs765466,0.177  
6,85.736,rs852937,0.182  
6,85.796,rs182106,0.193  
6,85.866,rs9358960,0.218  
6,86.050,rs829472,0.241  
6,86.065,rs1999083,0.242  
6,86.069,rs1932327,0.242  
6,86.226,rs4707954,0.308  
6,86.255,rs1192250,0.296  
6,86.262,rs9341356,0.294  
6,86.324,rs9350450,0.267  
6,86.386,rs519470,0.272  
6,86.427,rs6919752,0.270  
6,86.830,rs2815736,0.276  
6,86.840,rs9442780,0.274  
6,86.846,rs2492970,0.274  
6,86.901,rs2781562,0.270  
6,87.062,rs1202109,0.309  
6,87.066,rs1147572,0.308  
6,87.078,rs12524568,0.318  
6,87.090,rs17692121,0.327  
6,87.118,rs7746067,0.342  
6,87.246,rs9293911,0.343  
6,87.301,rs16882900,0.336  
6,87.319,rs6928101,0.334  
6,87.321,rs1935515,0.333

6,87.365,rs9351948,0.338  
6,87.374,rs9446777,0.335  
6,87.421,rs10498886,0.333  
6,87.451,rs6916116,0.327  
6,87.453,rs1317537,0.328  
6,87.544,rs10943076,0.369  
6,87.621,rs12111515,0.404  
6,87.624,rs9343001,0.405  
6,87.631,rs6933440,0.406  
6,87.636,rs952880,0.412  
6,87.638,rs3778268,0.415  
6,87.641,rs9688792,0.414  
6,87.646,rs4708042,0.427  
6,87.654,rs526434,0.447  
6,87.675,rs583443,0.465  
6,87.680,rs687210,0.438  
6,87.684,rs2351127,0.423  
6,87.686,rs9442947,0.425  
6,87.689,rs9442951,0.425  
6,87.795,rs3012571,0.364  
6,88.048,rs9447104,0.379  
6,88.218,rs2951916,0.416  
6,88.260,rs9343298,0.415  
6,88.383,rs17792496,0.418  
6,88.384,rs3798461,0.418  
6,88.389,rs7766781,0.416  
6,88.445,rs3798451,0.391  
6,88.534,rs9343330,0.343  
6,88.567,rs12527817,0.333  
6,88.599,rs4708205,0.355  
6,88.647,rs1933479,0.365  
6,88.686,rs2029151,0.377  
6,88.749,rs6912202,0.348  
6,88.801,rs12111160,0.333  
6,88.967,rs4235898,0.406  
6,88.980,rs9343467,0.412  
6,89.027,rs2446094,0.396  
6,89.047,rs7750507,0.393  
6,89.050,rs1902852,0.394  
6,89.055,rs1457963,0.397  
6,89.062,rs6934358,0.401  
6,89.113,rs1457946,0.415  
6,89.142,rs13216684,0.411  
6,89.153,rs323260,0.410  
6,89.163,rs16888579,0.449  
6,89.163,rs2206819,0.449  
6,89.170,rs7747803,0.452  
6,89.172,rs9343581,0.452  
6,89.501,rs1777807,0.531  
6,89.532,rs9359267,0.538  
6,89.733,rs1824282,0.516  
6,89.782,rs1902970,0.509  
6,89.839,rs2504298,0.499  
6,89.971,rs7761742,0.480  
6,90.158,rs2174743,0.492  
6,90.214,rs1415862,0.520  
6,90.295,rs10484946,0.558  
6,90.325,rs10943623,0.585  
6,90.393,rs2184425,0.626  
6,90.414,rs4055090,0.638  
6,90.427,rs9294143,0.645

6,90.440,rs3846739,0.612  
6,90.452,rs2803191,0.575  
6,90.537,rs2812683,0.606  
6,90.582,rs6899814,0.592  
6,90.603,rs2038293,0.586  
6,90.606,rs12199053,0.585  
6,90.622,rs10806179,0.568  
6,90.624,rs1321847,0.563  
6,90.630,rs2145572,0.553  
6,90.635,rs9343946,0.554  
6,90.651,rs2164166,0.555  
6,90.676,rs10455125,0.600  
6,90.678,rs9448870,0.603  
6,90.679,rs17239632,0.606  
6,90.720,rs7453746,0.642  
6,90.798,rs806847,0.624  
6,90.862,rs9449017,0.612  
6,90.895,rs2444827,0.605  
6,91.084,rs310405,0.653  
6,91.194,rs1088022,0.650  
6,91.205,rs9344186,0.648  
6,91.232,rs16893209,0.642  
6,91.334,rs2181364,0.619  
6,91.423,rs9350935,0.658  
6,91.431,rs1144175,0.657  
6,91.440,rs6911841,0.658  
6,91.471,rs194933,0.663  
6,91.568,rs999567,0.662  
6,91.596,rs12663436,0.674  
6,91.611,rs1931646,0.691  
6,91.619,rs7450340,0.699  
6,91.703,rs6902034,0.761  
6,91.737,rs9449392,0.788  
6,91.742,rs7454792,0.789  
6,91.749,rs2039669,0.789  
6,91.785,rs11752161,0.792  
6,91.870,rs521805,0.783  
6,91.884,rs6916677,0.779  
6,92.042,rs4351310,0.735  
6,92.171,rs2253003,0.712  
6,92.213,rs6931603,0.712  
6,92.272,rs1040544,0.713  
6,92.279,rs1076710,0.710  
6,92.295,rs9294265,0.703  
6,92.359,rs16879723,0.674  
6,92.507,rs1180242,0.603  
6,92.580,rs13205856,0.696  
6,92.609,rs592188,0.735  
6,92.621,rs13211072,0.743  
6,92.702,rs215973,0.736  
6,92.769,rs2274092,0.783  
6,92.796,rs2324570,0.741  
6,92.809,rs9350994,0.736  
6,92.831,rs2023558,0.732  
6,92.839,rs713170,0.646  
6,92.842,rs9294298,0.608  
6,92.852,rs9362054,0.589  
6,92.866,rs9344403,0.589  
6,92.913,rs9450002,0.587  
6,92.919,rs2025866,0.582  
6,93.131,rs7741631,0.535

6,93.159,rs1884478,0.529  
6,93.253,rs9362119,0.526  
6,93.260,rs1325973,0.539  
6,93.261,rs1409191,0.539  
6,93.264,rs9450174,0.551  
6,93.265,rs1321737,0.557  
6,93.270,rs16875886,0.575  
6,93.273,rs1037163,0.583  
6,93.274,rs3903689,0.600  
6,93.277,rs313178,0.595  
6,93.278,rs4707190,0.591  
6,93.280,rs6454463,0.575  
6,93.284,rs9450273,0.631  
6,93.285,rs881795,0.641  
6,93.289,rs6900270,0.663  
6,93.295,rs3900740,0.675  
6,93.321,rs17443200,0.726  
6,93.333,rs220428,0.749  
6,93.336,rs6926588,0.702  
6,93.339,rs9359692,0.709  
6,93.340,rs3000069,0.710  
6,93.341,rs6935746,0.711  
6,93.346,rs13213204,0.716  
6,93.358,rs1948991,0.681  
6,93.370,rs1325183,0.683  
6,93.380,rs7751208,0.636  
6,93.387,rs10944288,0.605  
6,93.393,rs11961178,0.593  
6,93.411,rs6916994,0.554  
6,93.412,rs10498960,0.554  
6,93.434,rs13213285,0.552  
6,93.444,rs6454648,0.634  
6,93.445,rs7747510,0.637  
6,93.445,rs9294390,0.639  
6,93.446,rs722903,0.637  
6,93.447,rs2787897,0.634  
6,93.485,rs9362459,0.566  
6,93.494,rs12528790,0.561  
6,93.521,rs2509458,0.568  
6,93.524,rs2282519,0.569  
6,93.529,rs2509453,0.646  
6,93.543,rs543049,0.614  
6,93.576,rs366676,0.552  
6,93.649,rs806454,0.562  
6,93.686,rs806366,0.495  
6,93.698,rs6928813,0.488  
6,93.733,rs12213790,0.473  
6,93.737,rs9450917,0.476  
6,93.758,rs6927294,0.468  
6,93.793,rs1408702,0.423  
6,93.859,rs6938352,0.408  
6,93.878,rs990060,0.404  
6,93.887,rs9362494,0.401  
6,93.888,rs723787,0.401  
6,93.896,rs4707461,0.417  
6,93.963,rs6454694,0.421  
6,93.964,rs6931896,0.421  
6,93.969,rs11756329,0.425  
6,94.019,rs17492709,0.454  
6,94.029,rs964888,0.459  
6,94.033,rs2610763,0.459

6,94.035,rs2279083,0.459  
6,94.038,rs2875553,0.460  
6,94.067,rs9294406,0.488  
6,94.078,rs10085363,0.498  
6,94.182,rs6901395,0.513  
6,94.404,rs2207553,0.493  
6,94.440,rs6903926,0.494  
6,94.738,rs7775554,0.493  
6,94.934,rs282136,0.515  
6,94.940,rs9444678,0.517  
6,94.959,rs282123,0.567  
6,95.046,rs3777522,0.566  
6,95.058,rs3798256,0.565  
6,95.118,rs6454752,0.583  
6,95.169,rs9344925,0.654  
6,95.211,rs7760851,0.661  
6,95.282,rs16881774,0.680  
6,95.534,rs854865,0.651  
6,95.877,rs9362662,0.640  
6,96.466,rs12212017,0.683  
6,96.610,rs369328,0.693  
6,96.722,rs292240,0.697  
6,96.766,rs9451295,0.700  
6,96.784,rs9351229,0.702  
6,96.844,rs3734662,0.761  
6,96.849,rs9362704,0.716  
6,96.908,rs16882302,0.678  
6,96.915,rs6454789,0.673  
6,96.931,rs11969265,0.641  
6,96.933,rs6910129,0.634  
6,96.972,rs7761142,0.599  
6,96.998,rs4707586,0.539  
6,97.083,rs6931936,0.566  
6,97.188,rs6932747,0.611  
6,97.269,rs990482,0.640  
6,97.522,rs2501720,0.742  
6,97.558,rs12209546,0.748  
6,97.633,rs206912,0.738  
6,97.850,rs12195431,0.735  
6,97.905,rs285630,0.707  
6,97.958,rs285616,0.683  
6,98.032,rs790595,0.709  
6,98.048,rs790584,0.661  
6,98.049,rs1868834,0.658  
6,98.131,rs9451413,0.720  
6,98.133,rs7745771,0.722  
6,98.365,rs284509,0.793  
6,98.392,rs157695,0.736  
6,98.395,rs205353,0.736  
6,98.540,rs10498970,0.736  
6,98.597,rs1884839,0.754  
6,98.617,rs9345044,0.753  
6,98.688,rs2141484,0.727  
6,98.717,rs9451486,0.729  
6,98.717,rs10485409,0.729  
6,98.719,rs16883560,0.730  
6,98.775,rs6913163,0.745  
6,98.813,rs1145778,0.710  
6,98.826,rs1145787,0.688  
6,98.857,rs1220445,0.651  
6,98.897,rs1144171,0.533



6,98.924,rs12211003,0.493  
6,98.996,rs9362825,0.401  
6,99.052,rs4707657,0.359  
6,99.089,rs4445032,0.312  
6,99.191,rs2748276,0.289  
6,99.216,rs2144363,0.303  
6,99.297,rs2748285,0.349  
6,99.463,rs4112305,0.413  
6,99.511,rs16884625,0.413  
6,99.689,rs4318847,0.395  
6,99.710,rs1498260,0.393  
6,99.781,rs11756114,0.359  
6,99.782,rs2249818,0.358  
6,99.787,rs9362948,0.360  
6,99.788,rs4502906,0.360  
6,99.792,rs9362961,0.370  
6,99.793,rs13204161,0.372  
6,99.823,rs878519,0.345  
6,99.834,rs7740559,0.334  
6,99.847,rs6935299,0.367  
6,99.953,rs6918777,0.361  
6,99.976,rs17654546,0.359  
6,100.004,rs6908465,0.324  
6,100.141,rs1338263,0.337  
6,100.146,rs6923057,0.337  
6,100.173,rs655096,0.338  
6,100.193,rs652520,0.337  
6,100.207,rs1590392,0.383  
6,100.229,rs576798,0.387  
6,100.285,rs2147222,0.365  
6,100.294,rs9445080,0.367  
6,100.310,rs4288174,0.365  
6,100.338,rs631175,0.364  
6,100.353,rs1572102,0.359  
6,100.413,rs164301,0.335  
6,100.421,rs16871170,0.333  
6,100.468,rs564158,0.322  
6,100.477,rs2278107,0.319  
6,100.500,rs682230,0.311  
6,100.507,rs1906969,0.310  
6,100.543,rs7757023,0.300  
6,100.593,rs9363108,0.279  
6,100.644,rs1937359,0.258  
6,100.676,rs2029322,0.246  
6,100.679,rs1352380,0.276  
6,100.725,rs525413,0.298  
6,100.760,rs12216311,0.315  
6,100.784,rs2021314,0.316  
6,100.831,rs7763538,0.308  
6,100.845,rs386272,0.304  
6,100.855,rs385368,0.301  
6,100.894,rs390661,0.263  
6,100.909,rs1033581,0.255  
6,100.930,rs9294602,0.243  
6,101.022,rs4299796,0.200  
6,101.092,rs9452884,0.196  
6,101.104,rs2502037,0.196  
6,101.454,rs9360079,0.141  
6,101.498,rs12663902,0.144  
6,101.561,rs7749777,0.144  
6,101.594,rs4839952,0.151

6,101.609,rs4839992,0.144  
6,101.626,rs6899560,0.149  
6,101.628,rs6570428,0.150  
6,101.630,rs10499006,0.152  
6,101.643,rs17055669,0.161  
6,101.644,rs12190516,0.162  
6,101.648,rs526939,0.165  
6,101.649,rs489849,0.165  
6,101.660,rs17055848,0.165  
6,101.661,rs612612,0.165  
6,101.669,rs9322615,0.172  
6,101.685,rs7768089,0.224  
6,101.699,rs12661236,0.222  
6,101.760,rs6934392,0.237  
6,101.880,rs927271,0.226  
6,101.897,rs7761211,0.188  
6,101.898,rs1334328,0.186  
6,101.933,rs13218880,0.152  
6,101.937,rs933042,0.148  
6,101.939,rs7746875,0.170  
6,102.007,rs2206573,0.142  
6,102.034,rs9487151,0.139  
6,102.113,rs12528971,0.112  
6,102.127,rs6568649,0.109  
6,102.154,rs4839882,0.102  
6,102.170,rs1359931,0.116  
6,102.198,rs7762923,0.119  
6,102.324,rs1997933,0.122  
6,102.328,rs1206131,0.122  
6,102.351,rs1206147,0.143  
6,102.428,rs1474620,0.154  
6,102.732,rs7775139,0.105  
6,102.824,rs7765980,0.111  
6,102.880,rs7757567,0.104  
6,102.881,rs9320672,0.103  
6,102.902,rs12527293,0.098  
6,102.907,rs600613,0.097  
6,102.989,rs6922758,0.084  
6,103.034,rs6940021,0.075  
6,103.314,rs6940828,0.056  
6,103.365,rs7767825,0.048  
6,103.408,rs9321063,0.037  
6,103.414,rs9388482,0.037  
6,103.447,rs158777,0.043  
6,103.458,rs11961327,0.041  
6,103.596,rs4406241,0.025  
6,103.603,rs7762570,0.025  
6,103.617,rs9402154,0.038  
6,103.740,rs2747734,0.030  
6,103.781,rs9493282,0.027  
6,103.793,rs9375894,0.028  
6,103.825,rs12111251,0.028  
6,103.848,rs12206927,0.029  
6,103.878,rs17059246,0.024  
6,103.880,rs4458696,0.024  
6,103.884,rs2132683,0.025  
6,103.889,rs9402564,0.025  
6,103.919,rs6933093,0.030  
6,103.950,rs17059400,0.026  
6,103.951,rs4144165,0.026  
6,104.025,rs543967,0.029

6,104.107,rs6908196,0.024  
6,104.118,rs10485227,0.023  
6,104.129,rs9376435,0.023  
6,104.137,rs7763983,0.024  
6,104.186,rs9403208,0.030  
6,104.250,rs3890820,0.038  
6,104.258,rs6903499,0.039  
6,104.271,rs6910833,0.037  
6,104.275,rs17060130,0.035  
6,104.307,rs6916538,0.021  
6,104.311,rs761711,0.029  
6,104.373,rs9399482,0.015  
6,104.447,rs1506084,0.009  
6,104.462,rs453530,0.009  
6,104.875,rs7740783,0.003  
6,105.038,rs17061291,0.001  
6,105.136,rs1338162,0.000  
6,105.147,rs1890276,0.000  
6,105.151,rs1465169,0.000  
6,105.241,rs3808,0.000  
6,105.302,rs2023169,0.000  
6,105.408,rs611348,-0.002  
6,105.428,rs512051,-0.001  
6,105.591,rs9485530,-0.000  
6,105.846,rs9498687,-0.000  
6,106.028,rs1417182,-0.000  
6,106.035,rs9485557,-0.000  
6,106.085,rs988376,-0.000  
6,106.104,rs2852605,-0.000  
6,106.149,rs9498821,-0.000  
6,106.231,rs13190906,0.000  
6,106.259,rs3849205,0.000  
6,106.280,rs9498961,0.000  
6,106.283,rs7750307,0.000  
6,106.284,rs6909610,0.001  
6,106.292,rs11156175,0.001  
6,106.379,rs7752919,0.010  
6,106.393,rs9322668,0.009  
6,106.457,rs1431218,0.005  
6,106.505,rs763231,0.002  
6,106.620,rs4945830,-0.001  
6,106.659,rs9377478,-0.000  
6,106.702,rs9391023,-0.001  
6,106.713,rs2506721,-0.002  
6,106.782,rs9399841,-0.006  
6,106.813,rs9386386,-0.005  
6,106.854,rs9373729,-0.009  
6,106.859,rs4610597,-0.011  
6,106.888,rs9485899,-0.020  
6,106.900,rs4639362,-0.025  
6,106.910,rs7774633,-0.019  
6,106.925,rs4489183,-0.022  
6,106.943,rs9377585,-0.025  
6,106.963,rs4357170,-0.027  
6,107.005,rs6906370,-0.050  
6,107.013,rs12110847,-0.050  
6,107.014,rs9386402,-0.050  
6,107.024,rs9322793,-0.039  
6,107.110,rs2744183,-0.032  
6,107.166,rs156149,-0.031  
6,107.265,rs94802,-0.021

6,107.536,rs4079063,-0.035  
6,107.645,rs12194974,-0.021  
6,107.677,rs369065,-0.020  
6,107.713,rs7750532,-0.019  
6,107.757,rs1890227,-0.014  
6,107.779,rs17524448,-0.012  
6,107.789,rs9404605,-0.010  
6,107.839,rs1765924,-0.007  
6,107.866,rs947213,-0.006  
6,107.883,rs1189924,-0.005  
6,107.928,rs1149319,-0.004  
6,107.996,rs6910880,-0.002  
6,108.031,rs9486097,-0.003  
6,108.036,rs7765899,-0.003  
6,108.045,rs12196063,-0.003  
6,108.080,rs1269287,-0.005  
6,108.103,rs4946669,-0.004  
6,108.109,rs9373790,-0.004  
6,108.125,rs6925857,-0.004  
6,108.146,rs7752220,-0.005  
6,108.147,rs9386458,-0.005  
6,108.164,rs2859307,-0.000  
6,108.166,rs1041914,-0.002  
6,108.210,rs6568387,-0.000  
6,108.361,rs1948999,-0.003  
6,108.447,rs1876560,-0.005  
6,108.479,rs7738222,-0.007  
6,108.482,rs1007664,-0.007  
6,108.547,rs6917664,-0.009  
6,108.560,rs11966261,-0.018  
6,108.589,rs9372110,-0.018  
6,108.594,rs9486210,-0.017  
6,108.652,rs4946705,-0.002  
6,108.674,rs4945734,-0.001  
6,108.694,rs6933284,-0.001  
6,108.753,rs6926851,-0.000  
6,108.771,rs9373821,-0.000  
6,108.813,rs4945738,-0.000  
6,108.983,rs4555967,-0.003  
6,109.100,rs693612,-0.003  
6,109.142,rs6901662,-0.003  
6,109.190,rs4946730,-0.005  
6,109.255,rs710090,-0.007  
6,109.436,rs633724,-0.013  
6,109.616,rs710092,-0.020  
6,109.618,rs3851212,-0.020  
6,109.652,rs2353594,-0.022  
6,109.697,rs11152984,-0.022  
6,109.711,rs1340611,-0.021  
6,109.751,rs879826,-0.020  
6,109.759,rs6908605,-0.022  
6,109.801,rs6905896,-0.031  
6,109.833,rs744899,-0.022  
6,109.865,rs9480678,-0.015  
6,109.889,rs1417356,-0.011  
6,109.938,rs6929649,-0.013  
6,109.941,rs1462147,-0.013  
6,110.178,rs12333016,-0.021  
6,110.186,rs6910496,-0.013  
6,110.252,rs9386579,-0.010  
6,110.260,rs3104037,-0.010

6,110.305,rs2748289,-0.009  
6,110.370,rs9480705,-0.007  
6,110.383,rs3117389,-0.006  
6,110.435,rs6920626,-0.004  
6,110.457,rs7775079,-0.003  
6,110.480,rs3127646,-0.009  
6,110.518,rs4946795,-0.025  
6,110.606,rs12197404,-0.059  
6,110.614,rs1900601,-0.060  
6,110.729,rs9400081,-0.060  
6,110.742,rs1762703,-0.072  
6,110.830,rs4946810,-0.076  
6,110.890,rs9400094,-0.076  
6,110.954,rs11759792,-0.084  
6,111.509,rs319107,-0.075  
6,111.657,rs6936145,-0.065  
6,111.730,rs9373951,-0.061  
6,111.733,rs3924727,-0.061  
6,111.737,rs2914,-0.062  
6,111.738,rs699696,-0.075  
6,111.804,rs1401171,-0.075  
6,111.977,rs2244924,-0.075  
6,112.001,rs12204951,-0.076  
6,112.013,rs9384666,-0.075  
6,112.025,rs9372175,-0.073  
6,112.047,rs11153096,-0.088  
6,112.095,rs17069204,-0.130  
6,112.154,rs7769514,-0.157  
6,112.183,rs12180499,-0.184  
6,112.225,rs218291,-0.261  
6,112.229,rs12173906,-0.263  
6,112.270,rs217528,-0.314  
6,112.369,rs635051,-0.318  
6,112.764,rs9480861,-0.295  
6,112.766,rs9374035,-0.295  
6,112.788,rs9372187,-0.291  
6,112.990,rs517924,-0.265  
6,113.003,rs6913023,-0.254  
6,113.005,rs9486931,-0.226  
6,113.035,rs520324,-0.208  
6,113.064,rs1146229,-0.183  
6,113.114,rs9486961,-0.179  
6,113.148,rs1268055,-0.178  
6,113.187,rs2806371,-0.172  
6,113.243,rs2806358,-0.168  
6,113.329,rs2883970,-0.165  
6,113.385,rs10046283,-0.181  
6,113.493,rs191611,-0.207  
6,113.565,rs13210693,-0.221  
6,113.741,rs4946977,-0.271  
6,113.810,rs1321207,-0.285  
6,114.073,rs10499054,-0.308  
6,114.104,rs4546525,-0.311  
6,114.189,rs6903208,-0.348  
6,114.198,rs4557564,-0.345  
6,114.212,rs4947035,-0.355  
6,114.230,rs9487258,-0.373  
6,114.268,rs4354185,-0.309  
6,114.453,rs12191724,-0.279  
6,114.621,rs761586,-0.248  
6,114.626,rs976471,-0.240

6,114.632,rs11963809,-0.237  
6,114.657,rs9374165,-0.234  
6,114.699,rs9487396,-0.212  
6,114.700,rs9384741,-0.211  
6,114.717,rs17578180,-0.225  
6,114.718,rs9481067,-0.224  
6,114.759,rs2428190,-0.197  
6,114.813,rs1989634,-0.159  
6,114.819,rs2817782,-0.157  
6,114.878,rs13197089,-0.160  
6,115.103,rs3749866,-0.110  
6,115.228,rs781499,-0.095  
6,115.342,rs3851222,-0.095  
6,115.362,rs9386996,-0.112  
6,115.827,rs11755082,-0.096  
6,115.907,rs2235175,-0.099  
6,116.009,rs6919400,-0.127  
6,116.064,rs706895,-0.105  
6,116.118,rs2213842,-0.101  
6,116.165,rs2072026,-0.120  
6,116.195,rs971402,-0.153  
6,116.334,rs9487875,-0.150  
6,116.352,rs12195540,-0.152  
6,116.429,rs6933749,-0.163  
6,116.436,rs9400534,-0.174  
6,116.462,rs4947185,-0.170  
6,116.604,rs1276628,-0.144  
6,116.737,rs6926282,-0.136  
6,116.826,rs12526710,-0.130  
6,116.887,rs9374352,-0.126  
6,116.890,rs9384838,-0.126  
6,117.051,rs4947202,-0.121  
6,117.096,rs9384847,-0.119  
6,117.148,rs1542581,-0.116  
6,117.268,rs1774053,-0.142  
6,117.386,rs7773871,-0.182  
6,117.445,rs774410,-0.159  
6,117.458,rs9488123,-0.158  
6,117.511,rs2637534,-0.157  
6,117.530,rs9320443,-0.178  
6,117.535,rs509687,-0.175  
6,117.579,rs2049923,-0.164  
6,117.580,rs7751070,-0.165  
6,117.596,rs4945955,-0.138  
6,117.617,rs6939843,-0.133  
6,117.668,rs2030926,-0.153  
6,117.679,rs6907551,-0.155  
6,117.688,rs2615519,-0.151  
6,117.731,rs352074,-0.068  
6,117.735,rs352098,-0.062  
6,117.750,rs9481408,-0.033  
6,117.751,rs9320485,-0.028  
6,117.754,rs1323056,-0.018  
6,117.757,rs6568842,-0.020  
6,117.760,rs3003879,-0.022  
6,117.761,rs7752198,-0.031  
6,117.765,rs9372417,-0.032  
6,118.037,rs1997858,-0.013  
6,118.073,rs1556614,-0.008  
6,118.098,rs6916017,-0.004  
6,118.116,rs515413,-0.003

6,118.246,rs958738,0.000  
6,118.334,rs17077867,0.009  
6,118.341,rs9488914,0.010  
6,118.347,rs3778002,0.011  
6,118.366,rs508521,0.013  
6,118.383,rs2637679,0.014  
6,118.544,rs636252,0.029  
6,118.589,rs9320588,0.033  
6,118.643,rs1577244,0.033  
6,118.667,rs783373,0.034  
6,118.720,rs620590,0.029  
6,118.736,rs441184,0.018  
6,118.741,rs2778,0.024  
6,118.745,rs485768,0.025  
6,118.751,rs3777958,0.027  
6,118.757,rs508278,0.027  
6,118.767,rs2157535,0.028  
6,118.792,rs765516,0.030  
6,118.829,rs1321811,0.019  
6,118.848,rs4946263,0.027  
6,118.891,rs4946273,0.029  
6,118.910,rs12530278,0.039  
6,118.911,rs9767278,0.040  
6,118.913,rs11751090,0.041  
6,118.921,rs1541317,0.046  
6,118.932,rs11755703,0.045  
6,118.957,rs667994,0.053  
6,118.960,rs7754471,0.054  
6,118.970,rs9481736,0.053  
6,119.042,rs9320622,0.043  
6,119.100,rs2105019,0.040  
6,119.111,rs2152076,0.040  
6,119.309,rs13220480,0.010  
6,119.363,rs9481852,0.006  
6,119.385,rs9489522,0.005  
6,119.491,rs1889561,0.001  
6,119.523,rs7749394,0.000  
6,119.538,rs676491,0.001  
6,119.541,rs9320680,0.001  
6,119.550,rs4140634,0.001  
6,119.651,rs9320690,0.001  
6,119.701,rs4551205,0.001  
6,119.751,rs12212125,0.001  
6,119.819,rs7776137,0.002  
6,119.838,rs1933873,0.013  
6,119.840,rs2358048,0.014  
6,119.872,rs9490054,0.014  
6,120.041,rs7745023,0.019  
6,120.124,rs17083553,0.021  
6,120.131,rs17083598,0.023  
6,120.155,rs6932373,0.038  
6,120.210,rs4946578,0.045  
6,120.226,rs4523118,0.062  
6,120.656,rs13210237,0.066  
6,120.669,rs10499116,0.067  
6,120.705,rs2684257,0.067  
6,121.204,rs7751410,0.064  
6,121.309,rs1741820,0.065  
6,121.667,rs13191198,0.079  
6,121.833,rs4382328,0.114  
6,121.881,rs17084798,0.134

6,121.895,rs12204690,0.140  
6,121.926,rs9388133,0.131  
6,121.946,rs936806,0.122  
6,121.949,rs1485649,0.121  
6,122.000,rs9375185,0.118  
6,122.010,rs2046446,0.117  
6,122.023,rs9375186,0.117  
6,122.094,rs4962262,0.127  
6,122.135,rs9401605,0.158  
6,122.181,rs9490584,0.169  
6,122.222,rs7453004,0.168  
6,122.428,rs7774522,0.122  
6,122.588,rs9490673,0.113  
6,122.833,rs12206156,0.107  
6,123.214,rs4897255,0.075  
6,123.306,rs6905496,0.064  
6,123.340,rs1998262,0.053  
6,123.347,rs1407220,0.062  
6,123.365,rs1321084,0.064  
6,123.391,rs1590246,0.061  
6,123.404,rs7760343,0.075  
6,123.516,rs9482421,0.058  
6,123.701,rs3861460,0.062  
6,123.786,rs9490950,0.073  
6,123.802,rs9490959,0.073  
6,123.807,rs9375285,0.073  
6,123.884,rs9388287,0.076  
6,123.886,rs7764708,0.076  
6,124.033,rs1267992,0.090  
6,124.084,rs7742884,0.086  
6,124.114,rs9320971,0.115  
6,124.130,rs6935830,0.135  
6,124.153,rs234481,0.129  
6,124.163,rs234478,0.123  
6,124.217,rs1858234,0.108  
6,124.225,rs9320975,0.108  
6,124.227,rs17086577,0.108  
6,124.338,rs163286,0.104  
6,124.529,rs2689887,0.076  
6,124.594,rs2753147,0.042  
6,124.597,rs802500,0.030  
6,124.636,rs802504,0.029  
6,124.643,rs12214721,0.029  
6,124.745,rs4510696,0.020  
6,124.756,rs7751845,0.019  
6,124.822,rs523240,0.021  
6,124.993,rs1842129,0.017  
6,125.020,rs7773205,0.026  
6,125.070,rs527307,0.029  
6,125.142,rs1382647,0.022  
6,125.161,rs10499129,0.020  
6,125.190,rs504008,0.018  
6,125.242,rs1677933,0.016  
6,125.340,rs17767102,0.011  
6,125.424,rs7754584,0.006  
6,125.469,rs9401773,0.001  
6,125.520,rs6569399,-0.002  
6,125.524,rs579493,-0.000  
6,125.577,rs476436,-0.003  
6,125.793,rs9491388,-0.004  
6,125.795,rs17053052,-0.004



6,125.842,rs9482645,-0.003  
6,125.856,rs7756600,-0.003  
6,126.012,rs4895745,-0.002  
6,126.038,rs6923813,-0.001  
6,126.170,rs11964411,-0.000  
6,126.570,rs6919947,0.008  
6,126.652,rs9398792,0.011  
6,127.124,rs1378579,0.049  
6,127.332,rs1034207,0.082  
6,127.376,rs4644087,0.089  
6,127.377,rs13202608,0.089  
6,127.449,rs9401955,0.070  
6,127.480,rs7776028,0.067  
6,127.507,rs2121881,0.064  
6,127.541,rs17299841,0.065  
6,127.542,rs498692,0.065  
6,127.561,rs12661098,0.069  
6,127.574,rs920992,0.072  
6,127.621,rs802726,0.078  
6,127.630,rs9375543,0.061  
6,127.640,rs7776358,0.047  
6,127.658,rs17828130,0.046  
6,127.672,rs4498385,0.047  
6,127.716,rs6923988,0.049  
6,127.722,rs17352289,0.050  
6,127.788,rs1891150,0.052  
6,127.818,rs9491960,0.054  
6,127.859,rs1016015,0.056  
6,127.979,rs9402050,0.069  
6,128.139,rs12208509,0.088  
6,128.173,rs471145,0.091  
6,128.322,rs4487603,0.095  
6,128.462,rs9375609,0.103  
6,128.479,rs11154461,0.106  
6,128.560,rs12664291,0.102  
6,128.627,rs10447440,0.098  
6,128.628,rs265365,0.098  
6,128.656,rs2448011,0.108  
6,128.663,rs265371,0.110  
6,128.679,rs12208401,0.114  
6,128.691,rs2306942,0.114  
6,128.764,rs2437090,0.113  
6,128.786,rs4143750,0.115  
6,128.942,rs9375634,0.104  
6,128.958,rs2571588,0.099  
6,129.023,rs9321174,0.084  
6,129.076,rs10499163,0.076  
6,129.153,rs2051632,0.063  
6,129.186,rs1023480,0.059  
6,129.216,rs7768656,0.053  
6,129.244,rs7753327,0.050  
6,129.262,rs376632,0.040  
6,129.270,rs208869,0.035  
6,129.322,rs17057836,0.040  
6,129.326,rs6905254,0.041  
6,129.349,rs6931600,0.039  
6,129.428,rs1480521,0.031  
6,129.544,rs9492408,0.020  
6,129.652,rs7759830,0.012  
6,129.657,rs9398929,0.012  
6,129.737,rs11757973,0.007

6,129.814,rs4897358,0.004  
6,129.871,rs6569647,0.004  
6,129.926,rs6928313,0.009  
6,129.950,rs4327721,0.009  
6,129.987,rs3777428,0.009  
6,130.022,rs9402219,0.008  
6,130.024,rs7749850,0.004  
6,130.044,rs4897377,0.004  
6,130.074,rs962011,0.004  
6,130.219,rs17059090,0.000  
6,130.224,rs9492602,0.000  
6,130.244,rs2876086,-0.000  
6,130.254,rs17059166,-0.001  
6,130.282,rs9398947,-0.001  
6,130.285,rs6914156,-0.001  
6,130.298,rs1316537,-0.001  
6,130.317,rs4144213,-0.001  
6,130.318,rs9388813,-0.001  
6,130.349,rs9492683,-0.000  
6,130.405,rs4897451,-0.002  
6,130.443,rs2326985,-0.002  
6,130.492,rs9402292,-0.001  
6,130.587,rs9321265,-0.001  
6,130.655,rs516473,-0.001  
6,130.656,rs1746477,-0.001  
6,130.661,rs497082,-0.015  
6,130.665,rs1886073,-0.018  
6,130.691,rs10484765,-0.011  
6,130.707,rs4897509,-0.015  
6,130.716,rs2031205,-0.015  
6,130.869,rs2749928,-0.011  
6,130.936,rs365475,-0.023  
6,130.938,rs9493099,-0.023  
6,130.939,rs2021966,-0.023  
6,130.994,rs1029122,-0.016  
6,131.160,rs1321267,-0.018  
6,131.172,rs728371,-0.017  
6,131.216,rs17061077,-0.015  
6,131.244,rs1406937,-0.013  
6,131.280,rs4897574,-0.010  
6,131.305,rs6909136,-0.009  
6,131.371,rs7745230,-0.010  
6,131.431,rs9385608,-0.017  
6,131.437,rs10499186,-0.018  
6,131.482,rs13205427,-0.025  
6,131.507,rs2842889,-0.032  
6,131.517,rs7758170,-0.035  
6,131.566,rs2153174,-0.048  
6,131.596,rs1361281,-0.050  
6,131.607,rs8192624,-0.051  
6,131.641,rs4305747,-0.055  
6,131.656,rs12200377,-0.056  
6,131.660,rs1081076,-0.057  
6,131.720,rs1569651,-0.063  
6,131.800,rs2294757,-0.047  
6,131.802,rs3756975,-0.062  
6,132.008,rs1408064,-0.019  
6,132.076,rs17062051,-0.006  
6,132.090,rs4571580,-0.005  
6,132.130,rs1338012,-0.004  
6,132.151,rs12524250,-0.003

6,132.154,rs745091,-0.003  
6,132.160,rs7766140,-0.003  
6,132.164,rs159407,-0.003  
6,132.174,rs9385647,-0.002  
6,132.190,rs3777878,-0.000  
6,132.196,rs3734279,-0.000  
6,132.199,rs9493636,-0.000  
6,132.228,rs9375980,-0.000  
6,132.237,rs10457611,-0.000  
6,132.697,rs2209044,-0.001  
6,132.901,rs969282,-0.007  
6,132.915,rs2327430,-0.006  
6,133.132,rs9373073,-0.005  
6,133.340,rs2811679,-0.007  
6,133.358,rs965652,-0.008  
6,133.403,rs2627229,-0.002  
6,133.493,rs6908581,-0.001  
6,133.572,rs4243446,-0.002  
6,133.700,rs2811690,-0.001  
6,133.874,rs1763527,-0.000  
6,134.191,rs1763510,0.001  
6,134.560,rs9493891,0.000  
6,134.770,rs379977,0.000  
6,134.901,rs9493917,-0.000  
6,134.940,rs9402592,-0.001  
6,134.947,rs736476,-0.001  
6,134.949,rs6569943,-0.001  
6,134.958,rs9373094,-0.001  
6,134.988,rs2295199,-0.003  
6,135.023,rs2144219,-0.005  
6,135.072,rs13199020,-0.006  
6,135.075,rs7739403,-0.006  
6,135.178,rs7747509,-0.006  
6,135.205,rs7757871,-0.006  
6,135.228,rs1407107,-0.005  
6,135.289,rs9483751,-0.006  
6,135.297,rs9402653,-0.005  
6,135.465,rs1014021,-0.001  
6,135.628,rs3819409,-0.000  
6,135.663,rs4896134,0.001  
6,135.805,rs17778438,0.005  
6,135.923,rs9402717,0.006  
6,136.203,rs6570048,0.009  
6,136.212,rs7767574,0.009  
6,136.223,rs9494412,0.011  
6,136.259,rs2876317,0.010  
6,136.412,rs13212385,0.024  
6,136.418,rs7747433,0.023  
6,136.422,rs6921041,0.023  
6,136.518,rs7770239,0.020  
6,136.824,rs9494473,0.011  
6,136.877,rs9494492,0.010  
6,137.026,rs7746031,0.010  
6,137.090,rs6931974,0.010  
6,137.483,rs2181096,0.016  
6,137.600,rs13191834,0.020  
6,137.777,rs9389413,0.034  
6,137.839,rs6917580,0.038  
6,137.870,rs9402838,0.045  
6,137.888,rs6914406,0.045  
6,137.911,rs3765259,0.044

6,137.923,rs9402839,0.044  
6,138.017,rs911182,0.049  
6,138.450,rs17065704,0.031  
6,138.578,rs7743308,0.034  
6,138.587,rs6928748,0.034  
6,138.642,rs10872465,0.037  
6,138.714,rs1744061,0.038  
6,138.884,rs276550,0.028  
6,138.957,rs10484796,0.022  
6,139.032,rs10484798,0.044  
6,139.049,rs9494674,0.046  
6,139.127,rs4896243,0.067  
6,139.165,rs9376268,0.070  
6,139.168,rs12204754,0.073  
6,139.194,rs12529779,0.098  
6,139.196,rs608914,0.100  
6,139.224,rs673156,0.113  
6,139.271,rs2807897,0.112  
6,139.321,rs9321590,0.111  
6,139.325,rs7769903,0.126  
6,139.331,rs9321591,0.123  
6,139.376,rs7747814,0.091  
6,139.447,rs3914898,0.106  
6,139.600,rs737467,0.127  
6,139.670,rs7773301,0.139  
6,139.752,rs1000041,0.144  
6,139.799,rs1000738,0.147  
6,139.871,rs203698,0.150  
6,139.931,rs662100,0.149  
6,140.010,rs9494831,0.151  
6,140.017,rs6917072,0.151  
6,140.062,rs473892,0.153  
6,140.207,rs10499195,0.168  
6,140.320,rs999638,0.183  
6,140.476,rs6923167,0.204  
6,140.644,rs9321634,0.224  
6,140.736,rs6941603,0.252  
6,140.772,rs4388301,0.263  
6,140.819,rs7768419,0.229  
6,140.820,rs11154954,0.228  
6,140.885,rs9376314,0.227  
6,140.892,rs6570205,0.225  
6,141.006,rs9321647,0.230  
6,141.187,rs7774240,0.315  
6,141.194,rs1883468,0.316  
6,141.199,rs9385824,0.281  
6,141.205,rs1474664,0.282  
6,141.298,rs1509683,0.274  
6,141.521,rs9376339,0.327  
6,141.729,rs203139,0.347  
6,141.913,rs10499200,0.380  
6,142.000,rs6937832,0.394  
6,142.012,rs7741143,0.394  
6,142.034,rs12527125,0.439  
6,142.036,rs9389585,0.443  
6,142.121,rs3923724,0.528  
6,142.333,rs6928475,0.493  
6,142.359,rs6940013,0.489  
6,142.485,rs9376361,0.467  
6,142.526,rs4598095,0.464  
6,142.719,rs6927344,0.436

6,142.774,rs722653,0.417  
6,142.841,rs9403008,0.408  
6,142.878,rs9399258,0.411  
6,142.948,rs1188854,0.419  
6,142.949,rs6937315,0.419  
6,142.969,rs17067985,0.417  
6,143.297,rs9399268,0.367  
6,143.352,rs2504377,0.363  
6,143.488,rs9403037,0.343  
6,143.590,rs3777677,0.362  
6,143.595,rs6927712,0.320  
6,143.628,rs11155065,0.291  
6,143.670,rs10085329,0.268  
6,143.679,rs3010311,0.269  
6,143.862,rs9495497,0.270  
6,143.881,rs9376422,0.270  
6,144.062,rs9389694,0.220  
6,144.148,rs7750201,0.239  
6,144.247,rs9495538,0.239  
6,144.526,rs6904272,0.251  
6,144.728,rs1408295,0.270  
6,144.779,rs9376523,0.274  
6,144.810,rs582203,0.279  
6,144.815,rs672033,0.277  
6,144.822,rs9389870,0.275  
6,144.972,rs11962370,0.204  
6,144.998,rs9376624,0.192  
6,145.069,rs1415909,0.164  
6,145.095,rs9321832,0.154  
6,145.096,rs9496126,0.152  
6,145.107,rs6913823,0.132  
6,145.165,rs7753254,0.142  
6,145.195,rs7758295,0.143  
6,145.259,rs17054023,0.151  
6,145.276,rs4596499,0.154  
6,145.321,rs9376669,0.163  
6,145.447,rs7765914,0.162  
6,145.464,rs1953319,0.158  
6,145.501,rs9389983,0.160  
6,145.702,rs263156,0.093  
6,145.724,rs17071903,0.096  
6,145.731,rs12191946,0.096  
6,145.750,rs9403404,0.096  
6,145.932,rs12525269,0.101  
6,146.001,rs765875,0.087  
6,146.010,rs198683,0.085  
6,146.023,rs9496475,0.085  
6,146.029,rs9403421,0.087  
6,146.059,rs13203900,0.098  
6,146.089,rs9496500,0.059  
6,146.092,rs9496502,0.071  
6,146.094,rs199248,0.076  
6,146.097,rs9321886,0.076  
6,146.158,rs7738387,0.073  
6,146.185,rs6908441,0.070  
6,146.204,rs9403460,0.068  
6,146.208,rs7772833,0.067  
6,146.269,rs9496563,0.074  
6,146.325,rs223607,0.081  
6,146.334,rs7757142,0.083  
6,146.335,rs223588,0.083

6,146.339,rs909842,0.084  
6,146.362,rs6929191,0.072  
6,146.381,rs161064,0.076  
6,146.458,rs9496698,0.090  
6,146.465,rs9496703,0.089  
6,146.475,rs10484805,0.088  
6,146.515,rs9496751,0.085  
6,146.516,rs1015341,0.084  
6,146.524,rs9386046,0.077  
6,146.532,rs11962678,0.060  
6,146.537,rs6931825,0.050  
6,146.545,rs2295202,0.049  
6,146.567,rs9390143,0.050  
6,146.591,rs11155329,0.061  
6,146.600,rs4896684,0.062  
6,146.609,rs9496805,0.057  
6,146.631,rs6930726,0.059  
6,146.642,rs2273323,0.055  
6,146.688,rs2328542,0.037  
6,146.720,rs7760281,0.040  
6,146.724,rs6570608,0.030  
6,146.745,rs4896703,0.033  
6,146.774,rs7767952,0.049  
6,146.865,rs9321974,0.045  
6,146.881,rs4895643,0.050  
6,146.885,rs4473877,0.051  
6,146.985,rs4896735,0.050  
6,147.076,rs10499238,0.045  
6,147.079,rs9376865,0.045  
6,147.093,rs6931349,0.032  
6,147.114,rs7769065,0.032  
6,147.135,rs17819123,0.033  
6,147.137,rs1953793,0.033  
6,147.182,rs13199258,0.033  
6,147.209,rs649933,0.034  
6,147.237,rs7757238,0.023  
6,147.256,rs10484702,0.017  
6,147.285,rs566661,0.013  
6,147.300,rs13191080,0.014  
6,147.379,rs12524615,0.017  
6,147.457,rs951143,0.022  
6,147.576,rs9497474,0.019  
6,147.734,rs362845,0.017  
6,147.736,rs362848,0.017  
6,147.777,rs362856,0.015  
6,147.815,rs2942,0.013  
6,147.918,rs1575376,0.004  
6,148.035,rs4129313,0.000  
6,148.041,rs6905055,0.000  
6,148.143,rs259417,-0.000  
6,148.156,rs259404,-0.000  
6,148.267,rs2274170,-0.001  
6,148.399,rs9403839,-0.001  
6,148.459,rs1406537,-0.001  
6,148.517,rs6907758,-0.002  
6,148.696,rs694625,-0.008  
6,148.949,rs6924763,-0.011  
6,149.021,rs642527,-0.012  
6,149.056,rs325105,-0.012  
6,149.078,rs10447451,-0.013  
6,149.092,rs635513,-0.015

6,149.170,rs765153,-0.022  
6,149.176,rs12203200,-0.032  
6,149.230,rs844589,-0.028  
6,149.289,rs9377064,-0.028  
6,149.339,rs1302019,-0.031  
6,149.358,rs9390488,-0.032  
6,149.361,rs1523965,-0.033  
6,149.388,rs9497839,-0.035  
6,149.399,rs17077242,-0.026  
6,149.477,rs7753767,-0.029  
6,149.496,rs9377079,-0.030  
6,149.553,rs12195214,-0.042  
6,149.567,rs9386196,-0.045  
6,149.595,rs1528868,-0.048  
6,149.679,rs600222,-0.054  
6,149.721,rs3915135,-0.047  
6,149.840,rs2272450,-0.046  
6,149.921,rs1934797,-0.065  
6,149.928,rs1007475,-0.067  
6,149.936,rs7764264,-0.067  
6,149.989,rs7765680,-0.069  
6,150.027,rs9322128,-0.067  
6,150.071,rs6920454,-0.085  
6,150.087,rs2328856,-0.087  
6,150.096,rs9784873,-0.088  
6,150.127,rs9373552,-0.091  
6,150.184,rs9373554,-0.097  
6,150.198,rs2493920,-0.081  
6,150.215,rs4434491,-0.073  
6,150.248,rs4445079,-0.056  
6,150.282,rs9377127,-0.043  
6,150.304,rs17078272,-0.036  
6,150.343,rs10457832,-0.033  
6,150.350,rs12196375,-0.022  
6,150.374,rs17635342,-0.020  
6,150.389,rs4243482,-0.019  
6,150.431,rs6941174,-0.023  
6,150.444,rs9399650,-0.023  
6,150.452,rs12210132,-0.024  
6,150.453,rs6930337,-0.024  
6,150.454,rs4897015,-0.024  
6,150.456,rs6570854,-0.024  
6,150.490,rs1624157,-0.023  
6,150.501,rs6931504,-0.023  
6,150.510,rs9377143,-0.030  
6,150.512,rs1147862,-0.032  
6,150.526,rs1147857,-0.038  
6,150.543,rs1465307,-0.030  
6,150.550,rs9498061,-0.038  
6,150.558,rs208696,-0.048  
6,150.645,rs208707,-0.037  
6,150.670,rs208704,-0.024  
6,150.674,rs208702,-0.024  
6,150.765,rs9377145,-0.039  
6,150.766,rs6909404,-0.039  
6,150.767,rs9390586,-0.039  
6,150.807,rs9390588,-0.037  
6,150.832,rs9498070,-0.037  
6,151.025,rs7451498,-0.027  
6,151.175,rs7453519,-0.038  
6,151.308,rs4130936,-0.048

6,151.329,rs9377155,-0.051  
6,151.419,rs9498147,-0.058  
6,151.493,rs17645564,-0.061  
6,151.553,rs9386234,-0.051  
6,151.583,rs7753810,-0.045  
6,151.642,rs7751854,-0.055  
6,151.786,rs2128332,-0.045  
6,151.998,rs9498175,-0.059  
6,152.057,rs12192351,-0.065  
6,152.081,rs13215793,-0.063  
6,152.087,rs9498176,-0.060  
6,152.112,rs1156561,-0.046  
6,152.114,rs17728886,-0.046  
6,152.151,rs9390650,-0.050  
6,152.264,rs6570947,-0.069  
6,152.298,rs7766009,-0.069  
6,152.315,rs616003,-0.069  
6,152.327,rs6910470,-0.069  
6,152.353,rs6570957,-0.069  
6,152.484,rs2789503,-0.055  
6,152.521,rs17733403,-0.055  
6,152.528,rs17087579,-0.055  
6,152.957,rs9371533,-0.061  
6,153.030,rs6557200,-0.070  
6,153.070,rs7773464,-0.072  
6,153.088,rs9383633,-0.070  
6,153.089,rs6922844,-0.070  
6,153.146,rs644866,-0.069  
6,153.152,rs4870236,-0.069  
6,153.252,rs6916591,-0.076  
6,153.277,rs9479762,-0.066  
6,153.306,rs9397708,-0.071  
6,153.325,rs6905409,-0.060  
6,153.332,rs9397194,-0.059  
6,153.349,rs7773289,-0.057  
6,153.350,rs11759558,-0.057  
6,153.392,rs4870386,-0.050  
6,153.454,rs9397821,-0.031  
6,153.487,rs9397264,-0.030  
6,153.568,rs588036,-0.019  
6,153.633,rs6917472,-0.005  
6,153.661,rs742315,-0.005  
6,153.789,rs7740233,-0.009  
6,153.810,rs1122537,-0.011  
6,153.815,rs9372074,-0.011  
6,153.842,rs7750629,-0.010  
6,153.882,rs12527099,-0.008  
6,153.883,rs11155745,-0.008  
6,153.888,rs6557548,-0.008  
6,154.008,rs6919370,-0.008  
6,154.213,rs712218,-0.008  
6,154.221,rs6923505,-0.007  
6,154.242,rs17080350,-0.003  
6,154.272,rs761264,-0.003  
6,154.302,rs6917461,-0.002  
6,154.305,rs803407,-0.002  
6,154.326,rs17427389,-0.002  
6,154.467,rs4869953,-0.001  
6,154.576,rs803456,-0.002  
6,154.580,rs803455,-0.002  
6,154.632,rs803447,-0.002



6,154.739,rs569110,-0.004  
6,154.823,rs505358,-0.001  
6,154.915,rs9478918,-0.003  
6,155.030,rs9397032,-0.007  
6,155.050,rs9371494,-0.007  
6,155.123,rs6934983,-0.003  
6,155.138,rs4869988,-0.002  
6,155.198,rs7771304,-0.001  
6,155.244,rs4869991,-0.001  
6,155.249,rs6909007,-0.001  
6,155.258,rs942382,-0.001  
6,155.345,rs752543,-0.000  
6,155.384,rs9478984,0.000  
6,155.497,rs9478187,0.004  
6,155.551,rs4870002,0.002  
6,155.560,rs10499265,0.002  
6,155.635,rs17081009,0.004  
6,155.662,rs9383877,0.005  
6,155.702,rs10155709,0.004  
6,155.724,rs2473609,0.003  
6,155.734,rs9397389,0.003  
6,155.742,rs4870010,0.003  
6,155.743,rs926561,0.008  
6,155.747,rs12664268,0.008  
6,155.762,rs12210237,0.008  
6,155.766,rs12205375,0.008  
6,155.769,rs2347436,0.008  
6,156.163,rs11756337,0.004  
6,156.331,rs9479055,0.003  
6,156.411,rs7754143,0.002  
6,156.602,rs7752591,0.001  
6,156.742,rs980281,0.000  
6,156.926,rs3020306,-0.001  
6,157.065,rs17081685,-0.001  
6,157.155,rs11155813,-0.000  
6,157.173,rs827423,-0.000  
6,157.486,rs3020314,-0.001  
6,157.583,rs9371236,-0.001  
6,157.725,rs2982712,-0.000  
6,157.804,rs12199102,0.000  
6,157.939,rs10484863,0.002  
6,157.964,rs2635475,0.005  
6,157.977,rs2348262,0.004  
6,157.982,rs6901280,0.005  
6,158.000,rs2813504,0.014  
6,158.052,rs2673776,0.029  
6,158.059,rs17082323,0.029  
6,158.064,rs3798756,0.029  
6,158.070,rs2763028,0.029  
6,158.098,rs1359323,0.030  
6,158.234,rs1408458,0.026  
6,158.248,rs9479288,0.026  
6,158.255,rs9371581,0.025  
6,158.267,rs9371583,0.024  
6,158.385,rs214955,0.015  
6,158.399,rs1933689,0.015  
6,158.527,rs214976,0.008  
6,158.718,rs9322378,0.006  
6,158.820,rs2695253,0.006  
6,159.094,rs1407267,0.007  
6,159.102,rs3823082,0.007

6,159.106,rs12201030,0.008  
6,159.123,rs671330,0.013  
6,159.140,rs606445,0.009  
6,159.151,rs596362,0.010  
6,159.223,rs311326,0.022  
6,159.236,rs17083085,0.023  
6,159.290,rs192846,0.024  
6,159.397,rs539107,0.021  
6,159.497,rs6915111,0.023  
6,159.554,rs3757066,0.023  
6,159.648,rs1292830,0.024  
6,159.683,rs9479488,0.026  
6,159.752,rs17083512,0.031  
6,159.904,rs1124016,0.042  
6,159.944,rs553072,0.061  
6,159.945,rs12153830,0.062  
6,159.966,rs315428,0.072  
6,160.013,rs1871400,0.073  
6,160.023,rs1890312,0.090  
6,160.027,rs317104,0.090  
6,160.079,rs7762618,0.094  
6,160.196,rs1479438,0.082  
6,160.263,rs2185276,0.077  
6,160.275,rs11969504,0.077  
6,160.321,rs1386208,0.076  
6,160.332,rs2790090,0.076  
6,160.628,rs11756366,0.060  
6,160.685,rs1154029,0.073  
6,160.876,rs9478457,0.079  
6,160.965,rs9397637,0.089  
6,161.071,rs1937580,0.090  
6,161.116,rs1892361,0.092  
6,161.196,rs10485262,0.104  
6,161.277,rs2065139,0.110  
6,161.292,rs581564,0.111  
6,161.320,rs574350,0.109  
6,161.345,rs9478495,0.107  
6,161.388,rs563649,0.106  
6,161.407,rs10485058,0.103  
6,161.416,rs518596,0.101  
6,161.417,rs483481,0.115  
6,161.421,rs4870268,0.098  
6,161.470,rs7759388,0.069  
6,161.494,rs4118099,0.082  
6,161.496,rs13193677,0.082  
6,161.515,rs2092417,0.077  
6,161.520,rs2499646,0.072  
6,161.526,rs742517,0.072  
6,161.531,rs761130,0.072  
6,161.548,rs11968059,0.072  
6,161.589,rs9397714,0.073  
6,161.629,rs3812243,0.074  
6,161.715,rs9397717,0.077  
6,161.818,rs7742597,0.072  
6,161.862,rs12194277,0.068  
6,161.908,rs6911971,0.064  
6,162.083,rs17085526,0.053  
6,162.355,rs9479923,0.035  
6,162.433,rs7738774,0.034  
6,162.476,rs9397197,0.040  
6,162.760,rs12523716,0.016

6,162.794,rs11156007,0.011  
6,162.817,rs7745332,0.009  
6,162.866,rs4869840,0.004  
6,162.893,rs9322494,0.002  
6,162.938,rs12210329,0.001  
6,162.939,rs9480006,0.001  
6,162.968,rs2498491,0.002  
6,163.062,rs4484531,0.004  
6,163.130,rs7774757,0.004  
6,163.161,rs11156008,0.004  
6,163.186,rs17085911,0.005  
6,163.445,rs931312,0.014  
6,163.534,rs2352150,0.019  
6,163.596,rs7770051,0.019  
6,163.618,rs9478621,0.026  
6,163.627,rs10081066,0.041  
6,163.756,rs2985700,0.049  
6,163.795,rs6557416,0.048  
6,163.911,rs335407,0.035  
6,163.928,rs335419,0.033  
6,164.039,rs9478648,0.035  
6,164.040,rs11966765,0.035  
6,164.059,rs231948,0.035  
6,164.091,rs2235668,0.036  
6,164.106,rs6919626,0.036  
6,164.115,rs2235674,0.035  
6,164.116,rs12661812,0.035  
6,164.117,rs9478652,0.035  
6,164.177,rs4869859,0.052  
6,164.198,rs9371379,0.041  
6,164.220,rs9371910,0.041  
6,164.367,rs12207602,0.037  
6,164.398,rs11967053,0.036  
6,164.407,rs9480206,0.026  
6,164.436,rs4128674,0.028  
6,164.459,rs9383776,0.030  
6,164.558,rs9384389,0.019  
6,164.672,rs6906938,0.014  
6,164.684,rs4591861,0.014  
6,164.774,rs6909234,0.012  
6,164.809,rs1584535,0.014  
6,164.850,rs1375714,0.019  
6,164.891,rs10499290,0.017  
6,164.986,rs7742923,0.013  
6,164.998,rs10499286,0.014  
6,165.051,rs2820406,0.025  
6,165.120,rs9478696,0.041  
6,165.147,rs9384450,0.041  
6,165.170,rs9480304,0.039  
6,165.202,rs7739135,0.040  
6,165.261,rs9384456,0.038  
6,165.353,rs2819091,0.034  
6,165.388,rs2045138,0.048  
6,165.577,rs288956,0.050  
6,165.661,rs11156119,0.039  
6,165.750,rs9384488,0.034  
6,165.801,rs2151884,0.032  
6,165.917,rs158258,0.031  
6,166.033,rs6909426,0.034  
6,166.091,rs4318894,0.032  
6,166.097,rs9397995,0.032

6,166.101,rs7763624,0.032  
6,166.103,rs13205126,0.033  
6,166.122,rs17088158,0.034  
6,166.123,rs10457101,0.025  
6,166.138,rs1007250,0.025  
6,166.519,rs183048,0.058  
6,166.542,rs2365386,0.052  
6,166.543,rs733207,0.052  
6,166.567,rs924928,0.048  
6,166.703,rs9355891,0.098  
6,166.711,rs7765247,0.101  
6,166.728,rs1864500,0.101  
6,166.730,rs1753196,0.102  
6,166.731,rs16900421,0.112  
6,166.732,rs2770113,0.124  
6,166.737,rs2803358,0.138  
6,166.739,rs2803362,0.147  
6,166.757,rs2770104,0.177  
6,166.821,rs9356167,0.176  
6,166.856,rs12202135,0.174  
6,166.857,rs9459093,0.174  
6,166.888,rs16900563,0.169  
6,166.891,rs2502620,0.168  
6,166.923,rs2502601,0.163  
6,166.952,rs9459503,0.164  
6,167.012,rs9348153,0.164  
6,167.017,rs6929952,0.164  
6,167.500,rs600752,0.169  
6,167.552,rs7753885,0.169  
6,167.743,rs1545217,0.201  
6,167.917,rs317802,0.208  
6,168.017,rs9456343,0.211  
6,168.044,rs9457456,0.211  
6,168.149,rs3102971,0.217  
6,168.287,rs3127158,0.230  
6,168.304,rs2129211,0.262  
6,168.402,rs9457507,0.280  
6,168.445,rs12662184,0.296  
6,168.724,rs1738074,0.405  
6,168.820,rs6900680,0.423  
6,168.829,rs3120629,0.425  
6,168.834,rs12209018,0.427  
6,168.855,rs2485368,0.439  
6,168.907,rs2451244,0.505  
6,168.919,rs2485328,0.498  
6,169.087,rs12526577,0.507  
6,169.301,rs905684,0.492  
6,169.350,rs9365046,0.500  
6,169.403,rs9365049,0.507  
6,169.433,rs6455633,0.509  
6,169.491,rs9295098,0.513  
6,169.544,rs16890289,0.515  
6,169.567,rs4709321,0.516  
6,169.568,rs4709322,0.516  
6,169.590,rs4521619,0.520  
6,169.633,rs6901745,0.524  
6,169.756,rs409359,0.504  
6,169.760,rs9295103,0.553  
6,169.761,rs378512,0.576  
6,169.763,rs10945617,0.630  
6,169.779,rs240877,0.642

6,169.816,rs7754295,0.664  
6,169.817,rs2842997,0.665  
6,169.820,rs2842994,0.664  
6,169.890,rs6929124,0.643  
6,169.904,rs876380,0.646  
6,169.907,rs6902339,0.675  
6,169.909,rs11965350,0.693  
6,170.000,rs3798189,0.691  
6,170.015,rs688359,0.693  
6,170.029,rs8191890,0.696  
6,170.036,rs3798176,0.689  
6,170.038,rs3777401,0.687  
6,170.058,rs3798174,0.664  
6,170.061,rs6937722,0.655  
6,170.069,rs1443844,0.631  
6,170.072,rs4646283,0.613  
6,170.086,rs791183,0.545  
6,170.128,rs7761031,0.511  
6,170.171,rs9346816,0.467  
6,170.217,rs2504926,0.435  
6,170.296,rs7761293,0.381  
6,170.466,rs10945682,0.331  
6,170.532,rs6935921,0.329  
6,170.580,rs9295131,0.332  
6,170.583,rs783147,0.332  
6,170.595,rs1853025,0.334  
6,170.657,rs1084656,0.341  
6,170.907,rs1247330,0.357  
6,170.969,rs1530395,0.360  
6,171.022,rs657030,0.362  
6,171.208,rs9347479,0.348  
6,171.239,rs7754196,0.363  
6,171.256,rs2272197,0.371  
6,171.292,rs2293286,0.384  
6,171.304,rs3734462,0.390  
6,171.346,rs6934457,0.404  
6,171.354,rs729986,0.405  
6,171.380,rs3798925,0.399  
6,171.506,rs3798943,0.349  
6,171.552,rs374255,0.329  
6,171.561,rs1077281,0.331  
6,171.569,rs1080085,0.337  
6,171.589,rs11758285,0.324  
6,171.592,rs1407211,0.326  
6,171.601,rs9347493,0.325  
6,171.708,rs7766508,0.344  
6,171.785,rs13202365,0.362  
6,171.792,rs4454114,0.365  
6,171.800,rs13211741,0.370  
6,171.801,rs9355898,0.373  
6,171.834,rs6904671,0.441  
6,171.836,rs12154057,0.441  
6,171.840,rs17647823,0.443  
6,171.843,rs9456674,0.447  
6,171.964,rs2223768,0.600  
6,171.983,rs480557,0.619  
6,171.995,rs475221,0.621  
6,171.998,rs530128,0.621  
6,172.028,rs9346868,0.621  
6,172.051,rs9365300,0.627  
6,172.197,rs6455744,0.693

6,172.249,rs9458331,0.713  
6,172.305,rs9364608,0.714  
6,172.333,rs6921226,0.696  
6,172.348,rs11962671,0.688  
6,172.393,rs2180025,0.595  
6,172.415,rs16893004,0.586  
6,172.478,rs10945778,0.575  
6,172.494,rs3019435,0.571  
6,172.543,rs7739802,0.599  
6,172.584,rs7738279,0.583  
6,172.616,rs3798218,0.570  
6,172.685,rs9347553,0.530  
6,172.709,rs9458413,0.485  
6,172.763,rs9458419,0.445  
6,172.992,rs7738197,0.418  
6,173.042,rs2187198,0.415  
6,173.215,rs6917371,0.402  
6,173.511,rs4605857,0.380  
6,173.708,rs9355987,0.395  
6,173.734,rs11961127,0.405  
6,173.760,rs12529283,0.415  
6,173.843,rs2023073,0.394  
6,174.027,rs6922813,0.439  
6,174.265,rs952388,0.497  
6,174.329,rs4709595,0.502  
6,174.605,rs2142524,0.500  
6,174.614,rs12661450,0.501  
6,174.625,rs4709619,0.502  
6,174.658,rs1893107,0.545  
6,174.832,rs1893540,0.578  
6,174.990,rs1333955,0.606  
6,174.998,rs1041632,0.605  
6,175.078,rs6936963,0.641  
6,175.102,rs9347700,0.649  
6,175.109,rs1877771,0.695  
6,175.116,rs915013,0.692  
6,175.195,rs4329088,0.691  
6,175.263,rs3939989,0.744  
6,175.362,rs536980,0.823  
6,175.366,rs2476468,0.822  
6,175.374,rs566126,0.819  
6,175.406,rs12197200,0.812  
6,175.437,rs1008295,0.871  
6,175.439,rs6907521,0.869  
6,175.459,rs9458753,0.860  
6,175.483,rs6922754,0.848  
6,175.500,rs2294458,0.818  
6,175.535,rs7750165,0.773  
6,175.545,rs13200025,0.765  
6,175.553,rs7768540,0.769  
6,175.560,rs742333,0.772  
6,175.563,rs4709698,0.781  
6,175.573,rs12197625,0.846  
6,175.575,rs12529659,0.859  
6,175.576,rs9346956,0.865  
6,175.578,rs9306,0.866  
6,175.591,rs2321514,0.844  
6,175.609,rs760886,0.776  
6,175.621,rs9364686,0.732  
6,175.631,rs13220178,0.712  
6,175.651,rs4709714,0.754

6,175.700,rs2759386,0.769  
6,175.722,rs9458828,0.775  
6,175.889,rs7761240,0.810  
6,175.906,rs10945909,0.826  
6,175.913,rs9355432,0.836  
6,175.932,rs1983789,0.857  
6,175.949,rs9364696,0.869  
6,175.978,rs1407662,0.861  
6,176.070,rs6926801,0.791  
6,176.146,rs9347792,0.761  
6,176.186,rs17441835,0.775  
6,176.233,rs4709786,0.794  
6,176.293,rs6921880,0.836  
6,176.307,rs6928944,0.847  
6,176.309,rs12205431,0.844  
6,176.332,rs6910079,0.812  
6,176.353,rs9456909,0.868  
6,176.448,rs9355453,0.733  
6,176.454,rs2064793,0.729  
6,176.556,rs3752534,0.636  
6,176.569,rs206686,0.631  
6,176.585,rs9347819,0.637  
6,176.610,rs17550239,0.647  
6,176.624,rs9346995,0.665  
6,176.663,rs807897,0.652  
6,176.772,rs794108,0.519  
6,176.811,rs12525909,0.591  
6,176.815,rs705779,0.593  
6,176.888,rs9347838,0.633  
6,177.113,rs6903174,0.573  
6,177.236,rs9347879,0.538  
6,177.278,rs727811,0.531  
6,177.374,rs1390469,0.502  
6,177.463,rs7747058,0.475  
6,177.548,rs9356281,0.407  
6,177.583,rs9365785,0.399  
6,177.627,rs6923885,0.373  
6,177.649,rs7764525,0.354  
6,177.660,rs1227989,0.352  
6,177.808,rs2146032,0.327  
6,177.838,rs2066897,0.319  
6,177.900,rs17490175,0.314  
6,177.917,rs568444,0.316  
6,177.946,rs2758932,0.325  
6,178.038,rs1764047,0.326  
6,178.047,rs6923393,0.367  
6,178.164,rs4324759,0.399  
6,178.325,rs9459407,0.400  
6,178.333,rs16897782,0.395  
6,178.364,rs220772,0.348  
6,178.379,rs578654,0.374  
6,178.388,rs9459417,0.379  
6,178.428,rs221746,0.399  
6,178.434,rs9364795,0.401  
6,178.451,rs221735,0.410  
6,178.453,rs221726,0.411  
6,178.540,rs4709946,0.429  
6,178.690,rs9457107,0.378  
6,178.694,rs844157,0.414  
6,178.763,rs2983500,0.390  
6,178.795,rs9459464,0.379

6,178.874,rs9365900,0.352  
6,178.893,rs875590,0.318  
6,178.924,rs3008061,0.316  
6,179.025,rs9356381,0.309  
6,179.026,rs4424058,0.309  
6,179.057,rs9459484,0.307  
6,179.098,rs4463239,0.305  
6,179.303,rs2323029,0.301  
6,179.359,rs4709984,0.306  
6,179.364,rs6928719,0.309  
6,179.473,rs9348048,0.251  
6,179.565,rs9364819,0.194  
6,179.605,rs9348050,0.172  
6,179.616,rs7751553,0.171  
6,179.780,rs2500475,0.149  
6,179.896,rs4472324,0.130  
6,179.981,rs93622,0.120  
6,180.081,rs9364827,0.126  
6,180.122,rs300122,0.130  
6,180.156,rs12209946,0.134  
6,180.242,rs9348064,0.143  
6,180.771,rs3099266,0.239  
6,180.914,rs6456056,0.248  
6,181.066,rs9365980,0.235  
6,181.109,rs4367352,0.231  
6,181.123,rs6940834,0.261  
6,181.169,rs9355566,0.270  
6,181.397,rs4709111,0.275  
6,181.687,rs6925364,0.207  
6,181.963,rs3817777,0.176  
6,182.007,rs2071941,0.179  
6,182.150,rs6918886,0.171  
6,182.298,rs960145,0.156  
6,182.386,rs9355586,0.169  
6,182.559,rs6921577,0.191  
6,182.605,rs9459715,0.190  
6,182.621,rs6456102,0.189  
6,182.639,rs6911624,0.189  
6,182.660,rs4710081,0.188  
6,182.736,rs7770200,0.206  
6,182.766,rs1883361,0.220  
6,182.812,rs9347154,0.241  
6,182.827,rs409161,0.248  
6,182.856,rs533810,0.250  
6,182.973,rs1099646,0.256  
6,183.293,rs6933508,0.224  
6,183.923,rs6456156,0.209  
6,183.937,rs1015077,0.210  
6,183.995,rs3798315,0.211  
6,184.007,rs3093012,0.211  
6,184.066,rs9459893,0.212  
6,184.250,rs9364896,0.213  
6,184.439,rs4710230,0.175  
6,184.654,rs2981977,0.159  
6,184.688,rs9457305,0.155  
6,184.852,rs6455553,0.122  
6,184.877,rs6455560,0.139  
6,184.888,rs9364939,0.136  
6,185.465,rs4708591,0.070  
6,185.954,rs1132306,0.017  
6,186.029,rs6900844,0.007



6,186.043,rs3752611,0.007  
6,186.099,rs9455933,0.005  
6,186.150,rs3734896,0.006  
6,186.212,rs902385,0.008  
6,186.256,rs4708652,0.008  
6,186.284,rs1565441,0.004  
6,186.287,rs6931528,0.001  
6,186.310,rs6916885,0.004  
6,186.313,rs6927982,0.003  
6,186.322,rs4708676,0.000  
6,186.358,rs6941655,0.000  
6,186.495,rs9346536,-0.000  
6,186.516,rs6924059,-0.000  
6,186.548,rs2054476,-0.000  
6,186.580,rs7750101,-0.000  
6,186.608,rs4292501,-0.000  
6,186.877,rs9364457,-0.003  
6,186.918,rs2609326,-0.006  
6,186.947,rs5016787,-0.003  
6,186.982,rs13205533,-0.005  
6,186.998,rs2180346,-0.006  
6,187.038,rs2342630,-0.008  
6,187.045,rs6455534,-0.008  
6,187.111,rs6913757,-0.011  
6,187.163,rs4708481,-0.012  
6,187.176,rs6931082,-0.013  
6,187.339,rs196506,-0.015  
6,187.425,rs9355010,-0.019  
6,187.490,rs10945314,-0.022  
6,187.611,rs4708389,-0.022  
6,187.691,rs9346596,-0.016  
6,187.725,rs3818701,-0.015  
6,187.787,rs7766847,-0.018  
6,187.839,rs10945359,-0.024  
6,187.861,rs7765333,-0.023  
6,187.867,rs17182988,-0.023  
6,187.907,rs9294949,-0.021  
6,187.938,rs12179836,-0.019  
6,187.978,rs9294955,-0.020  
6,187.996,rs2093524,-0.020  
6,188.072,rs4708599,-0.014  
6,188.151,rs7764005,-0.008  
6,188.168,rs8089,-0.008  
6,188.193,rs6940420,-0.007  
6,188.202,rs9283850,-0.007  
6,188.213,rs9379341,-0.006  
6,188.235,rs6605524,-0.004  
6,188.254,rs9379335,-0.005  
6,188.313,rs13215678,-0.009  
6,188.426,rs9283855,-0.011  
6,188.729,rs2473445,-0.003  
6,188.883,rs4716393,-0.003  
6,189.024,rs4134409,-0.000  
6,189.087,rs6940159,0.000  
6,189.148,rs11753530,0.000  
6,189.257,rs4710698,-0.000  
6,189.279,rs719960,-0.001  
6,189.466,rs745285,-0.003  
6,189.483,rs6456183,-0.003  
6,189.496,rs7763013,-0.004  
6,189.533,rs2144671,-0.007

6,189.683,rs4710723,-0.007  
6,189.711,rs10946273,-0.007  
6,189.734,rs9460196,-0.007  
6,189.816,rs12207633,-0.006  
6,189.819,rs4314481,-0.006  
6,189.822,rs12205313,-0.006  
7,2.331,rs3924854,0.287  
7,2.370,rs7806249,0.310  
7,2.397,rs11185556,0.281  
7,2.414,rs3923903,0.274  
7,2.505,rs6583351,0.240  
7,2.521,rs4916935,0.287  
7,2.526,rs12718123,0.303  
7,3.525,rs6461378,0.172  
7,3.765,rs9639696,0.105  
7,3.911,rs4236375,0.089  
7,4.016,rs1880297,0.084  
7,4.022,rs17234336,0.083  
7,4.068,rs17151803,0.065  
7,4.123,rs13241427,0.046  
7,4.163,rs2690262,0.034  
7,4.185,rs11763092,0.038  
7,4.301,rs3934914,0.047  
7,4.357,rs10267348,0.049  
7,4.526,rs6463900,0.066  
7,4.589,rs10244477,0.072  
7,4.600,rs10274145,0.076  
7,4.622,rs1275,0.085  
7,4.697,rs12703010,0.121  
7,4.801,rs4720940,0.154  
7,5.224,rs10950503,0.199  
7,5.330,rs10950536,0.203  
7,5.531,rs3800933,0.259  
7,5.561,rs1626670,0.272  
7,5.609,rs4721524,0.290  
7,5.657,rs10950641,0.308  
7,5.727,rs12699855,0.327  
7,5.744,rs7801817,0.333  
7,5.824,rs6952809,0.372  
7,5.942,rs2906142,0.414  
7,6.054,rs1550202,0.448  
7,6.057,rs10488610,0.449  
7,6.061,rs1036504,0.450  
7,6.119,rs3735109,0.428  
7,6.139,rs12537408,0.453  
7,6.141,rs17132513,0.454  
7,6.149,rs4721900,0.459  
7,6.233,rs7776527,0.513  
7,6.339,rs208346,0.549  
7,6.633,rs2527521,0.571  
7,6.706,rs6957938,0.567  
7,6.782,rs6948739,0.591  
7,6.953,rs1713910,0.613  
7,7.010,rs10225022,0.570  
7,7.033,rs7806365,0.551  
7,7.154,rs1878808,0.579  
7,7.268,rs10236776,0.626  
7,7.278,rs6461781,0.633  
7,7.328,rs1843939,0.633  
7,7.330,rs17238159,0.622  
7,7.340,rs6461796,0.542

7,7.347,rs10951010,0.522  
7,7.355,rs6953573,0.527  
7,7.376,rs6461814,0.513  
7,7.385,rs7780988,0.513  
7,7.451,rs6943837,0.468  
7,7.459,rs4722435,0.465  
7,7.500,rs6964682,0.419  
7,7.575,rs10272892,0.397  
7,7.654,rs6947894,0.426  
7,7.760,rs4316064,0.487  
7,7.891,rs11972454,0.482  
7,7.997,rs10499335,0.472  
7,8.075,rs6944958,0.384  
7,8.130,rs9791502,0.393  
7,8.291,rs6462225,0.424  
7,8.512,rs10215031,0.413  
7,8.530,rs10228937,0.420  
7,8.584,rs4236342,0.433  
7,8.606,rs625537,0.406  
7,8.625,rs610962,0.373  
7,8.628,rs17134653,0.372  
7,8.643,rs1044701,0.354  
7,8.652,rs11762889,0.351  
7,8.656,rs10488357,0.317  
7,8.665,rs2097884,0.337  
7,8.672,rs2158629,0.352  
7,8.678,rs7794252,0.370  
7,8.703,rs17134816,0.425  
7,8.773,rs6958864,0.442  
7,8.871,rs11971741,0.446  
7,8.976,rs1117769,0.462  
7,9.188,rs12701792,0.491  
7,9.383,rs1001396,0.452  
7,9.396,rs9791644,0.448  
7,9.415,rs4720386,0.445  
7,9.495,rs4523152,0.439  
7,9.509,rs6973046,0.431  
7,9.570,rs12701915,0.394  
7,9.571,rs9690101,0.433  
7,9.815,rs3763381,0.375  
7,9.943,rs6463152,0.402  
7,9.964,rs13222836,0.370  
7,10.252,rs7826,0.403  
7,10.441,rs4585633,0.430  
7,10.561,rs7798496,0.449  
7,10.633,rs13227672,0.482  
7,10.846,rs4236378,0.467  
7,10.880,rs4720539,0.465  
7,10.977,rs6463343,0.389  
7,11.046,rs6958502,0.349  
7,11.073,rs3889348,0.353  
7,11.131,rs6943227,0.381  
7,11.151,rs10278799,0.393  
7,11.227,rs4724592,0.435  
7,11.265,rs6945065,0.445  
7,11.327,rs4724662,0.469  
7,11.504,rs4720630,0.481  
7,11.563,rs6964614,0.477  
7,11.640,rs7808325,0.459  
7,11.904,rs852540,0.476  
7,11.941,rs6946228,0.473

7,12.044,rs4724712,0.481  
7,12.165,rs4724739,0.511  
7,12.204,rs308074,0.517  
7,12.362,rs6979676,0.534  
7,12.422,rs591982,0.547  
7,12.510,rs1017035,0.619  
7,12.524,rs10240988,0.621  
7,12.632,rs11764399,0.627  
7,12.659,rs2113628,0.628  
7,12.666,rs6952125,0.626  
7,12.741,rs836556,0.614  
7,12.856,rs1105664,0.585  
7,12.901,rs7800401,0.570  
7,12.969,rs2253869,0.556  
7,13.026,rs17789894,0.553  
7,13.041,rs6944332,0.553  
7,13.206,rs4236396,0.517  
7,13.261,rs10253555,0.540  
7,13.353,rs10250073,0.475  
7,13.400,rs10260787,0.467  
7,13.432,rs7801523,0.478  
7,13.438,rs919681,0.482  
7,13.533,rs10259085,0.606  
7,13.595,rs6463669,0.639  
7,13.596,rs1317198,0.639  
7,13.606,rs1548774,0.613  
7,13.610,rs17166296,0.604  
7,13.650,rs6974119,0.655  
7,14.920,rs2024372,0.575  
7,14.948,rs11984316,0.598  
7,14.988,rs17137415,0.666  
7,15.002,rs11761203,0.682  
7,15.006,rs10276762,0.667  
7,15.011,rs7357092,0.640  
7,15.043,rs6944658,0.573  
7,15.058,rs6958354,0.548  
7,15.125,rs10249817,0.536  
7,15.154,rs11762146,0.535  
7,15.168,rs12533670,0.531  
7,15.173,rs17494426,0.529  
7,15.211,rs7795698,0.505  
7,15.278,rs6463740,0.453  
7,15.365,rs7785709,0.394  
7,15.396,rs10243568,0.384  
7,15.458,rs10251201,0.421  
7,15.481,rs6950165,0.421  
7,15.499,rs17140599,0.421  
7,15.551,rs37967,0.415  
7,15.590,rs715377,0.413  
7,15.857,rs6964558,0.380  
7,15.937,rs17401797,0.374  
7,16.006,rs4720763,0.379  
7,16.050,rs10156091,0.378  
7,16.058,rs3757524,0.378  
7,16.075,rs3757523,0.379  
7,16.099,rs6463778,0.371  
7,16.133,rs881451,0.396  
7,16.190,rs10952094,0.379  
7,16.206,rs10486213,0.317  
7,16.217,rs3807822,0.297  
7,16.234,rs3779363,0.313

7,16.264,rs7796406,0.256  
7,16.297,rs3779360,0.200  
7,16.328,rs3807814,0.204  
7,16.414,rs2349178,0.252  
7,16.425,rs12333784,0.256  
7,16.436,rs6969069,0.259  
7,16.436,rs7801871,0.259  
7,16.440,rs2056449,0.260  
7,16.441,rs12670364,0.260  
7,16.465,rs12666065,0.262  
7,16.589,rs6463799,0.270  
7,16.633,rs10242397,0.268  
7,16.871,rs7805772,0.233  
7,16.923,rs2040891,0.233  
7,17.003,rs6977578,0.270  
7,17.004,rs6978212,0.269  
7,17.040,rs2189903,0.250  
7,17.068,rs13438215,0.235  
7,17.200,rs6956624,0.215  
7,17.206,rs10227474,0.215  
7,17.288,rs4538793,0.218  
7,17.294,rs6974213,0.218  
7,17.516,rs11769942,0.276  
7,17.519,rs2057789,0.219  
7,17.548,rs17153994,0.252  
7,17.565,rs11536481,0.274  
7,17.567,rs7782816,0.276  
7,17.577,rs1981558,0.285  
7,17.671,rs6463839,0.363  
7,17.687,rs886505,0.362  
7,17.729,rs10268580,0.365  
7,17.781,rs10228121,0.391  
7,17.870,rs10486259,0.421  
7,17.900,rs2349786,0.425  
7,18.200,rs11984397,0.383  
7,18.234,rs17414932,0.381  
7,18.265,rs6961566,0.348  
7,18.287,rs10237048,0.314  
7,18.295,rs10249915,0.287  
7,18.306,rs887938,0.297  
7,18.332,rs10255740,0.261  
7,18.359,rs17158339,0.240  
7,18.372,rs12702828,0.237  
7,18.427,rs17158514,0.224  
7,18.437,rs1030008,0.221  
7,18.504,rs13242973,0.207  
7,18.538,rs12702844,0.207  
7,18.605,rs2286111,0.240  
7,18.670,rs293185,0.285  
7,18.686,rs2107755,0.264  
7,18.763,rs7791753,0.281  
7,18.811,rs2057847,0.276  
7,18.895,rs4720829,0.280  
7,18.990,rs7777070,0.279  
7,19.181,rs17161552,0.291  
7,19.263,rs11773271,0.294  
7,19.602,rs2251806,0.287  
7,19.659,rs9918508,0.288  
7,19.785,rs10216270,0.295  
7,19.905,rs2657237,0.305  
7,19.955,rs1032873,0.299

7,20.062,rs4273764,0.286  
7,20.170,rs320794,0.269  
7,20.377,rs1620397,0.222  
7,20.385,rs728260,0.236  
7,20.398,rs2915156,0.232  
7,20.401,rs9648642,0.230  
7,20.411,rs2971028,0.224  
7,20.492,rs6973780,0.215  
7,20.678,rs10236225,0.205  
7,20.776,rs7808481,0.198  
7,20.808,rs16876522,0.196  
7,20.818,rs16876525,0.195  
7,20.865,rs4725269,0.194  
7,21.015,rs2882836,0.220  
7,21.027,rs12703012,0.220  
7,21.029,rs1524240,0.220  
7,21.309,rs6962705,0.217  
7,21.472,rs7784127,0.216  
7,21.484,rs4720903,0.216  
7,21.529,rs979058,0.221  
7,21.604,rs968793,0.225  
7,21.625,rs10239619,0.226  
7,21.699,rs17163764,0.267  
7,21.885,rs17163925,0.293  
7,21.940,rs2906553,0.297  
7,22.046,rs7786061,0.297  
7,22.081,rs10440995,0.296  
7,22.120,rs2714402,0.259  
7,22.170,rs7812248,0.238  
7,22.174,rs10281406,0.237  
7,22.175,rs10281444,0.237  
7,22.214,rs9771478,0.278  
7,22.226,rs6978700,0.281  
7,22.273,rs916906,0.267  
7,22.410,rs4720986,0.227  
7,22.460,rs39186,0.213  
7,22.495,rs10486135,0.191  
7,22.503,rs2189311,0.190  
7,22.567,rs10242744,0.151  
7,22.569,rs2074603,0.150  
7,22.638,rs17574506,0.137  
7,22.693,rs2681050,0.116  
7,22.739,rs17164930,0.128  
7,22.755,rs2074598,0.129  
7,22.756,rs2074597,0.125  
7,22.759,rs2526099,0.131  
7,22.774,rs12699252,0.132  
7,23.004,rs1467344,0.084  
7,23.081,rs7783055,0.070  
7,23.273,rs2883597,0.045  
7,23.304,rs10215881,0.042  
7,23.387,rs6943159,0.040  
7,23.610,rs719680,0.023  
7,23.683,rs2215983,0.022  
7,23.715,rs2215994,0.021  
7,23.787,rs7789227,0.020  
7,23.788,rs2192745,0.020  
7,23.911,rs4721050,0.009  
7,24.019,rs6966915,0.005  
7,24.048,rs10225421,0.010  
7,24.236,rs10270435,0.009

7,24.328,rs1371601,0.009  
7,24.402,rs847914,0.010  
7,24.436,rs7804782,0.011  
7,24.441,rs1992309,0.011  
7,24.521,rs17166188,0.013  
7,24.540,rs6967031,0.015  
7,24.588,rs886890,0.015  
7,24.613,rs2691815,0.011  
7,24.622,rs1180398,0.004  
7,24.623,rs1017405,0.004  
7,24.649,rs4445118,0.000  
7,24.656,rs10488226,0.000  
7,24.678,rs2241748,0.000  
7,24.698,rs7789919,0.000  
7,24.714,rs17616207,0.000  
7,24.781,rs17617404,0.001  
7,24.785,rs702478,0.001  
7,24.934,rs10224102,0.004  
7,24.992,rs6957008,0.004  
7,25.007,rs4721160,0.004  
7,25.013,rs246831,0.005  
7,25.061,rs6964353,0.001  
7,25.174,rs7778616,0.000  
7,25.273,rs2108929,-0.000  
7,25.337,rs7784835,-0.001  
7,25.439,rs10279810,-0.003  
7,25.455,rs2884164,-0.004  
7,25.467,rs10950444,-0.004  
7,25.502,rs11975497,-0.003  
7,25.561,rs17707307,-0.005  
7,25.733,rs1594613,-0.008  
7,25.773,rs10242586,-0.026  
7,25.794,rs2723454,-0.033  
7,25.859,rs2692464,-0.034  
7,25.928,rs2357705,-0.030  
7,25.979,rs10230686,-0.039  
7,26.000,rs1581567,-0.045  
7,26.010,rs10807768,-0.048  
7,26.072,rs10243935,-0.057  
7,26.126,rs7783357,-0.056  
7,26.130,rs17167368,-0.056  
7,26.135,rs2848839,-0.056  
7,26.169,rs2568639,-0.055  
7,26.198,rs6964915,-0.050  
7,26.215,rs4719379,-0.043  
7,26.253,rs6461048,-0.033  
7,26.298,rs7794026,-0.033  
7,26.382,rs10281229,-0.028  
7,26.428,rs252001,-0.020  
7,26.443,rs722661,-0.021  
7,26.489,rs10268584,-0.025  
7,26.507,rs2237292,-0.026  
7,26.519,rs3801091,-0.027  
7,26.540,rs10085783,-0.026  
7,26.589,rs7800918,-0.025  
7,26.634,rs4721290,-0.036  
7,26.794,rs2884306,-0.042  
7,26.848,rs12533882,-0.034  
7,26.852,rs17167869,-0.033  
7,26.863,rs2357842,-0.031  
7,26.865,rs10251605,-0.031

7,26.924,rs17167930,-0.017  
7,26.960,rs7780524,-0.015  
7,26.970,rs6949550,-0.015  
7,27.017,rs17167959,-0.019  
7,27.040,rs17708126,-0.021  
7,27.065,rs12539033,-0.023  
7,27.081,rs7799548,-0.025  
7,27.085,rs10252549,-0.025  
7,27.132,rs40450,-0.016  
7,27.186,rs969690,-0.012  
7,27.222,rs6944473,-0.007  
7,27.257,rs13242229,-0.003  
7,27.310,rs2116532,0.000  
7,27.471,rs10239079,0.001  
7,27.526,rs10236653,0.001  
7,27.619,rs10499451,0.001  
7,27.669,rs16878221,0.002  
7,27.771,rs17168320,0.002  
7,27.820,rs2462566,0.002  
7,27.860,rs1404613,0.002  
7,28.086,rs16878281,0.007  
7,28.314,rs17168538,0.016  
7,28.316,rs40628,0.016  
7,28.337,rs36914,0.016  
7,28.425,rs6972083,0.018  
7,28.438,rs11514706,0.019  
7,28.472,rs218066,0.020  
7,28.534,rs10262813,0.022  
7,28.561,rs11760836,0.020  
7,28.643,rs9639223,0.016  
7,28.677,rs12699686,0.012  
7,28.840,rs10258070,0.007  
7,28.865,rs4377857,0.007  
7,28.905,rs4074352,0.007  
7,29.054,rs2389409,0.013  
7,29.140,rs2196395,0.012  
7,29.219,rs2237494,0.007  
7,29.222,rs6969519,0.007  
7,29.289,rs6461202,0.007  
7,29.327,rs17169004,0.001  
7,29.340,rs10226819,0.001  
7,29.344,rs10272623,0.001  
7,29.360,rs12670755,0.005  
7,29.361,rs6957483,0.005  
7,29.410,rs917625,0.005  
7,29.424,rs12113594,0.007  
7,29.464,rs11768573,0.015  
7,29.507,rs1942645,0.018  
7,29.644,rs6953206,0.024  
7,29.851,rs1527206,0.037  
7,30.046,rs2526604,0.053  
7,30.068,rs7789712,0.055  
7,30.151,rs10257743,0.062  
7,30.201,rs2528472,0.067  
7,30.228,rs917221,0.068  
7,30.229,rs9639262,0.068  
7,30.286,rs477644,0.073  
7,30.298,rs2389674,0.094  
7,30.318,rs562687,0.099  
7,30.341,rs523615,0.122  
7,30.379,rs12670185,0.131



7,30.381,rs4719474,0.131  
7,30.408,rs696279,0.144  
7,30.416,rs17169573,0.147  
7,30.446,rs6977880,0.153  
7,30.448,rs706041,0.178  
7,30.504,rs1674802,0.218  
7,30.515,rs818803,0.230  
7,30.545,rs3807496,0.237  
7,30.547,rs12112188,0.266  
7,30.575,rs706078,0.298  
7,30.656,rs4370433,0.339  
7,30.663,rs17136772,0.375  
7,30.663,rs6968539,0.375  
7,30.664,rs6969383,0.376  
7,30.706,rs16871504,0.387  
7,30.768,rs847440,0.387  
7,30.827,rs1523632,0.383  
7,30.867,rs672365,0.358  
7,30.876,rs10243674,0.353  
7,30.879,rs12699826,0.353  
7,30.899,rs7801891,0.354  
7,30.902,rs940823,0.354  
7,30.956,rs6944767,0.395  
7,30.983,rs11773260,0.396  
7,31.036,rs4552804,0.390  
7,31.064,rs1476081,0.390  
7,31.201,rs10950657,0.381  
7,31.250,rs1077773,0.402  
7,31.262,rs6977113,0.406  
7,31.331,rs524715,0.429  
7,31.340,rs17137763,0.421  
7,31.351,rs13239692,0.413  
7,31.521,rs10268888,0.473  
7,31.536,rs10242846,0.469  
7,31.542,rs6963617,0.470  
7,31.570,rs1448672,0.486  
7,31.658,rs10260737,0.561  
7,31.674,rs2075083,0.574  
7,31.695,rs2389833,0.593  
7,31.711,rs7786114,0.604  
7,31.723,rs17138233,0.598  
7,31.744,rs2723535,0.595  
7,31.756,rs2140711,0.597  
7,31.971,rs11766489,0.617  
7,32.065,rs7804628,0.600  
7,32.102,rs2049726,0.593  
7,32.239,rs1178375,0.607  
7,32.270,rs917325,0.611  
7,32.391,rs17419156,0.608  
7,32.447,rs13228023,0.633  
7,32.480,rs11977093,0.634  
7,32.513,rs17347800,0.635  
7,32.519,rs10243618,0.636  
7,32.633,rs1726614,0.619  
7,32.667,rs1554774,0.615  
7,32.671,rs3801986,0.615  
7,32.687,rs2519890,0.608  
7,32.764,rs1178118,0.617  
7,32.825,rs13241957,0.608  
7,32.855,rs6963568,0.550  
7,32.881,rs2520361,0.507

7,32.912,rs756853,0.445  
7,32.949,rs10252839,0.367  
7,32.956,rs10278449,0.353  
7,32.960,rs10272709,0.338  
7,32.960,rs11764843,0.333  
7,32.963,rs13438248,0.328  
7,32.986,rs2214850,0.288  
7,32.986,rs6972136,0.288  
7,33.008,rs11767043,0.318  
7,33.048,rs4413678,0.310  
7,33.051,rs10268180,0.310  
7,33.068,rs2074633,0.307  
7,33.172,rs10225279,0.286  
7,33.217,rs1157350,0.248  
7,33.357,rs10253752,0.226  
7,33.572,rs7811056,0.191  
7,33.635,rs1548825,0.179  
7,33.697,rs1476944,0.169  
7,33.731,rs6955902,0.164  
7,33.753,rs2215857,0.161  
7,34.006,rs7802120,0.131  
7,34.019,rs10240229,0.129  
7,34.380,rs13221825,0.077  
7,34.434,rs4530935,0.089  
7,34.522,rs4721864,0.101  
7,34.554,rs12669202,0.097  
7,34.564,rs4721877,0.096  
7,34.605,rs2110328,0.104  
7,34.613,rs2390254,0.105  
7,34.659,rs6980121,0.112  
7,34.725,rs17142558,0.109  
7,34.788,rs1029600,0.110  
7,34.827,rs4721892,0.092  
7,34.888,rs3095208,0.095  
7,34.919,rs990528,0.099  
7,34.928,rs206187,0.101  
7,34.941,rs6974002,0.104  
7,34.989,rs10265149,0.130  
7,35.059,rs2074425,0.140  
7,35.091,rs2107128,0.143  
7,35.131,rs7796492,0.115  
7,35.138,rs6961781,0.116  
7,35.240,rs6461503,0.093  
7,35.294,rs999601,0.090  
7,35.340,rs17143131,0.101  
7,35.362,rs7805271,0.106  
7,35.362,rs1858944,0.106  
7,35.373,rs6461509,0.112  
7,35.410,rs2188594,0.113  
7,35.466,rs2529753,0.089  
7,35.660,rs17143466,0.122  
7,35.672,rs1155096,0.124  
7,35.691,rs2160093,0.123  
7,35.852,rs17676368,0.107  
7,35.865,rs3810892,0.106  
7,35.910,rs13438483,0.101  
7,35.952,rs6963278,0.097  
7,35.973,rs2215674,0.095  
7,36.122,rs4721981,0.082  
7,36.189,rs4721986,0.062  
7,36.244,rs10479786,0.060

7,36.294,rs4721998,0.053  
7,36.395,rs2529166,0.041  
7,36.399,rs1637308,0.041  
7,36.427,rs2057999,0.038  
7,36.534,rs10261327,0.026  
7,36.688,rs4722037,0.014  
7,36.713,rs6978629,0.013  
7,36.774,rs7779983,0.013  
7,36.835,rs6461593,0.009  
7,36.838,rs6975512,0.009  
7,36.851,rs2965387,0.008  
7,36.866,rs2033884,0.006  
7,36.907,rs6976078,0.004  
7,36.991,rs10485976,0.003  
7,37.076,rs2893049,0.002  
7,37.142,rs16873002,0.004  
7,37.146,rs2390592,0.004  
7,37.165,rs10485983,0.005  
7,37.194,rs11763291,0.007  
7,37.316,rs6461614,0.005  
7,37.335,rs1139225,0.005  
7,37.407,rs1406705,0.003  
7,37.481,rs2893061,0.002  
7,37.501,rs1174939,0.002  
7,37.549,rs7778988,0.003  
7,37.555,rs1175003,0.003  
7,37.609,rs1636296,0.003  
7,37.831,rs1636319,0.029  
7,37.979,rs2528907,0.029  
7,38.078,rs7784234,0.026  
7,38.130,rs7793513,0.024  
7,38.219,rs10267816,0.034  
7,38.296,rs1859800,0.045  
7,38.333,rs17146234,0.064  
7,38.336,rs7301,0.064  
7,38.337,rs3779069,0.050  
7,38.348,rs1859804,0.048  
7,38.422,rs17146377,0.030  
7,38.430,rs4719687,0.029  
7,38.514,rs17146521,0.022  
7,38.555,rs1636898,0.020  
7,38.642,rs2528804,0.018  
7,38.700,rs3094974,0.020  
7,38.746,rs4719696,0.022  
7,38.748,rs11761760,0.022  
7,38.849,rs2905346,0.032  
7,39.006,rs7805828,0.036  
7,39.023,rs10242595,0.036  
7,39.089,rs7810218,0.027  
7,39.175,rs6461674,0.030  
7,39.179,rs17147385,0.030  
7,39.302,rs6461679,0.031  
7,39.333,rs10488075,0.032  
7,39.389,rs17370204,0.033  
7,39.470,rs10950938,0.029  
7,39.480,rs11772019,0.020  
7,39.667,rs5029444,0.018  
7,39.864,rs6461743,0.007  
7,39.944,rs4719742,0.006  
7,39.961,rs10225926,0.005  
7,40.011,rs11975049,0.005

7,40.157,rs719158,0.003  
7,40.173,rs7806317,0.005  
7,40.275,rs272711,0.014  
7,40.414,rs13245518,0.012  
7,40.580,rs1012768,0.010  
7,40.615,rs2245657,0.009  
7,40.631,rs10253966,0.009  
7,40.637,rs17149382,0.009  
7,40.640,rs2722388,0.009  
7,40.643,rs2722396,0.009  
7,40.644,rs4722352,0.009  
7,40.657,rs9785009,0.010  
7,40.699,rs2521230,0.006  
7,40.714,rs4719773,0.002  
7,40.721,rs7778039,0.003  
7,40.788,rs11979343,0.003  
7,40.808,rs2240005,0.004  
7,40.848,rs1468185,0.004  
7,40.869,rs2106943,0.004  
7,40.933,rs8180767,0.011  
7,40.962,rs143,0.013  
7,40.985,rs6951637,0.011  
7,40.994,rs757139,0.010  
7,41.079,rs4722416,0.011  
7,41.090,rs10275560,0.014  
7,41.107,rs2526401,0.027  
7,41.111,rs39436,0.029  
7,41.114,rs12673033,0.030  
7,41.124,rs2717858,0.031  
7,41.183,rs11970814,0.042  
7,41.194,rs757202,0.044  
7,41.244,rs2107124,0.044  
7,41.261,rs2523090,0.043  
7,41.356,rs721316,0.042  
7,41.359,rs6966737,0.042  
7,41.472,rs2893205,0.057  
7,41.552,rs886800,0.062  
7,41.603,rs17151612,0.058  
7,41.892,rs17318255,0.035  
7,42.017,rs6956023,0.018  
7,42.029,rs11973020,0.023  
7,42.034,rs2952519,0.023  
7,42.041,rs2960818,0.021  
7,42.058,rs208553,0.018  
7,42.061,rs882101,0.017  
7,42.118,rs4719818,0.007  
7,42.240,rs10282436,0.002  
7,42.263,rs3823944,0.002  
7,42.268,rs7785415,0.001  
7,42.270,rs1451389,0.001  
7,42.308,rs6972699,0.001  
7,42.330,rs4719841,0.001  
7,42.338,rs745580,0.001  
7,42.425,rs6945001,0.003  
7,42.439,rs3814095,0.003  
7,42.465,rs4722585,0.004  
7,42.497,rs10236009,0.005  
7,42.575,rs12538280,0.005  
7,42.611,rs12534835,0.005  
7,42.619,rs1406754,0.004  
7,42.635,rs1468286,0.003

7,42.651,rs976346,0.007  
7,42.656,rs1229670,0.008  
7,42.704,rs916969,0.008  
7,42.710,rs12666750,0.008  
7,42.717,rs757393,0.007  
7,42.732,rs6461949,0.008  
7,42.733,rs6461951,0.008  
7,42.788,rs10486465,0.030  
7,42.791,rs10226436,0.035  
7,42.802,rs1005401,0.046  
7,42.806,rs10486467,0.046  
7,42.809,rs4722626,0.046  
7,42.861,rs17291131,0.049  
7,42.914,rs1023711,0.049  
7,43.012,rs213517,0.040  
7,43.023,rs13311400,0.039  
7,43.212,rs6949451,0.053  
7,43.228,rs11984297,0.054  
7,43.245,rs10486494,0.054  
7,43.313,rs11563582,0.063  
7,43.313,rs11564004,0.063  
7,43.314,rs6957104,0.063  
7,43.317,rs11980136,0.064  
7,43.343,rs6960719,0.065  
7,43.387,rs2074337,0.065  
7,43.416,rs757141,0.066  
7,43.462,rs17155332,0.066  
7,43.681,rs42101,0.064  
7,43.948,rs10266923,0.069  
7,43.950,rs17155987,0.069  
7,44.028,rs6948511,0.071  
7,44.099,rs6956423,0.072  
7,44.100,rs10486570,0.072  
7,44.108,rs38522,0.071  
7,44.108,rs38523,0.071  
7,44.108,rs6945134,0.071  
7,44.148,rs4722752,0.076  
7,44.169,rs17156253,0.080  
7,44.187,rs6462063,0.084  
7,44.229,rs11760530,0.093  
7,44.232,rs6977730,0.092  
7,44.268,rs17156416,0.087  
7,44.351,rs849336,0.075  
7,44.424,rs4722771,0.069  
7,44.454,rs177465,0.067  
7,44.493,rs849322,0.070  
7,44.517,rs1860758,0.053  
7,44.531,rs6973453,0.054  
7,44.605,rs10239810,0.029  
7,44.695,rs17156694,0.033  
7,44.708,rs177572,0.034  
7,44.726,rs1859020,0.035  
7,44.769,rs217503,0.031  
7,44.820,rs216730,0.028  
7,44.904,rs310338,0.017  
7,44.912,rs1637457,0.017  
7,44.934,rs160343,0.012  
7,44.946,rs41307,0.009  
7,44.971,rs41321,0.016  
7,44.981,rs42322,0.016  
7,45.026,rs982947,0.016

7,45.170,rs10486591,0.005  
7,45.332,rs2237361,0.003  
7,45.419,rs11975539,0.000  
7,45.491,rs12700916,0.000  
7,45.603,rs10216225,-0.004  
7,45.652,rs1006514,-0.016  
7,45.999,rs317710,-0.011  
7,46.001,rs320101,-0.011  
7,46.029,rs160862,-0.011  
7,46.074,rs2192508,-0.014  
7,46.102,rs323199,-0.015  
7,46.207,rs245874,-0.037  
7,46.208,rs17677737,-0.037  
7,46.236,rs245895,-0.036  
7,46.252,rs10256795,-0.034  
7,46.365,rs6944596,-0.028  
7,46.537,rs121724,-0.016  
7,46.628,rs39061,-0.015  
7,46.873,rs245974,-0.016  
7,47.017,rs3812354,-0.014  
7,47.069,rs2023908,-0.013  
7,47.094,rs2214569,-0.012  
7,47.247,rs1016726,-0.008  
7,47.319,rs7801318,-0.005  
7,47.463,rs2189439,0.000  
7,47.502,rs9648362,0.001  
7,47.596,rs849916,0.005  
7,47.713,rs10272160,0.012  
7,47.728,rs1362362,0.008  
7,47.737,rs7792461,0.002  
7,47.794,rs2024421,0.003  
7,47.880,rs10237982,0.003  
7,47.899,rs1420116,0.002  
7,47.906,rs7782330,0.002  
7,47.920,rs1641215,0.002  
7,48.029,rs6953643,0.002  
7,48.046,rs6462178,0.002  
7,48.074,rs174957,0.002  
7,48.102,rs2057902,0.002  
7,48.198,rs10488085,0.003  
7,48.477,rs7780166,0.003  
7,48.976,rs4722979,0.016  
7,49.044,rs13221972,0.016  
7,49.082,rs6947237,0.016  
7,49.121,rs6961625,0.018  
7,49.282,rs2906773,0.024  
7,49.360,rs10278906,0.023  
7,49.868,rs255108,0.006  
7,50.009,rs6966354,0.005  
7,50.044,rs7810199,0.004  
7,50.223,rs7780081,0.002  
7,50.310,rs1001733,-0.000  
7,50.377,rs10244884,-0.000  
7,50.423,rs4723034,-0.000  
7,50.447,rs2267723,-0.000  
7,50.612,rs1981701,-0.001  
7,50.666,rs12668955,-0.001  
7,50.666,rs2267727,-0.001  
7,50.679,rs1541516,-0.002  
7,50.707,rs2267737,-0.002  
7,50.707,rs2267738,-0.002

7, 50.758, rs1012440, -0.003  
7, 50.763, rs9792050, -0.003  
7, 50.791, rs4291168, -0.004  
7, 50.915, rs177982, -0.015  
7, 51.109, rs6942902, -0.023  
7, 51.233, rs7801993, -0.023  
7, 51.273, rs17395568, -0.023  
7, 51.305, rs17160114, -0.022  
7, 51.371, rs218148, -0.022  
7, 51.407, rs218112, -0.021  
7, 51.444, rs218092, -0.014  
7, 51.715, rs6949643, -0.024  
7, 51.766, rs1003405, -0.025  
7, 51.873, rs10258296, -0.026  
7, 51.947, rs2159688, -0.033  
7, 52.009, rs1548828, -0.039  
7, 52.031, rs11980485, -0.041  
7, 52.036, rs2058411, -0.038  
7, 52.038, rs17160544, -0.049  
7, 52.094, rs1860788, -0.067  
7, 52.130, rs7792024, -0.066  
7, 52.156, rs6462320, -0.065  
7, 52.160, rs7783129, -0.066  
7, 52.229, rs6462324, -0.077  
7, 52.279, rs11761910, -0.084  
7, 52.526, rs996134, -0.092  
7, 52.553, rs10274609, -0.093  
7, 52.637, rs6978495, -0.095  
7, 52.644, rs917454, -0.095  
7, 52.688, rs1860220, -0.120  
7, 52.714, rs2240674, -0.141  
7, 52.754, rs6945244, -0.142  
7, 53.028, rs7789565, -0.128  
7, 53.054, rs1868773, -0.124  
7, 53.062, rs399902, -0.123  
7, 53.084, rs6975016, -0.120  
7, 53.174, rs17161418, -0.131  
7, 53.305, rs17136990, -0.149  
7, 53.329, rs2392147, -0.149  
7, 53.387, rs12701264, -0.172  
7, 53.388, rs17161568, -0.172  
7, 53.497, rs9692508, -0.163  
7, 53.574, rs7793096, -0.157  
7, 53.694, rs12666901, -0.123  
7, 53.708, rs4637716, -0.119  
7, 53.731, rs10262995, -0.113  
7, 53.734, rs2392244, -0.109  
7, 53.744, rs2392246, -0.116  
7, 53.810, rs6954592, -0.096  
7, 53.811, rs17798136, -0.096  
7, 53.864, rs10259679, -0.083  
7, 53.878, rs12055962, -0.087  
7, 53.881, rs4723329, -0.088  
7, 53.894, rs11766089, -0.091  
7, 53.937, rs7457120, -0.093  
7, 53.953, rs315860, -0.094  
7, 53.973, rs1427483, -0.093  
7, 53.988, rs1427481, -0.092  
7, 54.019, rs9986855, -0.074  
7, 54.024, rs974937, -0.071  
7, 54.050, rs7806522, -0.071

7,54.058,rs1420328,-0.070  
7,54.088,rs918038,-0.059  
7,54.111,rs2058681,-0.054  
7,54.115,rs11486838,-0.052  
7,54.145,rs318628,-0.053  
7,54.147,rs318623,-0.053  
7,54.304,rs7792119,-0.042  
7,54.305,rs7792581,-0.042  
7,54.306,rs1468559,-0.042  
7,54.316,rs7798886,-0.042  
7,54.317,rs2041301,-0.041  
7,54.389,rs10951423,-0.038  
7,54.401,rs7800859,-0.038  
7,54.410,rs1023556,-0.038  
7,54.423,rs2531841,-0.037  
7,54.488,rs1419868,-0.046  
7,54.489,rs12111597,-0.046  
7,54.489,rs17789834,-0.047  
7,54.512,rs7804942,-0.057  
7,54.518,rs10252228,-0.059  
7,54.538,rs1649220,-0.067  
7,54.672,rs6976218,-0.115  
7,54.744,rs13239224,-0.088  
7,54.765,rs340383,-0.084  
7,54.880,rs13228642,-0.070  
7,54.888,rs342990,-0.069  
7,55.017,rs1035218,-0.059  
7,55.040,rs10486666,-0.058  
7,55.088,rs12111746,-0.054  
7,55.096,rs6962286,-0.053  
7,55.150,rs6979267,-0.053  
7,55.229,rs4640967,-0.052  
7,55.314,rs2392376,-0.052  
7,55.583,rs12673861,-0.052  
7,55.811,rs6980161,-0.051  
7,55.960,rs10281852,-0.051  
7,56.011,rs6462639,-0.044  
7,56.071,rs2700936,-0.036  
7,56.167,rs12537099,-0.032  
7,56.236,rs2726070,-0.029  
7,56.288,rs2726055,-0.025  
7,56.425,rs2098368,-0.016  
7,56.509,rs196579,-0.018  
7,56.518,rs196584,-0.018  
7,56.561,rs13224904,-0.017  
7,56.653,rs197324,-0.016  
7,56.775,rs3801314,-0.011  
7,56.874,rs11763746,-0.002  
7,56.897,rs7808209,-0.001  
7,56.927,rs6942586,-0.002  
7,56.960,rs2392445,-0.009  
7,57.002,rs3801299,-0.009  
7,57.109,rs2392452,-0.014  
7,57.129,rs2727810,-0.014  
7,57.165,rs2001599,-0.012  
7,57.178,rs1962611,-0.012  
7,57.220,rs4504543,-0.011  
7,57.271,rs12672188,-0.011  
7,57.379,rs3807609,-0.010  
7,57.419,rs4720217,-0.009  
7,57.541,rs6948589,-0.006



7,57.583,rs759415,-0.006  
7,57.690,rs17170765,-0.008  
7,57.767,rs10240126,-0.011  
7,57.793,rs1986858,-0.011  
7,58.189,rs10265823,-0.022  
7,58.253,rs6946785,-0.024  
7,58.370,rs10951511,-0.027  
7,58.490,rs2723996,-0.026  
7,58.515,rs2724002,-0.035  
7,58.521,rs3847015,-0.027  
7,58.527,rs2723978,-0.027  
7,58.550,rs2717947,-0.025  
7,58.575,rs2724012,-0.026  
7,58.581,rs1882079,-0.026  
7,58.665,rs1882074,-0.017  
7,58.671,rs6964474,-0.017  
7,58.675,rs7788477,-0.016  
7,58.725,rs10280643,-0.014  
7,58.726,rs10267165,-0.014  
7,58.747,rs17171046,-0.019  
7,58.770,rs1882072,-0.026  
7,58.773,rs10488653,-0.027  
7,58.778,rs1731989,-0.029  
7,58.779,rs4548075,-0.029  
7,58.792,rs10215851,-0.034  
7,58.837,rs11763394,-0.039  
7,58.947,rs2392510,-0.024  
7,58.954,rs2257053,-0.023  
7,59.007,rs1530818,-0.017  
7,59.015,rs10261983,-0.027  
7,59.038,rs2598124,-0.019  
7,59.040,rs2598119,-0.018  
7,59.057,rs2598107,-0.005  
7,59.066,rs1047785,-0.002  
7,59.085,rs9986874,-0.001  
7,59.116,rs1524071,-0.001  
7,59.154,rs940347,0.000  
7,59.336,rs6944227,0.005  
7,59.590,rs2159499,0.012  
7,59.607,rs4720273,0.012  
7,59.633,rs2248839,0.007  
7,59.634,rs2736969,0.007  
7,59.639,rs11769443,0.006  
7,59.641,rs17171331,0.006  
7,59.661,rs2080284,0.004  
7,59.683,rs4720279,0.003  
7,59.704,rs2196679,0.004  
7,59.712,rs2028209,0.004  
7,59.723,rs1561308,0.005  
7,59.728,rs4427071,0.005  
7,59.737,rs6948732,0.010  
7,59.743,rs6945114,0.015  
7,59.745,rs10278233,0.016  
7,59.764,rs6951440,0.027  
7,59.773,rs17171431,0.028  
7,59.776,rs2116666,0.028  
7,59.776,rs13242754,0.028  
7,59.827,rs3801135,0.014  
7,60.123,rs859524,0.014  
7,60.432,rs6959715,0.012  
7,60.581,rs7777684,0.017

7,60.598,rs3923506,0.017  
7,60.676,rs12701716,0.020  
7,60.788,rs10951603,0.025  
7,60.873,rs1558162,0.027  
7,60.885,rs6962246,0.028  
7,60.946,rs17770427,0.017  
7,61.022,rs7795004,0.015  
7,61.035,rs2008819,0.015  
7,61.114,rs10486804,0.017  
7,61.150,rs7458148,0.018  
7,61.207,rs4720341,0.019  
7,61.281,rs12701773,0.019  
7,61.550,rs6462962,0.021  
7,61.604,rs6964864,0.021  
7,61.702,rs11761602,0.013  
7,61.734,rs17171705,0.011  
7,61.788,rs10229414,0.010  
7,61.825,rs4320458,0.008  
7,61.903,rs740214,0.009  
7,61.941,rs6462986,0.010  
7,61.971,rs10282661,0.010  
7,62.119,rs2302025,0.009  
7,62.183,rs7801303,0.010  
7,62.193,rs6957465,0.008  
7,62.201,rs11767531,0.005  
7,62.202,rs10241209,0.004  
7,62.203,rs11767956,0.003  
7,62.208,rs29871,0.000  
7,62.273,rs2214880,-0.006  
7,62.281,rs10229451,-0.007  
7,62.364,rs2190346,-0.006  
7,62.547,rs10242681,-0.030  
7,62.585,rs431998,-0.029  
7,62.614,rs11768528,-0.028  
7,62.729,rs17774532,-0.040  
7,62.760,rs273124,-0.042  
7,62.809,rs900365,-0.041  
7,62.917,rs2035425,-0.035  
7,63.358,rs6961184,-0.036  
7,63.390,rs4724065,-0.037  
7,63.432,rs3886608,-0.039  
7,63.435,rs29694,-0.039  
7,63.439,rs7805291,-0.030  
7,63.440,rs10234024,-0.024  
7,63.440,rs6965030,-0.020  
7,63.494,rs4724086,-0.018  
7,63.640,rs846327,-0.006  
7,63.700,rs9986932,-0.006  
7,63.838,rs17172014,-0.006  
7,63.847,rs846398,-0.006  
7,63.888,rs12668912,-0.000  
7,63.973,rs2286294,-0.001  
7,64.062,rs3801220,-0.000  
7,64.204,rs10277168,0.005  
7,64.310,rs13233071,0.001  
7,64.489,rs6954249,0.003  
7,64.508,rs12530988,0.003  
7,64.634,rs4050289,0.000  
7,64.642,rs4143614,-0.000  
7,64.645,rs17172073,-0.000  
7,64.674,rs1524594,-0.001

7,64.717,rs17543692,-0.000  
7,64.721,rs965739,-0.000  
7,64.732,rs12113398,-0.000  
7,64.738,rs2656510,-0.000  
7,64.739,rs11984213,-0.000  
7,64.762,rs17172123,0.000  
7,64.793,rs10486743,0.001  
7,64.804,rs596167,0.001  
7,64.821,rs17722435,0.002  
7,64.851,rs2190947,0.003  
7,64.854,rs6978743,0.002  
7,64.865,rs6957566,0.000  
7,64.905,rs1029482,0.001  
7,64.936,rs11771692,0.001  
7,64.945,rs2301871,0.001  
7,64.999,rs6968910,0.000  
7,65.070,rs10281361,0.000  
7,65.081,rs12702041,-0.000  
7,65.123,rs6463191,-0.002  
7,65.136,rs2304328,-0.002  
7,65.149,rs10229477,-0.002  
7,65.466,rs10250233,-0.005  
7,65.513,rs2232108,-0.004  
7,65.568,rs2595647,-0.004  
7,65.692,rs7778745,-0.003  
7,65.713,rs9784990,-0.003  
7,65.797,rs2268576,-0.003  
7,65.867,rs3757840,-0.001  
7,65.944,rs3757836,-0.000  
7,66.014,rs4724298,-0.000  
7,66.083,rs9918696,0.000  
7,66.498,rs1434960,0.013  
7,66.506,rs1055967,0.013  
7,66.592,rs740094,0.015  
7,66.620,rs799434,0.013  
7,66.622,rs757694,0.013  
7,66.671,rs2331175,0.010  
7,66.734,rs2877301,0.009  
7,67.046,rs10278144,0.013  
7,67.129,rs1294935,0.036  
7,67.152,rs11761143,0.040  
7,67.158,rs1294910,0.041  
7,67.160,rs1294906,0.040  
7,67.174,rs1294889,0.028  
7,67.174,rs12666793,0.028  
7,67.187,rs1294875,0.030  
7,67.270,rs2040863,0.040  
7,67.335,rs799707,0.042  
7,67.398,rs12702136,0.042  
7,67.564,rs1917716,0.041  
7,67.667,rs4724400,0.039  
7,67.669,rs1534131,0.039  
7,67.745,rs1525655,0.053  
7,67.964,rs868362,0.044  
7,67.974,rs2471226,0.056  
7,67.974,rs10268339,0.056  
7,68.087,rs2471267,0.035  
7,68.091,rs10249706,0.035  
7,68.394,rs4619,0.029  
7,68.477,rs1496499,0.035  
7,68.649,rs812570,0.030

7,68.727,rs10499642,0.037  
7,68.730,rs7794166,0.037  
7,68.777,rs7778867,0.046  
7,68.781,rs6976880,0.046  
7,68.841,rs10280823,0.037  
7,68.849,rs1966956,0.035  
7,68.933,rs10234423,0.026  
7,69.002,rs10243723,0.019  
7,69.036,rs723149,0.017  
7,69.084,rs17172727,0.018  
7,69.085,rs983398,0.018  
7,69.107,rs993183,0.017  
7,69.129,rs12540816,0.010  
7,69.147,rs856563,0.004  
7,69.201,rs7789758,0.002  
7,69.263,rs1525235,0.002  
7,69.269,rs4415228,0.002  
7,69.293,rs12702267,0.003  
7,69.342,rs11767105,0.002  
7,69.344,rs17172793,0.002  
7,69.350,rs4724521,0.002  
7,69.374,rs6959020,0.002  
7,69.375,rs10487768,0.002  
7,69.416,rs2286117,0.003  
7,69.448,rs874321,0.004  
7,69.458,rs1866361,0.004  
7,69.553,rs2470998,0.025  
7,69.567,rs12537130,0.027  
7,69.589,rs2177795,0.027  
7,69.612,rs834602,0.027  
7,69.691,rs17172860,0.027  
7,69.707,rs1799384,0.026  
7,69.745,rs7793087,0.023  
7,69.792,rs2964955,0.030  
7,69.864,rs586005,0.016  
7,69.954,rs675242,0.012  
7,70.057,rs6974363,0.002  
7,70.097,rs13235604,0.005  
7,70.106,rs2347990,0.001  
7,70.114,rs7792269,0.001  
7,70.124,rs6947796,0.001  
7,70.127,rs12702367,0.000  
7,70.140,rs4720613,0.001  
7,70.145,rs17545132,0.001  
7,70.146,rs6953403,0.001  
7,70.166,rs3800568,0.000  
7,70.167,rs17659820,0.000  
7,70.181,rs2053986,0.000  
7,70.183,rs1554495,0.000  
7,70.209,rs2686821,0.000  
7,70.224,rs2307252,0.000  
7,70.317,rs1526105,0.000  
7,70.349,rs17712647,0.001  
7,70.353,rs713061,0.001  
7,70.364,rs17661843,0.001  
7,70.376,rs1560792,0.000  
7,70.383,rs2060330,0.000  
7,70.383,rs6945363,0.000  
7,70.399,rs4083233,0.001  
7,70.471,rs3812250,0.001  
7,70.478,rs4540359,0.002

7,70.484,rs6975165,0.001  
7,70.487,rs4363147,0.000  
7,70.526,rs4557646,0.000  
7,70.553,rs17132771,-0.000  
7,70.580,rs17132823,-0.000  
7,70.617,rs4244231,-0.000  
7,70.642,rs4917199,0.000  
7,70.666,rs7792833,0.000  
7,70.694,rs1155875,-0.002  
7,70.808,rs12056112,-0.008  
7,70.946,rs10250376,-0.009  
7,71.091,rs10263065,-0.008  
7,71.166,rs7778595,-0.008  
7,71.191,rs12718193,-0.007  
7,71.395,rs10251209,-0.005  
7,71.412,rs9642306,-0.005  
7,71.446,rs7796855,-0.016  
7,71.462,rs6971984,-0.016  
7,71.543,rs10263787,-0.015  
7,71.552,rs727051,-0.015  
7,71.567,rs1365086,-0.015  
7,71.656,rs10499687,-0.014  
7,71.715,rs12536329,-0.012  
7,71.772,rs6968993,-0.012  
7,72.150,rs11761913,-0.033  
7,72.205,rs13241213,-0.037  
7,72.227,rs10276619,-0.039  
7,72.352,rs7785321,-0.051  
7,72.376,rs7780012,-0.053  
7,72.532,rs1376523,-0.056  
7,72.585,rs10499694,-0.057  
7,72.687,rs2237444,-0.058  
7,72.904,rs1015573,-0.053  
7,72.917,rs4947921,-0.052  
7,72.917,rs17134051,-0.052  
7,72.922,rs4947475,-0.049  
7,72.942,rs12718959,-0.040  
7,73.143,rs6956095,-0.074  
7,73.160,rs2240090,-0.074  
7,73.179,rs7804820,-0.075  
7,73.191,rs10248051,-0.075  
7,73.218,rs17799219,-0.076  
7,73.249,rs10156067,-0.075  
7,73.331,rs10231416,-0.074  
7,73.644,rs6969097,-0.065  
7,73.789,rs12540310,-0.055  
7,73.824,rs17734557,-0.053  
7,73.998,rs758671,-0.026  
7,74.028,rs11765942,-0.019  
7,74.028,rs13226225,-0.019  
7,74.031,rs4947627,-0.019  
7,74.062,rs6973521,-0.020  
7,74.089,rs7786795,-0.022  
7,74.198,rs12718545,-0.028  
7,74.246,rs595846,-0.026  
7,74.272,rs1473654,-0.031  
7,74.305,rs759002,-0.038  
7,74.332,rs1525429,-0.039  
7,74.376,rs10254486,-0.040  
7,74.522,rs2113636,-0.035  
7,74.559,rs4947685,-0.033

7,74.586,rs1863081,-0.032  
7,74.600,rs10279635,-0.031  
7,74.633,rs2952763,-0.031  
7,74.691,rs4273801,-0.039  
7,74.882,rs6971252,-0.038  
7,74.920,rs1121768,-0.037  
7,75.000,rs10248355,-0.037  
7,75.087,rs2961030,-0.038  
7,75.137,rs10272941,-0.041  
7,75.145,rs1358603,-0.041  
7,75.149,rs6965436,-0.041  
7,75.224,rs971648,-0.055  
7,75.242,rs6946114,-0.061  
7,75.264,rs13246506,-0.068  
7,75.306,rs10248576,-0.083  
7,75.326,rs10239546,-0.089  
7,75.333,rs12718725,-0.090  
7,75.409,rs4947777,-0.103  
7,75.423,rs880048,-0.103  
7,75.428,rs1174864,-0.103  
7,75.464,rs6973717,-0.096  
7,75.473,rs6954000,-0.096  
7,75.530,rs17558136,-0.090  
7,75.546,rs10246618,-0.091  
7,75.601,rs11768111,-0.109  
7,75.662,rs9656687,-0.129  
7,75.693,rs2330583,-0.127  
7,75.718,rs13235506,-0.127  
7,75.768,rs12536631,-0.126  
7,75.803,rs12668378,-0.126  
7,75.822,rs17136044,-0.114  
7,75.882,rs11238298,-0.079  
7,75.894,rs1996991,-0.079  
7,76.017,rs507047,-0.078  
7,76.034,rs964823,-0.078  
7,76.044,rs12533009,-0.079  
7,76.047,rs1153922,-0.080  
7,76.052,rs1454524,-0.081  
7,76.066,rs10793421,-0.084  
7,76.067,rs582252,-0.069  
7,76.072,rs1569267,-0.071  
7,76.074,rs10499748,-0.072  
7,76.115,rs7805129,-0.098  
7,76.151,rs2699215,-0.109  
7,76.159,rs2699236,-0.112  
7,76.202,rs9691864,-0.111  
7,76.262,rs12055922,-0.110  
7,76.303,rs887811,-0.108  
7,76.395,rs10488137,-0.106  
7,76.479,rs7780270,-0.104  
7,76.498,rs4947490,-0.103  
7,76.535,rs2058502,-0.100  
7,76.566,rs13244925,-0.103  
7,76.591,rs6969570,-0.107  
7,76.597,rs887824,-0.109  
7,76.703,rs1554718,-0.130  
7,76.811,rs4947993,-0.131  
7,76.817,rs4947995,-0.112  
7,77.106,rs10282700,-0.081  
7,77.189,rs1568824,-0.083  
7,77.406,rs4245569,-0.060

7,77.408,rs7795911,-0.061  
7,77.431,rs4621761,-0.064  
7,77.526,rs6593287,-0.091  
7,77.609,rs13238899,-0.089  
7,77.622,rs816411,-0.088  
7,77.669,rs698626,-0.088  
7,77.683,rs10232581,-0.088  
7,77.779,rs7806502,-0.085  
7,77.868,rs10282225,-0.067  
7,78.058,rs13240443,-0.054  
7,78.104,rs13223276,-0.054  
7,78.120,rs6953819,-0.056  
7,78.219,rs7809798,-0.087  
7,78.281,rs9649680,-0.092  
7,78.501,rs13242011,-0.061  
7,78.578,rs12667898,-0.058  
7,78.600,rs1524616,-0.057  
7,78.681,rs7779067,-0.076  
7,78.719,rs17139478,-0.078  
7,78.783,rs7796427,-0.080  
7,78.802,rs13226579,-0.078  
7,78.807,rs2862876,-0.078  
7,78.810,rs10234472,-0.077  
7,78.827,rs1581570,-0.073  
7,78.902,rs2900856,-0.061  
7,78.917,rs4718223,-0.061  
7,78.920,rs10253900,-0.060  
7,79.006,rs10273658,-0.054  
7,79.196,rs17145225,-0.020  
7,79.222,rs4618582,-0.016  
7,79.270,rs7810927,-0.014  
7,79.339,rs10950078,-0.012  
7,79.411,rs716578,-0.011  
7,79.413,rs10261724,-0.011  
7,79.531,rs2530416,-0.008  
7,79.559,rs12698617,-0.009  
7,79.613,rs6948905,-0.007  
7,79.678,rs7805713,-0.007  
7,79.816,rs6971526,-0.007  
7,79.850,rs13240999,-0.005  
7,79.862,rs7791037,-0.004  
7,79.875,rs6958698,-0.004  
7,79.901,rs6971706,-0.004  
7,79.918,rs6969045,-0.004  
7,79.995,rs4718697,-0.025  
7,80.048,rs2642148,-0.029  
7,80.069,rs6968714,-0.029  
7,80.080,rs4718709,-0.025  
7,80.103,rs6979453,-0.017  
7,80.107,rs7777871,-0.016  
7,80.123,rs12672105,-0.013  
7,80.131,rs1990351,-0.013  
7,80.149,rs12535104,-0.006  
7,80.225,rs3113126,-0.002  
7,80.283,rs940597,-0.004  
7,80.337,rs10259019,-0.004  
7,80.392,rs12532549,-0.005  
7,80.425,rs2868540,-0.005  
7,80.438,rs7796950,-0.005  
7,80.471,rs903527,-0.006  
7,80.557,rs17670378,-0.007

7,80.740,rs10226192,-0.009  
7,80.832,rs1522499,-0.009  
7,80.957,rs4499981,-0.007  
7,81.031,rs10280848,-0.004  
7,81.134,rs4718801,-0.003  
7,81.400,rs12534964,-0.000  
7,81.615,rs2527636,0.001  
7,81.731,rs2191749,0.007  
7,81.760,rs1476865,0.009  
7,81.770,rs7805438,0.010  
7,81.781,rs2024237,0.009  
7,81.806,rs3113288,0.008  
7,81.833,rs10464191,0.022  
7,81.843,rs1195227,0.022  
7,81.863,rs1718582,0.016  
7,81.867,rs10228728,0.016  
7,81.880,rs12056012,0.017  
7,81.896,rs10265054,0.017  
7,82.165,rs10237984,0.005  
7,82.614,rs12672930,-0.001  
7,82.703,rs10486878,-0.002  
7,82.755,rs4717530,-0.002  
7,82.765,rs10486873,-0.002  
7,82.833,rs734930,-0.001  
7,82.855,rs12533226,-0.000  
7,82.858,rs17141782,-0.000  
7,82.877,rs38313,0.000  
7,82.880,rs723980,0.000  
7,82.896,rs7459368,0.000  
7,82.917,rs11979094,0.000  
7,82.936,rs6961823,0.000  
7,82.938,rs17141982,0.000  
7,82.941,rs10257489,0.000  
7,82.973,rs3923606,0.005  
7,83.021,rs2178044,0.008  
7,83.034,rs6947003,0.010  
7,83.064,rs4717554,0.013  
7,83.115,rs1527592,0.013  
7,83.158,rs1918425,0.013  
7,83.216,rs1568862,0.012  
7,83.250,rs2049475,0.013  
7,83.270,rs4717577,0.013  
7,83.299,rs4479997,0.015  
7,83.320,rs6460638,0.016  
7,83.340,rs4717580,0.018  
7,83.387,rs2867041,0.021  
7,83.408,rs10271414,0.024  
7,83.448,rs10237940,0.040  
7,83.468,rs7811880,0.038  
7,83.479,rs11772787,0.040  
7,83.481,rs4719095,0.040  
7,83.501,rs1202640,0.050  
7,83.533,rs4446620,0.053  
7,84.234,rs917111,0.096  
7,84.313,rs7798395,0.102  
7,84.454,rs4388345,0.101  
7,84.494,rs7808818,0.101  
7,84.513,rs6955186,0.089  
7,84.541,rs6973852,0.072  
7,84.573,rs10950267,0.057  
7,84.593,rs10237977,0.040



7,84.600,rs6460677,0.035  
7,84.624,rs4717626,0.028  
7,84.725,rs3846985,0.013  
7,84.857,rs4128154,0.015  
7,84.868,rs6961002,0.009  
7,84.873,rs993932,0.009  
7,84.883,rs2968509,0.009  
7,85.102,rs4717678,0.008  
7,85.145,rs11974621,0.010  
7,85.503,rs1880948,0.024  
7,85.728,rs2074754,0.031  
7,85.851,rs17341242,0.029  
7,85.961,rs6974424,0.025  
7,85.995,rs2884050,0.034  
7,86.066,rs4717104,0.032  
7,86.109,rs11764572,0.032  
7,86.246,rs13244770,0.030  
7,86.273,rs4717827,0.029  
7,86.298,rs12538362,0.029  
7,86.350,rs12530707,0.032  
7,86.438,rs6948963,0.038  
7,86.477,rs4717865,0.038  
7,86.499,rs2856728,0.039  
7,86.524,rs1091813,0.038  
7,86.589,rs178413,0.036  
7,86.644,rs223014,0.035  
7,86.800,rs17145361,0.029  
7,86.918,rs10949838,0.025  
7,86.960,rs37630,0.025  
7,86.990,rs2267824,0.026  
7,87.079,rs13238568,0.009  
7,87.743,rs1167795,0.006  
7,87.747,rs6964720,0.005  
7,87.766,rs237238,0.004  
7,87.772,rs807874,0.004  
7,87.780,rs17149227,0.005  
7,87.784,rs7794510,0.005  
7,87.809,rs17353131,0.009  
7,87.822,rs4728147,0.011  
7,87.833,rs6965172,0.010  
7,87.873,rs12538253,0.009  
7,87.938,rs2024049,0.012  
7,87.969,rs3898649,0.014  
7,87.989,rs239953,0.017  
7,88.005,rs4732513,0.019  
7,88.099,rs9649679,0.028  
7,88.215,rs758944,0.041  
7,88.247,rs10272095,0.049  
7,88.276,rs2286428,0.057  
7,88.279,rs3789833,0.057  
7,88.355,rs10952955,0.057  
7,88.505,rs12540927,0.060  
7,88.629,rs10278476,0.052  
7,88.740,rs10252204,0.032  
7,88.849,rs1726576,0.026  
7,88.856,rs2068031,0.027  
7,88.908,rs2868784,0.033  
7,89.157,rs7953,0.040  
7,89.243,rs17158641,0.047  
7,89.521,rs3807723,0.060  
7,89.551,rs3779300,0.059

7,89.588,rs2074646,0.057  
7,89.668,rs3807689,0.054  
7,89.817,rs3823778,0.050  
7,89.852,rs1829989,0.044  
7,89.892,rs17149959,0.042  
7,90.064,rs798319,0.031  
7,90.179,rs798337,0.032  
7,90.270,rs798285,0.043  
7,90.340,rs798309,0.038  
7,90.408,rs17150562,0.032  
7,90.463,rs7802036,0.028  
7,90.675,rs2191330,0.027  
7,90.732,rs12154832,0.025  
7,90.757,rs10266582,0.042  
7,90.761,rs10485887,0.045  
7,90.817,rs2160321,0.048  
7,90.867,rs7789215,0.077  
7,90.930,rs13227908,0.083  
7,90.930,rs322006,0.042  
7,90.955,rs321983,0.058  
7,90.975,rs7791589,0.051  
7,91.017,rs4370470,0.047  
7,91.082,rs37854,0.041  
7,91.102,rs1207887,0.040  
7,91.110,rs17151525,0.038  
7,91.179,rs508990,0.025  
7,91.182,rs1799025,0.025  
7,91.216,rs918285,0.023  
7,91.227,rs12705836,0.033  
7,91.375,rs17407075,0.022  
7,91.382,rs7809986,0.023  
7,91.807,rs4730838,0.024  
7,91.895,rs12111889,0.031  
7,91.922,rs7788571,0.032  
7,92.057,rs2365693,0.027  
7,92.108,rs2714703,0.024  
7,92.501,rs886364,0.012  
7,92.549,rs10274707,0.011  
7,92.618,rs2886609,0.009  
7,92.645,rs306699,0.009  
7,92.650,rs306705,0.009  
7,92.661,rs306694,0.009  
7,92.705,rs304733,0.010  
7,92.749,rs304774,0.010  
7,92.797,rs6467158,0.011  
7,92.836,rs12671431,0.010  
7,92.889,rs6959775,0.013  
7,92.890,rs7455906,0.013  
7,92.897,rs4112274,0.013  
7,92.964,rs1722504,0.010  
7,93.007,rs3211881,0.009  
7,93.085,rs1358340,0.009  
7,93.096,rs1058425,0.010  
7,93.114,rs13224811,0.012  
7,93.165,rs2040908,0.007  
7,93.177,rs4731861,0.006  
7,93.180,rs1016840,0.011  
7,93.217,rs765764,0.021  
7,93.314,rs1358503,0.042  
7,93.337,rs853048,0.027  
7,93.371,rs853107,0.020

7,93.470,rs4096939,0.015  
7,93.494,rs3847122,0.016  
7,93.544,rs7797400,0.018  
7,93.570,rs2190296,0.006  
7,93.573,rs327718,0.005  
7,93.674,rs7790316,0.002  
7,93.679,rs765619,0.002  
7,93.805,rs2967917,0.001  
7,93.844,rs10273273,0.001  
7,93.955,rs12532699,-0.000  
7,94.058,rs2114736,-0.000  
7,94.132,rs1029568,-0.001  
7,94.148,rs17155381,-0.001  
7,94.148,rs10257149,-0.001  
7,94.217,rs5745696,-0.001  
7,94.291,rs3735520,-0.007  
7,94.374,rs17155547,-0.010  
7,94.477,rs1922073,-0.014  
7,94.614,rs12668403,-0.024  
7,94.668,rs37093,-0.028  
7,94.850,rs258651,-0.033  
7,94.873,rs258684,-0.034  
7,94.932,rs258710,-0.039  
7,94.953,rs3801740,-0.043  
7,94.972,rs38536,-0.043  
7,95.024,rs13235513,-0.044  
7,95.070,rs2367914,-0.047  
7,95.202,rs740340,-0.051  
7,95.262,rs42054,-0.041  
7,95.343,rs10272528,-0.042  
7,95.360,rs3801682,-0.043  
7,95.411,rs17156280,-0.046  
7,95.481,rs6965042,-0.051  
7,95.664,rs6467906,-0.030  
7,95.678,rs10486972,-0.029  
7,95.725,rs1034784,-0.027  
7,95.833,rs757134,-0.021  
7,95.941,rs7806760,-0.026  
7,95.964,rs9642144,-0.026  
7,95.980,rs10250565,-0.025  
7,96.092,rs12668093,-0.018  
7,96.266,rs10808302,-0.009  
7,96.312,rs9690648,-0.008  
7,96.442,rs10487657,-0.013  
7,96.444,rs6946469,-0.006  
7,96.444,rs10954712,-0.008  
7,96.444,rs7783211,-0.012  
7,96.449,rs13224075,-0.023  
7,96.449,rs17157388,-0.023  
7,96.450,rs9656547,-0.024  
7,96.788,rs2255872,-0.024  
7,97.012,rs215311,-0.014  
7,97.240,rs1181370,-0.008  
7,97.403,rs6949364,-0.002  
7,97.433,rs6467966,-0.004  
7,97.448,rs6953094,-0.007  
7,97.468,rs1526491,-0.008  
7,97.614,rs6467970,-0.001  
7,97.623,rs1526483,-0.001  
7,97.680,rs10954737,-0.000  
7,97.741,rs701308,0.000

7,97.802,rs797821,0.000  
7,97.993,rs2691694,0.000  
7,98.038,rs3823911,0.000  
7,98.132,rs17158686,-0.000  
7,98.142,rs12666837,-0.000  
7,98.142,rs10261069,-0.000  
7,98.226,rs7802925,-0.000  
7,98.280,rs594533,-0.000  
7,98.298,rs1534573,-0.003  
7,98.300,rs4560742,-0.003  
7,98.388,rs2190208,-0.003  
7,98.462,rs11771648,-0.011  
7,98.497,rs7805482,-0.016  
7,98.507,rs2463468,-0.016  
7,98.547,rs1852697,-0.013  
7,98.663,rs13246206,-0.005  
7,98.760,rs2726001,-0.007  
7,98.784,rs10245061,-0.008  
7,98.830,rs10243282,-0.024  
7,99.017,rs6965526,-0.028  
7,99.041,rs1405879,-0.025  
7,99.106,rs724224,-0.015  
7,99.160,rs2237565,-0.021  
7,99.318,rs17766292,-0.012  
7,99.330,rs10227182,-0.013  
7,99.410,rs4148828,-0.020  
7,99.415,rs31670,-0.021  
7,99.444,rs6946119,-0.021  
7,99.461,rs12720066,-0.018  
7,99.470,rs2235023,-0.016  
7,99.483,rs3789243,-0.013  
7,99.628,rs10239100,-0.012  
7,99.645,rs1688890,-0.012  
7,99.694,rs10238083,-0.005  
7,99.733,rs7792913,-0.005  
7,99.772,rs8122,-0.002  
7,99.786,rs12534694,-0.002  
7,99.840,rs181123,-0.001  
7,99.872,rs4728755,-0.001  
7,99.879,rs6977770,-0.001  
7,99.892,rs2519523,-0.001  
7,99.951,rs2098278,0.000  
7,100.168,rs12113884,0.001  
7,100.180,rs1557917,0.002  
7,100.185,rs12672637,0.001  
7,100.214,rs10486887,-0.003  
7,100.222,rs6959888,-0.000  
7,100.340,rs12704428,-0.000  
7,100.396,rs7781087,-0.000  
7,100.425,rs6465186,-0.000  
7,100.455,rs10279101,-0.000  
7,100.507,rs1208853,-0.001  
7,100.532,rs17168262,-0.001  
7,100.551,rs38964,-0.001  
7,100.606,rs6966330,-0.002  
7,100.692,rs17617686,-0.003  
7,100.779,rs3922360,-0.008  
7,100.912,rs968908,-0.009  
7,100.973,rs7805617,-0.012  
7,100.993,rs7801279,-0.012  
7,100.996,rs12535381,-0.013

7,101.017,rs1024557,-0.022  
7,101.018,rs6952332,-0.022  
7,101.019,rs757951,-0.023  
7,101.060,rs10226014,-0.023  
7,101.074,rs12704526,-0.024  
7,101.098,rs177667,-0.028  
7,101.104,rs17867259,-0.028  
7,101.106,rs11563855,-0.029  
7,101.914,rs2286696,-0.015  
7,102.089,rs705346,-0.020  
7,102.090,rs1358101,-0.020  
7,102.118,rs17163534,-0.025  
7,102.148,rs705352,-0.029  
7,102.172,rs696267,-0.033  
7,102.214,rs10488002,-0.034  
7,102.224,rs3735649,-0.034  
7,102.339,rs1464000,-0.038  
7,102.350,rs4236518,-0.039  
7,102.360,rs4554397,-0.040  
7,102.367,rs11970859,-0.039  
7,102.425,rs6465306,-0.037  
7,102.489,rs1346665,-0.032  
7,102.549,rs1344708,-0.042  
7,102.640,rs4329209,-0.049  
7,102.896,rs10236483,-0.077  
7,102.981,rs6977036,-0.071  
7,102.982,rs4729040,-0.093  
7,103.073,rs2079147,-0.083  
7,103.381,rs13229771,-0.101  
7,103.418,rs2188513,-0.103  
7,103.472,rs723668,-0.115  
7,103.474,rs4294124,-0.116  
7,103.739,rs10488537,-0.167  
7,103.797,rs2188404,-0.176  
7,103.867,rs10233804,-0.170  
7,103.885,rs11765782,-0.164  
7,103.891,rs17165334,-0.165  
7,103.900,rs2106431,-0.165  
7,103.948,rs1801197,-0.145  
7,103.978,rs2214213,-0.132  
7,103.980,rs6465381,-0.132  
7,104.017,rs2074120,-0.130  
7,104.428,rs1557659,-0.137  
7,104.504,rs8180847,-0.135  
7,104.674,rs2519609,-0.097  
7,104.785,rs2519630,-0.079  
7,104.789,rs2724117,-0.080  
7,104.966,rs17165845,-0.057  
7,104.989,rs2724113,-0.054  
7,105.004,rs17165876,-0.050  
7,105.019,rs17303650,-0.046  
7,105.055,rs17165948,-0.038  
7,105.095,rs7794610,-0.028  
7,105.115,rs10215958,-0.030  
7,105.120,rs41532,-0.026  
7,105.124,rs3286,-0.022  
7,105.144,rs41542,-0.026  
7,105.177,rs11973087,-0.034  
7,105.293,rs7782469,-0.041  
7,105.323,rs2157811,-0.044  
7,105.325,rs1557658,-0.058

7,105.357,rs7792596,-0.069  
7,105.386,rs369982,-0.048  
7,105.568,rs3750105,-0.052  
7,105.628,rs6953258,-0.051  
7,105.815,rs2030948,-0.054  
7,105.856,rs6959219,-0.055  
7,105.897,rs17305725,-0.056  
7,105.902,rs17166665,-0.056  
7,106.033,rs854547,-0.050  
7,106.059,rs17166818,-0.053  
7,106.080,rs1053275,-0.056  
7,106.119,rs10240138,-0.066  
7,106.161,rs7784619,-0.065  
7,106.179,rs7807774,-0.074  
7,106.185,rs10247649,-0.077  
7,106.207,rs1485003,-0.080  
7,106.221,rs854093,-0.088  
7,106.281,rs7798936,-0.084  
7,106.292,rs11767450,-0.084  
7,106.300,rs1585737,-0.081  
7,106.394,rs7789537,-0.056  
7,106.436,rs9640640,-0.046  
7,106.493,rs6465507,-0.032  
7,106.527,rs6961784,-0.034  
7,106.579,rs6465527,-0.039  
7,106.716,rs7786855,-0.053  
7,106.806,rs2948240,-0.075  
7,106.851,rs1403185,-0.073  
7,106.873,rs4727353,-0.088  
7,106.908,rs12531148,-0.128  
7,106.914,rs10486860,-0.133  
7,106.932,rs717483,-0.144  
7,106.939,rs2240293,-0.149  
7,106.941,rs9641200,-0.149  
7,106.968,rs1207731,-0.145  
7,106.995,rs1207721,-0.146  
7,107.020,rs1526084,-0.155  
7,107.169,rs1918523,-0.170  
7,107.277,rs1420172,-0.167  
7,107.349,rs10435325,-0.164  
7,107.370,rs1420181,-0.163  
7,107.376,rs10236201,-0.164  
7,107.449,rs1003620,-0.193  
7,107.452,rs10485998,-0.193  
7,107.460,rs10234240,-0.191  
7,107.473,rs17168699,-0.189  
7,107.518,rs10256461,-0.185  
7,107.555,rs6415328,-0.170  
7,107.674,rs7796445,-0.101  
7,107.725,rs2072100,-0.080  
7,107.779,rs460,-0.074  
7,107.836,rs2665486,-0.064  
7,107.974,rs10228951,-0.041  
7,108.043,rs847580,-0.032  
7,108.063,rs7777145,-0.030  
7,108.405,rs9649213,-0.007  
7,108.424,rs1688605,-0.005  
7,108.484,rs705321,-0.004  
7,108.524,rs817921,-0.006  
7,108.546,rs817764,-0.005  
7,108.553,rs817757,-0.006

7,108.600,rs6465691,-0.006  
7,108.743,rs6465710,-0.000  
7,108.757,rs6972315,-0.000  
7,108.772,rs9986780,-0.000  
7,108.801,rs4727416,-0.002  
7,108.859,rs1548622,-0.004  
7,109.049,rs219824,-0.016  
7,109.100,rs10231389,-0.019  
7,109.188,rs4729521,-0.026  
7,109.346,rs12705058,-0.036  
7,109.503,rs2037595,-0.047  
7,109.718,rs2687087,-0.064  
7,109.770,rs2246709,-0.069  
7,109.884,rs5015755,-0.071  
7,109.902,rs4074838,-0.070  
7,110.023,rs2734897,-0.070  
7,110.100,rs4434553,-0.082  
7,110.227,rs314300,-0.049  
7,110.240,rs191137,-0.063  
7,110.315,rs2075756,-0.060  
7,110.378,rs4637750,-0.047  
7,110.397,rs9691167,-0.046  
7,110.488,rs11772963,-0.039  
7,110.637,rs1048303,-0.032  
7,110.695,rs10953329,-0.038  
7,110.824,rs6943474,-0.062  
7,110.846,rs10268365,-0.057  
7,110.883,rs10254310,-0.051  
7,110.923,rs7796259,-0.045  
7,110.970,rs7778986,-0.044  
7,110.986,rs10279545,-0.043  
7,110.991,rs6949545,-0.043  
7,111.022,rs4729731,-0.047  
7,111.059,rs11489598,-0.054  
7,111.096,rs11771949,-0.064  
7,111.148,rs2529190,-0.092  
7,111.162,rs2529243,-0.090  
7,111.186,rs11977362,-0.070  
7,111.249,rs11767486,-0.070  
7,111.256,rs2529232,-0.069  
7,111.413,rs11765661,-0.053  
7,111.420,rs10264866,-0.053  
7,111.434,rs11769397,-0.053  
7,111.437,rs6465845,-0.053  
7,111.446,rs11971570,-0.038  
7,111.611,rs1734729,-0.012  
7,111.631,rs803073,-0.010  
7,111.710,rs6947435,-0.013  
7,111.743,rs12669274,-0.015  
7,111.755,rs3823657,-0.016  
7,111.772,rs1131383,-0.017  
7,112.066,rs12530741,-0.020  
7,112.250,rs17605251,-0.017  
7,112.402,rs11489600,-0.015  
7,112.586,rs362780,-0.009  
7,112.587,rs362721,-0.009  
7,112.598,rs362726,-0.022  
7,112.683,rs2073559,-0.010  
7,112.737,rs3819466,-0.007  
7,112.743,rs661492,-0.008  
7,112.837,rs2237643,-0.007

7,112.850,rs7811777,-0.006  
7,112.871,rs802788,-0.008  
7,112.888,rs17157475,-0.007  
7,112.944,rs6465953,-0.005  
7,112.984,rs10264307,-0.004  
7,113.047,rs194834,-0.000  
7,113.115,rs2106502,0.000  
7,113.118,rs6973111,0.000  
7,113.150,rs4383914,0.000  
7,113.229,rs2385168,-0.001  
7,113.286,rs2188172,-0.004  
7,113.312,rs42209,-0.006  
7,113.321,rs992692,-0.007  
7,113.477,rs11977439,-0.036  
7,113.484,rs4559179,-0.038  
7,113.502,rs10279375,-0.043  
7,113.504,rs4517051,-0.043  
7,113.550,rs4283980,-0.036  
7,113.631,rs2041830,-0.038  
7,114.787,rs6945887,-0.025  
7,114.882,rs2258851,-0.013  
7,115.020,rs6466070,-0.007  
7,115.176,rs17150293,-0.003  
7,115.184,rs7787604,-0.003  
7,115.237,rs10242311,-0.005  
7,115.242,rs4730097,-0.005  
7,115.308,rs7799245,-0.004  
7,115.322,rs846926,-0.004  
7,115.418,rs614260,-0.004  
7,115.482,rs587741,-0.003  
7,115.500,rs11977943,-0.003  
7,115.510,rs557657,-0.003  
7,115.527,rs514122,-0.004  
7,115.542,rs17152107,-0.005  
7,115.580,rs12533538,-0.004  
7,115.616,rs17152163,-0.002  
7,115.651,rs17152217,-0.006  
7,115.673,rs1859814,-0.009  
7,115.699,rs212438,-0.002  
7,115.705,rs11765906,-0.002  
7,115.737,rs10248057,-0.000  
7,115.749,rs12533809,0.000  
7,115.750,rs17152355,-0.000  
7,115.782,rs193805,-0.001  
7,115.790,rs2727758,-0.002  
7,115.799,rs193795,-0.002  
7,115.834,rs3887998,-0.005  
7,115.874,rs12533103,-0.003  
7,115.884,rs7798028,-0.003  
7,115.965,rs7785757,-0.003  
7,116.056,rs2192383,-0.003  
7,116.085,rs10487820,-0.002  
7,116.154,rs997980,-0.000  
7,116.175,rs2704958,0.000  
7,116.228,rs179883,0.003  
7,116.248,rs179898,0.005  
7,116.265,rs2893638,0.013  
7,116.279,rs9641363,0.014  
7,116.374,rs6975426,0.023  
7,116.382,rs17367541,0.024  
7,116.404,rs17153276,0.028



7,116.443,rs997803,0.037  
7,116.512,rs342182,0.059  
7,116.537,rs342231,0.060  
7,116.557,rs10274553,0.062  
7,116.574,rs342301,0.060  
7,116.584,rs17153394,0.063  
7,116.593,rs4517053,0.081  
7,116.594,rs6957683,0.081  
7,116.611,rs2132462,0.066  
7,116.637,rs2028009,0.064  
7,116.648,rs42154,0.072  
7,116.670,rs849376,0.081  
7,116.732,rs17153616,0.101  
7,116.779,rs6961257,0.105  
7,116.784,rs12530679,0.105  
7,116.805,rs711441,0.104  
7,116.897,rs9656135,0.102  
7,117.517,rs6979121,0.103  
7,117.588,rs6943051,0.099  
7,118.079,rs2701688,0.050  
7,118.094,rs3817613,0.037  
7,118.120,rs1989837,0.039  
7,118.141,rs982915,0.041  
7,118.288,rs6973044,0.048  
7,118.302,rs6466182,0.048  
7,118.357,rs2108225,0.048  
7,118.380,rs10241074,0.060  
7,118.383,rs11762481,0.061  
7,118.390,rs4727688,0.057  
7,118.405,rs6967523,0.069  
7,118.487,rs848403,0.113  
7,118.638,rs11978924,0.128  
7,118.745,rs10251102,0.124  
7,118.835,rs10277164,0.119  
7,118.944,rs1721447,0.110  
7,118.949,rs2396135,0.109  
7,118.964,rs7784378,0.118  
7,118.984,rs990943,0.130  
7,119.139,rs3107968,0.137  
7,119.384,rs2245022,0.139  
7,119.657,rs1525513,0.159  
7,119.699,rs13340481,0.167  
7,119.707,rs12538565,0.167  
7,119.821,rs1723580,0.170  
7,119.829,rs2396220,0.170  
7,119.832,rs1989875,0.169  
7,119.843,rs7796325,0.183  
7,119.851,rs7785319,0.194  
7,119.856,rs10272725,0.193  
7,119.910,rs407050,0.188  
7,119.914,rs2940381,0.214  
7,119.926,rs1354991,0.210  
7,119.962,rs1404915,0.199  
7,119.978,rs7807511,0.194  
7,120.020,rs1406054,0.183  
7,120.030,rs12670438,0.179  
7,120.144,rs214454,0.134  
7,120.269,rs17158652,0.087  
7,120.285,rs11978935,0.081  
7,120.325,rs4730499,0.067  
7,120.340,rs2074114,0.060

7,120.364,rs6466389,0.051  
7,120.375,rs6954980,0.065  
7,120.377,rs17159014,0.066  
7,120.397,rs6951506,0.048  
7,120.398,rs29465,0.047  
7,120.426,rs6959338,0.031  
7,120.431,rs2522220,0.028  
7,120.439,rs6974167,0.030  
7,120.447,rs6466401,0.025  
7,120.448,rs2560640,0.037  
7,120.449,rs10260793,0.050  
7,120.458,rs12705815,0.078  
7,120.557,rs2708600,0.118  
7,120.600,rs10155986,0.123  
7,120.611,rs3807213,0.124  
7,120.624,rs12531501,0.136  
7,120.831,rs6973324,0.145  
7,120.889,rs7797689,0.138  
7,120.903,rs7801538,0.141  
7,120.958,rs2256872,0.150  
7,120.964,rs2246845,0.150  
7,121.054,rs1722305,0.134  
7,121.159,rs3922816,0.130  
7,121.164,rs2949827,0.130  
7,121.264,rs2396676,0.151  
7,121.267,rs17136593,0.151  
7,121.328,rs721996,0.163  
7,121.386,rs10226417,0.177  
7,121.410,rs4342528,0.181  
7,121.492,rs1868757,0.175  
7,121.515,rs4730626,0.173  
7,121.584,rs12112572,0.169  
7,121.639,rs1852470,0.165  
7,121.774,rs10230087,0.171  
7,121.957,rs4366023,0.188  
7,121.996,rs2188307,0.192  
7,122.050,rs4727809,0.194  
7,122.051,rs7800698,0.194  
7,122.057,rs6974433,0.194  
7,122.084,rs2709501,0.194  
7,122.136,rs371004,0.196  
7,122.234,rs2188538,0.219  
7,122.312,rs9641538,0.184  
7,122.359,rs10260121,0.155  
7,122.372,rs1918524,0.148  
7,122.387,rs6955743,0.173  
7,122.423,rs6955690,0.159  
7,122.531,rs10242959,0.152  
7,122.639,rs6466573,0.138  
7,123.091,rs6466579,0.153  
7,123.206,rs2191502,0.137  
7,123.274,rs714180,0.108  
7,123.288,rs2237712,0.102  
7,123.291,rs17138948,0.100  
7,123.368,rs41758,0.061  
7,123.446,rs10953831,0.052  
7,123.450,rs7782376,0.066  
7,123.539,rs7785492,0.079  
7,123.571,rs3808222,0.080  
7,123.588,rs10224415,0.080  
7,123.595,rs10487358,0.080

7,123.662,rs213950,0.115  
7,123.675,rs13221882,0.114  
7,123.717,rs929668,0.121  
7,123.723,rs13224934,0.123  
7,123.730,rs7807677,0.125  
7,123.737,rs1966438,0.126  
7,123.777,rs38825,0.132  
7,123.784,rs6953304,0.131  
7,123.866,rs4727871,0.154  
7,123.920,rs10265433,0.176  
7,124.020,rs2402455,0.192  
7,124.039,rs12114016,0.188  
7,124.107,rs7455060,0.173  
7,124.114,rs10228248,0.172  
7,124.198,rs13234712,0.164  
7,124.235,rs7793527,0.159  
7,124.318,rs7785571,0.147  
7,124.355,rs11981389,0.152  
7,124.361,rs728115,0.152  
7,124.376,rs734317,0.151  
7,124.495,rs41690,0.141  
7,124.765,rs10262491,0.119  
7,124.914,rs798903,0.107  
7,125.015,rs6953489,0.093  
7,125.066,rs3757552,0.086  
7,125.184,rs2707507,0.080  
7,125.437,rs2697189,0.061  
7,125.475,rs7806789,0.055  
7,125.490,rs4731018,0.052  
7,125.495,rs2402574,0.051  
7,125.509,rs1983496,0.049  
7,125.526,rs7796124,0.046  
7,125.593,rs10253361,0.036  
7,125.609,rs7812162,0.038  
7,125.636,rs6959329,0.040  
7,125.672,rs10953942,0.041  
7,125.684,rs10229295,0.029  
7,125.987,rs537162,0.017  
7,126.010,rs284391,0.015  
7,126.059,rs1899689,0.012  
7,126.063,rs920802,0.012  
7,126.086,rs6944990,0.013  
7,126.105,rs4731056,0.013  
7,126.138,rs3757534,0.014  
7,126.210,rs10238396,0.018  
7,126.339,rs929569,0.030  
7,126.446,rs10260099,0.034  
7,126.500,rs6965704,0.034  
7,126.555,rs1404838,0.031  
7,126.677,rs10487971,0.025  
7,126.679,rs7807163,0.025  
7,126.691,rs10277013,0.029  
7,126.747,rs2191800,0.053  
7,126.770,rs1860722,0.048  
7,126.803,rs2286831,0.050  
7,126.820,rs4731117,0.048  
7,127.029,rs7808465,0.045  
7,127.148,rs12154449,0.041  
7,127.234,rs13233306,0.026  
7,127.248,rs12534665,0.024  
7,127.359,rs17147142,0.031

7,127.411,rs763434,0.032  
7,127.418,rs4731184,0.033  
7,127.420,rs1544521,0.033  
7,127.483,rs10954042,0.041  
7,127.596,rs1008290,0.044  
7,127.848,rs13226395,0.035  
7,127.932,rs2968865,0.019  
7,127.999,rs17148062,0.017  
7,128.119,rs12154752,0.010  
7,128.240,rs10487420,0.008  
7,128.250,rs996191,0.008  
7,128.260,rs10236790,0.008  
7,128.339,rs6974130,0.010  
7,128.443,rs9641778,0.018  
7,128.485,rs1419540,0.020  
7,128.498,rs6965646,0.030  
7,128.597,rs668717,0.049  
7,128.630,rs1673366,0.059  
7,128.708,rs1074728,0.078  
7,128.776,rs974441,0.073  
7,128.904,rs17863168,0.062  
7,128.946,rs4728060,0.059  
7,128.960,rs1419434,0.058  
7,129.006,rs2402851,0.057  
7,129.038,rs6975798,0.056  
7,129.100,rs2299546,0.056  
7,129.484,rs3808055,0.057  
7,129.521,rs322812,0.059  
7,129.587,rs1017607,0.046  
7,129.606,rs6976221,0.053  
7,129.614,rs6467165,0.054  
7,129.667,rs2060715,0.056  
7,129.691,rs7811892,0.069  
7,129.723,rs2290225,0.076  
7,129.733,rs723627,0.078  
7,129.906,rs4371935,0.116  
7,130.110,rs731770,0.138  
7,130.120,rs7780294,0.137  
7,130.125,rs339054,0.136  
7,130.240,rs1472147,0.113  
7,130.265,rs4731523,0.101  
7,130.285,rs1495461,0.092  
7,130.416,rs2167273,0.084  
7,130.437,rs7783840,0.082  
7,130.465,rs4731549,0.093  
7,130.477,rs13227498,0.094  
7,130.506,rs13243618,0.075  
7,130.557,rs2718107,0.061  
7,130.597,rs17348939,0.048  
7,130.730,rs1665105,0.041  
7,130.741,rs753336,0.034  
7,130.766,rs634484,0.027  
7,130.769,rs4731588,0.026  
7,130.835,rs2402976,0.023  
7,130.852,rs10244147,0.021  
7,130.860,rs6965643,0.021  
7,130.864,rs2693727,0.021  
7,130.867,rs4731630,0.030  
7,130.928,rs10215972,0.029  
7,130.940,rs6943541,0.031  
7,130.948,rs4731641,0.033

7,130.995,rs6943859,0.035  
7,131.206,rs4324873,0.042  
7,131.429,rs17164720,0.038  
7,131.491,rs17164729,0.037  
7,131.508,rs1994468,0.037  
7,131.602,rs6467289,0.035  
7,131.738,rs2242337,0.034  
7,131.804,rs901799,0.033  
7,132.144,rs17330508,0.031  
7,132.163,rs1990790,0.031  
7,132.539,rs765205,0.009  
7,133.147,rs6467310,0.002  
7,133.508,rs290794,0.001  
7,133.584,rs13234407,0.001  
7,133.720,rs10954285,0.000  
7,133.819,rs4269476,0.002  
7,133.900,rs207210,0.004  
7,134.013,rs9649546,0.011  
7,134.024,rs157925,0.012  
7,134.050,rs205761,0.014  
7,134.073,rs205764,0.014  
7,134.161,rs3823556,0.009  
7,134.264,rs4141794,0.001  
7,134.267,rs6973318,0.001  
7,134.322,rs10488383,0.000  
7,134.330,rs10237038,0.000  
7,134.346,rs1588769,0.000  
7,134.412,rs10265693,0.001  
7,134.471,rs7803075,0.003  
7,134.539,rs6467345,0.002  
7,134.587,rs7812207,0.002  
7,134.596,rs7791880,0.002  
7,134.622,rs10253511,0.001  
7,134.686,rs9690297,-0.000  
7,134.741,rs4731759,-0.002  
7,134.881,rs1863011,-0.014  
7,134.917,rs10240502,-0.016  
7,134.922,rs2129557,-0.016  
7,134.946,rs9640862,-0.025  
7,134.997,rs4731772,-0.026  
7,135.011,rs4731774,-0.026  
7,135.155,rs4728218,-0.046  
7,135.681,rs1043893,-0.063  
7,135.713,rs3212300,-0.061  
7,135.801,rs6953894,-0.057  
7,135.822,rs1465387,-0.057  
7,135.847,rs12667410,-0.056  
7,135.919,rs11760907,-0.064  
7,135.961,rs10155893,-0.058  
7,136.055,rs929731,-0.029  
7,136.181,rs11765576,-0.023  
7,136.188,rs10215358,-0.023  
7,136.212,rs4076265,-0.024  
7,136.330,rs2971759,-0.043  
7,136.370,rs17165866,-0.051  
7,136.439,rs2333894,-0.053  
7,136.560,rs4728236,-0.065  
7,136.659,rs2333896,-0.065  
7,136.815,rs1991190,-0.082  
7,136.881,rs1593306,-0.090  
7,136.938,rs10488345,-0.079

7,137.005,rs4311612,-0.068  
7,137.157,rs6944714,-0.088  
7,137.389,rs281913,-0.077  
7,137.541,rs11763166,-0.074  
7,137.776,rs11762143,-0.083  
7,137.910,rs1424596,-0.077  
7,137.968,rs2042513,-0.075  
7,138.142,rs741664,-0.078  
7,138.235,rs1347229,-0.069  
7,138.424,rs156927,-0.055  
7,138.503,rs156974,-0.038  
7,138.574,rs7789101,-0.035  
7,138.604,rs4728260,-0.035  
7,138.809,rs3823572,-0.028  
7,138.839,rs1222430,-0.031  
7,138.845,rs1421480,-0.031  
7,138.853,rs1364423,-0.030  
7,138.855,rs12667801,-0.030  
7,138.863,rs4732021,-0.027  
7,138.905,rs782535,-0.012  
7,138.924,rs1722883,-0.007  
7,138.929,rs4728329,-0.006  
7,138.932,rs9641977,-0.006  
7,138.963,rs7788959,-0.005  
7,138.967,rs4142278,-0.005  
7,138.968,rs964546,-0.005  
7,138.978,rs6962033,-0.004  
7,139.019,rs2347717,-0.001  
7,139.034,rs17133294,-0.001  
7,139.223,rs6973420,0.000  
7,139.296,rs6976629,0.000  
7,139.799,rs11771999,0.001  
7,139.864,rs3800594,0.003  
7,139.936,rs292593,0.003  
7,140.006,rs292639,0.008  
7,140.039,rs17168358,0.005  
7,140.060,rs292706,0.006  
7,140.122,rs889933,0.014  
7,140.343,rs16874692,0.026  
7,140.375,rs6467593,0.029  
7,140.615,rs4430037,0.043  
7,140.619,rs10228973,0.042  
7,140.662,rs10279370,0.037  
7,140.663,rs7357254,0.036  
7,140.667,rs6977424,0.036  
7,140.678,rs4732145,0.027  
7,140.716,rs17168469,0.039  
7,140.723,rs6962270,0.041  
7,140.803,rs1982292,0.031  
7,140.811,rs7789182,0.030  
7,140.935,rs1994464,0.024  
7,140.957,rs7793221,0.028  
7,140.997,rs2129800,0.025  
7,141.004,rs322213,0.024  
7,141.051,rs4728378,0.020  
7,141.065,rs9801253,0.018  
7,141.087,rs6959619,0.015  
7,141.103,rs2129801,0.013  
7,141.121,rs10262220,0.012  
7,141.216,rs1346209,0.010  
7,141.285,rs13238853,0.014

7,141.287,rs7811360,0.014  
7,141.317,rs2217092,0.013  
7,141.404,rs2882248,0.015  
7,141.430,rs7796512,0.014  
7,141.520,rs918985,0.011  
7,141.628,rs1946332,0.007  
7,141.827,rs10259281,0.001  
7,141.907,rs10954546,0.000  
7,142.011,rs9656474,0.000  
7,142.027,rs6467694,0.000  
7,142.041,rs3735028,0.000  
7,142.055,rs1424569,0.000  
7,142.125,rs7800170,0.000  
7,142.255,rs324666,0.001  
7,142.292,rs11772948,0.000  
7,142.451,rs6467700,0.000  
7,142.524,rs10435425,0.000  
7,142.548,rs322246,0.000  
7,142.570,rs6970530,0.002  
7,142.662,rs13245911,0.002  
7,142.867,rs320686,-0.000  
7,143.075,rs2278102,0.000  
7,143.202,rs1731913,0.000  
7,143.229,rs1918839,0.000  
7,143.385,rs6971080,0.000  
7,143.834,rs706567,-0.001  
7,143.897,rs706578,-0.002  
7,144.385,rs3800644,-0.005  
7,144.615,rs3778818,-0.009  
7,144.723,rs889869,-0.011  
7,144.949,rs6976928,-0.005  
7,145.284,rs274007,-0.001  
7,145.339,rs17276467,-0.000  
7,145.362,rs12707374,-0.000  
7,145.381,rs6467728,-0.000  
7,145.581,rs12112517,0.000  
7,145.774,rs17169524,0.000  
7,145.783,rs2440799,0.000  
7,145.853,rs2451233,0.000  
7,145.885,rs6969282,0.000  
7,145.889,rs6961222,0.000  
7,145.907,rs2465075,-0.000  
7,145.908,rs2465076,-0.000  
7,145.980,rs6953434,-0.000  
7,146.033,rs6955437,-0.000  
7,146.145,rs4099093,-0.000  
7,146.251,rs17361616,-0.000  
7,146.330,rs11769851,0.000  
7,146.461,rs7791577,0.001  
7,146.859,rs1673214,0.001  
7,146.870,rs1673218,0.001  
7,146.881,rs1673224,0.001  
7,146.892,rs753223,0.000  
7,146.909,rs4728438,0.000  
7,146.911,rs1659809,0.000  
7,146.972,rs11770967,-0.003  
7,147.009,rs17160459,-0.002  
7,147.039,rs6944016,-0.002  
7,147.072,rs6977910,-0.001  
7,147.078,rs999229,-0.005  
7,147.099,rs3800569,-0.004

7,147.137,rs1562853,-0.007  
7,147.153,rs411467,-0.011  
7,147.174,rs3734936,-0.011  
7,147.195,rs10258719,-0.010  
7,147.236,rs6467802,-0.013  
7,147.292,rs10435433,-0.012  
7,147.401,rs10227043,-0.009  
7,147.493,rs6467815,-0.011  
7,147.508,rs6944822,-0.011  
7,147.665,rs512927,-0.014  
7,147.776,rs7803490,-0.022  
7,147.799,rs7779972,-0.022  
7,147.833,rs12535022,-0.023  
7,148.369,rs7779375,-0.059  
7,148.399,rs7385378,-0.058  
7,148.415,rs10435440,-0.046  
7,148.460,rs12672312,-0.054  
7,148.461,rs7799361,-0.054  
7,148.548,rs2030712,-0.058  
7,148.634,rs9719152,-0.050  
7,148.772,rs10261757,-0.053  
7,148.839,rs41708,-0.051  
7,148.881,rs4726434,-0.051  
7,148.926,rs2107901,-0.052  
7,148.960,rs11971428,-0.076  
7,148.974,rs3801148,-0.103  
7,149.013,rs12703513,-0.146  
7,149.018,rs10267006,-0.150  
7,149.175,rs2363101,-0.143  
7,149.196,rs2471281,-0.141  
7,149.208,rs7799803,-0.160  
7,149.217,rs11971015,-0.174  
7,149.231,rs2471282,-0.179  
7,149.256,rs12538711,-0.181  
7,149.342,rs9640465,-0.211  
7,149.344,rs12539339,-0.211  
7,149.347,rs6954902,-0.212  
7,149.369,rs2948386,-0.208  
7,149.397,rs2272096,-0.205  
7,149.409,rs7776957,-0.203  
7,149.447,rs6945832,-0.188  
7,149.454,rs6852,-0.188  
7,149.463,rs6464833,-0.187  
7,149.595,rs269267,-0.147  
7,149.797,rs17623382,-0.115  
7,149.887,rs9886312,-0.117  
7,150.092,rs7789917,-0.088  
7,150.107,rs13236601,-0.091  
7,150.130,rs10256379,-0.097  
7,150.175,rs6967493,-0.096  
7,150.199,rs6975836,-0.092  
7,150.207,rs917158,-0.091  
7,150.295,rs10266594,-0.095  
7,150.344,rs1181728,-0.086  
7,150.369,rs1181739,-0.083  
7,150.396,rs1181763,-0.088  
7,150.452,rs4726454,-0.092  
7,150.514,rs1110074,-0.097  
7,150.817,rs12703402,-0.093  
7,151.021,rs2234002,-0.099  
7,151.361,rs4726484,-0.085



7,151.365,rs1285938,-0.093  
7,151.373,rs10255702,-0.076  
7,151.377,rs4132774,-0.054  
7,151.385,rs7810984,-0.053  
7,151.409,rs6944985,-0.049  
7,151.413,rs6954522,-0.043  
7,151.428,rs4236467,-0.045  
7,151.444,rs5012030,-0.033  
7,151.470,rs17162994,-0.045  
7,151.501,rs6958838,-0.058  
7,151.539,rs11768398,-0.056  
7,151.550,rs2855882,-0.058  
7,151.551,rs949425,-0.058  
7,151.621,rs2367486,-0.081  
7,151.638,rs2063993,-0.082  
7,151.733,rs12703516,-0.063  
7,151.747,rs4726600,-0.076  
7,151.764,rs10256011,-0.074  
7,151.793,rs940867,-0.072  
7,151.794,rs2242493,-0.087  
7,151.801,rs7802536,-0.085  
7,151.806,rs10233736,-0.079  
7,151.815,rs10952549,-0.087  
7,151.818,rs4726618,-0.092  
7,151.821,rs11771145,-0.092  
7,151.845,rs2949739,-0.093  
7,151.848,rs2966709,-0.093  
7,151.855,rs2949769,-0.092  
7,151.972,rs12540107,-0.067  
7,152.076,rs6947163,-0.058  
7,152.102,rs1023533,-0.054  
7,152.160,rs2107759,-0.048  
7,152.266,rs2951346,-0.041  
7,152.606,rs1024481,-0.084  
7,152.669,rs4726711,-0.086  
7,152.699,rs41238,-0.109  
7,152.725,rs2191034,-0.111  
7,152.744,rs2057868,-0.112  
7,152.807,rs7804157,-0.095  
7,152.840,rs17286117,-0.103  
7,152.843,rs10231525,-0.104  
7,152.857,rs17170295,-0.113  
7,152.894,rs7807524,-0.125  
7,152.902,rs17170428,-0.124  
7,152.942,rs13438381,-0.123  
7,153.030,rs1731117,-0.120  
7,153.154,rs1881847,-0.124  
7,153.252,rs4397312,-0.135  
7,153.282,rs10258763,-0.138  
7,153.287,rs1525459,-0.138  
7,153.311,rs17394323,-0.149  
7,153.332,rs7781772,-0.163  
7,153.426,rs9640440,-0.183  
7,153.520,rs7804383,-0.193  
7,153.533,rs12531488,-0.187  
7,153.562,rs10281160,-0.171  
7,153.613,rs957452,-0.172  
7,153.651,rs2023995,-0.182  
7,153.662,rs7779216,-0.180  
7,153.757,rs850377,-0.192  
7,153.762,rs850360,-0.218

7,153.799,rs6952800,-0.210  
7,153.935,rs850533,-0.223  
7,154.042,rs4601231,-0.239  
7,154.101,rs4591940,-0.237  
7,154.131,rs6965855,-0.238  
7,154.140,rs6979491,-0.236  
7,154.152,rs1404803,-0.232  
7,154.236,rs13230938,-0.257  
7,154.237,rs4612252,-0.257  
7,154.298,rs1405109,-0.252  
7,154.342,rs17503262,-0.231  
7,154.468,rs700281,-0.263  
7,154.858,rs766094,-0.308  
7,154.935,rs10952650,-0.314  
7,155.102,rs344465,-0.314  
7,155.196,rs986062,-0.313  
7,155.463,rs7780475,-0.337  
7,155.534,rs10230479,-0.344  
7,155.548,rs7341537,-0.346  
7,155.553,rs12703846,-0.348  
7,156.001,rs2159472,-0.363  
7,156.024,rs10266239,-0.355  
7,156.103,rs10261458,-0.324  
7,156.199,rs4726818,-0.263  
7,156.588,rs9769600,-0.253  
7,156.645,rs12703890,-0.248  
7,156.661,rs12531764,-0.246  
7,157.276,rs7781317,-0.227  
7,157.285,rs10487689,-0.249  
7,157.287,rs1541415,-0.248  
7,157.290,rs10226360,-0.249  
7,157.345,rs851814,-0.273  
7,157.582,rs11975946,-0.251  
7,157.656,rs7783626,-0.239  
7,157.849,rs700317,-0.226  
7,157.893,rs10253551,-0.218  
7,157.900,rs12056208,-0.216  
7,158.075,rs851697,-0.207  
7,158.195,rs12539579,-0.181  
7,158.346,rs2538976,-0.165  
7,158.440,rs2708264,-0.160  
7,158.441,rs2539000,-0.160  
7,158.526,rs1997530,-0.144  
7,158.557,rs10229688,-0.146  
7,158.629,rs2710079,-0.147  
7,158.815,rs10271435,-0.173  
7,158.958,rs6464854,-0.154  
7,159.098,rs10264662,-0.114  
7,159.139,rs2972112,-0.114  
7,159.145,rs2972123,-0.113  
7,159.176,rs17170876,-0.109  
7,159.221,rs10245185,-0.103  
7,159.245,rs4520084,-0.083  
7,159.292,rs10263021,-0.080  
7,159.381,rs1881722,-0.074  
7,159.502,rs1110038,-0.052  
7,159.824,rs2530311,-0.053  
7,159.888,rs17616515,-0.044  
7,159.956,rs6970519,-0.045  
7,160.025,rs6464907,-0.043  
7,160.184,rs10280054,-0.030

7,160.253,rs6978741,-0.039  
7,160.325,rs6947121,-0.033  
7,160.449,rs11773375,-0.021  
7,160.506,rs7812293,-0.002  
7,160.754,rs243482,-0.005  
7,160.839,rs10271133,-0.006  
7,160.850,rs7778273,-0.005  
7,161.081,rs7790642,-0.001  
7,161.091,rs12531078,-0.001  
7,161.113,rs922411,-0.002  
7,161.130,rs716817,-0.003  
7,161.156,rs6946486,-0.002  
7,161.188,rs10265213,-0.002  
7,161.278,rs3735315,-0.002  
7,161.298,rs11761128,-0.007  
7,161.303,rs736548,-0.007  
7,161.326,rs1404862,-0.006  
7,161.338,rs1636409,-0.004  
7,161.350,rs6965442,-0.003  
7,161.364,rs6973105,-0.002  
7,161.371,rs3735317,-0.002  
7,161.391,rs709067,-0.004  
7,161.393,rs6949128,-0.001  
7,161.478,rs11982494,-0.002  
7,161.520,rs929344,-0.008  
7,161.522,rs855653,-0.017  
7,161.523,rs855654,-0.021  
7,161.525,rs855656,-0.026  
7,161.573,rs2074699,-0.028  
7,161.591,rs10807976,-0.027  
7,161.829,rs10244748,-0.015  
7,161.857,rs7393,-0.010  
7,161.867,rs4725896,-0.010  
7,161.878,rs7777181,-0.011  
7,161.883,rs13222973,-0.012  
7,161.895,rs6969414,-0.009  
7,161.911,rs7796182,-0.012  
7,161.916,rs4342497,-0.012  
7,162.266,rs6464094,-0.003  
7,162.421,rs17256042,-0.001  
7,162.423,rs3173833,-0.001  
7,162.464,rs2888674,-0.002  
7,162.501,rs17173637,-0.002  
7,162.677,rs10216051,-0.003  
7,163.073,rs2373961,-0.010  
7,163.169,rs3918227,-0.010  
7,163.200,rs743507,-0.011  
7,163.236,rs2373929,-0.012  
7,163.305,rs6947821,-0.013  
7,163.323,rs17545756,-0.013  
7,163.487,rs2303933,-0.012  
7,163.636,rs1978655,-0.019  
7,163.653,rs4725991,-0.019  
7,164.047,rs2487150,-0.016  
7,164.076,rs2288649,-0.015  
7,164.090,rs6952465,-0.015  
7,164.095,rs310589,-0.015  
7,164.100,rs310586,-0.014  
7,164.327,rs122815,-0.011  
7,164.381,rs3789823,-0.010  
7,164.404,rs219236,-0.009

7,164.574,rs219249,-0.006  
7,164.734,rs17705456,-0.003  
7,164.766,rs7807594,-0.002  
7,164.809,rs2063995,-0.002  
7,165.033,rs1558164,-0.000  
7,165.095,rs1004340,0.000  
7,165.210,rs7792547,0.003  
7,165.250,rs10252902,0.004  
7,165.351,rs9640291,0.007  
7,165.507,rs17635967,0.007  
7,165.511,rs13224450,0.007  
7,165.612,rs7811407,0.009  
7,165.730,rs2538039,0.012  
7,165.900,rs2727541,0.008  
7,165.939,rs6952398,0.007  
7,165.947,rs10235949,0.007  
7,165.993,rs2536067,0.006  
7,166.029,rs7788160,0.005  
7,166.032,rs6960717,0.005  
7,166.038,rs6970522,0.005  
7,166.079,rs6965834,0.001  
7,166.084,rs7809503,0.006  
7,166.085,rs4418266,0.001  
7,166.087,rs9632641,0.008  
7,166.102,rs4425665,0.022  
7,166.115,rs7789699,0.042  
7,166.126,rs4726096,0.060  
7,166.140,rs10257529,0.062  
7,166.151,rs4595037,0.075  
7,166.152,rs10952318,0.077  
7,166.189,rs13238117,0.058  
7,166.194,rs1881623,0.057  
7,166.219,rs7795096,0.050  
7,166.240,rs7789674,0.045  
7,166.283,rs1881643,0.061  
7,166.284,rs10500202,0.061  
7,166.304,rs10952325,0.059  
7,166.333,rs13238381,0.065  
7,166.365,rs4726114,0.065  
7,166.397,rs2374313,0.056  
7,166.404,rs10259821,0.053  
7,166.430,rs1534664,0.040  
7,166.445,rs7799325,0.040  
7,166.467,rs6960270,0.040  
7,166.471,rs1919522,0.040  
7,166.494,rs10235029,0.039  
7,166.510,rs4726130,0.015  
7,166.796,rs10487892,0.012  
7,168.227,rs1107394,-0.000  
7,168.460,rs6952647,-0.001  
7,168.643,rs10155833,-0.012  
7,168.883,rs6464250,-0.033  
7,169.157,rs757052,-0.057  
7,169.462,rs6970449,-0.091  
7,169.633,rs10253827,-0.122  
7,169.643,rs12539937,-0.123  
7,169.910,rs7809363,-0.140  
7,170.181,rs7792217,-0.183  
7,170.237,rs6977071,-0.169  
7,170.302,rs6950216,-0.157  
7,170.363,rs940270,-0.115

7,170.407,rs2311367,-0.108  
7,170.429,rs12532611,-0.106  
7,170.461,rs10282370,-0.120  
7,170.533,rs6464295,-0.126  
7,170.545,rs12531982,-0.125  
7,170.553,rs520556,-0.124  
7,170.564,rs7800857,-0.122  
7,170.594,rs567778,-0.119  
7,170.613,rs6464297,-0.117  
7,170.664,rs4725479,-0.123  
7,170.711,rs17758559,-0.132  
7,170.727,rs1404591,-0.136  
7,171.011,rs4285401,-0.210  
7,171.100,rs6949036,-0.219  
7,171.180,rs1882828,-0.228  
7,171.212,rs6464323,-0.228  
7,171.308,rs1735086,-0.223  
7,171.325,rs1735093,-0.221  
7,171.346,rs401246,-0.222  
7,171.384,rs6946476,-0.224  
7,171.389,rs422283,-0.224  
7,171.424,rs2053640,-0.224  
7,171.463,rs4726278,-0.231  
7,171.491,rs960840,-0.235  
7,171.717,rs12703305,-0.253  
7,171.894,rs3111276,-0.265  
7,172.066,rs10247334,-0.305  
7,172.091,rs4726308,-0.306  
7,172.197,rs4595033,-0.302  
7,172.216,rs4726318,-0.287  
7,172.249,rs4410821,-0.256  
7,172.295,rs10228200,-0.249  
7,172.698,rs2538420,-0.314  
7,172.711,rs2622244,-0.317  
7,172.724,rs7783202,-0.281  
7,172.786,rs13246647,-0.267  
7,172.960,rs2190997,-0.318  
7,173.002,rs6973850,-0.327  
7,173.043,rs7803838,-0.330  
7,173.183,rs17134265,-0.319  
7,173.615,rs12532924,-0.304  
7,173.697,rs4380850,-0.312  
7,173.864,rs10274025,-0.330  
7,173.872,rs4078461,-0.366  
7,173.881,rs10952471,-0.372  
7,173.930,rs4278085,-0.407  
7,173.974,rs6464401,-0.376  
7,174.019,rs6959816,-0.387  
7,174.784,rs17174375,-0.464  
7,175.110,rs7776495,-0.480  
7,175.621,rs4726417,-0.454  
7,175.712,rs7791484,-0.406  
7,175.716,rs13246835,-0.406  
7,175.745,rs4726422,-0.405  
7,175.771,rs13230019,-0.441  
7,175.821,rs10263063,-0.422  
7,175.855,rs744684,-0.479  
7,175.858,rs11771157,-0.483  
7,175.860,rs12668503,-0.461  
7,175.861,rs2087720,-0.448  
7,175.956,rs1552734,-0.406

7,176.052,rs6962496,-0.348  
7,176.508,rs7795467,-0.290  
7,176.539,rs6964189,-0.290  
7,176.605,rs6597439,-0.322  
7,176.639,rs6597446,-0.377  
7,176.641,rs2046748,-0.335  
7,176.642,rs6980443,-0.335  
7,176.829,rs3807222,-0.345  
7,176.865,rs7792530,-0.344  
7,176.867,rs7807148,-0.343  
7,176.978,rs10273747,-0.324  
7,176.985,rs12666280,-0.294  
7,176.992,rs3823523,-0.321  
7,177.136,rs961232,-0.201  
7,177.140,rs12532804,-0.215  
7,177.145,rs6597423,-0.186  
7,177.231,rs11243316,-0.159  
7,177.399,rs4265142,-0.091  
7,177.445,rs11243322,-0.083  
7,177.571,rs3807294,-0.080  
7,177.650,rs4294147,-0.100  
7,177.678,rs882466,-0.108  
7,177.860,rs2272174,-0.128  
7,178.243,rs2919435,-0.144  
7,178.323,rs1657273,-0.143  
7,178.411,rs1657246,-0.117  
7,178.448,rs6597458,-0.089  
7,178.485,rs1881690,-0.086  
7,178.584,rs1657263,-0.080  
7,178.624,rs1657298,-0.078  
7,178.657,rs1657302,-0.075  
7,178.751,rs4960580,-0.081  
7,178.833,rs4434576,-0.100  
7,178.886,rs4960710,-0.084  
7,178.964,rs4506162,-0.077  
7,178.968,rs3923644,-0.077  
7,179.064,rs9690040,-0.069  
7,179.115,rs9769506,-0.070  
7,179.388,rs4716442,-0.106  
7,179.413,rs2058950,-0.116  
7,179.420,rs11760227,-0.117  
7,179.510,rs4621673,-0.123  
7,179.521,rs10264222,-0.125  
7,179.554,rs12531084,-0.133  
7,179.579,rs11768588,-0.138  
7,179.587,rs6948976,-0.138  
7,179.709,rs10251163,-0.137  
7,179.753,rs12538214,-0.144  
7,179.784,rs1861960,-0.136  
7,179.820,rs4716653,-0.112  
7,179.970,rs6975765,-0.074  
7,180.049,rs10277542,-0.069  
7,180.107,rs6459794,-0.060  
7,180.117,rs6953751,-0.056  
7,180.183,rs9654697,-0.028  
7,180.257,rs6946081,-0.026  
7,180.811,rs2007922,-0.044  
7,180.992,rs1233563,-0.060  
7,181.115,rs10234949,-0.065  
7,181.120,rs1731847,-0.065  
7,181.128,rs11768525,-0.067

7,181.176,rs898695,-0.080  
7,181.177,rs754469,-0.080  
7,181.196,rs7777688,-0.065  
7,181.199,rs1461208,-0.062  
7,181.201,rs7786445,-0.061  
7,181.214,rs12698335,-0.061  
7,181.257,rs1824552,-0.081  
7,181.285,rs4716923,-0.101  
7,181.416,rs10225087,-0.132  
7,181.480,rs7807731,-0.129  
7,181.526,rs1458806,-0.122  
7,181.595,rs7792543,-0.119  
7,181.674,rs2305944,-0.103  
7,181.716,rs4716580,-0.092  
7,181.735,rs6963951,-0.089  
7,181.769,rs1551634,-0.087  
7,181.844,rs7782106,-0.068  
7,181.881,rs10251705,-0.072  
7,182.112,rs6969259,-0.098  
7,182.170,rs7793353,-0.112  
7,182.259,rs7798069,-0.119  
7,182.267,rs1181908,-0.118  
7,182.436,rs1493290,-0.098  
7,182.510,rs1882458,-0.096  
7,182.587,rs9654739,-0.077  
7,182.647,rs6460015,-0.076  
7,182.731,rs4435995,-0.077  
7,182.876,rs4717043,-0.073  
7,182.932,rs10258969,-0.072  
7,182.976,rs3912927,-0.073  
7,183.225,rs1534002,-0.074  
7,183.330,rs6957217,-0.077  
7,183.354,rs6459682,-0.071  
7,183.387,rs12669392,-0.064  
7,183.603,rs1534339,-0.068  
7,183.636,rs849084,-0.085  
7,183.692,rs4716636,-0.086  
7,183.720,rs849063,-0.084  
7,183.827,rs7801996,-0.098  
7,183.853,rs849072,-0.103  
7,184.016,rs7812229,-0.108  
7,184.231,rs2072468,-0.114  
7,184.445,rs7788421,-0.112  
7,185.071,rs887614,-0.117  
7,185.118,rs777527,-0.118  
7,185.306,rs4716447,-0.117  
7,185.352,rs10259516,-0.118  
7,185.491,rs7799010,-0.118  
7,186.268,rs12533310,-0.112  
7,186.669,rs10440911,-0.078  
7,186.800,rs7804019,-0.072  
7,186.875,rs4716739,-0.080  
7,186.968,rs9768449,-0.088  
7,187.081,rs4716752,-0.087  
7,187.161,rs221250,-0.084  
7,187.368,rs10274279,-0.099  
7,187.615,rs1263566,-0.114  
7,187.636,rs1079060,-0.097  
7,187.665,rs1263549,-0.098  
7,187.886,rs867923,-0.106  
7,187.888,rs11976357,-0.106

7,187.890,rs1242775,-0.106  
7,187.913,rs1638742,-0.113  
7,187.993,rs1242778,-0.130  
7,188.154,rs870020,-0.129  
7,188.260,rs7777198,-0.125  
7,188.285,rs1529835,-0.124  
7,188.346,rs7788108,-0.130  
7,188.453,rs4716801,-0.160  
7,188.548,rs4716807,-0.181  
7,188.628,rs10249811,-0.185  
7,188.742,rs4716858,-0.191  
7,188.793,rs920027,-0.165  
7,188.917,rs4716881,-0.185  
7,189.016,rs10256092,-0.193  
7,189.097,rs6961856,-0.186  
7,189.178,rs3752374,-0.176  
7,189.341,rs6459842,-0.167  
7,189.650,rs6970487,-0.159  
7,189.769,rs6976603,-0.141  
7,189.795,rs1104921,-0.137  
7,189.851,rs11973244,-0.145  
7,189.947,rs7790889,-0.160  
7,189.952,rs4909062,-0.161  
7,190.103,rs12698219,-0.175  
7,190.171,rs7809114,-0.183  
7,190.177,rs10245268,-0.183  
7,190.409,rs10247026,-0.188  
7,190.555,rs1670340,-0.164  
7,191.342,rs13242357,-0.092  
7,192.477,rs2040897,-0.064  
7,192.627,rs2730265,-0.060  
7,193.616,rs1124425,-0.055  
8,0.005,rs4735895,0.046  
8,0.043,rs876356,0.047  
8,0.166,rs10094564,0.048  
8,0.180,rs11784674,0.049  
8,0.242,rs13274614,0.043  
8,0.319,rs11137104,0.035  
8,0.467,rs3860880,0.032  
8,0.605,rs4735959,0.040  
8,0.841,rs12678439,0.062  
8,0.929,rs4735980,0.069  
8,0.975,rs17668341,0.071  
8,1.041,rs7842241,0.073  
8,1.102,rs12716579,0.083  
8,1.219,rs7826946,0.102  
8,1.222,rs17065805,0.105  
8,1.235,rs10094928,0.124  
8,1.252,rs1463249,0.130  
8,1.283,rs4549802,0.141  
8,1.314,rs4976875,0.151  
8,1.411,rs7814902,0.188  
8,1.478,rs11775819,0.215  
8,1.479,rs10094861,0.215  
8,1.488,rs6558446,0.216  
8,1.536,rs10093402,0.219  
8,1.554,rs7823212,0.215  
8,1.569,rs12541553,0.215  
8,1.595,rs10283337,0.232  
8,1.638,rs757888,0.270  
8,1.699,rs6997056,0.279



8,2.035,rs2906590,0.270  
8,2.271,rs2235114,0.283  
8,2.283,rs4875888,0.280  
8,2.326,rs7005715,0.194  
8,2.329,rs2977177,0.190  
8,2.392,rs2977187,0.164  
8,2.420,rs7461883,0.159  
8,2.561,rs6558545,0.168  
8,2.581,rs6980781,0.164  
8,2.625,rs4875952,0.155  
8,2.675,rs7007884,0.148  
8,2.684,rs13277792,0.142  
8,2.696,rs10503168,0.130  
8,2.709,rs4875946,0.117  
8,2.766,rs7015000,0.105  
8,2.766,rs3758014,0.088  
8,2.773,rs13280012,0.077  
8,2.784,rs2294035,0.083  
8,2.803,rs7004405,0.074  
8,2.818,rs7386814,0.067  
8,2.836,rs4242548,0.066  
8,2.904,rs17757154,0.060  
8,2.919,rs6558568,0.057  
8,2.924,rs4242546,0.057  
8,2.996,rs1043223,0.041  
8,3.010,rs768753,0.037  
8,3.033,rs6558578,0.045  
8,3.124,rs7819286,0.051  
8,3.131,rs13258621,0.050  
8,3.188,rs2235121,0.058  
8,3.211,rs2294069,0.075  
8,3.211,rs2294071,0.075  
8,3.249,rs6990007,0.084  
8,3.341,rs9314455,0.090  
8,3.470,rs10110313,0.112  
8,3.773,rs4876153,0.168  
8,3.786,rs7812885,0.170  
8,3.794,rs7843995,0.171  
8,3.889,rs12549051,0.176  
8,3.908,rs2100623,0.176  
8,3.977,rs6420206,0.166  
8,3.999,rs9314461,0.138  
8,4.004,rs7828186,0.119  
8,4.160,rs7843177,0.145  
8,4.231,rs4876024,0.171  
8,4.250,rs4075492,0.180  
8,4.314,rs13439672,0.186  
8,4.315,rs17515,0.185  
8,4.322,rs10087989,0.183  
8,4.374,rs10106748,0.169  
8,4.387,rs6982596,0.162  
8,4.405,rs4457357,0.154  
8,4.424,rs7836236,0.142  
8,4.749,rs341704,0.099  
8,4.810,rs6981972,0.118  
8,4.828,rs2627283,0.107  
8,4.846,rs12682123,0.078  
8,4.862,rs897275,0.065  
8,5.134,rs10092374,0.035  
8,5.143,rs7013027,0.033  
8,5.181,rs1108095,0.021

8,5.212,rs7826548,0.014  
8,5.237,rs3802292,0.010  
8,5.253,rs7002853,0.011  
8,5.318,rs2406358,0.013  
8,5.359,rs1460404,0.014  
8,5.378,rs11136586,0.012  
8,5.389,rs259856,0.013  
8,5.424,rs13261550,0.021  
8,5.448,rs1442398,0.024  
8,5.503,rs7845677,0.058  
8,5.509,rs4546683,0.058  
8,5.517,rs7002936,0.057  
8,5.537,rs10104274,0.057  
8,5.623,rs9650506,0.059  
8,5.675,rs1503277,0.047  
8,5.747,rs1444613,0.027  
8,5.821,rs7015057,0.025  
8,5.883,rs9969557,0.024  
8,5.971,rs11778675,0.038  
8,6.102,rs10087333,0.044  
8,6.115,rs895701,0.043  
8,6.116,rs1532583,0.043  
8,6.119,rs6993945,0.043  
8,6.157,rs6983016,0.041  
8,6.176,rs7840695,0.043  
8,6.231,rs4503118,0.063  
8,6.239,rs13266649,0.065  
8,6.266,rs10086848,0.060  
8,6.397,rs2469358,0.052  
8,6.419,rs2469350,0.049  
8,6.490,rs2469312,0.036  
8,6.499,rs2449215,0.035  
8,6.522,rs4523281,0.030  
8,6.540,rs1482207,0.026  
8,6.542,rs17066733,0.029  
8,6.555,rs1586030,0.044  
8,6.559,rs13439830,0.045  
8,6.585,rs1482195,0.042  
8,6.640,rs4307367,0.024  
8,6.654,rs2720887,0.019  
8,6.718,rs7824328,0.011  
8,6.743,rs9314506,0.009  
8,6.791,rs2930362,0.009  
8,6.994,rs10216531,0.021  
8,7.008,rs2948653,0.021  
8,7.040,rs2954610,0.021  
8,7.045,rs2204223,0.022  
8,7.085,rs17068071,0.018  
8,7.108,rs1464618,0.017  
8,7.125,rs2740868,0.015  
8,7.129,rs756095,0.014  
8,7.215,rs17068332,0.011  
8,7.292,rs2059581,0.012  
8,7.325,rs2740962,0.008  
8,7.367,rs2980796,0.010  
8,7.384,rs7812972,0.012  
8,7.415,rs2554566,0.007  
8,7.459,rs2554555,0.006  
8,7.507,rs2980785,0.005  
8,7.614,rs4875274,0.008  
8,7.664,rs7828949,0.004

8,7.919,rs3849836,0.003  
8,7.989,rs4875308,0.001  
8,8.014,rs6991758,0.000  
8,8.022,rs3889326,-0.000  
8,8.042,rs3849843,-0.002  
8,8.079,rs2680590,-0.006  
8,8.086,rs11992223,-0.007  
8,8.154,rs6984808,-0.009  
8,8.157,rs13259289,-0.004  
8,8.209,rs17069790,-0.003  
8,8.242,rs2407940,-0.003  
8,8.313,rs17413343,-0.002  
8,8.347,rs10106165,-0.001  
8,8.377,rs4875329,-0.001  
8,8.437,rs6996351,0.000  
8,8.481,rs17069985,0.001  
8,8.554,rs1583651,0.000  
8,8.638,rs11988906,-0.000  
8,8.687,rs7831167,0.000  
8,8.688,rs6558876,0.000  
8,8.722,rs7816189,0.007  
8,8.723,rs11136742,0.007  
8,8.762,rs4478597,0.009  
8,8.837,rs13278525,0.011  
8,8.863,rs1217675,0.009  
8,8.900,rs4875349,0.007  
8,8.926,rs4875350,0.008  
8,9.040,rs4609213,0.005  
8,9.046,rs1112779,0.005  
8,9.087,rs11136747,0.005  
8,9.140,rs7010832,0.005  
8,9.223,rs2725009,0.002  
8,9.264,rs17416403,0.003  
8,9.312,rs2617086,0.003  
8,9.330,rs2724952,0.003  
8,9.343,rs1382249,0.003  
8,9.356,rs6990838,0.004  
8,9.406,rs2616972,0.005  
8,9.417,rs10100024,0.002  
8,9.417,rs2616982,0.002  
8,9.419,rs2725020,0.001  
8,9.419,rs10113503,0.001  
8,9.421,rs17070864,0.000  
8,9.501,rs6997228,0.003  
8,9.555,rs2617019,0.008  
8,9.711,rs17346747,0.007  
8,9.718,rs293872,0.007  
8,9.758,rs7826378,0.004  
8,9.801,rs2407592,0.004  
8,9.870,rs7835351,0.005  
8,9.950,rs17432531,0.005  
8,9.956,rs12679612,0.005  
8,10.136,rs11136785,0.004  
8,10.235,rs7816996,-0.000  
8,10.251,rs893465,-0.000  
8,10.448,rs7004026,-0.004  
8,10.586,rs17434263,-0.004  
8,10.615,rs6997954,-0.004  
8,10.732,rs7843140,0.000  
8,10.735,rs7817362,0.000  
8,10.780,rs17072336,0.001

8,10.788,rs7818650,0.001  
8,10.925,rs11779265,0.000  
8,11.036,rs4130201,-0.000  
8,11.258,rs4460395,-0.001  
8,11.312,rs6558990,-0.000  
8,11.339,rs7845021,-0.000  
8,11.343,rs1362689,-0.000  
8,11.386,rs9314561,-0.000  
8,11.629,rs7003556,-0.000  
8,11.755,rs1526364,-0.000  
8,12.077,rs10103979,0.004  
8,12.171,rs767239,0.005  
8,12.183,rs4875580,0.005  
8,12.211,rs6998695,0.004  
8,12.252,rs1468385,0.000  
8,12.273,rs727781,0.000  
8,12.285,rs1859595,0.000  
8,12.418,rs2527095,-0.000  
8,12.420,rs2733084,-0.000  
8,12.428,rs2732949,0.000  
8,12.438,rs11777608,0.000  
8,12.474,rs4875607,-0.000  
8,12.489,rs2725661,0.000  
8,12.562,rs2732986,0.002  
8,12.579,rs6992802,0.003  
8,12.597,rs6988955,0.005  
8,12.665,rs10096897,0.010  
8,12.765,rs10112106,0.014  
8,12.934,rs7812557,0.016  
8,12.941,rs9987113,0.017  
8,12.966,rs12682166,0.019  
8,13.012,rs2408100,0.023  
8,13.160,rs1512820,0.030  
8,13.236,rs2703251,0.030  
8,13.273,rs2703263,0.030  
8,13.276,rs2816520,0.030  
8,13.309,rs10503343,0.030  
8,13.593,rs4875678,0.020  
8,13.651,rs6984460,0.022  
8,13.664,rs11783989,0.023  
8,13.725,rs17075950,0.033  
8,13.783,rs10503354,0.034  
8,13.785,rs10503355,0.034  
8,13.829,rs11985779,0.038  
8,13.869,rs17076074,0.047  
8,13.911,rs6983976,0.056  
8,13.995,rs890032,0.101  
8,14.023,rs13260564,0.102  
8,14.034,rs2570660,0.106  
8,14.089,rs7824876,0.104  
8,14.125,rs6992412,0.101  
8,14.148,rs7820429,0.098  
8,14.232,rs6559122,0.082  
8,14.262,rs4537324,0.080  
8,14.397,rs12675721,0.078  
8,14.424,rs13261309,0.082  
8,14.444,rs7005444,0.097  
8,14.539,rs4840830,0.112  
8,14.541,rs17076494,0.106  
8,14.550,rs4840841,0.083  
8,14.665,rs1057187,0.075

8,14.732,rs2442517,0.078  
8,14.743,rs2442513,0.080  
8,14.831,rs3020285,0.094  
8,14.879,rs2442477,0.102  
8,14.954,rs6990020,0.101  
8,14.974,rs2442598,0.107  
8,14.977,rs17623313,0.108  
8,14.991,rs4478599,0.134  
8,15.088,rs2959779,0.144  
8,15.093,rs3020246,0.144  
8,15.102,rs9657427,0.145  
8,15.123,rs2442562,0.147  
8,15.126,rs17631450,0.147  
8,15.207,rs2042668,0.162  
8,15.434,rs6559174,0.158  
8,15.438,rs6559175,0.158  
8,15.474,rs6559176,0.161  
8,15.479,rs1014199,0.160  
8,15.926,rs7012528,0.130  
8,16.027,rs2912089,0.140  
8,16.063,rs9693942,0.151  
8,16.098,rs12381471,0.149  
8,16.132,rs9773025,0.146  
8,16.242,rs2977790,0.163  
8,16.244,rs6989229,0.164  
8,16.263,rs2741108,0.177  
8,16.312,rs7826831,0.212  
8,16.322,rs2741718,0.219  
8,16.391,rs7461956,0.240  
8,16.415,rs712276,0.235  
8,16.428,rs2702938,0.230  
8,16.445,rs2738100,0.235  
8,16.516,rs12680018,0.248  
8,16.674,rs4512398,0.243  
8,16.751,rs4392921,0.219  
8,16.777,rs7834209,0.206  
8,17.008,rs4840674,0.180  
8,20.128,rs2979224,0.415  
8,20.185,rs4840939,0.408  
8,20.225,rs2921010,0.404  
8,20.340,rs13277477,0.389  
8,20.437,rs876954,0.377  
8,20.616,rs7822872,0.310  
8,20.645,rs6994806,0.299  
8,20.677,rs7837584,0.321  
8,20.774,rs7843504,0.326  
8,20.995,rs9693402,0.327  
8,21.306,rs2428,0.293  
8,21.399,rs950721,0.321  
8,21.481,rs387706,0.266  
8,21.519,rs10108954,0.294  
8,21.559,rs410487,0.291  
8,21.599,rs332017,0.273  
8,22.020,rs2100021,0.204  
8,22.184,rs17155367,0.184  
8,22.203,rs1011158,0.180  
8,22.215,rs17657675,0.152  
8,22.221,rs330085,0.153  
8,22.225,rs330069,0.154  
8,22.245,rs6989535,0.181  
8,22.248,rs1993596,0.192

8,22.255,rs4240625,0.217  
8,22.262,rs1574517,0.236  
8,22.308,rs11249929,0.248  
8,22.389,rs9644708,0.255  
8,22.473,rs7820910,0.268  
8,22.475,rs587059,0.268  
8,22.481,rs7815168,0.273  
8,22.580,rs2975696,0.296  
8,22.582,rs2975684,0.296  
8,22.584,rs6997416,0.296  
8,22.587,rs7001821,0.297  
8,22.607,rs12680918,0.310  
8,22.608,rs7816713,0.311  
8,22.627,rs11249994,0.323  
8,22.631,rs17151885,0.329  
8,22.647,rs10903327,0.349  
8,22.651,rs17151969,0.352  
8,22.665,rs4840487,0.399  
8,22.691,rs7011457,0.378  
8,22.704,rs4841386,0.382  
8,22.709,rs4841394,0.378  
8,22.716,rs4404875,0.373  
8,22.720,rs11986177,0.378  
8,22.743,rs7823200,0.463  
8,22.755,rs12544976,0.471  
8,22.811,rs2409667,0.395  
8,22.929,rs17152978,0.389  
8,23.032,rs2898280,0.279  
8,23.064,rs3816668,0.282  
8,23.074,rs2898290,0.287  
8,23.080,rs11783137,0.284  
8,23.090,rs2249831,0.287  
8,23.099,rs2100965,0.263  
8,23.101,rs1564265,0.262  
8,23.141,rs804282,0.240  
8,23.152,rs6982453,0.250  
8,23.153,rs1043180,0.251  
8,23.181,rs1293288,0.273  
8,23.198,rs4272426,0.280  
8,23.218,rs9644758,0.283  
8,23.227,rs4841662,0.281  
8,23.513,rs4437649,0.331  
8,23.523,rs6530980,0.326  
8,23.546,rs6981317,0.314  
8,23.547,rs4602886,0.322  
8,23.548,rs12548516,0.325  
8,23.552,rs4574847,0.331  
8,23.554,rs7834631,0.440  
8,23.560,rs6991079,0.529  
8,23.606,rs530515,0.501  
8,23.629,rs579253,0.507  
8,23.786,rs601101,0.540  
8,23.834,rs507846,0.541  
8,24.409,rs532841,0.576  
8,24.644,rs12541254,0.608  
8,24.658,rs9325866,0.655  
8,24.699,rs10503435,0.678  
8,24.827,rs7015031,0.737  
8,24.892,rs10109292,0.737  
8,25.249,rs7814428,0.814  
8,25.253,rs4376497,0.814

8,25.287,rs11987048,0.836  
8,25.296,rs10089628,0.790  
8,25.297,rs1160220,0.786  
8,25.315,rs6989489,0.773  
8,25.360,rs11203501,0.722  
8,25.361,rs10503462,0.721  
8,25.362,rs10089460,0.722  
8,25.374,rs7008403,0.722  
8,25.387,rs3849006,0.746  
8,25.397,rs1947919,0.752  
8,25.434,rs1973227,0.772  
8,25.479,rs2054608,0.721  
8,25.525,rs968864,0.710  
8,25.526,rs7016993,0.710  
8,25.559,rs1520752,0.705  
8,25.587,rs4268131,0.708  
8,25.601,rs11780201,0.713  
8,25.616,rs7828991,0.718  
8,25.618,rs10503468,0.720  
8,25.631,rs17118370,0.732  
8,25.641,rs12682570,0.739  
8,25.644,rs11203571,0.741  
8,25.711,rs3888260,0.806  
8,25.715,rs7841810,0.809  
8,25.765,rs13266960,0.853  
8,25.769,rs17118860,0.856  
8,25.780,rs9886428,0.858  
8,25.880,rs6530767,0.881  
8,25.917,rs1903597,0.889  
8,25.932,rs3848991,0.889  
8,25.947,rs12682277,0.889  
8,25.967,rs17119719,0.888  
8,25.973,rs4831602,0.889  
8,26.004,rs11203633,0.895  
8,26.016,rs12542406,0.898  
8,26.034,rs6983709,0.902  
8,26.060,rs10097849,0.930  
8,26.126,rs6980965,1.002  
8,26.132,rs7846701,1.009  
8,26.173,rs4831658,1.023  
8,26.175,rs4345555,1.018  
8,26.190,rs17120493,0.992  
8,26.192,rs13251017,0.989  
8,26.194,rs10216426,0.980  
8,26.194,rs7815606,0.978  
8,26.203,rs7844246,0.898  
8,26.203,rs1869578,0.897  
8,26.217,rs7832875,0.898  
8,26.226,rs4831685,0.900  
8,26.230,rs478019,0.899  
8,26.230,rs554891,0.899  
8,26.232,rs11997676,0.892  
8,26.244,rs573856,0.849  
8,26.294,rs12544670,0.964  
8,26.294,rs7827335,0.965  
8,26.308,rs6985514,1.082  
8,26.317,rs17675663,1.158  
8,26.325,rs2604316,1.206  
8,26.337,rs2736070,1.273  
8,26.344,rs2736043,1.377  
8,26.450,rs10108727,1.423

8,26.474,rs4291272,1.427  
8,26.478,rs7012411,1.422  
8,26.566,rs2898432,1.285  
8,26.738,rs4831803,1.229  
8,26.889,rs1484751,1.203  
8,26.977,rs899683,1.209  
8,27.145,rs1429644,1.197  
8,27.153,rs1366960,1.196  
8,27.580,rs11780907,1.125  
8,27.727,rs822278,1.153  
8,27.841,rs7012141,1.153  
8,27.877,rs822241,1.148  
8,27.939,rs6996349,1.127  
8,27.981,rs971797,1.086  
8,28.021,rs652078,1.048  
8,28.081,rs611863,1.036  
8,28.094,rs635070,1.039  
8,28.103,rs572151,1.041  
8,28.173,rs6990377,1.052  
8,28.195,rs1565741,1.067  
8,28.305,rs823602,1.172  
8,28.342,rs2055092,1.199  
8,28.410,rs709845,1.281  
8,28.412,rs850429,1.297  
8,28.419,rs2517010,1.432  
8,28.491,rs2285261,1.470  
8,28.601,rs2213901,1.366  
8,28.623,rs4922265,1.400  
8,28.627,rs6984752,1.405  
8,28.648,rs2705195,1.427  
8,28.939,rs1858709,1.387  
8,28.948,rs4593587,1.454  
8,29.049,rs10087746,1.265  
8,29.065,rs17124483,1.250  
8,29.108,rs1003299,1.151  
8,29.131,rs13271465,1.155  
8,29.188,rs4554505,1.297  
8,29.264,rs4921552,1.385  
8,29.269,rs2720540,1.405  
8,29.316,rs2705084,1.664  
8,29.327,rs2588233,1.679  
8,29.366,rs2720588,1.740  
8,29.408,rs9792165,1.693  
8,29.428,rs2588152,1.665  
8,29.436,rs2246488,1.664  
8,29.593,rs7000487,1.799  
8,29.621,rs374386,1.874  
8,29.629,rs10503603,1.880  
8,29.697,rs2904748,1.829  
8,29.757,rs17125353,1.870  
8,29.868,rs10503644,1.944  
8,30.262,rs17692671,2.001  
8,30.323,rs11774166,1.924  
8,30.422,rs987341,1.955  
8,30.459,rs6992951,1.896  
8,30.609,rs17126406,2.025  
8,30.624,rs17594712,2.037  
8,30.658,rs7357578,2.057  
8,30.764,rs1602782,2.094  
8,30.784,rs13254048,2.094  
8,30.892,rs6998197,2.084



8,30.929,rs2201554,2.063  
8,30.951,rs7817770,2.127  
8,31.014,rs13250636,2.042  
8,31.139,rs2717728,1.960  
8,31.195,rs12675535,1.908  
8,31.214,rs2634449,1.908  
8,31.331,rs722311,1.915  
8,31.339,rs11785801,1.918  
8,31.371,rs11990818,1.932  
8,31.372,rs12676446,1.933  
8,31.539,rs13439396,2.105  
8,31.548,rs1473482,2.112  
8,31.597,rs12541534,2.139  
8,31.655,rs335246,2.170  
8,31.699,rs11778064,2.191  
8,31.712,rs2638659,2.410  
8,31.765,rs6982585,2.257  
8,31.775,rs7833694,2.235  
8,31.947,rs12155975,2.145  
8,31.982,rs17127474,2.151  
8,32.090,rs10216388,2.161  
8,32.207,rs7838501,2.102  
8,32.255,rs1027803,2.075  
8,32.267,rs17127771,2.049  
8,32.274,rs1472834,2.033  
8,32.297,rs10101681,1.937  
8,32.298,rs6651477,1.937  
8,32.326,rs10108465,1.924  
8,32.332,rs4921994,1.897  
8,32.342,rs2048091,1.843  
8,32.409,rs692512,1.803  
8,32.498,rs12544783,1.689  
8,32.528,rs6982478,1.667  
8,32.552,rs1619605,1.627  
8,32.585,rs1193327,1.627  
8,32.590,rs12544391,1.626  
8,32.635,rs1915418,1.610  
8,32.664,rs1877856,1.528  
8,32.679,rs11786215,1.504  
8,32.712,rs9644625,1.477  
8,32.713,rs2683279,1.476  
8,32.902,rs11995233,1.553  
8,33.038,rs11204038,1.589  
8,33.103,rs7835461,1.604  
8,33.402,rs13255998,1.556  
8,33.504,rs2975419,1.654  
8,33.506,rs17128749,1.633  
8,33.508,rs4921662,1.615  
8,33.510,rs10503658,1.587  
8,33.512,rs2979874,1.569  
8,33.532,rs10283283,1.565  
8,33.560,rs7003476,1.555  
8,33.594,rs923768,1.669  
8,33.695,rs10503661,1.872  
8,33.702,rs1388943,1.880  
8,33.746,rs6983139,1.987  
8,33.748,rs10503663,1.988  
8,33.797,rs6996964,1.996  
8,33.948,rs1316738,1.965  
8,34.021,rs767145,2.095  
8,34.071,rs7822518,2.130

8,34.072,rs3898938,2.131  
8,34.156,rs7009128,2.185  
8,34.208,rs253,2.214  
8,34.338,rs2410630,2.289  
8,34.414,rs4424271,2.406  
8,34.435,rs1018077,2.464  
8,34.436,rs1039122,2.467  
8,34.450,rs10503670,2.499  
8,34.493,rs7841346,2.551  
8,34.505,rs1390939,2.563  
8,34.557,rs952149,2.793  
8,34.557,rs952148,2.704  
8,34.582,rs4921697,2.774  
8,34.597,rs1532445,2.781  
8,34.604,rs10107110,2.793  
8,34.604,rs17092214,2.799  
8,34.607,rs4922151,2.899  
8,34.616,rs7835387,2.922  
8,34.645,rs17412325,2.986  
8,34.651,rs4921702,3.001  
8,34.662,rs1021201,3.006  
8,34.686,rs17092273,3.038  
8,34.838,rs6993760,3.231  
8,34.904,rs9325872,3.227  
8,34.936,rs2198011,3.214  
8,35.077,rs2259029,3.196  
8,35.095,rs17493272,3.193  
8,35.141,rs1868664,3.187  
8,35.365,rs7000415,3.039  
8,35.555,rs4961396,3.051  
8,35.695,rs17605349,2.995  
8,35.759,rs510395,2.868  
8,35.845,rs536554,2.834  
8,35.944,rs7821595,2.791  
8,35.977,rs11204153,2.786  
8,36.127,rs7813936,2.770  
8,36.254,rs12549890,2.701  
8,36.255,rs11990863,2.700  
8,36.303,rs898647,2.671  
8,36.352,rs2613671,2.658  
8,36.527,rs17093744,2.822  
8,36.590,rs2631879,2.870  
8,36.610,rs6998973,2.877  
8,36.631,rs1841195,2.890  
8,36.679,rs2631889,2.853  
8,36.794,rs2045563,2.887  
8,36.802,rs999055,2.910  
8,36.833,rs4739199,2.973  
8,36.841,rs4606049,2.995  
8,36.870,rs1964328,3.049  
8,37.088,rs7013365,3.190  
8,37.296,rs1564480,3.130  
8,37.459,rs6984623,3.416  
8,37.553,rs4739285,3.494  
8,37.603,rs6587004,3.645  
8,37.630,rs11786696,3.539  
8,37.630,rs6587006,3.537  
8,37.807,rs922504,3.445  
8,38.250,rs10097055,3.034  
8,38.252,rs7812993,3.122  
8,38.311,rs3857979,3.042

8,38.448,rs7831190,2.927  
8,38.507,rs4565458,2.861  
8,38.548,rs6986916,2.845  
8,38.676,rs12545568,2.791  
8,38.950,rs1600877,2.546  
8,39.310,rs11985023,2.222  
8,39.325,rs17088531,2.205  
8,39.404,rs4872533,2.097  
8,39.436,rs7388527,2.086  
8,39.441,rs1047406,2.083  
8,39.635,rs7841894,2.019  
8,39.647,rs17088602,2.004  
8,39.720,rs1877674,1.898  
8,39.817,rs17676811,1.892  
8,39.976,rs4872011,1.894  
8,40.084,rs17088625,1.808  
8,40.331,rs12677017,1.842  
8,40.624,rs1876875,1.900  
8,40.803,rs11785599,1.876  
8,40.811,rs7834266,1.880  
8,40.846,rs11135693,1.667  
8,40.928,rs7843320,1.766  
8,40.944,rs4242391,1.789  
8,40.953,rs13257094,1.813  
8,40.953,rs7464769,1.806  
8,41.007,rs2230229,1.911  
8,41.022,rs6557634,1.918  
8,41.090,rs3736025,2.023  
8,41.095,rs4581063,2.022  
8,41.121,rs17089022,2.062  
8,41.137,rs2272761,2.121  
8,41.147,rs2280937,2.118  
8,41.150,rs3808528,2.117  
8,41.161,rs11135724,2.182  
8,41.180,rs11775841,2.129  
8,41.196,rs883524,2.076  
8,41.255,rs8180974,2.054  
8,41.258,rs7017737,2.055  
8,41.392,rs732563,2.115  
8,41.424,rs11775345,2.109  
8,41.456,rs1008856,2.083  
8,41.478,rs2978473,2.065  
8,41.504,rs3174040,2.064  
8,41.553,rs11135759,2.116  
8,41.570,rs7003364,2.137  
8,41.627,rs1512268,1.987  
8,41.660,rs4872179,1.993  
8,41.682,rs7844903,2.006  
8,41.742,rs310282,2.025  
8,41.755,rs7832345,2.030  
8,41.755,rs192841,2.030  
8,41.871,rs1369836,2.212  
8,41.909,rs819198,2.304  
8,41.980,rs1731263,2.414  
8,42.161,rs7016438,2.382  
8,42.312,rs17051701,2.330  
8,42.430,rs436760,2.275  
8,42.512,rs7829965,2.094  
8,42.524,rs4242406,2.067  
8,42.531,rs13279576,2.058  
8,42.733,rs4472524,2.099

8,42.761,rs7831504,2.103  
8,42.820,rs11135811,2.113  
8,43.028,rs1824190,2.214  
8,43.067,rs984923,2.231  
8,43.122,rs7010085,2.185  
8,43.277,rs169061,2.097  
8,43.306,rs17830392,2.070  
8,43.352,rs13264292,2.026  
8,43.399,rs1527033,1.983  
8,43.504,rs879958,1.917  
8,43.592,rs11774796,1.947  
8,43.622,rs1510758,1.958  
8,43.740,rs907157,2.122  
8,43.803,rs11783334,2.024  
8,43.805,rs2433086,2.023  
8,43.809,rs17802005,2.001  
8,43.814,rs993047,1.973  
8,43.819,rs881367,1.967  
8,43.843,rs2433101,1.941  
8,43.859,rs11997651,1.926  
8,44.037,rs1978544,1.981  
8,44.093,rs4872367,1.994  
8,44.143,rs17054447,1.980  
8,44.248,rs6991347,1.947  
8,44.343,rs17237257,1.854  
8,44.345,rs17237292,1.852  
8,44.364,rs4872381,1.838  
8,44.378,rs17054698,1.830  
8,44.391,rs6991575,1.823  
8,44.401,rs11984569,1.815  
8,44.419,rs7001120,1.791  
8,44.422,rs10866846,1.790  
8,44.568,rs6557880,1.721  
8,44.630,rs11787090,1.716  
8,44.659,rs2976302,1.694  
8,44.686,rs6987909,1.689  
8,44.791,rs10098922,1.667  
8,44.828,rs13250131,1.674  
8,44.876,rs4531067,1.666  
8,44.952,rs17245857,1.657  
8,44.962,rs4602893,1.656  
8,45.036,rs9650418,1.648  
8,45.090,rs7838409,1.650  
8,45.250,rs1042992,1.650  
8,45.292,rs6557919,1.647  
8,45.553,rs424138,1.736  
8,45.593,rs327234,1.753  
8,45.738,rs7845740,1.788  
8,45.821,rs7820310,1.820  
8,45.842,rs2028554,1.831  
8,45.868,rs6998714,1.809  
8,45.880,rs1965328,1.804  
8,45.977,rs2055195,1.759  
8,46.042,rs13257637,1.930  
8,46.078,rs472151,2.081  
8,46.093,rs3102087,2.093  
8,46.118,rs11782159,2.110  
8,46.200,rs839201,2.178  
8,46.251,rs1481653,2.209  
8,46.401,rs7842266,2.227  
8,46.420,rs2874755,2.226

8,46.438,rs2014617,2.305  
8,47.159,rs11136015,2.361  
8,47.276,rs2726960,2.243  
8,47.288,rs6999364,2.232  
8,47.309,rs2685320,2.312  
8,47.353,rs2726942,2.288  
8,47.422,rs11787294,2.268  
8,47.448,rs1984880,2.182  
8,47.462,rs12549429,2.145  
8,47.475,rs9644136,2.106  
8,47.478,rs13274329,2.101  
8,47.522,rs4732823,2.057  
8,47.618,rs7840565,2.144  
8,47.677,rs2100814,2.178  
8,47.690,rs2722924,2.173  
8,47.711,rs13263030,2.155  
8,47.740,rs7825480,2.253  
8,47.752,rs351776,2.296  
8,47.883,rs11784510,2.379  
8,47.896,rs924184,2.382  
8,47.903,rs17059088,2.474  
8,47.907,rs1060411,2.515  
8,47.947,rs6992329,2.275  
8,47.985,rs1908916,2.321  
8,48.106,rs6980605,2.442  
8,48.216,rs352428,2.510  
8,48.231,rs6985395,2.514  
8,48.292,rs171302,2.504  
8,48.402,rs2237813,2.483  
8,48.450,rs241149,2.453  
8,49.014,rs6999630,2.099  
8,49.381,rs597695,1.919  
8,49.541,rs2637822,1.804  
8,49.605,rs2670683,1.801  
8,49.611,rs2175835,1.789  
8,49.640,rs6995249,1.710  
8,49.702,rs11786009,1.618  
8,49.708,rs2341797,1.614  
8,49.821,rs4295704,1.536  
8,49.952,rs6994244,1.407  
8,49.957,rs4732980,1.401  
8,50.052,rs12546747,1.320  
8,50.078,rs7016719,1.319  
8,50.233,rs6982080,1.347  
8,50.242,rs7813195,1.439  
8,50.248,rs7827693,1.542  
8,50.383,rs16876083,1.615  
8,50.427,rs12547428,1.636  
8,50.459,rs7386992,1.649  
8,50.534,rs10101117,1.707  
8,50.635,rs2595042,1.664  
8,50.663,rs9297181,1.647  
8,50.806,rs12386822,1.667  
8,51.176,rs4733476,1.735  
8,51.194,rs7015785,1.740  
8,51.272,rs9642710,1.759  
8,51.459,rs952774,1.764  
8,51.712,rs7812836,1.705  
8,51.943,rs7833229,1.677  
8,52.304,rs2543600,1.635  
8,52.363,rs2725344,1.625

8,52.412,rs1800392,1.611  
8,52.452,rs4398867,1.630  
8,52.472,rs2553244,1.639  
8,52.480,rs2737374,1.661  
8,52.501,rs10954782,1.711  
8,52.503,rs11998012,1.718  
8,52.521,rs4733070,1.691  
8,52.551,rs4609156,1.732  
8,52.573,rs4400341,1.827  
8,52.624,rs1836851,1.872  
8,52.659,rs10954784,1.884  
8,52.721,rs9792249,1.847  
8,52.743,rs11784670,1.893  
8,52.747,rs7817546,1.903  
8,52.769,rs4452759,1.874  
8,52.912,rs776404,1.855  
8,52.931,rs776385,1.848  
8,53.015,rs1481763,1.689  
8,53.031,rs16878890,1.696  
8,53.069,rs10503901,1.711  
8,53.081,rs989465,1.715  
8,53.088,rs6992010,1.717  
8,53.090,rs900102,1.714  
8,53.208,rs6985581,1.667  
8,53.226,rs17645417,1.675  
8,53.281,rs2466062,1.720  
8,53.287,rs3924999,1.643  
8,53.321,rs13259346,1.682  
8,53.338,rs6468122,1.704  
8,53.357,rs2976525,1.730  
8,53.682,rs9656744,1.644  
8,53.695,rs10100444,1.635  
8,53.893,rs6468141,1.494  
8,53.976,rs7815128,1.478  
8,54.086,rs1996363,1.404  
8,54.099,rs10954910,1.392  
8,54.127,rs13439524,1.359  
8,54.155,rs12114673,1.326  
8,54.182,rs4469412,1.293  
8,54.202,rs6997661,1.276  
8,54.349,rs4520153,1.192  
8,54.486,rs1950045,1.007  
8,54.500,rs1919344,0.987  
8,54.509,rs9297238,1.020  
8,54.514,rs10113333,1.048  
8,54.538,rs2579892,1.082  
8,54.877,rs7845368,1.025  
8,54.910,rs1946745,1.015  
8,54.912,rs17270119,1.015  
8,54.913,rs10112630,1.015  
8,54.946,rs16884264,1.016  
8,55.410,rs12114308,1.026  
8,55.432,rs7814863,1.009  
8,55.463,rs7831942,1.020  
8,55.542,rs7463174,1.067  
8,55.585,rs4976893,1.034  
8,55.603,rs16887042,1.024  
8,55.610,rs17433803,1.020  
8,55.663,rs12541064,1.033  
8,55.701,rs2070493,1.022  
8,55.738,rs7812866,1.010

8,56.189,rs6474491,0.835  
8,56.611,rs13248631,0.800  
8,56.783,rs328294,0.797  
8,56.907,rs921802,0.730  
8,56.915,rs4733924,0.731  
8,56.928,rs1466050,0.724  
8,56.968,rs7832232,0.716  
8,56.982,rs7818839,0.660  
8,56.999,rs1447057,0.645  
8,57.037,rs6983695,0.652  
8,57.048,rs6985355,0.705  
8,57.144,rs4394356,0.752  
8,57.174,rs6474512,0.808  
8,57.193,rs6998933,0.815  
8,57.200,rs7015219,0.815  
8,57.296,rs11985898,0.810  
8,57.467,rs6474131,0.863  
8,57.674,rs6474166,0.909  
8,57.711,rs201982,0.927  
8,57.714,rs2122987,0.928  
8,57.825,rs3808606,0.963  
8,57.845,rs13248917,1.008  
8,57.913,rs2955864,1.177  
8,57.917,rs2929106,1.188  
8,57.939,rs1904906,1.150  
8,57.940,rs16888736,1.149  
8,57.950,rs16888778,1.179  
8,57.962,rs10113242,1.212  
8,57.992,rs10504018,1.193  
8,58.062,rs2925034,1.155  
8,58.294,rs2168282,1.116  
8,58.325,rs909293,1.063  
8,58.326,rs210662,1.062  
8,58.345,rs3736646,1.008  
8,58.350,rs210676,1.000  
8,58.364,rs7013912,0.972  
8,58.405,rs210705,0.951  
8,58.469,rs210866,0.926  
8,58.512,rs891404,0.932  
8,58.681,rs10091962,0.941  
8,58.755,rs1429948,0.954  
8,58.776,rs2599675,0.937  
8,58.830,rs1451687,0.877  
8,58.837,rs1562906,0.883  
8,58.876,rs1111280,0.915  
8,59.128,rs7835606,0.942  
8,59.139,rs870478,0.943  
8,59.143,rs7837405,0.988  
8,59.143,rs868586,0.997  
8,59.149,rs13264148,1.001  
8,59.174,rs1022194,1.018  
8,59.277,rs11783346,1.071  
8,59.370,rs6995294,1.046  
8,59.508,rs3847182,1.051  
8,60.082,rs7007458,1.072  
8,60.109,rs13266712,1.074  
8,60.188,rs10958660,1.090  
8,60.736,rs1127379,1.209  
8,60.930,rs968427,1.126  
8,60.939,rs717218,1.147  
8,60.940,rs4736805,1.152

8,60.944,rs6474334,1.159  
8,60.954,rs16890610,1.185  
8,60.964,rs7819949,1.183  
8,60.974,rs7837006,1.182  
8,60.975,rs17600200,1.179  
8,60.995,rs7016707,1.199  
8,60.997,rs521184,1.201  
8,60.999,rs6981979,1.215  
8,61.011,rs1362890,1.183  
8,61.012,rs2883727,1.176  
8,61.013,rs7833494,1.169  
8,61.015,rs4737018,1.139  
8,61.017,rs10101217,1.124  
8,61.020,rs4737021,1.094  
8,61.035,rs7008906,1.108  
8,61.044,rs12546107,1.128  
8,61.059,rs13270574,1.120  
8,61.108,rs2978457,1.074  
8,61.116,rs13281070,1.064  
8,61.153,rs16891604,1.042  
8,61.167,rs6474422,1.033  
8,62.125,rs4608108,1.128  
8,62.176,rs7003908,1.173  
8,62.193,rs8178017,1.189  
8,62.219,rs4873777,1.188  
8,62.232,rs7005646,1.188  
8,62.232,rs7004442,1.188  
8,62.472,rs1828494,1.197  
8,62.778,rs7828647,1.162  
8,62.975,rs13273663,1.118  
8,63.782,rs10102468,1.071  
8,63.917,rs12335199,1.083  
8,64.096,rs2017341,1.095  
8,64.156,rs17181677,1.133  
8,64.225,rs6473628,1.243  
8,64.228,rs16916554,1.242  
8,64.229,rs7834664,1.242  
8,64.250,rs16916598,1.238  
8,64.423,rs12545812,1.299  
8,64.459,rs10504130,1.306  
8,64.513,rs3815868,1.319  
8,64.640,rs2360805,1.345  
8,64.676,rs7830945,1.352  
8,64.830,rs714048,1.369  
8,64.899,rs10504140,1.375  
8,64.999,rs7824696,1.382  
8,65.085,rs13258413,1.387  
8,65.274,rs1965704,1.321  
8,65.314,rs16917805,1.276  
8,65.390,rs3758126,1.097  
8,65.489,rs10958322,1.075  
8,65.521,rs984309,1.123  
8,65.594,rs17252015,1.129  
8,65.675,rs6473743,1.149  
8,65.741,rs3860850,1.051  
8,65.809,rs569706,1.064  
8,65.813,rs2588084,1.064  
8,65.870,rs7824346,1.058  
8,66.066,rs1373387,1.035  
8,66.153,rs1425898,1.034  
8,66.178,rs966247,1.059



8,66.221,rs6985606,1.072  
8,66.460,rs10958357,1.098  
8,66.480,rs2008573,1.097  
8,66.622,rs10504154,1.106  
8,66.638,rs11992458,1.108  
8,67.097,rs7016502,1.081  
8,67.133,rs11783925,1.077  
8,67.230,rs12708158,1.085  
8,67.264,rs11783652,1.091  
8,67.411,rs311396,1.127  
8,67.426,rs2719355,1.081  
8,67.428,rs895822,1.121  
8,67.429,rs2594797,1.138  
8,67.429,rs2956788,1.138  
8,67.430,rs1349101,1.137  
8,67.433,rs16920210,1.134  
8,67.443,rs10108776,1.059  
8,67.446,rs9657161,1.060  
8,67.447,rs12674538,1.062  
8,67.449,rs4739035,1.067  
8,67.451,rs16920613,1.070  
8,67.501,rs1396895,1.123  
8,67.567,rs11996465,1.135  
8,67.614,rs10958434,1.139  
8,67.682,rs3934874,1.157  
8,67.862,rs1480764,1.282  
8,67.954,rs7009231,1.319  
8,68.093,rs4737297,1.334  
8,68.098,rs6998105,1.339  
8,68.167,rs1506672,1.412  
8,68.190,rs951256,1.344  
8,68.193,rs2929032,1.332  
8,68.198,rs1395393,1.303  
8,68.210,rs4236995,1.272  
8,68.216,rs10107657,1.262  
8,68.224,rs4737395,1.216  
8,68.225,rs7011147,1.213  
8,68.237,rs7816281,1.171  
8,68.248,rs7827790,1.153  
8,68.252,rs7820484,1.146  
8,68.255,rs1397976,1.141  
8,68.261,rs7828258,1.154  
8,68.271,rs12674523,1.182  
8,68.278,rs4641033,1.209  
8,68.292,rs7833986,1.261  
8,68.297,rs7826445,1.261  
8,68.440,rs7007715,1.243  
8,68.469,rs12543030,1.241  
8,68.517,rs7011835,1.242  
8,68.535,rs1866823,1.309  
8,68.536,rs6474069,1.311  
8,68.562,rs2610027,1.229  
8,68.580,rs2582413,1.169  
8,68.627,rs10097622,1.189  
8,68.943,rs1834413,1.253  
8,68.981,rs9298556,1.255  
8,69.004,rs7821860,1.255  
8,69.049,rs7812952,1.245  
8,69.056,rs889975,1.245  
8,69.084,rs11786143,1.210  
8,69.131,rs8718,1.150

8,69.217,rs6474097,1.123  
8,69.379,rs10089625,1.164  
8,69.528,rs10957001,1.210  
8,69.620,rs10099945,1.228  
8,69.716,rs6992409,1.269  
8,69.742,rs10957014,1.280  
8,69.761,rs4737472,1.288  
8,69.794,rs1436001,1.238  
8,69.823,rs1157270,1.196  
8,69.844,rs10091209,1.161  
8,69.847,rs1436006,1.151  
8,69.862,rs6997028,1.208  
8,69.894,rs6988560,1.234  
8,69.942,rs4737483,1.204  
8,69.951,rs6987258,1.190  
8,70.002,rs11780747,1.106  
8,70.010,rs10100238,1.092  
8,70.037,rs16923020,1.191  
8,70.070,rs7010991,1.222  
8,70.086,rs4738648,1.253  
8,70.093,rs2939966,1.261  
8,70.139,rs6471689,1.154  
8,70.151,rs2977370,1.165  
8,70.280,rs4379435,1.269  
8,70.285,rs13268967,1.273  
8,70.286,rs930872,1.273  
8,70.286,rs10504253,1.273  
8,70.452,rs2680903,1.262  
8,70.454,rs2255834,1.262  
8,70.461,rs7841618,1.259  
8,70.499,rs973807,1.233  
8,70.511,rs4737508,1.232  
8,70.534,rs13266837,1.231  
8,70.578,rs2634507,1.229  
8,70.601,rs16923878,1.244  
8,70.622,rs998791,1.271  
8,70.625,rs10957071,1.284  
8,70.632,rs826727,1.296  
8,70.680,rs6984917,1.159  
8,70.697,rs1562612,1.135  
8,70.748,rs1463140,1.136  
8,70.824,rs10504272,1.131  
8,70.931,rs4737532,1.083  
8,71.004,rs396720,1.060  
8,71.006,rs4737534,1.059  
8,71.139,rs10112035,1.007  
8,71.561,rs12375413,1.012  
8,71.572,rs7006620,1.013  
8,71.623,rs7837791,0.997  
8,71.789,rs6987780,0.937  
8,71.837,rs12680662,0.926  
8,71.889,rs11775907,0.919  
8,71.968,rs10957100,0.945  
8,72.078,rs10957108,0.965  
8,72.136,rs6471842,0.982  
8,72.482,rs6984526,1.004  
8,72.592,rs6982717,1.005  
8,72.721,rs7013829,1.011  
8,72.989,rs623917,1.021  
8,73.088,rs10957157,1.022  
8,73.107,rs13256023,1.022

8,73.308,rs4237042,1.032  
8,73.336,rs13251621,1.032  
8,73.344,rs6984384,1.032  
8,73.379,rs7846503,1.048  
8,73.410,rs4554462,1.076  
8,73.451,rs12678105,1.141  
8,73.546,rs1962862,1.217  
8,73.547,rs1871217,1.217  
8,73.576,rs12548301,1.213  
8,73.637,rs2979419,1.185  
8,73.727,rs10104116,1.165  
8,74.121,rs10094788,1.198  
8,74.737,rs4625030,1.262  
8,74.775,rs6985520,1.265  
8,74.789,rs4269537,1.269  
8,74.797,rs7009135,1.231  
8,74.801,rs1580702,1.154  
8,74.803,rs1495008,1.114  
8,74.804,rs13260889,1.072  
8,74.833,rs7824027,1.057  
8,74.835,rs6471977,1.055  
8,74.841,rs657284,1.053  
8,74.853,rs344220,1.046  
8,74.863,rs12675739,1.039  
8,74.909,rs6995731,1.008  
8,74.983,rs12544945,1.016  
8,75.054,rs17265947,1.030  
8,75.074,rs1455576,1.032  
8,75.095,rs16930057,1.039  
8,75.132,rs6472077,1.052  
8,75.175,rs4739066,1.051  
8,75.226,rs12114802,1.048  
8,75.236,rs7465268,1.047  
8,75.237,rs12156261,1.047  
8,75.239,rs7003951,1.047  
8,75.243,rs6472089,1.102  
8,75.282,rs6472100,1.091  
8,75.286,rs10112358,1.090  
8,75.340,rs1431586,1.081  
8,75.401,rs7827889,1.071  
8,75.603,rs919037,1.036  
8,75.611,rs2114018,1.036  
8,75.637,rs10093096,1.030  
8,75.773,rs16930969,1.005  
8,75.913,rs7836768,0.975  
8,75.941,rs1376771,0.941  
8,75.949,rs6981465,0.925  
8,76.003,rs10808738,0.886  
8,76.014,rs2002700,0.912  
8,76.027,rs7004914,0.908  
8,76.083,rs2956305,0.903  
8,76.091,rs7842129,0.892  
8,76.143,rs12544654,0.821  
8,76.178,rs4294223,0.781  
8,76.183,rs4737206,0.731  
8,76.287,rs7815138,0.688  
8,76.414,rs1473603,0.691  
8,76.632,rs16932321,0.613  
8,76.633,rs17396080,0.612  
8,76.655,rs974149,0.603  
8,76.785,rs6472239,0.561

8,76.811,rs16932422,0.551  
8,76.820,rs2357668,0.504  
8,76.825,rs9298109,0.503  
8,76.880,rs9643575,0.494  
8,76.884,rs16932561,0.492  
8,76.957,rs16932725,0.447  
8,76.964,rs11779466,0.442  
8,76.973,rs7819605,0.434  
8,77.008,rs1426908,0.433  
8,77.321,rs7006064,0.512  
8,77.482,rs12677893,0.520  
8,77.520,rs6472301,0.517  
8,77.637,rs4737846,0.536  
8,77.647,rs13275970,0.550  
8,77.653,rs900114,0.558  
8,77.699,rs13257028,0.628  
8,77.761,rs13250665,0.680  
8,77.763,rs7814240,0.680  
8,77.763,rs2553658,0.680  
8,77.775,rs2623859,0.692  
8,77.784,rs13274503,0.702  
8,77.813,rs10957397,0.750  
8,77.858,rs4737859,0.726  
8,77.918,rs4437632,0.768  
8,77.979,rs6472366,0.830  
8,78.031,rs6997672,0.793  
8,78.064,rs6472376,0.752  
8,78.092,rs4592016,0.716  
8,78.146,rs967258,0.700  
8,78.148,rs11990676,0.702  
8,78.169,rs13251311,0.723  
8,78.195,rs6984885,0.717  
8,78.205,rs17449325,0.707  
8,78.222,rs1155491,0.711  
8,78.225,rs2033581,0.711  
8,78.243,rs728032,0.696  
8,78.262,rs1404598,0.688  
8,78.287,rs10808759,0.691  
8,78.324,rs1404593,0.677  
8,78.347,rs12674787,0.668  
8,78.513,rs2138675,0.733  
8,78.535,rs2591003,0.734  
8,78.573,rs2676638,0.723  
8,78.726,rs13273576,0.685  
8,78.797,rs2164197,0.647  
8,78.900,rs6996725,0.566  
8,78.957,rs4374973,0.605  
8,79.023,rs2978233,0.592  
8,79.052,rs4145295,0.617  
8,79.147,rs9643401,0.788  
8,79.249,rs933938,0.945  
8,79.253,rs17692996,0.966  
8,79.261,rs2981060,1.003  
8,79.279,rs1344618,1.068  
8,79.289,rs514802,1.107  
8,79.311,rs590695,1.144  
8,79.345,rs16935654,1.150  
8,79.518,rs2655167,1.007  
8,79.780,rs6981344,0.875  
8,79.820,rs1155965,0.919  
8,79.915,rs4738003,0.932

8,79.968,rs4279601,0.945  
8,80.054,rs10103580,0.948  
8,80.057,rs16936279,0.948  
8,80.186,rs2933044,1.008  
8,80.202,rs2933039,1.068  
8,80.629,rs7846409,0.990  
8,80.654,rs9987098,0.988  
8,80.798,rs16936522,0.970  
8,80.896,rs4738050,0.964  
8,80.974,rs10095238,0.973  
8,80.996,rs17671921,0.984  
8,81.142,rs10808773,0.960  
8,81.215,rs4737292,1.014  
8,81.249,rs12678469,0.971  
8,81.277,rs7010162,0.973  
8,81.778,rs10504477,0.972  
8,81.811,rs9657093,0.971  
8,82.521,rs2639919,0.979  
8,82.668,rs11995646,0.888  
8,82.683,rs16937345,0.873  
8,82.718,rs7018254,0.834  
8,82.760,rs1075532,0.842  
8,82.807,rs7819928,0.813  
8,82.834,rs4579563,0.784  
8,82.997,rs10957545,0.687  
8,83.028,rs7831023,0.682  
8,83.029,rs7817242,0.681  
8,83.038,rs3779748,0.678  
8,83.045,rs4737316,0.627  
8,83.091,rs11775363,0.722  
8,83.096,rs4560821,0.677  
8,83.129,rs9643625,0.726  
8,83.181,rs11785552,0.706  
8,83.309,rs7824076,0.681  
8,83.364,rs1156154,0.670  
8,83.433,rs4738148,0.601  
8,83.434,rs16937735,0.603  
8,83.437,rs1863108,0.609  
8,83.444,rs10504511,0.621  
8,83.529,rs1424863,0.545  
8,83.532,rs2068674,0.542  
8,83.581,rs3890710,0.561  
8,83.641,rs4738157,0.555  
8,83.651,rs4305943,0.548  
8,83.665,rs10101539,0.537  
8,83.673,rs6472617,0.524  
8,83.680,rs6998291,0.527  
8,83.683,rs10091707,0.528  
8,83.691,rs4078227,0.525  
8,83.707,rs979451,0.519  
8,83.908,rs6472655,0.455  
8,83.930,rs1036963,0.451  
8,83.973,rs6996723,0.485  
8,83.976,rs959974,0.488  
8,84.081,rs7835630,0.435  
8,84.149,rs4737340,0.394  
8,84.181,rs11984631,0.398  
8,84.302,rs11778612,0.412  
8,84.317,rs922784,0.415  
8,84.342,rs7837478,0.409  
8,84.417,rs7844036,0.404

8,84.608,rs7827400,0.351  
8,84.653,rs10504537,0.338  
8,84.665,rs346613,0.333  
8,84.758,rs878927,0.322  
8,85.045,rs4738243,0.356  
8,85.348,rs1554781,0.386  
8,85.406,rs6985810,0.385  
8,86.150,rs4373559,0.369  
8,86.256,rs4143635,0.367  
8,86.284,rs1440332,0.344  
8,86.361,rs7822651,0.339  
8,86.370,rs6472714,0.344  
8,86.389,rs1482022,0.349  
8,86.393,rs2981092,0.349  
8,86.404,rs11786867,0.386  
8,86.506,rs10099824,0.369  
8,86.568,rs7006404,0.347  
8,86.609,rs6472748,0.363  
8,86.637,rs10808793,0.371  
8,86.642,rs2383878,0.372  
8,86.721,rs6472762,0.450  
8,86.730,rs2605877,0.455  
8,86.769,rs12681551,0.456  
8,86.820,rs6989495,0.458  
8,86.869,rs4363185,0.447  
8,86.920,rs6993015,0.444  
8,86.935,rs16938650,0.447  
8,87.015,rs7823459,0.452  
8,87.243,rs17223062,0.400  
8,87.524,rs12547746,0.395  
8,87.629,rs1392125,0.404  
8,87.645,rs16938782,0.404  
8,87.660,rs2036273,0.403  
8,87.706,rs4489317,0.397  
8,87.710,rs6472822,0.396  
8,87.760,rs4385459,0.367  
8,87.779,rs16938822,0.364  
8,87.885,rs6988935,0.381  
8,87.918,rs2975213,0.385  
8,87.943,rs7459665,0.418  
8,87.958,rs12550813,0.417  
8,88.009,rs6472867,0.415  
8,88.033,rs1365032,0.425  
8,88.035,rs10504583,0.426  
8,88.075,rs16938938,0.449  
8,88.165,rs2732018,0.502  
8,88.192,rs1122317,0.468  
8,88.199,rs2731995,0.465  
8,88.221,rs1455813,0.394  
8,88.243,rs1455805,0.408  
8,88.254,rs16939036,0.411  
8,88.289,rs12547658,0.419  
8,88.332,rs7015436,0.443  
8,88.363,rs16939060,0.459  
8,88.377,rs7840945,0.467  
8,88.401,rs2980248,0.443  
8,88.528,rs2167065,0.495  
8,88.597,rs7350068,0.465  
8,88.672,rs4735650,0.399  
8,88.688,rs16939202,0.400  
8,88.905,rs10504618,0.513

8,88.913,rs10504619,0.515  
8,88.931,rs2383971,0.520  
8,88.955,rs6472969,0.475  
8,88.970,rs11996335,0.446  
8,88.972,rs13281210,0.443  
8,89.011,rs9298282,0.447  
8,89.043,rs13279286,0.457  
8,89.160,rs17437854,0.497  
8,89.174,rs2733735,0.458  
8,89.181,rs16939378,0.466  
8,89.215,rs12550004,0.522  
8,89.242,rs6981577,0.572  
8,89.294,rs7016069,0.585  
8,89.300,rs12677622,0.587  
8,89.306,rs10098612,0.596  
8,89.327,rs10112573,0.630  
8,89.428,rs10102256,0.595  
8,89.508,rs7016717,0.585  
8,89.508,rs10504658,0.584  
8,89.540,rs4739176,0.575  
8,89.591,rs2200015,0.633  
8,89.595,rs6473088,0.641  
8,89.602,rs10504671,0.642  
8,89.716,rs967426,0.691  
8,89.728,rs10957895,0.700  
8,89.750,rs3739330,0.713  
8,89.778,rs2587155,0.721  
8,89.780,rs4739111,0.721  
8,89.796,rs10448016,0.754  
8,89.825,rs510494,0.816  
8,89.852,rs16906530,0.819  
8,89.880,rs1915554,0.827  
8,90.052,rs7840008,0.903  
8,90.064,rs4740122,0.899  
8,90.261,rs16907577,0.944  
8,90.268,rs7837761,0.945  
8,90.313,rs6473225,0.961  
8,90.399,rs9298338,0.950  
8,90.508,rs4587368,0.945  
8,90.575,rs272613,0.930  
8,90.600,rs446027,0.957  
8,90.662,rs272610,0.960  
8,90.710,rs11989997,0.961  
8,90.735,rs1026805,0.960  
8,91.403,rs7003901,0.951  
8,91.437,rs1445558,0.954  
8,91.529,rs895270,0.945  
8,91.630,rs6989890,0.926  
8,91.746,rs4237093,0.878  
8,91.759,rs10504730,0.896  
8,91.789,rs4480065,0.935  
8,91.855,rs6986622,0.924  
8,92.044,rs10504737,0.782  
8,92.047,rs10090760,0.780  
8,92.201,rs10100646,0.753  
8,92.204,rs7841723,0.752  
8,92.210,rs2102113,0.750  
8,92.264,rs10958016,0.756  
8,92.273,rs7012437,0.757  
8,92.624,rs16909306,0.770  
8,92.757,rs2581529,0.756

8,92.880,rs2300494,0.750  
8,92.912,rs10481273,0.748  
8,92.981,rs1507090,0.749  
8,93.132,rs16910336,0.747  
8,93.146,rs717498,0.746  
8,93.152,rs925673,0.745  
8,93.248,rs7833831,0.708  
8,93.254,rs7819717,0.707  
8,93.267,rs16910782,0.706  
8,93.300,rs9643765,0.702  
8,93.315,rs7842063,0.735  
8,93.367,rs10109906,0.714  
8,93.422,rs726723,0.745  
8,93.422,rs4739920,0.745  
8,93.469,rs1568528,0.742  
8,93.485,rs6987055,0.741  
8,93.582,rs1552548,0.732  
8,93.692,rs7818253,0.720  
8,93.807,rs1372461,0.720  
8,93.844,rs10808857,0.652  
8,93.860,rs6473525,0.633  
8,93.886,rs9298423,0.580  
8,93.894,rs10112823,0.578  
8,93.947,rs11998502,0.574  
8,94.100,rs1488708,0.563  
8,94.361,rs13278559,0.531  
8,94.406,rs9329911,0.530  
8,94.587,rs7016829,0.555  
8,94.640,rs2912494,0.558  
8,94.644,rs10504817,0.560  
8,94.676,rs17601573,0.573  
8,94.713,rs2721252,0.591  
8,94.751,rs4406372,0.604  
8,94.865,rs11781016,0.643  
8,94.900,rs1441249,0.641  
8,94.931,rs10504826,0.669  
8,94.944,rs7814749,0.672  
8,94.960,rs4961216,0.656  
8,94.963,rs10956972,0.654  
8,95.015,rs13269825,0.513  
8,95.053,rs6468587,0.495  
8,95.067,rs6468613,0.511  
8,95.082,rs2453449,0.452  
8,95.101,rs11986813,0.427  
8,95.142,rs1431761,0.417  
8,95.163,rs2878863,0.416  
8,95.195,rs4961016,0.415  
8,95.280,rs4961033,0.429  
8,95.296,rs7833495,0.432  
8,95.332,rs463809,0.437  
8,95.406,rs2616483,0.449  
8,95.410,rs17719138,0.456  
8,95.423,rs2616496,0.479  
8,95.440,rs2616506,0.509  
8,95.443,rs2664352,0.511  
8,95.451,rs13277637,0.514  
8,95.465,rs16878625,0.514  
8,95.593,rs3851539,0.525  
8,95.823,rs13257525,0.464  
8,95.879,rs10090518,0.474  
8,95.927,rs2454331,0.557



8,95.977,rs13260549,0.554  
8,96.014,rs2706820,0.560  
8,96.050,rs2046316,0.569  
8,96.106,rs13261143,0.594  
8,96.198,rs9297680,0.684  
8,96.202,rs311667,0.680  
8,96.205,rs557807,0.677  
8,96.211,rs218921,0.668  
8,96.213,rs160414,0.666  
8,96.284,rs40457,0.591  
8,96.448,rs1805873,0.610  
8,96.492,rs17623400,0.620  
8,96.983,rs4330650,0.754  
8,97.071,rs4501549,0.762  
8,97.082,rs11785003,0.776  
8,97.127,rs7459480,0.745  
8,97.128,rs6471275,0.745  
8,97.140,rs10504904,0.743  
8,97.143,rs9283962,0.742  
8,97.202,rs6471294,0.752  
8,97.230,rs12681007,0.755  
8,97.235,rs17732285,0.756  
8,97.237,rs4435678,0.756  
8,97.242,rs10095605,0.789  
8,97.244,rs1867307,0.800  
8,97.252,rs6992905,0.787  
8,97.263,rs2218367,0.764  
8,97.343,rs6471322,0.798  
8,97.379,rs2046395,0.802  
8,97.423,rs9657011,0.795  
8,97.482,rs1480889,0.785  
8,97.532,rs9297909,0.803  
8,97.569,rs3735912,0.836  
8,97.651,rs2291016,0.845  
8,97.658,rs6993453,0.851  
8,97.727,rs10097386,0.946  
8,98.101,rs7016705,1.035  
8,98.110,rs1847552,1.037  
8,98.166,rs172159,1.046  
8,98.195,rs279968,1.043  
8,98.225,rs279460,0.987  
8,98.252,rs279479,0.987  
8,98.307,rs278578,0.978  
8,98.316,rs7818649,0.981  
8,98.320,rs2623301,0.983  
8,98.405,rs1447314,1.011  
8,98.441,rs7002977,0.955  
8,98.450,rs16915833,0.950  
8,98.464,rs4735211,0.944  
8,98.471,rs1550883,0.958  
8,98.497,rs368998,1.003  
8,98.551,rs16915889,1.001  
8,98.656,rs7837480,1.109  
8,98.880,rs11995221,1.144  
8,98.886,rs2976370,1.142  
8,98.889,rs11786927,1.142  
8,98.918,rs17710303,1.134  
8,99.107,rs10100603,1.101  
8,99.123,rs7826194,1.101  
8,99.197,rs3133980,1.107  
8,99.255,rs4579497,1.155

8,99.263,rs2978129,1.218  
8,99.269,rs3018851,1.223  
8,99.306,rs2978142,1.221  
8,99.417,rs1051624,1.244  
8,99.478,rs10098632,1.165  
8,99.513,rs2607058,1.161  
8,99.525,rs2100602,1.176  
8,99.557,rs10216999,1.215  
8,99.573,rs17735424,1.235  
8,99.574,rs2514792,1.236  
8,99.777,rs935052,1.326  
8,99.904,rs2119461,1.341  
8,99.938,rs2114212,1.345  
8,100.095,rs6988635,1.272  
8,100.113,rs7837249,1.203  
8,100.352,rs4735337,1.219  
8,100.412,rs2599723,1.218  
8,100.496,rs10087402,1.226  
8,100.500,rs11781447,1.232  
8,100.504,rs4590408,1.238  
8,100.547,rs1470769,1.300  
8,100.623,rs7002762,1.185  
8,100.630,rs998980,1.181  
8,100.644,rs2514565,1.194  
8,100.660,rs730820,1.192  
8,100.663,rs894153,1.191  
8,100.729,rs1982872,1.170  
8,100.758,rs16893808,1.159  
8,100.792,rs4735360,1.145  
8,100.882,rs13268209,1.163  
8,100.909,rs2087791,1.176  
8,100.922,rs7824060,1.185  
8,101.026,rs1566516,1.194  
8,101.037,rs904924,1.136  
8,101.046,rs1472560,1.106  
8,101.061,rs3105001,1.088  
8,101.063,rs7011044,1.086  
8,101.090,rs3104992,0.981  
8,101.117,rs3104966,0.913  
8,101.201,rs895047,0.835  
8,101.231,rs7013599,0.807  
8,101.252,rs3099088,0.821  
8,101.256,rs3102484,0.825  
8,101.263,rs13280459,0.791  
8,101.303,rs6471558,0.855  
8,101.308,rs3102477,0.814  
8,101.314,rs3134497,0.824  
8,101.342,rs4263730,0.829  
8,101.369,rs3099096,0.822  
8,101.387,rs2873955,0.816  
8,101.411,rs16918205,0.793  
8,101.412,rs7007997,0.794  
8,101.424,rs550254,0.797  
8,101.442,rs1994222,0.804  
8,101.451,rs17768143,0.789  
8,101.505,rs10100514,0.746  
8,101.544,rs893222,0.724  
8,101.593,rs542253,0.715  
8,101.632,rs2255182,0.709  
8,101.643,rs6986442,0.705  
8,101.669,rs6985783,0.697

8,101.710,rs3808386,0.700  
8,101.749,rs2643341,0.707  
8,101.785,rs7013150,0.713  
8,101.806,rs10504962,0.724  
8,101.971,rs1348563,0.749  
8,101.979,rs12056723,0.750  
8,101.983,rs2439518,0.751  
8,102.010,rs7003874,0.746  
8,102.133,rs10955078,0.749  
8,102.151,rs750341,0.751  
8,102.179,rs7813101,0.760  
8,102.456,rs2319936,0.836  
8,102.773,rs2513361,0.992  
8,102.820,rs10504970,1.053  
8,102.829,rs2436051,1.056  
8,102.864,rs1155199,1.088  
8,102.929,rs12549505,1.115  
8,102.947,rs16895344,1.112  
8,102.948,rs7831704,1.112  
8,103.061,rs2635143,1.155  
8,103.105,rs11786542,1.177  
8,103.234,rs2448166,1.236  
8,103.240,rs663366,1.237  
8,103.258,rs499177,1.234  
8,103.262,rs6995779,1.234  
8,103.276,rs10808356,1.230  
8,103.405,rs7015322,1.158  
8,103.646,rs2513980,0.883  
8,103.752,rs2449535,0.792  
8,103.762,rs2512073,0.788  
8,103.775,rs7017753,0.784  
8,103.833,rs7815790,0.816  
8,103.876,rs2444907,0.789  
8,103.915,rs897189,0.752  
8,103.975,rs10098159,0.675  
8,103.991,rs2444895,0.672  
8,104.025,rs2255464,0.657  
8,104.085,rs2045806,0.648  
8,104.090,rs2514335,0.647  
8,104.098,rs6998768,0.663  
8,104.104,rs2306129,0.671  
8,104.125,rs2447500,0.675  
8,104.150,rs4735529,0.684  
8,104.188,rs16896695,0.710  
8,104.197,rs2514342,0.717  
8,104.224,rs736191,0.741  
8,104.281,rs7812348,0.833  
8,104.312,rs7831552,0.850  
8,104.314,rs4565432,0.800  
8,104.321,rs16896950,0.799  
8,104.323,rs10093553,0.795  
8,104.343,rs3802197,0.778  
8,104.463,rs10096329,0.789  
8,104.990,rs1449789,0.689  
8,105.095,rs11779445,0.701  
8,105.216,rs7015060,0.699  
8,105.228,rs3019086,0.698  
8,105.233,rs2979002,0.699  
8,105.249,rs2000479,0.700  
8,105.336,rs2154637,0.701  
8,105.513,rs4734459,0.757

8,105.521,rs7826305,0.759  
8,105.564,rs719870,0.763  
8,105.662,rs2000480,0.769  
8,105.799,rs16898600,0.764  
8,105.869,rs2469666,0.760  
8,106.012,rs3115892,0.728  
8,106.141,rs1693543,0.716  
8,106.304,rs2978107,0.704  
8,106.568,rs3105453,0.683  
8,106.647,rs7009643,0.664  
8,106.681,rs2135121,0.666  
8,106.805,rs13254653,0.614  
8,106.990,rs4002957,0.550  
8,107.009,rs12335167,0.507  
8,107.049,rs1026228,0.413  
8,107.070,rs7814838,0.397  
8,107.236,rs3019260,0.274  
8,107.250,rs6468757,0.271  
8,107.358,rs166995,0.244  
8,107.385,rs4734517,0.203  
8,107.425,rs869831,0.198  
8,107.455,rs2053741,0.212  
8,107.486,rs2004474,0.199  
8,107.712,rs746920,0.200  
8,107.718,rs1529605,0.200  
8,107.778,rs668179,0.194  
8,107.840,rs10505007,0.178  
8,108.018,rs1264477,0.227  
8,108.109,rs7005727,0.239  
8,108.112,rs474949,0.249  
8,108.135,rs539674,0.256  
8,108.144,rs508148,0.261  
8,108.147,rs2509765,0.263  
8,108.221,rs471757,0.288  
8,108.266,rs17476242,0.264  
8,108.279,rs666026,0.294  
8,108.320,rs523352,0.298  
8,108.388,rs6468782,0.302  
8,108.565,rs1111887,0.343  
8,108.829,rs10105774,0.403  
8,108.999,rs16868739,0.387  
8,109.103,rs718262,0.377  
8,109.202,rs16868879,0.365  
8,109.215,rs13248449,0.363  
8,109.266,rs6991144,0.346  
8,109.277,rs1573312,0.342  
8,109.283,rs1269701,0.342  
8,109.361,rs556388,0.354  
8,109.401,rs7833656,0.349  
8,109.426,rs6468813,0.342  
8,109.521,rs2067029,0.288  
8,109.526,rs1265122,0.278  
8,109.537,rs17509019,0.269  
8,109.545,rs1265138,0.261  
8,109.547,rs10505018,0.259  
8,109.638,rs2853229,0.232  
8,109.698,rs2978432,0.234  
8,109.759,rs16869360,0.236  
8,110.103,rs7836225,0.246  
8,110.204,rs7007146,0.209  
8,110.231,rs1347322,0.208

8,110.248,rs2436908,0.202  
8,110.258,rs16869559,0.199  
8,110.278,rs4734641,0.192  
8,110.283,rs2436893,0.189  
8,110.296,rs13263248,0.186  
8,110.315,rs2436916,0.180  
8,110.410,rs1978752,0.170  
8,110.439,rs6981411,0.164  
8,110.473,rs2099408,0.163  
8,110.497,rs9642980,0.149  
8,110.515,rs2513927,0.132  
8,110.546,rs1574480,0.124  
8,110.551,rs2511688,0.122  
8,110.559,rs2513941,0.118  
8,110.610,rs2513896,0.092  
8,110.637,rs4734668,0.074  
8,110.654,rs2513905,0.068  
8,110.694,rs10112564,0.056  
8,110.740,rs3808542,0.048  
8,110.849,rs2458285,0.045  
8,110.859,rs2460221,0.043  
8,110.885,rs525817,0.042  
8,111.020,rs2454039,0.052  
8,111.038,rs979671,0.054  
8,111.043,rs2047377,0.055  
8,111.044,rs16870112,0.051  
8,111.048,rs1497455,0.043  
8,111.070,rs1473541,0.054  
8,111.105,rs6468861,0.052  
8,111.115,rs7843452,0.052  
8,111.290,rs16870322,0.050  
8,111.449,rs3098218,0.047  
8,111.485,rs13439770,0.046  
8,112.018,rs10091132,0.037  
8,112.129,rs6992883,0.032  
8,112.137,rs2458413,0.032  
8,112.146,rs2853151,0.032  
8,112.152,rs2853160,0.032  
8,112.161,rs2669429,0.031  
8,112.212,rs987474,0.023  
8,112.225,rs1992214,0.022  
8,112.251,rs2085769,0.028  
8,112.275,rs284486,0.030  
8,112.301,rs6991677,0.033  
8,112.371,rs16872270,0.040  
8,112.391,rs2045672,0.043  
8,112.402,rs285802,0.041  
8,112.502,rs1903335,0.031  
8,112.541,rs6468994,0.033  
8,112.615,rs2929062,0.037  
8,112.672,rs7009208,0.050  
8,112.679,rs2622637,0.052  
8,112.683,rs302953,0.056  
8,112.686,rs302964,0.058  
8,112.709,rs1037306,0.066  
8,112.733,rs7015353,0.075  
8,112.770,rs2218279,0.087  
8,112.779,rs4734889,0.089  
8,112.781,rs10104574,0.090  
8,112.790,rs1442333,0.091  
8,112.794,rs6980689,0.092

8,112.830,rs10505085,0.108  
8,112.877,rs11996743,0.131  
8,113.031,rs1366963,0.124  
8,113.111,rs1503573,0.104  
8,113.151,rs7836368,0.116  
8,113.156,rs1954755,0.117  
8,113.157,rs2022979,0.118  
8,113.202,rs11990584,0.149  
8,113.230,rs7813598,0.156  
8,113.255,rs1453212,0.151  
8,113.265,rs3110776,0.151  
8,113.384,rs2449837,0.147  
8,113.397,rs16875176,0.147  
8,113.443,rs2447243,0.163  
8,113.454,rs1381485,0.166  
8,113.466,rs16875446,0.158  
8,113.527,rs2226405,0.121  
8,113.570,rs9643029,0.100  
8,113.674,rs1347183,0.096  
8,113.679,rs1433176,0.096  
8,113.766,rs13257142,0.090  
8,113.784,rs6469117,0.090  
8,113.872,rs10505110,0.102  
8,113.875,rs16876511,0.102  
8,113.879,rs281747,0.102  
8,113.887,rs1494971,0.108  
8,113.906,rs7006253,0.125  
8,113.919,rs4734156,0.130  
8,113.925,rs1469918,0.132  
8,113.982,rs7001159,0.170  
8,114.002,rs16892437,0.184  
8,114.009,rs2348081,0.189  
8,114.023,rs1299342,0.192  
8,114.040,rs12543507,0.197  
8,114.056,rs10092441,0.203  
8,114.081,rs1389976,0.210  
8,114.146,rs601558,0.198  
8,114.213,rs4735036,0.185  
8,114.390,rs2298605,0.149  
8,114.462,rs1375021,0.165  
8,114.701,rs2569201,0.252  
8,114.723,rs1874679,0.250  
8,114.739,rs1391201,0.246  
8,114.754,rs3019343,0.204  
8,114.781,rs3019359,0.163  
8,114.817,rs11995185,0.163  
8,115.077,rs4129682,0.147  
8,115.108,rs4644208,0.144  
8,115.435,rs10102228,0.074  
8,115.445,rs7463805,0.062  
8,115.449,rs1601181,0.044  
8,115.470,rs7813186,0.041  
8,115.490,rs10107566,0.052  
8,115.500,rs1605128,0.049  
8,115.522,rs996249,0.044  
8,115.523,rs16880318,0.044  
8,115.552,rs4147310,0.043  
8,115.581,rs2948998,0.038  
8,115.592,rs7832047,0.039  
8,115.677,rs1587014,0.051  
8,115.782,rs16881536,0.052

8,116.009,rs1573937,0.054  
8,116.459,rs1026490,0.052  
8,116.530,rs13270310,0.059  
8,116.545,rs10505203,0.060  
8,116.550,rs1513520,0.061  
8,116.552,rs16884721,0.061  
8,116.663,rs6986020,0.077  
8,116.671,rs2044999,0.075  
8,116.679,rs11998298,0.080  
8,116.708,rs7827567,0.098  
8,116.712,rs966210,0.101  
8,116.746,rs7825514,0.106  
8,116.797,rs11988087,0.109  
8,116.919,rs13276268,0.118  
8,116.955,rs7000026,0.118  
8,117.043,rs7004742,0.116  
8,117.044,rs10086373,0.115  
8,117.077,rs10112994,0.107  
8,117.124,rs2036014,0.093  
8,117.135,rs16886947,0.113  
8,117.156,rs7836816,0.107  
8,117.177,rs777831,0.110  
8,117.182,rs16887197,0.111  
8,117.215,rs7833220,0.130  
8,117.227,rs7821862,0.129  
8,117.246,rs800899,0.132  
8,117.653,rs9297548,0.161  
8,117.835,rs17662374,0.134  
8,117.879,rs10505280,0.133  
8,117.924,rs8181015,0.131  
8,118.005,rs13439023,0.125  
8,118.072,rs13270180,0.117  
8,118.089,rs13278681,0.114  
8,118.185,rs6469650,0.121  
8,118.334,rs4876679,0.169  
8,118.386,rs6981342,0.145  
8,118.426,rs2921787,0.137  
8,118.477,rs1584220,0.126  
8,118.505,rs2921722,0.121  
8,118.702,rs2466293,0.118  
8,118.706,rs2466291,0.118  
8,118.747,rs17813547,0.150  
8,118.759,rs1793733,0.161  
8,118.787,rs1499439,0.168  
8,118.798,rs1793709,0.178  
8,118.808,rs1793703,0.202  
8,118.818,rs13277475,0.204  
8,118.858,rs11778621,0.204  
8,118.861,rs7819010,0.204  
8,118.868,rs3018441,0.209  
8,118.912,rs11994257,0.198  
8,118.923,rs732095,0.202  
8,118.957,rs3134388,0.190  
8,118.958,rs16890122,0.190  
8,118.980,rs7836738,0.204  
8,118.984,rs10113582,0.205  
8,119.017,rs13275942,0.236  
8,119.032,rs11562822,0.209  
8,119.057,rs11562698,0.173  
8,119.058,rs9649944,0.177  
8,119.064,rs2451157,0.187

8,119.065,rs11562721,0.187  
8,119.068,rs6983199,0.186  
8,119.080,rs4147528,0.176  
8,119.094,rs7832658,0.177  
8,119.156,rs2450219,0.175  
8,119.218,rs16890925,0.129  
8,119.223,rs2515062,0.125  
8,119.232,rs7832475,0.123  
8,119.253,rs12675551,0.121  
8,119.334,rs4876852,0.127  
8,119.345,rs12548521,0.128  
8,119.369,rs3936020,0.147  
8,119.373,rs10505343,0.147  
8,119.378,rs1829605,0.150  
8,119.421,rs2460968,0.208  
8,119.434,rs1521154,0.212  
8,119.476,rs7459445,0.215  
8,119.479,rs13438904,0.215  
8,119.517,rs10104977,0.208  
8,119.548,rs16891419,0.217  
8,119.746,rs1905786,0.274  
8,119.760,rs3102735,0.247  
8,119.859,rs16891916,0.236  
8,120.006,rs6469818,0.220  
8,120.015,rs9297594,0.239  
8,120.148,rs972393,0.230  
8,120.161,rs2927021,0.229  
8,120.229,rs11538929,0.234  
8,120.369,rs2305129,0.250  
8,120.466,rs6986529,0.260  
8,120.746,rs7843326,0.283  
8,120.996,rs6469890,0.299  
8,121.087,rs4871830,0.293  
8,121.184,rs7820004,0.287  
8,121.337,rs6989074,0.273  
8,121.377,rs2305607,0.300  
8,121.381,rs10111291,0.301  
8,121.384,rs7813088,0.302  
8,121.454,rs2034843,0.287  
8,121.620,rs11784372,0.336  
8,121.626,rs12155569,0.338  
8,121.653,rs3922897,0.337  
8,121.732,rs13258818,0.378  
8,121.771,rs7818703,0.403  
8,121.799,rs7841636,0.415  
8,121.857,rs10108016,0.435  
8,122.004,rs6990987,0.528  
8,122.012,rs10105297,0.529  
8,122.026,rs16894450,0.554  
8,122.044,rs7824584,0.579  
8,122.191,rs1275461,0.546  
8,122.371,rs7843884,0.438  
8,122.402,rs975037,0.439  
8,122.424,rs6415475,0.439  
8,122.557,rs1542682,0.408  
8,122.572,rs11986236,0.406  
8,122.641,rs1384184,0.416  
8,122.692,rs10089677,0.412  
8,122.719,rs1008786,0.413  
8,122.737,rs6982790,0.415  
8,122.825,rs279640,0.400



8,122.838,rs1030980,0.402  
8,122.960,rs1980018,0.476  
8,122.992,rs10282837,0.480  
8,122.995,rs6989617,0.479  
8,123.025,rs6651164,0.476  
8,123.074,rs16896565,0.468  
8,123.695,rs4492387,0.363  
8,123.742,rs16896983,0.359  
8,123.809,rs4397408,0.360  
8,123.902,rs7003395,0.360  
8,124.091,rs6990139,0.396  
8,124.140,rs4518674,0.354  
8,124.253,rs10505421,0.345  
8,124.272,rs4242336,0.346  
8,124.275,rs4368984,0.346  
8,124.280,rs7005211,0.347  
8,124.339,rs10091964,0.336  
8,124.393,rs12547950,0.333  
8,124.405,rs4871293,0.329  
8,124.432,rs2140330,0.323  
8,124.472,rs7836045,0.332  
8,124.489,rs876742,0.321  
8,124.526,rs7822857,0.317  
8,124.547,rs4291275,0.316  
8,124.592,rs6980880,0.398  
8,124.608,rs7009772,0.368  
8,124.617,rs11777048,0.372  
8,124.684,rs10505427,0.387  
8,124.847,rs13273011,0.377  
8,125.059,rs7002043,0.386  
8,125.077,rs7012131,0.385  
8,125.255,rs11776799,0.393  
8,125.455,rs4871323,0.481  
8,125.721,rs7812750,0.577  
8,125.784,rs4870831,0.632  
8,125.826,rs3802266,0.628  
8,125.895,rs12549382,0.635  
8,125.899,rs7812,0.636  
8,126.077,rs4871351,0.689  
8,126.085,rs13252935,0.691  
8,126.154,rs16898060,0.687  
8,126.298,rs13248008,0.660  
8,126.333,rs1713731,0.650  
8,126.478,rs16898247,0.612  
8,126.682,rs3824252,0.561  
8,126.726,rs12548263,0.541  
8,126.759,rs10089389,0.527  
8,126.775,rs2294088,0.521  
8,126.779,rs7000759,0.568  
8,126.808,rs2294090,0.576  
8,126.880,rs2385296,0.590  
8,126.883,rs10088524,0.543  
8,126.890,rs16898594,0.550  
8,126.934,rs6470161,0.597  
8,126.991,rs10956139,0.585  
8,127.051,rs10429365,0.555  
8,127.064,rs4242345,0.553  
8,127.099,rs1080109,0.615  
8,127.106,rs17257150,0.617  
8,127.111,rs11774189,0.613  
8,127.112,rs16898757,0.612

8,127.167,rs10956146,0.571  
8,127.243,rs2163534,0.610  
8,127.307,rs2001966,0.652  
8,127.321,rs9792207,0.667  
8,127.356,rs6470190,0.776  
8,127.364,rs4870870,0.898  
8,127.365,rs6470192,0.906  
8,127.485,rs12541518,0.881  
8,127.512,rs7842762,0.857  
8,127.515,rs4871440,0.857  
8,127.637,rs4301439,0.836  
8,127.646,rs7844981,0.844  
8,127.796,rs4870888,0.951  
8,127.868,rs4413755,0.944  
8,127.977,rs7818198,0.901  
8,128.023,rs4242365,0.894  
8,128.103,rs4457311,0.906  
8,128.118,rs10755924,0.853  
8,128.206,rs9886564,0.847  
8,128.371,rs4620270,0.886  
8,128.416,rs3812475,0.909  
8,128.660,rs4871506,1.007  
8,128.722,rs4871518,0.979  
8,128.768,rs4871529,1.025  
8,128.778,rs7813190,1.036  
8,128.796,rs4870916,1.035  
8,128.806,rs7831518,1.021  
8,128.833,rs2116081,0.959  
8,128.838,rs2382993,0.896  
8,128.849,rs2163372,0.938  
8,128.933,rs6993864,0.921  
8,128.936,rs7459793,0.918  
8,128.971,rs7011543,0.922  
8,129.043,rs4871549,0.926  
8,129.044,rs4871550,0.926  
8,129.178,rs6470302,0.855  
8,129.180,rs7016748,0.854  
8,129.293,rs2590665,1.037  
8,129.301,rs1834716,1.040  
8,129.316,rs2590673,1.050  
8,129.325,rs12545272,1.054  
8,129.330,rs7018326,1.057  
8,129.380,rs10099164,1.155  
8,129.402,rs4332153,1.218  
8,129.417,rs2385107,1.298  
8,129.422,rs2980872,1.309  
8,129.440,rs7837158,1.344  
8,129.457,rs10956245,1.375  
8,129.503,rs4518686,1.458  
8,129.599,rs12676771,1.575  
8,129.607,rs7824301,1.582  
8,129.716,rs1454616,1.746  
8,129.771,rs2124036,1.715  
8,129.801,rs12678366,1.718  
8,129.841,rs2054068,1.628  
8,129.943,rs3087723,1.614  
8,129.962,rs7008332,1.674  
8,129.992,rs7003960,1.787  
8,130.067,rs16900891,1.764  
8,130.220,rs2087688,1.837  
8,130.248,rs1491467,1.756

8,130.250,rs1491466,1.651  
8,130.317,rs6470399,1.565  
8,130.319,rs16901028,1.604  
8,130.325,rs1155228,1.713  
8,130.380,rs1552706,1.683  
8,130.579,rs6999393,1.602  
8,130.789,rs926127,1.652  
8,131.161,rs2467616,1.708  
8,131.267,rs16901313,1.725  
8,132.009,rs2293851,1.891  
8,132.278,rs4870976,1.953  
8,132.565,rs7012323,2.027  
8,132.625,rs2385694,1.983  
8,132.746,rs10481080,2.101  
8,132.766,rs7461025,2.117  
8,132.781,rs2385686,2.123  
8,132.792,rs4871724,2.125  
8,132.897,rs6470458,2.108  
8,132.952,rs2011629,2.183  
8,133.016,rs1906880,2.199  
8,133.247,rs10113595,2.250  
8,133.414,rs756100,2.272  
8,133.454,rs4871750,2.290  
8,133.903,rs961017,2.353  
8,133.947,rs2392729,2.445  
8,133.959,rs6993569,2.449  
8,134.032,rs16901966,2.467  
8,134.079,rs1456305,2.489  
8,134.248,rs2466024,2.377  
8,134.318,rs9643217,2.408  
8,134.361,rs10087719,2.449  
8,134.428,rs283741,2.580  
8,134.499,rs2122835,2.645  
8,134.578,rs283718,2.720  
8,134.588,rs283721,2.743  
8,134.685,rs672888,2.812  
8,134.810,rs731900,2.880  
8,134.846,rs7844673,2.972  
8,134.873,rs6983267,3.058  
8,134.996,rs7012462,3.248  
8,134.999,rs4871791,3.277  
8,135.034,rs7830412,3.565  
8,135.037,rs1447293,3.583  
8,135.077,rs9297758,3.608  
8,135.151,rs4871808,3.675  
8,135.249,rs13258742,3.738  
8,135.253,rs4407842,3.744  
8,135.330,rs4733739,3.644  
8,135.476,rs4314620,3.739  
8,135.512,rs6989963,3.802  
8,135.516,rs4130120,3.815  
8,135.564,rs4733616,3.951  
8,135.571,rs4562278,3.961  
8,135.632,rs4593503,3.889  
8,135.731,rs7845292,3.660  
8,135.742,rs7840975,3.655  
8,135.756,rs6470563,3.665  
8,135.796,rs9642880,3.685  
8,135.887,rs10505505,3.734  
8,136.038,rs6981913,3.790  
8,136.217,rs7841347,3.677

8,136.415,rs4339604,3.627  
8,136.516,rs6470588,3.568  
8,136.836,rs13274181,3.453  
8,136.897,rs752427,3.427  
8,137.033,rs10087240,3.380  
8,137.141,rs2173537,3.412  
8,137.191,rs2648868,3.441  
8,137.290,rs6470602,3.489  
8,137.311,rs2648902,3.513  
8,137.331,rs4733593,3.518  
8,137.764,rs16902760,3.432  
8,137.774,rs4733601,3.427  
8,137.778,rs13439100,3.425  
8,137.781,rs16902768,3.423  
8,137.831,rs2049824,3.466  
8,137.870,rs7820941,3.587  
8,137.879,rs4733859,3.614  
8,138.117,rs6998301,3.778  
8,138.155,rs10505517,3.716  
8,138.165,rs7831607,3.693  
8,138.167,rs16903010,3.688  
8,138.204,rs1516982,3.727  
8,138.343,rs4236736,3.697  
8,138.384,rs1432019,3.695  
8,138.478,rs4733653,3.579  
8,138.595,rs1470206,3.637  
8,138.774,rs7823113,3.715  
8,138.878,rs4480081,3.776  
8,138.948,rs6990827,3.859  
8,138.954,rs10098689,3.983  
8,139.011,rs2217589,3.964  
8,139.029,rs7815330,3.920  
8,139.164,rs10092988,4.006  
8,139.232,rs4397371,4.027  
8,139.233,rs16904143,4.027  
8,139.234,rs7007679,4.026  
8,139.238,rs17274130,3.891  
8,139.474,rs1600934,3.918  
8,139.483,rs4733741,3.919  
8,139.585,rs1825225,3.830  
8,139.723,rs1340022,3.960  
8,139.752,rs11775398,4.008  
8,139.768,rs1001812,3.996  
8,139.771,rs11781952,4.021  
8,139.772,rs9297810,4.028  
8,139.776,rs10505550,4.061  
8,139.777,rs7015138,4.068  
8,139.782,rs6983862,4.071  
8,139.783,rs6987139,4.072  
8,139.789,rs2959319,4.076  
8,139.815,rs10505551,4.086  
8,139.892,rs10098680,4.097  
8,139.956,rs4460390,4.168  
8,139.971,rs6986527,4.183  
8,140.092,rs9649963,4.487  
8,140.094,rs6470838,4.490  
8,140.232,rs10217074,4.466  
8,140.300,rs1509848,4.286  
8,140.303,rs6470848,4.277  
8,140.304,rs2572862,4.277  
8,140.401,rs17226545,4.234

8,140.525,rs448852,4.216  
8,140.595,rs1369450,4.248  
8,140.801,rs12156272,4.361  
8,140.931,rs1023095,4.524  
8,140.969,rs10505568,4.537  
8,141.164,rs10101663,4.420  
8,141.170,rs16904418,4.416  
8,141.181,rs4587308,4.403  
8,141.338,rs7017572,4.211  
8,141.363,rs4596632,4.168  
8,141.409,rs4371986,4.068  
8,141.435,rs1449471,3.992  
8,141.522,rs273403,3.890  
8,141.529,rs10505571,3.875  
8,141.533,rs10103391,3.866  
8,141.548,rs1605438,3.801  
8,141.577,rs457941,3.649  
8,141.634,rs277037,3.258  
8,141.674,rs1420484,3.223  
8,141.682,rs993718,3.215  
8,141.734,rs491614,3.159  
8,141.740,rs587639,3.155  
8,141.810,rs6980944,3.134  
8,141.889,rs1399362,3.103  
8,141.914,rs10100214,3.089  
8,141.968,rs10956624,3.070  
8,141.985,rs16904558,3.071  
8,142.071,rs2102103,3.049  
8,142.094,rs3802262,3.036  
8,142.098,rs3739280,3.034  
8,142.110,rs2280851,3.029  
8,142.139,rs2469643,3.010  
8,142.178,rs1864772,2.935  
8,142.601,rs9643288,2.639  
8,142.754,rs1025435,2.498  
8,142.903,rs4736413,2.322  
8,142.908,rs16904657,2.322  
8,142.975,rs2673567,2.355  
8,143.022,rs2673593,2.273  
8,143.034,rs1878016,2.344  
8,143.078,rs10100851,2.657  
8,143.095,rs2673579,2.724  
8,143.128,rs9297852,2.761  
8,143.157,rs13253244,2.875  
8,143.500,rs853326,3.076  
8,143.521,rs853308,3.162  
8,143.574,rs1879992,2.936  
8,143.629,rs3758113,2.793  
8,143.807,rs2252696,2.709  
8,144.779,rs4410884,2.436  
8,144.781,rs10956695,2.437  
8,144.829,rs4330674,2.661  
8,144.866,rs2929975,2.639  
8,144.877,rs2272646,2.644  
8,144.895,rs2233334,2.650  
8,144.903,rs7839335,2.647  
8,144.970,rs6982249,2.601  
8,145.024,rs11782647,2.540  
8,145.143,rs2737437,2.418  
8,145.161,rs6471124,2.415  
8,145.173,rs13274799,2.456

8,145.197,rs2142306,2.378  
8,145.215,rs16904929,2.340  
8,145.222,rs9643299,2.309  
8,145.252,rs3739256,2.268  
8,145.334,rs2978043,2.272  
8,145.480,rs7829120,2.193  
8,145.559,rs7820431,2.463  
8,145.638,rs1554324,2.476  
8,145.845,rs13264573,2.459  
8,146.435,rs2922446,2.347  
8,146.487,rs1610131,2.491  
8,146.489,rs2922485,2.496  
8,146.490,rs11780515,2.500  
8,146.497,rs2922464,2.527  
8,146.502,rs7814358,2.557  
8,146.504,rs4563869,2.576  
8,146.513,rs4897689,2.712  
8,146.514,rs924768,2.718  
8,146.519,rs4897697,2.698  
8,146.529,rs2896730,2.670  
8,146.532,rs1587768,2.633  
8,146.538,rs12676561,2.580  
8,146.559,rs1870126,2.593  
8,146.567,rs16905081,2.602  
8,146.584,rs6471199,2.573  
8,146.591,rs4897704,2.564  
8,146.593,rs1596953,2.522  
8,146.598,rs10098827,2.506  
8,146.603,rs10100237,2.462  
8,146.616,rs4897638,2.460  
8,146.625,rs7844624,2.412  
8,146.639,rs4076195,2.401  
8,146.647,rs6578149,2.428  
8,146.666,rs11990335,2.525  
8,146.669,rs12541381,2.539  
8,146.670,rs11166643,2.538  
8,146.673,rs17778003,2.536  
8,146.832,rs4388416,2.436  
8,146.930,rs1986890,2.437  
8,147.008,rs13275738,2.435  
8,147.017,rs7828209,2.515  
8,147.215,rs733122,2.584  
8,147.303,rs1000394,2.697  
8,147.355,rs4243894,2.750  
8,147.421,rs7462577,2.774  
8,147.434,rs7464953,2.773  
8,147.475,rs3925094,2.679  
8,147.481,rs11166907,2.676  
8,147.488,rs4909851,2.716  
8,147.538,rs6578047,2.813  
8,147.565,rs10113126,2.814  
8,147.571,rs6578068,2.799  
8,147.613,rs1383453,2.670  
8,147.788,rs2067766,2.718  
8,147.819,rs11167077,2.736  
8,147.831,rs10156288,2.793  
8,147.844,rs16905302,2.849  
8,147.882,rs7827633,2.813  
8,147.889,rs4909472,2.806  
8,147.924,rs2199922,2.798  
8,148.018,rs10464988,2.780

8,148.638,rs3935903,2.762  
8,148.643,rs3936125,2.689  
8,148.771,rs6577669,2.810  
8,148.810,rs11784836,2.812  
8,148.939,rs7840440,2.886  
8,149.065,rs6577727,2.937  
8,149.360,rs1371746,2.822  
8,149.398,rs1866698,2.720  
8,149.401,rs2255522,2.711  
8,149.475,rs7837030,2.717  
8,149.852,rs305230,2.621  
8,150.125,rs2582475,2.515  
8,150.129,rs2253765,2.590  
8,150.161,rs7842212,2.559  
8,150.228,rs1499446,2.566  
8,150.245,rs1499451,2.522  
8,150.321,rs6988964,2.632  
8,150.369,rs2978607,2.691  
8,150.382,rs4909633,2.698  
8,150.386,rs7012808,2.700  
8,150.397,rs4909356,2.699  
8,150.439,rs9324442,2.701  
8,150.524,rs4410940,2.703  
8,150.602,rs7820415,2.630  
8,150.650,rs13279979,2.582  
8,150.858,rs964944,2.498  
8,150.875,rs1399173,2.491  
8,151.138,rs17634990,2.423  
8,151.171,rs4620319,2.414  
8,151.314,rs4495466,2.472  
8,151.450,rs10112884,2.374  
8,151.477,rs4548215,2.364  
8,151.495,rs11787188,2.316  
8,151.533,rs7845645,2.389  
8,151.613,rs7386095,2.480  
8,151.706,rs2668096,2.498  
8,151.741,rs7003232,2.508  
8,151.748,rs2668109,2.510  
8,151.889,rs10103652,2.376  
8,151.962,rs11166774,2.158  
8,152.014,rs1325058,2.170  
8,152.042,rs10096264,2.165  
8,152.064,rs11786500,2.144  
8,152.090,rs7815520,2.119  
8,152.136,rs16908252,2.072  
8,152.137,rs7463648,2.072  
8,152.158,rs7828715,2.027  
8,152.226,rs7824771,1.914  
8,152.249,rs733518,1.886  
8,152.261,rs876369,1.862  
8,152.308,rs16908616,1.738  
8,152.311,rs6989502,1.728  
8,152.318,rs6577893,1.711  
8,152.333,rs16908658,1.692  
8,152.337,rs6577898,1.577  
8,152.349,rs872501,1.580  
8,152.350,rs4243888,1.574  
8,152.354,rs6577900,1.653  
8,152.366,rs1996030,1.660  
8,152.415,rs12545802,1.614  
8,152.426,rs1398297,1.581

8,152.442,rs7831210,1.534  
8,152.537,rs1512394,1.440  
8,152.703,rs2056277,1.356  
8,152.704,rs7837068,1.356  
8,152.773,rs1519391,1.365  
8,152.851,rs985679,1.437  
8,152.917,rs16909189,1.468  
8,152.972,rs6577927,1.527  
8,153.114,rs4909806,1.497  
8,153.227,rs7017524,1.465  
8,153.268,rs7832390,1.451  
8,153.515,rs4909443,1.254  
8,153.725,rs11166844,1.181  
8,153.735,rs4736183,1.114  
8,153.842,rs1879051,1.049  
8,153.941,rs2318331,1.074  
8,153.948,rs9644504,1.081  
8,153.969,rs12675384,1.099  
8,153.987,rs11775756,1.108  
8,154.015,rs6998323,1.078  
8,154.018,rs12549200,1.021  
8,154.102,rs6986041,0.916  
8,154.121,rs2318349,0.890  
8,154.232,rs11166865,0.881  
8,154.346,rs951920,0.825  
8,154.449,rs1395310,0.823  
8,154.571,rs16910093,0.819  
8,154.601,rs10875434,0.816  
8,154.763,rs7460675,0.849  
8,154.941,rs11775898,0.873  
8,155.032,rs7814156,0.798  
8,155.038,rs12675641,0.810  
8,155.045,rs2873902,0.833  
8,155.056,rs10216876,0.872  
8,155.075,rs7820230,0.883  
8,155.135,rs2319093,0.803  
8,155.214,rs994770,0.767  
8,155.257,rs7845540,0.748  
8,155.361,rs2467180,0.814  
8,155.579,rs2455790,0.849  
8,155.637,rs10108546,0.849  
8,155.799,rs2468708,0.847  
8,155.951,rs2261824,0.821  
8,156.017,rs2542425,0.805  
8,156.088,rs3780051,0.793  
8,156.186,rs3780032,0.827  
8,156.207,rs16911238,0.824  
8,156.521,rs2242181,0.802  
8,156.634,rs2054313,0.796  
8,156.700,rs2010771,0.787  
8,156.924,rs732803,0.779  
8,157.127,rs6578061,0.760  
8,157.272,rs6988625,0.729  
8,157.407,rs7006969,0.821  
8,157.603,rs6578080,0.826  
8,157.684,rs7002644,0.839  
8,157.706,rs7017431,0.842  
8,157.761,rs4236871,0.845  
8,157.768,rs4736167,0.845  
8,157.897,rs1568605,0.775  
8,157.972,rs7839705,0.791



8,158.026,rs13256219,0.796  
8,158.236,rs12681305,0.805  
8,158.240,rs7841423,0.806  
8,158.303,rs4961282,0.846  
8,158.366,rs11780595,0.887  
8,158.439,rs11595,0.873  
8,158.480,rs2977469,0.851  
8,158.602,rs7009635,0.852  
8,158.898,rs11785444,0.861  
8,158.902,rs4961287,0.860  
8,159.672,rs12545416,0.667  
8,159.679,rs11167021,0.663  
8,159.749,rs306974,0.634  
8,159.793,rs306967,0.614  
8,159.875,rs11167023,0.612  
8,159.935,rs11785437,0.600  
8,160.047,rs372758,0.587  
8,160.084,rs307739,0.583  
8,160.197,rs7018178,0.594  
8,160.358,rs6999890,0.641  
8,160.370,rs11786212,0.643  
8,160.400,rs7818687,0.651  
8,160.621,rs6578177,0.709  
8,160.807,rs7014345,0.632  
8,160.848,rs2748423,0.654  
8,160.908,rs4907333,0.685  
8,160.920,rs4907374,0.687  
8,160.922,rs6578201,0.687  
8,160.966,rs1566080,0.690  
8,161.035,rs537845,0.724  
8,161.055,rs13252791,0.733  
8,161.081,rs11779803,0.742  
8,161.208,rs7006068,0.798  
8,161.327,rs903956,0.771  
8,161.330,rs7844529,0.772  
8,161.346,rs6982668,0.778  
8,161.387,rs10092983,0.792  
8,161.390,rs7820007,0.792  
8,161.623,rs11167091,0.672  
8,161.651,rs9694100,0.707  
8,161.711,rs9720781,0.646  
8,161.726,rs9324568,0.592  
8,161.823,rs7013384,0.545  
8,161.854,rs7012875,0.529  
8,161.917,rs6583640,0.484  
8,162.061,rs733225,0.541  
8,162.123,rs4917217,0.578  
8,162.152,rs12676273,0.553  
8,162.164,rs1492366,0.561  
8,162.265,rs4244246,0.634  
8,162.314,rs7386204,0.692  
8,162.351,rs6981017,0.667  
8,162.361,rs7835207,0.607  
8,162.400,rs3934930,0.538  
8,162.440,rs6583595,0.502  
8,162.713,rs11167137,0.497  
8,162.913,rs6991885,0.484  
8,162.967,rs13275839,0.483  
8,163.007,rs6583634,0.482  
8,163.039,rs4074758,0.474  
8,163.125,rs7846567,0.466

8,163.266,rs9324593,0.499  
8,163.379,rs3802232,0.531  
8,163.626,rs11988843,0.580  
8,163.649,rs11783855,0.583  
8,163.690,rs2717591,0.583  
8,163.886,rs7844961,0.520  
8,164.068,rs4270938,0.460  
8,164.096,rs10283236,0.448  
8,164.172,rs12675829,0.414  
8,164.238,rs4977114,0.419  
8,164.250,rs4602864,0.420  
8,164.336,rs4075410,0.443  
8,164.352,rs7834727,0.436  
8,164.404,rs11781387,0.432  
8,164.445,rs7388577,0.403  
8,164.447,rs4075205,0.401  
8,164.572,rs2467894,0.346  
8,164.580,rs10866910,0.365  
8,164.635,rs4873792,0.373  
8,164.637,rs879740,0.373  
8,164.688,rs4874137,0.411  
8,164.725,rs896945,0.406  
8,164.822,rs2045084,0.326  
8,164.850,rs4873815,0.306  
8,164.908,rs10100154,0.275  
8,165.000,rs4875060,0.240  
8,165.031,rs11779128,0.235  
8,165.054,rs4977189,0.239  
8,165.064,rs11136331,0.238  
8,165.071,rs7831595,0.212  
8,165.346,rs9720889,0.162  
8,165.602,rs7016335,0.093  
8,165.671,rs3735840,0.066  
8,165.702,rs10108150,0.054  
8,165.818,rs11988651,0.050  
8,165.970,rs2953854,0.047  
8,166.132,rs3808375,0.048  
8,166.158,rs2979109,0.048  
9,0.050,rs7028675,-0.002  
9,0.185,rs10815440,-0.002  
9,0.262,rs2361111,-0.002  
9,0.345,rs4740866,-0.001  
9,0.421,rs10815596,-0.000  
9,0.455,rs12005362,-0.000  
9,0.537,rs10815670,-0.000  
9,0.539,rs1853426,-0.000  
9,0.581,rs10815704,-0.000  
9,0.743,rs7029148,0.000  
9,0.808,rs7875857,0.001  
9,0.824,rs10977270,0.000  
9,0.849,rs16925374,0.000  
9,0.878,rs2057429,0.000  
9,0.958,rs10816063,0.000  
9,1.126,rs7871877,0.002  
9,1.160,rs7047346,0.003  
9,1.229,rs10756006,0.005  
9,1.280,rs2279988,0.007  
9,1.324,rs9140,0.007  
9,1.328,rs10809101,0.001  
9,1.369,rs17795247,0.001  
9,1.391,rs4497022,0.001

9,1.406,rs4741056,0.001  
9,1.434,rs1509186,0.002  
9,1.448,rs1355142,0.003  
9,1.521,rs10809367,0.009  
9,1.646,rs2375256,0.011  
9,1.660,rs10960072,0.011  
9,1.771,rs10809682,0.019  
9,1.800,rs10738265,0.021  
9,1.967,rs1415612,0.032  
9,2.053,rs16927344,0.037  
9,2.066,rs10809892,0.037  
9,2.082,rs7869745,0.027  
9,2.135,rs12345947,0.033  
9,2.179,rs1538721,0.034  
9,2.233,rs646785,0.021  
9,2.307,rs12341621,0.015  
9,2.410,rs880013,0.008  
9,2.412,rs876976,0.008  
9,2.452,rs7036822,0.007  
9,2.481,rs2210421,0.006  
9,2.557,rs7859959,0.013  
9,2.617,rs16930214,0.013  
9,2.630,rs10810330,0.013  
9,3.054,rs2181515,0.011  
9,3.099,rs1323235,0.011  
9,3.197,rs7038689,0.011  
9,3.264,rs6475120,0.010  
9,3.302,rs4297077,0.009  
9,3.453,rs3847228,0.008  
9,3.574,rs10810952,0.006  
9,3.707,rs4741619,0.001  
9,3.788,rs4551422,0.000  
9,3.890,rs7030343,0.004  
9,3.910,rs7857865,0.004  
9,4.029,rs10119055,0.029  
9,4.131,rs7862617,0.029  
9,4.152,rs3793482,0.031  
9,4.243,rs2066111,0.040  
9,4.348,rs1962292,0.041  
9,4.385,rs7866316,0.037  
9,4.426,rs13283799,0.023  
9,4.439,rs10811530,0.017  
9,4.475,rs17386332,0.014  
9,4.484,rs10965030,0.010  
9,4.491,rs3793504,0.003  
9,4.507,rs10491695,0.001  
9,4.592,rs10965167,0.003  
9,4.601,rs10965177,0.003  
9,4.685,rs10491703,0.001  
9,4.688,rs10491704,0.001  
9,4.718,rs4741657,0.000  
9,4.764,rs1555646,0.000  
9,4.821,rs7869041,0.000  
9,4.868,rs744216,0.000  
9,4.963,rs17473202,0.001  
9,5.076,rs2183810,0.002  
9,5.222,rs2376120,0.005  
9,5.257,rs7048743,0.004  
9,5.317,rs10757471,0.003  
9,5.329,rs10757474,0.004  
9,5.379,rs1331458,0.004

9,5.583,rs620949,0.006  
9,5.602,rs4741729,0.005  
9,5.638,rs1590979,0.005  
9,5.744,rs1454637,0.005  
9,5.814,rs1454626,0.006  
9,5.871,rs3780181,0.004  
9,5.894,rs6148,0.004  
9,5.950,rs1470943,0.005  
9,5.988,rs7870360,0.004  
9,6.018,rs10122587,0.004  
9,6.071,rs897165,0.003  
9,6.130,rs10967775,0.004  
9,6.169,rs10967908,0.006  
9,6.211,rs7854358,0.008  
9,6.219,rs10967974,0.008  
9,6.446,rs10116824,0.011  
9,6.475,rs12001239,0.008  
9,6.480,rs7026256,0.007  
9,6.515,rs10968653,0.005  
9,6.665,rs10813032,0.024  
9,6.746,rs4741798,0.032  
9,6.780,rs4543592,0.034  
9,6.847,rs2327717,0.030  
9,6.853,rs3847252,0.030  
9,6.899,rs7021672,0.029  
9,6.903,rs3843576,0.029  
9,6.980,rs1570286,0.034  
9,7.155,rs10511446,0.057  
9,7.226,rs2986676,0.058  
9,7.314,rs17659225,0.054  
9,7.497,rs7046581,0.053  
9,7.577,rs951777,0.052  
9,7.577,rs2488292,0.042  
9,7.592,rs1001389,0.036  
9,7.605,rs10814284,0.040  
9,7.685,rs1548299,0.038  
9,7.718,rs10511452,0.044  
9,7.725,rs10814428,0.046  
9,7.759,rs10511453,0.091  
9,7.767,rs7872019,0.096  
9,7.770,rs7871296,0.098  
9,7.798,rs10973251,0.096  
9,7.836,rs7868939,0.093  
9,7.873,rs7039314,0.076  
9,7.923,rs2380902,0.089  
9,7.934,rs2297324,0.091  
9,7.936,rs12376878,0.090  
9,7.939,rs12001442,0.091  
9,7.957,rs4612398,0.094  
9,7.962,rs12685627,0.094  
9,7.990,rs7867243,0.086  
9,7.994,rs6476722,0.085  
9,8.029,rs1869690,0.076  
9,8.097,rs10974235,0.075  
9,8.099,rs564618,0.069  
9,8.101,rs12238888,0.061  
9,8.101,rs11791772,0.051  
9,8.101,rs528938,0.048  
9,8.102,rs663542,0.059  
9,8.102,rs7045016,0.059  
9,8.102,rs12351382,0.060

9,8.102,rs657076,0.061  
9,8.106,rs515380,0.124  
9,8.106,rs501461,0.127  
9,8.109,rs10814835,0.126  
9,8.109,rs806031,0.118  
9,8.110,rs10814848,0.115  
9,9.017,rs10974343,0.128  
9,9.079,rs10758561,0.128  
9,9.093,rs10974362,0.128  
9,9.174,rs6476823,0.130  
9,9.192,rs13292114,0.130  
9,9.251,rs11999791,0.132  
9,9.257,rs911491,0.132  
9,9.402,rs10758590,0.128  
9,9.451,rs6476837,0.123  
9,9.495,rs10758594,0.118  
9,9.544,rs4740766,0.113  
9,9.559,rs10739044,0.112  
9,9.574,rs12336107,0.113  
9,9.604,rs10739046,0.112  
9,9.657,rs10758606,0.130  
9,9.670,rs10974470,0.134  
9,9.684,rs12378782,0.133  
9,9.895,rs2210105,0.135  
9,9.907,rs4741967,0.136  
9,10.015,rs10511457,0.148  
9,10.106,rs4741985,0.159  
9,10.478,rs10491733,0.222  
9,10.650,rs12351328,0.252  
9,10.709,rs7849913,0.262  
9,10.807,rs16921457,0.287  
9,10.807,rs10815016,0.287  
9,10.857,rs3780415,0.300  
9,10.946,rs3780412,0.307  
9,11.081,rs2771,0.341  
9,11.251,rs10974672,0.361  
9,11.315,rs10815051,0.366  
9,11.538,rs12685759,0.319  
9,11.579,rs1331191,0.310  
9,11.603,rs1048020,0.306  
9,11.747,rs378117,0.299  
9,11.839,rs385893,0.300  
9,11.858,rs420470,0.292  
9,11.959,rs4740801,0.268  
9,12.128,rs457417,0.251  
9,12.146,rs10974824,0.250  
9,12.154,rs10815099,0.258  
9,12.155,rs913259,0.258  
9,12.175,rs10815102,0.266  
9,12.230,rs1571221,0.253  
9,12.274,rs7870381,0.241  
9,12.549,rs10758677,0.226  
9,12.658,rs10975037,0.195  
9,12.676,rs10975041,0.193  
9,12.677,rs1407374,0.193  
9,12.727,rs1322220,0.194  
9,12.772,rs7027829,0.178  
9,12.799,rs1535453,0.180  
9,12.812,rs10491647,0.182  
9,12.832,rs822349,0.210  
9,12.854,rs10125854,0.219

9,12.855,rs2890658,0.219  
9,12.894,rs10975152,0.262  
9,12.916,rs16923201,0.267  
9,12.918,rs4237162,0.268  
9,12.951,rs7854413,0.241  
9,12.973,rs7025291,0.230  
9,12.973,rs7024586,0.230  
9,13.007,rs7037208,0.225  
9,13.127,rs10815274,0.268  
9,13.208,rs2797512,0.274  
9,13.268,rs1418742,0.278  
9,13.299,rs10975339,0.304  
9,13.299,rs7034210,0.304  
9,13.479,rs343494,0.288  
9,13.556,rs387149,0.304  
9,13.645,rs12551256,0.334  
9,13.881,rs524888,0.342  
9,13.979,rs4740848,0.365  
9,13.979,rs1929933,0.365  
9,13.993,rs7870809,0.359  
9,14.046,rs2118653,0.316  
9,14.082,rs10815461,0.322  
9,14.092,rs2918182,0.308  
9,14.102,rs7871969,0.296  
9,14.126,rs10739110,0.272  
9,14.214,rs4742263,0.294  
9,14.251,rs4740861,0.290  
9,14.290,rs4742269,0.292  
9,14.297,rs10118127,0.291  
9,14.455,rs6477122,0.289  
9,14.624,rs12342436,0.269  
9,14.720,rs702279,0.254  
9,14.785,rs1323398,0.277  
9,14.832,rs2792238,0.285  
9,14.937,rs10758821,0.307  
9,14.946,rs12554351,0.308  
9,14.947,rs16925141,0.308  
9,15.046,rs10976014,0.316  
9,15.157,rs10118608,0.323  
9,15.164,rs4742308,0.324  
9,15.312,rs2890741,0.337  
9,15.453,rs913588,0.378  
9,15.633,rs2820957,0.373  
9,15.718,rs12551734,0.355  
9,15.818,rs7034160,0.392  
9,15.938,rs12555938,0.433  
9,16.091,rs1926363,0.486  
9,16.103,rs1926359,0.489  
9,16.118,rs6477190,0.497  
9,16.120,rs6477191,0.503  
9,16.138,rs4742341,0.538  
9,16.167,rs943174,0.536  
9,16.211,rs1926410,0.540  
9,16.374,rs10124650,0.563  
9,16.415,rs10815617,0.569  
9,16.453,rs4329320,0.574  
9,16.468,rs4740890,0.576  
9,16.486,rs10511479,0.577  
9,16.554,rs2381635,0.590  
9,16.612,rs12376869,0.600  
9,16.614,rs4740897,0.600

9,16.670,rs4742380,0.597  
9,16.911,rs3124028,0.511  
9,17.190,rs9407382,0.783  
9,17.192,rs10758900,0.786  
9,17.200,rs4742408,0.857  
9,17.226,rs182753,0.850  
9,17.238,rs7035953,0.855  
9,17.251,rs10815682,0.990  
9,17.253,rs327754,0.999  
9,17.288,rs327759,1.067  
9,17.354,rs9299057,1.123  
9,17.551,rs4302898,1.103  
9,17.586,rs2890768,1.114  
9,17.609,rs1535480,1.122  
9,17.636,rs10815721,1.138  
9,17.668,rs1407467,1.090  
9,17.704,rs2025193,1.097  
9,17.865,rs10976758,1.124  
9,17.869,rs4742447,1.127  
9,17.923,rs10758936,1.167  
9,17.937,rs16927126,1.161  
9,18.022,rs13287364,1.122  
9,18.047,rs12237835,1.116  
9,18.099,rs7044355,1.116  
9,18.121,rs1538523,1.137  
9,18.179,rs1339287,1.226  
9,18.197,rs17550688,1.119  
9,18.197,rs7043322,1.117  
9,18.198,rs3842929,1.110  
9,18.232,rs10815806,1.154  
9,18.233,rs7048696,1.092  
9,18.237,rs10976889,1.033  
9,18.238,rs884540,1.032  
9,18.348,rs10114301,0.953  
9,18.363,rs1353983,0.949  
9,18.598,rs12348387,0.822  
9,18.601,rs4742502,0.820  
9,18.648,rs10977117,0.810  
9,18.652,rs1323588,0.810  
9,18.804,rs10977176,0.721  
9,18.928,rs12340105,0.702  
9,19.011,rs10758985,0.707  
9,19.238,rs1473822,0.695  
9,19.280,rs7038493,0.655  
9,19.349,rs9299072,0.589  
9,19.389,rs1550004,0.490  
9,19.424,rs10733549,0.503  
9,19.466,rs7048621,0.513  
9,19.519,rs751372,0.531  
9,19.527,rs10815977,0.537  
9,19.560,rs10759013,0.515  
9,19.567,rs17584499,0.519  
9,19.573,rs10815983,0.566  
9,19.601,rs2196066,0.545  
9,19.613,rs7856948,0.521  
9,19.647,rs10046838,0.459  
9,19.666,rs9644893,0.414  
9,19.786,rs12554851,0.335  
9,19.827,rs973117,0.308  
9,19.829,rs10816028,0.308  
9,19.835,rs12006331,0.308

9,19.883,rs540259,0.303  
9,19.893,rs368381,0.303  
9,19.917,rs324526,0.302  
9,19.924,rs324533,0.304  
9,19.955,rs324498,0.312  
9,20.031,rs472324,0.261  
9,20.113,rs10511521,0.304  
9,20.134,rs957155,0.315  
9,20.148,rs1999741,0.308  
9,20.219,rs1445213,0.290  
9,20.357,rs4568657,0.294  
9,20.394,rs7863177,0.288  
9,20.609,rs1855217,0.321  
9,20.639,rs2780078,0.325  
9,20.735,rs4342663,0.367  
9,20.775,rs1360593,0.379  
9,20.848,rs16929560,0.420  
9,20.892,rs4551426,0.423  
9,20.916,rs16929628,0.428  
9,21.016,rs17179053,0.445  
9,21.335,rs9657638,0.466  
9,21.386,rs4273904,0.472  
9,21.520,rs10977976,0.441  
9,21.539,rs2761735,0.436  
9,21.586,rs912356,0.420  
9,21.747,rs10978065,0.419  
9,21.771,rs10978074,0.402  
9,21.774,rs11999385,0.400  
9,21.785,rs10978080,0.349  
9,21.855,rs6477426,0.258  
9,21.856,rs16930657,0.258  
9,21.899,rs10491907,0.245  
9,21.914,rs7870939,0.241  
9,22.033,rs727756,0.235  
9,22.095,rs447910,0.232  
9,22.110,rs417403,0.232  
9,22.551,rs12164236,0.197  
9,22.571,rs1359095,0.197  
9,22.573,rs10959002,0.197  
9,22.727,rs7852334,0.145  
9,22.775,rs1535658,0.181  
9,22.783,rs6474539,0.182  
9,22.808,rs12006444,0.187  
9,22.971,rs7850565,0.227  
9,22.976,rs1537812,0.231  
9,22.985,rs12343415,0.237  
9,23.012,rs7870466,0.256  
9,23.032,rs833408,0.268  
9,23.102,rs833403,0.276  
9,23.193,rs7465708,0.253  
9,23.212,rs1322314,0.248  
9,23.259,rs2382220,0.244  
9,23.319,rs7040199,0.285  
9,23.353,rs4427223,0.282  
9,23.369,rs7029106,0.256  
9,23.378,rs10738180,0.260  
9,23.383,rs4113604,0.269  
9,23.386,rs7023148,0.269  
9,23.494,rs13283737,0.267  
9,23.688,rs2382245,0.281  
9,23.730,rs10511558,0.282



9,23.734,rs10809238,0.283  
9,23.818,rs7858983,0.290  
9,24.371,rs7044787,0.336  
9,24.547,rs1387292,0.350  
9,24.718,rs4483255,0.382  
9,24.852,rs10114729,0.369  
9,25.217,rs10732328,0.359  
9,25.231,rs12342107,0.359  
9,25.361,rs7037332,0.362  
9,25.369,rs10960403,0.365  
9,25.411,rs10809666,0.376  
9,25.416,rs12001461,0.377  
9,25.478,rs11789947,0.384  
9,25.504,rs7859230,0.410  
9,25.632,rs2066097,0.390  
9,25.678,rs946452,0.392  
9,25.726,rs17262250,0.401  
9,25.736,rs10283912,0.400  
9,25.812,rs7869172,0.344  
9,25.930,rs4740523,0.301  
9,25.949,rs10756373,0.286  
9,26.009,rs791681,0.330  
9,26.299,rs7855624,0.302  
9,26.312,rs7042370,0.302  
9,26.319,rs7029119,0.305  
9,26.383,rs483855,0.373  
9,26.430,rs6474741,0.377  
9,26.442,rs2183864,0.379  
9,26.470,rs1888859,0.391  
9,26.476,rs1412296,0.348  
9,26.494,rs10960847,0.358  
9,26.510,rs10809863,0.366  
9,26.617,rs1332071,0.301  
9,26.750,rs12351740,0.292  
9,26.772,rs10514822,0.291  
9,26.803,rs7029019,0.296  
9,26.866,rs999648,0.307  
9,27.001,rs11793993,0.310  
9,27.061,rs1811647,0.295  
9,27.066,rs10511579,0.294  
9,27.075,rs12341870,0.292  
9,27.169,rs1556577,0.274  
9,27.221,rs10961084,0.222  
9,27.234,rs1889297,0.210  
9,27.298,rs933034,0.176  
9,27.312,rs12004672,0.169  
9,27.392,rs7018881,0.134  
9,27.399,rs10961157,0.130  
9,27.430,rs12336782,0.123  
9,27.640,rs2382407,0.082  
9,27.689,rs10756497,0.086  
9,27.703,rs1034164,0.091  
9,27.748,rs7858704,0.128  
9,27.767,rs894822,0.118  
9,27.793,rs11788150,0.125  
9,27.829,rs10491766,0.126  
9,27.838,rs9407554,0.127  
9,27.948,rs1969938,0.160  
9,28.053,rs7048074,0.177  
9,28.111,rs12001724,0.177  
9,28.137,rs10961344,0.177

9,28.137,rs10961346,0.153  
9,28.139,rs10961347,0.154  
9,28.147,rs3920568,0.137  
9,28.159,rs10756524,0.138  
9,28.459,rs2382444,0.158  
9,28.493,rs1555553,0.161  
9,28.505,rs7027899,0.164  
9,28.648,rs1061820,0.179  
9,28.762,rs1033837,0.194  
9,29.138,rs10124289,0.238  
9,29.175,rs10810127,0.242  
9,29.188,rs17213362,0.270  
9,29.565,rs10961473,0.138  
9,29.586,rs2273933,0.135  
9,29.647,rs7874736,0.102  
9,30.112,rs10810132,0.013  
9,30.206,rs13295646,0.013  
9,30.223,rs598296,0.010  
9,30.250,rs877569,0.005  
9,30.260,rs10961483,0.005  
9,30.291,rs10756546,0.005  
9,30.299,rs471088,0.005  
9,30.306,rs10961490,0.006  
9,30.333,rs630973,0.010  
9,30.344,rs679613,0.012  
9,30.354,rs717932,0.017  
9,30.374,rs10481545,0.013  
9,30.500,rs1556032,0.006  
9,30.570,rs1323344,0.007  
9,30.687,rs873553,0.009  
9,30.701,rs927969,0.007  
9,30.740,rs10961560,0.005  
9,30.803,rs10491771,0.003  
9,30.856,rs7029906,0.002  
9,30.923,rs1343705,0.001  
9,31.055,rs6474850,0.003  
9,31.241,rs1048070,0.005  
9,31.255,rs8181217,0.007  
9,31.284,rs2890993,0.008  
9,31.289,rs2035987,0.008  
9,31.311,rs12685742,0.009  
9,31.312,rs16932272,0.009  
9,31.314,rs7039708,0.009  
9,31.395,rs12338615,0.011  
9,31.457,rs10810258,0.005  
9,31.520,rs16932386,0.000  
9,31.558,rs1996893,-0.000  
9,31.561,rs10810285,-0.000  
9,31.563,rs10961773,-0.000  
9,31.572,rs7044651,-0.000  
9,31.588,rs7034380,-0.000  
9,31.715,rs10961817,-0.001  
9,31.839,rs4445325,-0.001  
9,31.880,rs10961870,-0.002  
9,31.883,rs10738386,-0.001  
9,31.890,rs4364728,0.000  
9,31.891,rs10961876,0.000  
9,31.934,rs7871542,0.003  
9,31.962,rs1780160,0.001  
9,31.969,rs1780157,-0.000  
9,32.153,rs619105,-0.002

9,32.184,rs10961940,-0.004  
9,32.248,rs4741484,-0.010  
9,32.288,rs682092,-0.018  
9,32.311,rs10124733,-0.021  
9,32.340,rs473315,-0.014  
9,32.375,rs1105191,-0.013  
9,32.622,rs7857933,-0.044  
9,32.646,rs7871956,-0.048  
9,33.450,rs3008731,-0.028  
9,33.460,rs3008725,-0.028  
9,33.541,rs2987089,-0.027  
9,33.552,rs9298745,-0.028  
9,33.562,rs12553725,-0.028  
9,33.928,rs7044238,-0.038  
9,33.981,rs7038757,-0.038  
9,34.071,rs7875247,-0.030  
9,34.088,rs2151065,-0.028  
9,34.096,rs1571907,-0.027  
9,34.176,rs1571906,-0.017  
9,34.185,rs7857514,-0.017  
9,34.304,rs1360549,-0.022  
9,34.388,rs9407751,-0.017  
9,34.499,rs12683609,-0.013  
9,34.570,rs4961707,-0.014  
9,34.596,rs6475044,-0.014  
9,34.637,rs12000507,-0.010  
9,34.840,rs717267,-0.001  
9,34.896,rs7864652,-0.000  
9,35.099,rs950359,0.002  
9,35.118,rs7039706,0.002  
9,35.312,rs11788776,0.001  
9,35.375,rs2153271,0.000  
9,35.412,rs10733325,-0.001  
9,35.482,rs10962765,-0.000  
9,35.505,rs953586,-0.000  
9,35.518,rs1487509,-0.000  
9,35.603,rs2492870,-0.000  
9,36.056,rs4961441,0.000  
9,36.068,rs2593382,0.000  
9,36.072,rs2197152,0.000  
9,36.106,rs3780256,-0.000  
9,36.107,rs2243877,-0.000  
9,36.127,rs2593353,-0.002  
9,36.197,rs1885170,0.000  
9,36.222,rs10810812,0.001  
9,36.260,rs3780247,0.004  
9,36.265,rs2208494,0.005  
9,36.271,rs2208496,0.007  
9,36.277,rs10963179,0.007  
9,36.362,rs12376522,0.006  
9,36.375,rs4302941,0.005  
9,36.437,rs6475184,0.003  
9,36.444,rs10963309,0.003  
9,36.454,rs10963315,0.003  
9,36.497,rs1755289,0.002  
9,36.571,rs1360235,0.003  
9,36.604,rs1329923,0.005  
9,36.632,rs4618799,0.007  
9,36.720,rs7038985,0.006  
9,36.735,rs7846812,0.004  
9,36.815,rs12002789,0.000

9,36.865,rs4436218,-0.000  
9,36.993,rs10810961,-0.000  
9,37.077,rs2153417,-0.000  
9,37.290,rs4961652,0.000  
9,37.528,rs10119114,0.003  
9,37.639,rs10963675,0.005  
9,37.688,rs10811002,0.003  
9,37.692,rs776755,0.003  
9,37.730,rs776782,0.004  
9,37.740,rs776776,0.006  
9,37.758,rs702202,0.003  
9,37.778,rs1332706,0.003  
9,37.801,rs776761,0.003  
9,37.938,rs576026,0.007  
9,37.969,rs1332704,0.007  
9,38.003,rs2164000,0.006  
9,38.008,rs4246839,0.004  
9,38.011,rs1978746,0.004  
9,38.028,rs10118309,0.001  
9,38.040,rs7869627,0.001  
9,38.090,rs10963764,0.001  
9,38.141,rs10963779,0.001  
9,38.383,rs1327504,-0.000  
9,38.399,rs16937177,0.000  
9,38.400,rs10117672,0.000  
9,38.440,rs4977266,0.001  
9,38.452,rs7871217,0.005  
9,38.967,rs3824369,-0.001  
9,38.999,rs1982840,0.000  
9,39.013,rs10963994,0.001  
9,39.046,rs3004297,0.001  
9,39.140,rs4977286,0.002  
9,39.174,rs4262389,0.002  
9,39.647,rs6475326,0.007  
9,39.793,rs10964139,0.003  
9,39.825,rs7045369,0.002  
9,39.836,rs960908,0.003  
9,39.854,rs12336251,0.003  
9,39.872,rs10964160,0.004  
9,39.904,rs7858547,0.003  
9,40.006,rs4977303,0.001  
9,40.025,rs3780218,0.001  
9,40.206,rs10964234,-0.000  
9,40.220,rs2180939,-0.000  
9,40.235,rs2383113,-0.001  
9,40.272,rs7862478,-0.000  
9,40.276,rs12000690,-0.000  
9,40.398,rs6475366,0.001  
9,40.438,rs1409955,0.002  
9,40.543,rs4977334,0.001  
9,40.600,rs7025940,0.001  
9,40.615,rs2051134,0.001  
9,40.642,rs10738554,0.001  
9,40.852,rs7860695,0.012  
9,40.869,rs10964396,0.013  
9,40.985,rs10811316,0.007  
9,41.075,rs4977246,0.004  
9,41.130,rs7870612,0.004  
9,41.137,rs869149,0.004  
9,41.192,rs415026,0.006  
9,41.303,rs1456961,0.013

9,41.327,rs10811342,0.014  
9,41.334,rs882123,0.021  
9,41.399,rs224008,0.022  
9,41.431,rs10757132,0.023  
9,41.522,rs6475431,0.080  
9,41.526,rs3934325,0.084  
9,41.559,rs12682705,0.098  
9,41.566,rs1537073,0.101  
9,41.616,rs668703,0.115  
9,41.627,rs10811376,0.114  
9,41.632,rs2073854,0.114  
9,41.645,rs7851779,0.116  
9,41.686,rs10964665,0.135  
9,41.808,rs1986633,0.149  
9,41.894,rs4278230,0.152  
9,41.963,rs10757183,0.144  
9,41.967,rs4977959,0.145  
9,41.973,rs2032061,0.147  
9,41.999,rs7855438,0.154  
9,42.004,rs10757193,0.152  
9,42.173,rs4978113,0.135  
9,42.183,rs7025006,0.137  
9,42.222,rs2383192,0.156  
9,42.278,rs991794,0.170  
9,42.288,rs7033598,0.171  
9,42.330,rs754819,0.171  
9,42.360,rs13294794,0.161  
9,42.392,rs11788139,0.166  
9,42.449,rs1869203,0.160  
9,42.450,rs1377195,0.159  
9,42.749,rs7865829,0.141  
9,42.797,rs7023329,0.138  
9,42.892,rs3802393,0.133  
9,43.111,rs4977750,0.138  
9,43.122,rs10965197,0.138  
9,43.210,rs3731217,0.151  
9,43.432,rs7855162,0.185  
9,43.440,rs1547705,0.187  
9,43.445,rs4977574,0.187  
9,43.480,rs4977761,0.189  
9,43.481,rs2065501,0.140  
9,43.483,rs2065504,0.118  
9,43.536,rs2025796,0.111  
9,43.540,rs1679014,0.113  
9,43.654,rs1359741,0.145  
9,43.764,rs7868400,0.153  
9,43.838,rs4977586,0.142  
9,43.899,rs1414696,0.141  
9,44.162,rs1463006,0.164  
9,44.177,rs2383246,0.161  
9,44.189,rs10511719,0.159  
9,44.203,rs10733382,0.156  
9,44.222,rs10811812,0.153  
9,44.256,rs7859974,0.147  
9,44.283,rs2383251,0.153  
9,44.304,rs10511715,0.176  
9,44.337,rs10511712,0.180  
9,44.359,rs7873939,0.189  
9,44.398,rs10757399,0.222  
9,44.413,rs10811872,0.235  
9,44.478,rs7864583,0.216

9,44.496,rs7047280,0.213  
9,44.589,rs10811923,0.185  
9,44.608,rs7873308,0.172  
9,44.618,rs7030403,0.172  
9,44.661,rs274932,0.151  
9,44.662,rs10811933,0.150  
9,44.699,rs156396,0.149  
9,44.702,rs7865248,0.149  
9,44.739,rs7852159,0.149  
9,44.763,rs4977617,0.137  
9,44.772,rs1041350,0.141  
9,44.801,rs10966007,0.155  
9,44.809,rs10757442,0.158  
9,44.815,rs10448166,0.158  
9,44.828,rs996793,0.146  
9,44.832,rs2383268,0.142  
9,44.835,rs10966021,0.138  
9,44.853,rs1329024,0.131  
9,44.864,rs4977887,0.127  
9,44.869,rs16907652,0.125  
9,44.881,rs3793577,0.121  
9,44.926,rs1410846,0.131  
9,44.945,rs3793595,0.123  
9,44.962,rs12341793,0.123  
9,44.964,rs10966093,0.123  
9,45.002,rs12339691,0.126  
9,45.013,rs1376141,0.126  
9,45.021,rs515951,0.126  
9,45.059,rs10966141,0.122  
9,45.139,rs4615671,0.104  
9,45.141,rs4548269,0.104  
9,45.203,rs4977917,0.098  
9,45.239,rs2298620,0.085  
9,45.290,rs7871735,0.087  
9,45.360,rs637658,0.081  
9,45.419,rs829750,0.074  
9,45.520,rs4618784,0.068  
9,45.545,rs10812054,0.066  
9,45.978,rs1332677,0.065  
9,46.131,rs16908770,0.074  
9,46.183,rs11998852,0.077  
9,46.369,rs2038965,0.088  
9,46.495,rs1318995,0.113  
9,46.590,rs1461331,0.094  
9,46.590,rs10812156,0.094  
9,46.593,rs7046929,0.094  
9,46.598,rs1563950,0.095  
9,46.651,rs10966805,0.159  
9,46.653,rs10812206,0.135  
9,46.666,rs10757517,0.128  
9,46.669,rs4977974,0.129  
9,46.685,rs980462,0.133  
9,46.708,rs7035858,0.134  
9,47.151,rs1929973,0.079  
9,47.297,rs4451410,0.059  
9,47.351,rs10511761,0.052  
9,47.373,rs7036435,0.048  
9,47.423,rs10511762,0.041  
9,47.490,rs7036161,0.046  
9,47.507,rs4534200,0.050  
9,47.603,rs1128953,0.034

9,47.654,rs4461986,0.057  
9,47.746,rs12005755,0.057  
9,47.760,rs12352086,0.058  
9,47.829,rs10491876,0.048  
9,47.898,rs1220087,0.036  
9,47.953,rs1220064,0.037  
9,47.975,rs16909835,0.038  
9,48.117,rs541805,0.039  
9,48.224,rs1332340,0.033  
9,48.261,rs9942876,0.032  
9,48.354,rs957252,0.032  
9,48.488,rs6475882,0.024  
9,48.708,rs443014,0.030  
9,48.721,rs514616,0.030  
9,48.762,rs1336467,0.031  
9,48.895,rs6475895,0.036  
9,48.964,rs4111166,0.037  
9,49.063,rs1998909,0.031  
9,49.177,rs765888,0.024  
9,49.183,rs1434478,0.023  
9,49.240,rs1336336,0.021  
9,49.283,rs10967566,0.022  
9,49.370,rs12003612,0.022  
9,49.474,rs16910953,0.023  
9,49.543,rs621786,0.022  
9,49.560,rs7042267,0.023  
9,49.575,rs7034505,0.024  
9,49.575,rs7035021,0.024  
9,49.585,rs1413825,0.024  
9,49.596,rs666478,0.024  
9,49.610,rs581724,0.024  
9,49.613,rs1334811,0.016  
9,49.614,rs2224529,0.013  
9,49.624,rs692946,0.013  
9,49.802,rs1853186,0.011  
9,49.933,rs2383722,0.009  
9,50.058,rs10967882,0.008  
9,50.140,rs1571649,0.004  
9,50.166,rs10967901,0.003  
9,50.218,rs12003803,0.000  
9,50.237,rs1888380,0.000  
9,50.302,rs1330921,-0.000  
9,50.320,rs4483251,-0.001  
9,50.342,rs10967916,-0.000  
9,50.597,rs1161680,-0.001  
9,50.625,rs4878454,-0.001  
9,50.732,rs725804,-0.002  
9,50.777,rs10511816,-0.003  
9,50.822,rs1822723,-0.010  
9,51.206,rs1565948,-0.014  
9,51.265,rs2282241,-0.014  
9,51.299,rs1982915,-0.014  
9,51.311,rs12002175,-0.014  
9,51.342,rs702231,-0.015  
9,51.445,rs2889829,-0.020  
9,51.509,rs536635,-0.014  
9,51.611,rs6476005,-0.005  
9,51.652,rs6476012,-0.004  
9,51.683,rs2026147,-0.003  
9,51.688,rs4242689,-0.002  
9,51.701,rs1857079,-0.003

9,51.736,rs10968093,-0.004  
9,51.737,rs1536982,-0.004  
9,51.892,rs1342095,-0.001  
9,51.904,rs11795165,-0.001  
9,51.938,rs2383733,-0.001  
9,51.988,rs10968179,-0.000  
9,52.105,rs10968239,-0.000  
9,52.114,rs10968246,-0.000  
9,52.118,rs1930003,-0.000  
9,52.207,rs1343457,0.000  
9,52.232,rs1147819,0.001  
9,52.240,rs10968314,0.001  
9,52.260,rs7853840,0.001  
9,52.263,rs7858580,0.000  
9,52.273,rs7849984,0.000  
9,52.417,rs2044961,-0.000  
9,52.443,rs1319535,-0.000  
9,52.486,rs12682967,-0.000  
9,52.509,rs10511827,-0.000  
9,52.511,rs4399024,-0.000  
9,52.559,rs7038123,0.000  
9,52.565,rs4554572,0.000  
9,52.681,rs6476056,-0.000  
9,52.701,rs1360507,-0.000  
9,52.760,rs10491894,-0.003  
9,52.769,rs944594,-0.003  
9,52.801,rs16912913,-0.001  
9,52.802,rs2150855,-0.001  
9,52.875,rs10757755,-0.002  
9,52.888,rs12003711,-0.002  
9,52.912,rs2383772,-0.001  
9,53.032,rs188904,-0.000  
9,53.041,rs10491623,-0.000  
9,53.107,rs7847094,-0.000  
9,53.123,rs2066346,-0.000  
9,53.143,rs10813050,-0.002  
9,53.146,rs2183831,-0.002  
9,53.169,rs7022573,-0.003  
9,53.172,rs4879352,-0.002  
9,53.175,rs10969197,-0.002  
9,53.229,rs560764,-0.002  
9,53.292,rs10813150,-0.003  
9,53.369,rs1932131,-0.002  
9,53.521,rs12345491,-0.011  
9,53.524,rs10969455,-0.012  
9,53.533,rs10813205,-0.011  
9,53.606,rs2248860,-0.005  
9,53.620,rs2813941,-0.006  
9,53.658,rs1780055,-0.010  
9,53.671,rs1510909,-0.010  
9,53.814,rs7024169,-0.022  
9,53.895,rs3866499,-0.030  
9,54.017,rs10969854,-0.039  
9,54.066,rs7863381,-0.033  
9,54.130,rs7049218,-0.030  
9,54.135,rs12000796,-0.030  
9,54.225,rs12344989,-0.014  
9,54.264,rs6476284,-0.003  
9,54.316,rs10813601,-0.004  
9,54.350,rs7034481,-0.003  
9,54.413,rs12552096,-0.001



9,54.457,rs10813645,-0.002  
9,54.463,rs780757,-0.002  
9,54.470,rs997609,-0.002  
9,54.481,rs10813650,-0.002  
9,54.646,rs10813743,-0.004  
9,54.657,rs10970789,-0.004  
9,54.660,rs10970796,-0.004  
9,54.666,rs7859572,-0.004  
9,54.671,rs906585,-0.004  
9,54.746,rs17285159,-0.001  
9,54.754,rs10970869,-0.000  
9,54.757,rs1411872,0.000  
9,54.792,rs1331231,-0.000  
9,54.811,rs10970923,0.000  
9,54.849,rs7047398,0.000  
9,54.858,rs7847742,0.000  
9,54.863,rs6476361,0.000  
9,54.889,rs7022554,-0.000  
9,55.013,rs540467,-0.007  
9,55.025,rs10813840,-0.008  
9,55.068,rs2117523,-0.006  
9,55.103,rs4879604,-0.009  
9,55.116,rs960083,-0.012  
9,55.150,rs10971128,-0.008  
9,55.159,rs300629,-0.007  
9,55.226,rs1888871,-0.006  
9,55.255,rs12552198,-0.005  
9,55.395,rs10971412,-0.002  
9,55.404,rs4879666,-0.006  
9,55.420,rs7854765,-0.009  
9,55.447,rs855508,-0.009  
9,56.658,rs7871764,-0.001  
9,56.700,rs2275003,-0.003  
9,56.703,rs10971942,-0.003  
9,56.750,rs1041251,-0.000  
9,56.859,rs11788070,-0.001  
9,56.900,rs11793196,-0.001  
9,56.923,rs4395980,-0.001  
9,56.934,rs10758268,-0.001  
9,56.940,rs3763613,-0.000  
9,56.971,rs2070074,-0.001  
9,57.000,rs10972203,-0.001  
9,57.006,rs2297132,-0.001  
9,57.047,rs277558,-0.001  
9,57.062,rs924565,-0.001  
9,57.162,rs7048389,-0.000  
9,57.191,rs944700,-0.000  
9,57.206,rs4879869,-0.000  
9,57.277,rs10758303,-0.000  
9,57.431,rs4879913,-0.001  
9,57.443,rs1890592,-0.001  
9,57.449,rs2153240,-0.001  
9,57.461,rs2071675,-0.001  
9,57.474,rs4879926,-0.002  
9,57.511,rs7020142,-0.002  
9,57.537,rs10738948,-0.002  
9,57.571,rs2890719,-0.002  
9,57.572,rs2025175,-0.002  
9,57.585,rs10814300,-0.003  
9,57.595,rs7034414,-0.004  
9,57.613,rs1408466,-0.000

9,57.616,rs1324461,-0.000  
9,57.629,rs7863810,-0.000  
9,57.632,rs10814323,-0.000  
9,57.636,rs10972705,-0.001  
9,57.664,rs6476527,-0.001  
9,57.736,rs4878646,-0.014  
9,57.758,rs4879983,-0.017  
9,57.781,rs10814376,-0.018  
9,57.800,rs12553273,-0.019  
9,58.052,rs2094394,-0.046  
9,58.104,rs12379827,-0.041  
9,58.112,rs11792514,-0.040  
9,58.123,rs11794314,-0.039  
9,58.139,rs1887432,-0.030  
9,58.160,rs7857754,-0.029  
9,58.178,rs752358,-0.017  
9,58.217,rs1887438,-0.010  
9,58.364,rs10758401,-0.011  
9,58.479,rs1176844,-0.013  
9,58.522,rs2800266,-0.020  
9,58.744,rs7852051,-0.008  
9,58.815,rs10758407,-0.006  
9,58.990,rs3780138,-0.001  
9,59.053,rs11999298,-0.001  
9,59.236,rs3780151,-0.000  
9,59.247,rs10973133,-0.000  
9,59.256,rs4880042,-0.000  
9,59.263,rs1888016,-0.001  
9,59.288,rs4880048,-0.004  
9,59.313,rs2297106,-0.003  
9,59.595,rs10814520,-0.000  
9,59.617,rs765567,-0.000  
9,59.620,rs471579,0.000  
9,59.634,rs1571231,0.000  
9,59.646,rs2768659,0.000  
9,59.693,rs913279,0.001  
9,59.695,rs1571234,0.001  
9,59.737,rs927930,0.000  
9,59.754,rs7039920,0.000  
9,59.778,rs4621903,0.000  
9,59.838,rs1325916,-0.000  
9,59.857,rs13302352,0.000  
9,59.859,rs13298495,0.000  
9,59.880,rs2296553,0.000  
9,59.932,rs4878174,0.000  
9,60.062,rs776023,0.000  
9,60.119,rs12345885,0.000  
9,60.139,rs943936,0.001  
9,60.189,rs1928233,0.001  
9,60.261,rs12235873,0.000  
9,60.269,rs10973694,0.000  
9,60.287,rs2810729,0.000  
9,60.309,rs1006087,0.000  
9,60.316,rs2810723,0.000  
9,60.323,rs4388534,0.000  
9,60.344,rs4878190,0.000  
9,60.352,rs1348335,0.000  
9,60.355,rs10973734,0.000  
9,60.366,rs341466,0.000  
9,60.385,rs10814680,0.001  
9,60.396,rs4878795,0.001

9,60.401,rs1555480,0.001  
9,60.404,rs4242647,0.001  
9,60.406,rs2073478,0.001  
9,60.411,rs11791018,0.002  
9,60.412,rs4878811,0.002  
9,60.428,rs4480202,0.002  
9,60.436,rs4394481,0.004  
9,60.490,rs2993129,0.023  
9,60.526,rs10973948,0.030  
9,60.530,rs945844,0.030  
9,60.535,rs10758513,0.019  
9,60.536,rs16931666,0.019  
9,60.536,rs9407070,0.019  
9,60.547,rs7039377,0.034  
9,60.552,rs4593645,0.028  
9,60.559,rs10973981,0.040  
9,60.567,rs10511953,0.039  
9,60.568,rs7848575,0.041  
9,60.576,rs10758522,0.054  
9,60.578,rs10974006,0.058  
9,60.595,rs7037234,0.057  
9,60.760,rs4961901,0.027  
9,63.671,rs6606438,0.023  
9,65.909,rs449851,0.031  
9,65.965,rs10868795,0.027  
9,66.084,rs11142838,0.021  
9,66.113,rs4143074,0.020  
9,66.134,rs2183738,0.021  
9,66.156,rs7851511,0.026  
9,66.183,rs12004348,0.033  
9,66.240,rs1107108,0.027  
9,66.268,rs4745231,0.022  
9,66.278,rs7866673,0.020  
9,66.436,rs7855908,0.006  
9,66.541,rs10781306,0.001  
9,66.560,rs4745466,0.001  
9,66.573,rs883751,0.001  
9,66.578,rs2871223,0.001  
9,66.685,rs9314854,-0.000  
9,66.742,rs7870657,0.000  
9,66.779,rs955792,0.001  
9,66.780,rs2275431,0.001  
9,66.783,rs3750551,0.000  
9,66.792,rs17063341,0.000  
9,66.809,rs7861316,0.000  
9,66.819,rs7033674,0.000  
9,66.841,rs12001157,0.000  
9,66.853,rs1412243,0.000  
9,66.860,rs1970017,0.000  
9,66.874,rs1576508,0.000  
9,66.874,rs13288998,0.000  
9,66.877,rs975645,0.000  
9,66.880,rs7851932,0.000  
9,66.889,rs10867879,0.004  
9,66.911,rs1536993,0.009  
9,66.918,rs10511972,0.009  
9,66.921,rs10511973,0.007  
9,66.927,rs10217478,0.009  
9,66.944,rs4446788,0.015  
9,66.963,rs10521438,0.016  
9,66.980,rs10125617,0.017

9,67.078,rs4745013,0.023  
9,67.091,rs7029925,0.025  
9,67.150,rs1889915,0.035  
9,67.180,rs17458750,0.039  
9,67.263,rs4465028,0.048  
9,67.345,rs4745035,0.058  
9,67.360,rs1831143,0.050  
9,67.431,rs552849,0.025  
9,67.473,rs17056295,0.022  
9,67.507,rs1888076,0.019  
9,67.675,rs10781009,0.014  
9,67.713,rs1566837,0.014  
9,67.722,rs1021879,0.010  
9,67.738,rs10781013,0.008  
9,67.744,rs11792896,0.009  
9,67.844,rs1891301,0.002  
9,67.899,rs4745087,0.002  
9,68.016,rs2309974,0.002  
9,68.080,rs11142904,0.002  
9,68.133,rs868147,0.001  
9,68.210,rs4745114,0.003  
9,68.211,rs2297089,0.003  
9,68.239,rs3739781,0.005  
9,68.359,rs7030498,0.011  
9,68.363,rs11787649,0.017  
9,68.382,rs7039742,0.021  
9,68.411,rs10781076,0.048  
9,68.424,rs10869142,0.049  
9,68.437,rs10869149,0.053  
9,68.465,rs10746908,0.050  
9,68.472,rs13439944,0.050  
9,68.558,rs7853366,0.040  
9,68.659,rs11999628,0.026  
9,68.664,rs348472,0.026  
9,68.668,rs8187950,0.025  
9,68.695,rs1582620,0.019  
9,68.715,rs10869215,0.008  
9,68.730,rs2310329,0.002  
9,68.743,rs11143503,0.000  
9,68.745,rs2795108,0.000  
9,68.750,rs1342018,0.001  
9,68.755,rs4256646,0.000  
9,69.151,rs278729,-0.001  
9,69.207,rs157109,-0.001  
9,69.215,rs2492825,-0.001  
9,69.246,rs1505518,-0.001  
9,69.284,rs156772,-0.001  
9,69.293,rs1505517,-0.001  
9,69.461,rs1116198,-0.001  
9,69.941,rs3012844,0.001  
9,70.022,rs10781187,0.001  
9,70.104,rs10746936,0.003  
9,70.106,rs966266,0.003  
9,70.286,rs11143894,0.007  
9,70.346,rs12002539,0.005  
9,70.370,rs4255204,0.005  
9,70.509,rs915291,0.001  
9,70.648,rs7870498,0.001  
9,70.743,rs7032677,0.001  
9,70.760,rs1319551,0.001  
9,70.762,rs12352112,0.001

9,70.763,rs10869433,0.001  
9,70.856,rs519067,0.000  
9,70.987,rs6560408,-0.004  
9,71.001,rs11144085,-0.004  
9,71.024,rs7848706,-0.005  
9,71.122,rs12378991,-0.010  
9,71.129,rs6560417,-0.011  
9,71.177,rs1333343,-0.010  
9,71.203,rs2800249,-0.009  
9,71.238,rs1359879,-0.009  
9,71.396,rs11144184,-0.009  
9,71.497,rs911737,-0.010  
9,71.519,rs4442208,-0.010  
9,71.619,rs7872448,-0.009  
9,71.620,rs10869509,-0.009  
9,71.631,rs2273770,-0.009  
9,71.642,rs2146044,-0.010  
9,71.680,rs1081877,-0.011  
9,71.738,rs10124785,-0.016  
9,71.800,rs7032088,-0.013  
9,71.806,rs2095057,-0.013  
9,71.809,rs10869533,-0.013  
9,72.054,rs1409937,-0.012  
9,72.104,rs7019425,-0.012  
9,72.172,rs13287590,-0.013  
9,72.186,rs1327371,-0.013  
9,72.192,rs13301187,-0.021  
9,72.192,rs9314833,-0.022  
9,72.300,rs1327369,-0.039  
9,72.349,rs1591079,-0.039  
9,72.456,rs4451372,-0.036  
9,72.587,rs10118286,-0.039  
9,72.603,rs11144511,-0.048  
9,72.631,rs11144516,-0.051  
9,72.751,rs1927986,-0.057  
9,72.785,rs943863,-0.060  
9,72.806,rs7866089,-0.062  
9,72.947,rs487502,-0.072  
9,72.959,rs2479843,-0.072  
9,73.126,rs4745444,-0.076  
9,73.341,rs1934737,-0.072  
9,73.374,rs7862766,-0.068  
9,73.415,rs4745464,-0.066  
9,73.465,rs12115679,-0.069  
9,73.510,rs2377426,-0.076  
9,73.600,rs10781320,-0.087  
9,73.756,rs12000040,-0.078  
9,73.911,rs10781324,-0.077  
9,73.997,rs11144723,-0.082  
9,74.028,rs1029040,-0.084  
9,74.031,rs1023181,-0.084  
9,74.074,rs11144728,-0.084  
9,74.163,rs1258094,-0.088  
9,74.178,rs1475615,-0.040  
9,74.207,rs2297343,-0.028  
9,74.226,rs1339236,-0.025  
9,74.244,rs4745511,-0.035  
9,74.256,rs1888705,-0.034  
9,74.261,rs1331386,-0.034  
9,74.270,rs2377527,-0.034  
9,74.275,rs2270570,-0.035

9,74.288,rs966097,-0.036  
9,74.293,rs10746995,-0.039  
9,74.336,rs2261557,-0.058  
9,74.342,rs1002420,-0.065  
9,74.350,rs2643322,-0.072  
9,74.391,rs7026142,-0.064  
9,74.396,rs680448,-0.068  
9,74.483,rs1886268,-0.062  
9,74.576,rs7043420,-0.068  
9,74.611,rs2149589,-0.068  
9,74.724,rs700809,-0.080  
9,74.807,rs7859873,-0.090  
9,74.847,rs666721,-0.095  
9,75.102,rs2225245,-0.111  
9,75.176,rs7861307,-0.117  
9,75.195,rs3924629,-0.120  
9,75.211,rs10781380,-0.123  
9,75.320,rs10869832,-0.162  
9,75.342,rs7853555,-0.198  
9,75.383,rs1361856,-0.223  
9,75.397,rs12238848,-0.191  
9,75.478,rs1125469,-0.140  
9,75.511,rs7031918,-0.141  
9,75.588,rs10121560,-0.143  
9,75.656,rs10217550,-0.130  
9,75.695,rs2183770,-0.142  
9,75.788,rs7853173,-0.150  
9,75.827,rs7044545,-0.148  
9,75.848,rs11145238,-0.151  
9,75.869,rs11145269,-0.155  
9,75.882,rs4361823,-0.156  
9,76.108,rs7034531,-0.188  
9,76.137,rs17063627,-0.203  
9,76.140,rs2296781,-0.205  
9,76.157,rs4745639,-0.233  
9,76.164,rs1547190,-0.243  
9,76.173,rs994362,-0.233  
9,76.210,rs636562,-0.252  
9,76.236,rs10869945,-0.178  
9,76.236,rs7035476,-0.178  
9,76.261,rs1162211,-0.162  
9,76.276,rs1953330,-0.153  
9,76.288,rs13288161,-0.102  
9,76.406,rs1328531,-0.108  
9,76.458,rs10869977,-0.109  
9,76.459,rs17786782,-0.109  
9,76.774,rs17787781,-0.171  
9,76.815,rs10116267,-0.179  
9,76.921,rs12376992,-0.205  
9,76.946,rs7855727,-0.224  
9,76.955,rs2998680,-0.229  
9,76.971,rs3849862,-0.235  
9,77.003,rs1566977,-0.241  
9,77.009,rs1505618,-0.244  
9,77.027,rs9695134,-0.254  
9,77.078,rs2106804,-0.302  
9,77.128,rs1757947,-0.309  
9,77.168,rs10867255,-0.339  
9,77.178,rs6559406,-0.356  
9,77.192,rs10867271,-0.386  
9,77.202,rs4300072,-0.381

9,77.226,rs7867205,-0.380  
9,77.376,rs11788493,-0.440  
9,77.405,rs6559443,-0.447  
9,77.568,rs11138085,-0.441  
9,77.584,rs1873738,-0.440  
9,77.600,rs4877475,-0.442  
9,77.627,rs273432,-0.436  
9,77.631,rs12351466,-0.435  
9,77.633,rs273473,-0.440  
9,77.652,rs11138141,-0.486  
9,77.662,rs4877483,-0.493  
9,77.670,rs7021045,-0.496  
9,77.684,rs11138168,-0.502  
9,77.699,rs10867379,-0.502  
9,77.709,rs9410806,-0.491  
9,77.778,rs10491794,-0.544  
9,77.812,rs11138303,-0.564  
9,77.859,rs4877146,-0.585  
9,77.913,rs10867418,-0.547  
9,77.993,rs7858020,-0.519  
9,78.001,rs4877153,-0.511  
9,78.004,rs7039360,-0.507  
9,78.009,rs3894377,-0.542  
9,78.060,rs10867444,-0.475  
9,78.084,rs913757,-0.486  
9,78.087,rs11138436,-0.483  
9,78.127,rs1328430,-0.470  
9,78.165,rs1887722,-0.461  
9,78.209,rs10114675,-0.475  
9,78.209,rs7044051,-0.476  
9,78.373,rs10867485,-0.478  
9,78.514,rs915004,-0.474  
9,78.631,rs928537,-0.471  
9,78.840,rs1857469,-0.474  
9,78.852,rs7860480,-0.474  
9,78.900,rs1550051,-0.475  
9,78.916,rs11138689,-0.476  
9,78.926,rs10119230,-0.477  
9,79.211,rs1410542,-0.465  
9,79.730,rs10735555,-0.468  
9,79.792,rs12002342,-0.473  
9,79.906,rs10491942,-0.512  
9,79.953,rs10780472,-0.528  
9,80.003,rs2378554,-0.529  
9,80.025,rs1572003,-0.527  
9,80.080,rs4390020,-0.569  
9,80.126,rs2777674,-0.565  
9,80.144,rs10115607,-0.555  
9,80.175,rs7869606,-0.540  
9,80.305,rs7869726,-0.480  
9,80.308,rs10780513,-0.477  
9,80.386,rs584846,-0.438  
9,80.422,rs4877214,-0.375  
9,80.438,rs11139315,-0.369  
9,80.450,rs10481754,-0.373  
9,80.456,rs911639,-0.382  
9,80.464,rs7039820,-0.381  
9,80.469,rs10867778,-0.376  
9,80.478,rs10867781,-0.366  
9,80.486,rs7856583,-0.376  
9,80.489,rs1342478,-0.378

9,80.493,rs3814532,-0.330  
9,80.500,rs4877669,-0.340  
9,80.521,rs3739581,-0.382  
9,80.555,rs7023749,-0.345  
9,80.585,rs12377016,-0.312  
9,80.596,rs1010745,-0.305  
9,80.600,rs637736,-0.302  
9,80.613,rs609658,-0.294  
9,80.614,rs7030006,-0.293  
9,80.621,rs669223,-0.335  
9,80.637,rs10121323,-0.329  
9,80.650,rs478787,-0.323  
9,80.651,rs11139442,-0.324  
9,80.654,rs4999155,-0.324  
9,80.662,rs7024973,-0.320  
9,80.728,rs2184427,-0.313  
9,80.921,rs4877228,-0.289  
9,81.058,rs7049209,-0.306  
9,81.154,rs10867852,-0.331  
9,81.239,rs7031058,-0.341  
9,81.400,rs493701,-0.357  
9,81.411,rs12236312,-0.399  
9,81.504,rs932638,-0.442  
9,81.513,rs11788842,-0.443  
9,81.562,rs2378645,-0.441  
9,81.577,rs4877240,-0.442  
9,81.605,rs2208622,-0.444  
9,81.617,rs10491542,-0.444  
9,81.736,rs7860062,-0.444  
9,81.830,rs10867921,-0.460  
9,82.003,rs11795101,-0.489  
9,82.037,rs11139921,-0.484  
9,82.096,rs4322086,-0.506  
9,82.112,rs11139944,-0.509  
9,82.124,rs10867947,-0.531  
9,82.127,rs7046769,-0.545  
9,82.130,rs10115371,-0.557  
9,82.154,rs12335503,-0.595  
9,82.187,rs11139984,-0.606  
9,82.229,rs10867967,-0.616  
9,82.257,rs10867970,-0.614  
9,82.305,rs10867985,-0.618  
9,82.310,rs10123088,-0.618  
9,82.331,rs10867992,-0.620  
9,82.346,rs2889243,-0.618  
9,82.346,rs4242620,-0.617  
9,82.479,rs4877761,-0.614  
9,82.486,rs3860922,-0.663  
9,82.575,rs3860941,-0.697  
9,82.659,rs13289150,-0.742  
9,82.680,rs7025704,-0.768  
9,82.736,rs10113885,-0.784  
9,82.764,rs2780980,-0.789  
9,83.219,rs4298563,-0.773  
9,83.344,rs4877815,-0.795  
9,83.410,rs973460,-0.781  
9,83.433,rs1898321,-0.763  
9,83.460,rs4471123,-0.736  
9,83.461,rs11140361,-0.736  
9,83.522,rs2118169,-0.683  
9,83.537,rs10512144,-0.671



9,83.546,rs1246267,-0.669  
9,83.655,rs4877822,-0.654  
9,83.780,rs17087049,-0.673  
9,83.790,rs10868142,-0.675  
9,83.814,rs11140525,-0.673  
9,83.827,rs17343066,-0.670  
9,83.850,rs12348550,-0.689  
9,83.894,rs11140555,-0.723  
9,83.915,rs12004770,-0.722  
9,84.031,rs7875211,-0.711  
9,84.056,rs11140629,-0.722  
9,84.060,rs1409706,-0.722  
9,84.106,rs7026337,-0.726  
9,84.482,rs11140831,-0.730  
9,84.718,rs615189,-0.662  
9,84.902,rs620420,-0.590  
9,84.924,rs329206,-0.569  
9,85.084,rs895606,-0.438  
9,85.096,rs2841455,-0.432  
9,85.138,rs11140976,-0.429  
9,85.163,rs7042753,-0.513  
9,85.171,rs9314742,-0.510  
9,85.175,rs10512168,-0.519  
9,85.176,rs4588941,-0.521  
9,85.180,rs3860946,-0.531  
9,85.404,rs4877947,-0.551  
9,86.010,rs7039482,-0.596  
9,86.065,rs10512169,-0.601  
9,86.465,rs957617,-0.611  
9,86.493,rs4338185,-0.606  
9,86.610,rs12378988,-0.583  
9,86.798,rs7036724,-0.527  
9,86.846,rs4484780,-0.513  
9,87.037,rs791323,-0.459  
9,87.165,rs353807,-0.478  
9,87.174,rs17051878,-0.477  
9,87.183,rs1331844,-0.440  
9,87.224,rs189544,-0.437  
9,87.256,rs353834,-0.437  
9,87.401,rs11792704,-0.507  
9,87.437,rs962704,-0.518  
9,87.447,rs913357,-0.477  
9,87.459,rs7026807,-0.482  
9,87.553,rs11141456,-0.448  
9,87.577,rs4492454,-0.449  
9,87.594,rs1331453,-0.450  
9,87.638,rs2183730,-0.453  
9,87.668,rs6559946,-0.450  
9,87.784,rs7864375,-0.502  
9,87.792,rs932858,-0.464  
9,87.928,rs374503,-0.460  
9,87.989,rs7021048,-0.457  
9,88.044,rs1169848,-0.461  
9,88.056,rs10868499,-0.462  
9,88.183,rs7036455,-0.494  
9,88.250,rs10448319,-0.503  
9,88.315,rs17052425,-0.510  
9,88.335,rs12553476,-0.512  
9,88.663,rs277714,-0.493  
9,88.699,rs12336476,-0.495  
9,88.932,rs10780825,-0.506

9,88.957,rs4878060,-0.499  
9,88.980,rs10868564,-0.485  
9,89.079,rs4878075,-0.426  
9,89.143,rs10868585,-0.393  
9,89.255,rs3758308,-0.358  
9,89.308,rs871495,-0.374  
9,89.323,rs10512186,-0.374  
9,89.351,rs7036598,-0.370  
9,89.440,rs1473180,-0.395  
9,89.459,rs3739784,-0.404  
9,89.463,rs3124237,-0.406  
9,89.464,rs7027958,-0.407  
9,89.477,rs1015477,-0.408  
9,89.491,rs7869944,-0.414  
9,89.518,rs3124238,-0.426  
9,89.541,rs1927976,-0.380  
9,89.593,rs4878117,-0.353  
9,89.617,rs3128479,-0.330  
9,89.727,rs7870268,-0.338  
9,89.748,rs17053425,-0.343  
9,89.750,rs10780872,-0.344  
9,89.869,rs6420260,-0.348  
9,89.997,rs10780878,-0.432  
9,90.001,rs12346877,-0.433  
9,90.168,rs560019,-0.465  
9,90.170,rs2271992,-0.465  
9,90.325,rs7871733,-0.465  
9,90.343,rs538970,-0.463  
9,90.398,rs4877394,-0.445  
9,90.433,rs11142112,-0.438  
9,90.434,rs12237927,-0.438  
9,90.668,rs10780907,-0.540  
9,90.761,rs4877434,-0.636  
9,90.762,rs4877435,-0.635  
9,90.769,rs4877132,-0.630  
9,90.812,rs7865913,-0.594  
9,91.496,rs4877455,-0.569  
9,91.598,rs4877464,-0.572  
9,91.945,rs17080818,-0.601  
9,92.083,rs1857496,-0.624  
9,92.147,rs7048152,-0.627  
9,92.406,rs2174057,-0.585  
9,92.689,rs7019570,-0.518  
9,92.765,rs9410427,-0.501  
9,92.866,rs11137472,-0.483  
9,92.923,rs6559331,-0.467  
9,92.978,rs2150611,-0.461  
9,92.986,rs944482,-0.462  
9,93.168,rs9410453,-0.458  
9,93.689,rs4877062,-0.375  
9,94.080,rs11137559,-0.327  
9,94.117,rs4074459,-0.359  
9,94.128,rs4073713,-0.364  
9,94.169,rs10908892,-0.375  
9,94.173,rs1571534,-0.376  
9,94.176,rs11265783,-0.374  
9,94.240,rs1571536,-0.296  
9,94.254,rs7872758,-0.293  
9,94.263,rs10908907,-0.291  
9,94.285,rs4876993,-0.288  
9,94.298,rs10120215,-0.234

9,94.305,rs4242594,-0.198  
9,94.399,rs9722251,-0.196  
9,94.427,rs10116554,-0.184  
9,94.441,rs9777581,-0.158  
9,94.577,rs4744157,-0.225  
9,94.598,rs10821475,-0.230  
9,94.641,rs10991799,-0.211  
9,94.675,rs7874990,-0.211  
9,94.675,rs12115490,-0.213  
9,94.686,rs16906203,-0.259  
9,94.686,rs1854444,-0.291  
9,94.686,rs1329047,-0.290  
9,94.689,rs4744106,-0.273  
9,94.700,rs964912,-0.248  
9,94.829,rs2380292,-0.240  
9,94.890,rs1777045,-0.266  
9,95.074,rs10761389,-0.273  
9,95.126,rs7341780,-0.278  
9,95.199,rs2613339,-0.285  
9,95.233,rs1017753,-0.273  
9,95.257,rs4744473,-0.261  
9,95.301,rs1173104,-0.243  
9,95.384,rs290267,-0.182  
9,95.398,rs3789889,-0.192  
9,95.409,rs914925,-0.209  
9,95.429,rs4744514,-0.221  
9,95.438,rs1760125,-0.226  
9,95.441,rs4744516,-0.226  
9,95.446,rs7864625,-0.222  
9,95.448,rs10512202,-0.220  
9,95.462,rs1172665,-0.212  
9,95.466,rs10512203,-0.209  
9,95.468,rs10993751,-0.185  
9,95.469,rs7864740,-0.186  
9,95.520,rs192703,-0.191  
9,95.574,rs1551746,-0.180  
9,95.605,rs296639,-0.210  
9,95.621,rs296620,-0.216  
9,95.653,rs4604577,-0.222  
9,95.677,rs4744038,-0.222  
9,95.686,rs10991808,-0.223  
9,95.699,rs7025775,-0.222  
9,95.853,rs7024443,-0.196  
9,95.854,rs1758695,-0.196  
9,95.862,rs7021746,-0.195  
9,95.930,rs12350727,-0.242  
9,95.934,rs7025323,-0.242  
9,95.982,rs1388966,-0.251  
9,96.031,rs10992022,-0.247  
9,96.049,rs7032274,-0.246  
9,96.097,rs7466603,-0.202  
9,96.109,rs9409651,-0.191  
9,96.142,rs7029673,-0.195  
9,96.143,rs17514461,-0.195  
9,96.146,rs3935382,-0.195  
9,96.215,rs7045662,-0.242  
9,96.226,rs7858435,-0.250  
9,96.337,rs12006507,-0.240  
9,96.473,rs3780346,-0.228  
9,96.711,rs7868651,-0.224  
9,96.782,rs10992498,-0.227

9,96.907,rs7850247,-0.213  
9,96.949,rs11788432,-0.210  
9,96.979,rs4744167,-0.216  
9,96.991,rs10992622,-0.247  
9,97.016,rs10992630,-0.219  
9,97.037,rs12003264,-0.218  
9,97.061,rs7025554,-0.214  
9,97.317,rs10739948,-0.181  
9,97.401,rs10992747,-0.172  
9,97.412,rs4744244,-0.171  
9,97.552,rs12551314,-0.161  
9,97.554,rs7033146,-0.161  
9,97.620,rs7023781,-0.199  
9,97.643,rs4744272,-0.208  
9,97.668,rs2255840,-0.214  
9,97.767,rs10992913,-0.210  
9,97.836,rs10992966,-0.203  
9,97.858,rs12353447,-0.200  
9,97.986,rs10429556,-0.196  
9,98.085,rs959802,-0.192  
9,98.093,rs10993070,-0.191  
9,98.102,rs10114341,-0.190  
9,98.185,rs7029157,-0.157  
9,98.192,rs2675275,-0.155  
9,98.210,rs3118766,-0.135  
9,98.240,rs1536690,-0.138  
9,98.451,rs9409787,-0.176  
9,98.470,rs12342274,-0.170  
9,98.547,rs2987900,-0.146  
9,98.581,rs10993269,-0.121  
9,98.640,rs10124217,-0.160  
9,98.658,rs12349751,-0.164  
9,98.700,rs10512235,-0.163  
9,99.169,rs1020963,-0.149  
9,99.833,rs356665,-0.129  
9,99.908,rs357527,-0.120  
9,99.915,rs357522,-0.121  
9,99.940,rs4448343,-0.130  
9,99.957,rs576594,-0.132  
9,99.973,rs10818991,-0.133  
9,99.981,rs930280,-0.138  
9,99.998,rs458477,-0.156  
9,100.005,rs2782951,-0.163  
9,100.010,rs354271,-0.166  
9,100.012,rs817166,-0.165  
9,100.024,rs4743293,-0.156  
9,100.028,rs7854146,-0.153  
9,100.029,rs7047415,-0.153  
9,100.051,rs2149564,-0.153  
9,100.118,rs4592147,-0.151  
9,100.127,rs4743521,-0.147  
9,100.140,rs4743556,-0.143  
9,100.142,rs7041700,-0.142  
9,100.146,rs12341515,-0.137  
9,100.151,rs4743597,-0.132  
9,100.174,rs2031321,-0.099  
9,100.183,rs2026001,-0.093  
9,100.184,rs2476923,-0.092  
9,100.194,rs8190512,-0.074  
9,100.203,rs12685240,-0.085  
9,100.212,rs10820410,-0.096

9,100.335,rs1596359,-0.095  
9,100.568,rs4743056,-0.095  
9,100.970,rs2242187,-0.078  
9,101.035,rs7853581,-0.079  
9,101.152,rs4576532,-0.072  
9,101.159,rs10759754,-0.073  
9,101.177,rs10982602,-0.079  
9,101.185,rs10817737,-0.082  
9,101.198,rs1475545,-0.070  
9,101.330,rs715749,-0.075  
9,101.430,rs2668802,-0.076  
9,101.441,rs2805838,-0.076  
9,101.488,rs1877432,-0.075  
9,101.523,rs7871887,-0.076  
9,101.648,rs6586,-0.079  
9,101.703,rs1059003,-0.078  
9,101.847,rs10984649,-0.072  
9,102.126,rs1886002,-0.058  
9,102.132,rs10760120,-0.058  
9,102.172,rs1746239,-0.060  
9,102.234,rs814027,-0.073  
9,102.305,rs16913573,-0.086  
9,102.361,rs3780453,-0.062  
9,102.391,rs12348328,-0.061  
9,102.596,rs7850445,-0.030  
9,102.680,rs12236069,-0.025  
9,103.142,rs7026022,-0.042  
9,103.317,rs1962051,-0.032  
9,103.810,rs1999877,-0.029  
9,104.146,rs10989097,-0.026  
9,104.264,rs1226588,-0.026  
9,104.374,rs13285837,-0.027  
9,104.396,rs6479028,-0.028  
9,104.494,rs10819849,-0.028  
9,104.524,rs16919567,-0.029  
9,104.732,rs10989395,-0.036  
9,104.741,rs2993805,-0.036  
9,104.801,rs1431463,-0.050  
9,104.812,rs9697078,-0.050  
9,104.862,rs1367756,-0.032  
9,104.931,rs1418002,-0.029  
9,104.950,rs10989474,-0.028  
9,104.969,rs1417999,-0.027  
9,104.982,rs2229594,-0.027  
9,105.016,rs2253258,-0.028  
9,105.020,rs17185855,-0.028  
9,105.026,rs546577,-0.028  
9,105.055,rs573816,-0.033  
9,105.073,rs10989518,-0.039  
9,105.085,rs1929494,-0.045  
9,105.173,rs1983812,-0.071  
9,105.194,rs1407877,-0.074  
9,105.374,rs4742825,-0.098  
9,105.376,rs10819994,-0.113  
9,105.396,rs2013563,-0.071  
9,105.407,rs16936082,-0.065  
9,105.441,rs16920898,-0.045  
9,105.478,rs10820006,-0.050  
9,105.480,rs1165806,-0.059  
9,105.536,rs1007468,-0.063  
9,105.566,rs4743514,-0.062

9,105.791,rs320202,-0.068  
9,105.809,rs12336913,-0.069  
9,105.812,rs1932169,-0.069  
9,105.825,rs16921368,-0.068  
9,105.861,rs7869148,-0.065  
9,105.900,rs959065,-0.063  
9,105.906,rs4376547,-0.062  
9,105.910,rs2417335,-0.062  
9,105.978,rs10733724,-0.058  
9,106.081,rs4743564,-0.058  
9,106.095,rs7875594,-0.059  
9,106.111,rs7046513,-0.058  
9,106.120,rs4743569,-0.057  
9,106.127,rs1332988,-0.056  
9,106.152,rs4743571,-0.058  
9,106.221,rs1552766,-0.027  
9,106.286,rs10990384,-0.023  
9,106.326,rs10760932,-0.021  
9,106.342,rs947184,-0.017  
9,106.367,rs12347896,-0.012  
9,106.373,rs843166,-0.011  
9,106.397,rs7873512,-0.007  
9,106.429,rs1839166,-0.006  
9,106.452,rs4743634,-0.006  
9,106.506,rs1378974,-0.005  
9,106.517,rs373637,-0.006  
9,106.588,rs12683176,-0.009  
9,106.606,rs17790711,-0.011  
9,106.636,rs2202828,-0.006  
9,106.669,rs4540458,-0.007  
9,106.727,rs17799628,-0.007  
9,106.739,rs970603,-0.007  
9,106.799,rs6479189,-0.007  
9,106.927,rs10820559,-0.012  
9,107.196,rs7874564,-0.013  
9,107.376,rs630103,-0.013  
9,107.931,rs2122582,-0.013  
9,108.027,rs884258,-0.027  
9,108.065,rs4743707,-0.025  
9,108.098,rs2933323,-0.022  
9,108.233,rs6479245,-0.014  
9,108.249,rs6479250,-0.015  
9,108.308,rs1464670,-0.012  
9,108.422,rs4742921,-0.013  
9,108.460,rs2230808,-0.013  
9,108.474,rs3818688,-0.012  
9,108.475,rs2254884,-0.012  
9,108.489,rs2065412,-0.024  
9,108.511,rs4149281,-0.036  
9,108.519,rs2000069,-0.036  
9,108.543,rs2482424,-0.021  
9,108.548,rs10820743,-0.018  
9,108.558,rs10991411,-0.017  
9,108.584,rs2472516,-0.006  
9,108.587,rs1561166,-0.006  
9,108.592,rs9919066,-0.006  
9,108.640,rs328875,-0.002  
9,108.643,rs328880,-0.002  
9,108.678,rs10991516,-0.006  
9,108.698,rs3005716,-0.010  
9,108.700,rs4609251,-0.010

9,108.717,rs7858499,-0.011  
9,108.755,rs3005738,-0.012  
9,108.933,rs957903,-0.024  
9,108.982,rs7872832,-0.037  
9,109.138,rs10978179,-0.048  
9,109.142,rs885954,-0.048  
9,109.149,rs583973,-0.061  
9,109.156,rs1463983,-0.061  
9,109.408,rs17285571,-0.040  
9,109.500,rs10978413,-0.033  
9,109.533,rs4742988,-0.031  
9,109.538,rs1516885,-0.031  
9,109.652,rs16936272,-0.023  
9,109.740,rs10759179,-0.009  
9,109.751,rs10759181,-0.008  
9,109.787,rs13294274,-0.003  
9,109.801,rs16925492,-0.001  
9,109.877,rs989980,0.002  
9,110.055,rs7018699,0.024  
9,110.195,rs1907438,0.031  
9,110.234,rs16925649,0.034  
9,110.317,rs1491113,0.040  
9,110.634,rs2172111,0.052  
9,110.647,rs2451948,0.052  
9,110.654,rs2493636,0.052  
9,110.677,rs10978628,0.052  
9,110.711,rs4237185,0.053  
9,110.846,rs4625093,0.040  
9,111.452,rs12345400,0.039  
9,111.632,rs12351052,0.038  
9,111.637,rs1714474,0.038  
9,111.677,rs2417773,0.048  
9,111.690,rs12335940,0.065  
9,111.697,rs12336793,0.063  
9,111.710,rs2680197,0.062  
9,111.718,rs2680208,0.067  
9,111.726,rs13292544,0.072  
9,111.832,rs16912372,0.053  
9,111.838,rs1323809,0.053  
9,111.869,rs10816494,0.051  
9,111.891,rs1538985,0.044  
9,111.903,rs1746837,0.041  
9,111.919,rs817827,0.036  
9,111.952,rs12336348,0.034  
9,111.955,rs10739244,0.034  
9,111.963,rs947126,0.033  
9,111.985,rs10759237,0.036  
9,112.005,rs1819730,0.033  
9,112.037,rs954700,0.029  
9,112.060,rs7041758,0.030  
9,112.078,rs10119193,0.029  
9,112.095,rs10122326,0.026  
9,112.103,rs2258083,0.024  
9,112.156,rs7019214,0.011  
9,112.177,rs1110403,0.009  
9,112.216,rs7849612,0.005  
9,112.236,rs10816550,0.003  
9,112.257,rs2049366,0.005  
9,112.303,rs4979291,0.002  
9,112.306,rs7863292,0.002  
9,112.310,rs1851741,0.002

9,112.314,rs944178,0.002  
9,112.359,rs17625789,0.005  
9,112.368,rs953383,0.006  
9,112.390,rs9632903,0.006  
9,112.392,rs7848776,0.006  
9,112.408,rs10733565,0.005  
9,112.462,rs10759261,0.007  
9,112.488,rs944472,0.004  
9,112.497,rs1929276,0.004  
9,112.530,rs1361369,0.006  
9,112.544,rs7026539,0.007  
9,112.573,rs498924,0.014  
9,112.594,rs7029391,0.016  
9,112.630,rs10512368,0.023  
9,112.731,rs10124038,0.023  
9,112.759,rs595811,0.034  
9,112.788,rs4542003,0.024  
9,112.815,rs10759273,0.025  
9,112.989,rs1330591,0.037  
9,113.058,rs1570504,0.031  
9,113.132,rs4978345,0.024  
9,113.243,rs1556950,0.027  
9,113.343,rs9886734,0.029  
9,113.381,rs7047863,0.040  
9,113.500,rs10979564,0.084  
9,113.533,rs2275496,0.093  
9,113.709,rs866311,0.104  
9,113.943,rs10816772,0.120  
9,114.044,rs3983526,0.126  
9,114.089,rs7858370,0.124  
9,114.100,rs7860076,0.123  
9,114.121,rs2012370,0.116  
9,114.238,rs3793549,0.127  
9,114.252,rs3763640,0.128  
9,114.272,rs4978793,0.105  
9,114.298,rs12553743,0.102  
9,114.303,rs7857376,0.102  
9,114.323,rs10979838,0.101  
9,114.421,rs17793748,0.097  
9,114.466,rs4978813,0.095  
9,114.490,rs10124300,0.098  
9,114.574,rs4978839,0.117  
9,114.594,rs10123567,0.103  
9,114.596,rs10979965,0.100  
9,114.618,rs1407394,0.093  
9,114.639,rs10979982,0.092  
9,114.783,rs10512400,0.094  
9,114.802,rs7028330,0.108  
9,114.866,rs10759367,0.148  
9,114.887,rs7032049,0.152  
9,114.900,rs7867595,0.152  
9,114.937,rs10980089,0.153  
9,114.947,rs10980096,0.153  
9,114.969,rs9409096,0.157  
9,115.002,rs1981035,0.164  
9,115.065,rs7035935,0.165  
9,115.112,rs995294,0.167  
9,115.143,rs12555129,0.177  
9,115.257,rs481661,0.222  
9,115.273,rs1980874,0.223  
9,115.300,rs7026192,0.244



9,115.334,rs2900505,0.247  
9,115.389,rs6477758,0.180  
9,115.481,rs7030192,0.168  
9,115.615,rs1889325,0.160  
9,115.631,rs10980412,0.164  
9,115.634,rs7046184,0.164  
9,115.706,rs16915122,0.182  
9,115.711,rs2991364,0.183  
9,115.734,rs11788554,0.182  
9,115.791,rs7875689,0.170  
9,115.801,rs4302915,0.170  
9,115.894,rs3010815,0.158  
9,115.939,rs7049083,0.154  
9,116.104,rs1409686,0.137  
9,116.106,rs2846444,0.137  
9,116.124,rs2821140,0.138  
9,116.125,rs540171,0.138  
9,116.201,rs512756,0.147  
9,116.203,rs693342,0.146  
9,116.229,rs1536435,0.109  
9,116.438,rs12353038,0.146  
9,116.451,rs2287005,0.135  
9,116.463,rs7041855,0.126  
9,116.482,rs4978434,0.125  
9,116.514,rs4246886,0.105  
9,116.629,rs2026801,0.092  
9,116.684,rs16936387,0.087  
9,116.690,rs7871113,0.087  
9,116.697,rs7020211,0.088  
9,116.750,rs7861100,0.095  
9,116.766,rs9299199,0.097  
9,116.840,rs17320021,0.098  
9,116.847,rs10980952,0.098  
9,116.897,rs10817197,0.098  
9,116.984,rs7863832,0.132  
9,116.988,rs16916293,0.133  
9,117.221,rs10817227,0.134  
9,117.300,rs16916456,0.127  
9,117.354,rs419097,0.111  
9,117.371,rs4979067,0.106  
9,117.379,rs7047037,0.105  
9,117.446,rs4401941,0.101  
9,117.487,rs7854368,0.097  
9,117.570,rs7854746,0.078  
9,117.639,rs2900537,0.077  
9,117.729,rs7855745,0.080  
9,117.760,rs7038217,0.079  
9,118.279,rs7862690,0.066  
9,118.481,rs1537055,0.077  
9,119.447,rs2798317,0.044  
9,119.515,rs4979142,0.037  
9,119.580,rs10981474,0.030  
9,119.588,rs786962,0.030  
9,119.647,rs805050,0.029  
9,119.971,rs1925081,0.037  
9,120.058,rs9886741,0.036  
9,120.096,rs4979204,0.036  
9,120.099,rs10981589,0.036  
9,120.102,rs10513176,0.036  
9,120.157,rs10981613,0.050  
9,120.264,rs13294922,0.057

9,120.321,rs9792498,0.056  
9,120.352,rs4344146,0.075  
9,120.376,rs10739387,0.078  
9,120.646,rs10817479,0.114  
9,120.710,rs4978539,0.123  
9,120.723,rs12342334,0.124  
9,120.731,rs10817488,0.106  
9,120.737,rs1043836,0.107  
9,120.752,rs818702,0.120  
9,120.762,rs818708,0.129  
9,120.763,rs1805313,0.130  
9,120.767,rs2761016,0.131  
9,121.148,rs10817494,0.206  
9,121.187,rs540599,0.211  
9,121.222,rs7862521,0.194  
9,121.223,rs7035632,0.194  
9,121.231,rs13291990,0.198  
9,121.249,rs2101069,0.220  
9,121.292,rs16907988,0.238  
9,121.295,rs586348,0.240  
9,121.427,rs10981914,0.259  
9,121.453,rs1359637,0.248  
9,121.481,rs10981955,0.236  
9,121.483,rs2150014,0.235  
9,121.485,rs1571578,0.219  
9,121.486,rs11787940,0.190  
9,121.487,rs1853546,0.203  
9,121.488,rs3810928,0.221  
9,121.490,rs4978567,0.219  
9,121.514,rs2043195,0.213  
9,121.526,rs2002284,0.210  
9,121.543,rs919641,0.204  
9,121.563,rs2808781,0.197  
9,121.599,rs2808770,0.201  
9,121.620,rs10759685,0.209  
9,121.621,rs7875437,0.196  
9,121.623,rs10982124,0.176  
9,121.625,rs1623718,0.150  
9,121.626,rs5003737,0.149  
9,121.627,rs1766059,0.149  
9,121.629,rs946053,0.149  
9,121.631,rs4979365,0.141  
9,121.634,rs7851482,0.130  
9,121.649,rs10759693,0.126  
9,121.665,rs1535960,0.108  
9,121.672,rs10759716,0.078  
9,121.678,rs4979427,0.059  
9,121.683,rs12238437,0.055  
9,121.688,rs4979444,0.051  
9,121.691,rs12379659,0.050  
9,121.701,rs7853853,0.051  
9,121.704,rs17816047,0.052  
9,121.793,rs7048659,0.083  
9,121.937,rs2006996,0.086  
9,122.065,rs7028891,0.096  
9,122.111,rs2295800,0.097  
9,122.198,rs17292115,0.077  
9,122.209,rs11791315,0.079  
9,122.269,rs10123153,0.090  
9,122.328,rs10817694,0.100  
9,122.473,rs1556220,0.100

9,122.542,rs1330351,0.098  
9,122.611,rs10982536,0.097  
9,122.660,rs10982549,0.097  
9,122.847,rs10759761,0.097  
9,122.861,rs1335357,0.097  
9,122.879,rs10817727,0.097  
9,122.932,rs10120911,0.097  
9,122.960,rs10125253,0.097  
9,123.039,rs7039836,0.095  
9,123.097,rs1157836,0.101  
9,123.192,rs7859920,0.130  
9,123.199,rs1981500,0.174  
9,123.229,rs10982853,0.128  
9,123.233,rs956325,0.125  
9,123.354,rs7855735,0.109  
9,123.401,rs7865455,0.106  
9,123.514,rs11787606,0.137  
9,123.531,rs7467853,0.142  
9,123.592,rs10817854,0.160  
9,123.611,rs1901069,0.166  
9,123.656,rs204169,0.169  
9,123.822,rs446783,0.145  
9,123.875,rs10983088,0.168  
9,123.901,rs10435873,0.187  
9,123.945,rs11999361,0.190  
9,123.963,rs13294988,0.195  
9,123.990,rs12353147,0.212  
9,124.093,rs6478241,0.245  
9,124.140,rs16933725,0.222  
9,124.214,rs961797,0.259  
9,124.219,rs12338231,0.308  
9,124.220,rs10983343,0.317  
9,124.222,rs1441750,0.326  
9,124.224,rs4837849,0.324  
9,124.226,rs7021928,0.322  
9,124.241,rs7034397,0.293  
9,124.266,rs2225067,0.274  
9,124.280,rs10983400,0.240  
9,124.281,rs7029188,0.238  
9,124.328,rs1537528,0.275  
9,124.330,rs10739481,0.244  
9,124.342,rs10481683,0.275  
9,124.343,rs10983472,0.274  
9,124.350,rs6478278,0.266  
9,124.360,rs1105892,0.254  
9,124.376,rs11789213,0.245  
9,124.387,rs13283855,0.239  
9,124.392,rs1537526,0.236  
9,124.404,rs977937,0.229  
9,124.425,rs10121207,0.254  
9,124.468,rs7021801,0.229  
9,124.542,rs1416942,0.221  
9,124.798,rs10983672,0.199  
9,124.817,rs2786130,0.195  
9,124.915,rs1985317,0.200  
9,125.049,rs7858743,0.194  
9,125.149,rs1928295,0.185  
9,125.256,rs913615,0.176  
9,125.379,rs2722841,0.137  
9,125.400,rs2416604,0.133  
9,125.745,rs12552190,0.113

9,125.785,rs1571272,0.090  
9,126.021,rs7866799,0.066  
9,126.267,rs1984268,0.053  
9,126.480,rs17448174,0.032  
9,126.485,rs10116305,0.032  
9,126.500,rs10818187,0.031  
9,126.506,rs10759982,0.031  
9,126.554,rs7864368,0.036  
9,126.581,rs10984116,0.051  
9,126.772,rs4836729,0.072  
9,126.792,rs577362,0.076  
9,126.799,rs16907545,0.076  
9,126.823,rs12235164,0.075  
9,126.915,rs2136062,0.073  
9,126.961,rs943259,0.073  
9,127.275,rs12237612,0.111  
9,127.401,rs2818294,0.130  
9,127.450,rs4836741,0.130  
9,127.495,rs10760015,0.120  
9,127.577,rs7018768,0.121  
9,127.756,rs1043379,0.091  
9,127.830,rs10760025,0.077  
9,127.836,rs680003,0.076  
9,127.898,rs4540472,0.045  
9,127.913,rs2025501,0.042  
9,127.936,rs10984519,0.037  
9,127.976,rs9299261,0.026  
9,127.996,rs1412055,0.031  
9,128.005,rs10984568,0.035  
9,128.026,rs1009470,0.047  
9,128.050,rs990622,0.045  
9,128.090,rs7021853,0.043  
9,128.128,rs1860665,0.042  
9,128.144,rs6415829,0.012  
9,128.150,rs12551982,0.004  
9,128.196,rs1413317,0.013  
9,128.197,rs16909026,0.012  
9,128.200,rs1333913,0.012  
9,128.217,rs2225659,0.001  
9,128.222,rs10984725,-0.001  
9,128.238,rs1333908,-0.005  
9,128.240,rs6478444,-0.005  
9,128.272,rs10984806,-0.003  
9,128.275,rs12344392,-0.003  
9,128.294,rs6478456,-0.005  
9,128.301,rs945246,-0.006  
9,128.315,rs4837719,-0.003  
9,128.344,rs10739558,-0.001  
9,128.356,rs887807,-0.000  
9,128.380,rs1537282,0.000  
9,128.387,rs7852100,0.000  
9,128.411,rs7869290,0.000  
9,128.558,rs3761847,0.000  
9,128.569,rs7035682,0.000  
9,128.727,rs1590345,0.001  
9,129.124,rs4837876,0.013  
9,129.180,rs580010,0.016  
9,129.214,rs2777319,0.020  
9,129.238,rs1984035,0.013  
9,129.244,rs2789875,0.013  
9,129.279,rs12554667,0.017

9,129.317,rs7875955,0.024  
9,129.554,rs10818605,0.001  
9,129.603,rs7871736,0.001  
9,129.637,rs9408931,0.001  
9,129.653,rs6478548,0.001  
9,129.718,rs4534187,0.000  
9,130.001,rs10760211,0.001  
9,130.006,rs2039197,0.004  
9,130.033,rs10818649,0.001  
9,130.040,rs10818651,0.001  
9,130.054,rs12345155,0.001  
9,130.077,rs10733657,0.001  
9,130.079,rs1060586,0.001  
9,130.083,rs11794068,0.001  
9,130.134,rs10818673,0.000  
9,130.242,rs4837960,0.001  
9,130.390,rs7865902,0.005  
9,130.416,rs2416863,0.006  
9,130.441,rs10985662,0.009  
9,130.465,rs10818708,0.012  
9,130.498,rs2416875,0.013  
9,130.499,rs7859232,0.013  
9,130.584,rs727913,0.014  
9,130.597,rs10491515,0.016  
9,130.639,rs2215532,0.022  
9,130.645,rs237617,0.022  
9,130.648,rs237622,0.023  
9,130.865,rs10818752,0.012  
9,130.868,rs7037776,0.012  
9,131.031,rs10818768,0.014  
9,132.358,rs2416901,0.002  
9,132.368,rs10114139,0.003  
9,132.398,rs10985997,0.000  
9,132.401,rs4838057,-0.000  
9,132.413,rs12347955,-0.000  
9,132.414,rs7026808,-0.000  
9,132.418,rs3924101,-0.000  
9,132.423,rs10818820,-0.003  
9,132.802,rs4836950,-0.000  
9,132.816,rs1327291,0.000  
9,132.881,rs4838113,0.006  
9,132.884,rs10986211,0.005  
9,132.897,rs1463729,0.004  
9,132.904,rs2638377,0.004  
9,132.924,rs7865381,0.004  
9,133.080,rs4838118,0.002  
9,133.090,rs662621,0.004  
9,133.096,rs11789451,0.005  
9,133.119,rs636033,0.005  
9,133.327,rs599063,0.002  
9,133.545,rs2819625,0.000  
9,133.601,rs6478704,-0.000  
9,133.616,rs10760398,-0.000  
9,134.151,rs7031865,0.000  
9,134.158,rs11793676,0.000  
9,134.489,rs7045552,0.008  
9,134.536,rs13290624,0.005  
9,134.546,rs4838311,0.004  
9,134.571,rs10217721,0.004  
9,134.636,rs2041944,0.001  
9,134.652,rs4838340,0.001

9,134.667,rs7046411,0.001  
9,134.691,rs10122194,0.001  
9,134.706,rs7018610,0.001  
9,134.707,rs10987177,0.001  
9,134.756,rs2417008,0.001  
9,134.766,rs2065183,0.001  
9,134.779,rs12005670,0.000  
9,134.813,rs10760423,-0.000  
9,134.848,rs2026808,-0.000  
9,134.856,rs1317309,0.000  
9,134.860,rs7466244,0.000  
9,134.863,rs1230760,0.000  
9,134.877,rs504184,0.000  
9,134.927,rs505442,-0.000  
9,134.955,rs10124379,-0.000  
9,135.101,rs2417022,-0.000  
9,135.118,rs10987305,0.000  
9,135.169,rs10987324,0.001  
9,135.195,rs945683,0.001  
9,135.211,rs10987361,0.007  
9,135.266,rs4455975,0.007  
9,135.283,rs12336217,0.009  
9,135.303,rs7853174,0.006  
9,135.344,rs10733682,0.009  
9,135.370,rs3850586,0.008  
9,135.395,rs913716,0.007  
9,135.422,rs12352423,0.009  
9,135.432,rs2417038,0.010  
9,135.457,rs2900252,0.014  
9,135.510,rs10819243,0.025  
9,135.816,rs10819272,0.041  
9,135.910,rs2779727,0.045  
9,136.121,rs2265814,0.043  
9,136.168,rs2252730,0.042  
9,136.245,rs17382675,0.051  
9,136.334,rs1999224,0.057  
9,136.399,rs7856096,0.051  
9,136.414,rs10121110,0.049  
9,136.421,rs7865146,0.051  
9,136.441,rs10819317,0.047  
9,136.454,rs3739821,0.046  
9,136.508,rs4240425,0.085  
9,136.568,rs3003609,0.118  
9,136.806,rs4271068,0.122  
9,137.376,rs7019382,0.141  
9,138.255,rs10988014,0.168  
9,138.852,rs4836625,0.158  
9,138.969,rs2293964,0.159  
9,139.239,rs2287363,0.164  
9,139.287,rs11564101,0.172  
9,139.479,rs7036689,0.205  
9,139.541,rs10988248,0.214  
9,139.602,rs10739745,0.176  
9,139.683,rs10819490,0.153  
9,139.732,rs4837357,0.187  
9,139.740,rs10988323,0.192  
9,139.765,rs4837360,0.220  
9,139.824,rs3853486,0.233  
9,139.859,rs7046787,0.199  
9,139.899,rs914708,0.233  
9,139.912,rs1147338,0.240

9,139.988,rs1220793,0.200  
9,140.009,rs1780456,0.192  
9,140.080,rs7867936,0.172  
9,140.096,rs1220687,0.171  
9,140.114,rs1220680,0.197  
9,140.147,rs1220651,0.188  
9,140.197,rs1861782,0.171  
9,140.208,rs3088095,0.167  
9,140.234,rs7866311,0.164  
9,140.289,rs10819557,0.182  
9,140.313,rs3861882,0.179  
9,140.383,rs10739757,0.223  
9,140.408,rs3844048,0.189  
9,140.440,rs11999731,0.191  
9,140.471,rs7025992,0.187  
9,140.600,rs880242,0.180  
9,140.879,rs1923664,0.168  
9,140.991,rs2159640,0.166  
9,141.075,rs1003415,0.177  
9,141.104,rs12347960,0.142  
9,141.136,rs12378342,0.150  
9,141.146,rs3780708,0.145  
9,141.202,rs7024495,0.132  
9,141.327,rs4837486,0.113  
9,141.389,rs6478961,0.132  
9,141.665,rs914977,0.131  
9,141.688,rs7047329,0.140  
9,141.707,rs7031579,0.143  
9,141.712,rs7020021,0.144  
9,141.766,rs10736862,0.147  
9,141.776,rs7044220,0.146  
9,141.815,rs12342208,0.134  
9,141.839,rs11243372,0.150  
9,141.953,rs13301412,0.124  
9,141.976,rs4740339,0.137  
9,141.983,rs7874812,0.143  
9,142.015,rs4740194,0.161  
9,142.320,rs2583839,0.162  
9,142.433,rs2855179,0.176  
9,142.609,rs12005009,0.192  
9,142.650,rs3802347,0.202  
9,142.680,rs13293102,0.216  
9,142.702,rs7864465,0.232  
9,142.730,rs10901309,0.241  
9,142.774,rs12346096,0.215  
9,142.800,rs10901316,0.194  
9,142.825,rs10901317,0.156  
9,142.846,rs915401,0.120  
9,142.882,rs3808810,0.077  
9,142.890,rs3780275,0.073  
9,142.916,rs10901333,0.086  
9,142.992,rs818051,0.058  
9,143.037,rs353513,0.050  
9,143.072,rs102993,0.052  
9,143.555,rs9966,0.034  
9,143.642,rs10793992,0.033  
9,143.774,rs2986608,0.034  
9,144.060,rs4740438,0.046  
9,144.076,rs522464,0.067  
9,144.150,rs2050243,0.068  
9,144.201,rs7852711,0.065

9,144.297,rs6597494,0.059  
9,145.492,rs7036006,0.006  
9,145.495,rs4740170,0.003  
9,145.577,rs17148209,0.001  
9,145.589,rs4740304,0.001  
9,145.610,rs1887778,0.003  
9,145.614,rs869382,0.000  
9,145.619,rs3012735,0.001  
9,145.628,rs10901096,0.000  
9,145.634,rs12683140,0.000  
9,145.639,rs11243539,0.001  
9,145.673,rs2987392,0.001  
9,145.702,rs2987401,0.001  
9,146.008,rs7047055,0.001  
9,146.494,rs1331630,0.002  
9,146.497,rs7865653,0.002  
9,146.526,rs9411446,0.003  
9,146.581,rs11788925,0.005  
9,146.617,rs7870760,0.006  
9,146.686,rs17148812,0.006  
9,146.687,rs1810887,0.005  
9,146.726,rs4962062,0.001  
9,146.873,rs514279,0.008  
9,147.098,rs944616,0.008  
9,147.113,rs557495,0.009  
9,147.213,rs529317,0.043  
9,147.227,rs787887,0.046  
9,147.277,rs472207,0.058  
9,147.352,rs10120389,0.062  
9,147.399,rs518457,0.064  
9,147.426,rs2363020,0.065  
9,147.474,rs944812,0.065  
9,147.626,rs717770,0.068  
9,147.657,rs880182,0.068  
9,147.729,rs445990,0.068  
9,148.120,rs306530,0.076  
9,148.180,rs4962210,0.094  
9,148.207,rs11243900,0.094  
9,148.821,rs3761840,0.122  
9,148.896,rs7040593,0.123  
9,148.976,rs7036106,0.125  
9,148.993,rs1964196,0.129  
9,149.027,rs8193003,0.130  
9,149.035,rs678946,0.131  
9,149.067,rs628094,0.137  
9,149.080,rs603328,0.136  
9,149.155,rs608604,0.130  
9,149.156,rs7035838,0.129  
9,149.244,rs7863758,0.090  
9,149.329,rs509064,0.067  
9,149.391,rs7023365,0.061  
9,149.510,rs482670,0.077  
9,149.563,rs7022583,0.072  
9,149.613,rs2073924,0.067  
9,149.646,rs2039184,0.075  
9,149.773,rs4489379,0.083  
9,149.813,rs11999677,0.083  
9,149.994,rs630014,0.083  
9,150.139,rs597411,0.074  
9,150.765,rs3094378,0.112  
9,151.501,rs3025336,0.127



9,151.552,rs1029372,0.127  
9,151.606,rs11998869,0.135  
9,151.654,rs3025373,0.145  
9,151.693,rs2007153,0.153  
9,151.703,rs2873804,0.154  
9,151.773,rs77905,0.180  
9,152.066,rs694821,0.147  
9,152.365,rs10993790,0.108  
9,152.410,rs622035,0.104  
9,152.474,rs602990,0.108  
9,152.551,rs3824561,0.112  
9,152.751,rs3893493,0.108  
9,153.226,rs608402,0.074  
9,153.288,rs2265520,0.085  
9,153.360,rs654387,0.060  
9,153.524,rs452943,0.043  
9,153.539,rs3780792,0.041  
9,153.542,rs2506686,0.041  
9,153.614,rs7018770,0.035  
9,153.637,rs2789864,0.033  
9,153.709,rs460126,0.023  
9,153.755,rs17664384,0.022  
9,154.016,rs17566226,0.017  
9,154.056,rs1075654,0.019  
9,154.243,rs2427971,0.032  
9,154.383,rs4292757,0.053  
9,154.420,rs4744560,0.059  
9,155.110,rs7028191,0.113  
9,155.140,rs10881587,0.104  
9,155.224,rs4917362,0.066  
9,155.275,rs4917339,0.055  
9,155.351,rs1889152,0.050  
9,155.367,rs1930788,0.048  
9,155.494,rs7871088,0.071  
9,155.779,rs4917354,0.086  
9,156.284,rs1805343,0.158  
9,156.334,rs3118526,0.162  
9,156.586,rs10776949,0.174  
9,156.720,rs9409970,0.158  
9,156.731,rs3132330,0.177  
9,156.779,rs10776839,0.155  
9,156.833,rs1006418,0.163  
9,156.890,rs943423,0.163  
9,157.181,rs4842136,0.196  
9,157.211,rs7020813,0.202  
9,157.309,rs12344933,0.234  
9,157.332,rs7341858,0.208  
9,157.484,rs10858265,0.261  
9,157.531,rs4335205,0.276  
9,157.738,rs4842145,0.270  
9,157.763,rs3109678,0.257  
9,157.797,rs10745384,0.248  
9,157.829,rs4842169,0.245  
9,157.846,rs4842173,0.202  
9,157.873,rs9410004,0.165  
9,157.885,rs4073505,0.142  
9,157.890,rs3128632,0.138  
9,157.921,rs2989735,0.130  
9,157.946,rs2274838,0.132  
9,157.961,rs10858302,0.134  
9,157.997,rs13290953,0.140

9,158.016,rs10776925,0.147  
9,158.018,rs6537976,0.148  
9,158.038,rs607223,0.143  
9,158.072,rs546682,0.141  
9,158.095,rs899842,0.146  
9,158.101,rs11103675,0.145  
9,158.111,rs7039212,0.145  
9,158.131,rs1778992,0.147  
9,158.132,rs1752664,0.147  
9,158.139,rs1778990,0.141  
9,158.156,rs7034486,0.108  
9,158.159,rs2382864,0.101  
9,158.167,rs10858365,0.073  
9,158.168,rs10858366,0.071  
9,158.182,rs1891996,0.044  
9,158.192,rs7042583,0.042  
9,158.198,rs7028584,0.043  
9,158.222,rs2382859,0.042  
9,158.230,rs11792631,0.044  
9,158.251,rs11103787,0.068  
9,158.252,rs914405,0.070  
9,158.261,rs10745401,0.103  
9,158.271,rs10858383,0.130  
9,158.275,rs3884535,0.112  
9,158.279,rs7032559,0.107  
9,158.317,rs9409933,0.108  
9,158.360,rs13294986,0.135  
9,158.372,rs6537893,0.102  
9,158.391,rs10776810,0.095  
9,158.416,rs4841875,0.108  
9,158.425,rs2590504,0.098  
9,158.433,rs1412512,0.075  
9,158.447,rs3762067,0.052  
9,158.462,rs756684,0.027  
9,158.472,rs13284515,0.022  
9,158.489,rs462537,0.021  
9,158.490,rs7045084,0.019  
9,158.499,rs7023309,0.008  
9,158.507,rs11103063,0.017  
9,158.525,rs7029507,0.014  
9,158.537,rs7873626,0.010  
9,158.555,rs4841889,0.005  
9,158.570,rs11103115,0.004  
9,158.585,rs488948,0.004  
9,158.600,rs514157,0.004  
9,158.638,rs487750,0.004  
9,158.674,rs10735239,0.005  
9,158.697,rs914428,0.003  
9,158.794,rs1009473,0.001  
9,158.829,rs4842047,0.001  
9,158.859,rs7868264,0.010  
9,158.882,rs2152174,0.011  
9,158.898,rs7869795,0.011  
9,158.915,rs4842074,0.007  
9,158.946,rs4842091,0.000  
9,158.956,rs11103302,0.001  
9,158.961,rs10776875,0.002  
9,158.980,rs1717453,0.001  
9,159.019,rs1747846,0.002  
9,159.022,rs1747856,0.002  
9,159.081,rs3780190,0.004

9,159.235,rs3812561,0.012  
9,159.293,rs1127152,0.016  
9,159.354,rs3124599,0.023  
9,159.364,rs3124607,0.025  
9,159.373,rs13290979,0.026  
9,159.426,rs944758,0.016  
9,159.440,rs11145791,0.008  
9,159.441,rs10870094,0.007  
9,159.480,rs7871194,0.003  
9,159.487,rs4880117,0.002  
9,159.507,rs9411216,0.003  
9,159.528,rs10870112,0.006  
9,159.613,rs945387,0.005  
9,159.727,rs3750512,0.003  
9,159.762,rs11793787,0.003  
9,159.824,rs12337910,0.001  
9,159.827,rs7038280,0.001  
9,159.925,rs10870198,0.006  
9,160.224,rs10116708,0.001  
9,160.238,rs4962232,0.001  
9,160.258,rs11137410,0.001  
9,160.278,rs1099298,0.001  
9,160.429,rs7039441,0.003  
9,160.544,rs4526432,0.002  
9,160.564,rs7862101,0.002  
9,160.567,rs11137281,0.002  
9,160.744,rs1123190,0.001  
9,160.791,rs2739257,0.000  
9,160.792,rs2606357,0.000  
10,1.427,rs4881313,0.003  
10,1.683,rs17136372,0.011  
10,1.728,rs1581843,0.015  
10,1.730,rs2265090,0.008  
10,1.736,rs7916968,0.008  
10,1.756,rs943204,0.008  
10,1.807,rs10752019,0.009  
10,1.901,rs11253471,0.008  
10,2.107,rs10508204,0.004  
10,2.173,rs10794717,0.004  
10,2.202,rs7899518,0.001  
10,2.295,rs4002637,0.000  
10,2.296,rs883248,0.002  
10,2.330,rs4880802,0.003  
10,2.353,rs6560721,0.006  
10,2.390,rs4880811,0.013  
10,2.393,rs1027604,0.021  
10,2.395,rs1542874,0.021  
10,2.397,rs11250389,0.022  
10,2.435,rs904962,0.028  
10,2.462,rs2892333,0.029  
10,2.516,rs11592576,0.039  
10,2.540,rs2805543,0.044  
10,2.587,rs10903459,0.036  
10,2.600,rs2676753,0.035  
10,2.602,rs7906088,0.033  
10,2.611,rs12784235,0.033  
10,2.668,rs7082213,0.036  
10,2.689,rs4880516,0.040  
10,2.696,rs2813363,0.041  
10,2.786,rs2813392,0.055  
10,2.795,rs4880882,0.056

10,2.877,rs1112787,0.066  
10,2.970,rs10082419,0.081  
10,3.069,rs4880897,0.092  
10,3.293,rs7896371,0.122  
10,3.332,rs11250736,0.155  
10,3.375,rs6560762,0.171  
10,3.425,rs4880535,0.198  
10,3.650,rs6560768,0.153  
10,3.808,rs4076746,0.152  
10,4.008,rs4880930,0.188  
10,4.028,rs7912438,0.191  
10,4.265,rs17222168,0.209  
10,4.330,rs7923512,0.214  
10,4.513,rs10794806,0.247  
10,4.558,rs10903603,0.251  
10,4.653,rs7912369,0.262  
10,4.854,rs1414125,0.273  
10,5.040,rs4880970,0.293  
10,5.150,rs10794850,0.277  
10,5.327,rs1999531,0.237  
10,5.405,rs17817879,0.226  
10,5.437,rs10508223,0.224  
10,5.485,rs1984070,0.219  
10,5.642,rs7919956,0.225  
10,5.660,rs12412942,0.231  
10,5.675,rs7087615,0.240  
10,5.689,rs12779267,0.237  
10,5.707,rs7084211,0.234  
10,5.734,rs7895038,0.235  
10,5.765,rs4880562,0.239  
10,5.810,rs17158371,0.244  
10,5.825,rs9423540,0.246  
10,5.845,rs9663489,0.242  
10,5.907,rs4433480,0.251  
10,6.556,rs7893477,0.249  
10,6.974,rs1008859,0.214  
10,7.011,rs7920763,0.199  
10,7.041,rs7906405,0.210  
10,7.105,rs7909413,0.200  
10,7.242,rs1413764,0.183  
10,7.601,rs11251491,0.161  
10,8.046,rs1889504,0.140  
10,8.082,rs1577251,0.140  
10,8.501,rs2065681,0.138  
10,8.617,rs4436465,0.140  
10,8.761,rs6601988,0.140  
10,9.119,rs4242741,0.136  
10,10.572,rs10794989,0.113  
10,10.656,rs17135074,0.118  
10,10.750,rs7089499,0.124  
10,10.898,rs10732921,0.151  
10,10.921,rs7091953,0.132  
10,10.991,rs11251694,0.132  
10,11.030,rs4881075,0.148  
10,11.053,rs2388595,0.131  
10,11.057,rs10903963,0.132  
10,11.072,rs2892550,0.128  
10,11.096,rs2306304,0.122  
10,11.101,rs2388567,0.121  
10,11.146,rs4880592,0.182  
10,11.188,rs3740607,0.177

10,11.248,rs17133550,0.156  
10,11.268,rs7078068,0.150  
10,11.296,rs17131865,0.110  
10,11.337,rs10751916,0.072  
10,11.405,rs12269271,0.076  
10,11.438,rs2814925,0.070  
10,11.453,rs2814930,0.075  
10,11.493,rs4489652,0.090  
10,11.499,rs12220117,0.089  
10,11.533,rs1570856,0.087  
10,11.607,rs549676,0.083  
10,11.647,rs737533,0.102  
10,11.695,rs10751920,0.108  
10,11.718,rs1337381,0.110  
10,11.861,rs10508254,0.112  
10,12.287,rs1441265,0.113  
10,12.456,rs7919625,0.118  
10,12.523,rs11251995,0.108  
10,12.565,rs10508258,0.102  
10,12.623,rs2129446,0.082  
10,12.640,rs4881197,0.083  
10,12.743,rs7094917,0.073  
10,12.828,rs7071559,0.041  
10,12.839,rs2171302,0.041  
10,12.904,rs7919841,0.062  
10,12.921,rs7906552,0.060  
10,12.952,rs7076208,0.047  
10,12.961,rs11252119,0.043  
10,12.964,rs17842279,0.034  
10,12.964,rs11252121,0.033  
10,12.964,rs6601764,0.033  
10,12.979,rs4880635,0.013  
10,12.980,rs7914924,0.011  
10,12.982,rs11591800,0.008  
10,12.992,rs10904103,0.009  
10,13.005,rs11597773,0.016  
10,13.061,rs17135906,0.013  
10,13.090,rs4881226,0.014  
10,13.192,rs4881234,0.015  
10,13.208,rs12217962,0.016  
10,13.245,rs943031,0.015  
10,13.396,rs11252237,0.013  
10,13.632,rs11252318,0.019  
10,13.679,rs11252333,0.031  
10,13.761,rs1885477,0.019  
10,13.898,rs17132251,0.030  
10,13.962,rs2181124,0.034  
10,14.086,rs4881303,0.022  
10,14.175,rs1923396,0.016  
10,14.400,rs11252485,0.038  
10,14.482,rs12784701,0.056  
10,14.523,rs993175,0.050  
10,14.618,rs1679444,0.072  
10,14.678,rs2127598,0.067  
10,14.711,rs9663977,0.064  
10,14.737,rs12415117,0.062  
10,14.770,rs4551658,0.064  
10,14.892,rs7079674,0.047  
10,14.933,rs416990,0.047  
10,15.020,rs1498271,0.048  
10,15.079,rs11252619,0.030

10,15.085,rs17297024,0.029  
10,15.146,rs6601853,0.025  
10,15.169,rs313445,0.025  
10,15.193,rs313451,0.023  
10,15.194,rs313452,0.023  
10,15.225,rs10508287,0.027  
10,15.309,rs7080649,0.054  
10,15.318,rs433430,0.055  
10,15.352,rs10904321,0.060  
10,15.410,rs2397839,0.064  
10,15.424,rs12416000,0.064  
10,15.429,rs4146754,0.063  
10,15.447,rs2961618,0.062  
10,15.582,rs10795206,0.043  
10,15.658,rs4457653,0.037  
10,15.764,rs4323780,0.030  
10,15.957,rs12249281,0.026  
10,16.024,rs2211623,0.020  
10,16.065,rs6601900,0.016  
10,16.101,rs2801883,0.015  
10,16.523,rs7097810,0.004  
10,16.592,rs9423407,0.003  
10,16.627,rs7477268,0.001  
10,16.743,rs11253141,0.005  
10,16.748,rs10904487,0.005  
10,17.020,rs4078293,0.008  
10,17.042,rs4462243,0.007  
10,17.082,rs10904523,0.004  
10,17.135,rs12415024,0.002  
10,17.138,rs7922769,0.003  
10,17.164,rs4348801,0.012  
10,17.170,rs4881483,0.004  
10,17.175,rs12769978,0.004  
10,17.222,rs7075917,0.010  
10,17.250,rs4750500,0.011  
10,17.269,rs6602236,0.011  
10,17.317,rs4749861,0.012  
10,17.329,rs2386649,0.012  
10,17.365,rs3750640,0.016  
10,17.386,rs4750217,0.018  
10,17.540,rs2890365,0.013  
10,17.634,rs1567705,0.011  
10,17.885,rs3750657,0.008  
10,17.945,rs2296137,0.008  
10,18.004,rs646406,0.008  
10,18.013,rs2669130,0.008  
10,18.043,rs8177741,0.008  
10,18.058,rs2228059,0.007  
10,18.071,rs2296139,0.007  
10,18.072,rs8177685,0.007  
10,18.117,rs7904224,0.009  
10,18.120,rs6602360,0.009  
10,18.174,rs12244380,0.010  
10,18.234,rs7072398,0.011  
10,18.250,rs706780,0.012  
10,18.294,rs7072793,0.012  
10,18.323,rs4749955,0.013  
10,18.428,rs4750000,0.010  
10,18.438,rs4750005,0.010  
10,18.443,rs4310524,0.010  
10,18.446,rs7914915,0.010

10,18.547,rs616246,0.008  
10,18.548,rs11599872,0.008  
10,18.552,rs674430,0.008  
10,18.558,rs11257103,0.001  
10,18.571,rs647439,0.002  
10,18.589,rs637452,0.002  
10,18.590,rs11257188,0.002  
10,18.622,rs2516614,0.004  
10,18.633,rs756567,0.011  
10,18.646,rs1557111,0.016  
10,18.665,rs7071157,0.007  
10,18.666,rs3793721,0.007  
10,18.690,rs17152400,0.008  
10,18.703,rs7916923,0.008  
10,18.723,rs10508301,0.011  
10,18.752,rs12780002,0.022  
10,18.775,rs17152987,0.026  
10,18.870,rs2387396,0.039  
10,18.936,rs947470,0.021  
10,18.952,rs12570830,0.019  
10,18.983,rs4748026,0.015  
10,19.041,rs661985,0.023  
10,19.206,rs658230,0.054  
10,19.215,rs11597105,0.055  
10,19.264,rs4750531,0.054  
10,19.271,rs6602747,0.053  
10,19.284,rs1409876,0.051  
10,19.404,rs6602820,0.047  
10,19.415,rs10752356,0.045  
10,19.491,rs1556003,0.031  
10,19.524,rs9423942,0.038  
10,19.530,rs1327249,0.040  
10,19.662,rs2026628,0.032  
10,19.696,rs12358653,0.031  
10,19.702,rs2387595,0.031  
10,19.723,rs10444205,0.030  
10,19.739,rs1327689,0.028  
10,19.754,rs7912136,0.025  
10,19.810,rs2119984,0.016  
10,19.820,rs1992495,0.016  
10,19.830,rs3763958,0.016  
10,19.865,rs413721,0.016  
10,19.916,rs894453,0.017  
10,19.939,rs2439911,0.018  
10,20.084,rs10905035,0.022  
10,20.187,rs7081563,0.024  
10,20.200,rs11254854,0.024  
10,20.240,rs2486884,0.027  
10,20.254,rs9423753,0.027  
10,20.286,rs2501683,0.019  
10,20.322,rs11254889,0.024  
10,20.333,rs2490696,0.025  
10,20.377,rs946785,0.022  
10,20.404,rs10905076,0.022  
10,20.410,rs12415542,0.021  
10,20.462,rs1544156,0.013  
10,20.478,rs11254937,0.012  
10,20.550,rs11254958,0.002  
10,20.599,rs12357990,0.001  
10,20.683,rs6602225,-0.000  
10,20.730,rs10437543,0.000

10,20.777,rs755647,0.000  
10,20.791,rs2762567,0.000  
10,20.869,rs2497439,-0.000  
10,20.950,rs2692796,-0.003  
10,21.043,rs10905129,-0.000  
10,21.050,rs13376827,-0.000  
10,21.111,rs6602234,-0.000  
10,21.152,rs7101021,0.000  
10,21.154,rs12411681,0.000  
10,21.207,rs1409877,-0.000  
10,21.313,rs4083552,0.001  
10,21.395,rs12773344,0.000  
10,21.404,rs2253805,0.000  
10,21.505,rs873930,-0.000  
10,21.560,rs17136510,-0.000  
10,21.590,rs2050352,-0.000  
10,21.643,rs3824658,0.000  
10,21.670,rs10905190,0.003  
10,21.698,rs871049,0.007  
10,21.723,rs10752113,0.004  
10,21.735,rs7093342,0.002  
10,21.736,rs1931901,0.001  
10,21.814,rs11255267,0.014  
10,21.823,rs7094085,0.014  
10,21.861,rs7897216,0.017  
10,21.994,rs7907897,0.018  
10,22.019,rs3736968,0.018  
10,22.023,rs12761309,0.018  
10,22.196,rs6602275,0.018  
10,22.205,rs10905240,0.018  
10,22.390,rs407644,0.013  
10,22.462,rs768166,0.021  
10,22.497,rs418704,0.018  
10,22.529,rs578268,0.013  
10,22.534,rs10795588,0.012  
10,22.596,rs477461,0.013  
10,22.599,rs434645,0.012  
10,22.607,rs379568,0.014  
10,22.630,rs1244159,0.017  
10,22.638,rs1514232,0.017  
10,22.659,rs1149908,0.019  
10,22.718,rs2798832,0.010  
10,22.745,rs2664904,0.007  
10,22.839,rs10905315,0.007  
10,22.861,rs1416566,0.007  
10,23.053,rs10795608,0.001  
10,23.061,rs11599385,0.000  
10,23.158,rs10795618,0.000  
10,23.235,rs10508350,0.000  
10,23.251,rs2993391,0.000  
10,23.265,rs11814860,0.000  
10,23.336,rs9783189,-0.000  
10,23.407,rs2935669,-0.003  
10,23.418,rs2787136,-0.003  
10,23.434,rs2787138,-0.005  
10,23.440,rs2787141,-0.007  
10,23.482,rs1361153,-0.005  
10,23.503,rs2454062,-0.004  
10,23.714,rs10795645,-0.003  
10,23.774,rs11255728,-0.001  
10,23.901,rs4747803,-0.000



10,23.942,rs17144046,-0.000  
10,23.997,rs10905409,0.000  
10,24.110,rs6602329,0.000  
10,24.137,rs4584486,0.000  
10,24.341,rs1537603,-0.000  
10,24.580,rs10752149,-0.001  
10,24.869,rs2025758,-0.000  
10,24.930,rs1018729,-0.001  
10,24.960,rs1243413,-0.001  
10,24.977,rs1243403,-0.000  
10,25.084,rs827637,0.000  
10,25.401,rs961945,0.006  
10,25.459,rs1149926,0.009  
10,25.501,rs1242976,0.011  
10,25.572,rs12248193,0.014  
10,25.577,rs1149978,0.014  
10,25.807,rs4749872,0.015  
10,25.964,rs10508393,0.006  
10,26.004,rs12249391,0.006  
10,26.116,rs768365,0.009  
10,26.263,rs10752172,0.013  
10,26.553,rs1538608,0.019  
10,26.592,rs1339678,0.019  
10,26.748,rs6602387,0.023  
10,26.860,rs2762637,0.018  
10,26.935,rs2657513,0.021  
10,27.015,rs2398121,0.025  
10,27.036,rs11813494,0.026  
10,27.047,rs927507,0.027  
10,27.112,rs7083994,0.026  
10,27.135,rs1570411,0.025  
10,27.151,rs11256530,0.045  
10,27.155,rs1885740,0.048  
10,27.206,rs914987,0.058  
10,27.366,rs4747852,0.095  
10,27.439,rs7896031,0.110  
10,27.448,rs10508403,0.112  
10,27.516,rs1891399,0.111  
10,27.661,rs1924507,0.109  
10,27.696,rs4747860,0.105  
10,27.714,rs2247652,0.106  
10,27.731,rs2252120,0.103  
10,27.746,rs10905731,0.083  
10,27.774,rs10752197,0.054  
10,27.790,rs1324317,0.034  
10,27.790,rs7086168,0.044  
10,27.791,rs3847420,0.033  
10,27.798,rs3740194,0.030  
10,27.800,rs2653514,0.030  
10,27.881,rs4747900,0.022  
10,27.938,rs2279809,0.025  
10,28.016,rs4114417,0.018  
10,28.063,rs7901534,0.016  
10,28.069,rs12254063,0.018  
10,28.113,rs2379113,0.034  
10,28.141,rs3847437,0.037  
10,28.187,rs2499902,0.044  
10,28.227,rs1530375,0.042  
10,28.428,rs10905969,0.033  
10,28.533,rs754426,0.031  
10,28.650,rs7101132,0.029

10,28.674,rs10905983,0.029  
10,28.683,rs11257215,0.029  
10,28.741,rs10508428,0.016  
10,28.839,rs10795879,0.028  
10,28.949,rs2131265,0.031  
10,29.016,rs942531,0.028  
10,29.074,rs7893993,0.039  
10,29.229,rs11257408,0.057  
10,29.246,rs10795911,0.055  
10,29.305,rs7921794,0.037  
10,29.496,rs10795919,0.051  
10,29.828,rs2399786,0.038  
10,29.904,rs4747968,0.036  
10,30.049,rs10906115,0.036  
10,30.083,rs10752261,0.035  
10,30.112,rs2096396,0.034  
10,30.161,rs12251539,0.037  
10,30.170,rs10906128,0.038  
10,30.213,rs2997063,0.045  
10,30.306,rs4451621,0.044  
10,30.343,rs12254030,0.045  
10,30.345,rs1574114,0.045  
10,30.387,rs11111056,0.045  
10,30.433,rs11257794,0.064  
10,30.437,rs2768451,0.065  
10,30.439,rs11596121,0.065  
10,30.453,rs1108131,0.066  
10,30.543,rs7097560,0.041  
10,30.608,rs2815646,0.032  
10,30.636,rs10906164,0.026  
10,30.642,rs1126368,0.025  
10,30.656,rs2815633,0.023  
10,30.667,rs2768340,0.023  
10,30.698,rs1409961,0.022  
10,30.738,rs2895527,0.022  
10,30.750,rs2399880,0.030  
10,30.755,rs9787460,0.029  
10,30.845,rs10906189,0.017  
10,30.992,rs10906210,0.008  
10,31.038,rs723210,0.006  
10,31.070,rs4750255,0.003  
10,31.096,rs2493765,0.001  
10,31.142,rs2161365,0.000  
10,31.149,rs1644426,0.001  
10,31.167,rs2431626,0.001  
10,31.178,rs2431621,0.001  
10,31.286,rs17152417,0.001  
10,31.382,rs10795995,0.001  
10,31.675,rs17501439,0.001  
10,31.680,rs281851,0.001  
10,31.709,rs1888662,0.000  
10,31.711,rs17152523,0.000  
10,31.773,rs2580887,-0.000  
10,31.779,rs749062,-0.000  
10,31.785,rs10508452,-0.000  
10,31.872,rs11258111,-0.001  
10,31.920,rs7921121,-0.002  
10,31.964,rs565850,-0.001  
10,32.010,rs4409728,-0.001  
10,32.015,rs10796006,-0.001  
10,32.076,rs609445,0.000

10,32.086,rs10906289,0.000  
10,32.233,rs7921853,0.002  
10,32.242,rs1561570,0.006  
10,32.284,rs825411,0.005  
10,32.480,rs2274108,0.012  
10,32.507,rs10906320,0.014  
10,32.529,rs11258250,0.015  
10,32.566,rs727518,0.014  
10,32.607,rs3829925,0.006  
10,32.620,rs10906326,0.005  
10,32.622,rs2399957,0.005  
10,32.636,rs2025450,0.006  
10,32.664,rs472806,0.005  
10,32.745,rs4750340,0.004  
10,32.985,rs10906357,0.013  
10,33.034,rs1556992,0.014  
10,33.072,rs7087392,0.015  
10,33.092,rs1414397,0.015  
10,33.304,rs4237432,0.016  
10,33.396,rs2251555,0.016  
10,33.452,rs11819227,0.015  
10,33.466,rs10906399,0.015  
10,33.614,rs6602667,0.015  
10,33.754,rs4750390,0.014  
10,33.775,rs10508463,0.016  
10,33.829,rs943099,0.026  
10,33.845,rs7893899,0.016  
10,33.870,rs3814667,0.010  
10,33.895,rs9633782,0.004  
10,33.896,rs10906460,0.004  
10,33.923,rs4748054,0.004  
10,33.933,rs7910196,0.004  
10,33.953,rs10796127,0.005  
10,33.967,rs3995590,0.005  
10,33.995,rs10906498,0.004  
10,34.007,rs11258656,0.001  
10,34.025,rs7900034,0.001  
10,34.215,rs751498,0.001  
10,34.287,rs3235,0.000  
10,34.373,rs7904694,0.001  
10,34.400,rs1026580,0.001  
10,34.433,rs10906550,0.001  
10,34.479,rs2447027,0.000  
10,34.489,rs2457861,0.000  
10,34.689,rs2447015,0.001  
10,34.798,rs11258834,0.000  
10,34.884,rs11818968,0.000  
10,35.119,rs11258894,0.001  
10,35.243,rs11258918,0.003  
10,35.486,rs1218385,0.003  
10,35.575,rs1218343,0.003  
10,35.703,rs1218406,0.004  
10,35.760,rs7077526,0.006  
10,35.812,rs11259027,0.008  
10,35.815,rs7083480,0.008  
10,35.830,rs11819533,0.008  
10,35.847,rs7899569,0.012  
10,35.869,rs679295,0.014  
10,35.896,rs672589,0.015  
10,35.923,rs590830,0.012  
10,35.937,rs11259069,0.012

10,36.000,rs10906675,0.010  
10,36.281,rs11259186,0.002  
10,36.285,rs1409392,0.002  
10,36.285,rs17155499,0.002  
10,36.287,rs749232,0.000  
10,36.287,rs1409390,0.000  
10,36.293,rs717069,0.000  
10,36.303,rs3740114,0.000  
10,36.304,rs7903263,0.000  
10,36.304,rs10508481,-0.000  
10,36.308,rs10906742,-0.001  
10,36.310,rs12767375,-0.001  
10,36.315,rs2601736,-0.002  
10,36.324,rs2601751,-0.003  
10,36.328,rs7092449,-0.003  
10,36.332,rs1974068,-0.003  
10,36.333,rs11259333,-0.002  
10,36.334,rs927935,-0.002  
10,36.339,rs2688848,-0.005  
10,36.340,rs7091494,-0.005  
10,36.346,rs7094179,-0.005  
10,36.365,rs12572872,-0.004  
10,36.376,rs1592159,-0.003  
10,36.382,rs4276994,-0.002  
10,36.394,rs10906803,-0.001  
10,36.400,rs1935391,-0.001  
10,36.403,rs17156272,-0.001  
10,36.407,rs1041158,-0.001  
10,36.419,rs12250830,-0.001  
10,36.421,rs10737093,-0.001  
10,36.428,rs4750597,-0.001  
10,36.459,rs7072433,-0.001  
10,36.473,rs10906855,-0.002  
10,36.479,rs10906857,-0.002  
10,36.591,rs11816253,-0.000  
10,36.625,rs2138929,-0.000  
10,36.882,rs4750628,-0.002  
10,37.116,rs7079961,-0.006  
10,37.205,rs17156739,-0.006  
10,37.235,rs10508486,-0.007  
10,37.370,rs11818881,-0.002  
10,37.383,rs7075597,-0.002  
10,37.425,rs11259736,-0.003  
10,37.486,rs9333185,-0.003  
10,37.572,rs9333156,-0.004  
10,37.711,rs9333114,-0.004  
10,37.739,rs6602051,-0.004  
10,37.771,rs9333092,-0.004  
10,37.886,rs1934937,-0.006  
10,37.994,rs11253637,-0.004  
10,38.111,rs10904629,-0.004  
10,38.350,rs10752030,-0.001  
10,38.448,rs2354501,-0.001  
10,38.554,rs7079379,-0.001  
10,38.615,rs4747256,-0.001  
10,38.934,rs2994301,-0.000  
10,39.209,rs3858179,0.000  
10,39.333,rs10508506,0.000  
10,39.550,rs4748282,-0.000  
10,39.663,rs17138545,-0.000  
10,39.671,rs12774017,-0.000

10,39.860,rs10904747,-0.000  
10,39.964,rs7909832,0.005  
10,39.979,rs10904764,0.006  
10,40.040,rs12221081,0.006  
10,40.107,rs11254119,0.007  
10,40.113,rs11254123,0.007  
10,40.137,rs7088676,0.011  
10,40.143,rs7088378,0.013  
10,40.145,rs3847362,0.014  
10,40.164,rs7913448,0.021  
10,40.230,rs11812463,0.044  
10,40.250,rs7893556,0.051  
10,40.278,rs4748319,0.059  
10,40.342,rs17156937,0.059  
10,40.404,rs11254190,0.055  
10,40.473,rs3808925,0.051  
10,40.620,rs1801241,0.035  
10,40.695,rs780806,0.027  
10,40.801,rs11814420,0.023  
10,40.899,rs7072049,0.023  
10,40.921,rs1276711,0.023  
10,40.973,rs12246329,0.022  
10,40.986,rs7897550,0.021  
10,40.994,rs17431426,0.013  
10,40.995,rs12146414,0.013  
10,40.995,rs4525114,0.013  
10,41.089,rs1907360,0.007  
10,41.140,rs7905349,0.007  
10,41.184,rs10795445,0.007  
10,41.243,rs7916688,0.011  
10,41.244,rs932640,0.011  
10,41.306,rs6602180,0.010  
10,41.644,rs359285,0.013  
10,41.694,rs10904927,0.014  
10,41.758,rs359311,0.014  
10,41.848,rs4561106,0.009  
10,41.937,rs9423961,0.006  
10,41.940,rs12246926,0.006  
10,41.956,rs7075034,0.007  
10,41.971,rs7074210,0.014  
10,41.990,rs9787557,0.017  
10,42.008,rs4748380,0.023  
10,42.009,rs17448411,0.024  
10,42.037,rs7904413,0.014  
10,42.057,rs2357285,0.014  
10,42.114,rs17141430,0.013  
10,42.198,rs2688791,0.012  
10,42.205,rs12221,0.012  
10,42.228,rs1925554,0.012  
10,42.834,rs10508556,0.003  
10,42.851,rs7893618,0.003  
10,42.905,rs7920075,0.011  
10,42.941,rs1935499,0.011  
10,42.948,rs6415964,0.011  
10,42.966,rs10828244,0.012  
10,43.023,rs11012829,0.016  
10,43.056,rs1624525,0.026  
10,43.121,rs1757235,0.038  
10,43.127,rs11013137,0.037  
10,43.154,rs10828399,0.022  
10,43.174,rs7072759,0.021

10,43.233,rs9645525,0.014  
10,43.298,rs7078741,0.012  
10,43.310,rs12258178,0.012  
10,43.322,rs7477742,0.012  
10,43.331,rs10828662,0.012  
10,43.392,rs11014358,0.007  
10,43.484,rs8181477,0.010  
10,43.501,rs11014511,0.011  
10,43.514,rs12257556,0.012  
10,43.658,rs6482515,0.011  
10,43.860,rs1650,0.014  
10,44.261,rs10827035,0.045  
10,44.295,rs10763883,0.046  
10,44.404,rs1889513,0.049  
10,44.504,rs2496096,0.041  
10,44.510,rs7894610,0.039  
10,44.557,rs7094477,0.029  
10,44.586,rs12259974,0.022  
10,44.600,rs1332926,0.017  
10,44.634,rs7076844,0.016  
10,44.662,rs11010520,0.014  
10,44.784,rs12256082,0.010  
10,44.805,rs12775805,0.010  
10,44.810,rs7924250,0.009  
10,44.854,rs10508593,0.004  
10,44.860,rs1326242,0.003  
10,44.866,rs4747386,0.003  
10,44.899,rs2038912,0.002  
10,44.909,rs927827,0.003  
10,44.929,rs6482072,0.006  
10,44.943,rs10047272,0.006  
10,44.953,rs7079519,0.007  
10,44.965,rs7921016,0.008  
10,44.998,rs10827940,0.009  
10,45.018,rs12264569,0.009  
10,45.038,rs10458694,0.010  
10,45.099,rs7895512,0.012  
10,45.146,rs2778962,0.012  
10,45.181,rs6482112,0.012  
10,45.194,rs7070298,0.015  
10,45.206,rs1154689,0.016  
10,45.294,rs1416802,0.012  
10,45.358,rs7099358,0.011  
10,45.381,rs2359536,0.010  
10,45.396,rs1925533,0.010  
10,45.437,rs9645521,0.010  
10,45.476,rs11012310,0.010  
10,45.486,rs2765839,0.010  
10,45.607,rs952738,0.014  
10,45.625,rs2153446,0.011  
10,45.641,rs10508637,0.009  
10,45.654,rs11595730,0.012  
10,45.661,rs597837,0.014  
10,45.669,rs661924,0.017  
10,45.697,rs1440295,0.016  
10,45.720,rs313788,0.012  
10,45.766,rs1527042,0.009  
10,45.778,rs7099403,0.009  
10,45.815,rs10828224,0.013  
10,45.845,rs12358291,0.021  
10,45.847,rs11012639,0.021

10,45.900,rs12413399,0.020  
10,45.906,rs3858205,0.020  
10,46.224,rs11012847,0.014  
10,46.245,rs16922014,0.015  
10,46.385,rs3793753,0.027  
10,46.414,rs11013086,0.028  
10,46.420,rs1891877,0.028  
10,46.450,rs7918487,0.027  
10,46.580,rs12266732,0.037  
10,46.611,rs10828431,0.039  
10,46.657,rs10734046,0.044  
10,46.791,rs10828463,0.052  
10,47.108,rs11812868,0.039  
10,47.344,rs4748922,0.041  
10,47.347,rs7101307,0.041  
10,47.350,rs2366596,0.041  
10,47.357,rs11013842,0.040  
10,47.394,rs2067701,0.035  
10,47.418,rs12262912,0.033  
10,47.477,rs16924302,0.028  
10,47.544,rs11013944,0.030  
10,47.560,rs954729,0.029  
10,47.713,rs1543740,0.021  
10,47.798,rs373648,0.020  
10,47.823,rs387690,0.029  
10,47.851,rs11014020,0.030  
10,47.895,rs11014033,0.017  
10,47.896,rs17384657,0.017  
10,47.902,rs11014034,0.015  
10,47.915,rs220346,0.012  
10,47.940,rs11014059,0.016  
10,47.950,rs10828638,0.016  
10,48.134,rs7896427,0.018  
10,48.314,rs1556401,0.025  
10,48.329,rs7915144,0.024  
10,48.432,rs2366915,0.016  
10,48.552,rs10508674,0.027  
10,48.629,rs1537170,0.033  
10,48.703,rs10764472,0.039  
10,48.721,rs2067887,0.046  
10,48.734,rs10508679,0.045  
10,48.749,rs10828664,0.050  
10,48.767,rs11014147,0.046  
10,48.780,rs2265265,0.072  
10,48.839,rs10828681,0.058  
10,48.895,rs12219181,0.031  
10,48.949,rs1537900,0.017  
10,48.980,rs10741067,0.009  
10,49.009,rs1971470,0.006  
10,49.023,rs7916535,0.009  
10,49.045,rs7908585,0.008  
10,49.081,rs274288,0.006  
10,49.312,rs2491198,0.000  
10,49.342,rs824147,-0.005  
10,49.395,rs12265226,-0.004  
10,49.526,rs1329255,-0.002  
10,49.564,rs11591807,-0.002  
10,49.617,rs7911256,-0.001  
10,49.777,rs7091819,0.000  
10,49.781,rs2442826,0.001  
10,49.809,rs2442871,0.001

10,49.814,rs872974,0.000  
10,49.825,rs2442865,0.000  
10,49.877,rs2437408,0.000  
10,49.908,rs7071770,0.000  
10,50.004,rs11014866,0.000  
10,50.036,rs3824700,0.000  
10,50.211,rs11015040,0.003  
10,50.238,rs7073826,0.000  
10,50.247,rs3006843,-0.000  
10,50.318,rs4749118,-0.000  
10,50.570,rs3006835,-0.001  
10,50.624,rs7085145,-0.001  
10,50.644,rs786715,-0.001  
10,50.677,rs10508719,-0.001  
10,50.719,rs787033,-0.002  
10,50.734,rs7096662,-0.002  
10,50.736,rs12783959,-0.002  
10,50.778,rs787050,-0.012  
10,50.828,rs787016,-0.027  
10,50.881,rs7074426,-0.027  
10,50.948,rs1853682,-0.025  
10,51.031,rs11015249,-0.023  
10,51.075,rs17747622,-0.023  
10,51.114,rs17816509,-0.023  
10,51.242,rs4287252,-0.025  
10,51.299,rs2797930,-0.028  
10,51.568,rs10764687,-0.042  
10,51.589,rs7918793,-0.043  
10,51.601,rs10764690,-0.043  
10,51.662,rs2483499,-0.049  
10,51.747,rs237568,-0.050  
10,51.752,rs118917,-0.050  
10,51.847,rs10829268,-0.052  
10,51.880,rs1494209,-0.054  
10,51.887,rs10829284,-0.058  
10,51.906,rs2815523,-0.068  
10,52.023,rs10826354,-0.054  
10,52.070,rs7893462,-0.051  
10,52.215,rs7081654,-0.042  
10,52.667,rs786398,-0.046  
10,52.830,rs1249328,-0.048  
10,52.864,rs703027,-0.055  
10,52.920,rs1776099,-0.065  
10,52.923,rs7087410,-0.066  
10,52.931,rs9416795,-0.066  
10,52.934,rs2368327,-0.065  
10,52.944,rs11007106,-0.062  
10,52.959,rs16928895,-0.057  
10,52.978,rs2153299,-0.051  
10,53.013,rs2807741,-0.051  
10,53.509,rs628590,-0.056  
10,53.649,rs12569910,-0.070  
10,53.672,rs4749338,-0.058  
10,53.738,rs1248994,-0.049  
10,53.783,rs11007230,-0.044  
10,53.812,rs1265786,-0.048  
10,53.974,rs787346,-0.086  
10,54.005,rs7078596,-0.099  
10,54.096,rs7901873,-0.129  
10,54.139,rs12256310,-0.142  
10,54.169,rs1773881,-0.152



10,54.170,rs1691935,-0.152  
10,54.248,rs10826541,-0.168  
10,54.361,rs10508741,-0.184  
10,54.361,rs788065,-0.185  
10,54.501,rs1773877,-0.235  
10,54.546,rs2783425,-0.235  
10,54.558,rs788053,-0.235  
10,54.688,rs534145,-0.234  
10,54.726,rs7069400,-0.238  
10,54.785,rs573036,-0.250  
10,54.834,rs2783596,-0.265  
10,54.837,rs10508742,-0.266  
10,54.875,rs533844,-0.277  
10,54.930,rs571214,-0.311  
10,54.957,rs478463,-0.319  
10,55.005,rs576692,-0.331  
10,55.082,rs2532774,-0.334  
10,55.150,rs6481572,-0.362  
10,55.173,rs2532772,-0.372  
10,55.355,rs10763707,-0.385  
10,55.483,rs7076385,-0.391  
10,55.650,rs789920,-0.379  
10,55.687,rs7094201,-0.386  
10,55.923,rs7096453,-0.471  
10,55.924,rs17756919,-0.472  
10,55.925,rs1328326,-0.466  
10,55.926,rs4083633,-0.487  
10,55.926,rs2505903,-0.473  
10,55.926,rs1247442,-0.459  
10,55.927,rs1247459,-0.467  
10,55.929,rs1624281,-0.599  
10,55.929,rs1247087,-0.564  
10,55.929,rs7101204,-0.565  
10,55.929,rs1927456,-0.565  
10,55.929,rs11007716,-0.566  
10,55.939,rs1927461,-0.606  
10,56.069,rs1927443,-0.621  
10,56.148,rs2986971,-0.616  
10,56.166,rs7070647,-0.615  
10,56.195,rs6481636,-0.661  
10,56.235,rs11593046,-0.654  
10,56.471,rs3006564,-0.613  
10,56.632,rs2487930,-0.725  
10,56.641,rs11007823,-0.729  
10,56.730,rs2795622,-0.713  
10,56.737,rs16930868,-0.705  
10,56.924,rs2014144,-0.514  
10,57.022,rs2478833,-0.479  
10,57.275,rs11007909,-0.505  
10,57.327,rs3006509,-0.509  
10,57.454,rs1977583,-0.462  
10,57.712,rs1047991,-0.544  
10,57.844,rs1041677,-0.538  
10,57.867,rs12572092,-0.534  
10,57.874,rs2244677,-0.533  
10,58.037,rs1042058,-0.504  
10,58.215,rs603805,-0.460  
10,58.239,rs3124199,-0.454  
10,58.369,rs6481694,-0.400  
10,58.374,rs3105630,-0.399  
10,58.414,rs7067585,-0.396

10,58.442,rs906236,-0.392  
10,58.536,rs3123276,-0.371  
10,58.601,rs661893,-0.363  
10,58.836,rs7097635,-0.312  
10,59.020,rs4749600,-0.310  
10,59.068,rs2047142,-0.311  
10,59.127,rs903270,-0.321  
10,59.148,rs12247732,-0.318  
10,59.236,rs11008258,-0.318  
10,59.378,rs1538955,-0.313  
10,59.430,rs2994652,-0.312  
10,59.472,rs2994613,-0.311  
10,59.583,rs1690624,-0.308  
10,59.704,rs1624116,-0.316  
10,59.740,rs11008410,-0.319  
10,59.775,rs2505731,-0.322  
10,59.945,rs12781751,-0.339  
10,59.976,rs1418635,-0.368  
10,59.983,rs2277251,-0.367  
10,60.035,rs2808079,-0.379  
10,60.093,rs211315,-0.378  
10,60.095,rs1251370,-0.381  
10,60.096,rs1251379,-0.383  
10,60.107,rs425411,-0.398  
10,60.114,rs2998089,-0.407  
10,60.124,rs2998036,-0.418  
10,60.139,rs1080543,-0.417  
10,60.188,rs2490527,-0.432  
10,60.363,rs1187078,-0.351  
10,60.418,rs16934084,-0.345  
10,60.424,rs2506128,-0.339  
10,60.438,rs2474714,-0.337  
10,60.453,rs11593943,-0.327  
10,60.456,rs2073320,-0.323  
10,60.461,rs1952983,-0.324  
10,60.481,rs2065364,-0.350  
10,60.517,rs7074947,-0.356  
10,60.522,rs16934411,-0.357  
10,60.530,rs1320485,-0.357  
10,60.531,rs10740870,-0.321  
10,60.539,rs10763930,-0.316  
10,60.541,rs2776947,-0.314  
10,60.589,rs2804904,-0.309  
10,60.609,rs7903736,-0.317  
10,60.618,rs12569831,-0.329  
10,60.635,rs4623845,-0.351  
10,60.650,rs2601768,-0.368  
10,60.717,rs1902403,-0.479  
10,60.724,rs10827274,-0.492  
10,60.739,rs7908016,-0.507  
10,60.805,rs11009501,-0.525  
10,60.814,rs7096272,-0.523  
10,60.874,rs2777525,-0.504  
10,60.897,rs2812661,-0.496  
10,60.940,rs7905447,-0.508  
10,60.944,rs876644,-0.515  
10,60.953,rs1740721,-0.532  
10,60.974,rs10827315,-0.606  
10,60.982,rs7091513,-0.614  
10,61.003,rs1617306,-0.588  
10,61.007,rs11009607,-0.584

10,61.013,rs224714,-0.581  
10,61.043,rs161423,-0.558  
10,61.096,rs7893965,-0.529  
10,61.114,rs7076988,-0.536  
10,61.177,rs1660630,-0.594  
10,61.194,rs678188,-0.561  
10,61.302,rs2384211,-0.576  
10,61.350,rs4113505,-0.582  
10,61.593,rs10508810,-0.573  
10,61.692,rs4934517,-0.575  
10,61.716,rs7915550,-0.585  
10,61.748,rs4469833,-0.595  
10,61.768,rs10764014,-0.582  
10,62.101,rs2504361,-0.598  
10,62.148,rs4934750,-0.592  
10,62.287,rs2474755,-0.633  
10,62.296,rs1895119,-0.629  
10,62.330,rs596642,-0.602  
10,62.361,rs708419,-0.591  
10,62.432,rs3851074,-0.502  
10,62.531,rs11010532,-0.431  
10,62.531,rs2384564,-0.430  
10,62.556,rs7092191,-0.417  
10,62.587,rs315620,-0.409  
10,62.625,rs1219604,-0.406  
10,62.692,rs2800092,-0.385  
10,62.700,rs16936947,-0.384  
10,62.713,rs17615892,-0.383  
10,62.763,rs10827637,-0.366  
10,62.788,rs4934813,-0.333  
10,62.788,rs16936996,-0.333  
10,62.904,rs2483025,-0.360  
10,62.958,rs2505603,-0.372  
10,62.971,rs2990536,-0.378  
10,63.101,rs2027129,-0.407  
10,63.122,rs10508853,-0.411  
10,63.152,rs2490846,-0.412  
10,63.334,rs7904132,-0.402  
10,63.362,rs2505171,-0.401  
10,63.722,rs2253294,-0.413  
10,63.820,rs11011225,-0.421  
10,64.308,rs210271,-0.417  
10,64.361,rs10900250,-0.409  
10,64.396,rs158377,-0.403  
10,64.595,rs3121327,-0.370  
10,64.659,rs10900291,-0.366  
10,64.700,rs2565190,-0.367  
10,64.749,rs3026737,-0.397  
10,64.801,rs2505556,-0.447  
10,64.876,rs2503857,-0.458  
10,64.906,rs2503876,-0.456  
10,64.958,rs7070769,-0.448  
10,65.064,rs7915241,-0.391  
10,65.092,rs6593362,-0.376  
10,65.098,rs10899838,-0.374  
10,65.102,rs3123678,-0.407  
10,65.224,rs7922745,-0.387  
10,65.271,rs10899933,-0.380  
10,65.282,rs7895918,-0.379  
10,65.346,rs4948591,-0.383  
10,65.391,rs268319,-0.392

10,65.468,rs1704224,-0.418  
10,65.469,rs17155478,-0.418  
10,65.485,rs11238926,-0.424  
10,65.504,rs677465,-0.430  
10,65.567,rs1144484,-0.452  
10,65.568,rs7918046,-0.452  
10,65.591,rs1065297,-0.471  
10,65.609,rs1779384,-0.483  
10,65.681,rs4948636,-0.504  
10,65.701,rs7072122,-0.508  
10,65.708,rs7069446,-0.506  
10,65.722,rs10900072,-0.502  
10,65.771,rs7922897,-0.472  
10,65.797,rs999473,-0.462  
10,65.849,rs1408815,-0.470  
10,65.885,rs1963172,-0.454  
10,65.887,rs7911712,-0.454  
10,65.888,rs11239253,-0.453  
10,65.893,rs4948916,-0.449  
10,65.913,rs6593445,-0.434  
10,65.936,rs7909074,-0.465  
10,65.967,rs11597898,-0.469  
10,65.977,rs870204,-0.476  
10,65.986,rs3740098,-0.475  
10,66.039,rs12358699,-0.482  
10,66.128,rs7074191,-0.489  
10,66.168,rs1122801,-0.540  
10,66.222,rs7915972,-0.583  
10,66.397,rs4418752,-0.523  
10,66.400,rs10751384,-0.523  
10,67.440,rs11596854,-0.469  
10,67.842,rs4342964,-0.638  
10,67.848,rs17173564,-0.637  
10,67.856,rs7920146,-0.630  
10,67.869,rs4922519,-0.614  
10,67.913,rs762454,-0.562  
10,67.923,rs2853840,-0.556  
10,67.950,rs9421743,-0.558  
10,67.966,rs7895237,-0.559  
10,67.992,rs4922536,-0.558  
10,68.021,rs896570,-0.577  
10,68.046,rs7096703,-0.575  
10,68.052,rs2790937,-0.575  
10,68.065,rs998773,-0.575  
10,68.611,rs7898026,-0.617  
10,68.704,rs10508902,-0.631  
10,68.728,rs7093726,-0.631  
10,68.785,rs747532,-0.628  
10,68.810,rs877642,-0.597  
10,68.814,rs4320911,-0.589  
10,68.827,rs7915707,-0.566  
10,68.846,rs1822861,-0.656  
10,68.874,rs10219012,-0.697  
10,68.902,rs10857619,-0.720  
10,68.920,rs10508904,-0.699  
10,68.923,rs7072606,-0.697  
10,68.924,rs12416600,-0.695  
10,68.931,rs4838645,-0.693  
10,69.001,rs12248218,-0.659  
10,69.059,rs7098403,-0.685  
10,69.066,rs1913517,-0.688

10,69.078,rs17782114,-0.703  
10,69.081,rs2671705,-0.707  
10,69.127,rs7086917,-0.757  
10,69.240,rs10218995,-0.827  
10,69.270,rs10857437,-0.821  
10,69.304,rs2377991,-0.827  
10,69.322,rs2002392,-0.824  
10,69.324,rs4838470,-0.824  
10,69.325,rs11101062,-0.824  
10,69.339,rs12411581,-0.813  
10,69.359,rs6537521,-0.798  
10,69.367,rs6537523,-0.792  
10,69.367,rs2292200,-0.792  
10,69.417,rs3849153,-0.773  
10,69.458,rs10857488,-0.761  
10,69.473,rs7906303,-0.754  
10,69.544,rs11101168,-0.752  
10,69.550,rs1917804,-0.751  
10,69.567,rs4838392,-0.740  
10,69.571,rs17784350,-0.738  
10,69.582,rs8178992,-0.731  
10,69.624,rs6537552,-0.689  
10,69.917,rs2611512,-0.475  
10,69.942,rs10994675,-0.472  
10,69.950,rs17720205,-0.473  
10,69.957,rs7085433,-0.501  
10,70.061,rs10824914,-0.784  
10,70.070,rs3964873,-0.743  
10,70.070,rs3011710,-0.688  
10,70.237,rs7895606,-0.601  
10,70.296,rs4317935,-0.590  
10,70.368,rs6479812,-0.615  
10,70.371,rs7914943,-0.618  
10,70.506,rs10822288,-0.718  
10,70.520,rs7893773,-0.710  
10,70.603,rs10490975,-0.688  
10,70.633,rs2043556,-0.683  
10,70.635,rs10490969,-0.683  
10,70.641,rs12261736,-0.682  
10,70.642,rs7898516,-0.682  
10,70.669,rs211083,-0.646  
10,70.690,rs1550718,-0.617  
10,70.695,rs1189320,-0.611  
10,70.712,rs293233,-0.609  
10,70.739,rs12248673,-0.592  
10,70.780,rs10762176,-0.560  
10,70.783,rs1926208,-0.559  
10,70.859,rs10823243,-0.532  
10,70.874,rs1922139,-0.530  
10,70.894,rs7915186,-0.527  
10,70.991,rs4568954,-0.517  
10,71.093,rs1937701,-0.627  
10,71.093,rs17549153,-0.627  
10,71.196,rs1937672,-0.695  
10,71.287,rs10740403,-0.753  
10,71.324,rs1904036,-0.752  
10,71.424,rs7901487,-0.727  
10,71.493,rs10824010,-0.663  
10,71.517,rs1904024,-0.669  
10,71.540,rs10762562,-0.624  
10,71.659,rs11001056,-0.563

10,71.666,rs10824201,-0.561  
10,71.681,rs955779,-0.557  
10,71.839,rs11001444,-0.502  
10,71.848,rs7916242,-0.502  
10,71.867,rs11815205,-0.523  
10,71.881,rs1896368,-0.540  
10,72.013,rs1194663,-0.526  
10,72.017,rs12769610,-0.527  
10,72.069,rs6480851,-0.540  
10,72.113,rs1194742,-0.539  
10,72.132,rs1441119,-0.534  
10,72.307,rs6480894,-0.492  
10,72.350,rs10824650,-0.438  
10,72.429,rs7071467,-0.449  
10,72.429,rs10762857,-0.449  
10,72.440,rs1160630,-0.452  
10,72.480,rs1000219,-0.476  
10,72.522,rs4597018,-0.501  
10,72.656,rs10824804,-0.498  
10,72.685,rs7918389,-0.493  
10,72.688,rs6480972,-0.492  
10,72.799,rs10824829,-0.445  
10,72.841,rs2222547,-0.470  
10,72.847,rs2204345,-0.473  
10,72.859,rs12267008,-0.487  
10,72.874,rs10824839,-0.502  
10,72.883,rs12218966,-0.500  
10,72.887,rs10824840,-0.500  
10,72.940,rs2384101,-0.511  
10,72.942,rs2384130,-0.503  
10,72.977,rs11003466,-0.507  
10,73.000,rs7901256,-0.494  
10,73.012,rs10762971,-0.497  
10,73.035,rs885507,-0.500  
10,73.049,rs12411335,-0.504  
10,73.053,rs1487469,-0.505  
10,73.059,rs1198114,-0.507  
10,73.087,rs445739,-0.514  
10,73.118,rs12256830,-0.546  
10,73.150,rs1954343,-0.578  
10,73.213,rs16913796,-0.621  
10,73.240,rs2610895,-0.616  
10,73.375,rs7095441,-0.544  
10,73.516,rs7893808,-0.507  
10,73.641,rs4592338,-0.475  
10,73.729,rs4935107,-0.453  
10,73.774,rs2891522,-0.446  
10,73.816,rs1930177,-0.438  
10,73.861,rs1930146,-0.448  
10,73.872,rs1758827,-0.421  
10,73.879,rs1930165,-0.404  
10,73.904,rs10825357,-0.397  
10,73.905,rs12777241,-0.396  
10,73.955,rs7913327,-0.397  
10,73.993,rs10825369,-0.398  
10,74.014,rs11004437,-0.399  
10,74.067,rs10763126,-0.400  
10,74.167,rs2384533,-0.358  
10,74.251,rs7085479,-0.327  
10,74.260,rs7913159,-0.334  
10,74.261,rs11004610,-0.304

10,74.285,rs4935126,-0.324  
10,74.392,rs11004654,-0.304  
10,74.564,rs16907003,-0.302  
10,74.582,rs2799610,-0.274  
10,74.601,rs2589444,-0.314  
10,74.611,rs2680312,-0.335  
10,74.634,rs12265891,-0.340  
10,74.684,rs16907126,-0.339  
10,74.701,rs10509029,-0.336  
10,74.706,rs12252515,-0.334  
10,74.719,rs2249500,-0.324  
10,74.846,rs1992821,-0.234  
10,74.891,rs10160121,-0.225  
10,74.940,rs1922135,-0.224  
10,74.972,rs2153136,-0.213  
10,75.011,rs9415372,-0.199  
10,75.084,rs11005328,-0.193  
10,75.147,rs7474843,-0.187  
10,75.212,rs10763419,-0.185  
10,75.271,rs7919353,-0.174  
10,75.279,rs16910074,-0.173  
10,75.392,rs2393230,-0.157  
10,75.450,rs7900471,-0.152  
10,75.455,rs2127615,-0.128  
10,75.515,rs6481286,-0.103  
10,75.559,rs2393261,-0.089  
10,75.566,rs2393368,-0.088  
10,75.602,rs7087313,-0.079  
10,75.626,rs7082286,-0.072  
10,75.717,rs7101032,-0.049  
10,75.739,rs2658618,-0.045  
10,75.762,rs10509084,-0.051  
10,75.781,rs11006023,-0.047  
10,75.884,rs6481383,-0.030  
10,75.900,rs2275442,-0.028  
10,75.954,rs10826176,-0.021  
10,75.963,rs12245545,-0.021  
10,75.968,rs16912233,-0.022  
10,75.985,rs7916849,-0.024  
10,76.046,rs1649048,-0.022  
10,76.070,rs7097457,-0.031  
10,76.079,rs2028205,-0.037  
10,76.160,rs11812567,-0.061  
10,76.180,rs4948550,-0.084  
10,76.191,rs7910260,-0.099  
10,76.220,rs10826248,-0.058  
10,76.257,rs282661,-0.048  
10,76.388,rs10826264,-0.035  
10,77.738,rs2436571,-0.040  
10,77.842,rs284598,-0.040  
10,77.857,rs4495850,-0.039  
10,77.998,rs11006495,-0.032  
10,78.095,rs1763895,-0.025  
10,78.135,rs10826322,-0.023  
10,78.236,rs1177697,-0.027  
10,78.260,rs1171627,-0.039  
10,78.266,rs1171617,-0.042  
10,78.380,rs7088886,-0.041  
10,78.607,rs10821659,-0.049  
10,78.616,rs9888034,-0.037  
10,78.635,rs7893313,-0.042

10,78.686,rs11599447,-0.050  
10,78.700,rs10994212,-0.052  
10,78.708,rs10740011,-0.053  
10,78.746,rs10509125,-0.050  
10,78.784,rs6479700,-0.033  
10,78.788,rs4948398,-0.033  
10,79.019,rs7898622,-0.009  
10,79.139,rs10821808,-0.006  
10,79.231,rs11817236,-0.007  
10,79.272,rs3213077,-0.008  
10,79.274,rs1060373,-0.008  
10,79.276,rs2448358,-0.008  
10,79.306,rs6479734,-0.018  
10,79.317,rs2893863,-0.020  
10,79.318,rs10821845,-0.020  
10,79.331,rs4948267,-0.014  
10,79.354,rs7898435,-0.009  
10,79.362,rs2893869,-0.009  
10,79.363,rs12252953,-0.009  
10,79.379,rs7913287,-0.010  
10,79.499,rs12262459,-0.019  
10,79.511,rs7087951,-0.020  
10,79.656,rs11596067,-0.020  
10,79.668,rs4643025,-0.020  
10,79.670,rs10994701,-0.020  
10,80.363,rs2448396,-0.035  
10,80.440,rs1444466,-0.038  
10,80.442,rs2675651,-0.027  
10,80.485,rs12784097,-0.029  
10,80.517,rs7901348,-0.031  
10,80.530,rs10821932,-0.032  
10,80.558,rs10740055,-0.035  
10,80.570,rs12249208,-0.036  
10,80.604,rs7922024,-0.039  
10,80.610,rs7894504,-0.039  
10,80.616,rs12413946,-0.040  
10,80.643,rs224126,-0.044  
10,80.667,rs224149,-0.044  
10,80.823,rs10995356,-0.055  
10,80.888,rs10509178,-0.077  
10,80.924,rs10822109,-0.087  
10,80.978,rs2842276,-0.087  
10,81.198,rs10995495,-0.089  
10,81.340,rs12246496,-0.088  
10,81.464,rs10822186,-0.088  
10,81.538,rs16918762,-0.075  
10,81.615,rs3912164,-0.062  
10,81.645,rs10761805,-0.068  
10,81.668,rs938036,-0.072  
10,81.698,rs2252578,-0.077  
10,81.739,rs2671490,-0.046  
10,81.766,rs2252686,-0.044  
10,81.909,rs10995850,-0.066  
10,81.954,rs12769215,-0.069  
10,82.096,rs10509208,-0.063  
10,82.102,rs12243555,-0.062  
10,82.150,rs10822321,-0.021  
10,82.152,rs10509211,-0.023  
10,82.154,rs1915637,-0.025  
10,82.156,rs2177023,-0.021  
10,82.191,rs10822370,-0.035



10,82.229,rs10822431,-0.041  
10,82.269,rs7073035,-0.047  
10,82.283,rs9415825,-0.042  
10,82.290,rs1948853,-0.029  
10,82.290,rs7909330,-0.029  
10,82.319,rs10996448,-0.039  
10,82.414,rs7923690,-0.028  
10,82.429,rs7073641,-0.028  
10,82.566,rs10509229,-0.026  
10,82.616,rs10509233,-0.028  
10,82.617,rs10509234,-0.028  
10,82.617,rs4746528,-0.028  
10,82.677,rs1904740,-0.046  
10,82.709,rs2924301,-0.059  
10,82.790,rs7908509,-0.072  
10,82.822,rs10996759,-0.078  
10,82.850,rs10740214,-0.081  
10,82.862,rs1670148,-0.081  
10,82.970,rs1903876,-0.078  
10,82.976,rs7903919,-0.077  
10,82.994,rs1942007,-0.075  
10,83.287,rs7912066,-0.098  
10,83.288,rs7923361,-0.098  
10,83.348,rs4297361,-0.070  
10,83.420,rs1948946,-0.102  
10,83.421,rs13376837,-0.102  
10,83.502,rs10509267,-0.083  
10,83.531,rs10997232,-0.066  
10,83.535,rs2660020,-0.065  
10,83.573,rs2605503,-0.063  
10,83.573,rs10997260,-0.063  
10,83.590,rs12248142,-0.059  
10,83.612,rs2394279,-0.053  
10,83.615,rs10822869,-0.053  
10,83.630,rs6480203,-0.045  
10,83.645,rs10509276,-0.037  
10,83.662,rs7083773,-0.036  
10,83.674,rs6480209,-0.032  
10,83.685,rs7084050,-0.031  
10,83.725,rs12218365,-0.028  
10,83.726,rs7095347,-0.026  
10,83.749,rs4237311,-0.034  
10,83.752,rs10997408,-0.035  
10,83.759,rs7902209,-0.034  
10,83.763,rs9414948,-0.035  
10,83.763,rs4746645,-0.035  
10,83.835,rs1925562,-0.040  
10,83.850,rs942788,-0.042  
10,83.850,rs16923867,-0.055  
10,83.861,rs9971243,-0.052  
10,83.910,rs1925585,-0.039  
10,83.928,rs4745927,-0.050  
10,84.405,rs3125309,-0.053  
10,84.589,rs10997892,-0.029  
10,84.706,rs17456902,-0.010  
10,84.715,rs12221035,-0.004  
10,84.725,rs2673801,-0.001  
10,84.771,rs1673,-0.006  
10,84.787,rs7916697,-0.006  
10,85.092,rs1007042,-0.008  
10,85.409,rs2185653,-0.011

10,85.600,rs7903221,-0.015  
10,85.992,rs2998005,-0.025  
10,86.060,rs10509309,-0.017  
10,86.148,rs2805915,-0.017  
10,86.347,rs10998624,-0.017  
10,86.463,rs4746826,-0.017  
10,86.469,rs12221182,-0.012  
10,86.474,rs1983128,-0.013  
10,86.481,rs874556,-0.015  
10,86.499,rs7085830,-0.018  
10,86.539,rs2102339,-0.026  
10,86.635,rs10823333,-0.035  
10,86.638,rs10998700,-0.036  
10,86.641,rs2894081,-0.036  
10,86.643,rs7897621,-0.036  
10,86.715,rs7097078,-0.032  
10,86.736,rs12220752,-0.033  
10,86.750,rs906216,-0.034  
10,86.871,rs2084274,-0.040  
10,86.917,rs12244723,-0.040  
10,86.926,rs2278746,-0.040  
10,87.193,rs972570,-0.046  
10,87.260,rs1237105,-0.043  
10,87.291,rs2812562,-0.029  
10,87.317,rs190925,-0.020  
10,87.383,rs7895043,-0.012  
10,87.452,rs931028,-0.011  
10,87.465,rs4746874,-0.009  
10,87.565,rs2616076,-0.002  
10,87.580,rs2812510,-0.002  
10,87.587,rs7914685,-0.002  
10,87.651,rs2812531,-0.003  
10,87.698,rs2616133,-0.003  
10,87.808,rs2642589,-0.006  
10,87.848,rs2252324,-0.005  
10,87.878,rs2642576,-0.005  
10,87.954,rs17497293,-0.003  
10,87.999,rs1227756,-0.005  
10,88.005,rs1227759,-0.004  
10,88.032,rs3998144,-0.003  
10,88.045,rs10998997,-0.003  
10,88.075,rs2395286,-0.005  
10,88.077,rs2395280,-0.005  
10,88.115,rs2763359,-0.003  
10,88.151,rs7100913,-0.010  
10,88.158,rs2763366,-0.011  
10,88.324,rs3750776,-0.019  
10,88.347,rs3847355,-0.020  
10,88.664,rs10762337,-0.022  
10,88.702,rs10823484,-0.024  
10,88.707,rs2271696,-0.024  
10,88.892,rs6480445,-0.026  
10,89.015,rs7087773,-0.027  
10,89.048,rs6480448,-0.027  
10,89.110,rs7075666,-0.029  
10,89.183,rs4747001,-0.028  
10,89.211,rs10823529,-0.030  
10,89.433,rs7072552,-0.048  
10,89.438,rs10762381,-0.049  
10,89.485,rs1106887,-0.066  
10,89.599,rs10740351,-0.088

10,89.635,rs4747042,-0.091  
10,89.785,rs3740447,-0.125  
10,89.789,rs10999385,-0.126  
10,89.826,rs10740354,-0.126  
10,89.914,rs2894125,-0.137  
10,89.927,rs1556616,-0.138  
10,90.125,rs826460,-0.164  
10,90.366,rs10823602,-0.154  
10,90.480,rs10762401,-0.142  
10,90.560,rs2253801,-0.129  
10,90.572,rs16927963,-0.122  
10,90.599,rs1538677,-0.104  
10,90.836,rs16928023,-0.092  
10,90.979,rs7917828,-0.084  
10,90.990,rs7096028,-0.079  
10,91.003,rs17612029,-0.073  
10,91.041,rs7095462,-0.082  
10,91.050,rs12415816,-0.083  
10,91.109,rs12764441,-0.077  
10,91.205,rs10999616,-0.063  
10,91.254,rs7074431,-0.056  
10,91.273,rs10999632,-0.054  
10,91.274,rs12244234,-0.054  
10,91.320,rs10762417,-0.065  
10,91.322,rs7100223,-0.066  
10,91.352,rs7077129,-0.071  
10,91.383,rs7097900,-0.074  
10,91.468,rs947364,-0.061  
10,91.482,rs12246465,-0.062  
10,91.484,rs10999695,-0.062  
10,92.212,rs4746080,-0.079  
10,92.500,rs11593534,-0.106  
10,92.538,rs703256,-0.125  
10,92.607,rs16928777,-0.147  
10,92.663,rs2394795,-0.175  
10,92.724,rs10999828,-0.231  
10,92.732,rs10999834,-0.245  
10,92.750,rs7901112,-0.276  
10,92.827,rs7917660,-0.240  
10,92.838,rs12783388,-0.247  
10,92.839,rs10999868,-0.248  
10,92.862,rs10823781,-0.294  
10,92.897,rs10999882,-0.321  
10,92.922,rs3998531,-0.333  
10,92.923,rs12766154,-0.333  
10,93.013,rs2394834,-0.282  
10,93.050,rs7087554,-0.273  
10,93.084,rs10509334,-0.254  
10,93.131,rs16929266,-0.198  
10,93.150,rs12248205,-0.178  
10,93.169,rs7919533,-0.181  
10,93.217,rs2394840,-0.171  
10,93.235,rs11000020,-0.172  
10,93.305,rs10823873,-0.155  
10,93.325,rs7071860,-0.154  
10,93.342,rs7086624,-0.156  
10,93.372,rs4148912,-0.154  
10,93.453,rs11000152,-0.117  
10,93.488,rs1245548,-0.116  
10,93.609,rs6480598,-0.132  
10,93.615,rs12267836,-0.133

10,93.662,rs10740396,-0.139  
10,93.732,rs11000266,-0.151  
10,93.995,rs2675671,-0.187  
10,94.001,rs11000828,-0.160  
10,94.002,rs7091248,-0.157  
10,94.247,rs12360087,-0.108  
10,94.325,rs2488089,-0.100  
10,94.516,rs7901279,-0.094  
10,94.519,rs7918887,-0.093  
10,94.547,rs3088142,-0.093  
10,94.646,rs2488696,-0.092  
10,94.656,rs6480779,-0.094  
10,94.886,rs7895659,-0.134  
10,94.914,rs4745785,-0.132  
10,95.351,rs11001530,-0.098  
10,95.388,rs10762685,-0.102  
10,95.417,rs11001545,-0.106  
10,95.427,rs2057436,-0.108  
10,95.487,rs16932734,-0.122  
10,95.597,rs10824350,-0.132  
10,95.660,rs4745806,-0.135  
10,96.633,rs241,-0.182  
10,96.667,rs7913345,-0.182  
10,96.879,rs2082415,-0.165  
10,96.900,rs7093668,-0.164  
10,96.904,rs2116829,-0.164  
10,96.943,rs4980117,-0.231  
10,96.963,rs2116833,-0.277  
10,96.982,rs7915877,-0.336  
10,96.991,rs999995,-0.311  
10,96.998,rs11597111,-0.316  
10,97.037,rs11001968,-0.345  
10,97.136,rs7076995,-0.406  
10,97.209,rs2574807,-0.377  
10,97.212,rs10824493,-0.378  
10,97.224,rs527458,-0.380  
10,97.242,rs11002068,-0.377  
10,97.300,rs577360,-0.369  
10,97.309,rs499437,-0.367  
10,97.359,rs1516512,-0.339  
10,97.379,rs520887,-0.342  
10,97.492,rs42455,-0.355  
10,97.495,rs686374,-0.355  
10,97.502,rs10740466,-0.356  
10,97.502,rs10740467,-0.356  
10,97.506,rs35794,-0.357  
10,97.515,rs582449,-0.359  
10,97.519,rs10762759,-0.360  
10,97.624,rs4979892,-0.375  
10,97.657,rs734949,-0.342  
10,97.696,rs2619648,-0.330  
10,97.699,rs12254219,-0.335  
10,97.718,rs2619645,-0.357  
10,97.759,rs873740,-0.325  
10,97.760,rs11002284,-0.323  
10,98.112,rs1366047,-0.337  
10,98.311,rs2114907,-0.361  
10,98.350,rs1149750,-0.314  
10,98.361,rs1678632,-0.300  
10,98.403,rs11002452,-0.315  
10,98.404,rs2434123,-0.316

10,98.441,rs4979807,-0.315  
10,98.444,rs1649983,-0.319  
10,98.446,rs1863833,-0.322  
10,98.453,rs1720293,-0.324  
10,98.454,rs2913115,-0.333  
10,98.457,rs2913117,-0.320  
10,98.470,rs7088190,-0.327  
10,98.473,rs1720321,-0.293  
10,98.490,rs1109073,-0.297  
10,98.508,rs1916395,-0.338  
10,98.541,rs7074180,-0.332  
10,98.652,rs7894696,-0.271  
10,98.661,rs2248789,-0.271  
10,98.698,rs2570538,-0.268  
10,98.707,rs1369752,-0.267  
10,98.743,rs1811384,-0.251  
10,98.811,rs164247,-0.226  
10,98.872,rs1025558,-0.195  
10,98.918,rs1655629,-0.178  
10,98.944,rs1665568,-0.204  
10,99.064,rs4980001,-0.222  
10,99.071,rs3893270,-0.223  
10,99.113,rs11002643,-0.222  
10,99.154,rs7917285,-0.213  
10,99.249,rs638755,-0.192  
10,99.329,rs753384,-0.178  
10,99.356,rs1339481,-0.212  
10,99.429,rs531987,-0.219  
10,99.449,rs7084256,-0.229  
10,99.456,rs6480911,-0.232  
10,99.478,rs7901632,-0.240  
10,99.565,rs3802643,-0.249  
10,99.608,rs1961130,-0.283  
10,99.645,rs1269867,-0.260  
10,99.653,rs10824714,-0.265  
10,99.666,rs1092116,-0.275  
10,99.674,rs1628089,-0.281  
10,99.686,rs704004,-0.292  
10,99.745,rs7913964,-0.349  
10,99.762,rs703979,-0.361  
10,99.832,rs1782644,-0.374  
10,99.868,rs4979857,-0.378  
10,99.902,rs1250552,-0.396  
10,99.922,rs3740259,-0.401  
10,99.926,rs884889,-0.403  
10,99.940,rs11002928,-0.406  
10,99.997,rs7082045,-0.389  
10,100.008,rs4980069,-0.381  
10,100.012,rs10740498,-0.386  
10,100.052,rs11002969,-0.342  
10,100.091,rs6480945,-0.295  
10,100.116,rs12773500,-0.325  
10,100.306,rs1650169,-0.245  
10,100.677,rs1923541,-0.165  
10,100.888,rs12259239,-0.193  
10,100.899,rs1078524,-0.192  
10,100.955,rs1079242,-0.210  
10,101.092,rs1556897,-0.240  
10,101.104,rs4934028,-0.243  
10,101.113,rs1819684,-0.243  
10,101.324,rs17680430,-0.252

10,101.421,rs17681121,-0.257  
10,101.484,rs1878041,-0.259  
10,101.508,rs10881815,-0.284  
10,101.519,rs12414728,-0.285  
10,101.548,rs1913752,-0.251  
10,101.561,rs1913751,-0.204  
10,101.564,rs4934395,-0.190  
10,101.576,rs1913754,-0.162  
10,101.578,rs17637953,-0.157  
10,101.579,rs17107479,-0.156  
10,101.581,rs1989126,-0.154  
10,101.610,rs2161885,-0.124  
10,101.616,rs11186609,-0.118  
10,101.637,rs10881952,-0.092  
10,101.753,rs10882097,-0.048  
10,101.756,rs1702249,-0.047  
10,101.774,rs1019595,-0.046  
10,101.812,rs1911456,-0.044  
10,101.826,rs954405,-0.044  
10,101.860,rs735687,-0.045  
10,101.883,rs10786132,-0.047  
10,101.888,rs4545501,-0.044  
10,101.910,rs2345209,-0.027  
10,101.959,rs4511237,-0.028  
10,101.960,rs12357777,-0.028  
10,102.040,rs1336439,-0.028  
10,102.097,rs1997974,-0.017  
10,102.490,rs2103854,-0.017  
10,102.541,rs7906283,-0.017  
10,102.617,rs1543417,-0.013  
10,102.659,rs7922516,-0.010  
10,102.685,rs11191455,-0.009  
10,102.700,rs956429,-0.009  
10,102.913,rs7902158,-0.005  
10,103.108,rs4562759,-0.006  
10,103.149,rs11192502,-0.007  
10,103.176,rs1649947,-0.007  
10,103.193,rs1649934,-0.008  
10,103.259,rs12249088,-0.012  
10,103.299,rs10884361,-0.016  
10,103.561,rs652183,-0.043  
10,103.588,rs17100439,-0.060  
10,103.593,rs4586096,-0.048  
10,103.635,rs2644206,-0.067  
10,103.645,rs17100713,-0.070  
10,103.652,rs2644212,-0.073  
10,103.689,rs7099749,-0.074  
10,103.720,rs512064,-0.073  
10,103.737,rs489466,-0.073  
10,103.756,rs580298,-0.074  
10,103.901,rs7911623,-0.079  
10,103.935,rs17215403,-0.086  
10,103.957,rs11197830,-0.090  
10,104.007,rs6585295,-0.098  
10,104.055,rs10886221,-0.107  
10,104.204,rs1535847,-0.128  
10,104.638,rs1333846,-0.128  
10,104.689,rs581260,-0.128  
10,104.731,rs1041626,-0.133  
10,104.747,rs871954,-0.135  
10,104.769,rs1931144,-0.138

10,104.846,rs474974,-0.148  
10,104.921,rs11200461,-0.156  
10,105.004,rs509948,-0.157  
10,105.090,rs607428,-0.157  
10,105.108,rs7086916,-0.161  
10,105.161,rs12218819,-0.174  
10,105.237,rs4426079,-0.192  
10,105.417,rs1857459,-0.172  
10,105.536,rs11200757,-0.173  
10,105.659,rs2350106,-0.174  
10,105.716,rs4244944,-0.174  
10,105.723,rs11200843,-0.173  
10,105.758,rs17103143,-0.165  
10,105.802,rs7092674,-0.157  
10,105.840,rs4244950,-0.161  
10,106.022,rs17103593,-0.187  
10,106.059,rs2798074,-0.192  
10,106.070,rs2505765,-0.167  
10,106.082,rs2488647,-0.172  
10,106.087,rs11201124,-0.173  
10,106.125,rs11599612,-0.191  
10,106.140,rs10887348,-0.192  
10,106.157,rs2505777,-0.202  
10,106.199,rs10887363,-0.208  
10,106.233,rs10887382,-0.214  
10,106.258,rs1591315,-0.166  
10,106.278,rs7091418,-0.165  
10,106.341,rs12266096,-0.166  
10,106.464,rs4934071,-0.166  
10,106.601,rs7915322,-0.170  
10,106.639,rs2351335,-0.202  
10,106.697,rs1912282,-0.160  
10,106.735,rs4543926,-0.195  
10,106.751,rs1912305,-0.208  
10,106.756,rs869963,-0.210  
10,106.757,rs1912301,-0.210  
10,106.761,rs10887497,-0.212  
10,106.806,rs2280011,-0.212  
10,106.920,rs2140661,-0.247  
10,106.932,rs11201790,-0.246  
10,107.033,rs7073759,-0.238  
10,107.037,rs7895100,-0.238  
10,107.048,rs11201840,-0.256  
10,107.058,rs7090885,-0.274  
10,107.139,rs10887554,-0.277  
10,107.150,rs12358661,-0.284  
10,107.151,rs4934149,-0.285  
10,107.165,rs11201884,-0.273  
10,107.193,rs7921149,-0.267  
10,107.198,rs1317833,-0.237  
10,107.200,rs6586000,-0.229  
10,107.208,rs1870161,-0.198  
10,107.243,rs1896514,-0.176  
10,107.260,rs7070233,-0.174  
10,107.275,rs6586019,-0.171  
10,107.292,rs2803566,-0.179  
10,107.293,rs4934243,-0.178  
10,107.310,rs3858284,-0.170  
10,107.362,rs10887683,-0.170  
10,107.386,rs1240400,-0.162  
10,107.470,rs2296063,-0.188

10,107.543,rs7080675,-0.183  
10,107.794,rs11202426,-0.187  
10,107.856,rs7100988,-0.146  
10,107.871,rs7093316,-0.136  
10,107.909,rs791875,-0.120  
10,107.930,rs11202686,-0.097  
10,107.935,rs12220927,-0.090  
10,107.946,rs7095034,-0.089  
10,107.961,rs17110348,-0.107  
10,107.964,rs12776142,-0.111  
10,108.035,rs1035796,-0.099  
10,108.250,rs7918921,-0.091  
10,108.434,rs11202766,-0.085  
10,108.664,rs1432444,-0.085  
10,108.778,rs400659,-0.090  
10,108.898,rs3910679,-0.095  
10,108.971,rs1214546,-0.097  
10,109.000,rs11202881,-0.101  
10,109.001,rs2105436,-0.101  
10,109.032,rs12244713,-0.108  
10,109.037,rs4481939,-0.109  
10,109.087,rs1317361,-0.107  
10,109.106,rs17380969,-0.107  
10,109.197,rs7908760,-0.111  
10,109.208,rs2071510,-0.111  
10,109.213,rs885561,-0.110  
10,109.223,rs11203047,-0.114  
10,109.230,rs6586179,-0.117  
10,109.261,rs7068816,-0.125  
10,109.391,rs304478,-0.078  
10,109.404,rs303211,-0.079  
10,109.489,rs17122322,-0.089  
10,109.531,rs7087280,-0.094  
10,109.537,rs7917083,-0.078  
10,109.543,rs7076750,-0.081  
10,109.555,rs12254170,-0.088  
10,109.576,rs12573820,-0.098  
10,109.610,rs7079873,-0.116  
10,109.616,rs2038921,-0.115  
10,109.887,rs10881684,-0.132  
10,109.919,rs10785908,-0.109  
10,109.942,rs10785914,-0.103  
10,110.040,rs9919479,-0.065  
10,110.049,rs7084035,-0.061  
10,110.196,rs4933174,-0.044  
10,110.239,rs7905491,-0.038  
10,110.297,rs1329169,-0.029  
10,110.304,rs2480268,-0.030  
10,110.368,rs10219117,-0.023  
10,110.429,rs11186122,-0.014  
10,110.458,rs1540997,-0.006  
10,110.462,rs7898091,-0.006  
10,110.512,rs12355470,-0.005  
10,110.530,rs10785957,-0.005  
10,110.619,rs1274352,-0.006  
10,110.694,rs17097279,-0.011  
10,110.731,rs1274411,-0.009  
10,110.742,rs10881838,-0.009  
10,110.984,rs10785976,-0.014  
10,110.986,rs7905809,-0.014  
10,111.220,rs934901,-0.035



10,111.256,rs3910157,-0.038  
10,111.408,rs3852502,-0.053  
10,111.495,rs12572050,-0.048  
10,111.509,rs1431864,-0.048  
10,111.519,rs7088963,-0.071  
10,111.520,rs7098281,-0.074  
10,111.528,rs7098577,-0.098  
10,111.537,rs10748558,-0.116  
10,111.540,rs6583759,-0.121  
10,111.561,rs10509625,-0.136  
10,111.567,rs2255188,-0.139  
10,111.568,rs10748559,-0.150  
10,111.624,rs11186596,-0.147  
10,111.626,rs17472998,-0.147  
10,111.632,rs11186608,-0.147  
10,111.646,rs2149825,-0.137  
10,111.672,rs4551673,-0.137  
10,111.699,rs1361552,-0.136  
10,111.735,rs7919192,-0.123  
10,111.968,rs7086285,-0.088  
10,112.362,rs12778642,-0.044  
10,112.631,rs7095772,-0.042  
10,112.643,rs17107977,-0.042  
10,112.801,rs835262,-0.035  
10,112.876,rs2068888,-0.032  
10,112.986,rs10786074,-0.022  
10,113.038,rs913419,-0.021  
10,113.059,rs1927463,-0.021  
10,113.090,rs1927465,-0.020  
10,113.151,rs2797559,-0.017  
10,113.189,rs2761331,-0.017  
10,113.197,rs11596560,-0.020  
10,113.216,rs1609572,-0.028  
10,113.281,rs787650,-0.043  
10,113.300,rs696179,-0.046  
10,113.319,rs701864,-0.048  
10,113.459,rs947599,-0.047  
10,113.568,rs11187515,-0.044  
10,113.614,rs11187533,-0.044  
10,113.653,rs3758538,-0.045  
10,113.665,rs1108197,-0.045  
10,113.735,rs487161,-0.042  
10,113.883,rs10882306,-0.042  
10,114.025,rs10509664,-0.025  
10,114.092,rs4531389,-0.019  
10,114.135,rs12779373,-0.019  
10,114.140,rs1416757,-0.019  
10,114.523,rs12768993,-0.035  
10,114.681,rs1935960,-0.032  
10,114.682,rs1935961,-0.032  
10,114.689,rs7921117,-0.033  
10,114.904,rs17416616,-0.048  
10,114.915,rs7911571,-0.048  
10,115.050,rs1776946,-0.041  
10,115.204,rs10882470,-0.016  
10,115.291,rs4917623,-0.009  
10,115.343,rs7921420,-0.007  
10,115.380,rs12769370,-0.025  
10,115.382,rs3740508,-0.026  
10,115.385,rs12761915,-0.027  
10,115.391,rs7904853,-0.023

10,115.441,rs7907756,-0.019  
10,115.504,rs4917690,-0.009  
10,115.520,rs1571131,-0.008  
10,115.528,rs1326935,-0.008  
10,115.551,rs1326934,-0.007  
10,115.563,rs1536442,-0.007  
10,115.628,rs7905711,-0.012  
10,115.657,rs11188409,-0.012  
10,115.714,rs10748638,-0.011  
10,115.790,rs4582902,-0.010  
10,115.990,rs17111253,-0.011  
10,116.018,rs7923326,-0.011  
10,116.135,rs1172962,-0.019  
10,116.173,rs10509702,-0.023  
10,116.217,rs2290714,-0.027  
10,116.219,rs7911684,-0.027  
10,116.238,rs727852,-0.046  
10,116.262,rs10882763,-0.042  
10,116.383,rs2093558,-0.045  
10,116.445,rs7078493,-0.042  
10,116.453,rs2154203,-0.041  
10,116.507,rs10882807,-0.041  
10,116.601,rs7906985,-0.043  
10,116.661,rs11188880,-0.033  
10,116.712,rs1436187,-0.035  
10,116.810,rs4919054,-0.044  
10,116.841,rs9420695,-0.046  
10,116.845,rs12412871,-0.046  
10,116.885,rs1172377,-0.048  
10,117.232,rs17112245,-0.060  
10,117.490,rs7098931,-0.068  
10,117.601,rs902467,-0.070  
10,117.620,rs2817666,-0.055  
10,117.741,rs11599228,-0.057  
10,117.744,rs2275580,-0.057  
10,117.805,rs2152092,-0.056  
10,117.879,rs12259524,-0.055  
10,117.889,rs7093643,-0.054  
10,117.896,rs1105999,-0.053  
10,117.903,rs933057,-0.051  
10,117.950,rs10786364,-0.046  
10,118.014,rs17108375,-0.037  
10,118.052,rs7080894,-0.035  
10,118.085,rs7095551,-0.034  
10,118.129,rs12251897,-0.033  
10,118.137,rs10882999,-0.032  
10,118.140,rs11189381,-0.032  
10,118.141,rs4917787,-0.032  
10,118.217,rs17108583,-0.020  
10,118.276,rs11189416,-0.015  
10,118.284,rs531676,-0.017  
10,118.303,rs522540,-0.020  
10,118.311,rs510393,-0.020  
10,118.381,rs4917793,-0.008  
10,118.412,rs556474,-0.004  
10,118.698,rs10883039,-0.005  
10,118.912,rs11189510,-0.013  
10,119.076,rs10883059,-0.020  
10,119.134,rs11189551,-0.021  
10,119.163,rs11189555,-0.026  
10,119.183,rs12264514,-0.030

10,119.186,rs11189563,-0.030  
10,119.200,rs4919218,-0.037  
10,119.228,rs17109539,-0.038  
10,119.242,rs2147896,-0.038  
10,119.303,rs11189619,-0.028  
10,119.311,rs1998756,-0.027  
10,119.321,rs7918490,-0.027  
10,119.391,rs535182,-0.023  
10,119.403,rs3853516,-0.023  
10,119.421,rs502195,-0.022  
10,119.627,rs2862447,-0.038  
10,119.802,rs11596018,-0.038  
10,120.007,rs12573571,-0.048  
10,120.009,rs12764454,-0.048  
10,120.109,rs2278842,-0.037  
10,120.141,rs3844556,-0.035  
10,120.148,rs603424,-0.031  
10,120.208,rs735877,-0.013  
10,120.266,rs570844,-0.015  
10,120.713,rs1110286,-0.039  
10,120.735,rs7068072,-0.038  
10,120.755,rs4919478,-0.038  
10,120.807,rs12254876,-0.049  
10,120.885,rs12773509,-0.032  
10,120.929,rs912478,-0.028  
10,120.938,rs4919504,-0.028  
10,120.945,rs10883547,-0.040  
10,120.952,rs12248258,-0.040  
10,120.979,rs11190747,-0.044  
10,120.997,rs10883563,-0.046  
10,121.052,rs11190780,-0.054  
10,121.111,rs967201,-0.064  
10,121.204,rs10748804,-0.074  
10,121.215,rs807043,-0.076  
10,121.263,rs1361265,-0.081  
10,121.297,rs12415670,-0.087  
10,121.325,rs4917928,-0.087  
10,121.413,rs1556862,-0.075  
10,121.421,rs11598564,-0.076  
10,121.598,rs621106,-0.095  
10,121.609,rs3802727,-0.095  
10,121.941,rs6584453,-0.055  
10,122.053,rs17777943,-0.050  
10,122.126,rs17114406,-0.049  
10,122.130,rs7897,-0.049  
10,122.156,rs7083450,-0.048  
10,122.182,rs17114433,-0.045  
10,122.224,rs11191274,-0.041  
10,122.225,rs1057050,-0.040  
10,122.231,rs7897947,-0.040  
10,122.253,rs927821,-0.040  
10,122.256,rs11191291,-0.040  
10,122.259,rs7075281,-0.040  
10,122.320,rs17114803,-0.041  
10,122.397,rs7922982,-0.049  
10,122.433,rs11191666,-0.054  
10,122.446,rs11598673,-0.055  
10,122.464,rs3014188,-0.057  
10,122.478,rs6584555,-0.056  
10,122.514,rs7068081,-0.055  
10,122.610,rs3781347,-0.044

10,122.716,rs2047036,-0.045  
10,122.809,rs2073341,-0.056  
10,122.833,rs10786770,-0.063  
10,122.849,rs10883931,-0.051  
10,122.857,rs2067832,-0.050  
10,122.885,rs2864004,-0.059  
10,122.889,rs10883953,-0.060  
10,122.922,rs805721,-0.066  
10,122.971,rs10748861,-0.078  
10,122.974,rs642743,-0.081  
10,122.983,rs10883979,-0.085  
10,123.040,rs7095770,-0.110  
10,123.056,rs7908698,-0.114  
10,123.060,rs10786792,-0.114  
10,123.061,rs1565415,-0.090  
10,123.118,rs745947,-0.076  
10,123.147,rs1490171,-0.070  
10,123.249,rs10786828,-0.066  
10,123.563,rs2418774,-0.057  
10,123.881,rs556646,-0.059  
10,124.045,rs11192698,-0.066  
10,124.133,rs472664,-0.067  
10,124.154,rs12360303,-0.068  
10,124.196,rs2150604,-0.051  
10,124.208,rs12251422,-0.048  
10,124.291,rs952965,-0.029  
10,124.310,rs12217685,-0.025  
10,124.323,rs12262411,-0.022  
10,124.330,rs12412964,-0.021  
10,124.341,rs11192931,-0.022  
10,124.366,rs2181019,-0.029  
10,124.394,rs11814145,-0.031  
10,124.462,rs821950,-0.034  
10,124.489,rs10748924,-0.035  
10,124.621,rs11193065,-0.045  
10,124.721,rs1004921,-0.052  
10,124.723,rs7095894,-0.053  
10,124.790,rs10786998,-0.060  
10,124.905,rs950809,-0.049  
10,124.938,rs10884409,-0.051  
10,124.960,rs7901596,-0.056  
10,124.987,rs7073924,-0.063  
10,124.996,rs4918282,-0.052  
10,125.015,rs669061,-0.099  
10,125.136,rs17284802,-0.121  
10,125.240,rs12416679,-0.123  
10,125.811,rs12766593,-0.127  
10,125.854,rs10748948,-0.127  
10,125.884,rs7072807,-0.100  
10,125.895,rs1902728,-0.082  
10,125.945,rs2243561,-0.072  
10,125.947,rs2026777,-0.073  
10,125.948,rs11193711,-0.075  
10,125.956,rs12768215,-0.109  
10,125.962,rs12768320,-0.114  
10,125.963,rs7067538,-0.115  
10,126.024,rs7920282,-0.090  
10,126.031,rs7897681,-0.088  
10,126.090,rs11193901,-0.083  
10,126.101,rs1936488,-0.083  
10,126.153,rs12359500,-0.080

10,126.197,rs1411023,-0.081  
10,126.293,rs7922237,-0.049  
10,126.300,rs11194176,-0.057  
10,126.304,rs2482594,-0.063  
10,126.514,rs723483,-0.044  
10,126.539,rs7904064,-0.037  
10,126.568,rs12249259,-0.031  
10,126.692,rs7072754,-0.010  
10,126.705,rs1541130,-0.009  
10,126.758,rs10884796,-0.007  
10,126.822,rs12354938,-0.005  
10,127.395,rs12358885,-0.003  
10,127.456,rs2501574,-0.003  
10,127.568,rs12573269,-0.002  
10,127.755,rs2027126,-0.000  
10,127.787,rs2168741,-0.000  
10,127.796,rs12246208,-0.000  
10,127.844,rs7098940,-0.001  
10,127.847,rs10884961,-0.001  
10,127.859,rs10444086,-0.001  
10,127.866,rs1541050,-0.001  
10,127.892,rs10884971,-0.001  
10,127.962,rs1889568,-0.001  
10,128.088,rs7898064,-0.001  
10,128.106,rs4350299,-0.001  
10,128.126,rs11195244,-0.001  
10,128.244,rs4631816,-0.000  
10,128.295,rs2078243,0.000  
10,128.323,rs12356300,0.000  
10,128.331,rs2146548,0.002  
10,128.378,rs7073243,0.006  
10,128.422,rs1407696,0.003  
10,128.671,rs6585131,0.014  
10,128.696,rs7923493,0.015  
10,128.816,rs2419601,0.015  
10,128.887,rs2804609,0.011  
10,128.901,rs2804616,0.011  
10,128.953,rs2803594,0.009  
10,129.025,rs10749108,0.007  
10,129.237,rs943264,0.000  
10,129.238,rs11195874,0.000  
10,129.298,rs7896275,0.002  
10,129.400,rs17129748,0.004  
10,129.428,rs6585185,0.004  
10,129.475,rs4918769,0.004  
10,129.510,rs4918773,0.005  
10,129.520,rs7915497,0.005  
10,129.579,rs7903017,0.004  
10,129.666,rs4917637,0.001  
10,129.909,rs11196152,-0.000  
10,130.093,rs7903146,-0.001  
10,130.218,rs10885410,-0.006  
10,130.219,rs7919409,-0.006  
10,130.220,rs7100388,-0.006  
10,130.284,rs7085532,-0.004  
10,130.356,rs3814573,-0.001  
10,130.368,rs7903424,-0.001  
10,130.381,rs176632,-0.001  
10,130.383,rs1555485,-0.001  
10,130.384,rs1028629,-0.001  
10,130.657,rs2788178,-0.020

10,130.754,rs11196304,-0.027  
10,130.774,rs7093035,-0.034  
10,130.807,rs11196312,-0.031  
10,130.921,rs7895990,-0.041  
10,130.941,rs1394495,-0.042  
10,131.050,rs6585225,-0.043  
10,131.103,rs7088233,-0.044  
10,131.154,rs11575634,-0.042  
10,131.173,rs2419840,-0.049  
10,131.257,rs3127084,-0.033  
10,131.311,rs3121478,-0.035  
10,131.505,rs4394799,-0.039  
10,131.604,rs10509985,-0.040  
10,131.659,rs7084835,-0.041  
10,131.680,rs10509990,-0.041  
10,131.821,rs17775854,-0.041  
10,131.828,rs1576479,-0.041  
10,131.860,rs151598,-0.033  
10,131.874,rs7894582,-0.035  
10,131.880,rs180950,-0.054  
10,131.955,rs1411407,-0.042  
10,131.959,rs10490907,-0.041  
10,131.988,rs238753,-0.038  
10,132.018,rs2782979,-0.034  
10,132.497,rs2420054,-0.046  
10,132.530,rs597371,-0.046  
10,132.604,rs539946,-0.050  
10,132.631,rs1889449,-0.051  
10,132.689,rs507098,-0.050  
10,132.946,rs1334469,-0.048  
10,133.035,rs10787526,-0.038  
10,133.067,rs493347,-0.036  
10,133.328,rs7075375,-0.028  
10,133.414,rs941853,-0.022  
10,133.699,rs2475228,-0.012  
10,134.198,rs11196793,-0.005  
10,134.280,rs7914325,-0.003  
10,134.295,rs11196799,-0.003  
10,134.393,rs11196810,-0.002  
10,134.582,rs7893317,-0.001  
10,134.664,rs4751639,-0.001  
10,134.968,rs17093295,-0.001  
10,134.985,rs2804192,-0.001  
10,135.397,rs10490916,-0.000  
10,135.707,rs3740571,0.000  
10,135.715,rs4751939,0.000  
10,135.754,rs180723,-0.000  
10,135.937,rs7071452,0.001  
10,135.980,rs10490904,0.003  
10,135.983,rs2694773,0.005  
10,135.987,rs3901216,0.009  
10,135.996,rs2530343,0.012  
10,136.084,rs3781532,-0.000  
10,136.177,rs11197571,0.000  
10,136.180,rs7909875,0.000  
10,136.361,rs2532689,-0.000  
10,136.582,rs17094643,-0.004  
10,136.600,rs17734465,-0.004  
10,136.645,rs17094705,-0.005  
10,136.682,rs10885935,-0.006  
10,136.819,rs4751986,-0.017

10,136.940,rs3010494,-0.031  
10,136.993,rs2305206,-0.062  
10,137.004,rs3781564,-0.065  
10,137.063,rs10885995,-0.057  
10,137.115,rs1867987,-0.067  
10,137.117,rs880887,-0.068  
10,137.119,rs880977,-0.068  
10,137.249,rs758367,-0.083  
10,137.318,rs1665676,-0.081  
10,137.350,rs1900501,-0.080  
10,137.418,rs11596422,-0.072  
10,137.452,rs10787735,-0.071  
10,137.500,rs12766760,-0.067  
10,137.597,rs716183,-0.046  
10,137.621,rs1638438,-0.057  
10,137.666,rs2619105,-0.069  
10,137.705,rs363221,-0.079  
10,137.706,rs363251,-0.079  
10,137.737,rs2532812,-0.081  
10,137.786,rs181440,-0.082  
10,137.790,rs17096145,-0.083  
10,137.856,rs1638662,-0.111  
10,137.861,rs181499,-0.112  
10,137.877,rs2794427,-0.110  
10,137.881,rs452035,-0.108  
10,137.928,rs451123,-0.065  
10,137.931,rs2420459,-0.064  
10,137.957,rs12570134,-0.054  
10,137.997,rs242959,-0.039  
10,137.998,rs181585,-0.039  
10,138.007,rs7358112,-0.037  
10,138.013,rs181623,-0.036  
10,138.249,rs855992,-0.059  
10,138.315,rs12770749,-0.050  
10,138.317,rs703405,-0.050  
10,138.503,rs12218538,-0.048  
10,138.622,rs1024265,-0.030  
10,138.647,rs6585456,-0.028  
10,138.760,rs1006286,-0.009  
10,138.805,rs1925280,-0.006  
10,138.861,rs7476605,-0.001  
10,138.958,rs11198112,-0.000  
10,139.011,rs729465,-0.000  
10,139.049,rs6585463,0.000  
10,139.137,rs1925265,-0.000  
10,139.165,rs17641472,0.000  
10,139.173,rs2147741,0.000  
10,139.281,rs11198167,-0.001  
10,139.300,rs1936298,-0.001  
10,139.521,rs7069291,-0.002  
10,139.579,rs1797,-0.002  
10,140.222,rs703424,-0.000  
10,140.274,rs1577074,-0.001  
10,140.359,rs984428,-0.002  
10,140.414,rs6585481,-0.002  
10,140.483,rs236212,-0.004  
10,140.553,rs853943,-0.005  
10,140.606,rs1970582,-0.005  
10,140.623,rs874231,-0.005  
10,140.653,rs11198439,-0.005  
10,140.670,rs12263039,-0.005

10,140.692,rs11198458,-0.004  
10,140.771,rs17097793,-0.002  
10,140.837,rs1766253,-0.001  
10,140.952,rs873598,0.000  
10,141.140,rs11813458,0.011  
10,141.182,rs11596456,0.011  
10,141.205,rs751973,0.009  
10,141.266,rs10510050,0.005  
10,141.286,rs7098706,0.008  
10,141.384,rs943271,0.022  
10,141.402,rs943269,0.024  
10,141.439,rs12242686,0.027  
10,141.560,rs10886375,0.028  
10,141.693,rs6585536,0.025  
10,141.714,rs2275111,0.027  
10,141.776,rs10510054,0.035  
10,141.814,rs7093673,0.032  
10,141.821,rs17606354,0.032  
10,141.890,rs928670,0.030  
10,141.947,rs871196,0.030  
10,142.020,rs17098766,0.037  
10,142.071,rs10886471,0.042  
10,142.131,rs10886487,0.042  
10,142.134,rs3009874,0.042  
10,142.150,rs756279,0.043  
10,142.164,rs4752324,0.043  
10,142.198,rs12569630,0.042  
10,142.363,rs7091662,0.026  
10,142.369,rs1008727,0.026  
10,142.736,rs2456709,0.021  
10,142.895,rs17099385,0.019  
10,142.995,rs10886553,0.018  
10,143.162,rs4288683,0.024  
10,143.294,rs7894011,0.028  
10,143.295,rs10788037,0.029  
10,143.296,rs10788038,0.027  
10,143.390,rs6585586,0.024  
10,143.578,rs1999414,0.022  
10,143.580,rs2026959,0.022  
10,143.751,rs3847499,0.020  
10,143.807,rs997856,0.016  
10,143.871,rs10788079,0.014  
10,143.886,rs7913921,0.012  
10,143.911,rs7068076,0.011  
10,143.953,rs2463147,0.009  
10,143.981,rs7894236,0.004  
10,144.023,rs12770951,0.005  
10,144.065,rs7910507,0.005  
10,144.070,rs4752432,0.005  
10,144.095,rs12243885,0.005  
10,144.103,rs11592655,0.005  
10,144.131,rs11199430,0.004  
10,144.147,rs2420783,0.004  
10,144.167,rs2901256,0.001  
10,144.182,rs7068008,0.002  
10,144.247,rs4751798,0.009  
10,144.266,rs6585658,0.010  
10,144.294,rs10788116,0.012  
10,144.314,rs9421389,0.005  
10,144.371,rs6585662,0.002  
10,144.382,rs2997288,0.002



10,144.400,rs10886772,0.002  
10,144.591,rs11199681,0.004  
10,144.637,rs10886827,0.004  
10,144.651,rs6585682,0.004  
10,144.658,rs4752493,0.005  
10,144.661,rs2260801,0.005  
10,144.730,rs11199725,0.006  
10,144.740,rs2420903,0.007  
10,144.775,rs4752496,0.002  
10,144.870,rs11199775,0.000  
10,144.872,rs7072244,0.000  
10,144.908,rs12259125,0.000  
10,144.996,rs7085142,0.002  
10,145.103,rs11599530,0.001  
10,145.135,rs7905858,0.001  
10,145.146,rs11199859,0.001  
10,145.153,rs4752526,0.002  
10,145.192,rs9630106,0.011  
10,145.293,rs7895870,0.019  
10,145.329,rs10886918,0.020  
10,145.420,rs10788173,0.025  
10,145.425,rs12570261,0.025  
10,145.441,rs4752541,0.016  
10,145.630,rs755698,0.010  
10,145.784,rs11199957,0.006  
10,145.797,rs17101979,0.006  
10,145.986,rs4644589,0.008  
10,146.133,rs1047057,0.005  
10,146.173,rs1613776,0.004  
10,146.438,rs2912787,0.000  
10,146.443,rs2981428,0.000  
10,146.504,rs1649181,-0.004  
10,146.526,rs7896565,-0.005  
10,146.559,rs10788196,-0.002  
10,146.647,rs2936862,0.000  
10,146.649,rs2936863,0.000  
10,146.656,rs2936875,0.000  
10,146.758,rs9651480,0.000  
10,146.910,rs7914615,0.006  
10,147.022,rs6585776,0.010  
10,147.086,rs2459093,0.006  
10,147.113,rs2461224,0.004  
10,147.126,rs12242677,0.004  
10,147.134,rs11200397,0.004  
10,147.136,rs2420993,0.004  
10,147.170,rs10887082,0.004  
10,147.191,rs4752656,0.013  
10,147.194,rs10788250,0.009  
10,147.195,rs10788251,0.009  
10,147.203,rs7097751,0.019  
10,147.208,rs4752659,0.019  
10,147.237,rs10788257,0.031  
10,147.258,rs4751878,0.038  
10,147.285,rs2295873,0.059  
10,147.343,rs12262185,0.093  
10,147.411,rs7082865,0.136  
10,147.466,rs6585819,0.146  
10,147.617,rs2248799,0.168  
10,147.626,rs12571363,0.169  
10,147.631,rs4752699,0.169  
10,147.635,rs4752700,0.169

10,147.668,rs763720,0.158  
10,147.930,rs12266077,0.058  
10,147.940,rs1917847,0.057  
10,147.995,rs11248487,0.052  
10,148.036,rs7096042,0.049  
10,148.038,rs10902963,0.049  
10,148.119,rs18911111,0.047  
10,148.359,rs7070793,0.062  
10,148.409,rs4980248,0.066  
10,148.432,rs7094941,0.061  
10,148.480,rs10794595,0.039  
10,148.490,rs17104688,0.035  
10,148.493,rs17104692,0.034  
10,148.511,rs10902882,0.036  
10,148.547,rs2495774,0.023  
10,148.581,rs2495769,0.022  
10,148.612,rs6599666,0.029  
10,148.625,rs4131048,0.023  
10,148.857,rs6599695,0.030  
10,148.923,rs7916709,0.032  
10,148.977,rs11248533,0.032  
10,149.067,rs705150,0.032  
10,149.133,rs1557614,0.030  
10,149.184,rs7897598,0.029  
10,149.239,rs11248566,0.030  
10,149.241,rs10732908,0.030  
10,149.252,rs1474016,0.030  
10,149.277,rs705169,0.030  
10,149.290,rs841019,0.031  
10,149.714,rs12762474,0.040  
10,149.798,rs1122370,0.037  
10,149.827,rs12261064,0.033  
10,149.979,rs4980204,0.015  
10,150.004,rs10902797,0.014  
10,150.180,rs7909042,0.006  
10,150.192,rs12266074,0.005  
10,150.212,rs727416,0.005  
10,150.292,rs2162536,0.005  
10,150.368,rs7909601,0.004  
10,150.433,rs7924189,0.002  
10,150.531,rs1914543,0.001  
10,150.612,rs7071108,0.005  
10,150.624,rs7096722,0.006  
10,150.656,rs4460752,0.009  
10,150.726,rs4590807,0.012  
10,150.778,rs4472872,0.011  
10,150.857,rs4929820,0.010  
10,151.042,rs11593516,0.011  
10,151.044,rs7905355,0.006  
10,151.083,rs6597799,0.011  
10,151.215,rs7917787,0.011  
10,151.264,rs885042,0.010  
10,151.282,rs10794004,0.010  
10,151.304,rs2459219,0.008  
10,151.357,rs10430741,0.008  
10,151.367,rs17619406,0.008  
10,151.473,rs1710563,0.008  
10,151.569,rs11245086,0.008  
10,151.598,rs12785110,0.009  
10,151.619,rs4962632,0.009  
10,151.630,rs12569498,0.008

10,151.692,rs10901745,0.008  
10,151.811,rs7918137,0.006  
10,151.840,rs12269470,0.005  
10,151.861,rs17152064,0.006  
10,151.891,rs11595762,0.007  
10,152.184,rs4450131,0.018  
10,152.264,rs10794178,0.016  
10,152.703,rs11595972,0.009  
10,152.721,rs11245408,0.009  
10,153.017,rs7097802,0.016  
10,153.057,rs3781433,0.017  
10,153.112,rs3781408,0.025  
10,153.178,rs718947,0.035  
10,153.201,rs2936540,0.037  
10,153.223,rs2936542,0.050  
10,153.224,rs2935652,0.050  
10,153.248,rs3012070,0.057  
10,153.283,rs1152661,0.074  
10,153.476,rs1915146,0.125  
10,153.558,rs1693663,0.132  
10,153.560,rs1715869,0.132  
10,153.587,rs11245535,0.136  
10,153.601,rs4393270,0.137  
10,153.631,rs10901876,0.138  
10,153.667,rs9285980,0.131  
10,153.853,rs3851566,0.094  
10,154.287,rs3886847,0.103  
10,154.333,rs2886405,0.102  
10,154.575,rs4962471,0.075  
10,154.589,rs4962311,0.075  
10,154.644,rs7083854,0.074  
10,154.741,rs297226,0.075  
10,154.992,rs1872006,0.080  
10,155.290,rs10510149,0.094  
10,156.090,rs1871054,0.072  
10,156.180,rs1278313,0.070  
10,156.217,rs7896870,0.067  
10,156.277,rs2169076,0.050  
10,156.284,rs1676741,0.050  
10,156.334,rs1278377,0.048  
10,156.451,rs7097356,0.057  
10,156.574,rs11244923,0.065  
10,156.601,rs10901580,0.070  
10,156.608,rs17154643,0.071  
10,156.710,rs11244948,0.086  
10,156.719,rs10901587,0.088  
10,156.778,rs10901596,0.077  
10,156.936,rs7081193,0.096  
10,156.996,rs7919486,0.089  
10,157.037,rs4077952,0.095  
10,157.081,rs7900906,0.111  
10,157.138,rs4962558,0.100  
10,157.145,rs7091466,0.112  
10,157.148,rs10901612,0.124  
10,157.173,rs7079392,0.115  
10,157.193,rs17154831,0.104  
10,157.286,rs10510159,0.145  
10,157.288,rs4246194,0.146  
10,157.291,rs11245007,0.147  
10,157.393,rs7916680,0.150  
10,157.409,rs7904837,0.160

10,157.432,rs7916733,0.146  
10,157.526,rs10736874,0.124  
10,157.561,rs2576027,0.122  
10,157.703,rs2842169,0.114  
10,157.710,rs1436789,0.113  
10,157.773,rs10736875,0.112  
10,157.846,rs2366870,0.119  
10,157.911,rs10901666,0.106  
10,157.925,rs7905277,0.097  
10,157.928,rs2366878,0.095  
10,157.936,rs17155177,0.097  
10,157.950,rs12771596,0.105  
10,158.046,rs2005556,0.129  
10,158.057,rs6597797,0.130  
10,158.279,rs7074496,0.138  
10,158.281,rs4962373,0.136  
10,158.294,rs11245203,0.124  
10,158.296,rs12246650,0.120  
10,158.298,rs11245204,0.138  
10,158.324,rs11245214,0.124  
10,158.352,rs7474861,0.100  
10,158.377,rs7915184,0.099  
10,158.649,rs10741150,0.048  
10,158.668,rs4750951,0.032  
10,158.690,rs9418677,0.056  
10,158.723,rs7092134,0.057  
10,158.742,rs4750895,0.046  
10,158.822,rs7895398,0.055  
10,159.008,rs2489379,0.075  
10,159.025,rs2483865,0.076  
10,159.186,rs2766070,0.058  
10,159.247,rs12146386,0.096  
10,159.311,rs10764990,0.140  
10,159.335,rs4751282,0.163  
10,159.388,rs4751323,0.168  
10,159.402,rs12412384,0.159  
10,159.404,rs10829972,0.158  
10,159.417,rs3740547,0.147  
10,159.491,rs1931702,0.164  
10,159.495,rs10830067,0.164  
10,159.497,rs7904011,0.165  
10,159.500,rs3740543,0.188  
10,159.574,rs4751427,0.193  
10,159.623,rs999069,0.190  
10,159.628,rs10830112,0.187  
10,159.640,rs4751436,0.183  
10,159.664,rs4751439,0.173  
10,159.726,rs1547321,0.160  
10,159.741,rs971175,0.158  
10,159.793,rs7082785,0.157  
10,159.803,rs1113103,0.134  
10,159.852,rs7079420,0.145  
10,159.902,rs12245508,0.134  
10,159.907,rs1316459,0.115  
10,159.916,rs12248827,0.133  
10,159.968,rs10830159,0.112  
10,160.053,rs1926161,0.098  
10,160.262,rs649611,0.066  
10,160.280,rs11816315,0.059  
10,160.294,rs11018336,0.052  
10,160.314,rs582667,0.035

10,160.333,rs4590782,0.021  
10,160.371,rs11018383,0.009  
10,160.401,rs2148895,0.003  
10,160.408,rs4751548,0.002  
10,160.530,rs7922467,0.006  
10,160.559,rs12266909,0.005  
10,160.583,rs7894368,0.007  
10,160.606,rs4531377,0.008  
10,160.634,rs7085243,0.009  
10,160.662,rs7089539,0.004  
10,160.693,rs4547012,0.001  
10,160.736,rs10829321,-0.001  
10,160.763,rs10764743,-0.001  
10,160.793,rs7911438,-0.001  
10,160.865,rs1063535,-0.001  
10,160.894,rs2853344,-0.001  
10,161.162,rs7912288,-0.002  
10,161.163,rs12572759,-0.002  
10,161.610,rs7086416,-0.000  
10,161.979,rs2244545,0.000  
10,162.342,rs10829388,0.001  
10,162.381,rs2154081,0.002  
10,162.696,rs1541178,0.007  
10,162.843,rs7475176,0.008  
10,162.958,rs1572760,0.005  
10,162.994,rs951827,0.004  
10,163.089,rs1541175,0.003  
10,163.119,rs11016282,0.003  
10,163.367,rs7913051,-0.000  
10,163.388,rs4750710,0.000  
10,163.389,rs7086546,0.000  
10,163.652,rs1359974,-0.000  
10,163.788,rs6482693,0.000  
10,163.820,rs2182965,0.000  
10,163.908,rs7098205,-0.000  
10,164.008,rs748307,-0.004  
10,164.062,rs782388,-0.008  
10,164.130,rs11594084,-0.019  
10,164.135,rs11016427,-0.021  
10,164.155,rs12412378,-0.029  
10,164.184,rs2038967,-0.012  
10,164.278,rs1887244,-0.014  
10,164.423,rs4750717,-0.015  
10,164.488,rs10764807,-0.013  
10,164.547,rs1536452,-0.011  
10,164.707,rs646066,-0.010  
10,165.004,rs7091108,-0.013  
10,165.040,rs4751013,-0.021  
10,165.264,rs10829512,-0.011  
10,165.307,rs10764826,-0.014  
10,165.453,rs3824759,-0.003  
10,165.471,rs10829518,-0.003  
10,165.601,rs7092525,-0.004  
10,165.711,rs2060894,-0.007  
10,165.747,rs4750724,-0.003  
10,165.775,rs7919827,-0.004  
10,166.052,rs914573,-0.005  
10,166.103,rs7099795,-0.005  
10,166.171,rs10829553,-0.006  
10,166.204,rs7101205,-0.003  
10,166.230,rs10829558,-0.001

10,166.447,rs11016684,-0.001  
10,166.496,rs1998824,-0.000  
10,166.537,rs10128422,-0.000  
10,166.735,rs4751072,-0.003  
10,166.798,rs1990783,-0.002  
10,166.839,rs476628,-0.002  
10,166.887,rs11016723,-0.000  
10,166.901,rs2803458,-0.000  
10,167.168,rs11598707,-0.000  
10,167.222,rs2111627,-0.000  
10,167.430,rs6482736,-0.000  
10,167.983,rs551491,0.000  
10,168.319,rs1978759,0.002  
10,168.333,rs2282163,0.002  
10,168.345,rs4751115,0.002  
10,168.467,rs11511217,-0.000  
10,168.537,rs10764906,-0.000  
10,168.552,rs1547177,-0.000  
10,168.591,rs3750832,-0.000  
10,168.637,rs11016948,-0.000  
10,168.719,rs7911165,-0.002  
10,168.740,rs3763758,-0.003  
10,168.789,rs7100028,-0.008  
10,168.790,rs12783441,-0.008  
10,168.827,rs10734091,-0.008  
10,168.839,rs4751140,-0.017  
10,168.862,rs7895769,-0.018  
10,168.875,rs7076708,-0.016  
10,168.916,rs944963,-0.010  
10,168.960,rs4751143,-0.012  
10,169.040,rs6482766,-0.003  
10,169.088,rs4751153,-0.003  
10,169.204,rs670243,-0.000  
10,169.325,rs7069452,0.002  
10,169.375,rs2477970,0.002  
10,169.459,rs671799,0.005  
10,169.474,rs3824760,0.005  
10,169.506,rs662041,0.006  
10,169.559,rs11017074,0.008  
10,169.842,rs16910182,0.025  
10,169.853,rs2281842,0.026  
10,169.885,rs10764938,0.026  
10,169.893,rs4751178,0.026  
10,170.068,rs4750795,0.022  
10,170.227,rs11017185,0.022  
10,170.350,rs7899854,0.022  
10,170.366,rs447363,0.022  
10,170.372,rs7903921,0.022  
10,170.407,rs12569655,0.022  
10,170.459,rs359114,0.022  
10,170.529,rs440075,0.021  
10,170.577,rs10829742,0.006  
10,170.974,rs11017313,0.001  
10,171.096,rs4751239,0.002  
10,171.229,rs12251302,0.003  
10,171.309,rs1176471,0.001  
10,171.576,rs7089879,0.001  
10,171.618,rs7088736,0.001  
10,171.710,rs10741226,0.001  
10,171.827,rs2663014,0.001  
10,171.997,rs7907842,0.000

10,172.020,rs11813883,0.001  
10,172.088,rs12242470,0.000  
10,172.263,rs4751287,-0.000  
10,172.308,rs12769679,-0.001  
10,172.339,rs1036270,-0.004  
10,172.402,rs7072329,-0.006  
10,172.563,rs3125602,-0.006  
10,172.785,rs7924276,-0.001  
10,172.904,rs12764951,-0.000  
10,173.028,rs1891792,0.001  
10,173.073,rs7073264,0.001  
10,173.121,rs4418720,0.002  
10,173.146,rs2298193,0.006  
10,173.206,rs6482862,0.006  
10,173.243,rs11017747,0.006  
10,173.282,rs2918145,0.006  
10,173.303,rs2944529,0.006  
10,173.317,rs12570210,0.007  
10,173.367,rs11017797,0.013  
10,173.382,rs999191,0.013  
10,173.397,rs2944462,0.013  
10,173.433,rs11597694,0.018  
10,173.449,rs4751345,0.022  
10,173.467,rs2918125,0.016  
10,173.484,rs10741246,0.011  
10,173.486,rs2918123,0.011  
10,173.596,rs1020105,0.008  
10,173.670,rs12573222,0.008  
10,173.763,rs2918118,0.008  
10,173.839,rs10829970,0.007  
10,173.872,rs11017878,0.007  
10,173.885,rs2397769,0.006  
10,173.904,rs7078641,0.006  
10,173.979,rs7898539,0.004  
10,174.093,rs3123221,0.004  
10,174.150,rs7893895,0.006  
10,174.171,rs4076152,0.006  
10,174.214,rs10830004,0.007  
10,174.298,rs3125535,0.009  
10,174.530,rs10830019,0.015  
10,174.611,rs12164734,0.011  
10,174.639,rs7895295,0.010  
10,174.715,rs12779178,0.019  
10,174.737,rs10830037,0.022  
10,174.738,rs4486534,0.022  
10,175.046,rs10872807,0.029  
10,175.148,rs3924169,0.032  
10,175.224,rs4545466,0.035  
10,175.282,rs10872825,0.030  
10,175.290,rs9419698,0.031  
10,175.322,rs9419702,0.035  
10,175.336,rs7906770,0.033  
10,175.415,rs4307646,0.029  
10,175.580,rs7893330,0.034  
10,175.605,rs11156481,0.034  
10,175.874,rs9419387,0.056  
10,176.019,rs11596895,0.075  
10,176.053,rs9419257,0.077  
10,176.059,rs9419138,0.078  
10,176.126,rs9419167,0.077  
10,176.148,rs9419332,0.074

10,176.312,rs7083603,0.082  
10,176.323,rs1491192,0.086  
10,176.469,rs2101613,0.123  
10,176.559,rs870427,0.152  
10,176.654,rs10781565,0.191  
10,176.826,rs4554798,0.171  
10,176.928,rs10870303,0.149  
10,176.989,rs4880251,0.148  
10,177.026,rs10870304,0.149  
10,177.192,rs4492738,0.155  
10,177.447,rs7907513,0.178  
10,177.571,rs4880419,0.190  
10,177.595,rs10781583,0.189  
10,177.751,rs3793669,0.188  
10,177.940,rs7096226,0.186  
10,178.090,rs9419242,0.166  
10,178.120,rs10870347,0.164  
10,178.264,rs12242379,0.163  
10,178.366,rs10870214,0.161  
10,178.583,rs11591580,0.149  
10,178.692,rs736017,0.140  
10,178.727,rs9419011,0.136  
10,178.902,rs11101622,0.098  
10,178.996,rs12415590,0.085  
10,179.041,rs2185743,0.080  
10,179.117,rs1573041,0.075  
10,179.238,rs2298122,0.098  
10,179.317,rs11819066,0.120  
10,179.391,rs6537600,0.140  
10,179.566,rs2255518,0.169  
10,179.939,rs4628635,0.086  
11,0.041,rs6421966,-0.301  
11,0.322,rs1541314,-0.310  
11,0.398,rs3829223,-0.312  
11,0.445,rs5743899,-0.312  
11,0.620,rs4881729,-0.314  
11,0.689,rs10833703,-0.319  
11,1.080,rs7947734,-0.276  
11,1.172,rs16927458,-0.282  
11,1.202,rs1489945,-0.285  
11,1.250,rs11607954,-0.265  
11,1.257,rs4752744,-0.275  
11,1.302,rs4752733,-0.297  
11,1.527,rs907604,-0.366  
11,1.543,rs907609,-0.373  
11,1.578,rs2089910,-0.329  
11,1.658,rs548195,-0.338  
11,1.717,rs909116,-0.344  
11,1.887,rs4930103,-0.340  
11,1.927,rs4930001,-0.322  
11,1.993,rs11825579,-0.302  
11,2.016,rs4930030,-0.294  
11,2.158,rs734351,-0.245  
11,2.186,rs1004446,-0.263  
11,2.244,rs11042978,-0.302  
11,2.318,rs11043140,-0.283  
11,2.333,rs11021732,-0.276  
11,2.466,rs10831706,-0.294  
11,2.466,rs2521259,-0.294  
11,2.474,rs1029409,-0.298  
11,2.665,rs2019938,-0.356



11,2.701,rs739673,-0.370  
11,2.736,rs2301698,-0.350  
11,2.809,rs800336,-0.247  
11,2.822,rs11022922,-0.239  
11,2.949,rs11826873,-0.228  
11,2.964,rs2283155,-0.227  
11,2.972,rs179431,-0.238  
11,2.993,rs1997619,-0.292  
11,3.015,rs4539307,-0.355  
11,3.030,rs2283169,-0.366  
11,3.068,rs4930128,-0.392  
11,3.087,rs12808620,-0.407  
11,3.133,rs7104624,-0.424  
11,3.154,rs7929804,-0.438  
11,3.254,rs12418076,-0.443  
11,3.301,rs7939976,-0.444  
11,3.354,rs2283202,-0.467  
11,3.357,rs231888,-0.468  
11,3.384,rs231906,-0.512  
11,3.406,rs7114479,-0.514  
11,3.437,rs11023999,-0.510  
11,3.444,rs179785,-0.505  
11,3.504,rs2237886,-0.494  
11,3.522,rs151316,-0.488  
11,3.579,rs163184,-0.425  
11,3.688,rs4930026,-0.418  
11,3.713,rs384037,-0.398  
11,3.736,rs367035,-0.387  
11,3.763,rs16928809,-0.398  
11,3.768,rs427398,-0.400  
11,4.018,rs451041,-0.445  
11,4.163,rs7925089,-0.360  
11,4.164,rs4237782,-0.358  
11,4.183,rs4758529,-0.281  
11,4.230,rs1562353,-0.215  
11,4.260,rs4261264,-0.180  
11,4.265,rs4758544,-0.175  
11,4.304,rs2412143,-0.147  
11,4.310,rs16929180,-0.146  
11,4.343,rs4758480,-0.145  
11,4.346,rs7106188,-0.145  
11,4.402,rs4556520,-0.135  
11,4.427,rs11026091,-0.141  
11,4.636,rs2073805,-0.195  
11,4.658,rs17761375,-0.198  
11,4.710,rs7103207,-0.204  
11,5.094,rs7127562,-0.156  
11,5.206,rs6578399,-0.154  
11,5.220,rs10834648,-0.172  
11,5.260,rs6578410,-0.170  
11,5.357,rs10834863,-0.202  
11,5.493,rs7931756,-0.229  
11,5.499,rs276885,-0.231  
11,5.577,rs7120836,-0.273  
11,5.603,rs1451724,-0.283  
11,5.616,rs7934650,-0.284  
11,5.661,rs7126870,-0.256  
11,5.728,rs10742189,-0.234  
11,5.733,rs4365044,-0.232  
11,6.070,rs2268166,-0.258  
11,6.141,rs10835678,-0.263

11,6.173,rs979942,-0.261  
11,6.523,rs12293167,-0.173  
11,6.560,rs2554933,-0.195  
11,6.597,rs1376679,-0.196  
11,6.607,rs1549489,-0.189  
11,6.628,rs10836054,-0.184  
11,6.638,rs4910980,-0.195  
11,6.646,rs4910981,-0.178  
11,6.671,rs167948,-0.204  
11,6.720,rs11032431,-0.185  
11,6.844,rs2657147,-0.139  
11,6.869,rs7129059,-0.153  
11,6.884,rs4573672,-0.149  
11,6.992,rs16923484,-0.136  
11,7.004,rs10768149,-0.135  
11,7.007,rs7937180,-0.135  
11,7.019,rs3817098,-0.134  
11,7.154,rs10836470,-0.114  
11,7.155,rs10742359,-0.114  
11,7.213,rs7108524,-0.105  
11,7.270,rs7478759,-0.094  
11,7.346,rs1865286,-0.081  
11,7.455,rs7112101,-0.055  
11,7.488,rs1469750,-0.048  
11,7.505,rs840716,-0.052  
11,7.536,rs2595993,-0.058  
11,7.670,rs2499958,-0.048  
11,7.818,rs1378736,-0.029  
11,7.862,rs7116353,-0.027  
11,7.880,rs6578548,-0.028  
11,8.025,rs4512811,-0.025  
11,8.078,rs2472528,-0.028  
11,8.216,rs11602279,-0.028  
11,8.250,rs11036212,-0.032  
11,8.325,rs11036364,-0.035  
11,8.359,rs10488678,-0.035  
11,8.501,rs4601817,-0.034  
11,8.545,rs3898917,-0.027  
11,8.566,rs11036766,-0.027  
11,8.573,rs7118086,-0.028  
11,8.586,rs366533,-0.041  
11,8.634,rs4910812,-0.020  
11,8.720,rs7934354,-0.018  
11,8.722,rs10769054,-0.018  
11,8.822,rs2341434,-0.012  
11,8.854,rs7117257,-0.009  
11,8.876,rs6578665,-0.011  
11,8.885,rs7108470,-0.012  
11,9.046,rs7122620,-0.010  
11,9.064,rs12808061,-0.010  
11,9.109,rs3802980,-0.012  
11,9.205,rs12285602,-0.014  
11,9.223,rs11604371,-0.014  
11,9.487,rs8181512,-0.025  
11,9.510,rs4910851,-0.026  
11,9.738,rs1453428,-0.021  
11,9.774,rs11040807,-0.010  
11,9.784,rs3750944,-0.008  
11,9.905,rs1042048,-0.006  
11,9.920,rs10769677,-0.007  
11,9.946,rs6578752,-0.009

11,9.963,rs11040851,-0.007  
11,9.970,rs10839548,-0.010  
11,9.975,rs2344350,-0.006  
11,9.982,rs4758407,-0.006  
11,10.000,rs2634184,-0.003  
11,10.044,rs2171605,-0.001  
11,10.168,rs1542705,-0.000  
11,10.222,rs10839563,-0.000  
11,10.226,rs1552513,-0.000  
11,10.237,rs2723664,-0.000  
11,10.279,rs4758417,-0.000  
11,10.298,rs1906656,-0.000  
11,10.485,rs10839574,0.000  
11,10.495,rs10734609,0.000  
11,10.512,rs11604481,0.000  
11,10.560,rs11040923,-0.000  
11,10.742,rs7111291,-0.007  
11,10.771,rs12294943,-0.010  
11,10.827,rs1567135,-0.013  
11,10.827,rs16917042,-0.013  
11,11.023,rs670151,-0.016  
11,11.264,rs7938371,-0.012  
11,11.292,rs2741829,-0.012  
11,11.361,rs12288515,-0.018  
11,11.363,rs10839658,-0.018  
11,11.411,rs11824633,-0.009  
11,11.461,rs71117376,-0.004  
11,11.496,rs2857917,-0.002  
11,11.520,rs2515949,-0.002  
11,11.669,rs10839708,-0.001  
11,11.916,rs10500683,-0.001  
11,12.014,rs7106726,-0.000  
11,12.041,rs1487841,-0.000  
11,12.073,rs11041273,-0.000  
11,12.075,rs1552463,-0.000  
11,12.172,rs1319309,0.000  
11,12.181,rs7948390,0.000  
11,12.188,rs2200651,0.000  
11,12.230,rs973108,0.000  
11,12.255,rs6578849,0.000  
11,12.335,rs2346828,0.000  
11,12.368,rs7938208,-0.000  
11,12.372,rs7946655,-0.001  
11,12.375,rs4757993,-0.001  
11,12.412,rs4072103,-0.000  
11,12.437,rs4758185,-0.000  
11,12.455,rs11041401,-0.001  
11,12.461,rs4351800,-0.001  
11,12.478,rs4338502,-0.002  
11,12.575,rs12791447,-0.016  
11,12.593,rs4076808,-0.019  
11,12.601,rs11041441,-0.019  
11,12.656,rs6578885,-0.021  
11,12.662,rs7933428,-0.031  
11,12.677,rs9787734,-0.024  
11,12.682,rs4758205,-0.020  
11,12.697,rs3892335,-0.016  
11,12.721,rs10769813,-0.018  
11,12.857,rs10839843,-0.024  
11,12.864,rs11041537,-0.033  
11,13.236,rs10500702,-0.049

11,13.254,rs7928132,-0.050  
11,13.267,rs11041644,-0.045  
11,13.282,rs16933545,-0.053  
11,13.386,rs907203,-0.060  
11,13.398,rs11041688,-0.060  
11,13.414,rs12363522,-0.062  
11,13.496,rs4758038,-0.070  
11,13.499,rs12786251,-0.070  
11,13.634,rs7932687,-0.066  
11,13.659,rs4758040,-0.071  
11,13.680,rs1317500,-0.072  
11,13.764,rs4758295,-0.066  
11,13.936,rs7927509,-0.066  
11,13.943,rs4758051,-0.066  
11,14.011,rs2311011,-0.043  
11,14.030,rs204937,-0.041  
11,14.072,rs7104520,-0.039  
11,14.132,rs10840016,-0.050  
11,14.134,rs897102,-0.063  
11,14.141,rs7102266,-0.070  
11,14.152,rs10840020,-0.059  
11,14.231,rs4758350,-0.072  
11,14.236,rs4237772,-0.072  
11,14.428,rs12282398,-0.094  
11,14.589,rs7105027,-0.103  
11,14.622,rs10840070,-0.104  
11,14.798,rs9633894,-0.105  
11,15.465,rs2116513,-0.080  
11,15.926,rs10840166,-0.062  
11,15.984,rs2647528,-0.068  
11,15.987,rs4910440,-0.068  
11,16.006,rs10769990,-0.070  
11,16.084,rs7116459,-0.085  
11,16.143,rs7950276,-0.098  
11,16.153,rs4910048,-0.100  
11,16.186,rs7101776,-0.096  
11,16.297,rs10770043,-0.085  
11,16.371,rs431480,-0.107  
11,16.385,rs1056593,-0.105  
11,16.485,rs7950655,-0.095  
11,16.551,rs17272751,-0.096  
11,16.664,rs12278680,-0.100  
11,16.748,rs1580004,-0.103  
11,16.752,rs2957707,-0.126  
11,16.766,rs2923088,-0.189  
11,16.779,rs4909926,-0.228  
11,16.783,rs10743138,-0.238  
11,16.790,rs10840408,-0.255  
11,16.806,rs1450270,-0.284  
11,16.841,rs7125888,-0.274  
11,16.847,rs10840427,-0.262  
11,16.847,rs11042854,-0.262  
11,16.849,rs4910146,-0.263  
11,16.850,rs7932321,-0.263  
11,16.873,rs7938782,-0.271  
11,16.891,rs17403942,-0.286  
11,16.915,rs16927077,-0.306  
11,16.919,rs1017275,-0.310  
11,16.942,rs7944136,-0.327  
11,16.945,rs2033049,-0.327  
11,17.202,rs11042939,-0.385

11,17.209,rs4910184,-0.384  
11,17.239,rs2279696,-0.372  
11,17.256,rs12418180,-0.367  
11,17.277,rs10500731,-0.366  
11,17.422,rs771374,-0.356  
11,17.520,rs2896567,-0.364  
11,17.541,rs7947494,-0.378  
11,17.730,rs1386158,-0.340  
11,17.825,rs7938527,-0.348  
11,17.855,rs274503,-0.372  
11,17.881,rs924796,-0.391  
11,17.905,rs4909963,-0.385  
11,18.141,rs2655103,-0.357  
11,18.234,rs11043167,-0.350  
11,18.300,rs4408307,-0.386  
11,18.312,rs4576814,-0.393  
11,18.351,rs7935881,-0.415  
11,18.404,rs4910293,-0.446  
11,18.450,rs4910294,-0.419  
11,18.467,rs4559684,-0.408  
11,18.490,rs4910306,-0.403  
11,18.544,rs4909987,-0.357  
11,18.555,rs4910320,-0.346  
11,18.571,rs901555,-0.334  
11,18.586,rs11021810,-0.329  
11,18.593,rs9888138,-0.360  
11,18.599,rs1352239,-0.365  
11,18.667,rs3993153,-0.298  
11,18.680,rs10047474,-0.292  
11,18.703,rs10765844,-0.278  
11,18.766,rs7101677,-0.237  
11,18.817,rs901545,-0.210  
11,18.835,rs1023982,-0.200  
11,18.845,rs12363821,-0.199  
11,18.874,rs12278731,-0.194  
11,18.896,rs10831616,-0.196  
11,18.905,rs4910006,-0.214  
11,18.910,rs4910008,-0.244  
11,18.985,rs4910362,-0.262  
11,19.063,rs4550214,-0.245  
11,19.179,rs7126296,-0.197  
11,19.215,rs4910386,-0.187  
11,19.222,rs7118819,-0.185  
11,19.281,rs10765871,-0.180  
11,19.312,rs10765873,-0.180  
11,19.347,rs12283371,-0.187  
11,19.379,rs10765880,-0.196  
11,19.425,rs12803005,-0.212  
11,19.494,rs7480726,-0.235  
11,19.758,rs4910407,-0.256  
11,19.889,rs4910411,-0.240  
11,20.028,rs2054117,-0.220  
11,20.219,rs7108356,-0.187  
11,20.254,rs4910031,-0.181  
11,20.404,rs4757595,-0.155  
11,20.413,rs1038909,-0.117  
11,20.419,rs6485350,-0.114  
11,20.469,rs4500466,-0.144  
11,20.527,rs6485416,-0.159  
11,20.531,rs7928952,-0.166  
11,20.565,rs10831716,-0.213

11,20.578,rs17383023,-0.220  
11,20.627,rs3763820,-0.167  
11,20.643,rs4756772,-0.161  
11,20.660,rs10741566,-0.149  
11,20.660,rs4237703,-0.149  
11,20.674,rs977244,-0.135  
11,20.699,rs4644628,-0.133  
11,20.701,rs10831742,-0.114  
11,20.702,rs7102041,-0.108  
11,20.735,rs10741568,-0.104  
11,20.822,rs2012580,-0.093  
11,20.848,rs2706645,-0.099  
11,20.889,rs2706660,-0.112  
11,20.895,rs11022264,-0.125  
11,20.899,rs2270513,-0.132  
11,20.908,rs8808,-0.126  
11,20.910,rs903208,-0.125  
11,20.925,rs16910954,-0.111  
11,21.058,rs16911142,-0.073  
11,21.058,rs4757381,-0.073  
11,21.071,rs11022320,-0.071  
11,21.104,rs12365064,-0.065  
11,21.200,rs10831815,-0.047  
11,21.242,rs11022358,-0.048  
11,21.252,rs1365403,-0.052  
11,21.278,rs1991320,-0.062  
11,21.351,rs11022378,-0.085  
11,21.372,rs933930,-0.131  
11,21.389,rs7644,-0.142  
11,21.407,rs12421465,-0.153  
11,21.430,rs1863584,-0.196  
11,21.523,rs7121444,-0.238  
11,21.544,rs4237723,-0.249  
11,21.647,rs6485989,-0.252  
11,22.023,rs7115063,-0.289  
11,22.058,rs12364619,-0.286  
11,22.064,rs1440278,-0.273  
11,22.070,rs747113,-0.256  
11,22.073,rs745361,-0.252  
11,22.079,rs17503615,-0.254  
11,22.107,rs7929650,-0.261  
11,22.109,rs10831931,-0.259  
11,22.115,rs4485088,-0.243  
11,22.158,rs16911996,-0.267  
11,22.169,rs977169,-0.274  
11,22.194,rs7117526,-0.308  
11,22.203,rs10766048,-0.322  
11,22.220,rs1481871,-0.295  
11,22.229,rs748923,-0.293  
11,22.232,rs16912392,-0.292  
11,22.256,rs12795870,-0.282  
11,22.262,rs11607529,-0.280  
11,22.344,rs7950226,-0.277  
11,22.438,rs6486121,-0.279  
11,22.511,rs3789327,-0.307  
11,22.575,rs11022817,-0.317  
11,22.612,rs7129719,-0.299  
11,22.657,rs1507533,-0.286  
11,22.666,rs4756771,-0.284  
11,22.716,rs1027837,-0.274  
11,22.729,rs1919299,-0.270

11,22.788,rs10832164,-0.297  
11,22.810,rs7104613,-0.295  
11,22.900,rs4756776,-0.333  
11,23.076,rs7935792,-0.356  
11,23.090,rs1562902,-0.358  
11,23.118,rs12416759,-0.350  
11,23.399,rs756152,-0.269  
11,23.443,rs4492803,-0.311  
11,23.472,rs1792537,-0.296  
11,23.498,rs1612783,-0.291  
11,23.562,rs4343008,-0.280  
11,23.586,rs16931247,-0.291  
11,23.610,rs2156827,-0.302  
11,23.615,rs10832444,-0.322  
11,24.006,rs12365254,-0.356  
11,24.055,rs1484444,-0.384  
11,24.172,rs923031,-0.363  
11,24.236,rs7112764,-0.348  
11,24.270,rs12576777,-0.358  
11,24.332,rs1440703,-0.375  
11,24.353,rs2615040,-0.373  
11,24.434,rs4237711,-0.367  
11,24.462,rs7942880,-0.367  
11,24.478,rs11023830,-0.367  
11,24.643,rs1840422,-0.374  
11,24.650,rs12360975,-0.374  
11,24.731,rs1949481,-0.372  
11,24.875,rs1866109,-0.368  
11,25.009,rs7937011,-0.366  
11,25.355,rs217765,-0.312  
11,25.363,rs12577561,-0.311  
11,25.398,rs216496,-0.305  
11,25.406,rs1027617,-0.304  
11,25.408,rs4756865,-0.314  
11,25.576,rs6486330,-0.397  
11,25.579,rs1544506,-0.469  
11,25.629,rs10741725,-0.401  
11,25.672,rs2285676,-0.348  
11,25.675,rs8192690,-0.347  
11,25.685,rs2074309,-0.314  
11,25.690,rs2237988,-0.314  
11,25.727,rs2074308,-0.317  
11,25.803,rs7950189,-0.320  
11,25.954,rs3758953,-0.333  
11,26.011,rs7129639,-0.299  
11,26.150,rs11603262,-0.282  
11,26.330,rs4757544,-0.295  
11,26.410,rs7106548,-0.333  
11,26.448,rs7107242,-0.330  
11,26.965,rs10766419,-0.286  
11,27.242,rs2299636,-0.319  
11,27.288,rs2283250,-0.292  
11,27.367,rs2237929,-0.287  
11,27.381,rs7119188,-0.287  
11,27.401,rs529191,-0.287  
11,27.546,rs1079785,-0.288  
11,27.614,rs2468849,-0.294  
11,27.647,rs2468826,-0.274  
11,27.654,rs2468821,-0.268  
11,27.696,rs16935005,-0.229  
11,27.698,rs2468812,-0.229

11,27.743,rs1520887,-0.221  
11,27.744,rs12282742,-0.221  
11,27.757,rs2045272,-0.214  
11,27.799,rs7128017,-0.196  
11,27.864,rs4150667,-0.199  
11,27.883,rs7946331,-0.191  
11,28.002,rs2132302,-0.192  
11,28.049,rs2271079,-0.187  
11,28.179,rs4757695,-0.175  
11,28.204,rs10832971,-0.170  
11,28.229,rs10832973,-0.169  
11,28.233,rs2278734,-0.171  
11,28.248,rs4756961,-0.174  
11,28.262,rs921082,-0.175  
11,28.284,rs4074853,-0.188  
11,28.302,rs12577551,-0.199  
11,28.390,rs2086698,-0.198  
11,28.519,rs2170655,-0.167  
11,28.571,rs7109068,-0.187  
11,28.637,rs11025018,-0.170  
11,28.690,rs10833066,-0.159  
11,28.700,rs1503501,-0.157  
11,28.704,rs4757767,-0.156  
11,28.730,rs10766536,-0.122  
11,28.776,rs2292061,-0.118  
11,28.803,rs12273302,-0.114  
11,28.935,rs4237740,-0.093  
11,29.074,rs1648222,-0.087  
11,29.184,rs10734274,-0.075  
11,29.410,rs2702703,-0.054  
11,29.454,rs4353249,-0.050  
11,29.461,rs2702671,-0.050  
11,29.465,rs2702676,-0.050  
11,29.567,rs4756999,-0.049  
11,29.715,rs1055543,-0.052  
11,29.748,rs2702646,-0.037  
11,29.779,rs10500854,-0.044  
11,29.843,rs1487198,-0.040  
11,29.863,rs1487204,-0.038  
11,29.965,rs1487180,-0.037  
11,30.690,rs2012651,-0.029  
11,30.998,rs2278132,-0.031  
11,31.299,rs10833162,-0.038  
11,31.329,rs11025239,-0.039  
11,31.436,rs11025246,-0.040  
11,31.562,rs2896583,-0.038  
11,31.704,rs918988,-0.041  
11,31.884,rs1425235,-0.041  
11,31.930,rs4757851,-0.038  
11,32.086,rs1443118,-0.031  
11,32.404,rs2218329,-0.030  
11,32.472,rs2028603,-0.030  
11,32.607,rs4757857,-0.046  
11,32.947,rs11025333,-0.053  
11,33.162,rs10766610,-0.041  
11,33.400,rs10500866,-0.019  
11,33.402,rs10833218,-0.017  
11,33.404,rs4757879,-0.010  
11,33.410,rs10741808,-0.018  
11,33.593,rs2584834,-0.020  
11,33.784,rs7125647,-0.024



11,33.883,rs1372796,-0.019  
11,33.943,rs1978947,-0.017  
11,33.947,rs12785600,-0.011  
11,33.979,rs7951443,-0.017  
11,33.985,rs6483640,-0.017  
11,34.151,rs1837971,-0.007  
11,34.181,rs2243437,-0.006  
11,34.233,rs2246192,-0.011  
11,34.239,rs11025397,-0.011  
11,34.285,rs831471,-0.014  
11,34.289,rs12280260,-0.014  
11,34.294,rs1442717,-0.014  
11,34.317,rs831460,-0.015  
11,34.329,rs831464,-0.016  
11,34.372,rs1520910,-0.020  
11,34.418,rs11025430,-0.027  
11,34.470,rs7127406,-0.032  
11,34.530,rs10458884,-0.035  
11,34.553,rs10833272,-0.034  
11,34.600,rs1108001,-0.034  
11,34.672,rs2132964,-0.033  
11,35.029,rs11025608,-0.028  
11,35.120,rs894747,-0.024  
11,35.150,rs7119457,-0.024  
11,35.153,rs10766703,-0.024  
11,35.208,rs7127159,-0.021  
11,35.209,rs10466424,-0.021  
11,35.222,rs1792971,-0.018  
11,35.314,rs10766719,-0.004  
11,35.527,rs16906988,-0.008  
11,35.591,rs12270126,-0.008  
11,35.668,rs2040316,-0.006  
11,35.724,rs11025878,-0.002  
11,35.733,rs1914249,-0.003  
11,35.752,rs7937542,-0.003  
11,35.754,rs11025886,-0.003  
11,35.772,rs16907379,-0.002  
11,35.813,rs1894054,-0.002  
11,35.818,rs7110500,-0.002  
11,35.891,rs10766769,-0.002  
11,35.925,rs11025951,-0.004  
11,35.939,rs7940204,-0.004  
11,35.974,rs1670644,-0.004  
11,36.023,rs1670638,-0.009  
11,36.039,rs11025990,-0.020  
11,36.039,rs12805365,-0.027  
11,36.040,rs1454001,-0.030  
11,36.040,rs10766778,-0.030  
11,36.041,rs1945331,-0.029  
11,36.060,rs10766779,-0.025  
11,36.156,rs4923528,-0.034  
11,36.159,rs4399327,-0.035  
11,36.188,rs1894090,-0.041  
11,36.190,rs11026038,-0.041  
11,36.213,rs7926858,-0.035  
11,36.219,rs4923569,-0.047  
11,36.224,rs7949183,-0.048  
11,36.230,rs16908013,-0.045  
11,36.254,rs10160607,-0.035  
11,36.255,rs7109477,-0.034  
11,36.273,rs10833525,-0.007

11,36.274,rs1981410,-0.006  
11,36.285,rs11026074,-0.003  
11,36.285,rs883128,-0.003  
11,36.292,rs10833529,-0.002  
11,36.336,rs1945410,-0.004  
11,36.432,rs11026122,-0.004  
11,36.496,rs11026133,-0.002  
11,36.530,rs1945569,-0.000  
11,36.535,rs11602745,-0.000  
11,36.560,rs7127820,-0.002  
11,36.599,rs7129113,-0.005  
11,36.606,rs4492823,-0.006  
11,36.744,rs1459873,-0.006  
11,36.957,rs4922945,0.000  
11,37.040,rs1487814,-0.000  
11,37.151,rs324178,0.003  
11,37.216,rs10500921,0.004  
11,37.233,rs16909097,0.005  
11,37.299,rs7358426,0.008  
11,37.635,rs7946568,0.023  
11,37.684,rs11026531,0.025  
11,37.808,rs2665675,0.050  
11,37.858,rs16909564,0.055  
11,37.887,rs925633,0.059  
11,37.903,rs10833766,0.060  
11,37.982,rs16909703,0.082  
11,38.008,rs1355889,0.081  
11,38.122,rs1479896,0.086  
11,38.143,rs91294,0.084  
11,38.257,rs4307722,0.086  
11,38.282,rs2041466,0.086  
11,38.486,rs7113718,0.159  
11,38.569,rs11026887,0.163  
11,38.657,rs2468638,0.167  
11,38.722,rs7119653,0.169  
11,38.761,rs7933654,0.169  
11,38.766,rs4578382,0.170  
11,38.834,rs2449429,0.172  
11,38.897,rs11027083,0.174  
11,38.946,rs10500951,0.162  
11,39.005,rs7931150,0.147  
11,39.198,rs7935052,0.112  
11,39.294,rs16911459,0.113  
11,39.333,rs1519423,0.122  
11,39.395,rs7128154,0.121  
11,39.401,rs11823466,0.119  
11,39.472,rs11027415,0.093  
11,39.474,rs10500966,0.088  
11,39.539,rs12272427,0.086  
11,39.623,rs4317983,0.087  
11,39.631,rs4923127,0.088  
11,39.741,rs11027552,0.092  
11,39.775,rs7123551,0.093  
11,39.837,rs10834232,0.094  
11,39.846,rs7930839,0.093  
11,39.997,rs10500973,0.078  
11,40.065,rs2139518,0.088  
11,40.071,rs10767156,0.080  
11,40.129,rs1915061,0.109  
11,40.168,rs2403896,0.101  
11,40.218,rs4923162,0.087

11,40.461,rs11027822,0.073  
11,40.485,rs10834318,0.070  
11,40.493,rs7928698,0.069  
11,40.764,rs7943454,0.036  
11,40.938,rs1858156,0.017  
11,41.154,rs7395433,0.001  
11,41.163,rs4604884,0.001  
11,41.167,rs12099324,0.001  
11,41.193,rs10834449,0.000  
11,41.213,rs10834460,-0.000  
11,41.215,rs2716461,0.000  
11,41.217,rs10500989,0.000  
11,41.229,rs17235001,0.000  
11,41.230,rs1906099,0.000  
11,41.236,rs1386253,-0.000  
11,41.262,rs2716441,0.000  
11,41.354,rs10834486,0.002  
11,41.387,rs7120732,0.008  
11,41.390,rs1486688,0.009  
11,41.407,rs2631506,0.010  
11,41.433,rs2716509,0.009  
11,41.477,rs1960472,0.008  
11,41.492,rs16913433,0.008  
11,41.626,rs7481112,0.015  
11,41.840,rs1446160,0.028  
11,41.870,rs12805702,0.030  
11,42.011,rs2162164,0.036  
11,42.072,rs2059541,0.025  
11,42.133,rs2404060,0.025  
11,42.399,rs882258,0.025  
11,42.452,rs11028833,0.011  
11,42.455,rs1389412,0.011  
11,42.665,rs1441504,0.020  
11,42.692,rs11603501,0.022  
11,42.781,rs2033976,0.026  
11,42.805,rs1348165,0.027  
11,42.931,rs12363688,0.030  
11,43.020,rs11029147,0.023  
11,43.081,rs3108814,0.018  
11,43.290,rs11029525,0.020  
11,43.312,rs10834970,0.020  
11,43.313,rs10834971,0.020  
11,43.322,rs716701,0.020  
11,43.461,rs1389460,0.018  
11,43.472,rs4274172,0.017  
11,43.509,rs10834998,0.016  
11,43.555,rs12418975,0.014  
11,43.583,rs2131691,0.014  
11,43.640,rs7930308,0.017  
11,43.645,rs10835072,0.017  
11,43.781,rs12279221,0.017  
11,43.824,rs12362707,0.018  
11,43.831,rs16916399,0.018  
11,43.836,rs10835093,0.010  
11,43.850,rs1445325,0.011  
11,44.001,rs12277945,0.016  
11,44.027,rs7939668,0.017  
11,44.040,rs12294703,0.017  
11,44.064,rs10835138,0.016  
11,44.114,rs7479309,0.014  
11,44.248,rs12271278,0.027

11,44.268,rs7945211,0.028  
11,44.504,rs12273363,0.030  
11,44.504,rs908867,0.030  
11,44.519,rs2172229,0.035  
11,44.525,rs10501091,0.036  
11,44.525,rs10501089,0.037  
11,44.539,rs1491864,0.043  
11,44.592,rs4923506,0.061  
11,44.653,rs10458896,0.062  
11,44.659,rs11030196,0.062  
11,44.735,rs17310125,0.063  
11,44.885,rs11030363,0.065  
11,44.934,rs11030393,0.067  
11,44.958,rs2355996,0.076  
11,44.990,rs548797,0.090  
11,45.043,rs2945096,0.091  
11,45.271,rs7114955,0.083  
11,45.447,rs1502447,0.073  
11,45.500,rs4447203,0.076  
11,45.535,rs7481118,0.074  
11,45.635,rs2356579,0.070  
11,45.689,rs541109,0.068  
11,45.744,rs1009070,0.066  
11,45.746,rs1231637,0.066  
11,45.907,rs324299,0.060  
11,46.064,rs9300005,0.062  
11,46.140,rs1764528,0.065  
11,46.422,rs1026477,0.080  
11,46.555,rs811210,0.098  
11,46.594,rs16920925,0.099  
11,46.631,rs533824,0.101  
11,46.696,rs2593549,0.104  
11,46.741,rs16921067,0.084  
11,46.742,rs12295670,0.084  
11,46.744,rs294354,0.085  
11,46.773,rs1447267,0.092  
11,46.796,rs294363,0.097  
11,46.880,rs638196,0.100  
11,47.080,rs459581,0.106  
11,47.193,rs1232186,0.093  
11,47.283,rs662702,0.081  
11,47.337,rs682572,0.081  
11,47.365,rs224597,0.089  
11,47.388,rs224663,0.106  
11,47.394,rs10767910,0.108  
11,47.406,rs224619,0.127  
11,47.409,rs2745882,0.128  
11,47.418,rs881183,0.128  
11,47.440,rs4922579,0.128  
11,47.480,rs989570,0.155  
11,47.492,rs1467459,0.149  
11,47.506,rs12417249,0.164  
11,47.513,rs7481082,0.171  
11,47.538,rs910514,0.188  
11,47.556,rs1884232,0.194  
11,47.590,rs12293750,0.205  
11,47.615,rs2067666,0.212  
11,47.624,rs11031821,0.216  
11,47.639,rs17749506,0.236  
11,47.652,rs1872706,0.253  
11,47.752,rs7107642,0.308

11,47.766,rs198270,0.315  
11,47.796,rs7933966,0.327  
11,47.924,rs1064005,0.367  
11,48.026,rs2474871,0.382  
11,48.189,rs16924091,0.403  
11,48.198,rs4388862,0.404  
11,48.332,rs11032242,0.424  
11,48.377,rs7929907,0.405  
11,48.398,rs2615919,0.386  
11,48.407,rs2615945,0.381  
11,48.767,rs10768011,0.339  
11,48.859,rs12290650,0.316  
11,48.868,rs10742304,0.314  
11,49.062,rs3817442,0.269  
11,49.402,rs2038602,0.321  
11,49.879,rs2273799,0.310  
11,50.198,rs7119405,0.374  
11,50.404,rs2181165,0.419  
11,50.493,rs7119163,0.477  
11,50.501,rs7941690,0.492  
11,50.509,rs7121633,0.509  
11,50.537,rs12419404,0.550  
11,50.549,rs2143868,0.567  
11,50.551,rs9666645,0.562  
11,50.553,rs2957497,0.559  
11,50.557,rs2746628,0.515  
11,50.560,rs1033752,0.517  
11,50.561,rs4756119,0.535  
11,50.568,rs2611145,0.591  
11,50.569,rs2755167,0.590  
11,50.572,rs1967745,0.588  
11,50.576,rs2755147,0.595  
11,50.578,rs2955957,0.582  
11,50.579,rs12289087,0.579  
11,50.580,rs2611140,0.576  
11,50.580,rs1267471,0.535  
11,50.588,rs2078165,0.518  
11,50.597,rs997704,0.556  
11,50.621,rs1000768,0.609  
11,50.626,rs836141,0.690  
11,50.628,rs11032742,0.699  
11,50.632,rs3886899,0.715  
11,50.637,rs16925781,0.715  
11,50.961,rs1024276,0.692  
11,51.012,rs2167906,0.647  
11,51.014,rs286925,0.645  
11,51.020,rs10768085,0.640  
11,51.027,rs7936502,0.682  
11,51.029,rs3794155,0.694  
11,51.097,rs7121272,0.713  
11,51.350,rs2956103,0.820  
11,51.520,rs2732521,0.846  
11,51.551,rs890242,0.840  
11,51.574,rs2732547,0.835  
11,51.641,rs404977,0.765  
11,51.743,rs4756196,0.770  
11,51.749,rs11033019,0.765  
11,51.771,rs10128562,0.742  
11,51.772,rs16927061,0.739  
11,51.773,rs7115768,0.740  
11,51.848,rs10836355,0.731

11,52.026,rs1320443,0.793  
11,52.062,rs7120564,0.790  
11,52.122,rs1923295,0.777  
11,52.124,rs16927467,0.778  
11,52.193,rs11602786,0.786  
11,52.205,rs16927508,0.794  
11,52.219,rs4756234,0.833  
11,52.271,rs589475,0.742  
11,52.276,rs695121,0.739  
11,52.301,rs632358,0.734  
11,52.307,rs697317,0.732  
11,52.345,rs3911014,0.652  
11,52.422,rs697316,0.662  
11,52.605,rs11033260,0.648  
11,52.765,rs2956340,0.545  
11,52.772,rs2956343,0.541  
11,52.775,rs676184,0.540  
11,52.784,rs11827345,0.538  
11,52.803,rs684909,0.532  
11,52.838,rs671658,0.522  
11,52.907,rs4540821,0.506  
11,52.928,rs263096,0.531  
11,52.942,rs2984699,0.550  
11,53.076,rs1499512,0.556  
11,53.090,rs4265577,0.552  
11,53.133,rs3740962,0.500  
11,53.143,rs2030834,0.446  
11,53.154,rs16928390,0.504  
11,53.160,rs10836489,0.490  
11,53.173,rs1961758,0.483  
11,53.214,rs10501145,0.461  
11,53.240,rs867718,0.462  
11,53.279,rs7924470,0.458  
11,53.287,rs12269916,0.467  
11,53.324,rs4755440,0.505  
11,53.491,rs7109505,0.481  
11,53.569,rs11033546,0.465  
11,53.616,rs12419146,0.455  
11,53.623,rs1900337,0.451  
11,53.675,rs2162195,0.408  
11,53.697,rs2554012,0.404  
11,53.704,rs3812774,0.399  
11,53.730,rs4077044,0.380  
11,53.748,rs330260,0.381  
11,53.762,rs7103677,0.378  
11,53.795,rs7107720,0.383  
11,53.820,rs4756316,0.379  
11,53.860,rs11033637,0.352  
11,53.925,rs5030472,0.341  
11,54.260,rs10742376,0.317  
11,54.505,rs11603790,0.303  
11,54.812,rs986996,0.310  
11,54.891,rs4304747,0.312  
11,55.306,rs388750,0.320  
11,55.433,rs2089917,0.318  
11,55.582,rs1512371,0.283  
11,55.663,rs7946463,0.265  
11,55.691,rs11033958,0.265  
11,55.789,rs10768256,0.276  
11,55.796,rs11034021,0.273  
11,55.827,rs2177216,0.260

11,55.955,rs10768268,0.243  
11,56.047,rs1515038,0.236  
11,56.063,rs292801,0.235  
11,56.101,rs292774,0.236  
11,56.134,rs1478762,0.231  
11,56.153,rs4408282,0.214  
11,56.179,rs11034562,0.203  
11,56.241,rs2127541,0.215  
11,56.270,rs11034623,0.225  
11,56.329,rs12420552,0.245  
11,56.390,rs7118523,0.267  
11,56.413,rs10444236,0.277  
11,56.496,rs12279967,0.299  
11,56.511,rs4237674,0.303  
11,56.606,rs4237676,0.326  
11,56.637,rs4315042,0.373  
11,56.811,rs2169415,0.453  
11,56.848,rs12224631,0.469  
11,56.868,rs10768556,0.474  
11,57.004,rs1462183,0.536  
11,57.023,rs7123778,0.536  
11,57.027,rs16934335,0.494  
11,57.037,rs3109384,0.553  
11,57.051,rs2953310,0.549  
11,57.061,rs1381567,0.522  
11,57.080,rs10160235,0.515  
11,57.085,rs11035719,0.511  
11,57.092,rs1020579,0.549  
11,57.094,rs16934668,0.549  
11,57.189,rs7103883,0.540  
11,57.390,rs16934838,0.555  
11,57.480,rs355241,0.558  
11,57.551,rs10837565,0.587  
11,57.569,rs10501249,0.594  
11,57.582,rs7106877,0.598  
11,57.670,rs2902115,0.597  
11,57.727,rs10501259,0.590  
11,57.848,rs10837640,0.594  
11,57.970,rs10768696,0.624  
11,58.038,rs7930633,0.751  
11,58.062,rs10501273,0.756  
11,58.149,rs287756,0.831  
11,58.221,rs7128034,0.826  
11,58.282,rs2862466,0.761  
11,58.354,rs3861059,0.775  
11,58.366,rs16936642,0.777  
11,58.496,rs7114911,0.776  
11,58.557,rs11604506,0.768  
11,58.581,rs7118795,0.758  
11,58.683,rs7125369,0.723  
11,58.730,rs4391804,0.706  
11,58.799,rs7939657,0.650  
11,58.956,rs977439,0.605  
11,59.029,rs7107014,0.607  
11,59.170,rs17510173,0.630  
11,59.195,rs10838120,0.635  
11,59.200,rs16937562,0.636  
11,59.206,rs10400240,0.637  
11,59.214,rs3740981,0.638  
11,59.221,rs11037472,0.637  
11,59.238,rs11037478,0.635

11,59.358,rs10501303,0.618  
11,59.396,rs7932905,0.607  
11,59.565,rs1518820,0.603  
11,59.569,rs11037684,0.603  
11,59.572,rs11037685,0.602  
11,59.588,rs10838191,0.685  
11,59.595,rs2434467,0.718  
11,59.645,rs883856,0.771  
11,59.658,rs7120772,0.772  
11,59.749,rs7942915,0.861  
11,59.765,rs7127815,0.870  
11,59.788,rs3094395,0.852  
11,59.807,rs178503,0.834  
11,59.838,rs3107275,0.774  
11,59.927,rs7111879,0.742  
11,60.407,rs7949067,0.759  
11,60.429,rs10769029,0.747  
11,60.485,rs3853292,0.713  
11,60.504,rs4755809,0.695  
11,60.568,rs4755811,0.772  
11,60.580,rs2220885,0.811  
11,60.645,rs3853291,0.731  
11,60.718,rs746718,0.671  
11,60.832,rs897012,0.633  
11,61.047,rs357938,0.649  
11,61.062,rs6485532,0.648  
11,61.112,rs1560295,0.646  
11,61.359,rs730129,0.649  
11,61.371,rs1981992,0.639  
11,61.393,rs7932712,0.617  
11,61.441,rs3781753,0.516  
11,61.460,rs7935166,0.497  
11,61.471,rs12421108,0.491  
11,61.499,rs4755854,0.484  
11,61.513,rs714679,0.531  
11,61.524,rs12420889,0.533  
11,61.628,rs7935663,0.549  
11,61.637,rs7123370,0.551  
11,61.687,rs4755868,0.544  
11,61.908,rs4394833,0.492  
11,62.523,rs835784,0.318  
11,62.691,rs835750,0.250  
11,62.694,rs1466199,0.248  
11,62.797,rs4755910,0.226  
11,62.810,rs835774,0.233  
11,62.831,rs2902421,0.223  
11,62.869,rs1351848,0.142  
11,62.890,rs10769111,0.107  
11,63.000,rs751198,0.126  
11,63.022,rs11038387,0.130  
11,63.061,rs4755319,0.138  
11,63.071,rs7930399,0.142  
11,63.240,rs1026078,0.217  
11,63.288,rs7106761,0.229  
11,63.331,rs11823366,0.244  
11,63.343,rs11038673,0.247  
11,63.375,rs12281674,0.260  
11,63.446,rs2959101,0.290  
11,63.533,rs2863720,0.307  
11,63.546,rs10437653,0.300  
11,63.654,rs11038993,0.311



11,63.730,rs752849,0.293  
11,63.755,rs7114704,0.288  
11,63.798,rs2242081,0.278  
11,63.812,rs1164681,0.269  
11,63.911,rs11245742,0.221  
11,63.991,rs11228726,0.239  
11,64.036,rs764855,0.245  
11,64.053,rs1792509,0.239  
11,64.125,rs3017569,0.204  
11,64.151,rs17151797,0.192  
11,64.181,rs3781902,0.182  
11,64.191,rs3741089,0.152  
11,64.210,rs2955849,0.163  
11,64.212,rs10792168,0.136  
11,64.347,rs517679,0.238  
11,64.349,rs948559,0.251  
11,64.350,rs667933,0.261  
11,64.356,rs619945,0.295  
11,64.403,rs10896825,0.270  
11,64.467,rs17578360,0.282  
11,64.474,rs524585,0.283  
11,64.478,rs532318,0.284  
11,64.586,rs4411292,0.280  
11,64.627,rs12284698,0.279  
11,64.664,rs11229898,0.278  
11,64.668,rs7949688,0.278  
11,64.763,rs6591536,0.283  
11,64.910,rs7116484,0.259  
11,64.940,rs17154203,0.260  
11,64.955,rs7925914,0.250  
11,64.981,rs559335,0.237  
11,65.025,rs1286386,0.246  
11,65.185,rs667897,0.273  
11,65.325,rs2017549,0.313  
11,65.397,rs2165832,0.315  
11,65.539,rs2000636,0.295  
11,65.651,rs10501386,0.311  
11,65.717,rs11230420,0.315  
11,65.913,rs10736710,0.301  
11,65.925,rs1032939,0.298  
11,65.938,rs4939451,0.301  
11,65.962,rs7120524,0.306  
11,66.064,rs592637,0.261  
11,66.651,rs485639,0.252  
11,66.715,rs473756,0.222  
11,66.846,rs11230553,0.235  
11,66.893,rs2237997,0.233  
11,66.997,rs2905524,0.227  
11,67.150,rs175129,0.219  
11,67.590,rs590494,0.113  
11,67.878,rs17704641,0.087  
11,67.920,rs3019200,0.088  
11,67.941,rs3741260,0.089  
11,67.955,rs1794072,0.089  
11,68.046,rs7931563,0.063  
11,68.081,rs198448,0.055  
11,68.096,rs198462,0.053  
11,68.171,rs174450,0.044  
11,68.203,rs882169,0.033  
11,68.224,rs741886,0.023  
11,68.231,rs2073588,0.023

11,68.252,rs4963442,0.025  
11,68.269,rs10792327,0.020  
11,68.272,rs11230882,0.019  
11,68.344,rs7129085,0.027  
11,68.362,rs1675090,0.031  
11,68.382,rs2463838,0.039  
11,68.514,rs2509973,0.014  
11,68.528,rs17663676,0.013  
11,68.528,rs4084164,0.013  
11,68.534,rs10897276,0.007  
11,68.540,rs2509984,0.005  
11,68.551,rs2513044,0.002  
11,68.563,rs17157338,0.001  
11,68.656,rs11231168,0.000  
11,68.748,rs633742,0.005  
11,68.799,rs12794763,0.011  
11,68.824,rs547248,0.013  
11,68.845,rs1938677,0.015  
11,68.904,rs10897316,0.021  
11,68.943,rs1944047,0.020  
11,69.010,rs1525071,0.016  
11,69.214,rs537473,0.034  
11,69.355,rs948796,0.034  
11,69.391,rs4405320,0.045  
11,69.593,rs503341,0.017  
11,69.612,rs3850942,0.017  
11,69.720,rs11231657,0.015  
11,69.798,rs562750,0.014  
11,69.829,rs715163,0.015  
11,69.970,rs3741403,0.017  
11,69.995,rs2244625,0.011  
11,70.156,rs606063,0.005  
11,70.266,rs3759053,0.004  
11,70.483,rs10897526,-0.001  
11,70.540,rs8855,-0.002  
11,70.612,rs3741392,-0.005  
11,70.613,rs673995,-0.005  
11,70.678,rs7103328,-0.006  
11,70.783,rs1196043,-0.008  
11,70.832,rs1195962,-0.009  
11,71.025,rs681309,-0.011  
11,71.130,rs619586,-0.012  
11,71.306,rs11227259,-0.015  
11,71.391,rs479844,-0.018  
11,71.416,rs11227306,-0.019  
11,71.543,rs1211380,-0.023  
11,71.546,rs754532,-0.024  
11,71.575,rs2576,-0.025  
11,71.697,rs4930351,-0.025  
11,71.984,rs6591226,-0.016  
11,71.984,rs11227623,-0.016  
11,72.063,rs11227678,-0.010  
11,72.135,rs3741189,-0.007  
11,72.170,rs1944096,-0.005  
11,72.299,rs308328,-0.000  
11,72.361,rs3794186,-0.000  
11,72.471,rs2129848,0.000  
11,72.817,rs312783,-0.000  
11,73.095,rs2472429,-0.000  
11,73.320,rs12804775,-0.000  
11,73.606,rs3136537,-0.000

11,73.871,rs4930248,-0.000  
11,73.885,rs2924674,-0.000  
11,74.169,rs685320,-0.000  
11,74.297,rs10896389,0.000  
11,74.353,rs3862397,0.000  
11,74.421,rs17399246,0.000  
11,74.557,rs1005858,-0.000  
11,74.652,rs11603027,-0.000  
11,74.668,rs11228515,-0.000  
11,74.714,rs3019751,0.000  
11,74.882,rs7931342,0.001  
11,74.943,rs7118204,0.000  
11,75.022,rs11602680,0.000  
11,75.304,rs4326823,0.005  
11,75.409,rs4980777,0.010  
11,75.441,rs4980598,0.012  
11,75.474,rs7927237,0.014  
11,75.491,rs10908183,0.013  
11,75.530,rs10501399,0.010  
11,75.559,rs3740643,0.020  
11,75.681,rs498931,0.018  
11,75.774,rs17318844,0.017  
11,75.832,rs1982774,0.024  
11,75.864,rs649392,0.029  
11,75.870,rs7178,0.028  
11,75.934,rs948992,0.015  
11,75.963,rs11263535,0.013  
11,75.993,rs7105655,0.010  
11,76.040,rs871346,0.004  
11,76.089,rs4980700,0.002  
11,76.096,rs734102,0.002  
11,76.167,rs6598087,0.001  
11,76.183,rs7481015,0.000  
11,76.210,rs7950402,0.000  
11,76.373,rs7926926,0.003  
11,76.386,rs4980704,0.003  
11,76.414,rs4980573,0.001  
11,76.446,rs7927315,0.001  
11,76.462,rs7947135,0.001  
11,76.540,rs744205,0.002  
11,76.544,rs2515284,0.001  
11,76.581,rs9666157,0.001  
11,76.600,rs2515258,0.000  
11,76.608,rs2509172,0.000  
11,76.651,rs875106,-0.000  
11,76.653,rs10793022,-0.000  
11,76.809,rs7118496,-0.002  
11,77.351,rs682670,-0.038  
11,77.426,rs11236566,-0.040  
11,77.436,rs4980608,-0.033  
11,77.456,rs7106631,-0.029  
11,77.485,rs7945862,-0.031  
11,77.507,rs4980543,-0.038  
11,77.515,rs12225113,-0.039  
11,77.546,rs515458,-0.036  
11,77.625,rs1783611,-0.024  
11,77.670,rs10899444,-0.023  
11,77.678,rs1562191,-0.023  
11,77.743,rs7946750,-0.019  
11,77.798,rs7927376,-0.019  
11,77.847,rs4944840,-0.017

11,77.885,rs11604398,-0.010  
11,77.902,rs7124405,-0.015  
11,77.910,rs3934692,-0.017  
11,77.928,rs7929059,-0.022  
11,77.950,rs2919721,-0.024  
11,78.081,rs3763856,-0.000  
11,78.185,rs7934055,0.003  
11,78.200,rs7937196,0.004  
11,78.261,rs7102783,0.007  
11,78.428,rs661242,0.005  
11,78.637,rs522381,0.009  
11,78.691,rs11235468,0.010  
11,78.749,rs638138,0.008  
11,78.793,rs1160142,0.008  
11,78.825,rs4943909,0.008  
11,78.832,rs163607,0.008  
11,78.845,rs341093,0.007  
11,78.850,rs12418204,0.007  
11,78.853,rs341081,0.007  
11,78.855,rs7122222,0.007  
11,78.857,rs341069,0.007  
11,78.878,rs341086,0.011  
11,79.074,rs1157343,0.001  
11,79.119,rs10793039,0.001  
11,79.257,rs1000620,0.001  
11,79.692,rs10898894,0.003  
11,80.095,rs1791936,0.005  
11,80.157,rs3931643,-0.001  
11,80.165,rs11235676,-0.001  
11,80.177,rs523907,-0.000  
11,80.224,rs12364461,0.000  
11,80.230,rs1790080,0.000  
11,80.265,rs4382936,0.001  
11,80.337,rs2027765,-0.000  
11,80.467,rs513268,-0.003  
11,80.677,rs655717,-0.005  
11,80.690,rs3781907,-0.005  
11,80.874,rs3862800,-0.011  
11,80.880,rs9516,-0.011  
11,80.883,rs4944893,-0.010  
11,80.926,rs7941941,-0.000  
11,80.963,rs7932922,0.002  
11,80.979,rs2000924,0.003  
11,80.983,rs4539352,0.004  
11,80.989,rs1433769,0.007  
11,81.022,rs572656,0.008  
11,81.074,rs590105,0.010  
11,81.173,rs10899076,0.020  
11,81.178,rs17133760,0.023  
11,81.180,rs3819192,0.024  
11,81.180,rs1789694,0.024  
11,81.183,rs472112,0.029  
11,81.183,rs685929,0.029  
11,81.184,rs616714,0.031  
11,81.184,rs2510894,0.033  
11,81.185,rs12289289,0.037  
11,81.186,rs479574,0.049  
11,81.188,rs12788428,0.063  
11,81.294,rs540461,0.111  
11,81.565,rs11236561,0.126  
11,81.720,rs1995892,0.133

11,82.020,rs660211,0.141  
11,82.134,rs7945646,0.155  
11,82.138,rs664499,0.156  
11,82.143,rs582132,0.157  
11,82.264,rs631948,0.179  
11,82.302,rs4945061,0.187  
11,82.381,rs745870,0.197  
11,82.388,rs12295401,0.198  
11,82.530,rs7938584,0.203  
11,82.731,rs2508746,0.189  
11,82.797,rs10751256,0.193  
11,82.823,rs11824655,0.196  
11,82.860,rs1892952,0.202  
11,82.866,rs4945097,0.203  
11,82.882,rs10899249,0.237  
11,82.926,rs7127747,0.280  
11,82.937,rs4619182,0.292  
11,82.948,rs11601880,0.258  
11,82.955,rs1941600,0.271  
11,82.962,rs7118888,0.248  
11,82.985,rs873108,0.251  
11,83.066,rs10899285,0.257  
11,83.067,rs1149622,0.256  
11,83.120,rs1225138,0.223  
11,83.275,rs12797610,0.146  
11,83.356,rs12421551,0.112  
11,83.379,rs1043418,0.102  
11,83.380,rs7943716,0.102  
11,83.424,rs7930391,0.083  
11,83.462,rs12793189,0.091  
11,83.617,rs3019238,0.128  
11,83.759,rs10899420,0.167  
11,83.763,rs921383,0.172  
11,83.766,rs3824865,0.173  
11,83.795,rs230665,0.211  
11,83.795,rs230662,0.212  
11,83.795,rs230661,0.211  
11,83.799,rs2450132,0.183  
11,83.840,rs4945276,0.159  
11,83.844,rs683420,0.160  
11,84.106,rs597327,0.189  
11,84.494,rs1792137,0.213  
11,84.898,rs1941378,0.251  
11,85.210,rs531767,0.339  
11,85.240,rs750878,0.340  
11,85.290,rs892857,0.342  
11,85.316,rs587767,0.339  
11,85.376,rs1821616,0.363  
11,85.386,rs11826637,0.367  
11,85.398,rs2016337,0.371  
11,85.415,rs4255563,0.377  
11,85.446,rs10793359,0.425  
11,85.490,rs7114639,0.375  
11,85.543,rs7118942,0.373  
11,85.543,rs7119070,0.373  
11,85.570,rs501435,0.383  
11,85.581,rs4359232,0.392  
11,85.641,rs1938821,0.417  
11,85.646,rs10501435,0.419  
11,85.673,rs522783,0.377  
11,85.681,rs616214,0.354

11,85.691,rs1011311,0.315  
11,85.702,rs486694,0.274  
11,85.850,rs11604024,0.247  
11,85.858,rs517684,0.246  
11,85.959,rs519985,0.332  
11,86.076,rs1912702,0.354  
11,86.125,rs7112396,0.389  
11,86.144,rs3935311,0.398  
11,86.165,rs7944323,0.402  
11,86.307,rs1944720,0.447  
11,86.336,rs17138648,0.455  
11,86.339,rs4944237,0.455  
11,86.414,rs528643,0.447  
11,86.526,rs2253740,0.436  
11,86.585,rs1944962,0.444  
11,86.623,rs2663203,0.456  
11,87.254,rs636471,0.361  
11,87.290,rs486935,0.357  
11,87.335,rs956168,0.324  
11,87.352,rs11238074,0.328  
11,87.358,rs17631231,0.331  
11,87.365,rs680999,0.335  
11,87.436,rs12793583,0.427  
11,87.443,rs2141418,0.430  
11,87.475,rs1261938,0.437  
11,87.518,rs1151207,0.440  
11,87.540,rs7926854,0.434  
11,87.551,rs990648,0.432  
11,87.582,rs2512483,0.429  
11,87.594,rs2448276,0.425  
11,87.596,rs2512509,0.421  
11,87.607,rs2512514,0.395  
11,87.621,rs1037399,0.375  
11,87.650,rs2198256,0.374  
11,87.685,rs965716,0.355  
11,87.737,rs4945424,0.368  
11,87.767,rs2373551,0.355  
11,87.800,rs7937935,0.346  
11,87.855,rs1917873,0.357  
11,87.888,rs1398450,0.363  
11,87.896,rs11232339,0.364  
11,87.925,rs17140931,0.366  
11,87.925,rs17140936,0.366  
11,87.931,rs11232369,0.365  
11,87.979,rs1909136,0.351  
11,87.986,rs1391529,0.349  
11,87.994,rs12803794,0.357  
11,88.049,rs11232428,0.400  
11,88.050,rs1566240,0.401  
11,88.053,rs1391530,0.401  
11,88.104,rs1403257,0.408  
11,88.127,rs17141455,0.396  
11,88.156,rs1568635,0.375  
11,88.164,rs2512098,0.370  
11,88.202,rs7102147,0.369  
11,88.270,rs2032408,0.353  
11,88.277,rs2446116,0.339  
11,88.289,rs12418411,0.346  
11,88.337,rs1458082,0.365  
11,88.380,rs3911554,0.301  
11,88.435,rs4944303,0.302

11,88.439,rs10792573,0.300  
11,88.469,rs7107748,0.291  
11,88.510,rs6592004,0.263  
11,88.538,rs1459951,0.252  
11,88.539,rs11607964,0.252  
11,88.550,rs7950689,0.283  
11,88.562,rs11232919,0.286  
11,88.731,rs666649,0.307  
11,88.757,rs644497,0.314  
11,88.758,rs11607467,0.314  
11,88.829,rs581701,0.286  
11,88.924,rs679930,0.288  
11,89.100,rs1125757,0.283  
11,89.198,rs10897991,0.266  
11,89.200,rs1939593,0.266  
11,89.203,rs7947279,0.244  
11,89.204,rs1784206,0.240  
11,89.206,rs7940296,0.240  
11,89.206,rs7125061,0.240  
11,89.220,rs11233398,0.217  
11,89.227,rs7936604,0.207  
11,89.227,rs2010435,0.207  
11,89.231,rs665714,0.208  
11,89.417,rs2163612,0.228  
11,89.474,rs7928931,0.243  
11,89.544,rs17145887,0.261  
11,89.561,rs654217,0.265  
11,89.596,rs7111226,0.273  
11,89.642,rs7479949,0.270  
11,89.676,rs1878266,0.271  
11,89.685,rs1914204,0.240  
11,89.687,rs2037197,0.239  
11,89.692,rs17486172,0.243  
11,89.693,rs3793953,0.244  
11,89.732,rs790379,0.242  
11,89.736,rs2374465,0.239  
11,89.785,rs11233872,0.204  
11,89.804,rs4944457,0.201  
11,89.863,rs11233907,0.199  
11,89.982,rs2054024,0.232  
11,89.991,rs4944478,0.225  
11,90.015,rs3896313,0.207  
11,90.066,rs7127845,0.212  
11,90.130,rs1430953,0.251  
11,90.156,rs1940100,0.273  
11,90.157,rs1940080,0.272  
11,90.178,rs1943701,0.207  
11,90.182,rs11234189,0.211  
11,90.184,rs17206578,0.216  
11,90.189,rs10501574,0.229  
11,90.195,rs10501579,0.215  
11,90.200,rs7127610,0.202  
11,90.201,rs2155413,0.202  
11,90.221,rs634050,0.227  
11,90.317,rs12099145,0.241  
11,90.345,rs10898409,0.242  
11,90.350,rs11234429,0.243  
11,90.370,rs6592289,0.260  
11,90.392,rs292103,0.275  
11,90.483,rs3741007,0.230  
11,90.567,rs10898483,0.232

11,90.850,rs10898501,0.260  
11,90.916,rs4382935,0.253  
11,91.143,rs7940187,0.219  
11,91.199,rs642245,0.211  
11,91.230,rs1938930,0.198  
11,91.236,rs7129626,0.197  
11,91.285,rs2433435,0.187  
11,91.444,rs12285365,0.232  
11,91.462,rs947884,0.240  
11,91.487,rs10501631,0.270  
11,91.506,rs7104996,0.258  
11,91.513,rs2212766,0.254  
11,91.536,rs4943964,0.236  
11,91.621,rs11234901,0.237  
11,91.757,rs11234962,0.242  
11,91.801,rs655050,0.280  
11,91.926,rs644471,0.306  
11,92.037,rs12282551,0.297  
11,92.066,rs2003177,0.283  
11,92.180,rs7935389,0.267  
11,92.218,rs10898722,0.221  
11,92.243,rs7931829,0.222  
11,92.323,rs2212407,0.253  
11,92.325,rs11825065,0.253  
11,92.336,rs4944792,0.275  
11,92.337,rs10501656,0.272  
11,92.337,rs7926453,0.274  
11,92.342,rs609569,0.247  
11,92.342,rs655649,0.246  
11,92.345,rs490589,0.219  
11,92.348,rs302653,0.210  
11,92.349,rs11018795,0.209  
11,92.352,rs633716,0.202  
11,92.354,rs11019225,0.203  
11,92.355,rs538047,0.203  
11,92.362,rs308857,0.227  
11,92.362,rs308870,0.243  
11,92.364,rs2513423,0.243  
11,92.366,rs178244,0.244  
11,92.427,rs6483413,0.164  
11,92.443,rs7119749,0.156  
11,92.561,rs10830204,0.173  
11,92.659,rs1939255,0.192  
11,92.707,rs317150,0.172  
11,92.721,rs1875565,0.165  
11,92.776,rs2917538,0.166  
11,93.052,rs647248,0.245  
11,93.057,rs3740818,0.246  
11,93.325,rs484213,0.262  
11,93.377,rs12363417,0.207  
11,93.381,rs10128721,0.204  
11,93.469,rs482463,0.200  
11,93.536,rs7926034,0.172  
11,93.554,rs2511317,0.165  
11,93.573,rs12225964,0.157  
11,93.708,rs11828730,0.103  
11,93.732,rs4483549,0.094  
11,93.737,rs4073197,0.093  
11,93.792,rs11019417,0.063  
11,93.809,rs12272958,0.055  
11,93.809,rs11820998,0.055



11,93.820,rs587473,0.051  
11,93.872,rs2514316,0.041  
11,93.943,rs12420217,0.034  
11,93.953,rs10830766,0.033  
11,93.987,rs1881289,0.028  
11,94.010,rs7115718,0.015  
11,94.030,rs12294567,0.015  
11,94.037,rs16916699,0.018  
11,94.055,rs2201119,0.024  
11,94.070,rs7940613,0.025  
11,94.173,rs10830834,0.015  
11,94.375,rs10830888,0.005  
11,94.437,rs1993543,0.009  
11,94.456,rs2513466,0.006  
11,94.519,rs10501779,0.009  
11,94.649,rs1941438,0.011  
11,94.651,rs10501790,0.011  
11,94.693,rs605714,0.013  
11,94.747,rs568629,0.015  
11,94.888,rs10501795,0.024  
11,94.981,rs10741444,0.031  
11,95.064,rs7118248,0.036  
11,95.094,rs1387154,0.050  
11,95.106,rs737383,0.065  
11,95.106,rs4526739,0.065  
11,95.132,rs2166706,0.048  
11,95.146,rs4601728,0.046  
11,95.225,rs621310,0.033  
11,95.225,rs7931462,0.033  
11,95.253,rs3018133,0.027  
11,95.275,rs614332,0.021  
11,95.298,rs11020171,0.023  
11,95.320,rs2121468,0.023  
11,95.338,rs10831027,0.021  
11,95.357,rs2605579,0.020  
11,95.367,rs2658785,0.019  
11,95.373,rs2608280,0.018  
11,95.408,rs1954783,0.023  
11,95.446,rs1284108,0.022  
11,95.460,rs585768,0.022  
11,95.513,rs2462741,0.024  
11,95.652,rs4073612,0.026  
11,95.746,rs11826531,0.025  
11,95.806,rs669634,0.025  
11,95.854,rs481597,0.054  
11,95.897,rs3740864,0.059  
11,95.914,rs6483341,0.059  
11,96.052,rs11020819,0.044  
11,96.108,rs7119735,0.045  
11,96.120,rs1940640,0.045  
11,96.252,rs10501816,0.043  
11,96.471,rs689825,0.027  
11,96.573,rs10501819,0.019  
11,96.668,rs11602904,0.012  
11,96.735,rs655070,0.014  
11,96.782,rs547243,0.024  
11,96.835,rs586421,0.029  
11,96.877,rs12574604,0.032  
11,96.879,rs682533,0.032  
11,96.880,rs11021055,0.032  
11,96.910,rs684856,0.018

11,96.928,rs646667,0.022  
11,96.952,rs626481,0.028  
11,97.040,rs1073059,0.039  
11,97.051,rs11021100,0.040  
11,97.053,rs9667295,0.041  
11,97.104,rs976337,0.045  
11,97.340,rs4121863,0.076  
11,97.379,rs541821,0.085  
11,97.414,rs3937019,0.104  
11,97.436,rs11021168,0.115  
11,97.510,rs4237572,0.110  
11,97.519,rs4237573,0.110  
11,97.521,rs16922018,0.110  
11,97.543,rs12280779,0.111  
11,97.580,rs4121809,0.105  
11,97.627,rs7943143,0.105  
11,97.654,rs4409785,0.102  
11,97.683,rs2254634,0.098  
11,97.741,rs7938474,0.074  
11,97.775,rs7947022,0.074  
11,97.787,rs1150347,0.074  
11,97.838,rs7931238,0.074  
11,97.859,rs1939875,0.067  
11,97.862,rs1939888,0.066  
11,97.894,rs7102303,0.042  
11,97.906,rs11021295,0.039  
11,97.981,rs1727164,0.041  
11,97.981,rs1569057,0.041  
11,98.190,rs2155436,0.050  
11,98.339,rs10741525,0.064  
11,98.416,rs7104987,0.074  
11,98.448,rs16922803,0.078  
11,98.491,rs4144614,0.085  
11,98.549,rs687782,0.092  
11,98.566,rs10831469,0.094  
11,98.691,rs7104859,0.110  
11,98.847,rs4531427,0.115  
11,98.953,rs479825,0.118  
11,99.001,rs483333,0.116  
11,99.028,rs522495,0.118  
11,99.044,rs566519,0.133  
11,99.047,rs693182,0.136  
11,99.074,rs11021494,0.114  
11,99.115,rs892685,0.084  
11,99.209,rs6483496,0.086  
11,99.271,rs4753196,0.089  
11,99.549,rs12286856,0.099  
11,99.680,rs618929,0.103  
11,100.263,rs4594032,0.125  
11,100.542,rs3019724,0.131  
11,100.713,rs1982437,0.174  
11,100.751,rs11224253,0.189  
11,100.758,rs2096735,0.203  
11,100.764,rs7952525,0.214  
11,100.767,rs7106102,0.213  
11,100.775,rs4754723,0.210  
11,100.814,rs1580678,0.202  
11,100.830,rs17129910,0.215  
11,100.831,rs984675,0.216  
11,100.832,rs1690587,0.217  
11,100.833,rs12224055,0.217

11,100.881,rs1426640,0.212  
11,100.908,rs1840054,0.199  
11,100.935,rs1452670,0.193  
11,100.957,rs1970747,0.197  
11,100.965,rs7940229,0.197  
11,101.003,rs649985,0.196  
11,101.024,rs1039953,0.209  
11,101.041,rs10890801,0.220  
11,101.049,rs2897122,0.220  
11,101.067,rs2897197,0.223  
11,101.176,rs2597630,0.235  
11,101.369,rs667679,0.194  
11,101.395,rs4121681,0.192  
11,101.455,rs2509867,0.189  
11,101.509,rs4581411,0.187  
11,101.755,rs7944403,0.170  
11,101.906,rs7122788,0.154  
11,102.006,rs10891845,0.160  
11,102.014,rs11215568,0.162  
11,102.035,rs1482224,0.169  
11,102.111,rs1482219,0.178  
11,102.145,rs11604245,0.162  
11,102.150,rs10891978,0.156  
11,102.174,rs1461688,0.057  
11,102.279,rs7939244,0.060  
11,102.314,rs282494,0.061  
11,102.349,rs7930825,0.065  
11,102.370,rs1504708,0.068  
11,102.376,rs11219732,0.070  
11,102.406,rs2656219,0.077  
11,102.412,rs9919649,0.079  
11,102.506,rs3133442,0.103  
11,102.576,rs2726379,0.106  
11,102.625,rs12789908,0.107  
11,102.709,rs631773,0.130  
11,102.728,rs17134252,0.135  
11,102.742,rs2010606,0.130  
11,102.753,rs7111400,0.125  
11,102.757,rs12807115,0.119  
11,102.779,rs1939374,0.090  
11,102.844,rs12280616,0.085  
11,102.905,rs7931411,0.080  
11,102.922,rs1596306,0.079  
11,102.934,rs11221872,0.079  
11,102.943,rs7952312,0.078  
11,102.998,rs10082676,0.075  
11,103.011,rs4753962,0.074  
11,103.015,rs7933349,0.074  
11,103.080,rs7933249,0.076  
11,103.118,rs7929129,0.076  
11,103.245,rs6590789,0.076  
11,103.279,rs1942109,0.077  
11,103.453,rs639494,0.080  
11,103.462,rs11224313,0.079  
11,103.482,rs601727,0.085  
11,103.499,rs11224328,0.080  
11,103.563,rs7350545,0.063  
11,103.579,rs7107791,0.074  
11,103.969,rs568157,0.002  
11,103.996,rs7936649,0.003  
11,103.997,rs1943760,0.005

11,103.998,rs1943761,0.005  
11,104.035,rs7948300,0.005  
11,104.046,rs4272759,0.005  
11,104.048,rs7106085,0.004  
11,104.077,rs1938859,0.005  
11,104.128,rs1939047,0.004  
11,104.220,rs1441928,0.003  
11,104.246,rs11225089,0.002  
11,104.308,rs17097403,0.002  
11,104.376,rs1942683,0.001  
11,104.387,rs17689778,0.001  
11,104.392,rs1894116,0.001  
11,104.436,rs10501996,-0.000  
11,104.444,rs2846844,-0.000  
11,104.476,rs1055088,-0.001  
11,104.573,rs651853,-0.011  
11,104.580,rs11225285,-0.013  
11,104.585,rs643281,-0.013  
11,104.587,rs7945819,-0.014  
11,104.589,rs2156528,-0.014  
11,104.602,rs11603486,-0.015  
11,104.605,rs12418815,-0.015  
11,104.610,rs4754854,-0.015  
11,104.641,rs3781788,-0.015  
11,104.656,rs948138,-0.016  
11,104.712,rs1940475,-0.016  
11,104.720,rs10791591,-0.016  
11,104.732,rs17099492,-0.019  
11,104.754,rs470747,-0.027  
11,104.759,rs498186,-0.039  
11,104.778,rs1010698,-0.050  
11,104.800,rs651159,-0.052  
11,104.845,rs11826440,-0.055  
11,104.859,rs687558,-0.059  
11,104.861,rs10791605,-0.059  
11,104.893,rs608645,-0.059  
11,104.974,rs11225571,-0.063  
11,105.146,rs519773,-0.070  
11,105.216,rs11828980,-0.090  
11,105.225,rs10895461,-0.091  
11,105.227,rs1946017,-0.089  
11,105.246,rs10895475,-0.073  
11,105.247,rs17101182,-0.073  
11,105.253,rs7944909,-0.075  
11,105.263,rs10488759,-0.075  
11,105.270,rs2198123,-0.089  
11,105.371,rs1531837,-0.051  
11,105.389,rs7104359,-0.049  
11,105.413,rs11226048,-0.049  
11,105.424,rs512138,-0.048  
11,105.431,rs720171,-0.049  
11,105.434,rs532445,-0.049  
11,105.480,rs260836,-0.050  
11,105.513,rs260808,-0.046  
11,105.515,rs1818106,-0.045  
11,105.519,rs260818,-0.071  
11,105.522,rs361315,-0.067  
11,105.542,rs361281,-0.024  
11,105.552,rs361291,-0.018  
11,105.571,rs361268,-0.016  
11,105.770,rs658468,-0.022

11,105.899,rs1147018,-0.023  
11,106.114,rs7125155,-0.014  
11,106.118,rs633782,-0.014  
11,106.126,rs7949293,-0.014  
11,106.145,rs480550,-0.014  
11,106.203,rs1613367,-0.015  
11,106.246,rs1785864,-0.014  
11,106.370,rs17103984,-0.013  
11,106.374,rs11600433,-0.013  
11,106.579,rs1009820,-0.012  
11,106.634,rs1445617,-0.012  
11,106.718,rs672673,-0.011  
11,106.736,rs1939153,-0.011  
11,106.818,rs17093811,-0.015  
11,106.820,rs2155345,-0.015  
11,106.843,rs11226922,-0.017  
11,106.978,rs4755149,-0.029  
11,107.003,rs1512436,-0.025  
11,107.015,rs7943420,-0.014  
11,107.017,rs2511418,-0.014  
11,107.019,rs10502070,-0.013  
11,107.052,rs1791468,-0.014  
11,107.055,rs1945062,-0.014  
11,107.077,rs4754161,-0.015  
11,107.101,rs2187509,-0.003  
11,107.110,rs1791587,-0.000  
11,107.116,rs7104111,0.000  
11,107.128,rs11211867,0.000  
11,107.133,rs597384,0.000  
11,107.350,rs17564612,-0.003  
11,107.371,rs7926602,-0.005  
11,107.416,rs11602728,-0.006  
11,107.482,rs614594,-0.006  
11,107.587,rs654093,-0.007  
11,107.647,rs1939900,-0.014  
11,107.653,rs7123473,-0.014  
11,107.662,rs1939894,-0.014  
11,107.698,rs10890750,-0.015  
11,107.700,rs7950899,-0.014  
11,107.733,rs7105672,-0.016  
11,107.747,rs7116354,-0.017  
11,107.794,rs502398,-0.020  
11,107.835,rs2847190,-0.024  
11,107.861,rs7930340,-0.023  
11,107.891,rs4028250,-0.022  
11,107.901,rs12574834,-0.021  
11,108.057,rs4987876,-0.022  
11,108.100,rs609261,-0.023  
11,108.217,rs10890845,-0.019  
11,108.250,rs2846412,-0.020  
11,108.315,rs4539291,-0.013  
11,108.350,rs2306118,-0.012  
11,108.541,rs11212826,-0.027  
11,108.573,rs10890920,-0.026  
11,108.583,rs1974953,-0.017  
11,108.612,rs1949050,-0.017  
11,108.630,rs10789713,-0.016  
11,108.660,rs1509731,-0.015  
11,108.707,rs10890960,-0.031  
11,108.835,rs618316,-0.049  
11,109.016,rs1837396,-0.046

11,109.291,rs1368688,-0.040  
11,109.425,rs7126496,-0.050  
11,109.465,rs7947141,-0.054  
11,109.467,rs1789395,-0.038  
11,109.488,rs1789374,-0.025  
11,109.506,rs1648131,-0.025  
11,109.514,rs7951918,-0.024  
11,109.549,rs660222,-0.023  
11,109.642,rs1676522,-0.026  
11,109.660,rs12420766,-0.026  
11,109.797,rs2136361,-0.020  
11,109.863,rs95596,-0.015  
11,109.987,rs2432703,-0.008  
11,110.019,rs929908,-0.005  
11,110.046,rs6589200,-0.001  
11,110.055,rs11213674,-0.000  
11,110.062,rs4643108,-0.003  
11,110.082,rs978769,-0.001  
11,110.113,rs321418,-0.002  
11,110.133,rs12291189,-0.002  
11,110.153,rs2000907,-0.000  
11,110.166,rs10502138,-0.000  
11,110.170,rs6589213,-0.000  
11,110.178,rs10891238,-0.000  
11,110.200,rs11213819,0.002  
11,110.210,rs1046872,0.002  
11,110.225,rs7117229,0.001  
11,110.249,rs7952176,0.001  
11,110.265,rs7930326,0.001  
11,110.348,rs11213917,-0.000  
11,110.622,rs4938792,-0.001  
11,111.779,rs627441,-0.013  
11,112.002,rs360726,-0.013  
11,112.128,rs1946518,-0.015  
11,112.207,rs7105056,-0.016  
11,112.264,rs2250417,-0.016  
11,112.431,rs7103894,-0.020  
11,112.533,rs4937257,-0.022  
11,112.583,rs940756,-0.024  
11,112.622,rs7933113,-0.026  
11,112.624,rs4937422,-0.026  
11,112.630,rs7946315,-0.027  
11,112.665,rs4272816,-0.031  
11,112.694,rs1459658,-0.035  
11,112.698,rs473990,-0.035  
11,112.700,rs321125,-0.036  
11,112.707,rs4937686,-0.027  
11,112.749,rs7938281,-0.030  
11,112.765,rs2175519,-0.031  
11,112.817,rs4937786,-0.038  
11,113.054,rs4937993,-0.063  
11,113.087,rs7939805,-0.064  
11,113.144,rs17115184,-0.059  
11,113.171,rs584427,-0.056  
11,113.174,rs12279261,-0.053  
11,113.185,rs7130671,-0.062  
11,113.188,rs12794326,-0.060  
11,113.195,rs10891524,-0.048  
11,113.205,rs2288158,-0.049  
11,113.207,rs2298703,-0.049  
11,113.226,rs4559717,-0.040

11,113.229,rs660361,-0.039  
11,113.276,rs723077,-0.040  
11,113.370,rs12422191,-0.036  
11,113.410,rs2734838,-0.035  
11,113.548,rs7131056,-0.029  
11,113.620,rs10891556,-0.029  
11,113.627,rs11214654,-0.029  
11,113.810,rs7123697,-0.022  
11,113.880,rs4132966,-0.019  
11,113.881,rs7940164,-0.019  
11,114.192,rs2886189,-0.010  
11,114.578,rs11604602,-0.009  
11,114.900,rs10789980,-0.005  
11,114.905,rs1150226,-0.005  
11,114.925,rs897685,-0.005  
11,114.953,rs7118530,-0.006  
11,114.955,rs1563533,-0.006  
11,114.998,rs2509220,-0.003  
11,115.016,rs7113940,-0.001  
11,115.021,rs1791807,-0.001  
11,115.064,rs238896,0.000  
11,115.069,rs7116229,-0.000  
11,115.084,rs10488695,-0.001  
11,115.089,rs595641,-0.000  
11,115.118,rs585287,-0.000  
11,115.156,rs656269,-0.000  
11,115.164,rs672455,-0.000  
11,115.171,rs378331,0.000  
11,115.179,rs370634,-0.000  
11,115.200,rs530532,0.000  
11,115.201,rs12793024,0.000  
11,115.204,rs12573952,0.000  
11,115.209,rs2511153,0.000  
11,115.236,rs4938087,-0.000  
11,115.238,rs2604294,-0.000  
11,115.346,rs6589426,-0.004  
11,115.379,rs591013,-0.001  
11,115.401,rs688101,-0.001  
11,115.485,rs566531,-0.001  
11,115.967,rs1712790,-0.006  
11,116.041,rs10891749,-0.007  
11,116.082,rs12287008,-0.007  
11,116.303,rs1403944,-0.003  
11,116.346,rs1403947,-0.007  
11,116.487,rs11215671,-0.007  
11,116.515,rs10891888,-0.007  
11,116.621,rs6589499,-0.005  
11,116.644,rs11215687,-0.010  
11,116.817,rs2186703,-0.008  
11,116.906,rs367164,-0.007  
11,117.045,rs11215750,-0.003  
11,117.125,rs11215766,-0.002  
11,117.216,rs1648364,-0.000  
11,117.288,rs491198,0.001  
11,117.331,rs1783229,0.003  
11,117.390,rs1783219,0.003  
11,117.415,rs1783238,0.003  
11,117.487,rs4471467,0.000  
11,117.512,rs7122088,0.000  
11,117.547,rs4936337,-0.000  
11,117.601,rs2367635,-0.003

11,117.644,rs7103346,-0.004  
11,117.821,rs10502215,-0.008  
11,117.828,rs526151,-0.008  
11,117.846,rs487962,-0.006  
11,117.903,rs4938268,-0.001  
11,117.915,rs553344,-0.000  
11,117.932,rs576670,0.000  
11,117.973,rs2174880,0.000  
11,117.986,rs532107,-0.000  
11,117.991,rs11215936,-0.001  
11,118.022,rs12418858,-0.007  
11,118.027,rs513083,-0.008  
11,118.081,rs573554,-0.019  
11,118.109,rs925151,-0.023  
11,118.132,rs1508102,-0.027  
11,118.141,rs1039755,-0.029  
11,118.169,rs4936353,-0.042  
11,118.258,rs7943240,-0.058  
11,118.286,rs10790151,-0.058  
11,118.314,rs11216029,-0.030  
11,118.369,rs507262,-0.019  
11,118.401,rs947987,-0.017  
11,118.430,rs506305,-0.017  
11,118.670,rs918144,-0.018  
11,118.671,rs10488698,-0.018  
11,119.708,rs500389,-0.002  
11,119.848,rs12282721,-0.003  
11,119.927,rs676134,-0.003  
11,120.213,rs4938377,0.003  
11,120.222,rs3889570,0.003  
11,120.258,rs4938379,0.000  
11,120.270,rs2511050,-0.000  
11,120.276,rs587443,-0.000  
11,120.287,rs597686,0.000  
11,120.300,rs4936383,0.000  
11,120.355,rs557940,0.000  
11,120.396,rs11216466,0.000  
11,120.404,rs11824398,0.000  
11,120.425,rs11216474,0.001  
11,120.429,rs7949956,0.001  
11,120.440,rs10892147,0.001  
11,120.464,rs7942751,0.000  
11,120.472,rs1942924,0.001  
11,120.492,rs11216509,0.001  
11,120.505,rs11216517,0.002  
11,120.527,rs4576856,0.002  
11,120.544,rs10790208,0.002  
11,120.545,rs7945999,0.003  
11,120.565,rs3819132,0.010  
11,120.583,rs635706,0.008  
11,120.587,rs11216567,0.007  
11,120.588,rs4472969,0.007  
11,120.594,rs3087563,0.003  
11,120.598,rs473057,0.007  
11,120.600,rs6589624,0.012  
11,120.610,rs2853009,0.085  
11,120.654,rs2277289,0.118  
11,120.704,rs1561966,0.146  
11,121.011,rs10736492,0.147  
11,121.157,rs573905,0.135  
11,121.394,rs523604,0.125



11,121.443,rs11217091,0.123  
11,121.511,rs4938603,0.101  
11,121.582,rs11217128,0.069  
11,121.616,rs1003081,0.065  
11,121.663,rs582688,0.061  
11,121.820,rs1815811,0.057  
11,121.974,rs2511834,0.060  
11,121.986,rs6649,0.060  
11,121.994,rs10790289,0.060  
11,122.016,rs2195525,0.056  
11,122.174,rs891292,0.071  
11,122.275,rs2887245,0.038  
11,122.286,rs11217340,0.038  
11,122.361,rs11217364,0.042  
11,122.380,rs4409838,0.039  
11,122.382,rs4438048,0.039  
11,122.398,rs12797352,0.036  
11,122.641,rs7131676,0.006  
11,122.743,rs10892470,0.002  
11,122.788,rs1007369,0.000  
11,122.851,rs1665778,0.001  
11,122.871,rs509733,0.001  
11,122.954,rs509809,-0.000  
11,123.042,rs10892502,-0.000  
11,123.070,rs4245210,-0.001  
11,123.202,rs655929,-0.003  
11,123.290,rs4936507,-0.003  
11,123.348,rs617320,-0.003  
11,123.409,rs606970,-0.003  
11,123.438,rs666432,-0.003  
11,123.543,rs579368,-0.001  
11,123.766,rs10892559,0.003  
11,123.813,rs11605781,0.004  
11,123.874,rs4938800,0.003  
11,123.939,rs632137,0.002  
11,124.112,rs2276035,0.001  
11,124.169,rs2247168,0.000  
11,124.205,rs2252359,0.000  
11,124.374,rs7924948,-0.001  
11,124.376,rs7928903,-0.003  
11,124.377,rs1574249,-0.004  
11,124.379,rs12295761,-0.004  
11,124.425,rs7928347,-0.004  
11,124.444,rs7932158,-0.005  
11,124.471,rs12278795,-0.005  
11,124.534,rs1945010,-0.003  
11,124.548,rs3133864,-0.005  
11,124.570,rs948028,-0.005  
11,124.586,rs879602,-0.002  
11,124.596,rs1954787,-0.003  
11,124.645,rs6589846,-0.002  
11,124.740,rs7111184,-0.001  
11,124.765,rs949295,0.000  
11,124.808,rs3781817,0.001  
11,124.829,rs2276319,0.001  
11,124.865,rs10892657,0.001  
11,124.931,rs7952619,0.002  
11,125.016,rs684384,0.001  
11,125.052,rs2155466,0.002  
11,125.164,rs10892689,0.001  
11,125.318,rs11218261,-0.000

11,125.347,rs891437,-0.000  
11,125.459,rs668053,-0.001  
11,125.502,rs7945931,-0.001  
11,125.579,rs666004,-0.004  
11,125.598,rs11601559,-0.003  
11,125.637,rs1790213,-0.002  
11,125.680,rs12287339,-0.001  
11,125.688,rs7101373,-0.001  
11,125.742,rs11606903,-0.000  
11,125.761,rs647905,-0.000  
11,125.895,rs7937934,0.000  
11,126.065,rs2370643,-0.000  
11,126.075,rs1219385,-0.001  
11,126.080,rs1219423,-0.001  
11,126.192,rs1231186,0.000  
11,126.200,rs1789742,0.000  
11,126.206,rs1791977,0.000  
11,126.220,rs7101566,0.000  
11,126.482,rs549798,-0.000  
11,126.504,rs10502254,-0.000  
11,126.630,rs687928,-0.007  
11,126.788,rs6589913,-0.012  
11,126.957,rs531743,-0.018  
11,126.996,rs577924,-0.019  
11,127.129,rs660546,-0.017  
11,127.168,rs7115833,-0.015  
11,127.222,rs12293128,-0.018  
11,127.325,rs10892831,-0.019  
11,127.458,rs12804305,-0.016  
11,127.484,rs1216554,-0.015  
11,127.656,rs7937803,-0.009  
11,127.864,rs4565904,-0.003  
11,127.890,rs7111139,-0.002  
11,127.911,rs7944144,-0.002  
11,128.167,rs12797830,-0.000  
11,128.214,rs7932902,-0.001  
11,128.271,rs871843,-0.000  
11,128.289,rs12276870,-0.000  
11,128.350,rs10790529,-0.002  
11,128.366,rs6589948,-0.001  
11,128.413,rs872414,-0.002  
11,128.526,rs11218856,-0.001  
11,128.595,rs1916040,-0.001  
11,128.612,rs3107606,-0.001  
11,128.646,rs4936757,-0.001  
11,128.732,rs3134402,-0.002  
11,129.243,rs3816621,-0.001  
11,129.667,rs922252,0.000  
11,130.070,rs7126295,0.004  
11,130.141,rs11219032,0.002  
11,130.150,rs9943547,0.003  
11,130.158,rs12281746,0.002  
11,130.165,rs10892974,0.000  
11,130.208,rs7929006,-0.001  
11,130.222,rs7130937,-0.000  
11,130.288,rs577432,-0.001  
11,130.328,rs12272976,-0.001  
11,130.430,rs7934887,-0.001  
11,130.449,rs12273127,-0.000  
11,130.502,rs10502268,0.000  
11,130.622,rs7126113,-0.000

11,130.738,rs17686304,-0.000  
11,130.769,rs17128086,-0.000  
11,130.809,rs10502277,-0.000  
11,130.882,rs12800859,-0.002  
11,130.947,rs489527,-0.003  
11,130.995,rs12802638,-0.002  
11,131.000,rs17128423,-0.002  
11,131.298,rs2512167,-0.016  
11,131.392,rs539802,-0.027  
11,131.467,rs10431091,-0.039  
11,131.528,rs7110338,-0.036  
11,131.537,rs10790707,-0.031  
11,131.546,rs10128573,-0.028  
11,131.554,rs10893277,-0.029  
11,131.567,rs686567,-0.031  
11,131.569,rs2846572,-0.032  
11,131.573,rs2187152,-0.032  
11,131.647,rs646487,-0.043  
11,131.727,rs646521,-0.069  
11,131.740,rs1783885,-0.065  
11,131.749,rs997989,-0.063  
11,131.754,rs610104,-0.059  
11,131.763,rs11219805,-0.113  
11,131.764,rs11219808,-0.121  
11,131.765,rs11604758,-0.135  
11,131.783,rs11219821,-0.113  
11,131.800,rs11219830,-0.107  
11,131.803,rs12421354,-0.107  
11,131.855,rs3809054,-0.111  
11,131.964,rs4477450,-0.119  
11,131.970,rs3802807,-0.121  
11,131.988,rs7128296,-0.127  
11,132.012,rs666051,-0.132  
11,132.025,rs734434,-0.116  
11,132.032,rs7108303,-0.114  
11,132.075,rs601414,-0.107  
11,132.116,rs12577901,-0.096  
11,132.159,rs750338,-0.088  
11,132.184,rs4935918,-0.084  
11,132.187,rs12360927,-0.083  
11,132.217,rs4937003,-0.077  
11,132.220,rs2059615,-0.078  
11,132.235,rs731716,-0.074  
11,132.237,rs7941528,-0.074  
11,132.250,rs959582,-0.067  
11,132.263,rs599206,-0.058  
11,132.597,rs2845853,-0.055  
11,133.148,rs635819,-0.060  
11,133.280,rs2509616,-0.058  
11,133.477,rs528638,-0.050  
11,133.535,rs3740912,-0.048  
11,133.695,rs2043438,-0.035  
11,133.797,rs4935955,-0.030  
11,133.953,rs2278451,-0.036  
11,134.212,rs632918,-0.106  
11,134.214,rs562731,-0.106  
11,134.250,rs515917,-0.112  
11,134.644,rs3802813,-0.088  
11,134.748,rs624259,-0.086  
11,135.090,rs11220473,-0.123  
11,135.117,rs2298475,-0.129

11,135.193,rs4935969,-0.146  
11,135.248,rs3740918,-0.160  
11,135.268,rs3802819,-0.165  
11,135.338,rs7946496,-0.181  
11,135.469,rs1892999,-0.185  
11,135.491,rs12803511,-0.193  
11,135.567,rs12270348,-0.235  
11,135.602,rs674537,-0.258  
11,135.673,rs12291500,-0.309  
11,135.720,rs10893539,-0.341  
11,135.771,rs619996,-0.408  
11,135.818,rs632023,-0.333  
11,135.861,rs541969,-0.302  
11,135.931,rs493725,-0.278  
11,135.940,rs693253,-0.277  
11,135.942,rs11220578,-0.278  
11,135.961,rs1946075,-0.313  
11,135.969,rs1946053,-0.315  
11,135.972,rs10750352,-0.315  
11,135.982,rs7924535,-0.301  
11,135.987,rs6590235,-0.288  
11,135.993,rs1939992,-0.273  
11,135.998,rs10893608,-0.262  
11,135.999,rs2040339,-0.262  
11,136.001,rs631562,-0.262  
11,136.006,rs11220708,-0.266  
11,136.009,rs483644,-0.277  
11,136.018,rs619208,-0.299  
11,136.028,rs6590245,-0.288  
11,136.031,rs12291238,-0.243  
11,136.038,rs2513444,-0.212  
11,136.044,rs4529888,-0.182  
11,136.049,rs7924365,-0.179  
11,136.058,rs10893663,-0.173  
11,136.060,rs2618202,-0.172  
11,136.079,rs7108023,-0.171  
11,136.086,rs11220916,-0.165  
11,136.091,rs7924331,-0.196  
11,136.111,rs7102636,-0.165  
11,136.116,rs7946281,-0.158  
11,136.124,rs356272,-0.145  
11,136.589,rs1940745,-0.143  
11,136.791,rs1785039,-0.129  
11,137.293,rs11221163,-0.122  
11,137.387,rs1477577,-0.119  
11,137.412,rs1940359,-0.119  
11,137.990,rs7110677,-0.141  
11,137.991,rs7127307,-0.141  
11,138.042,rs6590322,-0.131  
11,138.060,rs871506,-0.126  
11,138.157,rs4556551,-0.131  
11,138.204,rs7939722,-0.128  
11,138.245,rs1540225,-0.129  
11,138.379,rs4937333,-0.127  
11,138.434,rs7122859,-0.121  
11,138.450,rs4628683,-0.119  
11,138.537,rs7116578,-0.104  
11,138.563,rs4937342,-0.102  
11,138.624,rs4245079,-0.096  
11,138.750,rs4937357,-0.101  
11,138.771,rs11221388,-0.103

11,138.819,rs4937362,-0.107  
11,138.843,rs7935286,-0.107  
11,138.902,rs7939387,-0.108  
11,138.919,rs10790969,-0.107  
11,139.007,rs695113,-0.085  
11,139.163,rs626816,-0.128  
11,139.188,rs4558174,-0.145  
11,139.216,rs687572,-0.166  
11,139.230,rs603021,-0.180  
11,139.307,rs687326,-0.177  
11,139.342,rs554341,-0.176  
11,139.371,rs9667584,-0.175  
11,139.447,rs7925428,-0.162  
11,139.508,rs7943324,-0.151  
11,139.517,rs1574128,-0.149  
11,139.539,rs6590356,-0.150  
11,139.645,rs1893142,-0.176  
11,139.667,rs11601431,-0.171  
11,139.703,rs4609618,-0.167  
11,139.758,rs3740829,-0.167  
11,140.504,rs4245084,-0.186  
11,140.583,rs4616048,-0.187  
11,140.713,rs10894022,-0.184  
11,140.876,rs1540666,-0.182  
11,140.909,rs10791006,-0.165  
11,140.946,rs11221703,-0.144  
11,140.947,rs3019797,-0.143  
11,140.985,rs2860290,-0.142  
11,141.008,rs11828252,-0.140  
11,141.062,rs3019117,-0.133  
11,141.254,rs1389235,-0.117  
11,141.276,rs2008849,-0.119  
11,141.321,rs923811,-0.146  
11,141.399,rs1552820,-0.139  
11,141.405,rs11823376,-0.139  
11,141.494,rs1873873,-0.135  
11,141.550,rs6590400,-0.157  
11,141.728,rs1814343,-0.169  
11,141.737,rs10894117,-0.169  
11,141.815,rs692611,-0.162  
11,141.858,rs525320,-0.149  
11,141.871,rs934130,-0.149  
11,141.978,rs10894138,-0.141  
11,142.158,rs7114881,-0.106  
11,142.306,rs1623543,-0.119  
11,142.499,rs7111882,-0.143  
11,142.724,rs982125,-0.180  
11,142.975,rs11221986,-0.187  
11,143.096,rs10791062,-0.190  
11,143.163,rs4936094,-0.197  
11,143.341,rs858718,-0.195  
11,143.500,rs7938225,-0.193  
11,143.517,rs7937282,-0.193  
11,143.560,rs6590453,-0.194  
11,143.654,rs2242312,-0.206  
11,143.685,rs2291347,-0.213  
11,143.745,rs10894199,-0.230  
11,143.763,rs11222101,-0.239  
11,143.849,rs4937523,-0.284  
11,143.872,rs1493300,-0.285  
11,144.059,rs11222164,-0.288

11,144.064,rs2640215,-0.289  
11,144.118,rs12418439,-0.305  
11,144.252,rs2091735,-0.342  
11,144.269,rs7118354,-0.346  
11,144.281,rs7105145,-0.349  
11,144.380,rs7933829,-0.332  
11,144.458,rs4466848,-0.321  
11,144.632,rs10894241,-0.291  
11,144.680,rs6590509,-0.290  
11,144.785,rs1939904,-0.304  
11,144.793,rs10894262,-0.305  
11,144.803,rs10894263,-0.295  
11,144.830,rs7943936,-0.271  
11,144.918,rs12364918,-0.299  
11,144.966,rs585512,-0.337  
11,145.013,rs4414223,-0.329  
11,145.031,rs11822781,-0.327  
11,145.324,rs1118137,-0.306  
11,145.373,rs1347281,-0.294  
11,145.543,rs2276437,-0.339  
11,145.627,rs10750464,-0.370  
11,145.639,rs11222488,-0.383  
11,145.670,rs11222492,-0.358  
11,145.678,rs10894332,-0.352  
11,145.698,rs10750465,-0.337  
11,145.702,rs1613845,-0.335  
11,145.821,rs4254083,-0.269  
11,145.829,rs1793562,-0.253  
11,145.920,rs1793544,-0.236  
11,145.949,rs7937772,-0.239  
11,146.076,rs7939158,-0.253  
11,146.174,rs2513536,-0.269  
11,146.205,rs11606643,-0.262  
11,146.234,rs4128590,-0.267  
11,146.301,rs7943929,-0.306  
11,146.373,rs895797,-0.317  
11,146.423,rs10894387,-0.325  
11,146.502,rs12790085,-0.375  
11,146.566,rs1550976,-0.430  
11,146.590,rs11222633,-0.447  
11,146.680,rs10791148,-0.511  
11,146.702,rs874548,-0.515  
11,146.793,rs385987,-0.544  
11,146.899,rs318984,-0.555  
11,146.905,rs11828333,-0.558  
11,147.063,rs1040101,-0.601  
11,147.246,rs4547102,-0.654  
11,147.314,rs2246649,-0.662  
11,147.824,rs11821922,-0.733  
11,147.859,rs1527776,-0.774  
11,147.872,rs1554802,-0.788  
11,148.026,rs1036433,-0.848  
11,148.046,rs659910,-0.833  
11,148.050,rs541507,-0.832  
11,148.110,rs496368,-0.786  
11,148.114,rs10791184,-0.781  
11,148.115,rs511311,-0.782  
11,148.121,rs552542,-0.785  
11,148.173,rs10791187,-0.802  
11,148.198,rs916579,-0.823  
11,148.314,rs1547893,-0.908

11,148.334,rs10894495,-0.923  
11,148.427,rs4128547,-0.950  
11,148.569,rs11222981,-0.945  
11,148.582,rs3099789,-0.945  
11,148.754,rs2044728,-0.949  
11,148.810,rs12293070,-0.939  
11,148.862,rs3099773,-0.938  
11,148.894,rs895924,-0.933  
11,149.527,rs877264,-0.820  
11,149.555,rs621452,-0.821  
11,149.585,rs2508983,-0.823  
11,149.708,rs490435,-0.825  
11,149.709,rs494050,-0.825  
11,149.773,rs7125475,-0.812  
11,150.135,rs10894589,-0.807  
11,150.141,rs11223157,-0.807  
11,150.474,rs1620329,-0.701  
11,150.505,rs532769,-0.758  
11,150.853,rs11223213,-0.628  
11,150.981,rs4937729,-0.592  
11,151.035,rs1506876,-0.591  
11,151.042,rs2659615,-0.604  
11,151.066,rs1395504,-0.648  
11,151.114,rs10791261,-0.682  
11,151.155,rs12222239,-0.709  
11,151.210,rs979054,-0.803  
11,151.218,rs2725442,-0.809  
11,151.230,rs7342163,-0.818  
11,151.245,rs7123307,-0.819  
11,151.264,rs871437,-0.837  
11,151.318,rs4542422,-0.874  
11,151.333,rs1567127,-0.826  
11,151.338,rs11223299,-0.828  
11,151.370,rs12287409,-0.837  
11,151.386,rs7101624,-0.840  
11,151.445,rs7935421,-0.873  
11,151.499,rs11223331,-0.874  
11,151.548,rs11223336,-0.872  
11,151.584,rs12365003,-0.870  
11,151.611,rs11223350,-0.909  
11,151.650,rs1007018,-0.921  
11,151.684,rs7122481,-0.996  
11,151.738,rs985631,-0.992  
11,151.765,rs7123002,-0.940  
11,151.795,rs101259,-0.929  
11,151.882,rs728341,-0.820  
11,151.911,rs1563155,-0.883  
11,151.937,rs11223384,-0.897  
11,151.950,rs7121368,-0.920  
11,152.005,rs10894662,-0.923  
11,152.013,rs750270,-0.910  
11,152.031,rs11223403,-0.902  
11,152.050,rs12365021,-0.916  
11,152.270,rs7926233,-1.044  
11,152.286,rs11602409,-1.032  
11,152.297,rs7945328,-1.019  
11,152.370,rs12804771,-0.948  
11,152.405,rs7939409,-0.927  
11,152.485,rs10791306,-1.151  
11,152.488,rs4936203,-1.155  
11,152.501,rs7927483,-1.207

11,152.508,rs903818,-1.183  
11,152.523,rs12279437,-1.080  
11,152.566,rs7102004,-1.086  
11,152.634,rs2723603,-1.094  
11,152.679,rs2723616,-1.095  
11,152.812,rs510306,-1.034  
11,152.889,rs329640,-1.100  
11,152.895,rs694424,-1.102  
11,152.901,rs3802924,-1.101  
11,152.935,rs1038480,-1.092  
11,152.947,rs329686,-1.066  
11,152.955,rs12364540,-1.048  
11,153.006,rs4937864,-1.024  
11,153.017,rs682386,-1.018  
11,153.023,rs585939,-1.015  
11,153.061,rs2017948,-0.997  
11,153.335,rs1551184,-0.865  
11,153.340,rs1031381,-0.862  
11,153.419,rs7112898,-0.825  
11,153.441,rs1669258,-0.814  
11,153.508,rs481252,-0.814  
11,153.542,rs10894799,-0.780  
11,153.557,rs10750560,-0.770  
11,153.568,rs7935733,-0.762  
11,153.571,rs3802928,-0.762  
11,153.614,rs729687,-0.779  
11,153.653,rs1866768,-0.777  
11,153.689,rs893949,-0.781  
11,153.716,rs7935790,-0.772  
11,153.746,rs11223842,-0.756  
11,153.773,rs7130091,-0.780  
11,153.779,rs10894831,-0.785  
11,153.855,rs7936730,-0.828  
11,153.870,rs3924413,-0.736  
11,153.878,rs6590745,-0.701  
11,153.885,rs7934698,-0.683  
11,153.914,rs7113440,-0.589  
11,153.917,rs4936241,-0.581  
11,153.940,rs11223911,-0.550  
11,154.114,rs11223936,-0.587  
11,154.127,rs3737494,-0.593  
11,154.160,rs1939726,-0.605  
11,154.171,rs11607363,-0.613  
11,154.219,rs10894861,-0.692  
11,154.221,rs7931468,-0.694  
11,154.229,rs4937951,-0.676  
11,154.231,rs11223991,-0.677  
11,154.271,rs1289459,-0.706  
11,154.320,rs931932,-0.716  
11,154.338,rs7106361,-0.725  
11,154.394,rs1892987,-0.581  
11,154.426,rs7125596,-0.549  
11,154.432,rs906628,-0.537  
11,154.434,rs7932186,-0.537  
11,154.470,rs7939829,-0.543  
11,154.477,rs4936257,-0.536  
11,154.514,rs2127077,-0.538  
11,154.563,rs6590781,-0.552  
11,154.653,rs1871265,-0.519  
11,154.706,rs10894947,-0.498  
12,0.116,rs10744648,0.108



12,0.188,rs10849108,0.089  
12,0.268,rs10774269,0.085  
12,0.283,rs2286783,0.084  
12,0.299,rs873134,0.070  
12,0.347,rs12582126,0.071  
12,0.367,rs12811910,0.072  
12,0.411,rs756502,0.096  
12,0.444,rs758791,0.117  
12,0.453,rs1860613,0.125  
12,0.456,rs9861,0.127  
12,0.462,rs1468624,0.128  
12,0.477,rs740895,0.131  
12,0.599,rs11063806,0.125  
12,0.624,rs722097,0.122  
12,0.868,rs7298096,0.094  
12,0.946,rs2887474,0.090  
12,1.123,rs7300332,0.076  
12,1.176,rs7137188,0.072  
12,1.421,rs10849559,0.047  
12,1.655,rs7305099,0.036  
12,1.657,rs12309274,0.036  
12,1.683,rs10849573,0.031  
12,1.745,rs3924361,0.025  
12,3.299,rs7973613,0.032  
12,3.391,rs16928468,0.033  
12,3.523,rs3741976,0.031  
12,3.564,rs7296006,0.029  
12,3.796,rs4765827,0.030  
12,3.801,rs2369856,0.030  
12,3.852,rs10773958,0.023  
12,3.969,rs11061847,0.021  
12,4.052,rs10491958,0.021  
12,4.088,rs11061856,0.023  
12,4.089,rs16928563,0.023  
12,4.124,rs7969171,0.038  
12,4.195,rs4765829,0.066  
12,4.264,rs4766403,0.083  
12,4.271,rs4766408,0.083  
12,4.448,rs2108642,0.068  
12,4.560,rs11608292,0.098  
12,4.571,rs10437823,0.088  
12,4.573,rs12827147,0.108  
12,4.626,rs10848582,0.079  
12,4.694,rs12307334,0.098  
12,4.757,rs2429175,0.105  
12,4.758,rs9669556,0.105  
12,4.760,rs10505725,0.105  
12,4.790,rs7302743,0.065  
12,4.821,rs2239016,0.050  
12,4.924,rs2238056,0.026  
12,4.937,rs11062164,0.026  
12,5.135,rs10848645,0.021  
12,5.195,rs10848648,0.019  
12,5.240,rs2238077,0.018  
12,5.317,rs2887780,0.024  
12,5.324,rs2239062,0.025  
12,5.394,rs994901,0.020  
12,5.417,rs10774043,0.019  
12,5.455,rs4765687,0.024  
12,5.461,rs10774048,0.016  
12,5.524,rs2239089,0.016

12,5.561,rs16929486,0.011  
12,5.568,rs10848665,0.011  
12,5.571,rs2283318,0.017  
12,5.628,rs12231350,0.015  
12,5.862,rs2238091,0.009  
12,6.157,rs12229387,0.010  
12,6.303,rs4075718,0.005  
12,6.308,rs4409904,0.005  
12,6.445,rs3814249,0.018  
12,6.470,rs11062373,0.020  
12,6.484,rs4766000,0.020  
12,6.585,rs1860434,0.028  
12,6.818,rs7138776,0.044  
12,6.889,rs1894791,0.061  
12,6.971,rs3782836,0.054  
12,7.078,rs10848775,0.055  
12,7.231,rs12820322,0.056  
12,7.466,rs7315917,0.049  
12,7.471,rs7973427,0.049  
12,7.568,rs10848816,0.048  
12,7.660,rs4765717,0.037  
12,7.808,rs10848823,0.029  
12,7.815,rs3741947,0.030  
12,7.835,rs4766076,0.034  
12,7.921,rs3782803,0.037  
12,7.957,rs645722,0.038  
12,8.238,rs727864,0.049  
12,8.278,rs10848844,0.051  
12,8.371,rs7134795,0.040  
12,8.467,rs4238009,0.033  
12,8.632,rs2878578,0.031  
12,8.766,rs6489469,0.036  
12,8.826,rs7305595,0.037  
12,8.885,rs10848865,0.037  
12,9.275,rs7972248,0.054  
12,9.289,rs758612,0.054  
12,9.479,rs876594,0.058  
12,9.576,rs3741936,0.100  
12,9.593,rs11062725,0.106  
12,9.714,rs1029766,0.108  
12,9.761,rs7978951,0.113  
12,9.775,rs12368682,0.115  
12,9.827,rs4766144,0.120  
12,9.839,rs4766146,0.122  
12,9.975,rs4766152,0.144  
12,10.441,rs241981,0.158  
12,10.478,rs241966,0.185  
12,10.480,rs2013195,0.185  
12,10.559,rs11062784,0.189  
12,10.585,rs11062786,0.188  
12,10.632,rs9300302,0.179  
12,10.707,rs10128816,0.140  
12,10.742,rs2109556,0.139  
12,11.338,rs6489501,0.107  
12,11.417,rs1419859,0.085  
12,11.428,rs12581853,0.085  
12,11.472,rs2058218,0.082  
12,11.577,rs638977,0.077  
12,11.643,rs688410,0.077  
12,11.714,rs2578467,0.079  
12,11.775,rs609018,0.051

12,11.789,rs658719,0.047  
12,11.797,rs631750,0.045  
12,11.837,rs4491324,0.043  
12,11.905,rs10848967,0.052  
12,12.035,rs4238010,0.099  
12,12.279,rs2532560,0.139  
12,12.350,rs2540142,0.147  
12,13.069,rs1861178,0.149  
12,13.079,rs2041731,0.150  
12,13.133,rs7300031,0.149  
12,13.169,rs10849024,0.140  
12,13.178,rs4411338,0.139  
12,13.215,rs4766227,0.182  
12,13.271,rs3217863,0.190  
12,13.280,rs3217901,0.190  
12,13.297,rs10505729,0.212  
12,13.299,rs7133323,0.212  
12,13.338,rs10849040,0.160  
12,13.371,rs7962818,0.158  
12,13.430,rs12820100,0.151  
12,13.436,rs7135778,0.153  
12,13.486,rs7306482,0.171  
12,13.513,rs2970828,0.178  
12,13.698,rs740059,0.169  
12,13.707,rs10444471,0.168  
12,13.712,rs12306837,0.168  
12,13.730,rs4766258,0.168  
12,13.742,rs2302251,0.168  
12,13.797,rs7136668,0.167  
12,13.931,rs4766276,0.166  
12,14.121,rs17783679,0.175  
12,14.191,rs9788072,0.186  
12,14.278,rs12423234,0.189  
12,14.297,rs7953164,0.191  
12,14.361,rs2041381,0.183  
12,14.454,rs2041379,0.159  
12,14.465,rs2041377,0.157  
12,14.488,rs10492061,0.165  
12,14.509,rs6489582,0.172  
12,14.620,rs10492062,0.180  
12,14.650,rs2058287,0.183  
12,14.765,rs996802,0.199  
12,14.787,rs10492070,0.202  
12,14.824,rs12831433,0.207  
12,14.828,rs11832578,0.207  
12,14.861,rs2109185,0.215  
12,14.866,rs7297784,0.215  
12,14.883,rs3759356,0.214  
12,14.910,rs4766333,0.212  
12,14.974,rs4765803,0.228  
12,14.984,rs17179072,0.232  
12,15.027,rs611652,0.275  
12,15.058,rs1564372,0.282  
12,15.099,rs534665,0.290  
12,15.112,rs630325,0.264  
12,15.129,rs7302032,0.256  
12,15.146,rs7308861,0.239  
12,15.155,rs10849223,0.231  
12,15.163,rs7298856,0.226  
12,15.179,rs7968928,0.226  
12,15.234,rs7959202,0.218

12,15.484,rs10849264,0.185  
12,15.554,rs10744682,0.181  
12,15.572,rs10492095,0.182  
12,15.698,rs10849277,0.210  
12,15.740,rs11063723,0.221  
12,15.765,rs4073042,0.219  
12,15.773,rs17181102,0.209  
12,15.784,rs4930758,0.195  
12,15.796,rs2193160,0.182  
12,15.800,rs11614804,0.180  
12,15.899,rs10849297,0.152  
12,15.906,rs3759225,0.152  
12,15.976,rs1558776,0.151  
12,16.078,rs11609654,0.139  
12,16.082,rs11063791,0.138  
12,16.083,rs10492181,0.164  
12,16.272,rs9669580,0.151  
12,16.317,rs17785727,0.152  
12,16.339,rs3782637,0.149  
12,16.525,rs216298,0.127  
12,16.570,rs4764482,0.127  
12,16.616,rs3782711,0.103  
12,16.726,rs7306706,0.067  
12,17.018,rs2363880,0.042  
12,17.022,rs797770,0.042  
12,17.148,rs2268009,0.036  
12,17.222,rs10849426,0.046  
12,17.289,rs7304348,0.060  
12,17.423,rs740842,0.047  
12,17.511,rs4149577,0.056  
12,17.581,rs6489711,0.053  
12,17.662,rs3759333,0.036  
12,17.696,rs2364482,0.033  
12,17.773,rs10849451,0.031  
12,17.868,rs2250246,0.036  
12,17.871,rs3136551,0.037  
12,17.874,rs25680,0.037  
12,17.933,rs12964,0.054  
12,18.133,rs917634,0.039  
12,18.404,rs1639122,0.035  
12,18.526,rs1045553,0.041  
12,18.805,rs10774442,0.050  
12,18.912,rs2302367,0.049  
12,18.979,rs2301333,0.057  
12,18.993,rs3782735,0.074  
12,19.050,rs2707210,0.051  
12,19.098,rs11064404,0.042  
12,19.110,rs11064410,0.040  
12,19.160,rs874627,0.033  
12,19.164,rs2071081,0.032  
12,19.206,rs4963517,0.033  
12,19.496,rs2239167,0.048  
12,19.540,rs1044189,0.053  
12,19.655,rs1984564,0.053  
12,19.888,rs7311672,0.056  
12,20.127,rs3813729,0.066  
12,20.147,rs12820834,0.065  
12,20.270,rs7302230,0.066  
12,20.301,rs4883422,0.066  
12,20.435,rs2290241,0.062  
12,20.506,rs4329748,0.061

12,20.527,rs17789193,0.061  
12,20.903,rs10844153,0.054  
12,21.194,rs10845159,0.045  
12,21.777,rs12296276,0.038  
12,21.842,rs2377084,0.038  
12,22.011,rs10845708,0.055  
12,22.052,rs10772650,0.060  
12,22.086,rs11609608,0.059  
12,22.096,rs11055443,0.059  
12,22.208,rs12310416,0.041  
12,22.273,rs7976721,0.034  
12,22.311,rs11833259,0.031  
12,22.321,rs7959924,0.030  
12,22.333,rs7300262,0.029  
12,22.458,rs2889545,0.032  
12,22.482,rs16916683,0.031  
12,22.504,rs12369506,0.026  
12,22.547,rs10846078,0.022  
12,22.642,rs6488767,0.026  
12,22.753,rs4310684,0.055  
12,22.755,rs10734891,0.055  
12,22.838,rs11057065,0.064  
12,22.866,rs2377419,0.068  
12,22.933,rs17728930,0.080  
12,22.942,rs17728942,0.081  
12,22.971,rs4294628,0.080  
12,22.977,rs7310448,0.080  
12,23.430,rs7978532,0.022  
12,23.484,rs10770855,0.019  
12,23.515,rs4388945,0.023  
12,23.553,rs2028373,0.020  
12,23.555,rs3794318,0.020  
12,23.555,rs2580874,0.020  
12,23.651,rs7132012,0.038  
12,23.728,rs2969097,0.036  
12,23.829,rs10161484,0.040  
12,23.863,rs1344454,0.056  
12,23.886,rs2377609,0.054  
12,23.896,rs16917857,0.055  
12,23.896,rs1476910,0.055  
12,23.913,rs4883195,0.053  
12,23.950,rs12821842,0.051  
12,23.996,rs4882978,0.069  
12,24.018,rs3213831,0.078  
12,24.024,rs3741849,0.080  
12,24.044,rs717178,0.089  
12,24.083,rs741623,0.111  
12,24.085,rs10492109,0.111  
12,24.190,rs2058429,0.144  
12,24.209,rs1863871,0.154  
12,24.266,rs11053043,0.197  
12,24.271,rs917915,0.199  
12,24.302,rs1597097,0.231  
12,24.303,rs7313141,0.231  
12,24.355,rs4764107,0.274  
12,24.559,rs10772223,0.242  
12,24.636,rs2200745,0.231  
12,24.849,rs6488255,0.152  
12,24.861,rs7314021,0.144  
12,24.893,rs10505755,0.130  
12,24.931,rs10845073,0.112

12,25.015,rs10772257,0.070  
12,25.018,rs2537760,0.066  
12,25.037,rs10734827,0.045  
12,25.057,rs11053781,0.037  
12,25.205,rs2607900,0.012  
12,25.212,rs4763206,0.013  
12,25.218,rs9988929,0.012  
12,25.283,rs10845203,0.008  
12,25.311,rs753202,0.008  
12,25.317,rs17809949,0.008  
12,25.317,rs797178,0.008  
12,25.328,rs7316817,0.008  
12,25.438,rs1015443,0.005  
12,25.520,rs10772420,0.007  
12,25.728,rs1863842,0.013  
12,25.760,rs2059764,0.008  
12,26.098,rs7960118,0.001  
12,26.225,rs2416791,0.000  
12,26.313,rs11054372,-0.000  
12,26.646,rs205534,-0.001  
12,26.712,rs2856320,-0.001  
12,27.145,rs3802993,-0.000  
12,27.167,rs11054454,-0.000  
12,27.226,rs2856328,-0.000  
12,27.233,rs2856329,-0.000  
12,27.233,rs2856330,-0.000  
12,27.242,rs762718,-0.000  
12,27.388,rs2710293,0.002  
12,27.436,rs2515767,0.003  
12,27.461,rs11836917,0.004  
12,27.509,rs10505762,0.006  
12,27.526,rs2238122,0.007  
12,27.555,rs2855711,0.004  
12,27.581,rs2954930,0.002  
12,27.617,rs2954932,0.000  
12,27.632,rs6488467,-0.000  
12,27.643,rs7300814,-0.001  
12,27.657,rs4763263,-0.002  
12,27.676,rs7962986,-0.003  
12,27.759,rs10845459,-0.001  
12,27.771,rs1544669,-0.007  
12,27.780,rs2430605,-0.006  
12,27.792,rs16907705,-0.004  
12,27.798,rs2160523,-0.004  
12,27.805,rs2448050,-0.003  
12,27.810,rs4763780,-0.003  
12,27.899,rs11054721,-0.000  
12,28.223,rs7976685,-0.007  
12,28.381,rs3741800,-0.008  
12,28.399,rs7968375,-0.008  
12,28.751,rs11834080,-0.010  
12,28.896,rs10845568,-0.022  
12,28.922,rs7309730,-0.025  
12,29.144,rs1014448,-0.037  
12,29.202,rs873218,-0.041  
12,29.213,rs10743992,-0.041  
12,29.355,rs10492239,-0.041  
12,29.361,rs11055008,-0.042  
12,29.521,rs34330,-0.051  
12,29.617,rs4763870,-0.044  
12,29.642,rs16908404,-0.041

12,29.709,rs7956578,-0.047  
12,29.741,rs7301803,-0.047  
12,29.903,rs7314463,-0.056  
12,29.976,rs7961672,-0.060  
12,29.978,rs2417235,-0.060  
12,30.069,rs11055126,-0.081  
12,30.078,rs3863345,-0.083  
12,30.091,rs4763305,-0.082  
12,30.154,rs2160667,-0.055  
12,30.172,rs3782572,-0.049  
12,30.414,rs929683,-0.069  
12,30.817,rs3825271,-0.074  
12,30.870,rs3736209,-0.075  
12,30.918,rs17820032,-0.069  
12,30.984,rs10772624,-0.055  
12,31.021,rs10845715,-0.039  
12,31.031,rs3812820,-0.038  
12,31.055,rs7979618,-0.036  
12,31.077,rs2061868,-0.033  
12,31.140,rs7314446,-0.040  
12,31.142,rs11837280,-0.040  
12,31.147,rs1382679,-0.053  
12,31.190,rs1805510,-0.052  
12,31.230,rs2160519,-0.051  
12,31.269,rs2268102,-0.050  
12,31.292,rs7972662,-0.048  
12,31.318,rs2284411,-0.044  
12,31.322,rs11610518,-0.045  
12,31.418,rs2300272,-0.062  
12,31.423,rs2160730,-0.063  
12,31.497,rs10845852,-0.072  
12,31.580,rs219922,-0.063  
12,31.606,rs10505778,-0.045  
12,31.607,rs1421106,-0.045  
12,31.613,rs1421108,-0.044  
12,31.688,rs1861872,-0.043  
12,31.732,rs10505780,-0.044  
12,31.788,rs11055747,-0.043  
12,31.871,rs10845886,-0.049  
12,31.954,rs12809105,-0.052  
12,32.128,rs6488666,-0.073  
12,32.148,rs17834211,-0.074  
12,32.170,rs12425125,-0.090  
12,32.187,rs11055891,-0.102  
12,32.218,rs10083074,-0.111  
12,32.576,rs4576875,-0.129  
12,32.577,rs7298685,-0.129  
12,32.687,rs3827886,-0.128  
12,32.784,rs2302888,-0.126  
12,32.914,rs2287538,-0.134  
12,32.967,rs1362599,-0.152  
12,32.984,rs6488713,-0.165  
12,33.023,rs4236,-0.163  
12,33.063,rs11056267,-0.175  
12,33.082,rs2445402,-0.193  
12,33.112,rs7308621,-0.254  
12,33.137,rs7131767,-0.348  
12,33.138,rs10846153,-0.352  
12,33.144,rs7956773,-0.356  
12,33.193,rs1117152,-0.375  
12,33.291,rs1461039,-0.327

12,33.387,rs11611715,-0.338  
12,33.420,rs12230341,-0.337  
12,33.471,rs3748299,-0.348  
12,33.566,rs6488792,-0.370  
12,33.571,rs11612558,-0.371  
12,33.662,rs10772874,-0.349  
12,33.922,rs3782545,-0.310  
12,33.937,rs1450981,-0.308  
12,33.953,rs7980712,-0.307  
12,33.958,rs7971685,-0.306  
12,33.995,rs11056760,-0.309  
12,34.130,rs1450974,-0.350  
12,34.229,rs1358251,-0.385  
12,34.246,rs1799455,-0.388  
12,34.318,rs10505797,-0.403  
12,34.498,rs1671476,-0.455  
12,34.534,rs3847924,-0.465  
12,34.669,rs10744116,-0.463  
12,34.895,rs6488844,-0.395  
12,35.050,rs726206,-0.412  
12,35.127,rs12425910,-0.427  
12,35.190,rs7135281,-0.426  
12,35.211,rs11057006,-0.405  
12,35.246,rs11057009,-0.376  
12,35.247,rs16912067,-0.376  
12,35.261,rs10846387,-0.390  
12,35.312,rs366281,-0.450  
12,35.320,rs7963143,-0.470  
12,35.342,rs1163959,-0.453  
12,35.394,rs10840729,-0.463  
12,35.414,rs1912879,-0.468  
12,35.497,rs2437983,-0.488  
12,35.511,rs729953,-0.486  
12,35.684,rs10840919,-0.462  
12,35.745,rs10129026,-0.457  
12,35.843,rs7139425,-0.478  
12,35.866,rs4614516,-0.487  
12,35.868,rs7952873,-0.489  
12,35.934,rs11044004,-0.516  
12,35.996,rs12297325,-0.526  
12,36.073,rs1374670,-0.566  
12,36.160,rs1816971,-0.614  
12,36.179,rs4763508,-0.597  
12,36.191,rs982754,-0.592  
12,36.216,rs11833512,-0.600  
12,36.285,rs10841096,-0.630  
12,36.319,rs10841098,-0.616  
12,36.384,rs10841121,-0.588  
12,36.385,rs16914912,-0.588  
12,37.040,rs10841245,-0.595  
12,37.218,rs7312615,-0.578  
12,37.291,rs10841289,-0.599  
12,37.338,rs10841298,-0.593  
12,37.352,rs6486999,-0.591  
12,37.455,rs10841322,-0.574  
12,37.468,rs7960116,-0.573  
12,37.472,rs4441088,-0.573  
12,37.508,rs10841335,-0.567  
12,37.609,rs2731629,-0.586  
12,37.635,rs2259656,-0.585  
12,37.672,rs2731612,-0.587



12,37.714,rs1565592,-0.618  
12,37.761,rs941223,-0.652  
12,37.847,rs10841399,-0.624  
12,37.858,rs7970229,-0.621  
12,37.872,rs2694992,-0.614  
12,37.995,rs10437774,-0.545  
12,38.102,rs11045000,-0.591  
12,38.324,rs7302242,-0.718  
12,38.350,rs12812722,-0.729  
12,38.364,rs7964046,-0.733  
12,38.462,rs1427988,-0.748  
12,38.469,rs10505867,-0.744  
12,38.505,rs1991458,-0.716  
12,38.523,rs1863961,-0.722  
12,38.605,rs2417848,-0.756  
12,39.033,rs10841495,-0.830  
12,39.043,rs10841496,-0.877  
12,39.050,rs10841497,-1.071  
12,39.140,rs17324684,-1.097  
12,39.180,rs4762956,-1.107  
12,39.190,rs10770660,-1.098  
12,39.195,rs7304649,-1.141  
12,39.231,rs4325354,-0.991  
12,39.232,rs4502032,-0.986  
12,39.244,rs7300210,-0.938  
12,39.268,rs4378443,-0.805  
12,39.271,rs7300068,-0.793  
12,39.292,rs11045392,-0.767  
12,39.302,rs12368457,-0.728  
12,39.309,rs11045417,-0.695  
12,39.318,rs12371796,-0.715  
12,39.505,rs4149064,-0.562  
12,39.514,rs987839,-0.555  
12,39.535,rs7980842,-0.545  
12,39.552,rs16923663,-0.536  
12,40.028,rs4762699,-0.377  
12,40.264,rs7137767,-0.376  
12,40.335,rs5486,-0.373  
12,40.725,rs2417978,-0.367  
12,41.248,rs3782660,-0.365  
12,41.438,rs17684048,-0.362  
12,41.461,rs759088,-0.361  
12,41.542,rs16924082,-0.332  
12,41.609,rs860447,-0.334  
12,41.730,rs11046207,-0.354  
12,41.735,rs1283822,-0.354  
12,41.826,rs10743428,-0.359  
12,41.882,rs10841923,-0.337  
12,41.899,rs11046265,-0.302  
12,41.945,rs7968922,-0.312  
12,41.948,rs10770887,-0.313  
12,42.005,rs918130,-0.296  
12,42.150,rs2728827,-0.275  
12,42.495,rs261926,-0.299  
12,42.497,rs261940,-0.301  
12,42.506,rs10505887,-0.335  
12,42.517,rs6416228,-0.353  
12,42.532,rs10842063,-0.372  
12,42.558,rs260879,-0.447  
12,42.567,rs10842067,-0.478  
12,42.574,rs2418082,-0.508

12,42.584,rs10842074,-0.527  
12,42.596,rs17175003,-0.550  
12,42.597,rs12581592,-0.551  
12,42.614,rs2466886,-0.536  
12,42.623,rs978816,-0.518  
12,42.676,rs2453872,-0.510  
12,42.731,rs3847890,-0.537  
12,42.744,rs12226934,-0.537  
12,42.749,rs3847896,-0.543  
12,42.760,rs3847899,-0.560  
12,42.771,rs3913139,-0.578  
12,42.774,rs11046751,-0.577  
12,42.778,rs3913141,-0.574  
12,42.788,rs16925680,-0.572  
12,42.915,rs763853,-0.532  
12,42.927,rs1379474,-0.531  
12,43.311,rs7298590,-0.438  
12,43.377,rs744348,-0.437  
12,43.438,rs7963980,-0.434  
12,43.472,rs7972005,-0.435  
12,43.481,rs2127310,-0.430  
12,43.498,rs10771005,-0.422  
12,43.532,rs10771009,-0.403  
12,43.566,rs10842199,-0.407  
12,43.625,rs11047047,-0.422  
12,43.631,rs12580229,-0.424  
12,43.648,rs725124,-0.431  
12,43.708,rs10842220,-0.446  
12,43.722,rs17474391,-0.450  
12,43.811,rs7305773,-0.474  
12,43.827,rs9804988,-0.478  
12,43.831,rs12820848,-0.481  
12,44.250,rs12581992,-0.520  
12,44.326,rs10505924,-0.516  
12,44.337,rs989657,-0.516  
12,44.419,rs11047225,-0.511  
12,44.605,rs11047263,-0.481  
12,44.638,rs2030130,-0.492  
12,44.690,rs16927236,-0.475  
12,44.691,rs12708363,-0.516  
12,44.692,rs11047279,-0.516  
12,44.699,rs10743492,-0.519  
12,44.748,rs4131755,-0.516  
12,44.922,rs1357251,-0.519  
12,44.933,rs2728843,-0.518  
12,45.059,rs10842304,-0.552  
12,45.121,rs10505939,-0.503  
12,45.147,rs577958,-0.502  
12,45.219,rs2055731,-0.501  
12,45.265,rs939856,-0.524  
12,45.303,rs550338,-0.529  
12,45.309,rs521144,-0.530  
12,45.353,rs12827160,-0.542  
12,45.383,rs1553671,-0.550  
12,45.400,rs1396204,-0.505  
12,45.400,rs1396205,-0.504  
12,45.439,rs11047426,-0.503  
12,45.509,rs4465447,-0.459  
12,45.624,rs1487657,-0.467  
12,45.722,rs10842390,-0.475  
12,45.727,rs11047560,-0.476

12,45.758,rs11047576,-0.480  
12,45.773,rs4963783,-0.481  
12,45.790,rs964447,-0.479  
12,45.845,rs7485690,-0.453  
12,45.883,rs11047652,-0.429  
12,45.916,rs6487429,-0.434  
12,46.072,rs924191,-0.473  
12,46.082,rs7305924,-0.477  
12,46.209,rs3782185,-0.519  
12,46.220,rs12426622,-0.523  
12,46.273,rs699031,-0.541  
12,46.305,rs699039,-0.535  
12,46.370,rs859198,-0.540  
12,46.396,rs962656,-0.545  
12,46.480,rs859153,-0.566  
12,46.787,rs12579073,-0.533  
12,46.862,rs12320328,-0.543  
12,46.866,rs6487465,-0.543  
12,46.917,rs7303282,-0.545  
12,47.062,rs4130755,-0.545  
12,47.132,rs7964381,-0.563  
12,47.154,rs9300166,-0.577  
12,47.237,rs2340376,-0.629  
12,47.276,rs7135769,-0.593  
12,47.351,rs10771219,-0.633  
12,47.381,rs11048064,-0.642  
12,47.418,rs1479509,-0.649  
12,47.429,rs7306993,-0.649  
12,47.585,rs16929064,-0.671  
12,47.790,rs7303492,-0.699  
12,48.229,rs7134325,-0.713  
12,48.253,rs853516,-0.713  
12,48.289,rs12306745,-0.707  
12,48.413,rs706540,-0.677  
12,48.648,rs11048376,-0.626  
12,48.675,rs11048393,-0.619  
12,48.769,rs6487539,-0.599  
12,48.784,rs11048431,-0.597  
12,48.802,rs16930371,-0.603  
12,48.811,rs1464054,-0.603  
12,48.827,rs7975017,-0.600  
12,48.862,rs12303723,-0.592  
12,48.865,rs10842712,-0.592  
12,48.878,rs2171520,-0.551  
12,48.896,rs10771279,-0.551  
12,48.898,rs10771281,-0.536  
12,48.902,rs11614012,-0.459  
12,48.906,rs12229047,-0.463  
12,48.938,rs12366669,-0.498  
12,48.959,rs1565190,-0.505  
12,49.071,rs11048627,-0.459  
12,49.109,rs10771293,-0.461  
12,49.116,rs11048661,-0.462  
12,49.120,rs11048665,-0.464  
12,49.179,rs1994474,-0.497  
12,49.234,rs7312159,-0.546  
12,49.259,rs3210635,-0.568  
12,49.320,rs1388658,-0.577  
12,49.328,rs1484087,-0.578  
12,49.351,rs1388659,-0.579  
12,49.423,rs841614,-0.582

12,49.582,rs7297695,-0.589  
12,49.905,rs11048977,-0.603  
12,50.124,rs16931921,-0.590  
12,50.516,rs11048994,-0.561  
12,50.564,rs4964060,-0.537  
12,50.679,rs10843013,-0.573  
12,50.715,rs7978444,-0.573  
12,50.778,rs27633,-0.567  
12,50.792,rs42294,-0.573  
12,50.838,rs7976725,-0.577  
12,50.886,rs10843085,-0.601  
12,51.193,rs1552760,-0.547  
12,51.385,rs12314459,-0.631  
12,51.389,rs12819319,-0.628  
12,51.439,rs12368897,-0.584  
12,51.490,rs10506041,-0.581  
12,51.516,rs7962495,-0.582  
12,51.639,rs7308031,-0.573  
12,51.707,rs1387246,-0.559  
12,51.861,rs2196488,-0.489  
12,51.993,rs11050146,-0.535  
12,52.070,rs10771512,-0.557  
12,52.257,rs1436321,-0.537  
12,52.380,rs10843438,-0.570  
12,52.384,rs7311526,-0.571  
12,52.398,rs299441,-0.569  
12,52.400,rs2216859,-0.568  
12,52.565,rs10771553,-0.475  
12,52.574,rs7955592,-0.437  
12,52.621,rs12823875,-0.469  
12,52.648,rs2033036,-0.474  
12,52.662,rs16934752,-0.480  
12,52.690,rs2216979,-0.491  
12,52.715,rs7959334,-0.481  
12,52.725,rs61803,-0.484  
12,52.761,rs302334,-0.495  
12,52.763,rs302335,-0.495  
12,52.927,rs2220130,-0.510  
12,53.054,rs10843570,-0.485  
12,53.099,rs2647384,-0.477  
12,53.108,rs11050595,-0.475  
12,53.158,rs10506052,-0.461  
12,53.158,rs10506053,-0.461  
12,53.202,rs6487871,-0.405  
12,53.244,rs7959715,-0.388  
12,53.244,rs12579700,-0.388  
12,53.372,rs7297032,-0.384  
12,53.438,rs10843660,-0.411  
12,53.506,rs10843712,-0.415  
12,53.529,rs4032080,-0.410  
12,53.713,rs1905675,-0.427  
12,53.726,rs16906532,-0.423  
12,53.730,rs794165,-0.421  
12,53.731,rs11050953,-0.421  
12,53.742,rs956503,-0.417  
12,53.766,rs1258276,-0.405  
12,53.828,rs6487927,-0.444  
12,53.907,rs11051065,-0.406  
12,53.926,rs2434118,-0.397  
12,53.947,rs2352525,-0.403  
12,53.958,rs10843843,-0.408

12,53.966,rs33162,-0.407  
12,53.984,rs11612603,-0.402  
12,53.995,rs256722,-0.416  
12,54.022,rs807477,-0.428  
12,54.034,rs33219,-0.431  
12,54.039,rs7979386,-0.402  
12,54.048,rs11613187,-0.357  
12,54.057,rs10771783,-0.346  
12,54.060,rs2075367,-0.373  
12,54.096,rs11051189,-0.338  
12,54.109,rs4931398,-0.318  
12,54.126,rs1009290,-0.307  
12,54.128,rs35065,-0.308  
12,54.237,rs10843881,-0.331  
12,54.302,rs10843894,-0.375  
12,54.441,rs684454,-0.299  
12,54.446,rs7954014,-0.268  
12,54.511,rs4931477,-0.295  
12,54.607,rs2568901,-0.241  
12,55.021,rs7312635,-0.210  
12,55.023,rs10771858,-0.210  
12,55.024,rs11051493,-0.210  
12,55.045,rs2170768,-0.208  
12,55.085,rs6488004,-0.207  
12,55.092,rs7314409,-0.207  
12,55.096,rs6488007,-0.200  
12,55.103,rs1150965,-0.175  
12,55.109,rs11051595,-0.175  
12,55.142,rs1259704,-0.182  
12,55.156,rs1666224,-0.185  
12,55.201,rs10844075,-0.191  
12,55.213,rs4931593,-0.193  
12,55.215,rs10844087,-0.194  
12,55.236,rs2388966,-0.226  
12,55.240,rs2630583,-0.222  
12,55.245,rs2630594,-0.216  
12,55.255,rs3867162,-0.220  
12,55.277,rs7961369,-0.204  
12,55.278,rs1809241,-0.155  
12,55.322,rs2593996,-0.121  
12,55.338,rs155202,-0.126  
12,55.342,rs325435,-0.125  
12,55.354,rs2651364,-0.127  
12,55.394,rs4931016,-0.124  
12,55.394,rs10844235,-0.124  
12,55.430,rs11052134,-0.126  
12,55.463,rs10771991,-0.127  
12,55.502,rs7954545,-0.123  
12,55.506,rs7977818,-0.122  
12,55.509,rs11610384,-0.121  
12,55.562,rs17554434,-0.122  
12,55.719,rs11053068,-0.128  
12,55.757,rs11053191,-0.133  
12,56.465,rs7313317,-0.141  
12,56.487,rs826893,-0.141  
12,56.500,rs12308699,-0.141  
12,56.505,rs10506128,-0.141  
12,56.512,rs11169878,-0.141  
12,56.922,rs718150,-0.138  
12,56.934,rs11170859,-0.137  
12,56.941,rs4403834,-0.137

12,56.947,rs7966147,-0.137  
12,56.966,rs4565943,-0.137  
12,57.051,rs11171902,-0.145  
12,57.079,rs7974928,-0.148  
12,57.160,rs12582802,-0.163  
12,57.184,rs4129477,-0.164  
12,57.251,rs11611119,-0.157  
12,57.333,rs7969011,-0.148  
12,57.347,rs545385,-0.147  
12,57.363,rs7964150,-0.145  
12,57.406,rs4768212,-0.147  
12,57.437,rs726330,-0.148  
12,57.444,rs2638259,-0.150  
12,57.470,rs2723260,-0.158  
12,57.548,rs10735934,-0.153  
12,57.554,rs11176143,-0.153  
12,57.584,rs11564263,-0.147  
12,57.612,rs10784618,-0.124  
12,57.614,rs11564228,-0.124  
12,57.693,rs7960018,-0.118  
12,57.703,rs10506170,-0.117  
12,57.717,rs17128536,-0.110  
12,57.735,rs11177540,-0.101  
12,57.745,rs1918954,-0.096  
12,57.793,rs1584093,-0.094  
12,57.817,rs10879153,-0.096  
12,57.842,rs1119059,-0.097  
12,57.894,rs11178907,-0.117  
12,57.895,rs12316203,-0.117  
12,57.928,rs1442192,-0.115  
12,57.997,rs12304938,-0.115  
12,58.008,rs534783,-0.114  
12,58.139,rs12314080,-0.108  
12,58.276,rs285595,-0.079  
12,58.306,rs366921,-0.071  
12,58.358,rs10785280,-0.057  
12,58.400,rs904076,-0.058  
12,58.400,rs11181154,-0.058  
12,58.459,rs2215455,-0.044  
12,58.473,rs10880209,-0.033  
12,58.480,rs1234028,-0.028  
12,58.602,rs6582383,-0.016  
12,58.715,rs1563419,-0.015  
12,58.874,rs12822031,-0.019  
12,58.900,rs10785347,-0.023  
12,58.944,rs10880328,-0.035  
12,58.956,rs7962244,-0.041  
12,58.966,rs11181615,-0.045  
12,58.977,rs10785367,-0.035  
12,58.980,rs4480597,-0.035  
12,59.072,rs2468330,-0.043  
12,59.104,rs1474071,-0.042  
12,59.119,rs10880377,-0.040  
12,59.134,rs7962560,-0.038  
12,59.160,rs7311715,-0.045  
12,59.201,rs10785408,-0.031  
12,59.228,rs1185604,-0.041  
12,59.252,rs10880418,-0.037  
12,59.400,rs2134067,-0.014  
12,59.414,rs7954281,-0.015  
12,59.563,rs2047770,-0.023

12,59.587,rs166700,-0.024  
12,59.629,rs277248,-0.027  
12,59.632,rs277241,-0.027  
12,59.661,rs986191,-0.028  
12,59.917,rs11182382,-0.034  
12,60.090,rs12828607,-0.039  
12,60.155,rs10506247,-0.035  
12,60.184,rs869628,-0.036  
12,60.254,rs1037435,-0.052  
12,60.268,rs12423103,-0.054  
12,60.306,rs10506255,-0.050  
12,60.329,rs1551082,-0.048  
12,60.361,rs2710459,-0.048  
12,60.436,rs7975969,-0.045  
12,60.464,rs10467207,-0.045  
12,61.116,rs10880789,-0.039  
12,61.353,rs2408268,-0.041  
12,61.377,rs7964768,-0.039  
12,61.441,rs2544098,-0.041  
12,61.466,rs10880823,-0.040  
12,61.509,rs10082730,-0.035  
12,61.618,rs10492248,-0.014  
12,62.153,rs17662709,-0.009  
12,62.200,rs1012642,-0.009  
12,62.284,rs7967938,-0.010  
12,62.325,rs7304591,-0.015  
12,62.328,rs1373549,-0.015  
12,62.394,rs1867500,-0.030  
12,62.414,rs7301594,-0.037  
12,62.417,rs2053648,-0.049  
12,62.420,rs3742060,-0.037  
12,62.441,rs11615731,-0.038  
12,62.442,rs11183395,-0.038  
12,62.442,rs12828089,-0.051  
12,62.461,rs11183403,-0.052  
12,62.708,rs10785630,-0.041  
12,62.785,rs4768745,-0.035  
12,62.859,rs11183620,-0.029  
12,62.988,rs17097506,-0.030  
12,63.018,rs854889,-0.021  
12,63.025,rs739706,-0.019  
12,63.032,rs727363,-0.017  
12,63.036,rs11610123,-0.016  
12,63.039,rs17097611,-0.016  
12,63.041,rs1880601,-0.016  
12,63.056,rs12320513,-0.016  
12,63.083,rs9888310,-0.017  
12,63.107,rs214710,-0.018  
12,63.113,rs214697,-0.018  
12,63.133,rs12315929,-0.019  
12,63.144,rs214678,-0.018  
12,63.163,rs214656,-0.013  
12,63.169,rs855137,-0.011  
12,63.204,rs11183921,-0.008  
12,63.210,rs7955860,-0.008  
12,63.225,rs1468195,-0.008  
12,63.283,rs1029429,-0.010  
12,63.301,rs11168123,-0.009  
12,63.418,rs1153978,-0.006  
12,63.472,rs929270,-0.011  
12,63.515,rs4760653,-0.010

12,63.528,rs3759407,-0.010  
12,63.535,rs757344,-0.010  
12,63.537,rs11168249,-0.009  
12,63.542,rs1859281,-0.008  
12,63.569,rs2239182,-0.003  
12,63.586,rs4760648,-0.001  
12,63.697,rs7299704,-0.005  
12,63.823,rs7134565,-0.010  
12,63.900,rs2732439,-0.014  
12,63.946,rs4489787,-0.018  
12,63.990,rs2731063,-0.026  
12,64.045,rs3782353,-0.037  
12,64.126,rs10875914,-0.042  
12,64.163,rs833836,-0.040  
12,64.375,rs11834543,-0.036  
12,64.463,rs7486836,-0.046  
12,64.478,rs12322335,-0.045  
12,64.570,rs4898506,-0.044  
12,64.687,rs1031477,-0.051  
12,64.992,rs836964,-0.028  
12,65.111,rs956864,-0.020  
12,65.167,rs638515,-0.020  
12,65.186,rs297941,-0.015  
12,65.213,rs296736,-0.008  
12,65.242,rs1996315,-0.001  
12,65.284,rs602772,-0.001  
12,65.294,rs7131715,-0.001  
12,66.736,rs2684908,-0.001  
12,66.997,rs4768933,-0.002  
12,67.436,rs10876136,0.001  
12,67.749,rs10783425,0.003  
12,67.830,rs17125588,0.003  
12,67.941,rs4762042,0.002  
12,68.024,rs907347,0.004  
12,68.074,rs3825219,0.027  
12,68.075,rs3759177,0.027  
12,68.077,rs7299315,0.027  
12,68.107,rs1021996,0.020  
12,68.357,rs7305599,0.019  
12,68.609,rs10876202,0.006  
12,68.830,rs6580842,0.001  
12,68.871,rs2083600,0.001  
12,68.874,rs303797,0.001  
12,68.876,rs7976059,0.001  
12,68.880,rs1566869,0.001  
12,68.898,rs2859593,0.004  
12,68.907,rs12809597,0.005  
12,68.924,rs1283168,0.007  
12,68.929,rs2701129,0.003  
12,68.939,rs6580850,0.002  
12,69.007,rs7300165,0.001  
12,69.029,rs12312219,0.000  
12,69.044,rs10783492,0.000  
12,69.055,rs10876239,0.000  
12,69.056,rs11829800,0.000  
12,69.056,rs9669529,0.000  
12,69.073,rs2085502,-0.000  
12,69.075,rs11170034,-0.000  
12,69.084,rs17704963,-0.000  
12,69.144,rs7300317,0.001  
12,69.213,rs6580873,0.001



12,69.240,rs6580876,0.003  
12,69.339,rs1732285,0.004  
12,69.377,rs928993,0.005  
12,69.432,rs597340,0.005  
12,69.539,rs11170164,0.009  
12,69.540,rs12821071,0.009  
12,69.558,rs669379,0.010  
12,69.564,rs644524,0.010  
12,69.582,rs10747643,0.010  
12,69.608,rs637608,0.010  
12,69.647,rs7295084,0.008  
12,69.711,rs589619,0.005  
12,69.761,rs2741158,0.007  
12,69.834,rs662170,0.008  
12,69.855,rs1521338,0.009  
12,69.932,rs4454802,0.013  
12,69.933,rs1994755,0.013  
12,69.952,rs876407,0.005  
12,70.037,rs11170319,0.006  
12,70.093,rs2055036,0.007  
12,70.147,rs10876395,0.004  
12,70.188,rs10431493,0.004  
12,70.221,rs2280699,0.003  
12,70.305,rs1554753,-0.000  
12,70.306,rs3741434,-0.000  
12,70.353,rs4758963,-0.001  
12,70.513,rs784563,-0.001  
12,70.817,rs1864448,-0.002  
12,70.834,rs17765253,-0.002  
12,70.841,rs12309211,-0.003  
12,70.849,rs3741659,-0.009  
12,70.920,rs6580960,-0.030  
12,70.967,rs17103077,-0.036  
12,70.997,rs11170702,-0.038  
12,71.067,rs6580968,-0.048  
12,71.148,rs10735853,-0.063  
12,71.199,rs2366150,-0.054  
12,71.250,rs4759316,-0.047  
12,71.346,rs2067554,-0.042  
12,71.459,rs7310681,-0.040  
12,71.486,rs12322894,-0.045  
12,71.721,rs7964528,-0.091  
12,71.775,rs3825192,-0.104  
12,71.863,rs10783629,-0.126  
12,71.867,rs7299852,-0.126  
12,71.886,rs7310321,-0.131  
12,71.904,rs2270581,-0.134  
12,71.904,rs1795838,-0.134  
12,71.921,rs7974201,-0.133  
12,71.925,rs4758966,-0.134  
12,71.959,rs3782410,-0.150  
12,71.962,rs1249950,-0.152  
12,72.018,rs11832807,-0.182  
12,72.049,rs1495926,-0.195  
12,72.070,rs7964380,-0.205  
12,72.083,rs1692108,-0.207  
12,72.132,rs266667,-0.187  
12,72.145,rs2124048,-0.182  
12,72.259,rs17116558,-0.145  
12,72.314,rs7135506,-0.136  
12,72.332,rs1463652,-0.135

12,72.377,rs2710697,-0.139  
12,72.410,rs2633414,-0.149  
12,72.655,rs10876739,-0.195  
12,72.658,rs6581029,-0.195  
12,72.686,rs7132600,-0.191  
12,72.892,rs10876902,-0.236  
12,72.969,rs17541818,-0.265  
12,72.983,rs17445108,-0.272  
12,73.017,rs10876931,-0.288  
12,73.050,rs7314055,-0.277  
12,73.077,rs733629,-0.284  
12,73.103,rs1059513,-0.290  
12,73.109,rs324013,-0.291  
12,73.135,rs1800159,-0.287  
12,73.193,rs7486863,-0.213  
12,73.258,rs11172171,-0.206  
12,73.389,rs3809114,-0.195  
12,73.416,rs3825080,-0.196  
12,73.558,rs812315,-0.229  
12,73.722,rs12368653,-0.273  
12,73.902,rs17119981,-0.331  
12,73.921,rs1908537,-0.356  
12,73.921,rs11612472,-0.356  
12,73.927,rs6581191,-0.349  
12,73.930,rs4760224,-0.360  
12,73.939,rs2354997,-0.380  
12,73.945,rs10877143,-0.399  
12,73.958,rs4297507,-0.427  
12,73.959,rs2061202,-0.429  
12,73.962,rs10506363,-0.431  
12,73.969,rs7299020,-0.433  
12,73.990,rs2712506,-0.437  
12,74.021,rs957989,-0.453  
12,74.164,rs10783929,-0.473  
12,74.214,rs1850126,-0.475  
12,74.267,rs2221158,-0.475  
12,74.398,rs10877263,-0.514  
12,74.452,rs10877278,-0.509  
12,74.511,rs276046,-0.506  
12,74.511,rs7304975,-0.506  
12,74.757,rs7956657,-0.496  
12,74.768,rs10431559,-0.495  
12,74.923,rs7297578,-0.476  
12,74.951,rs12306142,-0.473  
12,74.960,rs10877395,-0.471  
12,75.386,rs4758868,-0.468  
12,75.947,rs2620870,-0.479  
12,76.209,rs4340119,-0.451  
12,76.219,rs10877601,-0.452  
12,76.369,rs10784209,-0.488  
12,76.375,rs2731375,-0.489  
12,76.523,rs1901887,-0.564  
12,76.556,rs1377613,-0.571  
12,76.595,rs7296490,-0.573  
12,76.772,rs6581420,-0.602  
12,76.937,rs3759288,-0.630  
12,76.948,rs10877756,-0.631  
12,76.957,rs7311671,-0.625  
12,77.063,rs10877775,-0.593  
12,77.186,rs1146077,-0.645  
12,77.234,rs1245438,-0.638

12,77.262,rs11174355,-0.636  
12,77.291,rs1920086,-0.689  
12,77.507,rs11174449,-0.662  
12,77.697,rs7958597,-0.652  
12,77.794,rs10877895,-0.661  
12,77.805,rs4763185,-0.657  
12,77.810,rs2172930,-0.655  
12,77.818,rs10506445,-0.626  
12,77.844,rs1733488,-0.538  
12,77.855,rs11174601,-0.538  
12,77.871,rs3951389,-0.539  
12,77.896,rs2270484,-0.533  
12,77.917,rs11174629,-0.527  
12,77.933,rs4763194,-0.520  
12,77.971,rs549433,-0.516  
12,78.017,rs12829836,-0.491  
12,78.031,rs10506451,-0.524  
12,78.051,rs337514,-0.465  
12,78.068,rs10506454,-0.447  
12,78.095,rs699573,-0.493  
12,78.115,rs7296020,-0.563  
12,78.124,rs772577,-0.642  
12,78.130,rs699588,-0.652  
12,78.148,rs12311870,-0.690  
12,78.251,rs1250148,-0.913  
12,78.260,rs12814605,-0.932  
12,78.274,rs3913039,-0.957  
12,78.314,rs10877951,-0.979  
12,78.444,rs7962106,-1.010  
12,78.492,rs10506439,-1.024  
12,78.578,rs11174935,-1.013  
12,78.621,rs498768,-1.006  
12,78.686,rs11174965,-1.030  
12,78.997,rs3936640,-0.980  
12,79.249,rs4346062,-0.931  
12,79.284,rs2335882,-0.942  
12,79.322,rs1989584,-0.898  
12,79.326,rs10784374,-0.899  
12,79.328,rs17099949,-0.898  
12,79.372,rs7300256,-0.890  
12,79.455,rs6581527,-0.960  
12,79.693,rs2643665,-0.983  
12,79.888,rs12308116,-0.942  
12,79.889,rs7133188,-0.943  
12,80.037,rs7309367,-0.977  
12,80.098,rs11175398,-1.016  
12,80.201,rs2141765,-0.896  
12,80.217,rs4964110,-0.892  
12,80.293,rs1617260,-0.878  
12,80.444,rs508792,-0.754  
12,80.525,rs1269547,-0.754  
12,80.730,rs3741742,-0.655  
12,80.793,rs464817,-0.649  
12,80.831,rs7300655,-0.644  
12,80.844,rs4044903,-0.642  
12,80.921,rs11175623,-0.619  
12,80.991,rs1446527,-0.593  
12,81.033,rs7299766,-0.629  
12,81.336,rs10506528,-0.573  
12,81.443,rs17101291,-0.587  
12,81.561,rs4762096,-0.556

12,81.664,rs11175794,-0.563  
12,81.735,rs4237904,-0.681  
12,81.918,rs10784490,-0.629  
12,81.956,rs11175906,-0.651  
12,81.959,rs17225611,-0.653  
12,81.976,rs10784496,-0.663  
12,82.188,rs11175947,-0.535  
12,82.312,rs1480468,-0.518  
12,82.434,rs899844,-0.526  
12,82.478,rs17767008,-0.513  
12,82.581,rs11836463,-0.487  
12,82.612,rs10735933,-0.480  
12,82.678,rs17102070,-0.473  
12,82.812,rs1185629,-0.459  
12,82.844,rs8793,-0.459  
12,83.038,rs17826057,-0.462  
12,83.040,rs1152912,-0.462  
12,83.048,rs3782348,-0.463  
12,83.067,rs7972963,-0.456  
12,83.127,rs12579472,-0.432  
12,83.411,rs873908,-0.446  
12,83.471,rs6581696,-0.462  
12,83.526,rs7959694,-0.478  
12,83.544,rs11176204,-0.485  
12,83.609,rs12312548,-0.504  
12,83.662,rs7955946,-0.518  
12,83.663,rs7138741,-0.518  
12,83.664,rs12312692,-0.518  
12,83.729,rs7134781,-0.519  
12,83.840,rs1493481,-0.490  
12,83.931,rs11176353,-0.465  
12,83.932,rs4540902,-0.464  
12,83.951,rs10878485,-0.463  
12,83.953,rs1982664,-0.462  
12,83.969,rs17102790,-0.453  
12,84.003,rs6581712,-0.433  
12,84.036,rs4283063,-0.347  
12,84.049,rs11176383,-0.337  
12,84.073,rs1480008,-0.326  
12,84.214,rs7962776,-0.324  
12,84.224,rs12580444,-0.331  
12,84.291,rs975731,-0.369  
12,84.373,rs905697,-0.380  
12,84.375,rs4526844,-0.380  
12,84.380,rs1262101,-0.381  
12,84.386,rs12230530,-0.368  
12,84.389,rs10878536,-0.361  
12,84.397,rs7303407,-0.360  
12,84.405,rs774392,-0.335  
12,84.412,rs11176566,-0.315  
12,84.479,rs2870933,-0.276  
12,84.483,rs1920438,-0.272  
12,84.488,rs11176761,-0.234  
12,84.489,rs10506554,-0.230  
12,84.493,rs2700062,-0.180  
12,84.497,rs2700559,-0.182  
12,84.498,rs11836797,-0.183  
12,84.500,rs2904501,-0.186  
12,84.504,rs1731541,-0.195  
12,84.506,rs2620758,-0.195  
12,84.508,rs1731543,-0.194

12,84.510,rs17104186,-0.189  
12,84.525,rs10784645,-0.163  
12,84.532,rs763948,-0.133  
12,84.539,rs11176874,-0.150  
12,84.540,rs10492203,-0.150  
12,84.676,rs11176925,-0.135  
12,84.775,rs7312407,-0.121  
12,84.909,rs10748093,-0.106  
12,84.989,rs17629076,-0.121  
12,84.998,rs4913395,-0.122  
12,85.103,rs10748101,-0.118  
12,85.111,rs3782553,-0.118  
12,85.123,rs2046068,-0.122  
12,85.131,rs10506557,-0.126  
12,85.153,rs9325187,-0.138  
12,85.154,rs4913436,-0.139  
12,85.156,rs12309517,-0.138  
12,85.161,rs2127536,-0.135  
12,85.166,rs7133383,-0.131  
12,85.178,rs686283,-0.126  
12,85.179,rs378862,-0.125  
12,85.180,rs11177201,-0.102  
12,85.183,rs11177206,-0.082  
12,85.186,rs10878824,-0.082  
12,85.216,rs10878841,-0.085  
12,85.227,rs1442275,-0.085  
12,85.252,rs2468411,-0.095  
12,85.312,rs10784723,-0.109  
12,85.362,rs4913470,-0.134  
12,85.364,rs2120741,-0.135  
12,85.380,rs1565862,-0.136  
12,85.415,rs11836417,-0.126  
12,85.481,rs6581852,-0.143  
12,85.502,rs10784762,-0.148  
12,85.505,rs4075026,-0.149  
12,85.521,rs6581864,-0.148  
12,85.553,rs7488555,-0.146  
12,85.561,rs4761161,-0.146  
12,85.576,rs4761264,-0.130  
12,85.585,rs6581884,-0.121  
12,85.727,rs2168029,-0.097  
12,85.744,rs3825243,-0.097  
12,85.747,rs2306204,-0.096  
12,85.814,rs732214,-0.077  
12,85.825,rs10878983,-0.089  
12,85.976,rs547497,-0.102  
12,86.037,rs776207,-0.093  
12,86.051,rs796538,-0.091  
12,86.075,rs7310083,-0.120  
12,86.286,rs1531302,-0.216  
12,86.298,rs1630148,-0.218  
12,86.339,rs1152977,-0.227  
12,86.341,rs1152969,-0.227  
12,86.350,rs2307087,-0.225  
12,86.376,rs710671,-0.210  
12,86.407,rs10879109,-0.177  
12,86.439,rs3817487,-0.173  
12,86.455,rs6581940,-0.174  
12,86.457,rs787931,-0.176  
12,86.460,rs438847,-0.179  
12,86.485,rs2584028,-0.283

12,86.487,rs2567133,-0.273  
12,86.487,rs2116209,-0.273  
12,86.489,rs2717440,-0.226  
12,86.493,rs2717418,-0.229  
12,86.502,rs2439732,-0.198  
12,86.522,rs6581958,-0.177  
12,86.532,rs4760933,-0.171  
12,86.534,rs1513098,-0.169  
12,86.547,rs2048607,-0.198  
12,86.586,rs10784870,-0.209  
12,86.620,rs11178455,-0.221  
12,86.731,rs7310543,-0.219  
12,86.732,rs3924187,-0.219  
12,86.940,rs11178515,-0.187  
12,87.020,rs11178523,-0.159  
12,87.183,rs7316843,-0.075  
12,87.203,rs1872824,-0.053  
12,87.248,rs10784953,-0.043  
12,87.255,rs7316840,-0.045  
12,87.257,rs7485207,-0.046  
12,87.264,rs10879389,-0.051  
12,87.276,rs10784961,-0.042  
12,87.278,rs12811298,-0.040  
12,87.335,rs997590,-0.023  
12,87.372,rs461075,-0.029  
12,87.376,rs1433251,-0.029  
12,87.394,rs6421235,-0.023  
12,87.396,rs12315196,-0.023  
12,87.406,rs11179361,-0.020  
12,87.409,rs7298274,-0.020  
12,87.448,rs10784998,-0.018  
12,87.450,rs7963448,-0.019  
12,87.459,rs1516275,-0.022  
12,87.505,rs2176201,-0.033  
12,87.507,rs954967,-0.034  
12,87.640,rs1915297,-0.022  
12,87.808,rs764065,-0.016  
12,88.284,rs7305820,-0.014  
12,88.305,rs12426157,-0.013  
12,89.264,rs1461067,-0.006  
12,89.356,rs2613903,-0.003  
12,89.444,rs7314330,-0.008  
12,89.456,rs1396162,-0.008  
12,89.483,rs17114198,-0.007  
12,89.503,rs7298459,-0.007  
12,89.559,rs17114354,-0.004  
12,89.686,rs1463506,-0.003  
12,89.720,rs735636,-0.002  
12,89.729,rs1463509,-0.000  
12,89.772,rs10735986,-0.000  
12,89.898,rs7300308,-0.000  
12,89.992,rs15513,0.000  
12,90.284,rs12578478,-0.001  
12,90.310,rs11180619,-0.000  
12,90.392,rs11180638,-0.008  
12,90.470,rs7488278,-0.010  
12,90.519,rs1275642,-0.010  
12,90.560,rs11180676,-0.014  
12,90.634,rs1299468,-0.023  
12,90.691,rs11180712,-0.027  
12,90.750,rs1623319,-0.028

12,90.795,rs11180738,-0.035  
12,90.803,rs11180742,-0.036  
12,90.833,rs2367440,-0.034  
12,90.853,rs1921484,-0.033  
12,90.905,rs1991853,-0.024  
12,90.934,rs11180772,-0.021  
12,90.977,rs11831987,-0.017  
12,90.984,rs10880020,-0.020  
12,91.006,rs2367444,-0.030  
12,91.033,rs7297654,-0.040  
12,91.048,rs7294433,-0.041  
12,91.085,rs7978288,-0.046  
12,91.263,rs7958986,-0.045  
12,91.369,rs11104268,-0.063  
12,91.377,rs17176000,-0.063  
12,91.398,rs6538180,-0.062  
12,91.793,rs7303892,-0.046  
12,91.908,rs2669017,-0.044  
12,91.975,rs7965589,-0.043  
12,91.995,rs7953372,-0.038  
12,92.001,rs12309141,-0.036  
12,92.033,rs974467,-0.025  
12,92.095,rs10862509,-0.015  
12,92.141,rs11115613,-0.013  
12,92.237,rs10862789,-0.008  
12,92.321,rs7316241,-0.003  
12,92.373,rs310886,-0.006  
12,92.404,rs10746338,-0.002  
12,92.425,rs431951,-0.001  
12,92.427,rs2242383,-0.001  
12,92.431,rs310802,-0.001  
12,92.581,rs1391707,-0.007  
12,92.626,rs11104156,-0.006  
12,92.684,rs4761363,-0.004  
12,92.796,rs1607784,-0.005  
12,92.817,rs6538140,-0.005  
12,92.839,rs10858749,-0.005  
12,92.885,rs1465070,-0.005  
12,92.889,rs10506742,-0.005  
12,92.916,rs798396,-0.005  
12,92.930,rs10506744,-0.005  
12,93.138,rs711105,-0.008  
12,93.217,rs1725872,-0.006  
12,93.218,rs11106131,-0.006  
12,93.334,rs7487814,-0.004  
12,93.391,rs7301579,-0.003  
12,93.445,rs11106871,-0.002  
12,93.488,rs1526905,-0.001  
12,93.535,rs2619062,-0.002  
12,93.620,rs17044607,-0.000  
12,93.629,rs1261724,-0.000  
12,93.631,rs17044634,0.000  
12,93.689,rs1731760,0.000  
12,93.755,rs17044832,0.001  
12,93.827,rs2694682,0.001  
12,93.848,rs11833552,0.002  
12,93.871,rs392773,0.002  
12,93.903,rs1020461,0.004  
12,93.906,rs300525,0.004  
12,93.927,rs17044997,0.004  
12,93.943,rs300493,0.005

12,93.997,rs952367,0.011  
12,94.019,rs1358274,0.012  
12,94.248,rs11109799,0.008  
12,94.248,rs1449460,0.008  
12,94.258,rs1036049,0.008  
12,94.280,rs733694,0.009  
12,94.526,rs1922660,0.013  
12,94.536,rs1521372,0.014  
12,94.724,rs4842407,0.026  
12,94.793,rs10778258,0.034  
12,94.874,rs1037996,0.054  
12,94.912,rs17046094,0.053  
12,94.980,rs1514920,0.055  
12,95.094,rs2950386,0.057  
12,95.235,rs6539284,0.057  
12,95.414,rs3849228,0.060  
12,95.454,rs1245775,0.079  
12,95.700,rs2463107,0.056  
12,95.712,rs6539525,0.062  
12,95.717,rs1358476,0.059  
12,95.796,rs9668261,0.059  
12,95.805,rs17007015,0.059  
12,95.822,rs1178704,0.060  
12,95.921,rs1163263,0.067  
12,96.117,rs10862207,0.081  
12,96.400,rs5027920,0.064  
12,96.413,rs7967650,0.064  
12,96.538,rs1921038,0.064  
12,96.560,rs1921057,0.064  
12,96.620,rs10862288,0.064  
12,96.768,rs1000933,0.062  
12,96.857,rs12814460,0.057  
12,96.976,rs2178686,0.067  
12,97.083,rs1344016,0.062  
12,97.224,rs6539598,0.062  
12,97.298,rs1529760,0.064  
12,97.338,rs12314791,0.067  
12,97.394,rs7295078,0.070  
12,97.411,rs3935340,0.072  
12,97.419,rs4842423,0.085  
12,97.463,rs7132518,0.095  
12,97.554,rs4561274,0.098  
12,97.678,rs7307305,0.102  
12,97.775,rs4620789,0.095  
12,97.795,rs11115376,0.092  
12,97.815,rs10862504,0.088  
12,97.854,rs11115451,0.086  
12,97.876,rs7295124,0.085  
12,97.907,rs1796209,0.082  
12,97.920,rs11115493,0.080  
12,98.032,rs10431415,0.045  
12,98.051,rs1543169,0.057  
12,98.060,rs7297393,0.077  
12,98.068,rs4882436,0.092  
12,98.085,rs10862975,0.068  
12,98.145,rs9943770,0.087  
12,98.162,rs7316875,0.086  
12,98.169,rs765365,0.086  
12,98.500,rs7960313,0.087  
12,98.570,rs1026085,0.085  
12,98.972,rs6538046,0.102



12,99.035,rs10492296,0.101  
12,99.110,rs2897395,0.100  
12,99.255,rs11104365,0.140  
12,99.271,rs11104397,0.154  
12,99.309,rs9971641,0.187  
12,99.362,rs1603406,0.199  
12,99.475,rs10858638,0.188  
12,99.509,rs1381138,0.185  
12,99.509,rs1381143,0.185  
12,99.578,rs11104736,0.144  
12,99.620,rs7302806,0.121  
12,99.665,rs4842610,0.097  
12,99.785,rs10506959,0.062  
12,99.895,rs11609946,0.041  
12,99.968,rs12311684,0.039  
12,99.980,rs11611632,0.038  
12,100.006,rs11105165,0.042  
12,100.027,rs7312093,0.044  
12,100.055,rs10161332,0.042  
12,100.125,rs979405,0.038  
12,100.194,rs796041,0.040  
12,100.232,rs2638470,0.027  
12,100.258,rs796038,0.028  
12,100.338,rs704061,0.034  
12,100.363,rs1689419,0.031  
12,100.389,rs770374,0.022  
12,100.497,rs2230283,0.023  
12,100.645,rs10858915,0.014  
12,100.687,rs10777190,0.017  
12,100.706,rs11105381,0.019  
12,100.730,rs1405780,0.020  
12,100.763,rs11105404,0.019  
12,100.802,rs1401985,0.017  
12,100.913,rs4635138,0.012  
12,101.107,rs7488228,0.005  
12,101.210,rs10506981,0.005  
12,101.221,rs934891,0.005  
12,101.423,rs10858976,0.011  
12,101.682,rs2051713,0.005  
12,101.736,rs763564,0.003  
12,101.760,rs11503340,0.002  
12,101.811,rs10859030,0.001  
12,101.883,rs7954238,0.001  
12,101.917,rs1354421,0.000  
12,101.944,rs6538248,0.002  
12,102.048,rs4272843,0.001  
12,102.053,rs10859077,0.001  
12,102.537,rs10859110,0.001  
12,103.007,rs1492917,0.004  
12,103.029,rs1389058,0.004  
12,103.043,rs11106114,0.004  
12,103.073,rs4842763,0.003  
12,103.075,rs1492945,0.003  
12,103.124,rs7966281,0.003  
12,103.166,rs12318659,0.002  
12,103.250,rs4399376,0.004  
12,103.267,rs17041033,0.004  
12,103.325,rs6538288,0.005  
12,103.332,rs1389478,0.005  
12,103.423,rs10777331,0.014  
12,103.452,rs7960822,0.015

12,103.555,rs4240750,0.021  
12,103.623,rs10859259,0.017  
12,103.630,rs4842814,0.017  
12,103.649,rs4567507,0.017  
12,103.671,rs7959206,0.019  
12,103.696,rs7132875,0.015  
12,103.749,rs2279577,0.006  
12,103.774,rs709220,0.002  
12,103.810,rs1658693,0.001  
12,103.858,rs790455,0.001  
12,103.888,rs12316546,0.002  
12,103.911,rs7968929,0.003  
12,103.924,rs337656,0.003  
12,103.936,rs11106496,0.003  
12,104.000,rs397324,0.003  
12,104.113,rs4760440,0.004  
12,104.171,rs12300203,0.012  
12,104.210,rs791223,0.019  
12,104.215,rs2385087,0.020  
12,104.273,rs2013116,0.027  
12,104.298,rs7306076,0.028  
12,104.362,rs1385060,0.033  
12,104.546,rs10859354,0.034  
12,104.691,rs2036553,0.038  
12,105.049,rs4760506,0.054  
12,105.084,rs6538367,0.055  
12,105.164,rs17020888,0.058  
12,105.202,rs10745626,0.059  
12,105.211,rs9788200,0.059  
12,105.281,rs10859423,0.063  
12,105.321,rs7972610,0.072  
12,105.349,rs7316595,0.079  
12,105.358,rs6538386,0.079  
12,105.407,rs7303148,0.075  
12,105.426,rs12300704,0.073  
12,105.450,rs975523,0.067  
12,105.526,rs10777483,0.052  
12,105.574,rs747098,0.046  
12,105.647,rs11106937,0.046  
12,105.708,rs930248,0.034  
12,105.725,rs7295103,0.033  
12,105.852,rs11107008,0.027  
12,105.856,rs7487813,0.027  
12,105.939,rs1483003,0.023  
12,106.099,rs10859513,0.024  
12,106.186,rs10745657,0.027  
12,106.287,rs11830104,0.013  
12,106.515,rs903173,0.010  
12,106.549,rs17837165,0.007  
12,106.556,rs10859584,0.006  
12,106.593,rs10859589,0.003  
12,106.609,rs12817202,0.002  
12,106.646,rs3858605,0.003  
12,106.658,rs10859598,0.003  
12,106.733,rs11614624,0.003  
12,106.792,rs10777557,0.004  
12,106.819,rs1946663,0.004  
12,106.893,rs7313703,0.004  
12,106.988,rs11107336,0.005  
12,106.993,rs4761547,0.005  
12,107.039,rs1036361,0.002

12,107.070,rs1434721,0.002  
12,107.105,rs10859660,0.002  
12,107.137,rs12298828,0.005  
12,107.154,rs6538484,0.007  
12,107.170,rs12099801,0.007  
12,107.179,rs11613298,0.007  
12,107.252,rs4761590,0.003  
12,107.261,rs3847809,0.004  
12,107.318,rs7298918,0.007  
12,107.338,rs12099862,0.007  
12,107.344,rs9943825,0.007  
12,107.370,rs870034,0.007  
12,107.375,rs2054724,0.007  
12,107.509,rs7979054,0.012  
12,107.811,rs7968386,0.022  
12,107.814,rs4761479,0.022  
12,107.832,rs11835904,0.022  
12,107.926,rs10859731,0.025  
12,107.930,rs17022749,0.025  
12,107.933,rs1316366,0.025  
12,107.944,rs17022770,0.026  
12,107.967,rs3747552,0.028  
12,108.001,rs4761650,0.042  
12,108.017,rs11107665,0.053  
12,108.019,rs11107669,0.054  
12,108.024,rs1316566,0.057  
12,108.027,rs7350629,0.053  
12,108.033,rs7963894,0.049  
12,108.042,rs3810784,0.042  
12,108.078,rs7308671,0.037  
12,108.106,rs6538556,0.030  
12,108.116,rs10507045,0.027  
12,108.165,rs17023454,0.026  
12,108.180,rs249189,0.027  
12,108.188,rs933900,0.027  
12,108.205,rs10859814,0.036  
12,108.213,rs17023557,0.043  
12,108.219,rs17321986,0.045  
12,108.251,rs11107875,0.050  
12,108.347,rs1436125,0.059  
12,108.367,rs11610070,0.043  
12,108.409,rs4762254,0.052  
12,108.436,rs4762643,0.049  
12,108.506,rs2300560,0.053  
12,108.522,rs11108368,0.042  
12,108.614,rs11108385,0.032  
12,108.625,rs7314867,0.031  
12,108.635,rs10860001,0.030  
12,108.656,rs4762661,0.023  
12,108.696,rs2540457,0.021  
12,108.721,rs11108403,0.021  
12,108.797,rs1861296,0.019  
12,108.808,rs34580,0.018  
12,108.829,rs34583,0.024  
12,108.841,rs34585,0.023  
12,108.844,rs256178,0.022  
12,108.879,rs10492224,0.021  
12,109.026,rs11835157,0.022  
12,109.027,rs2300552,0.022  
12,109.053,rs4762291,0.023  
12,109.367,rs11832122,0.037

12,109.388,rs1902753,0.039  
12,109.406,rs7957408,0.038  
12,109.694,rs1420617,0.020  
12,109.820,rs815911,0.020  
12,109.987,rs12581358,0.026  
12,110.054,rs11612412,0.029  
12,110.085,rs6538763,0.030  
12,110.152,rs995428,0.033  
12,110.186,rs983679,0.032  
12,110.266,rs10860152,0.030  
12,110.291,rs17026523,0.028  
12,110.365,rs10745787,0.024  
12,110.500,rs2216144,0.039  
12,110.549,rs10777847,0.038  
12,110.602,rs11108974,0.065  
12,110.676,rs12424969,0.060  
12,110.695,rs1861373,0.058  
12,110.697,rs1078709,0.058  
12,110.719,rs7298683,0.059  
12,110.731,rs10777859,0.060  
12,110.736,rs10507086,0.058  
12,110.756,rs10745796,0.054  
12,110.758,rs12321566,0.053  
12,110.804,rs10777864,0.076  
12,110.815,rs7963662,0.073  
12,110.841,rs12579455,0.068  
12,110.913,rs1993067,0.066  
12,110.937,rs11109114,0.067  
12,110.984,rs10860227,0.084  
12,111.057,rs12422443,0.083  
12,111.066,rs17027332,0.083  
12,111.138,rs40420,0.083  
12,111.140,rs1345364,0.083  
12,111.236,rs10444526,0.107  
12,111.377,rs2216022,0.079  
12,111.392,rs2011247,0.076  
12,111.431,rs6538846,0.074  
12,111.459,rs1531650,0.050  
12,111.465,rs7132475,0.049  
12,111.495,rs17027943,0.054  
12,111.540,rs1480082,0.054  
12,111.626,rs7134104,0.063  
12,111.654,rs10492291,0.065  
12,111.670,rs249833,0.062  
12,111.795,rs7964472,0.075  
12,111.959,rs201430,0.046  
12,111.961,rs201421,0.046  
12,111.964,rs169296,0.046  
12,111.967,rs200788,0.046  
12,111.969,rs1549102,0.048  
12,111.975,rs483610,0.056  
12,112.076,rs2638559,0.047  
12,112.105,rs2201161,0.049  
12,112.121,rs7954551,0.051  
12,112.128,rs2131163,0.053  
12,112.150,rs10860416,0.057  
12,112.215,rs4341626,0.085  
12,112.359,rs809794,0.098  
12,112.371,rs1039378,0.099  
12,112.615,rs7965793,0.151  
12,112.792,rs11110099,0.148

12,113.049,rs10778038,0.135  
12,113.543,rs12314464,0.120  
12,113.589,rs7311096,0.113  
12,113.615,rs1887276,0.143  
12,113.619,rs10860589,0.143  
12,113.638,rs2209702,0.146  
12,113.706,rs4764980,0.155  
12,113.719,rs7960489,0.154  
12,113.759,rs11110415,0.148  
12,113.802,rs35697,0.142  
12,113.844,rs1045603,0.129  
12,113.928,rs10778062,0.103  
12,113.930,rs10860622,0.102  
12,113.996,rs7957624,0.095  
12,114.027,rs10778077,0.092  
12,114.046,rs17401978,0.090  
12,114.050,rs10860638,0.090  
12,114.063,rs4764755,0.090  
12,114.096,rs938335,0.091  
12,114.118,rs10860654,0.092  
12,114.145,rs12312569,0.093  
12,114.198,rs7974164,0.095  
12,114.216,rs609728,0.096  
12,114.227,rs2673665,0.097  
12,114.234,rs11110622,0.097  
12,114.240,rs12298243,0.097  
12,114.336,rs7295262,0.094  
12,114.560,rs189488,0.077  
12,114.603,rs2712623,0.076  
12,114.607,rs1631980,0.076  
12,114.778,rs6538980,0.070  
12,114.957,rs11610301,0.060  
12,115.057,rs7967809,0.053  
12,115.069,rs11609579,0.053  
12,115.096,rs17416059,0.055  
12,115.126,rs17031482,0.054  
12,115.151,rs1566556,0.049  
12,115.162,rs950792,0.047  
12,115.179,rs7304176,0.058  
12,115.226,rs1405712,0.066  
12,115.282,rs825055,0.072  
12,115.284,rs844066,0.072  
12,115.335,rs6539009,0.067  
12,115.597,rs10860822,0.073  
12,115.604,rs7964241,0.073  
12,115.610,rs2888604,0.073  
12,115.639,rs9332443,0.084  
12,115.659,rs10745935,0.082  
12,115.884,rs10860845,0.074  
12,115.959,rs12305296,0.072  
12,116.282,rs11111293,0.079  
12,116.318,rs35760,0.081  
12,116.472,rs7309412,0.093  
12,116.473,rs10860901,0.093  
12,116.514,rs10507149,0.090  
12,116.541,rs7980567,0.088  
12,116.555,rs2172873,0.070  
12,116.567,rs879434,0.072  
12,116.608,rs11612372,0.090  
12,116.621,rs1722402,0.093  
12,116.689,rs1464789,0.086

12,116.743,rs1722383,0.069  
12,116.910,rs9782,0.099  
12,116.920,rs1353769,0.100  
12,116.925,rs17450273,0.101  
12,117.135,rs10778213,0.126  
12,117.242,rs7963232,0.144  
12,117.320,rs11111501,0.234  
12,117.331,rs17034439,0.279  
12,117.334,rs11111738,0.282  
12,117.336,rs1946821,0.289  
12,117.337,rs4981030,0.347  
12,117.338,rs17505525,0.360  
12,117.343,rs4981029,0.419  
12,117.356,rs2056128,0.451  
12,117.412,rs17034524,0.499  
12,117.423,rs7296900,0.502  
12,117.513,rs4964571,0.536  
12,117.621,rs7295268,0.530  
12,117.722,rs1165692,0.471  
12,117.787,rs1866074,0.464  
12,117.852,rs17035120,0.467  
12,118.036,rs10861159,0.473  
12,118.163,rs4255604,0.476  
12,118.246,rs10861171,0.477  
12,118.735,rs6539151,0.483  
12,118.755,rs12302097,0.483  
12,118.759,rs2468905,0.484  
12,118.774,rs11112046,0.484  
12,118.863,rs7958327,0.486  
12,118.872,rs7976582,0.485  
12,118.912,rs10778335,0.612  
12,118.918,rs10746001,0.618  
12,119.006,rs7137398,0.633  
12,119.184,rs7980528,0.726  
12,119.186,rs17812685,0.727  
12,119.280,rs2665742,0.682  
12,119.285,rs167510,0.700  
12,119.293,rs7298728,0.727  
12,119.486,rs2696004,0.613  
12,119.495,rs12581164,0.614  
12,119.500,rs2559639,0.615  
12,119.564,rs835487,0.589  
12,119.590,rs703669,0.534  
12,119.650,rs312145,0.482  
12,119.689,rs835495,0.400  
12,119.690,rs2081807,0.388  
12,119.691,rs10861271,0.374  
12,119.705,rs7314687,0.310  
12,119.707,rs2280685,0.301  
12,119.726,rs2029737,0.287  
12,119.762,rs312154,0.319  
12,120.211,rs10861282,0.307  
12,120.721,rs11112315,0.333  
12,121.221,rs1196865,0.352  
12,121.365,rs11112511,0.351  
12,121.367,rs4964364,0.350  
12,121.377,rs1432589,0.345  
12,121.391,rs1347100,0.369  
12,121.400,rs17037213,0.364  
12,121.403,rs2177938,0.364  
12,121.430,rs10861453,0.359

12,121.445,rs3915229,0.366  
12,121.455,rs2374514,0.372  
12,121.482,rs4590981,0.387  
12,121.488,rs7134108,0.391  
12,121.495,rs2888865,0.381  
12,121.503,rs10507198,0.362  
12,121.522,rs7960156,0.372  
12,121.527,rs10861501,0.367  
12,121.528,rs1806477,0.365  
12,121.590,rs1345551,0.387  
12,121.617,rs1421438,0.405  
12,121.666,rs1421444,0.449  
12,121.735,rs7299479,0.454  
12,121.744,rs2111978,0.455  
12,121.751,rs1862026,0.452  
12,121.829,rs2468197,0.455  
12,121.913,rs1148427,0.398  
12,122.031,rs7959575,0.338  
12,122.032,rs10459209,0.390  
12,122.033,rs1215761,0.406  
12,122.034,rs1148416,0.406  
12,122.078,rs1148409,0.402  
12,122.216,rs2264759,0.359  
12,122.351,rs6539274,0.333  
12,122.399,rs13378019,0.350  
12,122.419,rs10778494,0.359  
12,122.433,rs969802,0.361  
12,122.877,rs1024855,0.388  
12,123.108,rs11113179,0.429  
12,123.174,rs12315175,0.439  
12,123.183,rs10861709,0.441  
12,123.270,rs2374671,0.408  
12,123.521,rs7965742,0.400  
12,123.594,rs2374689,0.398  
12,123.730,rs12309162,0.371  
12,123.769,rs7958562,0.363  
12,123.826,rs10778548,0.361  
12,123.866,rs10861732,0.360  
12,123.965,rs12422367,0.359  
12,124.165,rs11837333,0.362  
12,124.276,rs7309802,0.381  
12,124.300,rs12322163,0.398  
12,124.320,rs6539357,0.412  
12,124.355,rs3741786,0.408  
12,124.401,rs7968311,0.415  
12,124.493,rs7312873,0.417  
12,124.674,rs11835862,0.395  
12,124.716,rs7302869,0.395  
12,124.748,rs10746112,0.395  
12,124.776,rs10746116,0.442  
12,124.790,rs1344608,0.446  
12,124.843,rs11113776,0.488  
12,124.863,rs9739493,0.466  
12,124.888,rs17041392,0.487  
12,124.897,rs11113808,0.494  
12,124.898,rs1878022,0.495  
12,124.900,rs4964246,0.471  
12,124.903,rs2374985,0.397  
12,124.914,rs952584,0.342  
12,124.936,rs803556,0.332  
12,125.002,rs12425076,0.347

12,125.015,rs2160974,0.356  
12,125.025,rs10778642,0.361  
12,125.070,rs10861946,0.387  
12,125.076,rs10861950,0.386  
12,125.105,rs3782522,0.394  
12,125.147,rs10746129,0.396  
12,125.267,rs2111902,0.355  
12,125.287,rs10861980,0.371  
12,125.296,rs7313861,0.418  
12,125.419,rs10774961,0.389  
12,125.420,rs16939904,0.388  
12,125.441,rs34263,0.349  
12,125.492,rs4300440,0.286  
12,125.496,rs2284691,0.287  
12,125.498,rs2268389,0.286  
12,125.511,rs4766584,0.290  
12,125.519,rs2241220,0.293  
12,125.546,rs10774641,0.336  
12,125.551,rs7959782,0.333  
12,125.586,rs10850058,0.311  
12,125.764,rs11615462,0.237  
12,125.785,rs714880,0.222  
12,125.795,rs12305576,0.189  
12,125.813,rs11067915,0.183  
12,125.870,rs10735104,0.163  
12,125.903,rs6606743,0.137  
12,126.405,rs7956133,0.138  
12,127.034,rs11065774,0.142  
12,127.078,rs6489844,0.141  
12,127.588,rs11065854,0.134  
12,129.191,rs11611847,0.120  
12,129.482,rs1362036,0.118  
12,129.871,rs233722,0.114  
12,129.974,rs232921,0.115  
12,130.003,rs7314882,0.114  
12,130.187,rs10850078,0.125  
12,130.197,rs3803061,0.126  
12,130.283,rs7309495,0.121  
12,130.410,rs12177,0.113  
12,130.434,rs3741981,0.114  
12,130.608,rs916973,0.142  
12,130.628,rs10492029,0.147  
12,130.737,rs1732803,0.166  
12,130.796,rs1284879,0.155  
12,130.841,rs1284883,0.164  
12,130.999,rs2098922,0.159  
12,131.057,rs1863534,0.154  
12,131.172,rs739,0.143  
12,131.337,rs11066637,0.126  
12,131.484,rs249047,0.106  
12,131.572,rs641021,0.082  
12,131.575,rs606364,0.081  
12,131.590,rs10744800,0.075  
12,131.617,rs741628,0.066  
12,131.639,rs12423428,0.062  
12,131.651,rs16943226,0.053  
12,131.661,rs4767133,0.034  
12,131.675,rs964401,0.033  
12,131.736,rs3782458,0.030  
12,131.744,rs11066827,0.030  
12,131.766,rs16943516,0.030



12,131.778,rs1350524,0.030  
12,131.802,rs12313095,0.030  
12,131.808,rs1458705,0.029  
12,131.811,rs7307803,0.029  
12,131.865,rs768257,0.026  
12,132.137,rs1920584,0.014  
12,132.146,rs741637,0.014  
12,132.194,rs964499,0.013  
12,132.258,rs1920563,0.012  
12,132.275,rs1265496,0.011  
12,132.310,rs1882115,0.009  
12,132.319,rs10507243,0.008  
12,132.361,rs1896003,0.009  
12,132.454,rs10850330,0.010  
12,132.460,rs7137598,0.010  
12,132.468,rs4113925,0.004  
12,132.472,rs2551394,0.005  
12,132.478,rs10850336,0.008  
12,132.494,rs1895602,0.016  
12,132.503,rs2113436,0.021  
12,132.557,rs16944288,0.024  
12,132.569,rs1522361,0.024  
12,132.720,rs1427762,0.010  
12,132.780,rs997821,0.005  
12,132.839,rs12581328,0.002  
12,132.845,rs4073170,0.002  
12,132.913,rs6489968,0.000  
12,132.981,rs10744833,-0.000  
12,132.984,rs10850375,-0.000  
12,133.031,rs16944632,-0.000  
12,133.063,rs10774771,0.000  
12,133.074,rs3923317,0.000  
12,133.124,rs7137643,0.000  
12,133.155,rs7301908,0.000  
12,133.184,rs7967062,-0.000  
12,133.249,rs1896350,-0.000  
12,133.299,rs1317715,-0.002  
12,133.307,rs7310469,-0.002  
12,133.326,rs11067363,-0.002  
12,133.334,rs10850426,-0.003  
12,133.342,rs7957465,-0.003  
12,133.361,rs7972261,-0.003  
12,133.379,rs35516,-0.004  
12,133.407,rs1834608,-0.005  
12,133.461,rs35458,-0.003  
12,133.484,rs35444,-0.003  
12,133.488,rs12820517,-0.002  
12,133.506,rs11067430,-0.001  
12,133.512,rs10492264,-0.001  
12,133.516,rs1828384,-0.001  
12,133.534,rs254692,-0.000  
12,133.541,rs35372,-0.000  
12,133.568,rs35341,0.000  
12,133.703,rs1732598,0.000  
12,133.778,rs10774805,0.002  
12,133.799,rs2141693,0.003  
12,133.816,rs16945435,0.003  
12,133.855,rs10507259,0.004  
12,133.881,rs2464266,0.005  
12,133.885,rs10507260,0.005  
12,133.976,rs10507262,0.005

12,134.004,rs4767329,0.005  
12,134.026,rs11067633,0.006  
12,134.037,rs11067643,0.006  
12,134.041,rs7311298,0.006  
12,134.126,rs7974562,0.008  
12,134.198,rs1965295,0.007  
12,134.262,rs12322455,0.007  
12,134.276,rs2035587,0.007  
12,134.439,rs11067753,0.005  
12,134.446,rs1084062,0.002  
12,134.461,rs780876,-0.001  
12,134.513,rs780881,-0.000  
12,134.540,rs17719439,-0.000  
12,134.595,rs1647105,-0.001  
12,134.601,rs1520177,-0.001  
12,134.743,rs1861870,-0.002  
12,134.818,rs697877,-0.005  
12,134.965,rs11067825,-0.005  
12,135.096,rs17497950,-0.006  
12,135.105,rs7953197,-0.006  
12,136.280,rs11615846,-0.013  
12,136.321,rs10850601,-0.013  
12,136.355,rs7295770,-0.011  
12,136.356,rs17499173,-0.011  
12,136.416,rs7972837,-0.007  
12,136.428,rs6490057,-0.005  
12,136.464,rs1567910,-0.003  
12,136.524,rs2393042,-0.004  
12,136.533,rs6490059,-0.004  
12,136.554,rs1151899,-0.003  
12,136.651,rs17615178,-0.001  
12,136.759,rs2253009,-0.000  
12,136.791,rs11610927,-0.000  
12,137.049,rs11068058,-0.004  
12,137.064,rs4767420,-0.005  
12,137.195,rs4766796,-0.020  
12,137.248,rs12307600,-0.019  
12,137.276,rs7314617,-0.019  
12,137.348,rs2077158,-0.020  
12,137.394,rs1011493,-0.011  
12,137.408,rs10850694,-0.014  
12,137.422,rs1009981,-0.014  
12,137.487,rs339460,-0.014  
12,137.581,rs2088236,-0.009  
12,137.831,rs4766819,-0.003  
12,137.857,rs11068282,-0.003  
12,137.898,rs4529958,-0.002  
12,137.900,rs1051879,-0.002  
12,137.911,rs1875144,-0.002  
12,137.975,rs12371268,-0.001  
12,137.996,rs10850759,-0.002  
12,138.002,rs10850760,-0.002  
12,138.029,rs6490111,-0.003  
12,138.032,rs957363,-0.003  
12,138.077,rs816353,-0.000  
12,138.147,rs545654,-0.001  
12,138.167,rs11068458,-0.001  
12,138.188,rs10850820,-0.001  
12,138.232,rs7306852,-0.003  
12,138.233,rs816284,-0.003  
12,138.260,rs1093309,-0.004

12,138.262,rs1093305,-0.003  
12,138.359,rs708855,-0.000  
12,138.365,rs1004361,-0.000  
12,138.389,rs816183,-0.000  
12,138.409,rs816204,-0.000  
12,138.421,rs10774935,-0.001  
12,138.600,rs11609285,-0.001  
12,138.706,rs487894,-0.008  
12,138.766,rs634264,-0.013  
12,138.781,rs500037,-0.013  
12,138.846,rs975666,-0.015  
12,138.885,rs479810,-0.017  
12,138.933,rs11068674,-0.017  
12,138.952,rs631531,-0.016  
12,138.983,rs7972142,-0.015  
12,139.157,rs2723279,-0.010  
12,139.166,rs2466453,-0.010  
12,139.201,rs2570560,-0.013  
12,139.240,rs7302809,-0.024  
12,139.386,rs10444502,-0.017  
12,139.462,rs2393333,-0.018  
12,139.505,rs4247308,-0.019  
12,139.605,rs7295696,-0.021  
12,139.719,rs10638,-0.014  
12,139.805,rs8239,-0.022  
12,139.841,rs11068807,-0.023  
12,139.850,rs7957463,-0.023  
12,139.979,rs10466937,-0.024  
12,140.330,rs5711113,-0.038  
12,140.368,rs12316703,-0.041  
12,140.407,rs1503767,-0.034  
12,140.410,rs11613092,-0.034  
12,140.413,rs7299095,-0.034  
12,140.423,rs10850973,-0.036  
12,140.484,rs10850993,-0.048  
12,140.499,rs1520782,-0.048  
12,140.511,rs1879401,-0.048  
12,140.572,rs7958091,-0.051  
12,140.595,rs10851011,-0.052  
12,140.630,rs2730751,-0.056  
12,140.674,rs716330,-0.065  
12,140.713,rs2698089,-0.055  
12,140.723,rs1948694,-0.052  
12,140.738,rs1534618,-0.051  
12,140.786,rs2204498,-0.060  
12,140.827,rs4767750,-0.055  
12,140.851,rs1405050,-0.049  
12,140.909,rs10774484,-0.055  
12,140.943,rs11064669,-0.033  
12,140.944,rs11064670,-0.037  
12,140.948,rs6490237,-0.029  
12,140.955,rs4767788,-0.025  
12,140.956,rs11064681,-0.024  
12,140.961,rs7134341,-0.024  
12,140.999,rs6490244,-0.021  
12,141.011,rs7294866,-0.017  
12,141.019,rs2555296,-0.016  
12,141.024,rs2555298,-0.015  
12,141.042,rs2555283,-0.016  
12,141.048,rs2727671,-0.016  
12,141.055,rs7296226,-0.015

12,141.066,rs2555253,-0.020  
12,141.083,rs2727733,-0.018  
12,141.096,rs3999618,-0.016  
12,141.108,rs7977005,-0.026  
12,141.131,rs4453294,-0.041  
12,141.135,rs4465416,-0.040  
12,141.154,rs2519543,-0.033  
12,141.161,rs708881,-0.031  
12,141.173,rs812512,-0.027  
12,141.177,rs2711746,-0.026  
12,141.182,rs11064838,-0.025  
12,141.256,rs4766950,-0.012  
12,141.261,rs11064935,-0.012  
12,141.292,rs2393569,-0.016  
12,141.324,rs11065014,-0.014  
12,141.344,rs3932409,-0.015  
12,141.399,rs2522137,-0.016  
12,141.418,rs206956,-0.021  
12,141.442,rs580016,-0.026  
12,141.448,rs3742049,-0.025  
12,141.473,rs7973823,-0.020  
12,141.495,rs11065208,-0.021  
12,141.500,rs7976497,-0.021  
12,141.546,rs11065299,-0.025  
12,141.577,rs10774579,-0.028  
12,141.593,rs2708081,-0.028  
12,141.597,rs10849832,-0.027  
12,141.637,rs1718119,-0.018  
12,141.648,rs1169727,-0.016  
12,141.660,rs2686346,-0.015  
12,141.661,rs7314454,-0.016  
12,141.665,rs11615578,-0.016  
12,141.668,rs11609701,-0.016  
12,141.677,rs2942067,-0.020  
12,141.696,rs7979163,-0.030  
12,141.703,rs7296507,-0.034  
12,141.725,rs7955747,-0.035  
12,141.731,rs7313015,-0.033  
12,141.799,rs10840615,-0.010  
12,141.801,rs11043196,-0.010  
12,141.814,rs1795964,-0.009  
12,141.831,rs7137218,-0.008  
12,141.836,rs7961894,-0.008  
12,141.899,rs11611988,-0.006  
12,141.945,rs4758695,-0.000  
12,141.993,rs7979863,-0.001  
12,142.015,rs10847446,-0.001  
12,142.406,rs12255,-0.000  
12,142.576,rs7953894,-0.000  
12,143.627,rs10846489,-0.000  
12,143.803,rs10773007,-0.000  
12,145.413,rs4930730,-0.001  
12,145.455,rs7960854,-0.005  
12,145.470,rs7315108,-0.005  
12,145.612,rs10744163,-0.004  
12,146.246,rs825476,-0.009  
12,146.534,rs1027569,-0.011  
12,146.548,rs4765078,-0.011  
12,146.581,rs4635174,-0.011  
12,146.785,rs4514520,-0.012  
12,146.834,rs4765477,-0.005

12,146.860,rs10846635,-0.003  
12,147.182,rs2272368,-0.003  
12,147.288,rs2271139,-0.003  
12,147.311,rs1268892,-0.003  
12,147.381,rs7953329,-0.001  
12,147.429,rs881290,-0.000  
12,147.464,rs2293514,-0.000  
12,147.529,rs1702339,-0.000  
12,147.660,rs1812730,0.000  
12,147.831,rs3759106,0.000  
12,147.843,rs1110904,0.001  
12,147.915,rs837948,0.002  
12,147.922,rs701039,0.002  
12,147.936,rs837492,0.002  
12,147.946,rs837466,0.002  
12,148.196,rs837493,0.001  
12,148.254,rs11057704,0.001  
12,148.255,rs10773097,0.001  
12,148.265,rs937341,0.001  
12,148.268,rs12308345,0.001  
12,148.323,rs701073,0.001  
12,148.342,rs11057712,-0.000  
12,148.563,rs701090,0.000  
12,148.648,rs838930,0.000  
12,148.656,rs838925,0.000  
12,148.765,rs838916,0.000  
12,148.787,rs838878,-0.000  
12,148.836,rs10773105,0.000  
12,148.857,rs838900,-0.000  
12,148.906,rs7967521,0.001  
12,148.907,rs12581963,0.001  
12,148.914,rs4765622,0.001  
12,148.946,rs11057864,0.002  
12,149.051,rs4307802,0.006  
12,149.147,rs10744185,0.014  
12,149.151,rs10846782,0.014  
12,149.155,rs4447263,0.014  
12,149.192,rs7350634,0.011  
12,149.224,rs12427062,0.008  
12,149.301,rs11613364,0.009  
12,149.480,rs7307700,0.009  
12,149.558,rs2297476,0.011  
12,149.615,rs10846838,0.012  
12,149.743,rs4765028,0.006  
12,149.780,rs4765029,0.004  
12,149.838,rs326363,0.002  
12,149.845,rs7300278,0.002  
12,149.942,rs748548,0.001  
12,150.182,rs323848,0.000  
12,150.236,rs161714,0.005  
12,150.260,rs422931,0.004  
12,150.271,rs440944,0.004  
12,150.279,rs724346,0.004  
12,150.364,rs1984673,0.000  
12,150.440,rs10846894,-0.000  
12,150.497,rs12578940,-0.001  
12,150.643,rs7956534,-0.009  
12,150.784,rs736438,-0.014  
12,151.016,rs10492032,-0.022  
12,151.771,rs10846980,-0.056  
12,151.885,rs1859943,-0.060

12,151.929,rs729632,-0.053  
12,151.982,rs7307536,-0.056  
12,152.036,rs2345782,-0.053  
12,152.088,rs150917,-0.055  
12,152.232,rs7960305,-0.058  
12,152.265,rs11058406,-0.054  
12,152.268,rs10847023,-0.054  
12,152.279,rs225563,-0.054  
12,152.318,rs225472,-0.049  
12,152.326,rs225475,-0.042  
12,152.333,rs2346115,-0.036  
12,152.373,rs12316769,-0.023  
12,152.440,rs11058439,-0.018  
12,152.481,rs225495,-0.019  
12,152.669,rs12821335,-0.030  
12,152.711,rs11058487,-0.032  
12,152.816,rs2881341,-0.037  
12,152.924,rs2191174,-0.037  
12,153.299,rs1160243,-0.038  
12,153.523,rs4765344,-0.039  
12,153.873,rs2347013,-0.018  
12,154.162,rs7296549,-0.003  
12,154.239,rs12309343,-0.004  
12,154.528,rs975162,-0.006  
12,154.540,rs10773298,-0.006  
12,154.613,rs10773304,-0.008  
12,154.633,rs2058290,-0.008  
12,154.896,rs4765428,-0.006  
12,155.075,rs4765449,-0.001  
12,155.124,rs1194050,-0.001  
12,155.144,rs7969727,-0.001  
12,155.272,rs11058803,-0.002  
12,155.375,rs6489132,-0.002  
12,155.528,rs2001789,-0.000  
12,155.561,rs1882151,-0.001  
12,155.829,rs2078322,0.001  
12,156.077,rs2605469,0.003  
12,156.454,rs2732494,0.000  
12,156.474,rs1990736,0.000  
12,156.529,rs11058920,0.001  
12,156.571,rs1154664,0.001  
12,156.591,rs12425988,0.005  
12,156.630,rs6489145,0.007  
12,156.656,rs12299180,0.008  
12,156.662,rs7308066,0.007  
12,156.708,rs11058949,0.007  
12,157.409,rs2712549,0.006  
12,157.761,rs4765134,0.004  
12,157.788,rs12811986,0.004  
12,158.132,rs3851661,0.002  
12,158.226,rs12422389,0.006  
12,158.306,rs7966946,0.004  
12,158.461,rs906737,0.002  
12,158.866,rs10847328,0.001  
12,159.106,rs7967228,0.001  
12,159.184,rs12821339,0.000  
12,159.220,rs1875949,0.001  
12,159.401,rs1910780,0.001  
12,159.426,rs7313873,0.002  
12,159.499,rs1485862,-0.000  
12,159.512,rs3847768,0.000

12,159.516,rs1879390,0.000  
12,159.517,rs4760998,0.000  
12,159.536,rs10744311,0.000  
12,159.546,rs10847350,0.000  
12,159.680,rs2046480,-0.000  
12,159.876,rs345643,-0.000  
12,159.887,rs4760974,-0.000  
12,159.965,rs10444467,-0.003  
12,159.982,rs4760979,-0.004  
12,160.019,rs4760980,-0.005  
12,160.323,rs1873911,-0.014  
12,160.356,rs12231982,-0.015  
12,160.452,rs1910311,-0.024  
12,160.546,rs1490889,-0.034  
12,160.828,rs4761009,-0.032  
12,160.946,rs7312587,-0.037  
12,161.009,rs7962827,-0.040  
12,161.435,rs10744327,-0.024  
12,161.664,rs1488166,-0.009  
12,161.700,rs2250786,-0.008  
12,161.712,rs10847502,-0.010  
12,161.730,rs11059460,-0.006  
12,161.838,rs6489236,-0.006  
12,161.844,rs7487570,-0.006  
12,161.941,rs10773484,-0.006  
12,162.048,rs9795921,-0.005  
12,162.208,rs9669797,-0.002  
12,162.221,rs10847534,-0.002  
12,162.363,rs7962380,-0.001  
12,162.413,rs11830497,-0.001  
12,162.431,rs7139294,-0.004  
12,162.469,rs4882703,-0.002  
12,162.809,rs11059595,0.000  
12,162.935,rs7135277,0.001  
12,162.984,rs1193373,0.001  
12,163.061,rs11059618,0.000  
12,163.137,rs1872536,0.000  
12,163.240,rs1872541,0.000  
12,163.309,rs4882735,-0.000  
12,163.352,rs1193363,-0.002  
12,163.560,rs10847601,-0.004  
12,163.614,rs4882748,-0.006  
12,163.716,rs4882752,-0.010  
12,163.871,rs1683721,-0.014  
12,163.993,rs885186,-0.030  
12,164.000,rs11059688,-0.030  
12,164.059,rs4882764,-0.015  
12,164.253,rs1713614,-0.020  
12,164.283,rs10847627,-0.021  
12,164.407,rs7310152,-0.029  
12,164.522,rs10161384,-0.031  
12,164.583,rs11615025,-0.033  
12,164.720,rs1379782,-0.050  
12,164.736,rs4882789,-0.041  
12,164.757,rs1489418,-0.042  
12,164.810,rs10847654,-0.043  
12,164.913,rs1552580,-0.038  
12,165.064,rs12809589,-0.051  
12,165.177,rs7960753,-0.063  
12,165.309,rs7968958,-0.104  
12,165.363,rs1552574,-0.122

12,165.372,rs4760566,-0.125  
12,165.508,rs7967621,-0.090  
12,165.565,rs7978366,-0.083  
12,165.591,rs10744387,-0.080  
12,165.662,rs4760578,-0.031  
12,165.663,rs1552337,-0.031  
12,165.823,rs10847697,-0.022  
12,165.941,rs10744391,-0.021  
12,165.971,rs7970478,-0.020  
12,166.046,rs11059985,-0.017  
12,166.158,rs7300146,-0.014  
12,166.247,rs12579680,-0.011  
12,166.352,rs11060036,-0.011  
12,166.441,rs651352,-0.011  
12,166.481,rs6486749,-0.010  
12,166.572,rs543533,-0.008  
12,166.623,rs9651791,-0.002  
12,166.627,rs10773589,-0.002  
12,166.679,rs10847746,-0.001  
12,166.699,rs588649,-0.001  
12,166.704,rs10773593,-0.001  
12,166.791,rs875729,-0.009  
12,166.816,rs7303978,-0.011  
12,166.870,rs1386212,-0.011  
12,166.928,rs10847773,-0.010  
12,166.956,rs12423558,-0.010  
12,166.993,rs7972301,-0.009  
12,167.004,rs10744400,-0.009  
12,167.022,rs10847780,-0.008  
12,167.074,rs4964869,-0.006  
12,167.143,rs11060179,-0.004  
12,167.186,rs12422603,-0.003  
12,167.267,rs11613890,-0.004  
12,167.297,rs10847798,-0.005  
12,167.324,rs10773613,-0.005  
12,167.381,rs2306517,-0.006  
12,167.418,rs10773623,-0.007  
12,167.574,rs7302528,-0.005  
12,167.614,rs1568474,-0.005  
12,167.724,rs3850004,-0.004  
12,167.728,rs10847832,-0.004  
12,167.823,rs1871898,-0.000  
12,167.831,rs11060280,-0.002  
12,167.848,rs11060288,-0.002  
12,167.921,rs11060321,-0.001  
12,167.926,rs2398459,-0.001  
12,167.945,rs11060331,-0.001  
12,167.991,rs6486467,-0.000  
12,168.036,rs6486470,-0.000  
12,168.040,rs12424570,-0.000  
12,168.041,rs12809344,-0.000  
12,168.050,rs7959926,-0.000  
12,168.052,rs10773664,-0.000  
12,168.155,rs11060378,-0.004  
12,168.196,rs1484009,-0.006  
12,168.206,rs2398463,-0.006  
12,168.215,rs4759955,-0.006  
12,168.256,rs2131257,-0.007  
12,168.269,rs6486483,-0.007  
12,168.366,rs12298735,-0.011  
12,168.410,rs7967283,-0.005



12,168.440,rs7956182,-0.004  
12,168.453,rs7315885,-0.004  
12,168.507,rs10773689,-0.000  
12,168.547,rs265603,-0.001  
12,168.625,rs1451904,-0.005  
12,168.708,rs6486497,-0.013  
12,168.792,rs4468386,-0.026  
12,168.871,rs873029,-0.052  
12,168.874,rs10847946,-0.054  
12,168.884,rs7316914,-0.059  
12,168.902,rs12317107,-0.065  
12,168.983,rs764902,-0.096  
12,169.013,rs7957137,-0.068  
12,169.087,rs12811810,-0.072  
12,169.128,rs10744436,-0.068  
12,169.192,rs478347,-0.057  
12,169.342,rs7955834,-0.053  
12,169.357,rs667393,-0.053  
12,169.445,rs12307812,-0.052  
12,169.452,rs1617236,-0.052  
12,169.458,rs1696435,-0.053  
12,169.518,rs628195,-0.061  
12,169.583,rs826911,-0.065  
12,169.600,rs10847997,-0.066  
12,169.622,rs11060699,-0.059  
12,169.632,rs7137346,-0.046  
12,169.647,rs2292051,-0.049  
12,169.669,rs11060727,-0.055  
12,169.680,rs11060738,-0.055  
12,169.696,rs4760083,-0.054  
12,169.697,rs11614438,-0.054  
12,169.706,rs3741568,-0.056  
12,169.711,rs1566672,-0.059  
12,169.713,rs1979882,-0.062  
12,169.730,rs937534,-0.074  
12,169.764,rs7304152,-0.057  
12,169.801,rs903951,-0.056  
12,169.823,rs428715,-0.055  
12,169.825,rs536745,-0.056  
12,169.858,rs10773760,-0.066  
12,169.862,rs1798296,-0.067  
12,169.945,rs4759454,-0.092  
12,169.967,rs1106042,-0.078  
12,169.991,rs11835358,-0.063  
12,170.006,rs10848092,-0.057  
12,170.044,rs11060872,-0.064  
12,170.069,rs7966010,-0.048  
12,170.075,rs11611873,-0.045  
12,170.100,rs10773783,-0.034  
12,170.118,rs10161112,-0.029  
12,170.133,rs1983313,-0.024  
12,170.151,rs2398513,-0.018  
12,170.172,rs9668242,-0.021  
12,170.179,rs883766,-0.022  
12,170.185,rs4759709,-0.019  
12,170.197,rs1356083,-0.015  
12,170.233,rs12580573,-0.012  
12,170.244,rs12578145,-0.010  
12,170.245,rs12809631,-0.010  
12,170.255,rs11061001,-0.010  
12,170.258,rs10773796,-0.009

12,170.310,rs10848159,-0.005  
12,170.324,rs1487602,-0.004  
12,170.362,rs7968615,-0.004  
12,170.401,rs10773810,-0.011  
12,170.430,rs2398526,-0.023  
12,170.459,rs2695863,-0.026  
12,170.488,rs7138800,-0.017  
12,170.491,rs1195569,-0.015  
12,170.493,rs2695934,-0.017  
12,170.636,rs10848218,-0.000  
12,170.657,rs872396,-0.001  
12,170.736,rs1405904,-0.000  
12,170.752,rs7136250,-0.002  
12,170.767,rs7131934,-0.001  
12,170.780,rs6486617,-0.000  
12,170.787,rs819118,-0.000  
12,170.789,rs843899,-0.000  
12,170.858,rs12302321,-0.001  
12,170.872,rs1195906,-0.001  
12,170.919,rs7301892,-0.003  
12,171.051,rs4075564,-0.002  
12,171.080,rs7300298,-0.000  
12,171.121,rs10773862,-0.000  
12,171.142,rs3890823,-0.001  
12,171.164,rs7314138,-0.002  
12,171.189,rs4237828,-0.002  
12,171.214,rs3934768,-0.001  
12,171.221,rs12819145,-0.001  
12,171.254,rs7398148,-0.001  
12,171.344,rs11061539,-0.002  
12,171.356,rs11061545,-0.002  
12,171.502,rs6598159,-0.004  
12,171.511,rs12825202,-0.004  
12,171.559,rs10794465,-0.003  
12,171.561,rs7294672,-0.003  
12,171.567,rs10902531,-0.003  
12,171.584,rs10794472,-0.004  
12,171.630,rs11611690,-0.004  
12,171.719,rs11246786,-0.003  
12,171.749,rs9971764,-0.002  
12,171.784,rs6598156,-0.002  
12,171.857,rs9634312,-0.001  
12,171.867,rs4964933,-0.001  
12,172.120,rs10902488,0.000  
12,172.251,rs11831111,-0.000  
12,172.310,rs7961948,-0.000  
12,172.726,rs2323964,-0.017  
12,172.744,rs11146962,-0.024  
12,172.785,rs7296889,-0.016  
12,172.803,rs12316422,-0.016  
12,172.915,rs11146953,-0.012  
12,172.930,rs7294615,-0.011  
12,172.953,rs2323973,-0.011  
12,173.158,rs7136989,-0.012  
12,173.241,rs1564647,-0.013  
12,173.340,rs7970906,-0.015  
12,173.397,rs11147178,-0.013  
12,173.625,rs11147249,-0.007  
12,173.657,rs2292029,-0.007  
12,173.694,rs7313869,-0.008  
13,0.093,rs9285110,0.667

13,0.127,rs4383003,0.666  
13,0.182,rs7323769,0.666  
13,0.468,rs17080439,0.680  
13,0.572,rs7995321,0.678  
13,0.728,rs2225275,0.699  
13,0.797,rs4409941,0.708  
13,0.946,rs12018394,0.743  
13,1.330,rs9552183,0.792  
13,1.461,rs3936015,0.797  
13,1.661,rs12861202,0.794  
13,1.838,rs7327476,0.790  
13,2.004,rs4770052,0.763  
13,2.778,rs9506528,0.652  
13,5.574,rs500755,0.610  
13,5.685,rs945664,0.629  
13,5.978,rs1345067,0.683  
13,6.337,rs9509528,0.706  
13,6.338,rs11843734,0.706  
13,6.381,rs7991284,0.714  
13,6.387,rs4770115,0.682  
13,6.388,rs9552360,0.726  
13,6.518,rs9316157,0.684  
13,6.520,rs7331685,0.685  
13,6.601,rs9506634,0.710  
13,6.669,rs2152244,0.637  
13,6.895,rs12853474,0.685  
13,6.900,rs17356983,0.687  
13,6.982,rs9580094,0.721  
13,7.455,rs2488803,0.817  
13,7.525,rs1323890,0.722  
13,7.574,rs264724,0.701  
13,7.620,rs1208333,0.682  
13,7.643,rs263931,0.685  
13,7.717,rs10047718,0.694  
13,7.810,rs596837,0.758  
13,7.814,rs1886859,0.759  
13,7.859,rs480910,0.806  
13,7.914,rs1326865,0.778  
13,7.929,rs6490671,0.776  
13,7.945,rs1886510,0.845  
13,7.948,rs17072071,0.862  
13,7.951,rs9509870,0.876  
13,7.960,rs7994271,0.841  
13,7.966,rs17072214,0.848  
13,7.997,rs9509881,0.821  
13,8.031,rs7995502,0.817  
13,8.066,rs17072780,0.818  
13,8.124,rs9509908,0.828  
13,8.169,rs17073293,0.860  
13,8.191,rs9316605,0.875  
13,8.254,rs3129640,0.898  
13,8.339,rs3129678,0.864  
13,8.357,rs3129591,0.867  
13,8.365,rs1924206,0.804  
13,8.367,rs3129595,0.843  
13,8.370,rs1924208,0.841  
13,8.478,rs7981623,0.693  
13,8.497,rs8000805,0.604  
13,8.500,rs9509982,0.599  
13,8.511,rs9509983,0.718  
13,8.525,rs4457852,0.747

13,8.541,rs9506777,0.759  
13,8.565,rs12859446,0.756  
13,8.578,rs3945860,0.753  
13,8.616,rs7332465,0.736  
13,8.668,rs9316766,0.716  
13,8.670,rs7139808,0.716  
13,8.688,rs7318731,0.717  
13,8.690,rs9510002,0.700  
13,8.693,rs7982293,0.663  
13,8.697,rs9316801,0.642  
13,8.703,rs6490700,0.606  
13,8.704,rs11620082,0.591  
13,8.706,rs9550817,0.568  
13,8.707,rs7983232,0.559  
13,8.711,rs9578443,0.555  
13,8.726,rs1323165,0.528  
13,8.736,rs9552617,0.539  
13,8.740,rs985288,0.542  
13,8.743,rs7329697,0.543  
13,8.744,rs2320968,0.543  
13,8.750,rs4770252,0.531  
13,8.752,rs2503339,0.505  
13,8.754,rs912325,0.497  
13,8.763,rs951904,0.455  
13,8.766,rs4770258,0.455  
13,8.776,rs2476513,0.467  
13,8.779,rs7327720,0.475  
13,8.782,rs7999201,0.525  
13,8.784,rs9510073,0.526  
13,8.800,rs9506831,0.532  
13,8.814,rs464457,0.543  
13,8.844,rs9510129,0.467  
13,8.852,rs9552636,0.451  
13,8.899,rs2992022,0.425  
13,8.911,rs9317008,0.385  
13,8.939,rs17423874,0.368  
13,9.020,rs431103,0.329  
13,9.055,rs2162250,0.332  
13,9.081,rs9510308,0.333  
13,9.171,rs3864963,0.323  
13,9.417,rs3904322,0.331  
13,9.565,rs1330919,0.339  
13,9.771,rs4366580,0.339  
13,9.845,rs7986449,0.336  
13,10.000,rs4770334,0.347  
13,10.400,rs7999417,0.331  
13,10.575,rs7331424,0.352  
13,10.690,rs4770370,0.338  
13,10.714,rs9317418,0.335  
13,10.732,rs1170697,0.332  
13,10.813,rs6490774,0.342  
13,10.866,rs1537969,0.348  
13,11.016,rs9552822,0.301  
13,11.197,rs9317500,0.299  
13,11.223,rs4769241,0.299  
13,11.254,rs9510597,0.302  
13,11.319,rs3764066,0.324  
13,11.320,rs9507041,0.325  
13,11.339,rs597425,0.341  
13,11.384,rs749399,0.374  
13,11.396,rs9580563,0.374

13,11.514,rs7323053,0.371  
13,11.518,rs1359978,0.371  
13,11.530,rs9578562,0.358  
13,11.558,rs7995077,0.328  
13,11.651,rs4769253,0.302  
13,11.690,rs475992,0.332  
13,11.775,rs4770433,0.325  
13,11.953,rs1008812,0.305  
13,12.053,rs4083575,0.286  
13,12.127,rs17070695,0.272  
13,12.177,rs2274928,0.262  
13,12.188,rs7331053,0.262  
13,12.237,rs9317744,0.260  
13,12.237,rs10507331,0.260  
13,12.417,rs9510774,0.242  
13,12.639,rs9553022,0.233  
13,12.736,rs8001054,0.265  
13,12.745,rs913561,0.293  
13,13.181,rs9318064,0.249  
13,13.280,rs7325694,0.252  
13,13.422,rs9510934,0.178  
13,13.547,rs1570885,0.174  
13,13.557,rs2765114,0.174  
13,13.567,rs2765122,0.174  
13,13.570,rs1886796,0.176  
13,13.595,rs2250115,0.175  
13,13.678,rs4770541,0.170  
13,13.768,rs9551041,0.171  
13,13.772,rs9553146,0.172  
13,13.777,rs4770557,0.172  
13,13.798,rs9507223,0.179  
13,13.877,rs1409020,0.162  
13,13.890,rs7333781,0.158  
13,13.937,rs7326323,0.147  
13,13.939,rs9553164,0.126  
13,13.994,rs7318560,0.108  
13,14.032,rs1325662,0.095  
13,14.077,rs4770601,0.084  
13,14.112,rs9318347,0.082  
13,14.152,rs7336618,0.081  
13,14.168,rs1220582,0.074  
13,14.168,rs1220583,0.074  
13,14.199,rs1028695,0.074  
13,14.251,rs9318387,0.055  
13,14.254,rs1220569,0.054  
13,14.331,rs7326788,0.038  
13,14.385,rs1220597,0.029  
13,14.472,rs1891105,0.025  
13,14.483,rs7986973,0.024  
13,14.547,rs947230,0.019  
13,14.558,rs3803218,0.027  
13,14.930,rs9511259,0.030  
13,15.005,rs2862901,0.030  
13,15.092,rs7985561,0.028  
13,15.445,rs8000533,0.026  
13,15.502,rs1998834,0.024  
13,15.525,rs7993583,0.025  
13,15.608,rs7330536,0.022  
13,15.720,rs2722,0.024  
13,15.725,rs9318731,0.024  
13,15.838,rs12585211,0.022

13,15.843,rs12019525,0.022  
13,16.260,rs9553464,0.012  
13,16.306,rs12585556,0.011  
13,16.374,rs2497600,0.015  
13,16.397,rs4770771,0.016  
13,16.438,rs2497615,0.018  
13,16.449,rs9511601,0.020  
13,16.460,rs3002182,0.021  
13,16.557,rs7325885,0.032  
13,16.565,rs9581282,0.032  
13,16.587,rs3622,0.040  
13,16.602,rs9578831,0.045  
13,16.709,rs17082070,0.043  
13,16.750,rs12871898,0.043  
13,16.866,rs7991984,0.053  
13,16.875,rs11841180,0.070  
13,16.882,rs12867463,0.070  
13,16.894,rs17725018,0.063  
13,16.980,rs7320729,0.054  
13,17.228,rs1535564,0.052  
13,17.245,rs10492428,0.052  
13,17.246,rs3117864,0.052  
13,17.265,rs3132361,0.060  
13,17.281,rs9634423,0.060  
13,17.285,rs9511907,0.061  
13,17.923,rs769118,0.063  
13,17.953,rs7358822,0.065  
13,17.983,rs306416,0.071  
13,18.012,rs1041052,0.070  
13,18.021,rs1359311,0.066  
13,18.030,rs7333000,0.052  
13,18.034,rs17082912,0.046  
13,18.103,rs1048787,0.039  
13,18.104,rs9551232,0.038  
13,18.119,rs9553712,0.028  
13,18.124,rs17083075,0.028  
13,18.162,rs2419887,0.024  
13,18.172,rs1886489,0.024  
13,18.283,rs9512144,0.027  
13,18.292,rs530327,0.027  
13,18.369,rs10871234,0.023  
13,18.580,rs17084132,0.023  
13,18.601,rs1610367,0.023  
13,18.623,rs6491129,0.022  
13,18.623,rs7982250,0.022  
13,18.625,rs924483,0.021  
13,18.648,rs555722,0.018  
13,18.651,rs4770993,0.018  
13,19.277,rs1018123,0.047  
13,19.497,rs943724,0.044  
13,19.537,rs932734,0.027  
13,19.538,rs7998006,0.025  
13,19.619,rs7321548,0.018  
13,19.733,rs9285350,0.028  
13,19.812,rs7333854,0.034  
13,19.853,rs2182880,0.037  
13,19.910,rs17084678,0.042  
13,19.925,rs1108755,0.043  
13,19.937,rs2149131,0.044  
13,19.973,rs9553904,0.043  
13,20.123,rs7338990,0.036

13,20.175,rs7983414,0.033  
13,20.225,rs9581775,0.029  
13,20.251,rs1014472,0.031  
13,20.256,rs2149220,0.031  
13,20.287,rs9551341,0.031  
13,20.302,rs4372560,0.026  
13,20.324,rs9512448,0.011  
13,20.340,rs1576168,0.007  
13,20.392,rs9551343,0.003  
13,20.429,rs17084974,0.001  
13,20.436,rs12585310,0.001  
13,20.499,rs12873430,-0.000  
13,20.528,rs9512476,-0.000  
13,20.638,rs7337170,-0.004  
13,20.708,rs7981663,-0.003  
13,20.790,rs9512519,-0.001  
13,21.208,rs7984685,-0.000  
13,21.479,rs12873548,0.001  
13,21.770,rs1759857,0.006  
13,21.811,rs2760902,0.010  
13,21.816,rs9512673,0.010  
13,21.890,rs2892059,0.006  
13,21.926,rs17085657,0.005  
13,21.934,rs9512713,0.005  
13,22.068,rs9512759,0.004  
13,22.192,rs9554143,0.006  
13,22.242,rs11618682,0.008  
13,22.242,rs9512843,0.008  
13,22.318,rs1326384,0.011  
13,22.341,rs7984165,0.009  
13,22.402,rs1970616,0.009  
13,22.437,rs9581919,0.008  
13,22.467,rs1778792,0.013  
13,22.525,rs2387104,0.022  
13,22.660,rs4614573,0.019  
13,22.696,rs3829382,0.019  
13,22.727,rs9512980,0.019  
13,22.776,rs1933437,0.018  
13,22.912,rs13378207,0.015  
13,23.157,rs9319424,0.010  
13,23.235,rs3794399,0.000  
13,23.236,rs2296189,-0.001  
13,23.339,rs9554325,-0.017  
13,23.380,rs6491283,-0.019  
13,23.485,rs622227,-0.032  
13,23.592,rs9550377,-0.033  
13,23.623,rs7320503,-0.033  
13,23.648,rs17086813,-0.025  
13,23.671,rs7321093,-0.018  
13,23.713,rs7997858,-0.015  
13,23.722,rs1980747,-0.015  
13,23.766,rs17086947,-0.015  
13,23.798,rs8002632,-0.015  
13,23.857,rs12867747,-0.022  
13,23.983,rs1305115,-0.016  
13,24.079,rs6490331,-0.019  
13,24.190,rs7992387,-0.019  
13,24.322,rs327118,-0.020  
13,24.554,rs1885538,-0.020  
13,24.677,rs17650122,-0.021  
13,24.716,rs9551592,-0.021

13,25.189,rs7332351,-0.028  
13,25.239,rs1927836,-0.030  
13,25.397,rs7997835,-0.033  
13,25.407,rs11617962,-0.033  
13,25.844,rs2992385,-0.034  
13,25.908,rs4341627,-0.034  
13,26.037,rs9508345,-0.032  
13,26.054,rs12874453,-0.032  
13,26.256,rs9508405,-0.057  
13,26.423,rs7334388,-0.060  
13,26.619,rs7984403,-0.060  
13,26.623,rs9551682,-0.061  
13,26.648,rs4379923,-0.081  
13,26.685,rs1986785,-0.117  
13,26.763,rs2388084,-0.110  
13,26.807,rs4769753,-0.096  
13,26.845,rs7324267,-0.108  
13,26.873,rs7329421,-0.121  
13,27.056,rs1571786,-0.188  
13,27.084,rs9579398,-0.189  
13,27.290,rs9551705,-0.219  
13,28.006,rs7321345,-0.238  
13,28.028,rs17631397,-0.239  
13,28.052,rs2388238,-0.240  
13,28.078,rs1547162,-0.216  
13,28.236,rs7994485,-0.237  
13,28.268,rs9579518,-0.239  
13,28.290,rs626014,-0.240  
13,28.297,rs4769026,-0.241  
13,28.305,rs12427942,-0.239  
13,28.346,rs504508,-0.224  
13,28.350,rs656962,-0.222  
13,28.375,rs2038936,-0.246  
13,28.396,rs1409504,-0.236  
13,28.413,rs750683,-0.228  
13,28.418,rs913905,-0.223  
13,28.466,rs12583235,-0.218  
13,28.472,rs2892537,-0.212  
13,28.491,rs10478,-0.193  
13,28.500,rs11617724,-0.190  
13,28.539,rs202093,-0.177  
13,28.560,rs17633078,-0.181  
13,28.623,rs202080,-0.193  
13,28.633,rs9508701,-0.196  
13,28.709,rs9508716,-0.208  
13,28.732,rs7986129,-0.196  
13,28.759,rs9550565,-0.176  
13,28.775,rs7320510,-0.163  
13,28.832,rs1412125,-0.156  
13,28.848,rs1467719,-0.160  
13,28.851,rs9550568,-0.161  
13,28.870,rs12431309,-0.165  
13,28.881,rs9508766,-0.162  
13,28.911,rs9506325,-0.165  
13,28.939,rs9508795,-0.149  
13,28.948,rs9508798,-0.148  
13,28.949,rs1570613,-0.148  
13,28.950,rs1331697,-0.141  
13,28.953,rs9508801,-0.114  
13,29.066,rs6490474,-0.125  
13,29.128,rs9315027,-0.114



13,29.138,rs7995384,-0.113  
13,29.238,rs9579654,-0.110  
13,29.303,rs11843688,-0.114  
13,29.327,rs9550354,-0.118  
13,29.365,rs12876893,-0.120  
13,29.439,rs2313742,-0.104  
13,29.465,rs727120,-0.101  
13,29.526,rs4943311,-0.099  
13,29.554,rs6563504,-0.093  
13,29.668,rs1331847,-0.104  
13,29.806,rs2313000,-0.110  
13,29.830,rs9596054,-0.115  
13,29.919,rs4943074,-0.193  
13,29.954,rs9591599,-0.200  
13,30.001,rs9527530,-0.227  
13,30.038,rs912294,-0.251  
13,30.206,rs9598993,-0.268  
13,30.270,rs7981424,-0.240  
13,30.501,rs17631074,-0.153  
13,30.599,rs17075938,-0.121  
13,30.612,rs9546363,-0.116  
13,30.672,rs12100418,-0.112  
13,30.703,rs11841788,-0.100  
13,30.703,rs3915915,-0.100  
13,30.717,rs7321575,-0.106  
13,30.753,rs1410811,-0.111  
13,30.876,rs1613660,-0.111  
13,30.956,rs598700,-0.111  
13,31.115,rs277145,-0.135  
13,31.137,rs6563643,-0.132  
13,31.260,rs2181255,-0.101  
13,31.288,rs7139573,-0.097  
13,31.318,rs9549299,-0.090  
13,31.324,rs524566,-0.090  
13,31.401,rs6561013,-0.087  
13,31.415,rs426307,-0.092  
13,31.431,rs365873,-0.107  
13,31.485,rs424118,-0.118  
13,31.524,rs9315155,-0.126  
13,31.556,rs396150,-0.132  
13,31.638,rs2520696,-0.153  
13,31.655,rs9525969,-0.157  
13,31.662,rs9595159,-0.158  
13,31.681,rs2806628,-0.132  
13,31.685,rs9567484,-0.134  
13,31.717,rs2078326,-0.150  
13,31.793,rs4942486,-0.156  
13,31.810,rs1207952,-0.157  
13,32.042,rs4942925,-0.109  
13,32.044,rs990324,-0.108  
13,32.085,rs2147356,-0.097  
13,32.088,rs3848090,-0.095  
13,32.119,rs743874,-0.087  
13,32.121,rs17643100,-0.103  
13,32.122,rs426049,-0.088  
13,32.122,rs378609,-0.088  
13,32.131,rs566528,-0.088  
13,32.138,rs398655,-0.089  
13,32.178,rs677332,-0.082  
13,32.422,rs797224,-0.088  
13,32.459,rs703232,-0.095

13,32.493,rs797190,-0.098  
13,32.494,rs9591586,-0.098  
13,32.518,rs2764624,-0.099  
13,32.633,rs9536928,-0.104  
13,32.895,rs9597332,-0.114  
13,32.957,rs7334982,-0.106  
13,33.200,rs7324034,-0.070  
13,33.236,rs7323357,-0.068  
13,33.321,rs11618678,-0.069  
13,33.354,rs7333539,-0.069  
13,33.409,rs2321480,-0.083  
13,33.454,rs4943138,-0.084  
13,33.529,rs9538624,-0.086  
13,33.675,rs1329667,-0.080  
13,33.796,rs1328667,-0.073  
13,33.895,rs1328660,-0.070  
13,33.904,rs581738,-0.069  
13,33.905,rs1328658,-0.069  
13,33.922,rs9570962,-0.074  
13,33.950,rs1832265,-0.081  
13,33.954,rs9528685,-0.081  
13,33.960,rs12584168,-0.081  
13,34.027,rs11839186,-0.084  
13,34.064,rs7992404,-0.090  
13,34.115,rs9528902,-0.102  
13,34.173,rs602078,-0.115  
13,34.211,rs9540648,-0.119  
13,34.265,rs9540823,-0.126  
13,34.328,rs5027696,-0.128  
13,34.370,rs2322115,-0.124  
13,34.409,rs913692,-0.151  
13,34.414,rs1998660,-0.154  
13,34.417,rs1410950,-0.156  
13,34.461,rs9599293,-0.170  
13,34.582,rs1876583,-0.227  
13,34.598,rs1876582,-0.234  
13,34.645,rs968352,-0.249  
13,34.645,rs968351,-0.249  
13,34.651,rs9542104,-0.277  
13,34.755,rs9599726,-0.279  
13,34.767,rs9599736,-0.279  
13,34.772,rs1323949,-0.279  
13,34.821,rs9572720,-0.283  
13,35.454,rs9544368,-0.363  
13,35.539,rs958793,-0.372  
13,35.724,rs2798338,-0.420  
13,35.779,rs410595,-0.438  
13,35.918,rs9545074,-0.483  
13,35.929,rs445435,-0.496  
13,35.955,rs9530931,-0.521  
13,35.987,rs4941815,-0.546  
13,36.104,rs9574622,-0.499  
13,36.165,rs10507431,-0.521  
13,36.216,rs1926466,-0.577  
13,36.233,rs12427459,-0.578  
13,36.265,rs2051090,-0.580  
13,36.276,rs10507437,-0.587  
13,36.315,rs11147593,-0.591  
13,36.337,rs1891673,-0.593  
13,36.384,rs9574960,-0.578  
13,36.421,rs9545925,-0.563

13,36.456,rs9531304,-0.561  
13,36.510,rs1170994,-0.495  
13,36.690,rs9531436,-0.586  
13,36.757,rs1556060,-0.605  
13,36.816,rs12861843,-0.616  
13,37.199,rs3736919,-0.577  
13,37.541,rs1517897,-0.628  
13,37.578,rs9315431,-0.631  
13,37.579,rs9315432,-0.632  
13,37.601,rs1517882,-0.644  
13,37.709,rs1517887,-0.656  
13,37.719,rs2759295,-0.613  
13,37.753,rs9566152,-0.602  
13,37.797,rs7323558,-0.540  
13,37.861,rs1407586,-0.455  
13,37.904,rs2025237,-0.420  
13,37.952,rs7991888,-0.322  
13,37.955,rs9603089,-0.319  
13,38.020,rs9547668,-0.246  
13,38.057,rs1328038,-0.221  
13,38.119,rs609418,-0.176  
13,38.162,rs3748305,-0.159  
13,38.162,rs678037,-0.159  
13,38.193,rs648206,-0.146  
13,39.008,rs9547750,-0.172  
13,39.103,rs6563522,-0.180  
13,39.164,rs1408234,-0.185  
13,39.322,rs10507452,-0.199  
13,39.359,rs6563528,-0.202  
13,39.430,rs7321497,-0.193  
13,39.521,rs9532064,-0.180  
13,39.536,rs17055893,-0.180  
13,39.675,rs6563562,-0.187  
13,39.781,rs7332871,-0.197  
13,39.807,rs1924304,-0.225  
13,39.869,rs2991010,-0.225  
13,39.921,rs9603254,-0.216  
13,39.944,rs11147670,-0.212  
13,39.974,rs9576354,-0.220  
13,40.040,rs612701,-0.244  
13,40.092,rs4144140,-0.248  
13,40.191,rs1337604,-0.291  
13,40.247,rs9576408,-0.319  
13,40.412,rs9548183,-0.334  
13,40.537,rs612572,-0.334  
13,40.545,rs683479,-0.334  
13,40.667,rs473755,-0.344  
13,40.697,rs1553301,-0.355  
13,40.725,rs658206,-0.392  
13,40.726,rs607574,-0.419  
13,41.080,rs9548413,-0.500  
13,41.164,rs2122211,-0.520  
13,41.183,rs990909,-0.514  
13,41.221,rs9603418,-0.499  
13,41.226,rs2442361,-0.510  
13,41.239,rs9566362,-0.524  
13,41.244,rs7335905,-0.519  
13,41.252,rs9594293,-0.514  
13,41.277,rs4943605,-0.545  
13,41.278,rs9576628,-0.547  
13,41.341,rs9548534,-0.634

13,41.379,rs11840412,-0.634  
13,41.394,rs9548568,-0.639  
13,42.228,rs9566412,-0.640  
13,42.315,rs9576762,-0.643  
13,43.068,rs9315678,-0.701  
13,43.098,rs1186468,-0.700  
13,43.208,rs17803662,-0.613  
13,43.240,rs641027,-0.592  
13,43.247,rs927924,-0.456  
13,43.267,rs13313352,-0.361  
13,43.272,rs11617562,-0.345  
13,43.272,rs7326616,-0.344  
13,43.290,rs2145805,-0.329  
13,43.307,rs8000689,-0.315  
13,43.330,rs2701853,-0.372  
13,43.343,rs2246612,-0.392  
13,43.376,rs2721052,-0.425  
13,43.406,rs2755209,-0.454  
13,43.465,rs17630266,-0.442  
13,43.653,rs2282022,-0.401  
13,43.667,rs7335572,-0.398  
13,43.715,rs4941999,-0.386  
13,44.053,rs488873,-0.319  
13,44.097,rs2026468,-0.309  
13,44.133,rs9532758,-0.316  
13,44.252,rs9525479,-0.364  
13,44.351,rs3783197,-0.387  
13,44.380,rs9562311,-0.368  
13,44.460,rs7999970,-0.314  
13,44.916,rs12585194,-0.279  
13,44.986,rs9525560,-0.288  
13,45.377,rs9525590,-0.321  
13,45.414,rs9533031,-0.324  
13,45.488,rs238349,-0.285  
13,45.503,rs9533044,-0.281  
13,45.562,rs9315903,-0.268  
13,45.629,rs7994365,-0.255  
13,45.796,rs386283,-0.247  
13,46.000,rs9594759,-0.236  
13,46.086,rs9315923,-0.243  
13,46.316,rs3742257,-0.241  
13,46.402,rs7994396,-0.251  
13,46.573,rs9533215,-0.273  
13,46.801,rs1535904,-0.259  
13,46.887,rs1324418,-0.277  
13,46.997,rs9533297,-0.301  
13,47.034,rs12863816,-0.299  
13,47.035,rs9567068,-0.299  
13,47.123,rs9525716,-0.332  
13,47.165,rs1886152,-0.331  
13,47.185,rs11147895,-0.328  
13,47.320,rs6561104,-0.307  
13,47.495,rs9533399,-0.292  
13,47.501,rs2589307,-0.293  
13,47.563,rs1156026,-0.286  
13,47.571,rs1008913,-0.283  
13,47.601,rs2589315,-0.254  
13,47.642,rs7323280,-0.218  
13,47.761,rs9285151,-0.186  
13,47.827,rs730210,-0.173  
13,47.937,rs12857536,-0.168

13,47.959,rs745334,-0.176  
13,48.011,rs9533457,-0.204  
13,48.116,rs7329258,-0.209  
13,48.169,rs7994773,-0.215  
13,48.363,rs7336352,-0.238  
13,48.474,rs9533567,-0.238  
13,48.485,rs17539034,-0.266  
13,48.486,rs1329294,-0.295  
13,48.718,rs7992315,-0.327  
13,48.762,rs652145,-0.332  
13,48.837,rs9533738,-0.383  
13,48.882,rs17065323,-0.406  
13,48.892,rs9567352,-0.411  
13,48.892,rs9316067,-0.407  
13,48.892,rs9533758,-0.406  
13,48.898,rs4942273,-0.399  
13,48.921,rs4941481,-0.420  
13,48.953,rs9533775,-0.429  
13,49.038,rs2243839,-0.441  
13,49.045,rs1330101,-0.442  
13,49.059,rs7320491,-0.443  
13,49.084,rs2246264,-0.444  
13,49.114,rs9567399,-0.446  
13,49.151,rs2104755,-0.456  
13,49.189,rs17208897,-0.442  
13,49.223,rs2281848,-0.433  
13,49.231,rs12868519,-0.430  
13,49.274,rs6561176,-0.431  
13,49.504,rs963569,-0.430  
13,49.505,rs9567458,-0.430  
13,49.556,rs2786712,-0.423  
13,49.566,rs4942350,-0.421  
13,49.566,rs4942351,-0.421  
13,49.636,rs9533975,-0.441  
13,49.687,rs12427910,-0.427  
13,49.693,rs9567488,-0.434  
13,49.712,rs7332654,-0.442  
13,49.739,rs7317524,-0.451  
13,49.741,rs12865097,-0.452  
13,49.891,rs1747107,-0.423  
13,49.952,rs2025420,-0.432  
13,50.145,rs9526055,-0.424  
13,50.277,rs9526073,-0.385  
13,50.369,rs2985983,-0.425  
13,50.428,rs7330573,-0.429  
13,50.430,rs2985947,-0.429  
13,50.507,rs9534188,-0.456  
13,50.529,rs1536191,-0.464  
13,50.545,rs1072696,-0.483  
13,50.561,rs9316154,-0.513  
13,50.565,rs9534199,-0.517  
13,50.609,rs1325643,-0.518  
13,50.628,rs4942434,-0.530  
13,50.635,rs7997707,-0.531  
13,50.644,rs1325654,-0.521  
13,50.683,rs9526115,-0.524  
13,50.718,rs2766484,-0.524  
13,50.720,rs7982931,-0.524  
13,50.731,rs2573294,-0.487  
13,50.746,rs7996510,-0.494  
13,50.758,rs7330302,-0.508

13,50.762,rs2573283,-0.512  
13,50.788,rs2573260,-0.544  
13,50.813,rs12585823,-0.565  
13,50.843,rs9534271,-0.572  
13,50.951,rs2181617,-0.589  
13,50.954,rs17067700,-0.588  
13,50.960,rs2025736,-0.572  
13,51.008,rs1886040,-0.519  
13,51.087,rs2209092,-0.468  
13,51.097,rs2209090,-0.453  
13,51.152,rs6561302,-0.483  
13,51.216,rs912784,-0.557  
13,51.250,rs2765614,-0.589  
13,51.256,rs17067974,-0.592  
13,51.280,rs727487,-0.608  
13,51.338,rs12870900,-0.743  
13,51.353,rs912435,-0.760  
13,51.360,rs3742269,-0.767  
13,51.360,rs3742270,-0.767  
13,51.392,rs4942568,-0.702  
13,51.401,rs842383,-0.670  
13,51.411,rs9590984,-0.588  
13,51.414,rs9534475,-0.565  
13,51.422,rs17068766,-0.534  
13,51.422,rs6561329,-0.533  
13,51.446,rs1018578,-0.447  
13,51.451,rs9567729,-0.436  
13,51.455,rs9567733,-0.426  
13,51.465,rs622337,-0.397  
13,51.467,rs4942578,-0.426  
13,51.481,rs9534511,-0.377  
13,51.487,rs2039093,-0.368  
13,51.511,rs4942595,-0.332  
13,51.536,rs1536762,-0.319  
13,51.555,rs4942611,-0.302  
13,51.563,rs7332165,-0.294  
13,51.593,rs4142746,-0.269  
13,51.650,rs8002509,-0.231  
13,51.691,rs9526307,-0.219  
13,51.738,rs9534613,-0.217  
13,51.847,rs2503449,-0.253  
13,51.874,rs943238,-0.253  
13,52.054,rs1886439,-0.399  
13,52.072,rs9534844,-0.409  
13,52.282,rs1410117,-0.453  
13,52.308,rs645833,-0.452  
13,52.309,rs9526457,-0.452  
13,52.780,rs9595932,-0.439  
13,52.831,rs9595945,-0.436  
13,52.836,rs2026581,-0.436  
13,52.919,rs6561497,-0.440  
13,52.981,rs9316430,-0.438  
13,53.124,rs8002829,-0.430  
13,53.154,rs9568197,-0.415  
13,53.165,rs2407616,-0.415  
13,53.302,rs7322971,-0.351  
13,53.623,rs3809325,-0.327  
13,53.926,rs3903768,-0.330  
13,54.454,rs9535416,-0.362  
13,54.714,rs1028814,-0.365  
13,54.849,rs806321,-0.349

13,54.853,rs806345,-0.381  
13,54.873,rs1410113,-0.359  
13,54.885,rs201779,-0.352  
13,54.907,rs770391,-0.340  
13,54.908,rs7993968,-0.345  
13,54.919,rs706596,-0.384  
13,54.931,rs2540521,-0.404  
13,54.937,rs2706238,-0.413  
13,54.940,rs10467383,-0.418  
13,54.943,rs7331957,-0.422  
13,54.943,rs11616485,-0.422  
13,54.975,rs474012,-0.509  
13,54.984,rs1462031,-0.515  
13,54.991,rs9316511,-0.503  
13,54.995,rs9526706,-0.488  
13,55.031,rs2025945,-0.461  
13,55.046,rs11840971,-0.438  
13,55.055,rs6561611,-0.441  
13,55.057,rs9596437,-0.445  
13,55.063,rs3803200,-0.463  
13,55.076,rs8002769,-0.481  
13,55.085,rs927863,-0.501  
13,55.090,rs7325564,-0.515  
13,55.090,rs1022960,-0.515  
13,55.091,rs2094278,-0.518  
13,55.097,rs9285176,-0.518  
13,55.101,rs17252027,-0.514  
13,55.102,rs9535607,-0.511  
13,55.109,rs9563035,-0.495  
13,55.124,rs1077728,-0.479  
13,55.141,rs4942988,-0.462  
13,55.149,rs7325958,-0.490  
13,55.160,rs11842214,-0.492  
13,55.170,rs7338174,-0.494  
13,55.174,rs7983548,-0.495  
13,55.272,rs9563062,-0.510  
13,55.302,rs7332922,-0.507  
13,55.509,rs1543525,-0.486  
13,55.526,rs7318017,-0.484  
13,55.532,rs7326878,-0.482  
13,55.549,rs578134,-0.439  
13,55.558,rs4459459,-0.472  
13,55.596,rs17076104,-0.447  
13,55.974,rs9536079,-0.399  
13,56.014,rs1535576,-0.474  
13,56.020,rs1115871,-0.432  
13,56.026,rs997687,-0.397  
13,56.035,rs17053117,-0.393  
13,56.056,rs9536335,-0.409  
13,56.061,rs9536337,-0.413  
13,56.064,rs2298229,-0.415  
13,56.069,rs3803261,-0.419  
13,56.074,rs2298235,-0.417  
13,56.101,rs2806984,-0.401  
13,56.114,rs4886202,-0.392  
13,56.178,rs9563146,-0.388  
13,56.216,rs9596786,-0.389  
13,56.300,rs9536591,-0.387  
13,56.302,rs9316694,-0.387  
13,56.311,rs9568981,-0.385  
13,56.314,rs9596918,-0.391

13,56.317,rs706588,-0.391  
13,56.321,rs9563202,-0.391  
13,56.327,rs654775,-0.394  
13,56.331,rs9536672,-0.395  
13,56.337,rs8001194,-0.353  
13,56.340,rs7328532,-0.352  
13,56.354,rs9316728,-0.348  
13,56.356,rs9563233,-0.345  
13,56.357,rs1832696,-0.343  
13,56.358,rs9597001,-0.343  
13,56.372,rs9527255,-0.338  
13,56.373,rs2493675,-0.338  
13,56.387,rs1539237,-0.353  
13,56.406,rs9597069,-0.391  
13,56.410,rs1028774,-0.397  
13,56.422,rs3120890,-0.413  
13,56.448,rs9316785,-0.450  
13,56.467,rs4885913,-0.458  
13,56.557,rs9563423,-0.444  
13,56.588,rs9527559,-0.439  
13,56.682,rs17053883,-0.426  
13,56.810,rs1374481,-0.429  
13,56.813,rs9569712,-0.429  
13,56.842,rs9527681,-0.428  
13,56.875,rs9537793,-0.437  
13,57.072,rs2921406,-0.479  
13,57.111,rs4360824,-0.487  
13,57.224,rs9538051,-0.512  
13,57.241,rs9538073,-0.513  
13,57.281,rs1330742,-0.511  
13,57.337,rs9538162,-0.513  
13,57.355,rs12869090,-0.495  
13,57.355,rs11841892,-0.495  
13,57.396,rs9597861,-0.502  
13,57.583,rs4886114,-0.519  
13,57.605,rs2321997,-0.520  
13,57.643,rs6562010,-0.512  
13,57.655,rs7991723,-0.501  
13,57.700,rs9597949,-0.490  
13,57.715,rs17056143,-0.495  
13,57.720,rs4884323,-0.497  
13,57.731,rs17056224,-0.472  
13,57.737,rs4886139,-0.458  
13,57.770,rs901510,-0.433  
13,57.786,rs9538386,-0.426  
13,57.811,rs9527970,-0.418  
13,57.876,rs746816,-0.393  
13,57.919,rs1225405,-0.369  
13,57.926,rs1623579,-0.363  
13,57.946,rs1711782,-0.348  
13,58.186,rs7986379,-0.269  
13,58.200,rs341497,-0.270  
13,58.240,rs17729071,-0.278  
13,58.473,rs9592025,-0.320  
13,58.525,rs2487783,-0.300  
13,58.526,rs9563808,-0.300  
13,58.571,rs9598117,-0.296  
13,58.589,rs9317116,-0.320  
13,58.593,rs9538660,-0.326  
13,58.608,rs9528119,-0.321  
13,58.619,rs9528128,-0.326



13,58.838,rs4886250,-0.334  
13,58.846,rs1576377,-0.323  
13,58.850,rs1329701,-0.321  
13,58.859,rs17058620,-0.287  
13,58.860,rs1411145,-0.283  
13,58.897,rs3106557,-0.297  
13,58.961,rs3119873,-0.412  
13,58.971,rs3914414,-0.425  
13,59.021,rs9598200,-0.423  
13,59.025,rs9598204,-0.424  
13,59.072,rs7985758,-0.414  
13,59.074,rs9598229,-0.415  
13,59.104,rs1913556,-0.398  
13,59.115,rs3106598,-0.391  
13,59.130,rs1514551,-0.373  
13,59.171,rs2669333,-0.322  
13,59.441,rs2992170,-0.367  
13,59.531,rs9528622,-0.341  
13,59.628,rs17356288,-0.360  
13,59.637,rs4884489,-0.362  
13,59.662,rs10507697,-0.365  
13,59.705,rs2587605,-0.327  
13,59.715,rs2587602,-0.328  
13,59.767,rs9539845,-0.333  
13,59.986,rs4883727,-0.335  
13,60.032,rs3911994,-0.302  
13,60.055,rs269623,-0.304  
13,60.102,rs956300,-0.309  
13,60.258,rs9540053,-0.326  
13,60.313,rs9540074,-0.318  
13,60.335,rs7991961,-0.321  
13,60.461,rs9528794,-0.342  
13,60.471,rs649783,-0.343  
13,60.483,rs12428774,-0.346  
13,60.484,rs9540172,-0.346  
13,60.488,rs359384,-0.362  
13,60.554,rs396985,-0.356  
13,60.737,rs7994896,-0.348  
13,60.978,rs778437,-0.337  
13,61.161,rs10507721,-0.328  
13,61.267,rs9317526,-0.280  
13,61.289,rs7990415,-0.218  
13,61.302,rs11619878,-0.195  
13,61.416,rs1417216,-0.176  
13,61.495,rs9540556,-0.157  
13,61.501,rs2151399,-0.154  
13,61.548,rs17078058,-0.144  
13,61.564,rs7332806,-0.141  
13,61.609,rs2324857,-0.122  
13,61.618,rs2183456,-0.123  
13,61.637,rs166503,-0.120  
13,61.658,rs7986387,-0.112  
13,61.659,rs3843947,-0.112  
13,61.674,rs17583414,-0.107  
13,61.702,rs6562468,-0.097  
13,61.711,rs2224740,-0.097  
13,61.736,rs9564355,-0.096  
13,61.744,rs9540942,-0.096  
13,61.764,rs1323913,-0.096  
13,61.850,rs1323929,-0.083  
13,62.086,rs7336017,-0.053

13,62.116,rs7324254,-0.050  
13,62.156,rs1927821,-0.035  
13,62.199,rs9317651,-0.032  
13,62.413,rs1760854,-0.032  
13,62.419,rs9571811,-0.032  
13,62.424,rs2325065,-0.027  
13,62.428,rs1475808,-0.031  
13,62.432,rs167021,-0.035  
13,62.432,rs12876169,-0.034  
13,62.437,rs9599282,-0.035  
13,62.518,rs1146827,-0.019  
13,62.534,rs9571875,-0.018  
13,62.582,rs9541341,-0.015  
13,62.606,rs17083392,-0.014  
13,62.644,rs525327,-0.012  
13,62.694,rs1507198,-0.010  
13,62.738,rs9599332,-0.009  
13,62.745,rs937872,-0.009  
13,62.785,rs7997369,-0.003  
13,62.816,rs1340741,-0.002  
13,62.844,rs9529475,-0.000  
13,62.862,rs9541702,-0.000  
13,62.888,rs1340722,-0.002  
13,63.049,rs9529522,-0.002  
13,63.075,rs12429777,-0.002  
13,63.096,rs9317784,-0.002  
13,63.401,rs1330534,-0.006  
13,63.497,rs9541963,-0.011  
13,63.564,rs7986686,-0.012  
13,63.927,rs7985162,-0.008  
13,64.005,rs7984606,-0.008  
13,64.052,rs9599521,-0.008  
13,64.139,rs9542109,-0.007  
13,64.210,rs2210447,-0.005  
13,64.211,rs683300,-0.005  
13,64.282,rs302020,-0.003  
13,64.297,rs7322990,-0.003  
13,64.392,rs1887826,-0.000  
13,64.403,rs9529709,-0.000  
13,64.538,rs7986958,-0.000  
13,64.625,rs1930861,-0.005  
13,64.629,rs1930855,-0.005  
13,64.647,rs914906,-0.006  
13,64.778,rs9542407,-0.004  
13,64.791,rs9529782,-0.008  
13,64.916,rs9572516,-0.002  
13,65.071,rs1413141,0.001  
13,65.216,rs2586131,-0.001  
13,65.223,rs615018,-0.001  
13,65.284,rs4884901,-0.003  
13,65.302,rs9572541,-0.003  
13,65.338,rs566682,-0.002  
13,65.379,rs9529809,0.000  
13,65.384,rs1280914,0.000  
13,65.387,rs4884906,0.000  
13,65.420,rs9572564,-0.000  
13,65.453,rs9542535,-0.001  
13,65.476,rs950942,0.000  
13,65.486,rs17087794,0.000  
13,65.504,rs803853,0.000  
13,65.526,rs1911141,0.001

13,65.595,rs4884931,0.001  
13,65.714,rs10492467,0.001  
13,65.835,rs9572687,0.001  
13,65.995,rs7995527,0.002  
13,66.248,rs9572724,0.003  
13,66.278,rs7981837,0.003  
13,66.357,rs9572739,0.003  
13,66.567,rs9599848,0.000  
13,66.810,rs9599857,-0.000  
13,67.102,rs8000426,-0.000  
13,67.164,rs17088400,-0.000  
13,67.193,rs7993403,-0.000  
13,67.195,rs7998414,-0.000  
13,67.385,rs303942,-0.002  
13,67.506,rs9542775,-0.003  
13,67.507,rs7328290,-0.003  
13,67.597,rs9529945,-0.006  
13,67.697,rs2148513,-0.004  
13,67.763,rs7322145,-0.005  
13,67.785,rs517248,-0.006  
13,67.798,rs4884998,-0.008  
13,67.831,rs491183,-0.009  
13,67.840,rs9542922,-0.007  
13,67.844,rs9572959,-0.007  
13,67.862,rs7319520,-0.002  
13,67.887,rs4883910,-0.002  
13,67.925,rs9318078,-0.005  
13,67.988,rs7325978,-0.008  
13,68.000,rs1924957,-0.013  
13,68.095,rs1998678,-0.005  
13,68.114,rs9542990,-0.004  
13,68.149,rs17244714,-0.004  
13,68.195,rs11839068,-0.003  
13,68.341,rs1124204,-0.002  
13,68.421,rs11840463,-0.001  
13,68.662,rs1437656,-0.000  
13,68.728,rs4119478,0.000  
13,69.000,rs9543110,0.003  
13,69.156,rs7332615,0.003  
13,69.254,rs12874868,0.003  
13,69.795,rs4885065,0.001  
13,69.801,rs12869881,0.001  
13,69.823,rs1333099,0.001  
13,69.849,rs9600079,0.001  
13,69.896,rs9573135,0.004  
13,69.907,rs1983981,0.005  
13,69.916,rs6562747,0.006  
13,69.928,rs1327620,0.008  
13,69.949,rs7998062,0.009  
13,69.955,rs9543307,0.008  
13,69.972,rs4885088,0.014  
13,70.007,rs9543325,0.014  
13,70.032,rs17090102,0.020  
13,70.050,rs4885098,0.026  
13,70.099,rs7982832,0.028  
13,70.314,rs17090302,0.028  
13,70.348,rs2325539,0.028  
13,70.403,rs7321306,0.028  
13,70.546,rs7992690,0.019  
13,70.596,rs10219971,0.021  
13,70.602,rs9600160,0.022

13,70.629,rs1324059,0.020  
13,70.634,rs2875666,0.015  
13,70.651,rs1011058,0.004  
13,70.706,rs1324061,0.001  
13,70.719,rs9573305,0.001  
13,70.756,rs2182667,0.001  
13,70.783,rs9565053,0.001  
13,70.795,rs9530253,0.001  
13,70.796,rs9600179,0.001  
13,70.831,rs17061643,0.002  
13,70.890,rs9318226,0.013  
13,70.928,rs9600191,0.011  
13,70.980,rs1570745,0.008  
13,71.073,rs7324708,0.013  
13,71.150,rs9565073,0.014  
13,71.177,rs4885149,0.015  
13,71.291,rs7988654,0.021  
13,71.554,rs7321013,0.047  
13,71.661,rs9543630,0.073  
13,71.716,rs6562832,0.088  
13,71.817,rs1409588,0.080  
13,71.833,rs1326731,0.088  
13,71.870,rs1326701,0.106  
13,71.898,rs10507828,0.127  
13,71.915,rs9593015,0.139  
13,71.922,rs1327745,0.139  
13,71.955,rs9530368,0.143  
13,71.997,rs7989384,0.136  
13,72.007,rs875548,0.140  
13,72.090,rs8001831,0.139  
13,72.274,rs1538946,0.158  
13,72.276,rs7992778,0.158  
13,72.276,rs9573460,0.158  
13,72.347,rs1326057,0.138  
13,72.359,rs7318676,0.135  
13,72.469,rs7327783,0.147  
13,72.496,rs481952,0.147  
13,72.509,rs2060136,0.147  
13,72.510,rs532095,0.147  
13,72.535,rs9543882,0.154  
13,72.563,rs566337,0.164  
13,72.577,rs2297208,0.174  
13,72.579,rs517130,0.152  
13,72.625,rs568772,0.138  
13,72.756,rs9600477,0.159  
13,72.803,rs7319334,0.165  
13,72.938,rs9593109,0.169  
13,72.953,rs4884012,0.168  
13,72.997,rs1570554,0.161  
13,73.111,rs4884021,0.143  
13,73.163,rs9544061,0.135  
13,73.204,rs9544077,0.130  
13,73.233,rs1538902,0.127  
13,73.256,rs1340711,0.129  
13,73.259,rs9593147,0.129  
13,74.339,rs9544492,0.215  
13,74.398,rs8001791,0.216  
13,74.475,rs9565348,0.250  
13,74.759,rs1053985,0.254  
13,74.988,rs9574113,0.234  
13,75.165,rs7994107,0.233

13,75.299,rs11616218,0.235  
13,75.325,rs2254690,0.253  
13,75.331,rs17069125,0.256  
13,75.336,rs3908461,0.259  
13,75.350,rs3861137,0.271  
13,75.350,rs12583965,0.272  
13,75.354,rs7332088,0.272  
13,75.355,rs1972228,0.273  
13,75.371,rs1324796,0.278  
13,75.433,rs9544800,0.277  
13,75.452,rs11619235,0.279  
13,75.486,rs9530803,0.291  
13,75.492,rs9593346,0.290  
13,75.512,rs9530807,0.291  
13,75.526,rs1931035,0.288  
13,75.531,rs9530815,0.286  
13,75.567,rs7992385,0.269  
13,75.581,rs1341138,0.272  
13,75.587,rs7327514,0.263  
13,75.625,rs9574337,0.187  
13,75.642,rs9601157,0.157  
13,75.647,rs9544950,0.154  
13,75.755,rs661907,0.174  
13,75.835,rs7986836,0.203  
13,75.872,rs2988039,0.217  
13,75.916,rs9318616,0.212  
13,75.965,rs9574389,0.150  
13,76.248,rs9601248,0.126  
13,76.286,rs1998452,0.125  
13,76.346,rs17071785,0.126  
13,76.372,rs1577406,0.127  
13,76.387,rs2095470,0.128  
13,76.515,rs12876803,0.137  
13,76.564,rs17794787,0.132  
13,76.605,rs3843950,0.122  
13,76.672,rs2329151,0.135  
13,76.692,rs3910572,0.139  
13,76.741,rs2329153,0.185  
13,76.759,rs9318678,0.189  
13,76.763,rs8001641,0.190  
13,76.835,rs518569,0.191  
13,76.842,rs9574595,0.185  
13,76.867,rs9574602,0.161  
13,76.882,rs7992472,0.147  
13,76.888,rs9574614,0.144  
13,76.893,rs9531036,0.142  
13,77.006,rs11840723,0.153  
13,77.201,rs7321702,0.173  
13,77.213,rs1772587,0.173  
13,77.218,rs1622512,0.173  
13,77.327,rs7327912,0.163  
13,77.404,rs7336590,0.159  
13,77.462,rs1360632,0.157  
13,77.480,rs9318729,0.153  
13,77.499,rs1855259,0.127  
13,77.512,rs2329177,0.126  
13,77.546,rs9545617,0.148  
13,77.614,rs1146978,0.149  
13,77.626,rs9318765,0.149  
13,77.699,rs6563216,0.149  
13,77.726,rs9545770,0.151

13,77.781,rs1490022,0.135  
13,77.791,rs2151504,0.129  
13,77.815,rs1602204,0.115  
13,77.852,rs1336741,0.099  
13,77.854,rs9531268,0.099  
13,77.865,rs7332524,0.097  
13,77.885,rs2173141,0.090  
13,77.898,rs9601838,0.094  
13,77.945,rs7984003,0.107  
13,78.015,rs9318882,0.130  
13,78.025,rs9546178,0.134  
13,78.044,rs1984087,0.129  
13,78.068,rs7319735,0.121  
13,78.149,rs7992515,0.112  
13,78.460,rs985035,0.050  
13,78.642,rs9593836,0.063  
13,78.688,rs1413854,0.067  
13,78.754,rs4255684,0.073  
13,78.780,rs7992606,0.075  
13,78.783,rs1446756,0.091  
13,78.850,rs7491993,0.089  
13,78.859,rs2204502,0.088  
13,78.946,rs4911044,0.077  
13,78.952,rs9546985,0.076  
13,78.966,rs17079019,0.073  
13,78.992,rs7336296,0.068  
13,79.075,rs2497410,0.050  
13,79.086,rs2497421,0.047  
13,79.101,rs4911070,0.059  
13,79.124,rs4349048,0.052  
13,79.138,rs7318579,0.052  
13,79.200,rs1928141,0.048  
13,79.244,rs1764970,0.046  
13,79.269,rs1337278,0.047  
13,79.293,rs431057,0.055  
13,79.344,rs9602954,0.069  
13,79.351,rs1981084,0.058  
13,79.445,rs9514373,0.066  
13,79.456,rs1939662,0.066  
13,79.460,rs7337110,0.073  
13,79.464,rs4772827,0.080  
13,79.505,rs17650176,0.082  
13,79.519,rs9518594,0.083  
13,79.543,rs1502069,0.079  
13,79.597,rs2880005,0.070  
13,79.732,rs9523416,0.067  
13,79.915,rs9525064,0.055  
13,79.949,rs11619733,0.052  
13,79.991,rs7999681,0.048  
13,80.013,rs10507966,0.047  
13,80.048,rs9582262,0.040  
13,80.053,rs9517479,0.039  
13,80.066,rs1414011,0.038  
13,80.093,rs4540935,0.043  
13,80.111,rs2992104,0.050  
13,80.115,rs10507969,0.050  
13,80.120,rs10507970,0.051  
13,80.174,rs7987189,0.056  
13,80.238,rs12866357,0.068  
13,80.406,rs1413279,0.103  
13,80.604,rs2018070,0.135

13,80.681,rs7328476,0.162  
13,80.809,rs1120556,0.168  
13,80.905,rs4366591,0.183  
13,80.940,rs1536355,0.189  
13,80.979,rs9521631,0.193  
13,81.123,rs9522205,0.190  
13,81.490,rs9588534,0.182  
13,81.572,rs17712596,0.180  
13,81.619,rs1041378,0.181  
13,81.781,rs9555880,0.209  
13,81.810,rs1159195,0.214  
13,81.837,rs3736408,0.217  
13,81.868,rs1504432,0.217  
13,82.011,rs7329978,0.167  
13,82.062,rs9515642,0.150  
13,82.064,rs16943501,0.150  
13,82.065,rs1932298,0.150  
13,82.067,rs9560478,0.161  
13,82.072,rs2349953,0.197  
13,82.151,rs1341647,0.215  
13,82.181,rs1491030,0.222  
13,82.225,rs2805646,0.213  
13,82.331,rs4773558,0.188  
13,82.408,rs7328705,0.194  
13,82.420,rs9515710,0.193  
13,82.562,rs7984044,0.240  
13,82.567,rs9556015,0.253  
13,82.573,rs997715,0.271  
13,82.588,rs7997970,0.265  
13,82.670,rs9560635,0.237  
13,82.787,rs7338038,0.228  
13,82.821,rs9523030,0.225  
13,82.845,rs1572962,0.229  
13,82.924,rs828246,0.227  
13,82.972,rs13378922,0.232  
13,82.978,rs9523062,0.233  
13,83.098,rs16944919,0.245  
13,83.314,rs9523247,0.269  
13,83.332,rs898271,0.270  
13,83.355,rs9301708,0.273  
13,83.387,rs7324853,0.277  
13,83.612,rs9523299,0.311  
13,83.649,rs9523304,0.336  
13,83.793,rs9989098,0.343  
13,83.797,rs9560797,0.343  
13,83.820,rs534212,0.358  
13,83.827,rs4771834,0.364  
13,83.848,rs9523342,0.370  
13,83.999,rs7995778,0.392  
13,84.023,rs725040,0.405  
13,84.106,rs342693,0.439  
13,84.192,rs7984514,0.431  
13,84.285,rs2352538,0.450  
13,84.330,rs7986588,0.461  
13,84.355,rs9560935,0.469  
13,84.359,rs4773668,0.466  
13,84.389,rs6492591,0.361  
13,84.407,rs7987675,0.357  
13,84.486,rs9561023,0.320  
13,84.490,rs7326944,0.319  
13,84.517,rs7994262,0.312

13,84.575,rs9584035,0.290  
13,84.605,rs7319083,0.279  
13,84.620,rs9589601,0.271  
13,84.635,rs1333672,0.274  
13,84.646,rs9523752,0.266  
13,84.958,rs1326107,0.261  
13,85.647,rs319514,0.344  
13,85.856,rs319533,0.408  
13,86.012,rs16948469,0.378  
13,86.136,rs1328368,0.351  
13,86.209,rs1323998,0.393  
13,86.658,rs7992272,0.387  
13,86.680,rs9301881,0.389  
13,86.726,rs970263,0.395  
13,86.758,rs9561361,0.396  
13,86.767,rs12586008,0.396  
13,86.968,rs9584127,0.437  
13,86.979,rs1445253,0.396  
13,87.061,rs1037072,0.410  
13,87.062,rs9561405,0.407  
13,87.094,rs7983396,0.357  
13,87.412,rs4301888,0.319  
13,87.495,rs4771880,0.308  
13,87.798,rs12427786,0.337  
13,87.988,rs12855484,0.351  
13,88.385,rs1536780,0.284  
13,88.513,rs7322047,0.293  
13,88.555,rs595509,0.296  
13,88.607,rs680323,0.304  
13,88.671,rs7991937,0.325  
13,88.718,rs9589923,0.288  
13,88.738,rs9524362,0.273  
13,88.750,rs7321299,0.265  
13,88.770,rs7330788,0.173  
13,88.774,rs9524681,0.161  
13,88.800,rs1925856,0.111  
13,88.813,rs2148065,0.102  
13,88.863,rs7324065,0.070  
13,88.866,rs1750190,0.069  
13,88.882,rs943290,0.067  
13,88.915,rs1564355,0.083  
13,88.919,rs1729741,0.093  
13,88.920,rs2766482,0.100  
13,88.945,rs9561797,0.150  
13,88.958,rs3843689,0.206  
13,88.963,rs2487566,0.214  
13,88.996,rs9524860,0.221  
13,89.010,rs7325861,0.239  
13,89.039,rs8001444,0.278  
13,89.048,rs2993590,0.289  
13,89.061,rs8001940,0.305  
13,89.098,rs7982352,0.336  
13,89.134,rs7333503,0.360  
13,89.156,rs3898012,0.369  
13,89.164,rs7984974,0.371  
13,89.167,rs9584312,0.334  
13,89.320,rs7324577,0.335  
13,90.231,rs9562057,0.338  
13,90.435,rs11069237,0.322  
13,90.582,rs1164591,0.292  
13,91.037,rs12864425,0.317



13,91.103,rs1924584,0.314  
13,91.359,rs9516774,0.286  
13,91.481,rs9554374,0.318  
13,91.643,rs9516806,0.358  
13,91.757,rs1847022,0.361  
13,91.787,rs8000030,0.360  
13,92.088,rs1999088,0.357  
13,92.106,rs9516890,0.357  
13,92.155,rs12019957,0.357  
13,92.274,rs1806507,0.399  
13,92.587,rs12870589,0.423  
13,92.667,rs9300430,0.356  
13,92.737,rs1318759,0.325  
13,92.884,rs2096050,0.276  
13,92.897,rs2792969,0.282  
13,93.014,rs9513309,0.349  
13,93.022,rs9584692,0.353  
13,93.068,rs4771286,0.377  
13,93.075,rs1415707,0.379  
13,93.184,rs7996672,0.449  
13,93.240,rs7329817,0.452  
13,93.473,rs631618,0.456  
13,93.490,rs285055,0.464  
13,93.540,rs7328138,0.416  
13,93.556,rs12871665,0.392  
13,93.570,rs602626,0.301  
13,93.571,rs9513353,0.298  
13,93.609,rs9634510,0.297  
13,93.614,rs285083,0.295  
13,93.636,rs7317340,0.286  
13,93.667,rs285100,0.270  
13,93.731,rs4772049,0.237  
13,93.740,rs285107,0.239  
13,93.798,rs7318267,0.284  
13,93.823,rs9517237,0.259  
13,93.826,rs7997235,0.254  
13,93.847,rs17455303,0.221  
13,93.872,rs679363,0.209  
13,93.891,rs9556929,0.218  
13,93.896,rs2390038,0.244  
13,93.966,rs2127779,0.193  
13,93.986,rs587377,0.186  
13,93.986,rs586538,0.186  
13,94.014,rs2772354,0.192  
13,94.038,rs3783015,0.193  
13,94.061,rs11616605,0.178  
13,94.072,rs7981744,0.170  
13,94.078,rs9584843,0.166  
13,94.084,rs3825435,0.161  
13,94.089,rs7333410,0.161  
13,94.091,rs9584845,0.154  
13,94.097,rs998733,0.137  
13,94.150,rs12858868,0.122  
13,94.222,rs9556966,0.103  
13,94.322,rs4772102,0.102  
13,94.342,rs7139717,0.103  
13,94.373,rs4771308,0.116  
13,94.386,rs4771309,0.157  
13,94.514,rs6491441,0.157  
13,94.566,rs9513475,0.156  
13,94.578,rs3782997,0.168

13,94.616,rs1543668,0.167  
13,94.646,rs12427885,0.166  
13,94.855,rs11617918,0.138  
13,94.924,rs11843068,0.107  
13,95.387,rs9554579,0.048  
13,95.595,rs6491503,0.041  
13,95.671,rs9517767,0.040  
13,95.676,rs12584161,0.040  
13,95.695,rs9517783,0.040  
13,95.791,rs2806283,0.039  
13,95.816,rs6491526,0.042  
13,95.878,rs1105576,0.051  
13,96.000,rs1000022,0.072  
13,96.004,rs7332098,0.075  
13,96.012,rs2806295,0.080  
13,96.032,rs1028710,0.069  
13,96.049,rs17612107,0.062  
13,96.073,rs7331804,0.049  
13,96.084,rs7333886,0.046  
13,96.120,rs7317678,0.039  
13,96.177,rs7986370,0.034  
13,96.192,rs7988924,0.033  
13,96.193,rs17578011,0.033  
13,96.268,rs13542,0.049  
13,96.375,rs1433228,0.045  
13,96.484,rs1890139,0.041  
13,96.538,rs2152881,0.040  
13,96.778,rs16957301,0.036  
13,96.957,rs1407761,0.046  
13,97.157,rs9518097,0.046  
13,97.204,rs8002073,0.047  
13,97.297,rs9518128,0.043  
13,97.369,rs2786953,0.033  
13,97.382,rs4771370,0.032  
13,97.390,rs1711178,0.022  
13,97.408,rs746208,0.020  
13,97.510,rs12428596,0.023  
13,97.558,rs9518182,0.033  
13,97.563,rs9585528,0.031  
13,97.605,rs4772336,0.026  
13,97.663,rs3886776,0.020  
13,97.673,rs9585548,0.019  
13,97.676,rs2104452,0.019  
13,97.712,rs9513824,0.014  
13,97.725,rs2803212,0.022  
13,97.729,rs2765330,0.022  
13,97.805,rs9585585,0.030  
13,97.813,rs2803224,0.032  
13,97.832,rs2803218,0.014  
13,97.872,rs3751405,0.015  
13,97.899,rs1289556,0.009  
13,97.906,rs671167,0.009  
13,97.952,rs9300647,0.009  
13,97.962,rs640960,0.008  
13,97.968,rs583546,0.008  
13,97.980,rs9585626,0.008  
13,98.012,rs660622,0.010  
13,98.036,rs13378735,0.013  
13,98.042,rs680711,0.020  
13,98.183,rs7335296,0.023  
13,98.197,rs4772363,0.023

13,98.227,rs9518364,0.014  
13,98.398,rs8000376,0.016  
13,98.471,rs7998783,0.014  
13,98.473,rs9300677,0.014  
13,98.476,rs3783210,0.017  
13,98.477,rs16959194,0.019  
13,98.478,rs7986646,0.024  
13,98.478,rs2217903,0.027  
13,98.478,rs1975266,0.027  
13,98.478,rs9585750,0.026  
13,98.480,rs9300690,0.041  
13,98.524,rs4558266,0.051  
13,98.538,rs9582522,0.056  
13,98.594,rs913462,0.079  
13,98.631,rs3007765,0.081  
13,98.686,rs869802,0.068  
13,98.743,rs2476227,0.058  
13,98.743,rs9518600,0.058  
13,98.862,rs4772437,0.057  
13,98.919,rs7330977,0.062  
13,98.949,rs652157,0.069  
13,99.268,rs536863,0.060  
13,99.407,rs7986923,0.059  
13,99.730,rs1336714,0.054  
13,99.758,rs9585881,0.052  
13,99.957,rs1336661,0.045  
13,100.221,rs12859468,0.025  
13,100.224,rs7993414,0.025  
13,100.507,rs3809373,0.014  
13,100.806,rs9586004,0.008  
13,100.831,rs9557947,0.008  
13,100.867,rs7984853,0.007  
13,100.934,rs9300766,0.008  
13,101.310,rs4772523,0.007  
13,101.373,rs1925978,0.005  
13,101.489,rs3918333,0.001  
13,101.808,rs1730642,0.003  
13,101.809,rs1730643,0.003  
13,101.823,rs9518947,0.008  
13,102.028,rs2031046,0.018  
13,102.054,rs16961766,0.018  
13,102.290,rs1888323,0.014  
13,102.401,rs1330778,0.021  
13,102.575,rs10220273,0.027  
13,102.635,rs9558063,0.033  
13,102.657,rs1888322,0.024  
13,102.700,rs7324647,0.023  
13,102.726,rs673358,0.022  
13,102.764,rs2065550,0.021  
13,102.880,rs16962524,0.018  
13,102.927,rs9300822,0.017  
13,103.378,rs7317234,0.021  
13,103.595,rs9586243,0.023  
13,103.646,rs1341439,0.025  
13,103.731,rs1274749,0.020  
13,103.748,rs16963224,0.020  
13,103.784,rs1537197,0.019  
13,103.817,rs1361576,0.019  
13,104.005,rs1336609,0.020  
13,104.145,rs3916938,0.019  
13,104.223,rs2390998,0.016

13,104.326,rs12184606,0.016  
13,104.330,rs9519177,0.016  
13,104.440,rs4772597,0.018  
13,104.488,rs1913208,0.019  
13,104.510,rs9558241,0.023  
13,104.517,rs713607,0.020  
13,104.525,rs4772604,0.017  
13,104.564,rs907729,0.019  
13,104.594,rs9558257,0.021  
13,105.371,rs7323636,0.011  
13,105.472,rs9300917,0.012  
13,105.546,rs9519308,0.012  
13,105.840,rs9586513,0.006  
13,106.050,rs7981507,0.010  
13,106.148,rs11841281,0.013  
13,106.250,rs2391128,0.016  
13,106.389,rs9555079,0.023  
13,106.642,rs11838415,0.036  
13,106.647,rs798880,0.037  
13,106.679,rs701565,0.040  
13,106.739,rs11841526,0.053  
13,106.877,rs754394,0.068  
13,106.937,rs7331363,0.070  
13,107.063,rs323450,0.102  
13,107.215,rs7320588,0.174  
13,107.240,rs9519494,0.197  
13,107.440,rs9919881,0.212  
13,107.498,rs7320561,0.220  
13,107.660,rs1536360,0.254  
13,107.678,rs7996230,0.263  
13,107.720,rs9300983,0.304  
13,107.883,rs3007246,0.427  
13,107.956,rs3015345,0.475  
13,107.999,rs3007290,0.511  
13,108.001,rs3015356,0.512  
13,108.010,rs3015359,0.519  
13,108.067,rs12430622,0.553  
13,108.082,rs4771493,0.562  
13,108.139,rs7981764,0.615  
13,108.181,rs1324750,0.613  
13,108.197,rs12859775,0.615  
13,108.201,rs9514379,0.628  
13,108.211,rs732442,0.622  
13,108.281,rs9519650,0.617  
13,108.308,rs3916962,0.643  
13,108.399,rs9558552,0.688  
13,108.487,rs701567,0.705  
13,108.505,rs954580,0.737  
13,108.514,rs9583006,0.754  
13,108.569,rs9519707,0.859  
13,108.633,rs4441130,0.865  
13,108.684,rs3916972,0.863  
13,108.708,rs1421296,0.803  
13,108.765,rs16967019,0.776  
13,108.943,rs9555193,0.780  
13,108.948,rs3899559,0.780  
13,108.964,rs2149145,0.787  
13,108.979,rs10508164,0.812  
13,109.026,rs1328094,0.842  
13,109.119,rs7981276,1.006  
13,109.167,rs9555200,1.079

13,109.193,rs9301077,1.089  
13,109.253,rs4772723,1.161  
13,109.290,rs4772725,1.329  
13,109.326,rs11841251,1.333  
13,109.348,rs7319510,1.330  
13,109.360,rs9558651,1.324  
13,109.389,rs470422,1.312  
13,109.481,rs9519894,1.290  
13,109.710,rs4772736,1.245  
13,109.758,rs9558671,1.243  
13,109.863,rs16968126,1.240  
13,109.890,rs9519937,1.241  
13,109.987,rs7338655,1.174  
13,110.026,rs17522272,1.175  
13,110.057,rs9558678,1.118  
13,110.135,rs11616330,1.116  
13,110.148,rs1978944,1.118  
13,110.287,rs12868856,1.128  
13,110.467,rs9519971,1.154  
13,110.546,rs9284233,1.165  
13,110.587,rs9555233,1.170  
13,111.466,rs4772774,1.279  
13,111.623,rs2169659,1.207  
13,111.776,rs4771529,1.198  
13,111.955,rs4238247,1.182  
13,112.032,rs911997,1.144  
13,112.061,rs16968691,1.112  
13,112.114,rs2391298,1.048  
13,112.192,rs1407584,1.021  
13,112.198,rs7322914,1.020  
13,112.346,rs9520092,1.016  
13,112.381,rs2391340,1.006  
13,112.415,rs8000078,0.997  
13,112.751,rs2391345,0.971  
13,112.882,rs9520124,0.959  
13,112.897,rs2391352,0.948  
13,112.953,rs7992345,0.934  
13,112.963,rs9520129,0.932  
13,113.140,rs951749,0.899  
13,113.156,rs6492031,0.896  
13,113.197,rs8002967,0.893  
13,113.309,rs9587240,0.883  
13,113.398,rs1485626,0.898  
13,113.451,rs9301172,0.849  
13,113.480,rs12429879,0.841  
13,113.591,rs7333889,0.817  
13,113.624,rs9301178,0.811  
13,113.644,rs4509878,0.808  
13,113.852,rs2806508,0.762  
13,113.864,rs2806510,0.763  
13,113.892,rs2769917,0.767  
13,113.909,rs2806518,0.766  
13,113.919,rs2182958,0.776  
13,113.947,rs2769924,0.760  
13,113.951,rs10508183,0.759  
13,113.974,rs4771555,0.752  
13,114.008,rs9514629,0.765  
13,114.055,rs7993272,0.835  
13,114.056,rs16952130,0.836  
13,114.081,rs4772864,0.854  
13,114.215,rs1022876,0.825

13,114.262,rs9559025,0.837  
13,114.283,rs4444189,0.840  
13,114.334,rs7998513,0.788  
13,114.390,rs7320409,0.828  
13,114.407,rs16970118,0.824  
13,114.476,rs10492715,0.774  
13,114.528,rs977719,0.730  
13,114.550,rs16970558,0.726  
13,114.580,rs2809285,0.720  
13,114.659,rs1998564,0.587  
13,114.671,rs7998212,0.577  
13,114.719,rs1886228,0.572  
13,114.805,rs9587423,0.538  
13,114.837,rs3858799,0.478  
13,114.956,rs9520569,0.428  
13,115.039,rs9520584,0.393  
13,115.049,rs7990930,0.385  
13,115.100,rs9520594,0.344  
13,115.109,rs7988858,0.344  
13,115.144,rs816995,0.348  
13,115.161,rs1771138,0.350  
13,115.234,rs7322238,0.341  
13,115.432,rs12871532,0.377  
13,115.454,rs7985095,0.370  
13,115.466,rs16971732,0.369  
13,115.473,rs9559215,0.368  
13,115.493,rs9587495,0.362  
13,115.503,rs4325412,0.377  
13,115.543,rs16971810,0.435  
13,115.546,rs12874612,0.440  
13,115.603,rs7987249,0.446  
13,115.637,rs9520800,0.444  
13,115.697,rs16972078,0.449  
13,115.701,rs8002852,0.449  
13,115.725,rs9514823,0.400  
13,115.780,rs1805388,0.403  
13,115.867,rs2582869,0.407  
13,115.909,rs1224141,0.405  
13,116.006,rs766106,0.410  
13,116.028,rs11069734,0.414  
13,116.037,rs9559307,0.416  
13,116.185,rs4772971,0.431  
13,116.226,rs16972513,0.443  
13,116.232,rs1951896,0.442  
13,116.307,rs2391644,0.429  
13,116.545,rs4772979,0.393  
13,116.636,rs12858695,0.383  
13,116.736,rs7321197,0.379  
13,116.927,rs9583277,0.379  
13,117.016,rs4772988,0.368  
13,117.020,rs1887124,0.404  
13,117.032,rs9555495,0.402  
13,117.287,rs1022801,0.354  
13,117.342,rs984300,0.355  
13,117.493,rs1856282,0.394  
13,117.501,rs9301328,0.395  
13,117.559,rs196166,0.425  
13,117.701,rs9521095,0.411  
13,117.849,rs9587731,0.400  
13,117.959,rs277796,0.364  
13,117.979,rs3858816,0.382

13,117.990,rs1929293,0.392  
13,118.124,rs9514966,0.397  
13,118.132,rs1431273,0.401  
13,118.207,rs277836,0.386  
13,118.300,rs4771625,0.415  
13,118.353,rs157000,0.376  
13,118.499,rs275946,0.346  
13,118.548,rs9521192,0.342  
13,118.597,rs594348,0.343  
13,118.620,rs1028724,0.334  
13,118.732,rs7992004,0.350  
13,118.845,rs9634469,0.369  
13,118.857,rs8002089,0.371  
13,118.960,rs9555576,0.380  
13,119.249,rs7325702,0.400  
13,119.405,rs9555607,0.384  
13,119.423,rs1328238,0.383  
13,119.462,rs1410418,0.367  
13,119.589,rs9521382,0.375  
13,119.781,rs6492204,0.330  
13,119.829,rs1576166,0.347  
13,119.921,rs4771635,0.397  
13,119.923,rs10492479,0.398  
13,119.965,rs16974374,0.415  
13,120.177,rs331622,0.506  
13,120.242,rs9515094,0.535  
13,120.273,rs331974,0.582  
13,120.344,rs331985,0.566  
13,120.348,rs2076915,0.562  
13,120.389,rs2391784,0.550  
13,120.392,rs2164172,0.548  
13,120.408,rs3910315,0.542  
13,120.614,rs12584136,0.593  
13,120.621,rs9521509,0.594  
13,120.943,rs336224,0.530  
13,121.000,rs336214,0.518  
13,121.007,rs1414320,0.553  
13,121.052,rs9515125,0.486  
13,121.399,rs4773106,0.382  
13,121.447,rs12429959,0.339  
13,121.509,rs4773112,0.325  
13,121.627,rs4503663,0.302  
13,121.759,rs2391812,0.291  
13,121.883,rs7319307,0.284  
13,121.928,rs1192201,0.243  
13,121.930,rs3825481,0.241  
13,121.953,rs1133219,0.218  
13,121.970,rs3742207,0.213  
13,121.974,rs1470428,0.211  
13,121.981,rs12868126,0.204  
13,122.060,rs1143914,0.127  
13,122.064,rs9515168,0.102  
13,122.067,rs3783101,0.104  
13,122.071,rs9301436,0.107  
13,122.118,rs4145072,0.163  
13,122.124,rs72509,0.165  
13,122.149,rs903352,0.170  
13,122.182,rs561437,0.159  
13,122.209,rs9301445,0.163  
13,122.226,rs2391824,0.183  
13,122.243,rs4773155,0.263

13,122.269,rs1556122,0.304  
13,122.322,rs872587,0.385  
13,122.439,rs4512966,0.412  
13,122.452,rs4255644,0.443  
13,122.476,rs9555701,0.439  
13,122.517,rs4773191,0.417  
13,122.562,rs9555714,0.390  
13,122.574,rs445348,0.387  
13,122.575,rs387298,0.387  
13,122.602,rs7327721,0.393  
13,122.653,rs912943,0.411  
13,122.677,rs766974,0.430  
13,122.718,rs4773223,0.471  
13,122.724,rs9559849,0.476  
13,122.726,rs4773225,0.439  
13,122.861,rs4771705,0.412  
13,122.968,rs7999702,0.412  
13,123.018,rs3098728,0.414  
13,123.066,rs3858825,0.442  
13,123.085,rs328794,0.435  
13,123.118,rs328818,0.447  
13,123.180,rs4771711,0.418  
13,123.190,rs4771712,0.413  
13,123.240,rs6492325,0.421  
13,123.356,rs4500581,0.432  
13,123.423,rs9522040,0.472  
13,123.450,rs7996868,0.485  
13,123.472,rs8000668,0.488  
13,123.564,rs4771726,0.508  
13,123.648,rs4771732,0.554  
13,123.679,rs860520,0.618  
13,123.704,rs7998332,0.575  
13,124.393,rs1536051,0.498  
13,124.419,rs2477466,0.489  
13,124.490,rs2479960,0.475  
13,124.809,rs1164133,0.450  
13,124.847,rs1164128,0.413  
13,124.936,rs7336690,0.432  
13,124.955,rs9588431,0.417  
13,124.974,rs9588435,0.395  
13,125.039,rs9515423,0.360  
13,125.179,rs1151440,0.281  
13,125.239,rs997702,0.228  
13,125.263,rs1151455,0.216  
13,125.305,rs1888306,0.216  
13,125.333,rs1571625,0.215  
13,125.407,rs9522264,0.219  
13,125.567,rs9555818,0.232  
13,125.586,rs7335928,0.235  
13,125.781,rs1105513,0.270  
13,125.821,rs7989477,0.243  
13,126.285,rs4293272,0.178  
13,126.329,rs4362282,0.163  
13,126.468,rs2146439,0.117  
13,126.558,rs9550223,0.082  
13,126.697,rs9549384,0.072  
13,126.839,rs942335,0.060  
13,126.964,rs11164144,0.040  
13,126.987,rs7995146,0.033  
13,127.023,rs2196579,0.020  
13,127.066,rs7991981,0.016



13,127.076,rs9549854,0.018  
13,127.112,rs9324262,0.008  
13,127.190,rs9577637,0.009  
13,127.262,rs928194,0.011  
13,127.278,rs7322849,0.009  
13,127.307,rs2183443,0.005  
13,127.479,rs9549948,0.002  
13,127.718,rs4611350,0.002  
13,127.793,rs1928940,0.002  
13,127.873,rs1109306,0.002  
13,127.934,rs750989,0.002  
13,127.970,rs4907715,0.001  
13,127.972,rs9550097,0.001  
13,128.099,rs2274574,0.003  
13,128.387,rs1952109,0.011  
13,128.433,rs7323548,0.014  
13,128.438,rs942919,0.014  
13,128.539,rs6577102,0.027  
13,128.564,rs1571621,0.026  
13,128.590,rs7328960,0.025  
13,128.602,rs7338610,0.024  
13,128.780,rs17763986,0.022  
13,128.837,rs9549575,0.022  
13,128.851,rs945972,0.024  
13,128.910,rs4907561,0.046  
13,128.929,rs1933199,0.047  
13,128.967,rs7998446,0.043  
13,129.000,rs2993285,0.034  
13,129.056,rs2993305,0.021  
13,129.097,rs9577451,0.015  
13,129.132,rs527264,0.012  
13,129.149,rs2146752,0.013  
13,129.186,rs3211719,0.014  
13,129.189,rs556694,0.014  
13,129.287,rs3751411,0.027  
13,129.368,rs3814258,0.025  
13,129.409,rs1078712,0.019  
13,129.440,rs12871648,0.015  
13,129.510,rs4907623,0.003  
13,129.572,rs7989816,0.002  
13,129.584,rs7991325,0.002  
13,129.592,rs9549790,0.002  
13,129.687,rs9805651,0.008  
13,129.827,rs4150724,0.014  
13,129.877,rs12875059,0.015  
13,129.905,rs9796234,0.005  
13,130.152,rs9604512,0.013  
13,130.202,rs7996080,0.014  
13,130.238,rs7323426,0.015  
13,130.255,rs11618091,0.015  
13,130.295,rs11259844,0.015  
13,130.629,rs9314891,0.004  
13,130.685,rs7317882,0.005  
13,130.866,rs7327124,0.009  
13,130.914,rs3813131,0.009  
14,9.350,rs1972372,-0.308  
14,9.367,rs2792162,-0.305  
14,9.519,rs3939209,-0.240  
14,9.806,rs11850259,-0.243  
14,9.907,rs1953553,-0.255  
14,9.939,rs4981088,-0.259

14,9.980,rs6574474,-0.275  
14,10.323,rs11851081,-0.317  
14,10.325,rs8010116,-0.317  
14,10.703,rs3784244,-0.298  
14,11.168,rs1713456,-0.265  
14,11.254,rs2945461,-0.264  
14,11.320,rs1760898,-0.263  
14,11.342,rs1760897,-0.264  
14,11.472,rs945012,-0.274  
14,11.527,rs8017603,-0.274  
14,11.636,rs2275007,-0.281  
14,11.701,rs1760941,-0.308  
14,11.725,rs1713460,-0.347  
14,11.846,rs10498268,-0.395  
14,11.868,rs1760930,-0.438  
14,11.869,rs13379232,-0.438  
14,11.887,rs4981209,-0.485  
14,11.901,rs7161172,-0.441  
14,11.952,rs4982140,-0.508  
14,12.149,rs12586536,-0.534  
14,12.191,rs1243706,-0.540  
14,12.195,rs1243705,-0.519  
14,12.209,rs1243701,-0.519  
14,12.231,rs1243698,-0.520  
14,12.284,rs10498269,-0.518  
14,12.457,rs1243631,-0.546  
14,12.509,rs1243600,-0.533  
14,12.557,rs4981259,-0.498  
14,12.750,rs1243665,-0.411  
14,12.793,rs1243679,-0.402  
14,12.826,rs1243685,-0.389  
14,13.002,rs8003288,-0.412  
14,13.039,rs750142,-0.418  
14,13.205,rs8004382,-0.448  
14,13.277,rs17211649,-0.475  
14,13.347,rs1320482,-0.549  
14,13.410,rs4982347,-0.622  
14,13.439,rs2771324,-0.673  
14,13.619,rs2771354,-0.762  
14,13.695,rs1243459,-0.766  
14,13.721,rs1261795,-0.757  
14,13.752,rs1958032,-0.789  
14,13.771,rs4982394,-0.765  
14,13.818,rs4982401,-0.758  
14,13.858,rs1952151,-0.734  
14,13.995,rs4982411,-0.735  
14,14.041,rs10141637,-0.721  
14,14.046,rs9671842,-0.770  
14,14.052,rs943994,-0.713  
14,14.119,rs12893005,-0.874  
14,14.186,rs1887063,-0.799  
14,14.214,rs2319682,-0.760  
14,14.343,rs8006593,-0.665  
14,14.377,rs1243370,-0.653  
14,14.377,rs17102539,-0.653  
14,14.705,rs8009098,-0.601  
14,14.716,rs4982440,-0.600  
14,14.741,rs11848323,-0.562  
14,14.844,rs11628702,-0.574  
14,14.886,rs1263806,-0.529  
14,14.889,rs7148594,-0.538

14,14.892,rs3177954,-0.543  
14,14.895,rs1263811,-0.617  
14,14.896,rs2242529,-0.648  
14,14.902,rs2031063,-0.694  
14,14.909,rs1041856,-0.672  
14,14.932,rs4982462,-0.579  
14,14.939,rs10136774,-0.565  
14,14.965,rs13379427,-0.620  
14,14.978,rs12434436,-0.618  
14,15.007,rs8021892,-0.605  
14,15.016,rs6571990,-0.606  
14,15.081,rs4982495,-0.644  
14,15.082,rs12434054,-0.644  
14,15.153,rs2204955,-0.627  
14,15.210,rs733290,-0.585  
14,15.253,rs1040297,-0.597  
14,15.288,rs3811327,-0.613  
14,15.296,rs3827932,-0.568  
14,15.341,rs3811302,-0.581  
14,15.341,rs4982548,-0.582  
14,15.363,rs17183131,-0.592  
14,15.386,rs2178785,-0.600  
14,15.387,rs2272550,-0.599  
14,15.404,rs8016767,-0.602  
14,15.431,rs933193,-0.708  
14,15.610,rs2075496,-0.682  
14,15.696,rs6572331,-0.665  
14,15.796,rs9972232,-0.625  
14,15.877,rs10129606,-0.588  
14,15.916,rs12588739,-0.569  
14,15.927,rs722448,-0.564  
14,15.961,rs1540268,-0.617  
14,16.431,rs760019,-0.775  
14,16.689,rs2293732,-0.770  
14,16.691,rs1076861,-0.770  
14,16.740,rs227867,-0.802  
14,16.765,rs3751467,-0.781  
14,16.824,rs6572493,-0.769  
14,16.848,rs226999,-0.801  
14,16.849,rs1483973,-0.802  
14,16.856,rs12887424,-0.813  
14,17.029,rs438538,-0.843  
14,17.032,rs15795,-0.845  
14,17.037,rs1263663,-0.804  
14,17.277,rs1242927,-0.772  
14,17.353,rs6572605,-0.757  
14,17.391,rs1753430,-0.690  
14,17.641,rs7140697,-0.650  
14,17.945,rs873922,-0.626  
14,17.974,rs8572,-0.624  
14,18.009,rs12891079,-0.632  
14,18.019,rs17122346,-0.634  
14,18.022,rs4981439,-0.635  
14,18.023,rs8013531,-0.635  
14,18.025,rs1805061,-0.636  
14,18.030,rs11568429,-0.637  
14,18.034,rs7151065,-0.657  
14,18.183,rs2281678,-0.835  
14,18.201,rs7150444,-0.824  
14,18.248,rs3811188,-0.795  
14,18.493,rs8021159,-0.834

14,18.550,rs2295682,-0.839  
14,18.721,rs11543947,-0.805  
14,18.750,rs2295689,-0.792  
14,18.811,rs3751501,-0.806  
14,18.811,rs1885097,-0.806  
14,18.849,rs9972278,-0.834  
14,18.889,rs2239633,-0.860  
14,18.892,rs3759608,-0.860  
14,18.925,rs1015089,-0.809  
14,18.938,rs2331937,-0.800  
14,18.988,rs8013529,-0.764  
14,18.995,rs1884544,-0.758  
14,19.001,rs4982740,-0.755  
14,19.056,rs977870,-0.752  
14,19.104,rs1950252,-0.735  
14,19.172,rs8006357,-0.703  
14,19.179,rs365990,-0.698  
14,19.198,rs17794387,-0.658  
14,19.225,rs7149564,-0.611  
14,19.293,rs222674,-0.590  
14,19.294,rs12894083,-0.587  
14,19.317,rs3783439,-0.552  
14,19.334,rs12897422,-0.498  
14,19.358,rs222732,-0.433  
14,19.387,rs222717,-0.468  
14,19.408,rs17199254,-0.495  
14,19.410,rs17199261,-0.498  
14,19.454,rs2118499,-0.560  
14,19.482,rs12890058,-0.556  
14,19.516,rs9323367,-0.540  
14,19.533,rs10483282,-0.551  
14,19.576,rs10139382,-0.607  
14,19.582,rs7142855,-0.614  
14,19.665,rs12887581,-0.614  
14,19.668,rs8003627,-0.615  
14,19.759,rs4982851,-0.624  
14,19.765,rs10146906,-0.625  
14,19.769,rs2070344,-0.626  
14,19.778,rs3561,-0.627  
14,19.819,rs973639,-0.632  
14,19.972,rs2295322,-0.633  
14,20.049,rs2748516,-0.627  
14,20.144,rs17184682,-0.614  
14,20.226,rs3742517,-0.591  
14,20.280,rs8017377,-0.614  
14,20.286,rs3814811,-0.572  
14,20.287,rs13841,-0.606  
14,20.287,rs14076,-0.605  
14,20.311,rs10134603,-0.551  
14,20.368,rs17200068,-0.519  
14,20.607,rs8192920,-0.512  
14,20.682,rs8021801,-0.532  
14,20.777,rs10142572,-0.568  
14,20.778,rs1461650,-0.568  
14,20.845,rs17795538,-0.570  
14,20.872,rs7161311,-0.567  
14,20.923,rs854392,-0.578  
14,21.005,rs854324,-0.593  
14,21.087,rs3742523,-0.582  
14,21.239,rs2146918,-0.518  
14,21.285,rs11159001,-0.461

14,21.644,rs7147583,-0.445  
14,21.829,rs1241486,-0.423  
14,21.870,rs1241502,-0.418  
14,21.904,rs1241515,-0.496  
14,22.012,rs1551767,-0.490  
14,22.170,rs1461549,-0.469  
14,22.407,rs12885654,-0.458  
14,22.432,rs941737,-0.484  
14,22.440,rs12437015,-0.476  
14,22.507,rs10483300,-0.412  
14,22.513,rs7158255,-0.409  
14,22.562,rs11159347,-0.400  
14,22.578,rs1950427,-0.401  
14,22.800,rs11159411,-0.425  
14,22.815,rs1951054,-0.425  
14,22.822,rs1956773,-0.425  
14,22.878,rs7350731,-0.419  
14,22.916,rs7146825,-0.429  
14,22.917,rs2180818,-0.430  
14,22.918,rs12434794,-0.420  
14,22.923,rs10873327,-0.419  
14,22.985,rs1951039,-0.379  
14,23.334,rs12587685,-0.399  
14,23.375,rs17212261,-0.395  
14,23.413,rs1956613,-0.362  
14,23.422,rs7161376,-0.354  
14,23.425,rs10149378,-0.378  
14,23.425,rs1240986,-0.374  
14,23.426,rs1240988,-0.314  
14,23.435,rs12880493,-0.318  
14,23.473,rs10147093,-0.305  
14,23.494,rs17556380,-0.314  
14,23.517,rs11621043,-0.314  
14,23.561,rs12879388,-0.314  
14,23.589,rs715042,-0.346  
14,23.595,rs862966,-0.314  
14,23.705,rs10150971,-0.326  
14,23.756,rs2207243,-0.298  
14,23.762,rs10139118,-0.301  
14,23.799,rs7153823,-0.315  
14,23.843,rs17567957,-0.303  
14,23.848,rs17110787,-0.306  
14,23.854,rs10483312,-0.310  
14,23.906,rs962215,-0.340  
14,24.064,rs10133359,-0.385  
14,24.125,rs9323786,-0.395  
14,24.217,rs751401,-0.372  
14,24.222,rs1956496,-0.367  
14,24.230,rs10498286,-0.358  
14,24.234,rs7153926,-0.355  
14,24.273,rs10138090,-0.310  
14,24.298,rs10083361,-0.284  
14,24.298,rs1956828,-0.285  
14,24.300,rs11159983,-0.292  
14,24.308,rs990173,-0.315  
14,24.324,rs4127782,-0.323  
14,24.348,rs17095231,-0.340  
14,24.354,rs12433975,-0.345  
14,24.354,rs2019010,-0.299  
14,24.356,rs1950582,-0.299  
14,24.367,rs1951755,-0.290

14,24.369,rs8017862,-0.319  
14,24.375,rs2146628,-0.300  
14,24.392,rs1500447,-0.232  
14,24.394,rs1745722,-0.227  
14,24.407,rs2133829,-0.196  
14,24.407,rs2050528,-0.196  
14,24.411,rs202970,-0.246  
14,24.422,rs396419,-0.249  
14,24.441,rs1563526,-0.260  
14,24.488,rs2877847,-0.251  
14,24.568,rs4143693,-0.271  
14,24.630,rs17113241,-0.278  
14,24.647,rs10129626,-0.281  
14,24.648,rs11624431,-0.281  
14,24.697,rs2248160,-0.338  
14,24.699,rs1958748,-0.340  
14,24.721,rs17095485,-0.375  
14,24.823,rs17611471,-0.360  
14,24.867,rs9652408,-0.357  
14,24.945,rs2182035,-0.351  
14,25.056,rs1957950,-0.336  
14,25.223,rs1885147,-0.327  
14,25.247,rs2022715,-0.328  
14,25.255,rs11621151,-0.328  
14,25.279,rs7147576,-0.329  
14,25.322,rs8012543,-0.331  
14,25.384,rs1002750,-0.331  
14,25.406,rs723544,-0.326  
14,25.415,rs9671289,-0.328  
14,25.445,rs1955452,-0.333  
14,25.451,rs6576265,-0.330  
14,25.467,rs730195,-0.330  
14,25.782,rs1957478,-0.369  
14,25.888,rs12882217,-0.337  
14,25.960,rs1956228,-0.365  
14,26.226,rs4384523,-0.454  
14,26.312,rs1191571,-0.439  
14,26.361,rs1191555,-0.440  
14,26.411,rs17114947,-0.467  
14,26.432,rs1998355,-0.477  
14,26.547,rs6571317,-0.525  
14,26.778,rs17096078,-0.514  
14,26.847,rs8021375,-0.510  
14,27.074,rs12589992,-0.510  
14,27.110,rs2333660,-0.508  
14,27.581,rs1372050,-0.502  
14,27.817,rs9652310,-0.507  
14,27.848,rs1440985,-0.545  
14,27.860,rs417054,-0.546  
14,28.129,rs720761,-0.564  
14,28.141,rs17096362,-0.561  
14,28.150,rs10483380,-0.559  
14,28.170,rs12436395,-0.552  
14,28.230,rs7160082,-0.586  
14,28.242,rs1956980,-0.595  
14,28.351,rs765135,-0.682  
14,28.372,rs424964,-0.688  
14,28.779,rs7149414,-0.767  
14,28.783,rs179525,-0.743  
14,28.790,rs7159120,-0.745  
14,28.793,rs882270,-0.743

14,28.835,rs2819780,-0.720  
14,28.842,rs2213951,-0.724  
14,28.895,rs8007471,-0.824  
14,29.007,rs179660,-0.876  
14,29.066,rs2239580,-0.865  
14,29.082,rs10431648,-0.863  
14,29.350,rs2179932,-0.758  
14,29.673,rs4981820,-0.744  
14,30.789,rs1888576,-0.785  
14,31.348,rs7142881,-0.803  
14,31.610,rs4981115,-0.800  
14,32.217,rs10141540,-0.786  
14,32.347,rs1278881,-0.791  
14,32.401,rs1278911,-0.764  
14,32.413,rs1278918,-0.755  
14,32.451,rs2236532,-0.725  
14,32.480,rs4981938,-0.723  
14,32.516,rs1952966,-0.740  
14,32.587,rs7151842,-0.736  
14,32.658,rs1958912,-0.748  
14,32.778,rs17386030,-0.767  
14,32.831,rs17098491,-0.730  
14,32.833,rs1279002,-0.729  
14,33.243,rs4476082,-0.664  
14,33.311,rs17098557,-0.667  
14,33.487,rs7142879,-0.696  
14,33.665,rs1002822,-0.601  
14,33.694,rs2093577,-0.593  
14,33.759,rs17098767,-0.597  
14,33.862,rs1535541,-0.606  
14,33.887,rs7494316,-0.608  
14,33.896,rs7149078,-0.608  
14,33.913,rs942029,-0.604  
14,34.087,rs10135060,-0.584  
14,34.088,rs8014419,-0.583  
14,34.089,rs8015624,-0.583  
14,34.109,rs2383302,-0.581  
14,34.250,rs1111692,-0.591  
14,34.278,rs721538,-0.595  
14,34.318,rs2145584,-0.619  
14,34.367,rs8010040,-0.643  
14,34.557,rs8012268,-0.709  
14,34.559,rs11846766,-0.709  
14,34.794,rs3825753,-0.619  
14,35.022,rs1884622,-0.526  
14,35.123,rs17439529,-0.506  
14,35.194,rs2300830,-0.532  
14,35.259,rs1955505,-0.555  
14,35.347,rs11622943,-0.598  
14,35.472,rs1950213,-0.616  
14,35.540,rs4261436,-0.593  
14,35.681,rs1955490,-0.549  
14,35.787,rs10134619,-0.494  
14,35.800,rs4982022,-0.487  
14,35.815,rs6571572,-0.483  
14,35.844,rs1956007,-0.500  
14,36.055,rs2383414,-0.471  
14,36.058,rs10143478,-0.471  
14,36.174,rs7157953,-0.508  
14,36.302,rs8014371,-0.592  
14,36.372,rs12436002,-0.689

14,36.380,rs2383436,-0.723  
14,36.391,rs7145093,-0.753  
14,36.411,rs974002,-0.793  
14,36.427,rs8007241,-0.835  
14,36.428,rs10137028,-0.839  
14,36.430,rs1279312,-0.844  
14,36.437,rs7157155,-0.848  
14,36.459,rs11628634,-0.821  
14,36.476,rs1958005,-0.853  
14,36.487,rs912855,-0.874  
14,36.521,rs4982062,-0.874  
14,36.539,rs2768837,-0.872  
14,36.566,rs243308,-0.873  
14,36.619,rs1886781,-0.874  
14,36.843,rs1952302,-0.879  
14,36.874,rs1111533,-0.879  
14,37.075,rs1315141,-0.856  
14,37.077,rs7151675,-0.858  
14,37.110,rs2274512,-0.882  
14,37.118,rs1315131,-0.883  
14,37.165,rs1315128,-0.838  
14,37.256,rs1303470,-0.933  
14,37.361,rs17101124,-1.007  
14,37.372,rs8018440,-1.012  
14,37.383,rs12897109,-1.023  
14,37.386,rs10134359,-1.019  
14,37.397,rs1440197,-1.003  
14,37.414,rs7159209,-0.986  
14,37.419,rs1951383,-0.920  
14,37.510,rs10132198,-0.996  
14,37.513,rs4981194,-0.999  
14,37.650,rs3949783,-1.130  
14,37.664,rs4619305,-1.122  
14,37.673,rs7143076,-1.083  
14,37.692,rs10134006,-0.988  
14,37.699,rs2149833,-0.993  
14,37.867,rs7143066,-1.085  
14,37.922,rs8018599,-1.156  
14,37.946,rs871609,-1.156  
14,37.963,rs17408765,-1.154  
14,37.972,rs4283129,-1.158  
14,37.994,rs944086,-1.115  
14,38.029,rs17101778,-1.125  
14,38.037,rs8016849,-1.128  
14,38.073,rs8006749,-1.105  
14,38.120,rs8020167,-1.059  
14,38.121,rs797352,-0.871  
14,38.121,rs797351,-0.862  
14,38.122,rs4981220,-0.890  
14,38.123,rs4982145,-0.968  
14,38.124,rs712285,-0.988  
14,38.127,rs10148562,-0.996  
14,38.129,rs1244345,-1.003  
14,38.129,rs1244376,-1.004  
14,38.129,rs1431062,-1.004  
14,38.130,rs1244370,-1.009  
14,38.200,rs7148400,-0.940  
14,38.255,rs1712355,-1.005  
14,38.335,rs799664,-1.064  
14,38.559,rs7147346,-1.166  
14,39.217,rs8016947,-1.230



14,39.258,rs1951276,-1.209  
14,39.276,rs7152826,-1.177  
14,39.306,rs3138045,-1.079  
14,39.343,rs10483453,-1.016  
14,39.351,rs10140560,-1.004  
14,39.407,rs1185837,-0.957  
14,39.470,rs9322955,-0.957  
14,39.508,rs2274068,-0.966  
14,39.516,rs7155504,-0.969  
14,39.663,rs1169030,-1.016  
14,39.815,rs17103608,-1.068  
14,39.931,rs17103684,-1.161  
14,40.006,rs847499,-1.192  
14,40.012,rs12432424,-1.136  
14,40.134,rs7147401,-1.170  
14,40.396,rs2761336,-1.144  
14,40.401,rs2553571,-1.142  
14,40.404,rs2787431,-1.141  
14,40.427,rs8018390,-1.139  
14,40.511,rs1535722,-1.169  
14,40.623,rs12147399,-1.183  
14,40.675,rs10483465,-1.201  
14,40.724,rs12436124,-1.234  
14,40.828,rs1951167,-1.270  
14,40.963,rs2207533,-1.273  
14,41.014,rs2073241,-1.282  
14,41.049,rs17105005,-1.281  
14,41.052,rs1884217,-1.280  
14,41.087,rs2064546,-1.302  
14,41.092,rs1884219,-1.297  
14,41.109,rs8009041,-1.270  
14,41.142,rs1033594,-1.326  
14,41.164,rs1325533,-1.349  
14,41.198,rs848124,-1.367  
14,41.274,rs1925685,-1.459  
14,41.275,rs10131807,-1.459  
14,41.307,rs848049,-1.502  
14,41.321,rs7144374,-1.520  
14,41.321,rs848048,-1.520  
14,41.326,rs1325530,-1.519  
14,41.357,rs2022106,-1.519  
14,41.420,rs861928,-1.484  
14,41.427,rs7159241,-1.484  
14,41.465,rs10130699,-1.480  
14,41.480,rs7150942,-1.558  
14,41.491,rs17767350,-1.582  
14,41.504,rs9322971,-1.615  
14,41.735,rs1950372,-1.882  
14,41.887,rs1569899,-2.043  
14,42.144,rs1951646,-2.186  
14,42.198,rs6571820,-2.132  
14,42.228,rs17179497,-2.120  
14,42.243,rs8018889,-2.135  
14,42.286,rs1952790,-2.170  
14,42.327,rs1952786,-2.212  
14,42.388,rs10498333,-2.263  
14,42.391,rs4146557,-2.265  
14,42.416,rs17107486,-2.266  
14,42.419,rs7159917,-2.266  
14,42.428,rs12147019,-2.249  
14,42.429,rs4901596,-2.245

14,42.456,rs2812086,-2.151  
14,42.459,rs2250334,-2.148  
14,42.469,rs11628551,-2.044  
14,42.476,rs1028930,-1.961  
14,42.477,rs1958488,-1.955  
14,42.477,rs2812031,-1.956  
14,42.478,rs951136,-1.960  
14,42.480,rs10145633,-1.972  
14,42.491,rs1556700,-2.120  
14,42.534,rs1168555,-2.208  
14,42.582,rs8003056,-2.293  
14,42.593,rs11847817,-2.308  
14,42.650,rs11622000,-2.444  
14,42.684,rs4432172,-2.456  
14,42.700,rs8182000,-2.458  
14,42.727,rs979002,-2.421  
14,42.797,rs3742354,-2.367  
14,42.867,rs9322996,-2.289  
14,43.021,rs175677,-2.035  
14,43.089,rs9323003,-1.952  
14,43.099,rs1958958,-1.965  
14,43.113,rs17780306,-1.976  
14,43.115,rs1953200,-1.979  
14,43.131,rs4903057,-1.913  
14,43.148,rs1957198,-1.815  
14,43.278,rs7158539,-1.804  
14,43.331,rs10134152,-1.696  
14,43.354,rs4903832,-1.692  
14,43.363,rs9323025,-1.688  
14,43.388,rs8005565,-1.727  
14,43.392,rs17781119,-1.733  
14,43.463,rs8017390,-1.593  
14,43.468,rs17665297,-1.590  
14,43.495,rs12886510,-1.596  
14,43.510,rs17616128,-1.661  
14,43.580,rs11157247,-1.715  
14,43.587,rs10149831,-1.722  
14,43.590,rs17112218,-1.719  
14,43.650,rs912384,-1.660  
14,43.697,rs945316,-1.667  
14,43.765,rs17112672,-1.605  
14,43.804,rs10498365,-1.567  
14,43.811,rs1393835,-1.572  
14,43.847,rs961015,-1.353  
14,43.869,rs2247407,-1.340  
14,43.936,rs4346126,-1.395  
14,43.944,rs7156273,-1.395  
14,43.986,rs10150101,-1.427  
14,43.990,rs1777096,-1.405  
14,44.000,rs1627411,-1.353  
14,44.006,rs6572168,-1.335  
14,44.035,rs6572182,-1.211  
14,44.037,rs2044747,-1.242  
14,44.048,rs7146781,-1.242  
14,44.227,rs12590884,-1.156  
14,44.230,rs8005238,-1.150  
14,44.260,rs12432613,-1.170  
14,44.309,rs2185359,-1.146  
14,44.382,rs11157362,-1.103  
14,44.475,rs17114446,-1.072  
14,44.476,rs7154595,-1.072

14,44.548,rs1951560,-1.041  
14,44.565,rs10141817,-1.039  
14,44.600,rs1955969,-1.007  
14,44.618,rs17114690,-1.020  
14,44.636,rs8013483,-1.025  
14,44.661,rs11848593,-0.969  
14,44.665,rs7157808,-0.911  
14,44.720,rs8004854,-0.868  
14,44.805,rs12433092,-0.795  
14,44.812,rs17627259,-0.790  
14,44.909,rs10152023,-0.813  
14,44.947,rs4399472,-0.815  
14,45.021,rs11157457,-0.944  
14,45.120,rs1958149,-0.907  
14,45.212,rs10140681,-0.879  
14,45.420,rs858893,-0.728  
14,45.458,rs8006944,-0.701  
14,45.575,rs12893532,-0.702  
14,45.589,rs1954233,-0.687  
14,45.594,rs17117834,-0.697  
14,45.598,rs2066309,-0.705  
14,45.601,rs10134041,-0.712  
14,45.616,rs8016110,-0.693  
14,45.627,rs12050092,-0.654  
14,45.787,rs1952212,-0.659  
14,45.882,rs8009848,-0.724  
14,46.026,rs1958628,-0.781  
14,46.060,rs8003717,-0.654  
14,46.064,rs1959775,-0.588  
14,46.084,rs10149330,-0.556  
14,46.130,rs7147386,-0.515  
14,46.151,rs12896750,-0.505  
14,46.162,rs1371793,-0.504  
14,46.193,rs10140519,-0.499  
14,46.249,rs10135893,-0.516  
14,46.286,rs4243557,-0.528  
14,46.303,rs10498406,-0.497  
14,46.374,rs1959573,-0.467  
14,46.380,rs946626,-0.464  
14,46.412,rs8017802,-0.458  
14,46.497,rs2585390,-0.474  
14,46.562,rs4526940,-0.485  
14,46.679,rs2352907,-0.490  
14,46.760,rs1956101,-0.491  
14,46.891,rs971676,-0.463  
14,47.175,rs6572562,-0.408  
14,47.395,rs4900914,-0.382  
14,47.441,rs1530947,-0.367  
14,47.526,rs11622841,-0.339  
14,47.571,rs4898626,-0.295  
14,48.063,rs3126184,-0.261  
14,48.113,rs7159113,-0.248  
14,48.166,rs8003924,-0.221  
14,48.210,rs6572635,-0.205  
14,48.243,rs12437060,-0.187  
14,48.258,rs2281530,-0.180  
14,48.336,rs7155622,-0.199  
14,48.786,rs4901030,-0.200  
14,49.092,rs3015452,-0.195  
14,49.249,rs6572692,-0.174  
14,49.351,rs7143959,-0.250

14,49.380,rs12893300,-0.222  
14,49.392,rs6650505,-0.212  
14,49.468,rs2027343,-0.169  
14,49.472,rs7143869,-0.174  
14,49.487,rs1953879,-0.148  
14,49.493,rs1547763,-0.166  
14,49.495,rs17793937,-0.170  
14,49.543,rs8004788,-0.190  
14,49.598,rs1538615,-0.216  
14,49.617,rs949633,-0.224  
14,49.648,rs4901069,-0.213  
14,49.681,rs11847331,-0.206  
14,49.689,rs1953888,-0.205  
14,49.715,rs7147946,-0.200  
14,49.779,rs4243569,-0.191  
14,49.834,rs7148539,-0.145  
14,49.848,rs7149337,-0.153  
14,49.858,rs4526942,-0.166  
14,49.867,rs7142110,-0.175  
14,49.869,rs8013182,-0.191  
14,49.872,rs11629344,-0.210  
14,49.877,rs1987118,-0.219  
14,49.877,rs4901119,-0.221  
14,49.880,rs17831163,-0.220  
14,49.888,rs7158425,-0.224  
14,49.902,rs8022389,-0.248  
14,49.905,rs11844403,-0.251  
14,49.909,rs2064923,-0.256  
14,49.911,rs1950935,-0.247  
14,49.911,rs4898698,-0.244  
14,49.913,rs1956588,-0.260  
14,49.913,rs11627579,-0.224  
14,49.918,rs11626565,-0.212  
14,49.919,rs2357112,-0.163  
14,49.919,rs17588609,-0.163  
14,49.919,rs10484085,-0.176  
14,49.929,rs6572783,-0.182  
14,49.943,rs7153066,-0.215  
14,49.950,rs11157849,-0.245  
14,49.957,rs1014158,-0.263  
14,49.965,rs2993998,-0.262  
14,49.975,rs11157866,-0.269  
14,49.976,rs4898725,-0.268  
14,49.977,rs1693198,-0.269  
14,49.980,rs1253698,-0.270  
14,49.986,rs1253660,-0.271  
14,50.059,rs1151579,-0.293  
14,50.146,rs2645737,-0.273  
14,50.255,rs941630,-0.260  
14,50.351,rs4901201,-0.256  
14,50.472,rs8019150,-0.228  
14,50.481,rs11851721,-0.226  
14,50.567,rs802994,-0.235  
14,50.606,rs803002,-0.240  
14,50.742,rs7161576,-0.231  
14,50.790,rs1254600,-0.229  
14,50.906,rs2145957,-0.229  
14,50.962,rs10144981,-0.234  
14,51.018,rs10483614,-0.240  
14,51.098,rs8004624,-0.248  
14,51.434,rs1570878,-0.314

14,51.572,rs7153163,-0.396  
14,51.577,rs12589633,-0.397  
14,51.627,rs12897244,-0.412  
14,51.632,rs2150541,-0.414  
14,52.175,rs2161944,-0.435  
14,52.282,rs17126349,-0.435  
14,52.376,rs17126432,-0.434  
14,52.404,rs1959839,-0.437  
14,52.476,rs11622595,-0.446  
14,52.737,rs4901431,-0.557  
14,52.739,rs17093060,-0.556  
14,52.806,rs2245007,-0.507  
14,52.975,rs1380131,-0.473  
14,53.049,rs8020341,-0.467  
14,53.092,rs210321,-0.462  
14,53.251,rs210343,-0.458  
14,53.453,rs8017615,-0.427  
14,53.489,rs2150279,-0.416  
14,53.500,rs17126953,-0.404  
14,53.534,rs4898812,-0.367  
14,53.673,rs4901458,-0.418  
14,53.819,rs8018146,-0.438  
14,53.837,rs11625439,-0.442  
14,54.032,rs1957860,-0.486  
14,54.097,rs4901474,-0.527  
14,54.277,rs932683,-0.530  
14,54.337,rs10134051,-0.529  
14,54.468,rs10483636,-0.526  
14,54.472,rs10150369,-0.526  
14,54.512,rs1950202,-0.534  
14,54.641,rs8015391,-0.545  
14,54.745,rs1187586,-0.486  
14,54.750,rs1211769,-0.481  
14,54.811,rs10140484,-0.419  
14,54.811,rs3742560,-0.419  
14,54.812,rs3742562,-0.425  
14,54.839,rs4898845,-0.352  
14,54.845,rs2181050,-0.387  
14,54.871,rs7157453,-0.448  
14,54.879,rs2273742,-0.423  
14,54.883,rs4898847,-0.423  
14,54.895,rs11628843,-0.468  
14,54.913,rs4901533,-0.425  
14,54.919,rs7156891,-0.422  
14,54.930,rs7143004,-0.425  
14,54.957,rs7143189,-0.442  
14,55.255,rs11849961,-0.409  
14,55.883,rs10220441,-0.324  
14,56.161,rs998871,-0.297  
14,56.709,rs1953352,-0.255  
14,56.778,rs8014482,-0.230  
14,56.903,rs4901602,-0.234  
14,57.091,rs11628156,-0.224  
14,57.174,rs8018542,-0.187  
14,57.229,rs2183628,-0.198  
14,57.260,rs8020688,-0.203  
14,57.376,rs1188183,-0.174  
14,57.550,rs241541,-0.152  
14,57.586,rs1152455,-0.152  
14,57.596,rs398652,-0.152  
14,57.640,rs395643,-0.152

14,57.683,rs7160120,-0.156  
14,57.846,rs11158077,-0.180  
14,58.156,rs242584,-0.236  
14,58.209,rs1188692,-0.209  
14,58.242,rs1152505,-0.199  
14,58.283,rs1834805,-0.225  
14,58.301,rs1189136,-0.231  
14,58.337,rs1300662,-0.234  
14,58.363,rs1189281,-0.184  
14,58.367,rs17772793,-0.190  
14,58.369,rs1890905,-0.191  
14,58.373,rs12893562,-0.197  
14,58.382,rs4901693,-0.162  
14,58.390,rs1959056,-0.157  
14,58.398,rs1959055,-0.138  
14,58.450,rs11628364,-0.101  
14,58.453,rs11158120,-0.100  
14,58.511,rs1041316,-0.092  
14,58.542,rs2094694,-0.077  
14,58.583,rs6573103,-0.073  
14,58.584,rs198256,-0.071  
14,58.589,rs1483109,-0.060  
14,58.590,rs1483111,-0.060  
14,58.597,rs198247,-0.063  
14,58.604,rs6573104,-0.066  
14,58.622,rs1754751,-0.068  
14,58.643,rs198223,-0.070  
14,58.685,rs928110,-0.062  
14,58.689,rs198262,-0.062  
14,58.727,rs10483677,-0.065  
14,58.784,rs850274,-0.069  
14,58.855,rs17719756,-0.074  
14,58.858,rs4901746,-0.069  
14,58.863,rs1027728,-0.062  
14,58.920,rs1189821,-0.068  
14,58.999,rs4901766,-0.073  
14,59.126,rs6573142,-0.070  
14,59.309,rs1495471,-0.061  
14,59.414,rs7156976,-0.066  
14,59.431,rs17723597,-0.081  
14,59.440,rs12896156,-0.087  
14,59.480,rs12898168,-0.085  
14,59.524,rs10431700,-0.097  
14,59.555,rs11158170,-0.100  
14,59.601,rs8014539,-0.106  
14,59.641,rs1951004,-0.116  
14,59.781,rs878085,-0.116  
14,59.820,rs1028458,-0.099  
14,59.827,rs808208,-0.096  
14,59.866,rs2223934,-0.109  
14,59.898,rs178488,-0.113  
14,59.975,rs3829765,-0.130  
14,59.976,rs12100853,-0.130  
14,59.993,rs17094383,-0.137  
14,60.106,rs3783694,-0.183  
14,60.146,rs160459,-0.172  
14,60.148,rs11850518,-0.170  
14,60.160,rs160475,-0.181  
14,60.160,rs311840,-0.157  
14,60.166,rs311824,-0.158  
14,60.173,rs2651256,-0.165

14,60.177,rs311871,-0.168  
14,60.186,rs856221,-0.159  
14,60.208,rs2114618,-0.177  
14,60.210,rs380978,-0.174  
14,60.217,rs85425,-0.177  
14,60.227,rs17095466,-0.184  
14,60.229,rs2180426,-0.184  
14,60.230,rs1950666,-0.183  
14,60.232,rs8007404,-0.182  
14,60.256,rs3759704,-0.165  
14,60.280,rs1252992,-0.176  
14,60.280,rs8016570,-0.176  
14,60.296,rs17093314,-0.179  
14,60.301,rs17255814,-0.180  
14,60.303,rs12433783,-0.180  
14,60.348,rs7154819,-0.213  
14,60.351,rs11848964,-0.215  
14,60.406,rs10138713,-0.217  
14,60.417,rs1957982,-0.218  
14,60.701,rs216504,-0.230  
14,60.702,rs8015798,-0.230  
14,60.809,rs2350890,-0.253  
14,61.493,rs7152640,-0.249  
14,61.607,rs11623261,-0.209  
14,61.638,rs4902033,-0.206  
14,61.647,rs12147034,-0.232  
14,61.651,rs12436103,-0.230  
14,61.683,rs17098135,-0.216  
14,61.717,rs11158335,-0.200  
14,61.809,rs7151034,-0.171  
14,61.845,rs3742633,-0.161  
14,61.861,rs767757,-0.156  
14,61.968,rs2252267,-0.106  
14,61.987,rs1088672,-0.110  
14,62.046,rs2249106,-0.071  
14,62.084,rs710063,-0.057  
14,62.097,rs11844065,-0.053  
14,62.214,rs6573400,-0.023  
14,62.363,rs170098,-0.016  
14,62.373,rs11625130,-0.015  
14,62.422,rs11629169,-0.014  
14,62.529,rs17735026,-0.016  
14,62.536,rs2226206,-0.017  
14,62.549,rs10150174,-0.017  
14,62.554,rs1954491,-0.017  
14,62.634,rs8006839,-0.014  
14,62.726,rs4902119,-0.008  
14,62.748,rs12588013,-0.003  
14,63.011,rs1954568,-0.002  
14,63.047,rs7150844,-0.002  
14,63.065,rs2000250,-0.003  
14,63.128,rs9788478,-0.005  
14,63.142,rs4902165,-0.010  
14,63.145,rs10483749,-0.010  
14,63.162,rs1602208,-0.008  
14,63.201,rs8020132,-0.011  
14,63.213,rs12436815,-0.013  
14,63.227,rs17100383,-0.013  
14,63.324,rs1255504,-0.011  
14,63.359,rs17100629,-0.009  
14,63.471,rs4902214,-0.003

14,63.498,rs2144112,-0.002  
14,63.694,rs2012961,-0.005  
14,63.738,rs10483770,-0.006  
14,63.803,rs728525,-0.008  
14,63.850,rs12432261,-0.009  
14,64.222,rs945029,-0.020  
14,64.225,rs12884607,-0.020  
14,64.487,rs9323444,-0.013  
14,64.557,rs1029145,-0.014  
14,64.583,rs7144688,-0.014  
14,65.013,rs2987969,-0.012  
14,65.053,rs10498514,-0.012  
14,65.613,rs4902307,-0.004  
14,65.773,rs2295522,-0.002  
14,65.824,rs1695777,-0.002  
14,65.861,rs229591,-0.001  
14,65.912,rs17826201,-0.001  
14,65.935,rs229617,-0.000  
14,66.283,rs2296322,0.000  
14,66.288,rs2296316,0.001  
14,66.300,rs11622328,0.002  
14,66.301,rs737523,0.003  
14,66.365,rs8007846,0.032  
14,66.366,rs3924222,0.030  
14,66.368,rs7494064,0.021  
14,66.369,rs7493793,0.015  
14,66.370,rs4131564,0.016  
14,66.375,rs2022841,0.021  
14,66.379,rs1954610,0.023  
14,66.385,rs1147450,0.037  
14,66.391,rs1273868,0.041  
14,66.475,rs7156426,0.029  
14,66.491,rs1077989,0.031  
14,66.539,rs17249216,0.044  
14,66.641,rs1465118,0.070  
14,66.666,rs11158685,0.074  
14,66.683,rs17249299,0.077  
14,66.726,rs8007199,0.081  
14,66.852,rs742869,0.059  
14,67.170,rs3742883,0.051  
14,67.212,rs2295109,0.050  
14,67.272,rs181575,0.047  
14,67.931,rs4902562,0.041  
14,67.936,rs1957572,0.041  
14,68.073,rs8014025,0.041  
14,68.094,rs729138,0.043  
14,68.102,rs9323508,0.043  
14,68.117,rs1570107,0.032  
14,68.180,rs174213,0.038  
14,68.198,rs412638,0.033  
14,68.209,rs17106449,0.028  
14,68.210,rs181455,0.027  
14,68.240,rs3742888,0.034  
14,68.255,rs723113,0.038  
14,68.270,rs10136833,0.040  
14,68.292,rs2268974,0.039  
14,68.298,rs2268968,0.042  
14,68.315,rs1007407,0.052  
14,68.338,rs12147311,0.050  
14,68.674,rs4902710,0.037  
14,68.713,rs1147474,0.037



14,68.722,rs2274442,0.037  
14,68.752,rs11622064,0.038  
14,68.834,rs12884741,0.039  
14,68.925,rs1466255,0.040  
14,69.217,rs8015709,0.011  
14,69.270,rs7153985,0.007  
14,69.280,rs17107425,0.018  
14,69.299,rs1276120,0.023  
14,69.335,rs10142893,0.038  
14,69.361,rs61305,0.044  
14,69.425,rs12435978,0.043  
14,69.437,rs150951,0.042  
14,69.448,rs2169074,0.043  
14,69.540,rs8014714,0.054  
14,69.551,rs4899333,0.054  
14,69.591,rs8020127,0.041  
14,69.734,rs3759774,0.039  
14,70.023,rs10147181,0.053  
14,70.039,rs1205236,0.051  
14,70.049,rs8688,0.065  
14,70.128,rs11622989,0.073  
14,70.217,rs12884068,0.072  
14,70.256,rs12589331,0.086  
14,70.259,rs2526889,0.087  
14,70.469,rs11622673,0.046  
14,70.506,rs221917,0.051  
14,70.514,rs221905,0.055  
14,70.613,rs12896453,0.067  
14,70.625,rs1000449,0.068  
14,70.655,rs11623996,0.070  
14,70.746,rs41227,0.079  
14,71.433,rs1204982,0.104  
14,71.762,rs2533059,0.086  
14,71.867,rs1205060,0.087  
14,71.871,rs36424,0.087  
14,71.912,rs1205044,0.091  
14,71.972,rs36341,0.096  
14,72.004,rs2238273,0.100  
14,72.004,rs764624,0.100  
14,72.020,rs8021249,0.102  
14,72.021,rs8022882,0.102  
14,72.033,rs36740,0.111  
14,72.053,rs12883161,0.149  
14,72.087,rs149689,0.143  
14,72.101,rs17179877,0.141  
14,72.108,rs193548,0.140  
14,72.110,rs185010,0.140  
14,72.117,rs17109092,0.134  
14,72.148,rs847342,0.108  
14,72.187,rs2681728,0.078  
14,72.234,rs2238190,0.054  
14,72.265,rs4903027,0.039  
14,72.292,rs2239222,0.040  
14,72.302,rs3742843,0.040  
14,72.305,rs10146857,0.040  
14,72.308,rs7150135,0.040  
14,72.318,rs7492545,0.045  
14,72.346,rs917069,0.053  
14,72.366,rs2526910,0.055  
14,72.370,rs7159986,0.056  
14,72.382,rs11158973,0.059

14,72.402,rs17120302,0.043  
14,72.412,rs11622224,0.035  
14,72.413,rs3814864,0.034  
14,72.415,rs12931,0.033  
14,72.418,rs1990059,0.033  
14,72.529,rs17182237,0.031  
14,72.544,rs11845125,0.031  
14,72.583,rs177378,0.032  
14,72.650,rs17126867,0.025  
14,72.935,rs1014087,0.032  
14,72.992,rs6574129,0.034  
14,73.001,rs12891009,0.034  
14,73.003,rs17128968,0.034  
14,73.011,rs42923,0.034  
14,73.276,rs7158118,0.027  
14,73.436,rs2286425,0.034  
14,73.773,rs1003907,0.063  
14,73.809,rs8009761,0.050  
14,73.959,rs3815329,0.086  
14,74.034,rs2196861,0.080  
14,74.080,rs10146172,0.064  
14,74.093,rs8014087,0.060  
14,74.726,rs2268613,0.073  
14,74.806,rs8014403,0.074  
14,75.005,rs10146482,0.073  
14,75.189,rs8004504,0.069  
14,75.192,rs17103080,0.069  
14,75.213,rs6574213,0.069  
14,75.234,rs8013918,0.054  
14,75.276,rs8004059,0.055  
14,75.317,rs3742768,0.062  
14,75.332,rs8021524,0.070  
14,75.356,rs11159135,0.084  
14,75.358,rs17103133,0.092  
14,75.360,rs760247,0.098  
14,75.360,rs2005292,0.122  
14,75.364,rs11159136,0.120  
14,75.378,rs10151713,0.115  
14,75.388,rs12879500,0.111  
14,75.439,rs10483865,0.087  
14,75.449,rs6574227,0.081  
14,75.529,rs4899563,0.048  
14,75.560,rs10483867,0.033  
14,75.594,rs7146899,0.019  
14,75.635,rs6574236,0.022  
14,75.635,rs6574237,0.022  
14,75.638,rs7153685,0.022  
14,75.653,rs12147331,0.022  
14,75.693,rs175714,0.022  
14,75.793,rs10483869,0.026  
14,75.799,rs7159570,0.026  
14,75.950,rs12432793,0.016  
14,76.529,rs175896,0.020  
14,76.995,rs2205181,0.018  
14,77.364,rs11159173,0.016  
14,77.431,rs2543361,0.012  
14,77.475,rs17104278,0.011  
14,77.478,rs951304,0.011  
14,77.483,rs4899587,0.011  
14,77.495,rs4522353,0.010  
14,77.507,rs4903399,0.015

14,77.511,rs11622068,0.010  
14,77.539,rs4344663,0.022  
14,77.539,rs17104397,0.015  
14,77.560,rs2361287,0.036  
14,77.564,rs12435564,0.052  
14,77.575,rs1867655,0.067  
14,77.576,rs2921451,0.068  
14,77.580,rs10147732,0.075  
14,77.587,rs3813545,0.109  
14,77.593,rs17583842,0.132  
14,77.597,rs1676303,0.136  
14,77.603,rs2860216,0.137  
14,77.604,rs2927288,0.137  
14,77.625,rs1642818,0.140  
14,77.627,rs1642820,0.141  
14,77.636,rs4142175,0.139  
14,77.659,rs10483875,0.135  
14,77.715,rs11626491,0.118  
14,77.719,rs17735651,0.118  
14,77.720,rs12589778,0.118  
14,77.784,rs8003586,0.101  
14,77.786,rs11629409,0.116  
14,77.787,rs17104945,0.113  
14,77.796,rs7160583,0.116  
14,77.842,rs2363506,0.086  
14,77.846,rs4899628,0.086  
14,77.878,rs7151589,0.091  
14,77.896,rs10431632,0.089  
14,77.987,rs3813543,0.062  
14,78.014,rs1396239,0.055  
14,78.038,rs8016340,0.041  
14,78.083,rs8018063,0.029  
14,78.095,rs1911728,0.027  
14,78.146,rs391966,0.024  
14,78.209,rs6574363,0.013  
14,78.215,rs11624564,0.012  
14,78.249,rs3783986,0.012  
14,78.318,rs3759732,0.013  
14,78.535,rs7142380,0.013  
14,78.668,rs11159273,0.010  
14,78.700,rs2364602,0.009  
14,78.855,rs2886123,0.007  
14,79.293,rs2364748,0.008  
14,79.300,rs8006523,0.008  
14,79.367,rs4903675,0.009  
14,79.377,rs12434238,0.014  
14,79.554,rs2365350,0.012  
14,79.598,rs8020238,0.012  
14,79.624,rs177171,0.018  
14,79.691,rs1541616,0.012  
14,79.709,rs10483892,0.011  
14,79.749,rs213569,0.009  
14,79.805,rs2178863,0.007  
14,79.816,rs10141201,0.007  
14,79.978,rs17107326,0.006  
14,80.009,rs214000,0.006  
14,80.141,rs8008554,0.013  
14,80.150,rs1124299,0.014  
14,80.322,rs741523,0.025  
14,80.331,rs2370825,0.025  
14,80.371,rs6574460,0.025

14,80.421,rs4903794,0.018  
14,80.427,rs10142370,0.017  
14,80.429,rs17108195,0.017  
14,80.431,rs929920,0.017  
14,80.504,rs150786,0.012  
14,80.534,rs31434,0.009  
14,80.539,rs17835920,0.009  
14,80.544,rs2270964,0.008  
14,80.604,rs7143117,0.002  
14,80.630,rs6574495,0.000  
14,80.666,rs7141906,0.000  
14,80.673,rs10133101,-0.000  
14,80.689,rs2887896,-0.000  
14,80.755,rs12895906,-0.002  
14,80.788,rs7141420,0.000  
14,80.877,rs221430,-0.001  
14,80.928,rs11159412,-0.001  
14,80.933,rs1861957,-0.001  
14,80.940,rs2215839,-0.001  
14,80.959,rs8016688,-0.002  
14,80.974,rs10134488,-0.002  
14,80.993,rs2242645,-0.002  
14,80.997,rs2293823,-0.002  
14,81.008,rs17109935,-0.000  
14,81.013,rs2293847,-0.000  
14,81.023,rs2064005,-0.000  
14,81.042,rs7154805,-0.000  
14,81.060,rs10483939,-0.003  
14,81.172,rs224980,-0.002  
14,81.247,rs2273173,-0.007  
14,81.288,rs12882445,-0.011  
14,81.291,rs9323685,-0.011  
14,81.301,rs11159460,-0.012  
14,81.314,rs7144237,-0.012  
14,81.323,rs10129556,-0.012  
14,81.331,rs17600960,-0.011  
14,81.377,rs10140829,-0.008  
14,81.808,rs3783949,-0.015  
14,81.823,rs917986,-0.016  
14,81.831,rs12883673,-0.015  
14,81.842,rs2300525,-0.014  
14,81.899,rs917984,-0.010  
14,81.916,rs1957547,-0.005  
14,81.939,rs1864167,-0.002  
14,82.038,rs6574644,-0.003  
14,82.044,rs3109610,-0.003  
14,82.110,rs12888000,-0.001  
14,82.145,rs7148568,-0.000  
14,82.159,rs2236179,0.000  
14,82.222,rs17115605,0.008  
14,82.233,rs2208780,0.012  
14,82.252,rs9323707,0.015  
14,82.365,rs1571378,0.033  
14,82.393,rs10141409,0.037  
14,82.406,rs17116019,0.037  
14,82.435,rs4904036,0.037  
14,82.456,rs2371982,0.037  
14,82.502,rs12588669,0.039  
14,82.510,rs11624992,0.039  
14,82.515,rs8006798,0.041  
14,82.532,rs10149996,0.045

14,82.547,rs11626456,0.046  
14,82.569,rs1430477,0.053  
14,82.586,rs1652593,0.039  
14,82.613,rs12883722,0.038  
14,82.633,rs765614,0.044  
14,82.639,rs17116436,0.045  
14,82.641,rs1958664,0.045  
14,82.657,rs799121,0.050  
14,82.719,rs10483957,0.049  
14,82.754,rs1211307,0.044  
14,82.838,rs2689117,0.051  
14,82.851,rs17678072,0.041  
14,82.884,rs1152349,0.039  
14,82.887,rs1370762,0.039  
14,82.888,rs2039478,0.039  
14,82.916,rs7153719,0.044  
14,82.921,rs7145839,0.069  
14,82.938,rs1959010,0.048  
14,82.942,rs17117498,0.047  
14,82.945,rs17676330,0.046  
14,82.946,rs17117532,0.046  
14,82.958,rs10137321,0.048  
14,82.969,rs7157907,0.050  
14,82.975,rs17117690,0.052  
14,82.978,rs12889310,0.054  
14,82.999,rs1954074,0.063  
14,83.017,rs1263476,0.064  
14,83.024,rs12437252,0.060  
14,83.028,rs17678601,0.058  
14,83.044,rs11159569,0.047  
14,83.049,rs9323731,0.058  
14,83.156,rs162654,0.062  
14,83.188,rs229788,0.059  
14,83.188,rs10484160,0.059  
14,83.207,rs17118600,0.070  
14,83.227,rs17118701,0.076  
14,83.241,rs10498564,0.080  
14,83.258,rs1269347,0.089  
14,83.259,rs1241928,0.087  
14,83.299,rs6574751,0.043  
14,83.306,rs12887744,0.036  
14,83.324,rs1241906,0.034  
14,83.362,rs1958453,0.033  
14,83.375,rs12589712,0.035  
14,83.380,rs1958442,0.036  
14,83.410,rs7145396,0.046  
14,83.424,rs1705650,0.051  
14,83.456,rs2137000,0.063  
14,83.463,rs7153883,0.066  
14,83.504,rs8005616,0.074  
14,83.552,rs4904160,0.085  
14,83.562,rs17119756,0.088  
14,83.563,rs7147015,0.089  
14,83.594,rs8003613,0.096  
14,83.598,rs1381610,0.098  
14,83.609,rs11159642,0.130  
14,83.640,rs4350505,0.139  
14,83.728,rs12894449,0.152  
14,83.765,rs1813404,0.166  
14,83.803,rs726957,0.178  
14,83.831,rs2623125,0.204

14,83.838,rs1481417,0.211  
14,83.841,rs1110774,0.211  
14,83.914,rs12881403,0.208  
14,83.922,rs856691,0.208  
14,83.927,rs856684,0.208  
14,84.175,rs1756575,0.223  
14,84.233,rs17120628,0.227  
14,84.310,rs2210303,0.268  
14,84.374,rs8022603,0.240  
14,84.393,rs17120944,0.239  
14,84.508,rs4899866,0.227  
14,84.825,rs1289414,0.225  
14,84.865,rs1289429,0.223  
14,84.971,rs17121169,0.204  
14,85.010,rs1884008,0.207  
14,85.076,rs12882910,0.192  
14,85.079,rs10137902,0.190  
14,85.089,rs1950177,0.185  
14,85.215,rs1956633,0.119  
14,85.233,rs2747005,0.115  
14,85.555,rs4595727,0.136  
14,85.717,rs4470088,0.141  
14,85.772,rs9972219,0.137  
14,85.974,rs1952582,0.138  
14,86.303,rs2153532,0.140  
14,86.407,rs2096073,0.154  
14,86.454,rs1289248,0.159  
14,86.458,rs11628919,0.160  
14,86.531,rs8007741,0.161  
14,86.532,rs7151572,0.160  
14,86.542,rs1638720,0.129  
14,86.577,rs12586410,0.065  
14,86.684,rs1615552,0.063  
14,86.796,rs7151042,0.060  
14,86.846,rs10139298,0.061  
14,86.916,rs17123675,0.062  
14,86.960,rs8010274,0.071  
14,86.965,rs1959720,0.072  
14,86.969,rs17259779,0.072  
14,86.997,rs1152368,0.072  
14,87.199,rs378816,0.055  
14,87.867,rs3850384,0.058  
14,88.128,rs8021613,0.060  
14,88.133,rs8007372,0.060  
14,88.219,rs1631092,0.077  
14,88.292,rs8009725,0.101  
14,88.519,rs11849247,0.119  
14,88.595,rs10148709,0.126  
14,88.633,rs422107,0.122  
14,88.735,rs10143067,0.112  
14,88.763,rs2025078,0.108  
14,88.805,rs2000611,0.105  
14,88.842,rs4904445,0.104  
14,88.894,rs12147268,0.111  
14,88.963,rs10141646,0.120  
14,89.620,rs366476,0.097  
14,89.620,rs2295136,0.104  
14,91.094,rs10134036,0.084  
14,91.162,rs17124948,0.080  
14,91.195,rs719572,0.077  
14,91.333,rs4904488,0.089

14,91.369,rs7146193,0.094  
14,91.438,rs8017825,0.098  
14,91.461,rs10147907,0.104  
14,91.489,rs1287603,0.115  
14,91.575,rs1033875,0.173  
14,91.622,rs17714667,0.202  
14,91.689,rs4904507,0.247  
14,91.700,rs8021839,0.244  
14,91.743,rs927617,0.239  
14,91.793,rs932731,0.259  
14,91.889,rs17125478,0.284  
14,91.892,rs8009301,0.260  
14,91.973,rs11624027,0.273  
14,92.045,rs4904523,0.275  
14,92.073,rs8007023,0.275  
14,92.099,rs10498620,0.283  
14,92.103,rs11845021,0.285  
14,92.192,rs3825671,0.284  
14,92.260,rs11846050,0.274  
14,92.416,rs4904569,0.281  
14,92.420,rs10151458,0.280  
14,92.473,rs4904574,0.257  
14,92.503,rs8006343,0.235  
14,92.536,rs7152796,0.254  
14,92.608,rs243224,0.296  
14,92.627,rs243229,0.312  
14,92.640,rs8018053,0.292  
14,92.683,rs10131830,0.282  
14,92.706,rs11845079,0.276  
14,92.744,rs1967854,0.239  
14,92.749,rs11622222,0.208  
14,92.827,rs243196,0.237  
14,92.857,rs12101236,0.250  
14,92.921,rs242776,0.277  
14,92.946,rs8011669,0.250  
14,92.963,rs11849798,0.270  
14,93.061,rs998564,0.264  
14,93.130,rs7143726,0.254  
14,93.194,rs7155435,0.252  
14,93.290,rs7160734,0.279  
14,93.349,rs11624003,0.266  
14,93.453,rs11626231,0.263  
14,93.613,rs7154092,0.249  
14,93.712,rs9488,0.247  
14,93.745,rs1286910,0.229  
14,93.783,rs8008501,0.235  
14,93.819,rs11623922,0.226  
14,93.826,rs4900026,0.225  
14,93.856,rs7155680,0.225  
14,94.009,rs12587362,0.274  
14,94.077,rs1294506,0.282  
14,94.115,rs17719594,0.283  
14,94.147,rs1640246,0.261  
14,94.153,rs17126831,0.253  
14,94.167,rs1294544,0.241  
14,94.188,rs1294573,0.263  
14,94.224,rs1286484,0.332  
14,94.251,rs1286459,0.377  
14,94.274,rs1286439,0.425  
14,94.289,rs1286421,0.440  
14,94.302,rs10130644,0.450

14,94.340,rs1742098,0.522  
14,94.357,rs1742083,0.550  
14,94.442,rs17795074,0.487  
14,94.512,rs1286291,0.466  
14,94.574,rs1152431,0.454  
14,94.695,rs7157525,0.403  
14,94.851,rs2295528,0.342  
14,94.873,rs2295525,0.351  
14,94.880,rs11622455,0.355  
14,94.906,rs8017969,0.373  
14,94.913,rs11626203,0.328  
14,94.941,rs7159692,0.364  
14,94.962,rs2277509,0.366  
14,94.982,rs753075,0.390  
14,95.001,rs11629007,0.402  
14,95.011,rs1285767,0.408  
14,95.115,rs1951251,0.401  
14,95.154,rs1285841,0.399  
14,95.353,rs11160011,0.419  
14,95.503,rs1949074,0.439  
14,95.538,rs17799749,0.433  
14,95.573,rs2202955,0.447  
14,95.621,rs7161259,0.457  
14,95.626,rs12889912,0.457  
14,95.640,rs17127496,0.455  
14,95.642,rs11160024,0.455  
14,95.922,rs2402075,0.351  
14,95.936,rs2402076,0.349  
14,95.961,rs929608,0.376  
14,95.974,rs2430342,0.341  
14,96.319,rs7144492,0.443  
14,96.392,rs2402111,0.467  
14,96.398,rs3814833,0.469  
14,96.565,rs8005444,0.491  
14,96.608,rs1742707,0.505  
14,96.646,rs2002627,0.600  
14,96.690,rs12883551,0.592  
14,96.749,rs4904868,0.621  
14,96.826,rs12887171,0.594  
14,96.844,rs8003333,0.581  
14,96.869,rs10143486,0.561  
14,96.948,rs12588868,0.528  
14,96.962,rs7144273,0.531  
14,97.000,rs4904939,0.535  
14,97.008,rs17783630,0.536  
14,97.051,rs7141239,0.401  
14,97.073,rs10498634,0.378  
14,97.089,rs7141006,0.327  
14,97.100,rs7156525,0.324  
14,97.115,rs2104239,0.324  
14,97.131,rs2402172,0.318  
14,97.149,rs8013925,0.311  
14,97.150,rs12433867,0.311  
14,97.172,rs1998434,0.312  
14,97.218,rs7153192,0.314  
14,97.231,rs12896830,0.309  
14,97.245,rs7150931,0.334  
14,97.288,rs2250672,0.288  
14,97.308,rs12586718,0.264  
14,97.315,rs1010651,0.256  
14,97.320,rs17736427,0.257



14,97.422,rs10147689,0.252  
14,97.514,rs3945958,0.277  
14,97.527,rs6650495,0.277  
14,97.595,rs11446,0.280  
14,97.611,rs2402226,0.281  
14,97.677,rs12435423,0.260  
14,97.745,rs11628021,0.283  
14,97.846,rs941542,0.308  
14,97.847,rs749619,0.308  
14,97.858,rs2749509,0.311  
14,98.126,rs7157141,0.386  
14,98.278,rs17128943,0.397  
14,98.295,rs10144530,0.398  
14,98.306,rs2077557,0.470  
14,99.140,rs11847714,0.473  
14,99.209,rs2181386,0.475  
14,99.587,rs4900191,0.471  
14,99.595,rs8008104,0.466  
14,99.634,rs12432245,0.408  
14,99.719,rs7141441,0.357  
14,99.729,rs1950969,0.354  
14,99.737,rs8013763,0.352  
14,99.772,rs8018864,0.324  
14,99.805,rs2896244,0.306  
14,99.807,rs17129181,0.305  
14,99.816,rs722462,0.336  
14,99.870,rs4905091,0.281  
14,99.896,rs4905092,0.282  
14,99.939,rs10142808,0.334  
14,99.982,rs8017732,0.387  
14,100.053,rs17129300,0.404  
14,100.060,rs4905110,0.404  
14,100.070,rs3748333,0.443  
14,100.112,rs2402374,0.445  
14,100.235,rs730959,0.391  
14,100.241,rs12436854,0.394  
14,100.274,rs7155044,0.404  
14,100.349,rs4905129,0.406  
14,100.537,rs4905143,0.410  
14,100.728,rs17190904,0.409  
14,100.800,rs12886562,0.409  
14,100.853,rs4905164,0.407  
14,101.397,rs11626051,0.388  
14,101.544,rs10498639,0.431  
14,101.735,rs2749527,0.439  
14,101.802,rs1243166,0.455  
14,101.886,rs1956707,0.472  
14,101.940,rs7160890,0.489  
14,101.957,rs17090790,0.492  
14,101.983,rs17825002,0.492  
14,101.992,rs7151095,0.492  
14,102.155,rs2295653,0.494  
14,102.206,rs11626091,0.531  
14,102.290,rs4905211,0.538  
14,102.332,rs10145558,0.542  
14,102.393,rs17752932,0.547  
14,102.480,rs10135681,0.567  
14,102.669,rs2069974,0.599  
14,102.712,rs1884082,0.626  
14,102.735,rs17826506,0.677  
14,102.759,rs12885659,0.732

14,102.778,rs17091191,0.764  
14,102.829,rs1955650,0.847  
14,102.837,rs17826697,0.848  
14,102.844,rs10148982,0.853  
14,102.912,rs17826925,0.891  
14,102.945,rs8016615,0.893  
14,103.068,rs12897986,0.938  
14,103.070,rs7145086,0.939  
14,103.107,rs8004620,1.019  
14,103.110,rs1950771,0.921  
14,103.111,rs10136233,0.901  
14,103.140,rs10139313,0.715  
14,103.145,rs4905248,0.644  
14,103.222,rs1243511,0.729  
14,103.244,rs7157079,0.718  
14,103.266,rs12432049,0.705  
14,103.273,rs1984239,0.605  
14,103.274,rs1243549,0.591  
14,103.285,rs12881798,0.666  
14,103.323,rs2983478,0.729  
14,103.332,rs744654,0.746  
14,103.363,rs10129901,0.760  
14,103.370,rs1243582,0.765  
14,103.393,rs8018330,0.760  
14,103.460,rs9323917,0.783  
14,103.465,rs7141416,0.786  
14,103.489,rs7154873,0.702  
14,103.547,rs7146324,0.600  
14,103.551,rs2353567,0.599  
14,103.583,rs11620631,0.550  
14,103.585,rs10136276,0.549  
14,103.605,rs6575497,0.543  
14,103.709,rs1187628,0.530  
14,103.727,rs12882788,0.517  
14,103.811,rs941567,0.461  
14,103.841,rs10149382,0.446  
14,103.908,rs1884535,0.432  
14,103.951,rs7161580,0.426  
14,103.967,rs1124242,0.425  
14,104.016,rs10147069,0.424  
14,104.019,rs941570,0.423  
14,104.056,rs12885098,0.443  
14,104.089,rs11849211,0.452  
14,104.115,rs17784060,0.457  
14,104.180,rs11848707,0.407  
14,104.185,rs8012238,0.404  
14,104.225,rs942326,0.385  
14,104.232,rs11622677,0.381  
14,104.234,rs10782484,0.357  
14,104.282,rs11846336,0.407  
14,104.299,rs4905298,0.411  
14,104.320,rs1747019,0.429  
14,104.344,rs1187751,0.457  
14,104.419,rs4905324,0.551  
14,104.435,rs1535188,0.566  
14,104.445,rs4905326,0.575  
14,104.482,rs17829116,0.542  
14,104.483,rs12588815,0.499  
14,104.530,rs6575515,0.417  
14,104.596,rs10782485,0.371  
14,104.754,rs2208663,0.368

14,104.757,rs2273750,0.368  
14,104.806,rs12878813,0.373  
14,104.973,rs8015016,0.357  
14,104.983,rs7150527,0.355  
14,104.996,rs1743490,0.355  
14,105.007,rs7151040,0.374  
14,105.031,rs1743506,0.416  
14,105.041,rs8011890,0.404  
14,105.054,rs1748952,0.364  
14,105.084,rs1619092,0.366  
14,105.250,rs10146784,0.379  
14,105.334,rs1951980,0.367  
14,105.356,rs1951981,0.370  
14,105.462,rs1001574,0.478  
14,105.616,rs2369319,0.447  
14,105.683,rs12880795,0.484  
14,105.688,rs10498647,0.485  
14,105.818,rs1998245,0.503  
14,105.834,rs1951297,0.503  
14,105.972,rs12432771,0.504  
14,106.116,rs11160307,0.498  
14,106.200,rs12897115,0.590  
14,106.309,rs11160315,0.613  
14,106.401,rs11621015,0.627  
14,106.424,rs872116,0.641  
14,106.441,rs17093887,0.650  
14,106.466,rs4144131,0.612  
14,106.469,rs945032,0.597  
14,106.502,rs945040,0.545  
14,106.503,rs10132462,0.545  
14,106.522,rs4905470,0.553  
14,106.545,rs2069596,0.552  
14,106.573,rs4905476,0.536  
14,106.580,rs2369522,0.532  
14,106.712,rs2053588,0.549  
14,106.729,rs8022264,0.565  
14,106.737,rs8019939,0.514  
14,106.756,rs4900324,0.497  
14,106.757,rs2275556,0.497  
14,106.811,rs17094086,0.516  
14,106.852,rs17094134,0.530  
14,107.107,rs4905507,0.704  
14,107.119,rs1570558,0.661  
14,107.126,rs2025366,0.610  
14,107.128,rs234601,0.611  
14,107.135,rs234600,0.578  
14,107.149,rs12588027,0.578  
14,107.258,rs2025364,0.573  
14,107.262,rs10143853,0.576  
14,107.298,rs1969795,0.606  
14,107.348,rs4144603,0.639  
14,107.448,rs2145639,0.616  
14,107.530,rs9323955,0.569  
14,107.659,rs4905564,0.557  
14,107.841,rs8022742,0.557  
14,107.938,rs1884062,0.580  
14,108.025,rs1950272,0.746  
14,108.040,rs10484169,0.783  
14,108.073,rs4905580,0.884  
14,108.078,rs1955589,0.899  
14,108.118,rs12586664,0.915

14,108.126,rs7153003,0.913  
14,108.146,rs8006687,0.817  
14,108.159,rs943588,0.813  
14,108.160,rs943587,0.812  
14,108.173,rs8006234,0.795  
14,108.197,rs4900365,0.802  
14,108.298,rs2370267,0.791  
14,108.356,rs1279885,0.778  
14,108.413,rs8008701,0.762  
14,108.556,rs17835902,0.799  
14,108.627,rs234452,0.884  
14,108.635,rs2129026,0.885  
14,108.756,rs2781409,0.951  
14,108.903,rs234220,1.099  
14,109.027,rs234152,1.240  
14,109.040,rs12588238,1.257  
14,109.053,rs17095704,1.270  
14,109.058,rs190182,1.272  
14,109.081,rs234177,1.264  
14,109.226,rs765034,1.231  
14,109.302,rs7160746,1.182  
14,109.358,rs898927,1.215  
14,109.373,rs4905623,1.132  
14,109.438,rs2781400,1.104  
14,109.514,rs2781388,1.051  
14,109.575,rs1548094,1.054  
14,109.668,rs2809137,1.057  
14,109.822,rs2124309,1.052  
14,110.435,rs12436399,1.049  
14,110.481,rs10484134,1.046  
14,110.530,rs698051,1.047  
14,111.035,rs10484125,1.043  
14,111.157,rs7157627,1.041  
14,111.690,rs7152787,1.004  
14,111.940,rs10132254,1.056  
14,112.174,rs8022566,1.026  
14,112.271,rs2400352,0.944  
14,112.438,rs10139212,0.758  
14,112.609,rs995365,0.753  
14,112.790,rs7148473,0.811  
14,112.800,rs17097484,0.813  
14,112.903,rs10141803,0.817  
14,113.042,rs8020624,0.812  
14,113.102,rs7147818,0.810  
14,113.112,rs17528679,0.804  
14,113.171,rs4905752,0.765  
14,113.324,rs7159863,0.782  
14,113.686,rs8019869,0.832  
14,113.960,rs11623043,0.867  
14,114.066,rs11851709,0.954  
14,114.089,rs17098020,0.970  
14,114.107,rs200331,0.979  
14,114.438,rs17098136,0.853  
14,114.446,rs902810,0.853  
14,114.460,rs1257630,0.861  
14,114.482,rs17098186,0.872  
14,114.488,rs2015350,0.878  
14,114.496,rs4905794,0.887  
14,114.573,rs1257676,0.971  
14,114.712,rs807375,0.888  
14,114.735,rs12434512,0.824

14,114.747,rs2988105,0.772  
14,114.767,rs2400528,0.712  
14,114.772,rs868666,0.696  
14,114.794,rs1152774,0.671  
14,114.821,rs710310,0.581  
14,114.825,rs1257428,0.617  
14,114.838,rs3936653,0.636  
14,114.918,rs941519,0.700  
14,114.976,rs2614467,0.787  
14,114.988,rs1704171,0.821  
14,115.005,rs1257324,0.863  
14,115.050,rs1257300,0.902  
14,115.075,rs1257273,0.920  
14,115.251,rs2069492,0.876  
14,115.334,rs941566,0.820  
14,115.380,rs8015948,0.765  
14,115.388,rs8009218,0.759  
14,115.413,rs2400759,0.756  
14,115.424,rs17095114,0.754  
14,115.543,rs3742377,0.708  
14,115.570,rs7157032,0.700  
14,115.612,rs960891,0.689  
14,115.672,rs17099050,0.659  
14,115.697,rs10144013,0.679  
14,115.699,rs7151803,0.682  
14,115.702,rs10141863,0.686  
14,115.735,rs7160423,0.773  
14,115.821,rs3783326,0.760  
14,115.925,rs7157261,0.743  
14,116.333,rs1190967,0.719  
14,116.544,rs1951486,0.711  
14,116.567,rs878078,0.704  
14,116.793,rs756055,0.645  
14,117.061,rs9324018,0.690  
14,117.246,rs12897338,0.675  
14,117.690,rs7142209,0.767  
14,118.033,rs1190917,0.855  
14,118.061,rs1190922,0.858  
14,118.213,rs10146962,0.896  
14,118.274,rs17099637,0.866  
14,118.312,rs1555406,0.871  
14,118.428,rs7146712,0.950  
14,118.454,rs1884537,0.929  
14,118.541,rs12890188,0.816  
14,118.590,rs3087917,0.836  
14,118.656,rs1998053,0.798  
14,118.661,rs4906024,0.802  
14,118.685,rs8008201,0.816  
14,118.696,rs8021312,0.850  
14,118.731,rs11851174,0.875  
14,118.762,rs3809404,0.930  
14,118.778,rs4900479,1.017  
14,118.790,rs2180386,1.027  
14,118.980,rs17172,1.187  
14,119.055,rs8021854,1.232  
14,119.085,rs10132309,1.245  
14,119.115,rs10136671,1.256  
14,119.140,rs7140271,1.266  
14,119.303,rs10141627,1.287  
14,119.322,rs2400968,1.298  
14,119.612,rs4906066,1.121

14,119.618,rs8007317,1.162  
14,119.624,rs4900490,1.199  
14,119.635,rs17099963,1.194  
14,119.688,rs12898111,0.989  
14,119.738,rs4906076,0.982  
14,119.747,rs947193,0.992  
14,119.749,rs915380,0.994  
14,119.809,rs12434963,0.954  
14,119.836,rs10131928,0.945  
14,119.862,rs2400997,0.971  
14,119.919,rs2400998,0.949  
14,119.952,rs4906091,0.936  
14,120.078,rs945020,0.911  
14,120.292,rs2275016,0.792  
14,120.306,rs4900505,0.749  
14,120.313,rs10133989,0.754  
14,120.439,rs7149416,0.761  
14,120.571,rs12880910,0.757  
14,120.609,rs3818079,0.754  
14,120.622,rs7153709,0.756  
14,120.681,rs1190712,0.805  
14,121.021,rs2144064,0.935  
14,121.436,rs7141459,1.065  
14,121.618,rs1678031,1.117  
14,121.707,rs4900525,1.135  
14,121.711,rs3818188,1.136  
14,121.748,rs11621560,1.191  
14,121.913,rs2183637,1.163  
14,122.005,rs8008097,1.145  
14,122.042,rs17791240,1.120  
14,122.317,rs747164,0.878  
14,122.322,rs4906259,0.877  
14,122.352,rs12148050,0.876  
14,122.468,rs4708,0.855  
14,122.555,rs751837,0.849  
14,122.556,rs11627664,0.849  
14,122.608,rs1190223,0.821  
14,122.647,rs11844761,0.800  
14,122.727,rs710100,0.829  
14,122.756,rs8003400,0.821  
14,122.765,rs9672002,0.814  
14,122.835,rs2771369,0.757  
14,122.858,rs1969852,0.714  
14,122.867,rs2403144,0.696  
14,122.874,rs9743995,0.677  
14,122.933,rs1570712,0.589  
14,123.159,rs10129426,0.544  
14,123.481,rs8015761,0.497  
14,123.508,rs11850704,0.497  
14,123.588,rs10142229,0.499  
14,123.608,rs12589669,0.499  
14,123.674,rs941949,0.451  
14,123.726,rs2011069,0.414  
14,123.754,rs8013773,0.395  
14,123.764,rs1890981,0.389  
14,123.783,rs10135847,0.378  
14,123.814,rs4906423,0.357  
14,123.838,rs10143250,0.334  
14,123.872,rs10137053,0.342  
14,123.877,rs4906435,0.347  
14,123.959,rs4243749,0.388

14,123.966,rs12897807,0.402  
14,123.993,rs12434726,0.457  
14,124.095,rs8012258,0.568  
14,124.157,rs3803318,0.600  
14,124.193,rs4983506,0.624  
14,124.216,rs8023004,0.640  
14,124.266,rs11160817,0.608  
14,124.328,rs2498804,0.569  
14,124.371,rs4983559,0.523  
14,124.425,rs4983561,0.540  
14,124.493,rs1048257,0.523  
14,124.684,rs2091918,0.534  
14,124.724,rs11625865,0.530  
14,124.986,rs4983411,0.439  
14,125.001,rs9671696,0.439  
14,126.306,rs10149476,0.609  
15,6.099,rs12915528,-0.450  
15,6.231,rs8029691,-0.465  
15,6.276,rs1544285,-0.470  
15,6.318,rs2289815,-0.462  
15,6.422,rs7175101,-0.406  
15,6.440,rs12907198,-0.361  
15,6.469,rs11634023,-0.389  
15,6.524,rs12594495,-0.418  
15,6.567,rs4778471,-0.420  
15,6.675,rs3693,-0.391  
15,6.718,rs7170784,-0.344  
15,6.770,rs4778334,-0.306  
15,6.773,rs12439636,-0.305  
15,6.778,rs7181789,-0.393  
15,6.781,rs3812923,-0.395  
15,6.786,rs6606823,-0.397  
15,6.804,rs4778575,-0.393  
15,6.868,rs12900552,-0.366  
15,7.260,rs3883043,-0.307  
15,8.428,rs8023331,-0.176  
15,8.485,rs4778531,-0.168  
15,8.596,rs1526175,-0.158  
15,8.652,rs11638266,-0.173  
15,8.705,rs4778560,-0.155  
15,8.902,rs10873623,-0.169  
15,8.957,rs6576525,-0.168  
15,9.119,rs7181128,-0.160  
15,9.289,rs17116917,-0.130  
15,9.472,rs1722791,-0.098  
15,9.581,rs8025564,-0.088  
15,9.882,rs940595,-0.061  
15,9.923,rs8038234,-0.037  
15,9.926,rs824209,-0.037  
15,10.130,rs4778340,-0.013  
15,10.210,rs10519445,-0.011  
15,10.361,rs10162946,-0.015  
15,10.562,rs8041086,-0.023  
15,10.690,rs2353499,-0.015  
15,10.789,rs4778272,-0.011  
15,11.070,rs7179664,-0.006  
15,11.112,rs1850475,-0.007  
15,11.320,rs12161938,-0.008  
15,12.195,rs6576326,-0.006  
15,12.550,rs4906706,-0.007  
15,12.725,rs17114621,-0.005

15,12.842,rs8034405,-0.003  
15,12.903,rs12913093,-0.005  
15,12.981,rs17114774,-0.002  
15,13.111,rs736008,-0.001  
15,13.133,rs7164989,-0.003  
15,13.212,rs12592215,-0.002  
15,13.235,rs3867499,-0.000  
15,13.298,rs2030062,-0.000  
15,13.349,rs2201839,-0.000  
15,13.358,rs8037745,-0.000  
15,13.375,rs7175782,0.000  
15,13.406,rs12438586,0.000  
15,13.427,rs17114848,-0.000  
15,13.441,rs2075814,-0.000  
15,13.470,rs2647364,0.000  
15,13.481,rs2736705,0.001  
15,13.683,rs705,0.011  
15,14.337,rs691,0.039  
15,14.408,rs2714717,0.041  
15,14.459,rs7497265,0.042  
15,14.488,rs2739826,0.042  
15,15.460,rs11637057,0.022  
15,15.530,rs12903486,0.020  
15,15.555,rs1000040,0.019  
15,15.624,rs718979,0.019  
15,15.624,rs718980,0.019  
15,15.743,rs2605463,0.023  
15,15.776,rs1008531,0.016  
15,15.831,rs2341140,0.017  
15,15.907,rs2925260,0.025  
15,16.000,rs2930648,0.034  
15,16.057,rs7179423,0.022  
15,16.066,rs2066710,0.014  
15,16.176,rs744280,0.027  
15,16.185,rs2014069,0.027  
15,16.193,rs4906624,0.027  
15,16.258,rs8027096,0.016  
15,16.325,rs11161217,0.022  
15,16.344,rs17637182,0.022  
15,16.369,rs8036650,0.023  
15,16.379,rs12595426,0.023  
15,16.403,rs8039801,0.021  
15,16.519,rs12101499,0.013  
15,16.569,rs11637218,0.012  
15,16.607,rs7166725,0.009  
15,16.645,rs8031393,0.014  
15,16.669,rs12324398,0.021  
15,16.677,rs8043094,0.022  
15,16.688,rs4260026,0.023  
15,16.802,rs7173059,0.032  
15,16.832,rs11161254,0.027  
15,16.844,rs4906809,0.027  
15,16.845,rs1811753,0.018  
15,16.847,rs12148810,0.037  
15,16.849,rs11858322,0.041  
15,16.942,rs12903744,0.053  
15,16.978,rs17116451,0.057  
15,16.999,rs1511487,0.056  
15,17.064,rs12437822,0.045  
15,17.079,rs17736307,0.049  
15,17.101,rs4906838,0.053



15,17.161,rs17644252,0.032  
15,17.338,rs8025577,0.027  
15,17.364,rs1880028,0.027  
15,17.420,rs9806314,0.017  
15,17.496,rs4906866,0.020  
15,17.552,rs573075,0.020  
15,17.622,rs7180612,0.017  
15,17.726,rs2573690,0.021  
15,17.880,rs2573695,0.018  
15,17.949,rs4076021,0.023  
15,17.997,rs7171237,0.026  
15,18.114,rs10519545,0.015  
15,18.137,rs8038232,0.012  
15,18.178,rs11161304,0.006  
15,18.269,rs4906879,0.008  
15,18.300,rs2059637,0.015  
15,18.427,rs2912600,0.007  
15,18.504,rs1593609,0.005  
15,18.706,rs4906679,0.006  
15,18.918,rs7173713,0.026  
15,18.989,rs7172653,0.034  
15,19.060,rs754661,0.025  
15,19.080,rs17738278,0.025  
15,19.246,rs8024864,0.031  
15,19.359,rs11161341,0.035  
15,19.393,rs4613037,0.034  
15,19.410,rs6576622,0.033  
15,19.412,rs12441474,0.033  
15,19.813,rs140685,0.057  
15,19.894,rs7403021,0.073  
15,19.998,rs1368022,0.065  
15,20.083,rs7177870,0.056  
15,20.087,rs8023912,0.055  
15,20.124,rs1011455,0.048  
15,20.143,rs7494955,0.055  
15,20.160,rs6606866,0.053  
15,20.288,rs6606873,0.052  
15,20.357,rs1029938,0.049  
15,20.469,rs7402147,0.042  
15,20.514,rs17671946,0.037  
15,20.611,rs9972391,0.052  
15,20.622,rs6606888,0.054  
15,20.623,rs7173587,0.053  
15,20.627,rs7495580,0.052  
15,20.696,rs17137727,0.037  
15,20.757,rs1551419,0.042  
15,20.797,rs6606897,0.042  
15,21.036,rs4238490,0.033  
15,21.087,rs9920954,0.040  
15,21.116,rs12913576,0.029  
15,21.125,rs7167588,0.027  
15,21.167,rs4778147,0.026  
15,21.290,rs1382056,0.021  
15,21.343,rs3098545,0.019  
15,21.346,rs3098547,0.019  
15,21.359,rs17565175,0.023  
15,21.371,rs1871017,0.019  
15,21.401,rs3097531,0.027  
15,21.435,rs3101649,0.031  
15,21.438,rs12592963,0.031  
15,21.459,rs3110483,0.034

15,21.491,rs1107267,0.018  
15,21.525,rs11633934,0.019  
15,21.526,rs4312267,0.018  
15,21.553,rs4778179,0.015  
15,21.627,rs4778192,0.013  
15,21.655,rs4778199,0.011  
15,21.731,rs977588,0.008  
15,21.821,rs2871875,0.001  
15,21.838,rs4778232,0.002  
15,21.926,rs7183877,0.002  
15,22.649,rs1490078,-0.017  
15,22.650,rs1873282,-0.017  
15,22.654,rs4603522,-0.017  
15,23.467,rs3751562,-0.034  
15,23.526,rs2306933,-0.035  
15,23.754,rs4779853,-0.036  
15,23.817,rs11858397,-0.034  
15,23.835,rs4420502,-0.034  
15,24.630,rs10519634,-0.060  
15,24.653,rs7163518,-0.096  
15,24.660,rs1459361,-0.143  
15,24.670,rs7171078,-0.132  
15,24.738,rs260546,-0.125  
15,24.768,rs16955651,-0.124  
15,24.824,rs3784353,-0.124  
15,24.942,rs12916064,-0.132  
15,25.084,rs785442,-0.140  
15,25.113,rs785426,-0.143  
15,25.179,rs1357386,-0.148  
15,25.193,rs7182831,-0.149  
15,25.228,rs2049259,-0.152  
15,25.293,rs11070233,-0.200  
15,25.313,rs8035969,-0.206  
15,25.350,rs3923926,-0.205  
15,25.379,rs8036260,-0.204  
15,25.411,rs10152753,-0.216  
15,26.455,rs12905321,-0.262  
15,27.641,rs2949576,-0.280  
15,28.126,rs4779814,-0.269  
15,28.556,rs4779829,-0.295  
15,28.726,rs813299,-0.334  
15,28.878,rs7178760,-0.308  
15,28.887,rs6493540,-0.307  
15,29.031,rs7162289,-0.284  
15,29.042,rs11070914,-0.286  
15,29.214,rs7169662,-0.217  
15,29.273,rs4779521,-0.205  
15,29.282,rs4268714,-0.205  
15,29.416,rs8039613,-0.192  
15,29.575,rs7164892,-0.177  
15,29.689,rs17228387,-0.179  
15,30.259,rs8037451,-0.193  
15,30.459,rs4238558,-0.197  
15,30.552,rs4779937,-0.206  
15,30.600,rs10519712,-0.174  
15,30.708,rs4779948,-0.133  
15,30.796,rs1514260,-0.136  
15,30.875,rs11071503,-0.150  
15,31.010,rs6494223,-0.158  
15,31.035,rs13329490,-0.187  
15,32.172,rs11632524,-0.073

15,32.190,rs11635997,-0.073  
15,32.230,rs8023613,-0.064  
15,32.259,rs11634086,-0.057  
15,32.304,rs1997316,-0.063  
15,32.308,rs7494781,-0.063  
15,32.496,rs2077680,-0.043  
15,32.521,rs7180433,-0.042  
15,32.527,rs8036757,-0.042  
15,32.569,rs12905294,-0.048  
15,32.674,rs4780052,-0.027  
15,32.684,rs12917529,-0.026  
15,32.751,rs12912842,-0.020  
15,32.769,rs12904870,-0.027  
15,32.884,rs2597094,-0.018  
15,32.902,rs1871362,-0.018  
15,32.905,rs343918,-0.018  
15,32.933,rs345827,-0.034  
15,32.945,rs345850,-0.043  
15,32.972,rs182951,-0.048  
15,33.026,rs17235554,-0.060  
15,33.062,rs345803,-0.060  
15,33.114,rs12910096,-0.057  
15,33.143,rs2468756,-0.056  
15,33.187,rs11633650,-0.070  
15,33.254,rs974379,-0.075  
15,33.278,rs11072340,-0.080  
15,33.281,rs11638698,-0.083  
15,33.282,rs12443212,-0.085  
15,33.285,rs11072342,-0.086  
15,33.292,rs8025470,-0.072  
15,33.292,rs2292547,-0.072  
15,33.320,rs8027453,-0.085  
15,33.356,rs13329628,-0.088  
15,33.371,rs7173234,-0.087  
15,33.407,rs2251110,-0.077  
15,33.413,rs2292728,-0.076  
15,33.435,rs16969325,-0.077  
15,33.472,rs16969847,-0.079  
15,33.482,rs1343900,-0.079  
15,33.537,rs2676055,-0.071  
15,33.550,rs2676049,-0.101  
15,33.551,rs2596193,-0.086  
15,33.606,rs2596230,-0.090  
15,33.632,rs8023659,-0.081  
15,33.661,rs2033610,-0.067  
15,33.703,rs12324605,-0.072  
15,33.722,rs2596210,-0.083  
15,33.724,rs1435110,-0.085  
15,33.738,rs7165389,-0.091  
15,33.764,rs2596220,-0.104  
15,33.813,rs1865495,-0.095  
15,33.866,rs658750,-0.085  
15,33.899,rs8034012,-0.079  
15,33.943,rs4238567,-0.082  
15,33.952,rs10775211,-0.083  
15,34.008,rs4779631,-0.056  
15,34.015,rs716368,-0.039  
15,34.056,rs6495218,-0.032  
15,34.058,rs8028974,-0.032  
15,34.077,rs12906709,-0.032  
15,34.085,rs11635223,-0.032

15,34.087,rs6495228,-0.032  
15,34.091,rs891345,-0.033  
15,34.093,rs7165379,-0.033  
15,34.138,rs12148238,-0.031  
15,34.169,rs7165052,-0.048  
15,34.194,rs11855625,-0.050  
15,34.247,rs2288611,-0.054  
15,34.260,rs1560318,-0.057  
15,34.269,rs2059956,-0.058  
15,34.359,rs1477436,-0.053  
15,34.396,rs10152468,-0.052  
15,34.534,rs519152,-0.045  
15,34.560,rs603152,-0.044  
15,34.743,rs16958780,-0.048  
15,34.763,rs12900743,-0.048  
15,34.793,rs12908333,-0.051  
15,34.987,rs2705343,-0.073  
15,35.151,rs347797,-0.078  
15,35.155,rs442873,-0.078  
15,35.163,rs2279685,-0.078  
15,35.172,rs2279686,-0.078  
15,35.651,rs1436918,-0.071  
15,35.691,rs1436911,-0.079  
15,35.788,rs672382,-0.107  
15,35.850,rs664251,-0.109  
15,35.879,rs573441,-0.129  
15,35.909,rs746216,-0.143  
15,35.934,rs6495717,-0.116  
15,36.010,rs1055356,-0.091  
15,36.296,rs8032009,-0.089  
15,36.330,rs8031878,-0.090  
15,36.342,rs12902095,-0.107  
15,36.348,rs10162694,-0.114  
15,36.374,rs2339777,-0.118  
15,36.379,rs8039278,-0.118  
15,36.401,rs730493,-0.113  
15,36.431,rs16960370,-0.107  
15,36.808,rs2197412,-0.150  
15,37.019,rs17585880,-0.131  
15,37.052,rs11638250,-0.129  
15,37.177,rs1020307,-0.110  
15,37.354,rs12595392,-0.089  
15,37.382,rs319884,-0.085  
15,37.473,rs2879653,-0.083  
15,37.490,rs8038211,-0.075  
15,37.525,rs2647672,-0.061  
15,37.526,rs2256109,-0.060  
15,37.559,rs1027486,-0.052  
15,37.700,rs1566173,-0.019  
15,37.737,rs1497815,-0.014  
15,37.743,rs789777,-0.013  
15,37.753,rs11638423,-0.014  
15,37.764,rs1397255,-0.011  
15,37.765,rs6495809,-0.011  
15,37.774,rs1510385,-0.025  
15,37.793,rs4923705,-0.037  
15,37.826,rs17619758,-0.046  
15,37.852,rs1946706,-0.048  
15,37.928,rs17630276,-0.033  
15,37.929,rs1435681,-0.033  
15,37.958,rs16962756,-0.040

15,37.985,rs7495602,-0.046  
15,37.985,rs1517878,-0.046  
15,37.989,rs10518868,-0.047  
15,38.005,rs4923709,-0.040  
15,38.010,rs2381780,-0.043  
15,38.028,rs8028529,-0.058  
15,38.032,rs4924057,-0.060  
15,38.043,rs7170927,-0.063  
15,38.062,rs11857344,-0.072  
15,38.063,rs7180805,-0.074  
15,38.074,rs896994,-0.080  
15,38.092,rs16963122,-0.092  
15,38.196,rs12899716,-0.122  
15,38.627,rs6495864,-0.127  
15,38.680,rs4923723,-0.136  
15,38.843,rs2041849,-0.159  
15,39.204,rs11073204,-0.154  
15,39.323,rs1450418,-0.151  
15,39.338,rs8036552,-0.150  
15,39.344,rs16964235,-0.150  
15,39.347,rs12595046,-0.167  
15,39.348,rs17432433,-0.175  
15,39.366,rs1450414,-0.194  
15,39.383,rs11853132,-0.270  
15,39.415,rs1450417,-0.219  
15,39.434,rs4640136,-0.227  
15,39.456,rs12439749,-0.265  
15,39.484,rs16964327,-0.266  
15,39.561,rs1376071,-0.235  
15,39.620,rs16964414,-0.236  
15,39.664,rs8034391,-0.237  
15,39.683,rs940093,-0.237  
15,39.797,rs4924117,-0.231  
15,39.804,rs2030592,-0.228  
15,39.857,rs4989607,-0.225  
15,39.891,rs8041675,-0.197  
15,40.033,rs1464284,-0.184  
15,40.120,rs16954380,-0.175  
15,40.134,rs2701516,-0.173  
15,40.145,rs11073224,-0.171  
15,40.252,rs3108784,-0.160  
15,40.388,rs16964798,-0.156  
15,40.428,rs8028213,-0.156  
15,40.594,rs1401895,-0.154  
15,40.652,rs11632275,-0.180  
15,40.699,rs1520959,-0.189  
15,40.912,rs624991,-0.234  
15,41.391,rs17447142,-0.212  
15,41.773,rs4483815,-0.222  
15,41.851,rs8039764,-0.230  
15,41.873,rs972894,-0.215  
15,41.898,rs16965467,-0.159  
15,41.958,rs16965475,-0.147  
15,42.181,rs5025837,-0.101  
15,42.252,rs1108081,-0.102  
15,42.358,rs4924198,-0.094  
15,42.370,rs8041665,-0.093  
15,42.434,rs8033434,-0.098  
15,42.444,rs8030904,-0.098  
15,42.471,rs12594922,-0.095  
15,42.476,rs1502404,-0.093

15,42.510,rs7496477,-0.071  
15,42.580,rs4505261,-0.043  
15,42.627,rs1393418,-0.016  
15,42.630,rs10520077,-0.014  
15,42.670,rs7182018,0.014  
15,42.676,rs11638546,0.022  
15,42.680,rs11070197,0.027  
15,42.684,rs8043207,0.039  
15,42.713,rs936532,0.040  
15,42.761,rs1994379,0.037  
15,42.767,rs2664135,0.036  
15,42.789,rs661197,0.028  
15,42.794,rs275721,0.026  
15,42.802,rs1436274,0.021  
15,42.809,rs1836847,0.019  
15,42.822,rs486816,0.016  
15,42.844,rs3207297,0.011  
15,42.848,rs8042947,0.011  
15,42.860,rs16970325,0.010  
15,42.861,rs12913170,0.010  
15,42.864,rs11858141,0.009  
15,42.881,rs1565866,0.011  
15,42.899,rs1017843,0.023  
15,42.901,rs8034964,0.023  
15,42.902,rs2306480,0.016  
15,42.903,rs2277562,0.010  
15,42.911,rs4924445,0.009  
15,42.927,rs1898885,0.005  
15,42.928,rs4605132,0.010  
15,42.935,rs11630119,0.005  
15,42.948,rs2034650,0.004  
15,42.956,rs3803357,0.004  
15,43.047,rs7915,-0.000  
15,43.072,rs12592197,-0.001  
15,43.080,rs6492971,-0.002  
15,43.125,rs1678750,-0.007  
15,43.232,rs721772,-0.009  
15,43.323,rs1618332,-0.010  
15,43.330,rs1621597,-0.010  
15,43.332,rs8043408,-0.011  
15,43.333,rs17687331,-0.011  
15,43.337,rs8035074,-0.019  
15,43.345,rs1614300,-0.020  
15,43.357,rs2724938,-0.019  
15,43.368,rs800719,-0.018  
15,43.376,rs8028204,-0.019  
15,43.386,rs650392,-0.019  
15,43.387,rs1356410,-0.012  
15,43.388,rs11858217,-0.011  
15,43.388,rs4923929,-0.011  
15,43.420,rs2277533,-0.017  
15,43.472,rs8033734,-0.015  
15,43.747,rs6493065,-0.008  
15,44.426,rs8040336,-0.001  
15,44.617,rs7178452,-0.000  
15,44.716,rs6493094,-0.000  
15,45.368,rs7172106,0.002  
15,45.383,rs2453274,0.002  
15,45.495,rs2556568,0.002  
15,45.627,rs3759871,0.003  
15,45.816,rs2462043,0.012

15,45.830,rs1720727,0.013  
15,45.852,rs4485326,0.020  
15,46.094,rs12902975,0.024  
15,46.167,rs11636774,0.021  
15,46.241,rs1648282,0.019  
15,46.263,rs1648290,0.019  
15,46.391,rs12909221,0.022  
15,46.468,rs2733250,0.023  
15,46.506,rs6493166,0.023  
15,46.515,rs10643,0.023  
15,46.544,rs951295,0.023  
15,46.586,rs17629768,0.023  
15,46.595,rs588590,0.023  
15,46.701,rs4774770,0.022  
15,46.886,rs11852360,0.020  
15,46.966,rs2460626,0.019  
15,47.456,rs4775254,0.022  
15,47.488,rs2075,0.022  
15,47.504,rs10459609,0.023  
15,47.588,rs17653050,0.011  
15,47.612,rs12441691,0.010  
15,47.649,rs7181951,0.010  
15,47.656,rs8039174,0.010  
15,47.804,rs2043179,0.006  
15,47.902,rs1516843,0.002  
15,47.905,rs11630435,0.002  
15,47.944,rs1996671,0.003  
15,47.955,rs12592760,0.003  
15,48.059,rs16957825,0.003  
15,48.108,rs17268264,0.003  
15,48.285,rs12442708,0.006  
15,48.300,rs17271669,0.006  
15,48.350,rs11070553,0.006  
15,48.554,rs1588913,0.004  
15,48.598,rs921764,0.003  
15,48.658,rs6493270,0.000  
15,48.711,rs2433020,-0.001  
15,48.714,rs281215,-0.001  
15,48.740,rs16959540,-0.001  
15,48.823,rs1898110,-0.003  
15,48.935,rs671434,-0.017  
15,48.938,rs645856,-0.018  
15,48.967,rs8037500,-0.007  
15,48.968,rs6493299,-0.006  
15,48.977,rs633868,-0.002  
15,49.011,rs549368,-0.002  
15,49.013,rs682567,-0.002  
15,49.064,rs2924578,-0.001  
15,49.087,rs2470104,-0.001  
15,49.097,rs2433363,-0.001  
15,49.112,rs10519163,-0.001  
15,49.127,rs2469592,-0.000  
15,49.305,rs12050562,-0.001  
15,49.353,rs11635140,-0.001  
15,49.458,rs16961323,-0.007  
15,49.485,rs17463995,-0.007  
15,49.489,rs2413913,-0.007  
15,49.490,rs784414,-0.007  
15,49.543,rs2899423,-0.005  
15,49.568,rs12906456,-0.004  
15,49.580,rs10519192,-0.003

15,49.596,rs16961815,-0.003  
15,49.607,rs12593599,-0.002  
15,49.614,rs11070664,-0.002  
15,49.620,rs10851473,-0.002  
15,49.625,rs11070668,-0.003  
15,49.630,rs4775789,-0.003  
15,49.632,rs11070670,-0.006  
15,49.649,rs8037958,-0.003  
15,49.929,rs11634375,-0.009  
15,49.983,rs10220770,-0.011  
15,50.043,rs12906463,-0.015  
15,50.065,rs691552,-0.016  
15,50.098,rs10519239,-0.015  
15,50.125,rs7182178,-0.014  
15,50.177,rs9806676,-0.006  
15,50.393,rs8024247,-0.007  
15,50.906,rs2306331,-0.016  
15,51.417,rs9972359,-0.029  
15,51.527,rs7167343,-0.026  
15,51.543,rs2470152,-0.025  
15,51.553,rs3751591,-0.026  
15,51.617,rs2445738,-0.019  
15,51.620,rs12899040,-0.024  
15,51.923,rs544023,-0.061  
15,52.198,rs7177328,-0.055  
15,52.384,rs6493546,-0.055  
15,52.426,rs4496072,-0.063  
15,52.447,rs3751624,-0.066  
15,52.469,rs12050717,-0.073  
15,52.471,rs1045699,-0.074  
15,52.477,rs17613475,-0.075  
15,52.520,rs10518683,-0.072  
15,52.559,rs8024439,-0.068  
15,52.830,rs8035237,-0.049  
15,52.838,rs8031716,-0.051  
15,52.854,rs12437920,-0.047  
15,52.855,rs8034464,-0.047  
15,52.886,rs2440332,-0.043  
15,53.012,rs17626394,-0.061  
15,53.077,rs7176525,-0.078  
15,53.184,rs8025430,-0.071  
15,53.333,rs4774658,-0.080  
15,53.347,rs12148511,-0.083  
15,53.374,rs1027010,-0.089  
15,53.413,rs4774662,-0.130  
15,53.416,rs1021747,-0.120  
15,53.419,rs12911817,-0.131  
15,53.426,rs624613,-0.105  
15,53.449,rs2055407,-0.110  
15,53.450,rs1607023,-0.110  
15,53.460,rs12595143,-0.107  
15,53.487,rs957284,-0.127  
15,53.522,rs7178887,-0.131  
15,53.560,rs4774673,-0.135  
15,53.610,rs2126190,-0.119  
15,53.625,rs2711584,-0.114  
15,53.663,rs2616894,-0.118  
15,53.672,rs2616879,-0.109  
15,53.687,rs1478190,-0.095  
15,53.688,rs17633184,-0.094  
15,53.706,rs2616915,-0.098



15,53.723,rs2115827,-0.078  
15,53.724,rs2163196,-0.094  
15,53.733,rs2115825,-0.098  
15,53.742,rs10518754,-0.098  
15,53.747,rs1897023,-0.100  
15,53.780,rs12591326,-0.090  
15,53.814,rs8038935,-0.096  
15,53.816,rs8027528,-0.094  
15,53.827,rs11071063,-0.088  
15,53.840,rs12917198,-0.082  
15,53.867,rs16974503,-0.072  
15,53.869,rs1158075,-0.072  
15,53.882,rs4774692,-0.070  
15,53.918,rs11857095,-0.062  
15,53.995,rs2553226,-0.055  
15,53.997,rs1850999,-0.055  
15,54.011,rs1851006,-0.054  
15,54.060,rs4500668,-0.056  
15,54.092,rs8029702,-0.053  
15,54.108,rs992348,-0.051  
15,54.118,rs7182653,-0.051  
15,54.124,rs2721129,-0.062  
15,54.127,rs2414385,-0.064  
15,54.218,rs1879337,-0.075  
15,54.326,rs7181383,-0.096  
15,54.380,rs11858741,-0.127  
15,54.382,rs12594750,-0.127  
15,54.496,rs6493767,-0.116  
15,54.520,rs8042411,-0.114  
15,54.547,rs16976187,-0.113  
15,54.585,rs11071175,-0.111  
15,54.587,rs10518808,-0.111  
15,54.857,rs4447360,-0.114  
15,54.911,rs11071188,-0.100  
15,55.732,rs6493819,-0.154  
15,55.758,rs4774822,-0.146  
15,55.778,rs11071215,-0.138  
15,55.809,rs11631355,-0.129  
15,56.233,rs10518827,-0.143  
15,56.472,rs2036741,-0.151  
15,56.486,rs12907507,-0.152  
15,56.489,rs12595720,-0.122  
15,56.490,rs11071240,-0.130  
15,56.498,rs12913391,-0.130  
15,56.853,rs2718946,-0.130  
15,57.340,rs1426065,-0.129  
15,58.149,rs1715919,-0.150  
15,58.200,rs11856746,-0.155  
15,58.927,rs10518870,-0.205  
15,59.399,rs2615233,-0.192  
15,59.679,rs2440943,-0.209  
15,59.747,rs735609,-0.214  
15,59.749,rs8033575,-0.214  
15,59.771,rs7177670,-0.210  
15,59.810,rs1664454,-0.203  
15,59.820,rs2440968,-0.197  
15,59.894,rs1280400,-0.162  
15,59.913,rs1018268,-0.152  
15,59.915,rs3817186,-0.152  
15,59.921,rs1280416,-0.151  
15,59.928,rs1511951,-0.151

15,59.930,rs4774942,-0.151  
15,59.946,rs2932195,-0.153  
15,59.953,rs2922220,-0.153  
15,60.020,rs2942046,-0.143  
15,60.076,rs766103,-0.134  
15,60.095,rs4774964,-0.130  
15,60.097,rs16977601,-0.130  
15,60.125,rs2453088,-0.129  
15,60.194,rs12442987,-0.143  
15,60.219,rs11635989,-0.148  
15,60.254,rs2554041,-0.149  
15,60.260,rs11071339,-0.150  
15,60.333,rs8026018,-0.166  
15,60.374,rs2197092,-0.158  
15,60.592,rs4238328,-0.169  
15,60.710,rs2704230,-0.162  
15,60.829,rs16939816,-0.154  
15,60.903,rs1618930,-0.130  
15,60.939,rs9920375,-0.132  
15,61.040,rs2899620,-0.140  
15,61.068,rs938508,-0.141  
15,61.098,rs7179609,-0.143  
15,61.164,rs17821171,-0.145  
15,61.224,rs7172930,-0.147  
15,61.333,rs4775035,-0.173  
15,61.379,rs473422,-0.169  
15,61.395,rs371125,-0.166  
15,61.428,rs7164909,-0.161  
15,61.438,rs415799,-0.159  
15,61.476,rs414846,-0.147  
15,61.509,rs4774297,-0.154  
15,61.533,rs6494006,-0.157  
15,61.556,rs573922,-0.151  
15,61.586,rs934297,-0.149  
15,61.627,rs4775053,-0.154  
15,61.650,rs1869138,-0.158  
15,61.703,rs4613005,-0.170  
15,61.727,rs7162855,-0.179  
15,61.771,rs8039477,-0.198  
15,62.610,rs8037673,-0.194  
15,62.784,rs10518996,-0.189  
15,62.805,rs11631644,-0.189  
15,62.927,rs17269545,-0.181  
15,62.949,rs11852359,-0.175  
15,62.961,rs11634752,-0.172  
15,62.986,rs11855027,-0.193  
15,63.085,rs747723,-0.182  
15,63.092,rs1017888,-0.181  
15,63.182,rs16941384,-0.205  
15,63.213,rs12902190,-0.213  
15,63.229,rs11855974,-0.220  
15,63.258,rs11638680,-0.221  
15,63.381,rs4775175,-0.224  
15,63.392,rs17302400,-0.221  
15,63.454,rs4775187,-0.193  
15,63.487,rs6494120,-0.187  
15,63.627,rs8026404,-0.162  
15,63.711,rs965355,-0.100  
15,63.803,rs16941815,-0.051  
15,63.817,rs4775214,-0.045  
15,63.821,rs893272,-0.046

15,63.903,rs4519291,-0.055  
15,63.931,rs7175060,-0.056  
15,63.937,rs2912108,-0.058  
15,63.986,rs1425933,-0.072  
15,64.015,rs8025697,-0.081  
15,64.090,rs1481838,-0.077  
15,64.223,rs8026117,-0.060  
15,64.318,rs338415,-0.057  
15,64.721,rs12910118,-0.045  
15,64.778,rs2899656,-0.037  
15,64.845,rs9920533,-0.039  
15,64.847,rs3759911,-0.039  
15,64.891,rs3068,-0.036  
15,65.034,rs10431796,-0.037  
15,65.048,rs2162069,-0.038  
15,65.136,rs339996,-0.030  
15,65.141,rs339998,-0.030  
15,65.184,rs4775287,-0.007  
15,65.197,rs13329238,-0.004  
15,65.212,rs6494219,-0.002  
15,65.215,rs6494221,-0.001  
15,65.220,rs1820357,-0.000  
15,65.271,rs7164773,-0.003  
15,65.272,rs12438866,-0.003  
15,65.273,rs922782,-0.003  
15,65.356,rs7165718,-0.000  
15,65.408,rs7175883,0.000  
15,65.410,rs8042149,0.000  
15,65.497,rs10519085,0.000  
15,65.557,rs341387,0.000  
15,65.622,rs877863,-0.000  
15,65.625,rs16943299,-0.000  
15,65.640,rs2899664,-0.002  
15,65.642,rs2062091,-0.000  
15,65.656,rs6494231,-0.000  
15,65.679,rs4775319,-0.000  
15,65.681,rs10220727,-0.000  
15,65.691,rs1523527,0.000  
15,65.692,rs4775340,0.001  
15,65.696,rs10519096,0.000  
15,65.697,rs17204770,0.000  
15,65.697,rs10519099,0.000  
15,65.707,rs12443239,0.002  
15,65.713,rs10152427,0.002  
15,65.713,rs16943579,0.002  
15,65.715,rs782907,0.002  
15,65.715,rs4774386,0.002  
15,65.723,rs8032023,0.001  
15,65.727,rs1159814,-0.000  
15,65.727,rs4775362,-0.007  
15,65.734,rs1465812,-0.010  
15,65.734,rs4774388,-0.010  
15,65.740,rs10851691,-0.010  
15,65.758,rs4350520,-0.007  
15,65.767,rs7174511,-0.008  
15,65.776,rs4506837,-0.010  
15,65.779,rs12906076,-0.011  
15,65.796,rs7161784,-0.009  
15,65.798,rs4775407,-0.016  
15,65.800,rs8030303,-0.019  
15,65.804,rs4613008,-0.026

15,65.806,rs4775411,-0.025  
15,65.807,rs7166393,-0.027  
15,65.829,rs11854700,-0.034  
15,65.845,rs2243932,-0.036  
15,65.848,rs2414739,-0.036  
15,65.975,rs12909360,-0.023  
15,66.014,rs2133093,-0.036  
15,66.134,rs11635027,-0.050  
15,66.177,rs8026446,-0.066  
15,66.310,rs8033596,-0.099  
15,66.323,rs543651,-0.114  
15,66.333,rs8031441,-0.086  
15,66.340,rs16946204,-0.088  
15,66.344,rs902031,-0.088  
15,66.344,rs16946249,-0.087  
15,66.346,rs8029221,-0.087  
15,66.348,rs16946318,-0.087  
15,66.379,rs920864,-0.084  
15,66.394,rs1444407,-0.096  
15,66.416,rs16946959,-0.074  
15,66.421,rs11632075,-0.074  
15,66.422,rs809926,-0.074  
15,66.440,rs11071754,-0.072  
15,66.498,rs11632919,-0.053  
15,66.832,rs11631933,-0.029  
15,66.917,rs7169989,-0.027  
15,67.536,rs8030264,-0.025  
15,68.046,rs332271,-0.025  
15,68.437,rs11633399,-0.026  
15,68.692,rs4287512,-0.025  
15,68.772,rs16948440,-0.024  
15,68.890,rs7175761,-0.022  
15,69.228,rs920686,-0.028  
15,69.410,rs626163,-0.026  
15,69.421,rs639812,-0.026  
15,69.479,rs1442796,-0.026  
15,69.509,rs7182756,-0.019  
15,69.518,rs2280345,-0.016  
15,69.531,rs11071841,-0.012  
15,69.536,rs2277582,-0.011  
15,69.552,rs668278,-0.009  
15,69.742,rs352480,-0.011  
15,70.088,rs17810074,-0.014  
15,70.126,rs934542,-0.013  
15,70.566,rs333557,-0.009  
15,70.672,rs333583,-0.004  
15,70.760,rs8035662,-0.000  
15,70.831,rs4776735,0.000  
15,70.841,rs17241929,0.000  
15,70.882,rs12441502,0.000  
15,70.895,rs12903880,0.000  
15,70.902,rs4776752,0.000  
15,70.919,rs4776756,-0.000  
15,70.958,rs7164231,-0.001  
15,70.965,rs12904629,-0.001  
15,70.997,rs1466434,-0.001  
15,71.144,rs8040520,-0.002  
15,72.051,rs16953566,-0.030  
15,72.058,rs11857642,-0.030  
15,72.143,rs2469094,-0.028  
15,72.291,rs8024414,-0.023

15,72.327,rs11638893,-0.022  
15,72.413,rs2469141,-0.019  
15,72.421,rs8042883,-0.019  
15,72.442,rs8031639,-0.020  
15,72.621,rs755451,-0.027  
15,72.688,rs7173030,-0.029  
15,72.815,rs12906576,-0.056  
15,74.656,rs1982647,-0.155  
15,74.664,rs4306451,-0.155  
15,74.992,rs11636387,-0.159  
15,75.213,rs4777016,-0.150  
15,75.752,rs17317291,-0.131  
15,75.913,rs7172340,-0.125  
15,75.978,rs7168991,-0.122  
15,76.033,rs964691,-0.117  
15,76.057,rs898582,-0.115  
15,76.074,rs3784351,-0.133  
15,76.229,rs4777048,-0.101  
15,76.257,rs12050670,-0.081  
15,76.269,rs7169854,-0.087  
15,76.276,rs8036698,-0.136  
15,76.277,rs16952059,-0.137  
15,76.282,rs895135,-0.141  
15,76.318,rs8041354,-0.152  
15,76.338,rs990751,-0.158  
15,76.362,rs1373698,-0.153  
15,76.371,rs2007265,-0.156  
15,76.373,rs895127,-0.156  
15,76.435,rs1465997,-0.177  
15,76.484,rs11633874,-0.133  
15,76.498,rs2046925,-0.133  
15,76.548,rs10518781,-0.099  
15,76.575,rs7172123,-0.114  
15,76.585,rs4261473,-0.116  
15,76.629,rs7164503,-0.118  
15,76.857,rs1699221,-0.113  
15,76.897,rs311917,-0.116  
15,77.121,rs8038216,-0.134  
15,77.427,rs10162653,-0.119  
15,77.443,rs11853067,-0.119  
15,77.453,rs1115635,-0.121  
15,77.466,rs4777169,-0.123  
15,77.470,rs4777170,-0.124  
15,77.523,rs4777183,-0.110  
15,77.546,rs17315418,-0.119  
15,77.571,rs9788746,-0.151  
15,77.588,rs10518837,-0.162  
15,77.588,rs186248,-0.162  
15,77.591,rs12905468,-0.160  
15,77.617,rs12442208,-0.135  
15,77.635,rs305024,-0.119  
15,77.641,rs11072122,-0.156  
15,77.656,rs305002,-0.129  
15,77.679,rs2415060,-0.132  
15,77.697,rs415642,-0.130  
15,77.702,rs12591142,-0.128  
15,77.720,rs2679623,-0.120  
15,77.721,rs2415062,-0.119  
15,77.737,rs4617810,-0.115  
15,77.782,rs2415071,-0.104  
15,77.798,rs939042,-0.097

15,77.820,rs4777221,-0.092  
15,77.841,rs12594386,-0.083  
15,77.842,rs8035183,-0.082  
15,77.848,rs3743309,-0.088  
15,77.859,rs2133977,-0.099  
15,77.870,rs7162712,-0.103  
15,77.883,rs631864,-0.103  
15,77.913,rs4777236,-0.105  
15,77.927,rs869823,-0.129  
15,77.937,rs11855650,-0.105  
15,77.944,rs726193,-0.105  
15,77.956,rs10152562,-0.105  
15,77.961,rs2927401,-0.105  
15,77.978,rs7180380,-0.087  
15,77.978,rs1875329,-0.087  
15,77.984,rs8030168,-0.088  
15,78.020,rs8182084,-0.122  
15,78.076,rs1971791,-0.135  
15,78.168,rs907552,-0.155  
15,78.187,rs4357890,-0.157  
15,78.221,rs4777272,-0.154  
15,78.232,rs925481,-0.144  
15,78.252,rs12440755,-0.125  
15,78.312,rs7162398,-0.098  
15,78.370,rs1896439,-0.047  
15,78.374,rs11072220,-0.045  
15,78.378,rs1713551,-0.045  
15,78.401,rs908341,-0.070  
15,78.417,rs6494899,-0.100  
15,78.457,rs961577,-0.118  
15,78.516,rs11072268,-0.120  
15,78.571,rs12916138,-0.093  
15,78.626,rs2165488,-0.074  
15,78.689,rs1866918,-0.057  
15,78.702,rs4777391,-0.055  
15,78.703,rs8037770,-0.055  
15,78.715,rs12912393,-0.059  
15,78.757,rs7167173,-0.050  
15,78.789,rs8041762,-0.036  
15,78.814,rs4777409,-0.032  
15,78.891,rs4354882,-0.037  
15,78.916,rs950667,-0.025  
15,78.916,rs950668,-0.026  
15,78.916,rs1875415,-0.027  
15,78.924,rs12917055,-0.038  
15,79.004,rs8033791,-0.039  
15,79.154,rs7402189,-0.039  
15,80.102,rs10518987,-0.052  
15,80.119,rs16956917,-0.052  
15,80.125,rs2706460,-0.052  
15,80.134,rs16957064,-0.052  
15,80.171,rs1284049,-0.073  
15,80.190,rs7164592,-0.065  
15,80.208,rs7163504,-0.064  
15,80.226,rs1131854,-0.050  
15,80.231,rs524457,-0.051  
15,80.234,rs3784807,-0.051  
15,80.237,rs2680344,-0.051  
15,80.244,rs4362355,-0.053  
15,80.272,rs7178269,-0.056  
15,80.275,rs7497012,-0.057

15,80.276,rs11633159,-0.057  
15,80.287,rs3743098,-0.037  
15,80.289,rs17773784,-0.036  
15,80.293,rs746654,-0.043  
15,80.309,rs2304721,-0.031  
15,80.310,rs12442211,-0.031  
15,80.320,rs10851869,-0.034  
15,80.334,rs8033129,-0.030  
15,80.335,rs11635599,-0.031  
15,80.336,rs3848159,-0.030  
15,80.341,rs351223,-0.028  
15,80.347,rs9783698,-0.027  
15,80.358,rs11632698,-0.032  
15,80.745,rs2069522,-0.011  
15,80.772,rs16972486,-0.010  
15,80.831,rs6495122,-0.010  
15,80.976,rs1561893,-0.009  
15,81.626,rs11634402,-0.014  
15,81.650,rs4073214,-0.008  
15,81.717,rs4886456,-0.009  
15,81.820,rs1394125,-0.004  
15,82.579,rs17465692,-0.004  
15,82.584,rs4075475,-0.004  
15,82.787,rs12904384,-0.004  
15,83.660,rs12904553,-0.002  
15,83.840,rs11072660,-0.002  
15,83.914,rs11856808,-0.002  
15,84.277,rs4591100,-0.006  
15,84.287,rs10468064,-0.006  
15,84.740,rs12910083,-0.004  
15,84.775,rs3784327,-0.003  
15,84.831,rs1079396,-0.003  
15,84.837,rs11072732,-0.003  
15,84.888,rs2304826,-0.003  
15,84.903,rs2304824,-0.003  
15,84.917,rs17479135,-0.002  
15,84.981,rs4887017,-0.001  
15,84.986,rs11629576,-0.001  
15,85.061,rs4887024,-0.001  
15,85.103,rs7163689,-0.001  
15,85.185,rs2013580,-0.001  
15,85.288,rs2037349,-0.002  
15,85.346,rs11072761,-0.002  
15,85.346,rs11635084,-0.002  
15,85.349,rs7172878,-0.003  
15,85.394,rs7183034,-0.012  
15,85.458,rs10519198,-0.019  
15,85.489,rs2938673,-0.023  
15,85.552,rs13180,-0.026  
15,85.796,rs8192475,-0.033  
15,85.833,rs3971872,-0.034  
15,85.838,rs16970006,-0.033  
15,85.848,rs8041377,-0.033  
15,85.956,rs2277547,-0.032  
15,86.008,rs4539564,-0.032  
15,86.129,rs2870085,-0.021  
15,86.164,rs3743195,-0.037  
15,86.167,rs12914792,-0.037  
15,86.198,rs11629786,-0.062  
15,86.212,rs930538,-0.074  
15,86.228,rs1373202,-0.092

15,86.249,rs16970495,-0.079  
15,86.252,rs12911414,-0.071  
15,86.259,rs4778861,-0.072  
15,86.273,rs7174521,-0.068  
15,86.280,rs6495364,-0.067  
15,86.329,rs2102999,-0.069  
15,86.406,rs11630971,-0.108  
15,86.416,rs2010516,-0.112  
15,86.424,rs1865361,-0.115  
15,86.437,rs4779008,-0.117  
15,86.447,rs2030473,-0.116  
15,86.460,rs7183358,-0.114  
15,86.490,rs7163859,-0.101  
15,86.606,rs12905004,-0.039  
15,86.619,rs2010459,-0.039  
15,86.663,rs925114,-0.024  
15,86.693,rs4778696,-0.023  
15,86.729,rs1046582,-0.021  
15,86.823,rs1685168,-0.022  
15,86.966,rs3893384,-0.007  
15,87.035,rs12913164,0.000  
15,87.035,rs443394,0.000  
15,87.176,rs7177659,0.001  
15,87.195,rs2562744,0.000  
15,87.287,rs2562754,-0.000  
15,87.330,rs8043397,-0.001  
15,87.363,rs939970,-0.005  
15,87.382,rs7164805,-0.005  
15,87.430,rs7183862,-0.005  
15,87.458,rs10519281,-0.005  
15,87.500,rs8026959,-0.004  
15,87.513,rs2114716,-0.004  
15,87.597,rs2028120,-0.001  
15,87.624,rs4384570,-0.000  
15,87.631,rs1347648,-0.000  
15,87.647,rs920197,-0.001  
15,87.666,rs12594390,-0.001  
15,87.726,rs7178382,0.000  
15,87.778,rs12901211,0.000  
15,87.817,rs7167062,0.000  
15,87.880,rs7178949,-0.000  
15,87.930,rs11856676,-0.000  
15,88.026,rs11072927,-0.000  
15,88.030,rs11072930,-0.000  
15,88.215,rs12437679,-0.001  
15,88.219,rs3848178,-0.000  
15,88.228,rs925111,-0.002  
15,88.231,rs7174749,-0.003  
15,88.236,rs4778856,-0.002  
15,88.245,rs16972404,-0.002  
15,88.275,rs7172022,-0.002  
15,88.304,rs2135881,-0.000  
15,88.315,rs1876435,-0.001  
15,88.343,rs12905383,-0.010  
15,88.351,rs7181726,-0.011  
15,88.357,rs2271164,-0.013  
15,88.375,rs11072961,-0.013  
15,88.389,rs2903448,-0.010  
15,88.438,rs3743040,-0.004  
15,88.504,rs7174938,-0.000  
15,88.506,rs8025381,-0.003



15,88.510,rs4778871,-0.011  
15,88.511,rs7178569,-0.014  
15,88.597,rs1533055,-0.019  
15,88.652,rs7176848,-0.027  
15,88.653,rs6495544,-0.027  
15,88.771,rs4778636,-0.016  
15,88.802,rs4622471,-0.006  
15,88.827,rs12907953,-0.001  
15,88.847,rs4383094,0.000  
15,88.848,rs11634288,0.000  
15,88.877,rs8036982,0.001  
15,88.918,rs1564641,0.001  
15,88.941,rs7180338,0.001  
15,89.092,rs7168376,-0.001  
15,89.093,rs4778930,-0.002  
15,89.094,rs4778944,-0.002  
15,89.094,rs4778945,-0.002  
15,89.094,rs17258267,-0.002  
15,89.097,rs957942,-0.001  
15,89.098,rs2654227,-0.001  
15,89.098,rs2654212,0.000  
15,89.098,rs2665115,0.000  
15,89.099,rs17699249,0.000  
15,89.099,rs7179677,0.000  
15,89.113,rs11854289,0.002  
15,89.225,rs2871011,0.001  
15,89.271,rs2046071,0.001  
15,89.276,rs1256439,0.001  
15,89.288,rs7170046,0.002  
15,89.308,rs12591031,0.004  
15,89.354,rs17158916,0.015  
15,89.359,rs1491579,0.017  
15,89.370,rs2642820,0.020  
15,89.371,rs2201101,0.020  
15,89.385,rs2562769,0.021  
15,89.386,rs17158821,0.022  
15,89.391,rs2562767,0.022  
15,89.706,rs4483821,0.031  
15,90.142,rs2292188,0.029  
15,91.002,rs2020365,0.035  
15,91.438,rs10438428,0.035  
15,91.490,rs1429444,0.035  
15,91.526,rs11073778,0.033  
15,91.545,rs8037320,0.029  
15,91.559,rs1545470,0.029  
15,91.600,rs2305367,0.028  
15,91.603,rs2242047,0.028  
15,91.644,rs4980358,0.032  
15,91.652,rs11073854,0.022  
15,91.703,rs12904615,0.051  
15,91.894,rs8035516,0.045  
15,91.920,rs2342132,0.044  
15,92.457,rs4842888,0.022  
15,92.703,rs338525,0.017  
15,92.809,rs2614674,0.014  
15,92.850,rs4843114,0.011  
15,92.851,rs2344848,0.011  
15,92.879,rs7180790,0.010  
15,92.884,rs4843118,0.010  
15,92.929,rs4505260,0.007  
15,93.117,rs2028731,0.001

15,93.188,rs1444293,0.001  
15,93.490,rs1496882,0.000  
15,93.492,rs11073625,0.000  
15,93.519,rs11632388,0.000  
15,93.840,rs1807445,-0.000  
15,93.930,rs4313781,-0.000  
15,94.161,rs16977781,-0.000  
15,94.298,rs2346734,0.000  
15,94.446,rs16977913,0.003  
15,94.449,rs4608306,0.007  
15,94.542,rs1377095,0.011  
15,94.595,rs7175208,0.011  
15,94.618,rs12901259,0.017  
15,94.638,rs16977961,0.022  
15,94.657,rs12438353,0.023  
15,94.694,rs1545500,0.035  
15,94.711,rs6496365,0.036  
15,94.725,rs16978003,0.037  
15,94.791,rs4887512,0.040  
15,94.803,rs1452459,0.043  
15,94.814,rs8029467,0.045  
15,94.856,rs16978053,0.050  
15,94.862,rs9646225,0.051  
15,94.905,rs12324429,0.057  
15,94.929,rs3743039,0.060  
15,95.019,rs1433448,0.075  
15,95.259,rs10152618,0.112  
15,95.326,rs11073695,0.172  
15,95.405,rs3913351,0.189  
15,95.568,rs8031996,0.222  
15,95.592,rs13379679,0.221  
15,95.595,rs16940235,0.221  
15,95.677,rs17656890,0.221  
15,95.698,rs2606169,0.221  
15,95.721,rs6496420,0.220  
15,95.745,rs2584162,0.170  
15,95.932,rs4344707,0.259  
15,96.020,rs7173810,0.275  
15,96.121,rs8030747,0.287  
15,96.134,rs1435395,0.289  
15,96.177,rs6496448,0.302  
15,96.340,rs1461213,0.351  
15,96.377,rs8030107,0.345  
15,96.591,rs12910780,0.343  
15,96.642,rs8033396,0.341  
15,96.660,rs4887212,0.341  
15,96.724,rs744993,0.345  
15,96.746,rs11635754,0.337  
15,96.747,rs16941593,0.329  
15,96.755,rs12102144,0.299  
15,96.757,rs12899101,0.330  
15,96.796,rs1561806,0.297  
15,96.800,rs10852095,0.235  
15,96.811,rs11858902,0.233  
15,96.853,rs1372598,0.216  
15,96.855,rs2349981,0.217  
15,96.889,rs1442291,0.225  
15,97.038,rs11634144,0.271  
15,97.085,rs17196732,0.271  
15,97.185,rs10852106,0.271  
15,97.222,rs4932367,0.272

15,97.248,rs8025352,0.272  
15,97.252,rs10852109,0.272  
15,97.376,rs6496520,0.279  
15,97.483,rs7173652,0.268  
15,97.526,rs7178611,0.250  
15,97.531,rs8029334,0.248  
15,97.613,rs11073810,0.186  
15,97.725,rs11633371,0.120  
15,97.800,rs1015081,0.111  
15,97.843,rs4932438,0.088  
15,97.857,rs1042630,0.105  
15,97.875,rs8024016,0.103  
15,97.954,rs4932444,0.102  
15,97.993,rs3825992,0.096  
15,98.009,rs3784751,0.094  
15,98.070,rs8039998,0.083  
15,98.282,rs8034934,0.065  
15,98.397,rs293342,0.041  
15,98.619,rs8028123,0.036  
15,98.651,rs2283437,0.035  
15,98.676,rs2238312,0.034  
15,98.979,rs2247233,0.027  
15,99.135,rs150304,0.023  
15,99.205,rs7359232,0.033  
15,99.278,rs2075833,0.032  
15,99.372,rs1439616,0.031  
15,99.391,rs968136,0.019  
15,99.511,rs10775247,0.013  
15,99.974,rs12909844,0.001  
15,100.037,rs2305443,0.000  
15,100.056,rs10152918,0.004  
15,100.058,rs8041622,0.004  
15,100.145,rs11639336,0.010  
15,100.431,rs3853638,0.011  
15,100.584,rs1702161,0.019  
15,100.861,rs1256841,0.035  
15,100.936,rs11852297,0.041  
15,100.995,rs1317722,0.032  
15,101.229,rs11630814,0.028  
15,101.401,rs8024587,0.029  
15,101.475,rs11853144,0.028  
15,101.732,rs1543116,0.029  
15,102.427,rs2589939,0.026  
15,103.314,rs1104880,0.015  
15,103.681,rs8030486,0.012  
15,104.067,rs7175811,0.009  
15,104.150,rs389480,0.018  
15,104.278,rs7402445,0.011  
15,104.415,rs17514846,0.018  
15,105.047,rs4101133,0.035  
15,105.057,rs1972927,0.035  
15,105.102,rs17515520,0.051  
15,105.119,rs1005060,0.053  
15,105.204,rs12441109,0.068  
15,105.422,rs8034560,0.076  
15,105.571,rs2040578,0.083  
15,105.621,rs12905479,0.077  
15,106.053,rs8032397,0.063  
15,106.287,rs7178775,0.079  
15,106.396,rs10520694,0.081  
15,106.443,rs9972541,0.081

15,106.478,rs7173692,0.078  
15,106.481,rs4586406,0.078  
15,106.720,rs4489981,0.065  
15,106.835,rs11074004,0.067  
15,106.860,rs8043364,0.071  
15,106.896,rs4522399,0.077  
15,107.025,rs4932543,0.104  
15,107.090,rs7170769,0.095  
15,107.172,rs6496827,0.137  
15,107.176,rs4932552,0.127  
15,107.350,rs6496836,0.136  
15,107.377,rs4632107,0.137  
15,107.457,rs12915467,0.140  
15,107.518,rs7166187,0.143  
15,107.686,rs7178204,0.173  
15,107.845,rs4267286,0.204  
15,108.112,rs4572364,0.238  
15,108.121,rs8030496,0.241  
15,108.141,rs4290453,0.252  
15,108.218,rs975721,0.278  
15,108.472,rs4932596,0.313  
15,108.665,rs1400784,0.322  
15,108.849,rs4984341,0.326  
15,108.917,rs10520702,0.330  
15,109.504,rs207975,0.431  
15,109.702,rs2238360,0.469  
15,109.760,rs2283461,0.479  
15,109.866,rs3815318,0.490  
15,110.144,rs768882,0.473  
15,110.906,rs1479520,0.410  
15,110.930,rs8032711,0.375  
15,110.931,rs8027648,0.374  
15,110.978,rs7170129,0.278  
15,110.988,rs8037921,0.238  
15,110.992,rs4564522,0.255  
15,110.996,rs2101436,0.271  
15,110.999,rs2200674,0.270  
15,111.031,rs3931230,0.259  
15,111.058,rs1455775,0.269  
15,111.081,rs8034095,0.302  
15,111.090,rs8033207,0.303  
15,111.094,rs4238484,0.304  
15,111.095,rs7162155,0.303  
15,111.103,rs8040515,0.286  
15,111.116,rs12904825,0.237  
15,111.125,rs285705,0.240  
15,111.151,rs432364,0.252  
15,111.251,rs8038332,0.319  
15,111.264,rs7173581,0.329  
15,111.755,rs1439618,0.489  
15,111.874,rs961233,0.500  
15,112.118,rs2272461,0.507  
15,112.244,rs8042437,0.501  
15,112.319,rs11637884,0.494  
15,112.330,rs8038855,0.532  
15,112.430,rs7164440,0.613  
15,112.492,rs8030422,0.596  
15,112.577,rs3887013,0.588  
15,112.623,rs11637013,0.549  
15,112.645,rs6497019,0.535  
15,112.796,rs4396487,0.555

15,112.804,rs8025252,0.558  
15,112.836,rs7174083,0.555  
15,112.900,rs8041299,0.552  
15,112.922,rs6497026,0.540  
15,112.973,rs10459680,0.540  
15,113.022,rs733036,0.540  
15,113.109,rs8037591,0.554  
15,113.116,rs17649643,0.554  
15,113.154,rs16947539,0.553  
15,113.424,rs1872052,0.502  
15,113.465,rs723033,0.485  
15,113.561,rs9888659,0.447  
15,113.612,rs11633878,0.431  
15,113.699,rs9302365,0.447  
15,113.771,rs11857333,0.427  
15,113.826,rs8039301,0.422  
15,113.847,rs7170984,0.421  
15,113.891,rs11074155,0.420  
15,114.075,rs2128764,0.442  
15,114.123,rs8028266,0.457  
15,114.131,rs16947804,0.459  
15,114.134,rs7166968,0.460  
15,114.162,rs1384739,0.421  
15,114.163,rs1384740,0.421  
15,114.335,rs17541566,0.420  
15,114.384,rs936675,0.473  
15,114.411,rs1351721,0.475  
15,114.415,rs10520724,0.475  
15,114.457,rs11853122,0.508  
15,114.523,rs2892474,0.490  
15,114.683,rs6497069,0.517  
15,114.711,rs12904317,0.518  
15,114.785,rs1489129,0.501  
15,115.029,rs16948067,0.441  
15,115.078,rs1473491,0.443  
15,115.331,rs17615276,0.405  
15,115.478,rs4777688,0.348  
15,115.481,rs16948292,0.347  
15,115.493,rs4584771,0.346  
15,115.542,rs7170017,0.345  
15,115.566,rs4354877,0.344  
15,115.582,rs7180119,0.347  
15,115.647,rs17626899,0.366  
15,115.694,rs7182315,0.354  
15,115.841,rs11853634,0.429  
15,116.093,rs6497144,0.414  
15,116.269,rs4335731,0.409  
15,116.419,rs12914286,0.449  
15,116.571,rs12898390,0.430  
15,116.599,rs13329526,0.428  
15,116.663,rs7164887,0.423  
15,116.704,rs1031912,0.453  
15,116.728,rs1564391,0.469  
15,116.773,rs6497165,0.458  
15,116.797,rs6497167,0.490  
15,116.831,rs17628639,0.443  
15,116.840,rs8033102,0.441  
15,116.864,rs1479833,0.454  
15,116.930,rs1479836,0.418  
15,116.939,rs2219854,0.414  
15,117.001,rs2605119,0.387

15,117.026,rs7178035,0.387  
15,117.051,rs7164241,0.377  
15,117.087,rs1598490,0.354  
15,117.107,rs17711817,0.343  
15,117.109,rs2892541,0.342  
15,117.174,rs7172568,0.346  
15,117.258,rs1378591,0.368  
15,117.298,rs1563363,0.387  
15,117.301,rs12904449,0.388  
15,117.334,rs4984343,0.394  
15,117.344,rs8035826,0.399  
15,117.383,rs294547,0.378  
15,117.407,rs294558,0.314  
15,117.438,rs8024303,0.305  
15,117.462,rs10520748,0.298  
15,117.556,rs12909356,0.281  
15,117.575,rs8025603,0.279  
15,117.584,rs16974359,0.276  
15,117.635,rs2117214,0.256  
15,117.681,rs10520754,0.270  
15,117.888,rs8041166,0.204  
15,117.940,rs7173161,0.189  
15,117.989,rs11633702,0.175  
15,118.091,rs16949208,0.161  
15,118.102,rs2161936,0.160  
15,118.171,rs2291995,0.150  
15,118.327,rs2619171,0.110  
15,118.354,rs2619170,0.110  
15,118.365,rs1564326,0.108  
15,118.421,rs4381545,0.088  
15,118.443,rs7162031,0.081  
15,118.500,rs4984406,0.070  
15,118.536,rs9920469,0.062  
15,118.606,rs2219816,0.049  
15,118.622,rs8037584,0.048  
15,118.678,rs11073390,0.044  
15,118.913,rs4984590,0.034  
15,119.149,rs17635194,0.027  
15,119.223,rs9920854,0.029  
15,119.235,rs7172063,0.029  
15,119.265,rs12903810,0.027  
15,119.320,rs1563652,0.033  
15,119.346,rs8031253,0.034  
15,119.543,rs1471169,0.027  
15,119.560,rs12148851,0.028  
15,119.696,rs188324,0.030  
15,120.123,rs7176538,0.036  
15,120.163,rs17667193,0.037  
15,120.266,rs10520775,0.041  
15,120.431,rs7174577,0.025  
15,120.543,rs16975040,0.028  
15,120.776,rs11858528,0.049  
15,120.835,rs1834207,0.035  
15,120.882,rs4984577,0.034  
15,120.990,rs6496105,0.051  
15,121.063,rs2052652,0.066  
15,121.183,rs10520786,0.094  
15,121.336,rs9920471,0.125  
15,121.459,rs8036454,0.124  
15,121.476,rs1968284,0.106  
15,121.643,rs8029103,0.154

15,121.652,rs2397811,0.162  
15,121.704,rs8035878,0.213  
15,121.877,rs16975468,0.260  
15,121.880,rs11852498,0.262  
15,121.936,rs1372641,0.284  
15,122.071,rs11073446,0.281  
15,122.732,rs744738,0.261  
15,122.866,rs1369943,0.258  
15,123.037,rs955643,0.282  
15,123.088,rs7162291,0.279  
15,123.130,rs17517092,0.264  
15,123.187,rs7168486,0.286  
15,123.194,rs10520802,0.287  
15,123.214,rs16975846,0.289  
15,123.285,rs1450490,0.293  
15,123.447,rs17591838,0.259  
15,123.597,rs2044800,0.252  
15,123.610,rs6496147,0.249  
15,123.665,rs7170551,0.232  
15,123.680,rs8029545,0.217  
15,123.730,rs4374122,0.211  
15,123.769,rs7182127,0.214  
15,123.844,rs7178874,0.209  
15,123.903,rs12907607,0.214  
15,123.956,rs1007328,0.201  
15,124.010,rs8030759,0.178  
15,124.030,rs11073466,0.173  
15,124.031,rs2278510,0.173  
15,124.245,rs2589252,0.192  
15,124.251,rs2577002,0.192  
15,124.288,rs4984530,0.148  
15,124.326,rs7180721,0.147  
15,124.369,rs8033891,0.143  
15,124.527,rs3743462,0.145  
15,124.634,rs745136,0.184  
15,124.673,rs8031676,0.224  
15,124.739,rs1437753,0.211  
15,124.752,rs1837119,0.210  
15,124.814,rs1437768,0.216  
15,125.067,rs934782,0.264  
15,125.190,rs1370555,0.280  
15,125.239,rs6496172,0.286  
15,125.244,rs2398227,0.286  
15,125.300,rs7163206,0.287  
15,125.320,rs12148530,0.259  
15,125.343,rs12916220,0.260  
15,125.588,rs8038026,0.253  
15,125.750,rs4335743,0.252  
15,126.003,rs4436745,0.200  
15,126.073,rs2715792,0.200  
15,126.147,rs2895446,0.207  
15,126.212,rs4965136,0.214  
15,126.219,rs1503340,0.215  
15,126.379,rs7179800,0.269  
15,126.388,rs1011474,0.270  
15,126.439,rs8035569,0.259  
15,126.466,rs8023650,0.294  
15,127.432,rs8042425,0.258  
15,127.534,rs9672547,0.300  
15,127.552,rs4965146,0.304  
15,127.613,rs11634085,0.303

15,127.635,rs8026791,0.302  
15,127.701,rs234530,0.371  
15,127.748,rs1558389,0.364  
15,127.785,rs9806494,0.350  
15,127.878,rs1996155,0.322  
15,127.927,rs1355844,0.314  
15,128.006,rs1996142,0.291  
15,128.087,rs11854411,0.259  
15,128.165,rs12594335,0.209  
15,128.194,rs11857367,0.212  
15,128.202,rs7169879,0.213  
15,128.219,rs7181914,0.214  
15,128.473,rs4965177,0.215  
15,128.578,rs12441901,0.203  
15,128.612,rs4128671,0.199  
15,128.706,rs11638539,0.184  
15,128.752,rs6496231,0.169  
15,128.773,rs12900806,0.164  
15,128.788,rs4523904,0.163  
15,128.800,rs2088783,0.160  
15,128.851,rs11637962,0.130  
15,129.013,rs649034,0.157  
15,129.060,rs8039196,0.166  
15,129.139,rs586637,0.175  
15,129.233,rs7166685,0.166  
15,129.380,rs11073574,0.162  
15,129.537,rs12905875,0.154  
15,129.592,rs1602457,0.148  
15,129.646,rs7497359,0.143  
15,129.657,rs8035976,0.149  
15,129.713,rs4519318,0.165  
15,129.806,rs4965117,0.134  
15,129.825,rs12441858,0.099  
15,129.856,rs2130882,0.114  
15,130.016,rs7172170,0.146  
15,130.202,rs2054520,0.160  
15,130.229,rs11634680,0.121  
15,130.232,rs1383146,0.119  
15,130.290,rs7182895,0.123  
15,130.318,rs1480090,0.125  
15,130.356,rs1552047,0.101  
15,130.432,rs2311311,0.077  
15,130.524,rs1372839,0.079  
15,130.567,rs7183808,0.083  
15,130.582,rs718674,0.079  
15,130.588,rs1023781,0.081  
15,130.631,rs1542112,0.107  
15,130.646,rs7177705,0.116  
15,130.667,rs2120026,0.130  
15,130.706,rs3889766,0.118  
15,130.735,rs1442810,0.125  
15,130.815,rs9920714,0.147  
15,130.900,rs7183516,0.173  
15,131.100,rs1863273,0.196  
15,131.158,rs933812,0.235  
15,131.206,rs2311754,0.284  
15,131.214,rs7497612,0.292  
15,131.226,rs1319873,0.304  
15,131.282,rs4527002,0.340  
15,131.357,rs7179187,0.362  
15,131.436,rs4966009,0.367



15,131.457,rs1319869,0.375  
15,131.574,rs11857366,0.399  
15,131.805,rs2684761,0.372  
15,131.842,rs2670506,0.368  
15,131.883,rs1879612,0.363  
15,131.981,rs1464433,0.364  
15,132.008,rs2715417,0.365  
15,132.019,rs7169544,0.364  
15,132.020,rs3784604,0.364  
15,132.034,rs2684807,0.366  
15,132.092,rs7166565,0.315  
15,132.112,rs9672965,0.312  
15,132.298,rs2654987,0.322  
15,132.336,rs2593028,0.317  
15,132.359,rs28504,0.310  
15,132.375,rs1703794,0.363  
15,132.389,rs7165207,0.453  
15,132.412,rs4965210,0.462  
15,132.413,rs4965212,0.460  
15,132.511,rs2292288,0.450  
15,132.727,rs12901518,0.486  
15,133.002,rs8036160,0.473  
15,133.089,rs1472986,0.423  
15,133.107,rs4965476,0.408  
15,133.156,rs4965485,0.370  
15,133.344,rs2119946,0.413  
15,133.373,rs7175248,0.413  
15,133.654,rs11247118,0.332  
15,133.891,rs7175181,0.335  
15,133.966,rs2958959,0.333  
15,134.104,rs8039888,0.375  
15,134.177,rs2573632,0.396  
15,134.239,rs2581332,0.405  
15,134.314,rs1836698,0.381  
15,134.405,rs745104,0.365  
15,134.424,rs2573624,0.363  
15,134.523,rs2573660,0.406  
15,134.560,rs2727120,0.409  
15,134.624,rs1871741,0.417  
15,134.637,rs4965572,0.419  
15,134.733,rs7498060,0.452  
15,134.762,rs2199932,0.459  
15,134.833,rs8035111,0.435  
15,134.845,rs7183000,0.433  
15,134.856,rs7164647,0.445  
15,134.866,rs8037201,0.453  
15,134.868,rs9806684,0.462  
15,134.905,rs12719733,0.490  
15,134.939,rs11247165,0.566  
15,134.970,rs4419043,0.698  
15,134.972,rs6598310,0.692  
15,135.029,rs11247169,0.485  
15,135.041,rs12592822,0.474  
15,135.106,rs4965614,0.449  
15,135.149,rs4965303,0.434  
15,135.222,rs11638887,0.456  
15,135.246,rs4965637,0.462  
15,135.368,rs7181754,0.465  
15,135.718,rs8041714,0.442  
15,135.725,rs4580136,0.440  
15,135.801,rs7166031,0.441

15,135.804,rs12460,0.442  
15,135.874,rs7177883,0.472  
15,135.917,rs4965685,0.490  
15,135.980,rs7168512,0.469  
15,136.008,rs4965327,0.446  
15,136.032,rs9806219,0.422  
15,136.057,rs7166489,0.419  
15,136.079,rs1689954,0.387  
15,136.120,rs1661812,0.351  
15,136.130,rs304110,0.343  
15,136.192,rs8043261,0.350  
15,136.214,rs7169514,0.356  
15,136.255,rs1465936,0.367  
15,136.322,rs10902583,0.366  
15,136.445,rs3803438,0.361  
15,136.453,rs4965732,0.361  
15,136.571,rs4646680,0.362  
15,136.585,rs3803428,0.363  
15,136.617,rs7181644,0.363  
15,136.732,rs8038607,0.371  
15,136.733,rs12915954,0.371  
15,136.807,rs1993375,0.382  
15,136.925,rs17744500,0.446  
15,137.021,rs12903939,0.546  
15,137.024,rs11630047,0.560  
15,137.039,rs11635137,0.611  
15,137.056,rs2305569,0.551  
15,137.086,rs2412132,0.514  
15,137.130,rs2045161,0.524  
15,137.152,rs1809180,0.586  
15,137.172,rs1807833,0.590  
15,137.181,rs2168188,0.588  
15,137.224,rs13329644,0.592  
15,137.234,rs2012387,0.592  
15,137.310,rs12148369,0.592  
15,137.404,rs2101171,0.596  
15,137.476,rs12102173,0.600  
15,137.560,rs2086678,0.611  
15,137.587,rs2949,0.625  
15,137.659,rs3825915,0.647  
15,137.661,rs3784491,0.642  
15,137.671,rs1135911,0.656  
15,137.673,rs10152164,0.660  
15,137.684,rs6598465,0.637  
15,137.689,rs4965381,0.636  
15,137.706,rs1874274,0.636  
15,137.718,rs3784463,0.666  
15,137.727,rs3825901,0.660  
15,137.763,rs7168655,0.742  
15,137.764,rs7169026,0.743  
15,137.776,rs3825896,0.754  
15,137.793,rs11638957,0.782  
15,137.865,rs4965877,0.756  
15,137.891,rs7165891,0.769  
15,137.895,rs8043067,0.773  
15,137.948,rs7166024,0.829  
15,137.986,rs7172127,0.811  
15,137.996,rs2084148,0.792  
15,138.012,rs11636460,0.840  
15,138.028,rs1011160,0.841  
15,138.059,rs1562253,0.848

15,138.065,rs8039456,0.850  
15,138.086,rs1446120,0.841  
15,138.121,rs12902757,0.835  
15,138.680,rs7182651,0.889  
15,138.755,rs7180508,0.882  
16,1.140,rs216590,0.301  
16,1.178,rs2857998,0.306  
16,1.199,rs2562185,0.271  
16,1.360,rs3918352,0.249  
16,1.499,rs6600191,0.249  
16,1.693,rs7359414,0.230  
16,2.096,rs3852766,0.186  
16,2.358,rs7206751,0.164  
16,2.419,rs4984890,0.150  
16,2.702,rs3752496,0.108  
16,2.765,rs6597,0.099  
16,2.965,rs12102635,0.094  
16,2.992,rs3764246,0.093  
16,3.101,rs2294451,0.104  
16,3.151,rs11864684,0.112  
16,3.190,rs2076237,0.115  
16,3.260,rs4984946,0.113  
16,3.395,rs760560,0.096  
16,3.527,rs402605,0.117  
16,3.649,rs2072042,0.138  
16,3.687,rs554929,0.101  
16,3.757,rs372196,0.103  
16,3.850,rs4989483,0.124  
16,3.851,rs4989489,0.125  
16,3.874,rs11644051,0.150  
16,3.911,rs550713,0.159  
16,3.993,rs533184,0.203  
16,4.198,rs11640796,0.217  
16,4.559,rs4984803,0.328  
16,4.706,rs2294605,0.349  
16,4.992,rs742408,0.414  
16,5.006,rs12934261,0.409  
16,5.088,rs13336428,0.412  
16,5.115,rs2745106,0.374  
16,5.210,rs2235639,0.412  
16,5.806,rs12920634,0.370  
16,6.117,rs12325282,0.378  
16,6.408,rs9928312,0.376  
16,6.589,rs2286469,0.413  
16,6.636,rs12596630,0.396  
16,6.661,rs8051338,0.384  
16,6.702,rs11876,0.363  
16,6.782,rs7190284,0.374  
16,7.014,rs35785,0.378  
16,7.155,rs26828,0.378  
16,7.332,rs155243,0.368  
16,7.486,rs323073,0.344  
16,7.569,rs17135889,0.300  
16,7.662,rs4238908,0.304  
16,8.342,rs11645410,0.334  
16,8.356,rs11642384,0.348  
16,8.378,rs3094471,0.368  
16,8.510,rs2240140,0.335  
16,8.679,rs8054377,0.245  
16,8.685,rs3810801,0.272  
16,8.818,rs9673618,0.289

16,8.857,rs9935192,0.280  
16,8.922,rs734138,0.294  
16,9.144,rs10431961,0.294  
16,9.227,rs12919933,0.348  
16,9.440,rs172787,0.459  
16,9.479,rs8044035,0.468  
16,9.502,rs8047557,0.471  
16,9.590,rs224218,0.425  
16,9.746,rs11645952,0.425  
16,9.758,rs6501170,0.416  
16,9.830,rs7196196,0.536  
16,9.833,rs129988,0.521  
16,9.854,rs2191416,0.413  
16,9.910,rs129968,0.405  
16,9.966,rs11076786,0.404  
16,10.021,rs3025697,0.400  
16,10.248,rs2239316,0.389  
16,10.382,rs12446940,0.425  
16,10.463,rs17256169,0.451  
16,10.470,rs7197403,0.452  
16,10.474,rs2601773,0.452  
16,10.513,rs2238439,0.432  
16,10.515,rs2230739,0.394  
16,10.524,rs11649287,0.404  
16,10.539,rs11647828,0.394  
16,10.616,rs7204987,0.457  
16,10.645,rs7193552,0.465  
16,10.694,rs2531999,0.469  
16,10.724,rs4786461,0.472  
16,10.729,rs81647,0.470  
16,10.734,rs233178,0.467  
16,10.787,rs8051399,0.419  
16,10.798,rs12324980,0.411  
16,10.803,rs6500586,0.407  
16,10.803,rs11076825,0.407  
16,10.822,rs8046435,0.423  
16,10.832,rs1291717,0.429  
16,10.840,rs2386885,0.422  
16,10.908,rs251742,0.431  
16,10.967,rs17136962,0.457  
16,11.120,rs1291695,0.470  
16,11.238,rs11645060,0.494  
16,11.241,rs17137037,0.494  
16,11.525,rs6500619,0.479  
16,11.738,rs1684618,0.516  
16,12.033,rs9931084,0.662  
16,12.065,rs1876359,0.663  
16,12.139,rs4038782,0.628  
16,12.196,rs2908654,0.642  
16,12.247,rs7191632,0.668  
16,12.257,rs2908646,0.623  
16,12.328,rs2270256,0.599  
16,12.338,rs7110,0.653  
16,12.405,rs2270834,0.628  
16,12.405,rs9925239,0.627  
16,12.430,rs8047337,0.601  
16,12.563,rs12447373,0.475  
16,12.656,rs4786640,0.407  
16,12.661,rs12927295,0.443  
16,12.735,rs4786015,0.409  
16,12.926,rs938760,0.288

16,13.054,rs490662,0.237  
16,13.190,rs4238859,0.203  
16,13.246,rs12932771,0.155  
16,13.259,rs8058856,0.150  
16,13.283,rs4592658,0.161  
16,13.340,rs11640110,0.178  
16,13.365,rs6500699,0.172  
16,13.414,rs7187482,0.161  
16,13.455,rs1011489,0.152  
16,13.659,rs972843,0.084  
16,13.660,rs12597267,0.084  
16,13.674,rs9934123,0.084  
16,13.734,rs7199938,0.097  
16,13.803,rs1865815,0.113  
16,13.836,rs4786780,0.095  
16,13.879,rs7186318,0.090  
16,13.914,rs1529917,0.083  
16,13.921,rs7201619,0.101  
16,13.952,rs8050728,0.100  
16,14.031,rs1821694,0.088  
16,14.107,rs4786069,0.129  
16,14.176,rs12446152,0.208  
16,14.205,rs13330260,0.247  
16,14.300,rs8050038,0.266  
16,14.375,rs2880608,0.241  
16,14.435,rs2109029,0.293  
16,14.449,rs8057452,0.290  
16,14.506,rs13335835,0.293  
16,14.557,rs2014475,0.306  
16,14.598,rs2343582,0.275  
16,14.643,rs17139127,0.256  
16,14.763,rs2035591,0.228  
16,14.789,rs17139207,0.224  
16,14.963,rs1035564,0.208  
16,15.001,rs4146812,0.205  
16,15.002,rs9937132,0.205  
16,15.006,rs13337849,0.206  
16,15.136,rs889701,0.228  
16,15.223,rs1424121,0.204  
16,15.240,rs12934851,0.199  
16,15.464,rs6500760,0.189  
16,15.703,rs17139483,0.161  
16,15.799,rs8046027,0.143  
16,15.865,rs7189603,0.143  
16,16.082,rs11077014,0.163  
16,16.110,rs1362315,0.173  
16,16.201,rs17817199,0.204  
16,16.413,rs1861188,0.183  
16,16.569,rs12102452,0.195  
16,16.672,rs12598169,0.200  
16,16.755,rs2191420,0.170  
16,16.874,rs8048522,0.200  
16,16.898,rs9931078,0.227  
16,16.907,rs2109457,0.221  
16,17.088,rs9652638,0.206  
16,17.191,rs4337300,0.200  
16,17.297,rs813913,0.180  
16,17.304,rs2159549,0.178  
16,17.370,rs9931202,0.158  
16,17.418,rs1476977,0.144  
16,17.524,rs1833172,0.131

16,17.639,rs11640341,0.125  
16,17.791,rs10492841,0.163  
16,17.839,rs2110342,0.207  
16,17.857,rs7201323,0.162  
16,17.857,rs7196961,0.162  
16,17.858,rs12932732,0.161  
16,17.861,rs12935093,0.156  
16,17.881,rs11645845,0.137  
16,17.889,rs8047060,0.134  
16,17.907,rs12934762,0.139  
16,17.907,rs9923210,0.138  
16,17.927,rs7200839,0.123  
16,17.933,rs6500842,0.118  
16,17.954,rs6500848,0.110  
16,17.986,rs2172308,0.103  
16,18.000,rs6500870,0.099  
16,18.041,rs12103087,0.106  
16,18.065,rs12923619,0.110  
16,18.121,rs11864504,0.105  
16,18.139,rs12925428,0.124  
16,18.163,rs11643737,0.132  
16,18.246,rs12709169,0.148  
16,18.308,rs11866781,0.163  
16,18.332,rs1382478,0.161  
16,18.374,rs8046633,0.155  
16,18.423,rs17559799,0.164  
16,18.469,rs12447219,0.163  
16,18.475,rs2127065,0.163  
16,18.510,rs12599645,0.161  
16,18.561,rs10500350,0.161  
16,18.963,rs11639540,0.159  
16,19.197,rs8050740,0.163  
16,19.306,rs17563428,0.148  
16,19.420,rs11647224,0.132  
16,19.453,rs12920363,0.129  
16,19.615,rs2048093,0.114  
16,19.701,rs7196597,0.103  
16,19.749,rs1507031,0.099  
16,19.830,rs17144160,0.111  
16,19.863,rs6500988,0.115  
16,20.033,rs3785229,0.125  
16,20.106,rs7198717,0.125  
16,20.148,rs6501005,0.141  
16,20.171,rs3785222,0.131  
16,20.205,rs740676,0.118  
16,20.224,rs3785215,0.119  
16,20.299,rs2058186,0.123  
16,20.325,rs8061577,0.118  
16,20.392,rs8056138,0.108  
16,20.406,rs881562,0.102  
16,20.470,rs984606,0.099  
16,20.493,rs1014124,0.102  
16,20.630,rs12447438,0.115  
16,20.878,rs11077231,0.121  
16,21.047,rs4608356,0.118  
16,21.229,rs8044765,0.097  
16,21.250,rs4464062,0.095  
16,21.338,rs8054510,0.118  
16,21.595,rs4787108,0.128  
16,21.752,rs7193708,0.097  
16,21.772,rs3112655,0.094

16,21.782,rs6501060,0.096  
16,22.220,rs9923791,0.083  
16,22.347,rs1451595,0.088  
16,22.405,rs12596707,0.099  
16,22.669,rs4346186,0.130  
16,22.701,rs8057314,0.165  
16,22.750,rs1868970,0.174  
16,22.785,rs17145648,0.166  
16,22.822,rs1015990,0.150  
16,22.862,rs8053368,0.155  
16,23.112,rs7500432,0.108  
16,23.148,rs9934899,0.126  
16,23.149,rs4488430,0.126  
16,23.168,rs764681,0.129  
16,23.185,rs2361075,0.126  
16,23.234,rs8063560,0.103  
16,23.247,rs9933436,0.097  
16,23.254,rs12929740,0.095  
16,23.280,rs11860880,0.088  
16,23.340,rs4354918,0.069  
16,23.387,rs7187729,0.070  
16,23.496,rs2312949,0.074  
16,23.588,rs4985110,0.074  
16,23.610,rs12921061,0.093  
16,23.617,rs11646372,0.094  
16,23.667,rs2313427,0.103  
16,23.681,rs1731083,0.106  
16,23.697,rs1641003,0.109  
16,23.705,rs1731017,0.091  
16,23.745,rs9937726,0.090  
16,23.751,rs12930556,0.090  
16,23.791,rs3785176,0.105  
16,23.809,rs8057024,0.113  
16,24.049,rs12923049,0.060  
16,24.083,rs4438302,0.071  
16,24.109,rs899258,0.056  
16,24.126,rs12598117,0.049  
16,24.159,rs7184991,0.041  
16,24.251,rs7186634,0.039  
16,24.274,rs9926522,0.043  
16,24.368,rs2965831,0.054  
16,24.379,rs4781512,0.055  
16,24.379,rs2941333,0.055  
16,24.496,rs4780910,0.081  
16,24.549,rs631208,0.079  
16,24.570,rs837346,0.077  
16,24.657,rs837356,0.078  
16,24.661,rs12598159,0.078  
16,24.701,rs9928435,0.073  
16,24.726,rs249276,0.071  
16,24.770,rs1428798,0.066  
16,24.849,rs10492846,0.070  
16,24.908,rs1074042,0.073  
16,24.910,rs9921476,0.073  
16,24.911,rs2080273,0.073  
16,24.938,rs722008,0.072  
16,24.943,rs12445475,0.072  
16,24.950,rs11074352,0.071  
16,24.961,rs316374,0.069  
16,24.967,rs16966016,0.068  
16,24.971,rs7186415,0.053

16,24.983,rs11866237,0.058  
16,24.996,rs1972578,0.063  
16,24.998,rs8055473,0.063  
16,25.003,rs11639516,0.076  
16,25.103,rs1548808,0.038  
16,25.162,rs884918,0.030  
16,25.168,rs6497599,0.029  
16,25.464,rs1078695,0.026  
16,25.508,rs1448254,0.025  
16,25.836,rs1070502,0.016  
16,26.122,rs9938544,0.011  
16,26.273,rs7201055,0.014  
16,26.316,rs13332694,0.018  
16,26.426,rs1065832,0.047  
16,26.501,rs194332,0.038  
16,26.521,rs12449282,0.036  
16,26.757,rs1234923,0.029  
16,26.931,rs10153114,0.016  
16,27.040,rs11859719,0.009  
16,27.049,rs12443943,0.009  
16,27.588,rs1970817,0.039  
16,27.616,rs12597384,0.040  
16,27.616,rs16957347,0.040  
16,27.690,rs3790126,0.036  
16,27.704,rs6498070,0.038  
16,27.735,rs8047864,0.054  
16,27.741,rs1104833,0.058  
16,27.773,rs7190235,0.086  
16,27.829,rs1111493,0.123  
16,27.851,rs4780959,0.127  
16,27.918,rs6498098,0.127  
16,28.017,rs2719726,0.128  
16,28.091,rs4780986,0.147  
16,28.126,rs2541467,0.176  
16,28.167,rs1641788,0.221  
16,28.172,rs8055253,0.220  
16,28.188,rs9939578,0.214  
16,28.197,rs9937956,0.222  
16,28.200,rs8048199,0.223  
16,28.210,rs10431909,0.185  
16,28.236,rs4781016,0.229  
16,28.250,rs4072865,0.204  
16,28.351,rs2041733,0.181  
16,28.434,rs794433,0.148  
16,28.460,rs705904,0.151  
16,28.529,rs243324,0.151  
16,28.584,rs7206320,0.155  
16,28.692,rs8056559,0.184  
16,28.702,rs12448800,0.192  
16,28.709,rs4076823,0.219  
16,28.729,rs4781083,0.234  
16,28.736,rs8061112,0.254  
16,28.739,rs8047291,0.259  
16,28.745,rs11074982,0.281  
16,28.762,rs4781091,0.283  
16,28.796,rs12929140,0.285  
16,28.851,rs4781110,0.288  
16,28.877,rs8052942,0.282  
16,28.887,rs6498215,0.283  
16,28.895,rs11646835,0.249  
16,28.910,rs12918743,0.293



16,28.915,rs7204801,0.296  
16,28.948,rs3743582,0.292  
16,28.989,rs1345442,0.259  
16,29.019,rs753988,0.251  
16,29.094,rs9927281,0.251  
16,29.095,rs2868980,0.251  
16,29.120,rs1050049,0.243  
16,29.175,rs1592572,0.224  
16,29.261,rs10492854,0.205  
16,29.284,rs8061475,0.194  
16,29.382,rs154148,0.156  
16,29.458,rs464017,0.156  
16,29.510,rs7185307,0.155  
16,29.581,rs16959252,0.152  
16,29.603,rs11861545,0.148  
16,29.659,rs7186239,0.165  
16,29.755,rs1035579,0.194  
16,29.842,rs7206244,0.210  
16,29.954,rs13336229,0.193  
16,29.964,rs16959796,0.217  
16,29.965,rs1641831,0.219  
16,29.972,rs4781243,0.248  
16,30.018,rs1641894,0.231  
16,30.119,rs10852352,0.236  
16,30.123,rs755685,0.236  
16,30.217,rs17226949,0.186  
16,30.221,rs890883,0.185  
16,30.297,rs1612572,0.201  
16,30.302,rs10468253,0.209  
16,30.316,rs2059819,0.221  
16,30.348,rs8056212,0.216  
16,30.385,rs755214,0.206  
16,30.389,rs1622135,0.208  
16,30.422,rs1627143,0.215  
16,30.576,rs2865625,0.268  
16,30.645,rs16960659,0.295  
16,30.648,rs4513082,0.296  
16,30.724,rs16960741,0.298  
16,30.789,rs7201919,0.300  
16,30.821,rs4238618,0.297  
16,30.909,rs8060233,0.277  
16,31.256,rs2173865,0.316  
16,31.281,rs4780494,0.347  
16,31.330,rs11859818,0.343  
16,31.362,rs276625,0.346  
16,31.492,rs401326,0.341  
16,31.506,rs4553616,0.335  
16,31.549,rs1123220,0.314  
16,31.663,rs153098,0.343  
16,31.764,rs436812,0.319  
16,31.791,rs204034,0.312  
16,31.791,rs16961456,0.312  
16,31.810,rs11647787,0.311  
16,31.852,rs4780514,0.304  
16,31.865,rs8058023,0.305  
16,32.059,rs16961712,0.354  
16,32.220,rs734826,0.395  
16,32.364,rs11642207,0.406  
16,32.567,rs11864841,0.367  
16,32.602,rs1894380,0.360  
16,32.615,rs8056716,0.352

16,32.633,rs1547402,0.341  
16,32.729,rs12102475,0.340  
16,32.768,rs7184684,0.325  
16,33.044,rs179596,0.372  
16,33.199,rs11861769,0.361  
16,33.258,rs1034392,0.337  
16,33.276,rs16962919,0.330  
16,33.323,rs16962967,0.332  
16,33.379,rs1029290,0.335  
16,33.420,rs11865632,0.347  
16,33.479,rs8054265,0.358  
16,33.612,rs3136166,0.339  
16,33.848,rs1794236,0.309  
16,33.872,rs12599691,0.274  
16,34.421,rs7194165,0.281  
16,34.448,rs9889180,0.283  
16,34.471,rs8051081,0.289  
16,34.476,rs878340,0.291  
16,34.521,rs7499658,0.291  
16,34.561,rs17198566,0.324  
16,34.562,rs12599053,0.332  
16,34.564,rs16963706,0.396  
16,34.564,rs11075236,0.397  
16,34.572,rs1000174,0.348  
16,34.673,rs4782165,0.327  
16,34.873,rs4780754,0.316  
16,35.930,rs222130,0.307  
16,36.166,rs12449163,0.288  
16,36.872,rs13333250,0.103  
16,36.971,rs11649527,0.093  
16,37.061,rs4074171,0.085  
16,37.065,rs8051794,0.085  
16,37.107,rs4496122,0.081  
16,37.202,rs12918362,0.080  
16,37.360,rs6498657,0.080  
16,37.433,rs8061749,0.079  
16,37.683,rs12933150,0.065  
16,37.689,rs4782029,0.065  
16,37.690,rs9940419,0.081  
16,37.770,rs7206558,0.078  
16,37.824,rs7202731,0.063  
16,37.835,rs17210682,0.061  
16,37.841,rs7193856,0.062  
16,37.871,rs722074,0.068  
16,37.953,rs2045498,0.060  
16,37.976,rs7206651,0.057  
16,37.984,rs12598653,0.063  
16,37.987,rs12449229,0.065  
16,38.104,rs6498703,0.104  
16,38.153,rs1465465,0.118  
16,38.160,rs4613050,0.121  
16,38.185,rs7194068,0.129  
16,38.221,rs4255769,0.118  
16,38.276,rs11075365,0.096  
16,38.435,rs12596653,0.100  
16,38.458,rs11075375,0.089  
16,38.472,rs1565774,0.083  
16,38.627,rs4780669,0.144  
16,38.676,rs12051327,0.130  
16,38.853,rs7201086,0.163  
16,38.908,rs2158231,0.174

16,38.953,rs12596708,0.189  
16,39.121,rs173236,0.267  
16,39.129,rs1428097,0.267  
16,39.209,rs8046090,0.200  
16,40.203,rs9934555,0.320  
16,40.208,rs4432257,0.321  
16,40.413,rs4438288,0.336  
16,40.918,rs4536454,0.322  
16,40.991,rs3743955,0.317  
16,41.064,rs9938775,0.324  
16,41.133,rs1017316,0.318  
16,41.235,rs8060055,0.301  
16,41.289,rs16971672,0.292  
16,41.373,rs12929451,0.264  
16,41.405,rs229007,0.236  
16,41.492,rs12925834,0.164  
16,41.536,rs2352983,0.138  
16,41.539,rs916768,0.156  
16,41.540,rs2269790,0.162  
16,41.573,rs3785351,0.155  
16,41.685,rs2269793,0.106  
16,41.812,rs1023442,0.105  
16,41.820,rs2097266,0.104  
16,41.829,rs7194009,0.122  
16,41.834,rs4457974,0.120  
16,41.855,rs727187,0.114  
16,41.916,rs8049383,0.108  
16,41.918,rs11640726,0.107  
16,41.925,rs12935562,0.107  
16,41.958,rs1858972,0.103  
16,41.966,rs16969473,0.102  
16,42.033,rs2764754,0.093  
16,42.076,rs12447513,0.093  
16,42.096,rs9925119,0.070  
16,42.208,rs8059941,0.058  
16,42.218,rs7191955,0.062  
16,42.229,rs9927608,0.067  
16,42.257,rs4476181,0.091  
16,42.259,rs9922144,0.062  
16,42.315,rs11074450,0.097  
16,42.402,rs9652589,0.168  
16,42.444,rs11646919,0.195  
16,42.470,rs7187470,0.270  
16,42.507,rs7498385,0.243  
16,43.093,rs2285834,0.267  
16,43.121,rs11074476,0.267  
16,43.202,rs4783513,0.265  
16,43.309,rs172958,0.242  
16,43.495,rs8055894,0.208  
16,43.534,rs2075521,0.196  
16,43.555,rs741720,0.217  
16,43.559,rs9929374,0.218  
16,43.566,rs17764140,0.207  
16,43.571,rs9933675,0.202  
16,43.583,rs8057454,0.190  
16,44.127,rs741718,0.080  
16,44.146,rs8054407,0.078  
16,44.671,rs6497575,0.101  
16,44.835,rs8062706,0.086  
16,45.328,rs8045314,0.055  
16,45.338,rs687852,0.068

16,45.344,rs154545,0.066  
16,45.403,rs209440,0.046  
16,45.408,rs724466,0.032  
16,45.410,rs11647526,0.031  
16,45.432,rs150355,0.021  
16,45.440,rs2239331,0.017  
16,45.445,rs208954,0.017  
16,45.455,rs12932314,0.017  
16,45.459,rs169660,0.025  
16,45.485,rs208965,0.013  
16,45.519,rs916670,0.014  
16,45.549,rs208633,0.009  
16,45.573,rs13331654,0.003  
16,45.580,rs24656,0.002  
16,45.591,rs8047644,0.005  
16,45.771,rs4357942,-0.000  
16,45.847,rs2887481,-0.005  
16,45.879,rs17841809,-0.004  
16,45.913,rs152745,-0.003  
16,45.923,rs238551,-0.001  
16,46.213,rs420259,-0.000  
16,46.253,rs17806253,-0.000  
16,46.339,rs7500128,-0.000  
16,46.352,rs8058610,-0.000  
16,46.649,rs2520027,0.001  
16,46.840,rs11645672,0.003  
16,46.872,rs9924860,0.003  
16,47.098,rs196008,0.005  
16,47.203,rs11859534,0.013  
16,47.214,rs9938849,0.022  
16,47.217,rs4788423,0.022  
16,47.295,rs3785383,0.026  
16,47.337,rs1976194,0.026  
16,47.396,rs9929918,0.019  
16,47.459,rs880824,0.025  
16,47.532,rs9937112,0.046  
16,47.534,rs2283540,0.048  
16,47.553,rs169143,0.057  
16,47.743,rs198178,0.023  
16,47.802,rs198174,0.018  
16,47.811,rs12444655,0.021  
16,47.841,rs4787924,0.020  
16,47.863,rs9940796,0.011  
16,47.901,rs991910,0.015  
16,47.906,rs2283551,0.015  
16,47.944,rs2107118,0.014  
16,47.968,rs2238510,0.018  
16,47.971,rs7187560,0.020  
16,47.988,rs4787985,0.032  
16,48.006,rs12596171,0.031  
16,48.016,rs12149602,0.031  
16,48.048,rs2189290,0.036  
16,48.051,rs9929254,0.036  
16,48.100,rs11074618,0.044  
16,48.133,rs985729,0.044  
16,48.285,rs9930580,0.042  
16,48.313,rs271008,0.041  
16,48.388,rs11649538,0.043  
16,48.396,rs8055948,0.043  
16,48.443,rs3848388,0.046  
16,48.491,rs8059655,0.040

16,48.499,rs17831015,0.041  
16,48.499,rs2033219,0.041  
16,48.520,rs4787646,0.041  
16,48.550,rs802761,0.053  
16,48.593,rs9922232,0.051  
16,48.605,rs7185291,0.052  
16,48.759,rs12923918,0.067  
16,48.824,rs274068,0.072  
16,48.852,rs17178990,0.074  
16,48.854,rs4788437,0.074  
16,48.898,rs16974249,0.058  
16,49.007,rs4787673,0.028  
16,49.060,rs6497790,0.019  
16,49.064,rs16974369,0.019  
16,49.088,rs11642659,0.017  
16,49.186,rs4787697,0.016  
16,49.211,rs962974,0.016  
16,49.502,rs8054701,0.015  
16,49.514,rs2023657,0.015  
16,49.807,rs205153,0.025  
16,49.830,rs205138,0.026  
16,49.918,rs185840,0.027  
16,49.925,rs12932661,0.037  
16,49.949,rs2943313,0.037  
16,50.053,rs2881210,0.036  
16,50.078,rs8055371,0.034  
16,50.089,rs11074709,0.026  
16,50.144,rs17774701,0.017  
16,50.188,rs12325368,0.011  
16,50.193,rs3935368,0.011  
16,50.210,rs7190796,0.008  
16,50.233,rs4319768,0.010  
16,50.257,rs11861610,0.015  
16,50.261,rs9933121,0.015  
16,50.325,rs8061067,0.015  
16,50.353,rs7205880,0.012  
16,50.361,rs8061432,0.018  
16,50.400,rs4381608,0.003  
16,50.435,rs7193424,0.004  
16,50.468,rs4592663,0.011  
16,50.486,rs13336538,0.006  
16,50.492,rs11640710,0.006  
16,50.585,rs11643971,0.002  
16,50.605,rs8050110,0.006  
16,50.627,rs4787792,0.005  
16,50.649,rs11074737,0.005  
16,50.655,rs4073229,0.005  
16,50.666,rs7191801,0.004  
16,50.729,rs3925102,0.004  
16,50.773,rs4787807,0.001  
16,50.830,rs4363867,0.004  
16,50.908,rs6497923,0.001  
16,50.939,rs12924282,0.000  
16,50.999,rs11860466,-0.001  
16,51.141,rs3112543,-0.010  
16,51.640,rs2188347,-0.037  
16,51.678,rs7206138,-0.027  
16,51.711,rs11864624,-0.040  
16,51.739,rs6497953,-0.035  
16,51.762,rs12924567,-0.031  
16,51.794,rs17705164,-0.019

16,51.812,rs11863159,-0.013  
16,51.831,rs171064,-0.009  
16,51.844,rs1858880,-0.007  
16,51.853,rs2520117,-0.009  
16,51.860,rs1363766,-0.011  
16,51.962,rs918553,-0.006  
16,52.023,rs237142,-0.004  
16,52.150,rs8051803,-0.004  
16,52.172,rs10492806,-0.005  
16,52.354,rs4787384,-0.006  
16,52.397,rs12444717,-0.006  
16,52.543,rs9921777,-0.002  
16,52.639,rs12102836,0.000  
16,52.650,rs493110,0.001  
16,52.668,rs474503,0.001  
16,52.676,rs638422,0.001  
16,52.686,rs1862686,0.001  
16,52.731,rs64493,0.001  
16,52.820,rs195888,0.000  
16,52.837,rs2188777,0.000  
16,52.879,rs723875,-0.000  
16,53.035,rs4072945,-0.006  
16,53.049,rs9806952,-0.014  
16,53.116,rs4238945,-0.022  
16,53.195,rs6497984,-0.031  
16,53.252,rs4787896,-0.008  
16,53.259,rs1515879,-0.007  
16,53.292,rs11860481,-0.005  
16,53.334,rs11641709,-0.003  
16,53.383,rs11823,-0.005  
16,53.389,rs11074843,-0.008  
16,53.392,rs4787915,-0.006  
16,53.412,rs10521142,-0.005  
16,53.434,rs12925084,-0.000  
16,53.444,rs2347935,0.003  
16,53.445,rs17720179,0.003  
16,53.448,rs4427807,0.004  
16,53.462,rs6498001,0.000  
16,53.488,rs4414501,0.001  
16,53.552,rs1801275,0.007  
16,53.552,rs1049631,0.007  
16,53.560,rs7191188,0.007  
16,53.574,rs2189521,0.005  
16,53.587,rs9930086,0.000  
16,53.591,rs3093308,0.000  
16,53.597,rs3093363,-0.000  
16,53.605,rs7184872,-0.000  
16,53.626,rs11648096,-0.000  
16,53.785,rs11644502,-0.000  
16,53.790,rs16976984,0.000  
16,53.792,rs772859,0.000  
16,53.809,rs1645333,0.002  
16,53.811,rs1363749,0.003  
16,53.826,rs11646943,0.002  
16,53.856,rs705919,0.000  
16,53.861,rs705917,0.000  
16,53.873,rs933664,-0.000  
16,53.876,rs1862452,-0.000  
16,53.904,rs6498053,-0.000  
16,53.912,rs4788025,-0.001  
16,53.923,rs205371,-0.005

16,53.938,rs205389,-0.010  
16,53.957,rs205428,-0.024  
16,53.992,rs9930464,-0.029  
16,54.085,rs12596562,-0.041  
16,54.096,rs4255791,-0.043  
16,54.127,rs9939450,-0.046  
16,54.170,rs12444319,-0.048  
16,54.460,rs151229,-0.069  
16,54.940,rs3922668,-0.103  
16,54.942,rs4788114,-0.103  
16,54.972,rs7201546,-0.107  
16,54.998,rs3935714,-0.112  
16,55.208,rs252308,-0.119  
16,55.281,rs11150713,-0.122  
16,55.320,rs767812,-0.151  
16,55.725,rs11859842,-0.183  
16,55.761,rs12596308,-0.186  
16,55.974,rs3815822,-0.223  
16,56.229,rs8049837,-0.246  
16,56.277,rs11865086,-0.251  
16,56.703,rs1064524,-0.288  
16,56.731,rs2073917,-0.290  
16,56.749,rs4243233,-0.314  
16,56.812,rs3925075,-0.283  
16,56.816,rs1140195,-0.241  
16,56.823,rs11646911,-0.184  
16,56.836,rs11866987,-0.158  
16,56.836,rs1534507,-0.158  
16,56.856,rs8056358,-0.147  
16,57.038,rs11648801,-0.155  
16,57.072,rs345551,-0.156  
16,57.089,rs7203265,-0.157  
16,58.388,rs3095627,-0.207  
16,58.708,rs16945493,-0.224  
16,59.034,rs494116,-0.272  
16,59.047,rs546791,-0.273  
16,59.081,rs6500338,-0.278  
16,59.581,rs8053839,-0.368  
16,59.674,rs12386020,-0.386  
16,59.830,rs1872656,-0.403  
16,59.841,rs4315324,-0.403  
16,60.018,rs7203159,-0.306  
16,60.040,rs6500419,-0.298  
16,60.052,rs3095653,-0.327  
16,60.134,rs6500206,-0.227  
16,60.153,rs1420585,-0.190  
16,60.172,rs12148960,-0.185  
16,60.185,rs10852588,-0.182  
16,60.193,rs1558760,-0.192  
16,60.267,rs2908915,-0.183  
16,60.316,rs7202988,-0.189  
16,60.341,rs1816581,-0.192  
16,60.461,rs1469906,-0.207  
16,60.693,rs12596388,-0.220  
16,60.798,rs27798,-0.211  
16,60.830,rs9928068,-0.210  
16,60.963,rs4785173,-0.216  
16,61.011,rs579980,-0.226  
16,61.214,rs12933502,-0.217  
16,61.217,rs9924026,-0.210  
16,61.225,rs746158,-0.188

16,61.419,rs1420676,-0.227  
16,61.476,rs8050856,-0.247  
16,61.499,rs999022,-0.282  
16,61.596,rs11076496,-0.279  
16,61.825,rs10521192,-0.301  
16,61.884,rs1477025,-0.312  
16,62.157,rs2242466,-0.324  
16,62.177,rs1362622,-0.324  
16,62.343,rs11076508,-0.338  
16,62.456,rs4785367,-0.319  
16,62.567,rs7204868,-0.371  
16,62.642,rs1861648,-0.363  
16,62.881,rs4444336,-0.441  
16,62.889,rs4268746,-0.470  
16,62.928,rs3892156,-0.493  
16,62.935,rs9936021,-0.497  
16,63.013,rs1548915,-0.496  
16,63.059,rs7195270,-0.531  
16,63.068,rs7197526,-0.527  
16,63.101,rs12444929,-0.541  
16,63.104,rs4785426,-0.542  
16,63.134,rs8044151,-0.545  
16,63.239,rs7204135,-0.548  
16,63.244,rs4785439,-0.548  
16,63.606,rs11859674,-0.544  
16,63.701,rs4785452,-0.542  
16,64.035,rs1354810,-0.551  
16,64.048,rs1564981,-0.551  
16,64.157,rs12599586,-0.560  
16,64.237,rs6500361,-0.519  
16,64.254,rs7206153,-0.513  
16,64.269,rs2160485,-0.508  
16,64.379,rs7200613,-0.449  
16,64.394,rs7195127,-0.451  
16,64.412,rs12102583,-0.456  
16,64.413,rs11646341,-0.456  
16,64.472,rs3909222,-0.461  
16,64.587,rs2193098,-0.499  
16,64.679,rs4605159,-0.566  
16,64.720,rs8059175,-0.629  
16,64.747,rs7189486,-0.620  
16,64.754,rs7500931,-0.635  
16,64.861,rs7202483,-0.780  
16,65.097,rs1420997,-0.676  
16,65.124,rs16949742,-0.669  
16,65.190,rs2063099,-0.651  
16,65.282,rs1109739,-0.692  
16,65.282,rs2379054,-0.692  
16,65.556,rs2648005,-0.711  
16,65.721,rs16950026,-0.664  
16,65.998,rs12931160,-0.621  
16,66.081,rs8044905,-0.608  
16,66.275,rs9941193,-0.588  
16,66.299,rs8063143,-0.621  
16,66.338,rs1564983,-0.672  
16,66.407,rs4545813,-0.707  
16,66.457,rs11076194,-0.773  
16,66.474,rs4784818,-0.778  
16,66.519,rs12928573,-0.731  
16,66.639,rs9933684,-0.753  
16,66.671,rs185266,-0.736



16,66.674,rs2059232,-0.736  
16,66.780,rs1592490,-0.727  
16,66.792,rs9936886,-0.725  
16,66.942,rs2540764,-0.705  
16,66.963,rs1641354,-0.702  
16,67.138,rs8053169,-0.652  
16,67.188,rs7196579,-0.656  
16,67.287,rs187680,-0.659  
16,67.316,rs12921005,-0.660  
16,67.317,rs12920598,-0.661  
16,67.324,rs1345389,-0.703  
16,67.354,rs1420540,-0.641  
16,67.427,rs1076479,-0.455  
16,67.444,rs187679,-0.447  
16,67.509,rs1420533,-0.310  
16,67.620,rs3112614,-0.303  
16,67.659,rs3104807,-0.300  
16,67.669,rs3104811,-0.332  
16,67.693,rs3104824,-0.291  
16,67.701,rs3112586,-0.289  
16,67.754,rs16951525,-0.276  
16,67.875,rs4784253,-0.347  
16,67.973,rs17298178,-0.316  
16,68.030,rs1579236,-0.300  
16,68.261,rs12149531,-0.273  
16,68.317,rs3931698,-0.269  
16,68.322,rs10852454,-0.299  
16,68.360,rs10153130,-0.302  
16,68.366,rs11649145,-0.303  
16,68.419,rs3852742,-0.289  
16,68.551,rs2388011,-0.235  
16,68.871,rs2041794,-0.138  
16,68.917,rs8056923,-0.151  
16,69.264,rs8050354,-0.119  
16,69.361,rs2302677,-0.120  
16,69.754,rs4386132,-0.112  
16,69.809,rs6499640,-0.113  
16,69.916,rs1861868,-0.101  
16,69.991,rs10852521,-0.072  
16,70.100,rs7199182,-0.064  
16,70.225,rs1421090,-0.055  
16,70.353,rs21111115,-0.031  
16,70.427,rs16952592,-0.025  
16,70.567,rs1558756,-0.016  
16,70.699,rs8056040,-0.025  
16,70.700,rs7188162,-0.025  
16,70.706,rs2665274,-0.026  
16,70.719,rs7199185,-0.040  
16,70.754,rs2665272,-0.052  
16,70.758,rs17236708,-0.050  
16,70.818,rs8053279,-0.045  
16,70.974,rs1013170,-0.046  
16,70.993,rs1033046,-0.049  
16,71.025,rs2010410,-0.052  
16,71.056,rs870565,-0.055  
16,71.082,rs8060235,-0.049  
16,71.106,rs2302805,-0.044  
16,71.176,rs1868689,-0.037  
16,71.184,rs8057997,-0.036  
16,71.212,rs1530787,-0.034  
16,71.219,rs12930159,-0.026

16,71.229,rs8056104,-0.031  
16,71.245,rs12149279,-0.039  
16,71.293,rs7205641,-0.035  
16,71.296,rs4784375,-0.035  
16,71.307,rs7206352,-0.034  
16,71.325,rs4784376,-0.038  
16,71.390,rs4784379,-0.047  
16,71.426,rs12447268,-0.053  
16,71.443,rs4784391,-0.056  
16,71.453,rs12925931,-0.056  
16,71.455,rs17259245,-0.054  
16,71.456,rs12931565,-0.053  
16,71.468,rs11647078,-0.041  
16,71.511,rs716083,-0.046  
16,71.536,rs8063474,-0.063  
16,71.560,rs8059628,-0.056  
16,71.618,rs9932117,-0.040  
16,71.702,rs11076060,-0.085  
16,71.798,rs4238770,-0.154  
16,71.826,rs4784442,-0.166  
16,71.872,rs11076064,-0.172  
16,71.876,rs4421976,-0.172  
16,72.013,rs1352191,-0.155  
16,72.049,rs1825730,-0.158  
16,72.061,rs9921884,-0.158  
16,72.151,rs17210989,-0.171  
16,72.165,rs1486735,-0.173  
16,72.188,rs11647470,-0.182  
16,72.218,rs11076081,-0.192  
16,72.221,rs1948073,-0.194  
16,72.312,rs2397376,-0.281  
16,72.391,rs11649293,-0.330  
16,72.466,rs16954730,-0.370  
16,72.492,rs12928690,-0.384  
16,72.584,rs258586,-0.386  
16,72.701,rs151779,-0.393  
16,72.798,rs1816595,-0.429  
16,72.801,rs12924764,-0.393  
16,72.816,rs16955194,-0.396  
16,72.879,rs243834,-0.408  
16,73.044,rs16955475,-0.367  
16,73.147,rs8051412,-0.437  
16,73.218,rs36024,-0.487  
16,73.239,rs3785152,-0.455  
16,73.251,rs1345429,-0.462  
16,73.257,rs36013,-0.465  
16,73.337,rs258097,-0.509  
16,73.559,rs1420216,-0.505  
16,73.588,rs11076123,-0.503  
16,73.596,rs12446482,-0.481  
16,73.619,rs8056747,-0.421  
16,73.624,rs7194945,-0.407  
16,73.789,rs6499813,-0.394  
16,73.955,rs7189905,-0.362  
16,73.977,rs12927815,-0.356  
16,74.009,rs16956086,-0.348  
16,74.127,rs995948,-0.323  
16,74.415,rs8043572,-0.320  
16,74.460,rs2587888,-0.334  
16,74.518,rs2241954,-0.306  
16,74.550,rs4924,-0.279

16,74.880,rs4783944,-0.272  
16,74.885,rs11076156,-0.272  
16,74.886,rs9940638,-0.272  
16,74.916,rs4784683,-0.271  
16,74.921,rs1566441,-0.304  
16,74.990,rs8052106,-0.271  
16,74.998,rs2161737,-0.279  
16,75.019,rs12934166,-0.297  
16,75.080,rs7189840,-0.278  
16,75.169,rs4784718,-0.231  
16,75.182,rs4538013,-0.225  
16,75.188,rs4783954,-0.225  
16,75.416,rs2241770,-0.249  
16,75.502,rs2289119,-0.256  
16,75.573,rs28168,-0.257  
16,75.655,rs1800775,-0.231  
16,75.697,rs1801706,-0.217  
16,75.704,rs12934552,-0.216  
16,75.709,rs289747,-0.217  
16,75.758,rs17370142,-0.208  
16,75.794,rs1684578,-0.221  
16,75.803,rs289726,-0.253  
16,75.858,rs289710,-0.239  
16,75.877,rs150366,-0.251  
16,75.886,rs11643175,-0.260  
16,75.899,rs289721,-0.232  
16,75.916,rs7204489,-0.234  
16,75.959,rs2305696,-0.238  
16,76.008,rs4784779,-0.242  
16,76.222,rs8046668,-0.257  
16,76.286,rs4566154,-0.271  
16,76.354,rs591940,-0.272  
16,76.498,rs886434,-0.223  
16,76.631,rs604965,-0.197  
16,76.696,rs12917875,-0.239  
16,76.701,rs11862192,-0.245  
16,76.756,rs12599812,-0.328  
16,76.760,rs11859308,-0.333  
16,76.770,rs1109836,-0.351  
16,76.770,rs8047279,-0.351  
16,76.775,rs3916059,-0.363  
16,76.787,rs8045257,-0.365  
16,76.790,rs7186179,-0.329  
16,76.799,rs2923131,-0.316  
16,76.807,rs2404688,-0.324  
16,76.811,rs2923144,-0.319  
16,76.815,rs2923149,-0.349  
16,76.835,rs4784858,-0.321  
16,76.855,rs10852558,-0.330  
16,76.871,rs1544953,-0.300  
16,76.874,rs838583,-0.304  
16,76.880,rs11864445,-0.272  
16,76.882,rs16959476,-0.277  
16,76.891,rs8049463,-0.296  
16,76.891,rs515155,-0.295  
16,76.897,rs7199303,-0.293  
16,76.901,rs6499924,-0.291  
16,76.903,rs8052097,-0.292  
16,76.960,rs11647309,-0.299  
16,77.272,rs2257931,-0.247  
16,77.380,rs3826096,-0.211

16,77.508,rs4784922,-0.202  
16,77.528,rs4784924,-0.198  
16,77.578,rs3924873,-0.186  
16,77.695,rs3743565,-0.163  
16,77.867,rs4784950,-0.102  
16,77.914,rs13333449,-0.098  
16,78.005,rs2432560,-0.067  
16,78.161,rs11866002,-0.045  
16,78.406,rs12447862,-0.028  
16,78.742,rs8057892,-0.013  
16,78.753,rs6499982,-0.012  
16,78.788,rs8045775,-0.010  
16,78.857,rs9939788,-0.009  
16,78.903,rs1437176,-0.009  
16,79.069,rs6499996,-0.019  
16,79.234,rs8055101,-0.008  
16,79.296,rs7205211,-0.007  
16,79.363,rs1898365,-0.008  
16,79.543,rs12051393,-0.010  
16,79.624,rs9934713,-0.010  
16,79.634,rs4511520,-0.010  
16,79.649,rs6500024,-0.010  
16,79.678,rs1820258,-0.008  
16,79.709,rs6500030,-0.008  
16,79.799,rs8062158,-0.005  
16,79.824,rs12927552,-0.005  
16,79.875,rs1351575,-0.004  
16,79.923,rs17258526,-0.013  
16,79.975,rs1476307,-0.021  
16,79.987,rs2202950,-0.023  
16,80.030,rs16961303,-0.033  
16,80.054,rs1604117,-0.039  
16,80.134,rs4785071,-0.061  
16,80.153,rs1550790,-0.062  
16,80.215,rs12449087,-0.044  
16,80.340,rs2582597,-0.036  
16,80.401,rs1364196,-0.028  
16,80.518,rs7197884,-0.010  
16,80.558,rs1947261,-0.002  
16,80.578,rs1423897,-0.003  
16,80.618,rs11076382,-0.000  
16,80.626,rs1423909,-0.000  
16,80.665,rs11861875,-0.002  
16,80.690,rs1530795,-0.002  
16,80.708,rs1436044,-0.004  
16,80.715,rs1993020,-0.005  
16,80.762,rs11646830,-0.008  
16,80.897,rs1364324,-0.015  
16,80.942,rs8055281,-0.013  
16,81.092,rs7194678,-0.007  
16,81.108,rs985184,-0.003  
16,81.113,rs2639889,-0.002  
16,81.119,rs9933717,-0.001  
16,81.161,rs9921415,0.000  
16,81.167,rs2036801,0.000  
16,81.178,rs1423742,-0.001  
16,81.187,rs1374072,-0.001  
16,81.393,rs4485351,0.000  
16,81.507,rs7204387,-0.000  
16,81.540,rs1344864,-0.000  
16,81.752,rs7196235,-0.002

16,81.815,rs4620978,-0.005  
16,81.828,rs4545840,-0.006  
16,81.907,rs8063416,-0.007  
16,81.916,rs11865810,-0.008  
16,81.934,rs10500464,-0.009  
16,81.937,rs9302545,-0.009  
16,81.942,rs9929738,-0.010  
16,81.950,rs4784182,-0.011  
16,81.959,rs2408108,-0.012  
16,81.976,rs12598067,-0.012  
16,82.019,rs12925410,-0.012  
16,82.021,rs4784190,-0.012  
16,82.079,rs1834077,-0.015  
16,82.167,rs288579,-0.023  
16,82.171,rs2938721,-0.022  
16,82.225,rs2911309,-0.033  
16,82.235,rs397599,-0.029  
16,82.244,rs1544811,-0.024  
16,82.272,rs1027277,-0.022  
16,82.436,rs2962080,-0.021  
16,82.492,rs17353186,-0.020  
16,82.518,rs2914486,-0.020  
16,82.656,rs1605956,-0.025  
16,82.707,rs198017,-0.027  
16,82.759,rs8043700,-0.035  
16,82.789,rs1865826,-0.036  
16,82.927,rs150635,-0.022  
16,82.948,rs1012248,-0.020  
16,82.980,rs16965999,-0.021  
16,83.038,rs13335082,-0.020  
16,83.077,rs9932227,-0.020  
16,83.101,rs1158538,-0.019  
16,83.216,rs11865519,-0.019  
16,83.237,rs7198575,-0.018  
16,83.262,rs12149802,-0.016  
16,83.335,rs322613,-0.017  
16,83.417,rs8056081,-0.016  
16,83.440,rs10500480,-0.013  
16,83.446,rs1461186,-0.011  
16,83.488,rs9928626,-0.007  
16,83.509,rs724051,-0.004  
16,83.637,rs1833937,-0.001  
16,83.753,rs1437145,-0.002  
16,83.870,rs9972785,-0.002  
16,83.882,rs1155216,-0.002  
16,84.037,rs4371172,-0.002  
16,84.097,rs1304340,-0.002  
16,84.241,rs4967856,-0.003  
16,84.319,rs463625,-0.004  
16,84.460,rs4967886,-0.003  
16,84.527,rs12918618,-0.002  
16,84.603,rs7189335,-0.001  
16,84.667,rs8052940,-0.001  
16,84.672,rs9939071,-0.001  
16,84.680,rs2059243,-0.001  
16,84.714,rs1593094,-0.000  
16,84.723,rs1423826,-0.000  
16,84.724,rs9927847,-0.000  
16,84.727,rs951379,-0.000  
16,84.755,rs8044752,0.002  
16,84.782,rs1110756,0.003

16,84.799,rs1110530,0.003  
16,84.812,rs1966503,0.001  
16,84.817,rs560996,0.001  
16,84.830,rs27616,0.002  
16,85.423,rs6979,0.016  
16,86.092,rs8050499,0.011  
16,86.097,rs12599487,0.011  
16,86.289,rs8059194,0.005  
16,86.346,rs2276330,0.006  
16,86.464,rs8062856,0.007  
16,86.607,rs16958736,0.007  
16,86.619,rs11649369,0.007  
16,86.632,rs3785073,0.007  
16,86.653,rs8044057,0.008  
16,86.654,rs4783704,0.008  
16,86.670,rs246134,0.009  
16,86.700,rs13330891,0.010  
16,86.701,rs12445849,0.010  
16,86.701,rs10445010,0.010  
16,86.800,rs9889219,0.004  
16,86.892,rs3790083,0.007  
16,87.250,rs2070203,0.023  
16,87.275,rs2271047,0.023  
16,87.283,rs4985367,0.015  
16,87.900,rs3826247,0.022  
16,88.012,rs6499515,0.021  
16,88.548,rs7203231,0.015  
16,88.852,rs12708923,0.013  
16,88.893,rs3213422,0.012  
16,89.258,rs8060878,0.005  
16,89.346,rs11646048,0.009  
16,90.850,rs4788477,0.006  
16,90.860,rs8051826,0.005  
16,90.879,rs9940161,0.004  
16,90.892,rs13329908,0.002  
16,90.913,rs11863839,-0.001  
16,90.924,rs11075971,-0.002  
16,90.968,rs8054577,-0.010  
16,90.986,rs7404068,-0.018  
16,91.013,rs1423730,-0.027  
16,91.023,rs6564635,-0.029  
16,91.030,rs4011585,-0.031  
16,91.038,rs6564865,-0.031  
16,91.041,rs963303,-0.031  
16,91.070,rs2113268,-0.031  
16,91.080,rs11642077,-0.029  
16,91.102,rs1364064,-0.020  
16,91.104,rs12930291,-0.021  
16,91.128,rs1364223,-0.003  
16,91.134,rs1424011,-0.002  
16,91.162,rs8046139,-0.000  
16,91.168,rs4888447,0.000  
16,91.174,rs825838,-0.000  
16,91.178,rs16972157,-0.000  
16,91.180,rs16972167,-0.001  
16,91.181,rs7191888,-0.001  
16,91.196,rs705894,0.000  
16,91.280,rs12920607,-0.001  
16,91.303,rs1038864,-0.000  
16,91.311,rs1492564,-0.001  
16,91.311,rs9933173,-0.001

16,91.313,rs388379,-0.001  
16,91.321,rs7192167,-0.000  
16,91.323,rs2019811,-0.000  
16,91.328,rs6564532,-0.000  
16,91.343,rs8063430,-0.001  
16,91.360,rs1873724,-0.005  
16,91.366,rs753808,-0.005  
16,91.388,rs2729613,-0.003  
16,91.391,rs16972698,-0.003  
16,91.406,rs1973619,-0.004  
16,91.416,rs9673361,-0.004  
16,91.502,rs2526057,-0.004  
16,91.510,rs2716555,-0.007  
16,91.513,rs12934360,-0.007  
16,91.528,rs2716606,-0.010  
16,91.546,rs6564902,-0.021  
16,91.581,rs7187327,-0.050  
16,91.591,rs2550466,-0.053  
16,91.614,rs807293,-0.043  
16,91.777,rs11641117,-0.039  
16,91.913,rs4888262,-0.028  
16,91.956,rs9932977,-0.043  
16,91.970,rs886548,-0.045  
16,91.984,rs11643479,-0.047  
16,91.990,rs7185697,-0.047  
16,92.008,rs4556811,-0.048  
16,92.060,rs8049101,-0.067  
16,92.438,rs15819,-0.041  
16,92.771,rs7206003,-0.034  
16,92.903,rs11149807,-0.038  
16,92.966,rs4243110,-0.041  
16,92.987,rs4888367,-0.042  
16,93.011,rs11641943,-0.053  
16,93.013,rs10871308,-0.053  
16,93.106,rs100912,-0.041  
16,93.106,rs247445,-0.051  
16,93.209,rs2865802,-0.050  
16,93.272,rs3096362,-0.052  
16,93.326,rs7501326,-0.076  
16,93.330,rs13333708,-0.077  
16,93.335,rs7195599,-0.078  
16,93.343,rs12447346,-0.081  
16,93.374,rs11864176,-0.079  
16,93.379,rs7199697,-0.077  
16,93.385,rs1498056,-0.074  
16,93.416,rs977045,-0.090  
16,93.421,rs364635,-0.090  
16,93.615,rs2194295,-0.074  
16,93.647,rs11866636,-0.073  
16,93.672,rs8059365,-0.072  
16,93.961,rs9923061,-0.066  
16,94.371,rs1506836,-0.082  
16,94.570,rs7186058,-0.086  
16,94.773,rs2340274,-0.088  
16,94.993,rs6564350,-0.067  
16,95.055,rs11149913,-0.060  
16,95.090,rs12599583,-0.046  
16,95.097,rs7186700,-0.046  
16,95.138,rs12926306,-0.045  
16,95.269,rs11149915,-0.042  
16,95.587,rs7192798,-0.043

16,95.629,rs17679567,-0.043  
16,95.670,rs1496961,-0.060  
16,95.702,rs1982955,-0.064  
16,95.729,rs4888580,-0.067  
16,95.765,rs678792,-0.066  
16,95.853,rs6564386,-0.064  
16,95.878,rs8056764,-0.062  
16,95.916,rs8046951,-0.059  
16,95.965,rs13338146,-0.053  
16,95.974,rs7204495,-0.052  
16,96.040,rs9319508,-0.048  
16,96.056,rs9930984,-0.048  
16,96.090,rs2562112,-0.043  
16,96.138,rs8053681,-0.032  
16,96.145,rs12443792,-0.031  
16,96.146,rs11149991,-0.031  
16,96.148,rs768503,-0.031  
16,96.162,rs749754,-0.039  
16,96.958,rs1493892,-0.057  
16,97.383,rs7204177,-0.059  
16,97.555,rs283003,-0.058  
16,98.214,rs280866,-0.060  
16,98.397,rs446663,-0.061  
16,98.542,rs2344149,-0.068  
16,98.664,rs10163466,-0.068  
16,98.788,rs12444317,-0.067  
16,98.997,rs308936,-0.084  
16,99.022,rs16946398,-0.077  
16,99.034,rs9927857,-0.074  
16,99.069,rs2914451,-0.054  
16,99.084,rs8048132,-0.051  
16,99.093,rs1609913,-0.052  
16,99.100,rs8052795,-0.061  
16,99.101,rs254772,-0.063  
16,99.103,rs173855,-0.063  
16,99.122,rs376490,-0.064  
16,99.125,rs11863454,-0.057  
16,99.128,rs9935467,-0.031  
16,99.329,rs1126047,-0.029  
16,99.332,rs372627,-0.029  
16,99.351,rs8058686,-0.031  
16,99.357,rs11645365,-0.032  
16,99.371,rs387138,-0.047  
16,99.372,rs625108,-0.047  
16,99.394,rs3886360,-0.053  
16,99.395,rs3886126,-0.055  
16,99.398,rs9924879,-0.060  
16,99.499,rs391578,-0.031  
16,99.515,rs7193514,-0.031  
16,100.053,rs1922617,-0.029  
16,100.332,rs9933156,-0.041  
16,100.421,rs7190335,-0.042  
16,100.488,rs17572291,-0.044  
16,100.499,rs17572451,-0.044  
16,100.500,rs11641394,-0.044  
16,100.510,rs12599158,-0.053  
16,100.526,rs4319778,-0.069  
16,100.689,rs2943768,-0.083  
16,100.868,rs2550626,-0.106  
16,100.894,rs2113120,-0.110  
16,100.963,rs2550655,-0.139



16,100.993,rs6564576,-0.122  
16,101.018,rs1110556,-0.127  
16,101.116,rs9925796,-0.138  
16,101.173,rs7199110,-0.135  
16,101.245,rs9932331,-0.144  
16,101.292,rs11863800,-0.147  
16,101.354,rs2037961,-0.154  
16,101.371,rs9941131,-0.152  
16,101.404,rs4888860,-0.167  
16,101.409,rs6420411,-0.193  
16,101.463,rs8054190,-0.201  
16,101.477,rs9926713,-0.188  
16,101.501,rs1394572,-0.159  
16,101.567,rs11864605,-0.102  
16,101.609,rs2221434,-0.087  
16,101.629,rs1510218,-0.087  
16,101.636,rs2134993,-0.082  
16,101.643,rs982784,-0.073  
16,101.647,rs11859772,-0.070  
16,101.652,rs4888881,-0.078  
16,101.660,rs8047671,-0.095  
16,101.677,rs13333229,-0.114  
16,101.686,rs4888884,-0.100  
16,101.721,rs10871358,-0.107  
16,101.741,rs12929249,-0.112  
16,101.760,rs4887997,-0.117  
16,101.779,rs924870,-0.131  
16,101.832,rs9941213,-0.140  
16,101.863,rs2550731,-0.142  
16,101.878,rs16949222,-0.145  
16,101.929,rs8055815,-0.124  
16,101.974,rs2550685,-0.137  
16,102.026,rs9930132,-0.166  
16,102.034,rs12446495,-0.167  
16,102.047,rs17648647,-0.179  
16,102.097,rs9939718,-0.176  
16,102.285,rs8051649,-0.139  
16,102.286,rs11150140,-0.139  
16,102.410,rs383362,-0.122  
16,102.550,rs270434,-0.139  
16,102.715,rs12444231,-0.167  
16,102.729,rs1121985,-0.167  
16,102.825,rs4888957,-0.154  
16,102.941,rs12444393,-0.131  
16,102.952,rs17798093,-0.130  
16,102.983,rs9939535,-0.125  
16,103.008,rs13333910,-0.121  
16,103.011,rs12920268,-0.123  
16,103.081,rs9926937,-0.141  
16,103.117,rs10514457,-0.151  
16,103.139,rs2067709,-0.157  
16,103.230,rs2720445,-0.133  
16,103.280,rs1364096,-0.098  
16,103.325,rs8053822,-0.092  
16,103.342,rs250157,-0.093  
16,103.403,rs1559341,-0.095  
16,103.430,rs11858998,-0.096  
16,103.489,rs8045611,-0.080  
16,103.507,rs7196953,-0.079  
16,103.519,rs7206046,-0.081  
16,103.572,rs12051063,-0.089

16,103.621,rs7184694,-0.093  
16,103.656,rs8048539,-0.087  
16,103.749,rs11866972,-0.087  
16,103.794,rs3813583,-0.088  
16,103.975,rs12919529,-0.092  
16,104.379,rs4627366,-0.067  
16,104.453,rs11150236,-0.059  
16,104.563,rs4556797,-0.060  
16,104.609,rs11648597,-0.060  
16,104.654,rs4889071,-0.062  
16,104.859,rs4889102,-0.068  
16,104.889,rs16952464,-0.067  
16,104.981,rs12102710,-0.068  
16,104.983,rs8045952,-0.068  
16,105.162,rs13339499,-0.063  
16,105.307,rs4889126,-0.063  
16,105.488,rs8055798,-0.094  
16,105.600,rs2654468,-0.112  
16,105.603,rs10514493,-0.112  
16,105.724,rs1484032,-0.104  
16,105.740,rs12446859,-0.102  
16,105.948,rs7190676,-0.089  
16,105.995,rs4889149,-0.087  
16,106.010,rs4888091,-0.086  
16,106.066,rs8058847,-0.081  
16,106.192,rs4496160,-0.089  
16,106.329,rs7187808,-0.081  
16,106.563,rs8057859,-0.095  
16,106.883,rs8046061,-0.102  
16,107.356,rs2549773,-0.102  
16,107.371,rs2549769,-0.102  
16,107.407,rs1833973,-0.104  
16,107.512,rs7191668,-0.123  
16,107.583,rs16954298,-0.120  
16,107.635,rs7188127,-0.124  
16,107.771,rs1469122,-0.127  
16,108.064,rs7198494,-0.154  
16,108.231,rs4888121,-0.132  
16,108.248,rs8045357,-0.132  
16,108.279,rs4889241,-0.128  
16,108.323,rs7204299,-0.122  
16,108.390,rs1563073,-0.099  
16,108.411,rs8043708,-0.065  
16,108.440,rs1901819,-0.056  
16,108.579,rs12596232,-0.102  
16,108.648,rs6564851,-0.093  
16,108.753,rs6564863,-0.122  
16,108.808,rs4889298,-0.125  
16,109.090,rs6564872,-0.132  
16,109.325,rs2550766,-0.142  
16,109.369,rs310007,-0.153  
16,109.427,rs12596138,-0.145  
16,109.433,rs9940384,-0.144  
16,109.451,rs2317240,-0.138  
16,109.475,rs2966122,-0.111  
16,109.605,rs8063007,-0.097  
16,109.637,rs8053235,-0.102  
16,109.862,rs11644375,-0.154  
16,109.912,rs12599865,-0.160  
16,109.988,rs6564894,-0.158  
16,110.014,rs4506892,-0.162

16,110.015,rs7185203,-0.140  
16,110.097,rs17201098,-0.143  
16,110.183,rs4889356,-0.168  
16,110.201,rs7500611,-0.176  
16,110.274,rs1128658,-0.203  
16,110.288,rs8063999,-0.208  
16,110.438,rs3808613,-0.170  
16,110.572,rs8059445,-0.112  
16,110.585,rs12446319,-0.091  
16,110.594,rs13337444,-0.093  
16,110.712,rs4328435,-0.134  
16,110.764,rs4580153,-0.177  
16,110.796,rs12598194,-0.213  
16,110.813,rs12448334,-0.217  
16,110.911,rs6420427,-0.189  
16,111.079,rs4888181,-0.155  
16,111.082,rs12596639,-0.154  
16,111.114,rs4243218,-0.151  
16,111.181,rs8063355,-0.139  
16,111.193,rs4133125,-0.136  
16,111.247,rs4889432,-0.134  
16,111.291,rs11859107,-0.155  
16,111.321,rs11865090,-0.170  
16,111.343,rs3922849,-0.181  
16,111.353,rs7203619,-0.180  
16,111.449,rs8055043,-0.172  
16,111.477,rs9928191,-0.170  
16,111.867,rs8048090,-0.162  
16,111.891,rs4243229,-0.162  
16,112.101,rs10514525,-0.159  
16,112.430,rs7205603,-0.125  
16,112.442,rs918759,-0.124  
16,112.650,rs7193238,-0.116  
16,112.717,rs12102745,-0.114  
16,112.760,rs9930179,-0.111  
16,112.797,rs4782727,-0.134  
16,112.820,rs9924628,-0.135  
16,113.128,rs4082514,-0.115  
16,113.196,rs1826240,-0.111  
16,113.451,rs1364245,-0.075  
16,113.512,rs11864743,-0.070  
16,113.557,rs9889106,-0.067  
16,113.743,rs4783112,-0.054  
16,113.811,rs8182119,-0.045  
16,113.840,rs3936367,-0.042  
16,113.846,rs8044364,-0.043  
16,113.860,rs17820141,-0.057  
16,114.029,rs4783227,-0.082  
16,114.064,rs7186479,-0.089  
16,114.109,rs3852716,-0.101  
16,114.126,rs3910214,-0.106  
16,114.234,rs16957844,-0.140  
16,114.248,rs3844412,-0.145  
16,114.357,rs12922394,-0.144  
16,114.362,rs3910232,-0.144  
16,114.363,rs17261378,-0.144  
16,114.382,rs1433157,-0.145  
16,114.415,rs3852732,-0.182  
16,114.443,rs8057927,-0.178  
16,114.557,rs8060937,-0.166  
16,114.607,rs1015972,-0.167

16,114.830,rs1350888,-0.177  
16,114.845,rs735922,-0.176  
16,114.981,rs12934135,-0.165  
16,114.989,rs1870849,-0.165  
16,115.007,rs4783276,-0.163  
16,115.013,rs12929663,-0.164  
16,115.044,rs1381499,-0.167  
16,115.164,rs2549160,-0.172  
16,115.521,rs4783300,-0.166  
16,115.587,rs7499431,-0.179  
16,115.680,rs741591,-0.228  
16,115.740,rs8046196,-0.235  
16,115.987,rs8060673,-0.256  
16,116.063,rs4528558,-0.251  
16,116.241,rs6565116,-0.235  
16,116.330,rs12716962,-0.259  
16,116.361,rs7188901,-0.265  
16,116.388,rs4782749,-0.227  
16,116.563,rs7191254,-0.174  
16,116.688,rs8046479,-0.138  
16,116.865,rs12933790,-0.071  
16,116.871,rs11150556,-0.087  
16,116.874,rs11860907,-0.103  
16,116.880,rs1895535,-0.102  
16,116.935,rs7195392,-0.093  
16,116.982,rs12444181,-0.106  
16,116.986,rs8182199,-0.107  
16,117.057,rs7201419,-0.120  
16,117.334,rs9319441,-0.086  
16,117.344,rs1424176,-0.087  
16,117.396,rs17213769,-0.087  
16,117.427,rs9319442,-0.087  
16,117.432,rs17287186,-0.086  
16,117.536,rs8054845,-0.079  
16,117.583,rs12919501,-0.081  
16,117.712,rs4476163,-0.086  
16,117.734,rs4074375,-0.085  
16,117.758,rs11149574,-0.084  
16,117.838,rs8061801,-0.104  
16,117.943,rs8055016,-0.123  
16,117.969,rs11859453,-0.127  
16,118.023,rs6563943,-0.142  
16,118.038,rs12445729,-0.149  
16,118.211,rs1364114,-0.198  
16,118.292,rs12932980,-0.204  
16,118.420,rs12927653,-0.196  
16,118.448,rs422455,-0.253  
16,118.487,rs12934964,-0.248  
16,118.524,rs10514597,-0.256  
16,118.525,rs2326023,-0.256  
16,118.650,rs462407,-0.240  
16,118.981,rs11149606,-0.231  
16,119.009,rs7186171,-0.239  
16,119.070,rs12598185,-0.253  
16,119.146,rs9923900,-0.273  
16,119.200,rs4782865,-0.228  
16,119.257,rs4782574,-0.235  
16,119.362,rs16962458,-0.193  
16,119.382,rs3881,-0.179  
16,119.391,rs1876963,-0.178  
16,119.418,rs11864146,-0.161

16,119.449,rs2875853,-0.146  
16,119.453,rs4782873,-0.142  
16,119.455,rs7184659,-0.143  
16,119.531,rs13332704,-0.191  
16,119.607,rs3817151,-0.201  
16,119.709,rs11647035,-0.200  
16,119.982,rs2288024,-0.178  
16,120.026,rs2875859,-0.174  
16,120.047,rs2303242,-0.169  
16,120.080,rs244887,-0.189  
16,120.133,rs16963074,-0.185  
16,120.178,rs1862835,-0.189  
16,120.225,rs173430,-0.196  
16,120.237,rs390112,-0.193  
16,120.284,rs244853,-0.172  
16,120.288,rs11649239,-0.172  
16,120.373,rs425422,-0.164  
16,120.419,rs4782918,-0.171  
16,120.422,rs2326207,-0.172  
16,120.456,rs244791,-0.179  
16,120.469,rs4782607,-0.182  
16,120.495,rs3826144,-0.183  
16,120.503,rs432666,-0.183  
16,120.574,rs4782612,-0.178  
16,120.640,rs7202571,-0.171  
16,120.703,rs2326253,-0.178  
16,120.725,rs11645513,-0.189  
16,120.741,rs922450,-0.194  
16,120.783,rs247820,-0.211  
16,120.788,rs12102757,-0.207  
16,120.789,rs247811,-0.207  
16,120.865,rs442134,-0.212  
16,120.881,rs4782626,-0.204  
16,120.883,rs2303853,-0.202  
16,120.903,rs247892,-0.179  
16,120.930,rs747718,-0.152  
16,121.018,rs2288574,-0.150  
16,121.142,rs12923411,-0.162  
16,121.269,rs6564059,-0.169  
16,121.286,rs1366754,-0.196  
16,121.311,rs7458,-0.171  
16,121.323,rs2099132,-0.169  
16,121.385,rs12051025,-0.160  
16,121.397,rs4783024,-0.181  
16,121.420,rs2018540,-0.170  
16,121.443,rs2052904,-0.166  
16,121.462,rs2966318,-0.171  
16,121.535,rs2550415,-0.205  
16,121.557,rs889615,-0.215  
16,121.597,rs2550412,-0.232  
16,121.661,rs4783043,-0.233  
16,121.728,rs12925758,-0.239  
16,122.145,rs4572384,-0.214  
16,122.269,rs12931881,-0.156  
16,122.473,rs2934468,-0.141  
16,122.490,rs10221162,-0.140  
16,122.871,rs3803638,-0.123  
16,122.924,rs3829514,-0.122  
16,122.930,rs870149,-0.122  
16,122.947,rs4783121,-0.122  
16,122.999,rs7196620,-0.103

16,123.048,rs3794687,-0.112  
16,123.053,rs1566465,-0.113  
16,123.097,rs8050910,-0.123  
16,123.154,rs17201064,-0.095  
16,123.156,rs16975257,-0.095  
16,123.214,rs9940866,-0.083  
16,123.239,rs1875250,-0.065  
16,123.242,rs2937134,-0.064  
16,123.318,rs4589542,-0.054  
16,123.363,rs4072655,-0.049  
16,123.444,rs4783146,-0.036  
16,123.568,rs9928615,-0.037  
16,123.719,rs8060135,-0.042  
16,123.767,rs8047113,-0.049  
16,123.801,rs11863116,-0.058  
16,123.850,rs1008712,-0.080  
16,123.865,rs8049833,-0.081  
16,123.997,rs8060803,-0.068  
16,124.004,rs2326526,-0.067  
16,124.005,rs4783169,-0.069  
16,124.013,rs4783170,-0.083  
16,124.091,rs4783172,-0.087  
16,124.166,rs8056420,-0.068  
16,124.182,rs4783187,-0.065  
16,124.234,rs8052629,-0.081  
16,124.263,rs10163269,-0.090  
16,124.327,rs1552272,-0.086  
16,124.352,rs2035489,-0.086  
16,124.587,rs7185290,-0.115  
16,124.659,rs8061209,-0.105  
16,124.674,rs8053670,-0.103  
16,124.691,rs4783226,-0.076  
16,124.756,rs4072443,-0.048  
16,124.786,rs7498829,-0.044  
16,124.863,rs7184557,-0.040  
16,124.986,rs6540278,-0.039  
16,125.131,rs4843971,-0.044  
16,125.208,rs11640338,-0.048  
16,125.580,rs7197318,-0.064  
16,126.035,rs6540225,-0.042  
16,126.038,rs16939798,-0.041  
16,126.111,rs2017161,-0.036  
16,126.136,rs433322,-0.037  
16,126.176,rs305079,-0.036  
16,126.242,rs11117425,-0.028  
16,126.244,rs8050476,-0.031  
16,126.250,rs305059,-0.042  
16,126.261,rs731707,-0.041  
16,126.264,rs305087,-0.042  
16,126.271,rs1915033,-0.042  
16,126.323,rs4843880,-0.045  
16,126.371,rs8058948,-0.034  
16,126.379,rs7196849,-0.032  
16,126.390,rs8045539,-0.021  
16,126.458,rs4843892,-0.042  
16,126.473,rs1568389,-0.044  
16,126.500,rs17818634,-0.053  
16,126.502,rs12443633,-0.041  
16,126.507,rs12600278,-0.040  
16,126.518,rs16940375,-0.037  
16,126.534,rs8049798,-0.031

16,126.536,rs7202346,-0.030  
16,126.558,rs4843344,-0.031  
16,126.570,rs4843903,-0.032  
16,126.577,rs11117445,-0.030  
16,126.582,rs6540259,-0.030  
16,126.632,rs12446545,-0.010  
16,126.650,rs12918889,-0.015  
16,126.745,rs276984,-0.005  
16,126.803,rs276981,-0.014  
16,126.819,rs276968,-0.013  
16,126.821,rs2280028,-0.013  
16,126.864,rs16940625,-0.011  
16,126.872,rs1621902,-0.011  
16,126.884,rs1693947,-0.015  
16,126.891,rs11648522,-0.011  
16,126.913,rs4843922,-0.009  
16,126.933,rs1704494,-0.010  
16,126.980,rs717482,-0.012  
16,127.058,rs2665316,-0.034  
16,127.115,rs2696838,-0.042  
16,127.128,rs2581300,-0.047  
16,127.141,rs12598669,-0.051  
16,127.192,rs4843364,-0.060  
16,127.210,rs16941019,-0.059  
16,127.215,rs902552,-0.058  
16,127.219,rs1728393,-0.058  
16,127.267,rs1728400,-0.067  
16,127.284,rs1881219,-0.065  
16,127.289,rs16941196,-0.053  
16,127.290,rs12598581,-0.051  
16,127.293,rs16941207,-0.052  
16,127.303,rs12917932,-0.053  
16,127.334,rs9938060,-0.056  
16,127.365,rs11117500,-0.043  
16,127.381,rs11642177,-0.044  
16,127.442,rs9652656,-0.050  
16,127.463,rs7204236,-0.052  
16,127.529,rs2113236,-0.056  
16,127.536,rs7204028,-0.056  
16,127.621,rs11646450,-0.049  
16,127.703,rs12448905,-0.045  
16,127.814,rs1867485,-0.033  
16,127.887,rs439485,-0.044  
16,127.921,rs7189606,-0.050  
16,127.932,rs16941895,-0.039  
16,127.933,rs299948,-0.038  
16,127.946,rs8046054,-0.046  
16,127.956,rs9941282,-0.053  
16,127.961,rs300004,-0.065  
16,127.996,rs10514618,-0.086  
16,127.998,rs16942004,-0.086  
16,128.011,rs8057453,-0.089  
16,128.038,rs2053638,-0.072  
16,128.047,rs11640511,-0.066  
16,128.049,rs11642036,-0.066  
16,128.052,rs7499944,-0.065  
16,128.099,rs8054640,-0.058  
16,128.139,rs8055182,-0.059  
16,128.153,rs16942225,-0.058  
16,128.264,rs4843467,-0.057  
16,128.292,rs4843470,-0.057

16,128.309,rs13380717,-0.054  
16,128.368,rs4072137,-0.052  
16,128.442,rs8043658,-0.071  
16,128.586,rs8063188,-0.150  
16,128.636,rs11862201,-0.168  
16,128.697,rs11646219,-0.181  
16,128.710,rs17836147,-0.201  
16,128.716,rs4843516,-0.176  
16,128.719,rs3849258,-0.177  
16,128.774,rs4843529,-0.177  
16,128.803,rs4843534,-0.182  
16,128.828,rs9928856,-0.189  
16,128.844,rs1465452,-0.201  
16,128.895,rs4843549,-0.236  
16,129.033,rs1862788,-0.241  
16,129.135,rs11649260,-0.245  
16,129.363,rs3893298,-0.327  
16,129.489,rs3909282,-0.348  
16,129.518,rs888647,-0.355  
16,129.526,rs9929765,-0.357  
16,129.536,rs3812974,-0.359  
16,129.601,rs2290018,-0.372  
16,129.606,rs3794671,-0.372  
16,129.650,rs4843693,-0.368  
16,129.666,rs17699859,-0.376  
16,129.694,rs9936204,-0.387  
16,129.731,rs7192741,-0.376  
16,129.779,rs16943315,-0.395  
16,129.785,rs11865049,-0.389  
16,129.889,rs12926841,-0.308  
16,129.911,rs11863558,-0.282  
16,129.945,rs4843745,-0.253  
16,130.091,rs4843783,-0.219  
16,130.140,rs6540170,-0.205  
16,130.182,rs7206177,-0.216  
16,130.201,rs4843811,-0.223  
16,130.277,rs12597413,-0.271  
16,130.284,rs8051233,-0.271  
16,130.459,rs4072556,-0.282  
16,130.579,rs7500313,-0.313  
16,130.609,rs8058066,-0.301  
16,130.654,rs11640794,-0.300  
16,130.685,rs904800,-0.301  
16,130.738,rs17782553,-0.300  
16,130.760,rs12447718,-0.315  
16,130.797,rs1993993,-0.296  
16,130.816,rs2334242,-0.296  
16,130.849,rs4782451,-0.287  
16,130.921,rs885157,-0.271  
16,130.922,rs17773540,-0.271  
16,130.936,rs8062466,-0.272  
16,130.959,rs12709102,-0.304  
16,130.980,rs4782395,-0.304  
16,130.989,rs4420519,-0.300  
16,130.996,rs4074632,-0.295  
16,131.022,rs8060693,-0.307  
16,131.050,rs8060966,-0.258  
16,131.092,rs750740,-0.248  
16,131.113,rs3743975,-0.241  
16,131.119,rs7203655,-0.269  
16,131.144,rs2968482,-0.270



16,131.157,rs837763,-0.269  
16,131.183,rs480727,-0.217  
16,131.196,rs550269,-0.233  
16,131.298,rs2911451,-0.255  
16,131.323,rs488251,-0.260  
16,131.355,rs538778,-0.255  
16,131.400,rs9932459,-0.232  
16,131.411,rs4129789,-0.255  
16,131.454,rs7498845,-0.244  
16,131.764,rs11076775,-0.323  
16,131.774,rs9921361,-0.323  
16,131.893,rs3102350,-0.268  
16,132.080,rs2965817,-0.212  
16,132.378,rs7188458,-0.138  
16,132.475,rs7204478,-0.123  
16,132.737,rs3212346,-0.117  
16,132.823,rs4408545,-0.117  
16,132.844,rs7201721,-0.118  
16,132.906,rs7498985,-0.120  
16,132.943,rs2078478,-0.121  
17,0.099,rs1136388,0.013  
17,0.112,rs12938802,0.013  
17,0.132,rs8078223,0.020  
17,0.145,rs4890194,0.020  
17,0.147,rs8075084,0.020  
17,0.157,rs8074031,0.020  
17,0.189,rs12452527,0.003  
17,0.192,rs7224163,0.003  
17,0.193,rs7219680,0.003  
17,0.197,rs7208188,0.002  
17,0.200,rs4617924,0.001  
17,0.222,rs7223270,-0.001  
17,0.233,rs9915773,-0.001  
17,0.261,rs4354994,-0.001  
17,0.266,rs4074549,-0.000  
17,0.279,rs4073769,-0.000  
17,0.296,rs7224337,0.000  
17,0.305,rs12450248,0.000  
17,0.346,rs8069970,0.000  
17,0.386,rs4247113,0.000  
17,0.454,rs6565724,-0.001  
17,0.749,rs3744732,-0.005  
17,0.754,rs4968145,-0.005  
17,0.768,rs741677,-0.004  
17,0.833,rs11247553,-0.004  
17,0.953,rs838369,-0.006  
17,1.068,rs2740349,-0.004  
17,1.076,rs2291778,-0.004  
17,1.188,rs623323,0.000  
17,1.229,rs516937,0.000  
17,1.320,rs561261,0.002  
17,1.432,rs16956027,0.001  
17,1.451,rs8066620,0.002  
17,1.505,rs4968122,0.000  
17,1.788,rs1692197,0.000  
17,1.817,rs8066894,0.000  
17,1.863,rs2467248,0.001  
17,1.958,rs9907824,0.002  
17,1.961,rs7209796,0.002  
17,1.989,rs11657026,0.003  
17,2.047,rs12948820,0.000

17,2.074,rs11247565,0.000  
17,2.140,rs7222776,0.000  
17,2.206,rs12939584,0.000  
17,2.280,rs7221017,0.000  
17,2.391,rs2663330,0.002  
17,2.555,rs2586238,0.003  
17,2.656,rs1057358,0.004  
17,2.749,rs7218427,0.004  
17,2.825,rs2247953,0.014  
17,2.859,rs2120233,0.016  
17,2.901,rs2257540,0.014  
17,3.063,rs7406978,0.010  
17,3.143,rs2083811,0.010  
17,3.183,rs11655015,0.011  
17,3.354,rs11867310,0.006  
17,3.500,rs8076943,0.001  
17,3.521,rs6502542,0.001  
17,3.616,rs6502862,0.001  
17,3.904,rs4790082,-0.000  
17,3.959,rs16945809,0.000  
17,4.237,rs2302456,0.006  
17,4.303,rs7218128,0.008  
17,4.338,rs1109303,0.010  
17,4.408,rs15362,0.011  
17,4.596,rs6502793,0.018  
17,4.675,rs4790666,0.022  
17,4.791,rs4790232,0.022  
17,4.917,rs17821354,0.012  
17,5.070,rs2293067,0.010  
17,5.240,rs8076353,0.012  
17,5.574,rs4790814,0.014  
17,5.845,rs8075977,0.019  
17,6.000,rs11062,0.018  
17,6.722,rs8077346,0.025  
17,6.827,rs1131636,0.031  
17,6.903,rs7208143,0.020  
17,7.222,rs9646401,0.006  
17,7.225,rs7208125,0.006  
17,7.226,rs11651343,0.005  
17,7.229,rs4790859,0.005  
17,7.235,rs11867392,0.005  
17,7.245,rs1048483,0.002  
17,7.265,rs11655099,0.002  
17,7.274,rs2126202,0.001  
17,7.315,rs3213714,-0.000  
17,7.333,rs11871981,-0.001  
17,7.335,rs4268798,-0.001  
17,7.355,rs4369716,-0.002  
17,7.356,rs4790344,-0.002  
17,7.358,rs8080511,-0.003  
17,7.383,rs12938775,-0.011  
17,7.395,rs7212318,-0.026  
17,7.396,rs7219019,-0.026  
17,7.399,rs2317225,-0.027  
17,7.450,rs11653568,-0.029  
17,7.523,rs1124040,-0.037  
17,7.571,rs1476460,-0.049  
17,7.635,rs6502555,-0.054  
17,7.664,rs9747501,-0.056  
17,7.665,rs16952454,-0.056  
17,7.682,rs8072031,-0.049

17,7.706,rs2873468,-0.039  
17,7.728,rs7223284,-0.031  
17,7.752,rs9908991,-0.027  
17,7.774,rs4287603,-0.021  
17,7.832,rs9907411,-0.039  
17,7.838,rs9907207,-0.054  
17,7.924,rs4790386,-0.077  
17,7.967,rs2317469,-0.114  
17,8.000,rs4790393,-0.122  
17,8.015,rs12950579,-0.120  
17,8.028,rs9912533,-0.118  
17,8.058,rs8080301,-0.113  
17,8.093,rs6502656,-0.121  
17,8.093,rs7220383,-0.121  
17,8.143,rs7217169,-0.104  
17,8.244,rs4790417,-0.115  
17,8.268,rs4077990,-0.120  
17,8.278,rs11867500,-0.123  
17,8.470,rs4790427,-0.154  
17,8.510,rs769433,-0.155  
17,8.528,rs11657822,-0.154  
17,8.540,rs12449465,-0.154  
17,9.364,rs226357,-0.206  
17,9.470,rs9903864,-0.215  
17,9.573,rs7209613,-0.205  
17,9.636,rs923376,-0.224  
17,9.637,rs1873061,-0.228  
17,9.639,rs6502727,-0.229  
17,9.651,rs2279567,-0.229  
17,9.682,rs11656519,-0.221  
17,9.690,rs11649929,-0.219  
17,9.745,rs7212403,-0.205  
17,9.776,rs401643,-0.188  
17,9.867,rs4790522,-0.162  
17,9.911,rs150908,-0.159  
17,10.045,rs222787,-0.179  
17,10.115,rs222778,-0.179  
17,10.300,rs170209,-0.158  
17,10.305,rs178323,-0.190  
17,10.367,rs2737139,-0.175  
17,10.379,rs9916609,-0.168  
17,10.415,rs11653095,-0.153  
17,10.446,rs4300684,-0.160  
17,10.447,rs3809805,-0.161  
17,10.450,rs2891,-0.162  
17,10.572,rs9135,-0.170  
17,10.603,rs9914305,-0.141  
17,10.623,rs887389,-0.125  
17,10.649,rs2074989,-0.169  
17,10.675,rs8076916,-0.175  
17,10.685,rs887387,-0.172  
17,10.705,rs12453022,-0.169  
17,10.885,rs2176323,-0.134  
17,10.998,rs9907500,-0.131  
17,11.249,rs8066746,-0.123  
17,11.358,rs17764251,-0.115  
17,11.378,rs4790611,-0.115  
17,11.549,rs9912168,-0.110  
17,11.561,rs4239045,-0.114  
17,11.636,rs16953945,-0.153  
17,11.640,rs12601491,-0.155

17,11.640,rs4790634,-0.155  
17,11.675,rs333117,-0.186  
17,11.697,rs9896111,-0.224  
17,11.708,rs7213707,-0.223  
17,11.716,rs4790638,-0.217  
17,11.742,rs1351231,-0.224  
17,11.794,rs7216284,-0.241  
17,11.849,rs4597375,-0.279  
17,11.869,rs8076149,-0.284  
17,11.945,rs748694,-0.289  
17,12.079,rs4790694,-0.246  
17,12.100,rs1050998,-0.250  
17,12.112,rs3826517,-0.258  
17,12.138,rs9890937,-0.294  
17,12.162,rs4790229,-0.305  
17,12.189,rs4790706,-0.309  
17,12.247,rs1052751,-0.352  
17,12.543,rs426475,-0.358  
17,12.653,rs8072032,-0.375  
17,13.300,rs9893995,-0.440  
17,13.338,rs2074437,-0.441  
17,13.405,rs1805453,-0.443  
17,13.474,rs11651270,-0.445  
17,13.630,rs2733366,-0.451  
17,13.688,rs925599,-0.451  
17,13.728,rs2716932,-0.457  
17,13.888,rs2058364,-0.479  
17,14.578,rs4985692,-0.554  
17,14.685,rs7217165,-0.547  
17,14.866,rs11655838,-0.562  
17,14.915,rs7218600,-0.638  
17,14.930,rs1362765,-0.637  
17,15.012,rs8080504,-0.640  
17,15.013,rs11078592,-0.640  
17,15.182,rs17178900,-0.636  
17,15.302,rs7218232,-0.604  
17,15.533,rs8076557,-0.621  
17,15.687,rs12936643,-0.567  
17,15.982,rs1183141,-0.566  
17,15.997,rs967787,-0.567  
17,16.222,rs1970983,-0.622  
17,16.235,rs9907608,-0.633  
17,16.271,rs7207644,-0.706  
17,16.288,rs16955393,-0.705  
17,16.307,rs8064677,-0.745  
17,16.319,rs9902061,-0.744  
17,16.405,rs8076894,-0.787  
17,16.419,rs7213280,-0.800  
17,16.465,rs2302837,-0.867  
17,16.490,rs2302838,-0.897  
17,16.525,rs4468679,-0.940  
17,16.570,rs7207798,-0.920  
17,16.662,rs7223723,-0.960  
17,16.889,rs4796449,-0.940  
17,16.910,rs6502938,-0.940  
17,16.918,rs7219963,-0.940  
17,16.993,rs9902576,-0.922  
17,17.146,rs9894371,-0.897  
17,17.234,rs4796467,-0.895  
17,17.947,rs9900150,-0.774  
17,18.086,rs218655,-0.746

17,18.185,rs218687,-0.773  
17,18.291,rs218671,-0.759  
17,18.303,rs8072966,-0.765  
17,18.349,rs16956192,-0.735  
17,18.415,rs218685,-0.725  
17,18.654,rs955461,-0.696  
17,18.809,rs906749,-0.679  
17,18.885,rs1509121,-0.674  
17,19.153,rs8078571,-0.614  
17,19.458,rs311759,-0.553  
17,19.504,rs7211486,-0.544  
17,19.575,rs2135845,-0.530  
17,19.720,rs1126667,-0.485  
17,19.826,rs4796576,-0.469  
17,19.908,rs17805145,-0.471  
17,19.986,rs11653054,-0.454  
17,20.008,rs314239,-0.440  
17,20.027,rs12951306,-0.429  
17,20.080,rs314245,-0.393  
17,20.084,rs1237044,-0.426  
17,20.205,rs11650232,-0.429  
17,20.477,rs3744405,-0.433  
17,20.503,rs11652407,-0.455  
17,20.510,rs2270981,-0.458  
17,20.540,rs4796407,-0.493  
17,20.553,rs17732672,-0.502  
17,20.581,rs7219773,-0.499  
17,20.610,rs8075459,-0.473  
17,20.648,rs3853818,-0.441  
17,20.702,rs4265880,-0.458  
17,20.720,rs2269459,-0.465  
17,20.784,rs10438740,-0.429  
17,20.855,rs2955617,-0.441  
17,20.879,rs1641510,-0.440  
17,20.899,rs8079544,-0.452  
17,20.936,rs7141,-0.486  
17,20.963,rs839721,-0.496  
17,20.973,rs8077824,-0.499  
17,21.015,rs17806045,-0.479  
17,21.062,rs872346,-0.455  
17,21.062,rs9916791,-0.455  
17,21.063,rs7213894,-0.456  
17,21.216,rs11650083,-0.488  
17,21.317,rs4130509,-0.552  
17,21.354,rs8073913,-0.589  
17,21.371,rs12603935,-0.616  
17,21.391,rs4792199,-0.655  
17,21.410,rs2289587,-0.599  
17,21.413,rs7215658,-0.594  
17,21.532,rs7503353,-0.671  
17,21.687,rs1861952,-0.786  
17,21.695,rs8069620,-0.788  
17,21.741,rs1695213,-0.801  
17,21.790,rs12150003,-0.776  
17,21.843,rs3817003,-0.839  
17,22.208,rs1579523,-0.867  
17,22.213,rs8068795,-0.866  
17,22.220,rs9897780,-0.865  
17,22.439,rs7222961,-0.896  
17,22.549,rs4632172,-0.913  
17,22.786,rs8071193,-0.915

17,23.024,rs4497735,-0.906  
17,23.091,rs9912143,-0.961  
17,23.112,rs195770,-0.965  
17,23.431,rs383123,-0.957  
17,23.482,rs411268,-0.960  
17,23.488,rs427554,-0.959  
17,23.542,rs9895992,-0.955  
17,23.611,rs10491087,-0.917  
17,23.685,rs613229,-0.895  
17,23.695,rs9892906,-0.892  
17,23.736,rs12951810,-0.899  
17,23.749,rs7219148,-0.900  
17,23.825,rs940854,-0.922  
17,23.936,rs17808998,-0.864  
17,23.960,rs9913468,-0.861  
17,24.058,rs4641781,-0.847  
17,24.080,rs7211163,-0.849  
17,24.206,rs2072321,-0.842  
17,24.400,rs7225607,-0.789  
17,24.416,rs7221329,-0.790  
17,24.484,rs16958048,-0.806  
17,24.537,rs12940357,-0.813  
17,24.554,rs9897341,-0.820  
17,24.559,rs1009675,-0.823  
17,24.647,rs3744656,-0.860  
17,24.683,rs2302198,-0.867  
17,24.743,rs7206985,-0.932  
17,24.812,rs7215786,-0.935  
17,24.863,rs9915637,-0.961  
17,24.930,rs1558214,-1.041  
17,24.967,rs2551799,-1.045  
17,24.998,rs12938765,-1.048  
17,25.109,rs11658644,-1.057  
17,25.205,rs8071380,-1.062  
17,25.310,rs8070753,-1.058  
17,25.532,rs8073431,-1.101  
17,25.567,rs7215204,-1.106  
17,25.574,rs9902096,-1.226  
17,25.707,rs9904459,-1.192  
17,25.827,rs4791838,-1.154  
17,25.951,rs4791841,-1.152  
17,25.984,rs3891720,-1.149  
17,26.013,rs2168856,-1.126  
17,26.157,rs16958408,-1.122  
17,26.479,rs4275899,-1.122  
17,26.658,rs6503235,-1.009  
17,27.096,rs3913649,-0.986  
17,27.188,rs2654725,-0.985  
17,27.321,rs185677,-1.038  
17,27.422,rs8067933,-1.046  
17,27.512,rs11655932,-1.059  
17,27.684,rs9303245,-1.077  
17,27.766,rs4791876,-0.984  
17,27.872,rs3786122,-0.908  
17,27.917,rs7218549,-0.878  
17,28.192,rs2286531,-0.914  
17,28.214,rs8069231,-0.913  
17,28.338,rs8072109,-0.863  
17,28.492,rs11653099,-0.906  
17,28.510,rs3826529,-0.912  
17,28.530,rs740664,-0.917

17,28.794,rs8079743,-0.678  
17,29.115,rs8080606,-0.777  
17,29.137,rs12601160,-0.741  
17,29.151,rs16959323,-0.724  
17,29.171,rs1476440,-0.729  
17,29.222,rs739353,-0.740  
17,29.227,rs11652587,-0.737  
17,29.244,rs3764429,-0.715  
17,29.341,rs7219805,-0.689  
17,29.350,rs7211216,-0.693  
17,29.362,rs6503290,-0.697  
17,29.369,rs11870887,-0.699  
17,29.370,rs2051667,-0.699  
17,29.503,rs8066598,-0.771  
17,29.520,rs4128644,-0.781  
17,29.563,rs4791935,-0.814  
17,29.627,rs8067942,-0.858  
17,29.736,rs4791950,-0.934  
17,29.787,rs8077735,-0.944  
17,29.839,rs9913807,-0.986  
17,29.877,rs4239112,-1.011  
17,29.941,rs4791962,-1.114  
17,29.944,rs12602333,-1.112  
17,29.993,rs4451986,-1.064  
17,29.994,rs4791965,-1.063  
17,30.087,rs999338,-1.014  
17,30.156,rs4451985,-0.972  
17,30.189,rs8067532,-0.962  
17,30.259,rs2072265,-0.915  
17,30.291,rs7213488,-0.890  
17,30.584,rs2007027,-0.887  
17,30.633,rs3744566,-0.888  
17,30.752,rs2041127,-0.921  
17,30.810,rs8079868,-0.927  
17,30.901,rs201611,-0.949  
17,30.945,rs2662959,-0.822  
17,30.993,rs2520150,-0.803  
17,31.140,rs7217562,-0.741  
17,31.144,rs2165875,-0.740  
17,31.202,rs992750,-0.723  
17,31.216,rs10852926,-0.718  
17,31.245,rs8078933,-0.720  
17,31.261,rs7207511,-0.721  
17,31.278,rs6503334,-0.658  
17,31.375,rs860420,-0.612  
17,31.510,rs1118198,-0.591  
17,31.529,rs2024072,-0.671  
17,31.532,rs11655962,-0.683  
17,31.537,rs2874502,-0.695  
17,31.565,rs758112,-0.772  
17,31.593,rs7207977,-0.820  
17,31.620,rs4791439,-0.802  
17,31.794,rs9907306,-0.736  
17,31.818,rs1610053,-0.725  
17,31.852,rs9896385,-0.707  
17,32.020,rs4389174,-0.631  
17,32.055,rs9906456,-0.620  
17,32.061,rs16944322,-0.618  
17,32.174,rs1877644,-0.653  
17,32.212,rs2908948,-0.647  
17,32.224,rs11655824,-0.650

17,32.235,rs11658629,-0.653  
17,32.416,rs973358,-0.766  
17,32.420,rs16944856,-0.767  
17,32.425,rs1978344,-0.769  
17,32.877,rs11078021,-0.800  
17,32.918,rs3809729,-0.737  
17,32.956,rs4792152,-0.697  
17,32.969,rs929466,-0.638  
17,33.010,rs12936449,-0.651  
17,33.045,rs11649836,-0.665  
17,33.115,rs9896319,-0.624  
17,33.659,rs3744583,-0.462  
17,33.679,rs11078030,-0.468  
17,33.728,rs4539641,-0.485  
17,33.774,rs7225157,-0.476  
17,33.856,rs7225975,-0.484  
17,33.962,rs9892871,-0.534  
17,34.111,rs8070243,-0.549  
17,34.214,rs4792189,-0.599  
17,34.312,rs12453561,-0.646  
17,34.562,rs9788973,-0.669  
17,34.647,rs7207011,-0.650  
17,34.758,rs11078062,-0.613  
17,34.835,rs16945805,-0.589  
17,34.866,rs2529718,-0.581  
17,34.873,rs2529727,-0.572  
17,34.913,rs7225431,-0.509  
17,34.958,rs7209652,-0.491  
17,35.032,rs400575,-0.465  
17,35.048,rs4792258,-0.440  
17,35.063,rs237325,-0.413  
17,35.063,rs10521196,-0.412  
17,35.112,rs180750,-0.321  
17,35.126,rs1350703,-0.270  
17,35.169,rs237293,-0.269  
17,35.185,rs4791499,-0.271  
17,35.295,rs12150051,-0.244  
17,35.403,rs7219494,-0.204  
17,35.447,rs8072823,-0.191  
17,35.545,rs2052003,-0.187  
17,35.602,rs9303058,-0.189  
17,35.702,rs11657113,-0.210  
17,35.743,rs12452239,-0.215  
17,35.951,rs3785731,-0.226  
17,36.030,rs8082179,-0.209  
17,36.150,rs12165053,-0.223  
17,36.199,rs9906503,-0.226  
17,36.228,rs882653,-0.225  
17,36.272,rs8076914,-0.219  
17,36.343,rs3785716,-0.212  
17,36.366,rs2240570,-0.214  
17,36.455,rs4792311,-0.211  
17,36.529,rs11658800,-0.214  
17,36.618,rs9893477,-0.186  
17,36.624,rs1003902,-0.187  
17,36.701,rs7220714,-0.201  
17,36.704,rs7207136,-0.200  
17,36.753,rs7207964,-0.181  
17,36.756,rs974683,-0.180  
17,36.779,rs11652225,-0.176  
17,36.885,rs2674948,-0.178



17,36.930,rs2188892,-0.173  
17,37.000,rs2674962,-0.174  
17,37.090,rs8064833,-0.230  
17,37.117,rs8072892,-0.239  
17,37.125,rs17564279,-0.241  
17,37.127,rs7211590,-0.241  
17,37.300,rs4792347,-0.230  
17,37.400,rs4792349,-0.228  
17,37.697,rs2158077,-0.177  
17,37.890,rs1029674,-0.183  
17,37.999,rs3859253,-0.173  
17,38.070,rs2996009,-0.168  
17,38.162,rs7214164,-0.210  
17,38.313,rs7209938,-0.240  
17,38.368,rs12943793,-0.241  
17,38.597,rs3785702,-0.230  
17,38.689,rs4588021,-0.234  
17,38.746,rs12952904,-0.234  
17,38.994,rs727547,-0.239  
17,39.377,rs11078180,-0.233  
17,39.388,rs4054823,-0.271  
17,39.478,rs9892571,-0.420  
17,39.511,rs748928,-0.453  
17,39.522,rs765101,-0.461  
17,39.606,rs6502298,-0.515  
17,39.634,rs9910389,-0.580  
17,39.638,rs1867231,-0.583  
17,39.694,rs2322969,-0.607  
17,39.757,rs4280292,-0.669  
17,39.783,rs8080993,-0.688  
17,39.927,rs7226344,-0.814  
17,40.087,rs746590,-0.868  
17,40.236,rs2078340,-0.949  
17,40.240,rs11657682,-0.943  
17,40.276,rs12943477,-0.978  
17,40.294,rs9913851,-0.953  
17,40.353,rs8075653,-0.869  
17,40.377,rs11651964,-0.854  
17,40.447,rs1005628,-0.821  
17,40.461,rs6502321,-0.776  
17,40.483,rs8077302,-0.705  
17,40.519,rs2159132,-0.669  
17,40.545,rs9909412,-0.671  
17,40.659,rs2856177,-0.621  
17,40.697,rs8066913,-0.647  
17,41.086,rs7217154,-0.591  
17,41.319,rs4791569,-0.584  
17,41.510,rs2190625,-0.600  
17,41.542,rs4791571,-0.602  
17,41.544,rs886862,-0.601  
17,41.576,rs1005321,-0.583  
17,41.672,rs9890916,-0.534  
17,41.773,rs2127998,-0.546  
17,41.830,rs2127996,-0.475  
17,41.858,rs4792477,-0.438  
17,41.910,rs1994029,-0.401  
17,41.940,rs17692591,-0.391  
17,41.951,rs3912263,-0.392  
17,41.981,rs2127994,-0.394  
17,42.053,rs6502354,-0.394  
17,42.211,rs2022240,-0.408

17,42.282,rs16949616,-0.412  
17,42.519,rs622272,-0.421  
17,42.614,rs12936254,-0.402  
17,42.706,rs7219146,-0.384  
17,42.898,rs2323453,-0.366  
17,43.004,rs12451822,-0.334  
17,43.014,rs12944663,-0.320  
17,43.044,rs2075442,-0.253  
17,43.063,rs9303115,-0.216  
17,43.082,rs11649886,-0.202  
17,43.118,rs1866430,-0.194  
17,43.150,rs893581,-0.165  
17,43.156,rs11871749,-0.163  
17,43.215,rs10521281,-0.144  
17,43.233,rs8068028,-0.134  
17,43.299,rs8067255,-0.114  
17,43.415,rs2215300,-0.122  
17,43.481,rs8064512,-0.137  
17,43.524,rs6502401,-0.127  
17,43.535,rs1016144,-0.125  
17,43.583,rs11078274,-0.113  
17,43.663,rs9900486,-0.092  
17,43.715,rs4792567,-0.084  
17,43.745,rs8078179,-0.079  
17,43.757,rs917541,-0.077  
17,43.797,rs9899309,-0.056  
17,43.828,rs16950911,-0.057  
17,43.830,rs12949826,-0.057  
17,43.901,rs8077409,-0.051  
17,43.927,rs16830,-0.050  
17,43.961,rs8078279,-0.048  
17,43.993,rs2191116,-0.055  
17,44.102,rs9906227,-0.057  
17,44.253,rs230950,-0.058  
17,44.510,rs2323657,-0.065  
17,44.578,rs8066838,-0.063  
17,44.595,rs12449918,-0.067  
17,44.605,rs2323661,-0.066  
17,44.617,rs764701,-0.076  
17,44.679,rs11653435,-0.107  
17,44.769,rs4791622,-0.115  
17,44.791,rs7219850,-0.099  
17,44.933,rs2938158,-0.104  
17,45.073,rs4792630,-0.116  
17,45.173,rs2074890,-0.116  
17,45.258,rs17776733,-0.106  
17,45.381,rs2240593,-0.122  
17,45.642,rs578065,-0.133  
17,45.985,rs8074888,-0.146  
17,46.253,rs178791,-0.155  
17,46.295,rs17779879,-0.146  
17,46.415,rs1558241,-0.115  
17,46.443,rs608624,-0.118  
17,46.451,rs571877,-0.118  
17,46.457,rs2970065,-0.118  
17,46.466,rs11649741,-0.118  
17,46.578,rs8065506,-0.095  
17,46.944,rs4985694,-0.094  
17,46.963,rs8074984,-0.094  
17,46.977,rs9907308,-0.092  
17,47.115,rs10852845,-0.061

17,47.232,rs3744124,-0.042  
17,47.297,rs1029830,-0.035  
17,47.343,rs7226068,-0.034  
17,47.360,rs10852849,-0.033  
17,47.369,rs242253,-0.034  
17,47.372,rs1242473,-0.034  
17,47.377,rs7223820,-0.034  
17,47.424,rs7225831,-0.037  
17,47.465,rs1242492,-0.035  
17,47.629,rs7224619,-0.042  
17,47.662,rs11654526,-0.042  
17,47.710,rs1006656,-0.044  
17,47.914,rs17731766,-0.053  
17,47.945,rs2975004,-0.055  
17,48.028,rs1378602,-0.057  
17,48.130,rs9902498,-0.066  
17,48.362,rs4441330,-0.106  
17,48.395,rs8071574,-0.113  
17,48.447,rs4244595,-0.115  
17,48.504,rs4924935,-0.106  
17,48.560,rs11657284,-0.111  
17,48.579,rs2076562,-0.111  
17,48.580,rs1634413,-0.113  
17,48.581,rs9903337,-0.114  
17,48.597,rs2472717,-0.135  
17,48.605,rs8070758,-0.136  
17,48.947,rs11658544,-0.132  
17,48.982,rs2440154,-0.130  
17,49.030,rs8074500,-0.116  
17,49.075,rs1042183,-0.134  
17,49.103,rs157386,-0.137  
17,49.110,rs157407,-0.136  
17,49.212,rs7218708,-0.148  
17,49.386,rs9909852,-0.138  
17,49.492,rs17762379,-0.159  
17,49.498,rs1382779,-0.161  
17,49.880,rs1815569,-0.185  
17,49.966,rs7222400,-0.168  
17,50.010,rs9911289,-0.168  
17,50.055,rs899343,-0.162  
17,50.071,rs17771193,-0.155  
17,50.080,rs8064815,-0.152  
17,50.112,rs8070360,-0.139  
17,50.113,rs899333,-0.139  
17,50.158,rs732928,-0.143  
17,50.234,rs1320252,-0.157  
17,50.259,rs4985855,-0.244  
17,50.306,rs9889782,-0.239  
17,50.336,rs12453531,-0.229  
17,50.343,rs7406009,-0.226  
17,50.563,rs2169915,-0.217  
17,50.715,rs4889705,-0.229  
17,52.849,rs7223436,-0.282  
17,52.867,rs7207347,-0.283  
17,52.920,rs4239230,-0.263  
17,52.998,rs940015,-0.273  
17,53.009,rs2948527,-0.275  
17,53.011,rs2945387,-0.275  
17,53.026,rs2948519,-0.279  
17,53.050,rs12945695,-0.266  
17,53.101,rs4795430,-0.240

17,53.113,rs2027993,-0.238  
17,53.287,rs3764866,-0.240  
17,53.340,rs2191090,-0.240  
17,54.024,rs968726,-0.199  
17,54.060,rs8081659,-0.199  
17,54.331,rs4794848,-0.182  
17,54.467,rs7212295,-0.172  
17,54.877,rs8077048,-0.195  
17,54.893,rs11868474,-0.196  
17,55.324,rs542939,-0.192  
17,55.364,rs3744626,-0.189  
17,55.647,rs12941382,-0.182  
17,56.087,rs6354,-0.182  
17,56.215,rs2129785,-0.167  
17,56.438,rs3110093,-0.143  
17,57.167,rs216457,-0.117  
17,58.640,rs3760318,-0.115  
17,58.801,rs9915181,-0.114  
17,60.734,rs4258685,-0.097  
17,60.779,rs7406402,-0.097  
17,60.889,rs178858,-0.095  
17,61.109,rs9909944,-0.111  
17,61.241,rs1548471,-0.104  
17,61.424,rs223128,-0.081  
17,61.452,rs8075034,-0.080  
17,61.511,rs223138,-0.074  
17,62.231,rs894725,-0.091  
17,62.477,rs12162135,-0.066  
17,62.586,rs10775410,-0.057  
17,62.592,rs17733497,-0.055  
17,62.644,rs225206,-0.042  
17,62.657,rs4795708,-0.039  
17,62.726,rs11868228,-0.025  
17,62.768,rs321183,-0.022  
17,63.334,rs4795729,-0.011  
17,63.344,rs2188952,-0.014  
17,63.351,rs28958,-0.017  
17,63.370,rs12938484,-0.014  
17,63.415,rs16589,-0.009  
17,63.515,rs11657055,-0.005  
17,63.557,rs9895456,-0.002  
17,63.568,rs9889583,-0.002  
17,63.571,rs7212997,-0.002  
17,63.573,rs319774,-0.002  
17,63.589,rs16968117,-0.002  
17,63.627,rs2275,-0.001  
17,63.666,rs319763,-0.000  
17,63.675,rs319749,-0.000  
17,63.704,rs7209079,-0.000  
17,63.728,rs1497366,0.000  
17,63.815,rs4795769,0.001  
17,63.891,rs1354492,0.001  
17,63.909,rs2036535,0.001  
17,63.919,rs1553494,0.002  
17,63.941,rs1123025,0.001  
17,63.988,rs7214958,0.001  
17,64.007,rs12942506,0.001  
17,64.088,rs964459,0.005  
17,64.169,rs1560916,0.006  
17,64.171,rs9908335,0.006  
17,64.192,rs11658327,0.007

17,64.213,rs280048,0.007  
17,64.223,rs280043,0.008  
17,64.236,rs7220362,0.007  
17,64.253,rs10512451,0.007  
17,64.293,rs7209819,0.009  
17,64.314,rs9908295,0.009  
17,64.333,rs2951665,0.009  
17,64.389,rs10512454,0.006  
17,64.477,rs6505380,0.005  
17,64.541,rs2881782,0.006  
17,64.609,rs317342,0.003  
17,64.684,rs317373,0.004  
17,64.694,rs11867369,0.004  
17,64.761,rs11869615,0.004  
17,64.867,rs11650066,0.005  
17,64.868,rs915478,0.005  
17,64.888,rs8070999,0.004  
17,64.915,rs317331,0.002  
17,64.936,rs317366,0.001  
17,64.983,rs8081899,-0.001  
17,65.007,rs9892726,-0.004  
17,65.034,rs4451997,-0.004  
17,65.067,rs3744516,-0.002  
17,65.322,rs11080254,-0.001  
17,65.332,rs2097761,-0.002  
17,65.355,rs7217519,-0.009  
17,65.403,rs8075337,-0.012  
17,65.507,rs1860180,-0.021  
17,65.513,rs8075846,-0.022  
17,65.598,rs17574949,-0.067  
17,65.657,rs756882,-0.105  
17,65.665,rs9895330,-0.114  
17,65.670,rs159251,-0.119  
17,65.749,rs213135,-0.121  
17,65.758,rs4306569,-0.113  
17,65.768,rs4255823,-0.102  
17,65.780,rs6505413,-0.081  
17,65.821,rs7209036,-0.098  
17,65.830,rs7214380,-0.101  
17,65.850,rs4795007,-0.113  
17,65.870,rs11654085,-0.138  
17,65.909,rs9900451,-0.111  
17,65.935,rs9916211,-0.120  
17,65.936,rs1860276,-0.120  
17,65.937,rs4636954,-0.121  
17,65.943,rs11650365,-0.121  
17,65.945,rs8182290,-0.120  
17,65.948,rs8071265,-0.119  
17,66.008,rs1990264,-0.107  
17,66.069,rs12453075,-0.116  
17,66.278,rs4795048,-0.144  
17,66.314,rs1482103,-0.149  
17,66.369,rs3744358,-0.151  
17,66.479,rs936656,-0.123  
17,66.512,rs3736143,-0.124  
17,66.598,rs1383541,-0.088  
17,66.630,rs3744364,-0.114  
17,66.647,rs9908966,-0.098  
17,66.665,rs11080335,-0.103  
17,66.681,rs16970816,-0.104  
17,66.769,rs11869519,-0.124

17,66.862,rs8078470,-0.161  
17,66.866,rs7214197,-0.163  
17,66.906,rs8065626,-0.179  
17,66.908,rs4796089,-0.180  
17,66.911,rs17549947,-0.181  
17,66.995,rs321601,-0.178  
17,67.133,rs2063979,-0.187  
17,67.208,rs7217473,-0.170  
17,67.208,rs854685,-0.170  
17,67.372,rs854658,-0.159  
17,67.412,rs854672,-0.143  
17,67.535,rs854462,-0.142  
17,67.617,rs11080372,-0.144  
17,68.073,rs2306589,-0.150  
17,68.097,rs2306595,-0.151  
17,68.216,rs10491120,-0.156  
17,68.221,rs757010,-0.156  
17,68.223,rs211994,-0.156  
17,68.231,rs211981,-0.178  
17,68.247,rs9889382,-0.207  
17,68.250,rs12949442,-0.213  
17,68.259,rs9890738,-0.224  
17,68.265,rs17561428,-0.232  
17,68.285,rs1899650,-0.244  
17,68.311,rs756060,-0.265  
17,68.360,rs295886,-0.326  
17,68.427,rs7207884,-0.368  
17,68.431,rs8074928,-0.376  
17,68.453,rs2270662,-0.358  
17,68.478,rs11652230,-0.312  
17,68.486,rs2088367,-0.324  
17,68.487,rs17651045,-0.327  
17,68.508,rs1109593,-0.290  
17,68.525,rs12936981,-0.292  
17,68.636,rs1634332,-0.269  
17,68.648,rs11870749,-0.267  
17,68.745,rs9906543,-0.203  
17,68.924,rs4795194,-0.166  
17,69.015,rs853231,-0.149  
17,69.083,rs763512,-0.133  
17,69.103,rs1048701,-0.125  
17,69.194,rs12936144,-0.115  
17,69.205,rs4074770,-0.110  
17,69.214,rs4794756,-0.119  
17,69.225,rs3094515,-0.135  
17,69.226,rs2285741,-0.135  
17,69.231,rs1859211,-0.137  
17,69.245,rs2158254,-0.142  
17,69.251,rs3110644,-0.139  
17,69.253,rs11649743,-0.139  
17,69.258,rs7407025,-0.135  
17,69.274,rs4430796,-0.147  
17,69.284,rs17626423,-0.143  
17,69.303,rs4795224,-0.126  
17,69.350,rs2138733,-0.115  
17,69.364,rs7215724,-0.120  
17,69.710,rs8066158,-0.217  
17,69.714,rs8067381,-0.217  
17,69.717,rs6503608,-0.218  
17,69.746,rs7502216,-0.226  
17,69.859,rs8080886,-0.286

17,69.874,rs3892952,-0.296  
17,69.880,rs4795294,-0.300  
17,69.926,rs4794786,-0.326  
17,69.939,rs2075053,-0.333  
17,70.000,rs708692,-0.343  
17,70.035,rs2338115,-0.345  
17,70.052,rs228307,-0.347  
17,70.151,rs979607,-0.359  
17,70.170,rs226212,-0.360  
17,70.171,rs17590228,-0.360  
17,70.178,rs3785461,-0.358  
17,70.213,rs82977,-0.295  
17,70.230,rs660413,-0.265  
17,70.240,rs573556,-0.262  
17,70.346,rs8070153,-0.261  
17,70.453,rs11658255,-0.246  
17,70.474,rs557570,-0.242  
17,70.478,rs16495,-0.240  
17,70.508,rs657723,-0.243  
17,70.544,rs521633,-0.275  
17,70.554,rs486512,-0.274  
17,71.129,rs1877032,-0.252  
17,71.291,rs8067378,-0.251  
17,71.345,rs4065321,-0.228  
17,71.362,rs2071369,-0.231  
17,71.409,rs2071427,-0.238  
17,71.410,rs12941497,-0.238  
17,71.415,rs16965644,-0.239  
17,71.549,rs2715553,-0.255  
17,71.616,rs538399,-0.236  
17,71.630,rs749906,-0.230  
17,71.633,rs4890115,-0.230  
17,71.679,rs3136685,-0.231  
17,71.765,rs2429552,-0.247  
17,71.804,rs981684,-0.255  
17,71.817,rs7219451,-0.252  
17,71.865,rs7212483,-0.250  
17,71.869,rs2315504,-0.250  
17,71.913,rs9257,-0.247  
17,72.255,rs7220116,-0.270  
17,72.569,rs2604953,-0.274  
17,72.573,rs12948056,-0.274  
17,72.588,rs2071600,-0.281  
17,72.599,rs2301354,-0.287  
17,72.618,rs736932,-0.308  
17,72.624,rs768027,-0.312  
17,72.688,rs1008753,-0.360  
17,72.693,rs1076188,-0.402  
17,72.694,rs2079009,-0.406  
17,72.918,rs6503695,-0.503  
17,73.378,rs11649877,-0.439  
17,73.508,rs2593595,-0.439  
17,73.508,rs2229611,-0.439  
17,73.532,rs2880540,-0.333  
17,73.533,rs12941802,-0.346  
17,73.534,rs739770,-0.348  
17,73.534,rs1398882,-0.349  
17,73.535,rs9911324,-0.322  
17,73.535,rs1107748,-0.286  
17,73.536,rs7216471,-0.259  
17,73.538,rs1234612,-0.247

17,73.548,rs423757,-0.242  
17,73.679,rs2072081,-0.206  
17,73.707,rs2074107,-0.199  
17,73.754,rs2011951,-0.184  
17,73.804,rs11867692,-0.200  
17,73.863,rs6503398,-0.208  
17,73.919,rs8067833,-0.204  
17,73.931,rs736866,-0.204  
17,73.990,rs2269746,-0.185  
17,74.003,rs713101,-0.181  
17,74.016,rs12944434,-0.177  
17,74.019,rs7224944,-0.177  
17,74.043,rs4986172,-0.176  
17,74.300,rs2074289,-0.156  
17,74.320,rs7216796,-0.155  
17,74.338,rs2435200,-0.162  
17,74.378,rs9904280,-0.151  
17,74.386,rs7225002,-0.147  
17,75.091,rs199494,-0.118  
17,75.107,rs10514911,-0.118  
17,75.151,rs11079738,-0.118  
17,75.173,rs2083797,-0.118  
17,75.194,rs12952746,-0.118  
17,75.210,rs4968282,-0.117  
17,75.230,rs197943,-0.121  
17,75.317,rs2316758,-0.139  
17,75.446,rs1713494,-0.176  
17,75.503,rs12947008,-0.181  
17,75.509,rs11570460,-0.181  
17,75.613,rs9895150,-0.200  
17,75.618,rs11079764,-0.200  
17,76.197,rs10514929,-0.171  
17,76.872,rs11870935,-0.138  
17,77.164,rs12950390,-0.117  
17,77.433,rs2325752,-0.100  
17,78.034,rs2278868,-0.087  
17,78.292,rs7209556,-0.075  
17,78.465,rs10853100,-0.087  
17,78.690,rs8064938,-0.121  
17,78.704,rs4793601,-0.124  
17,78.760,rs12942387,-0.137  
17,78.799,rs7207403,-0.158  
17,78.848,rs2293217,-0.176  
17,78.928,rs617182,-0.184  
17,78.959,rs7216993,-0.187  
17,78.966,rs2233669,-0.188  
17,78.973,rs2584684,-0.187  
17,78.976,rs4794054,-0.187  
17,78.978,rs2412101,-0.203  
17,78.979,rs1319888,-0.213  
17,78.983,rs584589,-0.190  
17,78.983,rs2671683,-0.191  
17,78.984,rs603769,-0.191  
17,78.991,rs2671650,-0.167  
17,79.033,rs6504618,-0.242  
17,79.095,rs11658310,-0.256  
17,79.109,rs2289600,-0.260  
17,79.196,rs755736,-0.309  
17,79.205,rs3785928,-0.309  
17,79.264,rs271672,-0.300  
17,79.267,rs271675,-0.301



17,79.283,rs271650,-0.316  
17,79.293,rs6504626,-0.319  
17,79.296,rs4794078,-0.317  
17,79.302,rs4794080,-0.318  
17,79.310,rs1058564,-0.332  
17,79.339,rs890397,-0.380  
17,79.343,rs6504631,-0.380  
17,79.377,rs3809762,-0.378  
17,79.404,rs4794103,-0.409  
17,79.405,rs12453363,-0.409  
17,79.416,rs2586471,-0.447  
17,79.451,rs2586431,-0.396  
17,79.472,rs1881138,-0.348  
17,79.475,rs4793645,-0.353  
17,79.484,rs1918733,-0.366  
17,79.492,rs7225245,-0.347  
17,79.501,rs2526535,-0.347  
17,79.532,rs16948970,-0.348  
17,79.560,rs9903959,-0.348  
17,79.617,rs9890721,-0.349  
17,79.627,rs1122634,-0.339  
17,79.638,rs198538,-0.331  
17,79.652,rs12936750,-0.326  
17,79.662,rs9890089,-0.343  
17,79.674,rs757420,-0.363  
17,79.681,rs1541392,-0.334  
17,79.684,rs4794173,-0.316  
17,79.689,rs4148412,-0.305  
17,79.710,rs9455,-0.277  
17,79.731,rs9911873,-0.288  
17,79.759,rs17564605,-0.319  
17,79.808,rs7221352,-0.372  
17,79.834,rs8066630,-0.424  
17,79.837,rs758634,-0.426  
17,79.874,rs9899816,-0.453  
17,79.882,rs11657251,-0.456  
17,79.893,rs9915100,-0.461  
17,79.961,rs2215290,-0.495  
17,79.969,rs2041296,-0.495  
17,79.970,rs2318785,-0.494  
17,80.067,rs11655149,-0.487  
17,80.111,rs6504721,-0.446  
17,80.123,rs7211270,-0.447  
17,80.132,rs1015759,-0.447  
17,80.144,rs4794255,-0.458  
17,80.177,rs9635758,-0.464  
17,80.181,rs7226040,-0.459  
17,80.241,rs16950253,-0.392  
17,80.251,rs4794295,-0.386  
17,80.269,rs1263963,-0.370  
17,80.290,rs1269480,-0.371  
17,80.311,rs2319453,-0.366  
17,80.323,rs9905983,-0.345  
17,80.324,rs1526182,-0.343  
17,80.337,rs9896032,-0.355  
17,80.418,rs4141125,-0.317  
17,80.425,rs203049,-0.314  
17,80.696,rs1531993,-0.292  
17,80.761,rs16951211,-0.284  
17,80.784,rs973633,-0.282  
17,81.216,rs1492233,-0.252

17,81.643,rs9902479,-0.250  
17,82.031,rs7217886,-0.246  
17,82.154,rs11870108,-0.248  
17,82.261,rs8064571,-0.249  
17,82.513,rs9898180,-0.237  
17,82.861,rs8073783,-0.189  
17,83.512,rs8070506,-0.149  
17,83.814,rs7225060,-0.126  
17,84.019,rs9898755,-0.121  
17,84.082,rs1508960,-0.120  
17,84.172,rs4347670,-0.121  
17,84.681,rs9894902,-0.140  
17,85.133,rs1457354,-0.171  
17,85.299,rs1870115,-0.186  
17,85.309,rs2045418,-0.213  
17,85.398,rs982755,-0.219  
17,85.661,rs2157768,-0.239  
17,85.978,rs1508010,-0.262  
17,86.311,rs7221015,-0.292  
17,86.670,rs12150099,-0.255  
17,86.677,rs11871253,-0.254  
17,86.708,rs1835220,-0.258  
17,87.009,rs1025905,-0.300  
17,87.089,rs1561977,-0.310  
17,87.166,rs6504928,-0.309  
17,87.202,rs9303355,-0.313  
17,87.360,rs6504933,-0.328  
17,87.378,rs2958875,-0.329  
17,87.419,rs7222848,-0.340  
17,87.430,rs9303359,-0.345  
17,87.440,rs2934894,-0.341  
17,87.447,rs2332308,-0.338  
17,87.483,rs7210248,-0.346  
17,87.487,rs8079105,-0.351  
17,87.492,rs16955329,-0.351  
17,87.550,rs8069447,-0.361  
17,87.743,rs7219986,-0.352  
17,87.745,rs244332,-0.351  
17,87.760,rs7225218,-0.276  
17,87.766,rs2214979,-0.260  
17,87.794,rs4239191,-0.241  
17,87.799,rs8068991,-0.251  
17,87.807,rs4794558,-0.270  
17,87.817,rs9911895,-0.254  
17,87.858,rs4794565,-0.275  
17,87.881,rs9911896,-0.263  
17,87.911,rs2286806,-0.247  
17,87.937,rs4794588,-0.266  
17,87.939,rs8079205,-0.268  
17,87.971,rs9908046,-0.243  
17,87.993,rs6504970,-0.225  
17,87.998,rs12603570,-0.220  
17,88.015,rs4239198,-0.198  
17,88.118,rs1549519,-0.190  
17,88.158,rs8079703,-0.194  
17,88.163,rs4270232,-0.223  
17,88.163,rs9913352,-0.225  
17,88.232,rs9907899,-0.267  
17,88.289,rs9910227,-0.272  
17,88.389,rs8082489,-0.250  
17,88.396,rs11868386,-0.247

17,88.400,rs4794617,-0.244  
17,88.416,rs1431316,-0.240  
17,88.495,rs4794624,-0.219  
17,88.573,rs9896945,-0.203  
17,88.596,rs9903956,-0.208  
17,88.627,rs11079224,-0.205  
17,88.753,rs12450049,-0.139  
17,88.768,rs17760296,-0.134  
17,88.803,rs11079240,-0.131  
17,88.829,rs17820725,-0.119  
17,88.830,rs11654392,-0.119  
17,88.882,rs227738,-0.095  
17,88.883,rs1029723,-0.095  
17,88.891,rs16957691,-0.096  
17,88.904,rs9913235,-0.105  
17,88.917,rs227666,-0.117  
17,88.918,rs227665,-0.117  
17,88.923,rs3914803,-0.115  
17,88.928,rs9913342,-0.117  
17,88.928,rs16957770,-0.117  
17,88.929,rs12150403,-0.118  
17,88.930,rs12950658,-0.118  
17,88.933,rs2049063,-0.116  
17,88.940,rs963292,-0.094  
17,89.025,rs4556852,-0.051  
17,89.034,rs11540270,-0.049  
17,89.037,rs2525997,-0.049  
17,89.043,rs205498,-0.049  
17,89.074,rs2240215,-0.050  
17,89.122,rs8072896,-0.068  
17,89.131,rs11651374,-0.073  
17,89.144,rs6503785,-0.073  
17,89.147,rs7219661,-0.075  
17,89.153,rs3213728,-0.070  
17,89.198,rs3785484,-0.093  
17,89.213,rs1007462,-0.093  
17,89.234,rs9907841,-0.111  
17,89.246,rs11079282,-0.119  
17,89.278,rs9901454,-0.128  
17,89.292,rs7222429,-0.126  
17,89.320,rs7223919,-0.114  
17,89.321,rs6503802,-0.115  
17,89.329,rs12944955,-0.118  
17,89.415,rs8075882,-0.156  
17,89.437,rs11868362,-0.160  
17,89.441,rs12951291,-0.159  
17,89.443,rs2197252,-0.159  
17,89.447,rs11659021,-0.134  
17,89.456,rs11657292,-0.130  
17,89.463,rs9915128,-0.103  
17,89.484,rs277070,-0.065  
17,89.490,rs2332933,-0.055  
17,89.500,rs2111016,-0.048  
17,89.507,rs4793859,-0.036  
17,89.510,rs1024819,-0.023  
17,89.523,rs9915530,-0.032  
17,89.527,rs9898481,-0.030  
17,89.538,rs8076384,-0.029  
17,89.543,rs9910424,-0.029  
17,89.545,rs12453873,-0.027  
17,89.555,rs4793567,-0.015

17,89.558,rs4793569,-0.011  
17,89.567,rs7211655,-0.005  
17,89.572,rs9912353,-0.006  
17,89.587,rs2586077,-0.008  
17,89.610,rs8080016,-0.015  
17,89.613,rs4793576,-0.017  
17,89.626,rs17762374,-0.021  
17,89.641,rs2585833,-0.020  
17,89.712,rs16942685,-0.056  
17,89.718,rs181241,-0.060  
17,89.735,rs1468574,-0.059  
17,89.745,rs917606,-0.045  
17,89.756,rs3826300,-0.039  
17,89.805,rs2526378,-0.055  
17,89.814,rs757485,-0.056  
17,89.937,rs368243,-0.045  
17,91.003,rs3744383,-0.061  
17,91.167,rs10853010,-0.066  
17,91.254,rs764424,-0.056  
17,91.301,rs6503919,-0.059  
17,91.818,rs1292034,-0.055  
17,91.997,rs3744375,-0.052  
17,92.545,rs11652788,-0.057  
17,92.983,rs6504016,-0.059  
17,93.068,rs3826417,-0.070  
17,93.071,rs11871179,-0.069  
17,93.091,rs1157995,-0.077  
17,93.110,rs7223292,-0.129  
17,93.116,rs3785859,-0.144  
17,93.140,rs3785848,-0.179  
17,93.142,rs4968431,-0.179  
17,93.150,rs9907597,-0.157  
17,93.187,rs9905140,-0.151  
17,93.199,rs7219870,-0.143  
17,93.202,rs740752,-0.141  
17,93.217,rs7214481,-0.148  
17,93.221,rs17601584,-0.108  
17,93.227,rs744651,-0.137  
17,93.232,rs4968435,-0.148  
17,93.233,rs4968568,-0.149  
17,93.266,rs7406786,-0.132  
17,93.273,rs2378871,-0.129  
17,93.296,rs2188728,-0.145  
17,93.327,rs7222964,-0.164  
17,93.332,rs1858990,-0.165  
17,93.456,rs2048718,-0.175  
17,93.570,rs10512493,-0.161  
17,93.612,rs3750154,-0.153  
17,93.780,rs10512496,-0.117  
17,93.874,rs2252814,-0.096  
17,94.026,rs11867290,-0.100  
17,94.036,rs11870240,-0.102  
17,94.056,rs4380108,-0.106  
17,94.528,rs2440139,-0.129  
17,94.820,rs4968647,-0.140  
17,94.866,rs4343,-0.145  
17,95.691,rs2003549,-0.256  
17,95.718,rs2058194,-0.258  
17,95.769,rs11079516,-0.262  
17,95.786,rs3760239,-0.263  
17,95.937,rs1985961,-0.234

17,96.038,rs11869535,-0.237  
17,96.333,rs12940265,-0.237  
17,96.531,rs17564408,-0.235  
17,96.807,rs1991401,-0.234  
17,97.200,rs6504249,-0.262  
17,97.698,rs4791250,-0.260  
17,97.829,rs7218921,-0.259  
17,97.856,rs8076603,-0.255  
17,97.876,rs1808918,-0.252  
17,97.890,rs4791235,-0.244  
17,97.950,rs938299,-0.243  
17,98.200,rs11079563,-0.204  
17,98.427,rs4563070,-0.193  
17,98.480,rs9892932,-0.156  
17,98.562,rs3923086,-0.175  
17,98.690,rs2107654,-0.184  
17,98.785,rs232141,-0.191  
17,98.853,rs9901736,-0.198  
17,98.866,rs7210851,-0.198  
17,99.031,rs9894277,-0.208  
17,99.072,rs2318872,-0.209  
17,99.471,rs9904627,-0.212  
17,99.480,rs874618,-0.210  
17,99.676,rs9901804,-0.174  
17,99.717,rs12450534,-0.170  
17,99.730,rs11654719,-0.171  
17,99.794,rs8069022,-0.171  
17,99.838,rs16959227,-0.167  
17,100.000,rs7218480,-0.150  
17,100.103,rs8080721,-0.130  
17,100.166,rs16960009,-0.128  
17,100.172,rs1010546,-0.129  
17,100.218,rs8081512,-0.134  
17,100.248,rs11079667,-0.137  
17,100.278,rs4303580,-0.142  
17,100.377,rs11656099,-0.164  
17,100.402,rs8464,-0.161  
17,100.412,rs12603061,-0.166  
17,100.453,rs1476813,-0.151  
17,100.497,rs3848413,-0.145  
17,100.529,rs1002327,-0.144  
17,100.570,rs1995695,-0.162  
17,100.591,rs17644943,-0.171  
17,100.654,rs1395826,-0.199  
17,100.710,rs740559,-0.213  
17,100.736,rs9892619,-0.216  
17,100.788,rs3785581,-0.234  
17,100.826,rs11650741,-0.199  
17,100.996,rs6504487,-0.200  
17,101.213,rs7214718,-0.200  
17,101.342,rs8066176,-0.201  
17,101.382,rs9903804,-0.206  
17,101.460,rs12939848,-0.216  
17,101.515,rs9902423,-0.166  
17,101.547,rs4293416,-0.165  
17,101.558,rs4791296,-0.165  
17,101.586,rs2364980,-0.166  
17,101.600,rs2364979,-0.159  
17,101.634,rs7217437,-0.132  
17,101.679,rs1808693,-0.153  
17,101.683,rs1368582,-0.153

17,101.843,rs11079697,-0.159  
17,101.897,rs2570054,-0.166  
17,101.992,rs11658071,-0.153  
17,102.041,rs2537830,-0.161  
17,102.053,rs12325881,-0.161  
17,102.093,rs7223697,-0.164  
17,102.247,rs12453460,-0.172  
17,102.310,rs1542610,-0.170  
17,102.502,rs8065171,-0.186  
17,102.960,rs7502707,-0.194  
17,103.327,rs8064607,-0.120  
17,103.344,rs8077384,-0.117  
17,103.353,rs4558468,-0.116  
17,103.501,rs3760269,-0.123  
17,103.519,rs2072268,-0.124  
17,103.529,rs758152,-0.127  
17,103.534,rs9890694,-0.108  
17,103.539,rs11657610,-0.113  
17,103.561,rs8075800,-0.134  
17,103.596,rs1558878,-0.120  
17,103.612,rs16972915,-0.132  
17,103.625,rs7224186,-0.143  
17,103.635,rs2160725,-0.151  
17,103.744,rs7350947,-0.115  
17,103.757,rs4968897,-0.113  
17,103.825,rs8068202,-0.110  
17,103.914,rs4968906,-0.098  
17,103.956,rs4968810,-0.107  
17,103.982,rs2278445,-0.120  
17,103.983,rs9906395,-0.101  
17,104.002,rs4968816,-0.100  
17,104.025,rs4968932,-0.085  
17,104.034,rs4246425,-0.074  
17,104.051,rs4368217,-0.067  
17,104.107,rs1348372,-0.053  
17,104.135,rs9901473,-0.051  
17,104.157,rs1470291,-0.049  
17,104.185,rs9893368,-0.048  
17,104.198,rs17682084,-0.046  
17,104.388,rs11650611,-0.017  
17,104.495,rs11077922,-0.020  
17,104.735,rs6501291,-0.015  
17,104.815,rs536009,-0.017  
17,104.867,rs17686852,-0.020  
17,105.019,rs8071378,-0.036  
17,105.068,rs1972933,-0.042  
17,105.095,rs2586543,-0.049  
17,105.098,rs2440134,-0.050  
17,105.101,rs6501328,-0.056  
17,105.104,rs2716227,-0.063  
17,105.112,rs9895446,-0.061  
17,105.157,rs2521348,-0.053  
17,105.197,rs11869376,-0.059  
17,105.242,rs9916229,-0.067  
17,105.275,rs16974218,-0.068  
17,105.648,rs16974415,-0.079  
17,105.656,rs1029413,-0.079  
17,105.727,rs9899925,-0.086  
17,105.850,rs12948136,-0.096  
17,105.856,rs7214067,-0.096  
17,105.903,rs6501358,-0.105

17,106.230,rs2215006,-0.139  
17,106.241,rs8079702,-0.105  
17,106.257,rs1468473,-0.113  
17,106.278,rs236528,-0.129  
17,106.416,rs312729,-0.099  
17,106.496,rs3848451,-0.100  
17,107.057,rs9899840,-0.106  
17,107.421,rs10512540,-0.112  
17,107.628,rs1431454,-0.115  
17,108.048,rs7220635,-0.131  
17,108.073,rs7214537,-0.134  
17,108.202,rs2041265,-0.153  
17,108.205,rs17763811,-0.154  
17,108.458,rs9907787,-0.190  
17,108.465,rs16976207,-0.191  
17,108.537,rs8069222,-0.175  
17,108.540,rs12952611,-0.176  
17,108.623,rs2190553,-0.187  
17,108.643,rs1015657,-0.190  
17,108.769,rs12936614,-0.199  
17,108.811,rs4793323,-0.199  
17,108.889,rs2190550,-0.158  
17,108.909,rs4793325,-0.161  
17,108.918,rs9889988,-0.170  
17,108.990,rs10512559,-0.230  
17,109.233,rs12452913,-0.249  
17,109.501,rs17824822,-0.255  
17,109.521,rs6501448,-0.256  
17,109.596,rs983085,-0.255  
17,109.680,rs12946942,-0.273  
17,109.761,rs981004,-0.290  
17,109.931,rs12951634,-0.318  
17,109.983,rs969264,-0.324  
17,110.016,rs725545,-0.320  
17,110.121,rs2367391,-0.305  
17,110.537,rs16976696,-0.256  
17,110.548,rs7219970,-0.255  
17,110.566,rs9911758,-0.254  
17,110.923,rs11871027,-0.253  
17,111.268,rs9674884,-0.260  
17,111.507,rs9897758,-0.272  
17,111.560,rs4793360,-0.274  
17,111.575,rs12451845,-0.274  
17,112.121,rs7217175,-0.317  
17,112.559,rs2430514,-0.295  
17,112.900,rs2430549,-0.266  
17,113.252,rs7213040,-0.253  
17,113.314,rs7214582,-0.240  
17,113.465,rs2216167,-0.212  
17,113.470,rs12451606,-0.210  
17,113.517,rs1861495,-0.176  
17,113.554,rs8077886,-0.143  
17,113.574,rs8077585,-0.140  
17,113.612,rs4793307,-0.116  
17,113.630,rs2060095,-0.103  
17,113.638,rs1110614,-0.098  
17,113.653,rs2713980,-0.092  
17,113.667,rs755675,-0.090  
17,113.687,rs2060097,-0.089  
17,113.819,rs7503865,-0.100  
17,113.847,rs4506975,-0.098

17,113.887,rs3606,-0.104  
17,113.897,rs6501581,-0.109  
17,113.903,rs17780885,-0.106  
17,113.907,rs8076418,-0.113  
17,113.908,rs2466529,-0.115  
17,113.947,rs4969040,-0.123  
17,113.948,rs2452919,-0.123  
17,113.970,rs2466511,-0.140  
17,113.996,rs17781029,-0.161  
17,114.007,rs8073204,-0.172  
17,114.089,rs9916389,-0.279  
17,114.095,rs8081534,-0.269  
17,114.122,rs2131606,-0.217  
17,114.126,rs9910686,-0.213  
17,114.132,rs7222812,-0.216  
17,114.137,rs8081059,-0.218  
17,114.153,rs4969058,-0.222  
17,114.161,rs7224603,-0.217  
17,114.189,rs12938854,-0.196  
17,114.201,rs11656399,-0.160  
17,114.220,rs4969011,-0.161  
17,114.237,rs10153314,-0.174  
17,114.266,rs1037257,-0.190  
17,114.420,rs7211297,-0.199  
17,114.470,rs3751928,-0.206  
17,114.528,rs4969099,-0.182  
17,114.603,rs2279730,-0.209  
17,114.611,rs2279732,-0.211  
17,114.647,rs9914611,-0.208  
17,114.670,rs1566295,-0.206  
17,114.727,rs6501633,-0.231  
17,114.795,rs11077682,-0.174  
17,114.808,rs12232541,-0.164  
17,114.825,rs4789644,-0.161  
17,114.876,rs1872076,-0.152  
17,114.930,rs9893375,-0.132  
17,114.952,rs7406421,-0.124  
17,114.978,rs8075553,-0.122  
17,115.084,rs2014209,-0.114  
17,115.109,rs12952485,-0.138  
17,115.139,rs323406,-0.153  
17,115.145,rs12452401,-0.151  
17,115.165,rs9903880,-0.133  
17,115.177,rs323413,-0.137  
17,115.182,rs1552013,-0.127  
17,115.189,rs17249698,-0.113  
17,115.190,rs2683154,-0.111  
17,115.207,rs7214374,-0.117  
17,115.220,rs17192023,-0.119  
17,115.242,rs2586841,-0.137  
17,115.247,rs2586794,-0.141  
17,115.257,rs4789011,-0.125  
17,115.261,rs4789538,-0.145  
17,115.262,rs7406805,-0.145  
17,115.276,rs6501667,-0.130  
17,115.301,rs16977829,-0.132  
17,115.329,rs755803,-0.135  
17,115.371,rs8077392,-0.119  
17,115.382,rs9902475,-0.116  
17,115.383,rs1110195,-0.116  
17,115.435,rs6501676,-0.103



17,115.574,rs952410,-0.070  
17,115.643,rs6501679,-0.164  
17,115.681,rs11077722,-0.182  
17,115.707,rs7406779,-0.199  
17,115.827,rs1007482,-0.272  
17,115.861,rs8080915,-0.278  
17,116.062,rs4789620,-0.280  
17,116.080,rs11655133,-0.279  
17,116.218,rs4789626,-0.268  
17,116.236,rs7211140,-0.354  
17,116.281,rs4789632,-0.399  
17,116.481,rs11650353,-0.428  
17,116.499,rs1877686,-0.430  
17,116.641,rs8082699,-0.544  
17,116.666,rs2100896,-0.565  
17,116.716,rs2382642,-0.559  
17,116.761,rs2382646,-0.529  
17,116.781,rs2891034,-0.516  
17,116.978,rs1048367,-0.479  
17,117.047,rs8070953,-0.490  
17,117.170,rs884802,-0.548  
17,117.308,rs1699596,-0.519  
17,117.486,rs783018,-0.557  
17,117.521,rs532544,-0.615  
17,117.540,rs8081794,-0.620  
17,117.676,rs1037170,-0.638  
17,117.785,rs3178300,-0.588  
17,117.887,rs10775365,-0.537  
17,118.079,rs689730,-0.540  
17,118.449,rs8078766,-0.499  
17,118.509,rs4789112,-0.506  
17,118.524,rs1044433,-0.505  
17,119.016,rs9906330,-0.532  
17,119.429,rs4789145,-0.551  
17,120.725,rs9913538,-0.505  
17,120.777,rs1671021,-0.545  
17,120.782,rs9910321,-0.546  
17,120.825,rs3744000,-0.556  
17,120.840,rs820388,-0.535  
17,120.845,rs7207208,-0.535  
17,121.385,rs11077799,-0.514  
17,121.521,rs6501847,-0.513  
17,122.168,rs2585738,-0.482  
17,122.283,rs1868827,-0.484  
17,122.403,rs4505373,-0.486  
17,122.707,rs4789267,-0.449  
17,122.880,rs346794,-0.473  
17,122.939,rs11077813,-0.507  
17,123.418,rs11077820,-0.512  
17,123.600,rs12948783,-0.550  
17,123.852,rs3744050,-0.601  
17,123.876,rs2120886,-0.603  
17,123.931,rs2304921,-0.604  
17,124.093,rs1860351,-0.605  
17,124.523,rs11868472,-0.578  
17,124.578,rs1014390,-0.587  
17,124.678,rs237054,-0.604  
17,125.279,rs563079,-0.668  
17,125.379,rs644871,-0.683  
17,125.661,rs491914,-0.639  
17,125.762,rs11077876,-0.641

17,125.779,rs736100,-0.629  
17,125.792,rs11868104,-0.616  
17,125.895,rs4789378,-0.479  
17,126.039,rs4289018,-0.516  
17,126.176,rs4788961,-0.584  
17,126.250,rs9912563,-0.553  
17,126.328,rs3848393,-0.540  
17,126.506,rs4788966,-0.555  
17,126.542,rs9890579,-0.546  
17,126.544,rs7209713,-0.546  
17,126.598,rs2083774,-0.547  
17,126.672,rs12948945,-0.592  
17,126.766,rs1318555,-0.640  
17,126.940,rs720825,-0.833  
17,127.012,rs16969661,-0.845  
17,127.079,rs501316,-0.839  
17,127.148,rs4788978,-0.824  
17,127.277,rs551263,-0.806  
17,127.388,rs633672,-0.794  
17,127.698,rs8078846,-0.747  
17,127.993,rs11656081,-0.723  
17,128.084,rs11655883,-0.705  
17,128.174,rs2174919,-0.697  
17,128.237,rs647861,-0.695  
17,128.269,rs2411107,-0.692  
17,128.854,rs4789448,-0.629  
17,128.914,rs402357,-0.610  
17,129.035,rs1078504,-0.588  
17,129.060,rs93075,-0.582  
17,129.166,rs1077817,-0.576  
17,129.383,rs11077909,-0.560  
17,129.747,rs312818,-0.550  
17,129.870,rs1865740,-0.578  
17,129.898,rs4462668,-0.580  
17,129.907,rs9900113,-0.584  
17,129.925,rs8070652,-0.588  
17,129.938,rs16970220,-0.594  
17,129.941,rs12947286,-0.596  
17,130.000,rs11077916,-0.554  
17,130.051,rs11077917,-0.538  
17,130.074,rs7214455,-0.494  
17,130.077,rs1108759,-0.483  
17,130.099,rs4349216,-0.444  
17,130.104,rs12949359,-0.455  
17,130.111,rs7215957,-0.426  
17,130.113,rs7215702,-0.429  
17,130.114,rs12452835,-0.428  
17,130.226,rs4789484,-0.397  
17,130.232,rs16848,-0.387  
17,130.314,rs9902073,-0.389  
17,130.399,rs7210773,-0.388  
17,130.403,rs8064943,-0.388  
17,130.419,rs9907505,-0.392  
17,130.497,rs2033719,-0.445  
17,130.525,rs8075300,-0.436  
17,130.570,rs4789490,-0.432  
17,130.581,rs2053236,-0.431  
17,130.638,rs9894524,-0.435  
17,130.668,rs8080480,-0.436  
17,130.717,rs735658,-0.420  
17,131.140,rs17639398,-0.424

17,131.185,rs4411562,-0.432  
17,131.265,rs12051678,-0.454  
17,131.337,rs9807014,-0.458  
17,131.374,rs3813026,-0.502  
17,131.422,rs7217374,-0.571  
17,131.466,rs2292235,-0.618  
17,131.488,rs12232476,-0.625  
17,131.494,rs2661679,-0.625  
17,131.504,rs9897269,-0.624  
17,131.548,rs8072874,-0.586  
17,131.608,rs11655650,-0.534  
17,131.635,rs9907137,-0.539  
17,131.655,rs7211218,-0.540  
17,131.683,rs1109278,-0.607  
17,131.696,rs8064645,-0.589  
17,131.722,rs6501186,-0.517  
17,131.729,rs749885,-0.512  
17,131.744,rs12602395,-0.537  
17,131.830,rs9904782,-0.674  
17,131.863,rs4789577,-0.702  
17,131.878,rs7222391,-0.705  
17,131.890,rs7221341,-0.700  
17,132.040,rs17561950,-0.551  
17,132.154,rs632058,-0.438  
17,132.157,rs11649879,-0.441  
17,132.197,rs2289754,-0.479  
17,132.240,rs7405830,-0.508  
17,132.279,rs11077372,-0.539  
17,132.304,rs930572,-0.559  
17,132.325,rs1867475,-0.568  
17,132.333,rs12600766,-0.571  
17,132.361,rs642612,-0.576  
17,132.411,rs4969151,-0.603  
17,132.447,rs11867901,-0.641  
17,132.454,rs1108367,-0.648  
17,132.468,rs9302881,-0.707  
17,132.502,rs7222201,-0.822  
17,132.503,rs9890266,-0.822  
17,132.551,rs4969205,-0.765  
17,132.585,rs12953053,-0.714  
17,132.589,rs9889754,-0.708  
17,132.590,rs4796808,-0.706  
17,133.006,rs12944556,-0.568  
17,133.078,rs1110274,-0.545  
17,133.222,rs9900972,-0.532  
17,133.230,rs7218237,-0.531  
17,133.285,rs3744787,-0.523  
17,133.295,rs4789936,-0.521  
17,133.398,rs7216022,-0.544  
17,133.399,rs4789921,-0.544  
17,133.474,rs11077405,-0.554  
17,133.661,rs3803780,-0.577  
17,133.787,rs7212486,-0.588  
17,133.855,rs2007979,-0.572  
17,133.888,rs7214618,-0.584  
17,133.899,rs7211056,-0.586  
17,133.909,rs1675273,-0.647  
17,133.910,rs4789950,-0.652  
17,134.013,rs2703519,-0.557  
17,134.026,rs2703549,-0.514  
17,134.054,rs4789956,-0.563

17,134.073,rs2606193,-0.596  
17,134.096,rs17674253,-0.670  
17,134.104,rs12603684,-0.654  
17,134.120,rs4789963,-0.625  
17,134.144,rs11656929,-0.628  
17,134.152,rs12051618,-0.629  
17,134.199,rs12603748,-0.631  
17,134.242,rs9906538,-0.615  
17,134.266,rs11658702,-0.558  
17,134.292,rs4790001,-0.504  
17,134.321,rs11871435,-0.483  
17,134.331,rs12949118,-0.490  
17,134.357,rs12600765,-0.505  
17,134.454,rs4790018,-0.431  
17,134.462,rs7215470,-0.440  
17,134.465,rs4790022,-0.443  
17,134.481,rs4789892,-0.490  
17,134.486,rs4790023,-0.504  
17,134.489,rs7208287,-0.513  
17,134.500,rs7225361,-0.514  
17,134.519,rs7225663,-0.471  
17,134.551,rs2377405,-0.451  
17,134.597,rs8075392,-0.480  
17,134.625,rs2137772,-0.467  
17,134.652,rs7224144,-0.449  
17,134.695,rs871739,-0.481  
17,134.748,rs296143,-0.443  
17,134.885,rs7216806,-0.402  
17,134.901,rs4073995,-0.396  
17,135.330,rs9900295,-0.140  
17,135.431,rs8064780,-0.106  
17,135.434,rs7217395,-0.105  
17,135.526,rs2587507,-0.097  
17,135.548,rs9898405,-0.095  
17,135.667,rs8078624,-0.094  
17,135.691,rs2362396,-0.092  
17,135.720,rs8069143,-0.081  
17,135.736,rs3843732,-0.073  
17,135.783,rs1696784,-0.057  
17,135.842,rs1124736,-0.058  
17,135.862,rs12451638,-0.060  
17,135.873,rs1285293,-0.061  
17,135.890,rs7211532,-0.068  
17,135.947,rs4441315,-0.070  
17,136.005,rs4074023,-0.060  
17,136.257,rs2304851,-0.062  
17,136.335,rs8077849,-0.063  
17,136.444,rs12602462,-0.064  
17,136.494,rs8068433,-0.055  
17,136.528,rs11652075,-0.052  
17,136.543,rs9894254,-0.050  
17,136.614,rs6420489,-0.040  
17,136.719,rs7219131,-0.037  
17,137.005,rs3185057,-0.037  
17,137.016,rs8359,-0.037  
17,137.143,rs9914610,-0.037  
17,137.190,rs4563088,-0.026  
17,137.427,rs7209040,-0.018  
17,137.773,rs9901366,-0.007  
17,137.802,rs12948054,-0.007  
17,138.083,rs2672886,-0.005

17,138.103,rs2048753,-0.005  
17,138.114,rs7221948,-0.005  
17,138.178,rs2589158,-0.004  
17,138.202,rs2672893,-0.003  
17,138.219,rs2672890,-0.002  
17,138.256,rs6565484,-0.001  
17,138.374,rs9897968,-0.002  
17,138.491,rs1062935,-0.006  
17,138.572,rs8081168,-0.009  
17,138.626,rs7225916,-0.015  
17,138.662,rs4969349,-0.021  
17,138.715,rs8079626,-0.038  
17,138.738,rs9901648,-0.044  
17,138.760,rs4076037,-0.038  
17,138.877,rs4969391,-0.042  
17,138.919,rs4969254,-0.037  
17,138.952,rs4969259,-0.030  
17,138.988,rs7209950,-0.022  
17,139.022,rs2659046,-0.016  
17,139.138,rs2659029,-0.010  
17,139.220,rs6565548,-0.006  
17,139.380,rs7212109,-0.008  
17,139.546,rs8073897,-0.003  
17,139.588,rs8070792,-0.002  
17,139.616,rs1701,-0.002  
17,139.831,rs7406505,-0.000  
17,139.855,rs8079717,-0.000  
17,139.903,rs7211870,-0.000  
17,140.185,rs9894429,-0.000  
17,140.253,rs3830068,0.000  
17,140.445,rs9319620,-0.000  
17,140.723,rs2070871,-0.000  
17,141.208,rs4969481,-0.000  
17,141.238,rs6502048,-0.001  
17,141.246,rs9915228,-0.001  
17,141.446,rs11077969,0.001  
17,141.764,rs11653735,0.009  
17,141.807,rs4789846,0.010  
17,141.971,rs4789763,0.019  
17,142.008,rs8081117,0.020  
17,142.188,rs8072110,0.027  
17,142.403,rs7221018,0.031  
17,142.466,rs9894993,0.053  
17,142.667,rs3794716,0.063  
17,142.755,rs4789814,0.061  
17,142.806,rs2011631,0.072  
17,142.844,rs9912932,0.081  
17,143.181,rs868203,0.087  
17,143.222,rs2677919,0.087  
17,143.512,rs3785512,0.099  
17,143.638,rs1551628,0.101  
17,143.781,rs7405957,0.104  
17,143.870,rs11652770,0.105  
17,143.911,rs6502043,0.105  
18,0.024,rs652504,-0.008  
18,0.062,rs7239756,-0.008  
18,0.094,rs8088001,-0.008  
18,0.126,rs596551,-0.009  
18,0.223,rs505110,-0.011  
18,0.226,rs18485,-0.011  
18,0.229,rs11081025,-0.012

18,0.260,rs7236553,-0.010  
18,0.280,rs8086522,-0.009  
18,0.307,rs1296194,-0.011  
18,0.313,rs618671,-0.012  
18,0.331,rs3929952,-0.033  
18,0.371,rs9959369,-0.043  
18,0.448,rs4798145,-0.045  
18,0.488,rs2621178,-0.047  
18,0.498,rs2621201,-0.048  
18,0.557,rs12962668,-0.052  
18,0.648,rs2846662,-0.064  
18,0.697,rs1564419,-0.085  
18,0.735,rs959015,-0.076  
18,0.796,rs7235748,-0.070  
18,0.873,rs7244087,-0.060  
18,0.921,rs12959798,-0.061  
18,0.977,rs514253,-0.049  
18,1.038,rs16947340,-0.041  
18,1.044,rs505171,-0.040  
18,1.048,rs527383,-0.058  
18,1.052,rs4798418,-0.052  
18,1.053,rs9947236,-0.051  
18,1.053,rs2219281,-0.039  
18,1.059,rs11660343,-0.041  
18,1.081,rs483655,-0.048  
18,1.104,rs518471,-0.053  
18,1.144,rs1004961,-0.094  
18,1.205,rs505140,-0.109  
18,1.274,rs485562,-0.094  
18,1.308,rs13381189,-0.098  
18,1.393,rs13381806,-0.113  
18,1.426,rs9966612,-0.108  
18,1.458,rs2244500,-0.096  
18,1.531,rs2847154,-0.094  
18,1.592,rs9952691,-0.089  
18,1.749,rs8093865,-0.074  
18,1.900,rs10468774,-0.051  
18,1.967,rs7244120,-0.041  
18,1.980,rs1291183,-0.031  
18,1.997,rs1544241,-0.029  
18,2.093,rs4797325,-0.016  
18,2.101,rs2040176,-0.016  
18,2.124,rs17500692,-0.015  
18,2.151,rs1610037,-0.014  
18,2.283,rs8090931,-0.026  
18,2.307,rs9964808,-0.030  
18,2.422,rs789071,-0.032  
18,2.434,rs1523398,-0.032  
18,2.447,rs7232873,-0.032  
18,2.527,rs1022177,-0.034  
18,2.541,rs12953819,-0.034  
18,2.582,rs9951158,-0.035  
18,2.658,rs304398,-0.030  
18,2.946,rs9954959,-0.024  
18,3.001,rs12709528,-0.024  
18,3.752,rs1395956,-0.036  
18,3.851,rs1941669,-0.033  
18,3.946,rs1941663,-0.029  
18,4.000,rs2193727,-0.019  
18,4.362,rs2219122,-0.014  
18,4.448,rs1563188,-0.014

18,4.491,rs2028327,-0.015  
18,4.555,rs4600536,-0.012  
18,4.614,rs10853266,-0.010  
18,4.627,rs1439420,-0.009  
18,4.934,rs313038,-0.003  
18,4.957,rs1397060,-0.002  
18,4.968,rs12607691,-0.003  
18,5.000,rs4797949,-0.008  
18,5.069,rs9966123,-0.009  
18,5.175,rs1009238,-0.009  
18,5.270,rs9959376,-0.024  
18,5.275,rs9956834,-0.024  
18,5.277,rs10468721,-0.025  
18,5.408,rs473110,-0.086  
18,5.437,rs7229380,-0.087  
18,5.482,rs9949777,-0.104  
18,5.573,rs8089407,-0.084  
18,5.623,rs668679,-0.075  
18,5.642,rs11659972,-0.074  
18,5.734,rs513990,-0.082  
18,5.767,rs8082981,-0.082  
18,5.840,rs670003,-0.075  
18,5.955,rs642237,-0.094  
18,6.040,rs16943056,-0.094  
18,6.081,rs9303900,-0.093  
18,6.106,rs8086975,-0.092  
18,6.174,rs16943104,-0.071  
18,6.316,rs8094785,-0.053  
18,6.446,rs3914786,-0.029  
18,6.466,rs8096586,-0.028  
18,6.475,rs3914792,-0.028  
18,6.541,rs2347267,-0.024  
18,6.660,rs770238,-0.023  
18,6.737,rs16943442,-0.031  
18,6.827,rs12953815,-0.043  
18,6.838,rs8093338,-0.044  
18,6.964,rs7237881,-0.082  
18,7.030,rs611187,-0.086  
18,7.256,rs8092725,-0.100  
18,7.479,rs10163754,-0.085  
18,7.520,rs11664521,-0.085  
18,7.550,rs1893152,-0.085  
18,7.667,rs679153,-0.080  
18,7.680,rs16943929,-0.079  
18,7.697,rs7226712,-0.078  
18,7.724,rs8097282,-0.072  
18,7.810,rs3826638,-0.061  
18,7.814,rs16943989,-0.061  
18,7.850,rs11080994,-0.076  
18,7.859,rs16944003,-0.082  
18,7.962,rs3745013,-0.132  
18,7.975,rs1164,-0.132  
18,8.278,rs1539791,-0.153  
18,8.454,rs661767,-0.166  
18,8.530,rs678156,-0.164  
18,8.626,rs4798055,-0.161  
18,8.770,rs4414562,-0.140  
18,8.901,rs2230164,-0.106  
18,8.949,rs8098020,-0.100  
18,9.023,rs7506674,-0.087  
18,9.039,rs6506070,-0.087

18,9.094,rs9951849,-0.087  
18,9.116,rs10853291,-0.086  
18,9.152,rs11872867,-0.084  
18,9.164,rs4340411,-0.083  
18,9.211,rs7227251,-0.084  
18,9.245,rs717183,-0.103  
18,9.277,rs2034069,-0.103  
18,9.359,rs12961250,-0.107  
18,9.377,rs1662304,-0.108  
18,9.386,rs1662807,-0.111  
18,9.450,rs8092567,-0.146  
18,9.473,rs2028636,-0.154  
18,9.494,rs4798089,-0.138  
18,9.496,rs9954608,-0.137  
18,9.546,rs12457997,-0.108  
18,9.567,rs1020301,-0.090  
18,9.606,rs238135,-0.065  
18,9.611,rs238533,-0.063  
18,9.624,rs7229123,-0.059  
18,9.682,rs238120,-0.051  
18,9.690,rs11664141,-0.049  
18,9.692,rs10513868,-0.047  
18,9.693,rs238113,-0.047  
18,9.715,rs3786455,-0.038  
18,9.733,rs510668,-0.028  
18,9.735,rs477347,-0.028  
18,9.749,rs16945001,-0.027  
18,9.939,rs7232859,-0.016  
18,9.982,rs16945066,-0.014  
18,10.071,rs3888225,-0.012  
18,10.125,rs1787846,-0.014  
18,10.149,rs3866988,-0.016  
18,10.156,rs17725070,-0.010  
18,10.170,rs16945135,-0.010  
18,10.212,rs2290871,-0.010  
18,10.267,rs7230740,-0.013  
18,10.468,rs414273,-0.014  
18,10.504,rs8097308,-0.014  
18,10.651,rs4798110,-0.025  
18,10.690,rs7235163,-0.031  
18,10.771,rs11873533,-0.037  
18,10.796,rs3786446,-0.033  
18,10.797,rs11659558,-0.033  
18,10.892,rs3959690,-0.028  
18,10.979,rs8096244,-0.031  
18,10.992,rs4798131,-0.031  
18,11.157,rs9961715,-0.028  
18,11.273,rs3915772,-0.025  
18,11.338,rs7244051,-0.024  
18,11.360,rs9963685,-0.021  
18,11.443,rs4798141,-0.013  
18,11.561,rs1442366,-0.004  
18,11.575,rs4798147,-0.004  
18,11.713,rs1465947,-0.012  
18,11.741,rs11664384,-0.013  
18,11.791,rs9966360,-0.017  
18,11.800,rs7228506,-0.016  
18,11.877,rs1372631,-0.007  
18,11.939,rs2872873,-0.009  
18,11.963,rs1442373,-0.007  
18,11.969,rs1442378,-0.007



18,12.051,rs11661443,-0.007  
18,12.251,rs1040277,-0.009  
18,12.416,rs1607970,-0.015  
18,12.426,rs7239719,-0.016  
18,12.558,rs12455349,-0.031  
18,12.566,rs628229,-0.031  
18,12.901,rs4550556,-0.044  
18,12.961,rs4624288,-0.041  
18,12.980,rs9967269,-0.019  
18,13.087,rs8085726,-0.005  
18,13.197,rs12963270,-0.007  
18,13.223,rs12968150,-0.007  
18,13.405,rs11081119,-0.006  
18,13.411,rs280976,-0.006  
18,13.481,rs1979943,-0.005  
18,13.649,rs4798233,-0.006  
18,13.720,rs1701506,-0.006  
18,13.804,rs8098335,-0.011  
18,13.885,rs7231700,-0.013  
18,14.038,rs2847108,-0.007  
18,14.057,rs8096913,-0.007  
18,14.199,rs1658191,-0.008  
18,14.214,rs2186884,-0.007  
18,14.317,rs9954107,-0.008  
18,14.606,rs8096374,-0.017  
18,14.634,rs8096497,-0.028  
18,14.637,rs11081148,-0.013  
18,14.720,rs6506251,-0.014  
18,14.779,rs10438879,-0.014  
18,15.086,rs4798261,-0.015  
18,15.258,rs1587543,-0.009  
18,15.286,rs1466882,-0.009  
18,15.316,rs8085931,-0.008  
18,15.616,rs188357,-0.002  
18,15.623,rs4455065,-0.002  
18,15.697,rs292367,-0.002  
18,15.835,rs12964135,-0.003  
18,15.864,rs599322,-0.002  
18,15.892,rs9961211,-0.002  
18,15.900,rs397175,-0.002  
18,16.011,rs11875045,-0.000  
18,16.157,rs7244505,-0.002  
18,16.496,rs1109434,-0.013  
18,16.515,rs12953610,-0.014  
18,16.586,rs629258,-0.017  
18,16.674,rs603313,-0.016  
18,16.714,rs11665528,-0.019  
18,16.794,rs11081186,-0.020  
18,16.811,rs4798341,-0.021  
18,16.822,rs7236529,-0.012  
18,16.838,rs4387679,-0.012  
18,16.865,rs17466502,-0.009  
18,16.877,rs7237323,-0.007  
18,16.893,rs12458297,-0.005  
18,16.900,rs10775435,-0.005  
18,16.916,rs9965051,-0.002  
18,16.982,rs8091944,-0.002  
18,16.985,rs8090286,-0.002  
18,16.993,rs12458743,-0.002  
18,17.035,rs1785382,-0.000  
18,17.171,rs11660230,0.000

18,17.205,rs1940995,0.002  
18,17.274,rs4797219,0.002  
18,17.300,rs8090662,0.002  
18,17.453,rs9635816,0.002  
18,17.526,rs4798405,0.003  
18,17.561,rs1917917,0.003  
18,17.690,rs11877277,0.009  
18,17.843,rs8093690,0.027  
18,17.969,rs6506343,0.029  
18,18.111,rs9948128,0.020  
18,18.219,rs11876129,0.026  
18,18.338,rs724676,0.035  
18,18.370,rs635546,0.030  
18,18.379,rs736632,0.032  
18,18.425,rs571298,0.030  
18,18.436,rs948229,0.028  
18,18.438,rs549827,0.028  
18,18.460,rs11661271,0.030  
18,18.481,rs4644934,0.017  
18,18.518,rs7239905,0.016  
18,18.606,rs4798428,0.016  
18,18.619,rs12457334,0.016  
18,18.703,rs607840,0.027  
18,18.768,rs1785234,0.029  
18,19.231,rs7228441,0.038  
18,19.776,rs408299,0.039  
18,19.788,rs636589,0.039  
18,20.320,rs341201,0.047  
18,20.512,rs882838,0.062  
18,20.550,rs1426333,0.062  
18,20.752,rs9963268,0.066  
18,20.799,rs12458804,0.086  
18,20.893,rs4798452,0.086  
18,20.918,rs12967361,0.083  
18,21.062,rs1941500,0.072  
18,21.142,rs8096595,0.060  
18,21.257,rs12326052,0.049  
18,21.328,rs1941491,0.043  
18,21.368,rs12607650,0.035  
18,21.433,rs1941509,0.031  
18,21.460,rs11663318,0.022  
18,21.600,rs1941492,0.012  
18,21.604,rs9947929,0.012  
18,21.905,rs7506974,0.014  
18,22.083,rs9965330,0.023  
18,22.437,rs1431385,0.076  
18,22.437,rs8095228,0.076  
18,22.604,rs1241983,0.151  
18,22.674,rs1116757,0.165  
18,22.921,rs530612,0.172  
18,22.958,rs17439137,0.173  
18,22.987,rs509497,0.148  
18,23.089,rs541770,0.113  
18,23.102,rs568176,0.108  
18,23.163,rs4239330,0.075  
18,23.187,rs693754,0.065  
18,23.352,rs600695,0.046  
18,23.387,rs648161,0.045  
18,23.565,rs16951199,0.037  
18,23.587,rs2065551,0.036  
18,23.607,rs1466421,0.039

18,23.610,rs10853343,0.039  
18,23.633,rs2045781,0.039  
18,23.669,rs12955222,0.038  
18,23.725,rs984355,0.030  
18,23.962,rs450015,0.036  
18,23.998,rs406756,0.049  
18,24.075,rs7231458,0.040  
18,24.094,rs12966305,0.041  
18,24.234,rs965992,0.047  
18,24.361,rs4797283,0.068  
18,24.459,rs883105,0.072  
18,24.910,rs4798561,0.119  
18,24.954,rs12966566,0.109  
18,24.989,rs9962232,0.115  
18,25.006,rs16951664,0.121  
18,25.369,rs555107,0.084  
18,25.371,rs497065,0.084  
18,25.413,rs12605481,0.078  
18,25.509,rs956551,0.065  
18,25.675,rs1941137,0.060  
18,25.879,rs8099410,0.035  
18,25.904,rs661059,0.024  
18,25.905,rs7236946,0.016  
18,25.909,rs7236295,0.033  
18,26.066,rs607396,0.021  
18,26.078,rs1374104,0.019  
18,26.303,rs1992373,0.002  
18,26.317,rs1443604,0.006  
18,26.318,rs16952588,0.006  
18,26.462,rs12960805,0.005  
18,26.816,rs567595,0.001  
18,26.817,rs1468707,0.001  
18,26.901,rs1942956,0.001  
18,26.923,rs3794959,0.001  
18,27.203,rs4399595,0.006  
18,27.309,rs7505928,0.011  
18,27.320,rs6506569,0.011  
18,27.379,rs16953216,0.017  
18,27.384,rs10163905,0.017  
18,27.469,rs12456630,0.015  
18,27.508,rs2005039,0.015  
18,27.516,rs686693,0.016  
18,27.531,rs8094662,0.015  
18,27.640,rs635269,0.010  
18,27.684,rs675417,0.006  
18,27.731,rs17493589,0.006  
18,27.770,rs658069,0.002  
18,27.792,rs12964134,0.001  
18,27.795,rs4798645,0.001  
18,27.864,rs12457756,0.010  
18,27.907,rs2156472,0.010  
18,27.989,rs11876268,0.003  
18,27.994,rs9955691,0.007  
18,28.012,rs12455669,0.007  
18,28.036,rs17582975,0.007  
18,28.058,rs4505407,0.007  
18,28.214,rs321663,0.016  
18,28.285,rs422303,0.032  
18,28.291,rs400839,0.031  
18,28.376,rs10502379,0.025  
18,28.456,rs1249489,0.021

18,28.466,rs1249488,0.043  
18,28.542,rs693405,0.058  
18,28.701,rs484913,0.072  
18,28.747,rs9807413,0.078  
18,28.806,rs656602,0.085  
18,28.816,rs16954333,0.087  
18,28.826,rs595802,0.087  
18,28.854,rs12962546,0.089  
18,28.875,rs10502382,0.089  
18,28.911,rs690336,0.089  
18,28.983,rs7236228,0.082  
18,29.049,rs631729,0.074  
18,29.173,rs4798720,0.061  
18,29.195,rs11663850,0.060  
18,29.220,rs12956492,0.057  
18,29.310,rs4798736,0.049  
18,29.334,rs8095138,0.043  
18,29.363,rs4798750,0.036  
18,29.462,rs12965084,0.033  
18,29.499,rs9951585,0.031  
18,30.300,rs2864527,0.007  
18,30.335,rs9963940,0.006  
18,30.521,rs12455836,0.005  
18,30.582,rs7245034,0.006  
18,30.723,rs4798812,0.012  
18,31.018,rs1813100,0.016  
18,31.057,rs10853380,0.017  
18,31.165,rs7245068,0.015  
18,31.370,rs11872991,0.013  
18,31.425,rs7244365,0.014  
18,31.506,rs8083190,0.015  
18,31.596,rs613536,0.007  
18,31.616,rs930841,0.007  
18,31.707,rs9963622,0.011  
18,31.715,rs7238992,0.011  
18,31.756,rs16955490,0.013  
18,31.758,rs921835,0.013  
18,31.770,rs11659898,0.014  
18,31.786,rs4798850,0.015  
18,31.811,rs9304044,0.020  
18,31.818,rs9951109,0.021  
18,31.876,rs9962736,0.034  
18,31.934,rs16955629,0.021  
18,31.983,rs8082842,0.020  
18,32.160,rs9304048,0.035  
18,32.166,rs661556,0.035  
18,32.289,rs492369,0.033  
18,32.420,rs7237794,0.030  
18,32.475,rs29063,0.028  
18,32.552,rs4239278,0.027  
18,32.574,rs29029,0.026  
18,32.734,rs610573,0.029  
18,32.874,rs1292299,0.029  
18,32.931,rs4797398,0.028  
18,32.957,rs653360,0.034  
18,33.040,rs2868929,0.055  
18,33.096,rs627953,0.070  
18,33.139,rs9957931,0.087  
18,33.141,rs11080389,0.087  
18,33.177,rs9949713,0.100  
18,33.212,rs8093795,0.105

18,33.234,rs9955237,0.109  
18,33.275,rs576084,0.099  
18,33.388,rs4797414,0.102  
18,33.402,rs12954327,0.083  
18,33.625,rs4796877,0.063  
18,33.633,rs8098645,0.061  
18,33.720,rs206491,0.057  
18,33.782,rs169570,0.068  
18,33.792,rs11080402,0.066  
18,33.820,rs206631,0.061  
18,33.833,rs4797430,0.063  
18,33.861,rs9949204,0.069  
18,33.878,rs206605,0.072  
18,33.918,rs9964529,0.081  
18,33.993,rs206581,0.090  
18,34.083,rs8091927,0.098  
18,34.123,rs206519,0.116  
18,34.144,rs206504,0.126  
18,34.172,rs206503,0.135  
18,34.176,rs206501,0.137  
18,34.201,rs12955584,0.164  
18,34.215,rs9959968,0.170  
18,34.248,rs8095782,0.185  
18,34.333,rs476792,0.208  
18,34.595,rs6505570,0.230  
18,34.601,rs16974882,0.231  
18,34.603,rs484583,0.231  
18,34.628,rs16974966,0.230  
18,34.645,rs475411,0.229  
18,34.958,rs539632,0.221  
18,34.969,rs480802,0.220  
18,34.977,rs655111,0.199  
18,34.999,rs8095590,0.257  
18,35.111,rs4796902,0.221  
18,35.254,rs7233628,0.209  
18,35.442,rs1918672,0.230  
18,35.465,rs1683369,0.241  
18,35.555,rs11875480,0.248  
18,35.822,rs264272,0.240  
18,35.906,rs9952954,0.255  
18,36.065,rs2660283,0.255  
18,36.172,rs11665509,0.247  
18,36.206,rs7235388,0.234  
18,36.241,rs2625381,0.225  
18,36.285,rs2870108,0.229  
18,36.287,rs12455924,0.228  
18,36.364,rs8091121,0.178  
18,36.388,rs2016302,0.179  
18,36.495,rs6505620,0.190  
18,36.592,rs4239294,0.190  
18,36.614,rs4506977,0.190  
18,36.631,rs4629032,0.193  
18,36.656,rs1542836,0.199  
18,36.779,rs4517857,0.179  
18,36.781,rs8097831,0.178  
18,36.830,rs4796915,0.147  
18,36.853,rs1498201,0.131  
18,36.941,rs7230244,0.107  
18,37.046,rs987890,0.110  
18,37.099,rs7243042,0.104  
18,37.163,rs461341,0.101

18,37.273,rs4797529,0.110  
18,37.349,rs11080515,0.087  
18,37.433,rs1893233,0.090  
18,37.794,rs507790,0.104  
18,37.863,rs2155678,0.111  
18,37.866,rs535529,0.112  
18,37.872,rs8099150,0.113  
18,37.883,rs1551900,0.114  
18,37.900,rs16976578,0.071  
18,37.904,rs8096857,0.067  
18,37.906,rs4541146,0.064  
18,37.919,rs12457181,0.061  
18,38.025,rs787554,0.062  
18,38.057,rs7239624,0.071  
18,38.060,rs662098,0.091  
18,38.066,rs641010,0.101  
18,38.076,rs593713,0.088  
18,38.117,rs871044,0.089  
18,38.198,rs622863,0.099  
18,38.242,rs679246,0.103  
18,38.276,rs647077,0.101  
18,38.302,rs7244678,0.109  
18,38.344,rs1020294,0.117  
18,38.547,rs4519391,0.115  
18,38.850,rs4796955,0.137  
18,38.953,rs11080567,0.134  
18,39.133,rs16973056,0.120  
18,39.557,rs1592643,0.087  
18,39.577,rs12959199,0.083  
18,39.613,rs2847254,0.075  
18,39.642,rs2542145,0.069  
18,39.685,rs478582,0.054  
18,39.707,rs9959061,0.051  
18,39.728,rs8083335,0.041  
18,39.730,rs9916926,0.043  
18,39.734,rs12953662,0.034  
18,39.737,rs12969041,0.031  
18,39.781,rs11662617,0.013  
18,39.801,rs4797757,0.013  
18,39.864,rs6505810,0.030  
18,39.891,rs12326878,0.068  
18,39.909,rs10502420,0.076  
18,39.919,rs4797774,0.064  
18,39.920,rs3859301,0.062  
18,39.925,rs7244136,0.057  
18,39.926,rs8089773,0.057  
18,39.926,rs8090201,0.057  
18,39.944,rs1785113,0.067  
18,39.945,rs12956044,0.067  
18,39.978,rs11876765,0.048  
18,39.984,rs1149360,0.044  
18,39.991,rs1284409,0.037  
18,39.992,rs1284410,0.036  
18,40.031,rs6505831,0.074  
18,40.034,rs12605886,0.076  
18,40.073,rs1149356,0.071  
18,40.153,rs9955264,0.071  
18,40.213,rs7236531,0.069  
18,40.225,rs948331,0.065  
18,40.229,rs16941288,0.065  
18,40.275,rs4797846,0.055

18,40.297,rs10502426,0.055  
18,40.328,rs7238647,0.055  
18,40.369,rs2286933,0.053  
18,40.488,rs16973565,0.045  
18,40.557,rs17705736,0.040  
18,40.557,rs3927214,0.040  
18,40.581,rs3971170,0.036  
18,40.605,rs6505891,0.030  
18,40.735,rs2870590,0.053  
18,40.828,rs9709947,0.059  
18,40.856,rs12964673,0.059  
18,43.705,rs8099122,0.087  
18,44.333,rs1893384,0.096  
18,44.406,rs12968949,0.104  
18,44.432,rs10163723,0.107  
18,44.555,rs4632227,0.132  
18,44.786,rs4800106,0.155  
18,44.817,rs11663716,0.156  
18,44.841,rs9963336,0.150  
18,44.918,rs10454095,0.136  
18,45.041,rs11876487,0.135  
18,45.100,rs1574006,0.132  
18,45.107,rs9967373,0.126  
18,45.129,rs8098563,0.107  
18,45.212,rs1893251,0.081  
18,45.213,rs12457136,0.080  
18,45.216,rs8093101,0.082  
18,45.229,rs4800402,0.093  
18,45.286,rs16967483,0.073  
18,45.298,rs472819,0.069  
18,45.412,rs4800131,0.053  
18,45.489,rs4404180,0.040  
18,46.037,rs1379805,0.041  
18,46.414,rs11874608,0.038  
18,46.452,rs11082304,0.038  
18,46.651,rs748717,0.034  
18,46.764,rs4800466,0.036  
18,47.278,rs4598991,0.046  
18,47.282,rs1788769,0.050  
18,48.026,rs2337235,0.036  
18,48.089,rs2011391,0.034  
18,48.119,rs8098360,0.031  
18,48.136,rs4043679,0.028  
18,48.213,rs3786418,0.024  
18,48.254,rs4800180,0.027  
18,48.261,rs10438983,0.027  
18,48.266,rs9962319,0.030  
18,48.273,rs716510,0.021  
18,48.322,rs11873350,0.009  
18,48.360,rs883597,0.003  
18,48.365,rs2848605,0.006  
18,48.387,rs1030110,0.007  
18,48.409,rs649632,0.009  
18,48.413,rs8085403,0.011  
18,48.500,rs543679,0.008  
18,48.519,rs553019,0.009  
18,48.540,rs9959859,0.005  
18,48.541,rs11875019,0.005  
18,48.548,rs1791520,0.004  
18,48.553,rs1945168,0.006  
18,48.559,rs12969149,0.008

18,48.561,rs1945148,0.009  
18,48.593,rs9304469,0.015  
18,48.627,rs339869,0.024  
18,48.885,rs1470743,0.043  
18,48.964,rs9304473,0.048  
18,49.024,rs2122791,0.063  
18,49.058,rs6508338,0.062  
18,49.117,rs1786153,0.077  
18,49.179,rs1668856,0.072  
18,49.194,rs6508340,0.087  
18,49.222,rs11876528,0.084  
18,49.308,rs9960691,0.088  
18,49.373,rs9963409,0.090  
18,49.446,rs6508347,0.076  
18,49.468,rs4129315,0.073  
18,49.488,rs4800205,0.071  
18,49.508,rs8086056,0.070  
18,49.591,rs8084638,0.070  
18,49.637,rs4131293,0.070  
18,49.698,rs4129657,0.072  
18,49.705,rs9947051,0.072  
18,49.821,rs12955466,0.067  
18,49.863,rs4550540,0.065  
18,49.882,rs4800629,0.065  
18,49.907,rs8083609,0.064  
18,49.913,rs12456829,0.064  
18,49.985,rs4800631,0.072  
18,49.989,rs11662932,0.073  
18,50.049,rs10853653,0.073  
18,50.169,rs16941505,0.062  
18,50.178,rs6508378,0.062  
18,50.328,rs273729,0.066  
18,50.448,rs1867745,0.069  
18,50.463,rs273773,0.069  
18,50.557,rs1840440,0.074  
18,50.597,rs873656,0.074  
18,50.840,rs12608228,0.085  
18,50.843,rs6508395,0.103  
18,50.935,rs12232738,0.101  
18,50.965,rs6508400,0.101  
18,51.038,rs559814,0.101  
18,51.101,rs9953448,0.101  
18,51.461,rs9959418,0.097  
18,51.503,rs3903163,0.114  
18,51.527,rs4340399,0.121  
18,51.538,rs8083585,0.103  
18,51.600,rs7243826,0.109  
18,51.643,rs496344,0.111  
18,51.654,rs2848993,0.111  
18,51.660,rs11083175,0.118  
18,51.674,rs9807159,0.138  
18,51.749,rs470268,0.219  
18,51.755,rs535796,0.229  
18,51.784,rs7233773,0.241  
18,51.791,rs11872394,0.234  
18,51.831,rs596015,0.224  
18,51.835,rs1017414,0.222  
18,51.858,rs9951307,0.228  
18,51.876,rs151245,0.257  
18,51.904,rs1030198,0.286  
18,51.932,rs163221,0.273



18,52.014,rs6508463,0.243  
18,52.040,rs4399617,0.229  
18,52.061,rs10502485,0.245  
18,52.062,rs1485817,0.244  
18,52.122,rs12956990,0.217  
18,52.166,rs9947302,0.206  
18,52.229,rs2247559,0.185  
18,52.275,rs7243573,0.205  
18,52.344,rs1519141,0.196  
18,52.422,rs939139,0.231  
18,52.449,rs16943693,0.229  
18,52.516,rs620844,0.223  
18,52.546,rs1008854,0.192  
18,52.564,rs7237914,0.189  
18,52.618,rs16943915,0.181  
18,52.619,rs1420942,0.181  
18,52.677,rs8097440,0.195  
18,52.873,rs8098920,0.210  
18,52.873,rs7232372,0.210  
18,52.903,rs9945664,0.213  
18,52.956,rs623234,0.187  
18,53.038,rs528438,0.178  
18,53.054,rs12454164,0.173  
18,53.093,rs11564339,0.162  
18,53.203,rs9964672,0.142  
18,53.260,rs8095086,0.141  
18,53.270,rs1464612,0.141  
18,53.310,rs11564364,0.141  
18,53.334,rs11083282,0.139  
18,53.433,rs2155791,0.096  
18,53.491,rs11083301,0.078  
18,53.664,rs11083322,0.101  
18,53.816,rs1515215,0.119  
18,53.867,rs983950,0.124  
18,53.901,rs8087422,0.119  
18,53.961,rs9949320,0.094  
18,53.997,rs16946751,0.099  
18,54.117,rs7241357,0.111  
18,54.204,rs4800925,0.104  
18,54.344,rs16947092,0.087  
18,54.363,rs1492817,0.085  
18,54.454,rs9630799,0.067  
18,54.539,rs16947335,0.058  
18,54.584,rs12965399,0.054  
18,54.616,rs9967020,0.055  
18,54.681,rs12608350,0.083  
18,54.695,rs16947786,0.085  
18,54.718,rs4499314,0.089  
18,54.755,rs10502549,0.094  
18,54.769,rs1348336,0.095  
18,54.778,rs7230529,0.097  
18,54.823,rs2542729,0.097  
18,54.837,rs2617921,0.097  
18,54.933,rs2850267,0.089  
18,54.960,rs3910337,0.084  
18,55.005,rs10502553,0.075  
18,55.015,rs1789041,0.065  
18,55.015,rs12185409,0.064  
18,55.020,rs1790690,0.059  
18,55.022,rs8765,0.059  
18,55.032,rs276910,0.069

18,55.050,rs1595350,0.094  
18,55.054,rs1126214,0.096  
18,55.059,rs1893963,0.096  
18,55.063,rs10084050,0.095  
18,55.069,rs1612474,0.098  
18,55.107,rs11081680,0.118  
18,55.114,rs1437606,0.118  
18,55.168,rs9952617,0.113  
18,55.186,rs8091003,0.096  
18,55.194,rs10502568,0.088  
18,55.211,rs17802140,0.090  
18,55.222,rs6506921,0.091  
18,55.236,rs724482,0.089  
18,55.248,rs8091481,0.085  
18,55.284,rs1791235,0.062  
18,55.293,rs9304102,0.057  
18,55.346,rs7240561,0.052  
18,55.351,rs10775449,0.051  
18,55.379,rs4799316,0.051  
18,55.400,rs10502578,0.053  
18,55.417,rs11873080,0.055  
18,55.569,rs9963048,0.075  
18,55.593,rs2009538,0.094  
18,55.610,rs6506955,0.096  
18,55.630,rs11662928,0.098  
18,55.683,rs168058,0.096  
18,55.737,rs12607965,0.113  
18,55.798,rs4799636,0.133  
18,55.807,rs7244700,0.136  
18,55.839,rs2241891,0.147  
18,55.872,rs16962901,0.160  
18,55.877,rs660959,0.159  
18,55.880,rs4462681,0.160  
18,56.238,rs11662813,0.243  
18,56.728,rs4630625,0.260  
18,56.840,rs8090097,0.273  
18,56.972,rs4799358,0.295  
18,57.097,rs6650640,0.305  
18,57.109,rs9952705,0.305  
18,57.128,rs12966991,0.301  
18,57.196,rs4799751,0.280  
18,57.310,rs1521788,0.317  
18,57.349,rs8092794,0.363  
18,57.371,rs2509595,0.368  
18,57.466,rs8089375,0.377  
18,57.576,rs1383290,0.373  
18,57.613,rs17668591,0.370  
18,57.676,rs2288085,0.339  
18,57.688,rs10502637,0.334  
18,57.745,rs680798,0.331  
18,57.781,rs8086062,0.285  
18,57.784,rs355315,0.282  
18,57.878,rs3786394,0.260  
18,57.960,rs17646987,0.250  
18,58.047,rs8095692,0.252  
18,58.396,rs3786391,0.263  
18,58.429,rs1006388,0.264  
18,58.435,rs16967040,0.264  
18,59.175,rs1789529,0.286  
18,59.197,rs1540043,0.313  
18,59.294,rs623053,0.313

18,59.298,rs579596,0.312  
18,59.310,rs16967576,0.310  
18,59.319,rs2848584,0.242  
18,59.358,rs3786276,0.233  
18,59.358,rs598246,0.233  
18,59.364,rs3786278,0.229  
18,59.365,rs12454634,0.229  
18,59.374,rs12604338,0.230  
18,59.397,rs4799863,0.229  
18,59.457,rs16967780,0.213  
18,59.481,rs9955084,0.208  
18,59.503,rs2000661,0.206  
18,59.542,rs1790649,0.210  
18,59.590,rs17650811,0.207  
18,59.625,rs7236364,0.205  
18,59.636,rs7242523,0.206  
18,59.645,rs4799421,0.205  
18,59.692,rs12956471,0.189  
18,59.710,rs8091163,0.173  
18,59.711,rs4799869,0.173  
18,59.714,rs16967993,0.172  
18,59.714,rs12104044,0.172  
18,59.725,rs685435,0.171  
18,59.843,rs669086,0.182  
18,59.944,rs9965261,0.169  
18,59.968,rs9948912,0.163  
18,59.969,rs1786068,0.163  
18,59.975,rs3865390,0.178  
18,59.977,rs3889769,0.178  
18,59.987,rs1786818,0.178  
18,59.989,rs2187048,0.177  
18,59.990,rs1954869,0.177  
18,59.993,rs1893371,0.173  
18,59.994,rs1786802,0.178  
18,59.995,rs17750345,0.207  
18,59.995,rs1786798,0.223  
18,59.999,rs9954961,0.217  
18,60.009,rs7233417,0.168  
18,60.020,rs1187252,0.148  
18,60.036,rs9954636,0.144  
18,60.041,rs8093306,0.143  
18,60.053,rs8095525,0.151  
18,60.087,rs16969659,0.146  
18,60.151,rs9946516,0.136  
18,60.230,rs7226938,0.151  
18,60.309,rs1511934,0.168  
18,60.358,rs977952,0.181  
18,60.468,rs1196939,0.178  
18,60.471,rs1511939,0.177  
18,60.505,rs1511937,0.176  
18,60.559,rs1944386,0.173  
18,60.560,rs11665446,0.173  
18,60.588,rs9284421,0.199  
18,60.641,rs1365461,0.222  
18,60.716,rs1943413,0.238  
18,60.761,rs7236042,0.252  
18,60.784,rs4476248,0.264  
18,60.830,rs10502714,0.272  
18,61.161,rs7235733,0.333  
18,61.252,rs12964741,0.344  
18,61.288,rs2276209,0.359

18,61.309,rs2589035,0.368  
18,61.360,rs1613104,0.387  
18,61.501,rs1355829,0.346  
18,61.536,rs7236890,0.349  
18,61.706,rs752216,0.358  
18,61.748,rs7236979,0.403  
18,61.759,rs4799285,0.399  
18,61.981,rs4254390,0.477  
18,62.120,rs4132081,0.474  
18,62.260,rs10502739,0.451  
18,62.368,rs9959057,0.433  
18,62.387,rs4890390,0.433  
18,62.395,rs10502750,0.433  
18,62.400,rs4633807,0.434  
18,62.434,rs1941593,0.454  
18,62.465,rs11877111,0.476  
18,62.626,rs2612332,0.461  
18,62.686,rs964274,0.424  
18,62.711,rs16975208,0.415  
18,62.739,rs2082586,0.421  
18,62.764,rs1025443,0.429  
18,62.779,rs3898586,0.438  
18,62.800,rs1432145,0.374  
18,62.810,rs7238810,0.365  
18,63.217,rs482553,0.406  
18,63.220,rs525776,0.406  
18,63.232,rs6507465,0.406  
18,63.241,rs17610383,0.395  
18,63.262,rs11082277,0.368  
18,63.280,rs12605243,0.347  
18,63.282,rs655464,0.342  
18,63.282,rs613691,0.308  
18,63.289,rs1158604,0.316  
18,63.300,rs618236,0.326  
18,63.340,rs8089316,0.296  
18,63.357,rs598839,0.284  
18,63.515,rs7504768,0.238  
18,63.609,rs8096948,0.242  
18,63.636,rs17717437,0.244  
18,64.093,rs1157964,0.268  
18,64.157,rs1527436,0.269  
18,64.195,rs2622796,0.270  
18,64.235,rs8084855,0.233  
18,64.256,rs4144407,0.231  
18,64.448,rs6507544,0.262  
18,64.482,rs4145182,0.263  
18,64.623,rs1460521,0.260  
18,64.668,rs1460509,0.264  
18,64.744,rs1841389,0.269  
18,64.924,rs8087931,0.266  
18,65.194,rs1400390,0.272  
18,65.281,rs717139,0.276  
18,65.431,rs1456614,0.252  
18,65.780,rs7237741,0.218  
18,65.834,rs2126334,0.217  
18,65.876,rs7238082,0.217  
18,65.922,rs12958322,0.214  
18,65.998,rs11665106,0.212  
18,66.024,rs1004945,0.212  
18,66.103,rs10468972,0.212  
18,66.174,rs616444,0.212

18,66.216,rs8090594,0.212  
18,66.245,rs9783858,0.207  
18,66.324,rs10502850,0.222  
18,66.348,rs12454061,0.223  
18,66.349,rs11872951,0.223  
18,66.366,rs4890506,0.222  
18,66.565,rs7240958,0.242  
18,66.569,rs4890535,0.243  
18,66.680,rs8095304,0.266  
18,66.853,rs2255757,0.312  
18,66.864,rs2014869,0.310  
18,66.924,rs8086752,0.269  
18,66.959,rs6507618,0.271  
18,67.049,rs2705388,0.281  
18,67.125,rs10775478,0.293  
18,67.179,rs1484873,0.291  
18,67.204,rs1552325,0.290  
18,67.232,rs8088466,0.255  
18,67.253,rs7227456,0.252  
18,67.291,rs16978461,0.247  
18,67.298,rs1893792,0.246  
18,67.298,rs3760578,0.246  
18,67.539,rs3744998,0.221  
18,67.635,rs10048241,0.236  
18,67.683,rs10853539,0.242  
18,67.839,rs9807399,0.246  
18,68.246,rs17758320,0.212  
18,68.342,rs4890637,0.200  
18,68.348,rs754858,0.199  
18,68.406,rs11082521,0.186  
18,68.466,rs2364835,0.166  
18,68.486,rs9962113,0.168  
18,68.499,rs7242055,0.169  
18,68.574,rs3911131,0.161  
18,68.625,rs7232954,0.144  
18,68.785,rs10468983,0.152  
18,68.829,rs1868711,0.161  
18,68.854,rs11661050,0.166  
18,68.856,rs732108,0.166  
18,68.875,rs16978577,0.162  
18,68.909,rs1078174,0.139  
18,68.924,rs12956914,0.140  
18,69.670,rs2010834,0.198  
18,70.048,rs7231801,0.190  
18,70.062,rs1347340,0.190  
18,70.210,rs1893786,0.190  
18,70.217,rs12956050,0.190  
18,70.281,rs2004310,0.150  
18,70.380,rs8090717,0.110  
18,70.407,rs2136619,0.103  
18,70.437,rs17798773,0.116  
18,70.453,rs9635893,0.120  
18,70.468,rs3968537,0.124  
18,70.602,rs9958551,0.119  
18,70.627,rs2938033,0.116  
18,70.681,rs2852950,0.106  
18,70.824,rs1792670,0.091  
18,70.918,rs4940140,0.074  
18,70.968,rs11660291,0.072  
18,70.974,rs7236709,0.072  
18,70.998,rs7242462,0.070

18,71.003,rs8099076,0.069  
18,71.014,rs4313606,0.067  
18,71.024,rs4939701,0.065  
18,71.072,rs4939719,0.061  
18,71.086,rs4445959,0.061  
18,71.086,rs4564645,0.061  
18,71.113,rs4940257,0.078  
18,71.135,rs7230288,0.111  
18,71.174,rs11663191,0.113  
18,71.208,rs1893948,0.115  
18,71.219,rs1124349,0.142  
18,71.239,rs2156650,0.144  
18,71.260,rs8084060,0.147  
18,71.264,rs1113629,0.148  
18,71.306,rs1944586,0.167  
18,71.332,rs10451390,0.157  
18,71.376,rs4940352,0.145  
18,71.399,rs952602,0.162  
18,71.410,rs2187430,0.174  
18,71.419,rs9947735,0.178  
18,71.428,rs9953229,0.158  
18,71.462,rs4258691,0.193  
18,71.482,rs8087061,0.189  
18,71.511,rs4591213,0.176  
18,71.673,rs12607412,0.199  
18,71.759,rs4939551,0.205  
18,71.796,rs11082688,0.207  
18,71.838,rs8085434,0.208  
18,71.846,rs299734,0.206  
18,71.862,rs6507861,0.210  
18,71.877,rs10502895,0.200  
18,71.910,rs12604748,0.131  
18,71.917,rs4583322,0.101  
18,71.957,rs3764481,0.115  
18,71.964,rs11082704,0.116  
18,71.972,rs11082705,0.117  
18,72.024,rs937021,0.116  
18,72.043,rs7240004,0.113  
18,72.132,rs17186485,0.069  
18,72.140,rs4939827,0.066  
18,72.154,rs7238442,0.065  
18,72.160,rs4939832,0.065  
18,72.175,rs3736242,0.062  
18,72.261,rs2878901,0.041  
18,72.264,rs698611,0.056  
18,72.283,rs1288813,0.074  
18,72.294,rs357887,0.114  
18,72.451,rs8097746,0.080  
18,72.499,rs1838962,0.076  
18,72.946,rs7242374,0.098  
18,73.010,rs2097055,0.092  
18,73.073,rs11664342,0.087  
18,73.077,rs7235005,0.087  
18,73.118,rs1943969,0.089  
18,73.146,rs11875988,0.090  
18,73.254,rs1787531,0.098  
18,73.364,rs1942418,0.100  
18,73.456,rs1787328,0.101  
18,73.456,rs11663056,0.101  
18,73.458,rs1790786,0.102  
18,73.531,rs7240708,0.139

18,73.547,rs9304393,0.148  
18,73.766,rs1355410,0.139  
18,73.791,rs8091012,0.140  
18,73.819,rs4939622,0.138  
18,73.891,rs2276366,0.132  
18,73.900,rs9961704,0.131  
18,73.927,rs4939627,0.129  
18,74.135,rs2119547,0.134  
18,74.393,rs11082830,0.189  
18,74.459,rs930362,0.200  
18,74.486,rs893315,0.203  
18,74.604,rs1893490,0.193  
18,74.638,rs12961853,0.177  
18,74.680,rs9948424,0.131  
18,74.696,rs3752088,0.072  
18,74.700,rs7240429,0.059  
18,74.704,rs11877439,0.040  
18,74.707,rs2276186,0.029  
18,74.707,rs17742992,0.032  
18,74.707,rs2586776,0.035  
18,74.709,rs7230138,0.018  
18,74.710,rs2847579,0.011  
18,74.729,rs654136,0.011  
18,74.736,rs10163789,0.010  
18,74.777,rs948552,0.006  
18,74.783,rs2282543,0.006  
18,74.799,rs16952971,0.006  
18,74.811,rs7232265,0.002  
18,74.829,rs6508066,0.002  
18,74.849,rs321857,0.001  
18,74.855,rs8089159,0.004  
18,74.859,rs1369766,0.006  
18,74.938,rs1893409,0.029  
18,74.943,rs12606811,0.034  
18,74.950,rs322548,0.041  
18,74.987,rs322512,0.037  
18,75.062,rs52677,0.029  
18,75.069,rs9949310,0.029  
18,75.203,rs2928945,0.025  
18,75.225,rs2928953,0.025  
18,75.227,rs1480925,0.025  
18,75.247,rs9304414,0.024  
18,75.254,rs7240111,0.024  
18,75.293,rs9948203,0.024  
18,75.363,rs9807432,0.021  
18,75.412,rs7232159,0.017  
18,75.447,rs1445093,0.013  
18,75.478,rs3902020,0.018  
18,75.491,rs698619,0.018  
18,75.518,rs919635,0.016  
18,75.533,rs1443568,0.017  
18,75.562,rs11877840,0.022  
18,75.569,rs12456286,0.023  
18,75.591,rs17816780,0.025  
18,75.630,rs12457422,0.028  
18,75.640,rs2168159,0.029  
18,75.643,rs1144050,0.029  
18,75.661,rs1975750,0.031  
18,75.687,rs1143768,0.034  
18,75.708,rs2219556,0.040  
18,75.714,rs12606567,0.032

18,75.716,rs1675225,0.030  
18,75.758,rs16955409,0.030  
18,75.817,rs4939705,0.030  
18,75.831,rs727514,0.030  
18,75.944,rs4940235,0.017  
18,76.055,rs6508210,0.011  
18,76.114,rs8097413,0.008  
18,76.233,rs2270954,0.004  
18,76.280,rs9966535,0.002  
18,76.359,rs9304452,0.000  
18,76.466,rs1553108,-0.000  
18,76.467,rs1995138,-0.000  
18,76.752,rs527544,-0.014  
18,76.877,rs1657880,-0.017  
18,77.480,rs4800967,-0.040  
18,77.543,rs11152150,-0.042  
18,77.547,rs9955009,-0.055  
18,77.550,rs11661089,-0.055  
18,77.553,rs949029,-0.056  
18,77.557,rs4309482,-0.066  
18,77.560,rs9963853,-0.071  
18,77.579,rs4800985,-0.050  
18,77.607,rs1261082,-0.042  
18,77.784,rs1440475,-0.036  
18,77.787,rs10515970,-0.036  
18,78.336,rs12457157,-0.024  
18,78.524,rs784254,-0.030  
18,78.839,rs1506633,-0.021  
18,78.907,rs2588477,-0.020  
18,78.956,rs10048306,-0.020  
18,79.092,rs2535726,-0.009  
18,79.112,rs2588482,-0.007  
18,79.158,rs1789564,-0.007  
18,79.195,rs1792746,-0.005  
18,79.201,rs1789588,-0.005  
18,79.298,rs713242,-0.005  
18,79.302,rs917712,-0.005  
18,79.332,rs12455011,-0.006  
18,79.367,rs2538025,-0.006  
18,79.415,rs2010962,-0.006  
18,79.692,rs1506647,-0.000  
18,79.791,rs625628,0.000  
18,80.108,rs9947297,0.000  
18,80.113,rs4801054,0.000  
18,80.185,rs1421264,0.000  
18,80.346,rs9945880,0.000  
18,80.471,rs1657421,0.000  
18,80.518,rs722092,0.000  
18,80.605,rs4800960,0.000  
18,80.614,rs1942336,0.000  
18,80.667,rs1943387,-0.000  
18,80.738,rs990729,-0.000  
18,80.770,rs1942965,0.000  
18,80.771,rs2074320,0.000  
18,80.798,rs1234635,0.000  
18,80.836,rs1217562,0.001  
18,80.907,rs4940406,0.000  
18,81.094,rs644016,-0.001  
18,81.252,rs515897,-0.001  
18,81.266,rs663774,-0.001  
18,81.317,rs2269222,-0.001



18,81.361,rs492274,-0.002  
18,81.405,rs11356,-0.002  
18,81.547,rs17832328,-0.001  
18,81.634,rs319448,-0.001  
18,81.760,rs17064003,-0.001  
18,81.808,rs12961881,-0.001  
18,81.844,rs7239484,-0.001  
18,81.858,rs2663842,-0.000  
18,81.863,rs12960272,-0.000  
18,81.889,rs2571225,-0.000  
18,81.947,rs2571232,0.000  
18,82.011,rs17692241,0.000  
18,82.025,rs8094024,0.000  
18,82.133,rs4121751,0.000  
18,82.202,rs7240052,0.000  
18,82.215,rs4940582,0.001  
18,82.389,rs12456113,0.007  
18,82.391,rs12968095,0.003  
18,82.474,rs9953073,0.004  
18,82.524,rs4528665,0.004  
18,82.665,rs12967469,0.010  
18,82.693,rs500733,0.012  
18,82.701,rs17064378,0.012  
18,82.703,rs4940643,0.012  
18,82.762,rs549476,0.010  
18,82.763,rs878396,0.010  
18,82.799,rs9957844,0.010  
18,83.010,rs158857,0.000  
18,83.199,rs4941388,0.000  
18,83.225,rs4058287,0.001  
18,83.584,rs4369757,0.001  
18,83.610,rs3744866,0.002  
18,83.668,rs7240339,0.002  
18,83.750,rs12103986,0.002  
18,83.770,rs11152081,0.003  
18,83.806,rs7238217,0.005  
18,83.837,rs11152086,0.006  
18,83.966,rs9944639,0.007  
18,84.003,rs11873676,0.007  
18,84.127,rs9964749,0.009  
18,84.374,rs12454711,0.014  
18,84.534,rs7507051,0.020  
18,84.653,rs11152103,0.028  
18,84.859,rs3826597,0.046  
18,84.947,rs4940787,0.051  
18,84.980,rs7226455,0.034  
18,84.987,rs755719,0.032  
18,85.031,rs1543159,0.032  
18,85.070,rs3744893,0.039  
18,85.081,rs645492,0.042  
18,85.115,rs561894,0.031  
18,85.494,rs4629079,0.052  
18,85.495,rs7241697,0.054  
18,85.498,rs7228727,0.070  
18,85.508,rs585632,0.046  
18,85.582,rs599680,0.050  
18,85.656,rs8096073,0.033  
18,85.686,rs10503029,0.030  
18,85.751,rs3133206,0.009  
18,85.919,rs12606960,0.007  
18,85.923,rs12970058,0.007

18,85.967,rs1652069,0.009  
18,85.993,rs7244658,0.010  
18,86.003,rs3097407,0.010  
18,86.017,rs1791316,0.018  
18,86.020,rs10163697,0.018  
18,86.074,rs17781327,0.016  
18,86.106,rs1791350,0.013  
18,86.117,rs1788841,0.014  
18,86.154,rs4940906,0.014  
18,86.189,rs8084711,0.011  
18,86.234,rs12456032,0.002  
18,86.258,rs11152187,0.002  
18,86.286,rs7240884,0.002  
18,86.313,rs9319956,0.006  
18,86.368,rs7227333,-0.000  
18,86.377,rs8098717,-0.001  
18,86.439,rs768456,-0.003  
18,86.446,rs7238778,-0.003  
18,86.447,rs9958194,-0.003  
18,86.519,rs1893512,-0.004  
18,86.595,rs9954571,-0.006  
18,86.674,rs9946888,-0.006  
18,86.787,rs11872992,-0.004  
18,86.812,rs8083721,-0.004  
18,86.842,rs11661166,-0.003  
18,86.868,rs1943242,-0.005  
18,86.932,rs585187,-0.002  
18,86.968,rs12960864,-0.001  
18,86.984,rs11152238,-0.000  
18,86.990,rs8088802,-0.000  
18,87.044,rs7229783,-0.000  
18,87.319,rs12454816,-0.000  
18,87.334,rs17067559,-0.000  
18,87.374,rs2332079,-0.001  
18,87.607,rs154931,-0.001  
18,87.624,rs154916,0.000  
18,87.712,rs950408,0.000  
18,87.748,rs8086807,0.001  
18,87.799,rs7231989,0.000  
18,87.807,rs1495805,-0.000  
18,87.832,rs1908593,-0.000  
18,87.850,rs17068252,0.000  
18,87.862,rs9954337,0.000  
18,87.867,rs10871791,0.000  
18,87.889,rs2159595,0.002  
18,87.907,rs929525,0.005  
18,87.928,rs17748357,0.006  
18,87.962,rs2535357,0.008  
18,87.991,rs12964819,0.005  
18,87.995,rs1943334,0.005  
18,87.997,rs2051346,0.003  
18,88.000,rs1943329,0.001  
18,88.039,rs7239572,0.000  
18,88.061,rs17068541,-0.000  
18,88.124,rs9962500,-0.000  
18,88.185,rs17068758,-0.001  
18,88.281,rs4941050,-0.000  
18,88.285,rs4490091,-0.000  
18,88.294,rs2282651,-0.000  
18,88.296,rs4941051,-0.000  
18,88.303,rs4941055,0.001

18,88.330,rs9959847,0.000  
18,88.407,rs8085961,0.000  
18,88.430,rs9807754,0.000  
18,88.497,rs7232902,0.000  
18,88.531,rs8096507,0.000  
18,88.710,rs1788070,0.000  
18,88.715,rs17069203,0.000  
18,88.796,rs930171,0.001  
18,89.085,rs9948708,0.003  
18,89.229,rs9951012,0.005  
18,89.232,rs1805034,0.005  
18,89.262,rs2957128,0.004  
18,89.277,rs2957146,0.005  
18,89.291,rs8094440,0.008  
18,89.311,rs948758,0.007  
18,89.319,rs10503071,0.007  
18,89.350,rs7238925,0.006  
18,89.394,rs17070072,0.004  
18,89.397,rs8091832,0.004  
18,89.437,rs1052315,0.005  
18,89.453,rs2105728,0.006  
18,89.459,rs4940563,0.005  
18,89.480,rs9946161,0.005  
18,89.617,rs595146,0.002  
18,89.690,rs541425,0.003  
18,89.743,rs17746008,0.003  
18,90.085,rs4941171,0.003  
18,90.122,rs7242360,0.003  
18,90.147,rs9949366,0.002  
18,90.239,rs6567313,0.002  
18,90.552,rs7230761,0.019  
18,90.557,rs4987853,0.018  
18,90.557,rs4987852,0.018  
18,90.563,rs4456611,0.018  
18,90.573,rs17070798,0.041  
18,90.574,rs6567328,0.049  
18,90.574,rs12454712,0.052  
18,90.576,rs1481031,0.058  
18,90.586,rs720321,0.056  
18,90.594,rs8083946,0.064  
18,90.596,rs11872329,0.062  
18,90.603,rs3927911,0.056  
18,90.608,rs8096471,0.045  
18,90.611,rs1381548,0.039  
18,90.614,rs2850761,0.038  
18,90.634,rs489520,0.046  
18,90.640,rs9946122,0.047  
18,90.640,rs9807674,0.047  
18,90.752,rs4560010,0.040  
18,90.794,rs10163809,0.033  
18,90.853,rs2271253,0.036  
18,90.892,rs1455555,0.038  
18,90.900,rs9961311,0.039  
18,90.957,rs10503081,0.041  
18,91.029,rs17698252,0.043  
18,91.042,rs755163,0.043  
18,91.278,rs3853683,0.045  
18,91.385,rs6567383,0.047  
18,91.461,rs7245010,0.042  
18,91.550,rs1720853,0.039  
18,91.655,rs1701603,0.040

18,91.883,rs8097425,0.029  
18,92.036,rs2162352,0.045  
18,92.113,rs1460967,0.033  
18,92.411,rs4941246,0.071  
18,92.459,rs17072617,0.086  
18,92.462,rs957789,0.087  
18,92.518,rs9676116,0.093  
18,92.524,rs4292016,0.093  
18,92.564,rs8086559,0.089  
18,92.614,rs1019433,0.091  
18,92.641,rs10515993,0.092  
18,92.650,rs12960757,0.101  
18,92.661,rs2959470,0.114  
18,92.691,rs8094758,0.101  
18,92.708,rs7235285,0.097  
18,92.710,rs9320046,0.097  
18,92.733,rs4346287,0.095  
18,92.762,rs1506232,0.114  
18,92.774,rs7239193,0.124  
18,92.833,rs1035208,0.157  
18,92.861,rs637644,0.152  
18,92.896,rs1587962,0.188  
18,92.899,rs11151195,0.186  
18,92.909,rs470497,0.179  
18,92.928,rs565973,0.220  
18,92.939,rs610091,0.301  
18,92.961,rs12965811,0.300  
18,92.969,rs4941343,0.300  
18,93.001,rs17074993,0.301  
18,93.032,rs7229020,0.302  
18,93.711,rs2587416,0.365  
18,93.724,rs2541868,0.365  
18,93.752,rs7231837,0.360  
18,93.870,rs2706586,0.339  
18,94.375,rs8097107,0.347  
18,94.425,rs8097294,0.351  
18,94.540,rs4510132,0.359  
18,94.556,rs10782022,0.360  
18,94.722,rs1787502,0.370  
18,94.873,rs2040212,0.378  
18,94.874,rs12458066,0.378  
18,94.874,rs17810856,0.378  
18,95.226,rs12606152,0.382  
18,95.294,rs10516001,0.382  
18,95.483,rs2114507,0.384  
18,95.504,rs9949630,0.383  
18,95.579,rs12957557,0.377  
18,95.580,rs2156439,0.377  
18,95.606,rs7240637,0.348  
18,95.611,rs4494651,0.347  
18,95.627,rs4281825,0.364  
18,95.639,rs7228283,0.381  
18,95.693,rs8085939,0.403  
18,95.907,rs4891598,0.422  
18,95.999,rs8099213,0.412  
18,96.061,rs9319727,0.397  
18,96.096,rs17077145,0.389  
18,96.097,rs2124349,0.389  
18,96.112,rs4510133,0.388  
18,96.133,rs11877044,0.372  
18,96.157,rs7244686,0.355

18,96.215,rs2279269,0.374  
18,96.266,rs436463,0.372  
18,96.268,rs395393,0.370  
18,96.294,rs875922,0.361  
18,96.295,rs894910,0.361  
18,96.301,rs17077611,0.318  
18,96.497,rs4127445,0.295  
18,97.087,rs654875,0.290  
18,97.376,rs8084950,0.272  
18,97.766,rs8096215,0.235  
18,97.785,rs13381776,0.228  
18,97.801,rs1016443,0.223  
18,97.885,rs17078587,0.190  
18,97.889,rs17078595,0.206  
18,97.892,rs596045,0.223  
18,97.893,rs582576,0.283  
18,97.894,rs7504149,0.255  
18,97.907,rs8084412,0.269  
18,97.934,rs6566351,0.239  
18,97.945,rs683011,0.221  
18,97.965,rs645257,0.177  
18,97.966,rs593418,0.176  
18,97.987,rs17802226,0.177  
18,98.078,rs481796,0.167  
18,98.098,rs1400402,0.148  
18,98.121,rs3897843,0.136  
18,98.153,rs2319554,0.113  
18,98.166,rs7229736,0.089  
18,98.167,rs1547548,0.072  
18,98.211,rs979317,0.056  
18,98.309,rs309251,0.034  
18,98.319,rs17079623,0.032  
18,98.322,rs2048329,0.031  
18,98.359,rs677592,0.028  
18,98.395,rs590974,0.026  
18,98.434,rs1942295,0.030  
18,98.467,rs1986337,0.030  
18,98.481,rs10445526,0.029  
18,98.586,rs11873439,0.018  
18,98.612,rs3891810,0.016  
18,98.665,rs495236,0.014  
18,98.691,rs547660,0.015  
18,98.694,rs1472870,0.016  
18,98.716,rs10513958,0.015  
18,98.754,rs1354966,0.012  
18,98.779,rs4359550,0.020  
18,98.797,rs1532662,0.019  
18,98.817,rs1354065,0.019  
18,98.913,rs2034021,0.021  
18,98.923,rs8083908,0.020  
18,98.963,rs8087067,0.022  
18,98.971,rs4491635,0.023  
18,98.983,rs1442671,0.024  
18,98.995,rs10513965,0.023  
18,99.073,rs11151513,0.017  
18,99.130,rs11151522,0.020  
18,99.209,rs1961994,0.019  
18,99.254,rs4494649,0.020  
18,99.280,rs17062094,0.017  
18,99.303,rs882114,0.014  
18,99.311,rs12104016,0.013

18,99.337,rs8086400,0.011  
18,99.414,rs1788103,0.013  
18,99.456,rs1788112,0.012  
18,99.459,rs1788245,0.011  
18,99.549,rs1539964,0.009  
18,99.921,rs4891821,0.007  
18,100.003,rs283258,0.007  
18,100.011,rs2628269,0.007  
18,100.090,rs7230661,0.006  
18,100.143,rs1484735,0.010  
18,100.180,rs7234673,0.012  
18,100.189,rs7244215,0.013  
18,100.190,rs1992344,0.012  
18,100.198,rs3943675,0.007  
18,100.210,rs2581690,0.009  
18,100.227,rs2366188,0.010  
18,100.242,rs2581720,0.011  
18,100.251,rs10513985,0.010  
18,100.269,rs10513984,0.007  
18,100.283,rs10871668,0.005  
18,100.291,rs9953114,0.004  
18,100.350,rs7239026,0.002  
18,100.383,rs1922109,0.001  
18,100.762,rs12967006,-0.004  
18,101.228,rs1529210,-0.003  
18,101.464,rs1282706,-0.001  
18,101.545,rs1395849,-0.001  
18,101.819,rs2698158,-0.001  
18,102.081,rs7235962,-0.004  
18,102.105,rs2226737,-0.004  
18,102.169,rs1942196,-0.004  
18,102.350,rs2156025,-0.003  
18,102.503,rs9956054,-0.003  
18,102.601,rs12605863,-0.004  
18,102.622,rs716863,-0.004  
18,102.674,rs1942161,-0.005  
18,103.195,rs996919,-0.028  
18,103.230,rs17084114,-0.039  
18,103.237,rs2000840,-0.054  
18,103.390,rs17219377,-0.066  
18,103.422,rs1539909,-0.071  
18,103.497,rs8090683,-0.089  
18,103.602,rs4600562,-0.085  
18,103.609,rs4891443,-0.088  
18,103.648,rs948665,-0.125  
18,103.669,rs11151691,-0.128  
18,103.699,rs1505749,-0.128  
18,103.725,rs2135271,-0.136  
18,103.756,rs868812,-0.144  
18,103.769,rs7227772,-0.142  
18,103.854,rs17085106,-0.147  
18,104.046,rs10514025,-0.158  
18,104.139,rs2685441,-0.163  
18,104.435,rs4330010,-0.201  
18,104.710,rs10514031,-0.240  
18,104.720,rs11151721,-0.240  
18,104.972,rs12326317,-0.233  
18,105.244,rs8092744,-0.225  
18,105.904,rs4268850,-0.211  
18,106.009,rs7242135,-0.193  
18,106.129,rs4572503,-0.171

18,106.443,rs7236872,-0.128  
18,106.541,rs9959846,-0.118  
18,106.882,rs8090911,-0.091  
18,107.047,rs12605412,-0.070  
18,107.058,rs12956651,-0.070  
18,107.242,rs7228776,-0.067  
18,107.710,rs11661663,-0.069  
18,108.026,rs6566644,-0.060  
18,108.166,rs7236585,-0.051  
18,108.631,rs4316844,-0.075  
18,108.693,rs1943823,-0.081  
18,108.719,rs2187366,-0.083  
18,108.874,rs8094247,-0.107  
18,108.888,rs17087309,-0.107  
18,109.195,rs1113683,-0.121  
18,109.351,rs4555235,-0.126  
18,109.591,rs11873008,-0.135  
18,109.784,rs1981375,-0.149  
18,110.049,rs7240777,-0.154  
18,110.367,rs1942771,-0.122  
18,110.419,rs17087818,-0.116  
18,110.443,rs12967668,-0.118  
18,110.546,rs12958280,-0.109  
18,110.591,rs9950388,-0.109  
18,110.601,rs4563123,-0.110  
18,110.636,rs1943885,-0.118  
18,110.670,rs17088148,-0.142  
18,110.697,rs11875698,-0.162  
18,110.728,rs7243786,-0.196  
18,110.734,rs12955729,-0.192  
18,110.742,rs1430532,-0.209  
18,110.745,rs11872509,-0.213  
18,110.766,rs4891524,-0.185  
18,110.776,rs4892142,-0.185  
18,110.779,rs1367345,-0.187  
18,110.784,rs12954871,-0.187  
18,110.790,rs751224,-0.187  
18,110.796,rs7227420,-0.213  
18,110.797,rs9319887,-0.217  
18,110.799,rs1560433,-0.225  
18,110.805,rs8086918,-0.213  
18,110.827,rs1560430,-0.272  
18,110.884,rs4891530,-0.309  
18,110.942,rs8086628,-0.337  
18,110.967,rs2850526,-0.342  
18,111.004,rs2850531,-0.326  
18,111.016,rs8090208,-0.328  
18,111.034,rs17088617,-0.333  
18,111.082,rs2850492,-0.398  
18,111.279,rs9945428,-0.458  
18,111.364,rs12605204,-0.450  
18,111.370,rs1788645,-0.450  
18,111.452,rs11151935,-0.441  
18,111.474,rs9319895,-0.391  
18,111.481,rs9948558,-0.395  
18,111.482,rs7233554,-0.395  
18,111.531,rs1788625,-0.417  
18,111.690,rs12965832,-0.488  
18,111.737,rs2096949,-0.522  
18,111.764,rs17807682,-0.533  
18,111.778,rs1149882,-0.561

18,111.801,rs9955537,-0.596  
18,111.825,rs4892210,-0.597  
18,111.850,rs2278155,-0.618  
18,111.867,rs1991277,-0.646  
18,111.884,rs2162256,-0.658  
18,111.966,rs17089353,-0.766  
18,111.979,rs3794954,-0.782  
18,112.104,rs12964208,-0.807  
18,112.188,rs9967490,-0.709  
18,112.211,rs12960862,-0.700  
18,112.240,rs7506929,-0.697  
18,112.288,rs2887,-0.685  
18,113.900,rs1863417,-0.824  
18,114.436,rs2120144,-0.891  
18,114.650,rs7359804,-0.873  
18,114.710,rs906517,-0.897  
18,114.857,rs8083466,-0.928  
18,114.883,rs4891233,-0.939  
18,114.956,rs1828098,-0.977  
18,114.995,rs9957684,-0.967  
18,115.049,rs7231415,-0.953  
18,115.167,rs629126,-0.893  
18,116.306,rs4316840,-1.002  
18,116.486,rs2584295,-1.143  
18,116.491,rs2212841,-1.148  
18,116.514,rs997800,-1.161  
18,116.531,rs4891084,-1.164  
18,116.620,rs1943200,-1.244  
18,116.641,rs11150909,-1.263  
18,116.655,rs17058081,-1.269  
18,116.686,rs1380711,-1.282  
18,116.691,rs8089562,-1.272  
18,116.713,rs9956878,-1.125  
18,116.750,rs12454238,-1.056  
18,116.760,rs7241677,-1.065  
18,116.784,rs8087536,-1.126  
18,116.820,rs898491,-1.141  
18,116.887,rs1507465,-1.156  
18,116.922,rs2405937,-1.270  
18,117.046,rs359775,-1.282  
18,117.112,rs7237886,-1.249  
18,117.159,rs359724,-1.234  
18,117.162,rs181698,-1.233  
18,117.214,rs12958111,-1.294  
18,117.216,rs1030567,-1.293  
18,117.398,rs8094564,-1.328  
18,117.677,rs2554840,-1.342  
18,117.798,rs11150946,-1.191  
18,117.807,rs690191,-1.178  
18,117.828,rs11150948,-1.134  
18,117.847,rs3991209,-1.083  
18,117.859,rs4891017,-1.077  
18,117.920,rs690243,-1.065  
18,118.045,rs17355430,-1.036  
18,118.075,rs11662423,-1.029  
18,118.114,rs2042717,-0.988  
18,118.169,rs12456640,-0.962  
18,118.221,rs9676094,-0.894  
18,118.240,rs7232036,-0.890  
18,118.269,rs2174896,-0.879  
18,118.277,rs9958262,-0.887



18,118.335,rs12327455,-0.872  
18,118.384,rs8084598,-0.856  
18,118.392,rs8098963,-0.845  
18,118.424,rs4891028,-0.807  
18,118.430,rs1553664,-0.795  
18,118.441,rs10514219,-0.779  
18,118.458,rs9951738,-0.758  
18,118.473,rs4635419,-0.730  
18,118.535,rs9952696,-0.661  
18,118.571,rs3829636,-0.626  
18,118.596,rs9945487,-0.575  
18,118.671,rs9957453,-0.624  
18,118.711,rs11876497,-0.631  
18,118.739,rs11660099,-0.636  
18,118.793,rs2174893,-0.693  
18,118.809,rs8086928,-0.700  
18,118.899,rs9947426,-0.732  
18,119.003,rs17650693,-0.619  
18,119.004,rs4890926,-0.618  
18,119.136,rs9949626,-0.583  
18,119.165,rs4552096,-0.583  
18,119.474,rs12957245,-0.588  
18,119.771,rs9675994,-0.589  
18,119.799,rs470903,-0.596  
18,119.805,rs3794842,-0.597  
18,119.824,rs470261,-0.598  
18,119.854,rs4890876,-0.600  
18,119.903,rs8092433,-0.586  
18,119.940,rs470542,-0.600  
18,120.004,rs7241461,-0.646  
18,120.068,rs9959822,-0.466  
18,120.084,rs1667914,-0.454  
18,120.098,rs4890890,-0.430  
18,120.112,rs4890891,-0.424  
18,120.125,rs4890893,-0.385  
18,120.165,rs1789089,-0.361  
18,120.198,rs1789079,-0.336  
18,120.241,rs1789121,-0.327  
18,120.425,rs11151009,-0.302  
18,120.504,rs12964446,-0.272  
18,120.586,rs2850889,-0.220  
18,120.680,rs2717128,-0.179  
18,120.785,rs7232802,-0.137  
18,120.829,rs874299,-0.151  
18,120.860,rs4480888,-0.177  
18,120.866,rs7244908,-0.204  
18,120.882,rs7241510,-0.194  
18,120.884,rs7231666,-0.219  
18,120.892,rs8085467,-0.252  
18,120.935,rs11659340,-0.368  
18,120.952,rs756238,-0.426  
18,120.982,rs7239601,-0.534  
18,120.985,rs4890948,-0.528  
18,120.990,rs12606766,-0.517  
18,120.997,rs7505169,-0.542  
18,121.104,rs8087753,-0.584  
18,121.114,rs517543,-0.580  
18,121.130,rs512467,-0.559  
18,121.188,rs12456242,-0.483  
18,121.199,rs954043,-0.469  
18,121.209,rs2246422,-0.470

18,121.271,rs2135401,-0.477  
18,121.304,rs6566033,-0.453  
18,121.310,rs12956032,-0.452  
18,121.330,rs2407044,-0.448  
18,121.391,rs12457067,-0.423  
18,121.433,rs9949956,-0.451  
18,121.485,rs11665253,-0.503  
18,121.529,rs7234776,-0.532  
18,121.539,rs4799153,-0.527  
18,121.545,rs4798954,-0.559  
18,121.550,rs11662621,-0.507  
18,121.558,rs9965906,-0.501  
18,121.565,rs1505131,-0.498  
18,121.585,rs1505129,-0.494  
18,121.609,rs7237276,-0.496  
18,121.632,rs7227404,-0.528  
18,121.666,rs8087551,-0.613  
18,121.684,rs4458091,-0.685  
18,121.693,rs11081602,-0.707  
18,121.724,rs8085865,-0.774  
18,121.738,rs5026446,-0.767  
18,121.742,rs612097,-0.717  
18,121.754,rs9949324,-0.718  
18,121.796,rs9960674,-0.724  
18,121.811,rs643444,-0.719  
18,121.822,rs673112,-0.708  
18,121.846,rs12607049,-0.685  
18,121.888,rs8097843,-0.731  
18,121.895,rs7232988,-0.717  
18,121.949,rs6506837,-0.670  
18,122.067,rs2941853,-0.598  
18,122.070,rs2941812,-0.595  
18,122.089,rs8092008,-0.557  
18,122.130,rs2015066,-0.481  
18,122.136,rs9945493,-0.478  
18,122.169,rs6506853,-0.460  
18,122.183,rs1113678,-0.455  
18,122.242,rs4799238,-0.431  
18,122.249,rs2927260,-0.431  
18,122.263,rs6506869,-0.431  
18,122.278,rs4030885,-0.426  
18,122.317,rs9957519,-0.414  
18,122.343,rs558191,-0.421  
18,122.605,rs8082857,-0.499  
18,122.664,rs12458154,-0.470  
18,122.728,rs549752,-0.397  
18,122.734,rs8091180,-0.390  
18,122.750,rs4799055,-0.353  
18,122.767,rs306872,-0.351  
18,122.807,rs1667667,-0.400  
18,122.835,rs177820,-0.438  
18,122.846,rs9518,-0.443  
18,122.848,rs3852836,-0.442  
18,122.856,rs4799062,-0.437  
18,122.880,rs3852840,-0.439  
18,122.903,rs4239343,-0.432  
18,122.910,rs748938,-0.446  
18,122.914,rs3848478,-0.447  
18,123.073,rs585811,-0.422  
18,123.085,rs526260,-0.412  
18,123.115,rs2126083,-0.406

18,123.226,rs10853393,-0.382  
18,123.236,rs8083927,-0.416  
18,123.313,rs3744872,-0.418  
18,123.349,rs488292,-0.418  
18,123.461,rs7243052,-0.419  
19,0.162,rs11878692,-0.005  
19,0.182,rs9304882,-0.005  
19,0.284,rs3764640,-0.010  
19,0.466,rs2301759,-0.010  
19,0.607,rs968698,-0.010  
19,0.831,rs1558130,-0.007  
19,1.155,rs2285972,-0.003  
19,1.471,rs3786978,-0.004  
19,2.001,rs197198,-0.012  
19,2.120,rs2292453,-0.030  
19,2.183,rs1875960,-0.036  
19,2.187,rs11878864,-0.036  
19,2.429,rs7252741,-0.040  
19,2.831,rs1860661,-0.079  
19,2.967,rs12460684,-0.067  
19,3.089,rs11084906,-0.067  
19,3.191,rs2041218,-0.062  
19,3.234,rs4807953,-0.058  
19,3.543,rs4807140,-0.080  
19,3.606,rs3764606,-0.080  
19,3.670,rs8100856,-0.079  
19,4.384,rs4807169,-0.057  
19,4.397,rs11084919,-0.057  
19,4.417,rs7259201,-0.056  
19,4.620,rs2041120,-0.054  
19,4.918,rs10421179,-0.049  
19,5.096,rs1599860,-0.054  
19,5.264,rs758145,-0.081  
19,5.302,rs7256023,-0.085  
19,5.552,rs2072304,-0.112  
19,5.578,rs1017084,-0.113  
19,5.895,rs2864419,-0.127  
19,6.132,rs12459507,-0.132  
19,6.214,rs7253181,-0.143  
19,6.338,rs4806834,-0.164  
19,6.420,rs2523177,-0.168  
19,6.836,rs12982784,-0.193  
19,6.916,rs757322,-0.196  
19,7.162,rs7248779,-0.205  
19,7.269,rs735911,-0.194  
19,7.622,rs13345846,-0.141  
19,7.634,rs11670333,-0.139  
19,7.681,rs4807284,-0.132  
19,7.716,rs8113001,-0.126  
19,7.718,rs8100484,-0.126  
19,7.749,rs10416524,-0.178  
19,7.790,rs17755100,-0.194  
19,7.807,rs12985186,-0.194  
19,7.912,rs8113423,-0.175  
19,7.943,rs887270,-0.172  
19,7.997,rs12975010,-0.199  
19,8.015,rs10416033,-0.204  
19,8.081,rs3936139,-0.195  
19,8.134,rs2965208,-0.168  
19,8.159,rs2873409,-0.149  
19,8.193,rs10411547,-0.139

19,8.199,rs7257500,-0.138  
19,8.312,rs9630890,-0.166  
19,8.385,rs2110119,-0.184  
19,8.647,rs4806874,-0.214  
19,9.042,rs1610062,-0.275  
19,9.053,rs4806877,-0.276  
19,9.154,rs9304900,-0.267  
19,9.319,rs2288958,-0.238  
19,9.380,rs3786948,-0.257  
19,9.453,rs11666431,-0.270  
19,9.488,rs8111642,-0.226  
19,9.542,rs11667371,-0.231  
19,9.647,rs216276,-0.331  
19,9.653,rs83488,-0.336  
19,9.664,rs11084990,-0.338  
19,9.679,rs3760961,-0.347  
19,9.757,rs1688128,-0.367  
19,9.950,rs7938,-0.332  
19,10.031,rs367825,-0.330  
19,10.155,rs8109448,-0.317  
19,10.371,rs2238625,-0.333  
19,10.455,rs3746069,-0.362  
19,10.611,rs310686,-0.413  
19,10.636,rs1465245,-0.429  
19,10.792,rs2074864,-0.482  
19,10.793,rs2074865,-0.482  
19,10.876,rs1682809,-0.499  
19,10.987,rs3746070,-0.490  
19,11.182,rs426633,-0.462  
19,11.364,rs17696630,-0.450  
19,11.423,rs11879556,-0.469  
19,11.474,rs313784,-0.448  
19,11.475,rs17674346,-0.449  
19,11.493,rs7252291,-0.477  
19,11.525,rs4807437,-0.528  
19,11.572,rs4807441,-0.574  
19,11.635,rs10405694,-0.623  
19,11.677,rs4807451,-0.643  
19,11.742,rs718202,-0.653  
19,11.872,rs4806933,-0.706  
19,11.933,rs4806934,-0.741  
19,12.238,rs4807485,-0.763  
19,12.300,rs7248491,-0.800  
19,12.394,rs11085023,-0.852  
19,12.444,rs8113232,-0.902  
19,12.460,rs2108389,-0.917  
19,12.575,rs10412882,-0.910  
19,12.689,rs757454,-0.904  
19,12.742,rs11672559,-0.894  
19,12.814,rs740873,-0.897  
19,12.972,rs501168,-0.871  
19,13.027,rs13960,-0.857  
19,13.125,rs4807511,-0.857  
19,13.173,rs2285957,-0.845  
19,13.336,rs11670741,-0.829  
19,13.398,rs10401177,-0.818  
19,13.451,rs11085044,-0.771  
19,13.508,rs3810374,-0.750  
19,13.574,rs10412199,-0.718  
19,13.592,rs2304191,-0.733  
19,13.628,rs10406174,-0.760

19,13.850,rs3760903,-0.679  
19,14.140,rs350912,-0.594  
19,14.207,rs12459940,-0.585  
19,14.278,rs350825,-0.572  
19,14.358,rs16992288,-0.586  
19,14.412,rs352493,-0.596  
19,14.416,rs4807546,-0.597  
19,14.428,rs352494,-0.605  
19,14.523,rs8110516,-0.652  
19,14.620,rs353694,-0.718  
19,14.768,rs888930,-0.747  
19,14.959,rs8102860,-0.760  
19,15.235,rs243372,-0.697  
19,15.358,rs10421126,-0.723  
19,15.428,rs892161,-0.733  
19,15.556,rs11085080,-0.739  
19,15.570,rs966384,-0.741  
19,15.576,rs4806985,-0.744  
19,15.622,rs1610093,-0.760  
19,15.625,rs10409783,-0.761  
19,15.637,rs16992439,-0.767  
19,15.637,rs7249087,-0.767  
19,15.757,rs7255247,-0.824  
19,15.883,rs11880374,-0.883  
19,15.896,rs9917028,-0.885  
19,16.129,rs7251000,-0.880  
19,16.302,rs879564,-0.954  
19,16.347,rs11085096,-0.969  
19,16.470,rs4807650,-0.999  
19,16.532,rs2779180,-0.940  
19,16.567,rs1055919,-0.934  
19,16.642,rs8105711,-0.924  
19,16.690,rs2656938,-0.861  
19,16.739,rs4807664,-0.847  
19,16.811,rs262566,-0.870  
19,16.834,rs2250978,-0.864  
19,16.854,rs2307204,-0.858  
19,17.135,rs2613766,-0.783  
19,17.440,rs2620812,-0.777  
19,17.557,rs2379609,-0.920  
19,17.583,rs10415488,-0.923  
19,17.600,rs886936,-0.932  
19,17.612,rs4807016,-0.939  
19,17.753,rs1558138,-0.945  
19,17.778,rs3948683,-0.940  
19,17.779,rs16992922,-0.943  
19,17.824,rs1207118,-0.973  
19,17.850,rs875552,-0.960  
19,17.863,rs2082465,-0.965  
19,17.908,rs8105522,-0.972  
19,17.940,rs4807030,-0.918  
19,18.006,rs6510851,-0.948  
19,18.024,rs1384936,-0.960  
19,18.031,rs8111234,-0.965  
19,18.104,rs8107825,-1.070  
19,18.139,rs668692,-1.066  
19,18.163,rs797544,-1.088  
19,18.252,rs675136,-1.056  
19,18.270,rs385839,-1.043  
19,18.369,rs2288947,-1.050  
19,18.379,rs8105637,-1.048

19,18.482,rs806705,-1.039  
19,18.740,rs2436508,-1.045  
19,18.924,rs3826798,-1.081  
19,18.962,rs6510857,-1.073  
19,19.042,rs778805,-1.050  
19,19.061,rs3760776,-1.053  
19,19.125,rs10426709,-1.106  
19,19.131,rs778972,-1.113  
19,19.220,rs8108064,-1.078  
19,19.319,rs7258475,-1.059  
19,19.374,rs628271,-1.047  
19,19.439,rs731773,-1.031  
19,19.470,rs530942,-1.072  
19,19.545,rs673153,-1.092  
19,19.687,rs9304930,-1.070  
19,19.867,rs2335629,-1.035  
19,20.128,rs1560694,-0.990  
19,20.196,rs8182608,-0.964  
19,20.278,rs4807078,-0.925  
19,20.305,rs872664,-0.902  
19,20.884,rs348365,-0.848  
19,20.903,rs8111177,-0.842  
19,20.952,rs1663803,-0.872  
19,20.997,rs3852883,-0.898  
19,21.023,rs371164,-0.901  
19,21.254,rs348374,-0.736  
19,21.292,rs422981,-0.681  
19,21.323,rs348347,-0.659  
19,21.363,rs1115478,-0.670  
19,21.419,rs344587,-0.669  
19,21.429,rs344589,-0.666  
19,21.431,rs17703895,-0.665  
19,21.504,rs344580,-0.658  
19,21.621,rs12462065,-0.672  
19,21.625,rs426374,-0.672  
19,21.638,rs447135,-0.673  
19,21.729,rs344560,-0.619  
19,21.744,rs1077667,-0.610  
19,21.775,rs379527,-0.586  
19,21.891,rs11672613,-0.518  
19,21.944,rs2250656,-0.487  
19,22.042,rs339408,-0.486  
19,22.051,rs339404,-0.488  
19,22.091,rs2305806,-0.479  
19,22.115,rs7258236,-0.459  
19,22.168,rs682626,-0.486  
19,22.202,rs568259,-0.511  
19,22.213,rs6510922,-0.513  
19,22.258,rs2660489,-0.520  
19,22.307,rs12610223,-0.510  
19,22.337,rs4807101,-0.471  
19,22.362,rs347033,-0.458  
19,22.400,rs3786688,-0.474  
19,22.405,rs11668094,-0.471  
19,22.467,rs331679,-0.491  
19,22.659,rs330876,-0.508  
19,22.788,rs3895916,-0.490  
19,22.950,rs625183,-0.407  
19,23.005,rs2035970,-0.476  
19,23.080,rs11665875,-0.472  
19,23.356,rs2352958,-0.414

19,23.369,rs2913877,-0.409  
19,23.417,rs2967657,-0.397  
19,23.444,rs1864193,-0.390  
19,23.448,rs3745550,-0.391  
19,23.503,rs11672739,-0.402  
19,23.503,rs6510949,-0.402  
19,23.525,rs2229431,-0.401  
19,23.536,rs8103483,-0.400  
19,23.610,rs7251963,-0.390  
19,23.666,rs2860183,-0.380  
19,23.765,rs7508679,-0.392  
19,23.815,rs3852876,-0.401  
19,23.930,rs7254921,-0.413  
19,24.070,rs11879985,-0.389  
19,24.083,rs4804602,-0.386  
19,24.224,rs11880140,-0.336  
19,24.266,rs3745356,-0.322  
19,24.291,rs1363938,-0.295  
19,24.349,rs661821,-0.287  
19,24.412,rs591040,-0.246  
19,24.465,rs577029,-0.209  
19,24.492,rs10418152,-0.193  
19,24.496,rs7260296,-0.163  
19,24.653,rs794084,-0.142  
19,24.772,rs3745367,-0.147  
19,24.848,rs2277989,-0.144  
19,24.854,rs10415518,-0.147  
19,24.860,rs1990975,-0.148  
19,24.902,rs10518270,-0.161  
19,24.936,rs1010047,-0.162  
19,24.974,rs7248637,-0.170  
19,24.997,rs11881682,-0.180  
19,25.030,rs7252764,-0.168  
19,25.058,rs608773,-0.157  
19,25.084,rs10906990,-0.157  
19,25.234,rs652260,-0.193  
19,25.334,rs525420,-0.216  
19,25.430,rs4804833,-0.202  
19,25.545,rs7252142,-0.148  
19,25.808,rs6603134,-0.123  
19,25.825,rs4804252,-0.124  
19,25.834,rs1104768,-0.124  
19,25.925,rs17160149,-0.115  
19,25.956,rs7245429,-0.111  
19,26.031,rs4527136,-0.098  
19,26.072,rs8112525,-0.090  
19,26.087,rs12162233,-0.087  
19,26.160,rs10416763,-0.093  
19,26.187,rs8112582,-0.092  
19,26.343,rs2967625,-0.071  
19,26.371,rs11666971,-0.073  
19,26.417,rs36253,-0.076  
19,26.422,rs36259,-0.077  
19,26.443,rs250508,-0.059  
19,26.447,rs7250584,-0.059  
19,26.589,rs2241590,-0.027  
19,26.714,rs2278236,-0.017  
19,26.788,rs2967614,-0.016  
19,27.053,rs7507526,-0.021  
19,27.145,rs1054623,-0.022  
19,27.278,rs11672367,-0.021

19,27.384,rs7249094,-0.025  
19,27.575,rs7254400,-0.043  
19,27.604,rs1561406,-0.046  
19,27.681,rs4804075,-0.054  
19,27.711,rs2967674,-0.054  
19,28.118,rs1423049,-0.052  
19,28.169,rs2972588,-0.048  
19,28.335,rs10854117,-0.056  
19,28.352,rs881877,-0.050  
19,28.372,rs7260214,-0.067  
19,28.419,rs12984694,-0.051  
19,28.514,rs10417520,-0.062  
19,28.543,rs4804394,-0.084  
19,28.631,rs11670174,-0.085  
19,28.714,rs8110010,-0.061  
19,28.725,rs1036224,-0.057  
19,28.769,rs2033483,-0.034  
19,28.787,rs8112516,-0.031  
19,28.845,rs7254803,-0.025  
19,29.006,rs10418968,-0.024  
19,29.016,rs12975784,-0.024  
19,29.100,rs17265036,-0.023  
19,29.360,rs10854157,-0.020  
19,29.721,rs10500208,-0.023  
19,29.969,rs2081066,-0.029  
19,30.104,rs9304984,-0.029  
19,30.110,rs8113425,-0.029  
19,30.197,rs6511284,-0.031  
19,30.206,rs8100015,-0.030  
19,30.247,rs10406152,-0.027  
19,30.299,rs2287807,-0.022  
19,30.328,rs2287802,-0.018  
19,30.343,rs889125,-0.016  
19,30.351,rs3786701,-0.009  
19,30.360,rs1644733,-0.015  
19,30.372,rs2431820,-0.014  
19,30.376,rs10401453,-0.014  
19,30.414,rs11883054,-0.016  
19,30.458,rs897803,-0.018  
19,30.494,rs1979262,-0.020  
19,30.503,rs15723,-0.020  
19,30.628,rs2228611,-0.006  
19,30.756,rs10409243,-0.002  
19,30.824,rs8111930,-0.002  
19,30.877,rs5498,-0.004  
19,30.879,rs3093032,-0.003  
19,30.916,rs2291473,-0.003  
19,30.973,rs2278442,-0.002  
19,30.982,rs7258015,-0.002  
19,31.061,rs280500,-0.002  
19,31.209,rs7256672,-0.001  
19,31.286,rs3745249,-0.001  
19,31.550,rs1541596,-0.002  
19,31.581,rs1529711,-0.002  
19,31.636,rs12459603,-0.002  
19,31.658,rs13345127,-0.001  
19,31.698,rs1529729,-0.001  
19,31.724,rs11668477,-0.000  
19,31.782,rs892115,0.001  
19,31.791,rs7188,0.003  
19,31.799,rs4804149,0.007



19,31.799,rs379309,0.007  
19,31.817,rs754528,0.006  
19,31.918,rs322141,0.001  
19,31.924,rs7417,0.000  
19,31.951,rs7251786,-0.000  
19,31.958,rs8108707,-0.000  
19,31.987,rs2291516,-0.000  
19,32.126,rs12984574,-0.000  
19,32.146,rs889366,-0.000  
19,32.212,rs13345223,-0.000  
19,32.221,rs7255420,-0.000  
19,32.269,rs893546,-0.000  
19,32.269,rs17638694,-0.000  
19,32.327,rs11880217,-0.000  
19,32.354,rs17706051,-0.000  
19,32.358,rs11666071,-0.000  
19,32.373,rs12981699,-0.001  
19,32.466,rs11881952,-0.000  
19,32.517,rs8102143,0.000  
19,32.762,rs722571,0.000  
19,33.069,rs11085825,-0.000  
19,33.088,rs11667458,-0.000  
19,33.113,rs8107173,-0.000  
19,33.245,rs7250834,-0.001  
19,33.249,rs8103241,-0.001  
19,33.521,rs892020,-0.003  
19,33.551,rs8109821,-0.000  
19,33.554,rs8113706,-0.000  
19,33.556,rs10854122,-0.000  
19,33.660,rs3816027,-0.000  
19,33.744,rs7251403,0.002  
19,33.758,rs4926249,0.002  
19,33.797,rs12608501,0.003  
19,33.826,rs4499352,0.003  
19,33.872,rs8101955,0.003  
19,33.899,rs7256928,0.004  
19,33.925,rs4926278,0.000  
19,34.062,rs4926285,-0.000  
19,34.149,rs1363345,0.000  
19,34.153,rs4926290,0.000  
19,34.163,rs11879128,-0.001  
19,34.185,rs1862260,0.000  
19,34.283,rs16979195,0.002  
19,34.316,rs10414182,0.003  
19,34.391,rs11668370,0.004  
19,34.529,rs10416242,0.000  
19,34.733,rs346144,0.001  
19,34.858,rs346155,0.002  
19,34.881,rs416162,0.001  
19,34.924,rs2607272,0.000  
19,34.985,rs3745454,0.000  
19,35.079,rs8107465,-0.000  
19,35.235,rs2305777,-0.008  
19,35.248,rs2305778,-0.008  
19,35.250,rs2305779,-0.008  
19,35.300,rs1056143,-0.008  
19,35.538,rs2306190,-0.013  
19,35.619,rs8100676,-0.018  
19,35.743,rs10421422,-0.027  
19,35.971,rs12151240,-0.015  
19,36.000,rs4528684,-0.016

19,36.081,rs498284,-0.017  
19,36.096,rs492049,-0.025  
19,36.160,rs888876,-0.016  
19,36.350,rs9917042,-0.032  
19,36.366,rs4517893,-0.035  
19,36.370,rs2230748,-0.035  
19,36.381,rs3815716,-0.039  
19,36.411,rs7258844,-0.050  
19,36.438,rs4926214,-0.062  
19,36.481,rs4926221,-0.068  
19,36.527,rs7252966,-0.073  
19,36.537,rs8104167,-0.075  
19,36.584,rs11878770,-0.077  
19,36.623,rs726788,-0.054  
19,36.632,rs8113491,-0.053  
19,36.728,rs2524363,-0.063  
19,36.809,rs3965461,-0.052  
19,36.828,rs8107904,-0.082  
19,36.937,rs8100775,-0.089  
19,37.046,rs3752192,-0.060  
19,37.131,rs8108703,-0.051  
19,37.155,rs11085914,-0.050  
19,37.206,rs10421024,-0.052  
19,37.296,rs4569396,-0.056  
19,37.374,rs7250965,-0.057  
19,37.406,rs715159,-0.057  
19,37.669,rs11085928,-0.041  
19,37.708,rs7252267,-0.035  
19,37.717,rs10402035,-0.045  
19,37.799,rs6512003,-0.032  
19,37.864,rs714920,-0.036  
19,37.935,rs8105737,-0.035  
19,37.953,rs7251788,-0.034  
19,37.974,rs2074265,-0.034  
19,38.002,rs1114312,-0.034  
19,38.043,rs2074616,-0.032  
19,38.068,rs7258642,-0.026  
19,38.107,rs4808272,-0.017  
19,38.332,rs8102864,-0.044  
19,38.351,rs4809198,-0.043  
19,38.363,rs4310987,-0.051  
19,38.365,rs6512044,-0.050  
19,38.379,rs17722016,-0.041  
19,38.406,rs665586,-0.026  
19,38.432,rs4646522,-0.024  
19,38.433,rs7254518,-0.024  
19,38.480,rs4808358,-0.025  
19,38.627,rs8102407,-0.015  
19,38.796,rs4808416,-0.010  
19,38.801,rs1594688,-0.010  
19,38.935,rs7251800,-0.012  
19,38.955,rs6512081,-0.011  
19,39.070,rs4808019,-0.005  
19,39.158,rs8110325,-0.000  
19,39.159,rs998316,-0.000  
19,39.205,rs16981095,0.005  
19,39.217,rs17708984,0.008  
19,39.330,rs2241400,0.011  
19,39.334,rs1043346,0.011  
19,39.341,rs10406557,0.011  
19,39.408,rs12461400,0.012

19,39.499,rs3855681,0.013  
19,39.528,rs501537,0.013  
19,39.739,rs7259026,0.009  
19,39.763,rs12461136,0.010  
19,39.821,rs754292,0.010  
19,39.842,rs11672396,0.010  
19,39.882,rs4808051,0.011  
19,40.019,rs7247204,0.011  
19,40.050,rs878506,0.012  
19,40.071,rs812847,0.006  
19,40.129,rs773845,0.006  
19,40.605,rs8108315,0.008  
19,40.700,rs2227356,0.007  
19,40.790,rs8102899,0.006  
19,40.798,rs11086039,0.006  
19,40.917,rs8111257,0.013  
19,41.106,rs2353203,0.004  
19,41.109,rs8101816,0.004  
19,41.160,rs8112434,0.001  
19,41.161,rs2168632,0.001  
19,41.179,rs6512158,0.000  
19,41.196,rs8106270,0.001  
19,41.269,rs873513,0.000  
19,41.322,rs2305758,-0.000  
19,41.340,rs10469470,-0.000  
19,41.385,rs4808629,-0.000  
19,41.657,rs1035872,-0.000  
19,41.933,rs11666579,-0.003  
19,42.211,rs2375592,-0.002  
19,42.455,rs7246258,-0.001  
19,42.626,rs7249148,-0.001  
19,42.636,rs10422926,-0.001  
19,42.709,rs3746200,-0.002  
19,42.711,rs3746199,-0.002  
19,42.727,rs7250113,-0.003  
19,42.949,rs11879994,-0.008  
19,42.965,rs12608932,-0.008  
19,43.017,rs6512205,-0.009  
19,43.097,rs12978632,-0.010  
19,43.153,rs6512211,-0.020  
19,43.198,rs10419687,-0.057  
19,43.283,rs12978218,-0.068  
19,43.444,rs11673001,-0.097  
19,43.822,rs13345379,-0.135  
19,43.900,rs17654456,-0.127  
19,43.916,rs265548,-0.130  
19,44.073,rs11086080,-0.193  
19,44.168,rs3212701,-0.277  
19,44.168,rs2110586,-0.277  
19,44.259,rs6512236,-0.272  
19,44.346,rs7252014,-0.220  
19,44.414,rs17654580,-0.216  
19,44.432,rs91710,-0.202  
19,44.454,rs12973060,-0.188  
19,44.470,rs434815,-0.189  
19,44.584,rs3746188,-0.170  
19,44.644,rs7125,-0.161  
19,44.773,rs1469023,-0.149  
19,44.798,rs4254438,-0.117  
19,44.861,rs12985909,-0.111  
19,44.877,rs1978423,-0.113

19,44.912,rs3746183,-0.107  
19,44.919,rs749451,-0.103  
19,44.943,rs8101804,-0.098  
19,45.045,rs731945,-0.084  
19,45.092,rs7251067,-0.078  
19,45.208,rs3761034,-0.088  
19,45.352,rs3795027,-0.095  
19,45.352,rs3795028,-0.095  
19,45.409,rs757318,-0.097  
19,45.467,rs2240887,-0.099  
19,45.513,rs10038,-0.097  
19,45.546,rs2313048,-0.103  
19,45.564,rs8104653,-0.105  
19,45.699,rs10403594,-0.132  
19,45.715,rs2301661,-0.132  
19,45.930,rs964132,-0.195  
19,45.933,rs3746259,-0.195  
19,45.956,rs7257072,-0.192  
19,45.993,rs1050483,-0.195  
19,46.369,rs892023,-0.244  
19,46.399,rs7252981,-0.250  
19,46.501,rs2304130,-0.269  
19,46.507,rs7247433,-0.270  
19,46.562,rs8110890,-0.270  
19,46.563,rs247767,-0.270  
19,46.577,rs247789,-0.271  
19,46.594,rs8110431,-0.270  
19,46.600,rs248943,-0.270  
19,46.784,rs12460082,-0.290  
19,46.852,rs2335887,-0.300  
19,47.026,rs11673382,-0.327  
19,47.049,rs11878327,-0.334  
19,47.165,rs2078584,-0.360  
19,47.175,rs10425466,-0.366  
19,47.242,rs6511099,-0.418  
19,47.460,rs7254995,-0.604  
19,47.463,rs1862466,-0.605  
19,47.513,rs8101643,-0.598  
19,47.608,rs7252706,-0.521  
19,47.622,rs2015481,-0.493  
19,47.663,rs2435039,-0.409  
19,47.679,rs10424424,-0.380  
19,47.680,rs1965611,-0.379  
19,47.761,rs2957807,-0.393  
19,47.762,rs8101792,-0.395  
19,47.767,rs4932769,-0.441  
19,47.771,rs7245541,-0.389  
19,47.791,rs12980509,-0.295  
19,47.793,rs7252224,-0.294  
19,47.823,rs11668225,-0.287  
19,47.837,rs7246878,-0.282  
19,47.846,rs376789,-0.262  
19,47.871,rs13346109,-0.259  
19,47.877,rs2099351,-0.258  
19,47.919,rs2195987,-0.241  
19,48.370,rs7255207,-0.220  
19,48.371,rs811020,-0.220  
19,48.377,rs2190803,-0.221  
19,48.381,rs7248185,-0.230  
19,48.386,rs10409248,-0.239  
19,48.388,rs16970394,-0.242

19,48.390,rs7250467,-0.244  
19,48.392,rs9973221,-0.242  
19,48.393,rs11669016,-0.241  
19,48.394,rs10500233,-0.241  
19,48.395,rs17714483,-0.241  
19,48.411,rs1840812,-0.225  
19,48.416,rs12460063,-0.225  
19,48.420,rs736286,-0.236  
19,48.425,rs10414856,-0.251  
19,48.428,rs4806416,-0.249  
19,48.430,rs7246810,-0.248  
19,48.472,rs16962149,-0.193  
19,48.474,rs7249269,-0.192  
19,48.476,rs4805292,-0.186  
19,48.480,rs4805303,-0.161  
19,48.495,rs10516718,-0.137  
19,48.497,rs6509228,-0.129  
19,48.498,rs2278441,-0.124  
19,48.504,rs10424053,-0.119  
19,48.508,rs13382050,-0.100  
19,48.515,rs11666812,-0.114  
19,48.519,rs7408479,-0.121  
19,48.520,rs8102600,-0.127  
19,48.528,rs1558363,-0.184  
19,48.529,rs740880,-0.164  
19,48.533,rs892074,-0.161  
19,48.534,rs10412776,-0.162  
19,48.536,rs12982054,-0.158  
19,48.540,rs2195954,-0.159  
19,48.541,rs12461407,-0.162  
19,48.543,rs2082455,-0.165  
19,48.546,rs892071,-0.199  
19,48.546,rs734837,-0.206  
19,48.550,rs8106720,-0.220  
19,48.553,rs10411749,-0.212  
19,48.554,rs1035936,-0.241  
19,48.563,rs9566,-0.219  
19,48.566,rs16963209,-0.206  
19,48.578,rs4805487,-0.180  
19,48.581,rs4805495,-0.179  
19,48.582,rs4805496,-0.178  
19,48.587,rs2080887,-0.138  
19,48.593,rs11668282,-0.138  
19,48.603,rs9304767,-0.163  
19,48.605,rs2903361,-0.169  
19,48.605,rs399246,-0.172  
19,48.607,rs335776,-0.192  
19,48.620,rs758326,-0.160  
19,48.621,rs4805532,-0.136  
19,48.626,rs16964067,-0.135  
19,48.630,rs4804925,-0.137  
19,48.633,rs6510150,-0.137  
19,48.636,rs7247350,-0.124  
19,48.639,rs1433071,-0.133  
19,48.641,rs8112477,-0.130  
19,48.645,rs3786804,-0.126  
19,48.654,rs4805579,-0.108  
19,48.655,rs10424191,-0.121  
19,48.658,rs2060241,-0.122  
19,48.662,rs16964473,-0.113  
19,48.666,rs12460988,-0.110

19,48.667,rs7258628,-0.108  
19,48.670,rs4805602,-0.097  
19,48.673,rs1184398,-0.094  
19,48.681,rs10414458,-0.078  
19,48.683,rs4341857,-0.073  
19,48.684,rs735757,-0.076  
19,48.688,rs4548998,-0.071  
19,48.700,rs276767,-0.091  
19,48.712,rs10500250,-0.075  
19,48.720,rs8102512,-0.066  
19,48.733,rs16965432,-0.035  
19,48.734,rs10412617,-0.033  
19,48.734,rs4804960,-0.033  
19,48.736,rs10425645,-0.033  
19,48.737,rs1039106,-0.033  
19,48.747,rs10420013,-0.035  
19,48.751,rs10421853,-0.034  
19,48.757,rs11084588,-0.029  
19,48.758,rs7247652,-0.029  
19,48.761,rs11672575,-0.027  
19,48.769,rs8112540,-0.032  
19,48.772,rs17501293,-0.028  
19,48.779,rs892037,-0.024  
19,48.779,rs17593731,-0.024  
19,48.780,rs370138,-0.025  
19,48.795,rs1865055,-0.022  
19,48.802,rs10407246,-0.030  
19,48.802,rs11084608,-0.031  
19,48.803,rs12982128,-0.031  
19,48.804,rs2075411,-0.031  
19,48.810,rs8102897,-0.021  
19,48.820,rs12610340,-0.005  
19,48.823,rs8103440,-0.003  
19,48.827,rs8101952,-0.000  
19,48.829,rs758638,-0.000  
19,48.839,rs1468918,-0.002  
19,48.842,rs8105931,-0.002  
19,48.848,rs7252763,-0.002  
19,48.849,rs718384,-0.002  
19,48.857,rs9304836,-0.001  
19,48.874,rs2059058,-0.000  
19,48.877,rs17692472,0.000  
19,48.879,rs7251512,0.000  
19,48.899,rs2868145,0.001  
19,48.937,rs2287669,0.002  
19,48.965,rs10422710,0.002  
19,49.060,rs1035478,0.002  
19,49.075,rs745961,0.002  
19,49.111,rs751731,0.002  
19,49.126,rs10410414,0.002  
19,49.187,rs8113143,0.005  
19,49.215,rs17694094,0.001  
19,49.219,rs748680,0.002  
19,49.228,rs736289,0.005  
19,49.231,rs889108,0.005  
19,49.236,rs1990966,0.005  
19,49.237,rs7259974,0.005  
19,49.238,rs11084724,0.005  
19,49.316,rs10425678,0.000  
19,49.329,rs33840,-0.000  
19,49.343,rs1864131,-0.000

19,49.351,rs12979271,-0.000  
19,49.371,rs8112967,0.000  
19,49.377,rs16968313,0.000  
19,49.380,rs1035937,0.000  
19,49.385,rs1469108,0.001  
19,49.390,rs16968366,0.001  
19,49.397,rs16968399,0.001  
19,49.397,rs10419302,0.000  
19,49.416,rs206042,0.009  
19,49.417,rs17325358,0.009  
19,49.422,rs10520203,0.009  
19,49.423,rs284687,0.009  
19,49.442,rs16968492,0.013  
19,49.442,rs11673608,0.013  
19,49.443,rs17247661,0.013  
19,49.461,rs11672221,0.024  
19,49.465,rs256335,0.026  
19,49.474,rs1006359,0.029  
19,49.484,rs2112507,0.033  
19,49.490,rs12975931,0.031  
19,49.504,rs10422153,0.017  
19,49.765,rs7245865,0.016  
19,50.119,rs244772,0.014  
19,50.186,rs2121139,0.015  
19,50.208,rs554438,0.015  
19,50.587,rs11671685,0.031  
19,50.621,rs1862491,0.030  
19,50.687,rs10500272,0.026  
19,50.728,rs2199640,0.023  
19,50.853,rs11084777,0.023  
19,51.071,rs10409480,0.012  
19,51.110,rs3746236,0.009  
19,51.177,rs8106116,0.006  
19,51.234,rs2651090,0.009  
19,51.437,rs295771,0.028  
19,51.460,rs2290642,0.031  
19,51.478,rs870379,0.033  
19,51.508,rs12151195,0.046  
19,51.540,rs1687982,0.061  
19,51.562,rs7250814,0.049  
19,51.642,rs3761072,0.045  
19,51.651,rs1672989,0.045  
19,51.660,rs2290650,0.046  
19,51.898,rs1633921,0.072  
19,52.128,rs7251432,0.122  
19,52.143,rs10402233,0.114  
19,52.160,rs2301600,0.105  
19,52.190,rs9304870,0.107  
19,52.288,rs2239511,0.105  
19,52.305,rs12985354,0.108  
19,52.314,rs16970264,0.110  
19,52.329,rs387083,0.113  
19,52.374,rs16970276,0.116  
19,52.429,rs16970293,0.124  
19,52.473,rs4806155,0.114  
19,52.485,rs7252554,0.111  
19,52.502,rs8101851,0.093  
19,52.587,rs10407971,0.054  
19,52.610,rs2293695,0.049  
19,52.635,rs7247001,0.049  
19,52.635,rs12460932,0.049

19,52.641,rs4805127,0.051  
19,52.659,rs2285513,0.052  
19,52.688,rs11882238,0.053  
19,52.719,rs12609727,0.047  
19,52.737,rs11882733,0.044  
19,52.763,rs8112614,0.040  
19,52.934,rs10422762,0.023  
19,53.181,rs11881242,0.019  
19,53.194,rs3761097,0.019  
19,53.202,rs401522,0.019  
19,53.203,rs11671781,0.019  
19,53.230,rs12610011,0.022  
19,53.260,rs10409299,0.026  
19,53.523,rs8105993,0.023  
19,53.539,rs1005194,0.023  
19,53.676,rs1009381,0.012  
19,53.747,rs1016994,0.016  
19,53.765,rs7250473,0.017  
19,53.827,rs10410162,0.017  
19,53.922,rs2972527,0.021  
19,54.494,rs7259256,0.008  
19,54.675,rs3108582,0.005  
19,55.076,rs1035441,0.002  
19,55.125,rs10403877,0.001  
19,55.551,rs16972024,-0.000  
19,55.973,rs11666245,-0.002  
19,55.996,rs241951,-0.002  
19,56.009,rs3910952,-0.002  
19,56.114,rs10422365,-0.001  
19,56.159,rs7249265,-0.003  
19,56.174,rs1725489,-0.008  
19,56.558,rs7253473,-0.013  
19,56.726,rs8101725,-0.010  
19,57.057,rs12609878,-0.006  
19,57.123,rs8103619,-0.007  
19,57.233,rs10409638,-0.012  
19,57.308,rs3786829,-0.011  
19,57.613,rs973009,-0.009  
19,57.644,rs4802747,-0.008  
19,57.887,rs7248208,-0.007  
19,58.005,rs11879029,-0.010  
19,58.016,rs10410544,-0.010  
19,58.289,rs10417436,-0.013  
19,58.616,rs11882959,-0.014  
19,58.697,rs8109886,-0.013  
19,58.700,rs16973285,-0.013  
19,58.765,rs503355,-0.009  
19,58.841,rs251896,-0.005  
19,58.969,rs11665711,-0.001  
19,59.004,rs16973403,-0.001  
19,59.016,rs2277743,-0.001  
19,59.041,rs31726,-0.001  
19,59.322,rs4803254,-0.001  
19,59.500,rs1433110,-0.001  
19,59.724,rs2270028,-0.002  
19,59.839,rs12463334,-0.003  
19,59.854,rs1126159,-0.003  
19,60.386,rs978671,-0.007  
19,60.520,rs10426810,-0.008  
19,60.548,rs12463156,-0.008  
19,60.579,rs12162264,-0.011



19,60.985,rs12975624,-0.020  
19,61.016,rs7252868,-0.021  
19,61.155,rs10401972,-0.027  
19,61.259,rs234368,-0.026  
19,61.480,rs337799,-0.021  
19,61.712,rs892117,-0.021  
19,61.746,rs2304185,-0.021  
19,61.751,rs874269,-0.021  
19,62.172,rs268691,-0.014  
19,62.243,rs10401458,-0.024  
19,62.314,rs10413521,-0.040  
19,62.415,rs1165838,-0.048  
19,62.532,rs7254268,-0.061  
19,62.542,rs2561563,-0.064  
19,62.609,rs3865452,-0.077  
19,62.680,rs2607426,-0.081  
19,62.711,rs7937,-0.083  
19,62.714,rs11881124,-0.083  
19,62.811,rs10521014,-0.098  
19,62.812,rs5007415,-0.098  
19,62.964,rs11666982,-0.123  
19,62.996,rs7254075,-0.126  
19,63.005,rs10513606,-0.127  
19,63.042,rs1709084,-0.129  
19,63.081,rs10426454,-0.118  
19,63.115,rs1645685,-0.122  
19,63.151,rs338600,-0.119  
19,63.168,rs168109,-0.079  
19,63.188,rs4803449,-0.060  
19,63.277,rs2217656,-0.040  
19,63.297,rs10417924,-0.036  
19,63.318,rs4803455,-0.031  
19,63.368,rs12610088,-0.027  
19,63.388,rs2215324,-0.016  
19,63.394,rs2109075,-0.021  
19,63.403,rs7251044,-0.020  
19,63.404,rs3928916,-0.020  
19,63.417,rs10413359,-0.011  
19,63.465,rs8099939,-0.009  
19,63.485,rs10421547,-0.005  
19,63.493,rs12610309,-0.004  
19,63.558,rs16975865,-0.004  
19,64.120,rs1859406,-0.001  
19,64.213,rs3213287,0.000  
19,64.284,rs8113762,0.001  
19,64.372,rs3046,0.002  
19,64.467,rs2302524,0.003  
19,64.486,rs2239372,0.003  
19,64.504,rs344783,0.006  
19,64.528,rs436681,0.005  
19,64.576,rs10403459,0.004  
19,64.593,rs346049,0.004  
19,64.688,rs1469711,0.004  
19,64.739,rs187008,0.003  
19,64.938,rs399098,0.002  
19,65.323,rs1236711,0.009  
19,65.463,rs16978840,0.009  
19,65.702,rs7251134,0.008  
19,65.884,rs204534,0.005  
19,65.982,rs1004605,0.006  
19,65.999,rs7260180,0.003

19,66.011,rs1727731,0.002  
19,66.017,rs17714646,0.002  
19,66.022,rs1661178,0.002  
19,66.025,rs1727748,0.002  
19,66.097,rs17801106,0.006  
19,66.134,rs2357107,0.008  
19,66.207,rs2965155,0.011  
19,66.236,rs10421830,0.010  
19,66.271,rs2965101,0.007  
19,66.280,rs2965174,0.008  
19,66.375,rs2968180,0.010  
19,66.444,rs4803766,0.024  
19,66.455,rs11667640,0.022  
19,66.464,rs2075650,0.035  
19,66.468,rs405509,0.035  
19,66.483,rs3760627,0.038  
19,66.514,rs10416445,0.029  
19,66.525,rs1469704,0.028  
19,66.540,rs10425074,0.032  
19,66.556,rs12460985,0.033  
19,66.562,rs2627641,0.035  
19,66.567,rs10422797,0.037  
19,66.580,rs10445572,0.040  
19,66.604,rs454421,0.035  
19,66.610,rs50871,0.046  
19,66.629,rs11615,0.034  
19,66.659,rs8099878,0.021  
19,66.664,rs16979873,0.020  
19,66.677,rs7256951,0.012  
19,66.702,rs10405576,0.010  
19,66.734,rs2334253,0.010  
19,66.786,rs2286756,0.005  
19,66.849,rs11672660,0.003  
19,66.860,rs2334255,0.002  
19,66.904,rs11668847,0.001  
19,66.991,rs10418603,0.000  
19,67.209,rs16980051,-0.001  
19,67.348,rs12460033,0.000  
19,67.405,rs10500293,0.000  
19,67.450,rs11672738,0.000  
19,67.481,rs11667587,0.000  
19,67.584,rs8102495,0.003  
19,67.621,rs2072561,0.002  
19,67.650,rs2007332,0.002  
19,67.700,rs8111075,0.002  
19,67.962,rs10439109,0.047  
19,68.155,rs10406931,0.076  
19,68.172,rs7259453,0.078  
19,68.176,rs4803913,0.080  
19,68.208,rs10153462,0.096  
19,68.248,rs3826795,0.108  
19,68.286,rs887946,0.117  
19,68.376,rs11670522,0.112  
19,68.390,rs12459321,0.107  
19,68.394,rs10412551,0.108  
19,68.439,rs2288913,0.109  
19,68.472,rs8102503,0.100  
19,68.481,rs8111536,0.094  
19,68.482,rs1975189,0.094  
19,68.522,rs10113,0.075  
19,68.541,rs931647,0.056

19,68.557,rs314669,0.072  
19,68.634,rs8105903,0.085  
19,68.657,rs6509294,0.082  
19,68.669,rs312185,0.086  
19,68.765,rs10425259,0.210  
19,68.780,rs11083855,0.231  
19,68.802,rs1862499,0.260  
19,68.885,rs10424953,0.284  
19,68.894,rs4804036,0.287  
19,68.898,rs7250152,0.281  
19,68.906,rs8112962,0.304  
19,68.907,rs10426874,0.304  
19,68.910,rs2252532,0.338  
19,68.918,rs12976740,0.307  
19,68.922,rs830145,0.345  
19,68.927,rs17271418,0.349  
19,68.940,rs2974216,0.388  
19,68.958,rs10412317,0.412  
19,68.961,rs9304671,0.415  
19,68.965,rs16982092,0.449  
19,68.966,rs12985868,0.457  
19,69.004,rs2303690,0.546  
19,69.019,rs1171099,0.547  
19,69.066,rs2386983,0.532  
19,69.117,rs1366442,0.561  
19,69.120,rs11564620,0.537  
19,69.191,rs156631,0.616  
19,69.198,rs11564538,0.613  
19,69.329,rs3730913,0.569  
19,69.422,rs972800,0.547  
19,69.479,rs1062808,0.533  
19,69.494,rs1966625,0.534  
19,69.926,rs1504520,0.587  
19,70.068,rs8182501,0.532  
19,70.215,rs275837,0.543  
19,70.519,rs1799270,0.566  
19,70.530,rs11083939,0.565  
19,70.531,rs12460535,0.565  
19,70.579,rs11880333,0.561  
19,70.644,rs504963,0.552  
19,70.715,rs8111317,0.598  
19,70.717,rs599951,0.615  
19,70.723,rs492734,0.664  
19,70.732,rs12974796,0.720  
19,70.759,rs2098684,0.714  
19,70.822,rs4802517,0.647  
19,70.841,rs2270943,0.628  
19,70.857,rs746075,0.613  
19,70.873,rs4801783,0.587  
19,70.897,rs11667229,0.550  
19,70.949,rs3764622,0.494  
19,70.960,rs7256033,0.482  
19,71.008,rs11669977,0.549  
19,71.015,rs17206784,0.555  
19,71.051,rs734570,0.559  
19,71.104,rs3745298,0.569  
19,71.122,rs2287923,0.586  
19,71.176,rs3848549,0.636  
19,71.212,rs8111390,0.656  
19,71.351,rs10405154,0.679  
19,71.400,rs2293011,0.640

19,71.511,rs13346402,0.612  
19,71.591,rs11880923,0.589  
19,71.696,rs3745469,0.550  
19,71.719,rs10415880,0.542  
19,71.796,rs12609870,0.511  
19,71.825,rs6509443,0.499  
19,71.832,rs2304202,0.499  
19,71.876,rs1674139,0.494  
19,71.987,rs1290650,0.501  
19,72.039,rs16981486,0.506  
19,72.123,rs4801810,0.513  
19,72.162,rs1152237,0.524  
19,72.189,rs283526,0.530  
19,72.357,rs734910,0.553  
19,72.358,rs3745495,0.553  
19,72.362,rs245110,0.555  
19,72.488,rs4280362,0.595  
19,72.516,rs6509454,0.610  
19,72.533,rs638286,0.621  
19,72.562,rs12608568,0.603  
19,72.617,rs630283,0.601  
19,72.673,rs3745504,0.600  
19,72.682,rs1651543,0.600  
19,72.688,rs788338,0.599  
19,72.702,rs667907,0.625  
19,72.752,rs7251148,0.700  
19,72.909,rs1405655,0.703  
19,73.002,rs3745516,0.718  
19,73.023,rs3816551,0.732  
19,73.112,rs1620498,0.771  
19,73.213,rs1150922,0.894  
19,73.221,rs1862479,0.898  
19,73.244,rs6509477,0.945  
19,73.293,rs2098683,0.892  
19,73.314,rs1978454,0.904  
19,73.348,rs6509485,0.941  
19,73.377,rs2042279,0.969  
19,73.448,rs8104662,1.036  
19,73.458,rs889135,1.027  
19,73.488,rs11879379,0.999  
19,73.494,rs889133,0.996  
19,73.532,rs3893128,0.964  
19,73.553,rs12460584,0.903  
19,73.569,rs8103945,0.959  
19,73.648,rs919276,0.992  
19,73.684,rs10853822,1.035  
19,73.698,rs8101336,0.980  
19,73.717,rs7248759,0.891  
19,73.749,rs2411335,0.833  
19,73.812,rs2247289,0.853  
19,73.874,rs2163861,0.898  
19,73.892,rs2569729,0.884  
19,73.907,rs266868,0.873  
19,73.918,rs3760722,0.882  
19,73.929,rs1058205,0.893  
19,73.935,rs8112276,0.893  
19,73.943,rs10401509,0.909  
19,73.993,rs1354774,0.991  
19,74.046,rs7248321,1.083  
19,74.053,rs2659079,1.093  
19,74.061,rs17714461,1.099

19,74.098,rs268914,1.126  
19,74.115,rs10409028,1.152  
19,74.135,rs4592765,1.131  
19,74.168,rs16988619,1.127  
19,74.188,rs1654523,1.208  
19,74.195,rs995788,1.287  
19,74.214,rs10451448,1.327  
19,74.220,rs1722560,1.332  
19,74.285,rs1474520,1.233  
19,74.319,rs2691229,1.223  
19,74.327,rs8105944,1.199  
19,74.360,rs1404318,1.130  
19,74.361,rs10426620,1.131  
19,74.373,rs1001538,1.140  
19,74.398,rs9304708,1.191  
19,74.416,rs2091181,1.254  
19,74.429,rs11666870,1.243  
19,74.463,rs9917107,1.205  
19,74.492,rs2075803,1.156  
19,74.517,rs1710378,1.165  
19,74.523,rs12983058,1.163  
19,74.594,rs273658,1.066  
19,74.609,rs7252160,1.036  
19,74.648,rs10421385,0.956  
19,74.756,rs273632,0.943  
19,74.758,rs10407329,0.942  
19,74.806,rs12985380,0.914  
19,74.828,rs2547321,0.916  
19,74.837,rs3826663,0.919  
19,74.847,rs2898691,0.971  
19,74.870,rs9304712,0.914  
19,74.912,rs11672925,0.904  
19,74.919,rs2864093,0.890  
19,74.948,rs3810110,0.813  
19,74.993,rs4802810,0.705  
19,75.001,rs10412859,0.695  
19,75.026,rs7245800,0.684  
19,75.040,rs7252645,0.692  
19,75.051,rs10500308,0.689  
19,75.069,rs11084095,0.692  
19,75.069,rs4802831,0.692  
19,75.072,rs17740650,0.692  
19,75.100,rs12462026,0.682  
19,75.100,rs7250849,0.682  
19,75.127,rs2902883,0.671  
19,75.146,rs2167418,0.676  
19,75.151,rs10422727,0.675  
19,75.162,rs4802851,0.670  
19,75.194,rs4801891,0.673  
19,75.211,rs12984050,0.662  
19,75.239,rs4802867,0.631  
19,75.284,rs8099997,0.624  
19,75.342,rs1549931,0.694  
19,75.393,rs1549932,0.718  
19,75.535,rs7254507,0.715  
19,75.554,rs3764537,0.714  
19,75.600,rs8104920,0.722  
19,75.612,rs11666474,0.704  
19,75.661,rs10420138,0.621  
19,75.758,rs9304727,0.591  
19,75.800,rs10414779,0.504

19,75.830,rs8112051,0.509  
19,75.908,rs2560878,0.488  
19,75.919,rs707312,0.480  
19,75.954,rs324120,0.466  
19,75.955,rs11879821,0.466  
19,75.974,rs2290745,0.477  
19,76.003,rs9630874,0.463  
19,76.017,rs2560996,0.410  
19,76.122,rs324748,0.408  
19,76.432,rs12971484,0.405  
19,76.438,rs329973,0.404  
19,76.469,rs10409120,0.402  
19,76.480,rs1056185,0.401  
19,76.640,rs8103317,0.415  
19,76.915,rs13344253,0.521  
19,76.929,rs10403312,0.524  
19,77.008,rs11667063,0.477  
19,77.084,rs12973596,0.497  
19,77.360,rs1966574,0.528  
19,77.524,rs1978616,0.573  
19,77.561,rs7251313,0.636  
19,77.603,rs11673295,0.602  
19,77.706,rs4803025,0.560  
19,77.750,rs1661957,0.536  
19,77.811,rs182775,0.482  
19,78.011,rs12151194,0.487  
19,78.077,rs10405102,0.551  
19,78.135,rs10419891,0.539  
19,78.236,rs7251341,0.509  
19,78.295,rs1661926,0.494  
19,78.298,rs1661929,0.494  
19,78.302,rs9967612,0.494  
19,78.423,rs4801959,0.522  
19,78.511,rs7247109,0.542  
19,78.524,rs8103620,0.546  
19,78.540,rs6509732,0.515  
19,78.724,rs2965240,0.520  
19,78.804,rs4263048,0.527  
19,78.812,rs2914354,0.522  
19,78.859,rs8109165,0.515  
19,78.880,rs4801974,0.529  
19,78.919,rs2052858,0.497  
19,78.949,rs7256991,0.483  
19,78.954,rs8104591,0.475  
19,79.003,rs11672485,0.434  
19,79.158,rs4801980,0.350  
19,79.245,rs10418296,0.318  
19,79.350,rs12979951,0.278  
19,79.376,rs11666558,0.279  
19,79.400,rs11668495,0.281  
19,79.485,rs4599028,0.284  
19,79.573,rs2708843,0.299  
19,79.628,rs4801988,0.303  
19,79.705,rs4994351,0.313  
19,79.749,rs4803143,0.316  
19,79.854,rs16985044,0.391  
19,79.947,rs17207187,0.503  
19,79.965,rs13344898,0.487  
19,79.975,rs4803150,0.470  
19,79.999,rs17305199,0.443  
19,80.042,rs8111919,0.457

19,80.052,rs4801994,0.464  
19,80.091,rs1293703,0.530  
19,80.205,rs4803160,0.526  
19,80.213,rs7258128,0.468  
19,80.252,rs8106416,0.466  
19,80.320,rs2116849,0.599  
19,80.341,rs4806712,0.684  
19,80.355,rs2619214,0.705  
19,80.377,rs3844453,0.687  
19,80.453,rs307934,0.698  
19,80.517,rs3745405,0.723  
19,80.653,rs7252013,0.646  
19,80.701,rs217541,0.614  
19,80.778,rs12150965,0.659  
19,80.796,rs10420331,0.659  
19,80.915,rs158196,0.640  
19,80.972,rs459247,0.667  
19,81.031,rs628258,0.692  
19,81.101,rs11667088,0.630  
19,81.124,rs612529,0.613  
19,81.156,rs654765,0.580  
19,81.164,rs11669029,0.572  
19,81.201,rs12985735,0.521  
19,81.210,rs10424816,0.516  
19,81.224,rs36643,0.475  
19,81.275,rs10416555,0.503  
19,81.293,rs36631,0.501  
19,81.304,rs28513,0.499  
19,81.313,rs17305311,0.457  
19,81.329,rs13353326,0.476  
19,81.372,rs422948,0.529  
19,81.378,rs2361797,0.540  
19,81.431,rs6509860,0.546  
19,81.442,rs410852,0.596  
19,81.454,rs7252525,0.634  
19,81.456,rs4806741,0.641  
19,81.494,rs1205315,0.499  
19,81.496,rs1205316,0.494  
19,81.503,rs1205322,0.466  
19,81.507,rs17836364,0.472  
19,81.510,rs2241384,0.513  
19,81.521,rs10418607,0.543  
19,81.528,rs2287824,0.558  
19,81.552,rs11084332,0.503  
19,81.608,rs13344319,0.513  
19,81.630,rs7255633,0.520  
19,81.705,rs2008238,0.520  
19,81.711,rs8108901,0.519  
19,81.730,rs8100732,0.531  
19,81.734,rs4806766,0.529  
19,81.757,rs6509882,0.512  
19,81.766,rs7255132,0.534  
19,81.779,rs1000320,0.563  
19,81.790,rs12975662,0.568  
19,81.853,rs272407,0.561  
19,81.868,rs2363863,0.558  
19,81.884,rs10411879,0.584  
19,81.904,rs272422,0.592  
19,81.918,rs8101605,0.613  
19,81.952,rs4806802,0.703  
19,81.953,rs1654668,0.706

19,81.956,rs731170,0.685  
19,81.958,rs760186,0.658  
19,81.967,rs1654656,0.570  
19,82.023,rs10423751,0.465  
19,82.024,rs6509899,0.464  
19,82.197,rs11672983,0.393  
19,82.234,rs2278427,0.397  
19,82.253,rs634742,0.391  
19,82.272,rs775883,0.309  
19,82.553,rs12768,0.302  
19,82.630,rs1654410,0.292  
19,82.802,rs10418743,0.327  
19,82.818,rs4806637,0.332  
19,82.955,rs1654466,0.365  
19,83.076,rs1054940,0.388  
19,83.174,rs2532060,0.361  
19,83.417,rs6509933,0.259  
19,83.419,rs3786867,0.259  
19,83.451,rs2288522,0.256  
19,83.451,rs2288520,0.256  
19,83.453,rs16986309,0.256  
19,83.593,rs4806654,0.257  
19,83.622,rs10403164,0.256  
19,83.758,rs11878562,0.227  
19,83.946,rs734517,0.202  
19,83.980,rs8105530,0.199  
19,84.123,rs11084396,0.180  
19,84.149,rs12976922,0.183  
19,84.296,rs17700376,0.176  
19,84.377,rs11669732,0.180  
19,84.669,rs8105272,0.156  
19,84.707,rs2303088,0.153  
19,84.734,rs4801655,0.143  
19,84.782,rs2864436,0.132  
19,84.993,rs542186,0.119  
19,85.198,rs2459744,0.153  
19,85.215,rs7250117,0.156  
19,85.284,rs6509945,0.163  
19,86.061,rs8105023,0.118  
19,86.138,rs10423927,0.120  
19,86.260,rs6509957,0.123  
19,86.449,rs4801628,0.125  
19,86.501,rs7249986,0.113  
19,86.562,rs299175,0.109  
19,86.564,rs7245988,0.108  
19,86.715,rs2616943,0.089  
19,86.819,rs7258704,0.089  
19,86.839,rs436488,0.089  
19,86.861,rs644733,0.077  
19,86.866,rs16986718,0.074  
19,86.874,rs9284431,0.069  
19,86.885,rs4801635,0.066  
19,86.889,rs12462372,0.066  
19,86.950,rs302445,0.060  
19,87.113,rs302837,0.039  
19,87.149,rs10405239,0.038  
19,87.308,rs9636113,0.037  
19,87.311,rs2043599,0.038  
19,87.445,rs1560693,0.042  
19,87.486,rs306487,0.043  
19,87.584,rs306450,0.047



19,87.685,rs7252935,0.045  
19,87.791,rs397977,0.034  
19,87.816,rs388295,0.026  
19,87.827,rs7247800,0.022  
19,87.916,rs7256266,0.027  
19,87.975,rs10409555,0.025  
19,88.015,rs7250549,0.024  
19,88.024,rs8104997,0.024  
19,88.031,rs2087115,0.025  
19,88.058,rs11665933,0.024  
19,88.080,rs6509981,0.025  
19,88.174,rs516022,0.033  
19,88.323,rs672824,0.041  
19,88.612,rs8108282,0.053  
19,88.728,rs10469312,0.078  
19,88.757,rs12709954,0.080  
19,88.895,rs10403345,0.085  
19,88.949,rs1036244,0.084  
19,89.182,rs1558357,0.088  
19,89.341,rs11084445,0.094  
19,89.650,rs2288858,0.088  
19,89.747,rs8101140,0.059  
19,89.759,rs9636161,0.087  
19,90.346,rs4801167,0.078  
19,90.500,rs3752176,0.080  
19,90.634,rs12609033,0.077  
19,90.639,rs1990575,0.077  
19,90.812,rs9917082,0.073  
19,90.843,rs2904241,0.072  
19,90.877,rs11881987,0.072  
19,90.899,rs10420820,0.073  
19,90.962,rs8105965,0.071  
19,90.982,rs714082,0.071  
19,91.025,rs2072501,0.070  
19,91.040,rs11878187,0.065  
19,91.090,rs1548866,0.038  
19,91.098,rs3795006,0.049  
19,91.193,rs1558355,0.033  
19,91.327,rs6510022,0.028  
19,91.392,rs8100664,0.020  
19,91.456,rs12974085,0.035  
19,91.487,rs4801408,0.035  
19,91.497,rs12971478,0.033  
19,91.534,rs7259756,0.037  
19,91.570,rs1433105,0.039  
19,91.614,rs11668315,0.048  
19,91.669,rs892168,0.057  
19,91.723,rs7259337,0.054  
19,91.734,rs10401795,0.054  
19,91.742,rs2902943,0.069  
19,91.917,rs10403926,0.080  
19,92.077,rs4801433,0.078  
19,92.373,rs10418480,0.052  
19,92.471,rs10411733,0.051  
19,92.766,rs8100796,0.039  
19,93.021,rs2285611,0.042  
19,93.203,rs10410631,0.040  
19,93.460,rs11879465,0.044  
19,93.835,rs7251603,0.052  
19,93.934,rs2303817,0.055  
19,94.844,rs1035522,0.087

19,95.192,rs4801552,0.142  
19,96.061,rs7248512,0.088  
19,96.132,rs260423,0.089  
19,96.230,rs48524,0.091  
19,96.518,rs7253055,0.110  
19,96.608,rs931258,0.120  
19,96.650,rs3915790,0.128  
19,96.950,rs3830,0.111  
19,97.152,rs8100801,0.121  
19,97.409,rs2278498,0.133  
19,98.623,rs11666790,0.146  
20,0.280,rs6139074,0.180  
20,0.429,rs722829,0.181  
20,0.941,rs513522,0.212  
20,1.146,rs6048226,0.208  
20,1.169,rs6082956,0.208  
20,1.297,rs6050276,0.218  
20,1.377,rs6051321,0.227  
20,1.422,rs2092473,0.222  
20,1.510,rs6037430,0.209  
20,1.526,rs6051492,0.207  
20,1.534,rs6084217,0.210  
20,1.566,rs742605,0.220  
20,1.613,rs6139007,0.224  
20,1.671,rs12626158,0.162  
20,1.929,rs2295495,0.156  
20,2.016,rs6052047,0.153  
20,2.020,rs6037660,0.153  
20,2.240,rs459012,0.144  
20,2.569,rs6107514,0.136  
20,2.665,rs204694,0.146  
20,2.738,rs2316866,0.126  
20,2.786,rs6139653,0.139  
20,2.823,rs6116745,0.123  
20,2.836,rs282162,0.116  
20,2.855,rs3761308,0.122  
20,2.898,rs6139752,0.104  
20,2.950,rs911448,0.082  
20,3.047,rs6053635,0.066  
20,3.085,rs6107696,0.056  
20,3.157,rs6053783,0.039  
20,3.171,rs6107716,0.038  
20,3.418,rs6085469,0.023  
20,3.461,rs6139971,0.022  
20,3.487,rs873544,0.026  
20,3.509,rs1114734,0.032  
20,3.536,rs6117279,0.035  
20,3.560,rs6085580,0.047  
20,3.674,rs1884639,0.040  
20,3.788,rs16992822,0.031  
20,3.837,rs3746804,0.027  
20,3.854,rs2024896,0.025  
20,3.892,rs4815961,0.024  
20,3.899,rs668988,0.024  
20,3.909,rs13045384,0.025  
20,4.084,rs592954,0.048  
20,4.099,rs6077185,0.047  
20,4.361,rs552367,0.034  
20,4.434,rs12625746,0.028  
20,4.560,rs1888087,0.020  
20,4.673,rs6086361,0.017

20,4.695,rs4816051,0.016  
20,4.787,rs742922,0.009  
20,4.830,rs6055803,0.013  
20,4.834,rs910389,0.008  
20,4.835,rs524765,0.007  
20,4.838,rs1014897,0.009  
20,4.842,rs478451,0.011  
20,4.900,rs1997924,0.009  
20,5.051,rs533747,0.017  
20,5.085,rs480789,0.005  
20,5.098,rs6056182,0.005  
20,5.220,rs2317321,0.004  
20,5.436,rs6056558,0.010  
20,5.530,rs6140951,0.011  
20,5.611,rs11696364,0.019  
20,5.732,rs6118727,0.003  
20,5.792,rs761857,0.002  
20,5.810,rs6057063,0.002  
20,5.824,rs6042507,0.004  
20,5.860,rs715217,0.006  
20,5.923,rs976192,0.012  
20,6.034,rs2250091,0.013  
20,6.315,rs6110838,0.015  
20,6.414,rs6111045,0.017  
20,6.471,rs202516,0.017  
20,6.585,rs202490,0.014  
20,6.637,rs200885,0.015  
20,6.700,rs200891,0.019  
20,6.790,rs156330,0.020  
20,6.818,rs7361808,0.026  
20,6.892,rs6045210,0.035  
20,6.924,rs1884565,0.040  
20,6.969,rs6075340,0.046  
20,7.019,rs6105944,0.052  
20,7.029,rs3790341,0.054  
20,7.029,rs3828016,0.054  
20,7.030,rs2235745,0.054  
20,7.395,rs2206699,0.023  
20,7.486,rs16980553,0.019  
20,7.514,rs6046274,0.028  
20,7.563,rs6046419,0.029  
20,7.889,rs6035745,0.075  
20,7.976,rs6075784,0.066  
20,7.993,rs6035842,0.066  
20,8.036,rs6082420,0.070  
20,8.122,rs6082497,0.069  
20,8.201,rs6047800,0.082  
20,8.227,rs8116927,0.079  
20,8.337,rs214814,0.067  
20,8.368,rs6036147,0.064  
20,8.372,rs6113720,0.064  
20,8.383,rs2076408,0.067  
20,8.403,rs214828,0.101  
20,8.457,rs2422707,0.102  
20,8.492,rs2179463,0.103  
20,8.560,rs6048587,0.089  
20,8.677,rs2076650,0.085  
20,8.868,rs4815270,0.127  
20,8.889,rs6114605,0.134  
20,8.912,rs6083505,0.128  
20,8.951,rs6083536,0.113

20,9.157,rs6115073,0.113  
20,9.189,rs6037081,0.113  
20,9.300,rs6083911,0.120  
20,9.338,rs2422821,0.125  
20,9.406,rs6051098,0.131  
20,9.435,rs6037336,0.136  
20,9.589,rs16990611,0.131  
20,9.664,rs215519,0.126  
20,9.719,rs215543,0.126  
20,10.239,rs3746692,0.131  
20,10.297,rs615568,0.131  
20,10.374,rs8184236,0.126  
20,10.403,rs3761248,0.117  
20,10.416,rs4813627,0.116  
20,10.480,rs857242,0.111  
20,10.489,rs11087565,0.116  
20,10.498,rs864140,0.122  
20,10.506,rs12480378,0.120  
20,10.515,rs6115792,0.119  
20,10.580,rs6084276,0.113  
20,10.865,rs979332,0.067  
20,10.910,rs6076524,0.070  
20,11.233,rs235517,0.080  
20,11.246,rs170974,0.080  
20,11.284,rs6051989,0.077  
20,11.338,rs2670314,0.074  
20,11.405,rs656635,0.082  
20,11.421,rs3746638,0.093  
20,11.435,rs6139180,0.098  
20,11.462,rs735710,0.086  
20,11.505,rs580502,0.075  
20,11.560,rs2295343,0.065  
20,11.593,rs683808,0.066  
20,11.673,rs2295348,0.073  
20,11.680,rs4813643,0.073  
20,11.776,rs6116065,0.083  
20,12.087,rs998132,0.096  
20,12.155,rs2143234,0.094  
20,12.210,rs6052257,0.090  
20,12.258,rs6139278,0.085  
20,12.296,rs945763,0.085  
20,12.326,rs2027236,0.083  
20,12.406,rs1741295,0.073  
20,12.413,rs6052378,0.060  
20,12.428,rs1741283,0.070  
20,12.434,rs1741285,0.075  
20,12.463,rs945772,0.073  
20,12.561,rs6084657,0.063  
20,12.574,rs2027237,0.063  
20,12.589,rs1217369,0.063  
20,12.606,rs6116265,0.061  
20,12.745,rs6107436,0.043  
20,12.874,rs4110508,0.028  
20,12.913,rs513783,0.021  
20,12.943,rs3912089,0.014  
20,13.037,rs3904864,0.015  
20,13.070,rs46593,0.014  
20,13.100,rs10485512,0.013  
20,13.161,rs297672,0.010  
20,13.203,rs6116375,0.008  
20,13.210,rs6133125,0.008

20,13.477,rs911165,0.001  
20,13.617,rs6052674,0.000  
20,13.650,rs6139494,-0.001  
20,13.664,rs961197,-0.001  
20,13.745,rs6037908,-0.001  
20,13.817,rs6116466,-0.000  
20,13.890,rs6052761,0.000  
20,13.921,rs2756271,0.000  
20,14.033,rs6052787,-0.002  
20,14.070,rs2245220,-0.002  
20,14.078,rs11087655,-0.002  
20,14.216,rs2422951,-0.002  
20,14.267,rs1535380,-0.004  
20,14.280,rs2422975,-0.004  
20,14.286,rs3746674,-0.004  
20,14.319,rs1998292,-0.006  
20,14.338,rs2281639,-0.008  
20,14.373,rs6084900,-0.013  
20,14.389,rs2423032,-0.014  
20,14.401,rs1885306,-0.014  
20,14.412,rs13039769,-0.014  
20,14.483,rs2423067,-0.018  
20,14.514,rs6084910,-0.022  
20,14.543,rs1131382,-0.020  
20,14.565,rs6107541,-0.019  
20,14.618,rs1110277,-0.016  
20,14.780,rs1715364,-0.010  
20,14.807,rs1776972,-0.010  
20,14.883,rs1776947,-0.010  
20,14.962,rs2748901,-0.013  
20,15.082,rs13042903,-0.012  
20,15.149,rs8126456,-0.013  
20,15.242,rs404678,-0.010  
20,15.330,rs4815763,-0.007  
20,15.361,rs6038058,-0.006  
20,15.609,rs6107581,-0.001  
20,15.614,rs2423089,-0.001  
20,15.757,rs6107589,-0.000  
20,15.796,rs10485483,-0.000  
20,15.821,rs6053181,-0.000  
20,16.096,rs6076792,-0.000  
20,16.323,rs910970,-0.000  
20,16.578,rs6085118,0.000  
20,16.788,rs11697998,0.001  
20,16.862,rs6053374,0.002  
20,17.037,rs574755,0.003  
20,17.148,rs6053422,0.003  
20,17.265,rs6116807,0.000  
20,17.280,rs2423094,0.000  
20,17.283,rs6053445,0.001  
20,17.288,rs6139748,0.001  
20,17.455,rs6053465,0.003  
20,17.819,rs16991130,0.002  
20,17.985,rs6038219,0.000  
20,18.272,rs805751,-0.000  
20,18.441,rs805770,-0.001  
20,18.599,rs805745,0.000  
20,18.640,rs805743,0.000  
20,18.683,rs6085252,0.000  
20,18.742,rs1546478,-0.000  
20,18.868,rs6053640,-0.003

20,18.876,rs2003017,-0.003  
20,19.022,rs6107683,-0.007  
20,19.080,rs4815851,-0.012  
20,19.487,rs1555141,-0.010  
20,19.498,rs6053718,-0.010  
20,19.534,rs4815864,-0.008  
20,19.535,rs966534,-0.008  
20,19.730,rs6133268,-0.004  
20,19.902,rs6139850,-0.001  
20,19.903,rs237084,-0.001  
20,19.945,rs6076879,0.003  
20,19.952,rs1699233,0.005  
20,19.955,rs1699230,0.005  
20,19.987,rs6038317,0.002  
20,20.014,rs988036,0.000  
20,20.066,rs381571,-0.000  
20,20.100,rs236114,-0.000  
20,20.195,rs6133280,-0.001  
20,20.230,rs6117041,-0.001  
20,20.305,rs6053889,-0.002  
20,20.315,rs749922,-0.002  
20,20.392,rs6053925,-0.001  
20,20.505,rs6053961,-0.000  
20,20.618,rs6038400,0.000  
20,20.624,rs7354540,0.000  
20,20.792,rs6076985,0.003  
20,20.840,rs2148815,0.003  
20,20.934,rs953420,0.002  
20,20.961,rs6054264,0.002  
20,21.331,rs984677,0.000  
20,21.378,rs2143712,-0.000  
20,21.386,rs2206920,-0.000  
20,21.402,rs2206922,-0.000  
20,21.431,rs6085661,-0.000  
20,21.445,rs235710,-0.000  
20,21.479,rs1980499,-0.000  
20,21.604,rs235753,0.000  
20,21.614,rs6054517,0.000  
20,21.727,rs235725,0.000  
20,21.762,rs6054529,0.000  
20,21.891,rs6038617,-0.000  
20,21.957,rs6038621,-0.001  
20,22.014,rs1392625,-0.001  
20,22.101,rs1028394,-0.004  
20,22.346,rs6085732,-0.010  
20,22.481,rs7263691,-0.009  
20,23.084,rs2225265,-0.010  
20,23.253,rs1005351,-0.007  
20,24.010,rs4813818,-0.010  
20,24.204,rs6054856,-0.036  
20,24.273,rs10485715,-0.038  
20,24.399,rs971226,-0.041  
20,24.439,rs6054963,-0.041  
20,24.557,rs7263704,-0.038  
20,24.557,rs6055075,-0.038  
20,24.602,rs4816009,-0.047  
20,24.825,rs6077242,-0.043  
20,24.951,rs2294551,-0.044  
20,25.602,rs2423334,-0.066  
20,25.772,rs6038995,-0.076  
20,25.778,rs1058029,-0.076

20,25.919,rs6039004,-0.076  
20,26.176,rs6118062,-0.077  
20,26.239,rs6039040,-0.075  
20,26.267,rs4142365,-0.080  
20,26.356,rs978266,-0.083  
20,26.468,rs2423354,-0.072  
20,26.605,rs2179138,-0.077  
20,26.700,rs6133564,-0.096  
20,26.774,rs2745755,-0.112  
20,26.804,rs6140595,-0.123  
20,27.031,rs708925,-0.187  
20,27.322,rs4471960,-0.190  
20,27.366,rs2327070,-0.185  
20,27.442,rs6140629,-0.194  
20,27.514,rs2143205,-0.173  
20,27.538,rs1040496,-0.096  
20,27.568,rs926505,-0.083  
20,27.593,rs6056198,-0.072  
20,27.667,rs4295085,-0.068  
20,27.696,rs6133641,-0.074  
20,27.733,rs226191,-0.082  
20,27.789,rs6140833,-0.112  
20,27.812,rs6108249,-0.126  
20,27.901,rs6118505,-0.125  
20,27.949,rs6086799,-0.124  
20,28.084,rs5011374,-0.121  
20,28.209,rs6140909,-0.109  
20,28.294,rs6077510,-0.099  
20,28.482,rs16995800,-0.104  
20,28.676,rs4369940,-0.114  
20,28.819,rs6086904,-0.109  
20,28.909,rs8117167,-0.130  
20,28.914,rs926475,-0.120  
20,29.113,rs6140971,-0.175  
20,29.177,rs928366,-0.190  
20,29.202,rs219861,-0.194  
20,29.235,rs6039529,-0.199  
20,29.343,rs2423395,-0.213  
20,29.517,rs2423438,-0.251  
20,29.605,rs2423462,-0.298  
20,29.637,rs4566434,-0.297  
20,29.696,rs6056871,-0.290  
20,29.712,rs6056875,-0.288  
20,29.802,rs6118746,-0.275  
20,29.905,rs221007,-0.257  
20,30.029,rs6087052,-0.244  
20,30.068,rs6057009,-0.238  
20,30.195,rs4813906,-0.193  
20,30.246,rs6057057,-0.164  
20,30.314,rs2064658,-0.193  
20,30.343,rs4816196,-0.173  
20,30.347,rs6118852,-0.173  
20,30.512,rs674630,-0.173  
20,30.568,rs551927,-0.229  
20,30.604,rs6133794,-0.222  
20,30.649,rs6077654,-0.246  
20,30.709,rs13044468,-0.276  
20,30.716,rs594240,-0.286  
20,30.755,rs2210585,-0.346  
20,30.779,rs4813918,-0.434  
20,30.826,rs6077681,-0.433

20,30.909,rs6039763,-0.415  
20,30.967,rs6032826,-0.415  
20,31.077,rs6074113,-0.392  
20,31.132,rs6077718,-0.367  
20,31.148,rs2284300,-0.372  
20,31.230,rs6077729,-0.390  
20,31.273,rs362614,-0.391  
20,31.301,rs6133869,-0.399  
20,31.379,rs2327290,-0.423  
20,31.537,rs16991555,-0.425  
20,31.559,rs6108571,-0.422  
20,31.888,rs12106093,-0.365  
20,32.156,rs8708,-0.316  
20,32.218,rs6040061,-0.300  
20,32.222,rs3748478,-0.299  
20,32.247,rs910118,-0.293  
20,32.288,rs6077892,-0.282  
20,32.290,rs2423516,-0.251  
20,32.293,rs6040109,-0.248  
20,32.302,rs6040118,-0.241  
20,32.310,rs1022790,-0.248  
20,32.321,rs6108695,-0.242  
20,32.346,rs6104663,-0.234  
20,32.367,rs2423523,-0.241  
20,32.412,rs1884136,-0.292  
20,32.424,rs6040218,-0.301  
20,32.443,rs4813040,-0.326  
20,32.453,rs1232587,-0.335  
20,32.480,rs6077977,-0.362  
20,32.501,rs4813949,-0.373  
20,32.510,rs1887320,-0.373  
20,32.787,rs1028846,-0.374  
20,32.793,rs11905962,-0.374  
20,32.815,rs6033014,-0.379  
20,33.039,rs761569,-0.346  
20,33.249,rs2423539,-0.334  
20,33.455,rs11698505,-0.331  
20,33.663,rs12624835,-0.339  
20,34.001,rs6108837,-0.421  
20,34.171,rs1028479,-0.393  
20,34.208,rs2327340,-0.420  
20,34.457,rs2143861,-0.447  
20,34.580,rs6040442,-0.430  
20,34.623,rs2224184,-0.453  
20,34.635,rs4814019,-0.449  
20,34.705,rs6104773,-0.407  
20,34.713,rs6131239,-0.402  
20,34.748,rs2175785,-0.375  
20,34.891,rs982920,-0.430  
20,35.010,rs6074345,-0.447  
20,35.220,rs3177118,-0.469  
20,35.269,rs6040997,-0.447  
20,35.308,rs10485751,-0.431  
20,35.312,rs6109223,-0.429  
20,35.323,rs6131295,-0.431  
20,35.334,rs6041037,-0.434  
20,35.336,rs2206801,-0.429  
20,35.336,rs2327592,-0.429  
20,35.347,rs1997810,-0.396  
20,35.359,rs6033284,-0.398  
20,35.385,rs6514240,-0.401



20,35.463,rs735349,-0.410  
20,35.531,rs6078495,-0.359  
20,35.539,rs4496385,-0.360  
20,35.556,rs4813081,-0.362  
20,35.596,rs6041271,-0.342  
20,35.633,rs2208981,-0.292  
20,35.657,rs6041318,-0.290  
20,35.675,rs6074422,-0.296  
20,35.722,rs6041385,-0.307  
20,35.870,rs6109480,-0.298  
20,35.990,rs7274881,-0.328  
20,36.107,rs6134608,-0.323  
20,36.120,rs6104941,-0.325  
20,36.145,rs6109515,-0.286  
20,36.168,rs10485760,-0.318  
20,36.172,rs1452321,-0.323  
20,36.215,rs6134632,-0.329  
20,36.315,rs1333400,-0.311  
20,36.381,rs6033504,-0.320  
20,36.449,rs6104966,-0.299  
20,36.509,rs11087039,-0.271  
20,36.568,rs845575,-0.251  
20,36.639,rs1099620,-0.266  
20,36.716,rs845611,-0.281  
20,36.752,rs6033531,-0.287  
20,36.800,rs2423712,-0.297  
20,36.841,rs3898706,-0.333  
20,36.847,rs13045508,-0.333  
20,36.904,rs6041737,-0.329  
20,36.908,rs433279,-0.328  
20,36.995,rs6041768,-0.324  
20,37.072,rs243881,-0.321  
20,37.149,rs6074558,-0.273  
20,37.159,rs6105042,-0.271  
20,37.178,rs6041890,-0.301  
20,37.252,rs4642012,-0.319  
20,37.378,rs6134838,-0.335  
20,37.386,rs6033654,-0.337  
20,37.390,rs11907045,-0.331  
20,37.393,rs6041977,-0.330  
20,37.402,rs6041981,-0.329  
20,37.413,rs17191004,-0.319  
20,37.419,rs6109797,-0.316  
20,37.423,rs6078976,-0.322  
20,37.451,rs653215,-0.347  
20,37.452,rs17263187,-0.349  
20,37.507,rs6042033,-0.442  
20,37.650,rs6042171,-0.435  
20,37.682,rs2057258,-0.426  
20,37.725,rs6042307,-0.493  
20,37.726,rs6079136,-0.495  
20,37.730,rs6131512,-0.494  
20,37.771,rs2064644,-0.474  
20,37.777,rs2423757,-0.476  
20,37.809,rs7274524,-0.482  
20,37.842,rs6074674,-0.488  
20,37.891,rs7273854,-0.496  
20,37.914,rs7265754,-0.500  
20,37.971,rs6079395,-0.541  
20,37.983,rs6033955,-0.487  
20,37.997,rs6079423,-0.471

20,38.027,rs2327854,-0.482  
20,38.027,rs6135159,-0.482  
20,38.044,rs1015581,-0.528  
20,38.044,rs1475348,-0.529  
20,38.046,rs2423812,-0.529  
20,38.114,rs6079540,-0.587  
20,38.188,rs2423846,-0.610  
20,38.199,rs353147,-0.613  
20,38.438,rs6110510,-0.694  
20,38.468,rs435532,-0.644  
20,38.627,rs6074843,-0.638  
20,38.751,rs432033,-0.646  
20,39.076,rs175259,-0.509  
20,39.210,rs458032,-0.472  
20,39.371,rs2423922,-0.429  
20,39.455,rs6135395,-0.397  
20,39.496,rs6079790,-0.382  
20,39.502,rs1013916,-0.381  
20,39.539,rs433059,-0.359  
20,39.542,rs399698,-0.325  
20,39.559,rs6074887,-0.330  
20,39.625,rs6043261,-0.322  
20,39.631,rs971731,-0.321  
20,39.684,rs379166,-0.303  
20,39.714,rs4814371,-0.306  
20,39.868,rs2423963,-0.294  
20,39.896,rs6135414,-0.299  
20,40.153,rs6135425,-0.317  
20,40.205,rs6074909,-0.318  
20,40.429,rs1035177,-0.325  
20,40.514,rs2876410,-0.347  
20,40.547,rs6079890,-0.352  
20,40.552,rs409303,-0.383  
20,40.554,rs6079891,-0.386  
20,40.557,rs367114,-0.370  
20,40.572,rs6079894,-0.370  
20,40.633,rs7265729,-0.353  
20,41.170,rs459928,-0.359  
20,41.198,rs2021915,-0.349  
20,41.364,rs6079926,-0.315  
20,41.558,rs6043448,-0.297  
20,41.599,rs6079936,-0.298  
20,41.608,rs12624386,-0.299  
20,41.609,rs4813189,-0.299  
20,41.738,rs6135558,-0.320  
20,41.781,rs17634776,-0.316  
20,41.789,rs6074958,-0.317  
20,41.842,rs6135591,-0.314  
20,41.951,rs8124934,-0.335  
20,41.957,rs6043648,-0.336  
20,41.967,rs6043659,-0.337  
20,41.985,rs6043663,-0.339  
20,41.998,rs775112,-0.361  
20,42.038,rs6135650,-0.450  
20,42.044,rs6034358,-0.461  
20,42.051,rs6080106,-0.523  
20,42.077,rs16997071,-0.532  
20,42.085,rs775146,-0.531  
20,42.117,rs6105524,-0.517  
20,42.227,rs1329820,-0.477  
20,42.240,rs6080167,-0.468

20,42.274,rs6043813,-0.453  
20,42.277,rs4814456,-0.452  
20,42.313,rs1541065,-0.497  
20,42.439,rs6111060,-0.505  
20,42.563,rs761901,-0.537  
20,42.605,rs4814499,-0.541  
20,42.658,rs8123698,-0.534  
20,42.668,rs2295115,-0.532  
20,42.805,rs2277777,-0.524  
20,43.062,rs12329492,-0.544  
20,43.471,rs6080335,-0.571  
20,43.572,rs1885578,-0.565  
20,43.608,rs6044228,-0.577  
20,43.685,rs2206654,-0.502  
20,43.702,rs11907513,-0.503  
20,43.750,rs3171297,-0.502  
20,43.754,rs4813245,-0.516  
20,43.767,rs6075101,-0.549  
20,43.790,rs6080397,-0.473  
20,43.801,rs10084490,-0.418  
20,43.808,rs6044299,-0.417  
20,43.960,rs6044410,-0.382  
20,44.033,rs6044461,-0.359  
20,44.067,rs997424,-0.315  
20,44.184,rs991747,-0.330  
20,44.335,rs4814579,-0.315  
20,44.412,rs8116679,-0.319  
20,44.415,rs6044739,-0.320  
20,44.502,rs16999097,-0.360  
20,44.525,rs6075207,-0.372  
20,44.535,rs8115774,-0.381  
20,44.615,rs6044850,-0.455  
20,44.626,rs2023509,-0.454  
20,44.626,rs6034837,-0.454  
20,44.632,rs6080726,-0.455  
20,44.669,rs201933,-0.464  
20,44.715,rs6044891,-0.501  
20,44.782,rs3790325,-0.507  
20,44.795,rs6044930,-0.516  
20,44.930,rs2296903,-0.490  
20,44.931,rs4814640,-0.490  
20,44.968,rs2077520,-0.492  
20,45.163,rs2143543,-0.514  
20,45.187,rs6045032,-0.492  
20,45.254,rs2328223,-0.434  
20,45.264,rs6136213,-0.427  
20,45.284,rs6111714,-0.415  
20,45.311,rs6105830,-0.394  
20,45.338,rs2618647,-0.373  
20,45.339,rs2618648,-0.373  
20,45.409,rs6045109,-0.377  
20,45.414,rs11697158,-0.375  
20,45.624,rs6080941,-0.350  
20,45.719,rs6045177,-0.405  
20,45.781,rs1124933,-0.458  
20,45.965,rs1884104,-0.469  
20,46.031,rs2424126,-0.473  
20,46.193,rs6045357,-0.484  
20,46.367,rs2424205,-0.499  
20,46.842,rs13037428,-0.544  
20,46.940,rs6081382,-0.485

20,46.949,rs6105966,-0.479  
20,46.966,rs8120864,-0.468  
20,47.092,rs2876503,-0.449  
20,47.103,rs6045689,-0.451  
20,47.200,rs7262069,-0.503  
20,47.218,rs6045728,-0.507  
20,47.248,rs6132146,-0.456  
20,47.370,rs6136614,-0.431  
20,47.409,rs13043431,-0.407  
20,47.430,rs6132158,-0.399  
20,47.456,rs6075475,-0.376  
20,47.495,rs1885623,-0.386  
20,47.794,rs8114946,-0.462  
20,47.813,rs6046009,-0.467  
20,47.952,rs6081598,-0.522  
20,48.013,rs3790221,-0.558  
20,48.059,rs6112418,-0.575  
20,48.076,rs6081622,-0.580  
20,48.163,rs2328412,-0.587  
20,48.193,rs3790267,-0.602  
20,48.239,rs4589832,-0.625  
20,48.273,rs6046215,-0.642  
20,48.298,rs1406968,-0.573  
20,48.324,rs11087290,-0.588  
20,48.340,rs3790286,-0.598  
20,48.473,rs808716,-0.617  
20,48.673,rs6035459,-0.616  
20,48.710,rs6046391,-0.561  
20,48.744,rs6136870,-0.520  
20,48.785,rs6106154,-0.466  
20,48.839,rs1040577,-0.369  
20,48.840,rs16981318,-0.368  
20,48.858,rs16981330,-0.352  
20,48.864,rs199541,-0.348  
20,48.889,rs13039938,-0.330  
20,48.900,rs1876813,-0.323  
20,48.916,rs6112690,-0.312  
20,48.930,rs2328472,-0.306  
20,48.961,rs199579,-0.298  
20,49.134,rs2255255,-0.247  
20,49.175,rs6136936,-0.249  
20,49.215,rs926644,-0.253  
20,49.258,rs6081877,-0.261  
20,49.395,rs6081901,-0.278  
20,49.604,rs6046759,-0.246  
20,49.633,rs2424303,-0.257  
20,49.666,rs6075637,-0.303  
20,49.688,rs6035596,-0.304  
20,49.723,rs2424339,-0.311  
20,49.816,rs6046805,-0.376  
20,49.867,rs6046818,-0.372  
20,49.922,rs6137015,-0.368  
20,49.953,rs6106244,-0.373  
20,50.352,rs1210347,-0.385  
20,50.942,rs17718943,-0.350  
20,50.942,rs6035704,-0.350  
20,51.016,rs963487,-0.333  
20,51.380,rs4815007,-0.272  
20,51.467,rs804531,-0.313  
20,51.902,rs172038,-0.281  
20,51.949,rs2757072,-0.277

20,52.063,rs17753678,-0.268  
20,52.084,rs1415816,-0.266  
20,52.101,rs6082726,-0.295  
20,52.291,rs11907070,-0.302  
20,52.553,rs6082843,-0.312  
20,52.554,rs11907005,-0.326  
20,52.555,rs6048352,-0.343  
20,52.556,rs6082845,-0.343  
20,52.596,rs6048374,-0.314  
20,52.624,rs6137770,-0.305  
20,52.706,rs6048420,-0.327  
20,52.870,rs11696756,-0.315  
20,52.889,rs2424502,-0.314  
20,52.924,rs2567609,-0.300  
20,53.069,rs6113954,-0.249  
20,53.298,rs11697315,-0.198  
20,53.314,rs6137886,-0.196  
20,53.346,rs6048703,-0.194  
20,53.443,rs2253834,-0.174  
20,53.511,rs1028523,-0.170  
20,53.639,rs2983640,-0.155  
20,53.674,rs13040731,-0.149  
20,53.696,rs6049003,-0.145  
20,53.699,rs8123755,-0.144  
20,53.729,rs2070856,-0.127  
20,53.786,rs6083297,-0.114  
20,53.809,rs1799841,-0.108  
20,53.839,rs2260409,-0.106  
20,53.868,rs755032,-0.111  
20,53.910,rs6114429,-0.108  
20,53.913,rs3905230,-0.107  
20,53.944,rs6049391,-0.127  
20,53.972,rs6049428,-0.127  
20,54.088,rs6049586,-0.115  
20,54.089,rs6076221,-0.115  
20,54.142,rs6076225,-0.115  
20,54.185,rs6114708,-0.112  
20,54.226,rs6114735,-0.102  
20,54.233,rs6049713,-0.101  
20,54.252,rs6049735,-0.099  
20,54.255,rs16986675,-0.099  
20,54.301,rs6138318,-0.096  
20,54.306,rs6036836,-0.099  
20,54.323,rs1409371,-0.109  
20,54.376,rs6106915,-0.096  
20,54.397,rs6114812,-0.092  
20,54.413,rs6076248,-0.090  
20,54.438,rs4815299,-0.089  
20,54.531,rs226664,-0.089  
20,54.579,rs8119131,-0.093  
20,54.764,rs6050255,-0.100  
20,54.776,rs2144371,-0.094  
20,54.800,rs4813547,-0.085  
20,54.804,rs6083776,-0.084  
20,54.806,rs13038092,-0.084  
20,54.810,rs6115178,-0.084  
20,54.815,rs6132850,-0.084  
20,55.298,rs6088901,-0.096  
20,55.315,rs12479885,-0.097  
20,55.373,rs2233832,-0.093  
20,55.413,rs6058012,-0.087

20,55.561,rs6121302,-0.057  
20,55.590,rs6061085,-0.054  
20,56.257,rs6087948,-0.125  
20,56.268,rs456798,-0.126  
20,56.470,rs6058894,-0.130  
20,56.651,rs17123911,-0.140  
20,56.664,rs6088055,-0.140  
20,56.705,rs6119316,-0.136  
20,56.759,rs378098,-0.128  
20,56.789,rs11696307,-0.126  
20,56.818,rs6088116,-0.112  
20,56.924,rs3818222,-0.134  
20,57.024,rs6088177,-0.157  
20,57.074,rs910397,-0.138  
20,57.079,rs2747565,-0.118  
20,57.082,rs17405840,-0.133  
20,57.084,rs4911134,-0.131  
20,57.086,rs6057924,-0.130  
20,57.115,rs1205340,-0.111  
20,57.167,rs6088727,-0.115  
20,57.180,rs4911494,-0.109  
20,57.427,rs6060612,-0.110  
20,57.676,rs6141600,-0.091  
20,57.782,rs2425193,-0.084  
20,57.861,rs4239689,-0.079  
20,57.909,rs6103072,-0.076  
20,57.937,rs906466,-0.073  
20,57.943,rs2425256,-0.072  
20,58.143,rs6129459,-0.100  
20,58.342,rs1146261,-0.071  
20,58.440,rs6029941,-0.058  
20,59.282,rs11700106,-0.044  
20,59.371,rs1073768,-0.041  
20,59.483,rs6104528,-0.029  
20,59.565,rs6018027,-0.019  
20,59.570,rs6063022,-0.019  
20,59.593,rs12329503,-0.017  
20,59.690,rs11086214,-0.019  
20,59.711,rs4809641,-0.019  
20,59.712,rs8114302,-0.019  
20,59.740,rs6125111,-0.019  
20,59.856,rs6019196,-0.021  
20,59.980,rs6063367,-0.024  
20,60.036,rs198498,-0.024  
20,60.050,rs198490,-0.024  
20,60.222,rs6067491,-0.027  
20,60.243,rs6020712,-0.027  
20,60.316,rs1076664,-0.025  
20,60.501,rs6096822,-0.019  
20,60.551,rs6021960,-0.017  
20,60.587,rs16987050,-0.017  
20,60.602,rs8115683,-0.017  
20,60.632,rs6013590,-0.018  
20,60.694,rs6022419,-0.018  
20,60.745,rs6091845,-0.014  
20,60.774,rs6023939,-0.013  
20,60.801,rs6064324,-0.007  
20,60.803,rs6014601,-0.006  
20,60.808,rs1341021,-0.003  
20,60.818,rs2022499,-0.001  
20,60.885,rs13043114,-0.003

20,60.907,rs1005611,-0.004  
20,60.914,rs8123363,-0.004  
20,60.925,rs6070933,-0.005  
20,60.943,rs6015693,-0.004  
20,60.948,rs911719,-0.004  
20,60.989,rs1006945,-0.008  
20,61.010,rs731671,-0.016  
20,61.082,rs6016010,-0.021  
20,61.091,rs17764371,-0.022  
20,61.103,rs2868504,-0.022  
20,61.215,rs13036738,-0.018  
20,61.247,rs4812398,-0.017  
20,61.816,rs292858,-0.032  
20,62.020,rs6071808,-0.036  
20,62.277,rs2145943,-0.043  
20,62.331,rs6129451,-0.043  
20,62.364,rs12479923,-0.048  
20,62.385,rs6124202,-0.051  
20,62.466,rs6071905,-0.061  
20,62.478,rs6028809,-0.061  
20,62.610,rs6101843,-0.055  
20,62.825,rs1406967,-0.036  
20,62.891,rs6071980,-0.045  
20,62.900,rs6101922,-0.038  
20,62.962,rs6029006,-0.031  
20,62.966,rs6101934,-0.031  
20,63.240,rs3092155,-0.003  
20,63.253,rs6016361,-0.003  
20,63.256,rs6016373,-0.003  
20,63.262,rs17820943,-0.002  
20,63.263,rs6072090,-0.002  
20,63.264,rs6016412,-0.003  
20,63.269,rs10485676,-0.010  
20,63.270,rs6029326,-0.012  
20,63.272,rs1883700,-0.012  
20,63.272,rs6029356,-0.022  
20,63.276,rs4142346,-0.050  
20,63.276,rs6029424,-0.057  
20,63.278,rs6093408,-0.054  
20,63.279,rs3092685,-0.052  
20,63.280,rs2425460,-0.052  
20,63.921,rs2143229,-0.028  
20,64.004,rs6102453,-0.025  
20,64.630,rs4810337,-0.006  
20,64.965,rs6029852,-0.005  
20,65.122,rs2425464,-0.011  
20,65.129,rs2050083,-0.011  
20,65.135,rs3092525,-0.011  
20,65.139,rs926478,-0.011  
20,65.156,rs4812562,-0.011  
20,65.166,rs6016647,-0.011  
20,65.170,rs6029893,-0.011  
20,65.227,rs6029911,-0.010  
20,65.369,rs6130019,-0.007  
20,65.408,rs2144009,-0.006  
20,65.445,rs746413,-0.006  
20,65.870,rs6016732,-0.001  
20,65.894,rs6030107,-0.001  
20,65.935,rs1016071,-0.001  
20,65.955,rs6072680,-0.002  
20,65.993,rs6030140,-0.004

20,65.999,rs2227158,-0.004  
20,66.018,rs6016752,-0.005  
20,66.021,rs6072689,-0.005  
20,66.050,rs6016759,-0.005  
20,66.064,rs6102805,-0.004  
20,66.096,rs1003576,-0.009  
20,66.115,rs7262535,-0.010  
20,66.144,rs6016775,-0.011  
20,66.237,rs6130130,-0.018  
20,66.398,rs6030295,-0.020  
20,66.433,rs6030328,-0.021  
20,66.441,rs764444,-0.018  
20,66.442,rs6065517,-0.018  
20,66.450,rs4611702,-0.015  
20,66.468,rs6016864,-0.014  
20,66.493,rs17811221,-0.018  
20,66.496,rs733977,-0.017  
20,66.498,rs2038668,-0.017  
20,66.515,rs176380,-0.019  
20,66.528,rs176379,-0.018  
20,66.532,rs6065547,-0.018  
20,66.533,rs208262,-0.018  
20,66.537,rs208270,-0.018  
20,66.550,rs535000,-0.018  
20,67.043,rs16987990,-0.019  
20,67.250,rs4239695,-0.018  
20,67.732,rs4142387,-0.017  
20,68.130,rs4812713,-0.016  
20,68.169,rs4812716,-0.016  
20,68.236,rs743998,-0.026  
20,68.245,rs3135415,-0.039  
20,68.384,rs619289,-0.040  
20,68.467,rs3091249,-0.039  
20,68.471,rs13038394,-0.039  
20,68.475,rs826959,-0.039  
20,68.477,rs3117532,-0.033  
20,68.479,rs285198,-0.033  
20,68.504,rs6103442,-0.031  
20,68.524,rs861157,-0.031  
20,68.624,rs11086895,-0.042  
20,68.647,rs6124601,-0.046  
20,68.719,rs4812761,-0.061  
20,68.734,rs2143557,-0.059  
20,68.736,rs764673,-0.046  
20,68.770,rs4812772,-0.073  
20,68.776,rs6031256,-0.059  
20,68.826,rs6124611,-0.051  
20,68.927,rs6093921,-0.033  
20,68.992,rs1883680,-0.026  
20,69.026,rs6031367,-0.023  
20,69.167,rs2017246,-0.015  
20,69.241,rs738498,-0.013  
20,69.284,rs1971447,-0.016  
20,69.319,rs6130569,-0.015  
20,69.354,rs17755371,-0.014  
20,69.356,rs16985330,-0.015  
20,69.403,rs4812854,-0.040  
20,69.405,rs6031753,-0.043  
20,69.410,rs6130677,-0.050  
20,69.410,rs4812858,-0.050  
20,69.415,rs6017407,-0.047



20,69.423,rs6031782,-0.044  
20,69.427,rs1078342,-0.051  
20,69.455,rs6017430,-0.070  
20,69.474,rs2425672,-0.085  
20,69.491,rs1804644,-0.084  
20,69.493,rs2299971,-0.084  
20,69.512,rs1015519,-0.099  
20,69.530,rs6031957,-0.104  
20,69.577,rs12625505,-0.114  
20,69.598,rs6017525,-0.118  
20,69.608,rs8113868,-0.120  
20,69.622,rs2743312,-0.118  
20,69.636,rs1981431,-0.116  
20,69.663,rs4810449,-0.092  
20,69.670,rs6104159,-0.133  
20,69.896,rs2272955,-0.139  
20,69.960,rs6104239,-0.142  
20,69.972,rs6073789,-0.143  
20,70.364,rs1967656,-0.149  
20,70.514,rs1736493,-0.156  
20,70.594,rs16990934,-0.158  
20,70.677,rs7679,-0.160  
20,70.787,rs6104410,-0.163  
20,70.862,rs3933239,-0.164  
20,71.025,rs2297199,-0.166  
20,71.173,rs1535044,-0.169  
20,71.236,rs6074037,-0.170  
20,71.260,rs6074043,-0.174  
20,71.293,rs2425761,-0.178  
20,71.349,rs2868767,-0.189  
20,71.423,rs2050113,-0.205  
20,71.476,rs2868714,-0.209  
20,71.564,rs2425861,-0.207  
20,71.607,rs2180911,-0.189  
20,71.620,rs2425867,-0.185  
20,71.825,rs1011595,-0.173  
20,71.919,rs7266119,-0.176  
20,71.939,rs636493,-0.177  
20,71.958,rs3752261,-0.176  
20,71.974,rs6065998,-0.178  
20,72.087,rs6063003,-0.220  
20,72.147,rs2064342,-0.207  
20,72.180,rs10854172,-0.216  
20,72.242,rs2425882,-0.230  
20,72.316,rs13038390,-0.227  
20,72.591,rs16991859,-0.187  
20,72.624,rs3092651,-0.183  
20,72.694,rs3091621,-0.183  
20,72.744,rs3092379,-0.173  
20,72.905,rs2151389,-0.108  
20,73.148,rs6124883,-0.103  
20,73.205,rs6018168,-0.076  
20,73.229,rs1412955,-0.089  
20,73.374,rs11696413,-0.069  
20,73.395,rs1211644,-0.069  
20,73.443,rs6018223,-0.052  
20,73.447,rs3787265,-0.050  
20,73.481,rs6066179,-0.039  
20,73.483,rs4810599,-0.038  
20,73.485,rs11086190,-0.037  
20,73.540,rs3827060,-0.025

20,73.573,rs6063073,-0.026  
20,73.665,rs6090639,-0.030  
20,73.681,rs2235908,-0.018  
20,73.730,rs761021,-0.014  
20,73.839,rs7268399,-0.031  
20,73.840,rs6063100,-0.031  
20,74.025,rs12624409,-0.042  
20,74.069,rs2425938,-0.060  
20,74.104,rs4810643,-0.062  
20,74.337,rs1569438,-0.064  
20,74.652,rs1889177,-0.093  
20,74.659,rs6018639,-0.093  
20,74.697,rs12480922,-0.103  
20,74.719,rs4809645,-0.108  
20,74.736,rs6063140,-0.090  
20,74.763,rs4810669,-0.073  
20,74.826,rs914870,-0.050  
20,74.850,rs1930825,-0.036  
20,74.922,rs4810694,-0.034  
20,75.115,rs6094895,-0.038  
20,75.150,rs3092802,-0.029  
20,75.224,rs6018788,-0.032  
20,75.256,rs992585,-0.055  
20,75.321,rs6125184,-0.050  
20,75.323,rs4810736,-0.050  
20,75.392,rs6066574,-0.059  
20,75.646,rs6063208,-0.099  
20,75.750,rs645580,-0.086  
20,75.791,rs745086,-0.040  
20,75.949,rs2024594,-0.045  
20,76.361,rs3092791,-0.053  
20,76.838,rs7269408,-0.056  
20,76.852,rs3091796,-0.058  
20,76.907,rs926673,-0.067  
20,76.979,rs6095526,-0.072  
20,77.000,rs13044588,-0.075  
20,77.056,rs506958,-0.083  
20,77.079,rs5602,-0.081  
20,77.163,rs12625166,-0.078  
20,77.223,rs557446,-0.056  
20,77.243,rs544334,-0.058  
20,77.244,rs6019925,-0.058  
20,77.247,rs479180,-0.059  
20,77.259,rs6063413,-0.058  
20,77.357,rs4141587,-0.066  
20,77.373,rs6091023,-0.051  
20,77.562,rs12625137,-0.052  
20,77.597,rs6020041,-0.053  
20,77.612,rs618019,-0.042  
20,77.618,rs678634,-0.039  
20,77.764,rs652217,-0.045  
20,78.076,rs4811002,-0.053  
20,78.090,rs11697330,-0.047  
20,78.130,rs6020235,-0.028  
20,78.302,rs6012876,-0.033  
20,78.308,rs13045110,-0.033  
20,78.334,rs4811012,-0.036  
20,78.359,rs4809773,-0.039  
20,78.390,rs6067396,-0.030  
20,78.402,rs6020431,-0.026  
20,78.536,rs2002635,-0.021

20,78.644,rs16995208,-0.018  
20,78.744,rs2179605,-0.016  
20,78.854,rs6095962,-0.016  
20,79.043,rs932420,-0.016  
20,79.441,rs10485615,-0.022  
20,79.480,rs8122104,-0.023  
20,79.481,rs768175,-0.023  
20,79.759,rs12479559,-0.026  
20,79.954,rs6020717,-0.020  
20,80.107,rs6020732,-0.024  
20,80.133,rs6020739,-0.024  
20,80.771,rs6020871,-0.005  
20,80.786,rs1040771,-0.000  
20,80.794,rs6020905,-0.000  
20,80.808,rs1570009,-0.002  
20,80.850,rs736213,0.000  
20,80.864,rs229998,0.000  
20,80.875,rs6020997,0.000  
20,80.892,rs16995777,0.000  
20,80.916,rs1014756,0.000  
20,80.935,rs1997815,0.000  
20,80.944,rs1555147,0.000  
20,80.983,rs6096361,0.001  
20,81.000,rs4809830,0.004  
20,81.003,rs761685,0.004  
20,81.008,rs8117067,0.005  
20,81.017,rs6067742,0.005  
20,81.035,rs6063641,0.005  
20,81.036,rs12480160,0.005  
20,81.105,rs1569736,0.006  
20,81.467,rs16996025,0.011  
20,81.538,rs6021231,0.022  
20,81.549,rs747063,0.023  
20,81.586,rs6021264,0.035  
20,81.600,rs8119787,0.041  
20,81.609,rs6021275,0.041  
20,81.629,rs6063670,0.046  
20,81.655,rs6021297,0.053  
20,81.659,rs761382,0.053  
20,81.666,rs6021301,0.052  
20,81.784,rs4811223,0.035  
20,81.793,rs13042311,0.035  
20,81.824,rs1475670,0.032  
20,81.918,rs6021460,0.019  
20,81.974,rs6068020,0.009  
20,82.015,rs1883731,0.008  
20,82.029,rs6096686,0.008  
20,82.126,rs6021631,0.003  
20,82.128,rs6021632,0.003  
20,82.162,rs2426407,0.010  
20,82.205,rs6021661,0.004  
20,82.226,rs6068063,0.002  
20,82.262,rs6013382,0.002  
20,82.280,rs6021702,0.002  
20,82.398,rs3787178,0.001  
20,82.422,rs6021771,0.001  
20,82.476,rs3761137,0.001  
20,83.111,rs6068271,-0.000  
20,83.132,rs2689372,-0.000  
20,83.181,rs707544,-0.000  
20,83.203,rs6022039,-0.000

20,83.275,rs6022045,-0.000  
20,83.316,rs17204629,-0.000  
20,83.554,rs241795,-0.000  
20,84.014,rs4501008,0.001  
20,84.111,rs6126673,0.002  
20,84.264,rs6022157,0.003  
20,84.267,rs6022158,0.003  
20,84.344,rs6097170,0.002  
20,84.445,rs6022207,0.001  
20,84.452,rs2741369,0.001  
20,84.459,rs6097189,0.001  
20,84.510,rs17328948,0.001  
20,84.582,rs2904295,0.000  
20,84.658,rs1936962,0.000  
20,84.731,rs8117683,0.000  
20,84.835,rs1293412,0.000  
20,84.927,rs1293387,0.000  
20,84.941,rs6068477,0.000  
20,84.976,rs2426460,-0.000  
20,85.049,rs6022333,-0.000  
20,85.073,rs12625311,-0.000  
20,85.156,rs916954,-0.000  
20,85.165,rs2426474,-0.000  
20,85.209,rs6091653,0.000  
20,85.261,rs1877430,0.001  
20,85.294,rs1543080,0.002  
20,85.307,rs2668791,0.002  
20,85.339,rs169271,0.004  
20,85.352,rs200633,0.003  
20,85.371,rs6097345,0.002  
20,85.394,rs8120425,0.003  
20,85.398,rs1355598,0.003  
20,85.399,rs6097354,0.007  
20,85.540,rs169269,0.015  
20,85.587,rs16997981,0.014  
20,85.594,rs2904359,0.014  
20,85.653,rs156617,0.012  
20,85.875,rs6022462,0.003  
20,85.910,rs7360757,0.000  
20,85.998,rs6068555,0.000  
20,86.153,rs8117157,0.000  
20,86.226,rs2766667,-0.001  
20,86.248,rs2766671,-0.001  
20,86.264,rs6063966,-0.001  
20,86.362,rs6068595,-0.001  
20,86.403,rs2041278,-0.001  
20,86.417,rs6068608,-0.003  
20,86.456,rs6097523,-0.001  
20,86.457,rs6068620,-0.001  
20,86.512,rs10854193,-0.000  
20,86.577,rs2041317,-0.000  
20,86.585,rs6126938,-0.000  
20,86.616,rs2058250,-0.000  
20,86.661,rs4811466,-0.001  
20,86.691,rs6022758,-0.003  
20,86.718,rs6097606,-0.003  
20,86.838,rs7267819,-0.002  
20,86.850,rs6097659,-0.002  
20,86.868,rs2904376,-0.002  
20,86.871,rs6022842,-0.002  
20,86.881,rs16998549,-0.000

20,86.899,rs6068723,0.001  
20,86.903,rs6127015,0.001  
20,86.939,rs1952,0.000  
20,86.960,rs4809946,0.000  
20,87.033,rs208381,-0.000  
20,87.148,rs290427,-0.000  
20,87.180,rs368195,-0.000  
20,87.198,rs6064045,-0.000  
20,87.230,rs8123293,-0.001  
20,87.236,rs158528,-0.001  
20,87.249,rs210069,-0.001  
20,87.347,rs4809958,-0.001  
20,87.354,rs4809959,-0.001  
20,87.450,rs51301,-0.009  
20,87.894,rs6014100,-0.035  
20,87.910,rs6068930,-0.046  
20,87.911,rs2842,-0.047  
20,87.941,rs6064102,-0.046  
20,87.949,rs2870343,-0.045  
20,88.110,rs6023587,-0.057  
20,88.173,rs157640,-0.061  
20,88.185,rs6023609,-0.061  
20,88.198,rs458332,-0.060  
20,88.542,rs172410,-0.037  
20,88.609,rs6023759,-0.036  
20,89.047,rs6064179,-0.028  
20,89.147,rs6127423,-0.039  
20,89.260,rs1887305,-0.042  
20,89.658,rs11086499,-0.051  
20,89.884,rs3852923,-0.049  
20,89.896,rs13036829,-0.050  
20,89.979,rs6098616,-0.046  
20,90.043,rs16984758,-0.043  
20,90.069,rs415502,-0.041  
20,90.148,rs6024193,-0.043  
20,90.255,rs629522,-0.065  
20,90.288,rs6098668,-0.066  
20,90.548,rs366496,-0.048  
20,90.728,rs6014468,-0.031  
20,90.776,rs726121,-0.028  
20,90.927,rs4811626,-0.035  
20,91.249,rs6069473,-0.036  
20,91.330,rs4811645,-0.035  
20,91.429,rs6069499,-0.023  
20,91.444,rs1437213,-0.022  
20,92.079,rs17351628,-0.005  
20,92.088,rs6024655,-0.005  
20,92.335,rs6069674,-0.003  
20,92.739,rs6014711,-0.002  
20,92.749,rs2180691,-0.002  
20,92.754,rs1468055,-0.002  
20,92.795,rs7806,-0.001  
20,93.019,rs6069767,0.000  
20,93.061,rs6024941,0.001  
20,93.068,rs6092326,0.002  
20,93.107,rs2146912,0.001  
20,93.139,rs6024978,0.002  
20,93.167,rs1570532,0.001  
20,93.266,rs4811724,0.010  
20,93.270,rs6127813,0.011  
20,93.325,rs2426643,0.013

20,93.340,rs4810037,0.018  
20,93.382,rs6025140,0.020  
20,93.402,rs11906748,0.023  
20,93.434,rs1570182,0.040  
20,93.456,rs913664,0.044  
20,93.469,rs6025178,0.046  
20,93.479,rs6069900,0.045  
20,93.498,rs6069905,0.042  
20,93.514,rs12481021,0.037  
20,93.542,rs1467704,0.035  
20,93.566,rs7261954,0.048  
20,93.581,rs427034,0.055  
20,93.585,rs2249634,0.041  
20,93.661,rs6069935,0.067  
20,93.707,rs1276462,0.077  
20,93.745,rs6069957,0.085  
20,93.769,rs1276350,0.088  
20,93.849,rs1853053,0.098  
20,93.897,rs969997,0.103  
20,93.924,rs735588,0.106  
20,93.930,rs2180901,0.108  
20,93.967,rs17400154,0.115  
20,93.984,rs6014921,0.095  
20,93.996,rs6092424,0.097  
20,94.023,rs717908,0.103  
20,94.036,rs8115658,0.102  
20,94.081,rs11698307,0.101  
20,94.092,rs6123661,0.120  
20,94.108,rs6069995,0.117  
20,94.224,rs3787382,0.093  
20,94.415,rs182784,0.060  
20,94.746,rs6064535,0.042  
20,94.832,rs6014987,0.039  
20,94.856,rs6025543,0.039  
20,94.876,rs6092477,0.039  
20,94.923,rs1543434,0.041  
20,95.044,rs6128046,0.051  
20,95.044,rs6070117,0.052  
20,95.271,rs1328757,0.076  
20,95.278,rs1040566,0.076  
20,95.283,rs1804160,0.075  
20,95.284,rs2179706,0.075  
20,95.323,rs1546913,0.059  
20,95.350,rs4810086,0.041  
20,95.384,rs6015040,0.021  
20,95.393,rs6064572,0.030  
20,95.409,rs742724,0.022  
20,95.458,rs17499060,0.024  
20,95.467,rs4811895,0.025  
20,95.482,rs6128111,0.024  
20,95.540,rs927171,0.027  
20,95.592,rs157091,0.026  
20,95.603,rs6025720,0.028  
20,95.634,rs157106,0.033  
20,95.696,rs6092524,0.027  
20,95.746,rs1556178,0.029  
20,95.824,rs967990,0.024  
20,95.903,rs6099755,0.029  
20,95.960,rs6025794,0.030  
20,96.050,rs913891,0.028  
20,96.128,rs4811937,0.027

20,96.326,rs227233,0.019  
20,96.368,rs6015141,0.018  
20,96.463,rs408319,0.017  
20,96.522,rs380505,0.017  
20,96.574,rs4561716,0.015  
20,96.615,rs6123756,0.016  
20,96.696,rs6099874,0.015  
20,96.855,rs2151696,0.017  
20,96.968,rs7262054,0.021  
20,97.023,rs6015170,0.006  
20,97.124,rs915041,0.006  
20,97.455,rs6026069,0.001  
20,97.499,rs6128273,-0.000  
20,97.712,rs873131,-0.000  
20,97.758,rs6070379,-0.000  
20,97.858,rs530445,-0.000  
20,97.876,rs6128290,-0.000  
20,97.876,rs6070385,-0.000  
20,98.044,rs3787158,0.000  
20,98.047,rs3746406,0.001  
20,98.668,rs4812024,-0.000  
20,98.810,rs435208,-0.001  
20,98.989,rs6015366,-0.000  
20,99.094,rs911303,-0.000  
20,99.231,rs8125112,-0.000  
20,99.287,rs6123836,-0.000  
20,99.389,rs919197,0.000  
20,99.677,rs9760,-0.001  
20,99.994,rs6070722,-0.010  
20,100.016,rs13036348,-0.011  
20,100.108,rs4812058,-0.012  
20,100.278,rs260012,-0.009  
20,100.368,rs7264385,-0.010  
20,100.600,rs3026620,-0.007  
20,100.634,rs11570248,-0.006  
20,100.649,rs197173,-0.005  
20,100.678,rs2268689,-0.006  
20,100.686,rs2284804,-0.007  
20,100.731,rs197175,-0.007  
20,100.785,rs197180,-0.008  
20,100.841,rs197813,-0.003  
20,100.848,rs3026511,-0.003  
20,100.882,rs6026837,-0.003  
20,100.897,rs7267528,-0.006  
20,100.912,rs906399,-0.009  
20,100.994,rs6026872,-0.016  
20,100.995,rs1041272,-0.016  
20,101.039,rs6064780,-0.017  
20,101.043,rs271982,-0.016  
20,101.071,rs6064783,-0.010  
20,101.073,rs271950,-0.010  
20,101.109,rs271962,-0.011  
20,101.132,rs271978,-0.006  
20,101.134,rs6026890,-0.006  
20,101.159,rs6026894,-0.005  
20,101.185,rs11905457,-0.004  
20,101.263,rs6026918,-0.001  
20,101.272,rs275275,-0.001  
20,101.347,rs11086671,-0.002  
20,101.363,rs6026945,-0.006  
20,101.368,rs3905228,-0.006

20,101.423,rs6128620,-0.014  
20,101.586,rs2426800,-0.020  
20,101.588,rs6026986,-0.020  
20,101.712,rs911148,-0.023  
20,101.805,rs6070900,-0.029  
20,101.959,rs816103,-0.033  
20,101.991,rs6027060,-0.025  
20,102.035,rs6027069,-0.020  
20,102.063,rs1182475,-0.020  
20,102.251,rs6027132,-0.027  
20,102.260,rs6015584,-0.027  
20,102.299,rs746219,-0.025  
20,102.336,rs2296764,-0.023  
20,102.841,rs8122451,-0.008  
20,102.925,rs766712,-0.006  
20,103.011,rs6071096,-0.007  
20,103.014,rs242789,-0.007  
20,103.088,rs6123968,-0.001  
20,103.140,rs4812147,-0.000  
20,103.152,rs12480283,-0.000  
20,103.269,rs8124901,-0.000  
20,103.401,rs6027379,-0.001  
20,103.518,rs6092900,-0.004  
20,103.524,rs560822,-0.006  
20,103.538,rs486862,-0.015  
20,104.047,rs354731,-0.052  
20,104.062,rs6027564,-0.052  
20,104.136,rs911167,-0.055  
20,104.395,rs348780,-0.059  
20,104.448,rs6071223,-0.058  
20,104.514,rs6064938,-0.057  
20,104.750,rs846201,-0.042  
20,104.981,rs1201879,-0.040  
20,105.061,rs4812180,-0.041  
20,105.071,rs1201915,-0.041  
20,105.234,rs1202043,-0.063  
20,105.250,rs1202047,-0.049  
20,105.262,rs1321704,-0.050  
20,105.338,rs2426913,-0.057  
20,105.349,rs2426919,-0.058  
20,105.352,rs6027822,-0.063  
20,105.353,rs1321715,-0.064  
20,105.532,rs6101100,-0.037  
20,105.541,rs4812219,-0.031  
20,105.556,rs6128926,-0.022  
20,105.564,rs7272074,-0.024  
20,105.623,rs6027887,-0.039  
20,105.645,rs13040718,-0.029  
20,105.652,rs1033567,-0.027  
20,105.688,rs10485472,-0.024  
20,105.812,rs6128962,-0.041  
20,105.877,rs6124039,-0.059  
20,105.896,rs1015199,-0.061  
20,105.913,rs6027933,-0.060  
20,105.972,rs6101153,-0.059  
20,105.973,rs4812248,-0.068  
20,105.974,rs6065026,-0.048  
20,106.077,rs1547018,-0.034  
20,106.159,rs6027989,-0.030  
20,106.177,rs6027995,-0.025  
20,106.220,rs2865973,-0.036



20,106.299,rs6071483,-0.042  
20,106.394,rs2093140,-0.037  
20,106.422,rs6071502,-0.034  
20,106.431,rs10854214,-0.039  
20,106.446,rs2281572,-0.050  
20,106.605,rs817699,-0.048  
20,106.643,rs2426972,-0.045  
20,106.675,rs12185798,-0.048  
20,106.885,rs6071562,-0.060  
20,107.022,rs8118581,-0.062  
20,107.031,rs2427077,-0.062  
20,107.045,rs2427082,-0.080  
20,107.093,rs6101320,-0.076  
20,107.130,rs11908477,-0.073  
20,107.266,rs4925258,-0.053  
20,107.288,rs6061720,-0.045  
20,107.331,rs1892318,-0.049  
20,107.676,rs767725,-0.102  
20,107.755,rs13045910,-0.135  
20,107.814,rs7343474,-0.139  
20,107.844,rs7263235,-0.140  
20,108.057,rs11204437,-0.165  
20,108.080,rs6089452,-0.186  
20,108.119,rs6061706,-0.223  
20,108.141,rs1122269,-0.221  
20,108.153,rs944259,-0.190  
20,108.179,rs6142828,-0.210  
20,108.226,rs2026162,-0.207  
20,108.259,rs6061756,-0.248  
20,108.282,rs6061762,-0.257  
20,108.301,rs6089489,-0.267  
20,108.334,rs6061336,-0.288  
20,108.358,rs6121796,-0.296  
20,108.417,rs1888233,-0.288  
20,108.424,rs6061348,-0.287  
20,108.432,rs6061805,-0.288  
20,108.493,rs884938,-0.299  
20,108.530,rs16985602,-0.308  
20,108.571,rs6061834,-0.317  
20,108.601,rs1418796,-0.320  
20,108.643,rs6121814,-0.317  
20,108.748,rs6121817,-0.308  
20,108.768,rs1557183,-0.299  
20,108.779,rs2066422,-0.296  
20,108.820,rs6089541,-0.301  
20,108.850,rs6089291,-0.316  
20,108.877,rs2427234,-0.341  
20,108.963,rs6142884,-0.386  
20,108.994,rs1891582,-0.380  
20,109.073,rs6061928,-0.364  
20,109.253,rs6142922,-0.383  
20,109.466,rs6142711,-0.479  
20,109.500,rs6142946,-0.487  
20,109.674,rs1407959,-0.529  
20,109.783,rs6062129,-0.547  
20,109.825,rs1739591,-0.552  
20,109.987,rs6143006,-0.577  
20,110.388,rs6061501,-0.637  
20,110.460,rs1570026,-0.644  
20,110.492,rs2236200,-0.647  
20,110.559,rs4925239,-0.654

20,110.661,rs7344065,-0.585  
20,110.799,rs6089232,-0.489  
20,111.064,rs6062234,-0.493  
20,111.447,rs6122080,-0.547  
20,111.494,rs6062771,-0.574  
20,111.532,rs6089848,-0.590  
20,111.556,rs6062847,-0.596  
20,111.648,rs6062957,-0.533  
20,111.676,rs11907898,-0.528  
20,111.732,rs3787524,-0.515  
20,111.763,rs2249938,-0.504  
20,111.825,rs856952,-0.491  
20,111.867,rs708627,-0.478  
20,111.872,rs4549158,-0.476  
20,111.879,rs6122279,-0.476  
20,111.941,rs2075776,-0.472  
20,112.142,rs747680,-0.429  
20,112.393,rs11086147,-0.323  
20,112.497,rs6090188,-0.307  
20,112.513,rs2427474,-0.304  
20,112.569,rs6011530,-0.290  
20,112.579,rs882683,-0.290  
20,112.602,rs6011534,-0.261  
20,112.773,rs6090223,-0.293  
20,112.794,rs6011600,-0.301  
20,112.853,rs6011613,-0.273  
20,112.875,rs6090243,-0.274  
20,112.940,rs6062412,-0.275  
20,113.005,rs6090265,-0.277  
20,113.025,rs6122383,-0.275  
20,113.040,rs2144456,-0.274  
20,113.374,rs720607,-0.242  
20,113.388,rs911064,-0.241  
20,113.464,rs6062879,-0.238  
20,113.685,rs755203,-0.227  
20,113.793,rs2038442,-0.229  
20,113.996,rs6122454,-0.313  
20,114.018,rs884851,-0.319  
20,114.049,rs310602,-0.326  
20,114.050,rs3787116,-0.326  
20,114.078,rs1757779,-0.338  
20,114.249,rs310654,-0.332  
20,114.559,rs879471,-0.339  
20,114.647,rs6011002,-0.332  
20,114.671,rs2297437,-0.332  
20,114.942,rs6089770,-0.313  
20,115.002,rs6122172,-0.311  
20,115.273,rs3795149,-0.284  
20,115.358,rs8567,-0.286  
20,115.529,rs2275293,-0.314  
20,115.650,rs817355,-0.365  
20,115.884,rs816953,-0.397  
20,115.961,rs6090041,-0.401  
20,116.014,rs2229205,-0.395  
20,116.120,rs530703,-0.386  
20,116.224,rs379042,-0.391  
20,116.288,rs2983452,-0.359  
20,116.352,rs6011342,-0.363  
20,116.404,rs2427616,-0.366  
20,116.428,rs2427621,-0.367  
20,116.506,rs6010742,-0.367

20,116.557,rs2427638,-0.366  
21,4.853,rs1296971,-0.180  
21,6.580,rs3115511,-0.124  
21,6.737,rs7276618,-0.135  
21,6.992,rs7278536,-0.153  
21,7.040,rs2822391,-0.134  
21,7.125,rs4539869,-0.145  
21,7.321,rs2192160,-0.152  
21,7.370,rs434396,-0.149  
21,7.419,rs2013669,-0.149  
21,7.431,rs4816274,-0.149  
21,7.543,rs2822589,-0.162  
21,7.641,rs2822654,-0.133  
21,7.758,rs2822670,-0.143  
21,7.792,rs723855,-0.143  
21,7.808,rs2822695,-0.144  
21,7.824,rs1735484,-0.145  
21,7.880,rs2822737,-0.180  
21,7.888,rs2822753,-0.179  
21,7.953,rs1882918,-0.164  
21,7.967,rs989938,-0.161  
21,7.981,rs2822786,-0.157  
21,7.981,rs2822787,-0.157  
21,7.989,rs7281036,-0.156  
21,7.998,rs459526,-0.155  
21,8.158,rs2125755,-0.143  
21,8.169,rs2822835,-0.143  
21,8.261,rs1292739,-0.156  
21,8.285,rs8132820,-0.179  
21,8.290,rs2822904,-0.168  
21,8.308,rs2403806,-0.130  
21,8.318,rs2822919,-0.182  
21,8.405,rs1569338,-0.200  
21,8.449,rs926130,-0.211  
21,8.477,rs2822964,-0.264  
21,8.485,rs2253406,-0.264  
21,8.506,rs13049690,-0.254  
21,8.513,rs4816416,-0.251  
21,8.547,rs2256417,-0.252  
21,8.556,rs2229741,-0.256  
21,8.987,rs2823025,-0.312  
21,9.032,rs2142219,-0.314  
21,9.045,rs2012931,-0.348  
21,9.136,rs2823036,-0.315  
21,9.162,rs975336,-0.310  
21,9.305,rs1556286,-0.259  
21,9.391,rs2823068,-0.263  
21,9.981,rs2823141,-0.265  
21,10.027,rs2823153,-0.260  
21,10.250,rs11700906,-0.237  
21,10.296,rs2823188,-0.232  
21,10.502,rs2823233,-0.232  
21,10.544,rs2823238,-0.250  
21,10.690,rs1736148,-0.228  
21,10.760,rs2823301,-0.320  
21,10.848,rs2179030,-0.288  
21,10.911,rs8127304,-0.283  
21,10.912,rs9974915,-0.283  
21,11.153,rs2823468,-0.182  
21,11.207,rs17275497,-0.169  
21,11.304,rs2404001,-0.143

21,11.457,rs370081,-0.093  
21,11.609,rs2823575,-0.080  
21,11.645,rs1034117,-0.078  
21,11.824,rs2823625,-0.113  
21,11.892,rs1689059,-0.132  
21,11.933,rs238993,-0.141  
21,12.006,rs239066,-0.155  
21,12.013,rs2823744,-0.173  
21,12.014,rs1449516,-0.176  
21,12.036,rs7278719,-0.161  
21,12.050,rs239070,-0.147  
21,12.101,rs240495,-0.139  
21,12.116,rs9983087,-0.139  
21,12.129,rs440294,-0.167  
21,12.150,rs1449522,-0.182  
21,12.243,rs2823809,-0.230  
21,12.254,rs2823815,-0.229  
21,12.257,rs2039241,-0.229  
21,12.463,rs7279730,-0.262  
21,12.535,rs2032287,-0.298  
21,12.558,rs9305777,-0.314  
21,12.600,rs7275493,-0.344  
21,12.600,rs6517708,-0.345  
21,12.624,rs2823984,-0.355  
21,12.663,rs2823997,-0.373  
21,12.736,rs10482884,-0.376  
21,12.812,rs2824065,-0.378  
21,12.853,rs2223074,-0.375  
21,13.084,rs2824135,-0.348  
21,13.263,rs1014604,-0.329  
21,13.433,rs2142266,-0.320  
21,13.681,rs7281703,-0.291  
21,13.702,rs2824226,-0.290  
21,13.717,rs2223079,-0.294  
21,13.980,rs2824245,-0.289  
21,14.188,rs17210792,-0.283  
21,14.357,rs169374,-0.281  
21,14.574,rs8133689,-0.279  
21,14.688,rs12627444,-0.280  
21,14.826,rs1784873,-0.280  
21,14.862,rs17692646,-0.280  
21,14.941,rs9637031,-0.268  
21,14.956,rs1493101,-0.265  
21,14.989,rs208926,-0.260  
21,15.071,rs6517774,-0.276  
21,15.079,rs2824312,-0.281  
21,15.082,rs2824314,-0.282  
21,15.085,rs2824315,-0.284  
21,15.114,rs2824321,-0.288  
21,15.190,rs2824327,-0.321  
21,15.576,rs17755917,-0.382  
21,15.582,rs2824376,-0.383  
21,15.763,rs2824416,-0.341  
21,15.809,rs728015,-0.336  
21,15.966,rs243570,-0.350  
21,16.007,rs171477,-0.329  
21,16.033,rs2257906,-0.332  
21,16.046,rs173390,-0.328  
21,16.088,rs10446073,-0.320  
21,16.145,rs2824512,-0.295  
21,16.216,rs2824534,-0.255

21,16.230,rs7282252,-0.253  
21,16.355,rs174742,-0.265  
21,16.441,rs1867704,-0.279  
21,16.494,rs2824607,-0.278  
21,16.549,rs150141,-0.282  
21,16.650,rs205667,-0.318  
21,16.654,rs2824640,-0.286  
21,16.668,rs2824646,-0.329  
21,16.739,rs2824700,-0.382  
21,16.746,rs2183557,-0.378  
21,16.764,rs7276198,-0.383  
21,16.859,rs9980111,-0.398  
21,16.868,rs997086,-0.420  
21,16.885,rs10482897,-0.475  
21,16.895,rs2406174,-0.491  
21,16.913,rs1041805,-0.579  
21,16.936,rs2824756,-0.603  
21,16.940,rs1475893,-0.602  
21,16.941,rs9978650,-0.563  
21,16.979,rs2824787,-0.592  
21,17.018,rs8132893,-0.586  
21,17.030,rs2824817,-0.584  
21,17.105,rs2824847,-0.569  
21,17.162,rs2824902,-0.574  
21,17.197,rs983475,-0.577  
21,17.205,rs2824909,-0.577  
21,17.354,rs9975541,-0.593  
21,17.358,rs7277618,-0.594  
21,17.389,rs2825011,-0.593  
21,17.434,rs2212784,-0.590  
21,17.466,rs2825077,-0.588  
21,17.510,rs2825131,-0.593  
21,17.545,rs2825180,-0.596  
21,17.586,rs7276040,-0.596  
21,17.728,rs460820,-0.588  
21,17.832,rs2825252,-0.579  
21,17.836,rs376691,-0.580  
21,17.930,rs421439,-0.586  
21,17.960,rs2825298,-0.628  
21,17.963,rs2103500,-0.588  
21,17.964,rs2825303,-0.582  
21,18.116,rs2226409,-0.601  
21,18.358,rs1015566,-0.555  
21,18.432,rs2211938,-0.554  
21,18.461,rs2825425,-0.558  
21,18.689,rs2825522,-0.586  
21,18.701,rs856171,-0.502  
21,18.707,rs2825523,-0.456  
21,18.876,rs2825560,-0.432  
21,19.121,rs1489734,-0.405  
21,19.177,rs654477,-0.405  
21,19.245,rs397535,-0.378  
21,19.285,rs2825644,-0.368  
21,19.331,rs2825663,-0.371  
21,19.346,rs2825665,-0.349  
21,19.417,rs2825682,-0.358  
21,19.436,rs9983963,-0.361  
21,19.501,rs2825714,-0.370  
21,19.504,rs17003202,-0.358  
21,19.552,rs2154621,-0.387  
21,19.650,rs218331,-0.440

21,19.734,rs8134910,-0.429  
21,19.914,rs2825810,-0.439  
21,19.932,rs2825824,-0.441  
21,20.478,rs2825968,-0.398  
21,20.492,rs11088773,-0.395  
21,20.862,rs9978170,-0.324  
21,20.898,rs2032203,-0.352  
21,20.919,rs2826182,-0.351  
21,20.937,rs1586488,-0.354  
21,20.959,rs2826225,-0.347  
21,20.967,rs874320,-0.329  
21,20.968,rs2019116,-0.327  
21,20.986,rs8133125,-0.267  
21,20.992,rs1735901,-0.262  
21,20.992,rs2989314,-0.264  
21,20.995,rs2826256,-0.269  
21,21.008,rs2826276,-0.233  
21,21.021,rs17199154,-0.195  
21,21.028,rs11911614,-0.181  
21,21.039,rs4629249,-0.145  
21,21.042,rs2826339,-0.143  
21,21.053,rs2826348,-0.137  
21,21.058,rs2000679,-0.133  
21,21.086,rs2826406,-0.108  
21,21.125,rs229431,-0.101  
21,21.155,rs229459,-0.094  
21,21.167,rs1482417,-0.097  
21,21.173,rs8127915,-0.098  
21,21.178,rs2826486,-0.118  
21,21.206,rs461016,-0.165  
21,21.234,rs2826520,-0.210  
21,21.258,rs2826546,-0.257  
21,21.284,rs2223728,-0.315  
21,21.304,rs1474757,-0.340  
21,21.338,rs2826612,-0.382  
21,21.358,rs2826626,-0.389  
21,21.362,rs7275484,-0.389  
21,21.378,rs6518017,-0.399  
21,21.379,rs8184921,-0.398  
21,21.418,rs8132873,-0.366  
21,21.444,rs7509909,-0.344  
21,21.462,rs2826662,-0.327  
21,21.470,rs2826672,-0.330  
21,21.505,rs2826721,-0.319  
21,21.685,rs2826842,-0.336  
21,21.708,rs1993668,-0.335  
21,21.732,rs233783,-0.315  
21,21.741,rs13049184,-0.307  
21,21.797,rs2739353,-0.308  
21,21.818,rs2522563,-0.311  
21,21.837,rs2223148,-0.304  
21,21.854,rs1980970,-0.297  
21,21.856,rs17554245,-0.296  
21,21.898,rs1735969,-0.284  
21,21.975,rs2776120,-0.332  
21,21.976,rs2254476,-0.333  
21,21.996,rs13053027,-0.362  
21,22.004,rs7283173,-0.369  
21,22.044,rs2827132,-0.395  
21,22.067,rs2211979,-0.421  
21,22.122,rs2154723,-0.485

21,22.136,rs1023361,-0.490  
21,22.185,rs6518127,-0.486  
21,22.416,rs2827246,-0.479  
21,22.472,rs2827260,-0.482  
21,22.647,rs2827303,-0.461  
21,22.678,rs2827315,-0.460  
21,22.783,rs2827417,-0.459  
21,22.844,rs2827434,-0.425  
21,23.042,rs2827541,-0.412  
21,23.132,rs2827563,-0.458  
21,23.207,rs2827633,-0.471  
21,23.240,rs915761,-0.455  
21,23.312,rs7280372,-0.478  
21,23.381,rs2827694,-0.502  
21,23.517,rs1475902,-0.547  
21,23.611,rs6518175,-0.553  
21,23.669,rs243276,-0.555  
21,24.067,rs2827806,-0.518  
21,24.071,rs198070,-0.517  
21,24.116,rs423334,-0.506  
21,24.172,rs12151983,-0.494  
21,24.172,rs2827841,-0.494  
21,24.379,rs1506007,-0.474  
21,24.398,rs1506011,-0.473  
21,24.495,rs2156384,-0.495  
21,24.527,rs984550,-0.492  
21,24.562,rs2828074,-0.498  
21,24.606,rs17004377,-0.493  
21,24.625,rs2828104,-0.490  
21,24.640,rs7278309,-0.492  
21,24.672,rs200700,-0.463  
21,24.707,rs2828176,-0.433  
21,24.756,rs2828209,-0.393  
21,24.779,rs2828219,-0.381  
21,24.794,rs2828242,-0.375  
21,24.830,rs2828264,-0.382  
21,24.901,rs1543117,-0.354  
21,24.914,rs7278243,-0.350  
21,24.956,rs2828420,-0.331  
21,24.965,rs1514414,-0.324  
21,25.004,rs2828457,-0.311  
21,25.017,rs2828476,-0.302  
21,25.040,rs2828500,-0.255  
21,25.098,rs176279,-0.229  
21,25.235,rs2828622,-0.218  
21,25.263,rs2828640,-0.224  
21,25.283,rs2828661,-0.230  
21,25.332,rs7276625,-0.239  
21,25.397,rs2828777,-0.211  
21,25.406,rs2828789,-0.209  
21,25.422,rs1910662,-0.206  
21,25.438,rs2040258,-0.189  
21,25.495,rs8130088,-0.161  
21,25.509,rs8133171,-0.155  
21,25.514,rs1475862,-0.156  
21,25.536,rs2829165,-0.141  
21,25.556,rs2829170,-0.131  
21,25.571,rs2829187,-0.126  
21,25.658,rs2250627,-0.080  
21,25.688,rs2829294,-0.087  
21,25.714,rs1009930,-0.089

21,25.786,rs1892732,-0.081  
21,25.797,rs4402842,-0.080  
21,26.016,rs2829505,-0.077  
21,26.222,rs928261,-0.071  
21,26.246,rs2829539,-0.071  
21,26.280,rs7277137,-0.071  
21,26.392,rs2026220,-0.075  
21,26.710,rs2829661,-0.085  
21,27.153,rs2829735,-0.066  
21,27.317,rs1893651,-0.065  
21,27.605,rs2829863,-0.065  
21,27.986,rs2829919,-0.073  
21,28.150,rs3787620,-0.072  
21,28.218,rs1783016,-0.072  
21,28.350,rs440666,-0.066  
21,28.372,rs216762,-0.064  
21,28.664,rs2830038,-0.049  
21,28.859,rs12482753,-0.045  
21,28.861,rs2830088,-0.045  
21,28.925,rs462281,-0.045  
21,29.037,rs463164,-0.046  
21,29.262,rs468345,-0.060  
21,29.419,rs2830177,-0.073  
21,29.471,rs219693,-0.071  
21,29.654,rs2830194,-0.126  
21,29.679,rs219616,-0.124  
21,29.683,rs219699,-0.130  
21,29.692,rs2830208,-0.144  
21,29.716,rs2830213,-0.162  
21,29.717,rs219701,-0.163  
21,29.729,rs219659,-0.175  
21,29.790,rs2830234,-0.242  
21,29.816,rs2830241,-0.268  
21,29.817,rs219648,-0.272  
21,29.834,rs2830252,-0.281  
21,29.873,rs191996,-0.305  
21,29.882,rs222972,-0.311  
21,29.888,rs7510108,-0.307  
21,29.893,rs222921,-0.303  
21,29.940,rs2830377,-0.224  
21,29.944,rs2212809,-0.219  
21,29.968,rs9967959,-0.197  
21,29.969,rs2187226,-0.193  
21,29.975,rs1893577,-0.183  
21,29.997,rs3017432,-0.197  
21,30.013,rs2830538,-0.206  
21,30.026,rs468969,-0.223  
21,30.028,rs7278460,-0.226  
21,30.037,rs12140,-0.238  
21,30.037,rs13615,-0.238  
21,30.041,rs370850,-0.240  
21,30.053,rs410349,-0.235  
21,30.078,rs162542,-0.217  
21,30.124,rs2830592,-0.217  
21,30.133,rs8128080,-0.197  
21,30.152,rs2830627,-0.176  
21,30.155,rs233609,-0.169  
21,30.163,rs1012766,-0.152  
21,30.190,rs2830663,-0.188  
21,30.211,rs2830701,-0.197  
21,30.218,rs2830713,-0.201



21,30.242,rs1351019,-0.213  
21,30.248,rs992499,-0.215  
21,30.258,rs2187230,-0.204  
21,30.266,rs11088023,-0.172  
21,30.279,rs2830786,-0.178  
21,30.288,rs2830790,-0.207  
21,30.303,rs2830811,-0.302  
21,30.314,rs237047,-0.350  
21,30.330,rs2830842,-0.366  
21,30.358,rs2830856,-0.379  
21,30.371,rs9977773,-0.379  
21,30.406,rs239656,-0.364  
21,30.425,rs239628,-0.358  
21,30.431,rs242326,-0.358  
21,30.432,rs2830956,-0.358  
21,30.439,rs242299,-0.354  
21,30.469,rs1981389,-0.319  
21,30.494,rs4817181,-0.288  
21,30.513,rs2831023,-0.283  
21,30.517,rs9975163,-0.283  
21,30.519,rs242341,-0.283  
21,30.568,rs2831057,-0.286  
21,30.617,rs2831145,-0.284  
21,30.669,rs181706,-0.277  
21,30.789,rs2831350,-0.248  
21,30.818,rs974607,-0.264  
21,30.819,rs2831449,-0.267  
21,30.829,rs2831475,-0.294  
21,30.830,rs16981703,-0.294  
21,30.850,rs2831511,-0.303  
21,30.875,rs2831547,-0.312  
21,30.895,rs2831615,-0.310  
21,30.989,rs8130371,-0.275  
21,31.025,rs2831744,-0.269  
21,31.069,rs2831805,-0.258  
21,31.192,rs9982652,-0.251  
21,31.239,rs2831913,-0.250  
21,31.250,rs2831927,-0.251  
21,31.279,rs981931,-0.250  
21,31.785,rs9982288,-0.272  
21,31.879,rs733610,-0.272  
21,31.927,rs1153285,-0.267  
21,32.177,rs2832329,-0.230  
21,32.348,rs2253438,-0.207  
21,32.509,rs2142160,-0.168  
21,32.568,rs16985084,-0.147  
21,32.570,rs464028,-0.147  
21,32.571,rs9983495,-0.175  
21,32.574,rs466013,-0.146  
21,32.636,rs9979883,-0.156  
21,32.668,rs466559,-0.160  
21,32.847,rs2832518,-0.174  
21,32.864,rs2832527,-0.176  
21,32.988,rs10432780,-0.199  
21,33.040,rs2832631,-0.275  
21,33.313,rs2832790,-0.334  
21,33.429,rs2832852,-0.323  
21,33.718,rs198921,-0.324  
21,34.029,rs2833114,-0.327  
21,34.036,rs2833117,-0.328  
21,34.055,rs2833124,-0.338

21,34.066,rs2833130,-0.341  
21,34.228,rs743323,-0.324  
21,34.285,rs2833161,-0.318  
21,34.298,rs16987408,-0.316  
21,34.509,rs2833188,-0.300  
21,34.676,rs1000927,-0.287  
21,34.764,rs1571691,-0.284  
21,34.928,rs2833282,-0.255  
21,34.986,rs2284472,-0.234  
21,35.014,rs2833306,-0.225  
21,35.017,rs723469,-0.224  
21,35.028,rs2248656,-0.227  
21,35.257,rs2300341,-0.277  
21,35.337,rs2253204,-0.246  
21,35.565,rs701724,-0.323  
21,35.704,rs581394,-0.340  
21,35.706,rs2284504,-0.341  
21,35.736,rs11909747,-0.385  
21,35.774,rs535985,-0.461  
21,35.814,rs2833401,-0.434  
21,35.845,rs2833406,-0.435  
21,35.864,rs558059,-0.396  
21,36.010,rs7282166,-0.411  
21,36.129,rs4817403,-0.369  
21,36.278,rs2409416,-0.373  
21,36.449,rs12626475,-0.401  
21,36.464,rs2833477,-0.402  
21,36.711,rs204750,-0.414  
21,36.741,rs2833505,-0.414  
21,36.800,rs2833524,-0.416  
21,36.801,rs1012482,-0.416  
21,36.970,rs2211783,-0.421  
21,37.023,rs2833550,-0.375  
21,37.032,rs11701165,-0.366  
21,37.046,rs9982597,-0.361  
21,37.130,rs2833565,-0.307  
21,37.165,rs2833577,-0.292  
21,37.169,rs2833579,-0.293  
21,37.284,rs3578,-0.283  
21,37.331,rs9305486,-0.312  
21,37.349,rs2833615,-0.322  
21,37.411,rs11911741,-0.317  
21,37.422,rs2833628,-0.315  
21,37.476,rs2833640,-0.298  
21,37.528,rs2833652,-0.282  
21,37.546,rs2833657,-0.280  
21,37.594,rs2833664,-0.267  
21,37.683,rs7275495,-0.259  
21,37.688,rs2051186,-0.252  
21,37.702,rs2833690,-0.251  
21,37.716,rs2833710,-0.265  
21,37.781,rs2833743,-0.255  
21,38.057,rs2833854,-0.214  
21,38.099,rs9979609,-0.211  
21,38.171,rs1782990,-0.198  
21,38.404,rs2833972,-0.142  
21,38.453,rs2833996,-0.135  
21,38.481,rs2834009,-0.131  
21,38.555,rs2834030,-0.209  
21,38.691,rs2834060,-0.221  
21,38.702,rs762236,-0.157

21,38.755,rs762178,-0.122  
21,38.772,rs7275842,-0.114  
21,38.878,rs7278735,-0.108  
21,38.990,rs2834090,-0.111  
21,39.008,rs8132749,-0.091  
21,39.025,rs2834092,-0.084  
21,39.056,rs1013059,-0.067  
21,39.083,rs2834109,-0.061  
21,39.156,rs8134313,-0.058  
21,39.251,rs2834147,-0.081  
21,39.265,rs2834153,-0.082  
21,39.346,rs2284550,-0.074  
21,39.352,rs2073362,-0.075  
21,39.406,rs2834167,-0.088  
21,39.483,rs1058867,-0.073  
21,39.504,rs8128184,-0.072  
21,39.640,rs1041868,-0.064  
21,39.750,rs9976971,-0.075  
21,39.862,rs1059293,-0.075  
21,40.920,rs1108000,-0.074  
21,40.933,rs2248321,-0.074  
21,40.969,rs2834278,-0.077  
21,41.000,rs9977155,-0.084  
21,41.103,rs2834291,-0.104  
21,41.259,rs2834305,-0.114  
21,41.332,rs2032314,-0.119  
21,41.373,rs2834332,-0.120  
21,41.506,rs2834368,-0.124  
21,41.780,rs8131205,-0.144  
21,41.841,rs873811,-0.142  
21,41.933,rs2010107,-0.146  
21,41.939,rs8134775,-0.127  
21,41.939,rs2834412,-0.127  
21,41.945,rs2834417,-0.128  
21,42.012,rs8128316,-0.119  
21,42.014,rs11702479,-0.112  
21,42.021,rs1010668,-0.113  
21,42.054,rs2834481,-0.112  
21,42.068,rs16991703,-0.112  
21,42.070,rs11088283,-0.112  
21,42.089,rs2211698,-0.112  
21,42.114,rs2243982,-0.111  
21,42.136,rs9636883,-0.087  
21,42.198,rs2834549,-0.090  
21,42.301,rs2834610,-0.110  
21,42.315,rs2834618,-0.097  
21,42.321,rs1981390,-0.091  
21,42.378,rs2249650,-0.130  
21,42.412,rs2284612,-0.152  
21,42.422,rs968625,-0.127  
21,42.434,rs2251826,-0.116  
21,42.437,rs2252175,-0.101  
21,42.457,rs2300401,-0.165  
21,42.480,rs8134179,-0.176  
21,42.480,rs2834669,-0.176  
21,42.493,rs2834675,-0.197  
21,42.509,rs7282762,-0.200  
21,42.541,rs11701555,-0.210  
21,42.555,rs1981392,-0.184  
21,42.571,rs11702779,-0.188  
21,42.581,rs2834725,-0.186

21,42.597,rs2242890,-0.191  
21,42.603,rs1883067,-0.187  
21,42.658,rs2834748,-0.138  
21,42.672,rs2834757,-0.137  
21,42.674,rs984659,-0.137  
21,42.715,rs17264072,-0.151  
21,42.772,rs7281587,-0.178  
21,42.850,rs2834874,-0.203  
21,42.885,rs2834889,-0.215  
21,43.046,rs2834930,-0.210  
21,43.099,rs2205109,-0.198  
21,43.176,rs2178832,-0.157  
21,43.270,rs2205112,-0.174  
21,43.361,rs2142100,-0.175  
21,43.386,rs1627997,-0.150  
21,43.992,rs16993569,-0.127  
21,44.001,rs2222956,-0.127  
21,44.523,rs752435,-0.108  
21,44.561,rs367467,-0.108  
21,44.619,rs2835165,-0.103  
21,44.912,rs2835270,-0.081  
21,44.948,rs2212922,-0.081  
21,44.974,rs13046990,-0.075  
21,44.990,rs2242816,-0.072  
21,45.042,rs3787732,-0.061  
21,45.071,rs3827183,-0.055  
21,45.075,rs11702555,-0.054  
21,45.080,rs2835333,-0.054  
21,45.114,rs12482030,-0.061  
21,45.149,rs218628,-0.059  
21,45.169,rs8596,-0.059  
21,45.217,rs170183,-0.061  
21,45.237,rs2000546,-0.025  
21,45.254,rs2835380,-0.024  
21,45.321,rs2835402,-0.028  
21,45.329,rs914147,-0.025  
21,45.339,rs928844,-0.022  
21,45.365,rs2250896,-0.017  
21,45.440,rs2252292,-0.000  
21,45.487,rs875224,0.002  
21,45.623,rs2070650,0.007  
21,45.640,rs2284985,0.005  
21,45.752,rs2835450,0.000  
21,45.863,rs2051397,-0.000  
21,45.947,rs2073418,-0.000  
21,46.075,rs3787750,0.000  
21,46.357,rs743430,0.001  
21,46.617,rs13050480,0.001  
21,47.014,rs2073423,0.001  
21,47.120,rs2835557,0.001  
21,47.160,rs8132470,0.002  
21,47.200,rs7281206,0.005  
21,47.575,rs13052269,0.001  
21,47.752,rs2835822,0.001  
21,47.944,rs857984,0.001  
21,48.049,rs858008,0.002  
21,48.097,rs2835908,0.002  
21,48.147,rs858027,0.006  
21,48.220,rs860798,0.007  
21,48.243,rs2835949,0.008  
21,48.342,rs2835975,0.009

21,48.378,rs2835991,0.010  
21,48.426,rs2226358,0.012  
21,48.456,rs7276928,0.014  
21,48.473,rs2836025,0.014  
21,48.522,rs928765,0.016  
21,48.529,rs8129919,0.010  
21,48.605,rs2836048,0.010  
21,48.608,rs3787870,0.011  
21,48.617,rs7275707,0.015  
21,48.708,rs2073358,0.015  
21,48.712,rs2836062,0.015  
21,48.773,rs2836076,0.017  
21,48.785,rs2836079,0.016  
21,48.819,rs1029001,0.033  
21,48.866,rs2836115,0.033  
21,49.386,rs2836195,0.039  
21,49.434,rs2836231,0.038  
21,49.591,rs2230033,0.035  
21,49.682,rs1007289,0.026  
21,49.745,rs2836338,0.028  
21,49.752,rs2836341,0.026  
21,49.899,rs2836381,0.014  
21,49.994,rs17230547,0.022  
21,49.994,rs17230554,0.022  
21,50.018,rs2836411,0.026  
21,50.037,rs1008927,0.027  
21,50.070,rs7278274,0.030  
21,50.401,rs2836480,0.041  
21,50.578,rs8130680,0.063  
21,50.636,rs2073427,0.043  
21,50.963,rs8130434,0.046  
21,51.051,rs743446,0.046  
21,51.100,rs2070528,0.051  
21,51.214,rs2836643,0.061  
21,51.242,rs2105658,0.064  
21,51.325,rs2836656,0.059  
21,51.357,rs2836667,0.076  
21,51.906,rs992244,0.116  
21,52.043,rs2836749,0.138  
21,52.054,rs9680113,0.131  
21,52.070,rs1888477,0.122  
21,52.115,rs2836770,0.134  
21,52.212,rs2836803,0.151  
21,52.242,rs732340,0.149  
21,52.257,rs2836816,0.149  
21,52.290,rs2236436,0.135  
21,52.306,rs2836835,0.133  
21,52.306,rs4816609,0.133  
21,52.312,rs2836837,0.132  
21,52.362,rs2836850,0.127  
21,52.507,rs2836878,0.102  
21,52.579,rs437398,0.088  
21,53.158,rs2070865,0.053  
21,53.205,rs2836989,0.051  
21,53.429,rs2049823,0.043  
21,53.605,rs1522,0.030  
21,53.651,rs1475594,0.026  
21,53.806,rs8127751,0.016  
21,53.849,rs673086,0.013  
21,53.913,rs667432,0.009  
21,53.922,rs634910,0.009

21,53.992,rs4818064,0.002  
21,54.026,rs4173,0.001  
21,54.172,rs2837129,0.000  
21,54.190,rs8127619,0.000  
21,54.201,rs368269,0.000  
21,54.639,rs386095,-0.015  
21,54.681,rs381716,-0.010  
21,54.767,rs2837269,-0.003  
21,54.768,rs17753847,-0.003  
21,54.827,rs6517577,-0.005  
21,54.832,rs2244189,-0.001  
21,54.844,rs2299776,0.000  
21,54.855,rs9808736,0.000  
21,54.904,rs2252046,-0.000  
21,54.928,rs2837304,-0.000  
21,54.941,rs1005412,-0.000  
21,54.944,rs9978224,-0.000  
21,55.013,rs2837324,-0.008  
21,55.018,rs2837326,-0.009  
21,55.030,rs4610145,-0.010  
21,55.035,rs1123923,-0.010  
21,55.105,rs6517581,-0.004  
21,55.160,rs2142090,-0.007  
21,55.219,rs760168,-0.006  
21,55.379,rs2249498,-0.005  
21,55.402,rs7277623,-0.005  
21,55.408,rs2837415,-0.005  
21,55.417,rs2837420,-0.004  
21,55.497,rs7276717,-0.001  
21,55.686,rs2837455,-0.001  
21,55.702,rs2837461,-0.001  
21,55.750,rs760172,-0.000  
21,55.777,rs2837478,0.000  
21,55.949,rs11908752,0.000  
21,56.167,rs2837553,-0.001  
21,56.181,rs2837554,-0.001  
21,56.219,rs2837569,-0.001  
21,56.244,rs1882760,-0.001  
21,56.304,rs2205081,-0.001  
21,56.660,rs1882757,-0.000  
21,56.691,rs12482021,-0.000  
21,56.714,rs4816682,-0.001  
21,56.728,rs9985057,-0.001  
21,56.785,rs2837628,-0.009  
21,56.785,rs7280016,-0.006  
21,56.786,rs2837629,-0.003  
21,56.792,rs2837631,-0.003  
21,56.830,rs2837637,-0.002  
21,57.193,rs16999939,-0.001  
21,57.211,rs2837693,-0.001  
21,57.245,rs2837695,-0.001  
21,57.385,rs8127599,-0.000  
21,57.409,rs2837716,-0.000  
21,57.614,rs7279213,-0.001  
21,57.645,rs1015993,-0.001  
21,57.750,rs2837766,-0.001  
21,57.804,rs2837773,-0.001  
21,57.897,rs4818163,0.001  
21,58.390,rs736977,0.007  
21,58.393,rs2837826,0.007  
21,58.478,rs2837835,0.005

21,58.498,rs2837838,0.005  
21,58.530,rs11701426,0.005  
21,58.563,rs2837852,0.006  
21,58.592,rs980274,0.007  
21,58.770,rs2837858,0.017  
21,58.793,rs17000375,0.017  
21,58.834,rs2837867,0.019  
21,59.050,rs2837887,0.017  
21,59.218,rs1467754,0.014  
21,59.420,rs12626949,0.007  
21,59.492,rs13052628,0.006  
21,59.525,rs2011706,0.005  
21,59.571,rs2837914,0.005  
21,59.737,rs744549,0.003  
21,59.833,rs8126990,0.003  
21,60.047,rs2016240,0.006  
21,60.108,rs734757,0.006  
21,60.127,rs4818219,0.008  
21,60.215,rs914185,0.001  
21,60.283,rs7510366,0.001  
21,60.302,rs9983496,0.001  
21,60.347,rs7280770,0.001  
21,60.454,rs3827211,-0.000  
21,60.536,rs7277420,-0.001  
21,60.603,rs3746889,-0.002  
21,60.627,rs2006737,-0.002  
21,60.633,rs2410416,-0.006  
21,60.870,rs2158354,-0.003  
21,61.048,rs379839,-0.005  
21,61.187,rs13048056,-0.004  
21,61.335,rs2838037,-0.003  
21,61.395,rs467798,-0.003  
21,61.504,rs2094881,-0.003  
21,61.529,rs2276205,-0.002  
21,61.584,rs3787950,-0.002  
21,61.603,rs3761373,-0.002  
21,61.630,rs395584,-0.002  
21,61.731,rs2838046,-0.003  
21,61.798,rs2838053,-0.004  
21,61.822,rs2838055,-0.005  
21,61.914,rs9982697,-0.015  
21,61.925,rs915867,-0.016  
21,62.245,rs9980286,-0.029  
21,62.334,rs7280734,-0.028  
21,62.364,rs2838077,-0.026  
21,62.415,rs2838083,-0.017  
21,62.427,rs2838086,-0.018  
21,62.468,rs2776348,-0.018  
21,62.484,rs3850712,-0.016  
21,62.501,rs2776365,-0.018  
21,62.507,rs4919954,-0.023  
21,62.514,rs7275945,-0.024  
21,62.563,rs9980272,-0.014  
21,62.584,rs10222189,-0.012  
21,62.593,rs3842986,-0.009  
21,62.663,rs6586235,-0.014  
21,62.666,rs3787954,-0.014  
21,62.784,rs8184900,-0.004  
21,62.801,rs4075970,-0.003  
21,62.910,rs11203189,-0.002  
21,62.946,rs4919983,-0.002

21,62.962,rs2839403,-0.015  
21,62.986,rs2839418,-0.021  
21,62.990,rs382736,-0.022  
21,63.004,rs13433498,-0.026  
21,63.012,rs455508,-0.027  
21,63.027,rs2839422,-0.030  
21,63.042,rs365163,-0.032  
21,63.064,rs8132865,-0.036  
21,63.082,rs7279279,-0.036  
21,63.083,rs9977045,-0.036  
21,63.128,rs915833,-0.044  
21,63.197,rs12482638,-0.053  
21,63.252,rs220207,-0.060  
21,63.261,rs2839440,-0.051  
21,63.265,rs11701948,-0.047  
21,63.273,rs220229,-0.044  
21,63.294,rs2839448,-0.028  
21,63.296,rs220245,-0.041  
21,63.300,rs150791,-0.070  
21,63.300,rs150792,-0.074  
21,63.334,rs220254,-0.070  
21,63.372,rs220281,-0.068  
21,63.390,rs2839462,-0.069  
21,63.421,rs8133193,-0.071  
21,63.457,rs220128,-0.074  
21,63.464,rs7282628,-0.074  
21,63.486,rs220155,-0.073  
21,63.487,rs13051533,-0.073  
21,63.508,rs220168,-0.068  
21,63.515,rs220178,-0.068  
21,63.526,rs7280633,-0.068  
21,63.574,rs220321,-0.068  
21,63.724,rs3787972,-0.074  
21,63.763,rs12329683,-0.077  
21,64.180,rs225385,-0.112  
21,64.251,rs3788007,-0.097  
21,64.251,rs15661,-0.080  
21,64.251,rs691567,-0.061  
21,64.252,rs692544,-0.061  
21,64.253,rs2839500,-0.065  
21,64.253,rs928302,-0.060  
21,64.253,rs11203200,-0.056  
21,64.253,rs3814903,-0.064  
21,64.253,rs11203203,-0.062  
21,64.254,rs2839519,-0.058  
21,64.254,rs4920106,-0.058  
21,64.254,rs4920107,-0.058  
21,64.254,rs17114976,-0.059  
21,64.255,rs2839538,-0.059  
21,64.256,rs6586325,-0.056  
21,64.256,rs1878069,-0.059  
21,64.257,rs17115227,-0.061  
21,64.257,rs375694,-0.062  
21,64.258,rs375886,-0.061  
21,64.260,rs2245730,-0.045  
21,64.277,rs8132186,-0.041  
21,64.340,rs6586343,-0.032  
21,64.388,rs2051402,-0.029  
21,64.413,rs756574,-0.028  
21,64.552,rs869725,-0.028  
21,64.947,rs4920004,-0.047



21,64.969,rs11911090,-0.047  
21,65.384,rs8130292,-0.049  
21,66.058,rs11701048,-0.040  
21,66.120,rs234783,-0.039  
21,66.135,rs3972,-0.038  
21,66.235,rs1888523,-0.027  
21,66.374,rs9975438,-0.021  
21,66.559,rs4920052,-0.014  
21,66.649,rs2839644,-0.002  
21,66.674,rs2839650,-0.001  
21,67.102,rs2838225,-0.003  
21,67.313,rs502993,-0.003  
21,67.361,rs2838257,-0.006  
21,67.413,rs86133,-0.002  
21,67.515,rs762395,-0.002  
21,67.542,rs2838281,-0.001  
21,67.566,rs681210,-0.000  
21,67.576,rs935798,-0.000  
21,67.637,rs9637161,0.000  
21,67.765,rs2838298,0.002  
21,67.789,rs762388,0.001  
21,67.827,rs4818955,0.009  
21,67.842,rs743452,0.004  
21,67.860,rs476861,0.001  
21,68.070,rs9975103,0.000  
21,68.116,rs162382,0.000  
21,69.122,rs2838340,-0.000  
21,69.133,rs17004598,-0.000  
21,69.939,rs9985006,-0.001  
21,70.330,rs4819338,-0.001  
21,70.562,rs13052002,-0.000  
21,70.665,rs2838447,-0.000  
21,70.832,rs13847,-0.002  
21,71.374,rs2242949,-0.005  
21,72.207,rs2026880,-0.007  
21,72.236,rs7354779,-0.008  
21,72.386,rs8130070,-0.012  
21,72.386,rs2850163,-0.012  
21,72.481,rs1800522,-0.015  
21,72.679,rs2236441,-0.012  
21,72.727,rs2838551,-0.011  
21,73.026,rs9974831,-0.019  
21,73.270,rs2838562,-0.038  
21,73.276,rs743491,-0.039  
21,73.702,rs8133141,-0.069  
21,73.740,rs233314,-0.068  
21,73.773,rs233322,-0.071  
21,73.855,rs2838591,-0.074  
21,74.066,rs377263,-0.089  
21,74.112,rs460380,-0.091  
21,74.413,rs2838622,-0.150  
21,74.600,rs1004686,-0.156  
21,74.704,rs235289,-0.163  
21,74.742,rs7278654,-0.159  
21,74.869,rs584681,-0.140  
21,74.887,rs4818972,-0.109  
21,75.032,rs2838684,-0.115  
21,75.269,rs235343,-0.123  
21,75.367,rs235310,-0.131  
21,75.643,rs2235133,-0.157  
21,75.688,rs2838734,-0.134

21,75.728,rs1474552,-0.158  
21,75.902,rs4818995,-0.192  
21,75.933,rs8134646,-0.200  
21,76.276,rs2838753,-0.258  
21,76.345,rs11088978,-0.260  
21,76.804,rs385674,-0.240  
21,76.875,rs3788164,-0.239  
21,77.249,rs2838813,-0.234  
21,77.347,rs1051385,-0.244  
21,77.377,rs17004757,-0.247  
21,77.547,rs2838859,-0.263  
21,77.736,rs2838869,-0.242  
21,77.838,rs9977697,-0.249  
21,77.849,rs13433469,-0.251  
21,77.870,rs4819063,-0.256  
21,77.925,rs2838875,-0.268  
21,78.136,rs7281481,-0.309  
21,78.264,rs2183589,-0.302  
21,78.314,rs2026886,-0.298  
21,78.398,rs2838923,-0.280  
21,78.660,rs2236459,-0.254  
21,78.701,rs2838942,-0.255  
21,78.815,rs7278425,-0.263  
21,78.978,rs1051266,-0.285  
21,79.107,rs944422,-0.288  
21,79.282,rs914238,-0.269  
21,79.863,rs17004797,-0.235  
21,80.473,rs2839010,-0.195  
21,80.473,rs2839011,-0.195  
21,80.838,rs8132054,-0.167  
21,81.176,rs2150458,-0.180  
21,81.502,rs1475888,-0.173  
21,81.535,rs4293630,-0.169  
21,81.703,rs9976319,-0.112  
21,81.734,rs9984052,-0.105  
21,81.758,rs9978582,-0.082  
21,81.859,rs4305353,-0.047  
21,82.085,rs2839117,-0.019  
21,82.128,rs1980983,-0.015  
21,82.198,rs4819208,-0.013  
21,82.552,rs2839155,-0.010  
21,82.627,rs16979001,-0.010  
21,84.199,rs2839307,-0.010  
21,84.580,rs9978658,-0.009  
21,84.702,rs2839367,-0.009  
21,84.820,rs2839376,-0.009  
21,84.882,rs15047,-0.009  
22,6.055,rs5747999,-1.033  
22,6.432,rs17433377,-0.976  
22,6.593,rs7291429,-0.957  
22,6.652,rs165611,-0.959  
22,6.850,rs7293026,-1.045  
22,6.871,rs5992587,-1.011  
22,6.925,rs1981707,-1.097  
22,6.943,rs2385786,-1.103  
22,7.018,rs4819934,-1.076  
22,7.073,rs7291404,-1.055  
22,7.079,rs5994129,-1.054  
22,7.161,rs2845394,-0.982  
22,7.284,rs6518660,-1.011  
22,7.297,rs9606615,-1.006

22,7.317,rs879577,-0.944  
22,7.353,rs5746996,-0.878  
22,7.372,rs5748883,-0.875  
22,7.393,rs5747007,-0.861  
22,7.419,rs1034859,-0.844  
22,7.427,rs5994180,-0.846  
22,7.487,rs1076102,-0.855  
22,7.514,rs2231495,-0.814  
22,7.534,rs5747018,-0.788  
22,7.545,rs1076105,-0.782  
22,7.603,rs5748965,-0.713  
22,7.634,rs4819979,-0.693  
22,7.635,rs5747035,-0.693  
22,7.645,rs1006015,-0.696  
22,7.661,rs8141904,-0.698  
22,7.672,rs9606669,-0.681  
22,7.752,rs5749011,-0.603  
22,7.811,rs9605252,-0.550  
22,7.836,rs9619055,-0.554  
22,7.871,rs5994271,-0.560  
22,7.903,rs4820001,-0.513  
22,7.908,rs2401081,-0.518  
22,7.913,rs2040692,-0.444  
22,7.967,rs9618000,-0.344  
22,7.986,rs9604738,-0.314  
22,7.988,rs7285871,-0.275  
22,8.057,rs5746366,-0.200  
22,8.100,rs2518746,-0.177  
22,8.106,rs1981533,-0.154  
22,8.154,rs5746398,-0.133  
22,8.220,rs2522297,-0.120  
22,8.261,rs174289,-0.097  
22,8.300,rs1296757,-0.079  
22,8.403,rs113837,-0.031  
22,8.407,rs174345,-0.030  
22,8.415,rs174347,-0.028  
22,8.442,rs2284827,-0.026  
22,8.457,rs423158,-0.024  
22,8.876,rs181396,-0.000  
22,8.931,rs5747351,0.000  
22,8.954,rs738095,0.000  
22,8.960,rs366542,0.000  
22,8.971,rs5992103,0.000  
22,8.976,rs5992838,-0.000  
22,9.034,rs390041,0.001  
22,9.061,rs2277831,0.001  
22,9.286,rs4819647,0.002  
22,9.342,rs4484121,0.003  
22,9.377,rs9618172,0.003  
22,9.539,rs450718,0.006  
22,9.542,rs452579,0.006  
22,9.619,rs462904,0.000  
22,9.636,rs458888,0.000  
22,9.666,rs5992985,0.001  
22,9.702,rs462055,0.003  
22,9.803,rs361540,0.011  
22,9.826,rs7286465,0.011  
22,9.898,rs2252257,0.012  
22,10.538,rs450046,0.044  
22,10.567,rs4819756,0.046  
22,10.575,rs759404,0.057

22,10.579,rs759406,0.063  
22,10.701,rs5747950,0.073  
22,10.721,rs2518805,0.075  
22,10.847,rs2072123,0.073  
22,11.111,rs4819778,0.074  
22,11.138,rs5993546,0.078  
22,11.175,rs2298271,0.082  
22,11.233,rs1061325,0.088  
22,11.612,rs2283650,0.091  
22,12.155,rs5748302,0.096  
22,12.241,rs5746800,0.096  
22,12.306,rs1476445,0.103  
22,12.361,rs1985884,0.129  
22,12.362,rs7291584,0.130  
22,12.400,rs5748391,0.133  
22,12.422,rs9605004,0.136  
22,12.448,rs1018851,0.139  
22,12.476,rs2097599,0.102  
22,12.543,rs4819835,0.106  
22,12.554,rs4819841,0.103  
22,12.572,rs2157731,0.099  
22,12.593,rs7291533,0.113  
22,12.685,rs5748427,0.126  
22,12.845,rs11704083,0.123  
22,12.926,rs2073750,0.128  
22,13.005,rs756661,0.146  
22,13.117,rs4680,0.163  
22,13.164,rs1990277,0.147  
22,13.478,rs1640299,0.167  
22,13.479,rs417309,0.166  
22,13.687,rs696884,0.157  
22,13.733,rs730669,0.125  
22,13.793,rs701431,0.133  
22,13.829,rs1567871,0.138  
22,13.919,rs854961,0.196  
22,13.939,rs741413,0.180  
22,13.991,rs2280117,0.167  
22,14.834,rs887021,0.114  
22,14.874,rs1005640,0.103  
22,14.977,rs7292126,0.054  
22,15.033,rs165626,0.055  
22,15.039,rs13433634,0.050  
22,15.044,rs1108101,0.046  
22,15.060,rs5759632,0.076  
22,15.062,rs16988632,0.075  
22,15.070,rs741193,0.077  
22,15.073,rs658793,0.072  
22,15.084,rs1076455,0.071  
22,15.285,rs165598,0.050  
22,15.383,rs756875,0.056  
22,15.387,rs178255,0.070  
22,15.396,rs178272,0.069  
22,15.399,rs7292968,0.074  
22,15.416,rs178297,0.085  
22,15.440,rs1548411,0.080  
22,15.450,rs5752500,0.082  
22,15.458,rs6005346,0.084  
22,15.471,rs442656,0.084  
22,15.532,rs421390,0.064  
22,15.570,rs1210606,0.063  
22,15.586,rs2541925,0.065

22,16.526,rs465500,0.059  
22,17.044,rs447001,0.066  
22,17.087,rs416661,0.067  
22,17.437,rs8141815,0.081  
22,17.780,rs238775,0.096  
22,17.799,rs6000509,0.105  
22,17.878,rs366116,0.141  
22,17.879,rs1372070,0.141  
22,17.894,rs1894239,0.139  
22,17.969,rs5750488,0.130  
22,17.969,rs16982689,0.130  
22,17.971,rs2329929,0.131  
22,17.979,rs5750496,0.111  
22,17.999,rs7286062,0.112  
22,18.108,rs5757080,0.113  
22,18.146,rs5757136,0.101  
22,18.235,rs4821846,0.077  
22,18.240,rs9623076,0.075  
22,18.292,rs8141482,0.074  
22,19.003,rs394409,0.035  
22,19.018,rs2188131,0.036  
22,19.019,rs469120,0.036  
22,19.153,rs9306383,0.028  
22,19.155,rs3788343,0.028  
22,19.182,rs16997431,0.028  
22,19.195,rs4820537,0.028  
22,19.637,rs5751614,0.026  
22,19.849,rs131677,0.017  
22,19.874,rs2239666,0.019  
22,19.932,rs131690,0.025  
22,20.172,rs8139654,0.017  
22,20.216,rs5759742,0.016  
22,20.258,rs5996528,0.016  
22,20.302,rs762260,0.015  
22,20.492,rs13056375,0.009  
22,20.496,rs6003692,0.008  
22,20.504,rs2330452,0.008  
22,20.835,rs4822416,0.003  
22,21.029,rs4822422,0.010  
22,21.129,rs9612370,0.007  
22,21.352,rs107017,-0.003  
22,21.405,rs9624216,-0.002  
22,21.422,rs131429,-0.003  
22,21.467,rs17002697,-0.002  
22,21.489,rs7288250,-0.002  
22,21.583,rs17627963,-0.001  
22,21.607,rs6003815,-0.002  
22,22.089,rs6003849,-0.004  
22,22.340,rs2070454,-0.010  
22,22.425,rs2073391,-0.013  
22,22.447,rs9612481,-0.015  
22,22.470,rs738802,-0.018  
22,22.491,rs2330625,-0.019  
22,22.526,rs875643,-0.028  
22,22.562,rs8138536,-0.039  
22,22.571,rs4822461,-0.039  
22,22.590,rs6004011,-0.040  
22,22.997,rs2001106,-0.052  
22,23.360,rs6004094,-0.061  
22,23.508,rs2267073,-0.067  
22,24.354,rs140335,-0.089

22,24.369,rs8136239,-0.105  
22,24.372,rs9704,-0.109  
22,24.389,rs3827322,-0.111  
22,24.542,rs5751901,-0.125  
22,25.052,rs9612740,-0.155  
22,25.142,rs131476,-0.164  
22,25.481,rs139606,-0.162  
22,25.618,rs5760687,-0.136  
22,25.698,rs2877251,-0.165  
22,25.848,rs11703103,-0.149  
22,25.938,rs139724,-0.136  
22,25.965,rs2877253,-0.130  
22,25.967,rs5760712,-0.130  
22,25.997,rs139735,-0.126  
22,26.029,rs11914055,-0.126  
22,26.206,rs5752024,-0.127  
22,26.396,rs11090362,-0.134  
22,26.431,rs5760779,-0.135  
22,27.007,rs2294371,-0.146  
22,27.392,rs1547435,-0.135  
22,27.430,rs5752079,-0.141  
22,27.475,rs6004483,-0.147  
22,27.516,rs8136087,-0.143  
22,27.533,rs8142586,-0.142  
22,27.533,rs6004490,-0.142  
22,27.616,rs4822591,-0.138  
22,27.634,rs9612906,-0.139  
22,27.858,rs5996898,-0.186  
22,28.074,rs8139746,-0.179  
22,28.191,rs133201,-0.174  
22,28.915,rs641296,-0.202  
22,29.008,rs12160908,-0.213  
22,29.008,rs6004694,-0.188  
22,29.131,rs5752185,-0.189  
22,29.691,rs5752196,-0.196  
22,29.985,rs133845,-0.202  
22,29.991,rs4822644,-0.201  
22,30.009,rs13054927,-0.196  
22,30.112,rs133885,-0.195  
22,30.144,rs133903,-0.196  
22,30.208,rs8142661,-0.195  
22,30.353,rs5761250,-0.193  
22,30.365,rs5761251,-0.193  
22,30.744,rs739281,-0.191  
22,30.755,rs695317,-0.180  
22,30.768,rs2157538,-0.146  
22,30.943,rs5761308,-0.182  
22,31.016,rs6004831,-0.188  
22,31.088,rs10427777,-0.192  
22,31.125,rs1013815,-0.191  
22,31.156,rs3948759,-0.188  
22,31.404,rs9306419,-0.164  
22,31.567,rs4822679,-0.158  
22,31.685,rs7288885,-0.154  
22,31.734,rs5752254,-0.156  
22,31.752,rs761670,-0.156  
22,31.851,rs5997026,-0.163  
22,31.957,rs9620587,-0.165  
22,32.041,rs9613094,-0.170  
22,32.091,rs12628683,-0.175  
22,32.334,rs134709,-0.199

22,32.408,rs5752275,-0.214  
22,32.444,rs6004968,-0.219  
22,32.482,rs137190,-0.251  
22,32.515,rs6519647,-0.224  
22,32.528,rs4822706,-0.224  
22,32.535,rs688700,-0.223  
22,32.546,rs655581,-0.222  
22,32.549,rs5997076,-0.218  
22,32.563,rs731276,-0.225  
22,32.568,rs16981987,-0.242  
22,32.582,rs5752318,-0.295  
22,32.582,rs8135154,-0.297  
22,32.582,rs9613168,-0.297  
22,32.594,rs761603,-0.283  
22,32.600,rs567600,-0.277  
22,32.689,rs134157,-0.314  
22,32.698,rs1011312,-0.317  
22,32.701,rs4149476,-0.318  
22,32.722,rs9613208,-0.324  
22,32.733,rs2267096,-0.336  
22,32.850,rs9613255,-0.391  
22,32.871,rs5761711,-0.411  
22,32.878,rs763105,-0.413  
22,32.888,rs5761729,-0.415  
22,32.898,rs1476035,-0.444  
22,32.907,rs5761744,-0.451  
22,32.920,rs4822791,-0.462  
22,32.927,rs7292381,-0.472  
22,32.932,rs9613266,-0.460  
22,32.937,rs1476033,-0.480  
22,32.941,rs2331331,-0.489  
22,32.941,rs2213707,-0.477  
22,32.955,rs5761777,-0.580  
22,32.961,rs17323675,-0.581  
22,32.963,rs136504,-0.581  
22,32.974,rs6005206,-0.593  
22,32.995,rs9608535,-0.608  
22,33.049,rs4822824,-0.481  
22,33.065,rs739259,-0.493  
22,33.080,rs16983313,-0.456  
22,33.086,rs2157465,-0.442  
22,33.095,rs16983365,-0.443  
22,33.102,rs2516083,-0.444  
22,33.110,rs5997154,-0.450  
22,33.116,rs4417,-0.465  
22,33.119,rs114559,-0.472  
22,33.130,rs79037,-0.496  
22,33.136,rs9613353,-0.494  
22,33.162,rs5761940,-0.484  
22,33.171,rs8138470,-0.520  
22,33.172,rs1883115,-0.499  
22,33.173,rs6519698,-0.482  
22,33.179,rs4820735,-0.481  
22,33.193,rs738164,-0.476  
22,33.208,rs134949,-0.453  
22,33.215,rs9608580,-0.452  
22,33.226,rs1028285,-0.417  
22,33.251,rs134164,-0.383  
22,33.261,rs2342401,-0.367  
22,33.289,rs9613403,-0.319  
22,33.296,rs497856,-0.281

22,33.306,rs9625188,-0.257  
22,33.311,rs552212,-0.248  
22,33.313,rs738488,-0.248  
22,33.318,rs134790,-0.236  
22,33.320,rs1076620,-0.233  
22,33.325,rs5762049,-0.239  
22,33.331,rs134794,-0.241  
22,33.333,rs874822,-0.238  
22,33.344,rs134815,-0.220  
22,33.369,rs543981,-0.164  
22,33.374,rs736950,-0.158  
22,33.381,rs2176659,-0.148  
22,33.409,rs2342936,-0.110  
22,33.420,rs8137706,-0.107  
22,33.422,rs7288551,-0.107  
22,33.436,rs16984491,-0.118  
22,33.437,rs6005420,-0.118  
22,33.439,rs5762120,-0.116  
22,33.442,rs136933,-0.113  
22,33.447,rs136947,-0.128  
22,33.459,rs1159795,-0.141  
22,33.459,rs13055229,-0.141  
22,33.465,rs761592,-0.136  
22,33.469,rs6005433,-0.093  
22,33.470,rs1884134,-0.100  
22,33.472,rs999223,-0.096  
22,33.497,rs5762167,-0.121  
22,33.508,rs5762182,-0.131  
22,33.517,rs11913002,-0.137  
22,33.523,rs738570,-0.141  
22,33.537,rs11703864,-0.137  
22,33.539,rs2207362,-0.136  
22,33.547,rs1983659,-0.131  
22,33.553,rs926937,-0.137  
22,33.559,rs5752585,-0.141  
22,33.560,rs743262,-0.139  
22,33.577,rs960613,-0.109  
22,33.581,rs723184,-0.107  
22,33.586,rs5752592,-0.103  
22,33.588,rs4822915,-0.103  
22,33.612,rs5752597,-0.098  
22,33.627,rs12160358,-0.075  
22,33.634,rs133986,-0.073  
22,33.644,rs738349,-0.071  
22,33.649,rs16985255,-0.068  
22,33.694,rs1885364,-0.046  
22,33.701,rs4820774,-0.046  
22,33.719,rs5997299,-0.046  
22,33.723,rs134133,-0.046  
22,33.724,rs738353,-0.047  
22,33.734,rs6005605,-0.071  
22,33.740,rs5762341,-0.076  
22,33.747,rs2014274,-0.074  
22,33.751,rs16985531,-0.077  
22,33.761,rs392277,-0.085  
22,33.768,rs2283847,-0.093  
22,33.788,rs11704546,-0.084  
22,34.257,rs134510,-0.063  
22,34.301,rs6005779,-0.061  
22,34.551,rs132549,-0.075  
22,34.556,rs5752839,-0.068



22,34.561,rs5762924,-0.062  
22,34.570,rs4823002,-0.062  
22,34.578,rs2294239,-0.060  
22,34.580,rs9625679,-0.060  
22,34.580,rs134558,-0.060  
22,34.582,rs134592,-0.060  
22,34.587,rs10483154,-0.069  
22,34.591,rs12158320,-0.075  
22,34.594,rs132274,-0.081  
22,34.616,rs713886,-0.097  
22,34.621,rs2744465,-0.100  
22,34.650,rs174775,-0.115  
22,34.660,rs5763241,-0.117  
22,34.660,rs174719,-0.117  
22,34.672,rs5763284,-0.120  
22,34.675,rs737976,-0.120  
22,34.715,rs2530682,-0.122  
22,34.804,rs5753021,-0.123  
22,34.951,rs9608852,-0.143  
22,34.961,rs2078856,-0.144  
22,34.977,rs6006405,-0.144  
22,35.163,rs2097919,-0.147  
22,35.286,rs2074733,-0.152  
22,35.481,rs2299826,-0.158  
22,35.612,rs17659494,-0.168  
22,35.624,rs2066926,-0.168  
22,35.785,rs4820864,-0.164  
22,35.858,rs4149488,-0.161  
22,35.932,rs4820018,-0.157  
22,36.014,rs4820888,-0.157  
22,36.130,rs713853,-0.154  
22,36.251,rs136389,-0.141  
22,36.505,rs4444,-0.118  
22,36.635,rs5997787,-0.105  
22,36.638,rs8142410,-0.104  
22,36.818,rs2240182,-0.099  
22,36.911,rs4820932,-0.109  
22,36.934,rs2413016,-0.113  
22,36.973,rs5997872,-0.109  
22,37.007,rs3747152,-0.105  
22,37.035,rs4820944,-0.104  
22,37.445,rs6518752,-0.092  
22,37.985,rs5753818,-0.105  
22,38.009,rs4820057,-0.106  
22,38.030,rs2267172,-0.109  
22,38.444,rs136429,-0.179  
22,38.550,rs2235168,-0.174  
22,38.583,rs5753950,-0.173  
22,38.588,rs1109611,-0.173  
22,38.598,rs7285170,-0.174  
22,38.628,rs4343557,-0.174  
22,38.659,rs2076037,-0.147  
22,38.662,rs9619261,-0.147  
22,38.713,rs9609551,-0.133  
22,38.716,rs6518776,-0.134  
22,38.718,rs2076054,-0.136  
22,38.734,rs7289943,-0.173  
22,38.740,rs12628404,-0.169  
22,38.742,rs9609560,-0.168  
22,38.759,rs7291067,-0.159  
22,38.810,rs5754144,-0.134

22,38.814,rs2710381,-0.136  
22,38.815,rs2858344,-0.116  
22,38.816,rs2157188,-0.116  
22,38.823,rs743762,-0.109  
22,38.835,rs1962222,-0.098  
22,38.844,rs131048,-0.093  
22,38.850,rs1009401,-0.104  
22,38.857,rs2858729,-0.119  
22,38.861,rs16990824,-0.144  
22,38.862,rs7364201,-0.151  
22,38.862,rs11704930,-0.151  
22,38.872,rs2858226,-0.149  
22,38.956,rs5998590,-0.087  
22,38.963,rs756481,-0.084  
22,38.967,rs11703257,-0.082  
22,38.974,rs743742,-0.079  
22,38.987,rs3788494,-0.090  
22,39.001,rs5754245,-0.080  
22,39.004,rs5754248,-0.096  
22,39.041,rs135152,-0.108  
22,39.114,rs4401302,-0.165  
22,39.176,rs2413180,-0.162  
22,39.333,rs724776,-0.178  
22,39.423,rs9621704,-0.143  
22,39.501,rs1076913,-0.116  
22,39.516,rs9609813,-0.110  
22,39.516,rs4239872,-0.110  
22,39.541,rs1540299,-0.092  
22,39.572,rs11703178,-0.093  
22,39.670,rs743728,-0.098  
22,39.693,rs9619358,-0.108  
22,39.736,rs130423,-0.125  
22,39.761,rs11913203,-0.133  
22,39.831,rs738961,-0.163  
22,39.879,rs5754630,-0.162  
22,39.908,rs2267249,-0.161  
22,39.914,rs4821173,-0.152  
22,39.940,rs17806754,-0.123  
22,39.969,rs2267268,-0.116  
22,39.980,rs2267271,-0.110  
22,39.989,rs239315,-0.115  
22,40.010,rs9621764,-0.125  
22,40.012,rs239330,-0.125  
22,40.065,rs238865,-0.130  
22,40.142,rs2267296,-0.105  
22,40.153,rs3819670,-0.103  
22,40.226,rs7290176,-0.074  
22,40.248,rs738987,-0.071  
22,40.324,rs130503,-0.067  
22,40.383,rs5749706,-0.066  
22,40.418,rs12167472,-0.070  
22,40.436,rs5749711,-0.070  
22,40.453,rs242885,-0.068  
22,40.487,rs372499,-0.065  
22,40.532,rs2213325,-0.075  
22,40.592,rs130662,-0.086  
22,40.721,rs130687,-0.088  
22,40.950,rs169466,-0.088  
22,41.079,rs5755023,-0.088  
22,41.216,rs1034394,-0.084  
22,41.270,rs8137002,-0.081

22,41.657,rs743726,-0.060  
22,42.037,rs2205810,-0.044  
22,42.111,rs137260,-0.056  
22,42.148,rs12159254,-0.057  
22,42.166,rs7286893,-0.058  
22,42.212,rs5750007,-0.044  
22,42.216,rs1013513,-0.044  
22,42.225,rs737821,-0.045  
22,42.235,rs7284941,-0.042  
22,42.247,rs2008519,-0.038  
22,42.248,rs5750031,-0.038  
22,42.264,rs5755543,-0.037  
22,42.421,rs4821359,-0.037  
22,42.499,rs7291929,-0.037  
22,42.946,rs134220,-0.037  
22,42.957,rs9306297,-0.037  
22,43.685,rs2092331,-0.032  
22,44.227,rs17793276,-0.038  
22,44.242,rs5755703,-0.038  
22,44.524,rs4645807,-0.053  
22,44.529,rs133431,-0.053  
22,44.578,rs5755730,-0.052  
22,45.244,rs9610308,-0.039  
22,45.249,rs139059,-0.038  
22,45.254,rs1883299,-0.037  
22,45.278,rs6518956,-0.022  
22,45.313,rs4820201,-0.025  
22,45.319,rs4820203,-0.024  
22,45.320,rs5750120,-0.024  
22,45.329,rs738370,-0.023  
22,45.359,rs7293,-0.018  
22,45.402,rs5755821,-0.013  
22,45.451,rs135109,-0.015  
22,45.514,rs9610342,-0.004  
22,45.639,rs2051579,-0.000  
22,45.885,rs1573708,0.000  
22,45.983,rs11089778,0.000  
22,45.995,rs4821456,0.000  
22,46.010,rs5756080,-0.000  
22,46.057,rs132667,-0.000  
22,46.085,rs2227167,-0.000  
22,46.104,rs5995255,0.000  
22,46.142,rs136142,-0.001  
22,46.167,rs136148,-0.001  
22,46.174,rs713753,-0.001  
22,46.199,rs735854,-0.002  
22,46.224,rs2239787,-0.003  
22,46.245,rs2239784,-0.006  
22,46.246,rs1005570,-0.006  
22,46.293,rs739097,-0.004  
22,46.487,rs5756202,-0.000  
22,46.519,rs5756219,-0.001  
22,46.562,rs8140240,-0.000  
22,46.587,rs5756233,-0.000  
22,46.597,rs2049974,-0.000  
22,46.633,rs1569488,0.002  
22,46.643,rs2050140,0.002  
22,46.669,rs2283985,0.003  
22,46.703,rs6000351,0.009  
22,46.718,rs5756268,0.009  
22,46.789,rs2746967,0.011

22,46.813,rs2284010,0.014  
22,46.866,rs715541,0.023  
22,46.899,rs1569784,0.024  
22,46.952,rs2009667,0.025  
22,46.999,rs2284022,0.035  
22,47.058,rs131833,0.034  
22,47.070,rs730483,0.020  
22,47.077,rs10854693,0.015  
22,47.088,rs746713,0.019  
22,47.115,rs6000464,0.033  
22,47.123,rs16997464,0.040  
22,47.176,rs4821567,0.057  
22,47.197,rs1534882,0.055  
22,47.206,rs131842,0.041  
22,47.237,rs13057045,0.041  
22,47.255,rs5995370,0.047  
22,47.318,rs5756477,0.076  
22,47.378,rs710183,0.095  
22,47.429,rs1421312,0.116  
22,47.447,rs228910,0.113  
22,47.468,rs228935,0.108  
22,47.492,rs2284033,0.075  
22,47.507,rs228979,0.059  
22,47.522,rs9622555,0.057  
22,47.531,rs5756531,0.045  
22,47.556,rs11913300,0.048  
22,47.557,rs229527,0.048  
22,47.577,rs16997918,0.041  
22,47.636,rs2213430,0.033  
22,47.670,rs6000645,0.036  
22,47.681,rs739036,0.034  
22,47.688,rs2267364,0.044  
22,47.691,rs1041894,0.043  
22,47.734,rs2284051,0.035  
22,47.742,rs1894599,0.021  
22,47.818,rs4821653,0.020  
22,47.833,rs11089838,0.018  
22,47.848,rs5750428,0.019  
22,47.916,rs2097454,0.022  
22,47.999,rs2235334,0.032  
22,48.040,rs7286335,0.037  
22,48.052,rs8137687,0.037  
22,48.076,rs2076087,0.036  
22,48.098,rs5750457,0.030  
22,48.099,rs12167035,0.030  
22,48.099,rs9917559,0.030  
22,48.143,rs761336,0.042  
22,48.149,rs4456799,0.043  
22,48.200,rs749326,0.050  
22,48.281,rs11089853,0.062  
22,48.785,rs2267366,0.058  
22,48.900,rs2267369,0.046  
22,48.985,rs7289126,0.033  
22,49.140,rs1997644,0.016  
22,49.141,rs7289981,0.018  
22,49.142,rs5750597,0.025  
22,49.150,rs2267387,0.027  
22,49.153,rs138407,0.027  
22,49.153,rs2269609,0.008  
22,49.159,rs16999046,0.011  
22,49.176,rs2072797,0.019

22,49.182,rs713863,0.025  
22,49.187,rs735306,0.036  
22,49.189,rs4361209,0.040  
22,49.191,rs4820357,0.038  
22,49.193,rs5757387,0.044  
22,49.194,rs7293205,0.045  
22,49.195,rs17298479,0.052  
22,49.198,rs2142833,0.063  
22,49.207,rs139275,0.076  
22,49.209,rs139371,0.080  
22,49.210,rs11089928,0.079  
22,49.214,rs926544,0.078  
22,49.214,rs17000830,0.088  
22,49.214,rs12166894,0.124  
22,49.215,rs5750764,0.123  
22,49.216,rs6001491,0.123  
22,49.219,rs4821877,0.131  
22,49.222,rs1569496,0.150  
22,49.230,rs5757642,0.182  
22,49.240,rs1003538,0.169  
22,49.242,rs4821903,0.164  
22,49.254,rs713938,0.105  
22,49.259,rs5757777,0.103  
22,49.279,rs107140,0.122  
22,49.308,rs3021274,0.159  
22,49.370,rs5995814,0.182  
22,49.453,rs12484776,0.219  
22,49.503,rs11703324,0.226  
22,49.585,rs8135759,0.236  
22,49.625,rs6001954,0.237  
22,49.766,rs1884276,0.219  
22,49.813,rs5758093,0.208  
22,49.972,rs2076196,0.216  
22,50.209,rs9607821,0.227  
22,52.142,rs134871,0.157  
22,52.633,rs17002948,0.144  
22,52.667,rs1548304,0.142  
22,53.496,rs4422240,0.117  
22,53.688,rs11912260,0.111  
22,53.864,rs4822134,0.105  
22,53.885,rs13057831,0.097  
22,53.925,rs5758756,0.100  
22,54.411,rs137139,0.144  
22,54.558,rs130334,0.159  
22,54.605,rs130370,0.166  
22,54.641,rs3788594,0.168  
22,54.828,rs4365558,0.178  
22,54.843,rs5758913,0.179  
22,54.895,rs2413716,0.180  
22,54.927,rs738532,0.178  
22,55.923,rs10427606,0.138  
22,55.924,rs5996262,0.138  
22,56.071,rs5759167,0.135  
22,56.106,rs738276,0.130  
22,56.182,rs2072852,0.120  
22,56.185,rs6003071,0.119  
22,56.224,rs5759197,0.110  
22,56.248,rs9333347,0.107  
22,56.253,rs80411,0.107  
22,56.386,rs5759219,0.065  
22,56.393,rs139004,0.063

22,56.402,rs916256,0.061  
22,56.410,rs9612028,0.061  
22,56.438,rs762957,0.070  
22,56.456,rs17516897,0.077  
22,56.469,rs737612,0.082  
22,56.482,rs139028,0.087  
22,56.529,rs6003130,0.085  
22,56.707,rs4820518,0.074  
22,56.818,rs5759291,0.075  
22,56.974,rs8136152,0.072  
22,57.190,rs2413761,0.060  
22,57.366,rs12168763,0.060  
22,58.724,rs138060,0.052  
22,58.769,rs5764359,0.052  
22,58.810,rs4823164,0.054  
22,58.832,rs2076213,0.053  
22,59.138,rs3177036,0.038  
22,59.469,rs6006611,0.036  
22,59.546,rs4823185,0.037  
22,59.608,rs9626091,0.038  
22,59.708,rs6006622,0.042  
22,59.819,rs2896022,0.045  
22,60.021,rs5764495,0.042  
22,60.176,rs2267604,0.046  
22,60.283,rs738482,0.034  
22,60.427,rs5764088,0.033  
22,60.427,rs12169088,0.033  
22,60.452,rs8140244,0.045  
22,60.465,rs9614325,0.049  
22,60.551,rs133909,0.080  
22,60.570,rs2267614,0.095  
22,60.603,rs5764558,0.131  
22,60.624,rs139069,0.134  
22,60.644,rs5764106,0.153  
22,60.652,rs139096,0.137  
22,60.676,rs2092351,0.143  
22,60.714,rs139142,0.132  
22,60.843,rs16991711,0.129  
22,60.849,rs9614403,0.129  
22,60.851,rs135444,0.129  
22,60.875,rs135437,0.125  
22,60.968,rs3935378,0.118  
22,60.998,rs6519840,0.113  
22,61.071,rs9626539,0.095  
22,61.090,rs5766069,0.095  
22,61.106,rs713724,0.095  
22,61.125,rs8138173,0.093  
22,61.127,rs1557553,0.095  
22,61.134,rs763041,0.099  
22,61.134,rs5764925,0.099  
22,61.185,rs135905,0.100  
22,61.251,rs135938,0.088  
22,61.290,rs135976,0.091  
22,61.420,rs6007154,0.056  
22,61.537,rs5764899,0.060  
22,61.569,rs2349623,0.056  
22,61.642,rs2349634,0.046  
22,61.656,rs138606,0.044  
22,61.670,rs16992538,0.034  
22,61.697,rs9306482,0.018  
22,61.715,rs738361,0.013

22,61.755,rs11913072,0.012  
22,61.865,rs6006845,0.020  
22,61.922,rs7292339,0.036  
22,61.937,rs9614882,0.041  
22,61.981,rs6007260,0.051  
22,61.988,rs739276,0.066  
22,62.000,rs734799,0.067  
22,62.021,rs132405,0.072  
22,62.086,rs132451,0.103  
22,62.097,rs739172,0.103  
22,62.115,rs132470,0.106  
22,62.147,rs9614932,0.118  
22,62.161,rs3788628,0.107  
22,62.186,rs1076933,0.112  
22,62.228,rs9614944,0.097  
22,62.251,rs9614576,0.089  
22,62.278,rs2285119,0.094  
22,62.290,rs2269539,0.095  
22,62.314,rs5766113,0.096  
22,62.331,rs8881,0.096  
22,62.378,rs762980,0.077  
22,62.435,rs5766175,0.072  
22,62.442,rs9614976,0.072  
22,62.626,rs16991948,0.111  
22,62.673,rs7287811,0.116  
22,62.689,rs1997890,0.118  
22,62.725,rs1005617,0.123  
22,62.742,rs132028,0.129  
22,62.773,rs5766358,0.161  
22,62.806,rs17628328,0.165  
22,62.808,rs12484773,0.159  
22,62.831,rs2057114,0.091  
22,62.903,rs9615022,0.062  
22,62.910,rs7284581,0.046  
22,62.910,rs6519913,0.046  
22,62.921,rs5766424,0.048  
22,63.037,rs9615049,0.049  
22,63.113,rs6007496,0.048  
22,63.129,rs2350623,0.047  
22,63.250,rs5766584,0.033  
22,63.321,rs58667,0.036  
22,63.541,rs719925,0.041  
22,63.749,rs1003505,0.037  
22,63.853,rs738223,0.035  
22,63.868,rs750449,0.033  
22,63.923,rs136723,0.044  
22,63.988,rs5764781,0.039  
22,64.005,rs7284208,0.039  
22,64.056,rs4415,0.057  
22,64.058,rs2071869,0.056  
22,64.084,rs5765512,0.048  
22,64.115,rs2071871,0.048  
22,64.616,rs3788677,0.054  
22,64.680,rs9614522,0.056  
22,64.681,rs713781,0.056  
22,64.682,rs9614790,0.056  
22,64.733,rs12167523,0.043  
22,64.734,rs11704609,0.043  
22,64.749,rs4823325,0.044  
22,65.210,rs8137493,0.075  
22,65.311,rs9616111,0.105

22,65.353,rs11090911,0.111  
22,65.434,rs135557,0.124  
22,65.501,rs4253655,0.128  
22,65.521,rs1555208,0.129  
22,65.594,rs5766743,0.131  
22,66.128,rs6007903,0.072  
22,66.148,rs3788684,0.069  
22,66.193,rs8138156,0.064  
22,66.199,rs8139582,0.064  
22,66.245,rs1984519,0.066  
22,66.269,rs5767221,0.072  
22,66.315,rs3788723,0.089  
22,66.341,rs17589429,0.100  
22,66.352,rs6008891,0.100  
22,66.370,rs3788727,0.083  
22,66.492,rs5768984,0.069  
22,66.493,rs1079837,0.069  
22,66.512,rs5769001,0.069  
22,66.680,rs2748335,0.076  
22,66.697,rs885792,0.077  
22,66.772,rs135680,0.080  
22,66.820,rs5769109,0.088  
22,66.899,rs17221476,0.097  
22,67.100,rs974226,0.095  
22,67.192,rs8136758,0.084  
22,67.258,rs6009040,0.072  
22,67.261,rs4823889,0.071  
22,67.292,rs16995971,0.068  
22,67.347,rs9616165,0.062  
22,67.370,rs713783,0.061  
22,67.438,rs4436,0.058  
22,67.609,rs4476,0.105  
22,67.653,rs131930,0.120  
22,67.728,rs16996345,0.122  
22,67.894,rs4823473,0.127  
22,67.933,rs17222768,0.145  
22,67.956,rs470039,0.141  
22,68.165,rs4823617,0.138  
22,68.286,rs732275,0.077  
22,68.349,rs5767645,0.071  
22,68.385,rs766168,0.072  
22,68.414,rs1005239,0.072  
22,68.513,rs5767676,0.087  
22,68.974,rs6008205,0.118  
22,68.992,rs763031,0.100  
22,69.334,rs1297376,0.100  
22,69.435,rs130481,0.128  
22,69.510,rs6007694,0.160  
22,69.608,rs13056610,0.154  
22,69.645,rs1858754,0.160  
22,69.667,rs9615554,0.138  
22,70.176,rs6008349,0.134  
22,70.196,rs132192,0.134  
22,70.262,rs6007738,0.135  
22,70.398,rs738738,0.136  
22,70.478,rs932548,0.138  
22,70.536,rs2208123,0.146  
22,70.711,rs761917,0.158  
22,70.794,rs6008436,0.186  
22,70.805,rs5768108,0.192  
22,70.811,rs4823723,0.196



22,70.844,rs9615661,0.207  
22,70.860,rs738733,0.211  
22,70.951,rs874960,0.185  
22,70.988,rs5768187,0.185  
22,71.050,rs738705,0.186  
22,71.140,rs13055322,0.168  
22,71.206,rs9615717,0.155  
22,71.323,rs5768273,0.142  
22,71.496,rs117294,0.162  
22,71.525,rs135272,0.160  
22,71.567,rs9627236,0.159  
22,71.608,rs6007798,0.158  
22,71.638,rs135307,0.136  
22,71.688,rs5768355,0.143  
22,71.892,rs131147,0.192  
22,71.929,rs135618,0.192  
22,72.036,rs926233,0.189  
22,72.165,rs5768450,0.236  
22,72.270,rs4389,0.247  
22,72.285,rs742025,0.284  
22,72.293,rs1004689,0.285  
22,72.300,rs133576,0.244  
22,72.302,rs4823515,0.230  
22,72.336,rs133582,0.237  
22,72.370,rs6007822,0.251  
22,72.391,rs4394,0.256  
22,72.435,rs11702956,0.246  
22,72.491,rs4396,0.242  
22,72.537,rs4400,0.277  
22,72.543,rs7287303,0.282  
22,72.555,rs133651,0.324  
22,72.564,rs11913704,0.314  
22,72.589,rs6519991,0.291  
22,72.699,rs2179060,0.304  
22,72.704,rs5768566,0.336  
22,72.752,rs97762,0.337  
22,72.954,rs11090839,0.360  
22,72.969,rs12106638,0.366  
22,72.983,rs7293013,0.370  
22,73.094,rs9615893,0.460  
22,73.142,rs9615901,0.433  
22,73.251,rs1894543,0.415  
22,73.274,rs16999282,0.416  
22,73.316,rs6007873,0.395  
22,73.359,rs16999308,0.410  
22,73.454,rs9615919,0.415  
22,73.467,rs16999372,0.406  
22,73.594,rs9615932,0.316  
22,73.895,rs8142256,0.338  
22,73.920,rs6010568,0.353  
22,73.935,rs8137195,0.361  
22,73.970,rs1028503,0.381  
22,74.017,rs5771716,0.358  
22,74.035,rs4925435,0.349  
22,74.158,rs738700,0.363  
22,74.316,rs16999845,0.392  
22,74.331,rs8140684,0.388  
22,74.401,rs6010527,0.354  
22,74.466,rs9617451,0.326  
22,74.478,rs5771851,0.340  
22,74.561,rs9628576,0.461

22,74.571,rs11204483,0.467  
22,74.606,rs9628580,0.487  
22,74.919,rs6009352,0.432  
22,74.962,rs1108604,0.424  
22,75.053,rs13058268,0.416  
22,75.165,rs4824067,0.369  
22,75.222,rs5769740,0.363  
22,75.323,rs2318432,0.371  
22,75.446,rs5769840,0.402  
22,75.560,rs9627832,0.445  
22,75.597,rs6009424,0.457  
22,75.752,rs135223,0.509  
22,75.815,rs135248,0.520  
22,75.832,rs6009503,0.523  
22,75.844,rs9616446,0.510  
22,75.941,rs5769440,0.403  
22,75.986,rs8141990,0.372  
22,76.070,rs2858579,0.340  
22,76.073,rs1005491,0.339  
22,76.257,rs2688143,0.263  
22,76.318,rs5770142,0.266  
22,76.348,rs2858649,0.223  
22,76.394,rs5769520,0.294  
22,76.439,rs2688098,0.323  
22,76.452,rs2858508,0.352  
22,76.491,rs7289034,0.330  
22,76.533,rs1124544,0.238  
22,76.542,rs739049,0.232  
22,76.580,rs848768,0.220  
22,76.671,rs708445,0.248  
22,76.711,rs17000838,0.251  
22,76.749,rs2269519,0.252  
22,76.813,rs1023453,0.232  
22,76.820,rs737356,0.230  
22,76.845,rs714007,0.223  
22,76.891,rs5770403,0.215  
22,76.900,rs4824032,0.213  
22,76.924,rs6009663,0.192  
22,76.958,rs5770418,0.199  
22,76.995,rs17826616,0.207  
22,77.011,rs5769644,0.194  
22,77.026,rs136790,0.157  
22,77.035,rs136796,0.160  
22,77.076,rs8138283,0.211  
22,77.101,rs714006,0.207  
22,77.230,rs5769676,0.220  
22,77.312,rs12168883,0.225  
22,77.358,rs2873932,0.233  
22,77.361,rs10854872,0.233  
22,77.421,rs134447,0.218  
22,77.422,rs728028,0.218  
22,77.423,rs8136975,0.193  
22,77.783,rs916362,0.215  
22,77.793,rs9616694,0.216  
22,77.892,rs5770619,0.218  
22,78.114,rs4824083,0.248  
22,78.184,rs6009845,0.280  
22,78.195,rs4823954,0.281  
22,78.683,rs761879,0.288  
22,79.551,rs137879,0.364  
22,79.576,rs137885,0.386

22,79.623,rs1079653,0.404  
22,79.692,rs7290681,0.442  
22,79.954,rs138229,0.454  
22,80.334,rs5771104,0.452  
22,80.390,rs730936,0.451  
22,81.018,rs12163408,0.445  
22,81.071,rs9628184,0.443  
22,81.156,rs7410465,0.446  
22,81.406,rs9616854,0.474  
22,81.451,rs4824157,0.517  
22,81.482,rs8138406,0.529  
22,81.696,rs6520149,0.460  
22,81.832,rs131750,0.437  
22,81.847,rs6010023,0.438  
22,82.024,rs9616802,0.434  
22,82.158,rs9616812,0.412  
22,82.325,rs2040487,0.389  
22,82.339,rs5770820,0.378  
22,82.390,rs715586,0.349  
22,82.440,rs3810648,0.349
