# Supplementary material for: Social Responsiveness, an Autism Endophenotype: Genomewide Significant Linkage to Two Regions on Chromosome 8
Source: Atypon-hosted journal article supplement (doi:10.1176/appi.ajp.2014.14050576), 2014-12-17

## TITLES AND LEGENDS TO SUPPLEMENTAL FIGURES

Figure SF1. Correlation between SRS raw total scores contributed by parent vs. teacher respondents.

Figure SF2. Non-parametric linkage scan for social responsiveness in 536 families from AGRE using parent reports. Gray and black dotted lines denote thresholds for genome-wide suggestive ( $\text{LOD} \geq 2.2$ ) and significant ( $\text{LOD} \geq 3.6$ ) evidence for complex trait linkage, respectively.

Figure SF3. Genome-wide significant linkage for SRS on chr8p23.1 and chr8q24.22 using parent reports. Gray “x” indicates association signal for SRS as a quantitative trait using imputed genotype data.

SUPPLEMENTAL FIGURES

Figure SF1

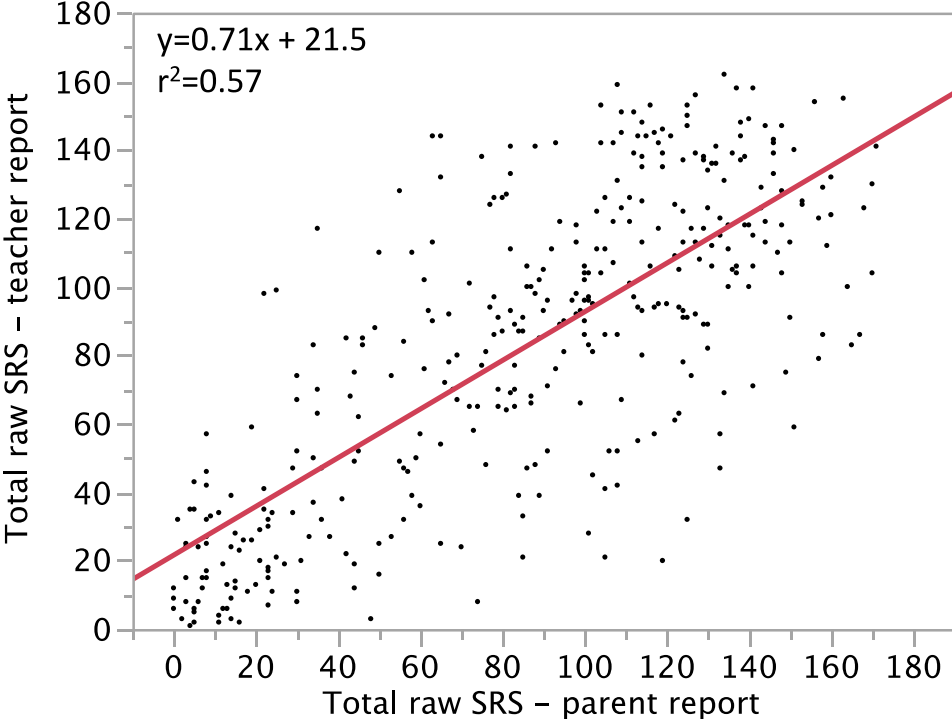

Figure SF2

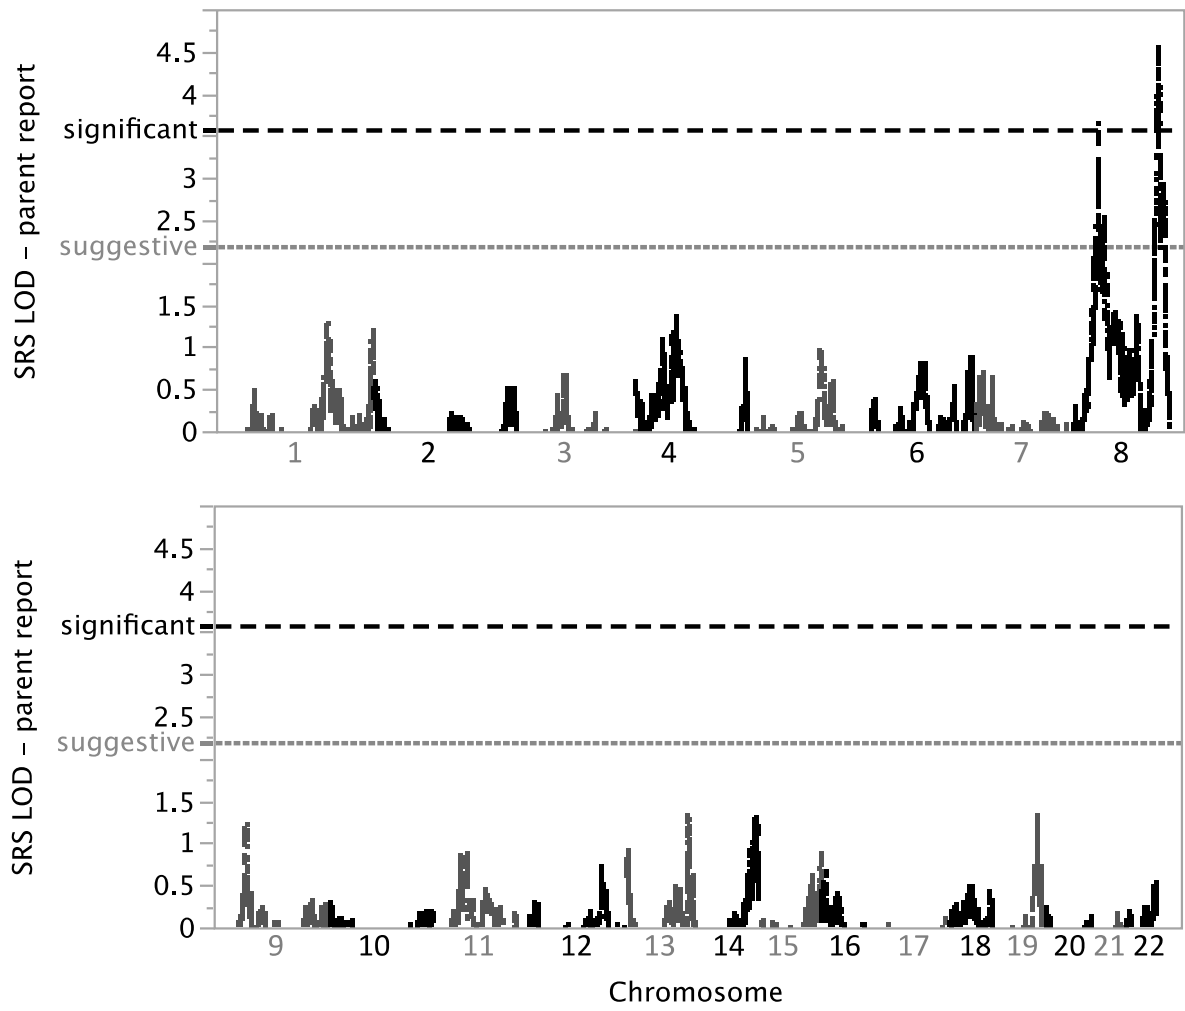

Figure SF3

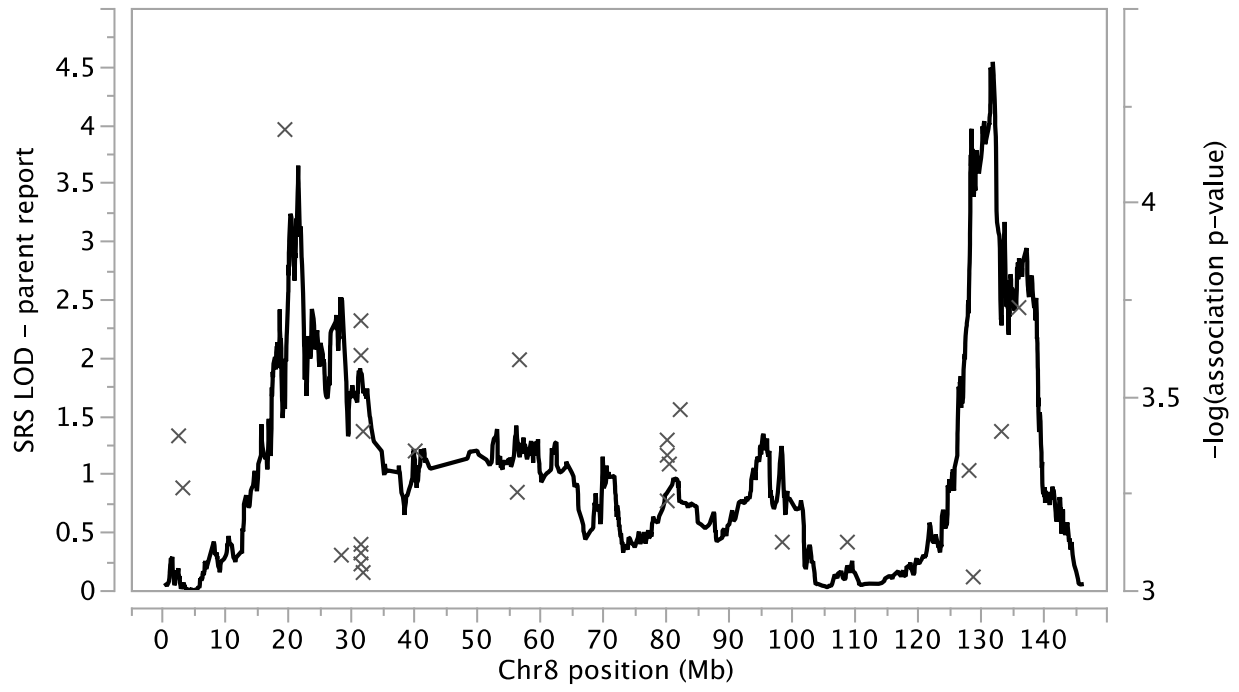

Supplement: appi.ajp.2014.14050576.ds002.figures.pdf [file appi.ajp.2014.14050576.ds002.figures.pdf]
