# Supplementary material for: Social Responsiveness, an Autism Endophenotype: Genomewide Significant Linkage to Two Regions on Chromosome 8
Source: Atypon-hosted journal article supplement (doi:10.1176/appi.ajp.2014.14050576), 2014-12-17
Supplement: appi.ajp.2014.14050576.ds003.st1.pdf [file appi.ajp.2014.14050576.ds003.st1.pdf]

SUPPLEMENTAL TABLES

Table ST1. Characteristics of 536 families from AGRE with SRS parent-report scores.

|            |         | SRS   |       |      |     |     |
|------------|---------|-------|-------|------|-----|-----|
|            |         | N     | mean  | SD   | min | max |
| Families   |         | 536   |       |      |     |     |
| Phenotyped |         | 1,388 |       |      |     |     |
| ASD        | All     | 932   | 105.2 | 32.8 | 9   | 184 |
|            | Males   | 729   | 106.5 | 32.4 | 9   | 184 |
|            | Females | 203   | 100.4 | 33.5 | 16  | 170 |
| Non-ASD    | All     | 455   | 24.6  | 25.0 | 0   | 156 |
| Siblings   | Males   | 202   | 28.1  | 28.0 | 0   | 156 |
|            | Females | 253   | 21.8  | 22.0 | 0   | 128 |
