# Supplementary material for: Social Responsiveness, an Autism Endophenotype: Genomewide Significant Linkage to Two Regions on Chromosome 8
Source: Atypon-hosted journal article supplement (doi:10.1176/appi.ajp.2014.14050576), 2014-12-17
Supplement: appi.ajp.2014.14050576.ds004.ST2.pdf [file appi.ajp.2014.14050576.ds004.ST2.pdf]

Table ST2. Genome-wide multi-point LOD scores for social responsiveness as a quantitative trait in 590 families from AGRE using teacher/parent reports.

```
CHR,CM,SNP,LOD
1,0.014,rs903914,-0.071
1,0.052,rs6665546,-0.087
1,0.058,rs10910061,-0.084
1,0.075,rs2843160,-0.073
1,0.133,rs2840532,-0.058
1,0.239,rs4531246,-0.056
1,0.328,rs10910078,-0.059
1,1.391,rs10909890,-0.050
1,1.463,rs4648384,-0.050
1,1.591,rs10797342,-0.043
1,1.761,rs10797368,-0.038
1,1.840,rs11583804,-0.036
1,1.844,rs878201,-0.037
1,1.858,rs2485945,-0.043
1,1.875,rs12044030,-0.051
1,2.046,rs2142569,-0.080
1,2.207,rs1569419,-0.071
1,2.237,rs926244,-0.068
1,2.260,rs2817168,-0.062
1,2.280,rs2993493,-0.046
1,2.364,rs2817178,-0.036
1,2.411,rs2817185,-0.033
1,2.468,rs1798246,-0.030
1,2.634,rs12124147,-0.052
1,2.637,rs2651906,-0.052
1,2.653,rs16823542,-0.053
1,2.721,rs2455118,-0.066
1,2.740,rs10797386,-0.073
1,2.768,rs3002685,-0.084
1,2.864,rs10909918,-0.084
1,3.029,rs4415513,-0.075
1,3.054,rs2483256,-0.081
1,3.128,rs4648489,-0.054
1,3.131,rs2493310,-0.042
1,3.151,rs868688,-0.056
1,3.173,rs2493275,-0.062
1,3.213,rs12024847,-0.073
1,3.260,rs1984069,-0.094
1,3.281,rs870171,-0.091
1,3.302,rs2493272,-0.088
1,3.475,rs4648505,-0.064
1,3.531,rs947344,-0.055
1,3.616,rs12119711,-0.051
1,3.634,rs4648524,-0.048
1,3.684,rs878063,-0.039
1,3.690,rs2821063,-0.038
1,3.803,rs7544357,-0.021
1,3.866,rs4648398,-0.017
1,3.906,rs4276857,-0.025
1,4.031,rs3765692,-0.059
1,4.055,rs3765703,-0.075
1,4.069,rs3765705,-0.078
1,4.173,rs3765761,-0.080
1,4.191,rs747827,-0.075
1,4.320,rs1181883,-0.065
1,4.329,rs1181877,-0.076
1,4.376,rs2799182,-0.056
```

1,4.523,rs6663840,-0.047  
1,4.640,rs10797348,-0.051  
1,4.710,rs7367066,-0.043  
1,4.735,rs12082157,-0.041  
1,5.328,rs12724233,-0.041  
1,5.341,rs7519458,-0.028  
1,5.350,rs6661168,-0.034  
1,5.352,rs4654482,-0.029  
1,5.358,rs11590912,-0.015  
1,5.367,rs6681347,-0.011  
1,5.425,rs12031557,-0.021  
1,5.443,rs11587331,-0.024  
1,5.724,rs4391636,-0.012  
1,5.729,rs12093951,-0.013  
1,5.793,rs4462110,-0.011  
1,5.794,rs6676961,-0.011  
1,5.812,rs10915428,-0.012  
1,5.847,rs7548756,-0.013  
1,6.155,rs6426402,-0.000  
1,6.178,rs10915478,-0.001  
1,6.235,rs12132422,-0.001  
1,6.296,rs966321,-0.001  
1,6.445,rs1762814,-0.000  
1,6.475,rs780587,-0.000  
1,6.585,rs11799990,-0.001  
1,6.620,rs1878052,-0.001  
1,6.700,rs6703696,-0.001  
1,6.823,rs6685798,-0.002  
1,6.948,rs12567277,-0.002  
1,6.968,rs164781,-0.002  
1,7.032,rs875807,-0.002  
1,7.108,rs10915577,-0.001  
1,7.170,rs11587129,-0.006  
1,7.190,rs2071995,-0.006  
1,7.205,rs763238,-0.006  
1,7.242,rs7518469,-0.005  
1,7.324,rs3820252,-0.009  
1,7.332,rs242044,-0.009  
1,7.367,rs3753702,-0.011  
1,7.438,rs12119789,-0.012  
1,7.549,rs4654607,-0.030  
1,7.627,rs2181699,-0.036  
1,7.700,rs7549868,-0.036  
1,7.826,rs6426446,-0.033  
1,7.877,rs10915668,-0.033  
1,7.900,rs11585268,-0.034  
1,7.944,rs10915683,-0.035  
1,7.961,rs12042532,-0.022  
1,7.965,rs9286971,-0.022  
1,8.007,rs12029491,-0.023  
1,8.017,rs10799145,-0.024  
1,8.028,rs3101219,-0.026  
1,8.064,rs6666330,-0.031  
1,8.084,rs7365286,-0.035  
1,8.125,rs9662885,-0.039  
1,8.226,rs10799157,-0.049  
1,8.249,rs1563792,-0.050  
1,8.325,rs2242157,-0.056  
1,8.486,rs6698702,-0.087  
1,8.523,rs7536712,-0.102  
1,8.618,rs12026938,-0.124

1,8.642,rs12135834,-0.128  
1,8.648,rs4475768,-0.081  
1,8.648,rs494046,-0.078  
1,8.667,rs630153,-0.066  
1,8.712,rs12141954,-0.068  
1,8.713,rs604664,-0.068  
1,8.720,rs557477,-0.069  
1,8.738,rs912988,-0.076  
1,8.754,rs11579000,-0.076  
1,8.773,rs12040942,-0.077  
1,8.886,rs6681674,-0.094  
1,9.004,rs3924260,-0.104  
1,9.134,rs1004125,-0.101  
1,9.152,rs11260698,-0.100  
1,9.217,rs10796400,-0.066  
1,9.268,rs7515958,-0.053  
1,9.348,rs1775421,-0.046  
1,9.350,rs1818038,-0.046  
1,9.358,rs1775416,-0.045  
1,9.412,rs707582,-0.036  
1,9.431,rs9439605,-0.033  
1,9.439,rs945322,-0.032  
1,9.487,rs971816,-0.025  
1,9.493,rs709184,-0.036  
1,9.499,rs707590,-0.030  
1,9.611,rs770693,-0.029  
1,9.752,rs4129514,-0.041  
1,9.899,rs1698976,-0.041  
1,9.926,rs548726,-0.039  
1,10.154,rs551207,-0.027  
1,10.531,rs546526,-0.014  
1,10.706,rs1295087,-0.012  
1,10.949,rs3789541,-0.004  
1,11.122,rs2281303,-0.000  
1,11.152,rs1883767,-0.000  
1,11.323,rs9435102,0.001  
1,11.371,rs1883604,0.001  
1,11.386,rs731975,0.000  
1,11.481,rs1802353,0.001  
1,11.540,rs4908874,0.002  
1,11.626,rs6696861,0.001  
1,11.802,rs2103673,0.004  
1,11.903,rs4908898,0.000  
1,12.000,rs12041318,-0.003  
1,12.012,rs449250,-0.004  
1,12.021,rs12069069,-0.004  
1,12.075,rs6688732,-0.003  
1,12.096,rs11586867,-0.004  
1,12.285,rs4243823,-0.001  
1,12.616,rs2187901,0.001  
1,12.660,rs2071917,0.001  
1,12.777,rs17030322,0.003  
1,12.783,rs17349921,0.003  
1,12.856,rs970973,0.006  
1,12.858,rs1894647,0.003  
1,12.880,rs6680365,0.008  
1,12.985,rs6701870,0.009  
1,13.007,rs6577430,0.009  
1,13.039,rs12409413,0.017  
1,13.086,rs7543711,0.016  
1,13.140,rs1029322,0.013

1,13.170,rs845246,0.011  
1,13.419,rs845251,0.001  
1,13.430,rs12088178,0.001  
1,13.452,rs9988557,0.001  
1,13.574,rs1193185,-0.003  
1,13.580,rs17030993,-0.003  
1,13.600,rs1193167,-0.003  
1,13.603,rs6577449,-0.003  
1,13.605,rs12407666,-0.003  
1,13.609,rs1193158,-0.000  
1,13.610,rs4908654,-0.000  
1,13.621,rs4317829,-0.000  
1,13.658,rs17027053,-0.001  
1,13.669,rs4908473,-0.001  
1,13.690,rs3011936,-0.000  
1,13.698,rs2301488,-0.001  
1,13.715,rs707455,-0.001  
1,13.758,rs228648,-0.004  
1,13.786,rs679563,-0.008  
1,13.896,rs225133,-0.011  
1,14.024,rs7529511,-0.006  
1,14.031,rs9434617,-0.006  
1,14.031,rs9434618,-0.005  
1,14.031,rs6701300,-0.005  
1,14.059,rs17032281,-0.004  
1,14.088,rs6663882,-0.003  
1,14.128,rs390468,-0.002  
1,14.137,rs506403,-0.002  
1,14.152,rs299499,-0.001  
1,14.212,rs438895,-0.002  
1,14.262,rs1466654,-0.003  
1,14.826,rs17383360,-0.012  
1,14.974,rs2038903,-0.015  
1,14.987,rs2781064,-0.015  
1,15.073,rs9434652,-0.032  
1,15.083,rs6688840,-0.036  
1,15.096,rs2274328,-0.042  
1,15.135,rs6577546,-0.065  
1,15.142,rs17032942,-0.071  
1,15.161,rs2895997,-0.086  
1,15.164,rs7516862,-0.088  
1,15.174,rs7530465,-0.091  
1,15.181,rs7537425,-0.127  
1,15.245,rs1612895,-0.101  
1,15.267,rs1327257,-0.090  
1,15.297,rs6697376,-0.081  
1,15.362,rs12128240,-0.084  
1,15.377,rs797252,-0.087  
1,15.392,rs4908527,-0.090  
1,15.407,rs4908817,-0.088  
1,15.450,rs1009940,-0.098  
1,15.507,rs2268169,-0.122  
1,15.510,rs6688832,-0.124  
1,15.579,rs916380,-0.104  
1,15.618,rs4465231,-0.096  
1,15.634,rs9726385,-0.093  
1,15.807,rs926249,-0.056  
1,15.829,rs17377604,-0.053  
1,15.865,rs4908842,-0.041  
1,15.986,rs2075972,-0.091  
1,16.022,rs4908851,-0.096

1,16.115,rs2275457,-0.073  
1,16.197,rs9729149,-0.072  
1,16.306,rs6688312,-0.066  
1,16.499,rs10864418,-0.062  
1,16.610,rs12034064,-0.068  
1,16.610,rs10864424,-0.068  
1,16.611,rs4926491,-0.069  
1,16.620,rs12755956,-0.069  
1,16.646,rs4240896,-0.070  
1,16.655,rs12075554,-0.070  
1,16.679,rs1933734,-0.061  
1,16.746,rs10492969,-0.051  
1,17.146,rs12741973,-0.052  
1,17.268,rs3790630,-0.069  
1,17.332,rs17035482,-0.068  
1,17.543,rs516243,-0.052  
1,17.567,rs4845948,-0.050  
1,17.585,rs7514751,-0.054  
1,17.725,rs4845953,-0.048  
1,17.771,rs205483,-0.063  
1,17.773,rs205484,-0.064  
1,17.815,rs205488,-0.072  
1,17.983,rs1776220,-0.095  
1,18.030,rs539790,-0.102  
1,18.033,rs634478,-0.103  
1,18.082,rs12140279,-0.105  
1,18.153,rs7543046,-0.107  
1,18.161,rs1280988,-0.107  
1,18.198,rs1280996,-0.131  
1,18.317,rs10864479,-0.153  
1,18.379,rs12748162,-0.156  
1,18.514,rs11121663,-0.145  
1,18.544,rs2003046,-0.142  
1,18.641,rs11121675,-0.117  
1,19.765,rs2982373,-0.139  
1,19.840,rs909836,-0.129  
1,20.008,rs12058244,-0.111  
1,20.132,rs11585441,-0.112  
1,20.150,rs3124627,-0.113  
1,20.455,rs11808316,-0.190  
1,20.558,rs761087,-0.216  
1,20.648,rs17037122,-0.220  
1,20.706,rs9614,-0.250  
1,20.724,rs12139487,-0.264  
1,20.777,rs2336030,-0.336  
1,20.866,rs6687381,-0.448  
1,20.875,rs2336034,-0.454  
1,20.895,rs4846028,-0.464  
1,20.943,rs12095517,-0.509  
1,20.958,rs4073574,-0.515  
1,21.204,rs198388,-0.516  
1,21.300,rs7554547,-0.569  
1,21.302,rs2273289,-0.578  
1,21.303,rs2295281,-0.587  
1,21.304,rs4514248,-0.583  
1,21.306,rs6690493,-0.621  
1,21.307,rs6541014,-0.633  
1,21.307,rs501525,-0.619  
1,21.308,rs535068,-0.612  
1,21.308,rs3766735,-0.596  
1,21.308,rs631272,-0.565

1,21.309,rs976881,-0.539  
1,21.310,rs1201157,-0.527  
1,21.329,rs1061631,-0.515  
1,21.342,rs7552664,-0.489  
1,21.344,rs7550488,-0.488  
1,21.414,rs3765339,-0.451  
1,21.792,rs6541025,-0.408  
1,21.793,rs7521256,-0.408  
1,21.797,rs2038118,-0.372  
1,21.831,rs4997711,-0.364  
1,21.882,rs4846127,-0.332  
1,21.892,rs4394668,-0.335  
1,21.903,rs3010928,-0.339  
1,21.910,rs3010931,-0.335  
1,21.923,rs4845911,-0.331  
1,21.965,rs11121955,-0.309  
1,22.022,rs10779772,-0.336  
1,22.106,rs2359533,-0.391  
1,22.184,rs4845917,-0.391  
1,22.232,rs11810835,-0.402  
1,23.810,rs3013105,-0.800  
1,23.836,rs3845608,-0.816  
1,23.861,rs3013045,-0.831  
1,23.911,rs2999899,-0.870  
1,24.033,rs12034380,-0.916  
1,24.101,rs355013,-0.934  
1,24.178,rs876931,-0.899  
1,24.184,rs11588651,-0.844  
1,24.193,rs7515525,-0.770  
1,24.480,rs1203651,-0.844  
1,24.513,rs760914,-0.845  
1,24.520,rs2281164,-0.844  
1,24.553,rs2697971,-0.868  
1,24.576,rs982510,-0.887  
1,24.644,rs12407665,-0.841  
1,24.658,rs2744656,-0.852  
1,24.663,rs9287293,-0.851  
1,24.699,rs6429800,-0.850  
1,24.712,rs6697531,-0.825  
1,24.744,rs7542884,-0.779  
1,24.803,rs12043211,-0.757  
1,24.852,rs4661462,-0.769  
1,24.869,rs6681501,-0.773  
1,24.965,rs2359908,-0.791  
1,25.014,rs10737918,-0.800  
1,25.044,rs742545,-0.818  
1,25.142,rs7515917,-0.892  
1,25.156,rs16853600,-0.922  
1,25.166,rs2359942,-0.902  
1,25.279,rs12568548,-0.835  
1,25.314,rs517269,-0.813  
1,25.514,rs10928060,-0.708  
1,25.578,rs1538534,-0.668  
1,25.595,rs1416624,-0.701  
1,25.650,rs2149507,-0.689  
1,25.698,rs2789746,-0.716  
1,25.761,rs10754853,-0.676  
1,25.824,rs943918,-0.598  
1,25.825,rs12141361,-0.597  
1,25.977,rs4661496,-0.557  
1,26.073,rs10803285,-0.549

1,26.116,rs3892594,-0.566  
1,26.180,rs4385705,-0.578  
1,26.244,rs7527439,-0.587  
1,26.589,rs761191,-0.575  
1,26.711,rs2871581,-0.583  
1,26.948,rs6429675,-0.564  
1,26.965,rs6661767,-0.562  
1,27.020,rs732469,-0.580  
1,27.177,rs3845590,-0.620  
1,27.248,rs11585327,-0.615  
1,27.277,rs804129,-0.574  
1,27.288,rs3845596,-0.626  
1,27.294,rs4661539,-0.659  
1,27.445,rs4661548,-0.631  
1,27.512,rs7531035,-0.584  
1,27.521,rs4661310,-0.592  
1,27.544,rs2311975,-0.641  
1,27.556,rs6429703,-0.637  
1,27.579,rs6684496,-0.603  
1,27.612,rs6704367,-0.586  
1,27.616,rs10927657,-0.585  
1,27.667,rs4661572,-0.535  
1,27.707,rs3752934,-0.478  
1,27.738,rs2235789,-0.436  
1,27.932,rs10803369,-0.273  
1,27.950,rs767255,-0.265  
1,27.957,rs1752026,-0.269  
1,28.000,rs6676098,-0.289  
1,28.031,rs10927764,-0.302  
1,28.044,rs536364,-0.289  
1,28.067,rs10803378,-0.283  
1,28.163,rs2473358,-0.267  
1,28.256,rs733887,-0.236  
1,28.328,rs555015,-0.200  
1,28.466,rs1052571,-0.144  
1,28.868,rs10927848,-0.111  
1,28.930,rs11576404,-0.104  
1,29.227,rs848189,-0.078  
1,29.434,rs9442235,-0.061  
1,29.436,rs11801060,-0.061  
1,29.563,rs11260745,-0.059  
1,29.649,rs11260930,-0.058  
1,30.051,rs4661747,-0.053  
1,30.128,rs279788,-0.052  
1,30.185,rs156851,-0.050  
1,31.025,rs4920355,-0.056  
1,31.131,rs2871775,-0.055  
1,31.138,rs978528,-0.055  
1,31.250,rs2647185,-0.053  
1,31.307,rs1005753,-0.052  
1,31.388,rs2454170,-0.048  
1,31.425,rs2935923,-0.024  
1,31.472,rs2977272,-0.020  
1,31.480,rs2977283,-0.016  
1,31.498,rs16823950,-0.008  
1,31.500,rs2977290,-0.008  
1,31.503,rs10127662,-0.008  
1,31.505,rs12091488,-0.008  
1,31.522,rs2977310,-0.033  
1,31.624,rs7548900,-0.017  
1,31.686,rs11203366,-0.011

1,31.706,rs1748020,-0.012  
1,31.797,rs6695214,-0.017  
1,32.035,rs2247863,-0.016  
1,32.069,rs4920374,-0.016  
1,32.097,rs2256114,-0.017  
1,32.152,rs4920380,-0.017  
1,32.276,rs10888046,-0.009  
1,32.324,rs6657353,-0.010  
1,32.367,rs2134482,-0.011  
1,32.397,rs7522419,-0.011  
1,32.433,rs11581535,-0.008  
1,32.439,rs260514,-0.009  
1,32.654,rs694214,-0.025  
1,32.701,rs647325,-0.027  
1,32.729,rs647619,-0.028  
1,32.927,rs661977,-0.030  
1,32.999,rs1192630,-0.033  
1,33.023,rs6685120,-0.033  
1,33.093,rs1192617,-0.028  
1,33.163,rs875294,-0.026  
1,33.190,rs4532860,-0.024  
1,33.517,rs4920428,-0.014  
1,33.520,rs12739708,-0.014  
1,33.524,rs9659104,-0.014  
1,33.571,rs4920295,-0.017  
1,33.625,rs12072266,-0.012  
1,33.668,rs9725656,-0.014  
1,33.723,rs9329469,-0.019  
1,33.765,rs16861648,-0.024  
1,33.769,rs9659675,-0.025  
1,33.808,rs11802233,-0.043  
1,33.845,rs9726406,-0.048  
1,33.891,rs10907289,-0.050  
1,33.894,rs9727616,-0.051  
1,33.932,rs12023073,-0.067  
1,34.084,rs17436172,-0.070  
1,34.099,rs1399437,-0.067  
1,34.153,rs109490,-0.058  
1,34.188,rs223179,-0.057  
1,34.273,rs11801569,-0.062  
1,34.458,rs6663855,-0.042  
1,34.584,rs542634,-0.046  
1,34.709,rs10465918,-0.048  
1,34.743,rs7538502,-0.049  
1,34.824,rs7512723,-0.045  
1,34.968,rs1850750,-0.039  
1,35.156,rs11261017,-0.033  
1,35.207,rs10907314,-0.027  
1,35.353,rs2816025,-0.017  
1,35.381,rs2816030,-0.018  
1,35.462,rs2745327,-0.014  
1,35.483,rs4920514,-0.014  
1,35.526,rs11261034,-0.014  
1,35.617,rs7549273,-0.015  
1,35.633,rs4920515,-0.015  
1,35.716,rs2816065,-0.017  
1,36.488,rs2236835,-0.018  
1,36.746,rs2743208,-0.018  
1,36.753,rs585075,-0.019  
1,36.753,rs12760805,-0.019  
1,36.781,rs501080,-0.024



1,36.809,rs2236817,-0.016  
1,36.826,rs2236805,-0.010  
1,36.829,rs9439731,-0.005  
1,36.871,rs1160680,-0.007  
1,36.887,rs2841055,-0.009  
1,36.911,rs2789334,-0.013  
1,36.916,rs2841087,-0.014  
1,37.083,rs7549129,-0.014  
1,37.086,rs7533384,-0.014  
1,37.303,rs6686865,-0.008  
1,37.305,rs6684577,-0.008  
1,37.324,rs4912075,-0.019  
1,37.328,rs9426794,-0.019  
1,37.363,rs7531434,-0.013  
1,37.454,rs9729157,-0.014  
1,37.461,rs2073098,-0.014  
1,37.473,rs214338,-0.015  
1,37.480,rs6663076,-0.017  
1,37.552,rs10917477,-0.044  
1,37.555,rs12123337,-0.044  
1,37.587,rs4508039,-0.050  
1,37.705,rs860847,-0.063  
1,37.907,rs3813987,-0.085  
1,37.932,rs3934191,-0.080  
1,37.956,rs4912019,-0.093  
1,38.002,rs4326647,-0.124  
1,38.092,rs1266437,-0.213  
1,38.096,rs10917536,-0.213  
1,38.125,rs12140071,-0.221  
1,38.183,rs2314759,-0.239  
1,38.188,rs7513083,-0.250  
1,38.189,rs7513369,-0.252  
1,38.193,rs1317209,-0.268  
1,38.203,rs17396847,-0.305  
1,38.212,rs10799839,-0.308  
1,38.235,rs4509550,-0.314  
1,38.333,rs4654903,-0.318  
1,38.424,rs1111872,-0.316  
1,38.447,rs2233688,-0.315  
1,38.447,rs2233687,-0.315  
1,38.546,rs6672057,-0.312  
1,38.574,rs3753827,-0.309  
1,38.744,rs617363,-0.356  
1,38.869,rs599367,-0.289  
1,38.877,rs7551550,-0.253  
1,38.910,rs623784,-0.217  
1,38.939,rs631134,-0.180  
1,38.991,rs876171,-0.144  
1,39.024,rs2301478,-0.135  
1,39.058,rs17354867,-0.125  
1,39.083,rs2097532,-0.117  
1,39.111,rs7541616,-0.091  
1,39.136,rs10916749,-0.086  
1,39.146,rs16823800,-0.088  
1,39.151,rs2223225,-0.090  
1,39.213,rs230178,-0.109  
1,39.214,rs230177,-0.109  
1,39.238,rs10916780,-0.117  
1,39.281,rs7537381,-0.136  
1,39.306,rs11799849,-0.140  
1,39.392,rs616145,-0.129

1,39.424,rs472055,-0.175  
1,39.429,rs1890005,-0.180  
1,39.507,rs1043424,-0.193  
1,39.532,rs10916848,-0.209  
1,39.548,rs628265,-0.213  
1,39.552,rs683936,-0.218  
1,40.143,rs1067242,-0.173  
1,40.174,rs3026845,-0.171  
1,40.184,rs84853,-0.170  
1,40.203,rs4654918,-0.165  
1,40.262,rs213006,-0.154  
1,40.281,rs16825276,-0.153  
1,40.336,rs4614227,-0.148  
1,40.586,rs1827293,-0.129  
1,40.645,rs1780321,-0.124  
1,40.669,rs12127343,-0.122  
1,40.682,rs3767150,-0.127  
1,40.685,rs1780320,-0.130  
1,40.699,rs10917023,-0.131  
1,40.721,rs12142081,-0.131  
1,40.737,rs829398,-0.134  
1,40.752,rs829387,-0.132  
1,40.762,rs1018102,-0.132  
1,40.820,rs13374837,-0.134  
1,40.821,rs2010397,-0.134  
1,40.830,rs4654771,-0.130  
1,40.917,rs12049408,-0.090  
1,40.944,rs3768574,-0.078  
1,40.948,rs2473277,-0.075  
1,41.020,rs2744721,-0.067  
1,41.024,rs2807356,-0.073  
1,41.036,rs10753531,-0.096  
1,41.058,rs2744738,-0.095  
1,41.082,rs736473,-0.106  
1,41.100,rs10799746,-0.119  
1,41.108,rs4655040,-0.121  
1,41.139,rs6682619,-0.130  
1,41.164,rs4655059,-0.118  
1,41.264,rs2078450,-0.078  
1,41.684,rs766910,-0.065  
1,41.705,rs209709,-0.063  
1,42.031,rs587585,-0.055  
1,42.084,rs652826,-0.054  
1,42.185,rs7549747,-0.051  
1,42.380,rs734445,-0.037  
1,42.480,rs6673115,-0.034  
1,42.547,rs893964,-0.032  
1,42.550,rs1561625,-0.033  
1,42.581,rs4654814,-0.035  
1,42.628,rs2817909,-0.035  
1,42.768,rs2869511,-0.035  
1,42.806,rs1208932,-0.026  
1,43.015,rs2075993,-0.024  
1,43.042,rs3218121,-0.024  
1,43.099,rs10917395,-0.020  
1,43.112,rs2683061,-0.015  
1,43.126,rs2864889,-0.009  
1,43.215,rs6673098,-0.001  
1,43.296,rs10917420,0.000  
1,43.377,rs11714,0.000  
1,43.701,rs4648930,0.000

1,43.701,rs4648931,0.000  
1,43.734,rs4649183,0.000  
1,43.736,rs6700245,0.000  
1,43.755,rs3934861,0.001  
1,43.781,rs11577442,0.001  
1,43.815,rs10903034,0.005  
1,43.860,rs11587500,0.005  
1,43.871,rs870549,0.002  
1,44.005,rs12080352,0.023  
1,44.068,rs7527465,0.032  
1,44.210,rs195729,0.037  
1,44.235,rs195712,0.049  
1,44.288,rs11801547,0.055  
1,44.337,rs4648998,0.059  
1,44.364,rs10903095,0.055  
1,44.373,rs4649002,0.053  
1,44.488,rs11249163,0.038  
1,44.501,rs1002706,0.035  
1,44.559,rs3131513,0.027  
1,44.570,rs6663310,0.025  
1,44.571,rs7553295,0.025  
1,44.582,rs6662768,0.022  
1,44.591,rs7551188,0.021  
1,44.603,rs1609996,0.035  
1,44.605,rs311484,0.069  
1,44.623,rs16830307,0.070  
1,44.626,rs387240,0.070  
1,44.628,rs1702312,0.070  
1,44.636,rs4649060,0.060  
1,44.639,rs12031599,0.062  
1,44.643,rs380337,0.066  
1,44.646,rs12081177,0.065  
1,44.651,rs11588172,0.063  
1,44.656,rs803313,0.036  
1,44.669,rs7530932,0.040  
1,44.693,rs742391,0.044  
1,44.792,rs10903129,0.016  
1,44.845,rs4659356,0.006  
1,44.945,rs3767880,0.008  
1,44.972,rs2072748,0.013  
1,44.994,rs6696298,0.005  
1,45.093,rs12037513,0.003  
1,45.227,rs4659404,0.009  
1,45.338,rs10794522,0.018  
1,45.447,rs12096059,0.015  
1,45.448,rs11247894,0.015  
1,45.557,rs12137896,0.015  
1,45.643,rs12741800,0.014  
1,45.718,rs1002487,0.012  
1,45.784,rs190737,0.010  
1,45.805,rs6598858,0.019  
1,45.834,rs17162247,0.019  
1,45.876,rs4970479,0.021  
1,46.307,rs11247599,0.034  
1,46.369,rs12742376,0.033  
1,46.381,rs4970469,0.032  
1,46.407,rs537951,0.030  
1,46.419,rs484677,0.030  
1,46.535,rs11247639,0.015  
1,46.552,rs2504786,0.015  
1,46.657,rs12146138,0.026

1,46.692,rs4908343,0.030  
1,46.747,rs10902662,0.036  
1,46.758,rs12743229,0.038  
1,46.796,rs1767523,0.043  
1,46.923,rs3766400,0.041  
1,46.972,rs1010082,0.041  
1,47.109,rs6598919,0.033  
1,47.240,rs508772,0.037  
1,47.704,rs678849,0.069  
1,47.734,rs508448,0.072  
1,47.753,rs157198,0.088  
1,47.941,rs12045777,0.073  
1,48.109,rs7524056,0.046  
1,48.110,rs2235937,0.046  
1,48.122,rs2007350,0.045  
1,48.173,rs1886651,0.047  
1,48.182,rs4654337,0.047  
1,48.183,rs212306,0.047  
1,48.210,rs912772,0.032  
1,48.213,rs7529591,0.033  
1,48.222,rs6685390,0.035  
1,48.246,rs11804085,0.032  
1,48.252,rs6694109,0.032  
1,48.256,rs6426365,0.043  
1,48.309,rs7418865,0.044  
1,48.787,rs387232,0.092  
1,48.794,rs271392,0.092  
1,48.797,rs10753234,0.091  
1,48.877,rs920600,0.085  
1,48.922,rs12058382,0.090  
1,48.930,rs17262748,0.092  
1,48.997,rs12748731,0.108  
1,49.007,rs17341224,0.111  
1,49.049,rs1448339,0.126  
1,49.067,rs7513406,0.133  
1,49.090,rs2377151,0.150  
1,49.101,rs752685,0.158  
1,49.118,rs873894,0.156  
1,49.170,rs10798927,0.146  
1,49.310,rs10753300,0.113  
1,49.316,rs1503772,0.114  
1,49.332,rs1149064,0.116  
1,49.342,rs369715,0.116  
1,49.380,rs7541381,0.105  
1,49.413,rs7530575,0.089  
1,49.477,rs4245643,0.087  
1,49.590,rs7516871,0.089  
1,49.669,rs462649,0.087  
1,49.931,rs10915065,0.081  
1,50.026,rs12057521,0.080  
1,50.071,rs7528451,0.058  
1,50.446,rs650676,0.034  
1,50.469,rs686393,0.035  
1,50.590,rs744528,0.035  
1,50.600,rs1001704,0.037  
1,50.898,rs12144776,0.044  
1,51.001,rs9628644,0.052  
1,51.274,rs10914150,0.070  
1,51.376,rs1188414,0.074  
1,51.588,rs2147081,0.100  
1,51.656,rs1188444,0.109

1,51.740,rs1188394,0.062  
1,51.740,rs4949302,0.061  
1,51.746,rs10914217,0.055  
1,51.747,rs4551635,0.055  
1,51.748,rs2488230,0.053  
1,51.749,rs2488233,0.051  
1,51.751,rs2488238,0.046  
1,51.753,rs10753239,0.047  
1,51.754,rs7529390,0.048  
1,51.756,rs6680835,0.051  
1,52.020,rs10493048,0.059  
1,52.032,rs10914436,0.061  
1,52.053,rs4949213,0.063  
1,52.178,rs4949459,0.092  
1,52.197,rs10493049,0.077  
1,52.255,rs6656287,0.077  
1,52.290,rs11578323,0.086  
1,52.366,rs648718,0.082  
1,52.601,rs695161,0.060  
1,52.693,rs16834981,0.054  
1,52.696,rs10914555,0.054  
1,52.825,rs6678903,0.047  
1,52.876,rs359955,0.034  
1,52.932,rs644879,0.041  
1,52.979,rs16835176,0.039  
1,53.088,rs194663,0.039  
1,53.199,rs84314,0.038  
1,53.225,rs11582222,0.043  
1,53.343,rs4361958,0.071  
1,53.572,rs6661037,0.124  
1,53.720,rs10737370,0.115  
1,53.904,rs10798959,0.133  
1,54.042,rs923882,0.132  
1,54.079,rs6701268,0.131  
1,54.112,rs12727575,0.129  
1,54.170,rs1874045,0.124  
1,54.447,rs732889,0.120  
1,54.525,rs16835734,0.122  
1,54.535,rs562189,0.122  
1,54.653,rs580682,0.128  
1,54.700,rs2583453,0.129  
1,54.772,rs479938,0.129  
1,54.790,rs524787,0.128  
1,54.832,rs6425838,0.150  
1,54.833,rs1441521,0.150  
1,55.185,rs10914802,0.086  
1,55.216,rs12568620,0.080  
1,55.279,rs1570089,0.067  
1,55.351,rs6697504,0.046  
1,55.371,rs10914816,0.042  
1,55.378,rs7555410,0.041  
1,55.493,rs549048,0.031  
1,55.509,rs483083,0.030  
1,55.517,rs545337,0.030  
1,55.592,rs12127677,0.028  
1,55.614,rs7551631,0.027  
1,55.666,rs12755908,0.034  
1,55.689,rs12406216,0.034  
1,55.693,rs2994598,0.034  
1,55.710,rs297791,0.036  
1,55.716,rs6698707,0.037

1,55.745,rs12128858,0.042  
1,55.851,rs2294193,0.067  
1,55.866,rs2294190,0.072  
1,55.870,rs1883109,0.074  
1,56.029,rs6661959,0.110  
1,56.080,rs728447,0.130  
1,56.116,rs14103,0.137  
1,56.116,rs4653107,0.137  
1,56.123,rs7541937,0.160  
1,56.133,rs7555884,0.162  
1,56.150,rs11263859,0.154  
1,56.234,rs499153,0.147  
1,56.315,rs1203138,0.153  
1,56.324,rs1203148,0.153  
1,57.417,rs768000,0.274  
1,57.567,rs795047,0.293  
1,57.791,rs6693113,0.297  
1,57.950,rs4653184,0.293  
1,58.052,rs525798,0.309  
1,58.169,rs484017,0.265  
1,58.270,rs513823,0.241  
1,58.471,rs3767065,0.197  
1,58.576,rs7517274,0.180  
1,58.615,rs550115,0.183  
1,58.650,rs535620,0.185  
1,58.717,rs3820274,0.179  
1,58.882,rs2859741,0.178  
1,58.945,rs6702349,0.186  
1,58.954,rs218422,0.188  
1,59.043,rs11263977,0.168  
1,59.204,rs998176,0.170  
1,59.578,rs949586,0.209  
1,59.612,rs4653277,0.227  
1,59.684,rs1004766,0.204  
1,59.845,rs10493079,0.201  
1,59.847,rs16824119,0.201  
1,59.975,rs2492301,0.191  
1,60.279,rs4074961,0.191  
1,60.324,rs10908366,0.191  
1,60.332,rs6687329,0.192  
1,60.344,rs10908367,0.193  
1,60.398,rs3790623,0.196  
1,60.428,rs12121777,0.183  
1,60.448,rs631432,0.165  
1,60.520,rs4308943,0.149  
1,60.868,rs4634868,0.113  
1,60.874,rs6600436,0.095  
1,60.895,rs11211383,0.094  
1,61.018,rs486563,0.081  
1,61.019,rs1108182,0.081  
1,61.019,rs544700,0.081  
1,61.037,rs2615811,0.080  
1,61.166,rs10889449,0.035  
1,61.205,rs745526,0.025  
1,61.213,rs6683126,0.024  
1,61.223,rs6685558,0.025  
1,61.253,rs872595,0.032  
1,61.300,rs10789332,0.045  
1,61.303,rs6698091,0.058  
1,61.413,rs11210569,0.069  
1,61.477,rs17537940,0.058

1,61.489,rs7521522,0.056  
1,61.578,rs2256357,0.039  
1,61.582,rs1932362,0.038  
1,61.593,rs882000,0.035  
1,61.615,rs2247965,0.033  
1,61.616,rs12564999,0.033  
1,61.699,rs2184611,0.025  
1,61.743,rs11210966,0.021  
1,61.790,rs10789446,0.010  
1,61.791,rs4970603,0.015  
1,61.806,rs1001450,0.008  
1,61.822,rs3011179,0.010  
1,61.839,rs2985774,0.011  
1,61.928,rs730219,0.014  
1,62.052,rs679143,0.024  
1,62.123,rs2209477,0.046  
1,62.164,rs9326146,0.046  
1,62.289,rs2147914,0.027  
1,62.373,rs12035946,0.013  
1,62.405,rs4512638,0.008  
1,62.448,rs6696013,0.005  
1,62.481,rs10888621,0.004  
1,62.598,rs9659165,0.003  
1,62.604,rs260974,0.003  
1,62.618,rs4660401,0.003  
1,62.671,rs11205665,0.003  
1,63.209,rs4660762,0.007  
1,63.409,rs2243761,0.009  
1,63.494,rs784622,0.011  
1,63.571,rs784600,0.013  
1,63.649,rs17561720,0.017  
1,63.683,rs704782,0.019  
1,63.720,rs704787,0.021  
1,63.866,rs230284,0.017  
1,63.944,rs230271,0.021  
1,64.030,rs10489534,0.021  
1,64.176,rs12127002,0.021  
1,64.246,rs3131706,0.014  
1,64.778,rs7529068,0.014  
1,65.052,rs2284446,0.015  
1,65.073,rs10489430,0.016  
1,65.138,rs209914,0.017  
1,65.175,rs11207870,0.016  
1,65.201,rs10889285,0.016  
1,65.267,rs3013462,0.015  
1,65.335,rs16827275,0.018  
1,65.383,rs2982500,0.017  
1,65.392,rs2982502,0.017  
1,65.392,rs3969615,0.017  
1,65.507,rs4660438,0.012  
1,65.545,rs7520333,0.012  
1,65.662,rs2274956,0.015  
1,65.674,rs10158384,0.012  
1,65.714,rs4660464,0.005  
1,65.731,rs4660468,0.002  
1,65.743,rs963377,0.001  
1,65.753,rs4660471,0.001  
1,65.768,rs913382,0.001  
1,65.807,rs10789250,0.001  
1,65.825,rs6671627,0.002  
1,65.838,rs4440845,0.001

1,65.907,rs11802778,0.001  
1,66.060,rs4660527,0.000  
1,66.068,rs7539614,0.000  
1,66.074,rs1317557,0.000  
1,66.077,rs4660192,0.000  
1,66.107,rs12402711,0.003  
1,66.135,rs12142181,0.004  
1,66.145,rs2483692,0.005  
1,66.160,rs6690839,0.005  
1,66.168,rs12718439,0.005  
1,66.208,rs640688,0.005  
1,66.355,rs6703365,0.008  
1,66.403,rs765040,0.014  
1,66.418,rs17373758,0.017  
1,66.440,rs16828739,0.021  
1,66.441,rs9943167,0.014  
1,66.490,rs883062,0.018  
1,66.640,rs2494366,0.021  
1,66.785,rs1016544,0.024  
1,66.849,rs11210691,0.018  
1,66.852,rs6688151,0.018  
1,66.934,rs11581921,0.018  
1,66.947,rs2816594,0.019  
1,67.013,rs11210729,0.020  
1,67.058,rs2792600,0.020  
1,67.066,rs16830039,0.021  
1,67.136,rs7413414,0.022  
1,67.157,rs9326132,0.024  
1,67.280,rs626842,0.049  
1,67.328,rs680343,0.047  
1,67.354,rs622762,0.046  
1,67.388,rs11210824,0.044  
1,67.403,rs2784466,0.044  
1,67.416,rs7527092,0.044  
1,67.629,rs6695915,0.045  
1,67.841,rs3828139,0.058  
1,67.916,rs3011225,0.060  
1,68.053,rs17402782,0.067  
1,68.158,rs7523468,0.072  
1,68.169,rs16831558,0.072  
1,68.242,rs6698333,0.073  
1,68.288,rs6690437,0.074  
1,68.444,rs17414912,0.092  
1,68.483,rs10489168,0.091  
1,68.527,rs6699067,0.088  
1,68.663,rs619199,0.070  
1,68.666,rs6429539,0.070  
1,68.700,rs3866643,0.068  
1,68.703,rs11210996,0.068  
1,68.706,rs1340647,0.069  
1,68.792,rs9804150,0.079  
1,68.801,rs7354900,0.082  
1,68.812,rs6429541,0.076  
1,68.832,rs6704115,0.074  
1,68.865,rs7554123,0.093  
1,68.874,rs11211012,0.099  
1,68.893,rs270764,0.076  
1,68.900,rs755597,0.075  
1,69.104,rs3863641,0.026  
1,69.138,rs3766246,0.025  
1,69.439,rs12022855,0.015



1,69.544,rs614486,0.024  
1,69.665,rs720413,0.029  
1,69.769,rs13373822,0.034  
1,70.054,rs9727862,0.023  
1,70.061,rs1502908,0.023  
1,70.299,rs2245122,0.031  
1,70.340,rs13373881,0.034  
1,70.829,rs2405922,0.082  
1,71.039,rs515146,0.104  
1,71.135,rs606852,0.113  
1,71.160,rs518063,0.106  
1,71.192,rs12028069,0.099  
1,71.241,rs2457066,0.101  
1,71.302,rs4554761,0.106  
1,71.315,rs11211576,0.120  
1,71.321,rs2506987,0.126  
1,71.322,rs931937,0.126  
1,71.331,rs12402179,0.128  
1,71.364,rs4926966,0.152  
1,71.398,rs1561572,0.181  
1,71.406,rs1561573,0.189  
1,71.418,rs3850885,0.195  
1,71.429,rs4927069,0.198  
1,71.442,rs12024706,0.199  
1,71.524,rs11211632,0.195  
1,71.550,rs11584659,0.190  
1,71.550,rs17103991,0.190  
1,71.581,rs303928,0.184  
1,71.608,rs502819,0.169  
1,71.614,rs560004,0.167  
1,71.655,rs10489600,0.143  
1,71.729,rs12098127,0.122  
1,71.732,rs11205499,0.116  
1,71.736,rs2354467,0.112  
1,71.738,rs1539525,0.116  
1,71.742,rs2803264,0.127  
1,71.746,rs2803269,0.124  
1,71.750,rs2803274,0.126  
1,71.751,rs7539694,0.131  
1,71.756,rs319978,0.148  
1,71.757,rs6701767,0.150  
1,71.778,rs319959,0.162  
1,71.797,rs11586980,0.099  
1,71.853,rs10888636,0.119  
1,71.967,rs10489427,0.139  
1,72.050,rs11205641,0.155  
1,72.107,rs10493151,0.155  
1,72.123,rs17105974,0.155  
1,72.141,rs12043872,0.154  
1,72.178,rs4926849,0.148  
1,72.231,rs1875635,0.130  
1,72.318,rs1278537,0.118  
1,72.386,rs1149795,0.135  
1,72.389,rs11581155,0.135  
1,72.498,rs12134299,0.116  
1,73.217,rs12138419,0.130  
1,73.227,rs835342,0.130  
1,73.248,rs6671552,0.133  
1,73.263,rs2050695,0.117  
1,73.287,rs625829,0.135  
1,73.300,rs681865,0.145

1,73.429,rs6664794,0.174  
1,73.559,rs512723,0.175  
1,73.842,rs3820201,0.127  
1,73.905,rs1320594,0.136  
1,73.940,rs6682324,0.139  
1,73.948,rs6695567,0.139  
1,74.051,rs1799821,0.150  
1,74.229,rs1288502,0.150  
1,74.242,rs1288495,0.152  
1,74.250,rs867884,0.153  
1,74.357,rs4926976,0.158  
1,74.416,rs1316436,0.174  
1,74.496,rs6656566,0.176  
1,74.506,rs2000239,0.175  
1,74.673,rs11206165,0.199  
1,74.711,rs2280511,0.161  
1,74.775,rs11206169,0.156  
1,74.796,rs563403,0.158  
1,74.829,rs4927007,0.161  
1,74.847,rs1983485,0.161  
1,75.030,rs2141079,0.160  
1,75.230,rs1725982,0.175  
1,75.253,rs1183394,0.180  
1,75.347,rs1181180,0.196  
1,75.485,rs6588492,0.213  
1,75.589,rs2235544,0.222  
1,75.912,rs3820112,0.258  
1,76.063,rs612368,0.254  
1,76.089,rs12078845,0.257  
1,76.159,rs686106,0.267  
1,76.303,rs686930,0.280  
1,76.397,rs11206315,0.297  
1,76.423,rs6697414,0.326  
1,76.425,rs4927081,0.334  
1,76.448,rs7523947,0.356  
1,76.457,rs6695534,0.361  
1,76.704,rs4927101,0.476  
1,76.758,rs1543369,0.507  
1,76.844,rs190963,0.552  
1,76.875,rs904218,0.561  
1,76.890,rs1888182,0.565  
1,76.989,rs7515747,0.578  
1,76.992,rs299872,0.578  
1,77.059,rs1755588,0.618  
1,77.062,rs300269,0.620  
1,77.148,rs11206396,0.621  
1,77.288,rs7551288,0.827  
1,77.304,rs601902,0.827  
1,77.378,rs626353,0.812  
1,77.404,rs2114574,0.804  
1,77.474,rs4927186,0.710  
1,77.484,rs2182832,0.704  
1,77.486,rs2149037,0.702  
1,77.493,rs2479394,0.693  
1,77.534,rs11206514,0.646  
1,77.662,rs1165226,0.651  
1,77.747,rs880385,0.759  
1,77.757,rs17112041,0.772  
1,77.797,rs987029,0.791  
1,77.826,rs356086,0.837  
1,77.836,rs1392127,0.855

1,77.846,rs1499672,0.873  
1,77.880,rs10443215,0.897  
1,77.885,rs9436516,0.905  
1,77.912,rs1183736,0.926  
1,77.927,rs12098020,0.939  
1,77.939,rs11577319,0.954  
1,77.965,rs10493190,0.988  
1,77.977,rs4540693,1.003  
1,78.373,rs1412215,1.038  
1,78.510,rs1229948,1.032  
1,79.041,rs2793673,0.978  
1,79.060,rs12070360,0.968  
1,79.192,rs10159099,0.899  
1,79.369,rs4431886,0.791  
1,79.471,rs884277,0.744  
1,79.482,rs12093027,0.741  
1,79.534,rs875153,0.784  
1,79.562,rs3892374,0.816  
1,79.689,rs4628,0.866  
1,79.723,rs12081589,0.883  
1,79.778,rs1041602,0.894  
1,79.829,rs933001,0.918  
1,79.960,rs11206887,0.940  
1,80.092,rs10489618,0.934  
1,80.144,rs857107,0.908  
1,80.187,rs1569746,0.935  
1,80.206,rs2298130,0.937  
1,80.226,rs6662617,0.943  
1,80.256,rs6672416,1.041  
1,80.264,rs947636,1.080  
1,80.286,rs761964,1.156  
1,80.295,rs706469,1.189  
1,80.311,rs647962,1.204  
1,80.571,rs626457,1.532  
1,80.607,rs582317,1.575  
1,80.887,rs595056,1.735  
1,80.907,rs155312,1.662  
1,80.929,rs495875,1.615  
1,80.951,rs17115362,1.600  
1,81.015,rs17115430,1.534  
1,81.019,rs17115445,1.531  
1,81.084,rs2764664,1.471  
1,81.159,rs17422457,1.427  
1,81.335,rs269045,1.380  
1,81.460,rs6686072,1.413  
1,81.510,rs1341318,1.434  
1,81.624,rs6687355,1.430  
1,81.911,rs3131780,1.307  
1,81.955,rs3118027,1.289  
1,81.958,rs7354949,1.286  
1,81.973,rs1886139,1.222  
1,82.191,rs852801,1.099  
1,82.336,rs1188002,0.981  
1,82.341,rs1998739,0.976  
1,82.355,rs6663542,0.962  
1,82.361,rs4110981,0.956  
1,82.372,rs2806403,0.944  
1,82.694,rs639241,0.593  
1,82.735,rs4912316,0.563  
1,82.803,rs12076949,0.513  
1,82.913,rs1318371,0.468

1,82.922,rs11207205,0.466  
1,82.942,rs4912192,0.463  
1,82.997,rs338934,0.431  
1,83.015,rs338919,0.428  
1,83.034,rs338911,0.468  
1,83.043,rs11207224,0.465  
1,83.070,rs849469,0.455  
1,83.142,rs232816,0.438  
1,83.513,rs2811876,0.427  
1,83.553,rs6677589,0.427  
1,83.635,rs11207306,0.434  
1,83.764,rs942124,0.464  
1,83.812,rs9436174,0.470  
1,83.823,rs4601609,0.471  
1,84.020,rs2764914,0.488  
1,84.025,rs6667591,0.488  
1,84.133,rs2764933,0.490  
1,84.424,rs3010325,0.459  
1,84.446,rs2985500,0.453  
1,84.480,rs474103,0.406  
1,84.502,rs162683,0.400  
1,84.525,rs17119061,0.392  
1,84.704,rs7540474,0.328  
1,84.828,rs6683082,0.272  
1,85.027,rs835435,0.243  
1,85.033,rs12563198,0.274  
1,85.033,rs1188236,0.275  
1,85.036,rs6692151,0.263  
1,85.037,rs2798652,0.278  
1,85.046,rs12732614,0.318  
1,85.048,rs1890212,0.292  
1,85.049,rs2897708,0.292  
1,85.049,rs1004772,0.300  
1,85.058,rs9436605,0.361  
1,85.162,rs11800976,0.403  
1,85.162,rs2807619,0.405  
1,85.178,rs681128,0.435  
1,85.273,rs6661520,0.431  
1,85.286,rs17120400,0.435  
1,85.319,rs6587879,0.446  
1,85.361,rs407173,0.456  
1,85.386,rs10493287,0.415  
1,85.454,rs6680587,0.386  
1,85.472,rs496946,0.378  
1,85.541,rs1381166,0.378  
1,85.561,rs1461353,0.381  
1,85.647,rs6661743,0.362  
1,85.729,rs2211560,0.387  
1,85.779,rs7516519,0.369  
1,85.787,rs11808039,0.368  
1,85.921,rs581503,0.337  
1,86.085,rs1002005,0.304  
1,86.104,rs2044548,0.304  
1,86.132,rs591979,0.301  
1,86.167,rs2121598,0.310  
1,86.172,rs662495,0.311  
1,86.201,rs12062121,0.316  
1,86.285,rs632853,0.317  
1,86.305,rs543314,0.313  
1,86.344,rs1572312,0.304  
1,86.369,rs2361817,0.298

1,86.379,rs12030799,0.298  
1,86.548,rs1283256,0.273  
1,86.624,rs1779865,0.261  
1,86.635,rs2173345,0.259  
1,87.002,rs10493302,0.224  
1,87.049,rs6693597,0.222  
1,87.154,rs2008968,0.214  
1,87.356,rs7540527,0.177  
1,87.484,rs437021,0.155  
1,87.521,rs2806426,0.195  
1,87.567,rs7521242,0.216  
1,87.598,rs12568891,0.222  
1,87.632,rs7535730,0.215  
1,87.655,rs2207792,0.216  
1,87.671,rs2474364,0.220  
1,87.678,rs17265852,0.221  
1,87.706,rs4915745,0.229  
1,87.761,rs7541526,0.223  
1,87.784,rs6661015,0.218  
1,87.815,rs12143476,0.203  
1,87.844,rs1933293,0.196  
1,87.879,rs11207801,0.190  
1,87.882,rs6587943,0.190  
1,87.886,rs2365465,0.189  
1,87.941,rs17312971,0.183  
1,87.963,rs3790580,0.177  
1,87.988,rs1892022,0.178  
1,87.992,rs7528744,0.174  
1,88.010,rs7516332,0.159  
1,88.060,rs2365498,0.134  
1,88.060,rs2788616,0.134  
1,88.087,rs4598521,0.130  
1,88.111,rs1412622,0.139  
1,88.141,rs10889271,0.091  
1,88.302,rs2476194,0.125  
1,88.335,rs12095754,0.120  
1,88.370,rs1056517,0.117  
1,88.372,rs4915802,0.117  
1,88.406,rs6692004,0.124  
1,88.450,rs882334,0.110  
1,88.451,rs7512821,0.110  
1,88.454,rs4915816,0.110  
1,88.465,rs2366210,0.091  
1,88.476,rs4915827,0.099  
1,88.492,rs3861941,0.112  
1,88.500,rs12042483,0.115  
1,88.553,rs10493324,0.111  
1,88.948,rs10889362,0.113  
1,89.341,rs7512480,0.112  
1,89.353,rs2803243,0.088  
1,89.393,rs7532163,0.069  
1,89.397,rs2780881,0.069  
1,89.408,rs2065585,0.069  
1,89.457,rs12119857,0.077  
1,89.460,rs4915627,0.070  
1,89.464,rs10889394,0.058  
1,89.476,rs2150030,0.043  
1,89.491,rs17124332,0.040  
1,89.493,rs1411390,0.040  
1,89.516,rs6694848,0.041  
1,89.543,rs1888176,0.049

1,89.562,rs6679559,0.052  
1,89.568,rs17318187,0.052  
1,89.587,rs10889403,0.054  
1,89.619,rs17390657,0.056  
1,89.666,rs3887428,0.049  
1,89.682,rs6588016,0.046  
1,89.697,rs7515650,0.047  
1,89.801,rs10493344,0.061  
1,89.814,rs2031402,0.062  
1,89.850,rs12024843,0.060  
1,89.865,rs2235950,0.059  
1,89.882,rs10489494,0.058  
1,89.890,rs932748,0.057  
1,89.910,rs7522426,0.056  
1,89.917,rs4915896,0.055  
1,90.236,rs927019,0.053  
1,90.240,rs2269260,0.053  
1,90.252,rs10489612,0.052  
1,90.261,rs2269248,0.052  
1,90.261,rs17301901,0.054  
1,90.265,rs2284997,0.068  
1,90.295,rs855332,0.069  
1,90.343,rs1354719,0.066  
1,90.350,rs937805,0.067  
1,90.480,rs1542805,0.055  
1,90.511,rs11208297,0.044  
1,90.602,rs2132161,0.021  
1,90.665,rs7513180,0.018  
1,90.903,rs3861946,0.013  
1,91.282,rs11208351,0.031  
1,91.288,rs2806541,0.031  
1,91.301,rs1408417,0.031  
1,91.336,rs4266926,0.032  
1,91.356,rs17126249,0.032  
1,91.408,rs10889476,0.023  
1,91.448,rs1155542,0.025  
1,91.470,rs305535,0.024  
1,91.483,rs12139788,0.024  
1,91.500,rs2484245,0.025  
1,91.595,rs305575,0.042  
1,91.615,rs11808959,0.037  
1,91.622,rs6686231,0.025  
1,91.641,rs751666,0.028  
1,91.647,rs12742304,0.029  
1,91.652,rs3934672,0.029  
1,91.659,rs1926303,0.029  
1,91.775,rs2201689,0.004  
1,91.830,rs6699614,0.001  
1,91.889,rs17127415,0.003  
1,91.893,rs1889926,0.001  
1,91.983,rs10493374,0.002  
1,92.066,rs11208645,0.006  
1,92.084,rs10493377,0.008  
1,92.272,rs2154380,0.013  
1,92.414,rs4291477,0.022  
1,92.453,rs12143459,0.025  
1,92.514,rs12061146,0.016  
1,92.538,rs10493388,0.013  
1,92.540,rs10493389,0.013  
1,92.607,rs4329483,0.016  
1,92.634,rs2997091,0.016

1,92.647,rs12568672,0.015  
1,92.673,rs17452121,0.014  
1,92.790,rs6588186,0.011  
1,92.835,rs539322,0.005  
1,92.868,rs17128467,0.004  
1,92.883,rs11208807,0.005  
1,92.926,rs12045279,0.004  
1,92.990,rs12021574,0.003  
1,93.011,rs519044,0.002  
1,93.122,rs783036,0.002  
1,93.247,rs17128891,0.001  
1,93.278,rs12116697,0.001  
1,93.313,rs783322,0.001  
1,93.350,rs1338187,0.001  
1,93.362,rs2121047,0.001  
1,93.419,rs4655616,0.002  
1,93.609,rs6689755,0.001  
1,93.646,rs6692318,0.001  
1,93.799,rs502376,0.003  
1,93.821,rs12727422,0.005  
1,93.862,rs474409,0.012  
1,93.865,rs12408354,0.013  
1,93.934,rs3738168,0.010  
1,93.937,rs17496172,0.010  
1,94.024,rs1925400,0.011  
1,94.422,rs17129664,0.014  
1,94.453,rs10489631,0.013  
1,94.662,rs10889675,0.017  
1,94.716,rs1495965,0.020  
1,94.757,rs3790558,0.014  
1,95.004,rs4081356,0.030  
1,95.038,rs787538,0.032  
1,95.075,rs805112,0.031  
1,95.158,rs4655568,0.021  
1,95.200,rs344934,0.018  
1,95.460,rs17474654,0.035  
1,95.611,rs7520899,0.041  
1,95.801,rs10789253,0.027  
1,95.829,rs4655768,0.035  
1,95.999,rs7526959,0.033  
1,95.999,rs1033973,0.033  
1,96.027,rs12741473,0.041  
1,96.028,rs2566762,0.042  
1,96.032,rs14130,0.042  
1,96.034,rs2271,0.042  
1,96.124,rs1367448,0.043  
1,96.125,rs1864569,0.043  
1,96.141,rs944082,0.044  
1,96.141,rs17130546,0.044  
1,96.173,rs1036067,0.045  
1,96.182,rs7554551,0.046  
1,96.363,rs4926355,0.053  
1,96.389,rs10889765,0.060  
1,96.603,rs1924533,0.040  
1,96.750,rs10889786,0.037  
1,96.776,rs1492075,0.053  
1,96.809,rs7541833,0.053  
1,96.861,rs854273,0.043  
1,96.941,rs12030971,0.035  
1,96.948,rs6588344,0.035  
1,97.019,rs17130868,0.030

1,97.038,rs11810068,0.030  
1,97.068,rs1763926,0.028  
1,97.083,rs12086324,0.028  
1,97.097,rs2248556,0.027  
1,97.185,rs2815466,0.020  
1,97.209,rs12404688,0.022  
1,97.263,rs10518315,0.027  
1,97.276,rs12135013,0.029  
1,97.281,rs1998846,0.040  
1,97.287,rs9326089,0.029  
1,97.315,rs1120087,0.029  
1,97.422,rs1749504,0.025  
1,97.457,rs7515290,0.025  
1,97.485,rs1417438,0.025  
1,97.493,rs1417436,0.026  
1,97.496,rs1740900,0.026  
1,97.507,rs10489555,0.027  
1,97.542,rs1340769,0.029  
1,97.585,rs12028771,0.029  
1,97.659,rs6663915,0.029  
1,97.720,rs12048343,0.029  
1,97.858,rs12048356,0.027  
1,97.961,rs7523188,0.024  
1,97.990,rs681475,0.023  
1,98.057,rs6424388,0.019  
1,98.077,rs9988559,0.012  
1,98.088,rs2807911,0.011  
1,98.100,rs1333680,0.011  
1,98.107,rs17131320,0.012  
1,98.131,rs10889879,0.016  
1,98.133,rs2651237,0.021  
1,98.136,rs617211,0.025  
1,98.167,rs4515743,0.031  
1,98.174,rs4233083,0.033  
1,98.179,rs4146541,0.033  
1,98.180,rs4233084,0.033  
1,98.208,rs7522196,0.033  
1,98.273,rs8179355,0.032  
1,98.308,rs10889884,0.031  
1,98.428,rs12563671,0.030  
1,98.454,rs998550,0.029  
1,98.624,rs4998697,0.047  
1,98.632,rs1409165,0.046  
1,98.644,rs875727,0.046  
1,99.031,rs2796188,0.030  
1,99.210,rs356392,0.028  
1,99.282,rs17091221,0.028  
1,99.292,rs7550923,0.028  
1,99.326,rs1334992,0.041  
1,99.340,rs1041676,0.047  
1,99.352,rs1591382,0.048  
1,99.387,rs6424449,0.047  
1,99.445,rs1486087,0.036  
1,99.451,rs2821267,0.046  
1,99.531,rs7531118,0.024  
1,99.563,rs1445591,0.020  
1,99.571,rs1775367,0.026  
1,99.585,rs4650141,0.034  
1,99.604,rs4650146,0.048  
1,99.629,rs2062664,0.057  
1,99.697,rs4617355,0.068



1,99.759,rs1874731,0.033  
1,99.766,rs1353671,0.031  
1,99.810,rs17094526,0.021  
1,99.870,rs10890101,0.013  
1,99.883,rs10493535,0.012  
1,99.997,rs12046751,0.012  
1,100.124,rs1341573,0.007  
1,100.171,rs17095501,0.003  
1,100.182,rs6604872,0.002  
1,100.183,rs3845348,0.002  
1,100.215,rs696698,0.000  
1,100.249,rs12239912,-0.000  
1,100.255,rs10789400,-0.000  
1,100.273,rs2032968,-0.000  
1,100.329,rs2134837,0.000  
1,100.384,rs4949857,0.000  
1,100.708,rs623850,0.000  
1,100.993,rs10874314,0.001  
1,101.027,rs1571983,0.001  
1,101.746,rs1251531,0.003  
1,101.753,rs11162065,0.003  
1,101.772,rs6593523,0.002  
1,101.787,rs1370714,0.002  
1,101.864,rs11803060,0.002  
1,101.918,rs427589,0.002  
1,101.982,rs7513539,0.002  
1,102.005,rs11162094,0.004  
1,102.123,rs544858,0.015  
1,102.196,rs3884182,0.016  
1,102.200,rs6681765,0.024  
1,102.211,rs2392030,0.025  
1,102.267,rs1325287,0.024  
1,102.334,rs6667721,0.022  
1,102.347,rs2147791,0.014  
1,102.357,rs11162150,0.014  
1,102.422,rs7413797,0.009  
1,102.479,rs6660107,0.010  
1,102.491,rs315093,0.010  
1,102.493,rs1436087,0.001  
1,102.494,rs4949632,0.007  
1,102.512,rs315084,0.006  
1,102.588,rs315025,0.006  
1,102.590,rs7513970,0.006  
1,102.675,rs484299,0.002  
1,102.780,rs489723,0.002  
1,102.810,rs647890,0.002  
1,102.819,rs651752,0.001  
1,102.911,rs11577464,0.001  
1,102.952,rs1004454,0.001  
1,102.955,rs1403243,0.001  
1,102.978,rs9728378,0.000  
1,103.023,rs10873925,-0.001  
1,103.033,rs199687,-0.001  
1,103.050,rs199707,-0.002  
1,103.068,rs191827,-0.004  
1,103.069,rs199710,-0.004  
1,103.146,rs12131286,-0.012  
1,103.162,rs2799549,-0.014  
1,103.173,rs2689680,-0.014  
1,103.214,rs2054020,-0.013  
1,103.223,rs7546131,-0.013

1,103.333,rs4245660,-0.012  
1,103.347,rs17101276,-0.012  
1,103.364,rs1022103,-0.011  
1,103.438,rs720887,-0.016  
1,103.456,rs2352037,-0.018  
1,103.537,rs674345,-0.026  
1,103.571,rs1412414,-0.029  
1,103.600,rs6701594,-0.029  
1,103.644,rs12080077,-0.029  
1,103.663,rs984107,-0.029  
1,103.683,rs273238,-0.026  
1,103.715,rs273249,-0.029  
1,103.722,rs1333971,-0.030  
1,103.765,rs1751520,-0.032  
1,103.795,rs1937020,-0.024  
1,104.081,rs2635121,-0.055  
1,104.171,rs6424618,-0.067  
1,104.321,rs1571993,-0.085  
1,104.325,rs12097617,-0.085  
1,104.330,rs17102812,-0.100  
1,104.343,rs5008836,-0.102  
1,104.555,rs2201453,-0.131  
1,104.605,rs11162772,-0.157  
1,104.688,rs10874073,-0.157  
1,104.717,rs17425287,-0.157  
1,104.972,rs3001446,-0.153  
1,105.027,rs17104602,-0.133  
1,105.089,rs12563780,-0.139  
1,105.104,rs3909721,-0.140  
1,105.107,rs4650458,-0.170  
1,105.126,rs12118390,-0.172  
1,105.164,rs10493668,-0.176  
1,105.318,rs17399290,-0.186  
1,105.365,rs1279688,-0.192  
1,105.418,rs17105153,-0.188  
1,105.497,rs11163073,-0.186  
1,105.590,rs841666,-0.197  
1,105.657,rs7418088,-0.206  
1,105.763,rs2147085,-0.202  
1,105.885,rs12075367,-0.203  
1,106.128,rs11803328,-0.182  
1,106.169,rs1863618,-0.179  
1,106.185,rs11163179,-0.176  
1,106.208,rs1030414,-0.177  
1,106.226,rs1896176,-0.177  
1,106.239,rs12041774,-0.176  
1,106.494,rs1146418,-0.151  
1,106.575,rs3887577,-0.152  
1,106.696,rs1195854,-0.153  
1,106.817,rs1327609,-0.148  
1,106.841,rs6683338,-0.155  
1,106.857,rs17452799,-0.191  
1,106.867,rs10493689,-0.199  
1,106.903,rs6695272,-0.226  
1,106.927,rs6681688,-0.212  
1,106.956,rs6701355,-0.189  
1,106.990,rs2296234,-0.157  
1,107.026,rs7527341,-0.175  
1,107.090,rs4417125,-0.207  
1,107.113,rs7523717,-0.199  
1,107.146,rs2389165,-0.111

1,107.160,rs561278,-0.095  
1,107.199,rs962249,-0.062  
1,107.400,rs1505550,-0.061  
1,107.415,rs17108037,-0.064  
1,107.442,rs785584,-0.081  
1,107.466,rs12408229,-0.098  
1,107.469,rs2047965,-0.100  
1,107.477,rs1144283,-0.085  
1,107.487,rs1281614,-0.087  
1,107.514,rs1281597,-0.095  
1,107.567,rs10874312,-0.119  
1,107.635,rs318419,-0.115  
1,107.926,rs438697,-0.108  
1,107.932,rs480745,-0.109  
1,107.991,rs1440445,-0.117  
1,108.001,rs1930272,-0.119  
1,108.030,rs6682943,-0.124  
1,108.070,rs12033542,-0.127  
1,108.100,rs1856150,-0.126  
1,108.167,rs4907149,-0.150  
1,108.170,rs4465227,-0.154  
1,108.180,rs4907154,-0.168  
1,108.198,rs12141980,-0.176  
1,108.200,rs10874404,-0.200  
1,108.206,rs12098061,-0.208  
1,108.237,rs6576943,-0.252  
1,108.343,rs12057561,-0.239  
1,108.514,rs599941,-0.300  
1,108.531,rs316689,-0.306  
1,108.549,rs1983077,-0.309  
1,108.552,rs680308,-0.309  
1,108.558,rs316635,-0.308  
1,108.571,rs813056,-0.313  
1,108.622,rs315552,-0.326  
1,108.704,rs11163949,-0.348  
1,108.768,rs6576706,-0.360  
1,108.805,rs1395415,-0.367  
1,108.852,rs11163981,-0.398  
1,108.909,rs186360,-0.400  
1,109.066,rs17367018,-0.409  
1,109.125,rs6687220,-0.411  
1,109.130,rs1340523,-0.411  
1,109.233,rs4471288,-0.391  
1,109.263,rs9659298,-0.360  
1,109.269,rs9701126,-0.363  
1,109.288,rs10782527,-0.374  
1,109.316,rs11161458,-0.377  
1,109.349,rs1359607,-0.380  
1,109.379,rs17116652,-0.371  
1,109.382,rs4907104,-0.370  
1,109.406,rs9730423,-0.366  
1,109.461,rs4907013,-0.345  
1,109.490,rs3738572,-0.353  
1,109.491,rs6681025,-0.402  
1,109.492,rs12057637,-0.417  
1,109.577,rs6691970,-0.405  
1,109.727,rs1542427,-0.389  
1,109.738,rs709767,-0.389  
1,109.813,rs817395,-0.375  
1,109.913,rs12065219,-0.359  
1,109.953,rs17382610,-0.356

1,110.047,rs551140,-0.347  
1,110.079,rs1403956,-0.344  
1,110.084,rs7538364,-0.341  
1,110.097,rs562080,-0.334  
1,110.104,rs3818958,-0.330  
1,110.113,rs10493768,-0.324  
1,110.147,rs1524004,-0.310  
1,110.173,rs12086058,-0.248  
1,110.195,rs7518036,-0.250  
1,110.310,rs1047893,-0.263  
1,110.355,rs313728,-0.262  
1,110.367,rs3753785,-0.263  
1,110.507,rs605060,-0.279  
1,110.543,rs4912453,-0.238  
1,110.566,rs10518362,-0.229  
1,110.594,rs597669,-0.214  
1,110.645,rs1360903,-0.195  
1,110.726,rs1507269,-0.193  
1,110.791,rs7546158,-0.195  
1,110.833,rs1323035,-0.205  
1,110.966,rs2753338,-0.144  
1,110.967,rs1358826,-0.144  
1,111.014,rs2791473,-0.134  
1,111.059,rs772598,-0.171  
1,111.288,rs12142266,-0.161  
1,111.478,rs11161927,-0.172  
1,111.545,rs1199673,-0.175  
1,111.570,rs12136695,-0.187  
1,111.597,rs17454536,-0.200  
1,111.600,rs7556318,-0.204  
1,111.612,rs12563224,-0.247  
1,111.631,rs6690180,-0.285  
1,111.634,rs10873824,-0.289  
1,111.636,rs6576876,-0.292  
1,111.655,rs10747342,-0.316  
1,111.665,rs1330864,-0.320  
1,111.699,rs4119928,-0.315  
1,111.736,rs10873830,-0.308  
1,111.740,rs3766024,-0.305  
1,111.757,rs7518015,-0.290  
1,111.758,rs17129984,-0.291  
1,111.888,rs7349161,-0.327  
1,111.909,rs10873855,-0.318  
1,111.961,rs9433603,-0.323  
1,111.985,rs923545,-0.308  
1,112.006,rs4409623,-0.302  
1,112.014,rs4534351,-0.302  
1,112.111,rs10493801,-0.310  
1,112.130,rs7531638,-0.303  
1,112.150,rs305445,-0.296  
1,112.156,rs1024314,-0.296  
1,112.169,rs305431,-0.295  
1,112.231,rs4655988,-0.340  
1,112.263,rs12750772,-0.329  
1,112.382,rs2503248,-0.287  
1,112.401,rs945058,-0.285  
1,112.482,rs2991716,-0.249  
1,112.549,rs11801253,-0.298  
1,112.606,rs12143926,-0.284  
1,112.685,rs4278350,-0.267  
1,112.706,rs17130256,-0.264

1,112.764,rs1932761,-0.255  
1,112.805,rs2390441,-0.285  
1,112.847,rs6699416,-0.283  
1,112.932,rs525002,-0.306  
1,113.051,rs17130444,-0.303  
1,113.089,rs12039248,-0.298  
1,113.523,rs13376108,-0.274  
1,113.560,rs7532151,-0.273  
1,113.570,rs4393127,-0.274  
1,113.720,rs12408856,-0.299  
1,113.817,rs1410871,-0.314  
1,113.874,rs2077845,-0.287  
1,113.883,rs12131735,-0.286  
1,113.978,rs6428523,-0.284  
1,114.138,rs359920,-0.279  
1,114.153,rs9428043,-0.309  
1,114.215,rs1885745,-0.294  
1,114.233,rs1215512,-0.291  
1,114.321,rs12032393,-0.280  
1,114.410,rs6659997,-0.276  
1,114.423,rs12565034,-0.279  
1,114.435,rs2186184,-0.269  
1,114.449,rs7542239,-0.258  
1,114.506,rs1344059,-0.275  
1,114.522,rs17505638,-0.275  
1,114.555,rs2816893,-0.271  
1,114.628,rs954145,-0.261  
1,114.650,rs12079836,-0.223  
1,114.668,rs2813746,-0.216  
1,114.716,rs6679194,-0.178  
1,114.727,rs7520257,-0.186  
1,114.765,rs4388690,-0.174  
1,114.780,rs4330906,-0.171  
1,114.782,rs4415546,-0.128  
1,114.937,rs10801803,-0.145  
1,115.039,rs578509,-0.160  
1,115.086,rs527402,-0.160  
1,115.189,rs6679215,-0.181  
1,115.210,rs2212940,-0.182  
1,115.215,rs2797293,-0.183  
1,115.263,rs10493842,-0.191  
1,115.309,rs10801825,-0.191  
1,115.346,rs698274,-0.168  
1,115.631,rs354623,-0.173  
1,115.648,rs469846,-0.190  
1,115.649,rs469772,-0.189  
1,115.731,rs347004,-0.179  
1,115.755,rs613176,-0.178  
1,115.759,rs384642,-0.178  
1,115.887,rs10801851,-0.152  
1,116.074,rs3851270,-0.132  
1,116.080,rs12058802,-0.131  
1,116.128,rs13447454,-0.171  
1,116.157,rs963911,-0.179  
1,116.162,rs10874792,-0.181  
1,116.170,rs4658241,-0.177  
1,116.173,rs1041159,-0.176  
1,116.181,rs10874851,-0.164  
1,116.185,rs2148322,-0.157  
1,116.199,rs1805113,-0.136  
1,116.200,rs6665312,-0.133

1,116.205,rs12076549,-0.117  
1,116.237,rs1805110,-0.124  
1,116.245,rs6680614,-0.126  
1,116.270,rs10747493,-0.130  
1,116.297,rs11166141,-0.133  
1,116.928,rs11164855,-0.096  
1,116.974,rs2249590,-0.096  
1,117.275,rs7339890,-0.126  
1,117.393,rs236316,-0.156  
1,117.463,rs236285,-0.162  
1,117.487,rs907784,-0.168  
1,117.498,rs12022530,-0.171  
1,117.506,rs4847183,-0.171  
1,117.634,rs2235970,-0.177  
1,117.640,rs10489605,-0.178  
1,117.719,rs1889547,-0.210  
1,117.731,rs3789375,-0.216  
1,117.760,rs1320502,-0.263  
1,117.761,rs1889548,-0.263  
1,117.777,rs497511,-0.244  
1,117.787,rs4612636,-0.237  
1,117.789,rs12759306,-0.236  
1,117.805,rs952499,-0.244  
1,117.808,rs4147825,-0.246  
1,117.824,rs10782976,-0.307  
1,117.847,rs871664,-0.354  
1,117.848,rs2774920,-0.355  
1,117.991,rs12027548,-0.432  
1,117.994,rs11584317,-0.434  
1,118.145,rs582798,-0.475  
1,118.165,rs696619,-0.481  
1,118.215,rs1772895,-0.541  
1,118.220,rs1245489,-0.596  
1,118.235,rs12725602,-0.633  
1,118.255,rs1245480,-0.624  
1,118.275,rs7513758,-0.627  
1,118.290,rs12120217,-0.627  
1,118.353,rs2391423,-0.572  
1,118.399,rs915012,-0.555  
1,118.417,rs696620,-0.498  
1,118.436,rs7531174,-0.485  
1,118.441,rs698953,-0.485  
1,118.454,rs859063,-0.491  
1,118.500,rs1146460,-0.475  
1,118.539,rs2391391,-0.456  
1,118.557,rs11165285,-0.449  
1,118.693,rs2148796,-0.455  
1,118.754,rs2039614,-0.461  
1,118.830,rs11165406,-0.461  
1,118.872,rs6692957,-0.460  
1,118.945,rs880686,-0.436  
1,118.967,rs12142219,-0.459  
1,118.969,rs7554994,-0.458  
1,118.980,rs6678734,-0.457  
1,119.015,rs4245671,-0.426  
1,119.037,rs2051029,-0.422  
1,119.125,rs6682297,-0.409  
1,119.164,rs1402807,-0.452  
1,119.206,rs321556,-0.421  
1,119.217,rs321588,-0.422  
1,119.328,rs6677110,-0.394

1,119.377,rs6673531,-0.377  
1,119.479,rs6701736,-0.344  
1,119.516,rs4950016,-0.325  
1,119.556,rs182358,-0.313  
1,119.559,rs290821,-0.311  
1,119.608,rs11165779,-0.295  
1,119.651,rs6681743,-0.265  
1,119.662,rs6593639,-0.268  
1,119.683,rs12758854,-0.275  
1,119.686,rs4950025,-0.270  
1,119.731,rs9782950,-0.243  
1,119.734,rs12044858,-0.243  
1,119.764,rs12725266,-0.261  
1,119.775,rs4950033,-0.261  
1,119.776,rs17116720,-0.261  
1,119.785,rs1415681,-0.258  
1,119.814,rs4520446,-0.237  
1,119.842,rs17100624,-0.239  
1,119.857,rs2811205,-0.237  
1,119.913,rs10875102,-0.213  
1,120.297,rs9662365,-0.212  
1,120.606,rs12724493,-0.220  
1,120.622,rs11165975,-0.241  
1,120.624,rs822607,-0.243  
1,120.638,rs12120750,-0.236  
1,120.651,rs1323727,-0.240  
1,120.659,rs1328310,-0.243  
1,120.676,rs728656,-0.238  
1,120.718,rs3853696,-0.240  
1,120.722,rs3867319,-0.242  
1,120.813,rs4351664,-0.284  
1,120.828,rs6702126,-0.319  
1,120.832,rs992708,-0.319  
1,120.907,rs2046178,-0.346  
1,121.140,rs12411241,-0.294  
1,121.306,rs12075686,-0.240  
1,121.646,rs12083740,-0.201  
1,121.722,rs2148154,-0.191  
1,121.729,rs1325957,-0.190  
1,121.814,rs1419059,-0.175  
1,121.815,rs6695717,-0.175  
1,121.843,rs17120526,-0.175  
1,121.857,rs2027358,-0.175  
1,121.892,rs1339866,-0.177  
1,121.907,rs952519,-0.171  
1,121.937,rs12729121,-0.155  
1,121.945,rs844330,-0.155  
1,121.956,rs17405754,-0.152  
1,121.976,rs10783115,-0.149  
1,121.979,rs12035402,-0.149  
1,122.107,rs2307130,-0.134  
1,122.411,rs4579779,-0.133  
1,122.454,rs864633,-0.124  
1,122.605,rs2809823,-0.126  
1,122.634,rs11581062,-0.074  
1,122.719,rs10875355,-0.096  
1,122.731,rs12407211,-0.086  
1,122.735,rs6676516,-0.089  
1,122.742,rs12407294,-0.091  
1,122.745,rs12409786,-0.091  
1,122.755,rs6693660,-0.087

1,122.763,rs6577233,-0.086  
1,122.875,rs7541500,-0.068  
1,122.890,rs6577244,-0.067  
1,122.911,rs12041998,-0.065  
1,123.114,rs450404,-0.044  
1,123.282,rs7541801,-0.069  
1,123.407,rs4908170,-0.071  
1,123.624,rs7529743,-0.080  
1,123.678,rs11164282,-0.088  
1,123.786,rs2218476,-0.105  
1,123.835,rs716222,-0.102  
1,123.893,rs4908185,-0.112  
1,123.898,rs1445225,-0.152  
1,123.925,rs10493973,-0.162  
1,123.929,rs2039943,-0.164  
1,124.001,rs2050572,-0.175  
1,124.025,rs11802288,-0.198  
1,124.031,rs1932850,-0.202  
1,124.033,rs10493966,-0.203  
1,124.041,rs7529987,-0.206  
1,124.053,rs6684718,-0.215  
1,124.060,rs2022858,-0.210  
1,124.063,rs6679483,-0.206  
1,124.076,rs6577309,-0.203  
1,124.080,rs2889234,-0.203  
1,124.091,rs12061042,-0.198  
1,124.092,rs1341910,-0.198  
1,124.108,rs3916220,-0.184  
1,124.128,rs1878510,-0.189  
1,124.129,rs11164556,-0.190  
1,124.162,rs1241202,-0.202  
1,124.207,rs6692914,-0.208  
1,124.208,rs11586335,-0.208  
1,124.229,rs12751561,-0.211  
1,124.230,rs1406135,-0.212  
1,124.560,rs2208963,-0.203  
1,124.908,rs11185392,-0.217  
1,124.951,rs1928321,-0.211  
1,124.993,rs12406661,-0.206  
1,125.158,rs10494011,-0.190  
1,125.247,rs2594664,-0.192  
1,125.258,rs7418397,-0.192  
1,125.270,rs7411648,-0.193  
1,125.361,rs6695172,-0.187  
1,125.463,rs12036108,-0.172  
1,125.470,rs958515,-0.171  
1,125.508,rs7543757,-0.146  
1,125.569,rs2317613,-0.141  
1,125.596,rs11184300,-0.139  
1,125.606,rs716419,-0.138  
1,125.711,rs7411085,-0.139  
1,126.133,rs12030832,-0.123  
1,126.185,rs6700732,-0.100  
1,126.202,rs12565217,-0.098  
1,126.313,rs2501603,-0.088  
1,126.323,rs1524108,-0.073  
1,126.338,rs11184596,-0.072  
1,126.592,rs17016501,-0.060  
1,126.602,rs1380289,-0.059  
1,126.662,rs11184726,-0.057  
1,126.687,rs480255,-0.056



1,126.709,rs10494035,-0.053  
1,126.714,rs11184747,-0.047  
1,126.730,rs12046537,-0.033  
1,126.732,rs4915122,-0.031  
1,126.827,rs12752606,-0.031  
1,126.885,rs12567271,-0.031  
1,126.929,rs10494046,-0.032  
1,126.951,rs17017331,-0.032  
1,126.955,rs12023595,-0.032  
1,127.113,rs1519887,-0.033  
1,127.196,rs12137571,-0.025  
1,127.220,rs4304614,-0.025  
1,127.252,rs6704278,-0.024  
1,127.257,rs4641328,-0.024  
1,127.359,rs2232016,-0.016  
1,127.433,rs6583007,-0.010  
1,127.459,rs4364907,-0.006  
1,127.465,rs10494061,-0.002  
1,127.576,rs3123376,-0.001  
1,127.581,rs10494067,-0.002  
1,127.594,rs10494068,-0.002  
1,127.615,rs7411507,-0.002  
1,127.631,rs12066815,-0.002  
1,127.637,rs7555385,-0.002  
1,127.666,rs6662274,-0.002  
1,127.676,rs6681988,-0.011  
1,127.677,rs746603,-0.012  
1,127.682,rs2587895,-0.020  
1,127.767,rs597332,-0.004  
1,127.803,rs11185125,-0.003  
1,127.815,rs525007,-0.002  
1,127.820,rs666003,-0.003  
1,127.853,rs8676,-0.002  
1,127.875,rs7537311,-0.002  
1,127.909,rs6583034,-0.001  
1,127.938,rs7543435,-0.001  
1,127.941,rs12064875,-0.000  
1,127.980,rs2494067,-0.005  
1,127.999,rs2494043,-0.005  
1,128.028,rs4531312,-0.005  
1,128.061,rs12116592,-0.006  
1,128.086,rs12126655,-0.005  
1,128.152,rs345292,-0.001  
1,128.193,rs345306,-0.000  
1,128.209,rs17020437,-0.000  
1,128.250,rs1350629,-0.001  
1,128.272,rs12039210,-0.001  
1,128.361,rs11185266,-0.001  
1,128.371,rs12742113,-0.000  
1,128.460,rs828999,-0.000  
1,128.598,rs11185318,-0.000  
1,128.603,rs17574954,-0.000  
1,128.881,rs12039852,0.001  
1,128.960,rs970860,0.001  
1,129.016,rs10776714,0.001  
1,129.143,rs914807,0.001  
1,129.155,rs11582005,0.001  
1,129.261,rs10494097,0.000  
1,129.284,rs1277213,-0.000  
1,129.299,rs7551421,-0.000  
1,129.354,rs2131905,-0.000

1,129.478,rs865151,-0.000  
1,129.489,rs12403481,-0.000  
1,129.514,rs11102735,-0.000  
1,129.747,rs587727,-0.002  
1,129.773,rs17641977,-0.004  
1,129.788,rs17014495,-0.005  
1,129.818,rs659543,-0.006  
1,129.865,rs3120625,-0.002  
1,129.916,rs4970833,-0.000  
1,129.939,rs17035949,-0.002  
1,129.942,rs14000,-0.002  
1,130.387,rs2301230,-0.000  
1,130.434,rs865774,-0.000  
1,130.443,rs7544426,-0.000  
1,130.619,rs2094469,-0.007  
1,130.620,rs3818562,-0.007  
1,130.630,rs943640,-0.012  
1,130.666,rs7524737,-0.009  
1,130.670,rs4970781,-0.005  
1,130.713,rs484959,-0.003  
1,130.722,rs12563382,-0.006  
1,130.750,rs12566133,-0.009  
1,130.796,rs1021880,-0.011  
1,130.806,rs433192,-0.012  
1,130.813,rs333958,-0.013  
1,130.833,rs1999713,-0.015  
1,130.835,rs333951,-0.009  
1,130.856,rs333970,-0.015  
1,130.893,rs7365459,-0.019  
1,130.978,rs4838931,-0.043  
1,131.085,rs2011688,-0.044  
1,131.199,rs615204,-0.039  
1,131.238,rs958798,-0.044  
1,131.403,rs1323723,-0.029  
1,131.525,rs497451,-0.032  
1,131.837,rs2271885,-0.058  
1,131.959,rs6674775,-0.065  
1,132.115,rs1418747,-0.100  
1,132.133,rs343614,-0.099  
1,132.198,rs7521468,-0.103  
1,132.216,rs1418426,-0.116  
1,132.234,rs1149185,-0.135  
1,132.263,rs1282129,-0.130  
1,132.301,rs2820063,-0.146  
1,132.312,rs2783442,-0.150  
1,132.315,rs654997,-0.150  
1,132.320,rs2274232,-0.148  
1,132.326,rs17699274,-0.148  
1,132.387,rs12047673,-0.153  
1,132.411,rs3806448,-0.155  
1,132.468,rs12127313,-0.156  
1,132.508,rs10776724,-0.143  
1,132.604,rs17027501,-0.138  
1,132.623,rs961558,-0.136  
1,132.739,rs2485319,-0.110  
1,132.920,rs1361135,-0.136  
1,133.051,rs12028677,-0.124  
1,133.058,rs2798565,-0.124  
1,133.072,rs2789535,-0.123  
1,133.166,rs10776733,-0.116  
1,133.244,rs7516113,-0.109

1,133.252,rs2800880,-0.108  
1,133.371,rs3903904,-0.103  
1,133.541,rs3738298,-0.095  
1,133.546,rs1246194,-0.095  
1,133.547,rs475620,-0.095  
1,133.561,rs17028610,-0.109  
1,133.569,rs641724,-0.120  
1,133.627,rs7513810,-0.147  
1,133.628,rs12139985,-0.147  
1,133.630,rs1891716,-0.144  
1,133.651,rs12080989,-0.111  
1,133.665,rs1036959,-0.109  
1,133.675,rs9429608,-0.133  
1,133.690,rs1936061,-0.134  
1,133.695,rs9429425,-0.124  
1,133.704,rs9429614,-0.106  
1,133.714,rs6703437,-0.114  
1,133.720,rs4839193,-0.117  
1,133.733,rs1373286,-0.104  
1,133.759,rs10745323,-0.076  
1,133.827,rs10776740,-0.055  
1,133.830,rs269131,-0.055  
1,133.906,rs155648,-0.044  
1,133.932,rs10745326,-0.029  
1,133.990,rs6537730,-0.025  
1,134.074,rs17029987,-0.013  
1,134.225,rs2153995,-0.009  
1,134.280,rs1343274,-0.009  
1,134.502,rs2488778,-0.011  
1,134.572,rs2492493,-0.013  
1,134.599,rs2492497,-0.014  
1,134.747,rs1777610,-0.016  
1,135.279,rs351359,-0.024  
1,135.380,rs3790609,-0.019  
1,135.408,rs3006988,-0.020  
1,135.457,rs10494164,-0.030  
1,135.644,rs4462141,-0.061  
1,135.663,rs2432,-0.062  
1,135.666,rs901146,-0.062  
1,135.708,rs611514,-0.064  
1,135.713,rs2629812,-0.066  
1,135.740,rs12027243,-0.065  
1,135.749,rs7546417,-0.065  
1,135.769,rs476567,-0.081  
1,135.774,rs537478,-0.081  
1,135.793,rs2774298,-0.065  
1,135.871,rs631230,-0.072  
1,135.880,rs209876,-0.073  
1,135.906,rs1158366,-0.077  
1,135.921,rs430928,-0.078  
1,135.951,rs11586444,-0.077  
1,136.049,rs416908,-0.069  
1,136.149,rs714569,-0.045  
1,136.213,rs668800,-0.038  
1,136.257,rs486755,-0.031  
1,136.746,rs926938,-0.008  
1,136.838,rs3126219,-0.007  
1,137.048,rs1321106,-0.002  
1,137.082,rs17479518,-0.005  
1,137.107,rs12138359,-0.007  
1,137.171,rs1146179,-0.016

1,137.180,rs2798464,-0.017  
1,137.202,rs12033518,-0.019  
1,137.221,rs2068797,-0.024  
1,137.242,rs12058927,-0.026  
1,137.265,rs4320778,-0.024  
1,137.271,rs10776801,-0.022  
1,137.281,rs11102933,-0.019  
1,137.368,rs2334915,-0.005  
1,137.389,rs6696763,-0.005  
1,137.543,rs4240548,-0.015  
1,137.571,rs3010382,-0.016  
1,137.579,rs10923142,-0.018  
1,137.595,rs4571967,-0.008  
1,137.629,rs4423004,-0.007  
1,137.761,rs10754377,-0.008  
1,137.819,rs2131440,-0.010  
1,138.011,rs17035127,-0.006  
1,138.232,rs10802162,-0.002  
1,138.280,rs10489749,0.001  
1,138.281,rs2208363,0.001  
1,138.424,rs10924021,0.006  
1,138.535,rs4839534,0.010  
1,138.614,rs7552721,0.008  
1,138.806,rs17575616,0.003  
1,138.834,rs4839541,0.005  
1,138.847,rs4839073,0.005  
1,138.956,rs1414272,0.017  
1,138.961,rs6703791,0.018  
1,139.037,rs599563,0.029  
1,139.080,rs624988,0.044  
1,139.089,rs614448,0.044  
1,139.118,rs798037,0.042  
1,139.393,rs10923158,0.032  
1,139.451,rs2182605,0.033  
1,139.478,rs17036591,0.055  
1,139.479,rs11583252,0.055  
1,139.538,rs4128518,0.044  
1,139.587,rs12096164,0.041  
1,139.591,rs17036665,0.039  
1,139.616,rs1289655,0.021  
1,139.635,rs7546885,0.015  
1,139.661,rs2066398,0.013  
1,139.670,rs6428686,0.012  
1,139.700,rs10923228,0.014  
1,139.721,rs6692758,0.014  
1,139.757,rs12035668,0.016  
1,139.760,rs2137400,0.016  
1,139.762,rs7536105,0.016  
1,139.782,rs873975,0.018  
1,140.119,rs7554803,0.005  
1,140.139,rs6428738,0.004  
1,140.191,rs1885012,0.004  
1,140.216,rs10489732,0.004  
1,140.260,rs1146337,0.003  
1,140.285,rs1146320,0.003  
1,140.407,rs7542082,0.001  
1,140.445,rs1213852,0.001  
1,140.692,rs12742627,0.002  
1,140.700,rs2645303,0.002  
1,140.732,rs4387216,0.002  
1,140.758,rs17023344,0.002

1,140.761,rs12730226,0.002  
1,140.762,rs1341797,0.002  
1,140.767,rs12757996,0.001  
1,140.771,rs1539188,0.001  
1,140.773,rs17023386,0.001  
1,140.781,rs6695549,0.001  
1,140.788,rs838534,0.001  
1,140.794,rs7514283,0.001  
1,140.839,rs7546652,0.000  
1,140.894,rs7547046,0.000  
1,141.023,rs12139088,-0.000  
1,141.025,rs10754417,-0.000  
1,141.026,rs496886,-0.000  
1,141.028,rs12030925,-0.000  
1,141.029,rs942835,0.000  
1,141.030,rs517237,0.001  
1,141.032,rs1052972,0.001  
1,141.033,rs4659238,0.002  
1,141.038,rs17258579,0.001  
1,141.069,rs6683357,0.000  
1,142.090,rs10797649,0.000  
1,142.457,rs647596,-0.004  
1,142.597,rs1348316,-0.008  
1,142.661,rs2354432,-0.010  
1,142.965,rs4950437,-0.011  
1,143.077,rs10900376,-0.007  
1,143.228,rs3766509,-0.004  
1,143.239,rs2185437,-0.004  
1,143.251,rs10494246,-0.003  
1,143.336,rs2352867,0.001  
1,143.387,rs4268399,0.003  
1,143.501,rs10900403,0.008  
1,143.547,rs7541950,0.009  
1,144.079,rs2992453,0.010  
1,144.099,rs12561867,0.010  
1,144.130,rs515565,0.011  
1,145.521,rs11205277,0.054  
1,145.604,rs12063329,0.076  
1,145.812,rs509345,0.089  
1,145.885,rs11582094,0.091  
1,146.013,rs4971044,0.096  
1,146.065,rs11204684,0.096  
1,146.361,rs3820539,0.116  
1,146.442,rs4971004,0.119  
1,146.582,rs1056847,0.128  
1,146.627,rs1752380,0.109  
1,146.711,rs11204828,0.093  
1,146.752,rs3811411,0.091  
1,146.755,rs12121608,0.091  
1,146.824,rs1196348,0.081  
1,146.888,rs868360,0.071  
1,146.921,rs8480,0.065  
1,146.958,rs12045886,0.062  
1,146.964,rs7540530,0.076  
1,146.984,rs9645406,0.075  
1,147.055,rs1038745,0.078  
1,147.100,rs1131471,0.080  
1,147.133,rs1552991,0.059  
1,147.265,rs6587673,0.043  
1,147.316,rs6662637,0.040  
1,147.333,rs4845792,0.050

1,147.336,rs7516108,0.039  
1,147.531,rs1332506,0.041  
1,147.701,rs1854779,0.048  
1,147.742,rs11576457,0.049  
1,147.781,rs7541720,0.048  
1,147.938,rs381115,0.047  
1,148.014,rs1831238,0.046  
1,148.016,rs4845528,0.046  
1,148.035,rs7519359,0.036  
1,148.067,rs1926234,0.039  
1,148.150,rs2916229,0.041  
1,148.188,rs3014866,0.038  
1,148.195,rs1560832,0.029  
1,148.198,rs3014875,0.025  
1,148.224,rs3006488,0.025  
1,148.267,rs3014824,0.024  
1,148.299,rs12132927,0.023  
1,148.301,rs11205297,0.023  
1,148.384,rs3795393,0.022  
1,148.595,rs4845568,0.012  
1,148.600,rs11264336,0.014  
1,148.613,rs6427268,0.019  
1,148.673,rs1127091,0.010  
1,149.041,rs4459102,0.000  
1,149.328,rs1194596,-0.001  
1,149.476,rs6688376,-0.001  
1,149.527,rs10908835,-0.000  
1,149.632,rs4537545,0.000  
1,149.651,rs11265618,0.000  
1,149.736,rs11577167,0.000  
1,149.909,rs6699825,-0.000  
1,150.093,rs4845663,-0.001  
1,150.095,rs11264250,-0.001  
1,150.104,rs3738028,-0.001  
1,150.108,rs10494301,-0.001  
1,150.114,rs925042,-0.002  
1,150.125,rs10908429,-0.001  
1,150.127,rs6697935,-0.003  
1,150.140,rs906281,-0.003  
1,150.156,rs10908435,-0.003  
1,150.192,rs7532286,-0.001  
1,150.199,rs4845671,-0.000  
1,150.218,rs11577297,0.000  
1,150.225,rs954785,0.002  
1,150.244,rs7512194,0.001  
1,150.252,rs2335406,0.001  
1,150.253,rs1106235,0.000  
1,150.256,rs10796933,0.001  
1,150.292,rs1218578,-0.007  
1,150.323,rs4845396,-0.012  
1,150.446,rs1891805,-0.011  
1,150.523,rs6673081,-0.016  
1,150.541,rs4845406,-0.016  
1,150.565,rs3806256,-0.016  
1,150.656,rs4460629,-0.016  
1,151.343,rs625658,-0.001  
1,151.529,rs2485662,-0.000  
1,151.592,rs1984508,-0.000  
1,151.685,rs1052053,-0.000  
1,151.749,rs933489,0.000  
1,151.950,rs2985714,0.001

1,151.952,rs7525133,0.001  
1,151.996,rs7551218,0.002  
1,152.053,rs7548323,0.001  
1,152.077,rs4414033,0.000  
1,152.436,rs12567958,-0.011  
1,152.513,rs4661210,-0.014  
1,152.567,rs12759184,-0.028  
1,152.568,rs4402117,-0.028  
1,152.576,rs11264527,-0.028  
1,152.582,rs11264528,-0.027  
1,152.618,rs11811735,-0.014  
1,152.780,rs2644608,-0.002  
1,152.847,rs4661229,-0.001  
1,152.877,rs4661063,-0.001  
1,152.918,rs6334,-0.003  
1,153.019,rs945508,-0.003  
1,153.037,rs12138039,-0.004  
1,153.309,rs7519739,-0.020  
1,153.316,rs946577,-0.020  
1,153.424,rs6675916,-0.022  
1,153.540,rs10494310,-0.021  
1,153.973,rs2147445,-0.004  
1,154.128,rs3845580,-0.001  
1,154.155,rs12565640,-0.001  
1,154.187,rs4246538,-0.000  
1,154.282,rs11264737,0.000  
1,154.287,rs1412329,0.000  
1,154.298,rs7340113,0.001  
1,154.303,rs3900770,0.001  
1,154.314,rs1972240,0.001  
1,154.389,rs7522061,0.002  
1,154.481,rs4614251,0.004  
1,154.527,rs1217058,0.004  
1,154.613,rs6698985,0.008  
1,154.623,rs1888821,0.008  
1,154.645,rs1925034,0.010  
1,154.673,rs7537784,0.011  
1,154.830,rs7527735,0.018  
1,154.878,rs4971191,0.012  
1,154.889,rs1886389,0.012  
1,154.963,rs6695790,0.011  
1,155.055,rs12088518,0.015  
1,155.418,rs692565,0.026  
1,155.882,rs12033535,0.033  
1,156.070,rs1065457,0.034  
1,156.091,rs12139388,0.034  
1,156.125,rs17673153,0.033  
1,156.128,rs10489828,0.033  
1,156.206,rs1418846,0.031  
1,156.256,rs863367,0.028  
1,156.368,rs2435282,0.021  
1,156.394,rs2325696,0.021  
1,156.399,rs857838,0.021  
1,156.417,rs857863,0.020  
1,156.424,rs857788,0.020  
1,156.459,rs2188114,0.017  
1,156.631,rs2106096,0.009  
1,156.668,rs11805756,0.009  
1,156.727,rs2820187,0.009  
1,157.046,rs1361567,0.016  
1,157.299,rs12094741,0.012

1,157.522,rs2814774,0.001  
1,157.528,rs965359,0.001  
1,157.568,rs12075,0.001  
1,157.617,rs3845624,0.001  
1,157.735,rs4443888,0.001  
1,158.051,rs984553,0.001  
1,158.085,rs12076827,0.001  
1,158.112,rs2592887,0.001  
1,158.115,rs726640,0.003  
1,158.181,rs11265265,0.001  
1,158.198,rs11265269,0.001  
1,158.221,rs3806185,0.000  
1,158.226,rs4403628,0.000  
1,158.233,rs6662918,0.000  
1,158.236,rs11584887,0.000  
1,158.240,rs4630124,0.001  
1,158.278,rs2494523,0.000  
1,158.300,rs2501346,-0.000  
1,158.301,rs5010834,-0.000  
1,158.302,rs4133290,-0.001  
1,158.330,rs7521729,-0.002  
1,158.368,rs2494481,-0.000  
1,158.381,rs2252815,0.001  
1,158.403,rs4262538,0.002  
1,158.409,rs1316275,0.003  
1,158.425,rs2789426,0.004  
1,158.431,rs7521490,0.004  
1,158.441,rs4378200,0.005  
1,158.478,rs11809878,0.008  
1,158.482,rs2211107,0.008  
1,158.593,rs10908753,0.018  
1,158.602,rs4656879,0.018  
1,158.637,rs12753283,0.015  
1,158.654,rs4656888,0.011  
1,158.664,rs4656889,0.020  
1,158.672,rs11265343,0.014  
1,158.680,rs1935306,0.014  
1,158.751,rs6683177,0.018  
1,158.821,rs2066320,0.022  
1,158.870,rs16831846,0.023  
1,158.887,rs4656902,0.023  
1,158.931,rs7513382,0.024  
1,158.935,rs12090877,0.024  
1,158.966,rs10494343,0.023  
1,158.995,rs4656264,0.024  
1,159.216,rs6692382,0.018  
1,159.333,rs164288,0.021  
1,159.350,rs3766364,0.022  
1,159.390,rs11265461,0.039  
1,159.438,rs10489636,0.022  
1,159.440,rs10489637,0.022  
1,159.499,rs10489639,0.025  
1,159.515,rs352692,0.024  
1,159.521,rs184772,0.024  
1,159.755,rs485618,0.013  
1,159.768,rs10158850,0.012  
1,159.776,rs512525,0.012  
1,159.951,rs4656971,0.010  
1,159.961,rs16832570,0.009  
1,160.086,rs11576837,0.002  
1,160.153,rs4559524,0.001



1,160.412,rs2501873,-0.000  
1,160.527,rs6427588,-0.000  
1,160.702,rs12745664,-0.000  
1,160.751,rs10157070,-0.000  
1,160.863,rs4657039,-0.001  
1,161.201,rs1832739,-0.000  
1,161.236,rs17413333,0.000  
1,161.241,rs12135523,0.000  
1,161.270,rs12079477,0.000  
1,161.301,rs1027702,-0.000  
1,162.205,rs6673329,-0.003  
1,162.222,rs2684874,-0.003  
1,162.349,rs1912453,-0.003  
1,162.569,rs12031354,-0.006  
1,162.635,rs12045181,-0.006  
1,162.637,rs10799880,-0.006  
1,162.715,rs2343503,-0.006  
1,162.737,rs12093487,-0.006  
1,162.753,rs6427699,-0.006  
1,162.827,rs6664865,-0.006  
1,163.085,rs2841966,-0.006  
1,163.489,rs951437,-0.008  
1,163.655,rs2661303,-0.011  
1,163.704,rs10799899,-0.012  
1,164.042,rs2815284,-0.023  
1,164.167,rs10799902,-0.044  
1,164.322,rs1509019,-0.058  
1,164.710,rs16852030,-0.074  
1,164.865,rs2136241,-0.080  
1,165.086,rs1396544,-0.059  
1,165.161,rs4475722,-0.045  
1,165.238,rs3010348,-0.032  
1,165.380,rs12047638,-0.035  
1,165.556,rs3001080,-0.037  
1,165.574,rs2211183,-0.036  
1,165.592,rs4657294,-0.047  
1,165.605,rs10799928,-0.031  
1,165.615,rs1934497,-0.020  
1,165.616,rs2820871,-0.011  
1,165.638,rs2486834,-0.005  
1,165.696,rs6671591,-0.004  
1,165.732,rs10494395,-0.005  
1,166.008,rs781936,-0.001  
1,166.012,rs11582225,-0.000  
1,166.098,rs1444445,0.000  
1,166.102,rs1122279,0.000  
1,166.166,rs10917897,-0.000  
1,166.222,rs10917931,-0.001  
1,166.238,rs10737498,-0.001  
1,166.371,rs559021,-0.001  
1,166.454,rs1416436,-0.001  
1,166.512,rs2788526,-0.000  
1,166.535,rs11806933,0.000  
1,166.578,rs3945008,0.000  
1,166.606,rs17385225,0.000  
1,166.612,rs6662422,-0.000  
1,166.615,rs1954114,-0.000  
1,166.629,rs12402920,-0.000  
1,166.634,rs946253,-0.000  
1,166.643,rs1340519,-0.000  
1,166.652,rs10918034,-0.000

1,166.678,rs2275560,0.000  
1,166.712,rs1780365,-0.000  
1,166.744,rs2800787,-0.001  
1,166.762,rs10494418,-0.001  
1,166.781,rs1618566,-0.000  
1,166.805,rs2792248,0.000  
1,166.835,rs1892174,0.000  
1,166.846,rs1780361,0.000  
1,166.847,rs1552560,0.000  
1,166.851,rs1686195,0.000  
1,166.860,rs2171692,-0.000  
1,166.908,rs1780330,0.001  
1,166.931,rs10918063,0.002  
1,166.950,rs2789444,0.004  
1,166.954,rs7521521,0.004  
1,166.958,rs12098218,0.004  
1,166.969,rs6686727,0.004  
1,167.075,rs1890535,0.003  
1,167.084,rs10494426,0.003  
1,167.128,rs7512483,0.005  
1,167.198,rs12049436,0.015  
1,167.202,rs12119600,0.015  
1,167.206,rs6663388,0.017  
1,167.207,rs2881832,0.017  
1,167.214,rs4656427,0.020  
1,167.232,rs10918123,0.023  
1,167.246,rs4657406,0.022  
1,167.251,rs2348247,0.024  
1,167.275,rs6671290,0.020  
1,167.277,rs6703000,0.020  
1,167.281,rs10737508,0.020  
1,167.286,rs10494436,0.013  
1,167.362,rs1807798,0.004  
1,167.437,rs1504698,0.004  
1,167.442,rs875822,0.004  
1,167.452,rs10800084,0.004  
1,167.546,rs3845535,0.007  
1,167.620,rs16844019,0.011  
1,167.630,rs283690,0.012  
1,167.643,rs283695,0.012  
1,167.655,rs12069160,0.012  
1,167.760,rs17430865,0.013  
1,167.803,rs10918196,0.014  
1,167.855,rs12084656,0.015  
1,168.084,rs2252583,0.014  
1,168.340,rs4147592,0.010  
1,168.360,rs10800120,0.009  
1,168.542,rs1337442,0.004  
1,168.639,rs2090281,0.004  
1,168.834,rs7411708,0.006  
1,169.074,rs2153264,0.004  
1,169.169,rs6677965,0.007  
1,169.221,rs6426942,0.010  
1,169.361,rs3762365,0.034  
1,169.425,rs12063037,0.043  
1,169.440,rs2349106,0.044  
1,169.445,rs12026896,0.044  
1,169.515,rs732285,0.050  
1,169.547,rs12040476,0.055  
1,169.610,rs3856211,0.068  
1,169.680,rs4074897,0.081

1,169.686,rs4542197,0.066  
1,169.694,rs4657543,0.063  
1,169.776,rs7549089,0.042  
1,169.813,rs7544608,0.043  
1,169.842,rs10753736,0.021  
1,169.854,rs12096958,0.020  
1,169.921,rs7516525,0.015  
1,170.193,rs563244,0.008  
1,170.234,rs480820,0.009  
1,170.269,rs2064067,0.010  
1,170.530,rs10918607,0.016  
1,170.615,rs6698931,0.016  
1,170.632,rs4657625,0.016  
1,170.668,rs10918621,0.015  
1,170.729,rs267741,0.016  
1,170.737,rs2281959,0.016  
1,170.744,rs11806848,0.017  
1,170.800,rs6663682,0.016  
1,170.802,rs6691080,0.010  
1,170.825,rs9803659,0.011  
1,171.195,rs2258497,0.022  
1,171.206,rs1554669,0.023  
1,171.229,rs10918693,0.025  
1,171.231,rs1723015,0.025  
1,171.255,rs1214609,0.033  
1,171.263,rs858553,0.034  
1,171.276,rs6670426,0.055  
1,171.283,rs704853,0.073  
1,171.296,rs2982484,0.109  
1,171.327,rs1737498,0.155  
1,171.331,rs858492,0.161  
1,171.332,rs858490,0.162  
1,171.368,rs1737481,0.177  
1,171.416,rs767707,0.165  
1,171.488,rs1229387,0.201  
1,171.490,rs4657692,0.202  
1,171.505,rs12067995,0.196  
1,171.519,rs1229377,0.189  
1,171.533,rs1229355,0.199  
1,171.580,rs2862866,0.246  
1,171.676,rs4472738,0.238  
1,171.733,rs3213588,0.232  
1,171.758,rs12407873,0.231  
1,171.789,rs203795,0.216  
1,171.801,rs2071922,0.211  
1,171.835,rs203849,0.196  
1,172.204,rs4540637,0.207  
1,172.324,rs12049577,0.187  
1,172.419,rs3767481,0.187  
1,172.467,rs1008680,0.180  
1,172.502,rs7512951,0.206  
1,172.542,rs760685,0.205  
1,172.579,rs2255438,0.207  
1,172.589,rs2268545,0.243  
1,172.621,rs2300564,0.374  
1,172.645,rs742264,0.430  
1,172.651,rs2268539,0.437  
1,172.661,rs7535780,0.448  
1,172.764,rs1323530,0.479  
1,172.768,rs16860761,0.477  
1,172.908,rs7355223,0.472

1,172.942,rs10489218,0.483  
1,172.999,rs538060,0.447  
1,173.002,rs682367,0.447  
1,173.039,rs2207216,0.452  
1,173.041,rs736846,0.452  
1,173.072,rs3950134,0.456  
1,173.103,rs2206300,0.463  
1,173.253,rs169266,0.462  
1,173.331,rs1570334,0.457  
1,173.378,rs6657987,0.452  
1,173.485,rs3795611,0.439  
1,173.543,rs2984610,0.440  
1,173.581,rs10800398,0.444  
1,173.724,rs7544086,0.443  
1,173.876,rs1200100,0.456  
1,173.922,rs1200120,0.465  
1,173.933,rs2051145,0.465  
1,174.023,rs1200160,0.457  
1,174.356,rs1983546,0.456  
1,174.364,rs2038024,0.456  
1,174.368,rs2285211,0.457  
1,174.382,rs12120904,0.473  
1,174.399,rs6030,0.493  
1,174.418,rs6035,0.520  
1,174.428,rs6678795,0.533  
1,174.483,rs732314,0.493  
1,174.495,rs10919202,0.501  
1,174.645,rs9803860,0.500  
1,174.689,rs6692451,0.523  
1,174.822,rs1330369,0.581  
1,174.831,rs12135070,0.586  
1,174.838,rs532141,0.573  
1,174.845,rs4437927,0.550  
1,174.847,rs983118,0.545  
1,174.849,rs1547282,0.541  
1,174.879,rs16863369,0.502  
1,174.888,rs913257,0.502  
1,174.904,rs593479,0.609  
1,174.907,rs513287,0.569  
1,174.922,rs2143109,0.546  
1,174.948,rs3853181,0.442  
1,174.957,rs6608458,0.411  
1,174.958,rs7474070,0.412  
1,174.964,rs4916390,0.416  
1,174.979,rs7529080,0.432  
1,175.067,rs7547112,0.478  
1,175.079,rs12738952,0.485  
1,175.121,rs7519763,0.517  
1,175.142,rs12031933,0.533  
1,175.156,rs2207190,0.541  
1,175.231,rs10913149,0.610  
1,175.345,rs2421847,0.637  
1,175.392,rs235854,0.648  
1,175.404,rs7547017,0.651  
1,175.417,rs16864720,0.654  
1,175.500,rs6685742,0.686  
1,175.607,rs17650204,0.700  
1,175.620,rs909959,0.701  
1,175.761,rs4916239,0.673  
1,175.836,rs12028426,0.682  
1,175.873,rs2208370,0.688

1,175.986,rs16843795,0.683  
1,176.090,rs10911112,0.677  
1,176.111,rs11800549,0.681  
1,176.115,rs672740,0.681  
1,176.198,rs481154,0.586  
1,176.229,rs10489290,0.579  
1,176.250,rs2254810,0.489  
1,176.251,rs1492907,0.426  
1,176.253,rs6673027,0.452  
1,176.255,rs704842,0.448  
1,176.261,rs2071929,0.441  
1,176.303,rs11810332,0.396  
1,176.318,rs2227203,0.377  
1,176.327,rs972100,0.387  
1,176.346,rs2207061,0.357  
1,176.353,rs11484630,0.375  
1,176.354,rs10912540,0.377  
1,176.383,rs4916319,0.252  
1,176.437,rs10494489,0.230  
1,176.470,rs7526970,0.222  
1,176.478,rs2096148,0.220  
1,176.637,rs16845817,0.217  
1,176.655,rs1578624,0.218  
1,176.677,rs7526628,0.252  
1,176.837,rs10798282,0.293  
1,176.948,rs301696,0.315  
1,177.197,rs10489893,0.346  
1,177.996,rs2038025,0.491  
1,178.506,rs6690188,0.395  
1,178.549,rs6692370,0.399  
1,178.703,rs4652099,0.420  
1,178.737,rs12401659,0.397  
1,178.738,rs17312104,0.397  
1,178.771,rs10913063,0.402  
1,178.789,rs10913064,0.407  
1,178.891,rs6425361,0.387  
1,178.996,rs11810084,0.363  
1,179.058,rs10753110,0.353  
1,179.327,rs352314,0.266  
1,179.421,rs4233167,0.284  
1,179.432,rs6425386,0.300  
1,179.441,rs7535501,0.309  
1,179.466,rs2206510,0.300  
1,179.483,rs240099,0.298  
1,179.618,rs12094387,0.279  
1,179.650,rs2038047,0.289  
1,179.659,rs7521505,0.293  
1,179.718,rs2861885,0.315  
1,179.744,rs7519595,0.324  
1,179.755,rs10798499,0.357  
1,179.771,rs11577465,0.324  
1,179.810,rs982875,0.320  
1,179.845,rs12569209,0.324  
1,179.897,rs9662701,0.338  
1,179.918,rs11578222,0.351  
1,179.936,rs2902113,0.362  
1,180.002,rs1252071,0.378  
1,180.028,rs12035381,0.384  
1,180.054,rs3131308,0.392  
1,180.072,rs1885644,0.361  
1,180.088,rs4072161,0.355

1,180.118,rs3131322,0.327  
1,180.135,rs10798580,0.312  
1,180.157,rs943762,0.313  
1,180.164,rs3828137,0.314  
1,180.169,rs10913472,0.313  
1,180.177,rs869286,0.324  
1,180.192,rs12409266,0.345  
1,180.211,rs2185391,0.375  
1,180.307,rs178397,0.343  
1,180.432,rs11590951,0.320  
1,180.593,rs12022201,0.252  
1,180.622,rs2296376,0.281  
1,180.660,rs1490311,0.283  
1,181.094,rs4651024,0.301  
1,181.472,rs16854304,0.289  
1,181.473,rs10913816,0.289  
1,181.782,rs2504057,0.288  
1,181.808,rs10798715,0.288  
1,181.858,rs2504053,0.290  
1,181.893,rs4448483,0.289  
1,181.898,rs10913887,0.289  
1,182.255,rs17371084,0.288  
1,182.545,rs4336810,0.269  
1,182.644,rs3767170,0.272  
1,182.748,rs3911335,0.238  
1,182.770,rs357062,0.252  
1,182.771,rs6661125,0.253  
1,182.802,rs7536561,0.270  
1,183.292,rs16856123,0.205  
1,183.327,rs3845398,0.200  
1,183.335,rs12562357,0.199  
1,183.479,rs10494531,0.177  
1,183.493,rs12078544,0.175  
1,183.770,rs6700926,0.160  
1,183.900,rs2271668,0.147  
1,183.943,rs7515553,0.145  
1,183.958,rs3795505,0.146  
1,183.973,rs2297185,0.153  
1,183.985,rs3737062,0.156  
1,184.050,rs2331902,0.182  
1,184.081,rs3747956,0.188  
1,184.089,rs4652554,0.185  
1,184.096,rs17302632,0.180  
1,184.179,rs6425668,0.117  
1,184.188,rs4652572,0.114  
1,184.208,rs7523662,0.106  
1,184.364,rs7525299,0.093  
1,184.368,rs12094454,0.095  
1,184.399,rs12408625,0.111  
1,184.405,rs2609473,0.113  
1,184.457,rs591650,0.114  
1,184.470,rs601354,0.113  
1,184.512,rs629760,0.119  
1,184.540,rs943795,0.129  
1,184.555,rs558994,0.129  
1,184.583,rs4146634,0.127  
1,184.631,rs10494540,0.125  
1,184.708,rs4083386,0.128  
1,184.818,rs704329,0.132  
1,184.847,rs473200,0.136  
1,184.911,rs695072,0.155

1,185.003,rs12135968,0.152  
1,185.014,rs2262513,0.151  
1,185.068,rs1281317,0.149  
1,185.166,rs2236536,0.134  
1,185.214,rs3845452,0.127  
1,185.287,rs10911031,0.143  
1,185.343,rs2251093,0.152  
1,185.367,rs2256917,0.154  
1,185.403,rs2494467,0.159  
1,185.411,rs6703548,0.159  
1,185.433,rs10797768,0.162  
1,185.493,rs6674281,0.155  
1,185.532,rs497915,0.148  
1,185.552,rs155552,0.144  
1,185.660,rs266549,0.124  
1,185.669,rs10911098,0.123  
1,185.682,rs533259,0.112  
1,185.693,rs682585,0.102  
1,185.714,rs516567,0.119  
1,185.728,rs528846,0.104  
1,185.737,rs661506,0.107  
1,185.784,rs524269,0.113  
1,185.819,rs508607,0.119  
1,185.887,rs7540658,0.127  
1,185.929,rs2275171,0.122  
1,185.932,rs12080837,0.122  
1,186.028,rs6681606,0.135  
1,186.290,rs6424883,0.157  
1,186.312,rs6662844,0.115  
1,186.345,rs3845466,0.111  
1,186.350,rs2274065,0.110  
1,186.371,rs2231241,0.110  
1,186.465,rs4609388,0.104  
1,186.481,rs10797912,0.096  
1,186.484,rs2500123,0.095  
1,186.511,rs4262497,0.085  
1,186.540,rs4651156,0.075  
1,186.547,rs10911457,0.073  
1,186.553,rs4651157,0.073  
1,186.631,rs2378788,0.075  
1,186.634,rs16861794,0.077  
1,186.653,rs10911474,0.084  
1,186.659,rs7521638,0.082  
1,186.704,rs1952251,0.069  
1,186.719,rs10158437,0.056  
1,186.754,rs1409812,0.058  
1,186.760,rs1327144,0.058  
1,187.050,rs1339563,0.108  
1,187.136,rs6695173,0.111  
1,187.160,rs8972,0.134  
1,187.165,rs1572766,0.140  
1,187.188,rs10797982,0.145  
1,187.201,rs12131285,0.146  
1,187.212,rs170915,0.146  
1,187.216,rs234089,0.146  
1,187.219,rs10911661,0.146  
1,187.222,rs12127009,0.146  
1,187.223,rs12038919,0.146  
1,187.550,rs10798004,0.146  
1,187.587,rs10489482,0.150  
1,187.595,rs4651260,0.150

1,187.599,rs232295,0.178  
1,187.602,rs1504323,0.170  
1,187.607,rs232298,0.137  
1,187.636,rs10489702,0.111  
1,187.642,rs1321996,0.108  
1,187.713,rs971224,0.116  
1,187.781,rs1321991,0.112  
1,188.051,rs10911789,0.115  
1,188.145,rs10798035,0.112  
1,188.262,rs10489750,0.068  
1,188.271,rs1322375,0.065  
1,188.273,rs651967,0.065  
1,188.387,rs1293989,0.078  
1,188.483,rs1299376,0.078  
1,188.682,rs7514491,0.078  
1,188.691,rs10911898,0.079  
1,188.802,rs7554410,0.085  
1,188.813,rs926324,0.086  
1,188.830,rs3820185,0.087  
1,188.841,rs2076075,0.087  
1,188.845,rs12404877,0.087  
1,188.846,rs10737270,0.087  
1,188.860,rs1980444,0.067  
1,188.903,rs6697145,0.054  
1,188.968,rs1884022,0.046  
1,189.075,rs1924724,0.052  
1,189.113,rs330725,0.047  
1,189.133,rs17590592,0.038  
1,189.141,rs2453727,0.034  
1,189.156,rs2430132,0.037  
1,189.187,rs2311063,0.030  
1,189.201,rs585964,0.027  
1,189.299,rs671564,0.041  
1,189.369,rs7546596,0.053  
1,189.477,rs1994423,0.061  
1,189.507,rs2871869,0.065  
1,189.573,rs1387343,0.068  
1,189.662,rs4255388,0.074  
1,189.674,rs7537197,0.072  
1,190.159,rs7546105,0.029  
1,190.370,rs12128689,0.013  
1,190.381,rs445857,0.013  
1,190.488,rs7531899,0.007  
1,190.643,rs7547422,0.008  
1,190.950,rs12071814,0.009  
1,191.256,rs6428044,0.012  
1,191.332,rs2045121,0.012  
1,191.571,rs10159191,0.011  
1,191.850,rs661322,0.012  
1,192.082,rs1889994,0.013  
1,192.236,rs10494662,0.017  
1,192.353,rs9427802,0.019  
1,192.442,rs12405594,0.022  
1,192.786,rs1937235,0.020  
1,193.066,rs7545533,0.030  
1,193.097,rs2186024,0.030  
1,193.123,rs2476312,0.023  
1,193.137,rs10754013,0.023  
1,193.161,rs10921202,0.014  
1,193.164,rs2984921,0.013  
1,193.166,rs6701700,0.010



1,193.169,rs2760511,0.010  
1,193.195,rs12044559,0.028  
1,193.275,rs17646713,0.036  
1,193.353,rs1417416,0.057  
1,193.533,rs6667670,0.064  
1,193.661,rs2038750,0.080  
1,193.683,rs12729450,0.061  
1,193.713,rs1007460,0.051  
1,193.777,rs4344313,0.050  
1,193.821,rs12057376,0.037  
1,193.826,rs606149,0.036  
1,193.833,rs9943194,0.036  
1,193.889,rs2400382,0.038  
1,193.895,rs2131384,0.039  
1,193.899,rs7550967,0.039  
1,193.952,rs2210331,0.040  
1,194.053,rs598224,0.039  
1,194.093,rs6688980,0.042  
1,194.150,rs1324707,0.048  
1,194.198,rs12563798,0.053  
1,194.290,rs1339556,0.058  
1,194.413,rs10754147,0.056  
1,194.422,rs10921897,0.059  
1,194.462,rs2989965,0.060  
1,194.533,rs2923889,0.064  
1,194.542,rs1376803,0.086  
1,194.552,rs3008552,0.086  
1,194.558,rs10921984,0.070  
1,194.574,rs7517337,0.097  
1,194.587,rs10801499,0.107  
1,194.630,rs1160224,0.112  
1,194.633,rs17636783,0.113  
1,194.640,rs17688176,0.114  
1,194.727,rs10801520,0.137  
1,194.741,rs2094029,0.138  
1,194.818,rs2181948,0.141  
1,194.905,rs12075206,0.151  
1,195.015,rs6667243,0.135  
1,195.098,rs3762271,0.138  
1,195.225,rs10801601,0.149  
1,195.254,rs2786106,0.143  
1,195.330,rs7514167,0.127  
1,195.371,rs2287537,0.119  
1,195.603,rs2047539,0.090  
1,195.646,rs2065150,0.105  
1,195.773,rs6671879,0.106  
1,196.110,rs6428467,0.068  
1,196.149,rs12742531,0.067  
1,196.327,rs12120762,0.062  
1,196.473,rs12406238,0.062  
1,196.556,rs10919605,0.063  
1,196.785,rs427790,0.047  
1,196.871,rs12402922,0.054  
1,196.897,rs10800619,0.058  
1,196.953,rs9663039,0.076  
1,197.017,rs1561144,0.099  
1,197.400,rs1571147,0.117  
1,197.541,rs7540552,0.125  
1,198.086,rs12062734,0.157  
1,198.377,rs10800646,0.175  
1,198.405,rs12725952,0.176

1,198.731,rs2435240,0.182  
1,198.739,rs1425791,0.182  
1,198.885,rs6677214,0.186  
1,199.177,rs4465241,0.198  
1,199.444,rs2816913,0.213  
1,199.524,rs2821313,0.210  
1,199.567,rs2737665,0.208  
1,199.585,rs2816999,0.208  
1,199.710,rs2821338,0.211  
1,199.832,rs3790791,0.204  
1,199.883,rs2690035,0.217  
1,199.887,rs1060061,0.219  
1,199.958,rs12088130,0.248  
1,200.081,rs3861927,0.226  
1,200.544,rs4427435,0.214  
1,200.617,rs10919946,0.188  
1,200.637,rs6427832,0.180  
1,200.648,rs6680807,0.148  
1,200.841,rs10494824,0.101  
1,200.954,rs6665604,0.086  
1,201.041,rs4915451,0.085  
1,201.135,rs10494819,0.090  
1,201.145,rs7517998,0.090  
1,201.317,rs6697899,0.078  
1,201.642,rs12089839,0.059  
1,201.735,rs10920099,0.052  
1,201.811,rs16847613,0.050  
1,201.854,rs7539618,0.051  
1,201.880,rs2296383,0.051  
1,201.899,rs6699862,0.050  
1,201.908,rs10449267,0.042  
1,201.914,rs12022389,0.037  
1,201.933,rs2281845,0.036  
1,202.002,rs6703834,0.027  
1,202.043,rs7542768,0.021  
1,202.065,rs863826,0.021  
1,202.147,rs7533096,0.019  
1,202.160,rs947379,0.019  
1,202.220,rs3738270,0.019  
1,202.318,rs2078570,0.018  
1,202.328,rs16848183,0.018  
1,202.333,rs4915501,0.017  
1,202.351,rs832179,0.017  
1,202.558,rs2275864,0.019  
1,202.628,rs2799677,0.019  
1,202.662,rs2799685,0.016  
1,202.779,rs10494830,0.010  
1,202.814,rs12090950,0.011  
1,202.817,rs6690874,0.011  
1,202.885,rs675508,0.006  
1,202.907,rs10800784,0.004  
1,202.952,rs12135020,0.002  
1,203.055,rs12030585,-0.000  
1,203.089,rs4915236,-0.001  
1,203.176,rs483489,-0.003  
1,203.212,rs1555936,-0.004  
1,203.290,rs1736450,-0.008  
1,203.326,rs586688,-0.012  
1,203.515,rs4950838,-0.027  
1,203.557,rs239980,-0.028  
1,203.591,rs507068,-0.028

1,203.696,rs2820289,-0.025  
1,204.353,rs2047264,-0.014  
1,204.355,rs2820327,-0.017  
1,204.357,rs17473434,-0.021  
1,204.360,rs16849483,-0.024  
1,204.361,rs10920300,-0.024  
1,204.364,rs4950760,-0.016  
1,204.371,rs10800813,-0.010  
1,204.374,rs4436441,-0.010  
1,204.377,rs4363479,-0.013  
1,204.378,rs10920338,-0.014  
1,204.379,rs4359077,-0.008  
1,204.384,rs10920362,-0.003  
1,204.385,rs2860229,-0.002  
1,204.391,rs2993444,-0.002  
1,204.396,rs788815,-0.002  
1,204.412,rs17490864,-0.002  
1,204.417,rs12137988,-0.002  
1,204.529,rs1417478,-0.001  
1,204.834,rs11585565,-0.001  
1,204.838,rs867315,-0.003  
1,204.919,rs4072661,-0.002  
1,204.920,rs4400672,-0.002  
1,205.068,rs4245713,-0.002  
1,205.114,rs4950949,-0.001  
1,205.161,rs11590469,-0.004  
1,205.200,rs4950887,-0.004  
1,205.264,rs1342387,-0.006  
1,205.266,rs2275735,-0.006  
1,205.338,rs782810,-0.009  
1,205.401,rs1774847,-0.005  
1,205.421,rs782803,-0.002  
1,205.440,rs754894,-0.002  
1,205.444,rs12130133,-0.002  
1,205.588,rs4950921,-0.012  
1,205.601,rs10800901,-0.013  
1,205.659,rs762625,-0.014  
1,205.672,rs880633,-0.014  
1,205.699,rs2486064,-0.013  
1,205.707,rs2486949,-0.013  
1,205.708,rs12042412,-0.013  
1,205.724,rs17466945,-0.013  
1,205.791,rs7537408,-0.011  
1,205.844,rs871850,-0.009  
1,205.878,rs4971234,-0.006  
1,205.953,rs7543148,-0.002  
1,205.985,rs1891175,-0.001  
1,205.987,rs10800919,-0.001  
1,206.035,rs10800925,-0.005  
1,206.088,rs10920651,-0.010  
1,206.416,rs12120868,-0.000  
1,206.499,rs16852017,0.000  
1,206.513,rs4951357,0.000  
1,206.537,rs4951073,-0.000  
1,206.538,rs7529482,-0.000  
1,206.575,rs6655965,-0.000  
1,206.719,rs872032,-0.000  
1,206.774,rs12069734,-0.000  
1,206.966,rs9438454,-0.001  
1,207.027,rs2810624,-0.003  
1,207.071,rs2796433,-0.006

1,207.190,rs12023823,-0.014  
1,207.203,rs940657,-0.014  
1,207.222,rs6593993,-0.015  
1,207.244,rs12563446,-0.010  
1,207.245,rs4951304,-0.010  
1,207.259,rs2037679,-0.008  
1,207.285,rs1138617,-0.009  
1,207.315,rs4951309,-0.008  
1,207.368,rs7539596,-0.008  
1,207.415,rs3924586,-0.005  
1,207.541,rs4951056,-0.014  
1,207.599,rs7525113,-0.014  
1,207.710,rs10494855,-0.008  
1,207.732,rs955323,-0.007  
1,207.753,rs1980051,-0.007  
1,207.769,rs2942121,-0.004  
1,207.770,rs3106364,-0.004  
1,207.778,rs11240735,-0.003  
1,207.798,rs2942133,-0.003  
1,207.862,rs12031854,-0.005  
1,207.952,rs7554895,-0.006  
1,208.038,rs4252690,-0.008  
1,208.256,rs11801229,-0.014  
1,208.264,rs4951090,-0.014  
1,208.282,rs12079489,-0.011  
1,208.293,rs1610399,-0.010  
1,208.336,rs2782524,-0.013  
1,208.822,rs2759282,-0.042  
1,208.828,rs11240302,-0.032  
1,208.840,rs16854617,-0.034  
1,208.889,rs2997505,-0.047  
1,208.956,rs2802851,-0.055  
1,209.053,rs7543481,-0.056  
1,209.060,rs6685118,-0.056  
1,209.083,rs12064077,-0.055  
1,209.099,rs6663324,-0.054  
1,209.136,rs3820336,-0.053  
1,209.153,rs16854920,-0.052  
1,209.180,rs2802842,-0.049  
1,209.471,rs1078362,-0.030  
1,209.519,rs4951182,-0.029  
1,209.588,rs2275869,-0.033  
1,209.590,rs11110304,-0.033  
1,209.641,rs10900479,-0.027  
1,209.654,rs6661074,-0.020  
1,209.670,rs1338624,-0.023  
1,209.684,rs1999131,-0.014  
1,209.686,rs10900493,-0.013  
1,209.693,rs17346947,-0.030  
1,209.702,rs734773,-0.047  
1,209.705,rs10900498,-0.051  
1,209.709,rs1105822,-0.053  
1,209.719,rs12751472,-0.058  
1,209.739,rs3795550,-0.052  
1,209.756,rs1114126,-0.047  
1,209.758,rs6661827,-0.047  
1,209.804,rs2027527,-0.047  
1,209.831,rs1361754,-0.046  
1,209.840,rs7364618,-0.063  
1,210.693,rs17006055,-0.050  
1,210.755,rs2336938,-0.048

1,210.789,rs7549189,-0.049  
1,210.814,rs1539243,-0.046  
1,210.849,rs10863430,-0.042  
1,210.941,rs7523985,-0.039  
1,210.952,rs9661909,-0.049  
1,210.997,rs4844540,-0.034  
1,211.077,rs3813972,-0.022  
1,211.096,rs6685813,-0.014  
1,211.103,rs6677934,-0.014  
1,211.119,rs6659397,-0.013  
1,211.282,rs4240844,-0.006  
1,211.313,rs4256810,-0.005  
1,211.429,rs1800896,-0.004  
1,211.460,rs885334,-0.004  
1,211.514,rs12044804,-0.005  
1,211.571,rs2243193,-0.003  
1,211.820,rs2000059,-0.006  
1,211.832,rs1856746,-0.006  
1,211.907,rs11586424,-0.006  
1,212.110,rs11120218,-0.005  
1,212.141,rs4425986,-0.004  
1,212.264,rs7529677,-0.005  
1,212.641,rs11117564,-0.006  
1,212.708,rs10779277,-0.005  
1,212.841,rs17044576,-0.004  
1,212.885,rs6690215,-0.004  
1,213.163,rs10494884,-0.006  
1,213.276,rs2796247,-0.007  
1,213.290,rs7572,-0.007  
1,213.295,rs2259397,-0.006  
1,213.356,rs651480,-0.001  
1,213.357,rs7535719,-0.002  
1,213.374,rs2745945,-0.008  
1,213.381,rs1152832,-0.007  
1,213.461,rs7540179,-0.007  
1,213.527,rs3811390,-0.006  
1,213.530,rs17187133,-0.006  
1,213.535,rs17187140,-0.006  
1,213.540,rs668878,-0.006  
1,213.573,rs2440900,-0.004  
1,213.574,rs11118997,-0.004  
1,213.632,rs1318276,-0.002  
1,213.665,rs2782934,-0.003  
1,213.667,rs6685511,-0.002  
1,213.668,rs12739500,-0.003  
1,213.717,rs1617731,-0.011  
1,213.774,rs2897064,-0.011  
1,213.852,rs696981,-0.007  
1,213.868,rs696977,-0.008  
1,213.949,rs701608,-0.015  
1,213.952,rs1499585,-0.016  
1,213.963,rs696958,-0.018  
1,213.971,rs10863712,-0.018  
1,213.979,rs701627,-0.018  
1,214.020,rs11119075,-0.015  
1,214.077,rs7548249,-0.011  
1,214.085,rs10494901,-0.010  
1,214.124,rs6540478,-0.013  
1,214.189,rs4391668,-0.018  
1,214.196,rs1166864,-0.012  
1,214.256,rs6664062,-0.026

1,214.279,rs1166873,-0.030  
1,214.364,rs17259916,-0.040  
1,214.414,rs1166906,-0.054  
1,214.439,rs1320540,-0.089  
1,214.440,rs4844443,-0.091  
1,214.443,rs4129434,-0.092  
1,214.484,rs1078550,-0.121  
1,214.492,rs6670957,-0.123  
1,214.529,rs1183044,-0.130  
1,214.540,rs10494917,-0.130  
1,214.566,rs6660522,-0.124  
1,214.670,rs2495295,-0.063  
1,214.726,rs1988163,-0.042  
1,214.739,rs2294938,-0.030  
1,214.757,rs7526722,-0.025  
1,214.805,rs6703183,-0.026  
1,214.811,rs11119306,-0.032  
1,214.812,rs6673693,-0.033  
1,214.815,rs10746420,-0.040  
1,214.822,rs7525534,-0.050  
1,214.844,rs9430004,-0.049  
1,214.853,rs2076222,-0.048  
1,214.877,rs742375,-0.049  
1,214.881,rs4844484,-0.029  
1,214.902,rs10863782,-0.028  
1,214.928,rs4844891,-0.020  
1,214.938,rs10489341,-0.021  
1,214.945,rs11119344,-0.022  
1,215.171,rs227178,-0.033  
1,215.314,rs1002382,-0.027  
1,215.488,rs845451,-0.023  
1,215.572,rs615285,-0.032  
1,215.665,rs3765871,-0.033  
1,215.728,rs4601592,-0.041  
1,215.801,rs7554508,-0.050  
1,215.826,rs2206610,-0.041  
1,215.861,rs4537555,-0.040  
1,215.870,rs10863837,-0.039  
1,215.880,rs4628571,-0.044  
1,215.888,rs12401476,-0.035  
1,215.903,rs1890844,-0.020  
1,215.944,rs1418973,-0.017  
1,215.947,rs11119613,-0.018  
1,215.949,rs7556358,-0.018  
1,215.964,rs1110266,-0.019  
1,215.973,rs1125262,-0.020  
1,216.101,rs1501551,-0.031  
1,216.382,rs17188895,-0.021  
1,216.403,rs6540664,-0.022  
1,216.441,rs12134651,-0.022  
1,217.080,rs11119754,-0.028  
1,217.139,rs1777826,-0.021  
1,217.141,rs17695731,-0.020  
1,217.180,rs2165993,-0.013  
1,217.229,rs12030478,-0.009  
1,217.262,rs6692675,-0.007  
1,217.395,rs10429965,-0.003  
1,217.454,rs7513065,-0.000  
1,217.459,rs10494941,-0.000  
1,217.497,rs17494100,-0.000  
1,217.499,rs7512315,-0.000

1,217.543,rs10494942,-0.000  
1,217.602,rs4951426,-0.000  
1,217.911,rs2788140,-0.000  
1,218.046,rs7545292,0.000  
1,218.080,rs11119860,0.001  
1,218.088,rs7550051,0.003  
1,218.089,rs6680653,0.001  
1,218.095,rs12039815,0.001  
1,218.142,rs7527863,0.002  
1,218.152,rs726558,0.002  
1,218.179,rs1342151,0.001  
1,218.229,rs12060029,0.000  
1,218.250,rs3767868,0.000  
1,218.376,rs3122712,-0.001  
1,218.417,rs3795842,-0.002  
1,218.915,rs3123537,-0.004  
1,219.287,rs1655996,-0.001  
1,219.289,rs1699185,-0.001  
1,219.298,rs1656014,-0.002  
1,219.299,rs17694573,-0.002  
1,219.300,rs17020562,-0.002  
1,219.315,rs11120129,-0.009  
1,219.316,rs161441,-0.010  
1,219.323,rs12036568,-0.013  
1,219.333,rs965121,-0.019  
1,219.341,rs10864051,-0.025  
1,219.374,rs4561011,-0.035  
1,219.410,rs11120179,-0.023  
1,219.438,rs11120194,-0.025  
1,219.456,rs12044591,-0.030  
1,219.477,rs2793276,-0.033  
1,219.479,rs11120205,-0.032  
1,219.500,rs10864069,-0.032  
1,219.516,rs1891060,-0.033  
1,219.520,rs17709142,-0.034  
1,219.556,rs12118140,-0.042  
1,219.563,rs2359937,-0.044  
1,219.581,rs1341146,-0.039  
1,219.620,rs11120231,-0.035  
1,219.621,rs11808079,-0.035  
1,219.662,rs4655314,-0.037  
1,219.757,rs4655316,-0.041  
1,219.913,rs920489,-0.036  
1,219.926,rs1795036,-0.036  
1,220.085,rs11589520,-0.038  
1,220.088,rs17022092,-0.038  
1,220.302,rs4265402,-0.037  
1,220.399,rs7519743,-0.038  
1,220.402,rs7544984,-0.038  
1,220.568,rs17022700,-0.034  
1,220.604,rs11120305,-0.031  
1,220.641,rs6676318,-0.028  
1,220.651,rs3013445,-0.027  
1,220.700,rs4636427,-0.019  
1,220.702,rs12129366,-0.018  
1,220.826,rs4394613,-0.007  
1,220.852,rs17733405,-0.011  
1,221.118,rs4311856,-0.024  
1,221.439,rs6687966,-0.025  
1,221.507,rs335570,-0.016  
1,221.752,rs12747547,-0.020

1,222.013,rs1268910,-0.029  
1,222.209,rs11120453,-0.030  
1,222.280,rs7552523,-0.028  
1,222.553,rs1157492,-0.020  
1,223.004,rs12080135,-0.016  
1,223.499,rs7548730,-0.005  
1,223.505,rs2797236,-0.005  
1,223.549,rs2797218,-0.005  
1,223.579,rs4595347,-0.004  
1,223.585,rs2820727,-0.004  
1,223.594,rs12146110,-0.003  
1,223.616,rs7527334,-0.003  
1,223.631,rs4363405,-0.003  
1,223.715,rs7544464,-0.005  
1,223.728,rs1981227,-0.006  
1,223.742,rs1934424,-0.006  
1,223.781,rs531780,-0.007  
1,223.798,rs6540923,-0.007  
1,223.830,rs1821763,-0.008  
1,223.831,rs3856186,-0.008  
1,223.887,rs6657250,-0.002  
1,223.892,rs10864228,-0.002  
1,223.917,rs11587260,-0.001  
1,223.962,rs301734,-0.002  
1,224.020,rs1805049,-0.003  
1,224.136,rs700025,-0.003  
1,224.285,rs12723493,-0.002  
1,224.312,rs4548509,-0.000  
1,224.331,rs4338426,0.000  
1,224.354,rs4360581,0.000  
1,224.375,rs10779265,0.001  
1,224.391,rs1833036,0.002  
1,224.430,rs1984137,0.003  
1,224.515,rs11117644,0.003  
1,224.533,rs10127480,0.003  
1,224.568,rs1416611,0.003  
1,224.604,rs2813703,0.005  
1,224.617,rs10779279,0.006  
1,224.630,rs6693633,0.007  
1,224.659,rs7355008,0.014  
1,224.676,rs12760372,0.015  
1,224.701,rs17044062,0.025  
1,224.750,rs2576262,0.029  
1,224.754,rs1436900,0.025  
1,224.769,rs2576203,0.033  
1,224.785,rs2576269,0.032  
1,224.865,rs17041541,0.032  
1,224.880,rs2789571,0.032  
1,224.896,rs6604651,0.033  
1,224.940,rs4537652,0.038  
1,224.959,rs6604652,0.047  
1,224.991,rs1502352,0.050  
1,224.994,rs7555255,0.043  
1,224.996,rs11117791,0.038  
1,225.036,rs2815211,0.033  
1,225.040,rs2646852,0.035  
1,225.042,rs6665347,0.035  
1,225.062,rs2646850,0.038  
1,225.078,rs2818973,0.053  
1,225.088,rs3790729,0.060  
1,225.101,rs4846419,0.048



1,225.169,rs17726462,0.037  
1,225.216,rs17739539,0.034  
1,225.241,rs871379,0.037  
1,225.253,rs1397178,0.038  
1,225.258,rs10495085,0.038  
1,225.260,rs2136685,0.037  
1,225.340,rs17047242,0.025  
1,225.344,rs12138324,0.024  
1,225.356,rs992010,0.023  
1,225.381,rs2046842,0.022  
1,225.406,rs2377781,0.021  
1,225.421,rs12033297,0.017  
1,225.447,rs683968,0.014  
1,225.516,rs11118065,0.016  
1,225.520,rs12563602,0.016  
1,225.535,rs1338445,0.014  
1,225.578,rs3121580,0.008  
1,225.585,rs11118083,0.008  
1,225.619,rs6662137,0.007  
1,225.631,rs10482750,0.007  
1,225.757,rs3009947,0.009  
1,225.762,rs11118119,0.008  
1,225.777,rs512589,0.007  
1,225.809,rs682483,0.006  
1,225.857,rs2965012,0.010  
1,226.007,rs9431469,0.026  
1,226.067,rs12033283,0.034  
1,226.076,rs6541234,0.035  
1,226.150,rs878394,0.035  
1,226.179,rs626518,0.033  
1,226.255,rs7540160,0.031  
1,226.268,rs17048992,0.030  
1,226.279,rs1256576,0.029  
1,226.390,rs6692892,0.024  
1,226.481,rs10779349,0.020  
1,226.514,rs2791559,0.012  
1,226.527,rs6691390,0.006  
1,226.533,rs2605082,0.004  
1,226.858,rs2066418,0.005  
1,226.922,rs6664521,0.005  
1,226.966,rs17006810,0.002  
1,226.967,rs9787289,0.005  
1,226.975,rs884127,0.004  
1,226.987,rs6700061,0.004  
1,227.145,rs10442693,0.002  
1,227.163,rs2808027,0.002  
1,227.202,rs12040095,0.001  
1,227.246,rs10779402,0.001  
1,227.272,rs6541128,0.001  
1,227.297,rs9803782,0.001  
1,227.300,rs7544009,0.001  
1,227.327,rs7531705,0.006  
1,227.361,rs6670633,0.008  
1,227.480,rs3737297,0.004  
1,227.555,rs7542375,0.001  
1,227.566,rs17009108,0.001  
1,227.587,rs2784264,0.001  
1,227.651,rs11118642,0.000  
1,227.748,rs4846689,0.001  
1,227.846,rs4313406,0.001  
1,227.921,rs10863614,0.001

1,227.979,rs9730262,0.000  
1,227.991,rs12025155,0.000  
1,228.036,rs11118771,-0.000  
1,228.068,rs2176690,-0.001  
1,228.070,rs17010508,-0.001  
1,228.127,rs12091463,-0.008  
1,228.130,rs12134633,-0.008  
1,228.170,rs4240927,-0.010  
1,228.214,rs6673674,-0.010  
1,228.327,rs2800856,-0.034  
1,228.349,rs2584314,-0.034  
1,228.397,rs6702063,-0.021  
1,228.415,rs7513668,-0.020  
1,228.431,rs7518250,-0.020  
1,228.553,rs11485173,-0.017  
1,228.754,rs17464857,-0.027  
1,228.871,rs6683071,-0.063  
1,229.351,rs825130,-0.119  
1,229.386,rs11261280,-0.089  
1,229.397,rs12757009,-0.096  
1,229.398,rs17162164,-0.093  
1,229.403,rs12138067,-0.060  
1,229.422,rs4325124,-0.046  
1,229.436,rs12061221,-0.041  
1,229.531,rs9804135,-0.029  
1,229.601,rs1222154,-0.018  
1,229.748,rs2488513,-0.009  
1,229.755,rs10916197,-0.014  
1,229.848,rs2139155,-0.006  
1,229.873,rs6426088,-0.004  
1,229.949,rs16847945,-0.001  
1,229.994,rs10799573,-0.000  
1,230.093,rs698278,-0.000  
1,230.209,rs791014,-0.000  
1,230.262,rs1561109,-0.000  
1,230.265,rs6426154,-0.000  
1,230.267,rs892978,-0.000  
1,230.268,rs2405523,-0.000  
1,230.377,rs3856143,0.000  
1,230.908,rs3949347,0.002  
1,230.996,rs3795443,0.002  
1,231.002,rs1771316,0.002  
1,231.006,rs1629896,0.002  
1,231.113,rs2769689,0.004  
1,231.150,rs17503834,0.005  
1,231.167,rs16845153,0.005  
1,231.172,rs2840945,0.005  
1,231.178,rs2840956,0.005  
1,231.182,rs7553931,0.005  
1,231.234,rs16845221,0.008  
1,231.267,rs6685014,0.010  
1,231.282,rs4653433,0.012  
1,231.312,rs868966,0.018  
1,231.325,rs1051740,0.013  
1,231.371,rs360102,0.009  
1,231.381,rs4653437,0.008  
1,231.435,rs2038393,0.007  
1,231.560,rs10915928,0.006  
1,231.674,rs10753415,0.005  
1,231.826,rs12567614,0.017  
1,231.952,rs11588657,0.028

1,231.969,rs1151815,0.040  
1,232.024,rs16846117,0.034  
1,232.035,rs837444,0.035  
1,232.061,rs3820632,0.035  
1,232.079,rs10916019,0.036  
1,232.132,rs708766,0.034  
1,232.182,rs3768414,0.029  
1,232.227,rs12033364,0.029  
1,232.232,rs708763,0.029  
1,232.381,rs7513120,0.032  
1,232.474,rs7521639,0.034  
1,232.716,rs7540055,0.035  
1,232.783,rs3014252,0.032  
1,232.829,rs4601553,0.029  
1,232.907,rs903698,0.032  
1,232.926,rs2644140,0.034  
1,233.150,rs2236359,0.028  
1,233.262,rs2313602,0.011  
1,233.497,rs1150907,0.004  
1,233.605,rs3795811,0.002  
1,233.841,rs3795817,0.002  
1,234.223,rs6703541,0.001  
1,234.321,rs12067649,0.001  
1,234.620,rs241301,0.007  
1,234.693,rs12089229,0.004  
1,234.739,rs3923210,0.006  
1,234.763,rs342824,0.006  
1,234.813,rs12029314,0.006  
1,234.827,rs342818,0.006  
1,234.845,rs6695100,0.018  
1,234.940,rs238102,0.002  
1,234.993,rs1002063,0.000  
1,235.025,rs506388,0.001  
1,235.144,rs12734075,-0.000  
1,235.169,rs12040438,-0.001  
1,235.174,rs348334,-0.000  
1,235.278,rs1930903,-0.001  
1,235.345,rs687266,-0.001  
1,235.807,rs6663181,-0.001  
1,235.922,rs6673349,0.000  
1,235.936,rs910820,0.000  
1,236.109,rs754666,-0.001  
1,236.175,rs2144297,-0.001  
1,236.176,rs7538126,-0.001  
1,236.277,rs4846908,-0.001  
1,236.402,rs1124110,-0.003  
1,236.599,rs6703306,-0.006  
1,236.623,rs10864732,-0.007  
1,236.834,rs7552730,-0.020  
1,236.874,rs11576324,-0.022  
1,236.904,rs2273970,-0.025  
1,236.905,rs2273967,-0.025  
1,236.918,rs9431818,-0.025  
1,236.936,rs6687864,-0.025  
1,237.005,rs4846854,-0.027  
1,237.013,rs730087,-0.012  
1,237.192,rs10864745,-0.009  
1,237.241,rs721532,-0.011  
1,237.280,rs1545969,-0.013  
1,237.339,rs11586533,-0.008  
1,237.404,rs17599139,-0.008

1,237.482,rs701157,-0.009  
1,237.496,rs853444,-0.008  
1,237.500,rs701164,-0.008  
1,237.501,rs16851934,-0.014  
1,237.608,rs853463,-0.001  
1,237.656,rs927888,-0.001  
1,237.660,rs1078197,-0.001  
1,237.681,rs12405479,-0.001  
1,237.713,rs2281951,-0.002  
1,237.721,rs3789643,-0.002  
1,237.732,rs943579,-0.002  
1,237.736,rs1467670,-0.002  
1,237.786,rs699,-0.001  
1,237.877,rs3790955,-0.000  
1,238.001,rs1202543,0.001  
1,238.002,rs11122614,0.001  
1,238.013,rs3748771,0.002  
1,238.167,rs3748775,0.011  
1,238.178,rs12093178,0.011  
1,238.260,rs13374343,0.013  
1,238.338,rs4304564,0.015  
1,238.349,rs4506448,0.015  
1,238.368,rs4378192,0.012  
1,238.400,rs10864662,0.008  
1,238.429,rs6674245,0.005  
1,238.476,rs7518479,0.010  
1,238.523,rs2180275,0.008  
1,238.639,rs1998027,0.008  
1,238.705,rs16854012,0.006  
1,238.844,rs203745,0.007  
1,238.851,rs12047385,0.007  
1,239.217,rs1769807,0.008  
1,239.355,rs6655954,0.011  
1,239.360,rs1765777,0.011  
1,239.531,rs16854785,0.010  
1,239.572,rs1934909,0.009  
1,239.618,rs4658883,0.009  
1,239.635,rs16854903,0.009  
1,239.674,rs7534681,0.008  
1,239.681,rs16854954,0.014  
1,239.756,rs2295959,0.011  
1,239.766,rs2759329,0.011  
1,239.787,rs7551537,0.010  
1,239.862,rs9432040,0.012  
1,239.893,rs967433,0.010  
1,239.966,rs701158,0.001  
1,239.977,rs9431732,0.001  
1,239.997,rs2772122,0.000  
1,240.098,rs16856152,0.002  
1,240.100,rs821631,0.002  
1,240.118,rs3524,0.002  
1,240.233,rs10864713,0.002  
1,240.311,rs1888601,0.003  
1,240.332,rs1571757,0.005  
1,240.404,rs16856640,0.011  
1,240.457,rs7411832,0.015  
1,240.536,rs4596830,0.019  
1,240.569,rs4564083,0.020  
1,240.579,rs9660420,0.020  
1,240.607,rs16856752,0.014  
1,240.612,rs12070718,0.014

1,240.649,rs1338300,0.022  
1,240.700,rs9660150,0.017  
1,240.706,rs9661059,0.017  
1,240.709,rs789360,0.016  
1,240.723,rs17176041,0.015  
1,240.799,rs12045182,0.012  
1,240.814,rs1890315,0.013  
1,240.820,rs2884089,0.013  
1,240.859,rs6664207,0.014  
1,240.967,rs12029169,0.015  
1,240.976,rs10910547,0.010  
1,241.030,rs12096229,0.010  
1,241.033,rs789633,0.010  
1,241.057,rs789666,0.012  
1,241.085,rs12072371,0.017  
1,241.117,rs17191808,0.021  
1,241.119,rs11810061,0.021  
1,241.129,rs2210669,0.022  
1,241.189,rs1970168,0.022  
1,241.211,rs9424568,0.030  
1,241.265,rs1986615,0.029  
1,241.441,rs2795425,0.025  
1,241.675,rs12048236,0.029  
1,242.049,rs9424606,0.045  
1,242.191,rs2224402,0.046  
1,243.032,rs10752798,0.037  
1,243.047,rs12059884,0.035  
1,243.310,rs6687497,0.014  
1,243.332,rs6424281,0.014  
1,243.389,rs10910665,0.017  
1,243.511,rs6657737,0.016  
1,243.697,rs701177,0.014  
1,243.786,rs11800619,0.012  
1,243.845,rs7546115,0.010  
1,244.053,rs6667845,0.005  
1,244.132,rs1294330,0.007  
1,244.151,rs10797448,0.008  
1,244.163,rs10737197,0.010  
1,244.180,rs10910157,0.014  
1,244.187,rs6687087,0.013  
1,244.221,rs6687124,0.011  
1,244.224,rs4233060,0.014  
1,244.247,rs780225,0.022  
1,244.264,rs6660091,0.029  
1,244.276,rs6681321,0.027  
1,244.284,rs2226114,0.025  
1,244.293,rs701204,0.006  
1,244.294,rs701209,0.004  
1,244.298,rs701220,0.002  
1,244.311,rs701232,0.002  
1,244.328,rs595191,0.002  
1,244.343,rs12239323,0.003  
1,244.380,rs12026196,0.004  
1,244.391,rs12068756,0.004  
1,244.555,rs1160305,0.015  
1,244.737,rs11576361,0.019  
1,244.783,rs4506523,0.020  
1,244.878,rs4348787,0.023  
1,244.894,rs7541879,0.023  
1,244.979,rs6662498,0.023  
1,245.264,rs12565924,0.022

1,245.366,rs2067795,0.022  
1,245.647,rs4333882,0.026  
1,245.663,rs622815,0.026  
1,245.762,rs487890,0.023  
1,245.835,rs10910404,0.027  
1,245.880,rs480039,0.030  
1,245.881,rs477265,0.030  
1,245.895,rs517527,0.028  
1,245.910,rs501664,0.018  
1,245.955,rs561159,0.015  
1,245.964,rs1407149,0.014  
1,246.013,rs4128841,0.011  
1,246.055,rs3001707,0.010  
1,246.084,rs2991956,0.010  
1,246.137,rs6698335,0.007  
1,246.212,rs4027040,0.007  
1,246.248,rs17517734,0.006  
1,246.374,rs3768286,0.003  
1,246.384,rs270524,0.003  
1,246.434,rs270505,0.004  
1,246.537,rs3951276,0.004  
1,246.611,rs696859,0.002  
1,246.919,rs12058613,0.006  
1,247.039,rs624203,0.005  
1,247.115,rs478425,0.010  
1,247.138,rs16843932,0.014  
1,247.144,rs4920270,0.015  
1,247.185,rs2587531,0.019  
1,247.187,rs2582650,0.019  
1,247.225,rs4626924,0.021  
1,247.448,rs6586430,0.026  
1,247.472,rs10797566,0.026  
1,247.517,rs2673968,0.025  
1,247.595,rs938455,0.027  
1,247.619,rs7532165,0.028  
1,247.665,rs2674002,0.025  
1,247.673,rs2802928,0.018  
1,247.678,rs10910536,0.012  
1,247.732,rs6586361,0.012  
1,248.050,rs9659229,0.029  
1,248.711,rs6699315,0.047  
1,248.744,rs12745648,0.050  
1,249.202,rs488618,0.087  
1,249.288,rs4659946,0.089  
1,249.336,rs11800419,0.092  
1,249.352,rs6429206,0.093  
1,249.409,rs10159416,0.114  
1,249.494,rs7545788,0.100  
1,250.110,rs4660131,0.118  
1,250.142,rs17616115,0.114  
1,250.197,rs3213190,0.117  
1,250.232,rs4660139,0.119  
1,250.298,rs12411075,0.100  
1,250.317,rs6429466,0.093  
1,250.413,rs964114,0.099  
1,250.535,rs2064917,0.120  
1,250.562,rs10802244,0.140  
1,250.571,rs6689479,0.148  
1,250.604,rs911271,0.182  
1,250.651,rs7537965,0.210  
1,250.669,rs13374732,0.217

1,251.084,rs609516,0.286  
1,251.104,rs605998,0.286  
1,251.189,rs4659660,0.310  
1,251.327,rs637489,0.259  
1,251.343,rs17582358,0.247  
1,251.356,rs7512191,0.232  
1,251.391,rs585273,0.217  
1,251.453,rs7513978,0.222  
1,251.477,rs6689881,0.230  
1,251.501,rs1266381,0.232  
1,251.502,rs10802546,0.259  
1,251.508,rs12041958,0.239  
1,251.510,rs2799426,0.233  
1,251.511,rs10925158,0.233  
1,251.665,rs2794763,0.248  
1,251.960,rs707210,0.219  
1,251.977,rs1418071,0.215  
1,252.058,rs2297955,0.192  
1,252.092,rs7522310,0.180  
1,252.139,rs10925228,0.178  
1,252.306,rs2275568,0.167  
1,252.411,rs16834527,0.160  
1,252.536,rs7545717,0.152  
1,252.581,rs6683896,0.150  
1,252.584,rs4492605,0.150  
1,252.621,rs12133452,0.149  
1,252.667,rs1252160,0.140  
1,252.671,rs12410379,0.134  
1,252.682,rs4659764,0.117  
1,252.688,rs10925289,0.113  
1,252.697,rs12724972,0.106  
1,252.750,rs2385576,0.061  
1,252.792,rs10925300,0.053  
1,252.818,rs16834780,0.042  
1,252.865,rs6684412,0.023  
1,252.900,rs7551249,0.018  
1,252.919,rs6696837,0.018  
1,252.940,rs11810113,0.017  
1,253.025,rs1409052,0.009  
1,253.169,rs628414,0.006  
1,253.217,rs10495391,0.006  
1,253.282,rs918241,0.006  
1,253.289,rs10495392,0.006  
1,253.318,rs6429004,0.007  
1,253.328,rs1345497,0.007  
1,253.330,rs10802598,0.007  
1,253.404,rs7514255,0.003  
1,253.416,rs10925387,0.003  
1,253.438,rs10925401,0.005  
1,253.482,rs10925415,0.014  
1,253.568,rs6429023,0.020  
1,253.673,rs2618693,0.016  
1,253.773,rs2779394,0.017  
1,253.892,rs1717783,0.020  
1,253.935,rs939698,0.011  
1,253.989,rs490057,0.005  
1,254.070,rs1464459,0.002  
1,254.197,rs12086956,0.001  
1,254.210,rs10925501,0.001  
1,254.284,rs2250079,0.001  
1,254.321,rs12737847,0.000

1,254.439,rs6695129,0.000  
1,254.465,rs6703045,0.000  
1,254.713,rs2499604,0.000  
1,254.902,rs1340456,-0.000  
1,255.201,rs16836417,-0.001  
1,255.433,rs7543909,-0.001  
1,255.495,rs9661467,-0.001  
1,255.556,rs12094201,-0.001  
1,255.619,rs259593,-0.001  
1,255.785,rs10737826,-0.001  
1,255.808,rs1021358,-0.001  
1,255.895,rs12131363,-0.004  
1,255.902,rs12067134,-0.004  
1,255.905,rs6672226,-0.004  
1,255.980,rs10925652,-0.007  
1,256.003,rs10157478,-0.007  
1,256.138,rs1327896,-0.008  
1,256.210,rs491556,-0.030  
1,256.245,rs789099,-0.045  
1,256.262,rs1002726,-0.046  
1,256.291,rs2653910,-0.047  
1,256.379,rs2494076,-0.048  
1,256.538,rs2174076,-0.046  
1,257.056,rs10925747,-0.038  
1,257.205,rs2841407,-0.036  
1,257.348,rs2689128,-0.037  
1,257.502,rs2689160,-0.033  
1,257.646,rs10495426,-0.024  
1,257.791,rs12145112,-0.013  
1,257.793,rs9428818,-0.012  
1,257.854,rs10925806,-0.005  
1,257.870,rs12041748,-0.005  
1,257.913,rs1509689,-0.002  
1,257.939,rs4659902,-0.003  
1,258.005,rs4659904,-0.001  
1,258.036,rs1112903,-0.003  
1,258.043,rs6703086,-0.003  
1,258.445,rs2790634,-0.000  
1,258.490,rs16838192,-0.000  
1,258.934,rs1796835,0.002  
1,259.160,rs1782349,0.006  
1,259.385,rs2278642,0.016  
1,259.587,rs843030,0.029  
1,259.593,rs17657156,0.029  
1,259.685,rs665159,0.030  
1,259.716,rs6690809,0.041  
1,259.743,rs4523505,0.040  
1,259.803,rs602117,0.039  
1,259.825,rs10925994,0.035  
1,259.958,rs12036109,0.015  
1,259.987,rs10495449,0.006  
1,260.071,rs12563039,0.004  
1,260.107,rs1903630,0.003  
1,260.199,rs7539606,0.000  
1,260.269,rs2066298,0.000  
1,260.330,rs10926087,0.000  
1,260.377,rs11579499,0.000  
1,260.385,rs10495457,0.000  
1,260.532,rs11810574,0.005  
1,260.546,rs10926135,0.005  
1,261.042,rs10495466,0.008



1,261.077,rs9660912,0.008  
1,261.100,rs9662927,0.012  
1,261.116,rs12563220,0.017  
1,261.191,rs1414659,0.029  
1,261.195,rs1414657,0.029  
1,261.214,rs4659573,0.029  
1,261.236,rs12410581,0.027  
1,261.238,rs12096679,0.018  
1,261.265,rs10495470,0.021  
1,261.298,rs11578184,0.024  
1,261.305,rs9661430,0.026  
1,261.307,rs9661714,0.019  
1,261.327,rs10802881,0.030  
1,261.343,rs10465630,0.037  
1,261.359,rs7540147,0.047  
1,261.364,rs6702434,0.044  
1,261.394,rs3748540,0.048  
1,261.417,rs10495471,0.040  
1,261.430,rs12069813,0.040  
1,261.546,rs11578889,0.012  
1,261.555,rs7546054,0.006  
1,261.565,rs12126125,0.006  
1,261.592,rs6429215,0.004  
1,261.595,rs4659986,0.004  
1,261.623,rs6429216,0.001  
1,261.683,rs4659996,0.000  
1,261.703,rs6696418,0.001  
1,261.729,rs7536260,0.001  
1,261.747,rs6683045,0.001  
1,261.752,rs10802903,0.001  
1,261.774,rs947667,0.001  
1,262.161,rs3820259,0.007  
1,262.217,rs13376172,0.008  
1,262.730,rs261804,0.004  
1,262.733,rs6697598,0.004  
1,262.759,rs6429230,0.008  
1,262.774,rs10802917,0.007  
1,262.800,rs546547,0.009  
1,262.808,rs523361,0.006  
1,262.827,rs12059322,0.009  
1,262.861,rs1878729,0.014  
1,262.909,rs6429241,0.027  
1,262.943,rs4660036,0.034  
1,262.956,rs6667456,0.034  
1,263.008,rs2686240,0.030  
1,263.017,rs1879744,0.029  
1,263.039,rs4660051,0.025  
1,263.060,rs10737856,0.031  
1,263.063,rs9782891,0.042  
1,263.086,rs1341468,0.038  
1,263.105,rs10802949,0.024  
1,263.108,rs10802951,0.022  
1,263.122,rs12038803,0.020  
1,263.134,rs4660075,0.023  
1,263.148,rs1557078,0.021  
1,263.163,rs1557079,0.018  
1,263.179,rs10926483,0.024  
1,263.182,rs1544190,0.046  
1,263.231,rs10754728,0.052  
1,263.290,rs1932440,0.034  
1,263.298,rs2050505,0.033

1,263.299,rs12410855,0.034  
1,263.302,rs12079041,0.033  
1,263.306,rs3007738,0.029  
1,263.315,rs2275163,0.032  
1,263.339,rs1053230,0.026  
1,263.345,rs650833,0.023  
1,263.389,rs663814,0.006  
1,263.393,rs10802975,0.006  
1,263.409,rs6429288,0.006  
1,263.429,rs12133073,0.001  
1,263.432,rs9428886,0.001  
1,263.465,rs6690359,0.001  
1,263.541,rs9428895,0.008  
1,263.564,rs6691782,0.011  
1,263.595,rs735943,0.005  
1,263.606,rs1047840,0.001  
1,263.622,rs4658535,0.000  
1,263.633,rs12568965,0.001  
1,263.636,rs6660916,0.005  
1,263.648,rs4658565,0.009  
1,263.650,rs7516206,0.009  
1,263.658,rs3845563,0.009  
1,263.802,rs4274045,0.008  
1,263.816,rs10926623,0.008  
1,263.945,rs1847097,0.010  
1,264.018,rs390956,0.007  
1,264.364,rs3863747,0.007  
1,264.709,rs2796135,0.001  
1,264.807,rs7545843,0.001  
1,264.935,rs2654882,0.001  
1,265.050,rs10926748,0.003  
1,265.136,rs10803047,0.007  
1,265.141,rs6429360,0.007  
1,265.231,rs2654894,0.009  
1,265.298,rs2810011,0.010  
1,265.317,rs11576273,0.011  
1,265.347,rs11804678,0.014  
1,265.520,rs1938341,0.037  
1,265.898,rs11580100,0.034  
1,266.101,rs10926828,0.021  
1,266.171,rs914940,0.016  
1,266.307,rs10803083,0.013  
1,266.344,rs7514112,0.013  
1,266.417,rs10803086,0.011  
1,266.676,rs12407970,0.006  
1,266.835,rs4658504,0.004  
1,267.009,rs6679417,0.002  
1,267.037,rs3003542,0.002  
1,268.011,rs4658538,0.004  
1,268.815,rs2490400,0.007  
1,268.840,rs2802723,0.007  
1,269.209,rs2039838,0.004  
1,269.434,rs9428576,0.007  
1,269.525,rs1121276,0.002  
1,270.164,rs4658597,0.001  
1,270.284,rs472276,0.001  
1,270.426,rs1000543,-0.000  
1,270.442,rs7512607,-0.001  
1,270.489,rs11590416,-0.007  
1,270.504,rs2353097,-0.008  
1,270.534,rs2454228,-0.008

1,270.564,rs4658613,-0.008  
1,270.616,rs10927137,-0.006  
1,270.635,rs12402376,-0.007  
1,270.666,rs12131999,-0.009  
1,270.675,rs10803181,-0.008  
1,270.703,rs12087666,-0.002  
1,270.748,rs9659599,-0.000  
1,270.769,rs12032278,-0.000  
1,270.790,rs4634891,0.000  
1,270.807,rs12048859,0.000  
1,270.811,rs12139694,0.000  
1,270.813,rs879065,0.000  
1,270.890,rs721842,0.001  
1,270.927,rs651529,0.004  
1,270.979,rs3120118,0.006  
1,271.026,rs497436,0.009  
1,271.030,rs6663981,0.009  
1,271.078,rs11580053,0.005  
1,271.100,rs3102463,0.003  
1,271.155,rs6429464,0.003  
1,271.164,rs12087973,0.003  
1,271.303,rs3003301,0.001  
1,271.540,rs10803228,0.004  
1,271.699,rs12057937,0.022  
1,271.746,rs11577325,0.027  
1,271.755,rs7550312,0.026  
1,271.810,rs2134271,0.019  
1,271.836,rs9661248,0.019  
1,271.877,rs9662967,0.016  
1,271.897,rs2365685,0.013  
1,271.952,rs10927330,0.010  
1,272.127,rs6684661,0.025  
1,272.144,rs6676378,0.028  
1,272.154,rs6429511,0.027  
1,272.178,rs7540416,0.033  
1,272.393,rs4658690,0.042  
1,272.447,rs4658698,0.039  
1,272.471,rs4072543,0.037  
1,272.476,rs6693918,0.037  
1,272.484,rs6672147,0.039  
1,272.535,rs6676019,0.056  
1,272.556,rs12039117,0.060  
1,272.570,rs6656693,0.063  
1,272.572,rs4658714,0.066  
1,272.582,rs6661783,0.088  
1,272.587,rs3795475,0.089  
1,272.621,rs6428904,0.083  
1,272.644,rs7549180,0.079  
1,272.791,rs12084148,0.058  
1,272.798,rs12239562,0.057  
1,272.839,rs4658749,0.052  
1,272.924,rs1173847,0.052  
1,272.973,rs819876,0.044  
1,273.021,rs1111813,0.050  
1,273.029,rs1773825,0.055  
1,273.056,rs704649,0.067  
1,273.070,rs1093937,0.074  
1,273.115,rs1093920,0.083  
1,273.120,rs1538472,0.083  
1,273.122,rs6428923,0.084  
1,273.145,rs12089406,0.088

1,273.153,rs1538467,0.076  
1,273.207,rs6662614,0.093  
1,273.237,rs6690046,0.087  
1,273.243,rs10802219,0.085  
1,273.251,rs7536825,0.100  
1,273.253,rs9919234,0.103  
1,273.298,rs6687026,0.116  
1,273.354,rs7550851,0.116  
1,273.408,rs1771522,0.117  
1,273.479,rs6701020,0.118  
1,273.554,rs871840,0.120  
1,273.666,rs10802264,0.158  
1,273.741,rs6687221,0.176  
1,273.777,rs2791390,0.187  
1,273.793,rs2791398,0.196  
1,273.795,rs2791400,0.198  
1,273.866,rs12088171,0.193  
1,273.894,rs9729771,0.211  
1,274.037,rs10924388,0.173  
1,274.114,rs6695221,0.156  
1,274.171,rs4654180,0.157  
1,274.489,rs7551290,0.191  
1,274.585,rs12128836,0.191  
1,274.749,rs12760011,0.189  
1,275.001,rs1339965,0.188  
1,275.198,rs7537318,0.171  
1,275.301,rs10924772,0.162  
1,275.343,rs4654291,0.164  
1,275.404,rs4531261,0.168  
1,275.553,rs3124089,0.184  
1,275.604,rs4072061,0.191  
1,275.670,rs10802440,0.207  
1,275.794,rs6699332,0.211  
1,275.833,rs6694274,0.212  
1,275.913,rs10924848,0.198  
1,275.945,rs7549408,0.199  
1,276.147,rs1691234,0.212  
1,276.333,rs2255481,0.223  
1,276.565,rs7521596,0.203  
1,276.575,rs6663210,0.201  
1,276.623,rs1609840,0.196  
1,276.764,rs12118988,0.176  
1,276.967,rs10737800,0.174  
1,276.987,rs6702432,0.174  
1,277.034,rs10399672,0.177  
1,277.046,rs12130139,0.178  
1,277.064,rs7542425,0.180  
1,277.133,rs4925650,0.176  
1,277.143,rs3738447,0.167  
1,277.181,rs10159239,0.154  
1,277.214,rs10737808,0.157  
1,277.244,rs10802514,0.153  
1,277.364,rs10802521,0.143  
1,277.368,rs6426255,0.142  
1,277.413,rs3862182,0.117  
1,277.481,rs869111,0.108  
1,277.541,rs1144815,0.109  
1,277.838,rs10788785,0.090  
1,277.846,rs10888379,0.090  
1,278.075,rs4925753,0.129  
1,278.087,rs11204538,0.130

1,278.114,rs10888267,0.131  
1,278.258,rs6664332,0.131  
1,278.569,rs11204592,0.123  
1,278.850,rs6587440,0.113  
1,278.932,rs10888354,0.111  
1,280.223,rs11205405,0.092  
2,1.878,rs6755432,0.351  
2,2.003,rs10181051,0.350  
2,2.098,rs6717613,0.347  
2,2.113,rs6719944,0.362  
2,2.146,rs6548226,0.389  
2,2.149,rs6548227,0.392  
2,2.202,rs4374407,0.399  
2,2.299,rs2724856,0.422  
2,2.327,rs2724861,0.424  
2,2.444,rs13411762,0.408  
2,2.478,rs2724882,0.409  
2,2.487,rs6712649,0.409  
2,2.513,rs4241319,0.394  
2,2.582,rs9784046,0.343  
2,2.586,rs6728479,0.340  
2,2.616,rs2293084,0.315  
2,2.640,rs1320334,0.327  
2,2.660,rs2867137,0.335  
2,2.725,rs4854369,0.364  
2,2.768,rs10183412,0.389  
2,2.858,rs4533500,0.363  
2,2.865,rs11682609,0.362  
2,2.895,rs4854414,0.356  
2,3.071,rs7598261,0.358  
2,3.107,rs4971336,0.343  
2,3.163,rs4586665,0.311  
2,3.200,rs6716119,0.349  
2,3.261,rs4998208,0.359  
2,3.273,rs4246561,0.362  
2,3.359,rs4971418,0.333  
2,3.485,rs13021490,0.378  
2,3.490,rs4641984,0.379  
2,3.497,rs4927635,0.379  
2,3.553,rs4927600,0.372  
2,3.575,rs4927602,0.368  
2,3.584,rs11897977,0.354  
2,3.627,rs2071402,0.331  
2,3.647,rs1567919,0.334  
2,3.660,rs11891272,0.336  
2,3.707,rs10201842,0.306  
2,3.730,rs10196514,0.303  
2,3.897,rs10183727,0.282  
2,3.907,rs9752743,0.260  
2,3.919,rs6713543,0.266  
2,3.974,rs1544846,0.297  
2,3.989,rs2288184,0.281  
2,4.000,rs2288183,0.270  
2,4.031,rs9917191,0.238  
2,4.103,rs2059412,0.268  
2,4.120,rs6759577,0.276  
2,4.196,rs6728613,0.266  
2,4.359,rs10185662,0.203  
2,4.396,rs891878,0.193  
2,4.435,rs4853811,0.196  
2,4.596,rs751150,0.232

2,4.686,rs2042142,0.262  
2,4.706,rs1465389,0.263  
2,4.860,rs10865533,0.273  
2,4.880,rs4853946,0.305  
2,4.882,rs17247253,0.305  
2,4.957,rs12470297,0.271  
2,4.995,rs10519519,0.248  
2,4.999,rs7588195,0.247  
2,5.204,rs6759198,0.279  
2,5.313,rs6741513,0.285  
2,5.443,rs1706871,0.280  
2,5.572,rs10865530,0.275  
2,5.577,rs13004261,0.275  
2,5.588,rs4853800,0.274  
2,5.639,rs908355,0.259  
2,5.702,rs6548093,0.239  
2,5.714,rs6548091,0.239  
2,5.757,rs7586549,0.239  
2,5.807,rs7586516,0.262  
2,5.823,rs1451199,0.267  
2,5.867,rs4853888,0.267  
2,5.907,rs10202240,0.268  
2,5.937,rs10184017,0.276  
2,5.957,rs1470738,0.319  
2,6.009,rs734614,0.334  
2,6.031,rs6548077,0.320  
2,6.034,rs2385311,0.320  
2,6.085,rs1451197,0.361  
2,6.143,rs730344,0.368  
2,6.154,rs12619156,0.361  
2,6.172,rs2385315,0.349  
2,6.223,rs7569763,0.327  
2,6.268,rs934556,0.294  
2,6.300,rs823231,0.284  
2,6.339,rs823243,0.269  
2,6.454,rs4853851,0.264  
2,6.467,rs17486311,0.264  
2,6.549,rs4853954,0.289  
2,6.572,rs1667060,0.308  
2,6.591,rs1667032,0.327  
2,6.713,rs10210870,0.320  
2,6.732,rs12479004,0.349  
2,6.850,rs12714369,0.344  
2,6.975,rs7592329,0.379  
2,6.981,rs6761955,0.381  
2,7.006,rs7559077,0.354  
2,7.009,rs1078821,0.304  
2,7.009,rs1078819,0.298  
2,7.014,rs6548160,0.329  
2,7.121,rs10208086,0.293  
2,7.449,rs7606684,0.269  
2,7.848,rs7592700,0.237  
2,7.957,rs10205909,0.237  
2,8.100,rs10197283,0.241  
2,8.170,rs6542658,0.229  
2,8.241,rs13017757,0.217  
2,8.245,rs11902670,0.203  
2,8.248,rs13004318,0.190  
2,8.272,rs17017737,0.147  
2,8.277,rs7567724,0.144  
2,8.295,rs2872168,0.141

2,8.433,rs2043080,0.174  
2,8.543,rs2603148,0.193  
2,8.584,rs2249380,0.204  
2,8.654,rs7559461,0.169  
2,8.698,rs11886534,0.191  
2,8.760,rs11903032,0.197  
2,8.805,rs2034732,0.198  
2,8.862,rs722087,0.235  
2,8.870,rs4849997,0.239  
2,8.878,rs4849999,0.247  
2,8.907,rs2313468,0.270  
2,8.916,rs7591808,0.268  
2,8.961,rs883258,0.266  
2,9.102,rs12464708,0.272  
2,9.168,rs4372915,0.269  
2,9.224,rs4850024,0.266  
2,9.425,rs1545136,0.260  
2,9.501,rs1437701,0.274  
2,9.536,rs6714273,0.245  
2,9.751,rs6542691,0.295  
2,9.752,rs7574256,0.294  
2,9.779,rs7419807,0.268  
2,9.828,rs6542697,0.275  
2,9.885,rs7589994,0.311  
2,9.925,rs17019005,0.322  
2,9.928,rs4585039,0.323  
2,10.063,rs6542706,0.292  
2,10.164,rs10165034,0.260  
2,10.210,rs2677912,0.246  
2,10.318,rs589804,0.266  
2,10.510,rs9308783,0.274  
2,10.698,rs4849968,0.278  
2,10.864,rs957504,0.253  
2,10.913,rs17019820,0.246  
2,11.184,rs6542644,0.247  
2,11.267,rs721087,0.224  
2,11.295,rs6422705,0.215  
2,11.314,rs11123605,0.207  
2,11.319,rs6422704,0.206  
2,11.349,rs2872977,0.200  
2,11.905,rs766144,0.172  
2,11.980,rs1869408,0.172  
2,12.009,rs1453798,0.151  
2,12.016,rs4670034,0.146  
2,12.056,rs4668488,0.111  
2,12.094,rs13421030,0.114  
2,12.195,rs4462764,0.142  
2,12.356,rs4669198,0.136  
2,12.418,rs13010129,0.133  
2,12.498,rs6734151,0.129  
2,12.542,rs2349682,0.141  
2,12.543,rs6727285,0.141  
2,12.572,rs10929519,0.156  
2,12.592,rs1524490,0.162  
2,12.613,rs6720039,0.166  
2,12.646,rs792102,0.161  
2,12.657,rs792111,0.162  
2,12.718,rs17291890,0.150  
2,12.751,rs10495519,0.150  
2,12.794,rs969768,0.148  
2,12.800,rs4668614,0.125

2,12.802,rs792071,0.118  
2,12.843,rs10194520,0.136  
2,12.865,rs4669392,0.148  
2,13.031,rs2882274,0.116  
2,13.139,rs7557343,0.120  
2,13.191,rs10171668,0.125  
2,13.354,rs4547512,0.144  
2,13.436,rs7596062,0.139  
2,13.492,rs2564050,0.137  
2,13.524,rs2722602,0.157  
2,13.544,rs16864146,0.159  
2,13.648,rs2722583,0.165  
2,13.724,rs2709447,0.169  
2,13.769,rs2163025,0.163  
2,13.797,rs6750041,0.158  
2,13.808,rs891251,0.156  
2,13.909,rs2350571,0.134  
2,13.916,rs4257373,0.133  
2,13.929,rs10495528,0.131  
2,13.937,rs4293540,0.129  
2,13.973,rs4669966,0.122  
2,14.062,rs11691189,0.124  
2,14.089,rs2709437,0.122  
2,14.132,rs941009,0.118  
2,14.313,rs1818962,0.108  
2,14.409,rs2693889,0.122  
2,14.449,rs1526374,0.128  
2,14.545,rs7566793,0.157  
2,14.716,rs10519722,0.174  
2,14.813,rs12623864,0.179  
2,14.861,rs751394,0.206  
2,14.912,rs7591996,0.191  
2,14.923,rs6751561,0.187  
2,15.132,rs6723180,0.136  
2,15.223,rs16865345,0.118  
2,15.442,rs10495541,0.137  
2,15.519,rs930978,0.139  
2,15.685,rs308001,0.122  
2,15.696,rs7582948,0.121  
2,15.697,rs308003,0.121  
2,15.808,rs13413734,0.136  
2,15.883,rs954845,0.130  
2,16.021,rs1566982,0.133  
2,16.040,rs4669100,0.130  
2,16.062,rs905968,0.127  
2,16.120,rs1077583,0.145  
2,16.147,rs6431834,0.144  
2,16.191,rs2712032,0.131  
2,16.241,rs2197829,0.139  
2,16.432,rs3796115,0.118  
2,16.436,rs6431837,0.118  
2,16.534,rs771283,0.133  
2,16.601,rs771306,0.172  
2,16.684,rs771320,0.159  
2,16.699,rs4669122,0.160  
2,16.786,rs771268,0.168  
2,17.223,rs2352400,0.157  
2,17.416,rs930767,0.161  
2,17.481,rs7588701,0.149  
2,17.546,rs17672986,0.136  
2,17.791,rs6431869,0.139



2,17.981,rs6750297,0.123  
2,17.995,rs10179297,0.123  
2,18.174,rs13005109,0.132  
2,18.224,rs2028381,0.134  
2,18.369,rs1367272,0.151  
2,18.380,rs6732885,0.152  
2,18.433,rs732078,0.187  
2,18.718,rs6431885,0.270  
2,18.938,rs2049072,0.308  
2,19.223,rs11682611,0.294  
2,19.255,rs810067,0.291  
2,19.323,rs2948927,0.294  
2,19.417,rs772428,0.305  
2,19.781,rs7564066,0.310  
2,19.803,rs1861506,0.304  
2,19.939,rs11894196,0.299  
2,19.978,rs40996,0.290  
2,19.990,rs12468177,0.275  
2,19.998,rs6753101,0.260  
2,20.008,rs4669238,0.252  
2,20.078,rs16866569,0.237  
2,20.107,rs6728934,0.258  
2,20.390,rs4668562,0.269  
2,20.766,rs181136,0.294  
2,21.348,rs238630,0.235  
2,21.426,rs7595804,0.205  
2,21.546,rs3102937,0.165  
2,21.897,rs4669256,0.136  
2,22.061,rs901350,0.097  
2,22.126,rs1872603,0.068  
2,22.175,rs2630720,0.049  
2,22.223,rs2655455,0.066  
2,22.270,rs1504240,0.105  
2,22.479,rs10192647,0.105  
2,22.697,rs1532791,0.105  
2,22.742,rs3856451,0.093  
2,22.798,rs4669330,0.085  
2,22.984,rs13390283,0.073  
2,23.012,rs11894892,0.070  
2,23.311,rs12471187,0.040  
2,23.312,rs1109670,0.036  
2,23.312,rs13423661,0.057  
2,23.313,rs1467079,0.058  
2,23.314,rs12692379,0.043  
2,23.315,rs6431990,0.042  
2,23.315,rs12615983,0.041  
2,23.315,rs2136842,0.027  
2,23.316,rs6758205,0.027  
2,24.251,rs10179642,0.023  
2,24.753,rs3762535,0.021  
2,24.822,rs10929592,0.027  
2,24.835,rs884427,0.028  
2,24.933,rs7608996,0.032  
2,25.096,rs16867116,0.023  
2,25.098,rs9287712,0.023  
2,25.297,rs4668634,0.037  
2,25.467,rs4669444,0.041  
2,25.554,rs10200632,0.049  
2,25.561,rs4669453,0.064  
2,25.570,rs871820,0.053  
2,25.636,rs6739059,0.052

2,25.649,rs10929616,0.058  
2,25.663,rs7559852,0.067  
2,25.675,rs10803704,0.068  
2,25.718,rs7568330,0.065  
2,25.889,rs16867226,0.051  
2,25.973,rs4669507,0.041  
2,26.009,rs6708858,0.036  
2,26.101,rs6705493,0.040  
2,26.121,rs1469541,0.041  
2,26.155,rs6716186,0.043  
2,26.274,rs4233874,0.057  
2,26.321,rs11680378,0.052  
2,26.391,rs7585544,0.040  
2,26.430,rs2241113,0.040  
2,26.488,rs7593918,0.059  
2,26.593,rs6741014,0.098  
2,26.635,rs6432075,0.106  
2,26.649,rs1006866,0.109  
2,26.658,rs6432079,0.110  
2,26.658,rs16855996,0.110  
2,26.677,rs759341,0.112  
2,26.715,rs759343,0.106  
2,26.731,rs7556858,0.087  
2,26.735,rs16856070,0.087  
2,26.758,rs6432083,0.089  
2,26.777,rs4669564,0.087  
2,26.805,rs2357541,0.075  
2,26.886,rs1003652,0.068  
2,26.927,rs10197851,0.069  
2,26.968,rs11677361,0.068  
2,26.985,rs6755271,0.069  
2,27.002,rs13392890,0.075  
2,27.113,rs1974676,0.071  
2,27.135,rs11694911,0.071  
2,27.159,rs1405948,0.072  
2,27.228,rs818167,0.068  
2,27.241,rs2430424,0.069  
2,27.319,rs7609435,0.072  
2,27.332,rs10185605,0.073  
2,27.343,rs1405950,0.076  
2,27.369,rs1641147,0.082  
2,27.465,rs3732114,0.090  
2,27.764,rs11676727,0.085  
2,27.820,rs12468286,0.084  
2,27.876,rs4669621,0.079  
2,27.885,rs10929698,0.078  
2,27.988,rs4799,0.069  
2,28.051,rs2884289,0.065  
2,28.076,rs17365477,0.064  
2,28.112,rs1734389,0.058  
2,28.148,rs1734337,0.061  
2,28.158,rs1997523,0.061  
2,28.173,rs10178826,0.058  
2,28.191,rs1317981,0.054  
2,28.198,rs4669639,0.053  
2,28.222,rs1882646,0.053  
2,28.257,rs2091817,0.053  
2,28.304,rs1453084,0.053  
2,28.366,rs10199787,0.047  
2,28.401,rs6748518,0.024  
2,28.447,rs754798,0.022

2,28.523,rs10176051,0.032  
2,28.568,rs2357888,0.031  
2,28.608,rs16857117,0.030  
2,28.617,rs11892303,0.029  
2,28.629,rs6432168,0.029  
2,28.645,rs13019468,0.032  
2,28.715,rs6739182,0.045  
2,28.728,rs7608117,0.045  
2,29.211,rs4668723,0.080  
2,29.245,rs12466910,0.085  
2,29.347,rs11687681,0.069  
2,29.525,rs9287731,0.031  
2,29.616,rs6432212,0.024  
2,29.688,rs7578132,0.024  
2,29.812,rs11681838,0.024  
2,29.895,rs7584842,0.022  
2,29.965,rs6718783,0.021  
2,29.996,rs2304402,0.020  
2,30.099,rs11690767,0.025  
2,30.201,rs7567183,0.023  
2,30.458,rs7595221,0.042  
2,30.581,rs11690125,0.045  
2,30.654,rs1050800,0.034  
2,30.727,rs6735995,0.027  
2,30.728,rs10495585,0.027  
2,30.769,rs953071,0.053  
2,30.859,rs4296404,0.066  
2,30.947,rs2581084,0.077  
2,30.982,rs12468031,0.080  
2,31.103,rs2581053,0.093  
2,31.116,rs1530145,0.094  
2,31.127,rs1036668,0.095  
2,31.178,rs12618497,0.099  
2,31.298,rs17549909,0.105  
2,31.339,rs10495589,0.105  
2,31.423,rs6732455,0.103  
2,31.442,rs6738871,0.105  
2,31.495,rs10201732,0.109  
2,31.623,rs12617169,0.121  
2,31.805,rs7587168,0.135  
2,31.930,rs7567643,0.135  
2,31.936,rs10754960,0.135  
2,32.257,rs7563729,0.145  
2,32.412,rs10176670,0.116  
2,32.506,rs1547587,0.101  
2,32.584,rs7594033,0.101  
2,32.602,rs10169963,0.102  
2,32.699,rs11898082,0.133  
2,32.793,rs6432315,0.144  
2,32.864,rs939221,0.139  
2,33.034,rs10490550,0.107  
2,33.277,rs2113818,0.098  
2,33.339,rs13000767,0.099  
2,33.375,rs7557984,0.101  
2,33.580,rs779374,0.121  
2,33.640,rs1402545,0.119  
2,33.726,rs7567155,0.132  
2,33.730,rs1818595,0.133  
2,33.914,rs4669910,0.125  
2,34.033,rs2046266,0.120  
2,34.411,rs10495614,0.176

2,34.432,rs13022060,0.190  
2,34.465,rs494516,0.173  
2,34.472,rs10495633,0.191  
2,34.602,rs10170192,0.172  
2,34.648,rs2014149,0.174  
2,34.703,rs2865931,0.182  
2,34.746,rs11895101,0.212  
2,34.757,rs2049681,0.212  
2,34.768,rs4670006,0.212  
2,34.775,rs4668834,0.213  
2,34.809,rs2015245,0.209  
2,35.045,rs6432491,0.140  
2,35.053,rs7577131,0.139  
2,35.098,rs6740792,0.135  
2,35.234,rs1430805,0.125  
2,35.349,rs13391879,0.122  
2,35.571,rs1469017,0.118  
2,35.812,rs918359,0.104  
2,36.030,rs16862519,0.093  
2,36.550,rs13029846,0.075  
2,36.841,rs807624,0.056  
2,36.922,rs7579979,0.058  
2,36.956,rs11693212,0.062  
2,37.031,rs16862954,0.072  
2,37.041,rs6746441,0.072  
2,37.084,rs6431733,0.062  
2,37.184,rs6706165,0.042  
2,37.277,rs10185339,0.022  
2,37.282,rs2380680,0.022  
2,37.336,rs7595922,0.017  
2,37.508,rs2559069,0.004  
2,37.523,rs10495647,0.004  
2,37.733,rs6716344,0.001  
2,37.761,rs6735681,0.000  
2,37.798,rs9287666,0.000  
2,37.833,rs1365966,-0.000  
2,37.866,rs6735335,-0.001  
2,37.906,rs10194143,-0.000  
2,37.922,rs6727571,-0.001  
2,37.952,rs10186232,-0.001  
2,38.397,rs4047462,-0.003  
2,38.451,rs1567965,-0.003  
2,38.483,rs340724,-0.000  
2,38.555,rs7564195,0.000  
2,38.634,rs340749,0.000  
2,38.897,rs919432,0.001  
2,38.964,rs983249,0.001  
2,39.009,rs1430060,0.002  
2,39.426,rs7425164,0.025  
2,39.438,rs6723770,0.034  
2,39.441,rs10167880,0.028  
2,39.611,rs2111873,0.032  
2,39.617,rs534990,0.033  
2,39.623,rs2341997,0.033  
2,39.736,rs12615806,0.054  
2,39.766,rs10490431,0.054  
2,39.844,rs1515987,0.050  
2,39.896,rs1515972,0.046  
2,39.939,rs1546620,0.032  
2,39.991,rs1471342,0.031  
2,40.166,rs2732922,0.027

2,40.219,rs2345097,0.025  
2,40.307,rs4075511,0.034  
2,40.319,rs6759244,0.035  
2,40.403,rs2345102,0.043  
2,40.418,rs6738939,0.044  
2,40.561,rs2345505,0.045  
2,40.601,rs1377081,0.045  
2,40.949,rs1516903,0.053  
2,40.971,rs17389100,0.056  
2,41.015,rs16984751,0.059  
2,41.075,rs13026592,0.060  
2,41.094,rs3912722,0.052  
2,41.100,rs10168276,0.054  
2,41.101,rs7589253,0.068  
2,41.113,rs10174485,0.087  
2,41.117,rs16985153,0.091  
2,41.127,rs4119150,0.106  
2,41.134,rs16985176,0.134  
2,41.143,rs2272519,0.153  
2,41.144,rs4832602,0.153  
2,41.237,rs2881318,0.173  
2,41.286,rs10173922,0.189  
2,41.345,rs4240224,0.216  
2,41.380,rs7562720,0.228  
2,41.410,rs12990630,0.237  
2,41.460,rs16985823,0.253  
2,41.519,rs1574072,0.255  
2,41.538,rs4233760,0.255  
2,41.539,rs4233762,0.255  
2,41.553,rs4358083,0.264  
2,41.574,rs12105891,0.257  
2,41.663,rs10209041,0.229  
2,41.672,rs703316,0.224  
2,41.706,rs851066,0.211  
2,41.755,rs703297,0.198  
2,41.781,rs824466,0.224  
2,41.790,rs824498,0.201  
2,41.807,rs4666489,0.203  
2,41.810,rs824446,0.204  
2,41.815,rs6705213,0.229  
2,41.877,rs6757410,0.253  
2,41.904,rs17686199,0.254  
2,41.911,rs1820584,0.253  
2,42.206,rs6531191,0.232  
2,42.295,rs6733236,0.244  
2,42.528,rs7601531,0.252  
2,42.634,rs10495699,0.256  
2,42.840,rs10184780,0.243  
2,43.569,rs907865,0.368  
2,43.587,rs10170811,0.373  
2,43.676,rs7607854,0.425  
2,43.747,rs10856796,0.467  
2,43.771,rs6749689,0.481  
2,43.784,rs3771254,0.481  
2,43.836,rs1043419,0.482  
2,44.046,rs6710671,0.489  
2,44.106,rs12467895,0.563  
2,44.119,rs11898154,0.569  
2,44.145,rs4666412,0.547  
2,44.157,rs342076,0.536  
2,44.162,rs342138,0.534

2,44.187,rs2289084,0.522  
2,44.205,rs6728591,0.517  
2,44.215,rs2082873,0.526  
2,44.225,rs6717824,0.500  
2,44.230,rs16987836,0.500  
2,44.264,rs921599,0.481  
2,44.311,rs934601,0.430  
2,44.322,rs11680086,0.410  
2,44.331,rs2304423,0.395  
2,44.354,rs1013363,0.391  
2,44.370,rs746776,0.378  
2,44.371,rs11678116,0.378  
2,44.373,rs7255,0.377  
2,44.390,rs340600,0.395  
2,44.445,rs564125,0.381  
2,44.583,rs6709100,0.369  
2,44.602,rs7571978,0.368  
2,44.633,rs1002755,0.374  
2,44.701,rs4533439,0.388  
2,44.758,rs4665639,0.365  
2,44.759,rs7558478,0.364  
2,44.814,rs693,0.335  
2,44.891,rs571468,0.295  
2,44.906,rs11886946,0.297  
2,45.099,rs13398007,0.327  
2,45.114,rs870638,0.356  
2,45.156,rs6739502,0.277  
2,45.206,rs219555,0.283  
2,45.309,rs6749957,0.260  
2,45.318,rs890081,0.260  
2,45.511,rs6547818,0.255  
2,45.555,rs1901346,0.253  
2,45.564,rs7568769,0.252  
2,45.742,rs4666291,0.229  
2,45.916,rs328539,0.184  
2,46.019,rs2176472,0.165  
2,46.037,rs1607267,0.164  
2,46.087,rs11904182,0.147  
2,46.110,rs8179610,0.141  
2,46.134,rs7425479,0.145  
2,46.207,rs1396725,0.159  
2,46.340,rs4299360,0.178  
2,46.496,rs3924202,0.194  
2,46.632,rs2001427,0.179  
2,46.666,rs7566648,0.175  
2,46.675,rs17321444,0.174  
2,46.748,rs10189050,0.170  
2,46.931,rs2681017,0.149  
2,46.977,rs7572707,0.146  
2,47.105,rs2592762,0.137  
2,47.127,rs6718240,0.134  
2,47.130,rs2592759,0.134  
2,47.142,rs10495737,0.135  
2,47.201,rs4143808,0.140  
2,47.278,rs7557676,0.133  
2,47.293,rs6734383,0.132  
2,47.430,rs896020,0.123  
2,47.626,rs12478810,0.126  
2,47.632,rs7587361,0.127  
2,47.693,rs2577710,0.128  
2,47.712,rs875077,0.148

2,47.712,rs2723129,0.148  
2,47.779,rs1530045,0.155  
2,47.786,rs6742202,0.162  
2,47.788,rs1653763,0.153  
2,47.796,rs748860,0.120  
2,47.800,rs1653786,0.136  
2,47.801,rs4665609,0.134  
2,47.804,rs1709339,0.133  
2,47.824,rs543012,0.104  
2,47.841,rs17045819,0.093  
2,47.931,rs11902184,0.045  
2,47.946,rs10865262,0.041  
2,47.975,rs7589373,0.067  
2,47.980,rs10208038,0.082  
2,47.983,rs713587,0.112  
2,47.983,rs17046751,0.100  
2,47.988,rs10189702,0.095  
2,47.990,rs2304429,0.091  
2,48.022,rs7594432,0.103  
2,48.033,rs11683424,0.100  
2,48.074,rs12999687,0.072  
2,48.209,rs10196664,0.080  
2,48.224,rs730072,0.066  
2,48.325,rs2292225,0.048  
2,48.326,rs7583475,0.048  
2,48.413,rs6751254,0.032  
2,48.453,rs9309386,0.028  
2,48.476,rs499728,0.029  
2,48.592,rs11126114,0.030  
2,48.698,rs858648,0.030  
2,48.784,rs12713638,0.041  
2,48.841,rs890682,0.039  
2,48.955,rs11685550,0.037  
2,49.325,rs12990137,0.029  
2,49.470,rs1025542,0.020  
2,49.646,rs10211527,0.014  
2,49.662,rs2272071,0.014  
2,49.683,rs13004993,0.014  
2,49.716,rs7592534,0.013  
2,49.760,rs4665871,0.011  
2,49.829,rs2280513,0.007  
2,49.961,rs1009221,0.005  
2,50.029,rs2384463,0.000  
2,50.435,rs1275513,0.001  
2,50.488,rs13408493,0.002  
2,50.652,rs11692692,0.004  
2,50.843,rs13409819,0.004  
2,50.910,rs7349418,0.000  
2,50.940,rs7567409,-0.000  
2,51.009,rs4358081,-0.026  
2,51.311,rs6739684,-0.040  
2,51.366,rs7577483,-0.046  
2,51.389,rs1562392,-0.048  
2,51.439,rs7568662,-0.056  
2,51.483,rs12619049,-0.056  
2,51.489,rs6744522,-0.057  
2,51.502,rs1104869,-0.059  
2,51.504,rs4666183,-0.059  
2,51.803,rs4146673,-0.060  
2,51.836,rs1534544,-0.059  
2,51.891,rs7591913,-0.057

2,51.903,rs7590571,-0.057  
2,52.032,rs4346337,-0.049  
2,52.230,rs4666243,-0.041  
2,52.249,rs7567732,-0.041  
2,52.297,rs6547949,-0.041  
2,52.306,rs13014477,-0.041  
2,52.322,rs6757945,-0.041  
2,52.334,rs4381747,-0.041  
2,52.345,rs4630725,-0.040  
2,52.473,rs2339540,-0.041  
2,52.600,rs6547972,-0.037  
2,52.836,rs2339475,-0.029  
2,52.846,rs10495770,-0.028  
2,52.866,rs6709517,-0.027  
2,52.944,rs4265970,-0.039  
2,53.020,rs7574859,-0.045  
2,53.128,rs10201541,-0.049  
2,53.175,rs6718327,-0.051  
2,53.269,rs2361743,-0.057  
2,53.300,rs6723731,-0.059  
2,53.327,rs10203090,-0.062  
2,53.340,rs10165223,-0.062  
2,53.497,rs1345151,-0.061  
2,53.557,rs966498,-0.067  
2,53.578,rs4334534,-0.081  
2,53.600,rs6718106,-0.081  
2,53.628,rs2362540,-0.070  
2,53.672,rs2362541,-0.063  
2,53.777,rs13014895,-0.043  
2,53.792,rs4563275,-0.038  
2,53.840,rs6740257,-0.033  
2,53.891,rs7583194,-0.025  
2,53.940,rs2076932,-0.024  
2,53.967,rs13391574,-0.029  
2,54.318,rs4952002,-0.051  
2,54.391,rs2593477,-0.065  
2,54.437,rs472161,-0.065  
2,54.493,rs1715819,-0.066  
2,54.515,rs2926304,-0.054  
2,54.520,rs6739240,-0.052  
2,54.530,rs551356,-0.048  
2,54.548,rs17396800,-0.059  
2,54.662,rs2364430,-0.053  
2,54.689,rs2194452,-0.054  
2,54.732,rs1559497,-0.057  
2,54.843,rs2303325,-0.062  
2,54.885,rs4952017,-0.058  
2,54.954,rs6543594,-0.068  
2,55.013,rs11681174,-0.068  
2,55.064,rs4951964,-0.071  
2,55.119,rs11888670,-0.081  
2,55.147,rs2194463,-0.094  
2,55.213,rs7560152,-0.128  
2,55.275,rs12992405,-0.104  
2,55.327,rs11681503,-0.072  
2,55.343,rs4952069,-0.071  
2,55.348,rs13386968,-0.067  
2,55.358,rs601255,-0.059  
2,55.361,rs605832,-0.046  
2,55.369,rs1540926,-0.035  
2,55.387,rs6543624,-0.024



2,55.390,rs11896460,-0.022  
2,55.395,rs4276068,-0.019  
2,55.400,rs1560268,-0.017  
2,55.403,rs207423,-0.016  
2,55.406,rs932559,-0.016  
2,55.410,rs207444,-0.016  
2,55.477,rs2365778,-0.017  
2,55.648,rs7559329,-0.013  
2,55.974,rs9308929,-0.022  
2,55.982,rs7570685,-0.022  
2,56.003,rs4952315,-0.019  
2,56.008,rs6728021,-0.019  
2,56.008,rs7607940,-0.019  
2,56.056,rs4952280,-0.017  
2,56.086,rs219206,-0.018  
2,56.093,rs3769554,-0.019  
2,56.108,rs10490453,-0.020  
2,56.255,rs218197,-0.033  
2,56.279,rs6705263,-0.033  
2,56.367,rs6712473,-0.032  
2,56.515,rs3754829,-0.046  
2,56.588,rs723042,-0.046  
2,56.681,rs7566302,-0.048  
2,56.701,rs6742198,-0.036  
2,56.717,rs6757228,-0.028  
2,56.730,rs2034693,-0.025  
2,56.782,rs4092337,-0.022  
2,56.800,rs604788,-0.021  
2,56.807,rs654291,-0.011  
2,56.832,rs6543714,-0.013  
2,56.867,rs2367735,-0.015  
2,56.869,rs4670574,-0.015  
2,56.870,rs6543716,-0.008  
2,56.880,rs17013129,-0.003  
2,56.889,rs7561821,-0.002  
2,56.962,rs11685011,-0.005  
2,56.987,rs4258776,-0.006  
2,57.040,rs13388224,-0.005  
2,57.167,rs13386750,-0.003  
2,57.247,rs7585514,-0.001  
2,57.257,rs7574123,-0.001  
2,57.289,rs2367957,-0.001  
2,57.360,rs17338700,-0.000  
2,57.375,rs6714970,-0.000  
2,57.384,rs6735386,-0.000  
2,57.424,rs6738183,-0.000  
2,57.430,rs7572718,-0.002  
2,57.619,rs1718718,-0.002  
2,57.704,rs13410163,-0.004  
2,57.718,rs1559644,-0.004  
2,57.790,rs9284729,-0.003  
2,57.819,rs13033324,-0.002  
2,57.851,rs745007,-0.004  
2,57.883,rs6750420,-0.001  
2,57.906,rs2059443,-0.001  
2,57.930,rs10495810,-0.000  
2,57.956,rs1364690,-0.000  
2,58.119,rs10177156,0.001  
2,58.222,rs13005810,0.000  
2,58.238,rs10204349,0.000  
2,58.323,rs892458,0.000

2,58.431,rs11124380,0.002  
2,58.472,rs3845770,0.006  
2,58.494,rs1220211,0.005  
2,58.510,rs10203553,0.006  
2,58.581,rs9917264,0.006  
2,58.604,rs1527616,0.003  
2,58.608,rs11683103,0.003  
2,58.643,rs6543865,0.003  
2,58.649,rs3115248,0.003  
2,58.684,rs3108124,0.002  
2,58.699,rs4471866,0.002  
2,58.817,rs280754,0.001  
2,58.853,rs280768,0.001  
2,58.935,rs6760654,0.001  
2,59.050,rs12712411,0.002  
2,59.207,rs13403909,0.010  
2,59.418,rs7590663,0.011  
2,59.434,rs4624361,0.013  
2,59.523,rs4560089,0.010  
2,59.558,rs11679130,0.008  
2,59.733,rs7578143,0.001  
2,59.737,rs925910,0.001  
2,59.815,rs6711702,-0.004  
2,59.862,rs833760,-0.013  
2,59.889,rs2634806,-0.019  
2,59.893,rs1397443,-0.019  
2,59.897,rs1510728,-0.019  
2,59.942,rs305175,-0.010  
2,59.957,rs1167463,-0.022  
2,59.969,rs1167436,-0.024  
2,60.093,rs2699187,-0.036  
2,60.100,rs12712488,-0.035  
2,60.204,rs17407386,-0.022  
2,60.211,rs7569878,-0.021  
2,60.223,rs7608543,-0.019  
2,60.242,rs7584784,-0.018  
2,60.385,rs4670551,-0.013  
2,60.462,rs3770911,-0.006  
2,60.515,rs848504,-0.006  
2,60.603,rs3755206,-0.003  
2,60.674,rs6720433,-0.002  
2,60.917,rs848642,-0.000  
2,61.093,rs918066,-0.003  
2,61.127,rs12612163,-0.004  
2,61.233,rs759433,-0.006  
2,61.261,rs6732843,-0.007  
2,61.377,rs10182004,-0.011  
2,61.377,rs13029062,-0.012  
2,61.378,rs1990640,-0.007  
2,61.381,rs11691187,-0.009  
2,61.386,rs6744274,-0.007  
2,61.392,rs4670166,-0.005  
2,61.410,rs10207138,-0.005  
2,61.504,rs2252032,-0.012  
2,61.606,rs1007823,-0.012  
2,61.709,rs4648202,-0.013  
2,61.780,rs10206380,-0.014  
2,61.887,rs2373000,-0.013  
2,61.920,rs6544074,-0.011  
2,61.993,rs6544086,-0.000  
2,61.998,rs10199137,-0.000

2,62.146,rs6544093,0.000  
2,62.303,rs2058403,0.002  
2,62.425,rs13401336,0.003  
2,62.485,rs2373292,0.002  
2,62.500,rs10207574,0.002  
2,62.649,rs3845787,0.000  
2,62.673,rs12471294,0.002  
2,62.747,rs6748492,0.002  
2,62.840,rs7562836,0.002  
2,62.881,rs867574,0.001  
2,62.891,rs6727303,0.000  
2,62.899,rs2373305,-0.000  
2,62.916,rs6738882,-0.000  
2,62.983,rs766231,-0.000  
2,63.259,rs10181021,-0.001  
2,63.508,rs400681,-0.008  
2,63.556,rs7608905,-0.016  
2,63.564,rs3911040,-0.026  
2,63.589,rs4670858,-0.028  
2,63.596,rs1152,-0.028  
2,63.664,rs10198160,-0.027  
2,63.691,rs7568053,-0.031  
2,63.711,rs1368112,-0.039  
2,63.758,rs17421154,-0.047  
2,63.798,rs12328034,-0.047  
2,63.841,rs453182,-0.046  
2,63.853,rs7578356,-0.051  
2,63.864,rs17023025,-0.056  
2,63.867,rs6733848,-0.057  
2,63.880,rs6751481,-0.063  
2,63.923,rs7603676,-0.062  
2,64.024,rs3112165,-0.052  
2,64.465,rs7577097,-0.028  
2,64.509,rs10210842,-0.026  
2,64.530,rs6712583,-0.026  
2,64.657,rs2110658,-0.029  
2,64.674,rs2716726,-0.031  
2,64.699,rs6722610,-0.031  
2,64.768,rs9679549,-0.031  
2,64.771,rs1541564,-0.031  
2,64.836,rs11124710,-0.054  
2,64.847,rs720796,-0.042  
2,64.922,rs11891674,-0.058  
2,64.958,rs4952441,-0.068  
2,64.963,rs12619775,-0.068  
2,65.006,rs2192919,-0.073  
2,65.026,rs373857,-0.077  
2,65.078,rs381797,-0.099  
2,65.088,rs17025732,-0.104  
2,65.110,rs10210665,-0.121  
2,65.114,rs2110743,-0.124  
2,65.133,rs11890040,-0.136  
2,65.134,rs12712691,-0.137  
2,65.173,rs13414307,-0.156  
2,65.210,rs4952630,-0.157  
2,65.243,rs7561779,-0.159  
2,65.246,rs9309056,-0.159  
2,65.267,rs42822,-0.152  
2,65.331,rs2888698,-0.138  
2,65.413,rs17026752,-0.133  
2,65.561,rs7562658,-0.124

2,65.573,rs9309065,-0.090  
2,65.626,rs17027360,-0.057  
2,65.627,rs1441234,-0.057  
2,65.656,rs12712748,-0.054  
2,65.922,rs7603075,-0.071  
2,66.072,rs17028447,-0.061  
2,66.121,rs7563359,-0.064  
2,66.163,rs4381822,-0.061  
2,66.184,rs7599875,-0.060  
2,66.192,rs17028747,-0.059  
2,66.195,rs4414724,-0.059  
2,66.300,rs4952521,-0.028  
2,66.312,rs4632397,-0.028  
2,66.340,rs7601644,-0.028  
2,66.409,rs4952548,-0.021  
2,66.478,rs12617564,-0.024  
2,66.560,rs11898187,-0.030  
2,66.595,rs6737623,-0.036  
2,66.607,rs6748687,-0.038  
2,66.651,rs7570219,-0.046  
2,66.697,rs4453730,-0.035  
2,66.857,rs2302346,-0.057  
2,66.971,rs10495897,-0.055  
2,67.306,rs6717144,-0.079  
2,67.506,rs6732045,-0.107  
2,67.623,rs13020622,-0.107  
2,67.624,rs3842996,-0.108  
2,67.669,rs13429058,-0.109  
2,67.673,rs2166500,-0.109  
2,67.808,rs11686640,-0.077  
2,67.819,rs2166503,-0.075  
2,67.823,rs4953713,-0.091  
2,67.846,rs10175942,-0.095  
2,67.936,rs2374482,-0.090  
2,67.965,rs1446571,-0.067  
2,67.995,rs4952967,-0.050  
2,68.090,rs2374525,-0.028  
2,68.206,rs13002812,-0.014  
2,68.314,rs13026309,-0.005  
2,68.329,rs11900952,-0.005  
2,68.404,rs3901678,-0.003  
2,68.495,rs6724325,-0.000  
2,68.585,rs6716551,0.000  
2,68.709,rs1368087,0.001  
2,68.902,rs4245786,0.002  
2,68.963,rs4952689,0.001  
2,68.964,rs4953028,0.001  
2,68.967,rs6544718,0.001  
2,69.019,rs4953037,0.001  
2,69.174,rs7565864,0.001  
2,69.218,rs4953063,0.000  
2,69.263,rs7593878,0.000  
2,69.276,rs12465678,0.000  
2,69.465,rs7580016,0.001  
2,69.854,rs1437747,0.002  
2,69.877,rs473449,0.002  
2,69.906,rs343974,0.002  
2,70.045,rs4953133,0.002  
2,70.085,rs341605,0.003  
2,70.121,rs11674185,0.005  
2,70.134,rs737448,0.005

2,70.209,rs2673270,0.010  
2,70.229,rs1983312,0.017  
2,70.301,rs2959265,0.021  
2,70.307,rs17032940,0.021  
2,70.312,rs13005516,0.021  
2,70.328,rs1447107,0.023  
2,70.338,rs13410828,0.021  
2,70.344,rs4355165,0.020  
2,70.357,rs12618367,0.016  
2,70.373,rs2959232,0.015  
2,70.382,rs908571,0.014  
2,70.406,rs12464646,0.009  
2,70.411,rs11896942,0.008  
2,70.415,rs1517024,0.008  
2,70.415,rs6707629,0.007  
2,70.465,rs1356339,0.001  
2,70.466,rs12712937,0.001  
2,70.482,rs3914642,0.000  
2,70.486,rs6720296,0.000  
2,70.490,rs2342702,0.000  
2,70.504,rs10196185,0.000  
2,70.512,rs2343408,-0.000  
2,70.536,rs3908093,-0.003  
2,70.543,rs883834,-0.003  
2,70.577,rs929902,-0.002  
2,70.592,rs7605521,-0.001  
2,70.628,rs883413,-0.000  
2,70.644,rs7575803,0.002  
2,70.683,rs11689571,-0.000  
2,71.088,rs3770283,-0.007  
2,71.372,rs7599740,-0.013  
2,71.449,rs1589039,-0.007  
2,71.612,rs506134,-0.009  
2,71.644,rs6746467,-0.008  
2,71.702,rs952331,-0.007  
2,71.719,rs4953245,-0.011  
2,71.726,rs940052,-0.008  
2,71.727,rs6716622,-0.008  
2,71.739,rs7582320,-0.002  
2,71.772,rs4264601,-0.003  
2,71.783,rs7558342,-0.009  
2,71.797,rs6720975,-0.004  
2,71.824,rs4953262,-0.003  
2,71.832,rs7596891,-0.006  
2,71.838,rs11125034,-0.013  
2,71.839,rs7559522,-0.013  
2,71.883,rs6756452,-0.014  
2,71.917,rs1966813,-0.016  
2,71.921,rs2122110,-0.017  
2,72.066,rs7578578,-0.039  
2,72.079,rs2711299,-0.039  
2,72.135,rs4953292,-0.030  
2,72.141,rs7607360,-0.029  
2,72.203,rs2245633,-0.031  
2,72.398,rs13405039,-0.026  
2,72.409,rs6742737,-0.026  
2,72.435,rs12467673,-0.026  
2,72.474,rs3768757,-0.027  
2,72.478,rs3754573,-0.027  
2,72.585,rs3754568,-0.019  
2,72.636,rs3820729,-0.017

2,72.652,rs281476,-0.017  
2,72.671,rs281489,-0.018  
2,72.671,rs882586,-0.018  
2,72.703,rs4953334,-0.038  
2,72.708,rs4337520,-0.039  
2,72.716,rs11688133,-0.040  
2,72.716,rs13027413,-0.040  
2,72.724,rs2881321,-0.040  
2,72.726,rs7589968,-0.039  
2,72.736,rs12617123,-0.035  
2,72.742,rs1000531,-0.035  
2,72.761,rs2121266,-0.030  
2,72.767,rs7571879,-0.029  
2,72.771,rs6720535,-0.028  
2,72.780,rs6758592,-0.026  
2,72.840,rs17035106,-0.021  
2,72.932,rs896210,-0.016  
2,73.046,rs4953408,-0.021  
2,73.145,rs11125091,-0.053  
2,73.154,rs7577004,-0.055  
2,73.182,rs1374274,-0.052  
2,73.200,rs6713911,-0.045  
2,73.207,rs9225,-0.044  
2,73.218,rs7586009,-0.038  
2,73.256,rs3087857,-0.031  
2,73.335,rs2163982,-0.021  
2,73.341,rs6713052,-0.020  
2,73.392,rs1474396,-0.043  
2,73.395,rs3739098,-0.045  
2,73.425,rs7596776,-0.080  
2,73.501,rs904166,-0.073  
2,73.532,rs13002829,-0.069  
2,73.551,rs904162,-0.066  
2,73.559,rs10206550,-0.065  
2,73.561,rs10168995,-0.064  
2,73.574,rs4245814,-0.056  
2,73.596,rs10865224,-0.045  
2,73.600,rs13388259,-0.044  
2,73.625,rs1126497,-0.053  
2,73.722,rs17036636,-0.050  
2,73.772,rs6752504,-0.044  
2,73.778,rs11125144,-0.049  
2,73.781,rs4953503,-0.052  
2,73.793,rs6744530,-0.062  
2,73.810,rs4953514,-0.065  
2,73.833,rs7559733,-0.083  
2,73.851,rs6742794,-0.095  
2,73.869,rs9309149,-0.117  
2,73.878,rs9789343,-0.117  
2,73.900,rs2348238,-0.123  
2,73.906,rs797703,-0.124  
2,73.934,rs441327,-0.124  
2,74.259,rs7570354,-0.173  
2,74.346,rs2471403,-0.167  
2,74.528,rs4561709,-0.205  
2,74.533,rs10185212,-0.206  
2,74.604,rs3792234,-0.214  
2,74.615,rs2140551,-0.240  
2,74.697,rs1404057,-0.217  
2,74.709,rs7579411,-0.217  
2,74.730,rs4131885,-0.224

2,74.765,rs7574612,-0.228  
2,74.768,rs4256003,-0.255  
2,74.801,rs4482537,-0.258  
2,74.851,rs10490126,-0.281  
2,74.857,rs7579295,-0.285  
2,74.858,rs17037747,-0.285  
2,74.862,rs4953640,-0.289  
2,74.870,rs1024779,-0.299  
2,74.897,rs6706144,-0.331  
2,74.901,rs17500266,-0.336  
2,74.920,rs12713027,-0.351  
2,75.060,rs1504179,-0.391  
2,75.100,rs12713042,-0.334  
2,75.212,rs7557485,-0.383  
2,75.283,rs1405959,-0.427  
2,75.399,rs1995172,-0.423  
2,75.458,rs7564547,-0.418  
2,75.561,rs1518823,-0.409  
2,75.567,rs870168,-0.410  
2,75.595,rs7586200,-0.417  
2,75.618,rs925931,-0.423  
2,75.671,rs1156742,-0.475  
2,75.722,rs17491881,-0.496  
2,75.751,rs13417424,-0.498  
2,75.815,rs4971552,-0.503  
2,75.946,rs1715970,-0.510  
2,76.075,rs9678669,-0.552  
2,76.123,rs7590358,-0.564  
2,76.154,rs6706713,-0.574  
2,76.178,rs7581256,-0.541  
2,76.226,rs10177104,-0.509  
2,76.230,rs2351767,-0.465  
2,76.250,rs17040897,-0.501  
2,76.269,rs13391995,-0.538  
2,76.271,rs2194385,-0.542  
2,76.279,rs2048979,-0.543  
2,76.285,rs719645,-0.535  
2,76.356,rs10202039,-0.583  
2,76.391,rs9309199,-0.608  
2,76.444,rs2193225,-0.618  
2,76.550,rs12616790,-0.620  
2,76.598,rs988982,-0.621  
2,76.629,rs735315,-0.621  
2,76.765,rs1115763,-0.591  
2,76.782,rs10490145,-0.587  
2,76.829,rs6717556,-0.584  
2,76.958,rs9789477,-0.549  
2,76.984,rs12612083,-0.546  
2,77.036,rs12478948,-0.586  
2,77.037,rs17862718,-0.586  
2,77.166,rs1516191,-0.562  
2,77.246,rs3850342,-0.568  
2,77.252,rs10207610,-0.571  
2,77.349,rs892911,-0.617  
2,77.382,rs11125398,-0.632  
2,77.395,rs6545251,-0.643  
2,77.463,rs10181636,-0.701  
2,77.533,rs2103389,-0.734  
2,77.576,rs17042637,-0.769  
2,77.597,rs2178649,-0.785  
2,77.606,rs2141844,-0.791

2,77.619,rs12621157,-0.804  
2,77.650,rs2727892,-0.812  
2,77.652,rs12464727,-0.811  
2,77.733,rs7586951,-0.823  
2,77.817,rs11125431,-0.862  
2,77.913,rs4672216,-0.909  
2,77.945,rs17043190,-0.922  
2,77.999,rs1823887,-0.944  
2,78.115,rs17043720,-0.958  
2,78.168,rs7602023,-0.951  
2,78.186,rs6756739,-0.948  
2,78.305,rs1424969,-1.055  
2,78.319,rs17044122,-1.063  
2,78.332,rs2034254,-1.083  
2,78.335,rs17189210,-1.089  
2,78.355,rs13021753,-1.163  
2,78.399,rs6756317,-1.363  
2,78.418,rs4671212,-1.443  
2,78.492,rs4557020,-1.450  
2,78.657,rs6717369,-1.332  
2,78.781,rs11674173,-1.297  
2,78.811,rs11677058,-1.289  
2,78.941,rs7601625,-1.308  
2,78.980,rs2920881,-1.306  
2,79.016,rs10496038,-1.308  
2,79.070,rs14026,-1.315  
2,79.128,rs17432234,-1.325  
2,79.165,rs1047948,-1.331  
2,79.449,rs2586949,-1.388  
2,79.464,rs7594497,-1.389  
2,79.475,rs782606,-1.389  
2,79.545,rs7568378,-1.360  
2,79.580,rs10496053,-1.346  
2,79.604,rs4672074,-1.335  
2,79.743,rs6545534,-1.395  
2,79.784,rs13418952,-1.422  
2,79.872,rs929689,-1.472  
2,79.894,rs6545554,-1.475  
2,79.907,rs4672095,-1.415  
2,79.927,rs6728383,-1.435  
2,79.938,rs2869526,-1.446  
2,79.942,rs2216325,-1.443  
2,79.961,rs17047655,-1.440  
2,79.976,rs759615,-1.437  
2,80.037,rs12616518,-1.436  
2,80.060,rs2193481,-1.435  
2,80.071,rs6714635,-1.436  
2,80.082,rs13423780,-1.433  
2,80.095,rs10191130,-1.429  
2,80.107,rs17047897,-1.426  
2,80.208,rs6718973,-1.398  
2,80.466,rs7600489,-1.453  
2,80.586,rs17048563,-1.481  
2,80.655,rs1116357,-1.493  
2,80.912,rs11125711,-1.513  
2,80.965,rs6743780,-1.497  
2,80.991,rs2203805,-1.498  
2,81.231,rs1405824,-1.531  
2,81.253,rs1405826,-1.529  
2,81.360,rs11125728,-1.522  
2,81.366,rs10496077,-1.514



2,81.374,rs10180540,-1.573  
2,81.398,rs6722461,-1.532  
2,81.696,rs1851140,-1.442  
2,81.762,rs12986742,-1.496  
2,82.005,rs10182324,-1.526  
2,82.194,rs2192692,-1.519  
2,82.228,rs6758100,-1.425  
2,82.330,rs10490100,-1.228  
2,82.376,rs2192567,-1.126  
2,82.385,rs1990558,-1.105  
2,82.387,rs5008666,-1.100  
2,82.399,rs4325734,-1.091  
2,82.410,rs12622464,-1.082  
2,82.451,rs4432437,-1.047  
2,82.485,rs12464531,-0.977  
2,82.539,rs6740378,-1.013  
2,82.544,rs1035102,-1.012  
2,82.546,rs2539669,-1.011  
2,82.551,rs6545742,-1.006  
2,82.561,rs6545745,-0.989  
2,82.655,rs11125812,-0.839  
2,82.670,rs1019264,-0.829  
2,82.671,rs722889,-0.828  
2,82.711,rs2419402,-0.796  
2,82.727,rs17400093,-0.792  
2,82.759,rs17050495,-0.783  
2,82.932,rs7607085,-0.736  
2,82.989,rs1861151,-0.722  
2,83.382,rs907574,-0.683  
2,83.400,rs7597268,-0.698  
2,83.416,rs7567242,-0.702  
2,83.430,rs243083,-0.709  
2,83.446,rs4672388,-0.654  
2,83.534,rs13028240,-0.622  
2,83.566,rs10184550,-0.610  
2,83.575,rs1896297,-0.611  
2,83.635,rs356982,-0.586  
2,83.705,rs842767,-0.570  
2,83.724,rs881952,-0.543  
2,83.746,rs10198826,-0.515  
2,83.803,rs7576218,-0.511  
2,83.894,rs6545832,-0.516  
2,83.981,rs1534648,-0.544  
2,84.356,rs3943540,-0.435  
2,84.389,rs6719628,-0.436  
2,84.427,rs6714411,-0.436  
2,84.429,rs4672482,-0.436  
2,84.458,rs7584792,-0.438  
2,84.627,rs6742894,-0.397  
2,84.671,rs4350731,-0.337  
2,84.671,rs11686508,-0.344  
2,84.672,rs6545946,-0.359  
2,84.674,rs4608500,-0.397  
2,84.676,rs1527966,-0.395  
2,84.681,rs360791,-0.391  
2,84.759,rs11125954,-0.375  
2,84.821,rs6546024,-0.428  
2,84.872,rs329483,-0.470  
2,84.874,rs2917793,-0.438  
2,84.875,rs17028375,-0.441  
2,84.890,rs2217968,-0.512

2,84.893,rs11125993,-0.524  
2,84.974,rs2433384,-0.567  
2,85.306,rs1346236,-0.561  
2,85.334,rs10496112,-0.559  
2,85.384,rs11685822,-0.575  
2,85.398,rs13391261,-0.590  
2,85.482,rs6546073,-0.673  
2,85.538,rs13002043,-0.667  
2,85.685,rs17700924,-0.693  
2,85.888,rs6546095,-0.725  
2,86.092,rs702874,-0.753  
2,86.097,rs10469881,-0.755  
2,86.099,rs929698,-0.756  
2,86.103,rs6704589,-0.759  
2,86.238,rs13026295,-0.875  
2,86.248,rs7573247,-0.952  
2,86.259,rs4296412,-0.977  
2,86.274,rs17029538,-1.016  
2,86.276,rs9678117,-0.970  
2,86.293,rs918197,-0.976  
2,86.336,rs4313965,-0.981  
2,86.369,rs4671629,-0.952  
2,86.441,rs4671635,-0.954  
2,86.503,rs6546118,-0.943  
2,86.521,rs1541580,-0.932  
2,86.630,rs1009360,-0.834  
2,86.866,rs11681377,-0.807  
2,87.058,rs268866,-0.761  
2,87.196,rs6743585,-0.657  
2,87.305,rs1194849,-0.625  
2,87.537,rs10451656,-0.585  
2,87.540,rs840947,-0.595  
2,87.554,rs10203913,-0.632  
2,87.555,rs2917816,-0.631  
2,87.631,rs3911862,-0.585  
2,87.704,rs1673443,-0.663  
2,87.724,rs13424150,-0.674  
2,87.743,rs1673459,-0.684  
2,87.847,rs1544694,-0.725  
2,87.848,rs11891634,-0.728  
2,87.848,rs17030670,-0.733  
2,87.855,rs2111464,-0.773  
2,87.877,rs3845820,-0.788  
2,87.881,rs4671140,-0.791  
2,87.944,rs3919602,-0.738  
2,87.963,rs3845821,-0.700  
2,87.992,rs2631669,-0.649  
2,88.087,rs2627857,-0.651  
2,88.100,rs984578,-0.683  
2,88.114,rs4671716,-0.672  
2,88.128,rs7600569,-0.667  
2,88.139,rs2951282,-0.679  
2,88.159,rs10196975,-0.650  
2,88.197,rs4075737,-0.678  
2,88.199,rs4671723,-0.678  
2,88.205,rs4414666,-0.678  
2,89.126,rs6716792,-0.751  
2,89.131,rs6727352,-0.752  
2,89.148,rs6722685,-0.725  
2,89.161,rs3890755,-0.722  
2,89.174,rs9789535,-0.731

2,89.181,rs2300477,-0.719  
2,89.197,rs10184250,-0.707  
2,89.204,rs6706382,-0.680  
2,89.211,rs2192963,-0.675  
2,89.240,rs6725996,-0.646  
2,89.248,rs1548900,-0.645  
2,89.327,rs6727258,-0.651  
2,89.385,rs12993985,-0.651  
2,89.386,rs7579521,-0.651  
2,89.467,rs13405122,-0.618  
2,89.658,rs4671784,-0.572  
2,89.699,rs10180549,-0.577  
2,89.784,rs1921266,-0.637  
2,89.802,rs1384741,-0.687  
2,89.868,rs6754571,-0.692  
2,89.925,rs9941589,-0.697  
2,90.324,rs658602,-0.641  
2,90.370,rs6760732,-0.668  
2,90.418,rs17033681,-0.740  
2,90.555,rs2861638,-0.756  
2,90.710,rs2861683,-0.778  
2,90.797,rs7572685,-0.784  
2,90.849,rs4671821,-0.746  
2,90.875,rs2861709,-0.750  
2,91.036,rs10519126,-0.817  
2,91.116,rs12713604,-0.863  
2,91.165,rs1430778,-0.888  
2,91.203,rs10469954,-0.926  
2,91.208,rs4308115,-0.927  
2,91.226,rs6715551,-0.897  
2,91.236,rs17034538,-0.868  
2,91.269,rs13014970,-0.833  
2,91.289,rs1032807,-0.823  
2,91.307,rs905487,-0.874  
2,91.346,rs17034835,-0.849  
2,91.357,rs7558466,-0.841  
2,91.382,rs10203061,-0.835  
2,91.422,rs4671873,-0.827  
2,91.428,rs17034987,-0.825  
2,91.440,rs17523693,-0.822  
2,91.575,rs3732042,-0.786  
2,91.582,rs6746740,-0.782  
2,91.593,rs10179521,-0.777  
2,91.603,rs6717329,-0.819  
2,91.633,rs3732046,-0.790  
2,91.677,rs7595037,-0.770  
2,91.692,rs6719948,-0.764  
2,91.869,rs4854436,-0.854  
2,91.880,rs10178143,-0.859  
2,91.948,rs4309612,-0.888  
2,91.999,rs7557267,-0.912  
2,92.003,rs7605681,-0.914  
2,92.014,rs10182268,-0.958  
2,92.022,rs2311424,-1.044  
2,92.037,rs2231344,-1.078  
2,92.074,rs10191936,-1.109  
2,92.076,rs2312070,-1.150  
2,92.081,rs10169464,-1.227  
2,92.151,rs7585796,-1.212  
2,92.152,rs6743513,-1.212  
2,92.208,rs4854538,-1.235

2,92.228,rs4241349,-1.244  
2,92.278,rs11126220,-1.178  
2,92.500,rs6758228,-1.105  
2,92.545,rs7577851,-1.113  
2,92.752,rs7563401,-1.257  
2,92.874,rs11677137,-1.325  
2,92.945,rs2464698,-1.331  
2,93.068,rs1871241,-1.351  
2,93.153,rs11681491,-1.346  
2,93.420,rs1807968,-1.330  
2,93.497,rs454305,-1.279  
2,93.560,rs428225,-1.255  
2,93.588,rs1523300,-1.191  
2,93.742,rs2108481,-1.147  
2,93.757,rs12466990,-1.144  
2,93.937,rs758062,-1.100  
2,94.262,rs10184254,-1.017  
2,94.303,rs6712273,-1.013  
2,94.344,rs2075221,-1.026  
2,94.387,rs10204437,-0.964  
2,94.396,rs2075225,-0.953  
2,94.411,rs17006471,-0.955  
2,94.643,rs3771389,-1.042  
2,94.681,rs10185490,-1.034  
2,94.746,rs2072463,-0.953  
2,94.779,rs17721027,-0.827  
2,94.781,rs2058552,-0.885  
2,94.868,rs6760496,-0.882  
2,94.948,rs13420242,-0.879  
2,95.143,rs6546674,-0.903  
2,95.257,rs1458868,-0.906  
2,95.429,rs4852771,-0.851  
2,96.107,rs13406110,-0.839  
2,96.158,rs10865385,-0.849  
2,96.165,rs4852787,-0.859  
2,96.171,rs12998057,-0.871  
2,96.214,rs6749480,-0.894  
2,96.214,rs11689987,-0.894  
2,96.250,rs11690862,-0.908  
2,96.296,rs4350773,-0.936  
2,96.367,rs2303596,-0.978  
2,96.396,rs17007067,-0.975  
2,96.406,rs10183967,-0.970  
2,96.451,rs17616999,-0.928  
2,96.467,rs1529409,-0.924  
2,96.481,rs2303606,-0.919  
2,96.533,rs227782,-0.942  
2,96.647,rs750355,-1.049  
2,96.671,rs10192575,-1.086  
2,96.740,rs1427688,-1.145  
2,96.773,rs12623780,-1.172  
2,96.795,rs6546721,-1.190  
2,96.831,rs2419778,-1.215  
2,96.939,rs10208677,-1.194  
2,96.988,rs6546731,-1.182  
2,97.147,rs7558552,-1.231  
2,97.151,rs6722569,-1.232  
2,97.288,rs1046139,-1.312  
2,97.610,rs11886257,-1.190  
2,97.677,rs11893547,-1.166  
2,97.682,rs11559241,-1.163

2,97.741,rs7609407,-1.137  
2,98.105,rs13008860,-1.014  
2,98.510,rs2689774,-1.121  
2,98.536,rs1653259,-1.127  
2,98.566,rs13415017,-1.134  
2,98.567,rs13024800,-1.136  
2,98.574,rs1618091,-1.242  
2,98.616,rs6737156,-1.207  
2,98.648,rs4852323,-1.193  
2,98.703,rs13416937,-1.174  
2,98.848,rs828867,-1.257  
2,98.876,rs828842,-1.271  
2,99.016,rs895988,-1.410  
2,99.042,rs17009774,-1.416  
2,99.057,rs2075007,-1.422  
2,99.531,rs13407946,-1.622  
2,99.540,rs205651,-1.626  
2,99.692,rs2021753,-1.763  
2,99.786,rs642247,-1.843  
2,99.830,rs680545,-1.783  
2,99.844,rs3771781,-1.781  
2,99.884,rs17010504,-1.684  
2,99.891,rs10496197,-1.665  
2,99.916,rs1002026,-1.707  
2,99.922,rs11686274,-1.722  
2,100.048,rs13012537,-1.835  
2,100.074,rs6546952,-1.857  
2,100.103,rs3771817,-1.901  
2,100.136,rs3771836,-1.865  
2,100.139,rs759588,-1.927  
2,100.151,rs3771848,-1.908  
2,100.192,rs6717216,-1.889  
2,100.199,rs980545,-1.894  
2,100.207,rs1861430,-1.904  
2,100.233,rs10490309,-1.894  
2,100.288,rs2110933,-1.866  
2,100.300,rs6749524,-1.842  
2,100.353,rs6737535,-1.711  
2,100.356,rs6546997,-1.697  
2,100.363,rs11126470,-1.671  
2,100.368,rs12611634,-1.650  
2,100.374,rs10208759,-1.715  
2,100.376,rs7564244,-1.714  
2,100.390,rs13019578,-1.707  
2,100.396,rs2588498,-1.707  
2,100.448,rs11899583,-1.676  
2,100.458,rs759255,-1.669  
2,100.488,rs917235,-1.650  
2,100.520,rs7570229,-1.634  
2,100.565,rs7560262,-1.625  
2,100.698,rs6547035,-1.595  
2,100.714,rs12612334,-1.663  
2,100.753,rs2422307,-1.643  
2,100.755,rs7588316,-1.645  
2,100.804,rs6708139,-1.688  
2,100.992,rs1405343,-1.694  
2,101.048,rs17012485,-1.695  
2,101.084,rs6730042,-1.693  
2,101.090,rs6547078,-1.702  
2,101.110,rs950291,-1.737  
2,101.121,rs1879191,-1.758

2,101.132,rs7605051,-1.739  
2,101.142,rs1401841,-1.761  
2,101.165,rs7563300,-1.811  
2,101.205,rs17012803,-1.856  
2,101.239,rs7592517,-1.885  
2,101.266,rs10203812,-1.926  
2,101.344,rs7580730,-2.112  
2,101.348,rs985812,-2.109  
2,101.368,rs1519998,-1.880  
2,101.370,rs4853265,-1.873  
2,101.375,rs10210863,-1.873  
2,101.392,rs13009537,-1.880  
2,101.396,rs7609111,-1.881  
2,101.583,rs7563917,-1.889  
2,101.683,rs13398218,-1.917  
2,101.718,rs17013760,-1.846  
2,101.742,rs4369888,-1.794  
2,101.805,rs10496205,-1.861  
2,101.882,rs1505231,-1.939  
2,101.903,rs9309515,-2.008  
2,101.920,rs424198,-2.061  
2,101.939,rs1922807,-2.097  
2,101.944,rs6749190,-2.072  
2,101.954,rs4561696,-2.061  
2,101.955,rs1882681,-1.975  
2,101.958,rs1922809,-1.999  
2,101.959,rs12614202,-2.006  
2,101.966,rs2861078,-2.022  
2,101.972,rs12713914,-2.019  
2,101.996,rs17014206,-2.005  
2,102.030,rs12713918,-1.987  
2,102.037,rs4473409,-1.968  
2,102.093,rs4485592,-1.978  
2,102.140,rs10185229,-1.939  
2,102.164,rs11676317,-1.890  
2,102.189,rs6722155,-1.909  
2,102.226,rs1586421,-1.933  
2,102.253,rs992870,-1.955  
2,102.439,rs4853368,-1.851  
2,102.451,rs7569428,-1.837  
2,102.500,rs7586511,-1.823  
2,102.572,rs17040590,-1.963  
2,102.584,rs2946582,-1.978  
2,102.667,rs4853406,-2.005  
2,102.704,rs1869083,-2.000  
2,102.821,rs2177098,-2.029  
2,103.106,rs10208925,-2.423  
2,103.177,rs17015937,-2.446  
2,103.199,rs1261234,-2.448  
2,103.222,rs10520219,-2.448  
2,103.324,rs1666768,-2.426  
2,103.340,rs10520223,-2.554  
2,103.443,rs1448212,-2.654  
2,103.470,rs2073443,-2.641  
2,103.514,rs2070708,-2.602  
2,103.522,rs7608639,-2.600  
2,103.537,rs3819315,-2.596  
2,103.545,rs1589614,-2.597  
2,103.599,rs892865,-2.585  
2,103.692,rs6710298,-2.562  
2,103.702,rs6757830,-2.544

2,103.751,rs12471468,-2.492  
2,103.807,rs10496221,-2.501  
2,103.852,rs4143799,-2.473  
2,103.885,rs2100290,-2.433  
2,103.901,rs1864548,-2.586  
2,103.907,rs17040658,-2.583  
2,103.924,rs6716273,-2.570  
2,103.937,rs11126736,-2.475  
2,103.953,rs13400937,-2.478  
2,103.955,rs3795994,-2.467  
2,103.960,rs13006976,-2.421  
2,103.964,rs17727983,-2.417  
2,103.965,rs4422182,-2.327  
2,103.966,rs13030183,-2.415  
2,103.967,rs10183482,-2.435  
2,103.971,rs955749,-2.523  
2,103.975,rs6725030,-2.438  
2,103.981,rs10496231,-2.455  
2,104.004,rs2102548,-2.372  
2,104.008,rs6734305,-2.297  
2,104.011,rs6742151,-2.309  
2,104.021,rs3755095,-2.303  
2,104.027,rs13034462,-2.278  
2,104.034,rs2916516,-2.268  
2,104.035,rs7572401,-2.242  
2,104.037,rs1816611,-2.112  
2,104.043,rs1030733,-2.111  
2,104.046,rs4591366,-2.108  
2,104.047,rs6752828,-2.107  
2,104.048,rs2974132,-2.106  
2,104.125,rs671802,-2.036  
2,105.381,rs17018689,-2.155  
2,105.467,rs318369,-2.123  
2,105.487,rs1930,-2.113  
2,105.594,rs1444541,-2.055  
2,105.602,rs6747004,-2.051  
2,105.650,rs1434076,-1.983  
2,105.659,rs2004016,-1.976  
2,105.691,rs3770310,-1.955  
2,105.700,rs3755105,-1.943  
2,105.782,rs11691644,-1.815  
2,105.788,rs1370339,-1.805  
2,105.815,rs1265750,-1.853  
2,105.928,rs2131255,-1.821  
2,106.147,rs6738160,-1.755  
2,106.313,rs2862499,-1.790  
2,106.616,rs1432155,-1.911  
2,106.853,rs10167584,-2.094  
2,106.912,rs1430726,-2.116  
2,106.979,rs4393782,-2.131  
2,107.057,rs12104529,-2.144  
2,107.345,rs10469974,-2.133  
2,107.711,rs6547486,-2.269  
2,107.751,rs1991542,-2.271  
2,107.762,rs11894010,-2.335  
2,107.763,rs11126917,-2.341  
2,107.773,rs17023719,-2.369  
2,107.782,rs1451776,-2.404  
2,107.789,rs3100111,-2.399  
2,107.813,rs17316184,-2.419  
2,107.823,rs4832067,-2.394

2,107.829,rs6737955,-2.370  
2,107.835,rs7590843,-2.343  
2,107.852,rs10496309,-2.403  
2,107.870,rs13002679,-2.450  
2,108.085,rs1529385,-2.159  
2,108.095,rs1365899,-2.146  
2,108.117,rs999401,-2.104  
2,108.164,rs9309619,-2.020  
2,108.180,rs2086175,-1.991  
2,108.268,rs1979403,-1.909  
2,108.637,rs2272514,-1.814  
2,108.691,rs2702035,-1.820  
2,108.786,rs4832135,-1.861  
2,108.897,rs17025940,-1.920  
2,108.913,rs17762406,-1.925  
2,108.998,rs2583547,-1.955  
2,109.199,rs908301,-1.930  
2,109.234,rs6732834,-1.946  
2,109.258,rs6748174,-1.951  
2,109.282,rs6737773,-1.958  
2,109.486,rs6741368,-2.018  
2,109.536,rs11690650,-2.016  
2,109.660,rs4832175,-1.997  
2,109.669,rs908307,-1.996  
2,109.745,rs6714421,-2.008  
2,109.912,rs2028900,-2.014  
2,110.054,rs2232739,-1.899  
2,110.058,rs6643,-1.889  
2,110.123,rs2164807,-1.715  
2,110.126,rs6743301,-1.712  
2,110.138,rs1465821,-1.702  
2,110.142,rs869778,-1.725  
2,110.147,rs10207756,-1.816  
2,110.159,rs11127000,-1.927  
2,110.286,rs1124686,-2.000  
2,110.328,rs9677502,-2.068  
2,110.394,rs1033287,-2.046  
2,110.451,rs6752371,-2.051  
2,110.479,rs433655,-2.049  
2,110.596,rs938487,-2.042  
2,110.622,rs4832316,-2.032  
2,111.842,rs6547750,-1.889  
2,111.925,rs1441642,-1.647  
2,111.928,rs12994970,-1.645  
2,112.015,rs13019346,-1.630  
2,112.022,rs4972052,-1.662  
2,112.032,rs7591600,-1.696  
2,112.033,rs11684168,-1.695  
2,112.037,rs4972211,-1.693  
2,112.073,rs2848122,-1.652  
2,112.075,rs2012201,-1.651  
2,112.738,rs2113418,-1.358  
2,112.776,rs2193883,-1.457  
2,112.817,rs1724120,-1.490  
2,112.839,rs2305935,-1.506  
2,112.847,rs1870340,-1.511  
2,112.859,rs11688674,-1.520  
2,112.870,rs7599598,-1.527  
2,112.992,rs10171740,-1.521  
2,113.189,rs11683207,-1.527  
2,113.194,rs6714710,-1.528



2,113.201,rs746004,-1.590  
2,113.589,rs12989231,-1.543  
2,113.662,rs11677188,-1.577  
2,113.680,rs4851839,-1.584  
2,113.690,rs12473335,-1.584  
2,113.739,rs11901562,-1.592  
2,113.818,rs937725,-1.581  
2,113.820,rs1394431,-1.591  
2,113.822,rs3769747,-1.613  
2,113.967,rs1516085,-1.644  
2,113.996,rs1028144,-1.652  
2,114.012,rs885036,-1.653  
2,114.086,rs2871244,-1.662  
2,114.104,rs1517682,-1.664  
2,114.133,rs4851169,-1.667  
2,114.483,rs3087386,-1.701  
2,114.556,rs3792119,-1.709  
2,114.564,rs3828312,-1.706  
2,114.659,rs6542889,-1.726  
2,114.714,rs10185087,-1.739  
2,114.739,rs6756248,-1.731  
2,114.772,rs6735012,-1.736  
2,114.873,rs1115910,-1.734  
2,115.268,rs4850931,-1.722  
2,115.284,rs4850932,-1.722  
2,115.312,rs6542950,-1.723  
2,115.335,rs6716842,-1.719  
2,115.385,rs6709376,-1.716  
2,115.479,rs13005184,-1.710  
2,115.523,rs1879121,-1.780  
2,115.635,rs11123842,-1.717  
2,115.642,rs1567804,-1.633  
2,115.678,rs7582332,-1.601  
2,115.785,rs7598826,-1.487  
2,115.834,rs7585886,-1.474  
2,115.854,rs356643,-1.459  
2,115.870,rs13025524,-1.469  
2,115.995,rs6543007,-1.704  
2,116.035,rs2309938,-1.702  
2,116.389,rs2310175,-1.529  
2,116.413,rs6755229,-1.518  
2,116.417,rs10203724,-1.517  
2,116.478,rs12712127,-1.489  
2,116.500,rs4851541,-1.478  
2,116.567,rs3917292,-1.460  
2,116.588,rs3917329,-1.457  
2,116.676,rs2302612,-1.441  
2,116.715,rs12475055,-1.422  
2,116.781,rs12999517,-1.400  
2,116.787,rs1921622,-1.403  
2,116.870,rs11465730,-1.461  
2,117.027,rs10184340,-1.499  
2,117.044,rs7561632,-1.472  
2,117.094,rs1052431,-1.384  
2,117.150,rs2732846,-1.398  
2,117.249,rs1024787,-1.399  
2,117.317,rs4569500,-1.396  
2,117.346,rs6735868,-1.323  
2,117.352,rs956966,-1.306  
2,117.363,rs6543194,-1.297  
2,117.521,rs6709515,-1.270

2,117.543,rs4319952,-1.267  
2,117.567,rs1430071,-1.261  
2,117.640,rs10198191,-1.242  
2,117.723,rs10191917,-1.221  
2,117.890,rs6761396,-1.190  
2,118.199,rs10177144,-1.183  
2,118.294,rs13391945,-1.173  
2,118.314,rs6713996,-1.107  
2,118.478,rs1033302,-1.158  
2,118.499,rs12620665,-1.218  
2,118.524,rs11123995,-1.237  
2,118.573,rs11123997,-1.282  
2,118.575,rs7598356,-1.283  
2,118.583,rs12479172,-1.250  
2,118.639,rs7567189,-1.275  
2,118.672,rs11893876,-1.282  
2,118.691,rs6727249,-1.286  
2,118.742,rs4851712,-1.297  
2,118.852,rs11124005,-1.292  
2,119.028,rs10205766,-1.240  
2,119.100,rs6543282,-1.220  
2,119.120,rs10187600,-1.225  
2,119.138,rs6729109,-1.228  
2,119.178,rs13028605,-1.190  
2,119.182,rs6761331,-1.186  
2,119.193,rs6736495,-1.156  
2,119.201,rs2576791,-1.142  
2,119.225,rs7584136,-1.006  
2,119.269,rs12471644,-1.014  
2,119.373,rs2278501,-0.992  
2,119.384,rs6738207,-1.010  
2,119.419,rs4374396,-1.018  
2,119.424,rs6543293,-1.018  
2,119.430,rs1914748,-1.026  
2,119.448,rs7583367,-0.936  
2,119.460,rs884876,-0.909  
2,119.488,rs17652317,-0.939  
2,119.500,rs13006682,-0.914  
2,119.536,rs1568261,-0.880  
2,119.591,rs2084779,-0.872  
2,119.594,rs1518611,-0.819  
2,119.642,rs6743358,-0.870  
2,119.644,rs4851073,-0.869  
2,119.692,rs4851831,-0.779  
2,119.700,rs13025485,-0.775  
2,119.722,rs336506,-0.832  
2,119.775,rs1114882,-0.832  
2,119.905,rs6740343,-0.792  
2,119.941,rs2098836,-0.798  
2,119.950,rs17721404,-0.803  
2,119.972,rs2567195,-0.812  
2,120.035,rs10182846,-0.825  
2,120.046,rs2377443,-0.840  
2,120.067,rs7595084,-0.869  
2,120.214,rs4851946,-0.934  
2,120.266,rs4449127,-0.905  
2,120.298,rs4308118,-0.881  
2,120.334,rs4234103,-0.793  
2,120.533,rs2125904,-0.694  
2,120.638,rs17033164,-0.773  
2,120.712,rs1006413,-0.826

2,120.732,rs1470590,-0.796  
2,120.775,rs17033380,-0.818  
2,120.786,rs11681787,-0.824  
2,120.828,rs7557745,-0.834  
2,120.852,rs13033073,-0.831  
2,120.931,rs12464185,-0.853  
2,120.959,rs2030675,-0.859  
2,120.990,rs6419584,-0.824  
2,120.991,rs2907907,-0.823  
2,121.051,rs1558398,-0.847  
2,121.427,rs6746088,-0.800  
2,121.457,rs10427352,-0.801  
2,121.549,rs266168,-0.807  
2,121.796,rs6744070,-0.810  
2,122.162,rs831983,-0.796  
2,122.174,rs6542736,-0.788  
2,122.238,rs3806536,-0.748  
2,122.247,rs6753886,-0.734  
2,122.251,rs12469531,-0.731  
2,122.253,rs12712007,-0.730  
2,122.278,rs1385956,-0.718  
2,122.345,rs17036061,-0.636  
2,122.349,rs3731680,-0.641  
2,122.394,rs10169264,-0.692  
2,122.438,rs7568838,-0.688  
2,122.559,rs260642,-0.674  
2,122.575,rs13427084,-0.659  
2,122.576,rs11691107,-0.659  
2,122.581,rs17269487,-0.659  
2,122.593,rs4676049,-0.660  
2,122.607,rs1471074,-0.708  
2,122.683,rs2163261,-0.727  
2,122.719,rs7605559,-0.710  
2,122.726,rs6714032,-0.707  
2,122.735,rs7568694,-0.704  
2,122.806,rs10171167,-0.684  
2,122.811,rs10221803,-0.685  
2,122.856,rs7580778,-0.612  
2,122.867,rs1010840,-0.605  
2,122.869,rs7601026,-0.606  
2,122.876,rs17197569,-0.612  
2,123.038,rs6747701,-0.636  
2,123.047,rs17463266,-0.636  
2,123.621,rs11887934,-0.641  
2,123.847,rs4849121,-0.703  
2,123.872,rs1533299,-0.706  
2,123.960,rs4849255,-0.753  
2,123.992,rs6732992,-0.756  
2,124.003,rs3789106,-0.755  
2,124.037,rs10496436,-0.754  
2,124.111,rs12986962,-0.708  
2,124.113,rs13000374,-0.708  
2,124.186,rs2289321,-0.739  
2,124.189,rs1439287,-0.742  
2,124.321,rs6542368,-0.824  
2,124.346,rs13395957,-0.841  
2,124.617,rs1448187,-0.821  
2,124.642,rs17775614,-0.854  
2,124.687,rs11123551,-0.969  
2,124.805,rs10171109,-0.933  
2,124.806,rs13011755,-0.933

2,124.839,rs7596295,-0.931  
2,124.867,rs3898028,-0.964  
2,124.872,rs7605443,-0.970  
2,124.940,rs1400323,-1.023  
2,125.004,rs10205067,-1.043  
2,125.070,rs954521,-1.062  
2,125.098,rs6707397,-1.070  
2,125.371,rs4849067,-1.071  
2,125.388,rs6747985,-1.079  
2,125.392,rs3961919,-1.081  
2,125.400,rs3789724,-1.112  
2,125.420,rs2305150,-1.091  
2,125.457,rs2515406,-1.063  
2,125.463,rs17042786,-1.064  
2,125.469,rs6761276,-1.064  
2,125.480,rs17042833,-1.067  
2,125.488,rs1542176,-1.068  
2,125.561,rs6739883,-1.262  
2,125.573,rs4849159,-1.194  
2,125.652,rs1110839,-1.339  
2,125.660,rs3768768,-1.340  
2,125.726,rs10864913,-1.346  
2,125.754,rs1191694,-1.327  
2,125.766,rs1191684,-1.326  
2,125.965,rs761647,-1.197  
2,126.004,rs3982819,-1.160  
2,126.024,rs2921879,-1.144  
2,126.148,rs4849265,-1.160  
2,126.178,rs17632109,-1.151  
2,126.247,rs2687625,-1.125  
2,126.338,rs17197611,-1.085  
2,126.353,rs9308688,-1.078  
2,126.421,rs10496455,-1.055  
2,126.484,rs275421,-1.011  
2,126.572,rs3132069,-0.946  
2,126.978,rs3132055,-0.782  
2,127.027,rs6715662,-0.789  
2,127.058,rs10208402,-0.793  
2,127.064,rs4849337,-0.748  
2,127.096,rs1430108,-0.734  
2,127.100,rs7590021,-0.722  
2,127.117,rs6729737,-0.735  
2,127.135,rs6542217,-0.736  
2,127.144,rs10496470,-0.728  
2,127.146,rs13022574,-0.726  
2,127.150,rs1561070,-0.722  
2,127.173,rs7605779,-0.667  
2,127.180,rs7606549,-0.664  
2,127.216,rs2420449,-0.637  
2,127.229,rs6755195,-0.633  
2,127.279,rs2175176,-0.634  
2,127.322,rs17452616,-0.579  
2,127.327,rs10864934,-0.573  
2,127.356,rs13416481,-0.569  
2,127.489,rs2421100,-0.547  
2,127.523,rs843399,-0.542  
2,127.826,rs11890985,-0.587  
2,127.976,rs17045601,-0.630  
2,128.006,rs4849449,-0.639  
2,128.093,rs6742579,-0.612  
2,128.209,rs2584980,-0.605

2,128.394,rs10167828,-0.606  
2,128.649,rs4848430,-0.562  
2,128.653,rs11901513,-0.555  
2,128.674,rs332895,-0.515  
2,128.697,rs2035171,-0.500  
2,128.797,rs6741941,-0.514  
2,128.818,rs290876,-0.507  
2,128.838,rs17047088,-0.500  
2,128.859,rs10439399,-0.496  
2,128.864,rs1516006,-0.495  
2,128.900,rs10210418,-0.495  
2,128.901,rs10211133,-0.504  
2,128.905,rs367201,-0.536  
2,128.930,rs10490632,-0.557  
2,129.007,rs1385925,-0.620  
2,129.016,rs2161830,-0.628  
2,129.033,rs4848493,-0.647  
2,129.038,rs12616545,-0.654  
2,129.051,rs4848497,-0.665  
2,129.130,rs6739488,-0.745  
2,129.139,rs1437690,-0.752  
2,129.140,rs1965130,-0.753  
2,129.150,rs1344896,-0.754  
2,129.223,rs332092,-0.754  
2,129.226,rs17005473,-0.755  
2,129.246,rs10221632,-0.764  
2,129.256,rs11687120,-0.762  
2,129.259,rs4848526,-0.759  
2,129.274,rs7602200,-0.754  
2,129.295,rs3806496,-0.796  
2,129.303,rs17009716,-0.808  
2,129.317,rs4848532,-0.823  
2,129.318,rs17010486,-0.781  
2,129.319,rs6712180,-0.737  
2,129.322,rs729735,-0.636  
2,129.340,rs893769,-0.592  
2,129.348,rs330763,-0.551  
2,129.356,rs10496557,-0.500  
2,129.360,rs5018771,-0.485  
2,129.362,rs4849760,-0.481  
2,129.366,rs1867750,-0.471  
2,129.369,rs11680207,-0.472  
2,129.374,rs7584975,-0.476  
2,129.395,rs734846,-0.546  
2,129.397,rs838073,-0.552  
2,129.401,rs1545360,-0.560  
2,129.404,rs2166504,-0.565  
2,129.408,rs13391616,-0.569  
2,129.426,rs6542524,-0.585  
2,129.435,rs6727485,-0.596  
2,129.471,rs6757604,-0.638  
2,129.480,rs2579612,-0.587  
2,129.482,rs4383344,-0.587  
2,129.496,rs2587695,-0.634  
2,129.526,rs6761357,-0.632  
2,129.533,rs1568538,-0.680  
2,129.592,rs949530,-0.691  
2,129.609,rs3111727,-0.689  
2,130.342,rs4848580,-0.594  
2,130.645,rs10496561,-0.546  
2,130.902,rs7589138,-0.510

2,131.075,rs13410055,-0.498  
2,131.290,rs12623934,-0.496  
2,131.425,rs6731937,-0.486  
2,131.454,rs13408457,-0.442  
2,131.539,rs10186456,-0.426  
2,131.603,rs4504000,-0.404  
2,131.685,rs6542599,-0.403  
2,131.929,rs2140779,-0.364  
2,131.930,rs17389324,-0.364  
2,131.932,rs17050267,-0.363  
2,132.055,rs896499,-0.331  
2,132.072,rs1568836,-0.310  
2,132.076,rs4849909,-0.339  
2,132.268,rs1349561,-0.365  
2,132.733,rs2053989,-0.412  
2,132.758,rs735557,-0.382  
2,132.806,rs895491,-0.366  
2,132.841,rs7559777,-0.334  
2,132.877,rs2166898,-0.327  
2,132.933,rs277547,-0.336  
2,132.959,rs277534,-0.325  
2,132.997,rs1187936,-0.290  
2,133.000,rs1992902,-0.288  
2,133.193,rs735370,-0.209  
2,133.309,rs280224,-0.176  
2,133.353,rs12711539,-0.182  
2,133.433,rs10184095,-0.192  
2,133.505,rs4271771,-0.200  
2,133.539,rs4488664,-0.198  
2,133.570,rs4848692,-0.196  
2,133.587,rs4622731,-0.197  
2,133.618,rs6753743,-0.191  
2,133.681,rs2250092,-0.201  
2,133.774,rs2953083,-0.177  
2,133.945,rs12479320,-0.190  
2,134.711,rs6734147,-0.068  
2,134.824,rs11889169,-0.052  
2,134.984,rs1432312,-0.027  
2,135.046,rs1320869,-0.010  
2,135.049,rs6756499,-0.010  
2,135.060,rs1881881,-0.008  
2,135.065,rs17007730,-0.008  
2,135.066,rs17007740,-0.008  
2,135.072,rs12471629,-0.005  
2,135.078,rs896902,-0.003  
2,135.129,rs6725236,0.003  
2,135.130,rs7582698,0.003  
2,135.152,rs4241113,0.006  
2,135.227,rs1527978,0.025  
2,135.242,rs1395930,0.029  
2,135.248,rs10207388,0.030  
2,135.260,rs299575,0.032  
2,135.270,rs2661038,0.032  
2,135.443,rs955303,0.026  
2,135.468,rs2030833,0.025  
2,135.764,rs13385327,0.021  
2,135.839,rs2901018,0.017  
2,136.051,rs1159139,0.009  
2,136.324,rs925796,0.006  
2,136.432,rs13415885,0.010  
2,136.452,rs6742628,0.010

2,136.620,rs7577916,0.008  
2,136.703,rs17319464,0.008  
2,136.775,rs11123030,0.010  
2,136.807,rs779992,0.012  
2,137.000,rs11123037,0.025  
2,137.084,rs1543901,0.040  
2,137.232,rs13015323,0.067  
2,137.244,rs12470517,0.055  
2,137.278,rs6541961,0.056  
2,137.430,rs11684957,0.065  
2,137.473,rs7580383,0.073  
2,137.573,rs2168024,0.098  
2,137.620,rs314712,0.118  
2,137.653,rs1435578,0.129  
2,137.973,rs7571928,0.136  
2,138.042,rs6715359,0.138  
2,138.391,rs6720122,0.153  
2,138.399,rs6726563,0.153  
2,138.620,rs12994681,0.165  
2,139.355,rs437866,0.208  
2,139.604,rs11883942,0.233  
2,139.678,rs7596310,0.222  
2,139.683,rs6707983,0.222  
2,139.744,rs9287557,0.212  
2,139.752,rs6714079,0.212  
2,139.817,rs4662685,0.209  
2,139.849,rs13425954,0.190  
2,139.876,rs17014263,0.190  
2,139.887,rs10187088,0.201  
2,139.943,rs10210965,0.222  
2,139.975,rs6732888,0.229  
2,140.057,rs4405698,0.245  
2,140.191,rs10928992,0.236  
2,140.355,rs556902,0.251  
2,140.381,rs754737,0.246  
2,140.421,rs6713701,0.275  
2,140.447,rs17014788,0.280  
2,140.743,rs7590705,0.326  
2,140.809,rs7570609,0.342  
2,140.858,rs4611601,0.359  
2,140.910,rs13417920,0.400  
2,140.929,rs2243934,0.405  
2,141.051,rs6736731,0.447  
2,141.150,rs2261682,0.481  
2,141.239,rs2438039,0.502  
2,141.249,rs11682273,0.504  
2,141.375,rs12617108,0.495  
2,141.479,rs17178720,0.472  
2,141.569,rs734193,0.451  
2,141.573,rs6717511,0.451  
2,141.577,rs17016070,0.453  
2,141.604,rs714129,0.468  
2,141.634,rs11890277,0.499  
2,141.649,rs10496668,0.515  
2,141.671,rs882275,0.535  
2,141.718,rs9783995,0.563  
2,141.726,rs4662808,0.563  
2,141.775,rs4662827,0.562  
2,141.784,rs935846,0.559  
2,141.834,rs841080,0.563  
2,141.851,rs7564226,0.558

2,141.970,rs6738894,0.543  
2,141.981,rs13010732,0.534  
2,142.045,rs6744496,0.522  
2,142.049,rs10496671,0.520  
2,142.125,rs12478682,0.506  
2,142.336,rs4662878,0.489  
2,142.406,rs908848,0.478  
2,142.475,rs13024819,0.452  
2,142.619,rs7567687,0.486  
2,142.985,rs1012734,0.384  
2,143.075,rs4662980,0.413  
2,143.083,rs10189546,0.424  
2,143.147,rs4622658,0.576  
2,143.164,rs2952605,0.564  
2,143.207,rs2707652,0.588  
2,143.274,rs4233600,0.722  
2,143.291,rs2407074,0.689  
2,143.666,rs11674689,0.704  
2,143.792,rs3739122,0.718  
2,143.796,rs12151738,0.718  
2,144.173,rs272128,0.740  
2,144.231,rs272118,0.764  
2,144.256,rs1430706,0.756  
2,144.286,rs1542604,0.739  
2,144.305,rs4850303,0.752  
2,144.436,rs4850101,0.841  
2,144.477,rs2403238,0.856  
2,144.892,rs2313693,0.920  
2,144.972,rs6731616,0.931  
2,145.040,rs12472079,0.886  
2,145.345,rs10928155,0.897  
2,145.357,rs4088115,0.897  
2,145.503,rs4063769,1.021  
2,145.617,rs4577331,0.974  
2,145.663,rs4621214,1.003  
2,145.795,rs7582293,0.726  
2,145.820,rs4082157,0.582  
2,145.893,rs7422689,0.795  
2,145.906,rs2241763,0.768  
2,145.925,rs6430339,0.836  
2,145.976,rs2315593,0.890  
2,146.012,rs10173080,0.838  
2,146.040,rs3109156,0.817  
2,146.041,rs3109157,0.926  
2,146.053,rs11680742,0.915  
2,146.064,rs6760538,0.918  
2,146.094,rs964842,1.007  
2,146.113,rs2709549,1.040  
2,146.169,rs7595365,1.065  
2,146.173,rs1430626,1.068  
2,146.235,rs6729213,1.039  
2,146.246,rs11887257,1.041  
2,146.250,rs6712172,1.041  
2,146.270,rs6709364,1.044  
2,146.290,rs1374744,1.067  
2,146.321,rs2577634,1.099  
2,146.361,rs12619661,1.070  
2,146.366,rs6430384,1.086  
2,146.376,rs2320399,1.089  
2,146.394,rs1437897,1.049  
2,146.409,rs7572356,1.037



2,146.415,rs6730963,1.032  
2,146.467,rs6430390,1.021  
2,146.531,rs17793104,1.024  
2,146.543,rs6716343,1.020  
2,146.557,rs1344809,1.014  
2,146.622,rs1821421,0.996  
2,146.857,rs7577925,1.030  
2,147.015,rs1865582,1.064  
2,147.213,rs16825174,1.045  
2,147.245,rs13419826,1.056  
2,147.294,rs4953883,1.038  
2,147.421,rs2043233,0.964  
2,147.457,rs891821,0.953  
2,147.502,rs1432282,0.948  
2,147.508,rs12622133,0.950  
2,147.654,rs721270,1.023  
2,147.655,rs16827735,1.023  
2,147.661,rs1901435,1.026  
2,147.776,rs4522658,1.023  
2,147.905,rs4589813,1.057  
2,148.006,rs6430462,1.127  
2,148.014,rs1562345,1.130  
2,148.025,rs7579501,1.194  
2,148.057,rs4603824,1.178  
2,148.084,rs10928465,1.208  
2,148.130,rs6714405,1.196  
2,148.240,rs11897842,1.096  
2,148.322,rs10208875,1.073  
2,148.483,rs16830022,1.003  
2,148.621,rs11900787,0.936  
2,148.635,rs1257216,0.937  
2,148.649,rs3748896,0.929  
2,148.655,rs12987785,0.956  
2,148.665,rs1257193,0.999  
2,148.677,rs16830277,1.041  
2,148.681,rs935471,1.053  
2,148.722,rs2290047,1.092  
2,148.746,rs755503,1.113  
2,148.768,rs3791312,1.153  
2,148.778,rs535900,1.134  
2,148.783,rs539588,1.131  
2,148.852,rs6730778,1.103  
2,148.884,rs6705916,1.090  
2,148.971,rs6719604,1.127  
2,148.981,rs13389245,1.128  
2,148.994,rs10198552,1.113  
2,149.008,rs7564746,1.091  
2,149.073,rs16831235,1.033  
2,149.113,rs2874739,1.003  
2,149.535,rs11903319,1.063  
2,149.545,rs4988186,1.063  
2,149.601,rs4954555,1.059  
2,149.631,rs10191360,1.057  
2,149.671,rs16835386,1.091  
2,149.877,rs10182108,1.256  
2,149.923,rs2465095,1.283  
2,149.934,rs2114750,1.287  
2,150.103,rs524958,1.202  
2,150.207,rs11884290,1.167  
2,150.282,rs6750400,1.136  
2,150.283,rs979976,1.191

2,150.351,rs9784168,1.147  
2,150.380,rs6430676,1.070  
2,150.381,rs16838540,1.076  
2,150.388,rs6728076,1.113  
2,150.404,rs9287472,1.110  
2,150.607,rs4954379,1.203  
2,150.672,rs12613078,1.185  
2,150.679,rs5010976,1.189  
2,150.691,rs7591709,1.174  
2,150.714,rs1048821,1.020  
2,150.885,rs6730857,1.060  
2,150.932,rs6738271,1.080  
2,151.010,rs2071048,1.181  
2,151.096,rs10496795,1.206  
2,151.140,rs4273272,1.230  
2,151.164,rs12476851,1.240  
2,151.175,rs6756311,1.159  
2,151.273,rs13011280,1.099  
2,151.320,rs4643591,1.068  
2,151.452,rs7576870,1.087  
2,151.566,rs13405108,1.039  
2,151.722,rs4954943,0.872  
2,151.787,rs10206559,0.806  
2,151.805,rs10928663,0.789  
2,151.822,rs4322786,0.775  
2,151.892,rs9636230,0.711  
2,151.940,rs1351919,0.691  
2,151.960,rs12612135,0.685  
2,152.120,rs6430852,0.623  
2,152.206,rs2376763,0.580  
2,152.221,rs6724734,0.583  
2,152.283,rs6722928,0.591  
2,152.346,rs3856354,0.614  
2,152.405,rs1015739,0.576  
2,152.472,rs1405930,0.568  
2,152.485,rs4954669,0.575  
2,152.507,rs2950606,0.595  
2,152.522,rs16843445,0.642  
2,152.631,rs1486969,0.681  
2,152.808,rs1464212,0.788  
2,152.822,rs11897270,0.796  
2,152.939,rs2380881,0.779  
2,152.966,rs6430913,0.726  
2,153.018,rs1564933,0.706  
2,153.045,rs1441467,0.665  
2,153.056,rs544510,0.648  
2,153.102,rs6748249,0.658  
2,153.107,rs10170867,0.658  
2,153.109,rs6709738,0.659  
2,153.147,rs10496859,0.588  
2,153.234,rs2091302,0.580  
2,153.272,rs12996731,0.677  
2,153.285,rs1882638,0.635  
2,153.371,rs1521108,0.634  
2,153.413,rs983810,0.621  
2,153.420,rs2683824,0.619  
2,153.430,rs16845924,0.614  
2,153.486,rs4954702,0.579  
2,153.525,rs6753877,0.540  
2,153.534,rs4622654,0.531  
2,153.696,rs7568970,0.512

2,153.731,rs1437352,0.510  
2,153.755,rs16846822,0.492  
2,153.760,rs164979,0.488  
2,153.814,rs906648,0.349  
2,153.826,rs6758126,0.336  
2,153.831,rs1036505,0.336  
2,153.832,rs10496894,0.336  
2,153.845,rs16847064,0.342  
2,153.861,rs7558916,0.349  
2,153.922,rs11884813,0.370  
2,153.967,rs10496905,0.383  
2,153.978,rs1991997,0.387  
2,154.099,rs1191972,0.377  
2,154.101,rs16847914,0.375  
2,154.132,rs11677303,0.344  
2,154.216,rs2290140,0.344  
2,154.269,rs7590590,0.308  
2,154.516,rs4273167,0.295  
2,154.593,rs7558786,0.294  
2,154.924,rs4662299,0.248  
2,155.157,rs407867,0.256  
2,155.245,rs6750969,0.254  
2,155.272,rs6430004,0.233  
2,155.288,rs827228,0.250  
2,155.423,rs16858984,0.217  
2,155.438,rs10928169,0.214  
2,155.495,rs2381464,0.218  
2,155.505,rs11890035,0.220  
2,155.621,rs6735455,0.261  
2,155.664,rs6727288,0.273  
2,155.767,rs2969584,0.320  
2,155.772,rs10928190,0.321  
2,155.801,rs13409480,0.322  
2,155.828,rs1517912,0.324  
2,155.886,rs2292834,0.321  
2,155.912,rs11898334,0.319  
2,156.024,rs1257344,0.339  
2,156.130,rs10803501,0.337  
2,156.156,rs787143,0.340  
2,156.172,rs768145,0.342  
2,156.349,rs6719835,0.365  
2,156.487,rs1560224,0.370  
2,156.659,rs16823583,0.383  
2,156.846,rs10496963,0.390  
2,157.066,rs12105918,0.368  
2,157.077,rs7599224,0.367  
2,157.124,rs6755392,0.344  
2,157.190,rs1469346,0.359  
2,157.202,rs13010057,0.299  
2,157.220,rs4662448,0.283  
2,157.277,rs10490592,0.271  
2,157.327,rs2552546,0.264  
2,157.360,rs4488597,0.243  
2,157.398,rs10928295,0.220  
2,157.432,rs12988074,0.190  
2,157.457,rs10928303,0.185  
2,157.497,rs4233577,0.178  
2,157.822,rs1546602,0.147  
2,158.100,rs12476865,0.161  
2,158.269,rs16827260,0.158  
2,158.276,rs7567739,0.164

2,158.290,rs16827299,0.175  
2,158.350,rs10210722,0.162  
2,158.407,rs1895694,0.152  
2,158.954,rs7605678,0.180  
2,159.114,rs10199719,0.176  
2,159.125,rs13430177,0.176  
2,159.224,rs2121344,0.171  
2,159.323,rs769079,0.210  
2,159.648,rs12467520,0.175  
2,159.679,rs16829355,0.150  
2,160.053,rs7577450,0.092  
2,160.105,rs1471649,0.084  
2,160.133,rs2377510,0.081  
2,160.201,rs1404683,0.080  
2,160.310,rs6715376,0.095  
2,160.399,rs6706233,0.097  
2,160.487,rs1196696,0.077  
2,160.512,rs1196714,0.072  
2,160.540,rs1196687,0.071  
2,160.756,rs4667423,0.070  
2,160.774,rs10173317,0.069  
2,160.886,rs4667404,0.123  
2,160.935,rs9711252,0.120  
2,160.956,rs10171287,0.099  
2,160.987,rs16827625,0.105  
2,161.027,rs331124,0.121  
2,161.037,rs330650,0.125  
2,161.044,rs330647,0.124  
2,161.085,rs330609,0.092  
2,161.102,rs4667379,0.094  
2,161.131,rs4260269,0.103  
2,161.220,rs976396,0.078  
2,161.224,rs6710586,0.082  
2,161.226,rs12474944,0.085  
2,161.234,rs3108514,0.085  
2,161.253,rs2697339,0.105  
2,161.263,rs1528429,0.131  
2,161.277,rs7609510,0.116  
2,161.282,rs16828295,0.116  
2,161.327,rs2879878,0.115  
2,161.328,rs10930176,0.115  
2,161.399,rs2139425,0.115  
2,161.428,rs6734792,0.109  
2,161.471,rs6729783,0.077  
2,161.484,rs929388,0.068  
2,161.492,rs4664779,0.066  
2,161.500,rs12467192,0.064  
2,161.501,rs6433017,0.064  
2,161.504,rs1990149,0.063  
2,161.506,rs6723323,0.061  
2,161.511,rs1859724,0.059  
2,161.526,rs10200704,0.050  
2,161.605,rs6735085,0.041  
2,161.668,rs4664951,0.034  
2,161.708,rs289943,0.034  
2,161.807,rs6726634,0.034  
2,161.858,rs3845844,0.031  
2,161.874,rs10197940,0.030  
2,161.995,rs3732311,0.025  
2,162.043,rs4664493,0.015  
2,162.314,rs6727569,0.001

2,162.604,rs7600624,-0.000  
2,162.668,rs6434081,-0.000  
2,162.680,rs2577185,-0.000  
2,162.694,rs10497105,-0.001  
2,162.804,rs1962313,-0.000  
2,162.816,rs17400806,-0.001  
2,162.817,rs10497114,-0.001  
2,163.029,rs10931434,-0.001  
2,163.059,rs1946677,-0.001  
2,163.104,rs7582602,-0.003  
2,163.109,rs1369256,-0.003  
2,163.113,rs1369260,-0.003  
2,163.115,rs7606384,-0.003  
2,163.135,rs13414678,-0.005  
2,163.207,rs1439630,-0.005  
2,163.235,rs1579684,-0.001  
2,163.311,rs1955152,-0.000  
2,163.953,rs7592907,-0.000  
2,164.186,rs7571016,-0.001  
2,164.250,rs11694977,-0.001  
2,164.367,rs993412,-0.001  
2,164.448,rs1527862,-0.001  
2,164.456,rs799822,-0.001  
2,164.568,rs249703,-0.001  
2,164.650,rs774500,-0.001  
2,164.983,rs11690166,-0.002  
2,165.054,rs16838062,-0.002  
2,165.093,rs2591164,-0.002  
2,165.172,rs2652442,-0.002  
2,165.173,rs16838189,-0.002  
2,165.178,rs1838675,-0.002  
2,165.190,rs6744254,-0.002  
2,165.558,rs2691775,-0.001  
2,165.559,rs10180851,-0.001  
2,165.684,rs1980211,0.000  
2,165.764,rs1518284,0.000  
2,165.784,rs884799,0.000  
2,165.797,rs12471133,0.000  
2,165.828,rs1402071,0.000  
2,165.873,rs769353,0.000  
2,165.917,rs1949991,0.001  
2,165.967,rs12694513,0.001  
2,165.968,rs16839972,0.001  
2,166.003,rs10196668,0.002  
2,166.014,rs13011491,0.003  
2,166.132,rs16840135,0.001  
2,166.264,rs6721605,0.000  
2,166.364,rs16840461,0.000  
2,166.459,rs7575920,-0.000  
2,166.497,rs1543932,-0.002  
2,166.795,rs7355634,-0.002  
2,166.925,rs263305,-0.002  
2,167.013,rs1867846,-0.000  
2,167.083,rs198688,-0.000  
2,167.119,rs267993,-0.001  
2,167.198,rs4299296,-0.005  
2,167.226,rs4556933,-0.012  
2,167.245,rs1902032,-0.012  
2,167.276,rs2444770,-0.012  
2,167.334,rs6756623,-0.012  
2,167.434,rs10933443,-0.011

2,167.447,rs10497193,-0.012  
2,167.563,rs720159,-0.021  
2,167.597,rs4664236,-0.014  
2,167.604,rs13023991,-0.012  
2,167.654,rs6739665,-0.008  
2,167.660,rs6707705,-0.009  
2,167.666,rs17603277,-0.010  
2,167.715,rs1357182,-0.028  
2,167.718,rs956986,-0.029  
2,167.737,rs4233674,-0.042  
2,167.748,rs4664935,-0.041  
2,167.767,rs13413279,-0.040  
2,167.895,rs10190089,-0.046  
2,167.999,rs7576462,-0.093  
2,168.002,rs4665072,-0.064  
2,168.092,rs11693108,-0.066  
2,168.130,rs12466258,-0.066  
2,168.196,rs2729722,-0.067  
2,168.235,rs7601374,-0.066  
2,168.243,rs16844494,-0.066  
2,168.272,rs3792164,-0.068  
2,168.315,rs7598162,-0.069  
2,168.668,rs7423892,-0.096  
2,168.686,rs4664334,-0.093  
2,168.691,rs10192369,-0.093  
2,168.703,rs7598938,-0.092  
2,168.824,rs270996,-0.100  
2,168.863,rs1615929,-0.102  
2,168.876,rs1829975,-0.104  
2,169.016,rs7309,-0.139  
2,169.069,rs3769963,-0.142  
2,169.110,rs768835,-0.140  
2,169.139,rs17243975,-0.137  
2,169.243,rs2892769,-0.126  
2,169.369,rs2909448,-0.126  
2,169.413,rs2080712,-0.158  
2,169.429,rs1990761,-0.164  
2,169.435,rs3761656,-0.164  
2,169.487,rs1990760,-0.159  
2,169.525,rs17783344,-0.163  
2,170.063,rs11682423,-0.226  
2,170.270,rs1434999,-0.238  
2,170.271,rs1273201,-0.238  
2,170.285,rs1834220,-0.284  
2,170.297,rs1387588,-0.330  
2,170.303,rs6712770,-0.325  
2,170.309,rs1221518,-0.324  
2,170.314,rs13402758,-0.327  
2,170.321,rs10193051,-0.329  
2,170.322,rs6761831,-0.328  
2,170.326,rs12692697,-0.340  
2,170.327,rs1561606,-0.334  
2,170.328,rs2028406,-0.359  
2,170.329,rs13003002,-0.364  
2,170.334,rs10930109,-0.364  
2,170.335,rs728700,-0.364  
2,170.337,rs1031736,-0.358  
2,170.340,rs17810175,-0.347  
2,170.360,rs171985,-0.250  
2,170.369,rs1439210,-0.239  
2,170.371,rs9287843,-0.238

2,170.376,rs13033944,-0.226  
2,170.382,rs10192863,-0.210  
2,170.394,rs7568923,-0.251  
2,170.395,rs4130269,-0.252  
2,170.643,rs3769885,-0.319  
2,171.006,rs1355995,-0.411  
2,171.095,rs1020626,-0.422  
2,171.125,rs1007732,-0.429  
2,171.128,rs2034710,-0.429  
2,171.142,rs12467436,-0.420  
2,171.145,rs6720974,-0.418  
2,171.248,rs2288704,-0.362  
2,171.342,rs6735544,-0.386  
2,171.396,rs12473643,-0.399  
2,171.440,rs13402180,-0.407  
2,171.476,rs16852031,-0.408  
2,171.485,rs6738209,-0.408  
2,171.532,rs13411795,-0.426  
2,171.536,rs2049711,-0.428  
2,171.591,rs10183984,-0.480  
2,171.602,rs1447237,-0.486  
2,171.931,rs1473041,-0.431  
2,172.279,rs1479588,-0.449  
2,172.439,rs1159502,-0.509  
2,172.617,rs1897339,-0.558  
2,172.649,rs988843,-0.585  
2,172.655,rs986697,-0.591  
2,172.745,rs1226906,-0.643  
2,172.767,rs2390601,-0.630  
2,172.810,rs7605048,-0.663  
2,172.894,rs7585307,-0.715  
2,172.915,rs6433011,-0.723  
2,173.054,rs6734498,-0.733  
2,173.081,rs836709,-0.737  
2,173.236,rs6734516,-0.712  
2,173.291,rs7574351,-0.715  
2,173.387,rs6750247,-0.720  
2,173.408,rs4667556,-0.736  
2,173.492,rs1850440,-0.810  
2,173.505,rs3769382,-0.813  
2,173.613,rs950535,-0.840  
2,173.715,rs9646776,-0.801  
2,173.727,rs4629128,-0.757  
2,173.731,rs6714431,-0.756  
2,173.773,rs7597374,-0.830  
2,173.893,rs1377502,-0.839  
2,173.994,rs964987,-0.805  
2,174.031,rs1020603,-0.808  
2,174.244,rs10514622,-0.793  
2,174.246,rs2042549,-0.793  
2,174.256,rs918957,-0.797  
2,174.270,rs2161977,-0.805  
2,174.345,rs4668102,-0.830  
2,174.425,rs16855893,-0.877  
2,174.538,rs3821116,-0.885  
2,174.609,rs478333,-0.889  
2,174.669,rs3770582,-0.798  
2,174.674,rs17267869,-0.784  
2,174.695,rs3770590,-0.720  
2,174.777,rs10490134,-0.707  
2,174.865,rs10515932,-0.690

2,174.962,rs2268375,-0.617  
2,175.060,rs2302694,-0.644  
2,175.095,rs830956,-0.592  
2,175.126,rs830998,-0.608  
2,175.129,rs7568568,-0.605  
2,175.143,rs2161039,-0.567  
2,175.156,rs2673163,-0.572  
2,175.165,rs853988,-0.575  
2,175.187,rs861239,-0.570  
2,175.240,rs2389557,-0.581  
2,175.276,rs4667601,-0.596  
2,175.327,rs4616447,-0.612  
2,175.328,rs7591026,-0.584  
2,175.500,rs16857020,-0.587  
2,175.796,rs2288331,-0.584  
2,175.840,rs7590347,-0.587  
2,175.884,rs4668168,-0.580  
2,176.020,rs10803844,-0.547  
2,176.320,rs6725973,-0.557  
2,176.347,rs6731008,-0.560  
2,176.388,rs12474899,-0.577  
2,176.391,rs4667620,-0.578  
2,176.436,rs4667623,-0.592  
2,176.469,rs16857905,-0.599  
2,176.484,rs2355343,-0.602  
2,176.547,rs6748642,-0.596  
2,176.633,rs2355351,-0.591  
2,176.699,rs1364529,-0.572  
2,176.878,rs12611789,-0.588  
2,177.283,rs16858186,-0.630  
2,177.294,rs1356589,-0.631  
2,177.347,rs17426142,-0.663  
2,177.351,rs17426191,-0.664  
2,177.392,rs12692953,-0.677  
2,177.405,rs17580389,-0.664  
2,177.415,rs17271301,-0.655  
2,177.454,rs2355826,-0.651  
2,177.461,rs2883782,-0.656  
2,177.476,rs6734646,-0.659  
2,177.489,rs6724616,-0.692  
2,177.494,rs10191600,-0.711  
2,177.502,rs724529,-0.743  
2,177.531,rs7425766,-0.717  
2,177.545,rs2080401,-0.715  
2,177.558,rs2270336,-0.723  
2,177.644,rs6755814,-0.769  
2,177.685,rs4297845,-0.787  
2,177.931,rs7582822,-0.786  
2,178.046,rs13402901,-0.767  
2,178.068,rs3795996,-0.755  
2,178.163,rs11684782,-0.702  
2,178.197,rs6729179,-0.688  
2,178.231,rs4668394,-0.690  
2,178.310,rs1399956,-0.643  
2,178.334,rs979956,-0.629  
2,178.472,rs1607254,-0.614  
2,178.553,rs12692976,-0.615  
2,178.914,rs788158,-0.661  
2,178.929,rs788172,-0.675  
2,179.010,rs1386354,-0.657  
2,179.013,rs1486957,-0.656



2,179.033,rs3901602,-0.639  
2,179.096,rs11893372,-0.602  
2,179.141,rs10930538,-0.579  
2,179.167,rs7574002,-0.558  
2,179.212,rs12471128,-0.526  
2,179.329,rs4283388,-0.518  
2,179.367,rs10930554,-0.519  
2,179.400,rs2141698,-0.517  
2,179.407,rs3108779,-0.481  
2,179.442,rs6755175,-0.467  
2,179.549,rs13012170,-0.423  
2,179.575,rs12151618,-0.414  
2,179.723,rs836610,-0.372  
2,179.736,rs13024014,-0.371  
2,179.812,rs836593,-0.363  
2,179.865,rs2081406,-0.357  
2,179.893,rs17754945,-0.354  
2,179.977,rs7581330,-0.353  
2,180.084,rs2553011,-0.366  
2,180.091,rs2113807,-0.365  
2,180.135,rs11695769,-0.363  
2,180.163,rs3769245,-0.406  
2,180.172,rs1867942,-0.420  
2,180.246,rs2305462,-0.508  
2,180.255,rs6751505,-0.520  
2,180.273,rs3769210,-0.521  
2,180.411,rs3769185,-0.503  
2,180.564,rs820007,-0.552  
2,180.573,rs10497398,-0.555  
2,180.580,rs13031154,-0.558  
2,180.590,rs1442973,-0.558  
2,180.595,rs820042,-0.558  
2,180.609,rs868294,-0.558  
2,180.712,rs11078,-0.539  
2,180.755,rs11689493,-0.496  
2,180.766,rs1865236,-0.483  
2,180.772,rs6433406,-0.517  
2,180.789,rs7567442,-0.489  
2,180.822,rs1865651,-0.437  
2,180.863,rs12473093,-0.423  
2,180.865,rs1433681,-0.421  
2,181.002,rs546613,-0.316  
2,181.053,rs730912,-0.320  
2,181.061,rs2358235,-0.321  
2,181.065,rs544938,-0.319  
2,181.109,rs821147,-0.254  
2,181.166,rs752280,-0.258  
2,181.232,rs6433435,-0.253  
2,181.256,rs16823294,-0.250  
2,181.361,rs7421996,-0.235  
2,181.396,rs7591669,-0.219  
2,181.438,rs4972613,-0.243  
2,181.468,rs4972618,-0.251  
2,181.573,rs6721460,-0.239  
2,181.592,rs935398,-0.236  
2,181.665,rs6433461,-0.185  
2,181.677,rs6756828,-0.180  
2,181.968,rs4350713,-0.182  
2,182.019,rs17320820,-0.230  
2,182.038,rs17255455,-0.239  
2,182.059,rs1450043,-0.234

2,182.064,rs10221679,-0.233  
2,182.090,rs1430182,-0.224  
2,182.091,rs7558523,-0.225  
2,182.115,rs6738929,-0.249  
2,182.119,rs10497426,-0.213  
2,182.124,rs7575145,-0.170  
2,182.153,rs10497431,-0.177  
2,182.158,rs1378729,-0.179  
2,182.455,rs1982235,-0.119  
2,183.122,rs7565836,-0.108  
2,183.132,rs7592980,-0.107  
2,183.230,rs13017316,-0.111  
2,183.271,rs10497444,-0.113  
2,183.303,rs6754856,-0.115  
2,183.358,rs1012357,-0.132  
2,183.365,rs1374369,-0.134  
2,183.388,rs12693085,-0.137  
2,183.403,rs6433564,-0.142  
2,183.412,rs6709287,-0.143  
2,183.636,rs847175,-0.164  
2,183.676,rs12474905,-0.154  
2,183.691,rs847153,-0.151  
2,183.740,rs2113563,-0.140  
2,183.753,rs6736786,-0.140  
2,183.851,rs2140538,-0.133  
2,183.871,rs3850167,-0.132  
2,184.026,rs818361,-0.090  
2,184.093,rs7604433,-0.110  
2,184.188,rs1554406,-0.151  
2,184.215,rs6433594,-0.162  
2,184.235,rs2122013,-0.123  
2,184.265,rs13387510,-0.115  
2,184.284,rs1037222,-0.116  
2,184.302,rs6721218,-0.118  
2,184.390,rs2922309,-0.129  
2,184.443,rs6433602,-0.126  
2,184.508,rs4407280,-0.123  
2,184.516,rs7422957,-0.120  
2,184.589,rs6705679,-0.092  
2,184.665,rs13032587,-0.097  
2,184.705,rs6723196,-0.101  
2,184.780,rs6433620,-0.100  
2,184.829,rs1370539,-0.100  
2,184.840,rs11691671,-0.099  
2,184.936,rs9287995,-0.099  
2,184.970,rs1529093,-0.092  
2,185.006,rs10497466,-0.071  
2,185.232,rs6726395,-0.068  
2,185.246,rs1962142,-0.066  
2,185.300,rs13002088,-0.083  
2,185.301,rs2303537,-0.083  
2,185.441,rs2291302,-0.104  
2,185.467,rs2366913,-0.108  
2,185.533,rs10497528,-0.113  
2,185.571,rs7581299,-0.134  
2,185.650,rs12693178,-0.143  
2,185.692,rs10179379,-0.124  
2,185.705,rs7558234,-0.147  
2,185.709,rs6735828,-0.164  
2,185.712,rs10497537,-0.158  
2,185.722,rs6726305,-0.137

2,185.724,rs10930865,-0.124  
2,185.727,rs7608378,-0.106  
2,185.728,rs4894095,-0.100  
2,185.731,rs6433781,-0.100  
2,185.736,rs12328936,-0.098  
2,185.740,rs7586173,-0.102  
2,185.756,rs6713554,-0.100  
2,185.776,rs10930874,-0.097  
2,185.780,rs6757845,-0.097  
2,185.792,rs1028179,-0.098  
2,185.801,rs17747577,-0.098  
2,185.813,rs10210118,-0.099  
2,185.822,rs6715297,-0.107  
2,185.836,rs6433796,-0.123  
2,185.876,rs3112943,-0.110  
2,185.896,rs17822210,-0.105  
2,185.899,rs7590028,-0.105  
2,185.941,rs1486239,-0.094  
2,185.958,rs357708,-0.110  
2,185.966,rs11680455,-0.114  
2,185.982,rs12328338,-0.108  
2,185.998,rs259839,-0.123  
2,186.018,rs260059,-0.125  
2,186.100,rs4125973,-0.140  
2,186.125,rs10497560,-0.143  
2,186.171,rs10497563,-0.146  
2,186.181,rs16867270,-0.139  
2,186.241,rs7589013,-0.137  
2,186.268,rs1823790,-0.137  
2,186.287,rs7606036,-0.110  
2,186.366,rs1477499,-0.096  
2,186.387,rs918959,-0.089  
2,186.402,rs3845691,-0.085  
2,186.452,rs10930936,-0.097  
2,186.455,rs10497572,-0.098  
2,186.506,rs12619437,-0.117  
2,186.526,rs10209813,-0.116  
2,186.531,rs4331462,-0.116  
2,186.810,rs7599846,-0.107  
2,186.886,rs10497576,-0.106  
2,186.940,rs10206405,-0.105  
2,187.061,rs7602460,-0.098  
2,187.063,rs831864,-0.099  
2,187.119,rs6740847,-0.127  
2,187.261,rs10490689,-0.176  
2,187.379,rs4018755,-0.184  
2,187.429,rs2950648,-0.180  
2,187.466,rs1441159,-0.182  
2,187.676,rs1157595,-0.189  
2,187.701,rs11695458,-0.184  
2,187.775,rs7594388,-0.167  
2,187.832,rs4404233,-0.177  
2,187.927,rs1432515,-0.192  
2,188.021,rs2118484,-0.182  
2,188.096,rs2195611,-0.218  
2,188.101,rs10931010,-0.218  
2,188.197,rs2082136,-0.223  
2,188.366,rs17356755,-0.242  
2,188.435,rs10931040,-0.256  
2,188.459,rs7593100,-0.217  
2,188.465,rs288324,-0.209

2,188.541,rs9333280,-0.210  
2,188.738,rs2675058,-0.212  
2,188.796,rs17706149,-0.211  
2,188.868,rs6740639,-0.209  
2,188.897,rs17758692,-0.204  
2,188.991,rs1972947,-0.227  
2,189.006,rs7559989,-0.249  
2,189.049,rs10497616,-0.298  
2,189.056,rs6434026,-0.310  
2,189.068,rs2368443,-0.268  
2,189.071,rs9288091,-0.270  
2,189.080,rs2368446,-0.251  
2,189.102,rs12693351,-0.282  
2,189.134,rs2119047,-0.316  
2,189.261,rs719736,-0.300  
2,189.272,rs1372949,-0.301  
2,189.293,rs6751688,-0.329  
2,189.394,rs1366840,-0.312  
2,189.457,rs11683056,-0.299  
2,189.476,rs850882,-0.301  
2,189.482,rs17403192,-0.308  
2,189.529,rs2193615,-0.326  
2,189.566,rs10931206,-0.289  
2,189.671,rs13397032,-0.299  
2,189.683,rs3911239,-0.310  
2,189.705,rs930657,-0.342  
2,189.711,rs2370708,-0.326  
2,189.715,rs2887833,-0.314  
2,189.863,rs7601254,-0.383  
2,189.900,rs10153820,-0.391  
2,189.960,rs4667193,-0.394  
2,190.011,rs1317323,-0.383  
2,190.016,rs10170218,-0.383  
2,190.036,rs10497689,-0.375  
2,190.055,rs16829731,-0.368  
2,190.126,rs13008931,-0.340  
2,190.131,rs9288155,-0.340  
2,190.206,rs16830208,-0.346  
2,190.287,rs1878204,-0.352  
2,190.298,rs11686968,-0.331  
2,190.299,rs17357652,-0.332  
2,190.318,rs3106796,-0.336  
2,190.411,rs4667274,-0.280  
2,190.501,rs10194053,-0.302  
2,190.534,rs17271148,-0.309  
2,190.555,rs2352267,-0.314  
2,190.577,rs7568054,-0.321  
2,190.692,rs256546,-0.337  
2,190.779,rs785247,-0.266  
2,190.783,rs785237,-0.263  
2,190.810,rs2562817,-0.253  
2,190.822,rs785248,-0.248  
2,190.827,rs785209,-0.244  
2,190.888,rs2664253,-0.191  
2,190.909,rs291467,-0.187  
2,190.939,rs1866852,-0.182  
2,191.111,rs13392968,-0.184  
2,191.638,rs1263128,-0.202  
2,192.188,rs3771300,-0.219  
2,192.313,rs6740131,-0.199  
2,192.410,rs1517352,-0.183

2,192.604,rs7572482,-0.152  
2,192.770,rs6728759,-0.106  
2,192.835,rs6713885,-0.086  
2,192.896,rs6737786,-0.070  
2,193.227,rs3935827,-0.064  
2,193.914,rs4386269,-0.062  
2,194.387,rs1838821,-0.057  
2,194.403,rs2357135,-0.049  
2,194.408,rs10931548,-0.046  
2,194.412,rs10173564,-0.045  
2,194.414,rs2357149,-0.045  
2,194.417,rs1484900,-0.045  
2,194.442,rs1439664,-0.045  
2,194.467,rs2218495,-0.045  
2,194.482,rs4547545,-0.048  
2,194.526,rs7589368,-0.039  
2,194.548,rs6713417,-0.048  
2,194.569,rs17585833,-0.050  
2,194.596,rs10209427,-0.056  
2,194.619,rs7600163,-0.070  
2,194.630,rs1607345,-0.079  
2,194.667,rs2360101,-0.102  
2,194.682,rs16831761,-0.100  
2,194.691,rs1528003,-0.100  
2,194.957,rs801340,-0.094  
2,195.006,rs765677,-0.093  
2,195.182,rs2217471,-0.089  
2,195.210,rs6731550,-0.084  
2,195.286,rs1606127,-0.052  
2,195.290,rs1849067,-0.050  
2,195.291,rs2667160,-0.063  
2,195.411,rs985978,-0.061  
2,195.497,rs777289,-0.049  
2,195.608,rs1524035,-0.041  
2,195.634,rs6731123,-0.039  
2,195.654,rs7559362,-0.038  
2,195.807,rs10931700,-0.038  
2,195.966,rs1026628,-0.040  
2,196.010,rs12613279,-0.036  
2,196.261,rs6434859,-0.015  
2,196.283,rs10497786,-0.014  
2,196.510,rs6434873,-0.014  
2,196.575,rs1064213,-0.012  
2,196.635,rs11681576,-0.018  
2,196.733,rs714644,-0.020  
2,196.979,rs1379020,-0.032  
2,196.993,rs1456550,-0.032  
2,197.192,rs12477557,-0.046  
2,197.230,rs2215023,-0.050  
2,197.597,rs16830242,-0.065  
2,197.606,rs12477961,-0.067  
2,197.610,rs10199690,-0.066  
2,197.660,rs2048968,-0.061  
2,197.678,rs13035389,-0.060  
2,197.695,rs1518095,-0.075  
2,197.756,rs11901699,-0.079  
2,197.770,rs13012540,-0.081  
2,197.785,rs2881208,-0.085  
2,197.879,rs12611872,-0.086  
2,197.881,rs12615435,-0.086  
2,197.911,rs10931878,-0.080

2,197.945,rs17628965,-0.072  
2,197.947,rs2577850,-0.072  
2,198.354,rs1729413,-0.068  
2,198.417,rs1835720,-0.069  
2,198.588,rs1561296,-0.071  
2,198.593,rs1370558,-0.071  
2,198.599,rs3769439,-0.071  
2,198.632,rs13019534,-0.071  
2,198.640,rs713396,-0.074  
2,198.650,rs10084263,-0.098  
2,198.677,rs4674449,-0.130  
2,199.025,rs3769825,-0.176  
2,199.041,rs2293554,-0.178  
2,199.237,rs11694706,-0.202  
2,199.561,rs2676325,-0.244  
2,199.601,rs11894115,-0.238  
2,199.667,rs10931967,-0.212  
2,199.688,rs1208083,-0.210  
2,199.712,rs1914267,-0.236  
2,199.755,rs970595,-0.284  
2,199.821,rs2882324,-0.344  
2,199.859,rs12472067,-0.351  
2,199.907,rs6725131,-0.319  
2,199.930,rs10210937,-0.266  
2,199.947,rs6722215,-0.304  
2,199.952,rs7571877,-0.311  
2,200.055,rs1521880,-0.305  
2,200.084,rs6748072,-0.293  
2,200.167,rs13015146,-0.296  
2,200.463,rs6751210,-0.341  
2,200.564,rs17807135,-0.347  
2,200.612,rs17406900,-0.382  
2,200.635,rs1864466,-0.382  
2,200.809,rs10176600,-0.388  
2,200.821,rs13013366,-0.375  
2,200.873,rs10932017,-0.313  
2,200.930,rs1018361,-0.291  
2,201.004,rs733618,-0.277  
2,201.047,rs6748358,-0.268  
2,201.057,rs10197319,-0.270  
2,201.171,rs1896286,-0.271  
2,201.236,rs3096735,-0.268  
2,201.256,rs3096734,-0.268  
2,201.430,rs1344637,-0.275  
2,201.485,rs7580465,-0.257  
2,201.501,rs4419220,-0.258  
2,201.508,rs4673287,-0.258  
2,201.552,rs6714929,-0.293  
2,201.625,rs4675431,-0.428  
2,201.651,rs4673291,-0.436  
2,201.682,rs723021,-0.449  
2,201.823,rs6435232,-0.534  
2,201.857,rs4132730,-0.554  
2,201.905,rs6435238,-0.614  
2,202.047,rs6743255,-0.655  
2,202.088,rs4675467,-0.654  
2,202.419,rs16836582,-0.598  
2,202.577,rs6733159,-0.576  
2,202.694,rs6435265,-0.539  
2,202.697,rs236830,-0.538  
2,202.875,rs4675490,-0.428

2,202.913,rs2289025,-0.429  
2,203.040,rs10932099,-0.442  
2,203.122,rs11682188,-0.459  
2,203.277,rs10490292,-0.491  
2,203.452,rs4675528,-0.544  
2,203.621,rs1079943,-0.517  
2,203.679,rs759455,-0.523  
2,203.698,rs849511,-0.496  
2,203.699,rs10932122,-0.496  
2,203.799,rs861079,-0.526  
2,203.809,rs849523,-0.488  
2,203.832,rs1996412,-0.543  
2,203.847,rs10180293,-0.506  
2,203.885,rs3770996,-0.443  
2,203.892,rs1990708,-0.442  
2,203.911,rs10932127,-0.443  
2,203.913,rs2041915,-0.408  
2,203.943,rs10182735,-0.410  
2,204.005,rs1861619,-0.395  
2,204.048,rs4673340,-0.472  
2,204.052,rs7562683,-0.444  
2,204.053,rs4675571,-0.445  
2,204.213,rs3732083,-0.420  
2,204.248,rs4675602,-0.407  
2,204.283,rs4675612,-0.424  
2,204.408,rs2300965,-0.456  
2,204.416,rs759845,-0.458  
2,204.531,rs10932158,-0.521  
2,204.536,rs4673360,-0.523  
2,204.584,rs10490746,-0.522  
2,204.598,rs16838621,-0.522  
2,204.615,rs1001110,-0.518  
2,204.751,rs7581388,-0.432  
2,204.767,rs2042135,-0.413  
2,204.792,rs6728532,-0.380  
2,204.872,rs7563853,-0.365  
2,204.873,rs2080711,-0.365  
2,204.874,rs6732038,-0.364  
2,204.886,rs764487,-0.355  
2,204.917,rs6435369,-0.332  
2,204.918,rs716630,-0.331  
2,204.920,rs6739693,-0.329  
2,204.922,rs2072570,-0.327  
2,204.925,rs6732962,-0.332  
2,204.939,rs2194374,-0.357  
2,204.940,rs6435370,-0.357  
2,204.962,rs4675672,-0.355  
2,205.004,rs2709376,-0.351  
2,205.038,rs7591784,-0.348  
2,205.060,rs9646834,-0.344  
2,205.094,rs2663867,-0.339  
2,205.109,rs2663887,-0.339  
2,205.198,rs4675713,-0.332  
2,205.207,rs10188753,-0.358  
2,205.289,rs17537169,-0.284  
2,205.359,rs2621472,-0.288  
2,205.423,rs6435401,-0.297  
2,205.577,rs896637,-0.315  
2,205.640,rs796283,-0.244  
2,205.641,rs2854711,-0.244  
2,205.679,rs6738940,-0.222

2,205.716,rs13387151,-0.224  
2,205.767,rs3769521,-0.228  
2,205.914,rs4675764,-0.237  
2,206.194,rs6435467,-0.251  
2,206.195,rs1377908,-0.251  
2,206.245,rs13020347,-0.251  
2,206.294,rs1921735,-0.218  
2,206.338,rs10202412,-0.216  
2,206.470,rs10183434,-0.215  
2,206.498,rs4417658,-0.197  
2,206.523,rs2370833,-0.211  
2,206.632,rs7584375,-0.236  
2,206.890,rs10932321,-0.296  
2,206.900,rs2048277,-0.295  
2,207.048,rs10932334,-0.320  
2,207.118,rs10515951,-0.327  
2,207.169,rs12468557,-0.336  
2,207.190,rs2287598,-0.339  
2,207.196,rs12997383,-0.339  
2,207.295,rs10195020,-0.339  
2,207.360,rs6726552,-0.361  
2,207.463,rs7567073,-0.421  
2,207.488,rs191180,-0.424  
2,207.537,rs1469926,-0.416  
2,207.692,rs2371172,-0.435  
2,207.764,rs10209471,-0.428  
2,207.772,rs13007747,-0.464  
2,207.948,rs16846161,-0.459  
2,207.955,rs10165449,-0.458  
2,207.968,rs17747388,-0.459  
2,208.051,rs6725395,-0.512  
2,208.054,rs16846352,-0.507  
2,208.055,rs6435632,-0.506  
2,208.093,rs6747637,-0.469  
2,208.097,rs10932384,-0.483  
2,208.100,rs11895509,-0.480  
2,208.107,rs10497945,-0.427  
2,208.133,rs17335169,-0.399  
2,208.206,rs10497948,-0.319  
2,208.257,rs6725181,-0.285  
2,208.290,rs2371276,-0.274  
2,208.303,rs6435659,-0.249  
2,208.319,rs6745717,-0.256  
2,208.386,rs10932398,-0.275  
2,208.417,rs7588431,-0.299  
2,208.443,rs4672626,-0.303  
2,208.481,rs714393,-0.305  
2,208.569,rs16847171,-0.332  
2,208.606,rs7598440,-0.340  
2,208.905,rs6715314,-0.318  
2,208.925,rs1402766,-0.316  
2,208.938,rs10497961,-0.316  
2,208.952,rs6755027,-0.315  
2,208.998,rs1915748,-0.304  
2,209.063,rs2135161,-0.288  
2,209.125,rs1910866,-0.274  
2,209.285,rs6435721,-0.300  
2,209.291,rs11674822,-0.283  
2,209.296,rs7580519,-0.269  
2,209.299,rs6731231,-0.296  
2,209.320,rs17332777,-0.291



2,209.465,rs6435735,-0.259  
2,209.568,rs6715589,-0.247  
2,209.606,rs16849449,-0.252  
2,209.607,rs11893132,-0.252  
2,209.612,rs4672667,-0.252  
2,209.689,rs7577413,-0.276  
2,209.805,rs1530239,-0.290  
2,209.862,rs920525,-0.296  
2,209.900,rs3768788,-0.299  
2,209.945,rs7571939,-0.299  
2,210.083,rs2708175,-0.309  
2,210.463,rs13007000,-0.298  
2,210.706,rs11675561,-0.308  
2,210.741,rs1397354,-0.275  
2,210.894,rs7581545,-0.261  
2,210.932,rs13007666,-0.277  
2,211.056,rs1912169,-0.328  
2,211.100,rs1912190,-0.339  
2,211.167,rs4585026,-0.354  
2,211.172,rs3924563,-0.354  
2,211.297,rs4673851,-0.363  
2,211.326,rs10932543,-0.362  
2,211.450,rs4672722,-0.361  
2,211.522,rs6720448,-0.351  
2,211.523,rs7586962,-0.351  
2,211.577,rs10498020,-0.343  
2,211.613,rs16852755,-0.335  
2,211.765,rs4672731,-0.344  
2,211.857,rs4533467,-0.349  
2,211.917,rs10171715,-0.349  
2,211.936,rs2030628,-0.350  
2,211.952,rs16853324,-0.350  
2,212.056,rs7419736,-0.351  
2,212.150,rs4531931,-0.349  
2,212.182,rs4673981,-0.457  
2,212.196,rs10498034,-0.421  
2,212.199,rs1464864,-0.422  
2,212.367,rs7604984,-0.420  
2,212.799,rs12694364,-0.403  
2,213.196,rs13034471,-0.364  
2,213.200,rs11890356,-0.364  
2,213.307,rs1898716,-0.369  
2,213.398,rs2678272,-0.366  
2,213.531,rs2678289,-0.413  
2,213.568,rs6744457,-0.430  
2,213.645,rs12992226,-0.522  
2,213.667,rs4674024,-0.529  
2,213.808,rs12694376,-0.515  
2,213.838,rs6704859,-0.572  
2,213.849,rs10932631,-0.577  
2,213.868,rs4674039,-0.540  
2,213.883,rs6740786,-0.559  
2,213.890,rs1344695,-0.573  
2,213.901,rs10211101,-0.577  
2,213.909,rs3770530,-0.545  
2,213.940,rs3770545,-0.538  
2,213.952,rs3770546,-0.530  
2,213.955,rs11676895,-0.528  
2,213.958,rs3755155,-0.527  
2,213.960,rs3770560,-0.527  
2,213.966,rs3770564,-0.529

2,214.040,rs16855357,-0.541  
2,214.122,rs828704,-0.553  
2,214.190,rs207946,-0.552  
2,214.293,rs207873,-0.600  
2,214.323,rs2544066,-0.598  
2,214.366,rs16855901,-0.579  
2,214.397,rs6756590,-0.564  
2,214.400,rs12467575,-0.561  
2,214.443,rs4672798,-0.530  
2,214.469,rs784548,-0.482  
2,214.594,rs3755140,-0.524  
2,214.647,rs4550645,-0.541  
2,214.714,rs4234019,-0.531  
2,214.722,rs7590938,-0.529  
2,214.760,rs1525608,-0.605  
2,214.774,rs2372848,-0.594  
2,214.812,rs2067041,-0.562  
2,214.833,rs7420849,-0.504  
2,214.843,rs3770472,-0.507  
2,214.890,rs2372868,-0.540  
2,215.312,rs2712163,-0.556  
2,215.639,rs1179726,-0.565  
2,215.645,rs2241191,-0.566  
2,215.729,rs2705592,-0.564  
2,215.787,rs1882421,-0.630  
2,215.794,rs2705594,-0.637  
2,215.829,rs10171745,-0.640  
2,215.856,rs13387042,-0.641  
2,215.904,rs7579306,-0.675  
2,215.913,rs6739040,-0.686  
2,215.941,rs13015994,-0.716  
2,215.944,rs6723845,-0.715  
2,215.948,rs12466929,-0.717  
2,216.001,rs1864444,-0.729  
2,216.010,rs2195610,-0.766  
2,216.358,rs2373067,-0.695  
2,216.488,rs16857774,-0.658  
2,216.694,rs7596630,-0.597  
2,217.059,rs2052928,-0.542  
2,217.119,rs4674213,-0.531  
2,217.128,rs3747,-0.533  
2,217.165,rs2552527,-0.497  
2,217.173,rs6729308,-0.504  
2,217.205,rs3791978,-0.533  
2,217.266,rs3791938,-0.538  
2,217.310,rs890051,-0.517  
2,217.328,rs3791911,-0.517  
2,217.355,rs6753621,-0.498  
2,217.463,rs876961,-0.494  
2,217.554,rs4672869,-0.462  
2,217.559,rs6436025,-0.461  
2,217.752,rs10206984,-0.460  
2,218.039,rs3731863,-0.354  
2,218.051,rs1059823,-0.350  
2,218.420,rs12989189,-0.309  
2,218.690,rs4674345,-0.278  
2,218.765,rs751135,-0.292  
2,218.915,rs7581721,-0.279  
2,218.934,rs359980,-0.277  
2,218.988,rs371825,-0.275  
2,219.571,rs1043160,-0.271

2,220.125,rs7596956,-0.260  
2,220.357,rs6436140,-0.254  
2,220.565,rs6717249,-0.247  
2,220.769,rs1058261,-0.238  
2,220.917,rs10932806,-0.225  
2,221.247,rs746233,-0.200  
2,221.360,rs7588807,-0.169  
2,221.362,rs684428,-0.131  
2,221.398,rs678134,-0.077  
2,221.402,rs7569439,-0.075  
2,221.404,rs10498067,-0.088  
2,221.406,rs6733609,-0.086  
2,221.423,rs12476246,-0.069  
2,221.432,rs6749528,-0.067  
2,221.438,rs17575566,-0.066  
2,221.452,rs16860370,-0.077  
2,221.459,rs7590480,-0.078  
2,221.460,rs7557937,-0.092  
2,221.470,rs12694490,-0.086  
2,221.488,rs17288469,-0.088  
2,221.492,rs750764,-0.103  
2,221.519,rs2385844,-0.079  
2,221.530,rs995842,-0.067  
2,221.540,rs6756097,-0.051  
2,221.608,rs13383613,-0.043  
2,221.628,rs12694510,-0.042  
2,221.646,rs10932835,-0.040  
2,222.068,rs6747324,-0.057  
2,222.120,rs4143572,-0.061  
2,222.264,rs2068114,-0.077  
2,222.290,rs4549077,-0.079  
2,222.386,rs4611634,-0.075  
2,222.449,rs1922772,-0.074  
2,222.539,rs1955401,-0.073  
2,222.597,rs2392716,-0.072  
2,222.655,rs1796432,-0.072  
2,222.764,rs6719602,-0.097  
2,222.957,rs16861659,-0.086  
2,223.119,rs10183570,-0.076  
2,223.189,rs2893611,-0.077  
2,223.260,rs4674556,-0.063  
2,223.297,rs1463991,-0.071  
2,223.742,rs634813,-0.036  
2,223.746,rs630054,-0.034  
2,223.748,rs617222,-0.033  
2,223.759,rs1550068,-0.027  
2,224.042,rs1369327,-0.031  
2,224.150,rs2019083,-0.020  
2,224.177,rs7603664,-0.024  
2,224.230,rs7559847,-0.019  
2,224.389,rs1991736,-0.019  
2,224.390,rs4359642,-0.019  
2,224.448,rs1346801,-0.020  
2,224.511,rs6737417,-0.017  
2,224.662,rs2303901,-0.011  
2,224.837,rs2710508,-0.016  
2,224.878,rs10498118,-0.017  
2,224.908,rs2680835,-0.018  
2,224.917,rs10804299,-0.012  
2,225.030,rs13414424,-0.005  
2,225.058,rs10210217,-0.003

2,225.131,rs824921,-0.001  
2,225.184,rs889838,-0.000  
2,225.213,rs6738997,0.000  
2,225.246,rs6738615,-0.000  
2,225.285,rs348980,-0.003  
2,225.296,rs13389057,-0.002  
2,225.328,rs16863360,-0.000  
2,225.334,rs6728176,-0.000  
2,225.340,rs10932941,-0.000  
2,225.406,rs6710838,-0.000  
2,225.520,rs6436304,0.001  
2,225.521,rs1367415,0.001  
2,225.522,rs11695486,0.002  
2,225.592,rs930140,0.003  
2,225.627,rs6436310,0.002  
2,225.777,rs4673017,0.002  
2,225.921,rs7604173,0.002  
2,225.935,rs735678,0.001  
2,225.958,rs2033694,-0.000  
2,225.974,rs17562982,-0.000  
2,226.200,rs4674677,0.006  
2,226.225,rs6710583,0.009  
2,226.253,rs10173147,0.020  
2,226.259,rs2084288,0.021  
2,226.264,rs6723091,0.021  
2,226.296,rs959327,0.024  
2,226.394,rs6751670,0.021  
2,226.453,rs12105595,0.022  
2,226.533,rs6436364,0.022  
2,226.583,rs1440063,0.032  
2,226.869,rs2203733,0.023  
2,226.968,rs1517628,0.026  
2,227.030,rs1517641,0.030  
2,227.066,rs2395982,0.039  
2,227.079,rs2395983,0.047  
2,227.119,rs16864788,0.054  
2,227.182,rs1371549,0.062  
2,227.226,rs2894511,0.067  
2,227.233,rs13402129,0.069  
2,227.298,rs4673070,0.082  
2,227.322,rs893451,0.099  
2,227.332,rs7589996,0.104  
2,227.354,rs582758,0.099  
2,227.463,rs7564664,0.076  
2,227.477,rs6740877,0.076  
2,227.587,rs6738983,0.076  
2,227.600,rs7590948,0.070  
2,227.681,rs13016085,0.104  
2,227.884,rs2098533,0.114  
2,227.913,rs12623539,0.122  
2,227.955,rs10170836,0.133  
2,228.015,rs1568751,0.151  
2,228.025,rs4674908,0.154  
2,228.036,rs16866004,0.155  
2,228.375,rs6717108,0.174  
2,228.530,rs6436508,0.122  
2,228.564,rs4674940,0.116  
2,228.590,rs11693393,0.115  
2,228.613,rs7605551,0.116  
2,228.638,rs12052387,0.117  
2,228.680,rs7558808,0.125

2,228.724,rs6436519,0.123  
2,228.731,rs10498177,0.121  
2,228.740,rs281525,0.118  
2,228.797,rs10172797,0.110  
2,228.852,rs7568255,0.108  
2,228.855,rs16866521,0.108  
2,228.909,rs2165927,0.109  
2,228.984,rs12467977,0.095  
2,228.986,rs6728230,0.094  
2,229.021,rs6743368,0.077  
2,229.049,rs6436551,0.070  
2,229.081,rs1897229,0.071  
2,229.088,rs10804326,0.072  
2,229.099,rs1993323,0.067  
2,229.126,rs10187044,0.057  
2,229.132,rs974412,0.055  
2,229.138,rs9288611,0.085  
2,229.157,rs1190116,0.084  
2,229.243,rs13428728,0.087  
2,229.297,rs16866816,0.088  
2,229.532,rs2713538,0.106  
2,229.556,rs6436607,0.107  
2,229.606,rs2396306,0.108  
2,229.631,rs2396328,0.108  
2,229.760,rs4600636,0.095  
2,229.848,rs13392647,0.085  
2,229.911,rs11674718,0.084  
2,230.159,rs876496,0.085  
2,230.452,rs2707537,0.105  
2,230.477,rs1922529,0.102  
2,230.491,rs10427370,0.078  
2,230.494,rs1922531,0.073  
2,230.539,rs6725330,0.070  
2,230.548,rs10933155,0.071  
2,230.660,rs7574757,0.050  
2,230.667,rs7558081,0.049  
2,230.668,rs6758296,0.048  
2,230.697,rs11675161,0.027  
2,230.747,rs2396453,0.023  
2,230.767,rs10498217,0.021  
2,230.802,rs1922021,0.017  
2,230.825,rs6735744,0.018  
2,230.861,rs2204862,0.023  
2,230.870,rs6436661,0.025  
2,230.873,rs4325745,0.025  
2,230.931,rs6436664,0.037  
2,230.948,rs13028299,0.037  
2,231.235,rs7560053,0.063  
2,231.292,rs4234072,0.061  
2,231.297,rs11686056,0.061  
2,231.340,rs6749521,0.061  
2,231.384,rs4673194,0.059  
2,231.718,rs4129709,0.076  
2,231.800,rs2176189,0.088  
2,231.827,rs10933198,0.097  
2,231.872,rs4973161,0.119  
2,231.892,rs10204702,0.138  
2,231.903,rs6436723,0.137  
2,231.906,rs12469987,0.137  
2,231.908,rs6730730,0.138  
2,231.909,rs7568490,0.133

2,231.912,rs2396465,0.122  
2,231.961,rs7585777,0.132  
2,232.005,rs7567984,0.134  
2,232.027,rs7585481,0.123  
2,232.046,rs2396492,0.121  
2,232.054,rs4973237,0.120  
2,232.093,rs11673884,0.125  
2,232.103,rs4972941,0.122  
2,232.111,rs7595272,0.115  
2,232.162,rs12994381,0.109  
2,232.163,rs11886482,0.109  
2,232.194,rs7340134,0.124  
2,232.266,rs940339,0.128  
2,232.280,rs950817,0.130  
2,232.419,rs16824126,0.136  
2,232.482,rs1721355,0.138  
2,232.563,rs1715826,0.143  
2,232.664,rs11680053,0.160  
2,232.706,rs3811514,0.159  
2,232.964,rs6436755,0.137  
2,233.050,rs7570716,0.131  
2,233.357,rs1528218,0.111  
2,233.390,rs13021389,0.109  
2,233.458,rs929925,0.092  
2,233.616,rs7573585,0.099  
2,233.634,rs6738261,0.101  
2,233.644,rs10933256,0.103  
2,234.125,rs9288639,0.196  
2,234.149,rs2396595,0.202  
2,234.196,rs10203445,0.204  
2,234.227,rs7559725,0.204  
2,234.233,rs1544688,0.204  
2,234.250,rs7594377,0.201  
2,234.261,rs2109818,0.196  
2,234.263,rs2215598,0.195  
2,234.272,rs13034774,0.191  
2,234.295,rs2396611,0.186  
2,234.306,rs990672,0.185  
2,234.319,rs17676036,0.183  
2,234.355,rs3845826,0.185  
2,234.548,rs4973171,0.233  
2,234.718,rs883731,0.238  
2,234.776,rs6747101,0.234  
2,234.818,rs1227003,0.230  
2,234.943,rs4973184,0.222  
2,235.060,rs4973190,0.229  
2,235.069,rs9288645,0.228  
2,235.223,rs12694811,0.188  
2,235.276,rs12694814,0.180  
2,235.321,rs12620995,0.171  
2,235.330,rs7597072,0.169  
2,235.333,rs10187046,0.178  
2,235.341,rs10197959,0.200  
2,235.356,rs11695055,0.219  
2,235.369,rs7589154,0.232  
2,235.428,rs17581619,0.222  
2,235.458,rs10490186,0.223  
2,235.469,rs1861617,0.227  
2,235.502,rs12052464,0.207  
2,235.533,rs208789,0.253  
2,235.737,rs488007,0.252

2,236.164,rs13407773,0.236  
2,236.179,rs4973245,0.239  
2,236.209,rs4375854,0.233  
2,236.259,rs4613264,0.251  
2,236.264,rs10169375,0.252  
2,236.364,rs6436908,0.226  
2,236.422,rs4972939,0.212  
2,236.432,rs17327304,0.210  
2,236.443,rs6436915,0.209  
2,236.475,rs2114591,0.204  
2,236.530,rs3177554,0.205  
2,236.591,rs12477362,0.205  
2,236.687,rs3769845,0.212  
2,236.775,rs11896138,0.209  
2,236.864,rs12105723,0.207  
2,236.894,rs7590429,0.202  
2,236.946,rs9678342,0.203  
2,237.050,rs1649883,0.215  
2,237.066,rs3856529,0.217  
2,237.196,rs9288668,0.234  
2,237.208,rs1678192,0.239  
2,237.263,rs2288356,0.258  
2,237.286,rs6742549,0.267  
2,237.337,rs4972964,0.274  
2,237.380,rs4435442,0.279  
2,237.414,rs7590845,0.294  
2,237.478,rs13409720,0.326  
2,237.496,rs4973343,0.329  
2,237.772,rs881109,0.344  
2,237.795,rs7579281,0.348  
2,237.807,rs10182071,0.352  
2,237.828,rs2466150,0.356  
2,237.863,rs4972973,0.368  
2,237.969,rs3111780,0.453  
2,238.059,rs6757356,0.531  
2,238.066,rs3106301,0.499  
2,238.104,rs10933363,0.541  
2,238.109,rs6736980,0.545  
2,238.145,rs2175149,0.551  
2,238.253,rs4973377,0.581  
2,238.330,rs753855,0.612  
2,238.355,rs1729077,0.611  
2,238.399,rs2290275,0.618  
2,238.457,rs1729089,0.635  
2,238.509,rs10445829,0.645  
2,238.522,rs11890076,0.633  
2,238.538,rs10186875,0.617  
2,238.547,rs4973401,0.606  
2,238.572,rs4973410,0.597  
2,238.610,rs7580705,0.573  
2,238.635,rs12992677,0.562  
2,238.693,rs13384421,0.511  
2,238.696,rs2060413,0.510  
2,238.741,rs6710658,0.487  
2,238.762,rs4530357,0.505  
2,238.795,rs2070936,0.389  
2,238.798,rs838437,0.386  
2,238.980,rs2679184,0.386  
2,238.988,rs3107179,0.386  
2,239.096,rs3100612,0.357  
2,239.719,rs12996863,0.299

2,239.794,rs2678484,0.258  
2,239.827,rs12616972,0.248  
2,239.880,rs2697806,0.252  
2,239.921,rs2117770,0.167  
2,240.058,rs17296210,0.143  
2,240.080,rs7571133,0.163  
2,240.097,rs871688,0.156  
2,240.140,rs11550699,0.155  
2,240.397,rs10211596,0.076  
2,240.729,rs2004203,0.094  
2,240.843,rs10933421,0.086  
2,240.891,rs13383577,0.105  
2,240.892,rs3811589,0.105  
2,240.963,rs4257390,0.115  
2,240.984,rs7425956,0.117  
2,241.016,rs9750891,0.118  
2,241.025,rs7570061,0.118  
2,241.038,rs9288685,0.118  
2,241.051,rs10200271,0.120  
2,241.194,rs6720896,0.139  
2,241.224,rs3890760,0.141  
2,241.264,rs4663784,0.144  
2,241.265,rs3792117,0.143  
2,241.274,rs4663834,0.142  
2,241.285,rs7580869,0.148  
2,241.315,rs2341565,0.187  
2,241.326,rs10211468,0.219  
2,241.604,rs3792091,0.260  
2,241.841,rs2242102,0.355  
2,242.206,rs4129945,0.434  
2,242.388,rs7571337,0.458  
2,242.490,rs12988520,0.483  
2,242.512,rs4663325,0.479  
2,242.676,rs6717546,0.444  
2,242.722,rs10207194,0.453  
2,242.734,rs741160,0.457  
2,242.742,rs13018934,0.440  
2,242.754,rs6716168,0.431  
2,242.802,rs7606893,0.486  
2,242.873,rs2286430,0.508  
2,243.064,rs758277,0.487  
2,243.082,rs12473889,0.493  
2,243.142,rs11563212,0.510  
2,243.159,rs13401339,0.541  
2,243.179,rs13414162,0.570  
2,243.192,rs4663992,0.578  
2,243.221,rs11563056,0.611  
2,243.240,rs6723922,0.596  
2,243.290,rs1987842,0.639  
2,243.291,rs10084247,0.639  
2,243.292,rs17866592,0.639  
2,243.315,rs1395835,0.644  
2,243.320,rs17866606,0.643  
2,243.327,rs10190663,0.642  
2,243.450,rs250958,0.585  
2,243.554,rs250900,0.563  
2,243.566,rs1860700,0.560  
2,243.576,rs12617590,0.558  
2,243.793,rs10929015,0.472  
2,244.003,rs11695811,0.375  
2,244.083,rs772789,0.334



2,244.086,rs772788,0.332  
2,244.227,rs9784089,0.293  
2,244.236,rs2136261,0.292  
2,244.373,rs4663416,0.295  
2,244.390,rs11883650,0.295  
2,244.445,rs11900995,0.304  
2,244.466,rs3115360,0.417  
2,244.540,rs10803620,0.458  
2,244.652,rs940942,0.531  
2,244.690,rs7576760,0.547  
2,244.718,rs940947,0.544  
2,244.722,rs4663447,0.544  
2,244.736,rs10190832,0.531  
2,244.768,rs1880742,0.501  
2,245.022,rs4271722,0.490  
2,245.024,rs7607157,0.489  
2,245.043,rs2380262,0.494  
2,245.101,rs7557724,0.446  
2,245.165,rs7574103,0.413  
2,245.198,rs7605821,0.408  
2,245.310,rs1441612,0.444  
2,245.476,rs1946949,0.472  
2,245.623,rs4663517,0.492  
2,245.625,rs722161,0.491  
2,245.685,rs11684741,0.437  
2,245.728,rs13424401,0.402  
2,246.032,rs6720830,0.236  
2,246.250,rs10190447,0.195  
2,246.333,rs10174126,0.113  
2,246.338,rs10177808,0.109  
2,246.350,rs4318343,0.123  
2,246.369,rs4528714,0.116  
2,246.380,rs13404220,0.113  
2,246.381,rs10177149,0.114  
2,246.399,rs7573787,0.109  
2,246.491,rs7560067,0.106  
2,246.514,rs7568837,0.104  
2,246.670,rs3922490,0.141  
2,246.675,rs4536605,0.150  
2,246.701,rs12478507,0.238  
2,246.791,rs3924658,0.320  
2,246.841,rs12464740,0.335  
2,247.298,rs6710167,0.370  
2,247.379,rs4561612,0.377  
2,247.397,rs13019316,0.377  
2,247.475,rs2163566,0.376  
2,247.561,rs4444469,0.341  
2,247.655,rs4663576,0.374  
2,247.760,rs10201495,0.490  
2,247.764,rs6726521,0.533  
2,247.768,rs7559293,0.545  
2,247.770,rs6717219,0.563  
2,247.838,rs6731727,0.692  
2,247.847,rs11676226,0.705  
2,247.886,rs10177178,0.711  
2,247.989,rs3768969,0.882  
2,248.099,rs12471567,1.017  
2,248.111,rs6760477,1.016  
2,248.365,rs1453117,0.921  
2,248.431,rs6431421,0.893  
2,248.437,rs3768951,0.894

2,248.479,rs1530933,0.905  
2,248.507,rs4663638,0.912  
2,248.679,rs6756597,0.878  
2,248.687,rs13390159,0.920  
2,248.720,rs1377445,0.893  
2,248.766,rs13391114,0.852  
2,248.788,rs2046284,0.845  
2,248.930,rs11897843,0.887  
2,249.029,rs1986988,0.897  
2,249.089,rs10183022,0.903  
2,249.270,rs2720100,1.039  
2,249.387,rs7556982,1.023  
2,249.643,rs4503948,1.164  
2,249.645,rs13029887,1.165  
2,249.685,rs6431487,1.175  
2,250.187,rs7576705,1.168  
2,250.336,rs3748990,1.163  
2,250.588,rs10165956,1.161  
2,250.660,rs4073396,1.100  
2,250.753,rs4490127,1.285  
2,250.838,rs12328617,1.272  
2,250.893,rs11687617,1.275  
2,250.929,rs11676186,1.276  
2,250.940,rs1908970,1.277  
2,250.941,rs4663248,1.277  
2,250.994,rs10929225,1.277  
2,251.113,rs12622722,1.314  
2,251.206,rs1874573,1.188  
2,251.248,rs13431876,1.193  
2,251.391,rs12469894,1.199  
2,251.729,rs6766,1.186  
2,251.841,rs4278886,1.113  
2,251.964,rs6742060,0.987  
2,252.119,rs1565853,0.920  
2,252.421,rs1198819,0.875  
2,252.538,rs6728476,0.918  
2,252.563,rs6746771,0.956  
2,252.575,rs4663269,0.969  
2,252.587,rs6717794,0.982  
2,252.588,rs11680171,1.032  
2,252.589,rs11675777,1.028  
2,252.600,rs1584243,0.981  
2,252.625,rs6729271,0.869  
2,252.665,rs7559272,0.859  
2,252.692,rs4302179,0.838  
2,253.098,rs1562337,0.815  
2,253.221,rs7602358,0.820  
2,253.291,rs2880132,0.774  
2,253.292,rs6722284,0.774  
2,253.997,rs472357,0.811  
2,254.209,rs9287630,0.833  
2,254.224,rs9287631,0.834  
2,254.435,rs7425902,0.771  
2,254.714,rs7571108,0.736  
2,254.729,rs6716943,0.734  
2,254.730,rs11674589,0.734  
2,254.751,rs11673727,0.729  
2,254.848,rs9711993,0.729  
2,254.947,rs9287645,0.729  
2,255.237,rs6736036,0.448  
2,255.239,rs4078406,0.447

2,255.271,rs7558224,0.437  
2,255.382,rs4851976,0.345  
2,255.468,rs3935696,0.299  
2,255.499,rs3922831,0.316  
2,255.506,rs7581424,0.321  
2,255.574,rs11124179,0.360  
2,255.669,rs3791370,0.383  
2,255.732,rs3791399,0.393  
2,255.745,rs3791406,0.396  
2,255.805,rs12469994,0.394  
2,255.820,rs3791471,0.395  
2,255.822,rs3791474,0.396  
2,255.861,rs3791500,0.423  
2,256.013,rs3791603,0.422  
2,256.048,rs291335,0.421  
2,256.228,rs11883623,0.419  
2,256.290,rs925738,0.421  
2,256.412,rs10164440,0.427  
2,256.429,rs2411843,0.428  
2,256.441,rs11680658,0.426  
2,256.514,rs843458,0.405  
2,256.555,rs4851975,0.401  
2,256.573,rs7582778,0.394  
2,256.665,rs1872618,0.350  
2,256.688,rs6710481,0.341  
2,256.755,rs1796449,0.322  
2,256.762,rs13415709,0.321  
2,256.795,rs1564974,0.318  
2,256.888,rs10206786,0.317  
2,256.932,rs4328655,0.358  
2,256.939,rs1882676,0.356  
2,256.966,rs7570018,0.349  
2,257.004,rs11685345,0.302  
2,257.245,rs13419075,0.276  
2,257.362,rs1465820,0.263  
2,257.422,rs11124220,0.232  
2,257.464,rs7566783,0.196  
2,257.553,rs11891511,0.165  
2,257.627,rs4852118,0.150  
2,257.707,rs4852124,0.140  
2,257.723,rs6543576,0.139  
2,257.736,rs11904223,0.139  
2,257.817,rs2412033,0.147  
2,257.921,rs4241236,0.139  
2,257.964,rs11124235,0.126  
2,258.053,rs11894116,0.102  
2,258.223,rs10933613,0.092  
2,258.250,rs13402622,0.089  
2,258.346,rs12695027,0.077  
2,258.439,rs4149549,0.057  
2,258.490,rs6735806,0.050  
2,258.526,rs874060,0.055  
2,258.528,rs11683773,0.056  
2,258.567,rs7587455,0.041  
2,258.712,rs1866645,0.033  
2,258.773,rs12695007,0.037  
2,258.823,rs6719685,0.041  
2,258.827,rs11694467,0.053  
2,258.834,rs13424851,0.052  
2,258.925,rs868379,0.053  
2,258.952,rs7420256,0.052

2,259.230,rs12477831,0.027  
2,259.323,rs2352852,0.019  
2,259.375,rs6750380,0.015  
2,259.417,rs7577243,0.013  
2,259.434,rs3828334,0.014  
2,259.476,rs3811624,0.015  
2,259.503,rs7340350,0.015  
2,259.578,rs4676431,0.013  
2,259.623,rs4676430,0.014  
2,259.740,rs2975758,0.027  
2,259.753,rs3828345,0.029  
2,259.801,rs10933621,0.033  
2,259.861,rs10804410,0.044  
2,259.946,rs10804412,0.068  
2,259.993,rs1001495,0.081  
2,260.003,rs755302,0.083  
2,260.182,rs734586,0.105  
2,260.424,rs4076342,0.129  
2,260.529,rs4430951,0.147  
2,260.565,rs4234091,0.202  
2,260.570,rs4675839,0.184  
2,260.643,rs4675833,0.187  
2,260.674,rs7573476,0.183  
2,260.789,rs12694993,0.192  
2,261.065,rs2074840,0.241  
2,261.219,rs6705421,0.206  
2,261.563,rs757978,0.205  
2,261.627,rs13388333,0.196  
2,261.774,rs7593690,0.157  
2,261.813,rs10175075,0.151  
2,261.835,rs7572476,0.150  
2,261.862,rs7558942,0.128  
2,261.867,rs13004470,0.148  
2,261.889,rs10191556,0.147  
2,262.315,rs12472439,0.164  
2,262.415,rs3892357,0.168  
2,263.024,rs12469535,0.193  
3,0.860,rs990284,-0.004  
3,0.987,rs9878349,-0.005  
3,1.092,rs4685447,-0.007  
3,1.095,rs17006405,-0.007  
3,1.207,rs9310805,-0.011  
3,1.228,rs331892,-0.012  
3,1.265,rs2272522,-0.009  
3,1.296,rs1353811,-0.010  
3,1.354,rs930237,-0.020  
3,1.355,rs3773379,-0.020  
3,1.356,rs3773377,-0.020  
3,1.362,rs11706690,-0.020  
3,1.467,rs1988234,-0.024  
3,1.588,rs1531913,-0.030  
3,1.758,rs9824721,-0.046  
3,1.775,rs9631481,-0.048  
3,1.805,rs1905605,-0.049  
3,1.958,rs2689860,-0.060  
3,2.084,rs10510199,-0.058  
3,2.139,rs1464701,-0.058  
3,2.240,rs4280626,-0.068  
3,2.270,rs11131168,-0.071  
3,2.283,rs10510204,-0.072  
3,2.313,rs6793028,-0.071

3,2.345,rs2727996,-0.087  
3,2.368,rs11719195,-0.108  
3,2.374,rs2729139,-0.114  
3,2.406,rs2872338,-0.170  
3,2.408,rs6782048,-0.144  
3,2.416,rs2130276,-0.168  
3,2.435,rs2036236,-0.219  
3,2.456,rs7632166,-0.237  
3,2.496,rs7644569,-0.269  
3,2.530,rs3913305,-0.226  
3,2.534,rs4082640,-0.229  
3,2.547,rs4085434,-0.238  
3,2.557,rs17037117,-0.254  
3,2.599,rs17291093,-0.303  
3,2.602,rs3772313,-0.306  
3,3.015,rs3796174,-0.347  
3,3.229,rs17038463,-0.352  
3,3.303,rs9875177,-0.354  
3,3.327,rs6791266,-0.355  
3,3.546,rs17039471,-0.380  
3,3.584,rs17193533,-0.384  
3,3.644,rs2648451,-0.386  
3,3.671,rs6781581,-0.324  
3,3.890,rs9820473,-0.329  
3,3.945,rs6779648,-0.319  
3,3.970,rs2046239,-0.320  
3,4.024,rs10510212,-0.328  
3,4.243,rs7634053,-0.342  
3,4.341,rs9883944,-0.347  
3,4.465,rs6771572,-0.349  
3,4.519,rs6796167,-0.345  
3,4.669,rs7631181,-0.342  
3,4.677,rs7610626,-0.341  
3,4.685,rs9818677,-0.341  
3,4.918,rs6763978,-0.402  
3,5.002,rs2727950,-0.417  
3,5.181,rs6777569,-0.318  
3,5.199,rs9825844,-0.310  
3,5.337,rs2727905,-0.274  
3,5.427,rs2727925,-0.277  
3,5.525,rs11720157,-0.287  
3,5.589,rs1178517,-0.299  
3,5.778,rs9841294,-0.337  
3,5.791,rs1720199,-0.342  
3,5.828,rs1967597,-0.349  
3,5.857,rs1685495,-0.355  
3,5.885,rs3856841,-0.374  
3,5.885,rs11715813,-0.374  
3,5.886,rs1827451,-0.375  
3,5.977,rs9828150,-0.323  
3,6.000,rs17015816,-0.287  
3,6.005,rs6793017,-0.276  
3,6.018,rs4685527,-0.253  
3,6.031,rs2616585,-0.243  
3,6.034,rs2728055,-0.237  
3,6.035,rs13314366,-0.233  
3,6.052,rs2728063,-0.186  
3,6.080,rs2619579,-0.189  
3,6.143,rs2728076,-0.176  
3,6.186,rs1600359,-0.182  
3,6.361,rs6804966,-0.156

3,6.449,rs1914009,-0.128  
3,6.526,rs1949342,-0.123  
3,6.654,rs2728047,-0.095  
3,6.754,rs17019466,-0.086  
3,6.757,rs1033237,-0.086  
3,6.771,rs11129265,-0.085  
3,6.990,rs2222104,-0.137  
3,7.138,rs1474021,-0.164  
3,7.193,rs7615939,-0.174  
3,7.292,rs975334,-0.194  
3,7.407,rs11129309,-0.197  
3,7.413,rs6772294,-0.197  
3,7.444,rs1400207,-0.198  
3,7.475,rs6776496,-0.197  
3,7.540,rs9810902,-0.194  
3,7.578,rs17584516,-0.187  
3,7.644,rs11712375,-0.215  
3,7.653,rs9867619,-0.217  
3,7.745,rs7637662,-0.207  
3,7.826,rs6442763,-0.264  
3,7.849,rs4685575,-0.265  
3,8.003,rs17022164,-0.270  
3,8.210,rs6442766,-0.261  
3,8.260,rs6786174,-0.257  
3,8.336,rs344405,-0.224  
3,8.507,rs168165,-0.230  
3,8.757,rs9310923,-0.215  
3,8.883,rs7649063,-0.203  
3,9.031,rs7649378,-0.248  
3,9.046,rs6776572,-0.261  
3,9.097,rs4054727,-0.426  
3,9.106,rs9310935,-0.433  
3,9.115,rs163582,-0.442  
3,9.210,rs2290611,-0.505  
3,9.219,rs3792424,-0.517  
3,9.265,rs3804803,-0.585  
3,9.288,rs3804800,-0.626  
3,9.301,rs334807,-0.686  
3,9.303,rs3804797,-0.687  
3,9.333,rs7647903,-0.655  
3,9.394,rs6793085,-0.614  
3,9.508,rs1153459,-0.569  
3,9.561,rs1278150,-0.553  
3,9.814,rs1669336,-0.492  
3,10.126,rs6768756,-0.491  
3,10.151,rs4685616,-0.496  
3,10.338,rs7622674,-0.527  
3,10.348,rs3846145,-0.526  
3,10.352,rs1153452,-0.529  
3,10.371,rs2322044,-0.524  
3,10.405,rs1995196,-0.542  
3,10.418,rs9835812,-0.551  
3,10.439,rs4142860,-0.503  
3,10.751,rs9874287,-0.503  
3,10.847,rs7634908,-0.492  
3,10.958,rs723168,-0.548  
3,10.977,rs2054873,-0.520  
3,11.354,rs4685672,-0.404  
3,11.390,rs17293711,-0.391  
3,11.390,rs2874754,-0.391  
3,11.400,rs1873023,-0.395

3,11.417,rs4685676,-0.404  
3,11.462,rs983154,-0.421  
3,11.576,rs1312821,-0.421  
3,11.599,rs6796414,-0.422  
3,11.653,rs769787,-0.423  
3,11.709,rs12629402,-0.421  
3,11.732,rs769798,-0.418  
3,11.778,rs17362851,-0.432  
3,11.842,rs711540,-0.484  
3,11.844,rs2119809,-0.484  
3,12.236,rs13075986,-0.473  
3,12.928,rs1087817,-0.448  
3,12.969,rs795727,-0.438  
3,12.987,rs711676,-0.469  
3,13.133,rs795302,-0.429  
3,13.563,rs310731,-0.479  
3,13.662,rs711673,-0.506  
3,13.782,rs11915920,-0.512  
3,13.832,rs11919486,-0.515  
3,13.890,rs17040638,-0.513  
3,14.059,rs17040736,-0.499  
3,14.185,rs1038639,-0.482  
3,14.224,rs304053,-0.488  
3,14.246,rs304006,-0.491  
3,14.291,rs9822773,-0.479  
3,14.309,rs11923960,-0.463  
3,14.353,rs6804671,-0.466  
3,14.406,rs4684427,-0.463  
3,14.456,rs931503,-0.433  
3,14.458,rs2029665,-0.432  
3,14.510,rs4685785,-0.451  
3,14.540,rs17709863,-0.458  
3,14.660,rs9311395,-0.406  
3,14.755,rs931389,-0.422  
3,14.788,rs6786487,-0.422  
3,14.797,rs3828437,-0.437  
3,14.799,rs1866997,-0.447  
3,14.800,rs6785305,-0.457  
3,14.833,rs3805011,-0.433  
3,14.887,rs1018109,-0.470  
3,14.926,rs2291862,-0.479  
3,15.006,rs4685829,-0.470  
3,15.013,rs11708908,-0.481  
3,15.018,rs11711879,-0.489  
3,15.019,rs12493413,-0.527  
3,15.019,rs3805032,-0.486  
3,15.034,rs3805036,-0.515  
3,15.156,rs3762781,-0.432  
3,15.177,rs6807140,-0.480  
3,15.287,rs6442919,-0.474  
3,15.298,rs1955179,-0.474  
3,15.329,rs7638383,-0.467  
3,15.410,rs908078,-0.472  
3,15.416,rs11925620,-0.470  
3,15.427,rs2137947,-0.468  
3,15.462,rs4532119,-0.454  
3,15.552,rs9858342,-0.437  
3,15.588,rs17041935,-0.415  
3,15.629,rs2570008,-0.388  
3,15.644,rs6782593,-0.425  
3,15.650,rs9828404,-0.427

3,15.717,rs2671758,-0.448  
3,15.868,rs11925441,-0.415  
3,15.994,rs341981,-0.389  
3,16.055,rs341973,-0.385  
3,16.070,rs3846158,-0.382  
3,16.164,rs9879338,-0.349  
3,16.183,rs7638016,-0.346  
3,16.276,rs407334,-0.332  
3,16.312,rs4684476,-0.326  
3,16.334,rs1114430,-0.321  
3,16.433,rs4143244,-0.330  
3,16.519,rs7635144,-0.362  
3,16.570,rs10510305,-0.351  
3,16.652,rs17042584,-0.361  
3,16.739,rs2686534,-0.378  
3,16.781,rs9311542,-0.398  
3,16.838,rs17749328,-0.397  
3,16.908,rs7633722,-0.387  
3,16.975,rs6771379,-0.410  
3,17.168,rs9284892,-0.433  
3,17.266,rs9311613,-0.454  
3,17.394,rs9311642,-0.474  
3,17.405,rs1452713,-0.472  
3,17.457,rs2444218,-0.468  
3,17.465,rs721213,-0.487  
3,17.471,rs1836577,-0.538  
3,17.537,rs11711086,-0.526  
3,17.631,rs717187,-0.525  
3,17.685,rs977905,-0.516  
3,17.699,rs7624621,-0.512  
3,17.717,rs4685993,-0.503  
3,17.750,rs2572683,-0.502  
3,17.897,rs9810413,-0.490  
3,18.068,rs9835716,-0.479  
3,18.215,rs1914413,-0.402  
3,18.273,rs908603,-0.365  
3,18.315,rs868243,-0.362  
3,18.358,rs7625359,-0.355  
3,18.365,rs17288023,-0.355  
3,18.390,rs7614027,-0.358  
3,18.562,rs1398788,-0.384  
3,18.592,rs1394156,-0.382  
3,18.622,rs6790803,-0.459  
3,18.845,rs7625439,-0.420  
3,18.850,rs3967024,-0.418  
3,19.049,rs9879475,-0.315  
3,19.059,rs4686053,-0.316  
3,19.080,rs474423,-0.284  
3,19.144,rs9855624,-0.282  
3,19.300,rs352747,-0.267  
3,19.376,rs4686076,-0.246  
3,19.488,rs12491369,-0.193  
3,19.496,rs7645283,-0.190  
3,19.538,rs12635360,-0.160  
3,19.548,rs163541,-0.140  
3,19.563,rs6808904,-0.110  
3,19.572,rs1400286,-0.107  
3,19.610,rs7651971,-0.098  
3,19.658,rs6773334,-0.104  
3,19.667,rs17046239,-0.102  
3,19.682,rs339805,-0.099



3,19.770,rs9859343,-0.082  
3,19.771,rs9311966,-0.082  
3,19.813,rs339022,-0.080  
3,19.835,rs17046415,-0.078  
3,19.899,rs1516570,-0.084  
3,19.901,rs478250,-0.082  
3,19.916,rs781393,-0.078  
3,19.920,rs6796324,-0.078  
3,19.922,rs1154352,-0.093  
3,19.936,rs781388,-0.119  
3,19.955,rs670764,-0.121  
3,19.989,rs2014195,-0.124  
3,20.064,rs1021687,-0.113  
3,20.201,rs9848973,-0.128  
3,20.349,rs17031847,-0.135  
3,20.564,rs13070476,-0.132  
3,20.805,rs984123,-0.133  
3,20.858,rs17652614,-0.134  
3,20.908,rs7617297,-0.137  
3,20.972,rs10510366,-0.137  
3,20.982,rs9883258,-0.136  
3,20.999,rs13064153,-0.131  
3,21.167,rs13096022,-0.091  
3,21.221,rs7623046,-0.117  
3,21.223,rs779710,-0.118  
3,21.268,rs7374553,-0.161  
3,21.398,rs779746,-0.151  
3,21.464,rs1485179,-0.158  
3,21.509,rs1485175,-0.158  
3,21.563,rs3804880,-0.156  
3,21.656,rs3864067,-0.161  
3,21.834,rs10510371,-0.178  
3,21.856,rs332936,-0.178  
3,21.881,rs329037,-0.183  
3,21.971,rs161885,-0.200  
3,22.054,rs11131090,-0.143  
3,22.094,rs11706770,-0.142  
3,22.247,rs326414,-0.106  
3,22.381,rs17048334,-0.110  
3,22.467,rs9850126,-0.112  
3,22.475,rs1385437,-0.111  
3,22.479,rs6764556,-0.127  
3,22.495,rs6785352,-0.117  
3,22.573,rs6793461,-0.083  
3,22.619,rs9835263,-0.079  
3,22.705,rs516334,-0.072  
3,22.842,rs500956,-0.077  
3,22.844,rs472126,-0.077  
3,22.889,rs6779176,-0.081  
3,23.033,rs463659,-0.089  
3,23.099,rs6443171,-0.083  
3,23.194,rs6799128,-0.093  
3,23.208,rs1979582,-0.091  
3,23.221,rs9312013,-0.083  
3,23.277,rs1905772,-0.055  
3,23.285,rs1385469,-0.056  
3,23.328,rs359045,-0.057  
3,23.358,rs6798206,-0.054  
3,23.399,rs358977,-0.051  
3,23.411,rs6777857,-0.050  
3,23.415,rs10510390,-0.050

3,23.727,rs1876611,-0.040  
3,23.840,rs956377,-0.037  
3,23.994,rs9878578,-0.027  
3,24.001,rs355090,-0.026  
3,24.012,rs10510393,-0.020  
3,24.019,rs873227,-0.017  
3,24.134,rs355057,-0.008  
3,24.176,rs11710750,-0.005  
3,24.185,rs11131140,-0.003  
3,24.210,rs11131141,-0.000  
3,24.242,rs164956,0.004  
3,24.322,rs6785267,0.007  
3,24.584,rs241055,0.004  
3,24.627,rs164459,0.003  
3,24.682,rs7634632,0.003  
3,24.808,rs237866,0.000  
3,24.816,rs2072582,0.000  
3,24.861,rs237875,0.001  
3,24.954,rs237887,0.001  
3,24.954,rs237888,0.001  
3,25.041,rs2301261,0.001  
3,25.127,rs237852,0.001  
3,25.339,rs12632905,0.001  
3,25.498,rs398518,0.001  
3,25.582,rs7641235,0.001  
3,25.710,rs341791,0.000  
3,25.839,rs2662089,0.000  
3,25.858,rs1513315,0.000  
3,25.875,rs9875468,0.000  
3,25.879,rs17049971,0.000  
3,25.886,rs1162326,0.000  
3,25.918,rs2662090,0.000  
3,25.920,rs7609881,0.000  
3,25.966,rs7632256,0.002  
3,25.977,rs1162395,0.001  
3,25.988,rs6793348,0.001  
3,26.121,rs422552,0.005  
3,26.215,rs2257056,0.002  
3,26.284,rs986119,0.000  
3,26.307,rs400052,-0.000  
3,26.340,rs1154386,-0.003  
3,26.406,rs441300,-0.004  
3,26.406,rs9819189,-0.004  
3,26.483,rs938116,-0.008  
3,26.533,rs2648521,-0.006  
3,26.556,rs9861610,-0.005  
3,26.559,rs10222369,-0.005  
3,26.610,rs2600192,-0.009  
3,26.613,rs17050210,-0.010  
3,26.640,rs12631463,-0.009  
3,26.696,rs11707847,-0.008  
3,26.705,rs3852050,-0.008  
3,26.711,rs4686342,-0.007  
3,26.736,rs2648549,-0.007  
3,26.975,rs9818611,-0.020  
3,27.056,rs2633789,-0.026  
3,27.208,rs787837,-0.039  
3,27.219,rs159147,-0.030  
3,27.260,rs293779,-0.040  
3,27.273,rs159146,-0.044  
3,27.412,rs9878419,-0.042

3,27.519,rs455863,-0.040  
3,27.774,rs3172417,-0.027  
3,27.845,rs1642739,-0.029  
3,27.869,rs708030,-0.023  
3,27.873,rs2619508,-0.023  
3,27.921,rs11465886,-0.025  
3,28.145,rs26796,-0.039  
3,28.262,rs34870,-0.038  
3,28.275,rs7644022,-0.038  
3,28.291,rs34881,-0.047  
3,28.295,rs34892,-0.071  
3,28.300,rs808933,-0.096  
3,28.300,rs17032981,-0.095  
3,28.303,rs17033198,-0.085  
3,28.309,rs12487529,-0.060  
3,28.336,rs4684731,-0.063  
3,28.343,rs1000772,-0.063  
3,28.352,rs11707497,-0.064  
3,28.575,rs2596834,-0.030  
3,28.594,rs12632152,-0.027  
3,28.596,rs1905752,-0.027  
3,28.766,rs1960131,-0.024  
3,28.796,rs901033,-0.025  
3,28.803,rs2581215,-0.025  
3,28.808,rs2581207,-0.026  
3,28.850,rs2697152,-0.043  
3,28.854,rs4610207,-0.044  
3,28.871,rs1881363,-0.051  
3,28.887,rs2930149,-0.056  
3,28.911,rs2601126,-0.047  
3,28.926,rs1710892,-0.038  
3,28.948,rs2928078,-0.043  
3,28.968,rs2272403,-0.049  
3,28.979,rs1062246,-0.053  
3,29.106,rs6810358,-0.054  
3,29.166,rs6796787,-0.052  
3,29.193,rs7619408,-0.050  
3,29.219,rs7639145,-0.048  
3,29.250,rs430353,-0.031  
3,30.006,rs7617620,-0.010  
3,30.071,rs12632852,-0.013  
3,30.171,rs17034817,-0.016  
3,30.174,rs6770931,-0.016  
3,30.176,rs9871522,-0.017  
3,30.179,rs2574711,-0.017  
3,30.186,rs6782029,-0.018  
3,30.217,rs7627256,-0.021  
3,30.238,rs6786278,-0.021  
3,30.271,rs9815906,-0.020  
3,30.273,rs370234,-0.017  
3,30.279,rs9310393,-0.015  
3,30.282,rs7647310,-0.014  
3,30.295,rs301567,-0.033  
3,30.296,rs904267,-0.030  
3,30.343,rs1857961,-0.025  
3,30.356,rs440746,-0.031  
3,30.364,rs2133064,-0.031  
3,30.376,rs51578,-0.031  
3,30.391,rs9869051,-0.030  
3,30.402,rs431470,-0.029  
3,30.404,rs13083227,-0.029

3,30.414,rs9812594,-0.029  
3,30.466,rs3905902,-0.030  
3,30.614,rs11924163,-0.036  
3,30.705,rs2920500,-0.039  
3,30.765,rs12629751,-0.044  
3,30.786,rs2972162,-0.046  
3,30.833,rs1152005,-0.052  
3,30.836,rs7618046,-0.065  
3,30.841,rs9855622,-0.054  
3,30.863,rs709162,-0.066  
3,30.871,rs12495676,-0.066  
3,30.920,rs713178,-0.069  
3,30.943,rs2569997,-0.049  
3,31.054,rs428862,-0.058  
3,31.069,rs165571,-0.059  
3,31.075,rs11712537,-0.059  
3,31.084,rs4684895,-0.058  
3,31.111,rs2881979,-0.055  
3,31.112,rs380499,-0.055  
3,31.114,rs361052,-0.055  
3,31.167,rs6784345,-0.034  
3,31.204,rs413245,-0.028  
3,31.226,rs2648699,-0.024  
3,31.251,rs521573,-0.019  
3,31.283,rs636758,-0.019  
3,31.354,rs165435,-0.028  
3,31.361,rs358374,-0.028  
3,31.375,rs11719364,-0.028  
3,31.461,rs242519,-0.022  
3,31.520,rs6809771,-0.019  
3,31.548,rs4684126,-0.017  
3,31.579,rs6442363,-0.015  
3,32.069,rs12636440,-0.000  
3,32.071,rs17038211,-0.000  
3,32.093,rs2597515,-0.000  
3,32.163,rs2630441,-0.000  
3,32.173,rs2731343,-0.000  
3,32.218,rs17178474,-0.001  
3,32.251,rs10865714,-0.001  
3,32.342,rs1878173,-0.000  
3,32.379,rs4596126,-0.001  
3,32.415,rs9838270,-0.002  
3,32.420,rs1061375,-0.002  
3,32.420,rs7610284,-0.002  
3,32.425,rs2974384,-0.006  
3,32.428,rs729639,-0.007  
3,32.429,rs4685026,-0.006  
3,32.430,rs3762725,-0.003  
3,32.804,rs17038868,0.000  
3,32.974,rs1350344,0.001  
3,33.039,rs4428160,0.001  
3,33.106,rs1871856,0.003  
3,33.112,rs2128163,0.003  
3,33.161,rs1482038,0.009  
3,33.230,rs6442441,0.010  
3,33.276,rs12497942,0.006  
3,33.311,rs1550161,0.004  
3,33.316,rs2118105,0.002  
3,33.321,rs1865884,0.000  
3,33.338,rs10446439,-0.000  
3,33.348,rs1038300,-0.000

3,33.391,rs7647134,-0.002  
3,33.408,rs12638941,-0.005  
3,33.425,rs748098,-0.006  
3,33.427,rs4684217,-0.006  
3,33.441,rs9683047,-0.007  
3,33.448,rs7628386,-0.007  
3,33.487,rs6763180,-0.010  
3,33.497,rs3773172,-0.008  
3,33.523,rs1062540,-0.003  
3,33.524,rs2327896,-0.003  
3,33.526,rs2341985,-0.003  
3,33.531,rs6794801,-0.002  
3,33.565,rs9878341,-0.004  
3,33.587,rs7645232,-0.004  
3,33.622,rs13062253,-0.004  
3,33.660,rs7647806,-0.003  
3,33.709,rs4685199,-0.001  
3,33.720,rs7615913,-0.002  
3,33.727,rs12631299,-0.003  
3,33.750,rs12495033,-0.006  
3,33.761,rs4583633,-0.003  
3,33.768,rs4685204,-0.003  
3,33.820,rs17040011,-0.004  
3,33.823,rs13091225,-0.004  
3,33.869,rs17320277,-0.001  
3,33.948,rs7636830,-0.001  
3,33.980,rs2568848,-0.001  
3,34.021,rs903056,-0.005  
3,34.031,rs829182,-0.007  
3,34.034,rs864361,-0.008  
3,34.035,rs3899614,-0.009  
3,34.043,rs9828560,-0.012  
3,34.084,rs9875241,-0.016  
3,34.105,rs6442478,-0.017  
3,34.118,rs10510432,-0.017  
3,34.156,rs1389300,-0.019  
3,34.252,rs293908,-0.024  
3,34.294,rs4685234,-0.016  
3,34.301,rs12491077,-0.016  
3,34.444,rs2164358,-0.024  
3,34.463,rs12489827,-0.024  
3,34.486,rs17477815,-0.023  
3,34.615,rs11712564,-0.016  
3,34.640,rs7625117,-0.016  
3,34.775,rs826428,-0.011  
3,34.883,rs9813606,-0.007  
3,34.884,rs2291853,-0.007  
3,34.913,rs851848,-0.010  
3,34.953,rs6442511,-0.008  
3,35.008,rs3773464,-0.005  
3,35.146,rs13075694,-0.013  
3,35.538,rs9880034,-0.019  
3,35.651,rs2470549,-0.021  
3,36.046,rs9815997,-0.014  
3,36.076,rs897204,-0.015  
3,36.082,rs6442577,-0.015  
3,36.122,rs4234534,-0.014  
3,36.135,rs4423748,-0.014  
3,36.148,rs4078148,-0.013  
3,36.168,rs13079803,-0.013  
3,36.228,rs17041971,-0.010

3,36.277,rs6442586,-0.008  
3,36.304,rs842280,-0.010  
3,36.311,rs9848911,-0.010  
3,36.403,rs842274,-0.019  
3,36.501,rs1060699,-0.014  
3,36.540,rs689953,-0.010  
3,36.620,rs12486361,-0.015  
3,36.629,rs7632675,-0.013  
3,36.651,rs4685337,-0.010  
3,36.694,rs11710881,-0.011  
3,36.828,rs2881514,-0.015  
3,37.010,rs10510453,-0.034  
3,37.097,rs7623201,-0.035  
3,37.125,rs7647846,-0.036  
3,37.292,rs7636863,-0.037  
3,37.419,rs4685385,-0.039  
3,37.631,rs6762816,-0.041  
3,37.657,rs11549705,-0.042  
3,37.680,rs4077616,-0.035  
3,37.683,rs4072191,-0.034  
3,37.688,rs6778609,-0.032  
3,37.702,rs4685442,-0.035  
3,37.749,rs1463219,-0.042  
3,38.068,rs9862290,-0.034  
3,38.286,rs7646613,-0.019  
3,38.295,rs7620376,-0.019  
3,38.330,rs9861146,-0.019  
3,38.581,rs7653460,-0.019  
3,38.629,rs11921478,-0.016  
3,38.693,rs9310549,-0.010  
3,38.700,rs9841621,-0.010  
3,38.716,rs11128887,-0.010  
3,38.793,rs1328542,-0.005  
3,38.809,rs714141,-0.004  
3,38.945,rs6785093,0.000  
3,38.950,rs336629,-0.005  
3,39.205,rs4370047,-0.000  
3,39.256,rs9817260,0.000  
3,39.292,rs9881034,0.000  
3,39.333,rs6792900,-0.000  
3,39.358,rs4533671,-0.000  
3,39.359,rs4401379,-0.000  
3,39.361,rs11717739,-0.000  
3,39.397,rs7428879,-0.000  
3,39.499,rs4408886,-0.001  
3,39.500,rs4973721,-0.001  
3,39.590,rs4101508,-0.001  
3,39.604,rs6773955,-0.002  
3,39.836,rs17005800,-0.005  
3,39.877,rs4264750,-0.005  
3,39.965,rs7645658,-0.003  
3,40.000,rs10470605,-0.003  
3,40.202,rs7628760,-0.002  
3,40.312,rs6804427,-0.002  
3,40.443,rs17006228,-0.003  
3,40.508,rs1506097,-0.010  
3,40.767,rs4103004,-0.011  
3,40.828,rs6808352,-0.014  
3,40.918,rs7617840,-0.021  
3,40.943,rs11917197,-0.022  
3,40.945,rs17006645,-0.022

3,41.150,rs6801666,-0.025  
3,41.204,rs11719694,-0.016  
3,41.237,rs9854943,-0.015  
3,41.420,rs661669,-0.014  
3,41.435,rs1403651,-0.013  
3,41.608,rs9841080,-0.006  
3,41.634,rs17007409,-0.002  
3,41.655,rs12491632,-0.004  
3,41.664,rs9839849,-0.005  
3,41.683,rs17810229,-0.005  
3,41.713,rs4857969,-0.004  
3,41.723,rs7630411,-0.004  
3,41.909,rs1498994,-0.000  
3,41.953,rs1587379,-0.000  
3,42.063,rs17008011,-0.000  
3,42.070,rs958635,-0.000  
3,42.089,rs10510510,-0.000  
3,42.334,rs13074521,0.002  
3,42.432,rs2661406,0.007  
3,42.436,rs13059346,0.007  
3,42.499,rs1395991,0.006  
3,42.556,rs376703,0.009  
3,42.570,rs341844,0.010  
3,42.601,rs424842,0.012  
3,42.610,rs800621,0.013  
3,42.619,rs1026687,0.013  
3,42.621,rs163471,0.014  
3,42.635,rs6800260,0.014  
3,42.641,rs2194607,0.015  
3,42.642,rs167936,0.009  
3,42.671,rs920118,0.007  
3,42.768,rs1841914,0.002  
3,42.784,rs1382167,0.004  
3,42.785,rs6776046,0.004  
3,42.802,rs1824212,0.001  
3,42.827,rs3860583,0.002  
3,42.890,rs10510515,0.005  
3,42.929,rs9858811,0.008  
3,42.930,rs957589,0.008  
3,42.936,rs12106696,0.007  
3,42.969,rs7428718,0.004  
3,42.972,rs7626282,0.001  
3,42.973,rs17009440,0.001  
3,42.974,rs6798573,0.001  
3,43.002,rs4858017,0.000  
3,43.041,rs9850363,-0.000  
3,43.044,rs11129023,-0.000  
3,43.057,rs4858021,-0.001  
3,43.073,rs2670259,-0.003  
3,43.077,rs2670256,-0.003  
3,43.108,rs2630807,-0.005  
3,43.109,rs17009807,-0.005  
3,43.131,rs9310662,-0.006  
3,43.380,rs259556,-0.017  
3,43.396,rs1479992,-0.018  
3,43.403,rs17583756,-0.019  
3,43.415,rs1679256,-0.016  
3,43.419,rs259435,-0.016  
3,43.422,rs11914361,-0.015  
3,43.438,rs2170091,-0.022  
3,43.446,rs6793553,-0.030

3,43.450,rs1527637,-0.028  
3,43.472,rs2728981,-0.024  
3,43.499,rs9809134,-0.018  
3,43.501,rs1389663,-0.018  
3,43.502,rs1494223,-0.018  
3,43.518,rs6419844,-0.020  
3,43.569,rs2122369,-0.024  
3,43.622,rs9824112,-0.036  
3,43.635,rs12633771,-0.036  
3,43.657,rs1870480,-0.035  
3,43.660,rs1349282,-0.035  
3,43.719,rs2358930,-0.040  
3,43.749,rs1471234,-0.037  
3,43.813,rs33117,-0.041  
3,43.953,rs1606478,-0.043  
3,44.057,rs680110,-0.038  
3,44.130,rs1817582,-0.037  
3,44.196,rs9826441,-0.036  
3,44.327,rs7374735,-0.043  
3,44.769,rs13062101,-0.038  
3,45.020,rs6787720,-0.053  
3,45.064,rs7639174,-0.045  
3,45.093,rs4072410,-0.073  
3,45.104,rs4858524,-0.079  
3,45.121,rs6807584,-0.081  
3,45.163,rs7633774,-0.085  
3,45.165,rs9883225,-0.084  
3,45.180,rs17702569,-0.084  
3,45.180,rs6550783,-0.084  
3,45.190,rs1037633,-0.086  
3,45.252,rs6774017,-0.103  
3,45.270,rs17754530,-0.109  
3,45.308,rs9861357,-0.108  
3,45.669,rs951015,-0.081  
3,45.728,rs11927256,-0.081  
3,45.918,rs2683530,-0.075  
3,45.935,rs12496664,-0.075  
3,45.994,rs13097208,-0.074  
3,46.005,rs826223,-0.073  
3,46.006,rs12491199,-0.073  
3,46.016,rs4858110,-0.073  
3,46.020,rs986575,-0.073  
3,46.021,rs17014454,-0.073  
3,46.033,rs9840296,-0.067  
3,46.069,rs826232,-0.053  
3,46.120,rs2167115,-0.048  
3,46.147,rs7610039,-0.045  
3,46.169,rs9812034,-0.031  
3,46.199,rs9809320,-0.035  
3,46.217,rs1354601,-0.031  
3,46.231,rs6550859,-0.030  
3,46.236,rs11919155,-0.030  
3,46.251,rs9852824,-0.030  
3,46.336,rs5014281,-0.027  
3,46.347,rs9831450,-0.025  
3,46.398,rs9845983,-0.014  
3,46.405,rs6792725,-0.015  
3,46.427,rs892940,-0.013  
3,46.461,rs9850443,-0.010  
3,46.507,rs7632924,-0.011  
3,46.567,rs9812637,-0.012



3,46.601,rs9862855,-0.002  
3,46.611,rs4858125,-0.001  
3,46.644,rs13088027,-0.001  
3,46.679,rs6802797,-0.002  
3,46.680,rs6550908,-0.002  
3,46.689,rs7623169,-0.002  
3,46.720,rs1994908,-0.002  
3,46.840,rs2885598,-0.000  
3,46.852,rs11711279,-0.000  
3,46.906,rs2363520,0.000  
3,47.083,rs6780762,0.001  
3,47.149,rs4502548,0.001  
3,47.305,rs1021701,0.000  
3,47.340,rs1604003,-0.000  
3,47.603,rs17516267,-0.000  
3,47.655,rs1909526,-0.000  
3,48.008,rs9809773,-0.001  
3,48.066,rs10510564,-0.002  
3,48.184,rs11921615,-0.004  
3,48.213,rs755661,-0.004  
3,48.226,rs9284857,-0.003  
3,48.227,rs6800566,-0.003  
3,48.242,rs4681063,-0.003  
3,48.252,rs13314219,-0.001  
3,48.289,rs13087022,-0.000  
3,48.314,rs1286648,-0.000  
3,48.319,rs1286646,-0.000  
3,48.338,rs1286769,-0.000  
3,48.348,rs17526839,-0.001  
3,48.352,rs1286733,-0.001  
3,48.360,rs6782425,-0.002  
3,48.373,rs1001647,-0.002  
3,48.456,rs9877259,-0.006  
3,48.513,rs2968169,-0.013  
3,48.575,rs10470654,-0.011  
3,48.755,rs1160717,-0.026  
3,48.898,rs7642228,-0.025  
3,48.904,rs1352718,-0.023  
3,48.943,rs9851900,-0.024  
3,48.968,rs13065275,-0.020  
3,49.066,rs7652856,-0.028  
3,49.126,rs6788033,-0.032  
3,49.243,rs6792668,-0.043  
3,49.296,rs12635000,-0.045  
3,49.392,rs1466957,-0.010  
3,49.460,rs1374798,-0.012  
3,49.465,rs2044573,-0.007  
3,49.466,rs4973842,-0.008  
3,49.924,rs4973768,-0.007  
3,50.086,rs629462,-0.005  
3,50.120,rs12485763,-0.005  
3,50.129,rs7429875,-0.005  
3,50.186,rs9855458,-0.006  
3,50.215,rs6762388,-0.007  
3,50.282,rs6764447,-0.011  
3,50.333,rs3806624,-0.016  
3,50.396,rs6770919,-0.022  
3,50.434,rs2371121,-0.026  
3,50.511,rs11708641,-0.031  
3,50.576,rs2253562,-0.037  
3,50.578,rs12636813,-0.037

3, 50.705, rs2199654, -0.031  
3, 50.717, rs2063034, -0.021  
3, 50.723, rs9825129, -0.022  
3, 50.752, rs433317, -0.028  
3, 50.815, rs6765138, -0.035  
3, 50.984, rs925527, -0.057  
3, 51.117, rs6800659, -0.059  
3, 51.243, rs7641491, -0.061  
3, 51.824, rs9830706, -0.049  
3, 51.860, rs1461803, -0.048  
3, 51.897, rs17651822, -0.051  
3, 51.975, rs6802374, -0.049  
3, 52.051, rs12634756, -0.048  
3, 52.076, rs7617605, -0.048  
3, 52.085, rs7633531, -0.048  
3, 52.169, rs9821969, -0.052  
3, 52.172, rs6767753, -0.052  
3, 52.272, rs9816337, -0.055  
3, 52.370, rs6765943, -0.053  
3, 52.537, rs6796246, -0.036  
3, 52.613, rs634868, -0.042  
3, 52.633, rs546270, -0.046  
3, 52.732, rs2102801, -0.020  
3, 52.752, rs12492761, -0.021  
3, 52.761, rs6780332, -0.030  
3, 52.814, rs1517150, -0.033  
3, 52.897, rs7622721, -0.019  
3, 52.913, rs987693, -0.014  
3, 52.924, rs9812101, -0.012  
3, 52.964, rs1020043, -0.008  
3, 52.981, rs9865738, -0.007  
3, 52.988, rs17023226, -0.006  
3, 53.002, rs6549924, -0.006  
3, 53.029, rs6777437, -0.004  
3, 53.038, rs6773182, -0.004  
3, 53.067, rs7427457, -0.008  
3, 53.111, rs4574243, -0.024  
3, 53.128, rs4389439, -0.026  
3, 53.178, rs9310898, -0.036  
3, 53.183, rs17023466, -0.037  
3, 53.191, rs2053288, -0.039  
3, 53.246, rs9861677, -0.054  
3, 53.377, rs35911, -0.049  
3, 53.537, rs9829357, -0.038  
3, 53.603, rs2888127, -0.040  
3, 53.611, rs9865546, -0.040  
3, 53.615, rs7622316, -0.041  
3, 53.772, rs3773108, -0.072  
3, 53.801, rs2371816, -0.115  
3, 53.888, rs9837143, -0.132  
3, 53.903, rs10446455, -0.134  
3, 53.930, rs7633961, -0.174  
3, 53.957, rs4680733, -0.167  
3, 54.016, rs1449292, -0.154  
3, 54.078, rs17024608, -0.130  
3, 54.084, rs6776043, -0.127  
3, 54.105, rs1868488, -0.122  
3, 54.115, rs6798671, -0.120  
3, 54.182, rs11717088, -0.117  
3, 54.548, rs6791084, -0.086  
3, 54.658, rs4680877, -0.078

3,54.687,rs2371997,-0.092  
3,54.725,rs1433989,-0.093  
3,54.764,rs6549977,-0.092  
3,54.854,rs6549980,-0.121  
3,54.944,rs7634533,-0.100  
3,54.981,rs11129399,-0.090  
3,55.060,rs1495589,-0.108  
3,55.196,rs11917602,-0.139  
3,55.242,rs4305453,-0.149  
3,55.259,rs9822117,-0.145  
3,55.298,rs973404,-0.134  
3,55.395,rs1835538,-0.157  
3,55.419,rs4522809,-0.147  
3,55.429,rs12490899,-0.149  
3,55.483,rs6792117,-0.174  
3,55.507,rs3773651,-0.219  
3,55.514,rs1346907,-0.232  
3,55.674,rs1393752,-0.297  
3,55.726,rs6783336,-0.304  
3,55.745,rs1494738,-0.307  
3,55.963,rs1876168,-0.286  
3,56.003,rs294314,-0.286  
3,56.198,rs17643248,-0.327  
3,56.243,rs4515095,-0.324  
3,56.296,rs4955188,-0.328  
3,56.306,rs4317137,-0.328  
3,56.324,rs9852655,-0.330  
3,56.453,rs1006965,-0.341  
3,56.511,rs17027548,-0.343  
3,56.596,rs882648,-0.347  
3,56.660,rs7639313,-0.343  
3,56.913,rs3792551,-0.287  
3,56.940,rs2278960,-0.310  
3,56.941,rs1902334,-0.311  
3,56.941,rs6785222,-0.243  
3,56.995,rs7613225,-0.283  
3,57.040,rs1902341,-0.318  
3,57.102,rs7653447,-0.360  
3,57.128,rs13087711,-0.331  
3,57.200,rs4452359,-0.276  
3,57.226,rs4478116,-0.250  
3,57.275,rs4444747,-0.195  
3,57.357,rs12485651,-0.184  
3,57.509,rs4955238,-0.160  
3,57.651,rs7644491,-0.119  
3,57.665,rs11720070,-0.101  
3,57.666,rs4440157,-0.101  
3,57.679,rs4078487,-0.074  
3,57.679,rs11713777,-0.074  
3,57.688,rs7616055,-0.070  
3,57.700,rs6800446,-0.064  
3,57.761,rs13314943,-0.068  
3,57.786,rs7644602,-0.073  
3,57.805,rs11914777,-0.078  
3,57.840,rs11129515,-0.095  
3,57.840,rs2053280,-0.096  
3,57.861,rs7623462,-0.095  
3,57.879,rs6782595,-0.080  
3,57.898,rs17279970,-0.065  
3,57.920,rs3867381,-0.056  
3,57.932,rs11924535,-0.050

3,57.977,rs614004,-0.036  
3,57.988,rs17029445,-0.036  
3,58.057,rs369751,-0.040  
3,58.139,rs6782149,-0.034  
3,58.331,rs6550146,-0.043  
3,58.567,rs6809722,-0.044  
3,58.606,rs4909018,-0.043  
3,58.627,rs6550169,-0.017  
3,58.745,rs6770096,-0.008  
3,58.752,rs9867387,-0.007  
3,58.772,rs13314993,-0.006  
3,58.793,rs6793913,-0.004  
3,58.928,rs11707667,-0.001  
3,59.067,rs4384906,-0.004  
3,59.071,rs4678772,-0.004  
3,59.078,rs4455284,-0.001  
3,59.141,rs11928797,-0.000  
3,59.170,rs1532590,-0.000  
3,59.210,rs9817221,-0.000  
3,59.448,rs9843488,0.000  
3,59.449,rs13081248,0.000  
3,59.618,rs9848859,0.001  
3,59.632,rs11916425,0.000  
3,59.641,rs6776985,0.000  
3,59.664,rs4678623,-0.000  
3,59.736,rs12494973,-0.000  
3,59.750,rs4076661,-0.000  
3,59.804,rs9813805,0.000  
3,59.825,rs1899082,0.000  
3,59.866,rs11927965,0.000  
3,59.891,rs9859996,0.000  
3,60.046,rs1852808,-0.000  
3,60.050,rs17201571,-0.000  
3,60.108,rs9875943,-0.000  
3,60.141,rs7649251,-0.000  
3,60.240,rs564190,-0.002  
3,60.332,rs4678492,-0.002  
3,60.388,rs2035257,-0.003  
3,60.395,rs9990367,-0.003  
3,60.461,rs11129640,-0.005  
3,60.533,rs6788583,-0.006  
3,60.564,rs1376021,-0.010  
3,60.683,rs814487,-0.011  
3,60.701,rs17033173,-0.018  
3,60.702,rs12631043,-0.018  
3,60.761,rs13069451,-0.014  
3,60.777,rs10510663,-0.015  
3,60.888,rs9859804,-0.019  
3,61.004,rs9854002,-0.015  
3,61.073,rs7615307,-0.013  
3,61.108,rs1488092,-0.011  
3,61.131,rs6788290,-0.008  
3,61.215,rs4678837,-0.006  
3,61.271,rs7621380,-0.004  
3,61.397,rs7647352,-0.000  
3,61.463,rs1479151,-0.000  
3,61.531,rs10510683,-0.000  
3,61.944,rs1598529,-0.003  
3,61.958,rs7610107,-0.006  
3,61.960,rs870445,-0.007  
3,62.007,rs6787386,-0.012

3,62.016,rs7645818,-0.013  
3,62.219,rs950146,-0.008  
3,62.294,rs1507881,-0.008  
3,62.312,rs7625360,-0.008  
3,62.359,rs2135951,-0.011  
3,62.381,rs7620657,-0.010  
3,62.462,rs1553656,-0.003  
3,62.465,rs1507882,-0.007  
3,62.730,rs6773378,-0.008  
3,62.776,rs17036373,-0.008  
3,62.782,rs267527,-0.006  
3,62.788,rs6550478,-0.004  
3,62.813,rs267569,-0.004  
3,62.834,rs2844363,-0.001  
3,62.908,rs7373528,-0.001  
3,62.941,rs2685100,-0.001  
3,62.943,rs2685093,-0.001  
3,62.953,rs11129771,-0.003  
3,62.969,rs6796546,-0.004  
3,63.076,rs6599099,-0.001  
3,63.141,rs7744,-0.001  
3,63.216,rs2298419,-0.001  
3,63.231,rs818818,-0.001  
3,63.238,rs171248,-0.002  
3,63.391,rs1002675,-0.003  
3,63.416,rs12636358,-0.003  
3,63.581,rs503327,-0.003  
3,63.639,rs11706270,-0.002  
3,63.844,rs7374540,-0.000  
3,63.866,rs7427874,0.000  
3,63.897,rs6797133,-0.002  
3,63.910,rs9832895,-0.004  
3,63.914,rs6599228,-0.004  
3,63.937,rs6599229,-0.004  
3,63.953,rs13073578,-0.004  
3,64.020,rs13061927,-0.004  
3,64.069,rs7374633,-0.005  
3,64.096,rs6599240,-0.005  
3,64.245,rs9637536,-0.007  
3,64.253,rs7635221,-0.007  
3,64.322,rs9815891,-0.009  
3,64.348,rs11717455,-0.009  
3,64.350,rs11922345,-0.009  
3,64.379,rs2271487,-0.011  
3,64.388,rs4676483,-0.011  
3,64.398,rs3938106,-0.012  
3,64.424,rs4676617,-0.013  
3,64.446,rs11129819,-0.012  
3,64.522,rs630934,-0.007  
3,64.535,rs946411,-0.007  
3,64.539,rs562545,-0.007  
3,64.588,rs13091037,-0.020  
3,64.618,rs9832461,-0.028  
3,64.634,rs2091370,-0.031  
3,64.653,rs9842160,-0.034  
3,64.676,rs7617131,-0.037  
3,64.704,rs1598997,-0.043  
3,64.722,rs9851674,-0.043  
3,64.781,rs2679807,-0.044  
3,64.808,rs2679822,-0.042  
3,64.930,rs4974035,-0.025

3,64.933,rs6762428,-0.025  
3,64.990,rs9875272,-0.021  
3,65.108,rs627998,-0.022  
3,65.121,rs7650433,-0.024  
3,65.122,rs6807519,-0.024  
3,65.231,rs3828363,-0.043  
3,65.245,rs4276160,-0.045  
3,65.257,rs6599132,-0.046  
3,65.275,rs6802872,-0.048  
3,65.335,rs431867,-0.056  
3,65.557,rs3912577,-0.053  
3,65.683,rs7627972,-0.051  
3,65.806,rs3897976,-0.054  
3,65.817,rs1691986,-0.055  
3,66.051,rs900569,-0.058  
3,66.358,rs1979789,-0.057  
3,66.405,rs4682953,-0.066  
3,66.430,rs2290134,-0.072  
3,66.433,rs10865916,-0.072  
3,66.438,rs11928109,-0.072  
3,66.473,rs9311317,-0.071  
3,66.496,rs4683161,-0.070  
3,66.559,rs683887,-0.073  
3,66.650,rs33454,-0.075  
3,66.659,rs26352,-0.076  
3,66.696,rs33484,-0.084  
3,66.713,rs33491,-0.080  
3,66.760,rs2041376,-0.080  
3,66.993,rs11129965,-0.078  
3,67.063,rs342543,-0.076  
3,67.079,rs1876506,-0.077  
3,67.108,rs2267535,-0.080  
3,67.202,rs342521,-0.086  
3,67.323,rs3732860,-0.067  
3,67.335,rs1427800,-0.067  
3,67.540,rs7648947,-0.049  
3,67.566,rs2372342,-0.057  
3,67.578,rs3843370,-0.062  
3,67.601,rs9864154,-0.061  
3,67.701,rs17406718,-0.061  
3,67.714,rs7621298,-0.061  
3,67.946,rs7614885,-0.069  
3,68.116,rs6441791,-0.093  
3,68.149,rs13100389,-0.097  
3,68.158,rs7622411,-0.094  
3,68.208,rs4073774,-0.104  
3,68.303,rs7630503,-0.094  
3,68.421,rs1404481,-0.079  
3,68.480,rs1008369,-0.052  
3,68.484,rs9881814,-0.052  
3,68.501,rs2109409,-0.050  
3,68.501,rs6800118,-0.050  
3,68.510,rs7621857,-0.040  
3,68.522,rs4234441,-0.054  
3,68.537,rs7618961,-0.051  
3,68.550,rs730004,-0.076  
3,68.588,rs9284879,-0.073  
3,68.911,rs6792918,-0.069  
3,69.052,rs9863819,-0.066  
3,69.053,rs2176804,-0.080  
3,69.055,rs6784502,-0.072

3,69.058,rs2037358,-0.056  
3,69.065,rs5007171,-0.083  
3,69.068,rs12494480,-0.071  
3,69.076,rs4682769,-0.065  
3,69.088,rs4683068,-0.048  
3,69.102,rs6767173,-0.041  
3,69.139,rs33780,-0.041  
3,69.176,rs6793847,-0.045  
3,69.190,rs854220,-0.039  
3,69.200,rs13314784,-0.035  
3,69.237,rs9825179,-0.053  
3,69.301,rs10212409,-0.067  
3,69.372,rs2673051,-0.083  
3,69.409,rs2286489,-0.068  
3,69.416,rs758386,-0.077  
3,69.418,rs2531748,-0.079  
3,69.418,rs13067466,-0.079  
3,69.423,rs2159272,-0.078  
3,69.588,rs6772051,-0.070  
3,69.589,rs2888512,-0.070  
3,69.691,rs9990343,-0.076  
3,69.812,rs6791703,-0.097  
3,69.821,rs7648827,-0.099  
3,69.825,rs1879325,-0.098  
3,69.857,rs2139637,-0.091  
3,69.869,rs1520489,-0.097  
3,69.899,rs11718902,-0.099  
3,69.909,rs9814780,-0.104  
3,69.924,rs6801459,-0.112  
3,70.028,rs4683295,-0.158  
3,70.037,rs2385870,-0.158  
3,70.105,rs4078466,-0.161  
3,70.364,rs3732530,-0.163  
3,70.519,rs17729010,-0.165  
3,70.558,rs11130161,-0.165  
3,70.569,rs6779517,-0.166  
3,70.572,rs2362452,-0.166  
3,70.594,rs3895736,-0.159  
3,70.643,rs4955418,-0.146  
3,70.838,rs4625,-0.168  
3,70.935,rs7620081,-0.154  
3,70.942,rs6773188,-0.153  
3,70.996,rs4234645,-0.135  
3,71.072,rs9873175,-0.126  
3,71.096,rs17259762,-0.121  
3,71.354,rs1011063,-0.089  
3,71.534,rs1108842,-0.073  
3,71.691,rs13089851,-0.067  
3,71.825,rs9847710,-0.061  
3,71.873,rs2253685,-0.062  
3,72.149,rs674628,-0.031  
3,72.191,rs555480,-0.031  
3,72.234,rs312487,-0.036  
3,72.243,rs979220,-0.037  
3,72.257,rs13078747,-0.016  
3,72.280,rs17053186,-0.005  
3,72.293,rs807193,-0.009  
3,72.295,rs9311507,-0.010  
3,72.339,rs6786135,-0.006  
3,72.378,rs2680672,-0.005  
3,72.385,rs1380608,-0.005

3,72.394,rs9830632,-0.004  
3,72.414,rs7638857,-0.001  
3,72.443,rs3796347,0.000  
3,72.449,rs1109959,0.000  
3,72.500,rs9835128,0.005  
3,72.513,rs6801605,0.006  
3,72.533,rs6798958,0.003  
3,72.542,rs893367,0.002  
3,72.578,rs6798193,0.003  
3,72.606,rs13064140,0.003  
3,72.616,rs4582049,0.004  
3,72.892,rs2029119,0.023  
3,72.892,rs2029118,0.023  
3,72.947,rs9825725,0.027  
3,73.081,rs9809064,0.054  
3,73.203,rs4244706,0.079  
3,73.221,rs13073263,0.089  
3,73.225,rs4928016,0.089  
3,73.241,rs4928020,0.098  
3,73.319,rs11130409,0.071  
3,73.361,rs7619590,0.075  
3,73.426,rs7427716,0.072  
3,73.514,rs9818348,0.068  
3,73.535,rs11711956,0.068  
3,73.539,rs9811393,0.054  
3,73.838,rs9654001,0.059  
3,73.839,rs6789236,0.059  
3,73.985,rs7614229,0.065  
3,74.027,rs6783107,0.063  
3,74.173,rs7627415,0.051  
3,74.222,rs17054142,0.050  
3,74.236,rs2251788,0.051  
3,74.276,rs6782115,0.052  
3,74.336,rs1851043,0.056  
3,74.353,rs545517,0.058  
3,74.355,rs616788,0.058  
3,74.492,rs1965072,0.073  
3,74.563,rs13095178,0.076  
3,74.597,rs1997463,0.068  
3,74.604,rs13081825,0.067  
3,74.628,rs11130434,0.071  
3,74.634,rs3773605,0.073  
3,74.641,rs1075354,0.075  
3,74.644,rs4955898,0.075  
3,74.841,rs1568983,0.071  
3,75.185,rs6772996,0.050  
3,75.276,rs12487923,0.050  
3,75.282,rs17054609,0.049  
3,75.347,rs358028,0.050  
3,75.368,rs3773554,0.047  
3,75.406,rs358064,0.048  
3,75.448,rs9865871,0.049  
3,75.451,rs358007,0.049  
3,75.484,rs697929,0.049  
3,75.531,rs1388634,0.045  
3,75.629,rs716384,0.059  
3,75.668,rs9818965,0.051  
3,75.750,rs403286,0.049  
3,75.761,rs392699,0.050  
3,75.869,rs358805,0.078  
3,75.916,rs358783,0.102



3,75.930,rs358817,0.102  
3,76.139,rs1879382,0.125  
3,76.157,rs1829555,0.126  
3,76.376,rs1160047,0.157  
3,76.421,rs570374,0.157  
3,76.516,rs11716980,0.202  
3,76.589,rs1126230,0.202  
3,76.702,rs863631,0.174  
3,76.713,rs1994978,0.167  
3,76.772,rs1495371,0.129  
3,76.772,rs815444,0.129  
3,76.854,rs1874311,0.145  
3,77.055,rs2362852,0.176  
3,77.118,rs9827757,0.189  
3,77.400,rs2200432,0.250  
3,77.500,rs6780890,0.260  
3,77.522,rs7646054,0.263  
3,77.559,rs12635549,0.257  
3,77.567,rs1392702,0.255  
3,77.584,rs12638861,0.269  
3,77.596,rs1354034,0.272  
3,77.627,rs7630830,0.247  
3,77.769,rs13070800,0.239  
3,77.780,rs6801254,0.240  
3,77.782,rs17057445,0.240  
3,77.914,rs3924042,0.241  
3,77.948,rs6784399,0.239  
3,77.986,rs11922193,0.267  
3,78.033,rs7622066,0.304  
3,78.045,rs9830791,0.313  
3,78.081,rs7612293,0.333  
3,78.173,rs12495640,0.352  
3,78.264,rs6445860,0.344  
3,78.677,rs2121743,0.379  
3,78.811,rs7646913,0.379  
3,78.819,rs4530498,0.378  
3,78.910,rs11720285,0.403  
3,78.921,rs3773008,0.413  
3,78.950,rs4681688,0.384  
3,78.950,rs9853873,0.382  
3,78.954,rs4387990,0.364  
3,78.962,rs4681869,0.311  
3,78.965,rs7652223,0.300  
3,78.966,rs13080308,0.298  
3,78.968,rs11710358,0.294  
3,78.969,rs6762192,0.295  
3,79.011,rs1373403,0.300  
3,79.085,rs4681901,0.319  
3,79.221,rs17059955,0.336  
3,79.429,rs1567728,0.334  
3,79.545,rs9880478,0.323  
3,79.632,rs2197311,0.314  
3,79.721,rs6808731,0.304  
3,79.741,rs1443941,0.305  
3,79.884,rs9850077,0.342  
3,79.917,rs962791,0.316  
3,79.979,rs6762062,0.334  
3,80.007,rs10454231,0.323  
3,80.022,rs9870523,0.324  
3,80.090,rs9840238,0.335  
3,80.093,rs734184,0.335

3,80.097,rs6791284,0.306  
3,80.228,rs6763159,0.289  
3,80.263,rs1281465,0.284  
3,80.288,rs7634315,0.291  
3,80.329,rs6766124,0.291  
3,80.383,rs1947152,0.289  
3,80.383,rs1456155,0.289  
3,80.488,rs517644,0.309  
3,80.492,rs1485718,0.310  
3,80.513,rs780354,0.320  
3,80.551,rs12634148,0.361  
3,80.583,rs6778206,0.380  
3,80.603,rs689497,0.382  
3,80.690,rs646372,0.395  
3,80.783,rs9864403,0.383  
3,80.787,rs7641743,0.382  
3,80.846,rs2366968,0.385  
3,80.872,rs3796193,0.386  
3,80.901,rs9862003,0.387  
3,81.032,rs4679627,0.377  
3,81.039,rs17061792,0.381  
3,81.064,rs6794968,0.390  
3,81.126,rs169841,0.478  
3,81.132,rs9860107,0.482  
3,81.260,rs13317306,0.553  
3,81.333,rs7623479,0.552  
3,81.347,rs5014208,0.562  
3,81.367,rs2064020,0.567  
3,81.487,rs213299,0.595  
3,81.491,rs213307,0.596  
3,81.619,rs169913,0.627  
3,81.676,rs213354,0.624  
3,81.697,rs9879860,0.624  
3,81.761,rs7644138,0.629  
3,81.763,rs4679531,0.630  
3,81.778,rs186154,0.632  
3,81.858,rs6764498,0.628  
3,81.885,rs6784469,0.664  
3,81.886,rs6773500,0.666  
3,81.886,rs965033,0.670  
3,81.890,rs6782631,0.745  
3,81.925,rs2687163,0.797  
3,81.982,rs7618479,0.901  
3,82.030,rs151743,0.998  
3,82.032,rs241693,0.950  
3,82.211,rs2197751,0.737  
3,82.275,rs2017941,0.737  
3,82.295,rs17063425,0.735  
3,82.420,rs241671,0.726  
3,82.490,rs17063532,0.716  
3,82.495,rs3937353,0.712  
3,82.531,rs6785709,0.664  
3,82.595,rs11720214,0.537  
3,82.675,rs11926787,0.493  
3,82.747,rs2856076,0.509  
3,82.847,rs12633258,0.485  
3,83.023,rs7636357,0.447  
3,83.066,rs17031633,0.463  
3,83.082,rs6783059,0.469  
3,83.086,rs3920477,0.461  
3,83.100,rs6446152,0.434

3,83.112,rs9311779,0.420  
3,83.297,rs2736736,0.449  
3,83.350,rs2594139,0.443  
3,83.578,rs6768425,0.502  
3,83.586,rs17683604,0.505  
3,83.627,rs1562525,0.521  
3,83.645,rs6414610,0.530  
3,83.652,rs6776499,0.533  
3,83.674,rs13087545,0.530  
3,83.709,rs1898749,0.514  
3,83.933,rs815710,0.482  
3,83.958,rs9812140,0.489  
3,83.967,rs6784508,0.480  
3,83.977,rs7625594,0.483  
3,83.987,rs12490142,0.486  
3,84.063,rs11130841,0.511  
3,84.088,rs1453754,0.513  
3,84.103,rs9311811,0.513  
3,84.110,rs1453758,0.513  
3,84.157,rs7616413,0.508  
3,84.209,rs938959,0.386  
3,84.217,rs7643514,0.381  
3,84.218,rs1317639,0.380  
3,84.261,rs1320234,0.347  
3,84.279,rs6807692,0.339  
3,84.282,rs13064689,0.338  
3,84.307,rs6787964,0.307  
3,84.311,rs4688268,0.279  
3,84.339,rs1915992,0.269  
3,84.387,rs7648560,0.252  
3,84.421,rs1980283,0.236  
3,84.527,rs7630364,0.216  
3,84.563,rs1006588,0.234  
3,84.564,rs40494,0.232  
3,84.578,rs251039,0.207  
3,84.581,rs13085295,0.199  
3,84.640,rs7637925,0.147  
3,84.651,rs7647357,0.151  
3,84.662,rs9311835,0.146  
3,84.677,rs9879067,0.138  
3,84.707,rs886562,0.117  
3,84.739,rs880417,0.107  
3,84.750,rs6764198,0.103  
3,84.804,rs7627359,0.110  
3,84.858,rs10510873,0.121  
3,85.001,rs6445263,0.151  
3,85.021,rs11130880,0.160  
3,85.056,rs17066359,0.191  
3,85.058,rs1979673,0.199  
3,85.064,rs6777784,0.226  
3,85.070,rs6445266,0.232  
3,85.098,rs9857515,0.277  
3,85.120,rs2251423,0.306  
3,85.176,rs833649,0.264  
3,85.191,rs2659467,0.262  
3,85.266,rs1567092,0.241  
3,85.270,rs6772352,0.242  
3,85.386,rs4688305,0.271  
3,85.389,rs6445281,0.272  
3,85.510,rs1658789,0.315  
3,85.663,rs17067195,0.358

3,85.716,rs13077848,0.373  
3,85.724,rs6769778,0.374  
3,85.756,rs304180,0.368  
3,85.766,rs13325109,0.368  
3,85.899,rs17358923,0.362  
3,85.913,rs6796067,0.365  
3,86.014,rs12631887,0.388  
3,86.220,rs6445307,0.395  
3,86.370,rs1900585,0.394  
3,86.420,rs9848161,0.383  
3,86.587,rs9311860,0.344  
3,86.612,rs7631923,0.333  
3,86.802,rs9829816,0.246  
3,86.876,rs17068484,0.269  
3,86.889,rs1901304,0.272  
3,86.941,rs6445345,0.319  
3,86.968,rs4688398,0.320  
3,86.970,rs6806334,0.324  
3,87.038,rs6765108,0.465  
3,87.085,rs11708840,0.453  
3,87.086,rs11918416,0.454  
3,87.086,rs17068891,0.454  
3,87.092,rs11708252,0.450  
3,87.123,rs1505597,0.419  
3,87.133,rs4688173,0.414  
3,87.140,rs1394900,0.409  
3,87.186,rs6809477,0.377  
3,87.270,rs7646765,0.353  
3,87.278,rs964902,0.350  
3,87.358,rs1390442,0.369  
3,87.364,rs4583650,0.357  
3,87.370,rs7629447,0.287  
3,87.506,rs1472337,0.261  
3,87.511,rs9859821,0.261  
3,88.129,rs696010,0.253  
3,88.146,rs1835898,0.230  
3,88.162,rs697270,0.213  
3,88.173,rs753562,0.212  
3,88.195,rs184452,0.212  
3,88.233,rs153717,0.229  
3,88.279,rs17070461,0.235  
3,88.407,rs4234676,0.331  
3,88.592,rs4327386,0.279  
3,88.634,rs6787443,0.268  
3,88.648,rs2371358,0.384  
3,88.660,rs4488822,0.375  
3,88.701,rs2888015,0.353  
3,88.819,rs7627455,0.351  
3,88.922,rs6771712,0.320  
3,89.033,rs9830450,0.286  
3,89.057,rs9855230,0.283  
3,89.075,rs7635505,0.282  
3,89.080,rs9836710,0.253  
3,89.089,rs9820318,0.257  
3,89.143,rs4688500,0.282  
3,89.237,rs17727064,0.281  
3,89.317,rs17334102,0.318  
3,89.886,rs9311929,0.313  
3,90.013,rs2128406,0.310  
3,90.068,rs931233,0.315  
3,90.146,rs17072628,0.315

3,90.149,rs1479950,0.316  
3,90.166,rs6770043,0.317  
3,90.168,rs17415670,0.316  
3,90.188,rs9875900,0.312  
3,90.214,rs13086188,0.300  
3,90.239,rs1318477,0.276  
3,90.252,rs9859944,0.266  
3,90.326,rs6778911,0.210  
3,90.328,rs12493497,0.209  
3,90.330,rs7428806,0.208  
3,90.407,rs17430548,0.174  
3,90.424,rs1554664,0.167  
3,90.484,rs1917524,0.153  
3,90.522,rs4407359,0.142  
3,90.626,rs11714649,0.133  
3,90.633,rs7610241,0.131  
3,90.653,rs2047533,0.129  
3,90.690,rs1495453,0.124  
3,90.725,rs2643723,0.109  
3,90.730,rs17295791,0.108  
3,90.733,rs1108718,0.108  
3,90.747,rs10510946,0.111  
3,90.784,rs2643727,0.124  
3,90.821,rs1552966,0.115  
3,90.884,rs1430416,0.141  
3,90.904,rs7620106,0.164  
3,91.362,rs13874,0.111  
3,91.380,rs332367,0.112  
3,91.535,rs6549120,0.116  
3,91.698,rs6789596,0.088  
3,91.730,rs4241442,0.083  
3,91.923,rs17044868,0.097  
3,91.926,rs1456916,0.097  
3,92.043,rs11711551,0.097  
3,92.047,rs1001763,0.109  
3,92.058,rs9862866,0.110  
3,92.272,rs7646301,0.096  
3,92.327,rs9843859,0.096  
3,92.334,rs6796957,0.095  
3,92.437,rs4487196,0.094  
3,92.483,rs6776236,0.115  
3,92.568,rs9814525,0.123  
3,92.609,rs6765905,0.131  
3,92.628,rs7609636,0.128  
3,92.650,rs4347959,0.131  
3,92.714,rs7611269,0.137  
3,92.766,rs1979639,0.165  
3,92.769,rs11923377,0.186  
3,92.771,rs2101566,0.199  
3,92.772,rs1352658,0.202  
3,92.786,rs4450832,0.257  
3,92.795,rs4856863,0.306  
3,92.891,rs2250952,0.261  
3,92.917,rs7646094,0.260  
3,92.995,rs6548756,0.258  
3,93.011,rs4856894,0.257  
3,93.011,rs4331688,0.257  
3,93.026,rs6789499,0.264  
3,93.165,rs6548962,0.284  
3,93.212,rs1007583,0.280  
3,93.241,rs4311217,0.259

3,93.264,rs10440086,0.253  
3,93.272,rs9826468,0.250  
3,93.273,rs2313273,0.269  
3,93.273,rs6549098,0.276  
3,93.278,rs17231705,0.265  
3,93.280,rs9837363,0.261  
3,93.296,rs1491758,0.238  
3,93.346,rs9833308,0.272  
3,93.413,rs17047811,0.310  
3,93.420,rs6770575,0.311  
3,93.424,rs872114,0.311  
3,93.585,rs2171871,0.278  
3,93.605,rs17048119,0.279  
3,93.610,rs17048130,0.279  
3,93.711,rs12714750,0.274  
3,93.719,rs7038,0.299  
3,93.753,rs4282064,0.279  
3,93.758,rs6787362,0.276  
3,93.783,rs9840469,0.225  
3,93.787,rs4530530,0.224  
3,93.802,rs17005571,0.215  
3,93.808,rs2046374,0.211  
3,93.821,rs9813130,0.201  
3,93.862,rs7635662,0.145  
3,93.865,rs2128972,0.145  
3,93.871,rs981054,0.144  
3,93.878,rs7643187,0.142  
3,93.896,rs6795389,0.139  
3,93.927,rs17006013,0.136  
3,93.930,rs1995178,0.136  
3,93.959,rs4855413,0.129  
3,93.959,rs7653611,0.129  
3,93.994,rs6773506,0.114  
3,94.024,rs12631428,0.114  
3,94.043,rs17006368,0.114  
3,94.056,rs6794315,0.113  
3,94.142,rs1367370,0.125  
3,94.178,rs2320172,0.125  
3,94.332,rs9310179,0.125  
3,94.338,rs6809108,0.124  
3,94.606,rs7430272,0.108  
3,94.639,rs6790613,0.110  
3,94.670,rs13089371,0.109  
3,94.709,rs6549329,0.087  
3,94.823,rs805478,0.077  
3,94.847,rs9831386,0.066  
3,94.861,rs13070827,0.063  
3,94.900,rs7432792,0.069  
3,95.058,rs6762974,0.065  
3,95.076,rs11128181,0.065  
3,95.123,rs7628382,0.060  
3,95.200,rs10511006,0.052  
3,95.354,rs6763648,0.037  
3,95.459,rs2573174,0.035  
3,95.614,rs9847154,0.031  
3,95.838,rs831438,0.013  
3,95.869,rs9856263,0.012  
3,95.904,rs11923661,0.010  
3,95.917,rs10511014,0.008  
3,95.943,rs4677029,0.009  
3,95.967,rs2037474,0.008

3,95.995,rs6549383,0.007  
3,96.012,rs880543,0.001  
3,96.066,rs2280518,0.004  
3,96.073,rs1288696,0.005  
3,96.103,rs17008474,0.002  
3,96.184,rs13072512,-0.000  
3,96.206,rs6549387,-0.000  
3,96.210,rs10470554,0.000  
3,96.285,rs6771130,0.002  
3,96.526,rs830617,-0.001  
3,96.531,rs1288124,-0.001  
3,96.533,rs7612407,-0.000  
3,96.548,rs9872923,0.001  
3,96.557,rs11710870,0.000  
3,96.563,rs704275,0.001  
3,96.580,rs704285,0.001  
3,96.604,rs3796226,-0.000  
3,96.609,rs6767160,-0.001  
3,96.633,rs6804667,-0.004  
3,96.710,rs1374912,-0.005  
3,96.723,rs6782813,-0.004  
3,96.733,rs1320015,-0.004  
3,96.796,rs1316318,-0.001  
3,96.806,rs10514728,-0.001  
3,96.828,rs6770667,-0.001  
3,97.130,rs1995453,-0.002  
3,97.136,rs7624088,-0.002  
3,97.180,rs4234146,-0.004  
3,97.268,rs11706411,-0.006  
3,97.284,rs9880789,-0.006  
3,97.485,rs9829101,-0.003  
3,97.624,rs9874496,-0.003  
3,97.982,rs6549439,-0.002  
3,98.065,rs4677097,0.001  
3,98.176,rs9865222,0.003  
3,98.190,rs4677105,0.003  
3,98.227,rs6784559,0.006  
3,98.237,rs11707718,0.008  
3,98.249,rs9829428,0.010  
3,98.561,rs9878609,0.006  
3,98.609,rs9815397,0.006  
3,98.657,rs7642076,0.011  
3,98.719,rs9847707,0.012  
3,98.856,rs11920844,0.021  
3,98.913,rs9815886,0.016  
3,98.975,rs11915307,0.016  
3,99.269,rs2028241,0.020  
3,99.275,rs11128275,0.020  
3,99.357,rs9849164,0.020  
3,99.366,rs4074154,0.020  
3,99.500,rs2029507,0.033  
3,99.537,rs17677643,0.045  
3,99.596,rs4677197,0.049  
3,99.620,rs17010036,0.051  
3,99.627,rs4677201,0.052  
3,99.684,rs2322573,0.056  
3,99.765,rs9985487,0.068  
3,99.903,rs7632726,0.098  
3,100.073,rs4676894,0.087  
3,100.318,rs13099810,0.072  
3,100.536,rs1060584,0.070

3,100.784,rs17694568,0.076  
3,100.802,rs9850430,0.081  
3,100.811,rs6775039,0.100  
3,100.828,rs4676904,0.103  
3,100.846,rs2035580,0.105  
3,100.859,rs7618585,0.079  
3,100.894,rs7633357,0.072  
3,100.976,rs1107251,0.083  
3,100.990,rs6784750,0.085  
3,101.068,rs7619189,0.091  
3,101.134,rs3901920,0.115  
3,101.170,rs11128329,0.124  
3,101.213,rs7064,0.117  
3,101.218,rs6787588,0.118  
3,101.435,rs6783760,0.120  
3,101.544,rs4535167,0.124  
3,101.680,rs9879918,0.090  
3,101.803,rs9310279,0.084  
3,101.901,rs1949120,0.075  
3,101.962,rs17756459,0.069  
3,101.968,rs3856583,0.070  
3,102.008,rs291477,0.083  
3,102.070,rs484332,0.074  
3,102.087,rs291516,0.070  
3,102.135,rs6796430,0.047  
3,102.158,rs291485,0.042  
3,102.200,rs4677353,0.035  
3,102.334,rs6785650,0.018  
3,102.354,rs1405402,0.024  
3,102.440,rs4416330,0.019  
3,102.542,rs9990420,0.015  
3,102.566,rs6800733,0.017  
3,102.638,rs1526710,0.022  
3,102.686,rs6549582,0.026  
3,102.781,rs6799162,0.035  
3,102.811,rs4234186,0.038  
3,102.824,rs35961,0.040  
3,102.841,rs541653,0.039  
3,102.850,rs862825,0.031  
3,102.855,rs9867036,0.026  
3,102.866,rs529655,0.025  
3,102.885,rs549560,0.021  
3,102.886,rs551595,0.021  
3,102.922,rs4073942,0.022  
3,102.949,rs7430250,0.029  
3,102.955,rs7635421,0.031  
3,102.963,rs9830820,0.034  
3,103.007,rs11928037,0.036  
3,103.131,rs7651319,0.041  
3,103.433,rs6768580,0.103  
3,103.435,rs12490683,0.103  
3,103.674,rs3887345,0.158  
3,103.762,rs9310350,0.216  
3,103.779,rs4095546,0.198  
3,103.791,rs7642330,0.198  
3,103.842,rs9868043,0.198  
3,103.875,rs2126536,0.169  
3,103.876,rs11128503,0.168  
3,104.058,rs9882550,0.148  
3,104.059,rs7612860,0.148  
3,104.094,rs7431017,0.157



3,104.151,rs6793784,0.117  
3,104.223,rs1816955,0.100  
3,104.246,rs9851014,0.100  
3,104.288,rs264553,0.094  
3,104.445,rs1146013,0.076  
3,104.474,rs6775462,0.072  
3,104.532,rs1166981,0.066  
3,104.535,rs11127568,0.066  
3,104.592,rs9827948,0.068  
3,104.635,rs9850420,0.059  
3,104.697,rs6786589,0.054  
3,104.807,rs4459934,0.052  
3,104.828,rs9816491,0.047  
3,104.910,rs7615545,0.018  
3,104.925,rs7432300,0.017  
3,104.986,rs1110226,0.019  
3,105.090,rs9882239,0.023  
3,105.100,rs10511057,0.023  
3,105.106,rs7433256,0.023  
3,105.109,rs2875436,0.023  
3,105.193,rs4449296,0.021  
3,105.272,rs7432690,0.036  
3,105.351,rs9872416,0.038  
3,105.356,rs2166802,0.038  
3,105.640,rs1178778,0.033  
3,105.658,rs9883373,0.030  
3,105.703,rs776122,0.023  
3,105.709,rs12634677,0.021  
3,105.927,rs6793440,0.002  
3,106.019,rs7615248,0.001  
3,106.256,rs7645598,0.001  
3,106.453,rs7645322,0.001  
3,106.471,rs6775945,0.001  
3,106.518,rs1512487,0.002  
3,106.624,rs9309797,0.003  
3,106.772,rs7650723,0.006  
3,106.775,rs9866490,0.006  
3,106.880,rs9876636,0.011  
3,106.932,rs2660739,0.014  
3,107.029,rs2304503,0.022  
3,107.057,rs333472,0.016  
3,107.125,rs1737726,0.010  
3,107.180,rs498805,0.007  
3,107.189,rs9832632,0.006  
3,107.212,rs6766522,0.005  
3,107.242,rs9866364,0.008  
3,107.317,rs9832396,0.004  
3,107.336,rs7622139,0.003  
3,107.345,rs1387665,0.003  
3,107.420,rs9863111,0.001  
3,107.430,rs4680967,0.001  
3,107.464,rs6775791,0.003  
3,107.505,rs2639256,0.012  
3,107.509,rs1370894,0.012  
3,107.514,rs2639229,0.015  
3,107.518,rs2372752,0.017  
3,107.524,rs10865593,0.018  
3,107.530,rs7611835,0.016  
3,107.540,rs11714085,0.010  
3,107.546,rs7645184,0.010  
3,107.548,rs1461616,0.010

3,107.549,rs6778246,0.016  
3,107.787,rs3772902,0.018  
3,107.933,rs17019353,0.018  
3,108.059,rs9875387,0.016  
3,108.424,rs6780231,0.003  
3,108.425,rs17021121,0.003  
3,108.474,rs6767473,0.000  
3,108.487,rs9837479,-0.000  
3,108.561,rs7618782,-0.000  
3,108.626,rs1551213,0.000  
3,108.634,rs7622240,0.000  
3,108.677,rs9867437,0.002  
3,108.680,rs9810211,0.002  
3,108.754,rs9861174,0.000  
3,108.768,rs2875492,0.000  
3,108.902,rs1512935,0.000  
3,109.150,rs725579,0.000  
3,109.178,rs17181079,0.000  
3,109.202,rs17024019,-0.001  
3,109.207,rs904115,-0.001  
3,109.261,rs9846815,-0.001  
3,109.290,rs6793602,-0.002  
3,109.356,rs6799017,-0.001  
3,109.491,rs6788125,-0.000  
3,109.636,rs936361,-0.001  
3,109.653,rs17025629,-0.001  
3,109.680,rs9874688,-0.002  
3,109.728,rs7645228,-0.003  
3,109.886,rs7638288,-0.004  
3,109.942,rs11914750,-0.004  
3,109.981,rs1496515,-0.004  
3,110.021,rs1040017,-0.004  
3,110.079,rs7372560,-0.006  
3,110.266,rs9681884,-0.023  
3,110.292,rs4857329,-0.025  
3,110.297,rs6771948,-0.025  
3,110.299,rs16843322,-0.023  
3,110.301,rs9871395,-0.021  
3,110.307,rs4857458,-0.014  
3,110.330,rs8180036,-0.013  
3,110.331,rs3905886,-0.014  
3,110.332,rs7612444,-0.014  
3,110.346,rs520258,-0.014  
3,110.366,rs1397977,-0.014  
3,110.374,rs9863045,-0.016  
3,110.377,rs4857185,-0.016  
3,110.382,rs10511153,-0.017  
3,110.384,rs1514422,-0.019  
3,110.385,rs6800770,-0.029  
3,110.390,rs9289152,-0.029  
3,110.401,rs937878,-0.025  
3,110.415,rs6767738,-0.019  
3,110.417,rs7614446,-0.018  
3,110.432,rs9843787,-0.015  
3,110.438,rs1545127,-0.014  
3,110.439,rs301927,-0.014  
3,110.442,rs719278,-0.006  
3,110.484,rs4857302,-0.006  
3,110.516,rs7638369,-0.008  
3,110.552,rs695229,-0.002  
3,110.566,rs12054461,-0.003

3,110.570,rs4518168,-0.003  
3,110.674,rs17195199,-0.009  
3,110.776,rs9857087,-0.007  
3,110.808,rs10511167,-0.007  
3,110.819,rs1529045,-0.007  
3,110.831,rs1529047,-0.007  
3,110.840,rs9289628,-0.007  
3,110.936,rs4857414,-0.007  
3,111.091,rs2062059,-0.007  
3,111.249,rs1879376,-0.008  
3,111.253,rs4928176,-0.008  
3,111.428,rs2089983,-0.015  
3,111.501,rs13059876,-0.017  
3,111.552,rs704574,-0.018  
3,111.820,rs6772774,-0.017  
3,111.860,rs9881690,-0.058  
3,111.865,rs1828669,-0.060  
3,111.866,rs1707574,-0.063  
3,111.871,rs1606462,-0.065  
3,111.924,rs771767,-0.076  
3,111.944,rs771809,-0.073  
3,111.969,rs1877818,-0.070  
3,111.976,rs12486534,-0.054  
3,111.987,rs16844748,-0.056  
3,112.026,rs2619284,-0.063  
3,112.047,rs11927186,-0.065  
3,112.166,rs985374,-0.057  
3,112.236,rs6794388,-0.057  
3,112.298,rs1620217,-0.060  
3,112.586,rs1241287,-0.073  
3,112.783,rs10937285,-0.106  
3,112.928,rs7639547,-0.098  
3,112.956,rs9862353,-0.103  
3,112.982,rs6792532,-0.085  
3,113.023,rs4314176,-0.088  
3,113.049,rs9851044,-0.079  
3,113.206,rs16846607,-0.135  
3,113.215,rs16846615,-0.137  
3,113.346,rs9825206,-0.146  
3,113.380,rs1379627,-0.137  
3,113.393,rs7634768,-0.133  
3,113.408,rs2166826,-0.129  
3,113.417,rs7628112,-0.129  
3,113.441,rs6804331,-0.122  
3,113.474,rs1666559,-0.117  
3,113.527,rs1104964,-0.183  
3,113.560,rs2895264,-0.188  
3,113.607,rs9833635,-0.191  
3,113.677,rs13061353,-0.189  
3,113.802,rs7648727,-0.164  
3,113.807,rs6776313,-0.163  
3,113.836,rs9848965,-0.156  
3,113.861,rs6437533,-0.153  
3,113.930,rs3996202,-0.144  
3,113.959,rs12635480,-0.126  
3,113.963,rs13061652,-0.122  
3,113.984,rs1436349,-0.123  
3,113.992,rs12486139,-0.123  
3,114.072,rs9819891,-0.133  
3,114.075,rs1503079,-0.132  
3,114.144,rs9861329,-0.161

3,114.152,rs6770943,-0.170  
3,114.169,rs7626224,-0.181  
3,114.201,rs1716127,-0.210  
3,114.214,rs7624664,-0.220  
3,114.240,rs6437577,-0.269  
3,114.298,rs4894924,-0.285  
3,114.356,rs6769329,-0.311  
3,114.380,rs3772554,-0.326  
3,114.392,rs1546733,-0.329  
3,114.536,rs2174233,-0.325  
3,114.555,rs1503920,-0.321  
3,114.562,rs2618316,-0.324  
3,114.603,rs7632765,-0.357  
3,114.651,rs17201890,-0.354  
3,114.755,rs7620758,-0.318  
3,114.759,rs6437662,-0.312  
3,114.782,rs7616267,-0.279  
3,114.792,rs1031170,-0.270  
3,114.797,rs722813,-0.294  
3,114.801,rs968072,-0.275  
3,114.802,rs1445076,-0.276  
3,114.871,rs2399106,-0.355  
3,114.898,rs12633892,-0.387  
3,114.913,rs11928487,-0.406  
3,114.925,rs2399114,-0.447  
3,115.017,rs709570,-0.460  
3,115.147,rs6781540,-0.406  
3,115.286,rs9867707,-0.371  
3,115.304,rs7430092,-0.368  
3,115.308,rs1881309,-0.367  
3,115.311,rs11915523,-0.366  
3,115.357,rs1283098,-0.351  
3,115.389,rs13326490,-0.338  
3,115.450,rs2676364,-0.311  
3,115.523,rs793556,-0.303  
3,115.739,rs9851055,-0.254  
3,115.760,rs696377,-0.227  
3,115.808,rs643938,-0.254  
3,115.914,rs923952,-0.261  
3,115.962,rs10933925,-0.236  
3,115.965,rs1437238,-0.232  
3,115.989,rs840281,-0.206  
3,116.016,rs9845309,-0.234  
3,116.052,rs696375,-0.262  
3,116.054,rs9859911,-0.261  
3,116.240,rs326352,-0.228  
3,116.631,rs2290600,-0.203  
3,116.683,rs9810676,-0.202  
3,117.003,rs11922147,-0.229  
3,117.295,rs3762793,-0.255  
3,117.321,rs11919162,-0.232  
3,117.344,rs7609997,-0.221  
3,117.374,rs2399248,-0.240  
3,117.380,rs4855675,-0.248  
3,117.381,rs9875407,-0.250  
3,117.483,rs4555525,-0.277  
3,117.537,rs6774626,-0.273  
3,117.562,rs6807870,-0.270  
3,117.577,rs2673391,-0.267  
3,117.581,rs1163391,-0.267  
3,117.592,rs9876733,-0.265

3,117.610,rs11712428,-0.260  
3,117.915,rs1403250,-0.273  
3,118.310,rs6797827,-0.284  
3,118.386,rs1915337,-0.288  
3,118.412,rs694022,-0.289  
3,118.610,rs605795,-0.285  
3,118.652,rs12634736,-0.240  
3,118.659,rs2399328,-0.236  
3,118.678,rs1606368,-0.222  
3,118.818,rs1512516,-0.200  
3,118.962,rs1903678,-0.171  
3,119.013,rs9873710,-0.185  
3,119.020,rs1462307,-0.186  
3,119.078,rs2399346,-0.134  
3,119.109,rs10514755,-0.122  
3,119.110,rs6763050,-0.122  
3,119.265,rs4682242,-0.102  
3,119.266,rs7432694,-0.102  
3,119.289,rs2932054,-0.099  
3,119.300,rs2958089,-0.097  
3,119.313,rs12637512,-0.095  
3,119.358,rs2950985,-0.089  
3,119.428,rs2173318,-0.080  
3,119.507,rs951338,-0.081  
3,119.536,rs6790722,-0.081  
3,119.541,rs4682314,-0.081  
3,119.542,rs4349472,-0.081  
3,119.608,rs13091880,-0.099  
3,119.619,rs6804475,-0.093  
3,119.645,rs774757,-0.056  
3,119.660,rs4386465,-0.057  
3,119.678,rs191454,-0.066  
3,119.704,rs9835431,-0.057  
3,119.784,rs12491414,-0.063  
3,119.809,rs1050572,-0.066  
3,119.822,rs1879512,-0.068  
3,119.826,rs6438069,-0.069  
3,119.827,rs1032239,-0.069  
3,119.830,rs9851461,-0.069  
3,119.838,rs999802,-0.069  
3,119.865,rs1982809,-0.075  
3,119.866,rs2171513,-0.075  
3,119.937,rs4290780,-0.074  
3,119.955,rs7620601,-0.073  
3,119.990,rs6438101,-0.062  
3,119.997,rs2399460,-0.039  
3,120.008,rs10934215,-0.030  
3,120.029,rs11923603,-0.010  
3,120.036,rs953201,-0.006  
3,120.041,rs972554,-0.004  
3,120.047,rs9288979,-0.004  
3,120.049,rs904626,-0.005  
3,120.050,rs16860670,-0.004  
3,120.053,rs6769798,-0.001  
3,120.141,rs6775574,-0.000  
3,120.302,rs13092825,-0.000  
3,120.330,rs2669910,-0.000  
3,120.337,rs13070953,-0.000  
3,120.340,rs3773688,-0.000  
3,120.356,rs950357,-0.002  
3,120.484,rs12695294,-0.014

3,120.552,rs2566980,-0.013  
3,120.564,rs1025398,-0.011  
3,120.569,rs2712355,-0.012  
3,120.585,rs16861409,-0.009  
3,120.595,rs6438175,-0.009  
3,120.651,rs6438180,-0.008  
3,120.706,rs6280,-0.006  
3,120.711,rs6787134,-0.005  
3,120.734,rs2062834,-0.004  
3,120.765,rs17607135,-0.006  
3,120.783,rs2693039,-0.008  
3,120.805,rs9881461,-0.011  
3,120.813,rs10511330,-0.012  
3,120.814,rs2733403,-0.012  
3,120.833,rs9882269,-0.013  
3,120.848,rs2718424,-0.017  
3,120.853,rs2718425,-0.018  
3,120.885,rs7615798,-0.024  
3,120.889,rs2953676,-0.025  
3,120.899,rs7637678,-0.032  
3,121.198,rs9289008,-0.038  
3,121.403,rs4831217,-0.031  
3,121.681,rs10511343,-0.024  
3,121.719,rs9849343,-0.032  
3,121.734,rs16823858,-0.037  
3,121.756,rs7611310,-0.044  
3,121.762,rs10934299,-0.044  
3,121.767,rs736884,-0.043  
3,121.793,rs7634702,-0.036  
3,121.801,rs9848541,-0.035  
3,121.827,rs714697,-0.028  
3,121.839,rs9879241,-0.025  
3,121.848,rs10934301,-0.023  
3,121.868,rs2164930,-0.023  
3,121.872,rs3772917,-0.021  
3,121.885,rs9858175,-0.018  
3,121.900,rs2972474,-0.013  
3,122.027,rs2289271,0.000  
3,122.095,rs1516519,0.005  
3,122.103,rs10511351,0.003  
3,122.106,rs9830559,0.003  
3,122.117,rs17712069,0.003  
3,122.138,rs7612435,0.005  
3,122.174,rs4240161,0.018  
3,122.195,rs6769601,0.021  
3,122.462,rs4296590,0.034  
3,122.543,rs1401069,0.032  
3,122.550,rs1518321,0.027  
3,122.558,rs7640361,0.030  
3,122.575,rs9841113,0.013  
3,122.622,rs10934369,0.012  
3,122.623,rs10511360,0.012  
3,122.663,rs7627376,0.011  
3,122.704,rs7613406,0.010  
3,122.788,rs1133604,0.012  
3,122.811,rs3842972,0.008  
3,122.855,rs4855890,0.003  
3,122.901,rs869407,0.003  
3,122.941,rs7653706,0.004  
3,122.946,rs12493930,0.004  
3,122.967,rs9289071,0.012

3,122.978,rs9836910,0.013  
3,122.981,rs9810432,0.013  
3,122.992,rs6784605,0.010  
3,122.993,rs1818768,0.010  
3,122.999,rs9844832,0.009  
3,123.025,rs4145154,0.019  
3,123.139,rs938170,0.026  
3,123.168,rs3849471,0.028  
3,123.183,rs4855941,0.036  
3,123.217,rs6800555,0.050  
3,123.322,rs6797385,0.042  
3,123.338,rs6806321,0.040  
3,123.372,rs16826997,0.038  
3,123.392,rs2927280,0.036  
3,123.395,rs16827045,0.038  
3,123.412,rs9830523,0.052  
3,123.429,rs4616651,0.068  
3,123.439,rs2927271,0.072  
3,123.461,rs6783096,0.068  
3,123.638,rs7646668,0.042  
3,123.767,rs13066603,0.042  
3,124.179,rs1392265,0.057  
3,124.557,rs12636589,0.066  
3,124.627,rs9846915,0.068  
3,125.439,rs9817827,0.064  
3,125.482,rs17202866,0.063  
3,125.495,rs6765745,0.064  
3,125.507,rs4687935,0.065  
3,125.610,rs705236,0.063  
3,125.801,rs1081896,0.063  
3,125.809,rs7625631,0.063  
3,125.944,rs1879553,0.062  
3,125.950,rs1521293,0.062  
3,126.322,rs11925868,0.026  
3,126.472,rs9878040,0.015  
3,126.570,rs6795868,0.014  
3,126.612,rs13099637,0.016  
3,126.626,rs1259475,0.018  
3,126.717,rs12489104,0.014  
3,126.754,rs373188,0.011  
3,126.760,rs12629908,0.011  
3,126.766,rs2016491,0.011  
3,126.771,rs10049328,0.011  
3,126.854,rs1403719,0.013  
3,126.891,rs9848328,0.016  
3,126.910,rs9289163,0.012  
3,126.993,rs790125,0.004  
3,127.112,rs9812646,0.003  
3,127.113,rs9855669,0.003  
3,127.278,rs4478030,0.005  
3,127.287,rs9816759,0.003  
3,127.293,rs4234209,0.002  
3,127.306,rs998945,0.001  
3,127.373,rs12485921,0.000  
3,127.378,rs6809947,0.000  
3,127.422,rs1078982,0.000  
3,127.443,rs9820435,0.000  
3,127.460,rs1976716,0.000  
3,127.474,rs870429,0.000  
3,127.657,rs9289218,0.012  
3,127.748,rs9841477,0.017

3,127.786,rs9861395,0.018  
3,128.124,rs11709947,0.016  
3,128.148,rs820360,0.017  
3,128.263,rs9283570,0.031  
3,128.282,rs11718105,0.033  
3,128.402,rs2124508,0.038  
3,128.731,rs17310770,0.048  
3,129.224,rs895062,0.065  
3,129.261,rs756037,0.064  
3,129.546,rs661798,0.050  
3,129.571,rs2289845,0.050  
3,129.648,rs2289839,0.052  
3,129.672,rs7623685,0.051  
3,129.740,rs556031,0.041  
3,130.071,rs1501187,0.056  
3,130.087,rs333284,0.057  
3,130.128,rs3863064,0.057  
3,130.214,rs13082230,0.053  
3,130.322,rs3772836,0.051  
3,130.449,rs9968182,0.060  
3,130.531,rs2877822,0.048  
3,130.538,rs12495301,0.048  
3,130.547,rs10934702,0.048  
3,130.559,rs7644047,0.048  
3,130.716,rs2981548,0.044  
3,130.743,rs4679258,0.032  
3,130.765,rs2333038,0.034  
3,130.816,rs2333034,0.029  
3,130.869,rs2922188,0.019  
3,130.914,rs9827398,0.023  
3,130.919,rs2735226,0.022  
3,130.969,rs4340655,0.019  
3,131.114,rs3936031,0.009  
3,131.185,rs6792028,0.004  
3,131.230,rs10934751,0.002  
3,131.234,rs16837171,0.002  
3,131.241,rs4646703,0.002  
3,131.399,rs2044577,-0.003  
3,131.402,rs731221,-0.003  
3,131.403,rs747037,-0.003  
3,131.409,rs4679115,-0.004  
3,131.422,rs7612364,-0.005  
3,131.445,rs9825812,-0.003  
3,131.549,rs1877966,-0.028  
3,131.553,rs9864977,-0.029  
3,131.570,rs2280677,-0.032  
3,131.600,rs6794488,-0.047  
3,131.621,rs13316625,-0.048  
3,131.626,rs13099144,-0.048  
3,131.713,rs1687482,-0.048  
3,132.306,rs9637365,-0.023  
3,132.384,rs1550991,-0.020  
3,132.536,rs6785036,-0.011  
3,132.592,rs1007390,-0.008  
3,132.705,rs9810372,0.000  
3,132.709,rs10934803,0.001  
3,132.752,rs6807545,0.001  
3,132.782,rs11710590,0.001  
3,132.790,rs6802930,0.000  
3,132.811,rs10934807,-0.001  
3,132.864,rs6414306,-0.000



3,132.906,rs9990353,0.000  
3,132.912,rs2358544,0.002  
3,132.977,rs1374924,0.016  
3,132.994,rs10804581,0.017  
3,133.007,rs1562531,0.018  
3,133.049,rs2594210,0.021  
3,133.153,rs782446,0.030  
3,133.163,rs782437,0.033  
3,133.208,rs7651814,0.041  
3,133.212,rs664910,0.041  
3,133.221,rs608318,0.043  
3,133.224,rs684358,0.039  
3,133.227,rs13066225,0.036  
3,133.237,rs9846048,0.034  
3,133.304,rs4974416,0.058  
3,133.338,rs7640916,0.074  
3,133.406,rs16839633,0.072  
3,133.415,rs13100951,0.072  
3,133.530,rs7650365,0.076  
3,133.827,rs2659703,0.103  
3,133.829,rs4857895,0.102  
3,133.838,rs13071640,0.087  
3,133.847,rs10934854,0.072  
3,133.851,rs2713594,0.069  
3,133.870,rs7629791,0.098  
3,133.880,rs2659695,0.096  
3,133.926,rs12495912,0.087  
3,133.937,rs2713575,0.084  
3,134.055,rs10934861,0.105  
3,135.106,rs6439154,0.188  
3,135.351,rs7636293,0.185  
3,135.459,rs4688850,0.260  
3,135.473,rs10934884,0.265  
3,135.481,rs2301570,0.269  
3,135.571,rs7610060,0.293  
3,135.576,rs2301572,0.290  
3,135.627,rs10934891,0.269  
3,135.898,rs2175730,0.163  
3,136.194,rs13080253,0.132  
3,136.350,rs2971565,0.132  
3,136.427,rs10934949,0.136  
3,136.495,rs7614116,0.139  
3,136.622,rs12493491,0.133  
3,136.973,rs7639065,0.118  
3,137.162,rs4854625,0.125  
3,137.235,rs9867458,0.129  
3,137.245,rs2251178,0.129  
3,137.305,rs7611808,0.150  
3,137.328,rs9822908,0.157  
3,137.329,rs16837371,0.158  
3,137.365,rs6762188,0.178  
3,137.417,rs10512824,0.179  
3,137.423,rs1913285,0.179  
3,137.532,rs883370,0.202  
3,137.548,rs1225047,0.206  
3,137.562,rs6785853,0.207  
3,137.626,rs2369364,0.219  
3,137.672,rs9289416,0.211  
3,137.714,rs3851997,0.214  
3,137.725,rs4083132,0.216  
3,137.758,rs1395006,0.220

3,137.916,rs6776932,0.296  
3,138.039,rs2133692,0.312  
3,138.160,rs6786305,0.277  
3,138.199,rs3860501,0.265  
3,138.203,rs6766736,0.264  
3,138.213,rs3860503,0.262  
3,138.334,rs9881437,0.221  
3,138.392,rs9813321,0.203  
3,138.404,rs6777507,0.196  
3,138.410,rs10512871,0.193  
3,138.469,rs7625328,0.159  
3,138.601,rs7631163,0.112  
3,138.620,rs3897016,0.108  
3,138.759,rs6439400,0.118  
3,138.778,rs11717365,0.111  
3,138.827,rs7652889,0.094  
3,138.846,rs9876777,0.097  
3,138.856,rs13095648,0.096  
3,138.861,rs13059279,0.106  
3,138.866,rs7647249,0.110  
3,138.873,rs12630919,0.102  
3,138.875,rs4854723,0.083  
3,139.030,rs2718812,0.110  
3,139.070,rs4287912,0.104  
3,139.098,rs8177313,0.102  
3,139.168,rs6439441,0.096  
3,139.193,rs1880666,0.109  
3,139.224,rs1113479,0.136  
3,139.274,rs2692687,0.139  
3,139.282,rs6439445,0.117  
3,139.334,rs9917636,0.098  
3,139.346,rs4241363,0.095  
3,139.369,rs4854785,0.092  
3,139.380,rs7625035,0.088  
3,139.388,rs9841380,0.070  
3,139.434,rs6765810,0.061  
3,139.449,rs4241367,0.062  
3,139.513,rs7630560,0.060  
3,139.534,rs13067800,0.060  
3,139.701,rs13080059,0.066  
3,139.762,rs1466827,0.075  
3,139.787,rs4974500,0.075  
3,139.821,rs4602357,0.060  
3,139.964,rs9821505,0.043  
3,140.108,rs11923418,0.029  
3,140.150,rs9289483,0.027  
3,140.564,rs4955502,0.012  
3,140.682,rs885594,0.019  
3,140.892,rs7651593,0.029  
3,141.034,rs9868348,0.031  
3,141.143,rs36221,0.035  
3,141.309,rs40437,0.044  
3,141.468,rs36132,0.048  
3,141.826,rs36057,0.039  
3,141.857,rs6791224,0.036  
3,141.948,rs11706256,0.026  
3,141.954,rs7626314,0.026  
3,141.993,rs3772643,0.016  
3,142.008,rs6801620,0.013  
3,142.071,rs7613488,0.004  
3,142.082,rs9865620,0.001

3,142.222,rs16842953,0.003  
3,142.250,rs824070,0.003  
3,142.407,rs9864846,0.010  
3,142.420,rs1502186,0.011  
3,142.457,rs10935172,0.010  
3,142.466,rs16843144,0.010  
3,142.476,rs6439579,0.010  
3,142.538,rs1447598,0.017  
3,142.546,rs3850168,0.018  
3,142.659,rs1447600,0.025  
3,142.661,rs7613386,0.025  
3,142.823,rs10512975,0.027  
3,142.862,rs7622329,0.027  
3,142.919,rs11718972,0.026  
3,143.915,rs835634,0.024  
3,144.000,rs752923,0.028  
3,144.030,rs6788460,0.030  
3,144.031,rs7626849,0.032  
3,144.032,rs1478312,0.034  
3,144.033,rs1542535,0.035  
3,144.036,rs12630965,0.030  
3,144.037,rs1899450,0.028  
3,144.038,rs10935266,0.028  
3,144.103,rs6766201,0.022  
3,144.110,rs329129,0.022  
3,144.148,rs7631734,0.028  
3,144.209,rs12631438,0.023  
3,144.243,rs1672927,0.017  
3,144.274,rs641320,0.011  
3,144.391,rs9809852,0.000  
3,144.452,rs6775443,0.000  
3,144.454,rs7626828,0.000  
3,144.503,rs6439841,-0.000  
3,144.529,rs10935317,0.000  
3,144.533,rs4894345,0.001  
3,144.605,rs12495890,0.002  
3,144.723,rs7625738,0.010  
3,144.732,rs16849307,0.004  
3,144.766,rs13072543,0.002  
3,144.790,rs1900627,0.004  
3,144.794,rs2028994,0.005  
3,144.800,rs6777158,0.005  
3,144.858,rs17336463,0.005  
3,144.866,rs4613415,0.005  
3,144.916,rs986561,0.004  
3,144.928,rs4683468,0.004  
3,144.966,rs7652623,0.002  
3,144.976,rs2882429,0.000  
3,144.981,rs4683806,0.001  
3,144.987,rs1320260,0.000  
3,144.990,rs4638924,0.000  
3,145.006,rs9289600,0.000  
3,145.041,rs1878982,0.000  
3,145.042,rs9816454,0.000  
3,145.088,rs4142786,0.000  
3,145.100,rs16850177,0.000  
3,145.116,rs11915085,0.000  
3,145.119,rs7618673,0.000  
3,145.122,rs17411949,0.000  
3,145.144,rs13073891,0.001  
3,145.166,rs17348572,0.002

3,145.171,rs524554,0.002  
3,145.212,rs10513121,0.011  
3,145.214,rs16850488,0.011  
3,145.286,rs7651388,0.022  
3,145.308,rs7627814,0.023  
3,145.339,rs7632490,0.019  
3,145.398,rs6808549,0.014  
3,145.696,rs16851055,0.040  
3,145.784,rs2291042,0.056  
3,145.785,rs875870,0.056  
3,145.929,rs16851254,0.113  
3,145.935,rs1026716,0.116  
3,145.984,rs4683401,0.142  
3,145.986,rs9809435,0.146  
3,146.016,rs4683600,0.205  
3,146.020,rs1983234,0.208  
3,146.079,rs10513136,0.219  
3,146.098,rs6762826,0.221  
3,146.105,rs7612543,0.221  
3,146.195,rs295302,0.250  
3,146.199,rs2131495,0.248  
3,146.209,rs7618625,0.246  
3,146.217,rs2030184,0.241  
3,146.231,rs4683620,0.251  
3,146.239,rs16851667,0.276  
3,146.240,rs9842908,0.276  
3,146.268,rs2677421,0.275  
3,146.307,rs4683630,0.322  
3,146.308,rs12107859,0.320  
3,146.324,rs1560413,0.285  
3,146.419,rs1705619,0.297  
3,146.443,rs6789998,0.292  
3,146.475,rs6764361,0.278  
3,146.711,rs4256152,0.249  
3,147.820,rs936198,0.229  
3,147.858,rs6440136,0.225  
3,147.875,rs6805378,0.210  
3,147.901,rs17572584,0.197  
3,147.903,rs10935483,0.196  
3,147.940,rs4839620,0.186  
3,147.949,rs12635345,0.183  
3,147.985,rs4839604,0.181  
3,147.987,rs961413,0.177  
3,148.012,rs9810857,0.141  
3,148.014,rs1046706,0.140  
3,148.022,rs7641350,0.139  
3,148.052,rs986376,0.128  
3,148.101,rs6769555,0.108  
3,148.207,rs6793522,0.112  
3,148.213,rs905142,0.113  
3,148.223,rs4839595,0.115  
3,148.266,rs10513205,0.109  
3,148.310,rs2049504,0.108  
3,148.311,rs9872790,0.108  
3,148.316,rs1837611,0.111  
3,148.395,rs16853885,0.130  
3,148.419,rs6779888,0.136  
3,148.447,rs13061355,0.127  
3,148.454,rs12635131,0.125  
3,148.497,rs7644727,0.109  
3,148.501,rs10935500,0.108

3,148.522,rs12489656,0.103  
3,148.533,rs4839655,0.094  
3,148.549,rs11712783,0.089  
3,148.556,rs9829503,0.089  
3,148.562,rs7616384,0.091  
3,148.586,rs11714850,0.099  
3,148.604,rs5025389,0.087  
3,148.630,rs2007192,0.094  
3,148.755,rs6440204,0.093  
3,148.871,rs10935504,0.077  
3,149.035,rs6784938,0.053  
3,149.096,rs9862907,0.052  
3,149.321,rs6770845,0.055  
3,149.425,rs10490849,0.053  
3,149.556,rs2717399,0.051  
3,149.667,rs1182797,0.046  
3,149.730,rs16855649,0.049  
3,150.047,rs7615606,0.061  
3,150.187,rs4401402,0.075  
3,150.227,rs953859,0.075  
3,150.296,rs10454765,0.075  
3,150.392,rs9883600,0.076  
3,150.706,rs1348657,0.091  
3,150.749,rs1822907,0.089  
3,150.923,rs1320914,0.097  
3,151.293,rs1881036,0.088  
3,151.389,rs9878320,0.089  
3,151.402,rs9868350,0.074  
3,151.488,rs9869039,0.079  
3,151.578,rs7612202,0.094  
3,151.647,rs9866001,0.115  
3,151.668,rs9831692,0.141  
3,151.685,rs7630694,0.145  
3,151.741,rs6440401,0.156  
3,151.816,rs9844407,0.148  
3,151.831,rs16857836,0.138  
3,151.841,rs9867807,0.131  
3,151.891,rs4681298,0.133  
3,151.914,rs1913185,0.134  
3,151.928,rs1828652,0.118  
3,151.931,rs3920230,0.101  
3,152.033,rs7650361,0.104  
3,152.064,rs6806643,0.100  
3,152.099,rs2688692,0.093  
3,152.108,rs1061307,0.094  
3,152.125,rs343292,0.096  
3,152.141,rs9822212,0.096  
3,152.147,rs163731,0.095  
3,152.229,rs1019897,0.086  
3,152.283,rs1464446,0.088  
3,152.295,rs6440468,0.089  
3,152.310,rs11721056,0.075  
3,152.349,rs9814423,0.079  
3,152.642,rs16846545,0.090  
3,152.703,rs1503733,0.092  
3,152.715,rs1532769,0.073  
3,152.902,rs4596113,0.089  
3,152.924,rs13063052,0.095  
3,152.938,rs9862216,0.105  
3,152.942,rs2319333,0.108  
3,152.954,rs2873943,0.126

3,152.970,rs9864940,0.114  
3,152.974,rs6777677,0.111  
3,152.997,rs11928247,0.092  
3,153.003,rs1391796,0.085  
3,153.007,rs1909357,0.087  
3,153.018,rs11922072,0.086  
3,153.064,rs6775904,0.082  
3,153.074,rs7613691,0.075  
3,153.087,rs11708371,0.073  
3,153.088,rs1462654,0.074  
3,153.103,rs9847786,0.079  
3,153.107,rs16860010,0.079  
3,153.120,rs734873,0.077  
3,153.132,rs9848851,0.060  
3,153.146,rs15606,0.065  
3,153.153,rs7635506,0.061  
3,153.277,rs7610876,0.034  
3,153.292,rs1916224,0.032  
3,153.318,rs188019,0.013  
3,153.319,rs182146,0.013  
3,153.322,rs1873901,0.013  
3,153.333,rs2131127,0.010  
3,153.338,rs12695902,0.008  
3,153.341,rs427832,0.007  
3,153.343,rs6772419,0.005  
3,153.354,rs4681158,-0.000  
3,153.356,rs1318579,-0.000  
3,153.360,rs3772589,-0.000  
3,153.399,rs4681161,-0.004  
3,153.425,rs7623208,-0.006  
3,153.431,rs9289775,-0.006  
3,153.445,rs9653951,-0.006  
3,153.450,rs4450762,-0.006  
3,153.479,rs10513344,-0.007  
3,153.740,rs4974389,-0.022  
3,153.743,rs6799507,-0.022  
3,153.785,rs7623663,-0.028  
3,153.791,rs16861645,-0.029  
3,153.826,rs7617219,-0.034  
3,153.838,rs7613093,-0.039  
3,153.852,rs6788873,-0.056  
3,153.863,rs6787602,-0.057  
3,153.874,rs1526787,-0.059  
3,153.890,rs9831865,-0.059  
3,153.902,rs17787898,-0.059  
3,153.919,rs4681495,-0.057  
3,154.016,rs9869237,-0.060  
3,154.092,rs9289788,-0.091  
3,154.142,rs4681524,-0.106  
3,154.172,rs6766575,-0.109  
3,154.183,rs4681526,-0.110  
3,154.211,rs7652697,-0.110  
3,154.273,rs12632837,-0.110  
3,154.344,rs17787978,-0.112  
3,154.752,rs1002896,-0.130  
3,154.853,rs954715,-0.132  
3,155.077,rs3772200,-0.137  
3,155.353,rs16862294,-0.142  
3,155.453,rs3911489,-0.145  
3,155.646,rs4681564,-0.154  
3,155.651,rs1979425,-0.154

3,155.703,rs4484141,-0.153  
3,155.760,rs9857853,-0.127  
3,155.833,rs2903684,-0.129  
3,155.846,rs6784675,-0.127  
3,155.939,rs12638737,-0.112  
3,155.988,rs6790152,-0.093  
3,155.998,rs9813089,-0.089  
3,156.080,rs9838013,-0.085  
3,156.120,rs1463230,-0.079  
3,156.390,rs4681620,-0.073  
3,156.497,rs4234379,-0.072  
3,156.608,rs9883613,-0.066  
3,156.724,rs6440688,-0.050  
3,156.791,rs6440691,-0.045  
3,156.859,rs6766256,-0.032  
3,157.056,rs1220472,-0.027  
3,157.589,rs574445,-0.003  
3,157.600,rs4680029,-0.004  
3,157.611,rs3732753,-0.001  
3,157.624,rs2061201,-0.001  
3,157.643,rs12635944,-0.000  
3,157.651,rs13092829,-0.001  
3,157.665,rs9825721,-0.003  
3,157.682,rs16863118,-0.005  
3,157.691,rs7652387,-0.003  
3,157.693,rs1014691,-0.002  
3,157.697,rs6763580,-0.002  
3,157.743,rs358953,-0.006  
3,157.795,rs970235,-0.006  
3,157.819,rs12636173,-0.008  
3,157.861,rs1431494,-0.010  
3,157.907,rs2870518,-0.014  
3,157.947,rs7653603,-0.009  
3,158.077,rs3821665,-0.006  
3,158.079,rs11714493,-0.006  
3,158.195,rs7631760,-0.017  
3,158.241,rs6783939,-0.024  
3,158.258,rs16863517,-0.027  
3,158.266,rs1915717,-0.038  
3,158.341,rs991866,-0.041  
3,158.375,rs1401961,-0.045  
3,158.459,rs6440788,-0.054  
3,158.486,rs9823831,-0.044  
3,158.529,rs12489140,-0.045  
3,158.786,rs2898579,-0.050  
3,158.844,rs842497,-0.049  
3,159.301,rs323623,-0.031  
3,159.630,rs13079208,-0.018  
3,159.807,rs1434794,-0.017  
3,160.113,rs1350794,-0.015  
3,160.244,rs701265,-0.014  
3,160.335,rs12632803,-0.016  
3,160.424,rs1533913,-0.014  
3,160.460,rs9814144,-0.020  
3,160.463,rs701248,-0.029  
3,160.543,rs16822433,-0.042  
3,160.544,rs6440853,-0.042  
3,160.579,rs7355869,-0.044  
3,160.600,rs12629639,-0.040  
3,160.607,rs6764891,-0.030  
3,160.612,rs2221582,-0.033

3,160.622,rs6778259,-0.035  
3,160.653,rs6794116,-0.042  
3,160.688,rs11920638,-0.055  
3,160.705,rs3732619,-0.060  
3,160.731,rs958322,-0.068  
3,160.747,rs1388008,-0.063  
3,160.764,rs11920558,-0.072  
3,160.821,rs6806502,-0.077  
3,160.828,rs13321012,-0.078  
3,160.934,rs16822993,-0.082  
3,161.044,rs10935945,-0.087  
3,161.151,rs1032844,-0.099  
3,161.247,rs482953,-0.114  
3,161.430,rs1524538,-0.152  
3,161.816,rs386893,-0.182  
3,161.937,rs2689326,-0.187  
3,161.947,rs2136837,-0.190  
3,162.035,rs7629954,-0.185  
3,162.042,rs11915244,-0.186  
3,162.173,rs7629959,-0.191  
3,162.265,rs6440961,-0.242  
3,162.328,rs1525865,-0.280  
3,162.353,rs7623854,-0.234  
3,162.378,rs7643334,-0.232  
3,162.408,rs989692,-0.245  
3,162.418,rs968628,-0.209  
3,162.426,rs1025192,-0.205  
3,162.473,rs701109,-0.196  
3,162.561,rs6803323,-0.265  
3,162.571,rs6440972,-0.275  
3,162.588,rs6440975,-0.281  
3,162.595,rs4600855,-0.260  
3,162.685,rs7637342,-0.277  
3,162.727,rs359571,-0.300  
3,162.817,rs13067477,-0.349  
3,162.825,rs819849,-0.354  
3,162.832,rs10936023,-0.357  
3,162.964,rs4680239,-0.395  
3,163.061,rs13082914,-0.361  
3,163.087,rs1874952,-0.467  
3,163.195,rs1357432,-0.428  
3,163.199,rs11917301,-0.432  
3,163.236,rs7644005,-0.511  
3,163.262,rs17239426,-0.532  
3,163.272,rs4680277,-0.540  
3,163.468,rs10513495,-0.598  
3,163.667,rs10936043,-0.672  
3,163.738,rs9990369,-0.702  
3,163.756,rs16827204,-0.706  
3,163.937,rs4680353,-0.720  
3,164.383,rs939114,-0.687  
3,164.673,rs391398,-0.729  
3,164.686,rs340241,-0.717  
3,164.694,rs992089,-0.693  
3,164.708,rs9863735,-0.648  
3,164.711,rs7610202,-0.644  
3,164.712,rs12494264,-0.643  
3,164.728,rs10513534,-0.654  
3,164.756,rs1962071,-0.636  
3,164.824,rs16830368,-0.635  
3,164.845,rs9870894,-0.597



3,164.848,rs1387696,-0.611  
3,164.854,rs11710258,-0.635  
3,164.862,rs12108170,-0.629  
3,164.904,rs4602438,-0.596  
3,164.910,rs719070,-0.588  
3,164.934,rs7640429,-0.560  
3,164.946,rs6785153,-0.551  
3,164.959,rs550662,-0.543  
3,164.974,rs6441284,-0.519  
3,164.980,rs2647926,-0.516  
3,165.003,rs1498737,-0.516  
3,165.042,rs16831149,-0.502  
3,165.125,rs4680588,-0.498  
3,165.190,rs7641978,-0.524  
3,165.194,rs17505069,-0.526  
3,165.288,rs4390979,-0.557  
3,165.934,rs13083229,-0.783  
3,166.143,rs16832858,-0.855  
3,166.144,rs6441392,-0.855  
3,166.208,rs1515730,-0.874  
3,166.222,rs1436740,-0.876  
3,166.228,rs10936248,-0.877  
3,166.239,rs1115517,-0.858  
3,166.248,rs16833700,-0.841  
3,166.252,rs4093549,-0.834  
3,166.278,rs9838303,-0.886  
3,166.279,rs6778276,-0.889  
3,166.301,rs4425278,-0.933  
3,166.342,rs6804961,-0.912  
3,166.349,rs7609974,-0.908  
3,166.378,rs12496424,-0.909  
3,166.379,rs6798308,-0.909  
3,166.387,rs9823100,-0.907  
3,166.395,rs7340714,-0.904  
3,166.448,rs11917604,-0.887  
3,166.453,rs6441449,-0.891  
3,166.503,rs13083177,-0.931  
3,166.513,rs6804879,-0.939  
3,166.596,rs16855005,-0.943  
3,166.601,rs9860284,-0.943  
3,166.667,rs843057,-0.905  
3,166.728,rs9283631,-0.868  
3,166.762,rs4855274,-0.847  
3,166.770,rs7622802,-0.844  
3,166.785,rs9825896,-0.830  
3,166.971,rs13098760,-0.633  
3,167.018,rs9849665,-0.606  
3,167.198,rs4557160,-0.543  
3,167.209,rs9283633,-0.538  
3,167.243,rs11928265,-0.504  
3,167.270,rs1525383,-0.485  
3,167.304,rs10513615,-0.462  
3,167.319,rs4452350,-0.440  
3,167.343,rs7432504,-0.405  
3,167.434,rs1438578,-0.400  
3,167.452,rs2872065,-0.399  
3,167.457,rs7632669,-0.398  
3,167.574,rs6801797,-0.362  
3,167.683,rs7648668,-0.328  
3,167.734,rs13062144,-0.293  
3,167.756,rs1916286,-0.287

3,167.819,rs1356768,-0.269  
3,167.888,rs7648776,-0.235  
3,167.930,rs10451920,-0.215  
3,167.947,rs9878131,-0.210  
3,167.959,rs1464634,-0.207  
3,167.969,rs9869341,-0.205  
3,168.026,rs6788437,-0.207  
3,168.105,rs11921535,-0.213  
3,168.179,rs6763376,-0.260  
3,168.201,rs972730,-0.263  
3,168.228,rs7631039,-0.276  
3,168.262,rs7639014,-0.294  
3,168.298,rs4345115,-0.247  
3,168.327,rs6807050,-0.231  
3,168.333,rs6444798,-0.224  
3,168.334,rs6767716,-0.223  
3,168.485,rs865772,-0.182  
3,168.501,rs884828,-0.183  
3,168.512,rs2053021,-0.183  
3,168.518,rs13091735,-0.183  
3,168.520,rs3911093,-0.183  
3,168.744,rs9809990,-0.341  
3,168.823,rs3863100,-0.326  
3,168.903,rs10513664,-0.305  
3,168.911,rs6444848,-0.303  
3,168.913,rs4955642,-0.334  
3,168.930,rs9290362,-0.324  
3,168.941,rs3851384,-0.317  
3,169.057,rs1430435,-0.254  
3,169.116,rs9814713,-0.239  
3,169.147,rs13318214,-0.229  
3,169.151,rs10513667,-0.254  
3,169.198,rs4245909,-0.235  
3,169.212,rs12632583,-0.223  
3,169.214,rs17559919,-0.221  
3,169.236,rs7652987,-0.192  
3,169.257,rs7638569,-0.192  
3,169.329,rs16854053,-0.201  
3,169.351,rs721808,-0.205  
3,169.435,rs7626686,-0.221  
3,169.456,rs933605,-0.224  
3,169.489,rs2421748,-0.224  
3,169.814,rs7647589,-0.222  
3,169.836,rs7628292,-0.235  
3,169.867,rs16854522,-0.253  
3,169.907,rs1290670,-0.265  
3,170.067,rs10936619,-0.327  
3,170.077,rs546950,-0.331  
3,170.185,rs9875109,-0.375  
3,170.275,rs6789670,-0.366  
3,170.280,rs7647823,-0.365  
3,170.309,rs3732448,-0.351  
3,170.347,rs11924505,-0.341  
3,170.351,rs9880460,-0.340  
3,170.446,rs6787400,-0.308  
3,170.518,rs479645,-0.304  
3,170.589,rs12485248,-0.308  
3,170.624,rs4955756,-0.248  
3,170.665,rs6792607,-0.247  
3,170.810,rs16855718,-0.270  
3,170.844,rs16855813,-0.272

3,170.850,rs9789980,-0.272  
3,170.894,rs6444967,-0.276  
3,170.935,rs11716192,-0.270  
3,170.947,rs1124184,-0.269  
3,170.973,rs9819421,-0.246  
3,170.993,rs2035913,-0.223  
3,171.047,rs9824791,-0.206  
3,171.065,rs902952,-0.193  
3,171.067,rs4894425,-0.196  
3,171.071,rs9811628,-0.211  
3,171.073,rs882172,-0.217  
3,171.078,rs9290412,-0.215  
3,171.096,rs10936685,-0.214  
3,171.112,rs721912,-0.204  
3,171.134,rs10936689,-0.234  
3,171.166,rs6445008,-0.247  
3,171.186,rs2160992,-0.257  
3,171.213,rs83616,-0.260  
3,171.238,rs7634685,-0.292  
3,171.353,rs13092828,-0.307  
3,171.362,rs7652788,-0.311  
3,171.363,rs9830035,-0.311  
3,171.398,rs3850193,-0.265  
3,171.459,rs472728,-0.197  
3,171.488,rs559235,-0.192  
3,171.570,rs4894803,-0.198  
3,171.654,rs6763884,-0.202  
3,171.696,rs9825202,-0.204  
3,171.747,rs4894819,-0.206  
3,171.883,rs13094089,-0.217  
3,171.923,rs4894535,-0.221  
3,171.936,rs9838734,-0.228  
3,171.987,rs6773689,-0.249  
3,172.014,rs7642511,-0.248  
3,172.019,rs2172839,-0.248  
3,172.089,rs660239,-0.232  
3,172.096,rs4894544,-0.227  
3,172.127,rs9810131,-0.197  
3,172.152,rs519352,-0.173  
3,172.238,rs9819506,-0.206  
3,172.320,rs2041693,-0.192  
3,172.358,rs231983,-0.188  
3,172.378,rs11925997,-0.184  
3,172.419,rs3843973,-0.173  
3,172.425,rs231998,-0.173  
3,172.476,rs11918360,-0.135  
3,172.512,rs9872004,-0.130  
3,172.546,rs234025,-0.126  
3,172.597,rs6778941,-0.143  
3,172.603,rs17756228,-0.148  
3,172.645,rs497316,-0.124  
3,172.649,rs483772,-0.126  
3,172.662,rs494694,-0.130  
3,172.892,rs11919648,-0.148  
3,172.951,rs7433573,-0.153  
3,172.972,rs13066810,-0.156  
3,173.148,rs9864296,-0.169  
3,173.170,rs9876188,-0.166  
3,173.246,rs791832,-0.155  
3,173.341,rs7620311,-0.123  
3,173.481,rs10460879,-0.098

3,173.690,rs792128,-0.094  
3,173.713,rs9290468,-0.087  
3,173.756,rs9840933,-0.076  
3,173.771,rs705041,-0.081  
3,173.786,rs1392120,-0.089  
3,173.832,rs1402216,-0.080  
3,173.973,rs532021,-0.057  
3,173.976,rs605211,-0.056  
3,174.390,rs247968,-0.048  
3,174.475,rs3774047,-0.051  
3,174.513,rs17178976,-0.054  
3,174.631,rs9868927,-0.063  
3,174.650,rs6801163,-0.065  
3,174.847,rs9827076,-0.074  
3,174.964,rs959148,-0.076  
3,175.153,rs1387004,-0.074  
3,175.877,rs13097226,-0.062  
3,176.073,rs6792822,-0.056  
3,176.133,rs6789981,-0.054  
3,176.195,rs291928,-0.053  
3,176.753,rs11919911,-0.038  
3,177.152,rs1421425,-0.032  
3,177.289,rs811197,-0.031  
3,177.343,rs7610632,-0.020  
3,177.345,rs7620258,-0.020  
3,177.395,rs9830993,-0.020  
3,177.469,rs9290503,-0.022  
3,177.500,rs13084517,-0.021  
3,177.524,rs10936812,-0.018  
3,177.565,rs552008,-0.014  
3,177.619,rs538340,-0.016  
3,177.645,rs6445183,-0.016  
3,177.678,rs6767604,-0.014  
3,177.746,rs10513729,-0.016  
3,177.820,rs9880874,-0.015  
3,177.826,rs4452337,-0.014  
3,177.828,rs9823658,-0.013  
3,177.882,rs1461272,-0.048  
3,177.899,rs9849745,-0.050  
3,177.965,rs12633712,-0.046  
3,178.021,rs6443300,-0.037  
3,178.086,rs9879950,-0.026  
3,178.119,rs6799976,-0.024  
3,178.257,rs4894713,-0.016  
3,178.277,rs2161044,-0.015  
3,178.285,rs9821455,-0.018  
3,178.286,rs10490874,-0.018  
3,178.291,rs7629234,-0.016  
3,178.306,rs16825529,-0.025  
3,178.371,rs7643142,-0.036  
3,178.382,rs6774177,-0.037  
3,178.420,rs9815671,-0.028  
3,178.544,rs6443305,-0.020  
3,178.555,rs7628569,-0.020  
3,178.583,rs10513733,-0.018  
3,178.976,rs1931156,-0.006  
3,178.990,rs1931164,-0.006  
3,179.011,rs2184207,-0.009  
3,179.018,rs2184212,-0.006  
3,179.042,rs4386512,-0.006  
3,179.244,rs9815577,-0.005

3,179.247,rs9884045,-0.005  
3,179.265,rs9823496,-0.005  
3,179.266,rs9824424,-0.005  
3,179.284,rs9859162,-0.005  
3,179.349,rs1320287,-0.007  
3,179.457,rs7653056,-0.011  
3,179.680,rs1921476,-0.020  
3,179.828,rs5008411,-0.017  
3,180.030,rs6778967,-0.011  
3,180.172,rs9878774,-0.012  
3,180.209,rs1377820,-0.011  
3,180.239,rs9917710,-0.010  
3,180.261,rs2862481,-0.010  
3,180.297,rs7641922,-0.009  
3,180.355,rs838209,-0.007  
3,180.403,rs9815008,-0.009  
3,180.457,rs1490070,-0.011  
3,180.544,rs1490054,-0.011  
3,180.557,rs6778657,-0.006  
3,180.638,rs1906658,-0.007  
3,180.696,rs2902280,-0.005  
3,180.735,rs13097413,-0.004  
3,180.764,rs4274761,-0.002  
3,180.765,rs6784900,-0.002  
3,180.795,rs6443423,-0.000  
3,180.900,rs1681655,-0.001  
3,180.936,rs1201296,-0.001  
3,181.039,rs3923106,-0.002  
3,181.158,rs9840651,-0.002  
3,181.165,rs6443448,-0.002  
3,181.184,rs12629106,-0.006  
3,181.202,rs7374825,-0.011  
3,181.212,rs6766374,-0.011  
3,181.238,rs1995243,-0.009  
3,181.261,rs7632844,-0.005  
3,181.280,rs17631673,-0.015  
3,181.323,rs1499880,-0.015  
3,181.344,rs10470510,-0.015  
3,181.420,rs2133600,-0.022  
3,181.481,rs10513748,-0.032  
3,181.559,rs1369569,-0.059  
3,181.588,rs9861373,-0.098  
3,181.611,rs1561030,-0.092  
3,181.762,rs9817294,-0.063  
3,181.812,rs7634528,-0.075  
3,181.862,rs16829067,-0.088  
3,181.895,rs9828139,-0.094  
3,182.169,rs9854383,-0.135  
3,182.405,rs282880,-0.113  
3,182.433,rs9290646,-0.131  
3,182.744,rs9847335,-0.160  
3,182.768,rs9856750,-0.161  
3,182.920,rs9839376,-0.164  
3,182.982,rs12634309,-0.164  
3,183.062,rs6809208,-0.158  
3,183.670,rs7645550,-0.138  
3,183.687,rs6443636,-0.133  
3,183.711,rs6805876,-0.127  
3,183.758,rs2287208,-0.133  
3,183.771,rs7622921,-0.145  
3,183.778,rs6807740,-0.151

3,183.788,rs2339802,-0.161  
3,183.796,rs10513760,-0.143  
3,183.800,rs2077675,-0.144  
3,183.830,rs2339844,-0.155  
3,183.855,rs9874079,-0.164  
3,183.873,rs4854948,-0.174  
3,183.898,rs2287240,-0.198  
3,183.922,rs4855113,-0.201  
3,183.986,rs7623941,-0.217  
3,183.991,rs4855129,-0.206  
3,184.022,rs9828621,-0.204  
3,184.036,rs1568554,-0.207  
3,184.298,rs9823620,-0.257  
3,184.482,rs869889,-0.294  
3,184.662,rs6443721,-0.329  
3,184.664,rs16832027,-0.331  
3,184.701,rs13067678,-0.361  
3,184.705,rs9838828,-0.360  
3,184.744,rs9847533,-0.348  
3,184.930,rs12635178,-0.288  
3,184.977,rs7610679,-0.292  
3,185.001,rs11923857,-0.298  
3,185.013,rs7618962,-0.297  
3,185.027,rs6800987,-0.317  
3,185.061,rs11922688,-0.304  
3,185.094,rs13096015,-0.248  
3,185.176,rs4855069,-0.233  
3,185.231,rs1435959,-0.235  
3,185.311,rs6443778,-0.221  
3,185.450,rs9836621,-0.195  
3,185.536,rs9880110,-0.158  
3,185.556,rs13079695,-0.133  
3,185.593,rs9813493,-0.122  
3,185.618,rs3843881,-0.138  
3,185.645,rs9817590,-0.147  
3,185.671,rs2717302,-0.155  
3,185.761,rs10937101,-0.186  
3,185.986,rs4859156,-0.241  
3,186.053,rs472795,-0.249  
3,186.058,rs684174,-0.249  
3,186.082,rs4859159,-0.254  
3,186.139,rs7634425,-0.265  
3,186.142,rs1496802,-0.264  
3,186.179,rs7620788,-0.208  
3,186.191,rs11719987,-0.197  
3,186.195,rs10937128,-0.193  
3,186.197,rs4859178,-0.191  
3,186.230,rs4859188,-0.222  
3,186.268,rs11919592,-0.226  
3,186.275,rs1879784,-0.224  
3,186.277,rs16857664,-0.225  
3,186.309,rs2056324,-0.244  
3,186.331,rs4066034,-0.233  
3,186.337,rs4859121,-0.259  
3,186.348,rs9824873,-0.264  
3,186.411,rs9825921,-0.284  
3,186.416,rs17621407,-0.286  
3,186.554,rs6809370,-0.327  
3,186.634,rs562,-0.319  
3,186.883,rs12493550,-0.300  
3,186.931,rs6766410,-0.302

3,187.079,rs6806377,-0.293  
3,187.174,rs2175525,-0.309  
3,187.203,rs843367,-0.338  
3,187.411,rs3752904,-0.289  
3,187.504,rs4912537,-0.272  
3,187.608,rs4912486,-0.241  
3,187.620,rs10513797,-0.238  
3,187.757,rs7429010,-0.202  
3,187.762,rs6806701,-0.201  
3,187.814,rs9844738,-0.181  
3,187.828,rs6777648,-0.172  
3,187.879,rs13096649,-0.157  
3,187.888,rs3930233,-0.155  
3,187.900,rs7433081,-0.153  
3,187.992,rs11720282,-0.164  
3,188.097,rs4582031,-0.183  
3,188.120,rs10937179,-0.184  
3,188.131,rs9849690,-0.187  
3,188.250,rs9846698,-0.203  
3,188.346,rs10937186,-0.183  
3,188.369,rs4687478,-0.185  
3,188.386,rs9844571,-0.178  
3,188.418,rs16859163,-0.188  
3,188.429,rs6766579,-0.184  
3,188.437,rs6786156,-0.184  
3,188.473,rs2377102,-0.176  
3,188.480,rs10513798,-0.174  
3,188.485,rs12152460,-0.173  
3,188.503,rs4686407,-0.169  
3,188.510,rs17220361,-0.169  
3,189.073,rs6765837,-0.186  
3,189.277,rs11714089,-0.172  
3,189.361,rs3774051,-0.155  
3,189.554,rs9866735,-0.110  
3,189.589,rs6444068,-0.105  
3,189.647,rs9832000,-0.106  
3,189.678,rs13091808,-0.115  
3,189.719,rs9790230,-0.127  
3,189.773,rs17826752,-0.133  
3,189.861,rs7638853,-0.138  
3,190.055,rs7619232,-0.161  
3,190.078,rs1470579,-0.164  
3,190.119,rs4634163,-0.189  
3,190.123,rs6776536,-0.253  
3,190.155,rs741604,-0.212  
3,190.232,rs2251407,-0.215  
3,190.244,rs4686400,-0.216  
3,190.258,rs6444089,-0.209  
3,190.280,rs13065531,-0.207  
3,190.292,rs6768604,-0.207  
3,190.510,rs7433760,-0.206  
3,190.693,rs11924144,-0.193  
3,190.706,rs4686734,-0.191  
3,190.891,rs9815931,-0.175  
3,190.897,rs1400360,-0.177  
3,190.933,rs12492576,-0.249  
3,190.937,rs2284838,-0.241  
3,190.944,rs4686753,-0.224  
3,190.945,rs9968130,-0.221  
3,190.970,rs2268833,-0.222  
3,190.974,rs1014695,-0.226

3,190.983,rs1541614,-0.226  
3,190.993,rs3819863,-0.208  
3,191.000,rs9870928,-0.193  
3,191.011,rs2239624,-0.184  
3,191.016,rs2268817,-0.180  
3,191.037,rs1981783,-0.154  
3,191.064,rs7618021,-0.169  
3,191.072,rs9839753,-0.167  
3,191.074,rs7432284,-0.166  
3,191.081,rs9821408,-0.166  
3,191.092,rs12496426,-0.160  
3,191.150,rs6798365,-0.151  
3,191.163,rs7610178,-0.153  
3,191.165,rs4374519,-0.153  
3,191.192,rs1868143,-0.136  
3,191.196,rs6778486,-0.137  
3,191.264,rs8147,-0.176  
3,191.295,rs2070633,-0.167  
3,191.337,rs9824398,-0.173  
3,191.382,rs11918289,-0.177  
3,191.393,rs1656922,-0.183  
3,191.397,rs266723,-0.185  
3,191.412,rs6807774,-0.196  
3,191.460,rs843991,-0.244  
3,191.490,rs10937273,-0.222  
3,191.496,rs822387,-0.224  
3,191.510,rs3821799,-0.230  
3,191.537,rs2117986,-0.230  
3,191.588,rs2889789,-0.167  
3,191.596,rs3887925,-0.158  
3,191.598,rs10513809,-0.157  
3,191.619,rs6766574,-0.143  
3,191.623,rs3864108,-0.151  
3,191.638,rs6444192,-0.180  
3,191.652,rs3872722,-0.182  
3,191.667,rs4686838,-0.186  
3,191.679,rs6444196,-0.187  
3,191.690,rs16861549,-0.186  
3,191.705,rs12054151,-0.184  
3,191.718,rs4686849,-0.180  
3,191.740,rs10490807,-0.168  
3,191.747,rs270161,-0.163  
3,191.754,rs6798581,-0.162  
3,191.855,rs6444210,-0.140  
3,191.861,rs11916885,-0.140  
3,191.913,rs1001073,-0.141  
3,191.927,rs874603,-0.137  
3,191.938,rs3815623,-0.135  
3,191.972,rs850309,-0.120  
3,192.011,rs698104,-0.125  
3,192.044,rs12492885,-0.128  
3,192.048,rs710475,-0.156  
3,192.128,rs751396,-0.162  
3,192.133,rs16861986,-0.160  
3,192.159,rs9028,-0.151  
3,192.178,rs2378246,-0.147  
3,192.276,rs7637064,-0.123  
3,192.313,rs16862163,-0.145  
3,192.360,rs6807004,-0.173  
3,192.382,rs11916826,-0.176  
3,192.426,rs2553991,-0.194



3,192.478,rs1452193,-0.203  
3,192.585,rs1452182,-0.208  
3,192.758,rs10513818,-0.181  
3,193.159,rs1005099,-0.119  
3,193.408,rs2378341,-0.106  
3,193.828,rs12107492,-0.092  
3,193.993,rs6444265,-0.088  
3,194.044,rs1157840,-0.087  
3,194.074,rs1903216,-0.086  
3,194.242,rs498688,-0.073  
3,194.255,rs6777331,-0.072  
3,194.410,rs4686917,-0.061  
3,194.635,rs6783007,-0.062  
3,194.688,rs2037184,-0.077  
3,194.705,rs9821867,-0.076  
3,194.747,rs6444269,-0.085  
3,194.877,rs9852144,-0.096  
3,194.930,rs4686935,-0.105  
3,195.022,rs1711001,-0.126  
3,195.028,rs1679195,-0.125  
3,195.073,rs344961,-0.116  
3,195.206,rs7645376,-0.090  
3,195.297,rs6777135,-0.062  
3,195.425,rs6784029,-0.040  
3,195.488,rs9830100,-0.037  
3,195.702,rs4686952,-0.031  
3,195.788,rs9817266,-0.028  
3,195.864,rs13076312,-0.027  
3,196.000,rs972338,-0.020  
3,196.008,rs6444286,-0.020  
3,196.116,rs9851525,-0.022  
3,196.200,rs12492561,-0.017  
3,196.233,rs3732913,-0.009  
3,196.335,rs2162261,-0.003  
3,196.438,rs16863396,-0.002  
3,196.505,rs2081550,-0.004  
3,196.669,rs2037121,-0.017  
3,196.688,rs1515424,-0.023  
3,196.719,rs4686980,-0.018  
3,196.818,rs1059380,-0.039  
3,196.819,rs3732909,-0.039  
3,197.036,rs12485376,-0.019  
3,197.098,rs11710948,-0.017  
3,197.130,rs7623253,-0.018  
3,197.227,rs17614714,-0.016  
3,197.304,rs925564,-0.016  
3,197.355,rs3732908,-0.011  
3,197.419,rs3817462,-0.006  
3,197.467,rs7623540,-0.005  
3,197.616,rs4686998,-0.018  
3,197.618,rs3901459,-0.018  
3,197.666,rs989455,-0.009  
3,197.690,rs3796283,-0.011  
3,197.720,rs4687002,-0.008  
3,197.800,rs6444341,-0.008  
3,197.970,rs3914986,-0.009  
3,198.040,rs2378469,-0.010  
3,198.132,rs4686507,-0.009  
3,198.220,rs9820421,-0.013  
3,198.232,rs6777676,-0.015  
3,198.365,rs6769057,-0.029

3,198.399,rs6784306,-0.031  
3,198.420,rs1055152,-0.011  
3,198.433,rs6793853,-0.006  
3,198.461,rs1399615,-0.008  
3,198.531,rs182009,-0.009  
3,198.602,rs7639459,-0.010  
3,198.857,rs6771859,-0.013  
3,198.897,rs3846206,-0.013  
3,199.366,rs10513838,-0.009  
3,199.604,rs3856776,-0.008  
3,199.615,rs6787246,-0.007  
3,199.685,rs6790258,-0.001  
3,199.773,rs7649341,-0.000  
3,199.852,rs4687090,-0.000  
3,199.877,rs6777607,-0.002  
3,199.914,rs9851375,-0.000  
3,199.943,rs9824061,-0.000  
3,199.949,rs9830137,0.000  
3,200.007,rs1464117,0.000  
3,200.036,rs1515495,0.000  
3,200.068,rs7619549,0.000  
3,200.123,rs9881595,0.001  
3,200.183,rs7619556,0.000  
3,200.226,rs9817981,0.003  
3,200.367,rs12107036,0.009  
3,200.474,rs7642848,0.015  
3,200.644,rs696066,0.014  
3,200.671,rs16864907,0.014  
3,200.922,rs967119,0.015  
3,201.169,rs710580,0.011  
3,201.224,rs16865070,0.010  
3,201.272,rs710595,0.010  
3,201.433,rs3098262,0.020  
3,201.460,rs536435,0.019  
3,201.734,rs9811462,0.018  
3,201.959,rs9878318,0.017  
3,202.014,rs10513846,0.006  
3,202.018,rs6809685,0.006  
3,202.026,rs3774023,0.007  
3,202.047,rs6781278,0.011  
3,202.331,rs9851374,0.015  
3,202.388,rs3943979,0.015  
3,202.469,rs9864293,0.024  
3,202.531,rs9290935,0.032  
3,202.588,rs2361832,0.022  
3,202.593,rs3773990,0.022  
3,202.602,rs3773989,0.021  
3,202.640,rs4687150,0.022  
3,202.672,rs10937439,0.021  
3,202.710,rs7628250,0.015  
3,202.750,rs4571225,0.016  
3,202.815,rs7626795,0.017  
3,203.062,rs7617445,0.050  
3,203.070,rs6775728,0.046  
3,203.090,rs9290953,0.036  
3,203.112,rs9682599,0.016  
3,203.113,rs7636699,0.015  
3,203.116,rs12634559,0.011  
3,203.125,rs9818981,0.013  
3,203.140,rs16865983,0.010  
3,203.178,rs1501602,0.007

3,203.292,rs2363970,-0.001  
3,203.303,rs13100749,-0.001  
3,203.410,rs9857505,-0.005  
3,203.446,rs7637404,-0.007  
3,203.515,rs150503,-0.007  
3,203.641,rs4677728,-0.001  
3,203.730,rs9290987,-0.000  
3,203.840,rs4234621,0.000  
3,203.848,rs12498025,-0.000  
3,203.850,rs2090721,-0.000  
3,203.868,rs12633186,0.000  
3,203.874,rs11922996,0.001  
3,203.944,rs1405037,0.001  
3,204.026,rs4686582,0.001  
3,204.177,rs9837138,0.000  
3,204.313,rs709113,0.002  
3,204.372,rs11711997,0.006  
3,204.382,rs11929015,0.006  
3,204.484,rs12635936,0.003  
3,204.547,rs6444592,0.002  
3,204.552,rs7621589,0.000  
3,204.604,rs7635839,0.000  
3,204.626,rs2669973,0.000  
3,204.697,rs2087698,-0.000  
3,204.726,rs1491520,-0.001  
3,204.768,rs6784780,-0.001  
3,204.868,rs2951798,-0.006  
3,204.957,rs6774732,-0.009  
3,204.996,rs10937534,-0.011  
3,205.054,rs975121,-0.012  
3,205.396,rs7641260,-0.011  
3,205.570,rs12487104,-0.022  
3,205.715,rs1525910,-0.037  
3,205.777,rs2686464,-0.029  
3,205.806,rs884309,-0.028  
3,205.906,rs12107377,-0.032  
3,205.974,rs6775137,-0.029  
3,206.272,rs9843820,-0.014  
3,206.475,rs1532684,-0.005  
3,206.502,rs781415,-0.004  
3,206.612,rs905566,-0.006  
3,206.685,rs2701588,-0.009  
3,206.816,rs1995472,-0.012  
3,206.897,rs1995574,-0.019  
3,206.997,rs1505440,-0.036  
3,207.043,rs2986,-0.047  
3,207.139,rs2367129,-0.079  
3,207.166,rs11716856,-0.083  
3,207.167,rs4455277,-0.083  
3,207.378,rs1157623,-0.083  
3,207.403,rs9855714,-0.081  
3,207.548,rs4686626,-0.074  
3,207.557,rs922331,-0.074  
3,207.756,rs10428211,-0.072  
3,207.857,rs2367477,-0.067  
3,207.952,rs4687402,-0.069  
3,208.016,rs951016,-0.070  
3,208.060,rs2280476,-0.071  
3,208.064,rs10439973,-0.071  
3,208.084,rs6763501,-0.072  
3,208.177,rs9879227,-0.078

3,208.312,rs9283663,-0.096  
3,208.577,rs7624750,-0.097  
3,208.784,rs280552,-0.098  
3,208.871,rs904879,-0.074  
3,208.889,rs6444746,-0.072  
3,208.947,rs533857,-0.067  
3,209.020,rs7629215,-0.038  
3,209.052,rs968861,-0.032  
3,209.114,rs13324043,-0.023  
3,209.169,rs4686653,-0.025  
3,209.205,rs1872542,-0.010  
3,209.215,rs11914434,-0.007  
3,209.256,rs9855415,-0.000  
3,209.269,rs6770661,-0.000  
3,209.273,rs1472075,-0.000  
3,209.293,rs7641641,-0.000  
3,209.322,rs1078814,-0.001  
3,209.388,rs1490752,-0.013  
3,209.507,rs6796696,-0.048  
3,209.516,rs6444771,-0.049  
3,209.582,rs2368046,-0.047  
3,209.603,rs7632519,-0.050  
3,209.622,rs4532075,-0.055  
3,209.660,rs9858096,-0.022  
3,209.684,rs4613405,-0.016  
3,209.696,rs7647261,-0.015  
3,209.749,rs6778204,-0.048  
3,209.753,rs9811548,-0.049  
3,209.783,rs10933727,-0.049  
3,209.840,rs11922293,-0.042  
3,209.858,rs6785704,-0.039  
3,209.865,rs11928683,-0.039  
3,209.937,rs12629557,-0.044  
3,209.949,rs3732477,-0.034  
3,209.987,rs6789870,-0.031  
3,209.998,rs923931,-0.028  
3,210.023,rs7642341,-0.022  
3,210.282,rs6437379,-0.023  
3,210.291,rs2153519,-0.024  
3,210.344,rs9862208,-0.024  
3,210.411,rs705298,-0.027  
3,210.446,rs938087,-0.027  
3,210.455,rs7620693,-0.040  
3,210.489,rs7621704,-0.051  
3,210.517,rs2898610,-0.054  
3,210.721,rs1077729,-0.080  
3,210.768,rs2126305,-0.084  
3,210.885,rs4677743,-0.102  
3,210.969,rs4488776,-0.077  
3,210.994,rs9860061,-0.081  
3,211.014,rs4677760,-0.074  
3,211.027,rs753628,-0.070  
3,211.071,rs11719165,-0.074  
3,211.089,rs10933683,-0.077  
3,211.220,rs878809,-0.074  
3,211.244,rs3892715,-0.050  
3,211.266,rs10804418,-0.050  
3,211.309,rs952481,-0.047  
3,211.387,rs11719455,-0.030  
3,211.394,rs3796160,-0.030  
3,211.646,rs7633265,-0.031

3,212.804,rs823504,-0.009  
3,214.972,rs2688515,-0.005  
3,215.263,rs6800709,-0.008  
3,215.311,rs6806773,-0.004  
3,215.322,rs9858622,-0.002  
3,215.336,rs9844652,-0.001  
3,215.352,rs2278034,-0.001  
3,215.677,rs3817672,-0.002  
3,215.719,rs9990333,-0.007  
3,215.735,rs13080736,-0.006  
3,215.752,rs4075688,-0.005  
3,215.762,rs7625441,-0.004  
3,215.787,rs6765113,-0.002  
3,215.789,rs4927884,-0.002  
3,215.880,rs11185516,-0.002  
3,215.881,rs9812036,-0.001  
3,216.245,rs7374260,-0.000  
3,216.260,rs12631706,-0.000  
3,216.281,rs7639524,-0.000  
3,216.476,rs11185546,0.004  
3,216.490,rs2014220,0.005  
3,216.500,rs9843585,0.013  
3,216.552,rs1385331,0.015  
3,216.580,rs843522,0.014  
3,216.590,rs6766451,0.017  
3,216.605,rs4912589,0.029  
3,216.619,rs1798628,0.040  
3,216.632,rs13098826,0.048  
3,216.680,rs2030534,0.053  
3,216.729,rs3844057,0.055  
3,216.798,rs9325377,0.055  
3,217.056,rs548853,0.076  
3,217.066,rs4916589,0.076  
3,217.123,rs4916596,0.081  
3,217.560,rs9843659,0.092  
3,217.673,rs7644221,0.085  
3,217.712,rs6777317,0.065  
3,217.721,rs768858,0.065  
3,217.729,rs1018527,0.066  
3,217.861,rs6772127,0.061  
3,217.891,rs4857595,0.061  
3,217.899,rs13099300,0.062  
3,217.941,rs2567346,0.060  
3,217.970,rs9813057,0.058  
3,218.080,rs1549830,0.052  
3,218.158,rs9841534,0.049  
3,218.195,rs4857506,0.051  
3,218.387,rs4508802,0.056  
3,218.497,rs3205525,0.059  
3,218.547,rs12107316,0.063  
3,218.625,rs11928427,0.069  
3,218.634,rs11717776,0.055  
3,218.957,rs13327370,0.066  
3,219.015,rs4030334,0.081  
3,219.023,rs12636087,0.081  
4,0.214,rs7665922,0.313  
4,0.385,rs6848983,0.373  
4,0.529,rs7695712,0.424  
4,0.688,rs1127410,0.448  
4,0.698,rs13149565,0.448  
4,0.950,rs4690296,0.387

4,0.969,rs17164972,0.376  
4,0.983,rs6810428,0.367  
4,1.027,rs7677766,0.352  
4,1.057,rs936551,0.348  
4,1.110,rs755447,0.343  
4,1.113,rs764324,0.342  
4,1.208,rs2290405,0.369  
4,1.285,rs748651,0.352  
4,1.295,rs4647932,0.354  
4,1.387,rs3796619,0.377  
4,1.428,rs7659054,0.374  
4,1.523,rs900030,0.347  
4,1.583,rs3755930,0.330  
4,1.635,rs11247980,0.315  
4,1.650,rs11727167,0.313  
4,1.758,rs10024529,0.321  
4,1.972,rs11947258,0.293  
4,2.002,rs6822351,0.288  
4,2.033,rs10050053,0.285  
4,2.098,rs6858080,0.262  
4,2.251,rs2854915,0.285  
4,2.356,rs743682,0.275  
4,2.450,rs4865483,0.254  
4,2.617,rs3135123,0.223  
4,2.628,rs550483,0.223  
4,2.972,rs7660498,0.241  
4,3.017,rs4974666,0.232  
4,3.053,rs17768393,0.231  
4,3.064,rs4974674,0.231  
4,3.104,rs3118617,0.203  
4,3.173,rs3135093,0.178  
4,3.237,rs1203764,0.136  
4,3.331,rs1203860,0.146  
4,3.683,rs4690060,0.183  
4,3.744,rs1751848,0.179  
4,3.760,rs1263446,0.179  
4,3.785,rs231395,0.185  
4,3.947,rs2515960,0.178  
4,4.270,rs2298969,0.169  
4,4.382,rs2798224,0.178  
4,4.386,rs16844106,0.178  
4,4.420,rs994426,0.177  
4,4.777,rs1406674,0.169  
4,4.837,rs762864,0.162  
4,4.951,rs16844364,0.140  
4,5.045,rs1203111,0.139  
4,5.159,rs6831256,0.134  
4,5.235,rs1881803,0.145  
4,5.353,rs3468,0.145  
4,5.471,rs1730775,0.150  
4,5.781,rs7699191,0.191  
4,5.964,rs16844952,0.181  
4,6.168,rs177798,0.191  
4,6.202,rs177766,0.189  
4,6.251,rs885797,0.202  
4,6.276,rs7377501,0.159  
4,6.307,rs445275,0.195  
4,6.317,rs4916612,0.162  
4,6.359,rs6822427,0.160  
4,6.563,rs3889790,0.255  
4,6.643,rs4974767,0.259

4,6.932,rs2920250,0.184  
4,7.029,rs2980098,0.167  
4,7.049,rs6835291,0.160  
4,7.176,rs7674400,0.141  
4,7.177,rs4279148,0.141  
4,7.179,rs4689340,0.142  
4,7.180,rs4478124,0.143  
4,7.184,rs12512085,0.153  
4,7.194,rs4305464,0.195  
4,7.198,rs3792686,0.204  
4,7.201,rs4555567,0.207  
4,7.320,rs4689888,0.193  
4,7.337,rs6446665,0.167  
4,7.338,rs4234835,0.167  
4,7.378,rs6830734,0.208  
4,7.393,rs7694788,0.187  
4,7.399,rs13149758,0.178  
4,7.411,rs7690052,0.149  
4,7.424,rs1000579,0.129  
4,7.426,rs1000578,0.128  
4,7.443,rs2172445,0.144  
4,7.458,rs6830371,0.120  
4,7.462,rs12186237,0.122  
4,7.482,rs2933573,0.133  
4,7.506,rs7666443,0.153  
4,7.522,rs3821949,0.150  
4,7.543,rs6817411,0.128  
4,7.547,rs2968686,0.129  
4,7.610,rs16836510,0.144  
4,7.709,rs4689967,0.188  
4,7.778,rs4392464,0.243  
4,7.808,rs6446309,0.261  
4,7.833,rs10937615,0.277  
4,7.899,rs11732574,0.307  
4,7.938,rs9799796,0.337  
4,7.977,rs1868047,0.366  
4,8.040,rs1447284,0.387  
4,8.112,rs6833812,0.398  
4,8.129,rs16836654,0.386  
4,8.149,rs6825132,0.374  
4,8.168,rs747224,0.323  
4,8.433,rs989707,0.383  
4,8.458,rs11731545,0.375  
4,8.470,rs1812310,0.373  
4,8.496,rs985222,0.368  
4,8.855,rs4689212,0.277  
4,9.029,rs739968,0.257  
4,9.053,rs2009157,0.257  
4,9.121,rs195098,0.258  
4,9.299,rs3774811,0.249  
4,9.376,rs16837352,0.236  
4,9.565,rs13113867,0.238  
4,9.655,rs13109991,0.217  
4,9.752,rs9993134,0.176  
4,9.816,rs10025465,0.151  
4,9.892,rs4689273,0.144  
4,9.967,rs7684327,0.148  
4,10.015,rs11725145,0.151  
4,10.070,rs2291157,0.154  
4,10.077,rs881686,0.154  
4,10.141,rs7674034,0.125

4,10.143,rs6414624,0.144  
4,10.143,rs1480169,0.143  
4,10.150,rs1871584,0.123  
4,10.172,rs3774861,0.122  
4,10.230,rs17747287,0.119  
4,10.353,rs7680768,0.140  
4,10.381,rs17748291,0.154  
4,10.386,rs11944616,0.157  
4,10.393,rs3774879,0.161  
4,10.457,rs13144677,0.160  
4,10.678,rs13146468,0.229  
4,10.707,rs4689294,0.234  
4,10.758,rs11727977,0.246  
4,10.761,rs17751160,0.245  
4,10.832,rs16837906,0.272  
4,10.927,rs10014397,0.339  
4,10.941,rs4689286,0.338  
4,10.974,rs7657266,0.329  
4,11.074,rs6819485,0.303  
4,11.174,rs17766228,0.284  
4,11.207,rs3901458,0.309  
4,11.224,rs6446452,0.313  
4,11.243,rs10516179,0.319  
4,11.329,rs11731332,0.343  
4,11.407,rs7687079,0.333  
4,11.416,rs4512066,0.323  
4,11.425,rs10017549,0.412  
4,11.465,rs4522943,0.324  
4,11.527,rs4688970,0.326  
4,11.606,rs4688973,0.336  
4,11.626,rs2137871,0.342  
4,11.649,rs4274923,0.359  
4,11.714,rs4688978,0.392  
4,11.727,rs13103694,0.396  
4,11.789,rs4689381,0.408  
4,11.977,rs10804976,0.383  
4,12.068,rs4689410,0.364  
4,12.081,rs6856061,0.327  
4,12.133,rs13124487,0.291  
4,12.187,rs4327561,0.266  
4,12.222,rs2240268,0.238  
4,12.256,rs7438559,0.177  
4,12.334,rs4345249,0.149  
4,12.495,rs4610412,0.158  
4,12.515,rs9654056,0.164  
4,12.577,rs4380587,0.191  
4,12.763,rs2301796,0.275  
4,12.843,rs11721430,0.301  
4,13.022,rs11736897,0.345  
4,13.200,rs4689510,0.359  
4,13.305,rs4493618,0.384  
4,13.466,rs16839178,0.397  
4,13.487,rs4689534,0.401  
4,13.536,rs4543114,0.423  
4,13.578,rs4689542,0.416  
4,13.621,rs4689050,0.405  
4,13.641,rs7681358,0.403  
4,13.643,rs4689545,0.402  
4,13.693,rs6854931,0.361  
4,13.995,rs6848312,0.453  
4,14.140,rs10022837,0.494



4,14.255,rs3901368,0.535  
4,14.323,rs4342189,0.601  
4,14.939,rs10937779,0.708  
4,15.351,rs11938388,0.816  
4,15.363,rs12647765,0.816  
4,15.431,rs10155062,0.819  
4,15.433,rs17807577,0.818  
4,15.448,rs4689066,0.815  
4,15.478,rs7687509,0.775  
4,15.478,rs3857190,0.774  
4,15.510,rs3901794,0.730  
4,15.614,rs4566655,0.761  
4,15.645,rs9999241,0.757  
4,15.694,rs6851506,0.785  
4,15.723,rs4689626,0.798  
4,15.869,rs12152570,0.827  
4,15.993,rs11931042,0.857  
4,16.052,rs905010,0.874  
4,16.070,rs9291133,0.878  
4,16.099,rs904989,0.919  
4,16.119,rs6845989,0.911  
4,16.123,rs6826089,0.905  
4,16.193,rs6814708,0.982  
4,16.210,rs12647543,0.983  
4,16.251,rs11946827,0.986  
4,16.359,rs11942816,0.991  
4,16.432,rs4689707,0.982  
4,16.449,rs3864202,0.981  
4,16.468,rs7657904,0.978  
4,16.503,rs16840080,0.977  
4,16.572,rs13110208,0.959  
4,16.622,rs17757615,0.955  
4,16.629,rs17814167,0.959  
4,16.695,rs3864210,0.873  
4,16.720,rs3864220,0.840  
4,16.814,rs16840236,0.770  
4,16.824,rs6830500,0.761  
4,16.895,rs4558873,0.788  
4,16.921,rs13105690,0.872  
4,16.924,rs7682286,0.875  
4,16.926,rs7663695,0.875  
4,16.946,rs9999662,0.873  
4,17.036,rs4689748,0.824  
4,17.069,rs4443286,0.805  
4,17.125,rs7694518,0.804  
4,17.156,rs7654086,0.802  
4,17.241,rs13353636,0.789  
4,17.263,rs17828052,0.789  
4,17.459,rs744355,0.788  
4,17.490,rs4429728,0.788  
4,17.512,rs10021708,0.801  
4,17.584,rs11721353,0.842  
4,17.703,rs7667548,0.910  
4,17.722,rs6858110,0.922  
4,17.778,rs10012347,0.936  
4,17.985,rs4689801,0.930  
4,18.052,rs4689148,0.931  
4,18.093,rs2158275,0.921  
4,18.148,rs2285789,0.912  
4,18.201,rs6810814,0.913  
4,18.221,rs10488964,0.908

4,18.235,rs6816649,0.914  
4,18.292,rs7697323,1.031  
4,18.314,rs16840826,1.064  
4,18.331,rs17381732,1.090  
4,18.403,rs2359630,1.078  
4,18.434,rs766008,1.062  
4,18.466,rs6816604,0.994  
4,18.467,rs2285781,0.993  
4,18.657,rs9968354,0.922  
4,18.913,rs6821044,0.911  
4,18.940,rs1106248,0.907  
4,18.951,rs6846245,0.906  
4,19.117,rs4689166,0.893  
4,19.686,rs4696833,0.872  
4,19.727,rs6824093,0.870  
4,19.767,rs4696709,0.868  
4,19.872,rs7677869,0.804  
4,19.896,rs4696662,0.786  
4,19.983,rs4696664,0.756  
4,20.020,rs4696729,0.755  
4,20.177,rs4696738,0.770  
4,20.264,rs4696669,0.790  
4,20.308,rs6829649,0.802  
4,20.331,rs6842276,0.808  
4,20.380,rs6447849,0.781  
4,20.493,rs4696758,0.777  
4,20.517,rs1878519,0.776  
4,20.595,rs4696765,0.692  
4,20.669,rs4422405,0.728  
4,20.711,rs4696769,0.713  
4,20.744,rs12506374,0.720  
4,20.832,rs10938694,0.721  
4,21.057,rs1712287,0.751  
4,21.087,rs1298145,0.755  
4,21.324,rs4696796,0.775  
4,21.337,rs4696812,0.767  
4,21.381,rs3796751,0.726  
4,21.483,rs3115397,0.650  
4,21.505,rs6447879,0.613  
4,21.517,rs3115378,0.695  
4,21.537,rs4235272,0.689  
4,21.580,rs9715724,0.658  
4,21.590,rs4696891,0.636  
4,21.607,rs7660783,0.596  
4,21.620,rs6817108,0.586  
4,21.647,rs10755200,0.580  
4,22.134,rs6858299,0.418  
4,22.295,rs13135278,0.381  
4,22.298,rs10049659,0.380  
4,22.551,rs10805346,0.354  
4,22.559,rs881971,0.352  
4,22.641,rs10012779,0.345  
4,22.730,rs11932627,0.331  
4,22.943,rs10939814,0.299  
4,23.121,rs7656072,0.250  
4,23.162,rs4333176,0.266  
4,23.180,rs13109005,0.274  
4,23.243,rs4697777,0.275  
4,23.481,rs16872571,0.258  
4,23.981,rs16873628,0.264  
4,24.284,rs959233,0.276

4,24.518,rs6821267,0.304  
4,24.602,rs10009111,0.303  
4,24.962,rs1110364,0.328  
4,25.351,rs12509327,0.367  
4,25.360,rs9291505,0.381  
4,25.367,rs1606724,0.391  
4,25.383,rs1355967,0.410  
4,25.387,rs2203396,0.410  
4,25.401,rs1533338,0.411  
4,25.442,rs1558402,0.401  
4,25.452,rs725432,0.412  
4,25.457,rs11731587,0.409  
4,25.471,rs2109600,0.384  
4,25.473,rs7660733,0.379  
4,25.490,rs224470,0.364  
4,25.512,rs1565924,0.331  
4,25.521,rs12647573,0.351  
4,25.527,rs17491203,0.400  
4,25.528,rs956469,0.406  
4,25.539,rs10049912,0.390  
4,25.560,rs10032590,0.392  
4,25.608,rs11729868,0.410  
4,25.618,rs6825825,0.417  
4,25.632,rs923747,0.427  
4,25.677,rs6843251,0.391  
4,25.724,rs7696250,0.314  
4,25.742,rs6448852,0.293  
4,25.859,rs10516251,0.288  
4,25.873,rs1454878,0.300  
4,25.924,rs9283696,0.323  
4,25.961,rs7656574,0.313  
4,26.169,rs13151965,0.262  
4,26.247,rs6448952,0.252  
4,26.337,rs7697105,0.238  
4,26.396,rs223976,0.238  
4,26.400,rs223982,0.238  
4,26.422,rs2867020,0.238  
4,26.452,rs4834860,0.189  
4,26.472,rs2903472,0.196  
4,26.486,rs481012,0.201  
4,26.503,rs1021873,0.234  
4,26.506,rs512244,0.237  
4,26.523,rs510171,0.252  
4,26.545,rs490325,0.268  
4,26.637,rs11729455,0.283  
4,26.645,rs16888468,0.290  
4,26.649,rs1014335,0.291  
4,26.727,rs2109590,0.294  
4,26.967,rs2075050,0.301  
4,26.974,rs10034452,0.300  
4,27.079,rs1013300,0.299  
4,27.223,rs1586761,0.249  
4,27.253,rs1491267,0.240  
4,27.309,rs759261,0.220  
4,27.386,rs1008218,0.197  
4,27.391,rs1019271,0.205  
4,27.407,rs716424,0.181  
4,27.423,rs10489088,0.194  
4,27.426,rs10012159,0.197  
4,27.443,rs7660348,0.199  
4,27.654,rs971079,0.242

4,27.981,rs3846415,0.285  
4,28.047,rs9998508,0.287  
4,28.166,rs3096579,0.288  
4,28.171,rs12499689,0.288  
4,28.182,rs1991268,0.282  
4,28.188,rs6826155,0.278  
4,28.213,rs2079949,0.273  
4,28.241,rs16890128,0.282  
4,28.246,rs6449012,0.279  
4,28.301,rs9996349,0.248  
4,28.363,rs1013284,0.214  
4,28.372,rs7654792,0.239  
4,28.377,rs6449024,0.239  
4,28.627,rs1501180,0.236  
4,28.786,rs4550921,0.220  
4,28.802,rs764759,0.220  
4,28.867,rs4327484,0.243  
4,28.940,rs11724609,0.235  
4,29.047,rs11731529,0.253  
4,29.114,rs1316686,0.279  
4,29.172,rs9884305,0.291  
4,29.178,rs1494951,0.290  
4,29.194,rs16891148,0.289  
4,29.238,rs7656729,0.277  
4,29.269,rs1494957,0.268  
4,29.291,rs6449093,0.264  
4,29.553,rs11721627,0.220  
4,29.580,rs2604562,0.193  
4,29.665,rs10516285,0.207  
4,29.730,rs6811795,0.216  
4,30.123,rs2160043,0.204  
4,30.457,rs3213710,0.222  
4,30.535,rs10002171,0.240  
4,30.647,rs10805347,0.269  
4,30.698,rs2531166,0.246  
4,30.731,rs2191003,0.264  
4,30.759,rs2531149,0.274  
4,30.771,rs11723486,0.315  
4,30.790,rs11730943,0.332  
4,30.814,rs9968276,0.346  
4,30.842,rs12506181,0.371  
4,30.883,rs3796850,0.393  
4,30.884,rs717176,0.394  
4,30.908,rs2313734,0.396  
4,30.919,rs17387327,0.370  
4,30.922,rs2286455,0.363  
4,30.932,rs7663999,0.357  
4,30.939,rs884718,0.353  
4,30.994,rs1004861,0.335  
4,30.994,rs11935542,0.334  
4,30.998,rs1712493,0.332  
4,31.051,rs11730743,0.334  
4,31.368,rs2215637,0.305  
4,31.626,rs4321631,0.291  
4,31.787,rs6449244,0.292  
4,31.874,rs4698149,0.317  
4,31.914,rs7440228,0.324  
4,31.914,rs10026610,0.324  
4,31.966,rs7672573,0.363  
4,31.992,rs1501140,0.362  
4,32.049,rs3792679,0.360

4,32.074,rs6843498,0.356  
4,32.089,rs10020336,0.335  
4,32.100,rs10805351,0.320  
4,32.154,rs13113158,0.305  
4,32.162,rs1501127,0.303  
4,32.282,rs1496747,0.326  
4,32.387,rs924158,0.327  
4,32.413,rs3763969,0.328  
4,32.462,rs1027784,0.309  
4,32.466,rs6449262,0.308  
4,32.484,rs6851110,0.268  
4,32.491,rs7660353,0.270  
4,32.500,rs7661729,0.273  
4,32.660,rs283018,0.390  
4,32.784,rs207699,0.357  
4,32.957,rs207713,0.390  
4,33.002,rs11734663,0.397  
4,33.184,rs917494,0.382  
4,33.477,rs13107569,0.355  
4,33.485,rs1356028,0.354  
4,33.880,rs6449278,0.390  
4,34.043,rs584272,0.374  
4,34.109,rs1981693,0.332  
4,34.110,rs6847269,0.331  
4,34.138,rs10939711,0.317  
4,34.139,rs4698560,0.316  
4,34.148,rs6810740,0.318  
4,34.211,rs6843133,0.337  
4,34.340,rs1901168,0.384  
4,34.395,rs2597751,0.312  
4,34.397,rs4698599,0.313  
4,34.431,rs2518649,0.334  
4,34.436,rs6843189,0.327  
4,34.502,rs1860596,0.307  
4,34.572,rs16895707,0.349  
4,34.668,rs1506613,0.393  
4,34.779,rs7684006,0.411  
4,34.796,rs1847401,0.398  
4,34.842,rs10488994,0.337  
4,34.851,rs2192521,0.328  
4,34.857,rs6836877,0.320  
4,34.883,rs741207,0.292  
4,35.088,rs10027409,0.266  
4,35.296,rs13145150,0.215  
4,35.328,rs7658418,0.179  
4,35.344,rs6833091,0.176  
4,35.600,rs13107783,0.163  
4,35.638,rs1032133,0.165  
4,35.851,rs812652,0.139  
4,35.889,rs559767,0.136  
4,35.933,rs16869461,0.132  
4,35.996,rs9993087,0.125  
4,35.997,rs4696953,0.125  
4,36.002,rs10938796,0.125  
4,36.178,rs11942897,0.110  
4,36.190,rs1033111,0.111  
4,36.215,rs16869665,0.113  
4,36.221,rs4443280,0.092  
4,36.258,rs6825654,0.098  
4,36.261,rs519813,0.098  
4,36.279,rs6816854,0.096

4,36.281,rs520535,0.096  
4,36.292,rs7669094,0.096  
4,36.303,rs17542486,0.097  
4,36.321,rs506358,0.101  
4,36.374,rs2322559,0.107  
4,36.393,rs17544103,0.111  
4,36.404,rs936359,0.113  
4,36.417,rs1465522,0.101  
4,36.606,rs7657542,0.192  
4,36.612,rs13129008,0.196  
4,36.614,rs16869949,0.197  
4,36.683,rs1863633,0.233  
4,36.701,rs12501548,0.243  
4,36.703,rs11734471,0.270  
4,36.714,rs10013103,0.272  
4,36.739,rs1352797,0.272  
4,36.756,rs4697192,0.272  
4,36.772,rs1565534,0.305  
4,36.877,rs1434954,0.311  
4,37.003,rs10034991,0.295  
4,37.041,rs4389575,0.295  
4,37.065,rs6853609,0.304  
4,37.180,rs10011670,0.329  
4,37.181,rs10007205,0.329  
4,37.229,rs4696973,0.313  
4,37.231,rs6858452,0.281  
4,37.246,rs16870878,0.275  
4,37.248,rs17521122,0.272  
4,37.261,rs1908552,0.258  
4,37.267,rs6448050,0.251  
4,37.269,rs1874341,0.249  
4,37.281,rs1476279,0.238  
4,37.291,rs16871128,0.236  
4,37.356,rs16871434,0.221  
4,37.360,rs16871465,0.220  
4,37.361,rs1604805,0.220  
4,37.362,rs402802,0.220  
4,37.405,rs2323070,0.215  
4,37.429,rs7666642,0.190  
4,37.453,rs1354390,0.189  
4,37.468,rs4235291,0.189  
4,37.559,rs4377576,0.203  
4,37.605,rs10516407,0.229  
4,37.674,rs2007195,0.244  
4,37.880,rs4697275,0.243  
4,37.942,rs6448144,0.256  
4,37.968,rs1983021,0.263  
4,38.038,rs16872651,0.275  
4,38.080,rs1841823,0.294  
4,38.090,rs10516410,0.302  
4,38.112,rs2009731,0.344  
4,38.149,rs17539365,0.367  
4,38.298,rs3099557,0.390  
4,38.310,rs439863,0.390  
4,38.449,rs2323700,0.414  
4,38.510,rs13132256,0.424  
4,38.818,rs7697052,0.451  
4,38.995,rs1858113,0.465  
4,39.157,rs215410,0.468  
4,39.240,rs10010445,0.400  
4,39.298,rs1155194,0.423

4,39.333,rs10517018,0.436  
4,39.334,rs950950,0.437  
4,39.355,rs10027997,0.444  
4,39.355,rs1397829,0.444  
4,39.418,rs13109659,0.444  
4,39.469,rs16874043,0.440  
4,39.472,rs1491389,0.440  
4,39.479,rs16874072,0.431  
4,39.526,rs12650562,0.409  
4,39.554,rs6448226,0.404  
4,39.574,rs7437482,0.451  
4,39.584,rs4235308,0.451  
4,39.607,rs4469064,0.395  
4,39.635,rs2946394,0.394  
4,39.716,rs1316862,0.354  
4,39.876,rs16875028,0.346  
4,39.896,rs2215492,0.345  
4,39.990,rs1995917,0.320  
4,40.019,rs10938983,0.299  
4,40.026,rs7662477,0.294  
4,40.031,rs7666134,0.293  
4,40.060,rs17648420,0.290  
4,40.128,rs9685879,0.296  
4,40.142,rs13143233,0.297  
4,40.354,rs3857105,0.309  
4,40.811,rs7690462,0.330  
4,40.903,rs17651313,0.320  
4,40.957,rs6817993,0.310  
4,41.056,rs17651758,0.272  
4,41.241,rs11737023,0.270  
4,41.380,rs12506649,0.250  
4,41.482,rs10517052,0.249  
4,41.588,rs1395221,0.288  
4,41.611,rs4312745,0.291  
4,41.632,rs12507254,0.294  
4,41.690,rs1476880,0.317  
4,41.695,rs12500612,0.318  
4,41.745,rs2284659,0.287  
4,41.830,rs4697489,0.296  
4,41.840,rs10939012,0.296  
4,41.846,rs4697075,0.297  
4,41.887,rs3846336,0.313  
4,42.003,rs4697516,0.328  
4,42.037,rs6853990,0.331  
4,42.072,rs4697525,0.396  
4,42.102,rs736831,0.412  
4,42.172,rs7654693,0.419  
4,42.174,rs6817894,0.419  
4,42.174,rs4697534,0.420  
4,42.176,rs2098302,0.420  
4,42.185,rs2324654,0.419  
4,42.258,rs759243,0.378  
4,42.850,rs13121078,0.331  
4,42.931,rs13133104,0.324  
4,43.017,rs1963656,0.321  
4,43.132,rs16877042,0.323  
4,43.678,rs6837837,0.347  
4,43.841,rs13116199,0.342  
4,43.844,rs1399240,0.342  
4,44.038,rs6851586,0.298  
4,44.285,rs871476,0.253

4,44.436,rs16877245,0.239  
4,44.473,rs7689639,0.234  
4,44.584,rs7664681,0.202  
4,44.702,rs939356,0.150  
4,44.717,rs7671379,0.161  
4,44.750,rs4580639,0.166  
4,44.804,rs3733545,0.154  
4,44.805,rs4374611,0.154  
4,44.806,rs4697598,0.153  
4,44.849,rs7692656,0.160  
4,44.890,rs11721812,0.156  
4,44.940,rs2276950,0.146  
4,44.958,rs6448402,0.142  
4,44.971,rs2309286,0.143  
4,45.065,rs6847559,0.188  
4,45.107,rs6831024,0.189  
4,45.120,rs731284,0.205  
4,45.189,rs878552,0.194  
4,45.268,rs6820447,0.152  
4,45.282,rs936236,0.170  
4,45.373,rs4269167,0.169  
4,45.392,rs4692317,0.158  
4,45.486,rs6827904,0.140  
4,45.496,rs4692073,0.138  
4,45.547,rs4692386,0.119  
4,45.555,rs7682322,0.115  
4,45.578,rs4692399,0.130  
4,45.619,rs1512105,0.145  
4,45.655,rs10017756,0.145  
4,45.661,rs10005500,0.149  
4,45.688,rs10939100,0.161  
4,45.719,rs3857127,0.156  
4,45.755,rs10028140,0.150  
4,45.858,rs3822223,0.130  
4,46.050,rs10805262,0.116  
4,46.098,rs716073,0.125  
4,46.117,rs967413,0.132  
4,46.156,rs2130250,0.132  
4,46.200,rs4692540,0.147  
4,46.206,rs6838762,0.146  
4,46.270,rs2014308,0.129  
4,46.693,rs6448475,0.144  
4,46.699,rs6839242,0.123  
4,46.705,rs4407490,0.123  
4,46.878,rs7658174,0.112  
4,47.067,rs7678869,0.116  
4,47.077,rs4692020,0.134  
4,47.135,rs2041627,0.114  
4,47.169,rs969949,0.104  
4,47.177,rs6813524,0.103  
4,47.322,rs901832,0.102  
4,47.322,rs901833,0.101  
4,47.357,rs1488299,0.080  
4,47.362,rs748057,0.063  
4,47.371,rs6848074,0.061  
4,47.411,rs4692196,0.040  
4,47.422,rs9291495,0.046  
4,47.426,rs13134892,0.044  
4,47.486,rs210782,0.026  
4,47.561,rs10506518,0.021  
4,47.590,rs6847492,0.021



4,47.630,rs2034472,0.026  
4,47.659,rs6448532,0.047  
4,47.697,rs10014448,0.051  
4,47.726,rs16879804,0.063  
4,47.814,rs10016121,0.100  
4,47.825,rs9990661,0.084  
4,47.841,rs2058574,0.101  
4,47.968,rs1527328,0.097  
4,47.993,rs10009033,0.099  
4,48.008,rs16880367,0.119  
4,48.034,rs2309717,0.123  
4,48.510,rs675680,0.134  
4,48.930,rs1389169,0.125  
4,49.034,rs9685881,0.115  
4,49.108,rs11946866,0.088  
4,49.277,rs6850637,0.102  
4,49.301,rs4441746,0.103  
4,49.425,rs12647787,0.119  
4,49.481,rs1402499,0.100  
4,49.497,rs4326073,0.103  
4,49.581,rs6815902,0.105  
4,49.657,rs1402481,0.126  
4,49.706,rs4401510,0.138  
4,49.839,rs13148111,0.114  
4,49.873,rs6448638,0.117  
4,49.897,rs181999,0.094  
4,49.925,rs11936766,0.088  
4,50.196,rs6853827,0.097  
4,50.230,rs2047870,0.083  
4,50.340,rs10001348,0.103  
4,50.409,rs3884638,0.113  
4,50.530,rs7689614,0.150  
4,50.537,rs1469784,0.149  
4,50.542,rs2613167,0.148  
4,50.585,rs2571468,0.130  
4,50.664,rs1435779,0.128  
4,50.721,rs12509641,0.129  
4,50.731,rs7681280,0.128  
4,50.777,rs2164384,0.138  
4,50.825,rs6812829,0.158  
4,50.879,rs13131444,0.182  
4,51.095,rs6816969,0.179  
4,51.239,rs7659873,0.190  
4,51.405,rs6820873,0.203  
4,51.441,rs2201945,0.204  
4,51.475,rs16884372,0.212  
4,51.531,rs1353854,0.225  
4,51.590,rs6448754,0.256  
4,51.621,rs6849452,0.274  
4,51.707,rs11735188,0.294  
4,51.776,rs11935585,0.315  
4,51.819,rs6827566,0.326  
4,51.835,rs4692508,0.330  
4,51.845,rs2081665,0.333  
4,52.047,rs446149,0.378  
4,52.312,rs11944702,0.424  
4,52.387,rs2192531,0.421  
4,52.392,rs13133369,0.419  
4,52.406,rs17595220,0.416  
4,52.457,rs1861127,0.401  
4,52.495,rs965954,0.365

4,52.498,rs17604071,0.350  
4,52.505,rs2310395,0.317  
4,52.627,rs1523145,0.297  
4,52.698,rs10027346,0.329  
4,52.700,rs17742652,0.330  
4,52.763,rs6816397,0.334  
4,52.849,rs1996886,0.279  
4,52.920,rs4568279,0.217  
4,52.944,rs7663866,0.202  
4,53.026,rs7697063,0.240  
4,53.169,rs11096807,0.359  
4,53.172,rs7680581,0.361  
4,53.218,rs2687386,0.396  
4,53.304,rs6824666,0.438  
4,53.319,rs10517277,0.438  
4,53.331,rs7665332,0.437  
4,53.384,rs10025535,0.441  
4,53.483,rs6531772,0.466  
4,54.012,rs6849320,0.534  
4,54.126,rs921853,0.583  
4,54.210,rs1023933,0.612  
4,54.270,rs11947034,0.527  
4,54.340,rs6849048,0.496  
4,54.695,rs12502892,0.603  
4,54.730,rs2889174,0.623  
4,54.835,rs2271810,0.590  
4,54.875,rs6812542,0.591  
4,54.993,rs7680904,0.623  
4,55.008,rs4481252,0.626  
4,55.169,rs2055411,0.654  
4,55.235,rs9995922,0.639  
4,55.257,rs16992103,0.635  
4,55.276,rs1392891,0.630  
4,55.291,rs16992175,0.625  
4,55.363,rs6855055,0.600  
4,55.386,rs4605678,0.591  
4,55.476,rs2375971,0.543  
4,55.623,rs17465676,0.470  
4,55.656,rs2376150,0.467  
4,55.936,rs1373474,0.432  
4,55.954,rs4832844,0.425  
4,55.967,rs1584108,0.413  
4,56.108,rs4289452,0.318  
4,56.177,rs10484216,0.321  
4,56.209,rs1648395,0.314  
4,56.280,rs17603438,0.300  
4,56.282,rs7661725,0.299  
4,56.324,rs1656235,0.285  
4,56.334,rs13115793,0.288  
4,56.362,rs17575890,0.288  
4,56.396,rs3892368,0.270  
4,56.418,rs764882,0.258  
4,56.421,rs7375557,0.256  
4,56.438,rs10028027,0.248  
4,56.450,rs6816980,0.250  
4,56.455,rs1463575,0.251  
4,56.494,rs2939748,0.306  
4,56.504,rs10517412,0.339  
4,56.504,rs17604934,0.340  
4,56.528,rs7655445,0.342  
4,56.541,rs17605100,0.362

4,56.548,rs11723493,0.373  
4,56.624,rs2973280,0.407  
4,56.694,rs3756143,0.397  
4,56.719,rs9998333,0.395  
4,56.806,rs2009494,0.372  
4,56.849,rs12505604,0.365  
4,56.924,rs10517429,0.336  
4,56.952,rs4832940,0.329  
4,56.978,rs7692977,0.354  
4,57.069,rs3775793,0.335  
4,57.086,rs10001580,0.317  
4,57.134,rs17578829,0.265  
4,57.164,rs2995919,0.236  
4,57.172,rs2995916,0.230  
4,57.200,rs4832745,0.214  
4,57.252,rs11736130,0.221  
4,57.311,rs7672883,0.210  
4,57.444,rs10517469,0.177  
4,57.549,rs4832749,0.129  
4,57.574,rs586844,0.107  
4,57.597,rs4833009,0.104  
4,57.631,rs2381135,0.083  
4,57.649,rs6857949,0.074  
4,57.673,rs907314,0.062  
4,57.715,rs4833029,0.067  
4,57.721,rs10517472,0.054  
4,57.784,rs13139166,0.073  
4,57.841,rs6810650,0.067  
4,57.981,rs4131726,0.058  
4,58.065,rs2637729,0.044  
4,58.086,rs16994601,0.042  
4,58.088,rs7675136,0.042  
4,58.134,rs7654396,0.036  
4,58.172,rs16994672,0.035  
4,58.242,rs1824652,0.033  
4,58.327,rs17500878,0.032  
4,58.355,rs1005761,0.032  
4,58.363,rs7658334,0.033  
4,58.382,rs6823756,0.035  
4,58.617,rs12641669,0.080  
4,58.629,rs7676657,0.080  
4,58.673,rs6531684,0.078  
4,58.678,rs2011590,0.076  
4,58.702,rs17583426,0.077  
4,58.743,rs17583481,0.080  
4,58.768,rs11096969,0.070  
4,59.310,rs2062228,0.069  
4,59.351,rs13135439,0.069  
4,59.371,rs13147477,0.072  
4,59.399,rs2687963,0.077  
4,59.477,rs2687965,0.079  
4,59.690,rs977385,0.074  
4,59.779,rs3912392,0.072  
4,59.922,rs11097004,0.094  
4,59.961,rs50296,0.112  
4,60.179,rs557980,0.120  
4,60.233,rs11737408,0.111  
4,60.438,rs807787,0.083  
4,60.510,rs1397934,0.096  
4,60.528,rs1317577,0.098  
4,60.562,rs4974974,0.081

4,60.570,rs2381501,0.081  
4,60.660,rs12643250,0.114  
4,60.693,rs9683756,0.117  
4,60.721,rs11932152,0.132  
4,60.824,rs4861307,0.122  
4,60.896,rs902856,0.131  
4,60.909,rs17440690,0.134  
4,60.927,rs278973,0.140  
4,60.929,rs4476635,0.142  
4,60.971,rs203273,0.153  
4,60.989,rs278981,0.155  
4,61.000,rs3105208,0.147  
4,61.036,rs7689954,0.143  
4,61.057,rs278949,0.148  
4,61.114,rs4861170,0.156  
4,61.115,rs10517543,0.155  
4,61.142,rs6835176,0.138  
4,61.209,rs4632692,0.089  
4,61.321,rs17513191,0.054  
4,61.358,rs6829898,0.022  
4,61.525,rs7679359,0.022  
4,61.589,rs10017429,0.023  
4,61.610,rs2035385,0.022  
4,61.684,rs6830900,0.017  
4,61.732,rs4516756,0.013  
4,61.770,rs11727143,0.012  
4,62.000,rs4861067,0.004  
4,62.053,rs719379,0.002  
4,62.140,rs4861322,0.001  
4,62.297,rs11733857,0.000  
4,62.370,rs6832948,0.000  
4,62.437,rs1032984,0.000  
4,62.461,rs9992186,0.001  
4,62.655,rs13129535,0.009  
4,62.706,rs1110281,0.010  
4,62.762,rs6842814,0.011  
4,62.763,rs17443381,0.011  
4,62.773,rs7695309,0.012  
4,62.773,rs6811777,0.013  
4,62.837,rs12186184,0.017  
4,62.868,rs16853120,0.017  
4,62.917,rs17628171,0.011  
4,62.925,rs13140742,0.010  
4,62.956,rs4527518,0.006  
4,62.968,rs7665984,0.005  
4,63.029,rs6447085,0.006  
4,63.095,rs10026359,0.003  
4,63.144,rs11734372,0.000  
4,63.171,rs12650313,0.000  
4,63.240,rs1154598,-0.001  
4,63.252,rs6834302,-0.001  
4,63.257,rs7664468,-0.001  
4,63.465,rs17530357,0.004  
4,63.513,rs4132888,0.005  
4,63.546,rs13151738,0.005  
4,63.579,rs7674997,0.004  
4,63.583,rs9999533,0.004  
4,63.596,rs17530621,0.002  
4,63.734,rs3103218,-0.000  
4,63.818,rs4280770,0.001  
4,63.932,rs898500,0.000

4,63.943,rs7693131,0.001  
4,64.021,rs13146994,0.004  
4,64.086,rs17637607,0.004  
4,64.095,rs1562840,0.004  
4,64.116,rs11728299,0.005  
4,64.270,rs920152,0.014  
4,64.285,rs4447896,0.015  
4,64.302,rs1442855,0.015  
4,64.316,rs671254,0.014  
4,64.403,rs16856334,0.011  
4,64.576,rs10938307,0.008  
4,64.672,rs2722147,0.007  
4,64.700,rs6834369,0.007  
4,64.755,rs4695447,0.005  
4,64.927,rs4695701,0.004  
4,65.030,rs11941070,0.007  
4,65.037,rs6853031,0.007  
4,65.043,rs17599591,0.007  
4,65.061,rs4312793,0.008  
4,65.098,rs16857230,0.005  
4,65.106,rs1388311,0.004  
4,65.165,rs2882027,0.004  
4,65.180,rs10155504,0.005  
4,65.187,rs4306991,0.006  
4,65.197,rs16858015,0.006  
4,65.209,rs12641981,0.006  
4,65.242,rs2349125,0.005  
4,65.247,rs1476295,0.005  
4,65.319,rs840193,0.004  
4,65.361,rs6829634,0.004  
4,65.441,rs1456508,0.004  
4,65.461,rs1389040,0.004  
4,65.514,rs2035906,0.004  
4,65.561,rs7685154,0.004  
4,65.594,rs1394346,0.005  
4,65.675,rs1391174,0.006  
4,65.682,rs13109156,0.005  
4,65.901,rs4478161,0.000  
4,65.962,rs10517174,0.000  
4,65.968,rs6447520,0.000  
4,65.969,rs1512142,0.000  
4,65.986,rs10015366,0.001  
4,65.999,rs1866990,0.000  
4,66.037,rs1372497,-0.000  
4,66.038,rs12501459,-0.000  
4,66.096,rs3822113,-0.000  
4,66.103,rs13102764,-0.000  
4,66.123,rs10938487,0.000  
4,66.124,rs4292304,0.001  
4,66.126,rs4235151,0.001  
4,66.128,rs6829033,0.001  
4,66.136,rs12374260,0.003  
4,66.152,rs7694197,0.003  
4,66.159,rs6832495,0.003  
4,66.183,rs13118104,0.003  
4,66.212,rs9996629,0.003  
4,66.226,rs16860658,0.003  
4,66.280,rs17654757,0.003  
4,66.297,rs4340770,0.004  
4,66.299,rs17470528,0.004  
4,66.335,rs3792622,0.007

4,66.349,rs1912163,0.008  
4,66.378,rs309890,0.010  
4,66.381,rs4599384,0.011  
4,66.384,rs10517217,0.010  
4,66.393,rs6447636,0.007  
4,66.430,rs2354947,0.013  
4,66.745,rs225160,0.028  
4,66.761,rs6554360,0.032  
4,66.792,rs13435749,0.032  
4,66.814,rs346005,0.019  
4,67.162,rs301126,0.020  
4,67.198,rs301088,0.020  
4,67.330,rs11934112,0.019  
4,67.389,rs4864728,0.018  
4,67.579,rs11725172,0.016  
4,67.720,rs4864763,0.011  
4,67.760,rs9999406,0.009  
4,67.781,rs1435219,0.009  
4,67.790,rs17660061,0.009  
4,67.865,rs959094,0.009  
4,67.870,rs2616417,0.009  
4,67.930,rs2199574,0.008  
4,67.956,rs715155,0.015  
4,67.958,rs728587,0.015  
4,68.018,rs2412494,0.016  
4,68.121,rs4864829,0.018  
4,68.226,rs12500026,0.016  
4,68.350,rs1357133,0.017  
4,68.737,rs13117345,0.015  
4,68.778,rs6554147,0.015  
4,68.817,rs6554150,0.010  
4,68.885,rs12233727,0.019  
4,68.918,rs7656613,0.025  
4,68.921,rs1547904,0.024  
4,68.946,rs11729535,0.015  
4,68.959,rs2412563,0.008  
4,68.997,rs10517334,0.006  
4,69.077,rs6554190,0.004  
4,69.147,rs218273,0.003  
4,69.202,rs4864910,0.006  
4,69.257,rs2703457,0.004  
4,69.301,rs7695300,0.003  
4,69.444,rs2213180,0.027  
4,69.458,rs4406072,0.028  
4,69.504,rs3109915,0.033  
4,69.510,rs11732323,0.033  
4,69.575,rs2412611,0.030  
4,69.612,rs1948607,0.028  
4,69.755,rs1497482,0.022  
4,69.878,rs6842830,0.017  
4,69.882,rs4262039,0.016  
4,69.887,rs4864948,0.015  
4,69.890,rs4453992,0.014  
4,69.920,rs4864949,0.009  
4,70.011,rs17709898,0.034  
4,70.046,rs2305948,0.050  
4,70.067,rs2071559,0.057  
4,70.323,rs4864976,0.049  
4,70.377,rs17776421,0.048  
4,70.519,rs11943456,0.041  
4,70.895,rs1488938,0.023

4,71.005,rs7665149,0.015  
4,71.075,rs11725155,0.007  
4,71.094,rs7677808,0.009  
4,71.121,rs1955161,0.010  
4,71.198,rs1447050,0.012  
4,71.442,rs4526032,0.013  
4,71.580,rs2412723,0.017  
4,71.695,rs6554340,0.008  
4,71.804,rs533178,0.014  
4,71.829,rs490591,0.009  
4,71.868,rs7663149,0.004  
4,71.905,rs7663516,0.004  
4,71.920,rs1401910,0.004  
4,72.176,rs13102012,0.001  
4,72.710,rs4270628,0.000  
4,72.749,rs7691920,0.001  
4,72.785,rs7670824,0.001  
4,72.804,rs7699631,0.001  
4,72.840,rs4371677,0.003  
4,72.879,rs9968381,0.005  
4,72.915,rs4864599,0.008  
4,72.930,rs10222715,0.016  
4,72.945,rs6811987,0.019  
4,72.963,rs2412757,0.025  
4,72.998,rs781542,0.027  
4,73.005,rs1399002,0.029  
4,73.048,rs4560473,0.042  
4,73.090,rs1713985,0.045  
4,73.198,rs1277311,0.053  
4,73.204,rs1277273,0.054  
4,73.217,rs1713959,0.054  
4,73.259,rs10004910,0.052  
4,73.303,rs4579186,0.048  
4,73.348,rs10014421,0.058  
4,73.350,rs10488926,0.061  
4,73.365,rs4865199,0.084  
4,73.367,rs6812462,0.085  
4,73.396,rs11731338,0.094  
4,73.419,rs2191574,0.088  
4,73.446,rs6840839,0.089  
4,73.455,rs1524686,0.089  
4,73.540,rs1012188,0.101  
4,73.579,rs1561660,0.108  
4,73.612,rs7696759,0.115  
4,73.731,rs4557336,0.134  
4,73.769,rs1425320,0.136  
4,73.810,rs343501,0.146  
4,73.853,rs343549,0.172  
4,73.899,rs13134774,0.216  
4,73.908,rs4865283,0.226  
4,73.928,rs7679186,0.243  
4,73.928,rs12505795,0.243  
4,73.932,rs3843894,0.229  
4,73.935,rs983355,0.221  
4,73.945,rs922605,0.228  
4,74.007,rs1480332,0.185  
4,74.017,rs7657187,0.186  
4,74.121,rs1507578,0.202  
4,74.127,rs1380196,0.198  
4,74.136,rs2174809,0.192  
4,74.147,rs2660943,0.183

4,74.213,rs10517437,0.183  
4,74.271,rs2570100,0.150  
4,74.520,rs4864655,0.225  
4,74.592,rs9942216,0.247  
4,74.638,rs7674325,0.234  
4,74.647,rs2333727,0.230  
4,74.740,rs7663467,0.234  
4,74.747,rs7693572,0.235  
4,74.758,rs9312092,0.237  
4,74.819,rs1511404,0.253  
4,74.863,rs6811282,0.242  
4,74.910,rs970313,0.233  
4,75.022,rs9312186,0.226  
4,75.074,rs1834384,0.241  
4,75.100,rs13112895,0.251  
4,75.104,rs349235,0.252  
4,75.109,rs349215,0.254  
4,75.381,rs6852374,0.344  
4,75.447,rs6843734,0.370  
4,75.463,rs10024649,0.370  
4,75.494,rs4460023,0.371  
4,75.597,rs10022351,0.401  
4,75.622,rs1906073,0.414  
4,75.685,rs7699691,0.418  
4,75.699,rs4599440,0.406  
4,75.725,rs10866114,0.403  
4,75.730,rs930668,0.404  
4,75.787,rs6854914,0.409  
4,75.807,rs924940,0.407  
4,75.810,rs1827770,0.374  
4,75.830,rs10517529,0.377  
4,75.854,rs9998310,0.399  
4,75.857,rs7695405,0.398  
4,75.861,rs2880363,0.363  
4,75.930,rs17090446,0.388  
4,75.953,rs10428284,0.396  
4,75.959,rs2124794,0.398  
4,76.013,rs10016690,0.395  
4,76.015,rs335271,0.394  
4,76.109,rs7666147,0.434  
4,76.190,rs12646895,0.468  
4,76.244,rs6846033,0.510  
4,76.274,rs12648453,0.529  
4,76.353,rs1397546,0.568  
4,76.429,rs1124974,0.616  
4,76.466,rs7694238,0.610  
4,76.561,rs11131367,0.553  
4,76.602,rs2697201,0.510  
4,76.616,rs12640895,0.493  
4,76.626,rs17292275,0.492  
4,76.641,rs13126803,0.498  
4,76.671,rs1031536,0.510  
4,76.684,rs6854419,0.508  
4,76.722,rs12500171,0.504  
4,76.742,rs12509725,0.504  
4,76.790,rs12508568,0.504  
4,76.849,rs2036639,0.501  
4,76.852,rs12649725,0.502  
4,76.880,rs1507317,0.516  
4,76.893,rs11932508,0.522  
4,76.962,rs2346648,0.494



4,77.102,rs9999371,0.505  
4,77.104,rs2346937,0.505  
4,77.133,rs2346939,0.465  
4,77.198,rs549815,0.449  
4,77.278,rs6855459,0.437  
4,77.328,rs10452252,0.435  
4,77.629,rs1402142,0.412  
4,77.816,rs1483288,0.493  
4,77.862,rs2086731,0.523  
4,77.876,rs1425395,0.519  
4,77.926,rs11937285,0.498  
4,77.943,rs6828768,0.490  
4,77.969,rs1430519,0.511  
4,78.094,rs1440949,0.448  
4,78.213,rs1451160,0.432  
4,78.222,rs986208,0.432  
4,78.425,rs10012882,0.426  
4,78.657,rs6831652,0.417  
4,78.689,rs4425430,0.420  
4,78.694,rs4337775,0.421  
4,78.710,rs4518304,0.420  
4,78.719,rs6854088,0.424  
4,78.750,rs11727254,0.377  
4,78.753,rs4629506,0.373  
4,78.761,rs10009221,0.372  
4,78.783,rs17082137,0.414  
4,78.799,rs10517949,0.419  
4,78.865,rs1461827,0.449  
4,78.872,rs10517955,0.488  
4,78.873,rs2588666,0.491  
4,78.874,rs1436,0.494  
4,78.881,rs2061459,0.509  
4,78.887,rs10011993,0.483  
4,78.940,rs2175431,0.440  
4,78.962,rs1512965,0.443  
4,78.964,rs7663168,0.424  
4,79.030,rs1397470,0.396  
4,79.105,rs10518013,0.349  
4,79.112,rs13144587,0.348  
4,79.135,rs1450036,0.354  
4,79.167,rs1450024,0.366  
4,79.307,rs730934,0.342  
4,79.332,rs1425655,0.307  
4,79.379,rs746877,0.271  
4,79.395,rs10008670,0.276  
4,79.400,rs7669658,0.277  
4,79.454,rs1056787,0.306  
4,79.491,rs354883,0.337  
4,79.551,rs972072,0.358  
4,79.552,rs6828922,0.358  
4,79.586,rs1371928,0.388  
4,79.593,rs1348079,0.364  
4,79.625,rs353158,0.376  
4,79.695,rs6826271,0.405  
4,79.842,rs17590869,0.401  
4,79.940,rs939207,0.397  
4,79.980,rs17592868,0.390  
4,79.980,rs7666993,0.390  
4,79.987,rs17652284,0.389  
4,80.294,rs293433,0.284  
4,80.380,rs1379809,0.256

4,80.403,rs4149418,0.252  
4,80.407,rs1847366,0.258  
4,80.464,rs1581680,0.188  
4,80.476,rs1529039,0.186  
4,80.492,rs4149525,0.184  
4,80.550,rs1002082,0.185  
4,80.660,rs6855744,0.170  
4,80.691,rs11735430,0.166  
4,80.708,rs17652789,0.163  
4,80.774,rs1842469,0.187  
4,80.819,rs1480757,0.166  
4,80.827,rs1842472,0.166  
4,80.955,rs3852105,0.174  
4,80.981,rs4694075,0.153  
4,81.012,rs13146209,0.226  
4,81.243,rs10518081,0.159  
4,81.289,rs17688758,0.156  
4,81.306,rs1979537,0.155  
4,81.352,rs2579362,0.151  
4,81.364,rs13147721,0.150  
4,81.370,rs1377287,0.149  
4,81.429,rs16846318,0.146  
4,81.799,rs6858376,0.127  
4,81.905,rs7693843,0.122  
4,81.924,rs16846575,0.120  
4,81.930,rs1031453,0.121  
4,82.027,rs2219070,0.122  
4,82.256,rs7683624,0.113  
4,82.306,rs1474198,0.113  
4,82.341,rs1520497,0.113  
4,82.538,rs1369095,0.131  
4,82.539,rs9994557,0.131  
4,82.593,rs10019624,0.087  
4,82.595,rs10518102,0.086  
4,82.721,rs2086471,0.109  
4,82.737,rs986397,0.110  
4,82.755,rs4694523,0.113  
4,82.790,rs221594,0.099  
4,82.999,rs6853164,0.139  
4,83.154,rs1247583,0.118  
4,83.184,rs1358594,0.119  
4,83.271,rs12506479,0.120  
4,83.496,rs9998340,0.144  
4,83.643,rs3097412,0.101  
4,83.739,rs10938105,0.095  
4,83.808,rs422140,0.089  
4,83.908,rs9131,0.089  
4,84.028,rs477975,0.083  
4,84.080,rs1460016,0.081  
4,84.085,rs10518120,0.080  
4,84.131,rs10518121,0.082  
4,84.192,rs1460001,0.077  
4,84.207,rs10938119,0.076  
4,84.294,rs718607,0.082  
4,84.628,rs4596322,0.060  
4,84.639,rs4333264,0.060  
4,84.700,rs11930214,0.059  
4,84.724,rs7691380,0.059  
4,84.795,rs9307118,0.045  
4,84.865,rs1377028,0.033  
4,84.876,rs896577,0.014

4,84.936,rs16999967,0.029  
4,85.004,rs2060849,0.040  
4,85.128,rs4859933,0.034  
4,85.179,rs1365162,0.015  
4,85.242,rs4859952,0.007  
4,85.255,rs1493716,0.007  
4,85.255,rs17000469,0.007  
4,85.298,rs17000620,0.008  
4,85.300,rs9998529,0.008  
4,85.340,rs4859406,0.003  
4,85.347,rs6827302,0.002  
4,85.359,rs6847598,0.000  
4,85.366,rs1013588,0.001  
4,85.368,rs9998204,0.001  
4,85.378,rs6819442,0.002  
4,85.401,rs12504339,0.004  
4,85.415,rs17001357,0.005  
4,85.454,rs10006043,0.000  
4,85.462,rs17001970,0.003  
4,85.505,rs17002031,0.002  
4,85.515,rs6848817,0.000  
4,85.530,rs9996716,0.001  
4,85.554,rs12503111,0.003  
4,85.674,rs3733242,0.008  
4,85.688,rs4859461,0.005  
4,85.707,rs344108,0.005  
4,85.709,rs11097519,0.003  
4,85.709,rs17324961,0.003  
4,85.716,rs6853653,0.007  
4,85.740,rs17002240,0.010  
4,85.753,rs9307199,0.008  
4,85.756,rs11097539,0.009  
4,85.775,rs1994854,0.010  
4,85.776,rs1108255,0.010  
4,85.796,rs17261150,0.010  
4,85.811,rs6532676,0.010  
4,85.891,rs6847460,0.013  
4,85.907,rs11722689,0.020  
4,85.909,rs2645651,0.020  
4,85.914,rs10009464,0.022  
4,86.023,rs17002332,0.020  
4,86.061,rs4241599,0.020  
4,86.198,rs6849534,0.012  
4,86.264,rs6840204,0.013  
4,86.266,rs11943130,0.013  
4,86.288,rs1009141,0.013  
4,86.319,rs2865830,0.014  
4,86.347,rs736601,0.015  
4,86.499,rs17002597,0.023  
4,86.560,rs13138737,0.027  
4,86.611,rs1348299,0.032  
4,86.675,rs10518178,0.039  
4,86.794,rs355686,0.055  
4,86.797,rs355689,0.055  
4,86.816,rs171388,0.058  
4,86.848,rs17416271,0.062  
4,86.872,rs972755,0.066  
4,86.873,rs4859868,0.067  
4,87.059,rs9307306,0.049  
4,87.292,rs10019920,0.048  
4,87.407,rs1546318,0.043

4,87.437,rs7656678,0.041  
4,87.459,rs4859905,0.041  
4,87.548,rs17420118,0.055  
4,87.551,rs9284618,0.055  
4,87.556,rs10518195,0.056  
4,87.595,rs1017650,0.064  
4,87.625,rs345513,0.070  
4,87.646,rs6835769,0.069  
4,87.715,rs11940606,0.067  
4,87.721,rs931606,0.068  
4,87.806,rs1346145,0.083  
4,87.929,rs13150370,0.049  
4,87.932,rs1480713,0.048  
4,87.987,rs1154761,0.034  
4,88.025,rs1455308,0.044  
4,88.051,rs4975172,0.050  
4,88.089,rs4401473,0.048  
4,88.111,rs10004440,0.052  
4,88.148,rs3924829,0.057  
4,88.246,rs3109164,0.041  
4,88.249,rs7696440,0.040  
4,88.273,rs4455441,0.039  
4,88.303,rs7665764,0.027  
4,88.346,rs6857026,0.014  
4,88.353,rs4690123,0.012  
4,88.418,rs12504282,0.009  
4,88.442,rs4308327,0.009  
4,88.448,rs17004812,0.009  
4,88.450,rs4234850,0.005  
4,88.451,rs10518234,0.001  
4,88.495,rs3733336,-0.000  
4,88.508,rs6837827,-0.000  
4,88.767,rs12640833,0.000  
4,89.029,rs1052325,0.005  
4,89.033,rs6851598,0.006  
4,89.105,rs2685471,0.012  
4,89.210,rs3733553,0.028  
4,89.251,rs10516652,0.026  
4,89.267,rs1901568,0.025  
4,89.376,rs17005129,0.059  
4,89.387,rs6836031,0.077  
4,89.388,rs17005131,0.078  
4,89.493,rs1373637,0.107  
4,89.508,rs10033009,0.118  
4,89.559,rs7657174,0.133  
4,89.583,rs11099493,0.132  
4,89.620,rs6834681,0.148  
4,89.664,rs9307787,0.178  
4,89.859,rs4693011,0.223  
4,89.934,rs1599650,0.216  
4,89.979,rs11730183,0.209  
4,90.010,rs13109155,0.216  
4,90.183,rs897945,0.422  
4,90.328,rs6853728,0.362  
4,90.420,rs6846520,0.326  
4,90.442,rs2868763,0.322  
4,90.475,rs11940883,0.330  
4,90.529,rs2868760,0.331  
4,90.582,rs6854272,0.327  
4,90.647,rs4693596,0.298  
4,90.715,rs4693608,0.293

4,90.721,rs7670729,0.290  
4,90.769,rs6831788,0.251  
4,90.890,rs1494961,0.246  
4,90.909,rs17355027,0.249  
4,91.149,rs6818782,0.277  
4,91.164,rs1458642,0.277  
4,91.203,rs1547507,0.275  
4,91.220,rs17007149,0.271  
4,91.391,rs7679666,0.222  
4,91.505,rs17357139,0.204  
4,91.525,rs7696864,0.205  
4,91.543,rs1988722,0.178  
4,91.671,rs2017802,0.139  
4,91.690,rs1847819,0.136  
4,91.868,rs1343762,0.096  
4,92.018,rs4693676,0.058  
4,92.181,rs903521,0.045  
4,92.358,rs385194,0.051  
4,92.681,rs11726635,0.076  
4,92.772,rs4533765,0.070  
4,92.899,rs6822829,0.072  
4,93.062,rs168153,0.051  
4,93.075,rs1481775,0.064  
4,93.126,rs9307000,0.053  
4,93.141,rs6845803,0.050  
4,93.154,rs2869356,0.047  
4,93.299,rs2869362,0.017  
4,93.317,rs1026873,0.015  
4,93.536,rs6815441,0.004  
4,93.578,rs345367,0.001  
4,93.670,rs10032626,0.005  
4,93.705,rs7696763,0.005  
4,93.877,rs2575676,0.011  
4,93.877,rs7438872,0.011  
4,93.881,rs4640664,0.011  
4,94.036,rs12640395,0.007  
4,94.402,rs4608765,0.007  
4,94.435,rs10008238,0.006  
4,94.760,rs7660964,0.005  
4,94.765,rs6855627,0.005  
4,94.808,rs10032200,0.004  
4,94.809,rs340628,0.004  
4,94.995,rs4693811,0.000  
4,95.016,rs10022237,0.000  
4,95.095,rs6827817,-0.000  
4,95.176,rs10001608,-0.000  
4,95.226,rs6822632,-0.000  
4,95.250,rs3750025,-0.000  
4,95.250,rs2736982,-0.000  
4,95.264,rs6532013,-0.000  
4,95.350,rs7661141,0.000  
4,95.380,rs12650760,0.000  
4,95.444,rs1026663,0.001  
4,95.490,rs1477602,0.001  
4,95.499,rs17013569,0.001  
4,95.515,rs17013609,0.001  
4,95.543,rs2725236,0.001  
4,95.566,rs2467052,0.000  
4,95.651,rs4148152,0.003  
4,95.656,rs2622626,0.003  
4,95.733,rs1351441,0.016

4,95.738,rs11733577,0.017  
4,95.774,rs12641788,0.019  
4,95.786,rs893970,0.020  
4,95.791,rs2869929,0.020  
4,95.805,rs2869928,0.020  
4,95.902,rs4585264,0.015  
4,95.942,rs2717533,0.021  
4,96.317,rs3017925,0.058  
4,96.824,rs9991328,0.105  
4,96.875,rs10516821,0.112  
4,96.982,rs6828137,0.126  
4,97.199,rs678701,0.140  
4,97.200,rs679672,0.139  
4,97.202,rs7674810,0.096  
4,97.279,rs4693223,0.094  
4,97.376,rs6532149,0.072  
4,97.420,rs6830724,0.058  
4,97.424,rs4399946,0.057  
4,97.486,rs1019875,0.056  
4,97.524,rs1560488,0.059  
4,97.564,rs10015406,0.061  
4,97.633,rs17015445,0.070  
4,97.675,rs10516833,0.074  
4,98.004,rs772494,0.110  
4,98.178,rs6847082,0.100  
4,98.186,rs1495552,0.098  
4,98.257,rs4694010,0.076  
4,98.264,rs1495556,0.074  
4,98.275,rs17780881,0.075  
4,98.350,rs3857047,0.085  
4,98.392,rs2736990,0.080  
4,98.439,rs2301134,0.083  
4,98.544,rs11728457,0.070  
4,98.683,rs10013360,0.064  
4,98.724,rs17016737,0.057  
4,98.744,rs4693236,0.054  
4,98.756,rs7688033,0.053  
4,98.830,rs11097253,0.061  
4,98.849,rs2036153,0.061  
4,98.873,rs10003689,0.067  
4,98.892,rs17240838,0.071  
4,98.911,rs950127,0.076  
4,98.912,rs2132834,0.076  
4,98.917,rs1399409,0.076  
4,98.960,rs17017439,0.073  
4,99.046,rs7693519,0.066  
4,99.127,rs17017704,0.063  
4,99.149,rs11725878,0.062  
4,99.243,rs11721809,0.073  
4,99.357,rs6849036,0.093  
4,99.415,rs6819554,0.094  
4,99.418,rs10856881,0.094  
4,99.497,rs6817115,0.095  
4,99.552,rs1541365,0.096  
4,99.631,rs7671793,0.097  
4,99.651,rs1534559,0.102  
4,99.658,rs6815212,0.103  
4,99.707,rs1969531,0.115  
4,99.980,rs17284306,0.086  
4,99.999,rs1516708,0.084  
4,100.153,rs6532345,0.092

4,100.160,rs4128277,0.092  
4,100.162,rs1564958,0.091  
4,100.166,rs970694,0.090  
4,100.173,rs991345,0.087  
4,100.207,rs2199291,0.082  
4,100.222,rs17019342,0.073  
4,100.237,rs7659159,0.064  
4,100.240,rs4692973,0.078  
4,100.308,rs17019988,0.074  
4,100.539,rs1354296,0.053  
4,100.599,rs3796675,0.056  
4,100.668,rs6813949,0.057  
4,100.678,rs1433676,0.058  
4,100.721,rs6834311,0.066  
4,100.940,rs10516928,0.107  
4,100.966,rs6855368,0.094  
4,100.973,rs17020960,0.112  
4,101.070,rs735256,0.108  
4,101.087,rs726899,0.085  
4,101.120,rs7693338,0.064  
4,101.181,rs1898638,0.086  
4,101.431,rs7654919,0.065  
4,101.582,rs4359908,0.066  
4,101.631,rs2438140,0.065  
4,101.691,rs17021818,0.054  
4,101.743,rs1509620,0.051  
4,101.778,rs7680214,0.050  
4,101.791,rs6846079,0.043  
4,101.800,rs1553745,0.040  
4,101.945,rs1296143,0.086  
4,101.966,rs1444928,0.093  
4,101.978,rs6842938,0.094  
4,102.069,rs1560909,0.098  
4,102.078,rs3796434,0.097  
4,102.079,rs1369087,0.097  
4,102.094,rs3796442,0.097  
4,102.184,rs17352477,0.098  
4,102.191,rs6847919,0.098  
4,102.202,rs11097465,0.093  
4,102.242,rs1552225,0.082  
4,102.277,rs1384862,0.083  
4,102.282,rs6854948,0.068  
4,102.306,rs4380535,0.073  
4,102.312,rs13116794,0.071  
4,102.320,rs9995935,0.069  
4,102.324,rs265044,0.074  
4,102.349,rs2629833,0.107  
4,102.354,rs6532561,0.108  
4,102.360,rs10003330,0.109  
4,102.434,rs12499437,0.125  
4,102.528,rs7692486,0.137  
4,102.548,rs2196515,0.133  
4,102.626,rs2014345,0.127  
4,102.673,rs9997683,0.109  
4,102.721,rs6824429,0.110  
4,103.011,rs10033523,0.085  
4,103.111,rs12509878,0.070  
4,103.156,rs9993037,0.061  
4,103.162,rs9994928,0.060  
4,103.211,rs7659471,0.039  
4,103.371,rs10516422,0.049

4,103.400,rs6825634,0.051  
4,103.444,rs2865798,0.053  
4,103.485,rs11097573,0.053  
4,103.647,rs603215,0.057  
4,103.694,rs2004316,0.059  
4,103.702,rs4374629,0.059  
4,103.705,rs10009693,0.068  
4,103.706,rs10023791,0.072  
4,103.712,rs10004753,0.058  
4,103.715,rs6835899,0.047  
4,103.721,rs17027701,0.036  
4,103.726,rs1406311,0.028  
4,103.735,rs17027845,0.026  
4,103.741,rs10026666,0.025  
4,103.743,rs10489126,0.022  
4,103.760,rs1003174,0.013  
4,103.824,rs971169,0.014  
4,103.889,rs6532765,0.014  
4,103.918,rs2903158,0.014  
4,104.329,rs11939480,0.018  
4,104.394,rs7670154,0.019  
4,104.458,rs2602836,0.019  
4,104.527,rs7678936,0.020  
4,104.581,rs3857224,0.023  
4,104.626,rs2173199,0.025  
4,104.702,rs1159918,0.024  
4,104.703,rs1229982,0.024  
4,104.805,rs991316,0.011  
4,104.815,rs994771,0.010  
4,104.819,rs284792,0.012  
4,104.833,rs1154454,0.022  
4,104.907,rs2119888,0.015  
4,105.127,rs3816873,0.013  
4,105.215,rs7659550,0.010  
4,105.406,rs1108961,0.009  
4,105.412,rs7666347,0.010  
4,105.434,rs1426736,0.010  
4,105.481,rs6831238,0.012  
4,105.543,rs4699764,0.013  
4,105.555,rs9307241,0.013  
4,105.600,rs4699767,0.012  
4,105.997,rs6854962,0.004  
4,106.026,rs11097701,0.002  
4,106.027,rs6820091,0.002  
4,106.062,rs10026337,0.002  
4,106.070,rs4235450,0.002  
4,106.076,rs7659715,0.002  
4,106.077,rs10000959,0.002  
4,106.122,rs12647890,0.005  
4,106.127,rs10516462,0.005  
4,106.220,rs1392874,0.008  
4,106.314,rs7691456,0.005  
4,106.356,rs2089540,0.007  
4,106.449,rs4698838,0.011  
4,106.466,rs2645370,0.012  
4,106.472,rs12649554,0.013  
4,106.488,rs2851048,0.014  
4,106.533,rs3804357,0.019  
4,106.542,rs17030746,0.020  
4,106.622,rs978373,0.035  
4,106.629,rs17030994,0.036



4,106.685,rs17031191,0.043  
4,106.795,rs1426538,0.056  
4,106.808,rs10022442,0.055  
4,106.840,rs11930552,0.048  
4,106.853,rs12643950,0.049  
4,106.855,rs17031503,0.049  
4,106.860,rs7666463,0.051  
4,106.865,rs2866627,0.068  
4,106.897,rs13149930,0.073  
4,106.930,rs871061,0.073  
4,106.939,rs10003889,0.073  
4,106.947,rs7375516,0.073  
4,106.964,rs10028805,0.073  
4,106.979,rs17031708,0.074  
4,107.024,rs10014485,0.074  
4,107.178,rs190223,0.064  
4,107.212,rs13126885,0.061  
4,107.225,rs10014145,0.061  
4,107.314,rs1314336,0.054  
4,107.319,rs230489,0.054  
4,107.380,rs10489114,0.055  
4,107.392,rs230547,0.056  
4,107.444,rs17033210,0.053  
4,107.467,rs223482,0.053  
4,107.506,rs223366,0.053  
4,107.737,rs6828829,0.049  
4,107.846,rs2765,0.032  
4,107.868,rs3796974,0.027  
4,107.875,rs3796969,0.028  
4,107.938,rs233992,0.032  
4,107.961,rs2189223,0.032  
4,107.972,rs12502493,0.032  
4,108.046,rs3857207,0.035  
4,108.092,rs2866672,0.030  
4,108.101,rs2951111,0.028  
4,108.118,rs1406639,0.010  
4,108.297,rs10002598,0.008  
4,108.314,rs11933178,0.007  
4,109.140,rs4129288,0.002  
4,109.200,rs9998015,0.004  
4,109.275,rs902444,0.007  
4,109.355,rs4698931,0.006  
4,109.542,rs2726503,-0.000  
4,109.611,rs2074396,-0.002  
4,109.662,rs13327958,-0.000  
4,109.666,rs3756258,-0.000  
4,109.675,rs6813330,-0.000  
4,109.689,rs2593305,-0.000  
4,109.951,rs7677557,-0.006  
4,109.966,rs17036413,-0.007  
4,109.986,rs4367177,-0.007  
4,109.987,rs994370,-0.007  
4,109.996,rs10001483,-0.008  
4,110.322,rs10516535,-0.024  
4,110.424,rs1023792,-0.024  
4,110.460,rs13141555,-0.025  
4,110.571,rs12510474,-0.025  
4,110.588,rs11943338,-0.024  
4,110.647,rs433201,-0.018  
4,110.735,rs17584885,-0.010  
4,110.781,rs373586,-0.009

4,110.838,rs2029635,-0.007  
4,110.858,rs959482,-0.006  
4,110.877,rs931481,-0.010  
4,110.923,rs1023514,-0.009  
4,110.966,rs9684679,-0.008  
4,110.969,rs7680755,-0.008  
4,110.981,rs203217,-0.008  
4,111.025,rs10023658,-0.006  
4,111.113,rs932100,-0.004  
4,111.219,rs2189158,-0.004  
4,111.274,rs10008418,-0.007  
4,111.292,rs1389166,-0.008  
4,111.306,rs2087874,-0.008  
4,111.318,rs975219,-0.007  
4,111.335,rs17563597,-0.008  
4,111.456,rs10034874,-0.006  
4,111.495,rs898518,-0.006  
4,111.593,rs4956041,-0.009  
4,111.660,rs7665502,-0.017  
4,111.718,rs220612,-0.026  
4,111.769,rs12374269,-0.039  
4,111.782,rs219467,-0.043  
4,111.792,rs219472,-0.042  
4,111.832,rs219493,-0.019  
4,111.853,rs7667423,-0.018  
4,111.856,rs1452401,-0.017  
4,111.948,rs7688462,-0.024  
4,112.032,rs767062,-0.029  
4,112.105,rs2077246,-0.034  
4,112.141,rs2575657,-0.040  
4,112.142,rs12710996,-0.040  
4,112.158,rs1377210,-0.036  
4,112.196,rs1840063,-0.027  
4,112.306,rs7655700,-0.028  
4,112.384,rs3863122,-0.032  
4,112.408,rs10516554,-0.033  
4,112.418,rs1405160,-0.044  
4,112.440,rs7672923,-0.042  
4,112.468,rs1425353,-0.041  
4,112.476,rs876365,-0.040  
4,112.493,rs17039766,-0.038  
4,112.592,rs17223850,-0.024  
4,112.696,rs1297941,-0.027  
4,112.900,rs1396709,-0.033  
4,113.157,rs1800627,-0.041  
4,113.202,rs2346841,-0.032  
4,113.215,rs6822976,-0.030  
4,113.345,rs17040920,-0.028  
4,113.373,rs7689017,-0.028  
4,113.484,rs2298999,-0.033  
4,113.575,rs2040710,-0.030  
4,113.576,rs10033691,-0.030  
4,113.620,rs1125819,-0.023  
4,113.641,rs6533493,-0.019  
4,113.651,rs6835929,-0.018  
4,113.660,rs6813255,-0.017  
4,113.675,rs17612737,-0.015  
4,113.703,rs6533498,-0.011  
4,113.718,rs12499874,-0.010  
4,113.756,rs1482470,-0.007  
4,113.814,rs244055,-0.005

4,113.826,rs10011752,-0.004  
4,113.853,rs104888888,-0.003  
4,113.857,rs243970,-0.003  
4,113.949,rs17041821,-0.002  
4,113.973,rs939213,-0.002  
4,114.010,rs557785,-0.002  
4,114.153,rs2290105,-0.000  
4,114.227,rs1900829,-0.000  
4,114.344,rs2723296,-0.000  
4,114.373,rs2723313,-0.000  
4,114.485,rs13105878,-0.000  
4,114.500,rs4124159,-0.000  
4,114.504,rs3853444,-0.000  
4,114.543,rs6838973,0.000  
4,114.584,rs11098092,0.000  
4,114.621,rs511049,0.000  
4,114.727,rs7439813,0.000  
4,114.740,rs11726961,0.000  
4,114.992,rs297012,0.000  
4,115.302,rs1546053,-0.000  
4,115.414,rs7694111,-0.000  
4,115.423,rs17043035,-0.000  
4,115.439,rs6826534,-0.001  
4,115.469,rs7692766,-0.001  
4,115.516,rs11727195,-0.003  
4,115.680,rs2654735,-0.003  
4,115.696,rs6830890,-0.005  
4,115.714,rs980387,-0.004  
4,115.749,rs4833869,-0.009  
4,115.843,rs326902,-0.010  
4,116.052,rs6812046,-0.014  
4,116.299,rs9994166,-0.009  
4,116.393,rs17604169,-0.009  
4,116.409,rs17604670,-0.009  
4,116.418,rs17627616,-0.009  
4,116.456,rs6810537,-0.009  
4,116.460,rs17044418,-0.009  
4,116.463,rs2051776,-0.009  
4,116.507,rs4834269,-0.006  
4,116.528,rs2023824,-0.008  
4,116.588,rs2106988,-0.013  
4,116.719,rs1994376,-0.019  
4,116.826,rs17669218,-0.014  
4,116.897,rs1129065,-0.012  
4,117.089,rs10434020,-0.004  
4,117.200,rs4834308,-0.000  
4,117.212,rs12513140,-0.000  
4,117.223,rs7675254,-0.000  
4,117.341,rs6820742,-0.001  
4,117.391,rs1395114,-0.001  
4,117.409,rs313938,-0.002  
4,117.410,rs17045462,-0.002  
4,117.418,rs931838,-0.001  
4,117.450,rs884555,-0.001  
4,117.484,rs313958,-0.007  
4,117.521,rs313960,-0.016  
4,117.522,rs10003143,-0.017  
4,117.561,rs4627864,-0.019  
4,117.566,rs7697503,-0.020  
4,117.596,rs4834321,-0.023  
4,117.707,rs29401,-0.030

4,117.725,rs29327,-0.030  
4,117.781,rs11940206,-0.035  
4,117.862,rs6846326,-0.033  
4,117.885,rs7664824,-0.036  
4,117.887,rs10008952,-0.035  
4,117.924,rs7658972,-0.029  
4,118.001,rs2158196,-0.032  
4,118.233,rs1011973,-0.055  
4,118.334,rs10018022,-0.095  
4,118.342,rs10461151,-0.090  
4,118.353,rs7699538,-0.090  
4,118.357,rs7684832,-0.089  
4,118.377,rs7674158,-0.080  
4,118.390,rs10012647,-0.080  
4,118.392,rs766183,-0.080  
4,118.393,rs11098213,-0.080  
4,118.430,rs10020382,-0.102  
4,118.467,rs6851287,-0.105  
4,118.506,rs4549468,-0.108  
4,118.511,rs11098234,-0.108  
4,118.525,rs4458522,-0.100  
4,118.526,rs4989308,-0.099  
4,118.537,rs4834403,-0.096  
4,118.573,rs11722041,-0.095  
4,118.605,rs17678877,-0.094  
4,118.675,rs6533817,-0.103  
4,118.723,rs13120543,-0.119  
4,118.749,rs1036757,-0.114  
4,118.754,rs10516608,-0.116  
4,118.797,rs1383001,-0.139  
4,119.114,rs9884192,-0.125  
4,119.517,rs4566724,-0.136  
4,119.865,rs13112862,-0.142  
4,119.985,rs1549805,-0.144  
4,120.156,rs2045320,-0.128  
4,120.264,rs701779,-0.124  
4,120.333,rs1506732,-0.124  
4,120.499,rs10428494,-0.114  
4,120.537,rs1873103,-0.111  
4,120.650,rs6533974,-0.096  
4,120.756,rs10033111,-0.066  
4,120.855,rs12649613,-0.053  
4,120.919,rs1438217,-0.069  
4,120.941,rs2196712,-0.057  
4,121.040,rs10033190,-0.056  
4,121.041,rs6853512,-0.057  
4,121.083,rs13138792,-0.083  
4,121.095,rs7695817,-0.092  
4,121.117,rs4240307,-0.106  
4,121.128,rs11932518,-0.120  
4,121.139,rs6827477,-0.134  
4,121.142,rs12510650,-0.139  
4,121.163,rs6829877,-0.124  
4,121.193,rs1352573,-0.111  
4,121.211,rs2220497,-0.109  
4,121.290,rs4585377,-0.091  
4,121.401,rs9997637,-0.083  
4,121.415,rs10857057,-0.084  
4,121.501,rs10028343,-0.086  
4,121.519,rs631271,-0.089  
4,121.591,rs12504468,-0.096

4,121.647,rs2035600,-0.098  
4,121.805,rs11730732,-0.111  
4,121.827,rs11940444,-0.110  
4,121.856,rs1021377,-0.112  
4,121.870,rs9307465,-0.103  
4,121.888,rs1380158,-0.070  
4,121.892,rs1459056,-0.082  
4,121.895,rs6828669,-0.072  
4,121.903,rs10518313,-0.078  
4,121.911,rs1058450,-0.084  
4,121.942,rs2168987,-0.115  
4,121.943,rs11934309,-0.115  
4,122.126,rs6843229,-0.136  
4,122.290,rs1124166,-0.145  
4,122.299,rs1032818,-0.150  
4,122.349,rs1503535,-0.183  
4,122.364,rs17008785,-0.164  
4,122.405,rs972311,-0.171  
4,122.494,rs2715970,-0.166  
4,122.510,rs6850328,-0.165  
4,122.557,rs1808015,-0.163  
4,122.562,rs7667780,-0.162  
4,122.571,rs1685593,-0.162  
4,122.612,rs2390022,-0.163  
4,122.621,rs12511769,-0.170  
4,122.627,rs1532055,-0.174  
4,122.653,rs17051145,-0.191  
4,122.656,rs7693486,-0.193  
4,122.702,rs10518377,-0.214  
4,122.800,rs6534216,-0.194  
4,122.825,rs343202,-0.201  
4,122.877,rs6848268,-0.222  
4,122.911,rs6855437,-0.234  
4,122.974,rs11931196,-0.209  
4,122.981,rs882045,-0.207  
4,123.020,rs1397643,-0.202  
4,123.116,rs6835704,-0.216  
4,123.126,rs7671286,-0.217  
4,123.147,rs9997417,-0.219  
4,123.153,rs13128635,-0.220  
4,123.220,rs13110590,-0.215  
4,123.297,rs10010505,-0.251  
4,123.315,rs692157,-0.259  
4,123.323,rs13123059,-0.262  
4,123.362,rs1016802,-0.275  
4,123.393,rs982887,-0.282  
4,123.483,rs17449954,-0.253  
4,123.488,rs2306416,-0.252  
4,123.508,rs6838346,-0.217  
4,123.509,rs4833765,-0.216  
4,123.525,rs4833233,-0.197  
4,123.554,rs769240,-0.201  
4,123.616,rs950574,-0.210  
4,123.627,rs4001038,-0.213  
4,123.633,rs1358229,-0.215  
4,123.639,rs11098654,-0.211  
4,123.675,rs6840372,-0.201  
4,123.888,rs10857092,-0.182  
4,123.891,rs6848139,-0.181  
4,123.956,rs975405,-0.177  
4,123.970,rs4295278,-0.186

4,123.975,rs2137497,-0.189  
4,124.032,rs4833844,-0.233  
4,124.086,rs308435,-0.236  
4,124.087,rs308439,-0.236  
4,124.192,rs11731720,-0.210  
4,124.329,rs2589850,-0.265  
4,124.681,rs1425416,-0.277  
4,124.693,rs1834378,-0.278  
4,124.764,rs3113392,-0.295  
4,124.841,rs1519225,-0.323  
4,124.959,rs960925,-0.334  
4,124.967,rs11937163,-0.334  
4,125.060,rs1159819,-0.332  
4,125.145,rs312493,-0.332  
4,125.153,rs975107,-0.323  
4,125.160,rs4423888,-0.314  
4,125.165,rs491645,-0.337  
4,125.171,rs508410,-0.359  
4,125.174,rs7677431,-0.359  
4,125.183,rs12649449,-0.353  
4,125.187,rs1390079,-0.357  
4,125.266,rs1498016,-0.402  
4,125.305,rs10029225,-0.405  
4,125.348,rs9993168,-0.438  
4,125.374,rs1483599,-0.444  
4,125.388,rs17008912,-0.447  
4,125.421,rs1498040,-0.455  
4,125.424,rs1532492,-0.458  
4,125.535,rs7685639,-0.595  
4,125.538,rs17009332,-0.625  
4,125.574,rs2940781,-0.724  
4,125.589,rs2710572,-0.819  
4,125.605,rs17800919,-0.833  
4,125.608,rs17009497,-0.828  
4,125.615,rs2710560,-0.815  
4,125.629,rs1912043,-0.825  
4,125.663,rs9968420,-0.848  
4,125.702,rs1532883,-0.834  
4,125.710,rs1567049,-0.837  
4,125.734,rs6818629,-0.909  
4,125.742,rs6534494,-0.921  
4,125.748,rs4507376,-0.931  
4,125.753,rs1864363,-0.939  
4,125.771,rs6836731,-1.014  
4,125.858,rs7678929,-1.009  
4,125.873,rs6841080,-1.043  
4,125.883,rs4590050,-1.071  
4,125.922,rs2135365,-1.083  
4,125.963,rs11098847,-1.110  
4,126.082,rs2390992,-1.141  
4,126.155,rs1320244,-1.037  
4,126.168,rs6827629,-1.015  
4,126.189,rs7694254,-0.965  
4,126.212,rs12647099,-0.835  
4,126.222,rs1396529,-0.819  
4,126.234,rs1508986,-0.826  
4,126.265,rs6820022,-0.853  
4,126.325,rs7681514,-0.914  
4,126.425,rs4834142,-0.983  
4,126.759,rs13149390,-0.868  
4,126.781,rs724950,-0.860

4,126.820,rs2002543,-0.862  
4,126.905,rs2255457,-0.850  
4,127.077,rs11940642,-0.850  
4,127.320,rs4975181,-0.837  
4,127.437,rs6843137,-0.800  
4,127.454,rs7678706,-0.787  
4,127.458,rs12510203,-0.784  
4,127.488,rs1216405,-0.760  
4,127.512,rs1615523,-0.822  
4,127.516,rs17013522,-0.819  
4,127.559,rs13147397,-0.783  
4,127.576,rs6820206,-0.806  
4,127.578,rs17013657,-0.808  
4,127.591,rs11098986,-0.842  
4,127.625,rs4975270,-0.786  
4,127.790,rs1867951,-0.674  
4,127.844,rs7659741,-0.667  
4,127.864,rs6842443,-0.664  
4,127.881,rs6534714,-0.654  
4,127.917,rs4334769,-0.623  
4,127.965,rs10001834,-0.636  
4,128.023,rs600121,-0.636  
4,128.080,rs628527,-0.593  
4,128.091,rs1507787,-0.626  
4,128.173,rs7656732,-0.574  
4,128.175,rs6827503,-0.572  
4,128.187,rs13106127,-0.570  
4,128.285,rs4383635,-0.568  
4,128.291,rs10518570,-0.572  
4,128.549,rs2926412,-0.525  
4,128.691,rs1304183,-0.525  
4,128.762,rs931418,-0.519  
4,128.780,rs306364,-0.515  
4,128.899,rs717469,-0.475  
4,128.916,rs1478095,-0.469  
4,128.942,rs4864021,-0.463  
4,129.087,rs7692456,-0.422  
4,129.123,rs1353346,-0.405  
4,129.353,rs6811541,-0.310  
4,129.526,rs350951,-0.325  
4,129.725,rs2863673,-0.336  
4,129.858,rs17547161,-0.348  
4,130.026,rs348071,-0.356  
4,130.296,rs13147558,-0.376  
4,130.481,rs9999397,-0.376  
4,130.510,rs9996230,-0.384  
4,130.570,rs12501689,-0.385  
4,130.609,rs978335,-0.379  
4,130.782,rs7685353,-0.441  
4,130.816,rs1396009,-0.456  
4,130.876,rs976259,-0.481  
4,130.877,rs11936591,-0.482  
4,130.916,rs10213462,-0.500  
4,131.028,rs1389331,-0.553  
4,131.035,rs7679087,-0.555  
4,131.068,rs7375925,-0.558  
4,131.150,rs903092,-0.559  
4,131.340,rs7668810,-0.539  
4,131.372,rs10006443,-0.590  
4,131.551,rs1495000,-0.622  
4,131.599,rs6535038,-0.550

4,131.601,rs10519337,-0.546  
4,131.616,rs13144694,-0.558  
4,131.627,rs10034996,-0.531  
4,131.628,rs6856596,-0.528  
4,131.629,rs6813668,-0.525  
4,131.652,rs9998469,-0.495  
4,131.730,rs4527530,-0.397  
4,131.742,rs4565135,-0.385  
4,131.768,rs6856823,-0.365  
4,131.876,rs17637542,-0.380  
4,132.020,rs11099340,-0.434  
4,132.140,rs12503254,-0.418  
4,132.205,rs7666345,-0.409  
4,132.237,rs1504865,-0.367  
4,132.492,rs11733579,-0.331  
4,132.573,rs10013192,-0.297  
4,132.721,rs6857747,-0.276  
4,132.746,rs1558514,-0.320  
4,132.806,rs4864340,-0.348  
4,132.839,rs1476909,-0.350  
4,132.868,rs1860966,-0.356  
4,132.908,rs4315856,-0.367  
4,132.971,rs12509396,-0.383  
4,132.972,rs2406020,-0.383  
4,133.021,rs7658823,-0.384  
4,133.025,rs10519394,-0.388  
4,133.049,rs7658630,-0.405  
4,133.053,rs6832309,-0.400  
4,133.105,rs10016963,-0.375  
4,133.174,rs6842060,-0.294  
4,133.209,rs7685312,-0.300  
4,133.218,rs10007934,-0.304  
4,133.262,rs1400918,-0.321  
4,133.305,rs679959,-0.323  
4,133.332,rs515800,-0.308  
4,133.359,rs11735377,-0.256  
4,133.420,rs17049362,-0.261  
4,133.525,rs6816675,-0.297  
4,133.574,rs987360,-0.317  
4,133.624,rs6811274,-0.321  
4,133.668,rs5020420,-0.322  
4,133.698,rs2406747,-0.359  
4,133.709,rs7679076,-0.373  
4,133.718,rs2406756,-0.447  
4,133.814,rs4478233,-0.463  
4,133.853,rs6841316,-0.487  
4,133.855,rs4863773,-0.452  
4,133.912,rs3843891,-0.420  
4,134.083,rs6855385,-0.413  
4,134.208,rs7699316,-0.415  
4,134.263,rs11734678,-0.405  
4,134.396,rs7685529,-0.462  
4,134.416,rs11737641,-0.440  
4,134.422,rs7687419,-0.428  
4,134.424,rs11726463,-0.424  
4,134.429,rs1513765,-0.420  
4,134.456,rs6537323,-0.439  
4,134.461,rs7657780,-0.439  
4,134.486,rs7682572,-0.436  
4,134.531,rs6857347,-0.395  
4,134.547,rs4863797,-0.415



4,134.568,rs17050398,-0.441  
4,134.602,rs6818743,-0.473  
4,134.640,rs299113,-0.473  
4,134.826,rs6853222,-0.474  
4,134.955,rs12644755,-0.545  
4,135.004,rs1450453,-0.573  
4,135.155,rs1450454,-0.607  
4,135.232,rs1450449,-0.585  
4,135.273,rs12501270,-0.592  
4,135.284,rs7692637,-0.594  
4,135.369,rs7686170,-0.545  
4,135.375,rs11736543,-0.540  
4,135.387,rs1948898,-0.544  
4,135.419,rs4481278,-0.563  
4,135.440,rs7669416,-0.561  
4,135.486,rs4639023,-0.603  
4,135.494,rs6823019,-0.606  
4,135.500,rs4241923,-0.608  
4,135.562,rs6817458,-0.574  
4,135.734,rs11941589,-0.528  
4,135.750,rs6820313,-0.529  
4,135.780,rs2029288,-0.533  
4,136.034,rs1995103,-0.634  
4,136.060,rs706313,-0.645  
4,136.078,rs7689415,-0.652  
4,136.087,rs2602248,-0.655  
4,136.105,rs17050838,-0.688  
4,136.133,rs795602,-0.700  
4,136.146,rs8192049,-0.703  
4,136.148,rs795589,-0.703  
4,136.154,rs8192081,-0.691  
4,136.156,rs13124794,-0.687  
4,136.182,rs345983,-0.635  
4,136.214,rs4863683,-0.626  
4,136.228,rs6835277,-0.592  
4,136.229,rs6816973,-0.592  
4,136.231,rs932012,-0.593  
4,136.232,rs11100269,-0.592  
4,136.265,rs795992,-0.547  
4,136.304,rs2667364,-0.541  
4,136.322,rs795981,-0.522  
4,136.334,rs10029731,-0.505  
4,136.349,rs17005223,-0.495  
4,136.362,rs13127289,-0.531  
4,136.588,rs7656823,-0.512  
4,136.625,rs4863721,-0.513  
4,136.836,rs6851301,-0.515  
4,136.851,rs6828897,-0.515  
4,136.880,rs1402669,-0.497  
4,136.937,rs6817684,-0.547  
4,136.953,rs1546716,-0.568  
4,136.955,rs6820015,-0.569  
4,136.964,rs2139926,-0.569  
4,136.986,rs1464434,-0.600  
4,136.997,rs6822207,-0.615  
4,137.020,rs6536733,-0.616  
4,137.102,rs6816957,-0.609  
4,137.232,rs4362897,-0.591  
4,137.353,rs3104107,-0.602  
4,137.404,rs12509905,-0.604  
4,137.441,rs10002459,-0.606

4,137.454,rs17392415,-0.607  
4,137.507,rs10004266,-0.608  
4,137.526,rs1532013,-0.646  
4,137.571,rs7663798,-0.630  
4,137.575,rs11731148,-0.669  
4,137.577,rs1863307,-0.667  
4,137.579,rs874776,-0.681  
4,137.650,rs6814533,-0.717  
4,137.651,rs1425443,-0.670  
4,137.809,rs17425634,-0.621  
4,137.865,rs9991795,-0.576  
4,137.892,rs2042630,-0.560  
4,137.905,rs4956344,-0.591  
4,137.955,rs3851433,-0.578  
4,137.982,rs11100704,-0.574  
4,138.134,rs4956520,-0.537  
4,138.348,rs7672861,-0.525  
4,138.354,rs1012864,-0.525  
4,138.415,rs6840028,-0.528  
4,138.620,rs6825690,-0.468  
4,138.674,rs1561152,-0.460  
4,138.736,rs1057260,-0.416  
4,139.012,rs1519551,-0.418  
4,139.110,rs9990563,-0.417  
4,139.160,rs10018731,-0.411  
4,139.368,rs336355,-0.331  
4,139.540,rs2627804,-0.277  
4,139.625,rs2636638,-0.254  
4,139.629,rs2636670,-0.253  
4,139.686,rs4956319,-0.273  
4,139.712,rs1982965,-0.282  
4,139.807,rs1425531,-0.279  
4,139.829,rs975136,-0.310  
4,139.978,rs13133181,-0.330  
4,140.086,rs2575570,-0.297  
4,140.112,rs2306924,-0.291  
4,140.152,rs11100863,-0.288  
4,140.544,rs11736535,-0.221  
4,140.582,rs4835001,-0.190  
4,140.595,rs10006257,-0.195  
4,140.607,rs4373182,-0.220  
4,140.633,rs11931253,-0.220  
4,140.635,rs1489152,-0.215  
4,140.636,rs1596480,-0.187  
4,140.639,rs568752,-0.220  
4,140.666,rs2044276,-0.231  
4,140.695,rs1992598,-0.238  
4,140.722,rs13109195,-0.244  
4,140.814,rs11939979,-0.271  
4,140.875,rs4835014,-0.285  
4,140.904,rs7678910,-0.291  
4,140.930,rs9999510,-0.317  
4,140.941,rs3935131,-0.321  
4,140.968,rs11939704,-0.328  
4,141.015,rs17020623,-0.364  
4,141.029,rs988163,-0.371  
4,141.041,rs6814298,-0.385  
4,141.070,rs13119482,-0.421  
4,141.079,rs12332040,-0.429  
4,141.108,rs6537382,-0.458  
4,141.111,rs6537383,-0.462

4,141.135,rs7660035,-0.406  
4,141.181,rs13125215,-0.358  
4,141.207,rs6845844,-0.331  
4,141.236,rs10012073,-0.327  
4,141.428,rs1864372,-0.296  
4,141.768,rs6537420,-0.286  
4,141.916,rs1504355,-0.280  
4,141.974,rs7680105,-0.279  
4,142.635,rs1370301,-0.275  
4,142.704,rs1507500,-0.270  
4,143.285,rs1400558,-0.242  
4,143.405,rs5334,-0.213  
4,143.463,rs4110,-0.211  
4,143.480,rs10028794,-0.211  
4,143.497,rs4835438,-0.210  
4,143.564,rs17475359,-0.208  
4,143.911,rs11734619,-0.211  
4,143.974,rs4027115,-0.215  
4,144.051,rs17024235,-0.209  
4,144.107,rs10003349,-0.239  
4,144.191,rs2276932,-0.258  
4,144.196,rs7660368,-0.261  
4,144.238,rs1879829,-0.213  
4,144.241,rs1403143,-0.213  
4,144.260,rs10519942,-0.206  
4,144.272,rs6535594,-0.219  
4,144.273,rs17483979,-0.221  
4,144.277,rs3910044,-0.232  
4,144.294,rs10012553,-0.240  
4,144.313,rs3920217,-0.245  
4,144.336,rs1512327,-0.225  
4,144.345,rs4635799,-0.248  
4,144.374,rs2200984,-0.242  
4,144.384,rs17024762,-0.248  
4,144.421,rs7437928,-0.273  
4,144.427,rs2358469,-0.271  
4,144.436,rs4835530,-0.268  
4,144.468,rs517151,-0.256  
4,144.503,rs2520496,-0.260  
4,144.512,rs12374234,-0.269  
4,144.546,rs6839286,-0.299  
4,144.550,rs4259038,-0.301  
4,144.602,rs13435568,-0.300  
4,144.633,rs546978,-0.293  
4,144.740,rs6814124,-0.348  
4,144.771,rs17502597,-0.371  
4,144.829,rs10008520,-0.377  
4,144.851,rs4835604,-0.379  
4,144.852,rs1505469,-0.379  
4,144.855,rs17631619,-0.379  
4,144.885,rs4501203,-0.378  
4,144.887,rs4260523,-0.378  
4,144.896,rs6833562,-0.378  
4,144.898,rs7655571,-0.378  
4,144.915,rs4270569,-0.380  
4,144.987,rs1993656,-0.424  
4,145.080,rs1875899,-0.416  
4,145.089,rs1504786,-0.408  
4,145.191,rs2407167,-0.392  
4,145.192,rs10520104,-0.392  
4,145.202,rs10033020,-0.391

4,145.441,rs6535818,-0.364  
4,145.539,rs6835546,-0.339  
4,145.542,rs7657092,-0.339  
4,145.599,rs7658783,-0.332  
4,145.628,rs17360838,-0.331  
4,145.652,rs1364870,-0.330  
4,145.789,rs4466023,-0.358  
4,145.791,rs17361412,-0.359  
4,145.822,rs11737308,-0.348  
4,145.860,rs2406623,-0.328  
4,145.881,rs6838430,-0.323  
4,145.947,rs2714805,-0.293  
4,146.133,rs7695877,-0.243  
4,146.154,rs12642676,-0.227  
4,146.155,rs4696332,-0.226  
4,146.160,rs3935569,-0.179  
4,146.167,rs6814401,-0.188  
4,146.178,rs4447840,-0.173  
4,146.179,rs10010565,-0.172  
4,146.195,rs6857876,-0.154  
4,146.207,rs4513549,-0.174  
4,146.241,rs12500918,-0.160  
4,146.282,rs7699456,-0.165  
4,146.407,rs11737767,-0.184  
4,146.424,rs12512990,-0.178  
4,146.438,rs1878284,-0.192  
4,146.459,rs13138175,-0.182  
4,146.472,rs1516692,-0.175  
4,146.489,rs7683508,-0.200  
4,146.490,rs2090380,-0.201  
4,146.495,rs6858521,-0.207  
4,146.501,rs12641081,-0.221  
4,146.517,rs1516689,-0.268  
4,146.561,rs4323085,-0.289  
4,146.753,rs4696428,-0.358  
4,146.925,rs6817587,-0.396  
4,147.022,rs9997214,-0.445  
4,147.477,rs893805,-0.490  
4,147.801,rs6841435,-0.491  
4,148.084,rs13119846,-0.453  
4,148.205,rs10034657,-0.451  
4,148.214,rs6848033,-0.450  
4,148.307,rs1063151,-0.449  
4,148.318,rs6821970,-0.451  
4,148.344,rs2241839,-0.461  
4,148.477,rs1816702,-0.467  
4,148.601,rs17030417,-0.495  
4,148.726,rs11723258,-0.525  
4,148.805,rs954368,-0.525  
4,148.845,rs5009912,-0.529  
4,148.998,rs10024897,-0.546  
4,149.039,rs1878449,-0.553  
4,149.140,rs2897074,-0.617  
4,149.175,rs6858076,-0.616  
4,149.187,rs4696526,-0.616  
4,149.210,rs6835823,-0.615  
4,149.267,rs9307919,-0.623  
4,149.281,rs10005886,-0.629  
4,149.376,rs2014131,-0.666  
4,149.416,rs10028852,-0.695  
4,149.466,rs4432731,-0.677

4,149.701,rs12500437,-0.584  
4,149.736,rs2896868,-0.575  
4,149.742,rs1907155,-0.573  
4,149.773,rs7689945,-0.576  
4,149.802,rs1800792,-0.562  
4,149.807,rs13137121,-0.552  
4,149.844,rs727153,-0.470  
4,149.862,rs156550,-0.410  
4,149.882,rs17302908,-0.378  
4,149.890,rs1500387,-0.366  
4,149.902,rs17032207,-0.359  
4,149.927,rs4691555,-0.323  
4,149.941,rs6829756,-0.326  
4,149.967,rs17032433,-0.287  
4,149.995,rs6848512,-0.319  
4,150.036,rs2880414,-0.313  
4,150.054,rs13152353,-0.314  
4,150.219,rs908590,-0.316  
4,150.244,rs4691626,-0.316  
4,150.293,rs7442312,-0.327  
4,150.355,rs6850722,-0.350  
4,150.394,rs2625248,-0.367  
4,150.425,rs7692799,-0.360  
4,150.442,rs6841458,-0.352  
4,150.451,rs3806776,-0.348  
4,150.495,rs3796585,-0.300  
4,150.523,rs4691073,-0.269  
4,150.546,rs3796570,-0.253  
4,150.585,rs6536096,-0.248  
4,150.650,rs3775085,-0.260  
4,150.671,rs13128945,-0.264  
4,150.692,rs12510557,-0.268  
4,150.906,rs4437204,-0.294  
4,150.918,rs4558821,-0.297  
4,150.966,rs6419277,-0.303  
4,151.046,rs2340252,-0.347  
4,151.084,rs2879724,-0.381  
4,151.183,rs10030326,-0.388  
4,151.275,rs13147212,-0.437  
4,151.321,rs10517637,-0.454  
4,151.325,rs6818354,-0.455  
4,151.333,rs10517636,-0.496  
4,151.403,rs13435328,-0.490  
4,151.462,rs10517643,-0.491  
4,151.600,rs11943855,-0.504  
4,151.642,rs4691370,-0.505  
4,151.649,rs7684999,-0.505  
4,151.657,rs10030015,-0.505  
4,151.709,rs1469245,-0.514  
4,151.777,rs11100096,-0.470  
4,151.790,rs7655209,-0.462  
4,152.120,rs12507865,-0.480  
4,152.160,rs17036351,-0.441  
4,152.163,rs1434384,-0.441  
4,152.175,rs1036342,-0.443  
4,152.333,rs756334,-0.475  
4,152.370,rs6812217,-0.454  
4,152.373,rs7677854,-0.451  
4,152.456,rs17210208,-0.394  
4,152.469,rs721604,-0.385  
4,152.558,rs4569796,-0.384

4,152.670,rs13126054,-0.323  
4,152.694,rs12510198,-0.295  
4,152.717,rs1328925,-0.296  
4,152.812,rs6536309,-0.293  
4,153.261,rs7670689,-0.235  
4,153.280,rs714462,-0.233  
4,153.346,rs6849580,-0.230  
4,153.377,rs581849,-0.227  
4,153.683,rs2016061,-0.223  
4,153.744,rs6812880,-0.257  
4,153.761,rs11100229,-0.267  
4,153.847,rs2851798,-0.296  
4,153.898,rs2348414,-0.309  
4,153.916,rs9994725,-0.317  
4,153.950,rs1502752,-0.333  
4,153.969,rs6536489,-0.340  
4,154.003,rs17326199,-0.328  
4,154.037,rs1950167,-0.335  
4,154.070,rs953014,-0.336  
4,154.072,rs12374311,-0.334  
4,154.074,rs11939980,-0.333  
4,154.087,rs12503435,-0.313  
4,154.094,rs294526,-0.310  
4,154.098,rs1946867,-0.308  
4,154.114,rs4691655,-0.301  
4,154.145,rs13136944,-0.288  
4,154.171,rs1439395,-0.272  
4,154.183,rs13140082,-0.265  
4,154.301,rs4691703,-0.182  
4,154.314,rs17040262,-0.171  
4,154.327,rs4273418,-0.158  
4,154.374,rs12503470,-0.126  
4,154.398,rs4467511,-0.112  
4,154.522,rs4591550,-0.103  
4,154.735,rs6536577,-0.098  
4,154.919,rs1348530,-0.086  
4,154.978,rs13106146,-0.084  
4,155.018,rs1017543,-0.098  
4,155.049,rs12512282,-0.080  
4,155.058,rs6857927,-0.077  
4,155.198,rs4547755,-0.070  
4,155.269,rs7669737,-0.062  
4,155.383,rs6842030,-0.063  
4,155.537,rs4330312,-0.075  
4,155.545,rs10003025,-0.054  
4,155.619,rs2082669,-0.045  
4,155.620,rs1946656,-0.045  
4,155.654,rs359502,-0.038  
4,155.670,rs45426,-0.035  
4,155.691,rs4343679,-0.028  
4,155.698,rs13141291,-0.034  
4,155.703,rs4440177,-0.040  
4,155.709,rs7697133,-0.049  
4,155.721,rs921344,-0.044  
4,155.744,rs11931857,-0.046  
4,155.768,rs1450394,-0.054  
4,155.776,rs10021001,-0.047  
4,155.790,rs2045631,-0.037  
4,155.809,rs10428343,-0.036  
4,155.961,rs995302,-0.028  
4,156.018,rs10007144,-0.029

4,156.066,rs6847504,-0.025  
4,156.098,rs4263350,-0.022  
4,156.147,rs4132177,-0.008  
4,156.154,rs4301068,-0.007  
4,156.173,rs2320331,-0.004  
4,156.454,rs10001148,-0.003  
4,156.489,rs12644622,-0.005  
4,156.707,rs11945307,-0.008  
4,156.764,rs4057791,-0.008  
4,157.007,rs11931331,-0.006  
4,157.020,rs2320767,-0.005  
4,157.148,rs9993575,-0.013  
4,157.183,rs11100508,-0.009  
4,157.292,rs10030322,-0.013  
4,157.295,rs7686154,-0.013  
4,157.343,rs17044007,-0.011  
4,157.562,rs1038975,-0.006  
4,157.692,rs10517791,-0.001  
4,157.693,rs978402,-0.003  
4,157.760,rs6536757,0.000  
4,157.775,rs4267695,0.000  
4,158.008,rs2001227,0.001  
4,158.139,rs2321305,0.001  
4,158.278,rs4502640,0.001  
4,158.318,rs2321373,0.001  
4,158.453,rs7675835,0.001  
4,158.593,rs6835711,0.002  
4,158.850,rs6536824,0.006  
4,158.884,rs1110968,0.009  
4,158.922,rs1534578,0.005  
4,159.001,rs9991808,0.007  
4,159.129,rs17485743,0.019  
4,159.143,rs1113272,0.020  
4,159.163,rs12502646,0.022  
4,159.230,rs13113465,0.022  
4,159.278,rs4572830,0.015  
4,159.321,rs4234980,0.009  
4,159.323,rs10034282,0.009  
4,159.345,rs4593087,0.007  
4,159.424,rs7691785,0.002  
4,159.438,rs6846439,0.002  
4,159.446,rs6854993,0.002  
4,159.530,rs9762579,0.000  
4,159.676,rs12503351,-0.001  
4,159.693,rs6848914,-0.001  
4,159.706,rs4691148,-0.002  
4,159.775,rs4690801,-0.001  
4,159.788,rs2056255,-0.000  
4,159.813,rs1877536,-0.001  
4,159.982,rs12330937,-0.003  
4,160.171,rs1583645,-0.007  
4,160.189,rs2322291,-0.007  
4,160.319,rs11730342,-0.012  
4,160.361,rs2280322,-0.012  
4,160.384,rs2033765,-0.011  
4,160.458,rs7662154,-0.005  
4,160.522,rs1599115,-0.007  
4,160.579,rs2611209,-0.009  
4,160.598,rs2714807,-0.008  
4,160.600,rs17688688,-0.009  
4,160.621,rs4691215,-0.009

4,160.653,rs2611251,-0.011  
4,160.662,rs2714850,-0.011  
4,160.719,rs191644,-0.010  
4,160.774,rs11100620,-0.010  
4,160.849,rs1018139,-0.005  
4,160.853,rs7654070,-0.011  
4,160.891,rs1503294,-0.011  
4,160.932,rs17590344,-0.005  
4,160.976,rs1826956,-0.013  
4,161.002,rs6825989,-0.006  
4,161.022,rs13112070,-0.004  
4,161.158,rs410627,-0.014  
4,161.258,rs1492524,-0.025  
4,161.325,rs7439050,-0.030  
4,161.355,rs6536987,-0.034  
4,161.441,rs10009186,-0.048  
4,161.481,rs6817936,-0.053  
4,161.549,rs7672200,-0.066  
4,161.589,rs10020692,-0.078  
4,161.732,rs815212,-0.108  
4,161.881,rs10008779,-0.146  
4,161.964,rs2706845,-0.208  
4,161.974,rs2169736,-0.213  
4,161.992,rs17053332,-0.227  
4,162.004,rs1878685,-0.232  
4,162.023,rs1401014,-0.235  
4,162.048,rs12645719,-0.214  
4,162.063,rs6816694,-0.226  
4,162.070,rs11730375,-0.236  
4,162.313,rs1847688,-0.233  
4,162.341,rs7682960,-0.224  
4,162.358,rs2166186,-0.217  
4,162.380,rs13140875,-0.207  
4,162.428,rs304341,-0.205  
4,162.644,rs13133439,-0.237  
4,162.648,rs12509086,-0.238  
4,162.728,rs2319850,-0.245  
4,162.806,rs2634959,-0.252  
4,162.830,rs17650332,-0.248  
4,162.839,rs11132268,-0.246  
4,162.925,rs6857016,-0.242  
4,162.964,rs17650886,-0.242  
4,163.024,rs2723687,-0.232  
4,163.044,rs2723696,-0.231  
4,163.095,rs4314247,-0.168  
4,163.099,rs6846708,-0.169  
4,163.101,rs12649186,-0.167  
4,163.112,rs11933816,-0.165  
4,163.119,rs6832582,-0.161  
4,163.173,rs4635780,-0.167  
4,163.266,rs2247733,-0.181  
4,163.273,rs999958,-0.180  
4,163.374,rs973990,-0.218  
4,163.379,rs7688533,-0.217  
4,163.434,rs12643097,-0.208  
4,163.650,rs17054666,-0.176  
4,163.710,rs2706740,-0.168  
4,163.742,rs2660416,-0.168  
4,163.761,rs7698807,-0.167  
4,163.913,rs6815837,-0.163  
4,164.581,rs10520163,-0.133



4,164.666,rs13122912,-0.122  
4,164.735,rs11132816,-0.110  
4,164.769,rs1995305,-0.106  
4,164.812,rs10015829,-0.101  
4,164.832,rs4692758,-0.099  
4,164.917,rs12643868,-0.091  
4,165.206,rs2466990,-0.066  
4,165.270,rs11736939,-0.067  
4,165.293,rs12510576,-0.066  
4,165.347,rs3846272,-0.066  
4,165.499,rs1717072,-0.054  
4,165.538,rs4692824,-0.051  
4,165.551,rs2141473,-0.051  
4,165.610,rs2661079,-0.054  
4,165.824,rs2082317,-0.037  
4,165.931,rs11731647,-0.020  
4,165.981,rs7673719,-0.015  
4,166.154,rs3913195,-0.021  
4,166.192,rs4144862,-0.020  
4,166.246,rs11939052,-0.018  
4,166.304,rs9312509,-0.015  
4,166.371,rs1907084,-0.008  
4,166.671,rs4692643,-0.010  
4,166.805,rs983560,-0.023  
4,166.833,rs7654286,-0.024  
4,166.856,rs1394859,-0.025  
4,166.894,rs2131002,-0.026  
4,167.101,rs6843010,-0.024  
4,167.244,rs1484019,-0.016  
4,167.347,rs10019934,-0.011  
4,167.478,rs4695771,-0.010  
4,167.639,rs17058946,-0.009  
4,167.645,rs1824347,-0.009  
4,167.677,rs6810619,-0.012  
4,167.734,rs2653841,-0.012  
4,167.795,rs10020676,-0.012  
4,167.869,rs6856402,-0.009  
4,167.947,rs10213525,-0.009  
4,167.951,rs7670064,-0.009  
4,168.030,rs7665469,-0.004  
4,168.065,rs4696060,-0.001  
4,168.070,rs7655786,-0.001  
4,168.085,rs6813541,-0.000  
4,168.099,rs6553733,-0.000  
4,168.114,rs4358372,-0.001  
4,168.119,rs10033133,-0.001  
4,168.123,rs7700127,-0.000  
4,168.127,rs4695895,-0.000  
4,168.136,rs13107942,-0.001  
4,168.142,rs3889926,-0.004  
4,168.151,rs7657182,-0.005  
4,168.199,rs6812370,-0.019  
4,168.233,rs13118468,-0.031  
4,168.244,rs11133030,-0.036  
4,168.283,rs1992016,-0.040  
4,168.326,rs2196379,-0.039  
4,168.329,rs4695913,-0.039  
4,168.337,rs2164380,-0.038  
4,168.383,rs11942884,-0.032  
4,168.387,rs1467003,-0.032  
4,168.399,rs2174904,-0.032

4,168.614,rs4695918,-0.047  
4,168.849,rs4518223,-0.047  
4,168.996,rs8752,-0.042  
4,169.031,rs3775977,-0.042  
4,169.040,rs2555632,-0.042  
4,169.096,rs17295603,-0.040  
4,169.127,rs6837393,-0.039  
4,169.145,rs7657168,-0.039  
4,169.162,rs2612655,-0.042  
4,169.345,rs4425356,-0.059  
4,169.350,rs7686453,-0.060  
4,169.411,rs6553806,-0.057  
4,169.482,rs9312559,-0.051  
4,169.508,rs6827308,-0.048  
4,169.608,rs10021711,-0.037  
4,169.773,rs992363,-0.031  
4,169.853,rs4388065,-0.031  
4,170.016,rs1479377,-0.032  
4,170.021,rs13134743,-0.033  
4,170.025,rs10014039,-0.031  
4,170.027,rs13146658,-0.034  
4,170.030,rs17377586,-0.028  
4,170.031,rs10520296,-0.026  
4,170.052,rs6829020,-0.034  
4,170.060,rs11735559,-0.032  
4,170.067,rs3733398,-0.038  
4,170.073,rs17061779,-0.046  
4,170.075,rs12512924,-0.049  
4,170.082,rs722825,-0.054  
4,170.096,rs17061991,-0.048  
4,170.119,rs13140287,-0.039  
4,170.158,rs2132339,-0.037  
4,170.178,rs11133116,-0.037  
4,170.287,rs4306906,-0.031  
4,170.350,rs11133119,-0.028  
4,170.708,rs12499459,-0.018  
4,170.770,rs2333391,-0.016  
4,171.022,rs2291244,-0.015  
4,171.040,rs11731185,-0.016  
4,171.050,rs17672498,-0.019  
4,171.081,rs10013975,-0.028  
4,171.089,rs2046262,-0.030  
4,171.142,rs10520340,-0.043  
4,171.236,rs6553943,-0.061  
4,171.284,rs4690687,-0.064  
4,171.341,rs1454158,-0.050  
4,171.343,rs13144122,-0.049  
4,171.370,rs11932699,-0.081  
4,171.376,rs17631173,-0.094  
4,171.384,rs4690696,-0.097  
4,171.429,rs11133152,-0.106  
4,171.527,rs309732,-0.083  
4,171.659,rs309800,-0.070  
4,171.770,rs1017912,-0.047  
4,171.882,rs6826173,-0.063  
4,171.935,rs3775195,-0.070  
4,172.147,rs11734535,-0.097  
4,172.423,rs7662445,-0.098  
4,172.468,rs13110230,-0.092  
4,172.566,rs12512817,-0.079  
4,172.612,rs1866505,-0.077

4,172.619,rs6846031,-0.077  
4,172.639,rs2580069,-0.075  
4,172.678,rs966023,-0.069  
4,172.703,rs1992264,-0.059  
4,172.709,rs6821871,-0.081  
4,172.718,rs2118922,-0.070  
4,172.738,rs1567111,-0.060  
4,172.746,rs2046824,-0.056  
4,172.764,rs6850861,-0.050  
4,172.780,rs17064661,-0.041  
4,172.786,rs1983130,-0.039  
4,172.789,rs3805169,-0.035  
4,172.796,rs1055678,-0.027  
4,172.805,rs9312207,-0.015  
4,172.807,rs7671847,-0.007  
4,172.820,rs17064802,-0.006  
4,172.844,rs2279932,-0.004  
4,172.848,rs4690523,-0.008  
4,172.870,rs6823035,-0.006  
4,172.907,rs1882160,-0.004  
4,172.925,rs1920975,-0.003  
4,172.978,rs13102468,-0.004  
4,172.983,rs10019475,-0.004  
4,173.089,rs10017412,-0.004  
4,173.107,rs1377859,-0.004  
4,173.246,rs1676169,-0.016  
4,173.336,rs1462505,-0.022  
4,173.342,rs10520402,-0.022  
4,173.551,rs1458717,-0.012  
4,173.901,rs2063393,-0.003  
4,174.024,rs9991342,-0.000  
4,174.070,rs10520407,-0.000  
4,174.088,rs2702386,-0.000  
4,174.120,rs1903524,-0.000  
4,174.144,rs2250361,-0.000  
4,174.168,rs1903530,-0.000  
4,174.213,rs2702432,0.000  
4,174.305,rs2246528,-0.000  
4,174.382,rs2126270,-0.001  
4,174.441,rs1434035,-0.005  
4,174.454,rs17066485,-0.006  
4,174.457,rs17066498,-0.007  
4,174.474,rs12644125,-0.009  
4,174.481,rs2570725,-0.009  
4,174.621,rs4862035,-0.014  
4,174.729,rs418063,-0.020  
4,174.768,rs346119,-0.022  
4,175.122,rs1373044,-0.016  
4,175.267,rs930972,-0.014  
4,175.321,rs2167373,-0.018  
4,175.325,rs7698185,-0.018  
4,175.332,rs17066974,-0.019  
4,175.529,rs2028492,-0.017  
4,175.704,rs11934681,-0.023  
4,175.730,rs1457402,-0.023  
4,175.780,rs12641267,-0.023  
4,175.994,rs6826259,-0.020  
4,176.090,rs1378554,-0.017  
4,176.096,rs10002760,-0.017  
4,176.127,rs7688643,-0.019  
4,176.164,rs1455659,-0.019

4,176.188,rs17821431,-0.019  
4,176.271,rs767002,-0.018  
4,176.353,rs3849603,-0.008  
4,176.405,rs6854193,-0.010  
4,176.441,rs6836146,-0.010  
4,176.522,rs12500438,-0.011  
4,176.547,rs4861798,-0.014  
4,176.613,rs6852457,-0.024  
4,176.636,rs1380000,-0.029  
4,176.880,rs6552396,-0.031  
4,176.935,rs13435610,-0.034  
4,177.123,rs2125431,-0.044  
4,177.193,rs7674405,-0.045  
4,177.270,rs6552407,-0.034  
4,177.434,rs1665831,-0.037  
4,177.522,rs1979068,-0.049  
4,177.622,rs13121605,-0.061  
4,177.662,rs6836062,-0.065  
4,177.688,rs1868056,-0.064  
4,177.734,rs1447323,-0.050  
4,177.762,rs17069038,-0.050  
4,177.838,rs6834475,-0.039  
4,177.890,rs6847807,-0.030  
4,177.909,rs4861849,-0.030  
4,177.935,rs13141204,-0.029  
4,177.969,rs11934651,-0.034  
4,177.977,rs2309241,-0.036  
4,178.047,rs2677008,-0.059  
4,178.060,rs7678786,-0.062  
4,178.063,rs4597870,-0.063  
4,178.069,rs4241721,-0.064  
4,178.084,rs4552520,-0.071  
4,178.206,rs2546595,-0.089  
4,178.218,rs13134793,-0.091  
4,178.224,rs17069618,-0.092  
4,178.228,rs17180827,-0.092  
4,178.290,rs3095968,-0.102  
4,178.302,rs6851035,-0.103  
4,178.306,rs3095966,-0.104  
4,178.337,rs3113757,-0.117  
4,178.361,rs3113765,-0.129  
4,178.379,rs2446802,-0.131  
4,178.427,rs2613055,-0.134  
4,178.630,rs3101265,-0.122  
4,178.664,rs2250756,-0.123  
4,178.716,rs17203326,-0.134  
4,178.724,rs7657018,-0.136  
4,178.878,rs10015408,-0.145  
4,178.904,rs10866243,-0.145  
4,179.044,rs6817295,-0.115  
4,179.133,rs1357353,-0.109  
4,179.234,rs13121678,-0.127  
4,179.539,rs9312270,-0.129  
4,179.650,rs10020564,-0.125  
4,179.727,rs6824538,-0.122  
4,179.759,rs10520466,-0.120  
4,179.838,rs7688965,-0.124  
4,179.971,rs6845037,-0.110  
4,179.981,rs9999847,-0.107  
4,180.040,rs10520469,-0.098  
4,180.057,rs6836317,-0.096

4,180.219,rs6844811,-0.120  
4,180.227,rs7666029,-0.120  
4,180.263,rs11930570,-0.118  
4,180.307,rs7675654,-0.117  
4,180.318,rs11729166,-0.122  
4,180.345,rs2309472,-0.137  
4,180.357,rs4479746,-0.124  
4,180.394,rs1897994,-0.128  
4,180.396,rs4861475,-0.128  
4,180.465,rs12649512,-0.156  
4,180.471,rs4861975,-0.158  
4,180.491,rs1435497,-0.170  
4,180.508,rs1439276,-0.175  
4,180.519,rs12650613,-0.177  
4,180.527,rs11132072,-0.178  
4,180.533,rs4362864,-0.177  
4,180.546,rs1439283,-0.174  
4,180.634,rs7662677,-0.152  
4,180.641,rs10520501,-0.149  
4,180.652,rs6856771,-0.146  
4,180.663,rs13144599,-0.144  
4,180.748,rs6855392,-0.095  
4,180.771,rs17072249,-0.072  
4,180.773,rs12508055,-0.070  
4,180.780,rs7659598,-0.077  
4,180.810,rs6815030,-0.100  
4,180.817,rs4862004,-0.088  
4,180.825,rs10012329,-0.082  
4,180.827,rs7687804,-0.083  
4,180.833,rs7434383,-0.087  
4,180.858,rs7679999,-0.106  
4,180.864,rs11931121,-0.112  
4,180.885,rs965523,-0.133  
4,180.909,rs2138743,-0.142  
4,180.927,rs6824345,-0.140  
4,180.955,rs6813301,-0.130  
4,180.994,rs2063956,-0.109  
4,181.012,rs7676827,-0.099  
4,181.014,rs17288133,-0.098  
4,181.019,rs7697411,-0.095  
4,181.020,rs12503812,-0.095  
4,181.102,rs7693462,-0.054  
4,181.200,rs10520518,-0.051  
4,181.218,rs10026007,-0.052  
4,181.265,rs11132111,-0.071  
4,181.405,rs1114531,-0.051  
4,181.420,rs335068,-0.049  
4,181.572,rs896028,-0.026  
4,181.654,rs6815953,-0.020  
4,181.673,rs17307191,-0.019  
4,181.701,rs2726802,-0.018  
4,181.744,rs1031313,-0.017  
4,181.763,rs2726807,-0.016  
4,181.888,rs7687160,-0.012  
4,182.116,rs6552549,-0.004  
4,182.184,rs2675531,-0.003  
4,182.222,rs7669582,-0.003  
4,182.236,rs10520528,-0.003  
4,182.374,rs930878,-0.003  
4,182.395,rs1878221,-0.003  
4,182.442,rs11935545,-0.003

4,182.477,rs6823473,-0.004  
4,182.651,rs11736941,-0.006  
4,182.739,rs4861512,-0.007  
4,182.806,rs13145928,-0.007  
4,182.882,rs10520533,-0.007  
4,182.980,rs11731599,-0.006  
4,183.051,rs4428328,-0.006  
4,183.065,rs7674760,-0.005  
4,183.171,rs10520536,-0.004  
4,183.468,rs6850978,-0.008  
4,183.571,rs4535369,-0.006  
4,183.647,rs6845497,-0.006  
4,183.652,rs7694547,-0.005  
4,183.742,rs17073904,-0.004  
4,183.980,rs4862091,-0.002  
4,183.986,rs17074036,-0.003  
4,184.005,rs17074042,-0.004  
4,184.019,rs4467618,-0.006  
4,184.096,rs17074066,-0.004  
4,184.098,rs3805200,-0.004  
4,184.157,rs2309777,-0.006  
4,184.215,rs4862103,-0.006  
4,184.258,rs4241754,-0.005  
4,184.473,rs4861534,-0.017  
4,184.481,rs11132155,-0.017  
4,184.499,rs11132156,-0.015  
4,184.564,rs7277,-0.009  
4,184.736,rs13117933,-0.000  
4,185.408,rs6825466,-0.002  
4,185.478,rs11736402,-0.002  
4,185.561,rs4469120,-0.001  
4,185.615,rs7688139,-0.001  
4,185.649,rs1473070,-0.000  
4,185.680,rs11929772,-0.001  
4,185.728,rs4861543,-0.001  
4,185.734,rs9995832,0.000  
4,185.736,rs13151481,0.001  
4,185.750,rs17074703,0.000  
4,185.756,rs1511674,0.000  
4,185.765,rs7699622,0.003  
4,185.782,rs11725216,0.007  
4,185.858,rs11723316,0.017  
4,185.894,rs4440262,0.019  
4,185.907,rs4426827,0.020  
4,185.920,rs6811805,0.020  
4,185.931,rs11723412,0.021  
4,185.946,rs4394039,0.023  
4,185.953,rs7656979,0.018  
4,185.961,rs9884125,0.009  
4,185.970,rs13128324,0.003  
4,185.972,rs12504367,0.002  
4,186.014,rs6552695,0.004  
4,186.040,rs6838230,0.004  
4,186.254,rs4583804,0.001  
4,186.338,rs10000388,0.001  
4,186.526,rs4129955,0.001  
4,186.541,rs6845392,0.001  
4,186.569,rs13142457,0.001  
4,186.642,rs10019343,0.000  
4,186.670,rs7659026,0.000  
4,186.756,rs17075058,0.001

4,186.812,rs13106255,0.001  
4,186.895,rs13150058,0.003  
4,187.133,rs2309942,0.008  
4,187.142,rs6818342,0.008  
4,187.170,rs7696821,0.007  
4,187.186,rs6552722,0.007  
4,187.245,rs12502711,0.007  
4,187.411,rs7685679,0.003  
4,187.623,rs4862292,0.002  
4,188.085,rs4241790,0.000  
4,188.110,rs1921564,0.000  
4,188.153,rs1921560,-0.000  
4,188.268,rs4862330,-0.001  
4,188.352,rs6819977,-0.001  
4,188.414,rs938016,-0.001  
4,188.551,rs877378,-0.003  
4,188.676,rs2703737,-0.003  
4,188.791,rs999759,-0.003  
4,188.820,rs793899,-0.003  
4,188.961,rs11727845,-0.007  
4,189.026,rs6831978,-0.006  
4,189.062,rs6856910,-0.006  
4,189.101,rs11132242,-0.010  
4,189.130,rs2241500,-0.006  
4,189.139,rs7685555,-0.002  
4,189.142,rs3775556,-0.002  
4,189.162,rs7677486,-0.003  
4,189.219,rs3756094,-0.002  
4,189.231,rs12504466,-0.004  
4,189.254,rs13116389,-0.005  
4,189.268,rs793794,-0.003  
4,189.297,rs3775574,-0.001  
4,189.378,rs13111483,-0.000  
4,189.587,rs1976955,0.000  
4,189.677,rs2178094,-0.001  
4,190.285,rs7699623,0.001  
4,190.336,rs755535,0.002  
4,190.569,rs6552828,0.007  
4,190.620,rs9997745,0.008  
4,190.759,rs4862432,0.008  
4,190.797,rs4862439,0.012  
4,190.840,rs7670324,0.019  
4,190.880,rs13434707,0.025  
4,190.891,rs11723505,0.027  
4,190.917,rs6835984,0.031  
4,190.991,rs6552840,0.031  
4,191.184,rs6822322,0.030  
4,191.224,rs4355430,0.014  
4,191.260,rs9993348,0.015  
4,191.314,rs4862478,0.017  
4,191.387,rs11132270,0.016  
4,191.405,rs16813,0.015  
4,191.461,rs6854448,0.009  
4,191.597,rs4415003,0.005  
4,191.783,rs2310156,0.004  
4,191.799,rs12512707,0.008  
4,191.820,rs6552864,0.008  
4,191.847,rs7661225,0.008  
4,191.879,rs6818704,0.008  
4,191.977,rs2046535,0.007  
4,192.303,rs3112911,0.007

4,192.463,rs7672656,0.004  
4,192.730,rs1031128,0.000  
4,192.810,rs12649063,-0.002  
4,192.838,rs13102445,-0.002  
4,192.865,rs6823490,-0.001  
4,192.875,rs6854874,-0.001  
4,192.905,rs9312336,-0.003  
4,192.911,rs12502295,-0.003  
4,192.927,rs13119106,-0.002  
4,192.947,rs3816807,-0.003  
4,192.966,rs7663196,-0.005  
4,192.967,rs6821894,-0.005  
4,192.983,rs4241809,-0.007  
4,192.996,rs9312338,-0.013  
4,193.001,rs4599460,-0.014  
4,193.015,rs4862562,-0.008  
4,193.024,rs11132333,-0.005  
4,193.046,rs1547909,-0.004  
4,193.110,rs7667992,0.000  
4,193.177,rs4487396,0.001  
4,193.187,rs2310357,0.001  
4,193.243,rs6858040,0.001  
4,193.273,rs9998709,0.001  
4,193.309,rs11132350,0.000  
4,193.364,rs7673778,-0.000  
4,193.406,rs6814512,0.000  
4,193.421,rs13111004,0.000  
4,193.500,rs6552928,0.000  
4,193.621,rs10002028,0.000  
4,193.646,rs13132627,0.000  
4,193.814,rs7680928,-0.000  
4,193.991,rs959621,-0.000  
4,194.003,rs1454746,0.000  
4,194.043,rs830829,-0.001  
4,194.084,rs4862611,-0.001  
4,194.129,rs830838,-0.005  
4,194.201,rs2008461,-0.004  
4,194.261,rs1401573,-0.004  
4,194.268,rs6815342,-0.004  
4,194.389,rs7691384,-0.004  
4,194.436,rs956239,-0.006  
4,194.553,rs4608848,-0.009  
4,194.701,rs1706145,-0.011  
4,194.769,rs7660462,-0.011  
4,194.941,rs2036912,-0.013  
4,195.161,rs1912826,-0.009  
4,195.380,rs4253418,-0.021  
4,195.447,rs13145616,-0.026  
4,195.499,rs1008728,-0.030  
4,195.530,rs12331264,-0.032  
4,195.550,rs6552971,-0.040  
4,195.556,rs7687352,-0.042  
4,195.759,rs1901314,-0.057  
4,196.110,rs9999651,-0.078  
4,196.207,rs10003777,-0.064  
4,196.269,rs6830267,-0.078  
4,196.305,rs11723176,-0.078  
4,196.418,rs7699670,-0.093  
4,196.543,rs13140444,-0.111  
4,196.661,rs11930659,-0.102  
4,196.802,rs2637777,-0.103



4,196.865,rs3733406,-0.099  
4,197.068,rs167853,-0.088  
4,197.069,rs2130910,-0.088  
4,197.079,rs2130909,-0.089  
4,197.258,rs3733413,-0.084  
4,197.474,rs925642,-0.082  
4,197.552,rs6833702,-0.053  
4,197.647,rs12640954,-0.038  
4,198.078,rs4862742,-0.059  
4,198.095,rs578135,-0.059  
4,198.227,rs7682123,-0.062  
4,198.240,rs999319,-0.062  
4,198.266,rs754548,-0.062  
4,198.730,rs6835306,-0.071  
4,198.742,rs6814129,-0.071  
4,198.787,rs7441526,-0.076  
4,198.794,rs4862758,-0.076  
4,198.918,rs6818214,-0.099  
4,198.969,rs2129654,-0.103  
4,199.145,rs4611977,-0.120  
4,199.471,rs1565106,-0.120  
4,199.693,rs10461324,-0.118  
4,199.810,rs4308418,-0.120  
4,199.834,rs6553055,-0.120  
4,200.044,rs1156741,-0.125  
4,200.732,rs12641785,-0.148  
4,201.165,rs4861749,-0.174  
4,201.534,rs4862815,-0.238  
4,201.538,rs1532857,-0.238  
4,201.583,rs7677258,-0.241  
4,202.562,rs9992060,-0.166  
4,202.565,rs7683009,-0.151  
4,202.566,rs10006997,-0.153  
4,202.590,rs4315850,-0.207  
4,202.598,rs10018412,-0.246  
4,202.604,rs12644789,-0.261  
4,202.608,rs7439650,-0.259  
4,202.612,rs4862848,-0.242  
4,202.614,rs6840208,-0.240  
4,202.615,rs2172340,-0.239  
4,202.616,rs2131287,-0.256  
4,202.619,rs2889360,-0.249  
4,202.624,rs1540663,-0.210  
4,202.634,rs9684216,-0.225  
4,202.640,rs13131525,-0.204  
4,202.648,rs12501503,-0.159  
4,202.652,rs4492063,-0.148  
4,202.656,rs6813871,-0.147  
4,202.658,rs3924963,-0.152  
4,202.663,rs4476671,-0.193  
4,202.667,rs7375584,-0.206  
4,202.674,rs6830572,-0.249  
4,202.678,rs12639689,-0.265  
4,202.682,rs4863305,-0.280  
4,202.747,rs2292434,-0.376  
4,202.761,rs425974,-0.379  
4,202.882,rs931885,-0.384  
4,202.960,rs10023035,-0.372  
4,202.999,rs7667826,-0.365  
4,203.042,rs4863054,-0.371  
4,203.072,rs4863354,-0.373

4,203.078,rs2377343,-0.380  
4,203.080,rs12501064,-0.383  
4,203.114,rs6817256,-0.417  
4,203.207,rs899273,-0.443  
4,203.376,rs7685306,-0.442  
4,203.547,rs1073671,-0.419  
4,203.689,rs2218692,-0.421  
4,203.803,rs7677253,-0.400  
4,203.871,rs11937288,-0.386  
4,203.975,rs11132593,-0.369  
4,204.029,rs10018868,-0.386  
4,204.080,rs13126066,-0.403  
4,204.110,rs2029952,-0.414  
4,204.206,rs7700119,-0.432  
4,204.226,rs7690324,-0.499  
4,204.249,rs11737011,-0.537  
4,204.261,rs13106777,-0.527  
4,204.267,rs6848521,-0.518  
4,204.301,rs11932479,-0.529  
4,204.377,rs10006955,-0.513  
4,204.416,rs10032784,-0.494  
4,204.466,rs6553315,-0.480  
4,204.482,rs872030,-0.477  
4,204.631,rs1551137,-0.440  
4,205.020,rs7684487,-0.486  
4,205.050,rs1996801,-0.485  
4,205.070,rs11132766,-0.522  
4,205.162,rs13119686,-0.523  
4,205.247,rs17080259,-0.524  
5,0.023,rs341260,0.158  
5,0.053,rs341267,0.158  
5,0.126,rs6874933,0.175  
5,0.357,rs2671898,0.155  
5,0.371,rs2672777,0.113  
5,0.458,rs6864158,0.081  
5,0.536,rs4541696,0.060  
5,0.610,rs12518227,0.064  
5,0.630,rs3828569,0.064  
5,0.819,rs7702532,0.063  
5,0.961,rs4975533,0.058  
5,0.966,rs326046,0.057  
5,0.984,rs4078802,0.058  
5,1.016,rs4975526,0.059  
5,1.028,rs3810854,0.059  
5,1.092,rs4580814,0.064  
5,1.111,rs4594899,0.070  
5,1.138,rs7726442,0.081  
5,1.171,rs4975596,0.084  
5,1.209,rs7727745,0.092  
5,1.331,rs4073918,0.122  
5,1.381,rs2736122,0.132  
5,1.490,rs2736100,0.152  
5,1.780,rs27061,0.185  
5,1.811,rs2963265,0.165  
5,1.885,rs12516758,0.179  
5,1.903,rs40184,0.183  
5,1.969,rs27048,0.186  
5,2.046,rs460000,0.173  
5,2.067,rs403636,0.173  
5,2.086,rs6350,0.175  
5,2.202,rs27056,0.187

5,2.266,rs1010626,0.186  
5,2.298,rs36987,0.188  
5,2.367,rs2963279,0.200  
5,2.374,rs4406174,0.200  
5,2.439,rs4551123,0.178  
5,2.501,rs2962066,0.145  
5,2.550,rs4975556,0.128  
5,2.951,rs931709,0.122  
5,3.006,rs10512656,0.118  
5,3.263,rs2242411,0.116  
5,3.304,rs1107059,0.127  
5,3.337,rs2172532,0.117  
5,3.432,rs2276986,0.098  
5,3.519,rs6864000,0.082  
5,3.622,rs12188301,0.071  
5,3.669,rs4975744,0.068  
5,3.748,rs2232376,0.063  
5,3.805,rs12653946,0.056  
5,3.855,rs6894487,0.066  
5,4.008,rs972973,0.055  
5,4.022,rs10055976,0.054  
5,4.243,rs4975721,0.052  
5,4.324,rs4975807,0.052  
5,4.415,rs6555046,0.055  
5,4.486,rs10475134,0.058  
5,4.519,rs4566837,0.055  
5,4.534,rs10063808,0.060  
5,4.594,rs4975819,0.078  
5,4.632,rs11950809,0.064  
5,4.648,rs7446517,0.065  
5,4.671,rs4075798,0.093  
5,4.707,rs6860349,0.130  
5,4.719,rs6555064,0.143  
5,4.724,rs7719723,0.147  
5,4.771,rs7735656,0.158  
5,4.826,rs10076206,0.168  
5,4.864,rs4866475,0.170  
5,4.948,rs16903629,0.167  
5,4.968,rs12187097,0.165  
5,5.016,rs10041522,0.163  
5,5.051,rs10512689,0.153  
5,5.159,rs10068115,0.123  
5,5.166,rs1458513,0.123  
5,5.307,rs2652147,0.120  
5,5.361,rs7718226,0.124  
5,5.371,rs316566,0.123  
5,5.406,rs7445525,0.120  
5,5.540,rs10036054,0.110  
5,5.591,rs6869394,0.131  
5,5.622,rs7715102,0.133  
5,5.692,rs160730,0.142  
5,5.788,rs315914,0.157  
5,6.156,rs10462760,0.220  
5,6.227,rs6875477,0.231  
5,6.349,rs445296,0.213  
5,6.478,rs569244,0.226  
5,6.528,rs2004187,0.234  
5,6.584,rs406353,0.222  
5,6.615,rs6555117,0.191  
5,6.737,rs950864,0.153  
5,6.772,rs7721778,0.145

5,6.846,rs4866662,0.135  
5,6.883,rs10474751,0.123  
5,6.922,rs2962580,0.111  
5,7.002,rs924213,0.160  
5,7.038,rs11432,0.174  
5,7.115,rs6883371,0.178  
5,7.201,rs1908976,0.194  
5,7.308,rs1540708,0.221  
5,7.327,rs10038374,0.226  
5,7.405,rs7442964,0.256  
5,7.436,rs559379,0.249  
5,7.503,rs1024029,0.237  
5,7.657,rs2934555,0.193  
5,7.703,rs10061701,0.194  
5,7.708,rs16874371,0.195  
5,7.800,rs2934528,0.197  
5,7.899,rs12657444,0.168  
5,7.938,rs6861422,0.165  
5,7.997,rs7712222,0.118  
5,8.016,rs2009378,0.102  
5,8.043,rs2922992,0.112  
5,8.095,rs2404567,0.117  
5,8.173,rs10068728,0.131  
5,8.226,rs167528,0.121  
5,8.299,rs464918,0.141  
5,8.372,rs314008,0.116  
5,8.390,rs317000,0.110  
5,8.496,rs903397,0.093  
5,8.592,rs457099,0.087  
5,8.606,rs251817,0.085  
5,8.720,rs875853,0.073  
5,8.729,rs1310088,0.072  
5,8.740,rs1215667,0.072  
5,8.743,rs396319,0.072  
5,8.818,rs1691018,0.066  
5,8.866,rs1441533,0.066  
5,8.916,rs4476727,0.065  
5,8.982,rs6896919,0.060  
5,8.988,rs12188329,0.059  
5,9.070,rs4521479,0.051  
5,9.123,rs251433,0.038  
5,9.134,rs32689,0.040  
5,9.202,rs6555203,0.050  
5,9.456,rs698144,0.033  
5,9.560,rs4866585,0.049  
5,9.573,rs828316,0.049  
5,9.576,rs10042985,0.049  
5,9.656,rs6555208,0.062  
5,9.777,rs1502644,0.085  
5,9.808,rs6892937,0.100  
5,9.881,rs2134400,0.124  
5,9.903,rs1566691,0.129  
5,9.906,rs13174381,0.129  
5,9.979,rs905350,0.136  
5,9.990,rs2134404,0.135  
5,10.548,rs540937,0.116  
5,10.761,rs6860112,0.086  
5,10.799,rs10076711,0.083  
5,10.850,rs11953297,0.079  
5,10.917,rs959937,0.090  
5,10.922,rs7706780,0.092

5,10.952,rs265180,0.097  
5,10.974,rs11739066,0.123  
5,11.159,rs13185799,0.082  
5,11.172,rs261125,0.080  
5,11.184,rs261130,0.066  
5,11.208,rs1080648,0.045  
5,11.238,rs4702677,0.017  
5,11.271,rs10076204,0.011  
5,11.294,rs6861699,0.011  
5,11.355,rs9313082,0.002  
5,11.437,rs1450822,0.010  
5,11.538,rs16873639,0.010  
5,11.575,rs293067,0.003  
5,11.586,rs6894400,0.002  
5,11.627,rs6887582,0.000  
5,11.633,rs293102,0.000  
5,11.644,rs7713961,0.000  
5,11.655,rs2077369,0.001  
5,11.660,rs418752,0.001  
5,11.677,rs1346575,0.001  
5,11.691,rs2895497,0.001  
5,11.710,rs4568336,0.001  
5,11.781,rs2047728,0.002  
5,11.821,rs10058793,0.002  
5,11.885,rs4235550,0.002  
5,11.996,rs10512749,0.003  
5,12.079,rs10051514,0.005  
5,12.144,rs10475277,0.003  
5,12.152,rs501031,0.003  
5,12.170,rs6868240,0.003  
5,12.227,rs16874489,0.005  
5,12.321,rs465871,0.004  
5,12.345,rs446464,0.005  
5,12.421,rs272162,0.006  
5,12.653,rs861512,0.006  
5,12.682,rs814776,0.007  
5,12.830,rs270178,0.010  
5,12.839,rs997427,0.010  
5,12.883,rs4702234,0.010  
5,12.970,rs17762877,0.010  
5,13.056,rs4702248,0.010  
5,13.112,rs2913633,0.014  
5,13.147,rs1834928,0.021  
5,13.182,rs2964411,0.019  
5,13.211,rs2964399,0.017  
5,13.326,rs4076657,0.021  
5,13.404,rs4702257,0.022  
5,13.436,rs2964478,0.021  
5,13.469,rs7725935,0.020  
5,13.543,rs2964149,0.018  
5,13.747,rs2964137,0.013  
5,13.770,rs2964132,0.012  
5,13.840,rs2399696,0.011  
5,14.011,rs3806874,0.005  
5,14.179,rs2619855,0.001  
5,14.399,rs252838,-0.003  
5,14.479,rs246760,-0.007  
5,14.499,rs153264,-0.008  
5,14.548,rs2913315,-0.012  
5,14.644,rs7703207,-0.009  
5,14.645,rs153269,-0.009

5,14.846,rs256360,-0.009  
5,15.128,rs406792,-0.006  
5,15.316,rs42286,-0.004  
5,15.396,rs2617562,0.001  
5,15.424,rs1864117,0.004  
5,15.446,rs16876357,0.004  
5,15.558,rs2617549,0.005  
5,15.570,rs16876434,0.005  
5,15.578,rs17746450,0.005  
5,15.714,rs10454950,0.011  
5,15.778,rs657865,0.012  
5,15.821,rs11948091,0.011  
5,15.904,rs306254,0.009  
5,16.268,rs307176,0.008  
5,16.435,rs6861277,0.013  
5,16.695,rs2937791,0.023  
5,16.774,rs2964755,0.026  
5,16.816,rs1870082,0.030  
5,16.834,rs1457120,0.021  
5,16.852,rs2914757,0.019  
5,16.869,rs4702326,0.016  
5,16.903,rs1457122,0.011  
5,16.947,rs2914749,0.002  
5,16.948,rs2925703,0.002  
5,17.055,rs7714333,-0.000  
5,17.078,rs12520404,-0.001  
5,17.085,rs1428986,-0.001  
5,17.093,rs6872084,-0.001  
5,17.321,rs12654055,-0.001  
5,17.424,rs4701734,-0.001  
5,17.486,rs272456,-0.002  
5,17.568,rs10057455,-0.004  
5,17.572,rs538938,-0.004  
5,17.649,rs474953,-0.005  
5,17.657,rs567431,-0.006  
5,17.711,rs7735244,-0.011  
5,17.793,rs12522757,-0.021  
5,17.919,rs1651071,-0.026  
5,17.933,rs10512874,-0.026  
5,17.990,rs4701750,-0.024  
5,18.242,rs10044678,-0.018  
5,18.244,rs1566039,-0.012  
5,18.261,rs275486,-0.012  
5,18.268,rs275480,-0.012  
5,18.330,rs275510,-0.010  
5,18.343,rs12513764,-0.011  
5,18.450,rs12656353,-0.014  
5,18.512,rs2397718,-0.017  
5,18.537,rs1845852,-0.015  
5,18.701,rs11134199,-0.013  
5,18.753,rs7711636,-0.011  
5,18.920,rs903848,-0.011  
5,18.944,rs16878407,-0.012  
5,18.978,rs7709479,-0.014  
5,19.026,rs7727403,-0.017  
5,19.059,rs10051593,-0.011  
5,19.179,rs4235576,-0.011  
5,19.210,rs9986256,-0.012  
5,19.358,rs4132671,-0.018  
5,19.421,rs1505080,-0.021  
5,19.593,rs6872422,-0.025

5,19.636,rs7733194,-0.028  
5,19.649,rs13175786,-0.028  
5,19.720,rs252546,-0.031  
5,19.776,rs10038196,-0.037  
5,19.798,rs1392481,-0.039  
5,19.837,rs6875695,-0.044  
5,20.021,rs12716194,-0.039  
5,20.244,rs989634,-0.036  
5,20.257,rs10059539,-0.036  
5,20.313,rs326205,-0.037  
5,20.318,rs4702506,-0.036  
5,20.369,rs7730643,-0.027  
5,20.370,rs326121,-0.027  
5,20.378,rs6555501,-0.036  
5,20.452,rs162271,-0.038  
5,20.535,rs1471621,-0.039  
5,20.563,rs331413,-0.031  
5,20.584,rs9313211,-0.026  
5,20.629,rs11134268,-0.025  
5,20.810,rs6886541,-0.027  
5,20.822,rs11744506,-0.037  
5,20.949,rs1506105,-0.054  
5,21.015,rs336164,-0.043  
5,21.107,rs1823809,-0.027  
5,21.201,rs6875114,-0.026  
5,21.277,rs12514960,-0.025  
5,21.420,rs12109465,-0.020  
5,21.458,rs2136170,-0.017  
5,21.702,rs6555545,-0.032  
5,21.729,rs6860832,-0.029  
5,21.763,rs11954087,-0.023  
5,21.830,rs173134,-0.014  
5,21.938,rs1505016,-0.010  
5,21.959,rs9313243,-0.015  
5,21.971,rs786840,-0.003  
5,22.304,rs2657031,0.000  
5,22.425,rs10057636,0.001  
5,22.616,rs3777281,0.003  
5,22.722,rs1806112,0.005  
5,22.740,rs40680,0.005  
5,22.768,rs1805964,0.010  
5,22.811,rs10042101,0.010  
5,22.855,rs40666,0.010  
5,23.029,rs1805918,0.007  
5,23.215,rs1205725,0.001  
5,23.307,rs805153,-0.000  
5,23.321,rs42196,-0.000  
5,23.349,rs788469,-0.001  
5,23.404,rs666617,-0.002  
5,23.449,rs3798012,-0.002  
5,23.449,rs1858428,-0.002  
5,23.456,rs268532,-0.002  
5,23.477,rs3822799,-0.004  
5,23.483,rs436243,-0.002  
5,23.490,rs268542,-0.001  
5,23.534,rs433755,-0.001  
5,23.673,rs268551,-0.007  
5,23.686,rs6881628,-0.007  
5,23.704,rs1651283,-0.007  
5,23.713,rs17329702,-0.006  
5,23.734,rs150633,-0.005

5,23.769,rs218041,-0.007  
5,23.967,rs27843,-0.019  
5,24.161,rs4702641,-0.011  
5,24.162,rs194060,-0.010  
5,24.247,rs16883466,-0.008  
5,24.361,rs3094352,-0.000  
5,24.608,rs16883572,0.002  
5,24.641,rs2387174,0.002  
5,24.672,rs16883639,0.003  
5,24.717,rs4701850,0.003  
5,24.806,rs11739224,0.004  
5,24.816,rs2963899,0.005  
5,24.845,rs2963894,0.002  
5,24.925,rs6555620,0.001  
5,25.026,rs4272105,0.009  
5,25.042,rs11739710,0.009  
5,25.043,rs10044248,0.009  
5,25.110,rs2914722,0.011  
5,25.117,rs2914723,0.011  
5,25.214,rs1428954,0.012  
5,25.329,rs433676,0.008  
5,25.506,rs314734,0.001  
5,25.524,rs1476481,0.000  
5,25.547,rs314743,-0.001  
5,25.654,rs7719627,-0.001  
5,25.676,rs1876154,-0.001  
5,26.043,rs1911942,-0.002  
5,26.105,rs16884244,-0.003  
5,26.225,rs1508850,-0.006  
5,26.333,rs11133604,-0.004  
5,26.343,rs2292263,-0.003  
5,26.408,rs3846599,-0.001  
5,26.978,rs3932191,-0.000  
5,26.997,rs2589661,-0.000  
5,27.001,rs6892802,-0.000  
5,27.001,rs7732984,-0.000  
5,27.005,rs2589658,-0.000  
5,27.009,rs17816571,-0.000  
5,27.026,rs2673892,-0.000  
5,27.036,rs2589656,-0.002  
5,27.045,rs2936590,-0.003  
5,27.228,rs4702704,0.000  
5,27.324,rs10035299,0.000  
5,27.433,rs900531,0.000  
5,28.062,rs12186813,0.001  
5,28.083,rs2083232,-0.000  
5,28.169,rs6895554,-0.001  
5,28.235,rs6860099,-0.000  
5,28.253,rs17197013,-0.000  
5,28.279,rs1995364,-0.000  
5,28.298,rs16901129,-0.001  
5,28.335,rs1354134,-0.001  
5,28.353,rs16901148,-0.001  
5,28.357,rs852562,-0.001  
5,28.397,rs2937509,-0.001  
5,28.490,rs4702781,0.000  
5,28.530,rs1638362,-0.000  
5,28.625,rs1990004,-0.004  
5,28.664,rs16901339,-0.005  
5,28.671,rs13188937,-0.005  
5,28.673,rs6883143,-0.005



5,28.673,rs16901347,-0.005  
5,28.681,rs1018965,-0.005  
5,28.806,rs27520,-0.011  
5,29.019,rs13160436,-0.006  
5,29.053,rs6860372,-0.005  
5,29.055,rs26001,-0.005  
5,29.108,rs2012187,-0.004  
5,29.179,rs4702799,-0.004  
5,29.228,rs1423493,-0.005  
5,29.264,rs7702488,-0.003  
5,29.294,rs40485,-0.002  
5,29.312,rs31837,-0.002  
5,29.377,rs31888,-0.003  
5,29.625,rs32434,-0.003  
5,29.662,rs6893111,-0.003  
5,29.778,rs2530913,-0.000  
5,29.813,rs10513101,-0.000  
5,29.963,rs7732155,0.001  
5,30.029,rs7733427,0.004  
5,30.044,rs6554653,0.002  
5,30.092,rs1379903,0.001  
5,30.467,rs7449177,0.000  
5,30.707,rs17240093,0.000  
5,30.827,rs1373950,0.000  
5,30.833,rs11744397,0.000  
5,30.929,rs233348,0.001  
5,31.156,rs6871272,0.008  
5,31.206,rs10062092,0.009  
5,31.323,rs2896104,0.013  
5,31.326,rs6554809,0.014  
5,31.424,rs4701984,0.048  
5,31.466,rs795542,0.051  
5,31.498,rs17265607,0.050  
5,31.550,rs1596791,0.051  
5,31.557,rs6868995,0.050  
5,31.578,rs895314,0.050  
5,31.701,rs1445823,0.052  
5,31.887,rs339428,0.035  
5,31.920,rs7727798,0.030  
5,32.033,rs7720329,0.016  
5,32.115,rs7708445,0.020  
5,32.305,rs17298767,0.017  
5,32.458,rs149123,0.017  
5,32.950,rs27761,0.033  
5,32.956,rs17428704,0.034  
5,33.150,rs32811,0.061  
5,33.193,rs26217,0.068  
5,33.212,rs40297,0.071  
5,33.218,rs3993996,0.072  
5,33.259,rs17307347,0.061  
5,33.277,rs39968,0.062  
5,33.309,rs152619,0.064  
5,33.503,rs17297276,0.065  
5,33.519,rs16903631,0.064  
5,33.598,rs27911,0.067  
5,33.713,rs152363,0.071  
5,33.720,rs4702049,0.070  
5,33.741,rs3087948,0.057  
5,33.958,rs2921600,0.050  
5,34.024,rs835141,0.053  
5,34.082,rs844335,0.057

5,34.092,rs9666987,0.058  
5,34.148,rs706297,0.071  
5,34.160,rs10037304,0.073  
5,34.202,rs10513195,0.076  
5,34.290,rs32447,0.083  
5,34.437,rs7707492,0.102  
5,34.576,rs304562,0.114  
5,34.688,rs983889,0.124  
5,34.875,rs6892388,0.115  
5,34.900,rs3810847,0.116  
5,35.025,rs1393266,0.113  
5,35.047,rs32199,0.114  
5,35.072,rs7701823,0.113  
5,35.228,rs344701,0.111  
5,35.463,rs4702133,0.112  
5,35.696,rs6885471,0.090  
5,35.849,rs10520840,0.063  
5,35.911,rs4702146,0.056  
5,35.992,rs334493,0.050  
5,36.053,rs1240649,0.046  
5,36.095,rs154244,0.047  
5,36.104,rs431154,0.045  
5,36.105,rs2637146,0.045  
5,36.145,rs2592037,0.015  
5,36.166,rs14153,0.013  
5,36.257,rs13537,0.014  
5,36.409,rs25912,0.005  
5,36.443,rs31299,0.004  
5,36.533,rs10051970,-0.000  
5,36.577,rs10051930,-0.003  
5,36.662,rs250340,-0.010  
5,36.674,rs31509,-0.011  
5,36.786,rs25904,-0.018  
5,36.902,rs1872004,-0.027  
5,36.932,rs11745637,-0.024  
5,37.007,rs253324,-0.008  
5,37.108,rs9312938,-0.010  
5,37.168,rs17614174,-0.008  
5,37.179,rs17707882,-0.009  
5,37.233,rs2625210,-0.017  
5,37.236,rs2562338,-0.018  
5,37.245,rs7711618,-0.017  
5,37.340,rs2562350,-0.018  
5,37.418,rs17614462,-0.020  
5,37.470,rs2625177,-0.016  
5,37.650,rs249131,-0.003  
5,37.689,rs17708295,-0.002  
5,37.866,rs4360041,0.001  
5,38.018,rs6862915,0.012  
5,38.027,rs12519960,0.009  
5,38.028,rs17652001,0.008  
5,38.037,rs297178,0.008  
5,38.042,rs2896245,0.008  
5,38.057,rs2402350,0.010  
5,38.060,rs4602628,0.009  
5,38.066,rs1542598,0.007  
5,38.083,rs10053617,0.004  
5,38.085,rs11133892,0.003  
5,38.095,rs177110,0.003  
5,38.108,rs10475103,0.000  
5,38.124,rs298529,-0.000

5,38.136,rs2173759,0.001  
5,38.147,rs2459791,0.003  
5,38.151,rs10057009,0.003  
5,38.324,rs6865140,0.016  
5,38.367,rs6864067,0.022  
5,38.377,rs11958964,0.024  
5,38.386,rs10064153,0.024  
5,38.388,rs9292873,0.024  
5,38.391,rs13166250,0.025  
5,38.407,rs1355701,0.026  
5,38.570,rs13186768,0.031  
5,38.608,rs2561642,0.031  
5,38.666,rs442958,0.028  
5,38.780,rs1500206,0.032  
5,38.809,rs10056318,0.029  
5,38.859,rs1405705,0.025  
5,39.077,rs2102146,0.008  
5,39.081,rs16886683,0.007  
5,39.128,rs1021771,-0.000  
5,39.134,rs13172937,-0.001  
5,39.149,rs10062771,-0.001  
5,39.193,rs6893620,-0.000  
5,39.201,rs2201628,-0.000  
5,39.239,rs3935803,0.000  
5,39.397,rs7709474,0.001  
5,39.484,rs6888100,0.000  
5,39.536,rs16886133,0.000  
5,39.611,rs10520861,0.000  
5,39.635,rs770297,0.002  
5,39.643,rs3792727,0.001  
5,39.665,rs347720,0.003  
5,39.781,rs1521023,0.002  
5,40.109,rs13170493,0.002  
5,40.161,rs7706987,0.001  
5,40.315,rs10941711,0.002  
5,40.416,rs12520315,0.001  
5,40.455,rs2434781,0.003  
5,40.489,rs2434772,0.006  
5,40.541,rs6890147,0.014  
5,40.981,rs10039330,0.005  
5,41.002,rs10043532,0.005  
5,41.099,rs6896002,0.008  
5,41.132,rs7707385,0.007  
5,41.345,rs6452031,0.003  
5,41.519,rs7710738,0.001  
5,41.639,rs6865522,0.001  
5,41.661,rs6871980,0.001  
5,41.736,rs7710321,0.000  
5,41.801,rs1261397,0.000  
5,41.803,rs1261394,0.000  
5,41.874,rs10039824,-0.000  
5,42.043,rs16897695,0.000  
5,42.048,rs10053320,0.000  
5,42.155,rs11953049,0.000  
5,42.178,rs1561836,0.000  
5,42.196,rs13184821,-0.000  
5,42.196,rs16899832,-0.000  
5,42.208,rs1661975,-0.000  
5,42.218,rs11957688,-0.000  
5,42.264,rs1372667,-0.000  
5,42.506,rs1435247,-0.000

5,42.585,rs4701351,-0.004  
5,42.601,rs975072,-0.010  
5,42.605,rs919331,-0.011  
5,42.719,rs9686666,-0.024  
5,42.721,rs10037553,-0.024  
5,42.844,rs10075972,-0.033  
5,42.917,rs16892558,-0.037  
5,42.965,rs1521009,-0.040  
5,42.967,rs7719907,-0.040  
5,43.568,rs11954471,-0.036  
5,43.751,rs1435820,-0.045  
5,43.832,rs12519664,-0.041  
5,43.939,rs1978608,-0.031  
5,43.965,rs1346509,-0.030  
5,44.007,rs3815909,-0.035  
5,44.030,rs4290982,-0.037  
5,44.058,rs10473690,-0.036  
5,44.175,rs1505890,-0.038  
5,44.222,rs12152859,-0.052  
5,44.392,rs1960462,-0.049  
5,44.405,rs4421074,-0.044  
5,44.421,rs10071824,-0.049  
5,44.426,rs13173735,-0.047  
5,44.437,rs10055390,-0.040  
5,44.487,rs10042912,-0.022  
5,44.823,rs11955750,-0.020  
5,45.064,rs10073102,-0.025  
5,45.141,rs10036252,-0.025  
5,45.155,rs10520922,-0.026  
5,45.163,rs2126967,-0.026  
5,45.271,rs13161787,-0.026  
5,45.422,rs173585,-0.023  
5,45.431,rs10056274,-0.022  
5,45.460,rs1842249,-0.020  
5,45.480,rs9293221,-0.019  
5,45.488,rs11745199,-0.020  
5,45.524,rs4081229,-0.024  
5,45.568,rs6883139,-0.035  
5,45.585,rs2094805,-0.044  
5,45.619,rs6870351,-0.062  
5,45.670,rs10052385,-0.062  
5,45.691,rs12515630,-0.063  
5,45.783,rs12189045,-0.068  
5,45.816,rs12516042,-0.068  
5,46.035,rs1353954,-0.075  
5,46.054,rs1353956,-0.075  
5,46.369,rs818734,-0.072  
5,46.398,rs4701549,-0.065  
5,46.454,rs10072177,-0.057  
5,46.483,rs6871019,-0.054  
5,46.538,rs10461828,-0.054  
5,46.621,rs10071841,-0.053  
5,46.787,rs10473829,-0.056  
5,46.925,rs6894886,-0.053  
5,47.001,rs6870385,-0.041  
5,47.017,rs10520936,-0.039  
5,47.107,rs4867155,-0.030  
5,47.119,rs7702896,-0.027  
5,47.172,rs6862995,-0.017  
5,47.181,rs7717247,-0.017  
5,47.196,rs4371767,-0.014

5,47.241,rs13153654,-0.015  
5,47.254,rs13159803,-0.018  
5,47.268,rs919329,-0.021  
5,47.344,rs1494605,-0.041  
5,47.376,rs11745152,-0.046  
5,47.480,rs10056131,-0.046  
5,47.484,rs1154991,-0.051  
5,47.490,rs10061823,-0.058  
5,47.638,rs4867568,-0.044  
5,47.702,rs6450656,-0.028  
5,47.736,rs6865759,-0.032  
5,47.740,rs4406145,-0.032  
5,47.791,rs1363873,-0.022  
5,47.964,rs631844,-0.014  
5,47.987,rs679895,-0.013  
5,48.100,rs6450681,-0.012  
5,48.159,rs2162801,-0.011  
5,48.181,rs4867175,-0.011  
5,48.229,rs9790969,-0.008  
5,48.231,rs905858,-0.008  
5,48.239,rs1827710,-0.007  
5,48.261,rs588359,-0.004  
5,48.337,rs17573102,0.001  
5,48.370,rs3100935,0.003  
5,48.372,rs13169659,0.003  
5,48.372,rs2330148,0.003  
5,48.372,rs7728669,0.003  
5,48.464,rs7709002,0.013  
5,48.526,rs2914129,0.027  
5,48.558,rs10461885,0.027  
5,48.715,rs4147400,0.024  
5,48.763,rs9647537,0.022  
5,48.779,rs10044555,0.022  
5,48.941,rs4403185,0.023  
5,48.984,rs4295402,0.022  
5,49.252,rs12654311,0.019  
5,49.286,rs12515629,0.018  
5,49.297,rs7726359,0.018  
5,49.528,rs4867041,0.021  
5,49.962,rs7723097,0.040  
5,49.970,rs10050805,0.040  
5,50.050,rs12173144,0.037  
5,50.071,rs4502841,0.036  
5,50.135,rs6871087,0.030  
5,50.162,rs1732919,0.030  
5,50.195,rs10520971,0.011  
5,50.195,rs11739505,0.011  
5,50.285,rs10037832,0.003  
5,50.368,rs13172112,0.000  
5,50.410,rs16900599,-0.000  
5,50.433,rs10520964,-0.000  
5,50.459,rs9292420,-0.000  
5,50.465,rs7734751,-0.001  
5,50.478,rs7724768,-0.002  
5,50.479,rs7724797,-0.002  
5,50.500,rs4867306,-0.000  
5,50.564,rs4867311,0.001  
5,50.626,rs10075707,0.001  
5,50.648,rs3806851,0.001  
5,50.678,rs4535467,0.002  
5,50.724,rs4457092,0.003

5,50.841,rs2287582,0.008  
5,50.929,rs7733250,0.022  
5,50.953,rs334579,0.026  
5,50.988,rs550353,0.025  
5,51.127,rs524138,0.020  
5,51.233,rs6878195,0.015  
5,51.280,rs10520987,0.012  
5,51.367,rs250834,0.008  
5,51.416,rs13187570,0.009  
5,51.437,rs1560143,0.010  
5,51.456,rs7727036,0.012  
5,51.464,rs6885718,0.007  
5,51.465,rs6890960,0.006  
5,51.486,rs168825,0.005  
5,51.500,rs6450853,0.005  
5,51.519,rs1678916,0.009  
5,51.558,rs6450855,0.010  
5,51.610,rs16901514,0.010  
5,51.904,rs13157213,0.009  
5,51.962,rs16901583,0.008  
5,52.001,rs7718233,0.007  
5,52.039,rs4867084,0.006  
5,52.389,rs6450868,0.001  
5,52.432,rs16901644,0.002  
5,52.444,rs13347335,0.004  
5,52.450,rs2330778,0.009  
5,52.465,rs905836,0.017  
5,52.633,rs1107904,0.024  
5,52.699,rs13182372,0.025  
5,52.819,rs12521501,0.026  
5,52.960,rs10059238,0.014  
5,52.975,rs1553552,0.013  
5,53.022,rs16901697,0.012  
5,53.103,rs7706312,0.010  
5,53.118,rs7733163,0.010  
5,53.152,rs2052852,0.006  
5,53.154,rs6860464,0.006  
5,53.267,rs889216,0.004  
5,53.308,rs10039073,0.003  
5,53.328,rs438834,0.003  
5,53.335,rs328618,0.003  
5,53.384,rs283128,0.003  
5,53.411,rs10071707,0.004  
5,53.457,rs10066063,0.005  
5,53.563,rs157489,0.007  
5,53.682,rs4867105,0.008  
5,53.798,rs324433,0.017  
5,53.818,rs191241,0.007  
5,53.821,rs623435,0.010  
5,53.822,rs637396,0.010  
5,53.829,rs4867450,0.008  
5,53.829,rs603463,0.008  
5,53.884,rs10434584,0.008  
5,53.921,rs7717650,0.009  
5,53.994,rs6894230,0.010  
5,53.998,rs2112867,0.010  
5,54.008,rs818130,0.009  
5,54.040,rs1862523,0.020  
5,54.066,rs818126,0.033  
5,54.105,rs696831,0.030  
5,54.182,rs1173756,0.029

5,54.236,rs1173723,0.018  
5,54.245,rs7722828,0.018  
5,54.299,rs10472828,0.019  
5,54.400,rs2877294,0.027  
5,54.409,rs11954821,0.028  
5,54.511,rs16890687,0.029  
5,54.609,rs16890782,0.028  
5,54.698,rs6450965,0.026  
5,54.755,rs1438728,0.038  
5,54.845,rs256600,0.035  
5,54.868,rs4867517,0.033  
5,54.915,rs29967,0.033  
5,54.961,rs16891337,0.018  
5,54.971,rs408758,0.016  
5,54.976,rs4242083,0.013  
5,54.984,rs7730682,0.009  
5,54.992,rs13171234,0.009  
5,55.024,rs9791011,0.014  
5,55.205,rs12516835,0.017  
5,55.316,rs10062990,0.019  
5,55.861,rs2548032,0.028  
5,55.866,rs2591724,0.028  
5,55.867,rs1374017,0.028  
5,55.901,rs10521010,0.024  
5,55.934,rs35403,0.020  
5,55.951,rs3756464,0.023  
5,55.952,rs3822466,0.023  
5,55.959,rs250413,0.024  
5,55.965,rs2652130,0.025  
5,55.992,rs299596,0.020  
5,56.053,rs297622,0.009  
5,56.273,rs11743037,-0.007  
5,56.289,rs7449280,-0.006  
5,56.310,rs10066990,-0.005  
5,56.335,rs11738452,-0.004  
5,56.349,rs7736168,-0.000  
5,56.359,rs16903125,-0.004  
5,56.362,rs6885856,-0.005  
5,56.377,rs9292557,-0.007  
5,56.386,rs256323,-0.009  
5,56.413,rs448182,-0.001  
5,56.427,rs256295,-0.000  
5,56.447,rs3816325,0.001  
5,56.497,rs889319,0.008  
5,56.602,rs6893661,0.016  
5,56.800,rs6893365,0.033  
5,56.801,rs336463,0.031  
5,56.802,rs6897719,0.030  
5,56.818,rs6872783,0.024  
5,56.827,rs1048944,0.025  
5,56.837,rs6451173,0.026  
5,56.946,rs16899972,0.023  
5,57.003,rs37369,0.026  
5,57.015,rs10038101,0.026  
5,57.026,rs10941231,0.026  
5,57.029,rs10941232,0.026  
5,57.074,rs37389,0.024  
5,57.262,rs1609500,0.018  
5,57.301,rs7705676,0.019  
5,57.588,rs16902013,0.009  
5,57.668,rs286411,0.006

5,57.717,rs10061088,0.004  
5,57.719,rs4130679,0.004  
5,57.732,rs4869623,0.004  
5,57.740,rs3822735,0.003  
5,57.761,rs1287267,0.014  
5,57.826,rs37217,0.017  
5,57.830,rs7731023,0.017  
5,57.850,rs6872093,0.016  
5,58.040,rs6890672,0.008  
5,58.109,rs4351174,0.007  
5,58.381,rs4242264,0.003  
5,58.416,rs16903012,0.002  
5,58.423,rs10512652,0.002  
5,58.613,rs17358533,-0.000  
5,58.685,rs4391195,-0.001  
5,58.690,rs2562573,-0.001  
5,58.717,rs17290638,-0.000  
5,58.719,rs3776578,-0.002  
5,58.719,rs13168598,-0.002  
5,58.722,rs4869682,-0.002  
5,58.723,rs4869685,-0.002  
5,58.887,rs292182,-0.000  
5,58.990,rs17315781,0.000  
5,59.227,rs10076102,0.001  
5,59.462,rs2973086,0.005  
5,59.528,rs10941368,0.007  
5,59.597,rs1862573,0.008  
5,59.642,rs889268,0.011  
5,59.657,rs1895435,0.012  
5,59.659,rs2910739,0.012  
5,59.668,rs13187321,0.013  
5,59.715,rs1423435,0.017  
5,59.773,rs4574573,0.018  
5,59.789,rs2216712,0.024  
5,59.803,rs958502,0.031  
5,59.810,rs4869558,0.022  
5,59.825,rs2366837,0.031  
5,60.224,rs16903824,0.012  
5,60.447,rs270552,0.005  
5,60.530,rs270537,0.004  
5,60.774,rs2471055,0.002  
5,60.848,rs13355907,0.003  
5,60.865,rs3812048,0.003  
5,60.887,rs3936162,0.003  
5,60.944,rs4869449,0.001  
5,61.191,rs16903908,0.002  
5,61.199,rs2006889,0.002  
5,61.471,rs2059835,0.006  
5,61.472,rs16903957,0.006  
5,61.547,rs6879807,0.004  
5,61.608,rs3935014,0.007  
5,61.654,rs2956597,0.007  
5,62.087,rs3099115,0.005  
5,62.239,rs10037882,0.004  
5,62.350,rs12517759,0.004  
5,62.465,rs7723735,0.005  
5,62.471,rs10941406,0.001  
5,62.528,rs9687972,0.000  
5,62.568,rs11744747,0.000  
5,62.589,rs6888067,-0.000  
5,62.759,rs395157,-0.000



5,62.765,rs6862959,0.000  
5,62.795,rs2278325,0.000  
5,62.839,rs1897140,0.000  
5,63.327,rs2367894,0.002  
5,63.375,rs358501,0.002  
5,63.514,rs7710762,0.003  
5,63.607,rs696737,0.007  
5,63.621,rs17465965,0.008  
5,63.640,rs696743,0.008  
5,63.761,rs1362811,0.008  
5,63.930,rs155378,0.007  
5,64.061,rs3812042,0.003  
5,64.077,rs700241,0.002  
5,64.094,rs6884342,0.002  
5,64.234,rs3849774,0.000  
5,64.321,rs3909475,-0.000  
5,64.347,rs7735747,-0.000  
5,64.454,rs1501702,0.000  
5,64.481,rs7721839,0.000  
5,64.484,rs2962497,0.000  
5,64.510,rs11956118,0.000  
5,64.547,rs6451445,0.001  
5,64.555,rs4957216,0.001  
5,64.574,rs10038914,0.002  
5,64.632,rs184782,0.002  
5,64.649,rs46261,0.002  
5,64.655,rs353396,0.002  
5,64.708,rs6897022,0.001  
5,64.787,rs7720838,0.002  
5,64.860,rs11745901,0.004  
5,64.971,rs10512747,0.006  
5,64.975,rs323565,0.002  
5,65.010,rs16870514,0.004  
5,65.042,rs1078375,0.006  
5,65.049,rs7736582,0.006  
5,65.086,rs587412,0.007  
5,65.322,rs440781,0.013  
5,65.323,rs391781,0.020  
5,65.353,rs920908,0.015  
5,65.376,rs320615,0.012  
5,65.392,rs1380996,0.013  
5,65.403,rs10512771,0.016  
5,65.412,rs318060,0.018  
5,65.438,rs611647,0.025  
5,65.463,rs669684,0.033  
5,65.529,rs10512793,0.038  
5,65.595,rs2231910,0.037  
5,66.180,rs2972418,0.031  
5,66.213,rs4410646,0.031  
5,66.271,rs6180,0.033  
5,66.316,rs10512806,0.036  
5,66.323,rs11951328,0.036  
5,66.361,rs3849698,0.037  
5,66.390,rs6451664,0.039  
5,66.432,rs11744749,0.041  
5,66.452,rs17303482,0.042  
5,66.490,rs7727047,0.046  
5,66.582,rs6451722,0.057  
5,66.654,rs7721923,0.065  
5,66.775,rs11750845,0.075  
5,66.793,rs9292907,0.074

5,66.815,rs17320222,0.073  
5,66.838,rs13169538,0.072  
5,67.377,rs10052275,0.037  
5,67.382,rs10940346,0.031  
5,67.384,rs13355434,0.031  
5,67.391,rs7705385,0.026  
5,67.393,rs152926,0.025  
5,67.395,rs250212,0.024  
5,67.397,rs7446150,0.022  
5,67.398,rs2962255,0.017  
5,67.401,rs1039440,0.018  
5,67.404,rs4141540,0.026  
5,67.408,rs17824668,0.018  
5,67.409,rs9291789,0.017  
5,67.410,rs10471608,0.017  
5,67.484,rs9291954,0.025  
5,67.635,rs933779,0.027  
5,67.654,rs16879682,0.027  
5,67.675,rs10067693,0.026  
5,67.694,rs2161956,0.027  
5,67.699,rs10074909,0.027  
5,67.764,rs7721698,0.031  
5,67.858,rs10512982,0.028  
5,67.903,rs13176939,0.025  
5,68.071,rs2454585,0.036  
5,68.114,rs1423570,0.037  
5,68.143,rs11750248,0.034  
5,68.228,rs1904162,0.033  
5,68.388,rs2193968,0.043  
5,68.529,rs6859355,0.034  
5,68.581,rs252046,0.028  
5,68.620,rs13161622,0.021  
5,68.681,rs6872379,0.019  
5,68.714,rs381575,0.018  
5,68.843,rs702604,0.021  
5,68.868,rs7701591,0.026  
5,68.891,rs697112,0.031  
5,68.899,rs6883658,0.032  
5,68.968,rs31226,0.042  
5,69.088,rs279743,0.058  
5,69.122,rs3111643,0.066  
5,69.134,rs6882064,0.066  
5,69.154,rs16882764,0.095  
5,69.193,rs4597914,0.120  
5,69.209,rs7722951,0.127  
5,69.260,rs10223063,0.119  
5,69.355,rs2241403,0.106  
5,69.411,rs10073644,0.091  
5,69.478,rs2548621,0.100  
5,69.479,rs2548620,0.100  
5,69.517,rs11738700,0.126  
5,69.526,rs16883196,0.138  
5,69.562,rs11749226,0.189  
5,69.600,rs6450233,0.196  
5,69.699,rs12520102,0.199  
5,69.712,rs13188578,0.193  
5,69.737,rs1867685,0.189  
5,69.955,rs17627141,0.283  
5,70.025,rs1991497,0.321  
5,70.048,rs6450270,0.301  
5,70.049,rs3815916,0.301

5,70.066,rs1423249,0.305  
5,70.111,rs6875661,0.346  
5,70.119,rs1876680,0.355  
5,70.169,rs3105807,0.410  
5,70.355,rs4865934,0.473  
5,70.532,rs16884281,0.532  
5,70.633,rs2161504,0.577  
5,70.700,rs7707639,0.574  
5,70.709,rs10069751,0.575  
5,70.732,rs10059243,0.566  
5,70.861,rs318802,0.591  
5,70.889,rs321768,0.598  
5,70.894,rs318791,0.598  
5,70.939,rs10214316,0.588  
5,70.942,rs309622,0.588  
5,70.972,rs159546,0.586  
5,71.184,rs32498,0.623  
5,71.225,rs13328207,0.629  
5,71.239,rs152318,0.633  
5,71.272,rs11954699,0.631  
5,71.380,rs10471421,0.582  
5,71.496,rs157521,0.451  
5,71.505,rs29995,0.445  
5,71.510,rs30365,0.443  
5,71.511,rs30364,0.442  
5,71.519,rs30360,0.440  
5,71.572,rs3852144,0.432  
5,71.595,rs16885750,0.432  
5,71.610,rs4700382,0.432  
5,71.625,rs6891726,0.432  
5,71.640,rs10040902,0.432  
5,71.706,rs1479607,0.383  
5,71.712,rs1279627,0.382  
5,71.786,rs6872807,0.373  
5,71.797,rs1292144,0.377  
5,71.833,rs6898933,0.376  
5,71.877,rs6862199,0.375  
5,72.493,rs17732457,0.348  
5,72.497,rs16886614,0.348  
5,72.563,rs12659958,0.351  
5,72.568,rs7706787,0.350  
5,72.582,rs16886678,0.347  
5,72.589,rs331031,0.335  
5,72.798,rs831649,0.377  
5,72.833,rs6866482,0.374  
5,72.850,rs877454,0.371  
5,72.861,rs10940547,0.371  
5,72.885,rs952277,0.369  
5,72.895,rs10471439,0.368  
5,72.899,rs6898854,0.368  
5,72.908,rs7727791,0.368  
5,72.908,rs6877144,0.368  
5,72.962,rs2910498,0.382  
5,73.006,rs929809,0.391  
5,73.017,rs230841,0.393  
5,73.070,rs230844,0.380  
5,73.086,rs7718757,0.386  
5,73.115,rs2109479,0.435  
5,73.122,rs702697,0.437  
5,73.524,rs16887464,0.383  
5,73.712,rs12658525,0.398

5,73.712,rs13175618,0.398  
5,73.855,rs12651995,0.410  
5,73.968,rs6859725,0.401  
5,74.004,rs6885426,0.402  
5,74.149,rs11745219,0.399  
5,74.173,rs10214231,0.397  
5,74.220,rs245464,0.393  
5,74.347,rs11948619,0.388  
5,74.413,rs12153332,0.385  
5,74.531,rs965795,0.379  
5,74.624,rs293002,0.383  
5,74.634,rs7717684,0.373  
5,74.662,rs963443,0.339  
5,74.698,rs7728528,0.340  
5,74.731,rs1423359,0.340  
5,74.738,rs159746,0.345  
5,74.761,rs159384,0.351  
5,74.767,rs925824,0.353  
5,74.778,rs538776,0.375  
5,74.785,rs7707901,0.388  
5,74.926,rs1078368,0.401  
5,74.963,rs10514870,0.398  
5,75.028,rs10071163,0.382  
5,75.062,rs1824788,0.374  
5,75.067,rs1961,0.373  
5,75.077,rs1345792,0.371  
5,75.141,rs6450512,0.376  
5,75.180,rs35305,0.392  
5,75.235,rs296410,0.345  
5,75.340,rs13179321,0.292  
5,75.372,rs4699942,0.293  
5,75.401,rs7710463,0.292  
5,75.410,rs2963806,0.291  
5,75.452,rs4700365,0.292  
5,75.479,rs4235479,0.260  
5,75.531,rs1423471,0.232  
5,75.533,rs12188950,0.231  
5,75.568,rs2061254,0.231  
5,75.706,rs6868457,0.214  
5,75.718,rs4700416,0.221  
5,75.718,rs10044518,0.221  
5,75.773,rs1550816,0.276  
5,75.776,rs16892456,0.263  
5,75.777,rs1971513,0.259  
5,75.787,rs4699977,0.216  
5,75.789,rs409912,0.208  
5,75.793,rs7715669,0.204  
5,75.796,rs1501841,0.179  
5,75.799,rs36033,0.186  
5,75.891,rs187574,0.207  
5,75.907,rs2077786,0.210  
5,76.504,rs2342989,0.180  
5,76.610,rs2910475,0.175  
5,76.615,rs3846465,0.176  
5,76.644,rs1108159,0.190  
5,76.681,rs153867,0.210  
5,76.771,rs4700505,0.277  
5,76.789,rs1005051,0.274  
5,76.790,rs1900180,0.273  
5,76.805,rs7708428,0.295  
5,76.808,rs2642749,0.299

5,76.827,rs3107556,0.329  
5,76.885,rs1514577,0.332  
5,76.906,rs168416,0.350  
5,76.913,rs4235496,0.356  
5,76.937,rs346420,0.396  
5,76.940,rs346416,0.402  
5,76.946,rs58736,0.406  
5,76.996,rs7716031,0.399  
5,77.061,rs1566780,0.382  
5,77.071,rs7728227,0.381  
5,77.072,rs10056912,0.387  
5,77.078,rs13173277,0.436  
5,77.084,rs1503519,0.452  
5,77.090,rs10075443,0.467  
5,77.121,rs1580312,0.457  
5,77.135,rs358523,0.434  
5,77.140,rs358528,0.423  
5,77.392,rs7724701,0.450  
5,77.460,rs13186658,0.457  
5,77.519,rs10060705,0.417  
5,77.542,rs10461497,0.418  
5,77.566,rs275828,0.385  
5,77.631,rs2034995,0.408  
5,77.638,rs4518332,0.412  
5,77.711,rs6861737,0.455  
5,77.788,rs166473,0.486  
5,77.818,rs264768,0.513  
5,77.836,rs7710076,0.530  
5,77.854,rs17206779,0.503  
5,78.049,rs245526,0.558  
5,78.109,rs16893963,0.579  
5,78.228,rs40105,0.622  
5,78.275,rs7711329,0.651  
5,78.275,rs11957292,0.652  
5,78.282,rs6866449,0.667  
5,78.295,rs17185365,0.696  
5,78.312,rs251312,0.723  
5,78.466,rs27076,0.745  
5,78.495,rs253223,0.751  
5,78.500,rs187569,0.749  
5,78.513,rs7700366,0.760  
5,78.523,rs17251088,0.738  
5,78.523,rs7717523,0.738  
5,78.524,rs2914030,0.716  
5,78.538,rs1465566,0.714  
5,78.545,rs16895137,0.708  
5,78.629,rs12655442,0.627  
5,78.636,rs4700135,0.609  
5,78.646,rs10940072,0.579  
5,78.665,rs4499783,0.572  
5,78.696,rs6871758,0.521  
5,78.729,rs190480,0.509  
5,78.748,rs30732,0.521  
5,78.760,rs4700168,0.527  
5,78.764,rs36138,0.529  
5,78.789,rs461536,0.539  
5,78.802,rs13180646,0.538  
5,78.864,rs16896062,0.528  
5,78.880,rs1946260,0.558  
5,78.882,rs42325,0.560  
5,78.882,rs40206,0.543

5,78.882,rs706701,0.539  
5,78.884,rs1083523,0.474  
5,78.973,rs2548588,0.545  
5,79.066,rs2271358,0.538  
5,79.092,rs1560160,0.535  
5,79.097,rs16896377,0.537  
5,79.135,rs1627990,0.546  
5,79.156,rs7721781,0.552  
5,79.210,rs1835019,0.566  
5,79.770,rs1428609,0.793  
5,79.785,rs317976,0.816  
5,79.835,rs2200863,0.943  
5,79.840,rs4976077,0.940  
5,79.859,rs17237481,0.929  
5,79.906,rs4246766,0.900  
5,79.965,rs4131890,0.905  
5,80.025,rs6868612,0.904  
5,80.045,rs7720751,0.911  
5,80.126,rs9986158,0.995  
5,80.129,rs282292,0.959  
5,80.176,rs157445,0.972  
5,80.178,rs12697058,0.972  
5,80.196,rs6877998,0.980  
5,80.312,rs282280,0.968  
5,80.334,rs6449947,1.023  
5,80.630,rs2302975,1.325  
5,80.647,rs34306,1.341  
5,80.739,rs34289,1.404  
5,80.796,rs256497,1.435  
5,80.881,rs7721613,1.422  
5,80.945,rs830474,1.310  
5,80.956,rs853812,1.299  
5,81.024,rs706725,1.330  
5,81.206,rs2607391,1.384  
5,81.231,rs282416,1.350  
5,81.255,rs10070379,1.285  
5,81.267,rs12658051,1.267  
5,81.288,rs26685,1.320  
5,81.292,rs12516844,1.322  
5,81.308,rs28289,1.332  
5,81.338,rs2913277,1.348  
5,81.403,rs4131295,1.339  
5,81.439,rs10064315,1.336  
5,81.521,rs337253,1.305  
5,81.589,rs1185246,1.397  
5,81.591,rs6450041,1.396  
5,82.138,rs3761967,1.338  
5,82.395,rs2242372,1.375  
5,82.440,rs11949150,1.382  
5,82.460,rs281121,1.378  
5,82.461,rs2115031,1.378  
5,82.507,rs6859438,1.365  
5,82.526,rs7707837,1.359  
5,82.578,rs6891713,1.362  
5,82.714,rs2721775,1.369  
5,82.889,rs3857397,1.371  
5,82.900,rs898219,1.380  
5,82.959,rs1217824,1.420  
5,83.196,rs4569852,1.274  
5,83.218,rs2337692,1.262  
5,83.242,rs2118695,1.259

5,83.251,rs6874186,1.254  
5,83.295,rs10039706,1.221  
5,83.361,rs7710169,1.181  
5,83.471,rs9293273,1.115  
5,83.573,rs13158670,1.089  
5,83.585,rs10040192,1.081  
5,83.759,rs246565,1.026  
5,83.887,rs33425,0.988  
5,84.058,rs2548331,0.911  
5,84.302,rs549579,0.930  
5,84.342,rs575415,0.925  
5,84.389,rs7702108,0.930  
5,84.393,rs4703597,0.928  
5,84.509,rs4235676,0.927  
5,84.540,rs9293560,0.928  
5,84.840,rs6453008,0.967  
5,84.850,rs12651911,1.038  
5,84.863,rs819569,1.011  
5,85.005,rs6890730,1.001  
5,85.258,rs1038559,1.010  
5,85.308,rs16870980,0.990  
5,85.376,rs283622,0.962  
5,85.394,rs411585,0.899  
5,85.399,rs434008,0.893  
5,85.405,rs16871035,0.886  
5,85.491,rs2973536,0.801  
5,85.512,rs17666430,0.790  
5,85.578,rs255585,0.798  
5,85.619,rs1818123,0.749  
5,85.640,rs2840108,0.745  
5,85.708,rs191899,0.713  
5,85.710,rs10515174,0.712  
5,85.756,rs4704111,0.690  
5,85.786,rs292203,0.677  
5,85.787,rs167111,0.677  
5,85.791,rs2004500,0.734  
5,85.813,rs10515165,0.815  
5,85.839,rs7723844,0.857  
5,85.839,rs2962622,0.858  
5,85.847,rs292209,0.864  
5,85.851,rs1460806,0.861  
5,85.866,rs569120,0.852  
5,85.892,rs922202,0.912  
5,86.014,rs10454913,0.902  
5,86.138,rs16871870,0.842  
5,86.144,rs294971,0.838  
5,86.156,rs1873365,0.827  
5,86.212,rs6453061,0.759  
5,86.236,rs2927633,0.738  
5,86.313,rs212925,0.668  
5,86.407,rs2173671,0.647  
5,86.420,rs1428558,0.644  
5,86.510,rs300245,0.609  
5,86.606,rs300259,0.552  
5,86.686,rs12152861,0.498  
5,86.717,rs6453072,0.487  
5,86.727,rs820841,0.513  
5,86.827,rs17561000,0.468  
5,86.843,rs6867972,0.427  
5,86.975,rs1164694,0.419  
5,87.172,rs1164624,0.406

5,87.249,rs11739301,0.411  
5,87.422,rs7728102,0.420  
5,87.431,rs3934476,0.499  
5,87.991,rs9293646,0.465  
5,88.400,rs3846662,0.436  
5,88.784,rs5744707,0.478  
5,89.023,rs1001935,0.483  
5,89.327,rs4487476,0.454  
5,89.397,rs7731991,0.459  
5,89.430,rs4425488,0.460  
5,89.448,rs4235691,0.501  
5,89.635,rs10434645,0.491  
5,89.680,rs6879305,0.488  
5,89.732,rs1002541,0.482  
5,89.832,rs6879020,0.446  
5,89.863,rs2937719,0.438  
5,89.869,rs2937715,0.435  
5,89.869,rs16873292,0.435  
5,89.902,rs17747572,0.450  
5,89.927,rs2972844,0.444  
5,89.965,rs16873320,0.443  
5,90.055,rs890708,0.499  
5,90.097,rs4296785,0.549  
5,90.162,rs6898214,0.604  
5,90.207,rs2068434,0.554  
5,90.233,rs7727095,0.544  
5,90.242,rs7710225,0.541  
5,90.278,rs6872396,0.566  
5,90.421,rs961536,0.478  
5,90.424,rs2069682,0.476  
5,90.428,rs2069656,0.474  
5,90.461,rs17748939,0.461  
5,90.487,rs2287930,0.450  
5,90.496,rs7734540,0.452  
5,90.498,rs253093,0.452  
5,90.501,rs17568154,0.452  
5,90.513,rs2287933,0.456  
5,90.567,rs7723344,0.473  
5,90.607,rs2227800,0.489  
5,90.635,rs168752,0.500  
5,90.732,rs6453251,0.533  
5,90.826,rs6453259,0.548  
5,91.003,rs1715762,0.544  
5,91.007,rs1613519,0.544  
5,91.099,rs3792738,0.540  
5,91.303,rs10066702,0.533  
5,91.340,rs10473985,0.534  
5,91.499,rs995743,0.566  
5,91.549,rs1048834,0.588  
5,91.596,rs12519589,0.620  
5,91.597,rs10070420,0.621  
5,91.646,rs16874057,0.607  
5,91.647,rs963913,0.606  
5,91.659,rs16874059,0.607  
5,91.672,rs10462550,0.607  
5,91.691,rs9687206,0.607  
5,91.729,rs7702192,0.580  
5,91.817,rs11949597,0.543  
5,91.843,rs7732963,0.532  
5,91.891,rs335644,0.511  
5,91.897,rs2359877,0.512



5,91.917,rs33204,0.512  
5,92.111,rs6453323,0.500  
5,92.137,rs4704434,0.475  
5,92.137,rs7703420,0.476  
5,92.153,rs3933483,0.477  
5,92.172,rs6868555,0.449  
5,92.279,rs2652210,0.481  
5,92.422,rs6884279,0.534  
5,92.444,rs6881736,0.496  
5,92.488,rs11948823,0.483  
5,92.490,rs10514128,0.482  
5,92.534,rs4704462,0.469  
5,92.539,rs4704464,0.465  
5,92.541,rs7712357,0.463  
5,92.600,rs355416,0.364  
5,92.600,rs355415,0.363  
5,92.605,rs6874954,0.355  
5,92.608,rs355412,0.356  
5,92.621,rs10078715,0.324  
5,93.003,rs4572979,0.295  
5,93.033,rs6881634,0.294  
5,93.053,rs4267850,0.296  
5,93.302,rs344651,0.299  
5,93.388,rs9293757,0.306  
5,93.478,rs340085,0.275  
5,93.509,rs569523,0.302  
5,93.522,rs6897874,0.315  
5,93.525,rs2453766,0.322  
5,93.554,rs252235,0.362  
5,93.559,rs6863289,0.405  
5,93.568,rs16875887,0.412  
5,93.570,rs7704939,0.413  
5,93.570,rs754567,0.463  
5,93.572,rs2173012,0.486  
5,93.597,rs11960862,0.501  
5,93.614,rs6453417,0.480  
5,93.620,rs16875961,0.495  
5,93.629,rs4704525,0.505  
5,93.725,rs337853,0.585  
5,93.742,rs338460,0.589  
5,93.794,rs337847,0.602  
5,93.818,rs163129,0.608  
5,93.911,rs1984685,0.631  
5,93.961,rs586199,0.642  
5,93.980,rs3797546,0.642  
5,94.383,rs7732902,0.644  
5,94.538,rs6859667,0.642  
5,94.573,rs4323213,0.640  
5,94.695,rs7713917,0.745  
5,94.936,rs4441859,0.772  
5,94.951,rs13171893,0.767  
5,94.983,rs6453481,0.776  
5,94.992,rs259129,0.778  
5,95.012,rs6453484,0.781  
5,95.017,rs1129770,0.784  
5,95.025,rs10043986,0.789  
5,95.029,rs259065,0.789  
5,95.043,rs9293789,0.792  
5,95.058,rs259074,0.780  
5,95.102,rs265008,0.768  
5,95.144,rs6865146,0.732

5,95.148,rs7707589,0.685  
5,95.282,rs2247450,0.647  
5,95.292,rs16877483,0.641  
5,95.295,rs1465852,0.681  
5,95.299,rs2015459,0.680  
5,95.308,rs10474010,0.729  
5,95.319,rs10057542,0.718  
5,95.331,rs4704618,0.705  
5,95.357,rs7721370,0.700  
5,95.407,rs7726099,0.695  
5,95.536,rs10062770,0.665  
5,95.563,rs259035,0.654  
5,95.569,rs13188088,0.653  
5,95.706,rs9687094,0.652  
5,95.753,rs185105,0.713  
5,96.043,rs26784,0.728  
5,96.150,rs32989,0.728  
5,96.306,rs11949801,0.732  
5,96.371,rs10491488,0.832  
5,96.413,rs857671,0.889  
5,96.414,rs7717830,0.890  
5,96.425,rs500676,0.895  
5,96.428,rs7706448,0.896  
5,96.474,rs9293829,0.902  
5,96.486,rs10491487,0.900  
5,96.552,rs26905,0.886  
5,96.571,rs27650,0.890  
5,96.585,rs696879,0.885  
5,96.678,rs34116,0.790  
5,96.691,rs2114972,0.797  
5,96.739,rs4703825,0.748  
5,96.744,rs7718438,0.695  
5,96.757,rs17227806,0.752  
5,96.786,rs11958318,0.772  
5,96.950,rs1039326,0.719  
5,96.981,rs6881927,0.706  
5,97.013,rs7729671,0.696  
5,97.110,rs3763142,0.710  
5,97.196,rs16898954,0.683  
5,97.345,rs10056236,0.604  
5,97.661,rs393766,0.569  
5,97.755,rs4703849,0.524  
5,97.858,rs1501791,0.509  
5,97.873,rs6886425,0.506  
5,97.917,rs1566629,0.504  
5,97.981,rs11960716,0.506  
5,98.111,rs1485587,0.507  
5,98.380,rs4703871,0.588  
5,98.391,rs10491245,0.578  
5,98.395,rs224938,0.533  
5,98.637,rs905221,0.585  
5,98.748,rs6876647,0.551  
5,98.883,rs4703545,0.505  
5,98.935,rs1827396,0.503  
5,99.092,rs6452479,0.490  
5,99.236,rs12658884,0.465  
5,99.255,rs1363948,0.464  
5,99.259,rs9283781,0.464  
5,99.268,rs6892289,0.460  
5,99.309,rs7725235,0.449  
5,99.410,rs6892129,0.403

5,99.487,rs10073948,0.321  
5,99.550,rs6859331,0.280  
5,99.761,rs12187956,0.261  
5,99.788,rs166278,0.261  
5,99.930,rs40213,0.288  
5,99.965,rs42754,0.294  
5,100.063,rs1479569,0.314  
5,100.182,rs1805377,0.354  
5,100.210,rs1445780,0.357  
5,100.240,rs33598,0.367  
5,100.296,rs10074448,0.358  
5,100.304,rs336944,0.352  
5,100.361,rs336965,0.325  
5,100.367,rs13168731,0.292  
5,100.385,rs7735782,0.294  
5,100.417,rs4703961,0.299  
5,100.499,rs6897626,0.372  
5,100.707,rs6882023,0.419  
5,100.738,rs10056609,0.420  
5,100.954,rs2301070,0.387  
5,101.048,rs7725025,0.347  
5,101.066,rs194124,0.345  
5,101.171,rs4590163,0.324  
5,101.240,rs350477,0.304  
5,101.261,rs2941228,0.294  
5,101.330,rs10041822,0.295  
5,101.361,rs10071420,0.288  
5,101.380,rs7710912,0.293  
5,101.384,rs6892080,0.288  
5,101.411,rs4461632,0.310  
5,101.420,rs1158242,0.324  
5,101.434,rs4235660,0.335  
5,101.445,rs16901251,0.334  
5,101.455,rs11950801,0.333  
5,101.461,rs11958924,0.330  
5,101.477,rs13171180,0.325  
5,101.484,rs3913424,0.324  
5,101.552,rs9968655,0.333  
5,101.615,rs4602659,0.353  
5,101.640,rs778233,0.355  
5,101.750,rs1366589,0.338  
5,101.830,rs4920699,0.333  
5,101.876,rs6874335,0.314  
5,101.880,rs13176279,0.313  
5,101.889,rs1500258,0.305  
5,101.910,rs7710314,0.281  
5,102.033,rs7733888,0.264  
5,102.046,rs2410719,0.261  
5,102.106,rs11950177,0.258  
5,102.157,rs2898543,0.229  
5,102.197,rs1493354,0.212  
5,102.347,rs6872716,0.219  
5,102.350,rs2112167,0.219  
5,102.388,rs6870700,0.213  
5,102.475,rs6861271,0.198  
5,102.521,rs10067098,0.190  
5,102.701,rs13179657,0.181  
5,102.761,rs710384,0.178  
5,102.789,rs710375,0.175  
5,102.795,rs16902822,0.175  
5,103.125,rs2582045,0.142

5,103.344,rs193689,0.129  
5,103.487,rs6452824,0.110  
5,103.592,rs6875289,0.099  
5,103.668,rs7702020,0.091  
5,103.817,rs4342357,0.100  
5,103.999,rs1449228,0.110  
5,104.118,rs10035607,0.119  
5,104.500,rs386138,0.104  
5,104.843,rs10060427,0.102  
5,104.898,rs2203822,0.104  
5,105.022,rs10213801,0.108  
5,105.053,rs16869330,0.108  
5,105.082,rs2010355,0.108  
5,105.101,rs10454910,0.104  
5,105.136,rs4458614,0.116  
5,105.161,rs6452944,0.116  
5,105.184,rs2941894,0.116  
5,105.241,rs6452949,0.120  
5,105.322,rs1661037,0.133  
5,105.348,rs17641623,0.135  
5,105.397,rs2202510,0.144  
5,105.417,rs7716797,0.141  
5,105.498,rs13168674,0.103  
5,105.522,rs12188200,0.110  
5,105.544,rs7709237,0.109  
5,105.556,rs1532694,0.105  
5,105.565,rs972727,0.100  
5,105.576,rs10075131,0.112  
5,105.598,rs34963,0.135  
5,105.600,rs1422168,0.138  
5,105.623,rs154809,0.163  
5,105.643,rs17082593,0.163  
5,105.651,rs1422164,0.162  
5,105.668,rs17082603,0.162  
5,105.716,rs10057574,0.164  
5,105.781,rs34508,0.164  
5,105.881,rs13188341,0.155  
5,105.962,rs4242245,0.148  
5,106.000,rs4434363,0.143  
5,106.001,rs7701128,0.143  
5,106.033,rs13166639,0.111  
5,106.243,rs10042892,0.088  
5,106.358,rs9285013,0.086  
5,106.450,rs17314172,0.084  
5,106.466,rs11135394,0.083  
5,106.802,rs981862,0.036  
5,106.932,rs2160758,0.014  
5,106.946,rs952664,0.013  
5,107.069,rs392632,0.013  
5,107.115,rs1124667,0.013  
5,107.163,rs954490,0.013  
5,107.253,rs153898,0.014  
5,107.260,rs27005,0.014  
5,107.290,rs26999,0.013  
5,107.320,rs457891,0.008  
5,107.326,rs293033,0.007  
5,107.341,rs1437118,0.007  
5,107.444,rs1895865,0.002  
5,107.456,rs1426095,0.002  
5,107.468,rs7732431,0.001  
5,107.477,rs3852192,0.001

5,107.505,rs251076,0.001  
5,107.591,rs33809,0.001  
5,107.676,rs2560266,0.000  
5,107.685,rs253720,0.001  
5,107.701,rs6894872,0.004  
5,107.704,rs2162716,0.004  
5,107.751,rs12516085,0.006  
5,107.846,rs17084933,0.017  
5,107.873,rs11747129,0.022  
5,107.898,rs461873,0.026  
5,107.976,rs13188464,0.018  
5,107.980,rs3777218,0.021  
5,108.000,rs6556882,0.031  
5,108.014,rs9314160,0.030  
5,108.016,rs871775,0.030  
5,108.050,rs248340,0.022  
5,108.063,rs147295,0.023  
5,108.076,rs13174591,0.023  
5,108.198,rs10428702,0.027  
5,108.380,rs6864629,0.032  
5,108.484,rs436321,0.029  
5,108.497,rs3762986,0.022  
5,108.525,rs269853,0.025  
5,108.527,rs6860611,0.026  
5,108.531,rs155437,0.026  
5,108.578,rs11135467,0.031  
5,108.626,rs261212,0.030  
5,108.639,rs2611713,0.028  
5,108.646,rs155041,0.025  
5,108.651,rs155054,0.026  
5,108.669,rs1862182,0.021  
5,108.701,rs10053056,0.016  
5,108.721,rs149313,0.016  
5,108.746,rs25862,0.014  
5,108.768,rs30333,0.012  
5,108.829,rs2549779,0.016  
5,108.857,rs7714122,0.018  
5,108.937,rs11746232,0.024  
5,108.945,rs27439,0.025  
5,108.994,rs31016,0.026  
5,109.013,rs13167790,0.036  
5,109.026,rs39597,0.057  
5,109.051,rs3734010,0.090  
5,109.053,rs10515255,0.091  
5,109.220,rs2351732,0.052  
5,109.344,rs6894105,0.039  
5,109.459,rs1429863,0.041  
5,109.598,rs1423319,0.014  
5,109.638,rs1423322,0.009  
5,109.639,rs4362966,0.009  
5,109.652,rs257239,0.002  
5,109.662,rs4482923,0.001  
5,109.722,rs10866786,0.000  
5,109.725,rs17088027,0.000  
5,109.766,rs6889798,0.000  
5,109.768,rs7725828,0.000  
5,109.815,rs9314227,0.000  
5,109.925,rs1378438,0.003  
5,109.983,rs1037599,0.005  
5,110.023,rs10515276,0.006  
5,110.120,rs2112145,0.006

5,110.193,rs992592,0.006  
5,110.246,rs331934,0.005  
5,110.461,rs10057320,0.005  
5,110.516,rs17166548,0.005  
5,110.638,rs12109262,0.003  
5,110.760,rs2030605,0.001  
5,111.046,rs2369754,0.001  
5,111.112,rs2602970,0.001  
5,111.118,rs2602972,0.000  
5,111.133,rs9326958,0.000  
5,111.334,rs1504534,-0.000  
5,111.337,rs10515301,-0.000  
5,111.396,rs4703100,-0.001  
5,111.434,rs6862495,-0.000  
5,111.476,rs2544911,-0.001  
5,111.526,rs563361,-0.001  
5,111.569,rs11949216,-0.004  
5,111.604,rs6860058,-0.003  
5,111.641,rs3907457,-0.002  
5,111.663,rs12654056,-0.001  
5,111.689,rs4490561,-0.000  
5,111.763,rs6861497,-0.000  
5,111.800,rs598440,-0.003  
5,111.861,rs2400796,-0.001  
5,111.922,rs2657449,-0.000  
5,111.974,rs6868471,-0.005  
5,111.978,rs1363786,-0.006  
5,112.061,rs11744885,-0.004  
5,112.113,rs2561481,-0.002  
5,112.132,rs6596533,-0.003  
5,112.138,rs3846615,-0.005  
5,112.154,rs34236,-0.013  
5,112.162,rs808042,-0.014  
5,112.200,rs7349833,-0.013  
5,112.256,rs950664,-0.005  
5,112.280,rs6596557,-0.004  
5,112.372,rs1922495,-0.003  
5,112.480,rs2715841,-0.002  
5,112.580,rs1372501,-0.003  
5,112.607,rs325523,-0.004  
5,112.717,rs1612927,-0.002  
5,112.737,rs319897,-0.001  
5,112.765,rs7704764,-0.001  
5,112.767,rs1370955,-0.001  
5,112.802,rs10479307,-0.001  
5,112.879,rs1428878,-0.004  
5,112.953,rs7702850,-0.006  
5,112.991,rs4128686,-0.004  
5,112.996,rs4588563,-0.004  
5,113.118,rs11739877,-0.008  
5,113.133,rs4957661,-0.009  
5,113.158,rs7710861,-0.010  
5,113.169,rs4301221,-0.011  
5,113.234,rs2410869,-0.015  
5,113.270,rs9327976,-0.013  
5,113.272,rs12109609,-0.013  
5,113.344,rs296200,-0.006  
5,113.379,rs159404,-0.006  
5,113.439,rs7706863,-0.008  
5,113.447,rs4421088,-0.008  
5,113.456,rs6880898,-0.009

5,113.543,rs4382152,-0.007  
5,113.619,rs10900899,-0.002  
5,113.648,rs34566,-0.002  
5,113.650,rs1363896,-0.002  
5,113.817,rs7713807,-0.001  
5,114.107,rs252991,0.000  
5,114.201,rs152580,-0.000  
5,114.229,rs26247,-0.002  
5,114.330,rs25976,-0.015  
5,114.378,rs153118,-0.021  
5,114.394,rs17534319,-0.023  
5,114.498,rs467089,-0.040  
5,114.626,rs9328010,-0.028  
5,114.820,rs6887589,-0.023  
5,114.842,rs173644,-0.014  
5,114.845,rs10052705,-0.014  
5,114.852,rs7708590,-0.014  
5,114.859,rs1974789,-0.013  
5,114.861,rs6888461,-0.014  
5,114.871,rs4957724,-0.028  
5,114.891,rs998906,-0.027  
5,114.898,rs11743737,-0.029  
5,114.945,rs13176829,-0.050  
5,114.966,rs12515105,-0.061  
5,115.106,rs12517224,-0.064  
5,115.135,rs10050689,-0.067  
5,115.136,rs9326745,-0.067  
5,115.203,rs17161562,-0.061  
5,115.219,rs7735749,-0.060  
5,115.249,rs1896582,-0.055  
5,115.300,rs6864212,-0.056  
5,115.322,rs6877265,-0.064  
5,115.323,rs1990892,-0.064  
5,115.416,rs11241027,-0.052  
5,115.610,rs1432805,-0.036  
5,115.640,rs2033463,-0.035  
5,115.702,rs36811,-0.024  
5,115.715,rs17596440,-0.025  
5,115.788,rs2416227,-0.037  
5,115.800,rs1563324,-0.038  
5,115.810,rs1455554,-0.039  
5,115.855,rs2966752,-0.043  
5,115.907,rs7717231,-0.066  
5,115.963,rs4460176,-0.074  
5,116.034,rs4330505,-0.079  
5,116.694,rs6594475,-0.094  
5,116.932,rs17132718,-0.124  
5,116.996,rs7723819,-0.108  
5,117.109,rs1806353,-0.112  
5,117.181,rs919334,-0.119  
5,117.280,rs216535,-0.117  
5,117.331,rs306079,-0.110  
5,117.409,rs3797755,-0.097  
5,117.424,rs306117,-0.096  
5,117.570,rs3733995,-0.085  
5,117.579,rs42670,-0.086  
5,117.658,rs247527,-0.085  
5,117.818,rs6885593,-0.058  
5,117.868,rs1154308,-0.038  
5,117.994,rs529279,-0.025  
5,118.013,rs192276,-0.026

5,118.121,rs10073581,-0.031  
5,118.126,rs10515441,-0.030  
5,118.127,rs2140623,-0.028  
5,118.128,rs6594590,-0.025  
5,118.130,rs163618,-0.021  
5,118.171,rs3934641,-0.009  
5,118.206,rs6887003,-0.006  
5,118.211,rs7446319,-0.005  
5,118.228,rs4355511,-0.004  
5,118.235,rs17134832,-0.005  
5,118.241,rs4705739,-0.008  
5,118.497,rs9784647,-0.003  
5,118.679,rs569540,-0.003  
5,118.709,rs17135534,-0.004  
5,118.909,rs1864063,-0.015  
5,118.921,rs10519361,-0.016  
5,118.982,rs1871916,-0.019  
5,119.034,rs17135999,-0.029  
5,119.037,rs10477505,-0.029  
5,119.137,rs11950195,-0.014  
5,119.157,rs6594771,-0.014  
5,119.179,rs6894635,-0.016  
5,119.221,rs12658199,-0.018  
5,119.269,rs11241258,-0.021  
5,119.293,rs2632151,-0.023  
5,119.341,rs1487222,-0.032  
5,119.503,rs6594807,-0.027  
5,119.545,rs2416366,-0.026  
5,119.580,rs36935,-0.019  
5,119.650,rs337715,-0.037  
5,119.826,rs6869551,-0.067  
5,119.885,rs17137452,-0.088  
5,119.890,rs2974617,-0.090  
5,119.892,rs6866580,-0.091  
5,119.944,rs10076833,-0.087  
5,119.974,rs2100521,-0.087  
5,119.981,rs2925178,-0.086  
5,120.013,rs751485,-0.063  
5,120.014,rs2166339,-0.061  
5,120.017,rs269537,-0.058  
5,120.029,rs269526,-0.046  
5,120.057,rs2112613,-0.059  
5,120.065,rs9687184,-0.071  
5,120.078,rs7712026,-0.065  
5,120.096,rs256975,-0.060  
5,120.142,rs1820631,-0.051  
5,120.165,rs465437,-0.048  
5,120.171,rs251890,-0.047  
5,120.228,rs1529453,-0.056  
5,120.265,rs154763,-0.061  
5,120.309,rs258737,-0.061  
5,120.433,rs152367,-0.057  
5,120.525,rs252738,-0.047  
5,120.590,rs156666,-0.041  
5,120.686,rs6866413,-0.043  
5,120.689,rs7341066,-0.042  
5,120.719,rs12187953,-0.037  
5,120.732,rs10044122,-0.035  
5,120.770,rs17138656,-0.034  
5,120.796,rs1428089,-0.034  
5,120.815,rs11241350,-0.035



5,120.851,rs1541802,-0.035  
5,121.703,rs1963858,-0.058  
5,121.784,rs154601,-0.067  
5,121.789,rs1014643,-0.068  
5,121.791,rs32972,-0.055  
5,121.792,rs32974,-0.055  
5,121.811,rs153644,-0.053  
5,121.821,rs7721479,-0.060  
5,121.847,rs154577,-0.073  
5,121.854,rs7702266,-0.071  
5,121.897,rs10077439,-0.061  
5,121.906,rs254230,-0.057  
5,122.001,rs13361662,-0.024  
5,122.028,rs607930,-0.018  
5,122.038,rs632993,-0.009  
5,122.061,rs680404,-0.006  
5,122.068,rs635958,-0.006  
5,122.336,rs2068933,-0.003  
5,122.364,rs13188755,-0.004  
5,122.369,rs6892910,-0.004  
5,122.379,rs2933646,-0.004  
5,122.444,rs2937067,-0.005  
5,122.472,rs698377,-0.002  
5,122.573,rs698384,0.003  
5,122.613,rs6876340,0.003  
5,122.642,rs2112342,0.003  
5,122.784,rs6866207,0.001  
5,122.943,rs930922,0.002  
5,123.023,rs12521805,0.001  
5,123.036,rs6872138,0.001  
5,123.133,rs6862540,0.000  
5,123.178,rs2036023,0.000  
5,123.300,rs1021516,0.000  
5,123.589,rs4457117,0.002  
5,123.687,rs2624495,0.002  
5,123.782,rs13164296,0.001  
5,124.000,rs265893,-0.001  
5,124.057,rs9327050,-0.000  
5,124.340,rs6887429,-0.000  
5,124.443,rs4302625,0.000  
5,124.500,rs6595079,-0.000  
5,124.517,rs9327065,-0.000  
5,124.523,rs10037996,-0.000  
5,124.727,rs6882527,-0.002  
5,124.748,rs7711344,-0.002  
5,124.759,rs6595125,-0.002  
5,124.786,rs4329039,-0.000  
5,124.816,rs3924079,0.000  
5,124.831,rs6595143,0.000  
5,124.870,rs1002916,0.000  
5,124.877,rs2043048,0.000  
5,124.883,rs1429736,0.000  
5,124.898,rs2914908,0.001  
5,124.922,rs1429708,0.001  
5,124.948,rs7727675,0.003  
5,125.098,rs259174,0.020  
5,125.350,rs11747748,0.029  
5,125.520,rs11948980,0.025  
5,125.636,rs246210,0.025  
5,125.772,rs1428710,0.018  
5,125.835,rs6885430,0.015

5,125.864,rs11241609,0.024  
5,125.885,rs1508805,0.025  
5,125.938,rs1876648,0.027  
5,125.971,rs10056717,0.033  
5,125.977,rs17148296,0.033  
5,126.040,rs6595322,0.041  
5,126.090,rs1560550,0.047  
5,126.111,rs4632823,0.046  
5,126.149,rs9637910,0.041  
5,126.312,rs3900446,0.022  
5,126.314,rs2560302,0.025  
5,126.451,rs992788,0.057  
5,126.588,rs17434434,0.068  
5,126.848,rs6866750,0.074  
5,126.950,rs4629597,0.075  
5,126.970,rs7727904,0.074  
5,127.065,rs17149450,0.053  
5,127.213,rs1545696,0.042  
5,127.283,rs3776184,0.041  
5,127.287,rs929772,0.041  
5,127.289,rs4836483,0.046  
5,127.290,rs10519721,0.047  
5,127.370,rs1030179,0.037  
5,127.387,rs11748635,0.023  
5,127.416,rs9687603,0.019  
5,127.586,rs2067077,0.027  
5,127.640,rs6595498,0.023  
5,127.747,rs10076322,0.018  
5,127.751,rs4240372,0.018  
5,127.767,rs989919,0.019  
5,127.842,rs17151283,0.024  
5,127.866,rs37391,0.024  
5,127.895,rs12188854,0.025  
5,127.940,rs149533,0.026  
5,128.047,rs920997,0.034  
5,128.176,rs895298,0.039  
5,128.193,rs7705687,0.044  
5,128.242,rs393547,0.049  
5,128.254,rs4568357,0.048  
5,128.267,rs6890381,0.054  
5,128.272,rs4574539,0.057  
5,128.393,rs1494671,0.044  
5,128.436,rs6873640,0.029  
5,128.547,rs6862252,0.070  
5,128.550,rs7721111,0.069  
5,128.574,rs6595536,0.062  
5,128.604,rs4616890,0.059  
5,128.636,rs4836112,0.060  
5,128.735,rs10069971,0.048  
5,128.763,rs6882715,0.063  
5,128.790,rs4357032,0.052  
5,128.852,rs930606,0.043  
5,128.995,rs2028855,0.023  
5,129.020,rs6875187,0.023  
5,129.079,rs4240388,0.022  
5,129.109,rs6874416,0.022  
5,129.254,rs7735615,0.022  
5,129.286,rs1550363,0.028  
5,129.299,rs6868078,0.031  
5,129.341,rs1439593,0.043  
5,129.342,rs6595591,0.043

5,129.356,rs1550370,0.042  
5,129.365,rs920386,0.041  
5,129.381,rs10075641,0.042  
5,129.453,rs1347924,0.044  
5,129.481,rs17152569,0.041  
5,129.500,rs1530121,0.039  
5,129.554,rs10519815,0.034  
5,129.576,rs13354270,0.033  
5,129.679,rs2678173,0.031  
5,129.729,rs7736468,0.030  
5,129.772,rs1400870,0.030  
5,129.839,rs331746,0.030  
5,129.840,rs331744,0.030  
5,129.845,rs7712191,0.032  
5,129.855,rs2125139,0.035  
5,129.904,rs9327361,0.050  
5,129.925,rs330339,0.057  
5,129.931,rs6595634,0.051  
5,129.938,rs2431597,0.045  
5,129.941,rs17153316,0.049  
5,129.945,rs2431598,0.042  
5,129.949,rs329174,0.042  
5,129.964,rs327826,0.034  
5,130.107,rs327816,0.032  
5,130.124,rs10042047,0.032  
5,130.181,rs6859953,0.030  
5,130.196,rs955626,0.029  
5,130.232,rs10042286,0.025  
5,130.246,rs11747637,0.024  
5,130.415,rs918440,0.026  
5,130.417,rs6595693,0.026  
5,130.431,rs7733479,0.033  
5,130.460,rs11740466,0.026  
5,130.485,rs11241891,0.015  
5,130.494,rs4426911,0.008  
5,130.506,rs6886050,0.009  
5,130.528,rs4836266,0.012  
5,130.560,rs11953659,0.011  
5,130.564,rs4836271,0.011  
5,130.578,rs12513847,0.018  
5,130.589,rs6870785,0.024  
5,130.650,rs7701818,0.018  
5,130.672,rs7720178,0.014  
5,130.703,rs907195,0.008  
5,130.726,rs2036846,0.008  
5,130.730,rs2271353,0.008  
5,130.746,rs3812062,0.009  
5,130.787,rs3805739,0.012  
5,130.800,rs17165293,0.011  
5,130.978,rs6870711,0.010  
5,130.989,rs3936305,0.010  
5,131.271,rs6894441,0.006  
5,131.415,rs3909885,0.017  
5,131.454,rs791333,0.018  
5,131.463,rs10478774,0.012  
5,131.550,rs791077,0.016  
5,131.560,rs7711139,0.017  
5,132.106,rs1520246,0.004  
5,132.200,rs9327462,0.002  
5,132.252,rs251215,0.002  
5,132.262,rs2307108,0.002

5,132.269,rs32215,0.000  
5,132.276,rs331095,-0.000  
5,132.280,rs3805646,-0.000  
5,132.281,rs3805648,-0.000  
5,132.321,rs10072361,0.000  
5,132.344,rs6891265,0.000  
5,132.359,rs17165184,0.002  
5,132.368,rs2059124,0.002  
5,132.396,rs2312243,0.004  
5,132.416,rs7732209,0.005  
5,132.461,rs17618074,0.007  
5,132.512,rs10054567,0.009  
5,132.642,rs252671,0.014  
5,132.689,rs7717089,0.021  
5,132.819,rs10077875,0.031  
5,132.843,rs12515721,0.034  
5,133.231,rs1363475,0.065  
5,133.271,rs6858978,0.070  
5,133.297,rs6869219,0.072  
5,133.298,rs11741204,0.073  
5,133.830,rs3805685,0.074  
5,133.845,rs7733814,0.074  
5,133.912,rs272873,0.071  
5,133.939,rs2073643,0.071  
5,133.944,rs7705826,0.070  
5,133.974,rs7703230,0.070  
5,134.022,rs743562,0.054  
5,134.027,rs2069812,0.054  
5,134.060,rs2522391,0.053  
5,134.094,rs2243204,0.052  
5,134.114,rs1468216,0.050  
5,134.167,rs803139,0.049  
5,134.197,rs7721926,0.055  
5,134.214,rs42395,0.058  
5,134.296,rs3885730,0.048  
5,134.343,rs7730747,0.044  
5,134.388,rs4515334,0.050  
5,134.476,rs2162769,0.052  
5,134.483,rs3828692,0.052  
5,134.497,rs736324,0.055  
5,134.506,rs959727,0.052  
5,134.521,rs11741756,0.055  
5,134.528,rs17681747,0.053  
5,134.529,rs890815,0.053  
5,134.589,rs10900816,0.036  
5,134.602,rs7708975,0.023  
5,134.603,rs10515457,0.022  
5,134.663,rs4958121,0.005  
5,134.690,rs700715,0.001  
5,134.714,rs7729507,0.000  
5,134.755,rs25869,0.000  
5,134.783,rs718410,0.002  
5,134.788,rs246961,0.002  
5,134.797,rs27986,0.002  
5,134.819,rs1366604,0.003  
5,134.834,rs397649,0.004  
5,134.847,rs700703,0.004  
5,134.872,rs187411,0.001  
5,135.062,rs9327661,0.001  
5,135.112,rs4958095,0.000  
5,135.132,rs4958144,0.000

5,135.157,rs6596146,0.000  
5,135.218,rs11749241,-0.000  
5,135.311,rs4958148,-0.001  
5,135.316,rs17700949,-0.001  
5,135.322,rs17166987,-0.001  
5,135.329,rs1109309,-0.001  
5,135.472,rs731432,-0.001  
5,135.481,rs3909368,-0.001  
5,135.564,rs17167104,-0.003  
5,135.591,rs1644308,-0.004  
5,135.627,rs10055533,-0.001  
5,135.652,rs1618181,0.000  
5,135.660,rs6874189,0.001  
5,135.661,rs3936585,0.001  
5,135.681,rs6865260,0.002  
5,135.755,rs10068191,0.007  
5,135.772,rs10074308,0.007  
5,135.849,rs244669,0.008  
5,135.853,rs244689,0.007  
5,135.977,rs17165388,0.006  
5,136.053,rs258514,0.004  
5,136.056,rs258522,0.006  
5,136.066,rs17644077,0.014  
5,136.073,rs329115,0.014  
5,136.087,rs2084007,0.014  
5,136.093,rs329317,0.014  
5,136.188,rs435397,0.012  
5,136.190,rs10463924,0.012  
5,136.286,rs6596189,0.014  
5,136.314,rs254551,0.015  
5,136.432,rs495406,0.022  
5,136.462,rs641455,0.019  
5,136.550,rs11950409,0.004  
5,136.552,rs12514014,0.004  
5,136.558,rs631607,0.004  
5,136.568,rs2019973,0.002  
5,136.572,rs6896456,0.002  
5,136.581,rs17168022,0.002  
5,136.611,rs2603021,0.003  
5,136.651,rs2652092,0.002  
5,136.664,rs13163460,0.001  
5,136.697,rs3756366,0.002  
5,136.840,rs12520809,0.000  
5,136.943,rs6882472,0.001  
5,137.238,rs7732567,0.004  
5,137.306,rs31265,0.000  
5,137.324,rs2521968,0.000  
5,137.454,rs17168882,-0.000  
5,137.516,rs17168961,-0.000  
5,137.799,rs17169180,0.001  
5,137.876,rs4976375,0.000  
5,137.941,rs1557918,0.001  
5,138.040,rs31551,0.001  
5,138.042,rs30743,0.002  
5,138.045,rs30746,0.003  
5,138.075,rs6880837,0.004  
5,138.091,rs7715300,0.004  
5,138.233,rs2673925,0.006  
5,138.260,rs346658,0.005  
5,138.304,rs10042003,0.006  
5,138.373,rs4976518,0.006

5,138.659,rs2214993,0.008  
5,138.773,rs17170751,0.005  
5,138.820,rs4308478,0.004  
5,138.824,rs12188192,0.004  
5,138.835,rs10434747,0.003  
5,138.851,rs1434660,0.002  
5,138.873,rs4976428,0.004  
5,138.877,rs2961639,0.006  
5,138.884,rs17171354,0.003  
5,138.897,rs1229742,0.001  
5,138.902,rs1229724,0.001  
5,138.907,rs6893152,0.000  
5,138.922,rs1544028,-0.000  
5,138.933,rs10058264,-0.000  
5,138.938,rs2189082,-0.000  
5,138.943,rs6878439,-0.000  
5,138.958,rs4371746,-0.000  
5,139.261,rs13159624,-0.000  
5,139.378,rs4835696,0.005  
5,139.380,rs7379760,0.005  
5,139.388,rs165193,0.000  
5,139.389,rs165195,0.000  
5,139.427,rs165185,0.001  
5,139.429,rs356478,0.007  
5,139.430,rs2336977,0.008  
5,139.441,rs2878853,0.013  
5,139.503,rs3777102,0.014  
5,139.527,rs4912936,0.004  
5,139.573,rs264347,0.007  
5,139.581,rs6891114,0.007  
5,139.593,rs265158,0.007  
5,139.604,rs7734418,0.006  
5,139.625,rs155939,0.006  
5,139.706,rs2436391,0.008  
5,140.345,rs10037757,-0.005  
5,140.541,rs155806,-0.012  
5,140.631,rs31746,-0.017  
5,140.678,rs415388,-0.021  
5,140.705,rs17208551,-0.020  
5,140.710,rs17097812,-0.020  
5,140.757,rs10063472,-0.016  
5,140.880,rs17097850,-0.013  
5,140.888,rs4141206,-0.013  
5,140.898,rs3861854,-0.013  
5,140.989,rs2434322,-0.015  
5,140.999,rs164078,-0.018  
5,141.013,rs6580209,-0.025  
5,141.039,rs164495,-0.026  
5,141.137,rs164080,-0.032  
5,141.149,rs6580215,-0.031  
5,141.174,rs163918,-0.029  
5,141.338,rs12655443,-0.011  
5,141.598,rs11738456,-0.002  
5,141.660,rs2906057,-0.001  
5,141.783,rs4912636,-0.000  
5,141.968,rs959662,0.001  
5,142.118,rs254441,0.004  
5,142.167,rs1864003,0.006  
5,142.321,rs4912639,0.010  
5,142.353,rs11167777,0.007  
5,142.382,rs10155516,0.009

5,142.442,rs249733,0.010  
5,142.594,rs17706715,0.004  
5,142.661,rs13179022,0.000  
5,142.667,rs34000,-0.001  
5,142.682,rs2299022,-0.001  
5,142.688,rs2282794,-0.001  
5,142.734,rs34016,-0.001  
5,142.751,rs10069453,-0.000  
5,142.759,rs249917,-0.000  
5,142.916,rs11167790,-0.002  
5,142.977,rs11750924,-0.003  
5,143.203,rs11167792,-0.005  
5,143.341,rs40127,-0.003  
5,143.396,rs463717,-0.003  
5,143.677,rs37195,-0.003  
5,143.796,rs3756387,-0.002  
5,143.897,rs3776331,-0.000  
5,144.097,rs3756374,0.005  
5,144.106,rs246599,0.007  
5,144.129,rs258799,0.004  
5,144.145,rs6887887,0.005  
5,144.197,rs6894946,0.008  
5,144.299,rs258820,0.004  
5,144.304,rs1438734,0.004  
5,144.332,rs154786,0.003  
5,144.434,rs244465,0.006  
5,144.647,rs6877893,0.016  
5,144.830,rs4607376,0.022  
5,145.053,rs4912922,0.025  
5,145.114,rs7700977,0.024  
5,145.341,rs152225,0.028  
5,145.444,rs6869733,0.029  
5,145.455,rs2910256,0.029  
5,145.565,rs7707734,0.026  
5,146.103,rs318373,0.016  
5,146.135,rs160790,0.016  
5,146.195,rs17369132,0.017  
5,146.224,rs3924119,0.018  
5,146.249,rs1862140,0.018  
5,146.376,rs723223,0.011  
5,146.515,rs165445,0.003  
5,146.656,rs2400170,0.003  
5,146.870,rs4509079,0.000  
5,146.903,rs1368434,0.000  
5,147.033,rs7734685,0.000  
5,147.191,rs10477291,0.004  
5,147.217,rs10053569,0.004  
5,147.225,rs2195929,0.005  
5,147.242,rs10037373,0.007  
5,147.246,rs7701544,0.006  
5,147.923,rs1201598,0.008  
5,148.040,rs13167316,0.001  
5,148.049,rs2116800,0.001  
5,148.079,rs17104645,0.001  
5,148.241,rs7709368,0.003  
5,148.456,rs2400228,0.002  
5,148.628,rs161041,0.001  
5,148.996,rs7713487,-0.000  
5,149.047,rs1383169,-0.000  
5,149.103,rs7723948,-0.001  
5,149.142,rs728937,-0.008

5,149.160,rs12659167,-0.008  
5,149.269,rs40474,-0.008  
5,149.280,rs40473,-0.007  
5,149.317,rs30983,-0.001  
5,149.395,rs891898,-0.003  
5,149.461,rs17468085,-0.004  
5,149.491,rs7724577,-0.005  
5,149.499,rs4705158,-0.005  
5,149.526,rs17547112,-0.010  
5,149.541,rs17547243,-0.010  
5,149.591,rs889829,-0.008  
5,149.903,rs7706630,-0.017  
5,149.986,rs2194156,-0.026  
5,150.004,rs10075595,-0.026  
5,150.030,rs17106906,-0.024  
5,150.035,rs2400440,-0.026  
5,150.086,rs6580511,-0.050  
5,150.166,rs7707803,-0.066  
5,150.301,rs2303067,-0.084  
5,150.436,rs7732604,-0.104  
5,150.466,rs12186491,-0.107  
5,150.821,rs17639006,-0.125  
5,150.837,rs4597955,-0.126  
5,150.955,rs13359903,-0.144  
5,151.020,rs4280857,-0.153  
5,151.035,rs7711800,-0.155  
5,151.228,rs2400642,-0.177  
5,151.273,rs2163752,-0.196  
5,151.313,rs9285673,-0.235  
5,151.348,rs877741,-0.239  
5,151.362,rs1042713,-0.260  
5,151.451,rs1864932,-0.306  
5,151.470,rs1181141,-0.318  
5,151.508,rs11740851,-0.337  
5,151.514,rs1029942,-0.338  
5,151.669,rs17109268,-0.372  
5,151.692,rs36077,-0.376  
5,151.862,rs9325132,-0.405  
5,151.968,rs748066,-0.422  
5,151.983,rs2289285,-0.436  
5,151.999,rs6887404,-0.449  
5,152.031,rs352360,-0.520  
5,152.063,rs352338,-0.548  
5,152.078,rs10079672,-0.549  
5,152.096,rs352336,-0.550  
5,152.184,rs353282,-0.518  
5,152.202,rs10515627,-0.445  
5,152.206,rs6887452,-0.437  
5,152.220,rs353286,-0.406  
5,152.259,rs403084,-0.483  
5,152.277,rs4705073,-0.482  
5,152.403,rs7719315,-0.419  
5,152.507,rs2400891,-0.398  
5,152.592,rs728837,-0.381  
5,152.733,rs11746690,-0.374  
5,152.758,rs6579757,-0.373  
5,152.788,rs4705382,-0.375  
5,152.823,rs32581,-0.373  
5,152.860,rs25846,-0.371  
5,152.870,rs30884,-0.370  
5,152.885,rs6864267,-0.364



5,153.017,rs245057,-0.248  
5,153.104,rs17655812,-0.209  
5,153.246,rs2569075,-0.188  
5,153.251,rs1986027,-0.188  
5,153.458,rs740750,-0.186  
5,153.686,rs2240784,-0.160  
5,153.687,rs13360134,-0.160  
5,153.708,rs2240785,-0.160  
5,153.739,rs2240795,-0.156  
5,153.822,rs919741,-0.149  
5,153.840,rs6869180,-0.149  
5,153.922,rs4958445,-0.177  
5,153.970,rs874083,-0.177  
5,154.026,rs919740,-0.177  
5,154.106,rs891943,-0.171  
5,154.155,rs891942,-0.164  
5,154.201,rs6579788,-0.190  
5,154.397,rs2748220,-0.193  
5,154.483,rs2288817,-0.177  
5,154.539,rs2569103,-0.167  
5,154.703,rs2983102,-0.170  
5,154.755,rs10061076,-0.164  
5,155.371,rs33409,-0.096  
5,155.677,rs2112637,-0.109  
5,156.106,rs2054440,-0.087  
5,156.147,rs8177435,-0.076  
5,156.207,rs871269,-0.090  
5,156.285,rs3762999,-0.090  
5,156.309,rs1465415,-0.087  
5,156.316,rs6896621,-0.087  
5,156.331,rs7724949,-0.085  
5,156.337,rs12651780,-0.084  
5,156.358,rs2303025,-0.087  
5,156.368,rs17728511,-0.083  
5,156.379,rs9324677,-0.080  
5,156.446,rs6897630,-0.071  
5,156.477,rs7717659,-0.067  
5,156.484,rs12518395,-0.064  
5,156.490,rs248426,-0.051  
5,156.525,rs248457,-0.061  
5,156.551,rs979455,-0.057  
5,156.637,rs152266,-0.028  
5,156.662,rs9324686,-0.023  
5,156.676,rs153445,-0.020  
5,156.678,rs7717132,-0.020  
5,156.704,rs12520516,-0.023  
5,156.841,rs1508770,-0.043  
5,157.054,rs4958272,-0.084  
5,157.063,rs11954054,-0.085  
5,157.083,rs357616,-0.086  
5,157.173,rs11750722,-0.086  
5,157.298,rs1432862,-0.115  
5,157.344,rs1368369,-0.143  
5,157.352,rs2278383,-0.138  
5,157.407,rs7706276,-0.111  
5,157.437,rs1036196,-0.106  
5,157.554,rs1545030,-0.091  
5,157.617,rs2011050,-0.090  
5,157.984,rs890832,-0.078  
5,158.103,rs170020,-0.073  
5,158.109,rs159922,-0.072

5,158.243,rs154689,-0.054  
5,158.276,rs294958,-0.054  
5,158.315,rs1422927,-0.050  
5,158.409,rs2016865,-0.039  
5,158.449,rs9324747,-0.060  
5,158.472,rs160063,-0.063  
5,158.502,rs2927585,-0.070  
5,158.506,rs1871164,-0.071  
5,158.643,rs509555,-0.070  
5,158.693,rs1353090,-0.063  
5,158.694,rs17114771,-0.063  
5,158.718,rs10515691,-0.060  
5,158.775,rs12658202,-0.037  
5,158.813,rs1422884,-0.041  
5,158.835,rs729329,-0.046  
5,158.892,rs13359392,-0.047  
5,159.113,rs1461234,-0.044  
5,159.141,rs2614125,-0.044  
5,159.210,rs286969,-0.045  
5,159.460,rs815611,-0.034  
5,159.506,rs153417,-0.026  
5,159.511,rs7711600,-0.025  
5,159.515,rs3886611,-0.026  
5,159.535,rs12520590,-0.026  
5,159.543,rs2161343,-0.028  
5,159.547,rs11745714,-0.030  
5,159.557,rs7244,-0.033  
5,159.565,rs10037670,-0.036  
5,159.601,rs6580083,-0.046  
5,159.606,rs283438,-0.046  
5,159.609,rs1842226,-0.047  
5,159.612,rs922535,-0.047  
5,159.618,rs6861375,-0.048  
5,159.621,rs283433,-0.048  
5,159.629,rs7703330,-0.048  
5,159.665,rs13184629,-0.048  
5,159.673,rs1824936,-0.049  
5,159.709,rs4958756,-0.061  
5,159.785,rs17615383,-0.073  
5,159.912,rs1390601,-0.095  
5,159.949,rs444984,-0.102  
5,159.956,rs1319694,-0.097  
5,159.974,rs6897414,-0.090  
5,159.987,rs7715630,-0.096  
5,160.022,rs1864125,-0.117  
5,160.037,rs2062400,-0.123  
5,160.057,rs12655293,-0.126  
5,160.070,rs4958401,-0.155  
5,160.112,rs245568,-0.169  
5,160.188,rs448373,-0.167  
5,160.286,rs4547967,-0.147  
5,160.315,rs4958416,-0.142  
5,160.329,rs1862147,-0.141  
5,160.334,rs11954814,-0.142  
5,160.534,rs244972,-0.209  
5,160.584,rs6894361,-0.227  
5,160.591,rs6556145,-0.230  
5,160.612,rs2310879,-0.235  
5,160.624,rs735331,-0.235  
5,160.661,rs3097811,-0.223  
5,160.679,rs6556352,-0.185

5,160.799,rs10075720,-0.149  
5,160.934,rs187495,-0.132  
5,160.955,rs6866397,-0.129  
5,160.959,rs10068407,-0.128  
5,161.060,rs7717533,-0.100  
5,161.126,rs157571,-0.092  
5,161.377,rs2279804,-0.076  
5,161.394,rs11134551,-0.076  
5,161.472,rs2436384,-0.070  
5,161.476,rs163433,-0.070  
5,161.491,rs3846684,-0.073  
5,161.492,rs2288502,-0.073  
5,161.525,rs727588,-0.075  
5,161.647,rs4704863,-0.039  
5,161.754,rs10063242,-0.036  
5,161.810,rs10045580,-0.027  
5,161.835,rs2270820,-0.023  
5,161.860,rs4704896,-0.023  
5,161.873,rs254682,-0.024  
5,161.930,rs10052561,-0.003  
5,161.934,rs1145608,-0.004  
5,161.939,rs1952663,-0.004  
5,161.941,rs2773218,-0.004  
5,161.942,rs10515763,-0.004  
5,161.944,rs10045385,-0.005  
5,161.951,rs11135035,-0.007  
5,161.963,rs972341,-0.010  
5,161.966,rs824854,-0.011  
5,161.972,rs7707243,-0.007  
5,161.973,rs17056109,-0.007  
5,162.070,rs1368298,-0.008  
5,162.374,rs10066782,-0.010  
5,162.386,rs4244439,-0.008  
5,162.412,rs13174549,-0.005  
5,162.430,rs929779,-0.003  
5,162.435,rs270661,-0.001  
5,162.798,rs2546890,-0.005  
5,162.949,rs17056747,-0.004  
5,162.981,rs10060059,-0.004  
5,162.989,rs1422882,-0.004  
5,163.019,rs6882695,-0.003  
5,163.023,rs17056764,-0.003  
5,163.067,rs10515794,-0.007  
5,163.123,rs11959288,-0.013  
5,163.211,rs6895787,-0.028  
5,163.387,rs11135072,-0.025  
5,163.420,rs12652868,-0.023  
5,163.462,rs1363659,-0.023  
5,163.555,rs1422847,-0.009  
5,163.583,rs365804,-0.009  
5,163.722,rs6881745,-0.004  
5,163.748,rs752438,-0.002  
5,163.758,rs31689,-0.001  
5,163.840,rs1025466,0.002  
5,163.889,rs6892282,0.001  
5,163.902,rs7718362,0.001  
5,163.944,rs952037,-0.000  
5,163.973,rs10053468,-0.000  
5,164.407,rs918480,-0.000  
5,164.443,rs2277955,-0.000  
5,164.494,rs10064968,-0.000

5,164.532,rs2303059,-0.001  
5,164.543,rs6899125,-0.001  
5,164.663,rs13185269,-0.003  
5,164.677,rs2961923,-0.002  
5,164.728,rs2961944,-0.001  
5,164.752,rs2909733,0.000  
5,164.753,rs2431099,0.000  
5,164.755,rs2431097,0.000  
5,164.783,rs1592752,0.001  
5,164.786,rs12654902,0.001  
5,164.792,rs6897982,0.002  
5,164.796,rs7717590,0.002  
5,164.881,rs10062528,0.003  
5,164.912,rs17058295,0.002  
5,164.914,rs6862853,0.002  
5,164.939,rs17058343,0.002  
5,164.967,rs1516651,0.002  
5,164.981,rs10051325,0.002  
5,164.996,rs1516655,0.001  
5,165.045,rs10053266,0.001  
5,165.047,rs6861122,0.001  
5,165.083,rs624722,0.000  
5,165.174,rs11949658,0.000  
5,165.254,rs2964773,-0.001  
5,165.285,rs4426954,-0.004  
5,165.333,rs11956866,-0.005  
5,165.343,rs6888242,-0.005  
5,165.482,rs9784608,-0.007  
5,165.552,rs17052610,-0.004  
5,165.652,rs2422102,-0.004  
5,165.666,rs209333,-0.004  
5,165.699,rs209353,-0.004  
5,165.778,rs399588,-0.001  
5,165.793,rs10491327,-0.002  
5,165.813,rs7720600,-0.002  
5,165.822,rs6879659,-0.002  
5,165.862,rs4601080,-0.002  
5,165.905,rs6863169,-0.007  
5,165.939,rs4244436,-0.014  
5,165.989,rs10042997,-0.021  
5,166.115,rs7711337,-0.023  
5,166.127,rs699096,-0.023  
5,166.182,rs3914991,-0.032  
5,166.259,rs7731154,-0.035  
5,166.382,rs828718,-0.039  
5,166.826,rs4074952,-0.050  
5,167.077,rs17061325,-0.056  
5,167.098,rs2913556,-0.056  
5,167.151,rs214115,-0.053  
5,167.224,rs13159031,-0.049  
5,167.251,rs182462,-0.049  
5,167.290,rs300211,-0.058  
5,167.343,rs410056,-0.060  
5,167.448,rs1946198,-0.094  
5,167.891,rs6893586,-0.130  
5,167.937,rs6875996,-0.144  
5,167.996,rs7447133,-0.160  
5,168.203,rs4868871,-0.170  
5,168.215,rs10042643,-0.170  
5,168.518,rs1030674,-0.168  
5,168.557,rs4357056,-0.171

5,168.564,rs17287615,-0.171  
5,168.577,rs4563644,-0.149  
5,168.646,rs4868875,-0.132  
5,168.667,rs3923169,-0.133  
5,168.767,rs11135312,-0.112  
5,168.850,rs13164902,-0.097  
5,169.121,rs10043454,-0.113  
5,169.188,rs4421125,-0.124  
5,169.224,rs7734804,-0.137  
5,169.333,rs7735043,-0.178  
5,169.440,rs1433001,-0.211  
5,169.524,rs1422686,-0.241  
5,169.542,rs3980160,-0.245  
5,169.568,rs10476513,-0.249  
5,169.617,rs2246518,-0.255  
5,169.647,rs11135373,-0.258  
5,169.676,rs9314075,-0.253  
5,169.718,rs1159244,-0.251  
5,169.839,rs1030154,-0.239  
5,169.841,rs10515901,-0.239  
5,169.881,rs262761,-0.232  
5,169.910,rs116953,-0.224  
5,170.007,rs262741,-0.207  
5,170.236,rs248274,-0.185  
5,170.327,rs26438,-0.183  
5,170.335,rs32720,-0.217  
5,170.367,rs26435,-0.258  
5,170.368,rs10475761,-0.258  
5,170.378,rs396769,-0.265  
5,170.427,rs26445,-0.290  
5,170.448,rs6873292,-0.301  
5,170.660,rs31736,-0.363  
5,170.670,rs10515916,-0.363  
5,170.724,rs17066274,-0.362  
5,170.929,rs830664,-0.343  
5,170.985,rs830678,-0.344  
5,171.051,rs2055354,-0.336  
5,171.155,rs2650084,-0.265  
5,171.226,rs13361834,-0.256  
5,171.325,rs1799550,-0.249  
5,171.397,rs350921,-0.257  
5,171.426,rs17066814,-0.256  
5,171.647,rs2961854,-0.246  
5,171.649,rs10516015,-0.247  
5,171.961,rs1349687,-0.290  
5,172.112,rs6555706,-0.274  
5,172.182,rs1422821,-0.271  
5,172.343,rs1432927,-0.305  
5,172.368,rs13157204,-0.311  
5,172.418,rs2161425,-0.316  
5,172.469,rs4145651,-0.357  
5,172.492,rs2161424,-0.378  
5,172.535,rs12520749,-0.396  
5,172.586,rs10072558,-0.407  
5,172.635,rs39956,-0.412  
5,172.641,rs3853242,-0.413  
5,172.695,rs1027635,-0.427  
5,173.151,rs7703323,-0.511  
5,173.204,rs10462888,-0.513  
5,173.428,rs7700378,-0.526  
5,173.459,rs7731005,-0.534

5,173.573,rs4868792,-0.577  
5,173.657,rs6883599,-0.575  
5,173.679,rs11739983,-0.574  
5,173.710,rs9313375,-0.529  
5,173.903,rs13156620,-0.536  
5,174.029,rs1025482,-0.585  
5,174.159,rs1025481,-0.541  
5,174.212,rs7715770,-0.536  
5,174.295,rs13153563,-0.526  
5,174.302,rs12515062,-0.529  
5,174.328,rs17068796,-0.540  
5,174.399,rs2336899,-0.565  
5,174.407,rs279389,-0.569  
5,174.533,rs279403,-0.616  
5,174.791,rs1477284,-0.631  
5,174.907,rs39950,-0.615  
5,174.987,rs1422931,-0.661  
5,174.995,rs2617984,-0.662  
5,175.127,rs247995,-0.660  
5,175.140,rs247999,-0.659  
5,175.145,rs6555782,-0.661  
5,175.159,rs248003,-0.663  
5,175.257,rs1077046,-0.640  
5,175.355,rs1036193,-0.741  
5,175.393,rs4976582,-0.750  
5,175.473,rs4976585,-0.737  
5,175.476,rs3733985,-0.814  
5,175.515,rs1960425,-0.826  
5,175.576,rs11748886,-0.845  
5,175.650,rs2112556,-0.864  
5,175.670,rs11949188,-0.855  
5,175.704,rs17731499,-0.911  
5,175.788,rs4976598,-0.893  
5,175.800,rs4320284,-0.890  
5,175.829,rs6555807,-0.870  
5,175.881,rs4976606,-0.796  
5,175.897,rs4976608,-0.797  
5,175.927,rs1009069,-0.798  
5,176.252,rs158910,-0.827  
5,176.277,rs10052805,-0.836  
5,176.321,rs12519740,-0.851  
5,176.520,rs6890724,-0.934  
5,176.527,rs7728435,-0.937  
5,176.553,rs10036727,-0.918  
5,176.568,rs11742226,-0.903  
5,176.593,rs4867902,-0.913  
5,176.600,rs17733068,-0.933  
5,176.626,rs4298263,-1.001  
5,176.642,rs4867939,-1.028  
5,176.660,rs17070509,-1.041  
5,176.701,rs12691283,-1.042  
5,176.828,rs6555833,-1.114  
5,176.842,rs17635646,-1.072  
5,176.898,rs1466947,-1.066  
5,176.936,rs2938772,-0.994  
5,176.994,rs11134544,-0.990  
5,177.000,rs7714853,-0.989  
5,177.126,rs1432910,-0.969  
5,177.150,rs9313435,-0.961  
5,177.358,rs11747642,-0.889  
5,177.563,rs6890327,-0.881

5,177.607,rs10516055,-0.880  
5,177.888,rs10054190,-0.872  
5,177.910,rs296006,-0.871  
5,177.928,rs10067964,-0.874  
5,177.939,rs295996,-0.881  
5,177.977,rs188431,-0.867  
5,177.989,rs10071654,-0.815  
5,177.992,rs12654605,-0.816  
5,178.029,rs4868327,-0.833  
5,178.084,rs12515660,-0.857  
5,178.123,rs6867453,-0.860  
5,178.171,rs10038332,-0.847  
5,178.179,rs1421764,-0.900  
5,178.196,rs11134564,-0.890  
5,178.272,rs6883683,-0.846  
5,178.314,rs1001869,-0.867  
5,178.406,rs17071195,-0.990  
5,178.440,rs6898594,-1.082  
5,178.445,rs731398,-1.080  
5,178.539,rs255740,-1.062  
5,178.725,rs17668965,-1.213  
5,178.806,rs169082,-1.278  
5,178.842,rs7713640,-1.308  
5,178.876,rs3734099,-1.328  
5,179.078,rs9313473,-1.426  
5,179.250,rs261625,-1.414  
5,179.277,rs17646113,-1.389  
5,179.418,rs6879439,-1.258  
5,179.574,rs10475927,-1.138  
5,179.578,rs17071888,-1.137  
5,179.587,rs259903,-1.135  
5,179.661,rs1422692,-1.134  
5,179.723,rs1363576,-1.129  
5,179.729,rs6893165,-1.130  
5,179.862,rs4867922,-0.964  
5,180.071,rs4634366,-0.890  
5,180.223,rs2287744,-0.829  
5,180.257,rs10044209,-0.830  
5,180.361,rs11743438,-0.876  
5,180.436,rs17072371,-0.891  
5,180.574,rs315717,-0.916  
5,180.633,rs315751,-0.981  
5,180.733,rs315721,-1.067  
5,180.764,rs17072430,-1.071  
5,180.791,rs3761749,-1.073  
5,180.845,rs315791,-1.066  
5,180.886,rs315796,-1.049  
5,181.002,rs7725699,-1.006  
5,181.214,rs314155,-0.985  
5,181.260,rs314111,-1.005  
5,181.275,rs827778,-0.999  
5,181.300,rs9313503,-0.987  
5,181.334,rs314137,-0.983  
5,181.533,rs13156152,-0.906  
5,181.576,rs6877607,-0.901  
5,181.612,rs959461,-0.891  
5,181.799,rs10039039,-0.799  
5,181.837,rs6878302,-0.786  
5,181.857,rs1035414,-0.787  
5,181.871,rs1978440,-0.782  
5,181.903,rs933656,-0.728

5,181.937,rs10475944,-0.729  
5,182.027,rs6555903,-0.730  
5,182.157,rs9313511,-0.716  
5,182.483,rs1875978,-0.763  
5,182.532,rs905823,-0.763  
5,182.728,rs12189366,-0.812  
5,182.736,rs10475947,-0.814  
5,182.763,rs11747249,-0.821  
5,182.783,rs4868012,-0.820  
5,182.802,rs6897199,-0.865  
5,182.815,rs2202440,-0.975  
5,182.885,rs7701794,-0.980  
5,182.893,rs12514867,-1.002  
5,182.922,rs732157,-1.080  
5,183.314,rs10516077,-1.104  
5,183.398,rs10074614,-1.090  
5,183.538,rs6555940,-1.026  
5,183.573,rs17680768,-1.008  
5,183.599,rs17748299,-0.995  
5,183.637,rs4559013,-0.974  
5,183.690,rs3097846,-0.926  
5,183.691,rs1545033,-0.926  
5,183.702,rs11745375,-0.932  
5,183.706,rs4868093,-0.842  
5,183.710,rs3097838,-0.805  
5,183.720,rs891971,-0.799  
5,183.749,rs891981,-0.765  
5,183.763,rs891980,-0.746  
5,183.773,rs11134701,-0.732  
5,183.814,rs11134705,-0.663  
5,183.844,rs1382901,-0.606  
5,183.850,rs745443,-0.595  
5,183.859,rs10039848,-0.583  
5,183.863,rs257363,-0.585  
5,183.881,rs7708413,-0.592  
5,183.882,rs10516086,-0.591  
5,183.908,rs26408,-0.595  
5,183.915,rs6879367,-0.615  
5,183.919,rs931117,-0.626  
5,183.921,rs33874,-0.630  
5,183.923,rs11134715,-0.636  
5,183.944,rs11134717,-0.645  
5,183.978,rs171718,-0.651  
5,184.096,rs153741,-0.693  
5,184.098,rs249516,-0.695  
5,184.202,rs10463010,-0.836  
5,184.218,rs7712491,-0.880  
5,184.226,rs17074035,-0.899  
5,184.250,rs1529702,-0.945  
5,184.280,rs702097,-0.978  
5,184.879,rs10035578,-0.742  
5,184.927,rs3812023,-0.768  
5,184.983,rs11741056,-0.770  
5,185.084,rs3111491,-0.808  
5,185.175,rs3776754,-0.833  
5,185.276,rs2172048,-0.826  
5,185.339,rs17074413,-0.833  
5,185.407,rs6876038,-0.839  
5,185.693,rs7715800,-0.774  
5,185.924,rs2731729,-0.746  
5,185.991,rs10077377,-0.749



5,186.124,rs6865951,-0.755  
5,186.143,rs2569248,-0.755  
5,186.185,rs10042482,-0.678  
5,186.258,rs11745941,-0.660  
5,186.394,rs1541918,-0.679  
5,186.410,rs7442753,-0.672  
5,186.460,rs10059684,-0.649  
5,186.505,rs10043108,-0.648  
5,186.521,rs714715,-0.648  
5,186.576,rs931802,-0.646  
5,186.592,rs4867681,-0.665  
5,186.613,rs3964610,-0.688  
5,186.701,rs7730108,-0.698  
5,186.764,rs10035202,-0.684  
5,186.806,rs1027745,-0.688  
5,186.903,rs172860,-0.677  
5,187.021,rs2161375,-0.710  
5,187.184,rs10057387,-0.749  
5,187.189,rs6877686,-0.751  
5,187.245,rs6870663,-0.755  
5,187.300,rs751988,-0.806  
5,187.353,rs13186108,-0.852  
5,187.379,rs4868226,-0.839  
5,187.443,rs498221,-0.865  
5,187.472,rs472959,-0.848  
5,187.536,rs481221,-0.874  
5,187.552,rs485710,-0.925  
5,187.714,rs2004997,-0.974  
5,187.735,rs6895379,-0.918  
5,187.916,rs7719172,-0.889  
5,187.964,rs10054054,-0.885  
5,188.284,rs3805463,-0.861  
5,188.350,rs255313,-0.856  
5,188.496,rs703752,-0.935  
5,188.543,rs6873973,-0.992  
5,188.555,rs4867697,-1.117  
5,188.556,rs10476070,-1.132  
5,188.561,rs10072402,-1.106  
5,188.565,rs6884482,-1.082  
5,188.592,rs3132145,-1.101  
5,188.697,rs10073580,-0.972  
5,188.730,rs874719,-1.002  
5,188.762,rs3756530,-1.024  
5,188.771,rs4868257,-1.033  
5,188.786,rs3797456,-1.038  
5,188.821,rs7730758,-1.048  
5,188.840,rs921004,-1.049  
5,188.921,rs1000939,-1.063  
5,188.940,rs6884147,-1.070  
5,189.121,rs6878606,-0.973  
5,189.139,rs2112618,-0.965  
5,189.238,rs750168,-0.914  
5,189.404,rs10076027,-0.826  
5,189.415,rs11954373,-0.825  
5,189.550,rs17076110,-0.822  
5,189.570,rs746214,-0.822  
5,190.361,rs703724,-0.784  
5,190.441,rs10074473,-0.793  
5,190.540,rs10064888,-0.794  
5,190.750,rs791385,-0.714  
5,190.769,rs17076407,-0.729

5,190.784,rs13164950,-0.755  
5,190.805,rs16821,-0.792  
5,190.806,rs9313655,-0.792  
5,190.826,rs791371,-0.797  
5,190.869,rs2659186,-0.824  
5,190.901,rs359457,-0.813  
5,191.048,rs6875935,-0.761  
5,191.082,rs11744584,-0.763  
5,191.086,rs7703555,-0.763  
5,191.636,rs11739519,-0.728  
5,191.684,rs7712944,-0.723  
5,191.694,rs2546999,-0.721  
5,191.868,rs10516111,-0.662  
5,191.912,rs871503,-0.652  
5,191.999,rs7705993,-0.540  
5,192.011,rs7711162,-0.525  
5,192.047,rs11952072,-0.514  
5,192.278,rs2082381,-0.426  
5,192.445,rs6894337,-0.373  
5,192.470,rs2936995,-0.367  
5,192.535,rs2937000,-0.363  
5,192.554,rs2964083,-0.362  
5,192.599,rs2162728,-0.347  
5,192.637,rs753829,-0.362  
5,192.678,rs962880,-0.332  
5,192.686,rs1875190,-0.330  
5,192.719,rs2909716,-0.327  
5,192.835,rs11134841,-0.285  
5,192.865,rs890755,-0.277  
5,192.974,rs703739,-0.286  
5,193.040,rs10516124,-0.296  
5,193.075,rs7725112,-0.307  
5,193.091,rs12516352,-0.310  
5,193.104,rs13179274,-0.313  
5,193.131,rs12515393,-0.307  
5,193.226,rs4868438,-0.278  
5,193.260,rs13170111,-0.292  
5,193.379,rs4868442,-0.339  
5,193.400,rs7733337,-0.331  
5,193.445,rs1125813,-0.312  
5,193.566,rs6871270,-0.270  
5,193.613,rs6556165,-0.274  
5,193.741,rs2431160,-0.248  
5,193.818,rs17798338,-0.301  
5,193.827,rs10038452,-0.306  
5,193.866,rs4868473,-0.322  
5,193.905,rs10052925,-0.339  
5,193.911,rs1862158,-0.349  
5,193.913,rs10516123,-0.349  
5,193.925,rs981359,-0.337  
5,193.941,rs12522449,-0.326  
5,193.984,rs2135053,-0.316  
5,193.994,rs10072136,-0.281  
5,194.005,rs10214323,-0.308  
5,194.007,rs11953826,-0.311  
5,194.031,rs6894193,-0.296  
5,194.081,rs949637,-0.265  
5,194.135,rs6871049,-0.242  
5,194.219,rs750494,-0.214  
5,194.260,rs695221,-0.199  
5,194.282,rs6863550,-0.203

5,194.334,rs1422919,-0.186  
5,194.339,rs6898421,-0.185  
5,194.360,rs1549221,-0.204  
5,194.390,rs12657640,-0.210  
5,194.491,rs13185639,-0.231  
5,194.548,rs2471015,-0.242  
5,194.561,rs966775,-0.241  
5,194.568,rs4424010,-0.236  
5,194.604,rs4868517,-0.206  
5,194.650,rs2431135,-0.174  
5,194.702,rs265984,-0.191  
5,194.723,rs265993,-0.216  
5,194.739,rs266004,-0.211  
5,194.751,rs265974,-0.210  
5,194.813,rs1496133,-0.205  
5,194.862,rs267382,-0.184  
5,195.001,rs10044281,-0.103  
5,195.018,rs200461,-0.097  
5,195.024,rs2940479,-0.095  
5,195.076,rs870258,-0.123  
5,195.078,rs2913217,-0.121  
5,195.135,rs17572757,-0.075  
5,195.146,rs2937448,-0.071  
5,195.156,rs590774,-0.070  
5,195.201,rs6864183,-0.062  
5,195.266,rs13356830,-0.062  
5,195.415,rs2382072,-0.068  
5,195.417,rs4868534,-0.067  
5,195.524,rs1560036,-0.054  
5,195.617,rs4867809,-0.059  
5,196.205,rs2334965,-0.042  
5,196.568,rs10214381,-0.034  
5,196.855,rs4868644,-0.031  
5,197.091,rs11134988,-0.029  
5,197.148,rs4868689,-0.029  
5,197.170,rs1487802,-0.029  
5,197.216,rs9686813,-0.036  
5,197.264,rs4867858,-0.038  
5,197.299,rs2962783,-0.040  
5,197.453,rs692825,-0.059  
5,197.553,rs3736432,-0.072  
5,197.559,rs4976661,-0.072  
5,197.570,rs691057,-0.073  
5,197.691,rs365132,-0.060  
5,197.948,rs451643,-0.058  
5,198.355,rs3088050,-0.042  
5,198.377,rs6885410,-0.041  
5,198.442,rs4075958,-0.040  
5,198.593,rs2544809,-0.037  
5,198.827,rs13169820,-0.034  
5,198.835,rs7727897,-0.034  
5,199.154,rs4958955,-0.022  
5,199.350,rs4292462,-0.021  
5,199.356,rs6896573,-0.025  
5,199.365,rs9329125,-0.029  
5,199.397,rs4072924,-0.027  
5,199.501,rs10066995,-0.030  
5,199.534,rs12515321,-0.028  
5,199.553,rs4380683,-0.028  
5,199.574,rs6881402,-0.028  
5,199.840,rs17080239,-0.005

5,199.907,rs7733159,-0.002  
5,199.939,rs1059367,-0.003  
5,199.942,rs2913751,-0.003  
5,199.945,rs2913750,-0.003  
5,200.029,rs1544926,-0.009  
5,200.278,rs11745722,-0.010  
5,200.299,rs11958296,-0.016  
5,200.300,rs930054,-0.016  
5,200.444,rs13178731,-0.008  
5,200.453,rs2973737,-0.008  
5,200.824,rs489777,-0.011  
5,200.843,rs4976733,-0.011  
5,200.850,rs535858,-0.011  
5,201.013,rs775700,-0.029  
5,201.109,rs4413550,-0.039  
5,201.141,rs12523265,-0.041  
5,201.258,rs12522503,-0.042  
5,201.276,rs6898275,-0.041  
5,201.403,rs7710807,-0.040  
5,201.422,rs11949276,-0.041  
5,201.468,rs10455076,-0.044  
5,201.607,rs13174784,-0.039  
5,201.614,rs6871932,-0.039  
5,201.622,rs7708351,-0.040  
5,201.689,rs6870926,-0.051  
5,201.764,rs953741,-0.047  
5,201.850,rs13362387,-0.045  
5,202.006,rs2078183,-0.048  
5,202.332,rs6860046,-0.054  
5,202.382,rs11746863,-0.048  
5,202.443,rs7735461,-0.048  
5,202.465,rs6862563,-0.045  
5,202.491,rs252070,-0.038  
5,202.499,rs9329070,-0.034  
5,202.515,rs2279979,-0.028  
5,202.528,rs11746118,-0.023  
5,202.536,rs252064,-0.021  
5,202.542,rs398829,-0.029  
5,202.562,rs464156,-0.018  
5,202.605,rs456909,-0.017  
5,202.615,rs469568,-0.018  
5,202.705,rs901253,-0.024  
5,202.762,rs166031,-0.022  
5,202.804,rs878932,-0.012  
5,202.837,rs422172,-0.015  
5,202.914,rs255022,-0.011  
5,202.997,rs555864,-0.012  
5,203.032,rs7731436,-0.012  
5,203.112,rs11249626,-0.019  
5,203.127,rs4701113,-0.019  
5,203.226,rs7726821,-0.033  
5,203.258,rs7735038,-0.042  
5,203.274,rs11249631,-0.046  
5,203.312,rs9329079,-0.041  
5,203.409,rs7733389,-0.036  
5,203.540,rs4701137,-0.045  
5,203.713,rs4331859,-0.054  
5,203.833,rs10516146,-0.056  
5,204.001,rs30386,-0.047  
5,204.106,rs17616317,-0.046  
5,204.137,rs2162760,-0.045

5,204.143,rs248221,-0.045  
5,204.150,rs17079868,-0.045  
5,204.333,rs4282280,-0.036  
5,204.345,rs10061906,-0.030  
5,204.370,rs4624755,-0.029  
5,204.419,rs4700718,-0.035  
5,204.446,rs1867457,-0.043  
5,204.454,rs11749727,-0.045  
5,204.461,rs4367258,-0.047  
5,204.479,rs4700914,-0.051  
5,204.577,rs4362908,-0.053  
5,204.591,rs11249687,-0.051  
5,204.689,rs729652,-0.041  
5,204.722,rs7707082,-0.047  
5,204.789,rs10041598,-0.062  
5,204.802,rs918481,-0.063  
5,204.824,rs7712252,-0.070  
5,204.856,rs7733582,-0.081  
5,204.875,rs9329110,-0.089  
5,204.967,rs6893735,-0.098  
5,204.975,rs6886960,-0.080  
5,205.110,rs10059433,-0.079  
5,205.210,rs11957360,-0.078  
5,205.265,rs400330,-0.082  
5,205.283,rs3797104,-0.084  
5,205.307,rs4700745,-0.086  
5,205.328,rs307805,-0.086  
5,205.396,rs11249743,-0.080  
5,205.484,rs10479581,-0.072  
5,205.485,rs17080555,-0.072  
5,205.580,rs7726005,-0.083  
5,205.593,rs655601,-0.079  
5,205.627,rs1872183,-0.070  
5,205.698,rs2619756,-0.075  
5,205.999,rs11249756,-0.084  
5,206.070,rs1579303,-0.072  
5,206.083,rs7379313,-0.080  
5,206.094,rs13167249,-0.088  
5,206.105,rs13358985,-0.086  
5,206.152,rs7379517,-0.076  
5,206.176,rs1363537,-0.072  
5,206.226,rs7380309,-0.068  
5,206.282,rs1592937,-0.088  
5,206.418,rs1279912,-0.081  
6,0.005,rs2788245,-0.135  
6,0.071,rs9392857,-0.163  
6,0.233,rs9505192,-0.180  
6,0.657,rs11753072,-0.201  
6,0.679,rs11754896,-0.206  
6,0.750,rs12207278,-0.220  
6,0.782,rs6922858,-0.227  
6,0.792,rs9393002,-0.227  
6,0.796,rs2756318,-0.227  
6,0.945,rs9379231,-0.228  
6,0.977,rs9505514,-0.228  
6,1.165,rs723106,-0.241  
6,1.518,rs10793858,-0.266  
6,1.550,rs845880,-0.265  
6,1.701,rs6925338,-0.294  
6,1.739,rs9505667,-0.332  
6,1.742,rs11966212,-0.305

6,1.885,rs7747742,-0.308  
6,1.998,rs2050158,-0.331  
6,2.085,rs1997773,-0.368  
6,2.247,rs9502839,-0.437  
6,2.279,rs7454978,-0.443  
6,2.508,rs9378280,-0.418  
6,2.520,rs164255,-0.419  
6,2.697,rs238035,-0.423  
6,2.728,rs12526976,-0.424  
6,2.844,rs238074,-0.394  
6,2.891,rs2008503,-0.392  
6,2.937,rs2459602,-0.375  
6,3.041,rs1437282,-0.310  
6,3.113,rs6596805,-0.295  
6,3.338,rs7739076,-0.297  
6,3.427,rs9392279,-0.355  
6,3.533,rs1737753,-0.428  
6,3.638,rs1878475,-0.462  
6,3.741,rs746095,-0.460  
6,3.870,rs1737786,-0.443  
6,4.010,rs932410,-0.411  
6,4.172,rs6927891,-0.357  
6,4.265,rs4146690,-0.350  
6,4.312,rs10900909,-0.311  
6,4.324,rs7763653,-0.311  
6,4.342,rs9392301,-0.305  
6,4.459,rs2569865,-0.276  
6,4.466,rs6937266,-0.275  
6,4.563,rs2317966,-0.274  
6,4.640,rs2816221,-0.266  
6,4.644,rs910016,-0.271  
6,4.648,rs7772118,-0.289  
6,4.662,rs742554,-0.368  
6,4.678,rs2249437,-0.384  
6,4.686,rs2745580,-0.347  
6,4.699,rs2745593,-0.366  
6,4.710,rs2235718,-0.349  
6,4.759,rs2012025,-0.311  
6,4.919,rs4461777,-0.319  
6,4.941,rs11968464,-0.348  
6,4.968,rs9503013,-0.385  
6,4.972,rs9405506,-0.391  
6,4.972,rs12197419,-0.391  
6,5.016,rs9378310,-0.370  
6,5.040,rs12189843,-0.383  
6,5.103,rs10484696,-0.393  
6,5.116,rs6926560,-0.396  
6,5.137,rs1040532,-0.413  
6,5.161,rs3823271,-0.400  
6,5.166,rs6919059,-0.396  
6,5.248,rs226468,-0.411  
6,5.270,rs1157673,-0.411  
6,5.272,rs6596856,-0.411  
6,5.292,rs3778533,-0.404  
6,5.296,rs3800086,-0.404  
6,5.360,rs3800101,-0.396  
6,5.484,rs3800128,-0.379  
6,5.694,rs10223785,-0.326  
6,5.695,rs7755470,-0.356  
6,5.757,rs6596867,-0.338  
6,6.041,rs7768483,-0.314

6,6.712,rs9503168,-0.245  
6,6.771,rs9501834,-0.254  
6,6.856,rs6940091,-0.269  
6,6.932,rs17135104,-0.285  
6,6.982,rs10046356,-0.289  
6,7.041,rs1994124,-0.289  
6,7.167,rs1680870,-0.302  
6,7.175,rs4959190,-0.299  
6,7.207,rs2794553,-0.285  
6,7.298,rs6918808,-0.236  
6,7.448,rs6904200,-0.210  
6,7.462,rs9378725,-0.210  
6,7.607,rs4246059,-0.216  
6,7.628,rs9503288,-0.218  
6,7.641,rs4382335,-0.222  
6,7.650,rs11759003,-0.219  
6,7.760,rs460677,-0.210  
6,7.870,rs316365,-0.220  
6,7.872,rs10793840,-0.221  
6,7.874,rs9503309,-0.239  
6,7.874,rs316364,-0.243  
6,7.875,rs316362,-0.277  
6,7.904,rs405616,-0.316  
6,8.018,rs318477,-0.374  
6,8.023,rs9392442,-0.366  
6,8.046,rs17135958,-0.353  
6,8.082,rs318497,-0.366  
6,8.090,rs7759176,-0.370  
6,8.146,rs4959217,-0.383  
6,8.232,rs7743193,-0.400  
6,8.285,rs1054132,-0.319  
6,8.411,rs1040521,-0.283  
6,8.504,rs2326173,-0.307  
6,8.579,rs10498658,-0.326  
6,8.797,rs4448134,-0.342  
6,8.844,rs9405622,-0.327  
6,8.918,rs9503480,-0.363  
6,8.955,rs6596957,-0.381  
6,8.992,rs13193012,-0.398  
6,9.076,rs4305775,-0.414  
6,9.116,rs9405629,-0.422  
6,9.127,rs9378784,-0.429  
6,9.191,rs6917161,-0.384  
6,9.224,rs1887843,-0.375  
6,9.349,rs9392489,-0.340  
6,9.366,rs4959824,-0.335  
6,9.371,rs10498662,-0.333  
6,9.453,rs6921583,-0.333  
6,9.568,rs748842,-0.305  
6,9.643,rs4959847,-0.306  
6,9.713,rs9503618,-0.313  
6,9.788,rs875085,-0.287  
6,9.790,rs878803,-0.288  
6,9.818,rs6902488,-0.289  
6,9.836,rs9503635,-0.290  
6,9.961,rs6904497,-0.305  
6,10.117,rs226930,-0.325  
6,10.149,rs9392005,-0.393  
6,10.236,rs12526106,-0.385  
6,10.334,rs12208688,-0.324  
6,10.418,rs9378385,-0.324

6,10.490,rs10498664,-0.345  
6,10.525,rs2496388,-0.382  
6,10.537,rs2490050,-0.394  
6,10.596,rs11242890,-0.356  
6,10.624,rs4959884,-0.358  
6,10.758,rs9405676,-0.288  
6,10.785,rs9502099,-0.238  
6,10.840,rs9392025,-0.207  
6,10.885,rs6597023,-0.212  
6,10.917,rs6938648,-0.209  
6,11.044,rs12198921,-0.257  
6,11.269,rs9503936,-0.271  
6,11.289,rs6935622,-0.272  
6,11.300,rs2025267,-0.273  
6,11.332,rs1999022,-0.320  
6,11.385,rs1887574,-0.356  
6,11.496,rs811226,-0.362  
6,11.563,rs4959949,-0.352  
6,11.591,rs168126,-0.345  
6,11.605,rs885185,-0.342  
6,11.610,rs9502175,-0.310  
6,11.868,rs1265235,-0.338  
6,12.002,rs403026,-0.408  
6,12.172,rs12206701,-0.475  
6,12.178,rs714112,-0.478  
6,12.268,rs9504181,-0.577  
6,12.278,rs393587,-0.588  
6,12.340,rs9504197,-0.636  
6,12.370,rs2875955,-0.634  
6,12.424,rs1849564,-0.668  
6,12.511,rs6920511,-0.740  
6,12.519,rs1040045,-0.793  
6,12.558,rs4502986,-0.838  
6,12.827,rs6926191,-0.873  
6,12.828,rs12198622,-0.873  
6,12.888,rs9504281,-0.880  
6,12.962,rs9405785,-0.888  
6,13.026,rs7738117,-0.836  
6,13.053,rs7768378,-0.797  
6,13.076,rs6907963,-0.764  
6,13.129,rs2764176,-0.744  
6,13.322,rs11964945,-0.692  
6,13.493,rs464681,-0.652  
6,13.601,rs6917225,-0.638  
6,13.606,rs2746242,-0.638  
6,13.656,rs10458086,-0.636  
6,13.990,rs6924717,-0.600  
6,13.995,rs9405818,-0.639  
6,14.141,rs797126,-0.660  
6,14.186,rs2432749,-0.628  
6,14.219,rs2432794,-0.638  
6,14.234,rs2432785,-0.646  
6,14.394,rs9405834,-0.724  
6,14.401,rs9405270,-0.720  
6,14.421,rs2503800,-0.705  
6,14.433,rs760612,-0.698  
6,14.440,rs433295,-0.694  
6,14.458,rs2503801,-0.730  
6,14.459,rs191833,-0.678  
6,14.483,rs574716,-0.690  
6,14.569,rs9405273,-0.701



6,14.624,rs2326613,-0.716  
6,14.640,rs6937827,-0.678  
6,14.665,rs7746509,-0.683  
6,14.694,rs17140870,-0.686  
6,14.788,rs941427,-0.661  
6,14.798,rs2018284,-0.656  
6,14.868,rs12525101,-0.639  
6,14.904,rs9328324,-0.673  
6,14.917,rs765878,-0.670  
6,15.019,rs12215495,-0.626  
6,15.065,rs1977058,-0.624  
6,15.094,rs7741438,-0.617  
6,15.180,rs7766672,-0.594  
6,15.273,rs582186,-0.495  
6,15.297,rs4960155,-0.462  
6,15.321,rs667875,-0.458  
6,15.462,rs1905214,-0.388  
6,15.497,rs17141697,-0.382  
6,15.631,rs7772158,-0.383  
6,15.691,rs6911594,-0.362  
6,15.698,rs440330,-0.363  
6,15.724,rs407447,-0.367  
6,15.725,rs11969912,-0.367  
6,15.727,rs3778354,-0.365  
6,15.802,rs2085575,-0.307  
6,15.909,rs1267843,-0.273  
6,16.005,rs9502429,-0.324  
6,16.030,rs9504743,-0.324  
6,16.076,rs2755416,-0.374  
6,16.089,rs11243078,-0.359  
6,16.128,rs1318606,-0.317  
6,16.223,rs1902946,-0.307  
6,16.305,rs9328361,-0.308  
6,16.332,rs4455715,-0.312  
6,16.440,rs1761928,-0.319  
6,16.449,rs7772062,-0.319  
6,16.499,rs11963226,-0.320  
6,16.591,rs6929885,-0.322  
6,16.620,rs6919894,-0.322  
6,16.656,rs849057,-0.327  
6,16.877,rs9504848,-0.326  
6,16.971,rs9328376,-0.327  
6,16.979,rs9328377,-0.346  
6,17.052,rs2294461,-0.384  
6,17.078,rs3804474,-0.394  
6,17.098,rs17142392,-0.395  
6,17.112,rs7739053,-0.395  
6,17.201,rs760893,-0.401  
6,17.238,rs201016,-0.399  
6,17.292,rs3761986,-0.387  
6,17.407,rs201039,-0.330  
6,17.444,rs201053,-0.310  
6,17.526,rs1294433,-0.337  
6,17.586,rs2876028,-0.355  
6,17.689,rs1892462,-0.331  
6,17.748,rs6927306,-0.332  
6,17.790,rs4530912,-0.312  
6,17.849,rs13215298,-0.288  
6,17.884,rs1286037,-0.251  
6,18.014,rs1887510,-0.231  
6,18.029,rs2182802,-0.233

6,18.134,rs6908529,-0.255  
6,18.154,rs2768999,-0.245  
6,18.221,rs2768990,-0.213  
6,18.255,rs2765353,-0.223  
6,18.278,rs1892512,-0.230  
6,18.282,rs6597241,-0.232  
6,18.287,rs2765366,-0.232  
6,18.293,rs12206270,-0.232  
6,18.300,rs6921610,-0.232  
6,18.328,rs490213,-0.235  
6,18.390,rs9505022,-0.243  
6,18.560,rs6906505,-0.279  
6,18.613,rs11965592,-0.282  
6,18.626,rs2842363,-0.283  
6,18.676,rs3778333,-0.283  
6,19.194,rs2806192,-0.282  
6,19.240,rs4959442,-0.298  
6,19.287,rs13191992,-0.315  
6,19.316,rs1322219,-0.339  
6,19.361,rs2076295,-0.348  
6,19.384,rs2295859,-0.350  
6,19.395,rs2076299,-0.350  
6,19.425,rs2806222,-0.344  
6,19.484,rs9379120,-0.326  
6,19.571,rs12197234,-0.338  
6,19.637,rs6927500,-0.372  
6,19.698,rs270406,-0.401  
6,19.736,rs270404,-0.409  
6,19.797,rs9379137,-0.440  
6,20.034,rs3812162,-0.501  
6,20.052,rs365936,-0.436  
6,20.143,rs1150893,-0.512  
6,20.317,rs2815155,-0.434  
6,20.393,rs4401711,-0.414  
6,20.422,rs9378524,-0.407  
6,20.501,rs6924013,-0.390  
6,20.530,rs491511,-0.391  
6,20.591,rs9392980,-0.358  
6,20.657,rs9502704,-0.293  
6,20.702,rs2817084,-0.263  
6,20.766,rs9393004,-0.249  
6,20.769,rs10484750,-0.248  
6,20.785,rs1199389,-0.245  
6,21.269,rs12184061,-0.143  
6,21.288,rs4326271,-0.141  
6,21.307,rs4960464,-0.118  
6,21.316,rs4566922,-0.125  
6,21.348,rs9378578,-0.154  
6,21.410,rs13211231,-0.209  
6,21.461,rs9502754,-0.230  
6,21.489,rs742301,-0.241  
6,21.539,rs382854,-0.249  
6,21.639,rs2057512,-0.167  
6,21.713,rs9406234,-0.186  
6,22.052,rs9379412,-0.276  
6,22.068,rs7756320,-0.275  
6,22.310,rs16892185,-0.261  
6,22.412,rs742513,-0.252  
6,22.442,rs9369355,-0.250  
6,22.468,rs1001384,-0.248  
6,22.484,rs12194169,-0.249

6,22.832,rs1328140,-0.218  
6,22.950,rs1410364,-0.218  
6,23.051,rs2223236,-0.220  
6,23.111,rs4716001,-0.200  
6,23.152,rs1934775,-0.227  
6,23.227,rs9396671,-0.218  
6,23.316,rs9396715,-0.223  
6,23.334,rs10807600,-0.224  
6,23.474,rs201260,-0.225  
6,23.558,rs1883408,-0.202  
6,23.561,rs7341284,-0.207  
6,23.583,rs855395,-0.244  
6,23.601,rs9477691,-0.237  
6,23.660,rs9371078,-0.211  
6,23.677,rs13209414,-0.206  
6,23.681,rs957610,-0.205  
6,23.690,rs7755414,-0.204  
6,23.702,rs1207005,-0.203  
6,23.706,rs4716310,-0.205  
6,23.708,rs1889211,-0.206  
6,23.708,rs1207009,-0.206  
6,23.791,rs12193757,-0.160  
6,23.843,rs6935000,-0.147  
6,23.845,rs9358225,-0.148  
6,23.860,rs1999565,-0.153  
6,23.906,rs9368113,-0.153  
6,24.006,rs12526330,-0.168  
6,24.044,rs6456333,-0.159  
6,24.133,rs7764232,-0.138  
6,24.174,rs8180539,-0.141  
6,24.301,rs10484886,-0.157  
6,24.360,rs537112,-0.173  
6,24.380,rs3798696,-0.178  
6,24.521,rs501436,-0.178  
6,24.590,rs6905006,-0.160  
6,24.672,rs560194,-0.155  
6,24.837,rs17576994,-0.142  
6,24.870,rs7764197,-0.125  
6,24.895,rs4449626,-0.131  
6,24.937,rs4712802,-0.136  
6,25.176,rs570023,-0.154  
6,25.392,rs3846839,-0.146  
6,25.526,rs6456746,-0.112  
6,25.533,rs2153157,-0.114  
6,25.561,rs4711127,-0.132  
6,25.594,rs4713064,-0.133  
6,25.691,rs7774711,-0.137  
6,25.813,rs16870891,-0.139  
6,26.236,rs10947009,-0.141  
6,26.271,rs3734404,-0.143  
6,26.281,rs2018334,-0.142  
6,26.350,rs6908326,-0.153  
6,26.368,rs6457200,-0.158  
6,26.441,rs7748486,-0.185  
6,26.445,rs2327394,-0.186  
6,26.528,rs9791189,-0.174  
6,26.548,rs7738900,-0.193  
6,26.565,rs2064112,-0.239  
6,26.640,rs7741863,-0.202  
6,26.813,rs9461735,-0.156  
6,26.916,rs7770004,-0.164

6,27.131,rs10947419,-0.198  
6,27.233,rs9469705,-0.213  
6,27.254,rs821437,-0.215  
6,27.260,rs548304,-0.216  
6,27.323,rs1206002,-0.231  
6,27.381,rs9469853,-0.235  
6,27.431,rs9348953,-0.239  
6,27.431,rs210920,-0.238  
6,27.483,rs9296142,-0.225  
6,27.568,rs9470042,-0.201  
6,27.571,rs760788,-0.201  
6,27.581,rs9380521,-0.199  
6,27.608,rs9368883,-0.192  
6,27.624,rs4713922,-0.187  
6,27.724,rs10947590,-0.168  
6,27.805,rs6457927,-0.131  
6,27.879,rs6937349,-0.119  
6,27.892,rs17406952,-0.117  
6,28.175,rs2327506,-0.125  
6,28.205,rs12234132,-0.125  
6,28.209,rs9470843,-0.124  
6,28.312,rs10947756,-0.139  
6,28.338,rs9380781,-0.138  
6,28.394,rs2228220,-0.132  
6,28.536,rs11755555,-0.140  
6,28.631,rs2327538,-0.145  
6,28.745,rs521824,-0.172  
6,28.798,rs5370,-0.158  
6,28.875,rs4379286,-0.131  
6,28.945,rs6925906,-0.099  
6,28.963,rs4714469,-0.090  
6,28.988,rs9462724,-0.086  
6,29.081,rs9471712,-0.073  
6,29.109,rs9381141,-0.080  
6,29.303,rs9369394,-0.119  
6,29.314,rs2095343,-0.119  
6,29.435,rs9369414,-0.109  
6,29.474,rs16873023,-0.106  
6,29.594,rs472072,-0.096  
6,29.719,rs7745298,-0.113  
6,29.794,rs560810,-0.116  
6,30.070,rs3945322,-0.139  
6,30.180,rs1332844,-0.140  
6,30.448,rs1223517,-0.167  
6,30.462,rs9296614,-0.169  
6,30.490,rs1223552,-0.173  
6,30.540,rs1008461,-0.168  
6,30.568,rs6927426,-0.157  
6,30.660,rs2458304,-0.116  
6,30.688,rs6919374,-0.105  
6,30.716,rs517803,-0.093  
6,30.735,rs4715248,-0.090  
6,30.803,rs551499,-0.048  
6,30.811,rs7775293,-0.045  
6,30.842,rs2115063,-0.033  
6,30.960,rs4712047,-0.006  
6,30.971,rs2841523,-0.004  
6,31.022,rs412970,-0.000  
6,31.039,rs1573701,0.000  
6,31.054,rs3734671,0.000  
6,31.057,rs4715568,0.000

6,31.080,rs9647614,0.000  
6,31.085,rs12662217,-0.000  
6,31.121,rs280143,-0.005  
6,31.159,rs10484348,-0.005  
6,31.163,rs9367805,-0.001  
6,31.197,rs9476476,-0.001  
6,31.238,rs2013807,-0.002  
6,31.265,rs12177758,-0.001  
6,31.315,rs9885921,-0.001  
6,31.588,rs2094923,-0.000  
6,31.660,rs7752155,0.000  
6,31.767,rs13201062,0.000  
6,32.029,rs9349942,0.000  
6,32.324,rs1267480,-0.000  
6,32.549,rs857477,-0.001  
6,32.600,rs857424,-0.002  
6,32.687,rs7764728,-0.005  
6,32.695,rs707821,-0.005  
6,32.834,rs764650,-0.016  
6,32.839,rs1267505,-0.016  
6,32.982,rs2472796,-0.022  
6,33.016,rs2472802,-0.023  
6,33.099,rs768543,-0.021  
6,33.114,rs233504,-0.021  
6,33.142,rs233494,-0.020  
6,33.618,rs9383032,-0.007  
6,34.390,rs6915344,-0.020  
6,34.630,rs6922136,-0.021  
6,34.670,rs2237113,-0.021  
6,34.672,rs2282815,-0.021  
6,34.791,rs6930152,-0.019  
6,34.798,rs2619514,-0.019  
6,34.818,rs6913914,-0.020  
6,34.826,rs741111,-0.029  
6,34.831,rs9383079,-0.029  
6,34.855,rs220938,-0.030  
6,34.900,rs6932716,-0.029  
6,34.979,rs727295,-0.031  
6,34.993,rs7767544,-0.032  
6,35.047,rs6459448,-0.031  
6,35.232,rs2038037,-0.026  
6,35.462,rs4716059,-0.031  
6,35.489,rs16885,-0.032  
6,35.512,rs179996,-0.032  
6,35.559,rs9383153,-0.032  
6,35.619,rs9396666,-0.032  
6,35.667,rs9396669,-0.029  
6,35.669,rs3819400,-0.029  
6,35.688,rs404143,-0.051  
6,35.731,rs932411,-0.053  
6,35.756,rs1015568,-0.052  
6,35.930,rs981459,-0.034  
6,35.971,rs12204397,-0.032  
6,35.973,rs9350008,-0.032  
6,35.998,rs235158,-0.036  
6,36.049,rs16878314,-0.047  
6,36.069,rs3817837,-0.051  
6,36.080,rs9477153,-0.051  
6,36.157,rs9350009,-0.047  
6,36.196,rs2237182,-0.044  
6,36.220,rs11756866,-0.044

6,36.267,rs721010,-0.054  
6,36.403,rs742328,-0.042  
6,36.545,rs2237166,-0.047  
6,36.659,rs3812192,-0.049  
6,36.691,rs6903850,-0.048  
6,36.743,rs3812205,-0.045  
6,36.765,rs531089,-0.045  
6,36.908,rs493352,-0.050  
6,36.917,rs3806152,-0.052  
6,36.940,rs10456790,-0.057  
6,37.031,rs528785,-0.079  
6,37.123,rs10949381,-0.106  
6,37.141,rs685183,-0.105  
6,37.182,rs1240808,-0.100  
6,37.446,rs1473730,-0.110  
6,37.452,rs9383214,-0.111  
6,37.488,rs7763768,-0.134  
6,37.697,rs9383219,-0.134  
6,37.816,rs11753264,-0.139  
6,37.922,rs9396742,-0.137  
6,37.979,rs4360123,-0.136  
6,38.006,rs6926443,-0.131  
6,38.015,rs4716108,-0.128  
6,38.076,rs1535546,-0.089  
6,38.140,rs6459529,-0.052  
6,38.209,rs12216482,-0.046  
6,38.214,rs12526082,-0.045  
6,38.263,rs7773313,-0.036  
6,38.295,rs10485376,-0.031  
6,38.312,rs3777686,-0.028  
6,38.397,rs9465047,-0.027  
6,38.402,rs10807614,-0.027  
6,38.528,rs9350051,-0.039  
6,38.531,rs3777712,-0.039  
6,38.730,rs2038743,-0.037  
6,38.794,rs9396802,-0.035  
6,38.794,rs11756169,-0.027  
6,38.795,rs12197692,-0.027  
6,39.038,rs760849,-0.021  
6,39.255,rs1569542,-0.024  
6,39.319,rs10807621,-0.027  
6,39.447,rs9358148,-0.043  
6,39.452,rs12194394,-0.043  
6,39.474,rs12524744,-0.042  
6,39.524,rs2842938,-0.041  
6,39.653,rs214590,-0.025  
6,39.925,rs9297068,-0.023  
6,40.088,rs10949509,-0.013  
6,40.119,rs13196052,-0.013  
6,40.334,rs1983569,-0.011  
6,40.339,rs6925505,-0.011  
6,40.498,rs1998416,-0.006  
6,40.527,rs1418968,-0.006  
6,40.708,rs13196368,-0.012  
6,40.901,rs9368038,-0.028  
6,40.922,rs1858504,-0.021  
6,40.987,rs9295427,-0.028  
6,41.055,rs1463780,-0.046  
6,41.079,rs1495982,-0.052  
6,41.128,rs4560636,-0.067  
6,41.135,rs9295438,-0.071

6,41.200,rs4712415,-0.105  
6,41.230,rs9465438,-0.106  
6,41.231,rs10484720,-0.106  
6,41.233,rs760669,-0.106  
6,41.237,rs1883233,-0.107  
6,41.241,rs2179176,-0.107  
6,41.258,rs2743610,-0.114  
6,41.330,rs2031255,-0.145  
6,41.333,rs1033872,-0.146  
6,41.394,rs1209816,-0.149  
6,41.404,rs7766034,-0.150  
6,41.470,rs973244,-0.147  
6,41.471,rs6926229,-0.149  
6,41.482,rs1047033,-0.150  
6,41.496,rs742227,-0.155  
6,41.499,rs9366320,-0.159  
6,41.517,rs7772056,-0.171  
6,41.528,rs7769434,-0.185  
6,41.554,rs10456227,-0.177  
6,41.565,rs1202292,-0.174  
6,41.589,rs2782187,-0.168  
6,41.597,rs16883016,-0.166  
6,41.603,rs517374,-0.170  
6,41.614,rs17560881,-0.181  
6,41.622,rs9350204,-0.189  
6,41.644,rs7763815,-0.187  
6,41.712,rs9348410,-0.244  
6,41.723,rs2457334,-0.216  
6,41.724,rs1555004,-0.194  
6,41.738,rs2472756,-0.184  
6,41.763,rs2483767,-0.200  
6,41.835,rs2457322,-0.200  
6,41.970,rs9358309,-0.152  
6,41.982,rs6907076,-0.141  
6,41.995,rs4712463,-0.128  
6,42.010,rs1536581,-0.114  
6,42.094,rs717208,-0.080  
6,42.095,rs6940079,-0.080  
6,42.121,rs7746765,-0.081  
6,42.128,rs4712465,-0.080  
6,42.469,rs9350245,-0.061  
6,42.539,rs1570155,-0.053  
6,42.638,rs911361,-0.050  
6,42.647,rs746720,-0.050  
6,42.753,rs9295468,-0.054  
6,42.832,rs7747931,-0.067  
6,42.853,rs761154,-0.071  
6,42.922,rs2206740,-0.077  
6,42.956,rs6928012,-0.080  
6,43.030,rs4077405,-0.077  
6,43.075,rs4712573,-0.086  
6,43.078,rs6913817,-0.086  
6,43.133,rs4323302,-0.109  
6,43.357,rs10214694,-0.179  
6,43.364,rs9358401,-0.181  
6,43.394,rs6937811,-0.167  
6,43.397,rs10806933,-0.168  
6,43.402,rs12202180,-0.169  
6,43.436,rs1459046,-0.176  
6,43.517,rs807850,-0.191  
6,43.574,rs12191693,-0.155

6,43.574,rs2064301,-0.155  
6,43.609,rs6456421,-0.129  
6,43.661,rs9466097,-0.122  
6,43.681,rs4236005,-0.103  
6,43.812,rs1744885,-0.085  
6,43.826,rs6918842,-0.080  
6,43.834,rs4712626,-0.078  
6,43.872,rs1322884,-0.069  
6,43.969,rs2094571,-0.055  
6,44.076,rs952579,-0.036  
6,44.209,rs12207699,-0.026  
6,44.270,rs6927510,-0.024  
6,44.323,rs1928176,-0.023  
6,44.361,rs6922362,-0.013  
6,44.475,rs9350407,-0.002  
6,44.498,rs7744710,-0.001  
6,44.526,rs1207774,-0.000  
6,44.548,rs1736512,0.000  
6,44.602,rs9366426,0.004  
6,44.617,rs9295533,0.005  
6,44.751,rs10484386,0.012  
6,44.780,rs4712653,0.013  
6,44.851,rs10498705,0.015  
6,45.217,rs9358504,0.010  
6,45.241,rs7739417,0.010  
6,45.260,rs7751843,0.015  
6,45.263,rs7749084,0.015  
6,45.477,rs2066266,0.010  
6,45.518,rs849874,0.009  
6,45.642,rs9358533,0.006  
6,45.703,rs1205896,0.006  
6,45.835,rs719332,0.016  
6,45.900,rs6933317,0.020  
6,46.052,rs2328715,0.028  
6,46.052,rs6456494,0.028  
6,46.056,rs6903615,0.028  
6,46.067,rs4286772,0.023  
6,46.083,rs4077636,0.015  
6,46.112,rs6933879,0.014  
6,46.143,rs1107271,0.011  
6,46.173,rs1928078,0.008  
6,46.252,rs2498259,0.001  
6,46.338,rs12663119,-0.001  
6,46.351,rs4639331,-0.001  
6,46.354,rs9379482,-0.002  
6,46.374,rs4452636,-0.005  
6,46.375,rs4236026,-0.005  
6,46.376,rs6906444,-0.005  
6,46.401,rs9393387,-0.005  
6,46.414,rs7751597,-0.004  
6,46.452,rs6918629,-0.000  
6,46.455,rs1925458,0.000  
6,46.457,rs9393409,0.000  
6,46.470,rs7775425,0.000  
6,46.516,rs199032,0.003  
6,46.532,rs955978,0.002  
6,46.582,rs10456274,0.000  
6,46.626,rs199055,0.000  
6,46.658,rs16887636,-0.000  
6,46.845,rs197988,-0.003  
6,46.849,rs6934968,-0.002



6,46.860,rs197999,-0.002  
6,46.892,rs9466869,-0.003  
6,46.986,rs503082,-0.007  
6,47.153,rs9393495,-0.036  
6,47.184,rs12214182,-0.032  
6,47.213,rs9466975,-0.052  
6,47.222,rs474833,-0.054  
6,47.228,rs9393510,-0.054  
6,47.256,rs499466,-0.049  
6,47.286,rs1511479,-0.044  
6,47.296,rs1511481,-0.046  
6,47.299,rs17529740,-0.048  
6,47.303,rs16888503,-0.048  
6,47.469,rs9467041,-0.073  
6,47.482,rs9379643,-0.081  
6,47.486,rs6922632,-0.081  
6,47.508,rs1277149,-0.080  
6,47.569,rs10946675,-0.078  
6,47.760,rs1770909,-0.070  
6,48.014,rs2744591,-0.106  
6,48.149,rs2817239,-0.118  
6,48.162,rs2760181,-0.118  
6,48.196,rs12213545,-0.119  
6,48.208,rs2817198,-0.119  
6,48.224,rs6902039,-0.140  
6,48.235,rs5026394,-0.139  
6,48.339,rs3087943,-0.123  
6,48.411,rs1885211,-0.113  
6,48.462,rs9379687,-0.117  
6,48.470,rs2145753,-0.118  
6,48.631,rs9358803,-0.129  
6,48.662,rs4712860,-0.131  
6,48.858,rs680009,-0.157  
6,48.913,rs127489,-0.140  
6,49.111,rs6918101,-0.145  
6,49.143,rs303031,-0.142  
6,49.517,rs916539,-0.104  
6,49.534,rs6941417,-0.103  
6,49.549,rs9358839,-0.108  
6,49.568,rs2328869,-0.116  
6,49.573,rs1880269,-0.118  
6,49.587,rs10080837,-0.118  
6,49.591,rs2690106,-0.116  
6,49.610,rs9379751,-0.129  
6,49.636,rs2206194,-0.129  
6,49.640,rs6456672,-0.128  
6,49.651,rs10456044,-0.127  
6,49.674,rs6912426,-0.108  
6,49.682,rs12213948,-0.101  
6,49.700,rs6456683,-0.099  
6,49.705,rs301396,-0.100  
6,49.750,rs441460,-0.111  
6,49.789,rs1980449,-0.122  
6,49.801,rs9461190,-0.125  
6,49.824,rs16890972,-0.130  
6,49.901,rs2051541,-0.149  
6,49.962,rs198828,-0.163  
6,50.007,rs6913828,-0.169  
6,50.035,rs3778279,-0.172  
6,50.099,rs3736781,-0.185  
6,50.287,rs13194491,-0.207

6, 50.369, rs7771953, -0.205  
6, 50.437, rs16867808, -0.239  
6, 50.443, rs2205829, -0.242  
6, 50.525, rs4713119, -0.248  
6, 50.535, rs6915101, -0.248  
6, 50.890, rs9468254, -0.272  
6, 50.962, rs17404424, -0.276  
6, 50.973, rs238872, -0.277  
6, 50.974, rs9393956, -0.305  
6, 50.976, rs1419633, -0.301  
6, 50.993, rs969931, -0.272  
6, 50.997, rs2745412, -0.269  
6, 50.997, rs2272991, -0.268  
6, 51.000, rs1233391, -0.265  
6, 51.004, rs29230, -0.266  
6, 51.024, rs1737078, -0.233  
6, 51.054, rs2523946, -0.249  
6, 51.055, rs2394255, -0.248  
6, 51.073, rs2523990, -0.245  
6, 51.086, rs2844776, -0.234  
6, 51.088, rs1345229, -0.232  
6, 51.111, rs3132622, -0.191  
6, 51.153, rs1075496, -0.170  
6, 51.161, rs12210092, -0.171  
6, 51.167, rs3131043, -0.173  
6, 51.172, rs4713391, -0.173  
6, 51.174, rs3095352, -0.162  
6, 51.187, rs2844651, -0.173  
6, 51.190, rs11753326, -0.175  
6, 51.193, rs2844680, -0.176  
6, 51.199, rs7758976, -0.156  
6, 51.200, rs2523898, -0.154  
6, 51.200, rs2523897, -0.154  
6, 51.216, rs1265086, -0.174  
6, 51.218, rs3130453, -0.174  
6, 51.233, rs2524099, -0.197  
6, 51.238, rs9366778, -0.196  
6, 51.245, rs2156875, -0.196  
6, 51.245, rs2523608, -0.196  
6, 51.249, rs4713462, -0.208  
6, 51.254, rs2844513, -0.250  
6, 51.260, rs2284178, -0.232  
6, 51.267, rs2844498, -0.233  
6, 51.272, rs2071593, -0.227  
6, 51.276, rs3093662, -0.221  
6, 51.277, rs2256965, -0.220  
6, 51.284, rs2261033, -0.163  
6, 51.285, rs1077393, -0.162  
6, 51.375, rs9267665, -0.185  
6, 51.424, rs429608, -0.202  
6, 51.426, rs492899, -0.202  
6, 51.597, rs408359, -0.224  
6, 51.622, rs2071277, -0.225  
6, 51.639, rs2267644, -0.224  
6, 51.654, rs9267947, -0.223  
6, 51.656, rs17576984, -0.223  
6, 51.792, rs9405098, -0.228  
6, 51.817, rs3129882, -0.227  
6, 51.819, rs2239804, -0.228  
6, 51.955, rs532098, -0.245  
6, 52.026, rs6457617, -0.253

6,52.039,rs3129727,-0.255  
6,52.041,rs9275601,-0.255  
6,52.041,rs3873444,-0.229  
6,52.067,rs2071800,-0.260  
6,52.074,rs10807113,-0.268  
6,52.122,rs2070121,-0.262  
6,52.125,rs2857107,-0.261  
6,52.128,rs9784758,-0.259  
6,52.136,rs241436,-0.287  
6,52.141,rs3819715,-0.282  
6,52.141,rs241424,-0.282  
6,52.189,rs241407,-0.250  
6,52.204,rs154981,-0.240  
6,52.214,rs9296059,-0.224  
6,52.220,rs3129299,-0.213  
6,52.223,rs171329,-0.208  
6,52.270,rs9500927,-0.191  
6,52.279,rs453779,-0.185  
6,52.288,rs423639,-0.186  
6,52.295,rs6920606,-0.187  
6,52.300,rs9277052,-0.187  
6,52.323,rs9277341,-0.197  
6,52.362,rs3117008,-0.189  
6,52.364,rs2294478,-0.188  
6,52.380,rs756441,-0.188  
6,52.473,rs456261,-0.210  
6,52.629,rs210179,-0.210  
6,52.666,rs210134,-0.221  
6,52.675,rs394199,-0.228  
6,52.724,rs4259245,-0.326  
6,52.729,rs1536036,-0.332  
6,52.740,rs4713653,-0.296  
6,52.749,rs3818528,-0.304  
6,52.764,rs4711369,-0.343  
6,52.838,rs7772005,-0.347  
6,52.897,rs2495971,-0.349  
6,53.005,rs2499766,-0.368  
6,53.036,rs2495990,-0.340  
6,53.310,rs1873250,-0.297  
6,53.609,rs9469718,-0.349  
6,53.659,rs2499730,-0.358  
6,54.169,rs206937,-0.327  
6,54.571,rs4713808,-0.330  
6,54.670,rs3798544,-0.316  
6,54.699,rs10947510,-0.313  
6,54.902,rs3823438,-0.299  
6,55.008,rs732594,-0.305  
6,55.076,rs9658119,-0.305  
6,55.101,rs7757405,-0.306  
6,55.155,rs7757037,-0.269  
6,55.185,rs1475774,-0.280  
6,55.232,rs2766559,-0.297  
6,55.262,rs2859418,-0.306  
6,55.265,rs17704843,-0.306  
6,55.309,rs651158,-0.299  
6,55.316,rs2295852,-0.296  
6,55.355,rs851019,-0.281  
6,55.359,rs7770710,-0.280  
6,55.412,rs9394333,-0.265  
6,55.447,rs4713942,-0.270  
6,55.448,rs7775107,-0.271

6,55.448,rs4713944,-0.272  
6,55.456,rs12665222,-0.285  
6,55.465,rs732394,-0.280  
6,55.466,rs4713955,-0.281  
6,55.468,rs12662591,-0.278  
6,55.474,rs763018,-0.271  
6,55.479,rs11965340,-0.275  
6,55.485,rs16888069,-0.279  
6,55.486,rs2269563,-0.280  
6,55.497,rs2071797,-0.292  
6,55.509,rs7747099,-0.302  
6,55.657,rs853884,-0.233  
6,55.905,rs9462209,-0.135  
6,55.907,rs10807170,-0.134  
6,56.034,rs7763347,-0.172  
6,56.063,rs236434,-0.177  
6,56.086,rs4714010,-0.182  
6,56.087,rs16889125,-0.182  
6,56.095,rs958423,-0.184  
6,56.111,rs110033,-0.218  
6,56.126,rs236374,-0.233  
6,56.134,rs236358,-0.207  
6,56.244,rs1405069,-0.230  
6,56.275,rs12524778,-0.233  
6,56.290,rs831513,-0.239  
6,56.315,rs6457967,-0.255  
6,56.315,rs831481,-0.255  
6,56.371,rs7758789,-0.238  
6,56.406,rs9380645,-0.247  
6,56.418,rs262902,-0.275  
6,56.458,rs900002,-0.275  
6,56.483,rs2776800,-0.250  
6,56.579,rs9394429,-0.223  
6,56.579,rs195403,-0.223  
6,56.627,rs2284923,-0.216  
6,56.638,rs195434,-0.214  
6,56.760,rs10498738,-0.229  
6,56.765,rs17636617,-0.236  
6,56.772,rs12211948,-0.248  
6,56.779,rs6457993,-0.240  
6,56.788,rs1891611,-0.219  
6,56.795,rs928349,-0.224  
6,56.811,rs1738457,-0.226  
6,56.812,rs6925759,-0.225  
6,56.828,rs7773994,-0.215  
6,56.833,rs9357249,-0.161  
6,56.840,rs4714084,-0.171  
6,56.853,rs6926735,-0.174  
6,56.859,rs10947686,-0.184  
6,56.878,rs6922589,-0.189  
6,56.910,rs6938061,-0.191  
6,56.919,rs742787,-0.195  
6,56.931,rs4565301,-0.187  
6,57.028,rs7776025,-0.162  
6,57.029,rs2842518,-0.162  
6,57.091,rs12194275,-0.154  
6,57.133,rs7742915,-0.143  
6,57.158,rs12526152,-0.151  
6,57.169,rs12191476,-0.155  
6,57.181,rs9470850,-0.161  
6,57.314,rs6904723,-0.189

6,57.337,rs4316001,-0.193  
6,57.341,rs9369064,-0.218  
6,57.344,rs7740763,-0.219  
6,57.371,rs6931131,-0.234  
6,57.472,rs6932648,-0.303  
6,57.500,rs1623375,-0.313  
6,57.560,rs1738220,-0.301  
6,57.615,rs862435,-0.303  
6,57.633,rs6458085,-0.279  
6,57.687,rs1412266,-0.283  
6,57.706,rs2281345,-0.295  
6,57.713,rs1332010,-0.298  
6,57.744,rs2235868,-0.330  
6,57.751,rs2206942,-0.342  
6,57.782,rs9470970,-0.437  
6,57.785,rs6905394,-0.447  
6,57.809,rs10947785,-0.459  
6,57.876,rs1978609,-0.517  
6,57.917,rs751933,-0.532  
6,58.112,rs1651106,-0.606  
6,58.196,rs2395718,-0.602  
6,58.453,rs9394587,-0.640  
6,58.621,rs2466405,-0.597  
6,58.652,rs10498743,-0.586  
6,58.717,rs302572,-0.561  
6,58.826,rs303648,-0.524  
6,58.882,rs302603,-0.519  
6,58.976,rs1318002,-0.513  
6,59.020,rs13212273,-0.493  
6,59.104,rs3003946,-0.487  
6,59.116,rs7771410,-0.481  
6,59.260,rs9462589,-0.424  
6,59.579,rs7750979,-0.434  
6,59.652,rs3846892,-0.426  
6,59.815,rs9394679,-0.384  
6,59.842,rs4714329,-0.380  
6,59.932,rs966082,-0.381  
6,59.937,rs1886753,-0.381  
6,59.996,rs3734557,-0.368  
6,60.052,rs13196792,-0.371  
6,60.078,rs4714346,-0.355  
6,60.102,rs1347257,-0.370  
6,60.153,rs9394699,-0.387  
6,60.224,rs909988,-0.414  
6,60.277,rs432959,-0.442  
6,60.422,rs9367063,-0.474  
6,60.450,rs7765378,-0.470  
6,60.475,rs6939085,-0.448  
6,60.535,rs6931798,-0.393  
6,60.581,rs7773686,-0.392  
6,60.704,rs7767835,-0.380  
6,60.752,rs10738088,-0.386  
6,60.799,rs6907181,-0.373  
6,60.894,rs914509,-0.320  
6,60.945,rs2395760,-0.325  
6,61.002,rs7739373,-0.331  
6,61.021,rs6907756,-0.334  
6,61.364,rs7748777,-0.402  
6,61.494,rs2395767,-0.361  
6,61.553,rs16894387,-0.364  
6,61.567,rs6458211,-0.365

6,61.617,rs629832,-0.365  
6,61.621,rs6458214,-0.365  
6,61.646,rs2236369,-0.353  
6,61.678,rs6922617,-0.368  
6,61.687,rs7768605,-0.358  
6,61.713,rs1535582,-0.322  
6,61.715,rs728488,-0.324  
6,61.747,rs628134,-0.334  
6,61.774,rs9381065,-0.305  
6,61.799,rs2496635,-0.290  
6,61.808,rs6937336,-0.304  
6,61.809,rs728826,-0.307  
6,61.823,rs2496637,-0.293  
6,61.831,rs2495235,-0.266  
6,61.839,rs6907558,-0.235  
6,61.847,rs2495232,-0.239  
6,61.930,rs2496652,-0.275  
6,62.298,rs9381084,-0.243  
6,62.516,rs16894871,-0.189  
6,62.570,rs4714501,-0.179  
6,62.580,rs2230088,-0.189  
6,62.590,rs2143678,-0.204  
6,62.612,rs1474761,-0.213  
6,62.647,rs4714503,-0.212  
6,62.677,rs6458234,-0.211  
6,62.703,rs1011101,-0.210  
6,62.733,rs9349199,-0.210  
6,62.947,rs13202921,-0.210  
6,63.117,rs6912200,-0.211  
6,63.540,rs2249703,-0.207  
6,63.735,rs12110546,-0.198  
6,63.818,rs6921368,-0.195  
6,63.842,rs9369325,-0.195  
6,63.870,rs4554318,-0.167  
6,63.912,rs12194513,-0.152  
6,63.916,rs7763360,-0.148  
6,63.931,rs6906808,-0.138  
6,63.953,rs7749023,-0.097  
6,63.974,rs9394865,-0.089  
6,63.992,rs9462772,-0.084  
6,64.015,rs9471779,-0.076  
6,64.017,rs4714572,-0.061  
6,64.031,rs2492942,-0.067  
6,64.062,rs2236046,-0.057  
6,64.182,rs7755400,-0.026  
6,64.241,rs17704222,-0.034  
6,64.323,rs4714598,-0.041  
6,64.431,rs599088,-0.046  
6,64.469,rs1038890,-0.044  
6,64.532,rs694148,-0.043  
6,64.593,rs2016352,-0.037  
6,64.959,rs375435,-0.013  
6,64.975,rs9471904,-0.013  
6,64.986,rs2268684,-0.013  
6,65.088,rs9381218,-0.007  
6,65.195,rs12529592,-0.010  
6,65.228,rs6936589,-0.009  
6,65.230,rs9381223,-0.009  
6,65.353,rs2234185,-0.007  
6,65.811,rs17209372,-0.003  
6,65.841,rs2651195,-0.002

6,65.998,rs11965886,-0.002  
6,66.184,rs2185631,-0.003  
6,66.217,rs1674870,-0.000  
6,66.522,rs16869037,-0.002  
6,66.522,rs6908311,-0.002  
6,66.553,rs1761769,-0.002  
6,66.609,rs7749629,-0.009  
6,66.613,rs945131,-0.009  
6,66.663,rs3025010,-0.006  
6,66.691,rs1358980,-0.008  
6,66.700,rs943084,-0.010  
6,66.709,rs4507587,-0.011  
6,66.746,rs9381257,-0.007  
6,66.766,rs9369426,-0.005  
6,66.776,rs1536304,-0.006  
6,66.784,rs1326142,-0.006  
6,66.801,rs11968561,-0.005  
6,66.803,rs9369430,-0.005  
6,66.869,rs9381262,-0.007  
6,66.894,rs1776721,-0.003  
6,66.909,rs833621,-0.005  
6,66.962,rs9472173,-0.014  
6,66.969,rs7755431,-0.004  
6,66.976,rs4714724,-0.001  
6,67.054,rs6907643,-0.003  
6,67.082,rs910603,-0.005  
6,67.103,rs9472201,-0.008  
6,67.111,rs9462957,-0.009  
6,67.161,rs4714738,-0.008  
6,67.192,rs877111,-0.006  
6,67.293,rs9369461,-0.025  
6,67.303,rs6925778,-0.025  
6,67.342,rs9369465,-0.022  
6,67.400,rs666462,-0.024  
6,67.443,rs730775,-0.035  
6,67.512,rs7740535,-0.047  
6,67.524,rs4714776,-0.049  
6,67.529,rs2396242,-0.049  
6,67.690,rs13198841,-0.037  
6,67.722,rs10484624,-0.039  
6,67.754,rs543844,-0.040  
6,67.779,rs9395021,-0.041  
6,67.798,rs7759209,-0.049  
6,67.831,rs9296440,-0.072  
6,67.866,rs9381336,-0.071  
6,67.881,rs9462996,-0.071  
6,67.896,rs1040939,-0.070  
6,67.916,rs9472301,-0.069  
6,67.931,rs9367205,-0.068  
6,67.969,rs326815,-0.064  
6,68.014,rs6913259,-0.068  
6,68.110,rs660953,-0.065  
6,68.151,rs227813,-0.066  
6,68.504,rs508494,-0.066  
6,68.815,rs9296451,-0.064  
6,68.944,rs927657,-0.057  
6,69.282,rs16873396,-0.025  
6,69.400,rs12665622,-0.031  
6,69.522,rs485817,-0.026  
6,69.536,rs1928532,-0.018  
6,69.802,rs2039541,-0.015

6,69.838,rs829911,-0.017  
6,69.867,rs1449648,-0.018  
6,69.931,rs4714874,-0.029  
6,69.999,rs1375702,-0.035  
6,70.098,rs6458478,-0.037  
6,70.105,rs3777543,-0.037  
6,70.125,rs2396578,-0.037  
6,70.217,rs3777594,-0.045  
6,70.271,rs3777601,-0.040  
6,70.468,rs1209198,-0.035  
6,70.517,rs946223,-0.036  
6,70.576,rs2185108,-0.033  
6,70.733,rs6458491,-0.027  
6,70.838,rs10807337,-0.023  
6,70.866,rs6458495,-0.024  
6,70.933,rs7744272,-0.036  
6,71.023,rs12528557,-0.039  
6,71.689,rs876121,-0.025  
6,71.933,rs806506,-0.036  
6,72.047,rs2206926,-0.034  
6,72.100,rs3799873,-0.033  
6,72.155,rs960718,-0.031  
6,72.171,rs2396821,-0.028  
6,72.179,rs9395232,-0.028  
6,72.210,rs1630504,-0.026  
6,72.232,rs10484958,-0.022  
6,72.246,rs1884043,-0.020  
6,72.281,rs9369663,-0.014  
6,72.332,rs6919828,-0.012  
6,72.363,rs9473036,-0.010  
6,72.383,rs9473045,-0.008  
6,72.459,rs7744364,-0.004  
6,72.490,rs10456568,-0.009  
6,72.596,rs9473100,-0.013  
6,72.755,rs17289226,-0.024  
6,73.009,rs1360156,-0.036  
6,73.065,rs1329521,-0.039  
6,73.100,rs2039122,-0.035  
6,73.125,rs1325694,-0.036  
6,73.188,rs6458601,-0.039  
6,73.240,rs615396,-0.040  
6,73.263,rs325286,-0.041  
6,73.272,rs16877484,-0.040  
6,73.291,rs9463425,-0.038  
6,73.332,rs9473468,-0.035  
6,73.362,rs1938201,-0.037  
6,73.406,rs10484961,-0.042  
6,73.462,rs9381793,-0.052  
6,73.486,rs4711930,-0.058  
6,73.494,rs9463517,-0.060  
6,73.525,rs12624,-0.065  
6,73.550,rs699986,-0.073  
6,73.570,rs780444,-0.080  
6,73.601,rs2792833,-0.087  
6,73.616,rs9473701,-0.091  
6,73.618,rs1337823,-0.091  
6,73.654,rs7764185,-0.088  
6,73.728,rs9381861,-0.082  
6,73.739,rs1361504,-0.082  
6,73.752,rs9349534,-0.111  
6,73.794,rs7758661,-0.138



6,73.794,rs200257,-0.138  
6,73.921,rs2206272,-0.187  
6,73.942,rs2635727,-0.189  
6,74.020,rs283548,-0.189  
6,74.059,rs1886570,-0.196  
6,74.147,rs9473992,-0.201  
6,74.163,rs1536506,-0.202  
6,74.430,rs2439040,-0.238  
6,74.503,rs4715227,-0.244  
6,74.778,rs12206227,-0.272  
6,74.795,rs4715247,-0.271  
6,74.799,rs6935568,-0.266  
6,74.828,rs788510,-0.242  
6,74.835,rs788511,-0.240  
6,74.906,rs1321517,-0.220  
6,75.004,rs1266922,-0.191  
6,75.010,rs1266924,-0.190  
6,75.011,rs1321507,-0.190  
6,75.145,rs9370096,-0.184  
6,75.229,rs7768816,-0.172  
6,75.333,rs4715284,-0.137  
6,75.392,rs1999673,-0.118  
6,75.407,rs658262,-0.115  
6,75.422,rs9395771,-0.112  
6,75.473,rs2245502,-0.106  
6,75.568,rs11964472,-0.083  
6,75.590,rs1359227,-0.067  
6,75.595,rs567084,-0.064  
6,75.596,rs570854,-0.063  
6,75.601,rs8180555,-0.063  
6,75.758,rs614570,-0.062  
6,75.923,rs9382120,-0.062  
6,75.930,rs9474249,-0.061  
6,75.936,rs10484874,-0.060  
6,75.941,rs1883931,-0.059  
6,75.957,rs7746685,-0.069  
6,76.000,rs9474254,-0.063  
6,76.049,rs10948711,-0.056  
6,76.054,rs9296687,-0.052  
6,76.094,rs2670153,-0.058  
6,76.120,rs2180323,-0.063  
6,76.175,rs9296691,-0.065  
6,76.188,rs9474314,-0.085  
6,76.272,rs4715326,-0.074  
6,76.436,rs557135,-0.075  
6,76.504,rs4712026,-0.080  
6,76.522,rs521664,-0.067  
6,76.609,rs316144,-0.080  
6,76.758,rs10484407,-0.093  
6,76.858,rs9382181,-0.105  
6,77.009,rs2281274,-0.106  
6,77.097,rs209510,-0.115  
6,77.153,rs7776264,-0.118  
6,77.244,rs1377392,-0.130  
6,77.258,rs9395865,-0.131  
6,77.322,rs510420,-0.163  
6,77.332,rs6922238,-0.165  
6,77.364,rs574389,-0.168  
6,77.429,rs4712036,-0.177  
6,77.431,rs7738142,-0.180  
6,77.447,rs655630,-0.202

6,77.458,rs681635,-0.199  
6,77.496,rs9382219,-0.195  
6,77.500,rs497085,-0.194  
6,77.567,rs9370224,-0.165  
6,77.575,rs3823111,-0.163  
6,77.579,rs3799260,-0.162  
6,77.620,rs9370225,-0.133  
6,77.650,rs4715416,-0.111  
6,77.686,rs12201213,-0.101  
6,77.761,rs4715423,-0.095  
6,77.842,rs1409106,-0.129  
6,77.844,rs6930213,-0.150  
6,77.852,rs10484652,-0.132  
6,77.869,rs9474720,-0.101  
6,77.965,rs10484646,-0.083  
6,77.986,rs3798276,-0.082  
6,78.008,rs10948814,-0.085  
6,78.016,rs16885273,-0.085  
6,78.045,rs7757433,-0.084  
6,78.143,rs1039693,-0.084  
6,78.175,rs1546321,-0.085  
6,78.222,rs3125272,-0.080  
6,78.223,rs2047809,-0.080  
6,78.279,rs7775745,-0.083  
6,78.296,rs2134294,-0.075  
6,78.303,rs958626,-0.072  
6,78.304,rs3963,-0.070  
6,78.315,rs10498805,-0.061  
6,78.318,rs9464247,-0.059  
6,78.361,rs9464252,-0.060  
6,78.374,rs6917354,-0.059  
6,78.467,rs3925003,-0.047  
6,78.500,rs4236134,-0.041  
6,78.645,rs4267958,-0.028  
6,78.774,rs1154854,-0.018  
6,78.979,rs3734444,-0.017  
6,78.987,rs9367669,-0.017  
6,79.297,rs9475556,-0.013  
6,79.362,rs9464342,-0.012  
6,79.620,rs7771018,-0.010  
6,79.683,rs1925164,-0.003  
6,79.684,rs1925163,-0.003  
6,79.807,rs9464379,-0.001  
6,79.807,rs9370523,-0.001  
6,79.829,rs2397220,-0.001  
6,79.888,rs2143349,-0.000  
6,79.949,rs594008,0.000  
6,79.984,rs7750332,0.002  
6,80.095,rs9918490,0.001  
6,80.099,rs12204927,0.001  
6,80.107,rs1870639,0.001  
6,80.139,rs7747096,0.001  
6,80.141,rs1860652,-0.000  
6,80.154,rs9476005,-0.000  
6,80.256,rs3013143,-0.000  
6,80.541,rs1414803,-0.000  
6,80.560,rs11757669,-0.000  
6,80.672,rs9341378,-0.001  
6,80.776,rs9343253,-0.002  
6,81.035,rs10485358,-0.002  
6,81.089,rs2200105,-0.002

6,81.100,rs1482455,-0.002  
6,81.119,rs3003672,-0.003  
6,81.151,rs10944484,-0.004  
6,81.176,rs2050623,-0.004  
6,81.182,rs17403480,-0.004  
6,81.223,rs2184404,-0.004  
6,81.261,rs9452511,-0.003  
6,81.278,rs6934929,-0.003  
6,81.314,rs4710286,-0.003  
6,81.334,rs9453089,-0.004  
6,81.349,rs16895902,-0.003  
6,81.391,rs2144715,-0.002  
6,81.427,rs9345588,-0.001  
6,81.443,rs2350289,-0.001  
6,81.483,rs1041522,-0.002  
6,81.574,rs9354216,-0.002  
6,81.639,rs11968993,-0.004  
6,81.644,rs441770,-0.004  
6,81.650,rs1502991,-0.004  
6,81.732,rs9351511,-0.003  
6,81.837,rs9453400,-0.005  
6,81.861,rs12234120,-0.005  
6,81.871,rs2000382,-0.006  
6,81.872,rs9453448,-0.006  
6,81.878,rs2814107,-0.006  
6,81.916,rs851880,-0.008  
6,81.939,rs12192666,-0.008  
6,81.980,rs6900214,-0.008  
6,82.006,rs851854,-0.008  
6,82.115,rs6455106,-0.009  
6,82.347,rs2812143,-0.013  
6,82.478,rs10806542,-0.015  
6,82.552,rs183895,-0.017  
6,82.580,rs9453873,-0.016  
6,82.619,rs966984,-0.018  
6,82.663,rs13205957,-0.019  
6,82.687,rs6911607,-0.019  
6,82.780,rs10944945,-0.012  
6,82.880,rs9294750,-0.014  
6,83.087,rs9363809,-0.009  
6,83.089,rs12663045,-0.009  
6,83.203,rs7768996,-0.001  
6,83.229,rs897405,-0.000  
6,83.231,rs10945056,-0.000  
6,83.273,rs945823,-0.000  
6,83.281,rs777625,-0.001  
6,83.322,rs778010,-0.001  
6,83.359,rs1388052,-0.005  
6,83.372,rs1907146,-0.005  
6,83.401,rs2220589,-0.006  
6,83.405,rs9342706,-0.006  
6,83.421,rs17576708,-0.006  
6,83.445,rs7749220,-0.005  
6,83.451,rs4708157,-0.005  
6,83.459,rs352523,-0.009  
6,83.615,rs10484791,-0.016  
6,83.672,rs500125,-0.017  
6,83.701,rs2342761,-0.018  
6,83.763,rs3798999,-0.012  
6,83.808,rs3799039,-0.011  
6,83.821,rs779484,-0.011

6,83.839,rs13191298,-0.011  
6,83.860,rs7762967,-0.011  
6,83.867,rs2094596,-0.014  
6,83.876,rs9342757,-0.018  
6,83.897,rs7759294,-0.013  
6,83.900,rs6930785,-0.012  
6,83.921,rs1457498,-0.008  
6,83.921,rs2305840,-0.008  
6,83.925,rs13207318,-0.008  
6,83.932,rs951494,-0.009  
6,83.936,rs1934897,-0.009  
6,83.947,rs9454921,-0.010  
6,83.960,rs978291,-0.010  
6,83.962,rs1156404,-0.010  
6,83.962,rs3828767,-0.009  
6,83.966,rs3805994,-0.010  
6,84.019,rs495823,-0.005  
6,84.093,rs9294863,-0.001  
6,84.094,rs2242589,-0.000  
6,84.218,rs13216351,-0.010  
6,84.820,rs2691482,-0.005  
6,85.209,rs2273566,-0.000  
6,85.249,rs576516,-0.000  
6,85.271,rs9784769,-0.000  
6,85.272,rs639448,-0.000  
6,85.276,rs7750238,-0.000  
6,85.276,rs521116,-0.000  
6,85.278,rs2474918,-0.000  
6,85.310,rs6455394,-0.000  
6,85.333,rs2748324,-0.000  
6,85.338,rs16869719,-0.000  
6,85.361,rs718356,0.000  
6,85.475,rs12200732,0.001  
6,85.503,rs4707902,0.001  
6,85.547,rs6914937,0.002  
6,85.702,rs765466,0.002  
6,85.736,rs852937,0.002  
6,85.796,rs182106,0.003  
6,85.866,rs9358960,0.003  
6,86.050,rs829472,0.001  
6,86.065,rs1999083,0.001  
6,86.069,rs1932327,0.001  
6,86.226,rs4707954,0.006  
6,86.255,rs1192250,0.005  
6,86.262,rs9341356,0.004  
6,86.324,rs9350450,0.002  
6,86.386,rs519470,0.002  
6,86.427,rs6919752,0.001  
6,86.830,rs2815736,-0.000  
6,86.840,rs9442780,-0.000  
6,86.846,rs2492970,-0.000  
6,86.901,rs2781562,0.000  
6,87.062,rs1202109,-0.000  
6,87.066,rs1147572,-0.000  
6,87.078,rs12524568,0.000  
6,87.090,rs17692121,0.000  
6,87.118,rs7746067,0.001  
6,87.246,rs9293911,0.004  
6,87.301,rs16882900,0.005  
6,87.319,rs6928101,0.006  
6,87.321,rs1935515,0.006

6,87.365,rs9351948,0.007  
6,87.374,rs9446777,0.006  
6,87.421,rs10498886,0.006  
6,87.451,rs6916116,0.005  
6,87.453,rs1317537,0.006  
6,87.544,rs10943076,0.007  
6,87.621,rs12111515,0.008  
6,87.624,rs9343001,0.008  
6,87.631,rs6933440,0.008  
6,87.636,rs952880,0.008  
6,87.638,rs3778268,0.009  
6,87.641,rs9688792,0.009  
6,87.646,rs4708042,0.010  
6,87.654,rs526434,0.013  
6,87.675,rs583443,0.015  
6,87.680,rs687210,0.011  
6,87.684,rs2351127,0.009  
6,87.686,rs9442947,0.009  
6,87.689,rs9442951,0.009  
6,87.795,rs3012571,0.005  
6,88.048,rs9447104,0.004  
6,88.218,rs2951916,0.004  
6,88.260,rs9343298,0.004  
6,88.383,rs17792496,0.005  
6,88.384,rs3798461,0.005  
6,88.389,rs7766781,0.005  
6,88.445,rs3798451,0.003  
6,88.534,rs9343330,0.000  
6,88.567,rs12527817,-0.002  
6,88.599,rs4708205,-0.001  
6,88.647,rs1933479,-0.000  
6,88.686,rs2029151,-0.000  
6,88.749,rs6912202,-0.002  
6,88.801,rs12111160,-0.001  
6,88.967,rs4235898,-0.002  
6,88.980,rs9343467,-0.002  
6,89.027,rs2446094,-0.001  
6,89.047,rs7750507,-0.000  
6,89.050,rs1902852,-0.000  
6,89.055,rs1457963,-0.000  
6,89.062,rs6934358,-0.000  
6,89.113,rs1457946,-0.000  
6,89.142,rs13216684,-0.000  
6,89.153,rs323260,-0.000  
6,89.163,rs16888579,-0.000  
6,89.163,rs2206819,-0.000  
6,89.170,rs7747803,-0.000  
6,89.172,rs9343581,-0.000  
6,89.501,rs1777807,-0.004  
6,89.532,rs9359267,-0.004  
6,89.733,rs1824282,-0.008  
6,89.782,rs1902970,-0.009  
6,89.839,rs2504298,-0.011  
6,89.971,rs7761742,-0.018  
6,90.158,rs2174743,-0.024  
6,90.214,rs1415862,-0.026  
6,90.295,rs10484946,-0.029  
6,90.325,rs10943623,-0.037  
6,90.393,rs2184425,-0.028  
6,90.414,rs4055090,-0.027  
6,90.427,rs9294143,-0.025

6,90.440,rs3846739,-0.033  
6,90.452,rs2803191,-0.043  
6,90.537,rs2812683,-0.042  
6,90.582,rs6899814,-0.045  
6,90.603,rs2038293,-0.044  
6,90.606,rs12199053,-0.043  
6,90.622,rs10806179,-0.042  
6,90.624,rs1321847,-0.043  
6,90.630,rs2145572,-0.045  
6,90.635,rs9343946,-0.044  
6,90.651,rs2164166,-0.042  
6,90.676,rs10455125,-0.029  
6,90.678,rs9448870,-0.028  
6,90.679,rs17239632,-0.028  
6,90.720,rs7453746,-0.020  
6,90.798,rs806847,-0.022  
6,90.862,rs9449017,-0.022  
6,90.895,rs2444827,-0.023  
6,91.084,rs310405,-0.007  
6,91.194,rs1088022,-0.006  
6,91.205,rs9344186,-0.006  
6,91.232,rs16893209,-0.005  
6,91.334,rs2181364,-0.003  
6,91.423,rs9350935,-0.008  
6,91.431,rs1144175,-0.009  
6,91.440,rs6911841,-0.008  
6,91.471,rs194933,-0.008  
6,91.568,rs999567,-0.009  
6,91.596,rs12663436,-0.008  
6,91.611,rs1931646,-0.006  
6,91.619,rs7450340,-0.006  
6,91.703,rs6902034,-0.001  
6,91.737,rs9449392,0.000  
6,91.742,rs7454792,0.000  
6,91.749,rs2039669,0.000  
6,91.785,rs11752161,0.000  
6,91.870,rs521805,0.000  
6,91.884,rs6916677,0.000  
6,92.042,rs4351310,-0.000  
6,92.171,rs2253003,-0.001  
6,92.213,rs6931603,-0.001  
6,92.272,rs1040544,-0.001  
6,92.279,rs1076710,-0.001  
6,92.295,rs9294265,-0.001  
6,92.359,rs16879723,-0.003  
6,92.507,rs1180242,-0.014  
6,92.580,rs13205856,-0.007  
6,92.609,rs592188,-0.005  
6,92.621,rs13211072,-0.005  
6,92.702,rs215973,-0.008  
6,92.769,rs2274092,-0.002  
6,92.796,rs2324570,-0.001  
6,92.809,rs9350994,-0.001  
6,92.831,rs2023558,-0.000  
6,92.839,rs713170,-0.003  
6,92.842,rs9294298,-0.006  
6,92.852,rs9362054,-0.008  
6,92.866,rs9344403,-0.012  
6,92.913,rs9450002,-0.028  
6,92.919,rs2025866,-0.029  
6,93.131,rs7741631,-0.045

6,93.159,rs1884478,-0.047  
6,93.253,rs9362119,-0.047  
6,93.260,rs1325973,-0.044  
6,93.261,rs1409191,-0.044  
6,93.264,rs9450174,-0.041  
6,93.265,rs1321737,-0.039  
6,93.270,rs16875886,-0.034  
6,93.273,rs1037163,-0.033  
6,93.274,rs3903689,-0.029  
6,93.277,rs313178,-0.028  
6,93.278,rs4707190,-0.027  
6,93.280,rs6454463,-0.033  
6,93.284,rs9450273,-0.027  
6,93.285,rs881795,-0.028  
6,93.289,rs6900270,-0.030  
6,93.295,rs3900740,-0.028  
6,93.321,rs17443200,-0.019  
6,93.333,rs220428,-0.016  
6,93.336,rs6926588,-0.023  
6,93.339,rs9359692,-0.022  
6,93.340,rs3000069,-0.021  
6,93.341,rs6935746,-0.021  
6,93.346,rs13213204,-0.020  
6,93.358,rs1948991,-0.026  
6,93.370,rs1325183,-0.025  
6,93.380,rs7751208,-0.036  
6,93.387,rs10944288,-0.044  
6,93.393,rs11961178,-0.046  
6,93.411,rs6916994,-0.051  
6,93.412,rs10498960,-0.051  
6,93.434,rs13213285,-0.056  
6,93.444,rs6454648,-0.060  
6,93.445,rs7747510,-0.059  
6,93.445,rs9294390,-0.059  
6,93.446,rs722903,-0.059  
6,93.447,rs2787897,-0.059  
6,93.485,rs9362459,-0.043  
6,93.494,rs12528790,-0.049  
6,93.521,rs2509458,-0.063  
6,93.524,rs2282519,-0.065  
6,93.529,rs2509453,-0.039  
6,93.543,rs543049,-0.040  
6,93.576,rs366676,-0.050  
6,93.649,rs806454,-0.032  
6,93.686,rs806366,-0.044  
6,93.698,rs6928813,-0.045  
6,93.733,rs12213790,-0.045  
6,93.737,rs9450917,-0.044  
6,93.758,rs6927294,-0.040  
6,93.793,rs1408702,-0.034  
6,93.859,rs6938352,-0.024  
6,93.878,rs990060,-0.021  
6,93.887,rs9362494,-0.019  
6,93.888,rs723787,-0.018  
6,93.896,rs4707461,-0.014  
6,93.963,rs6454694,-0.008  
6,93.964,rs6931896,-0.008  
6,93.969,rs11756329,-0.007  
6,94.019,rs17492709,-0.002  
6,94.029,rs964888,-0.001  
6,94.033,rs2610763,-0.001

6,94.035,rs2279083,-0.001  
6,94.038,rs2875553,-0.001  
6,94.067,rs9294406,-0.000  
6,94.078,rs10085363,-0.000  
6,94.182,rs6901395,0.000  
6,94.404,rs2207553,0.002  
6,94.440,rs6903926,0.002  
6,94.738,rs7775554,0.000  
6,94.934,rs282136,0.000  
6,94.940,rs9444678,0.000  
6,94.959,rs282123,0.002  
6,95.046,rs3777522,0.001  
6,95.058,rs3798256,0.001  
6,95.118,rs6454752,0.003  
6,95.169,rs9344925,0.010  
6,95.211,rs7760851,0.011  
6,95.282,rs16881774,0.015  
6,95.534,rs854865,0.016  
6,95.877,rs9362662,0.018  
6,96.466,rs12212017,0.034  
6,96.610,rs369328,0.038  
6,96.722,rs292240,0.039  
6,96.766,rs9451295,0.038  
6,96.784,rs9351229,0.038  
6,96.844,rs3734662,0.048  
6,96.849,rs9362704,0.036  
6,96.908,rs16882302,0.037  
6,96.915,rs6454789,0.037  
6,96.931,rs11969265,0.049  
6,96.933,rs6910129,0.050  
6,96.972,rs7761142,0.029  
6,96.998,rs4707586,0.013  
6,97.083,rs6931936,0.018  
6,97.188,rs6932747,0.027  
6,97.269,rs990482,0.032  
6,97.522,rs2501720,0.054  
6,97.558,rs12209546,0.055  
6,97.633,rs206912,0.059  
6,97.850,rs12195431,0.064  
6,97.905,rs285630,0.069  
6,97.958,rs285616,0.075  
6,98.032,rs790595,0.073  
6,98.048,rs790584,0.063  
6,98.049,rs1868834,0.062  
6,98.131,rs9451413,0.087  
6,98.133,rs7745771,0.088  
6,98.365,rs284509,0.114  
6,98.392,rs157695,0.098  
6,98.395,rs205353,0.098  
6,98.540,rs10498970,0.093  
6,98.597,rs1884839,0.100  
6,98.617,rs9345044,0.099  
6,98.688,rs2141484,0.070  
6,98.717,rs9451486,0.066  
6,98.717,rs10485409,0.066  
6,98.719,rs16883560,0.066  
6,98.775,rs6913163,0.072  
6,98.813,rs1145778,0.058  
6,98.826,rs1145787,0.051  
6,98.857,rs1220445,0.043  
6,98.897,rs1144171,0.019



6,98.924,rs12211003,0.013  
6,98.996,rs9362825,0.003  
6,99.052,rs4707657,0.001  
6,99.089,rs4445032,0.000  
6,99.191,rs2748276,0.000  
6,99.216,rs2144363,0.000  
6,99.297,rs2748285,0.002  
6,99.463,rs4112305,0.006  
6,99.511,rs16884625,0.008  
6,99.689,rs4318847,0.011  
6,99.710,rs1498260,0.010  
6,99.781,rs11756114,0.007  
6,99.782,rs2249818,0.007  
6,99.787,rs9362948,0.008  
6,99.788,rs4502906,0.009  
6,99.792,rs9362961,0.008  
6,99.793,rs13204161,0.008  
6,99.823,rs878519,0.011  
6,99.834,rs7740559,0.013  
6,99.847,rs6935299,0.007  
6,99.953,rs6918777,0.004  
6,99.976,rs17654546,0.003  
6,100.004,rs6908465,0.001  
6,100.141,rs1338263,0.000  
6,100.146,rs6923057,0.000  
6,100.173,rs655096,0.000  
6,100.193,rs652520,0.000  
6,100.207,rs1590392,0.003  
6,100.229,rs576798,0.005  
6,100.285,rs2147222,0.017  
6,100.294,rs9445080,0.016  
6,100.310,rs4288174,0.015  
6,100.338,rs631175,0.009  
6,100.353,rs1572102,0.007  
6,100.413,rs164301,0.001  
6,100.421,rs16871170,0.001  
6,100.468,rs564158,0.001  
6,100.477,rs2278107,0.001  
6,100.500,rs682230,0.001  
6,100.507,rs1906969,0.001  
6,100.543,rs7757023,0.000  
6,100.593,rs9363108,0.000  
6,100.644,rs1937359,0.000  
6,100.676,rs2029322,0.000  
6,100.679,rs1352380,0.002  
6,100.725,rs525413,0.003  
6,100.760,rs12216311,0.004  
6,100.784,rs2021314,0.004  
6,100.831,rs7763538,0.003  
6,100.845,rs386272,0.003  
6,100.855,rs385368,0.002  
6,100.894,rs390661,0.001  
6,100.909,rs1033581,0.000  
6,100.930,rs9294602,0.000  
6,101.022,rs4299796,0.000  
6,101.092,rs9452884,0.000  
6,101.104,rs2502037,0.001  
6,101.454,rs9360079,0.001  
6,101.498,rs12663902,0.002  
6,101.561,rs7749777,0.005  
6,101.594,rs4839952,0.009

6,101.609,rs4839992,0.008  
6,101.626,rs6899560,0.010  
6,101.628,rs6570428,0.011  
6,101.630,rs10499006,0.011  
6,101.643,rs17055669,0.014  
6,101.644,rs12190516,0.014  
6,101.648,rs526939,0.015  
6,101.649,rs489849,0.015  
6,101.660,rs17055848,0.016  
6,101.661,rs612612,0.016  
6,101.669,rs9322615,0.020  
6,101.685,rs7768089,0.039  
6,101.699,rs12661236,0.041  
6,101.760,rs6934392,0.052  
6,101.880,rs927271,0.052  
6,101.897,rs7761211,0.034  
6,101.898,rs1334328,0.033  
6,101.933,rs13218880,0.015  
6,101.937,rs933042,0.014  
6,101.939,rs7746875,0.008  
6,102.007,rs2206573,0.005  
6,102.034,rs9487151,0.004  
6,102.113,rs12528971,0.000  
6,102.127,rs6568649,0.000  
6,102.154,rs4839882,0.000  
6,102.170,rs1359931,0.000  
6,102.198,rs7762923,0.000  
6,102.324,rs1997933,0.000  
6,102.328,rs1206131,0.000  
6,102.351,rs1206147,0.002  
6,102.428,rs1474620,0.006  
6,102.732,rs7775139,-0.000  
6,102.824,rs7765980,-0.000  
6,102.880,rs7757567,-0.000  
6,102.881,rs9320672,-0.000  
6,102.902,rs12527293,-0.002  
6,102.907,rs600613,-0.002  
6,102.989,rs6922758,-0.000  
6,103.034,rs6940021,-0.001  
6,103.314,rs6940828,-0.004  
6,103.365,rs7767825,-0.005  
6,103.408,rs9321063,-0.009  
6,103.414,rs9388482,-0.008  
6,103.447,rs158777,-0.004  
6,103.458,rs11961327,-0.005  
6,103.596,rs4406241,-0.013  
6,103.603,rs7762570,-0.013  
6,103.617,rs9402154,-0.006  
6,103.740,rs2747734,-0.007  
6,103.781,rs9493282,-0.007  
6,103.793,rs9375894,-0.006  
6,103.825,rs12111251,-0.005  
6,103.848,rs12206927,-0.004  
6,103.878,rs17059246,-0.001  
6,103.880,rs4458696,-0.001  
6,103.884,rs2132683,-0.000  
6,103.889,rs9402564,-0.000  
6,103.919,rs6933093,0.001  
6,103.950,rs17059400,0.001  
6,103.951,rs4144165,0.001  
6,104.025,rs543967,0.004

6,104.107,rs6908196,0.005  
6,104.118,rs10485227,0.005  
6,104.129,rs9376435,0.005  
6,104.137,rs7763983,0.005  
6,104.186,rs9403208,0.004  
6,104.250,rs3890820,0.003  
6,104.258,rs6903499,0.002  
6,104.271,rs6910833,0.001  
6,104.275,rs17060130,0.001  
6,104.307,rs6916538,0.001  
6,104.311,rs761711,0.003  
6,104.373,rs9399482,0.002  
6,104.447,rs1506084,0.003  
6,104.462,rs453530,0.003  
6,104.875,rs7740783,0.004  
6,105.038,rs17061291,0.001  
6,105.136,rs1338162,0.000  
6,105.147,rs1890276,0.000  
6,105.151,rs1465169,0.000  
6,105.241,rs3808,0.000  
6,105.302,rs2023169,0.000  
6,105.408,rs611348,-0.001  
6,105.428,rs512051,-0.001  
6,105.591,rs9485530,0.000  
6,105.846,rs9498687,-0.000  
6,106.028,rs1417182,-0.000  
6,106.035,rs9485557,-0.000  
6,106.085,rs988376,-0.000  
6,106.104,rs2852605,0.000  
6,106.149,rs9498821,0.000  
6,106.231,rs13190906,0.001  
6,106.259,rs3849205,0.001  
6,106.280,rs9498961,0.001  
6,106.283,rs7750307,0.001  
6,106.284,rs6909610,0.001  
6,106.292,rs11156175,0.001  
6,106.379,rs7752919,0.009  
6,106.393,rs9322668,0.009  
6,106.457,rs1431218,0.006  
6,106.505,rs763231,0.004  
6,106.620,rs4945830,0.000  
6,106.659,rs9377478,0.000  
6,106.702,rs9391023,0.000  
6,106.713,rs2506721,-0.000  
6,106.782,rs9399841,-0.002  
6,106.813,rs9386386,-0.001  
6,106.854,rs9373729,-0.003  
6,106.859,rs4610597,-0.003  
6,106.888,rs9485899,-0.003  
6,106.900,rs4639362,-0.003  
6,106.910,rs7774633,-0.008  
6,106.925,rs4489183,-0.009  
6,106.943,rs9377585,-0.010  
6,106.963,rs4357170,-0.009  
6,107.005,rs6906370,-0.005  
6,107.013,rs12110847,-0.005  
6,107.014,rs9386402,-0.006  
6,107.024,rs9322793,-0.003  
6,107.110,rs2744183,-0.006  
6,107.166,rs156149,-0.005  
6,107.265,rs94802,-0.002

6,107.536,rs4079063,-0.006  
6,107.645,rs12194974,-0.001  
6,107.677,rs369065,-0.001  
6,107.713,rs7750532,-0.001  
6,107.757,rs1890227,-0.000  
6,107.779,rs17524448,-0.000  
6,107.789,rs9404605,-0.000  
6,107.839,rs1765924,0.000  
6,107.866,rs947213,0.000  
6,107.883,rs1189924,0.000  
6,107.928,rs1149319,0.000  
6,107.996,rs6910880,0.001  
6,108.031,rs9486097,0.000  
6,108.036,rs7765899,0.000  
6,108.045,rs12196063,0.000  
6,108.080,rs1269287,-0.000  
6,108.103,rs4946669,-0.001  
6,108.109,rs9373790,-0.001  
6,108.125,rs6925857,-0.003  
6,108.146,rs7752220,-0.004  
6,108.147,rs9386458,-0.004  
6,108.164,rs2859307,-0.014  
6,108.166,rs1041914,-0.021  
6,108.210,rs6568387,-0.016  
6,108.361,rs1948999,-0.031  
6,108.447,rs1876560,-0.044  
6,108.479,rs7738222,-0.047  
6,108.482,rs1007664,-0.047  
6,108.547,rs6917664,-0.038  
6,108.560,rs11966261,-0.049  
6,108.589,rs9372110,-0.029  
6,108.594,rs9486210,-0.024  
6,108.652,rs4946705,-0.000  
6,108.674,rs4945734,0.001  
6,108.694,rs6933284,0.001  
6,108.753,rs6926851,0.002  
6,108.771,rs9373821,0.002  
6,108.813,rs4945738,0.002  
6,108.983,rs4555967,0.002  
6,109.100,rs693612,0.007  
6,109.142,rs6901662,0.009  
6,109.190,rs4946730,0.007  
6,109.255,rs710090,0.006  
6,109.436,rs633724,0.003  
6,109.616,rs710092,0.001  
6,109.618,rs3851212,0.001  
6,109.652,rs2353594,0.001  
6,109.697,rs11152984,0.001  
6,109.711,rs1340611,0.001  
6,109.751,rs879826,0.001  
6,109.759,rs6908605,0.002  
6,109.801,rs6905896,0.004  
6,109.833,rs744899,0.007  
6,109.865,rs9480678,0.012  
6,109.889,rs1417356,0.018  
6,109.938,rs6929649,0.017  
6,109.941,rs1462147,0.017  
6,110.178,rs12333016,0.024  
6,110.186,rs6910496,0.017  
6,110.252,rs9386579,0.018  
6,110.260,rs3104037,0.018

6,110.305,rs2748289,0.017  
6,110.370,rs9480705,0.020  
6,110.383,rs3117389,0.020  
6,110.435,rs6920626,0.032  
6,110.457,rs7775079,0.042  
6,110.480,rs3127646,0.038  
6,110.518,rs4946795,0.028  
6,110.606,rs12197404,0.023  
6,110.614,rs1900601,0.023  
6,110.729,rs9400081,0.020  
6,110.742,rs1762703,0.018  
6,110.830,rs4946810,0.023  
6,110.890,rs9400094,0.027  
6,110.954,rs11759792,0.025  
6,111.509,rs319107,0.025  
6,111.657,rs6936145,0.026  
6,111.730,rs9373951,0.027  
6,111.733,rs3924727,0.027  
6,111.737,rs2914,0.026  
6,111.738,rs699696,0.036  
6,111.804,rs1401171,0.032  
6,111.977,rs2244924,0.057  
6,112.001,rs12204951,0.061  
6,112.013,rs9384666,0.073  
6,112.025,rs9372175,0.086  
6,112.047,rs11153096,0.093  
6,112.095,rs17069204,0.081  
6,112.154,rs7769514,0.071  
6,112.183,rs12180499,0.059  
6,112.225,rs218291,0.030  
6,112.229,rs12173906,0.030  
6,112.270,rs217528,0.025  
6,112.369,rs635051,0.021  
6,112.764,rs9480861,0.014  
6,112.766,rs9374035,0.014  
6,112.788,rs9372187,0.014  
6,112.990,rs517924,0.011  
6,113.003,rs6913023,0.012  
6,113.005,rs9486931,0.019  
6,113.035,rs520324,0.022  
6,113.064,rs1146229,0.014  
6,113.114,rs9486961,0.013  
6,113.148,rs1268055,0.013  
6,113.187,rs2806371,0.011  
6,113.243,rs2806358,0.008  
6,113.329,rs2883970,0.003  
6,113.385,rs10046283,0.001  
6,113.493,rs191611,-0.000  
6,113.565,rs13210693,-0.001  
6,113.741,rs4946977,-0.008  
6,113.810,rs1321207,-0.011  
6,114.073,rs10499054,-0.018  
6,114.104,rs4546525,-0.023  
6,114.189,rs6903208,-0.046  
6,114.198,rs4557564,-0.050  
6,114.212,rs4947035,-0.061  
6,114.230,rs9487258,-0.074  
6,114.268,rs4354185,-0.058  
6,114.453,rs12191724,-0.040  
6,114.621,rs761586,-0.026  
6,114.626,rs976471,-0.029

6,114.632,rs11963809,-0.028  
6,114.657,rs9374165,-0.027  
6,114.699,rs9487396,-0.023  
6,114.700,rs9384741,-0.023  
6,114.717,rs17578180,-0.029  
6,114.718,rs9481067,-0.029  
6,114.759,rs2428190,-0.024  
6,114.813,rs1989634,-0.016  
6,114.819,rs2817782,-0.015  
6,114.878,rs13197089,-0.018  
6,115.103,rs3749866,-0.009  
6,115.228,rs781499,-0.006  
6,115.342,rs3851222,-0.001  
6,115.362,rs9386996,-0.000  
6,115.827,rs11755082,0.000  
6,115.907,rs2235175,-0.000  
6,116.009,rs6919400,0.000  
6,116.064,rs706895,0.002  
6,116.118,rs2213842,0.002  
6,116.165,rs2072026,0.003  
6,116.195,rs971402,0.008  
6,116.334,rs9487875,0.009  
6,116.352,rs12195540,0.009  
6,116.429,rs6933749,0.009  
6,116.436,rs9400534,0.007  
6,116.462,rs4947185,0.007  
6,116.604,rs1276628,0.011  
6,116.737,rs6926282,0.008  
6,116.826,rs12526710,0.007  
6,116.887,rs9374352,0.006  
6,116.890,rs9384838,0.006  
6,117.051,rs4947202,0.006  
6,117.096,rs9384847,0.006  
6,117.148,rs1542581,0.007  
6,117.268,rs1774053,0.003  
6,117.386,rs7773871,0.000  
6,117.445,rs774410,0.001  
6,117.458,rs9488123,0.001  
6,117.511,rs2637534,0.001  
6,117.530,rs9320443,-0.000  
6,117.535,rs509687,-0.000  
6,117.579,rs2049923,0.000  
6,117.580,rs7751070,0.000  
6,117.596,rs4945955,0.002  
6,117.617,rs6939843,0.001  
6,117.668,rs2030926,-0.000  
6,117.679,rs6907551,-0.001  
6,117.688,rs2615519,-0.001  
6,117.731,rs352074,0.000  
6,117.735,rs352098,0.000  
6,117.750,rs9481408,0.004  
6,117.751,rs9320485,0.004  
6,117.754,rs1323056,0.002  
6,117.757,rs6568842,0.004  
6,117.760,rs3003879,0.006  
6,117.761,rs7752198,0.002  
6,117.765,rs9372417,0.002  
6,118.037,rs1997858,0.001  
6,118.073,rs1556614,0.001  
6,118.098,rs6916017,0.001  
6,118.116,rs515413,0.002

6,118.246,rs958738,0.000  
6,118.334,rs17077867,0.001  
6,118.341,rs9488914,0.001  
6,118.347,rs3778002,0.001  
6,118.366,rs508521,0.001  
6,118.383,rs2637679,0.001  
6,118.544,rs636252,0.003  
6,118.589,rs9320588,0.003  
6,118.643,rs1577244,0.003  
6,118.667,rs783373,0.003  
6,118.720,rs620590,0.007  
6,118.736,rs441184,0.013  
6,118.741,rs2778,0.016  
6,118.745,rs485768,0.018  
6,118.751,rs3777958,0.021  
6,118.757,rs508278,0.022  
6,118.767,rs2157535,0.022  
6,118.792,rs765516,0.023  
6,118.829,rs1321811,0.033  
6,118.848,rs4946263,0.024  
6,118.891,rs4946273,0.032  
6,118.910,rs12530278,0.036  
6,118.911,rs9767278,0.037  
6,118.913,rs11751090,0.037  
6,118.921,rs1541317,0.039  
6,118.932,rs11755703,0.035  
6,118.957,rs667994,0.033  
6,118.960,rs7754471,0.032  
6,118.970,rs9481736,0.032  
6,119.042,rs9320622,0.026  
6,119.100,rs2105019,0.018  
6,119.111,rs2152076,0.017  
6,119.309,rs13220480,0.004  
6,119.363,rs9481852,0.003  
6,119.385,rs9489522,0.003  
6,119.491,rs1889561,0.002  
6,119.523,rs7749394,0.002  
6,119.538,rs676491,0.004  
6,119.541,rs9320680,0.004  
6,119.550,rs4140634,0.004  
6,119.651,rs9320690,0.006  
6,119.701,rs4551205,0.006  
6,119.751,rs12212125,0.007  
6,119.819,rs7776137,0.010  
6,119.838,rs1933873,0.012  
6,119.840,rs2358048,0.012  
6,119.872,rs9490054,0.015  
6,120.041,rs7745023,0.036  
6,120.124,rs17083553,0.051  
6,120.131,rs17083598,0.056  
6,120.155,rs6932373,0.076  
6,120.210,rs4946578,0.073  
6,120.226,rs4523118,0.075  
6,120.656,rs13210237,0.092  
6,120.669,rs10499116,0.093  
6,120.705,rs2684257,0.092  
6,121.204,rs7751410,0.074  
6,121.309,rs1741820,0.075  
6,121.667,rs13191198,0.085  
6,121.833,rs4382328,0.120  
6,121.881,rs17084798,0.135

6,121.895,rs12204690,0.139  
6,121.926,rs9388133,0.129  
6,121.946,rs936806,0.120  
6,121.949,rs1485649,0.120  
6,122.000,rs9375185,0.127  
6,122.010,rs2046446,0.129  
6,122.023,rs9375186,0.132  
6,122.094,rs4962262,0.135  
6,122.135,rs9401605,0.125  
6,122.181,rs9490584,0.107  
6,122.222,rs7453004,0.126  
6,122.428,rs7774522,0.111  
6,122.588,rs9490673,0.116  
6,122.833,rs12206156,0.130  
6,123.214,rs4897255,0.087  
6,123.306,rs6905496,0.082  
6,123.340,rs1998262,0.054  
6,123.347,rs1407220,0.063  
6,123.365,rs1321084,0.057  
6,123.391,rs1590246,0.055  
6,123.404,rs7760343,0.042  
6,123.516,rs9482421,0.029  
6,123.701,rs3861460,0.035  
6,123.786,rs9490950,0.039  
6,123.802,rs9490959,0.038  
6,123.807,rs9375285,0.038  
6,123.884,rs9388287,0.042  
6,123.886,rs7764708,0.042  
6,124.033,rs1267992,0.054  
6,124.084,rs7742884,0.051  
6,124.114,rs9320971,0.075  
6,124.130,rs6935830,0.092  
6,124.153,rs234481,0.088  
6,124.163,rs234478,0.089  
6,124.217,rs1858234,0.101  
6,124.225,rs9320975,0.102  
6,124.227,rs17086577,0.102  
6,124.338,rs163286,0.102  
6,124.529,rs2689887,0.077  
6,124.594,rs2753147,0.039  
6,124.597,rs802500,0.027  
6,124.636,rs802504,0.026  
6,124.643,rs12214721,0.026  
6,124.745,rs4510696,0.017  
6,124.756,rs7751845,0.016  
6,124.822,rs523240,0.018  
6,124.993,rs1842129,0.016  
6,125.020,rs7773205,0.027  
6,125.070,rs527307,0.035  
6,125.142,rs1382647,0.027  
6,125.161,rs10499129,0.025  
6,125.190,rs504008,0.023  
6,125.242,rs1677933,0.021  
6,125.340,rs17767102,0.021  
6,125.424,rs7754584,0.027  
6,125.469,rs9401773,0.030  
6,125.520,rs6569399,0.037  
6,125.524,rs579493,0.051  
6,125.577,rs476436,0.052  
6,125.793,rs9491388,0.049  
6,125.795,rs17053052,0.049



6,125.842,rs9482645,0.048  
6,125.856,rs7756600,0.048  
6,126.012,rs4895745,0.068  
6,126.038,rs6923813,0.070  
6,126.170,rs11964411,0.079  
6,126.570,rs6919947,0.109  
6,126.652,rs9398792,0.113  
6,127.124,rs1378579,0.182  
6,127.332,rs1034207,0.174  
6,127.376,rs4644087,0.172  
6,127.377,rs13202608,0.172  
6,127.449,rs9401955,0.159  
6,127.480,rs7776028,0.159  
6,127.507,rs2121881,0.159  
6,127.541,rs17299841,0.153  
6,127.542,rs498692,0.153  
6,127.561,rs12661098,0.155  
6,127.574,rs920992,0.155  
6,127.621,rs802726,0.161  
6,127.630,rs9375543,0.136  
6,127.640,rs7776358,0.114  
6,127.658,rs17828130,0.111  
6,127.672,rs4498385,0.112  
6,127.716,rs6923988,0.115  
6,127.722,rs17352289,0.115  
6,127.788,rs1891150,0.108  
6,127.818,rs9491960,0.105  
6,127.859,rs1016015,0.108  
6,127.979,rs9402050,0.121  
6,128.139,rs12208509,0.140  
6,128.173,rs471145,0.144  
6,128.322,rs4487603,0.148  
6,128.462,rs9375609,0.151  
6,128.479,rs11154461,0.155  
6,128.560,rs12664291,0.152  
6,128.627,rs10447440,0.148  
6,128.628,rs265365,0.149  
6,128.656,rs2448011,0.160  
6,128.663,rs265371,0.162  
6,128.679,rs12208401,0.167  
6,128.691,rs2306942,0.166  
6,128.764,rs2437090,0.159  
6,128.786,rs4143750,0.161  
6,128.942,rs9375634,0.153  
6,128.958,rs2571588,0.147  
6,129.023,rs9321174,0.125  
6,129.076,rs10499163,0.114  
6,129.153,rs2051632,0.089  
6,129.186,rs1023480,0.072  
6,129.216,rs7768656,0.065  
6,129.244,rs7753327,0.060  
6,129.262,rs376632,0.048  
6,129.270,rs208869,0.044  
6,129.322,rs17057836,0.027  
6,129.326,rs6905254,0.026  
6,129.349,rs6931600,0.025  
6,129.428,rs1480521,0.021  
6,129.544,rs9492408,0.015  
6,129.652,rs7759830,0.011  
6,129.657,rs9398929,0.011  
6,129.737,rs11757973,0.005

6,129.814,rs4897358,0.002  
6,129.871,rs6569647,0.002  
6,129.926,rs6928313,0.006  
6,129.950,rs4327721,0.006  
6,129.987,rs3777428,0.006  
6,130.022,rs9402219,0.006  
6,130.024,rs7749850,0.003  
6,130.044,rs4897377,0.001  
6,130.074,rs962011,-0.001  
6,130.219,rs17059090,0.001  
6,130.224,rs9492602,0.001  
6,130.244,rs2876086,0.001  
6,130.254,rs17059166,0.001  
6,130.282,rs9398947,0.004  
6,130.285,rs6914156,0.004  
6,130.298,rs1316537,0.005  
6,130.317,rs4144213,0.006  
6,130.318,rs9388813,0.006  
6,130.349,rs9492683,0.008  
6,130.405,rs4897451,0.006  
6,130.443,rs2326985,0.008  
6,130.492,rs9402292,0.009  
6,130.587,rs9321265,0.013  
6,130.655,rs516473,0.020  
6,130.656,rs1746477,0.020  
6,130.661,rs497082,0.017  
6,130.665,rs1886073,0.022  
6,130.691,rs10484765,0.031  
6,130.707,rs4897509,0.045  
6,130.716,rs2031205,0.044  
6,130.869,rs2749928,0.025  
6,130.936,rs365475,0.007  
6,130.938,rs9493099,0.008  
6,130.939,rs2021966,0.008  
6,130.994,rs1029122,0.012  
6,131.160,rs1321267,0.001  
6,131.172,rs728371,0.001  
6,131.216,rs17061077,0.002  
6,131.244,rs1406937,0.002  
6,131.280,rs4897574,0.004  
6,131.305,rs6909136,0.004  
6,131.371,rs7745230,0.009  
6,131.431,rs9385608,0.006  
6,131.437,rs10499186,0.006  
6,131.482,rs13205427,0.005  
6,131.507,rs2842889,0.004  
6,131.517,rs7758170,0.003  
6,131.566,rs2153174,0.000  
6,131.596,rs1361281,0.000  
6,131.607,rs8192624,0.000  
6,131.641,rs4305747,-0.000  
6,131.656,rs12200377,-0.000  
6,131.660,rs1081076,-0.000  
6,131.720,rs1569651,-0.000  
6,131.800,rs2294757,0.000  
6,131.802,rs3756975,-0.000  
6,132.008,rs1408064,0.002  
6,132.076,rs17062051,0.010  
6,132.090,rs4571580,0.011  
6,132.130,rs1338012,0.014  
6,132.151,rs12524250,0.013

6,132.154,rs745091,0.014  
6,132.160,rs7766140,0.016  
6,132.164,rs159407,0.016  
6,132.174,rs9385647,0.016  
6,132.190,rs3777878,0.018  
6,132.196,rs3734279,0.020  
6,132.199,rs9493636,0.021  
6,132.228,rs9375980,0.019  
6,132.237,rs10457611,0.020  
6,132.697,rs2209044,0.015  
6,132.901,rs969282,0.007  
6,132.915,rs2327430,0.009  
6,133.132,rs9373073,0.009  
6,133.340,rs2811679,0.021  
6,133.358,rs965652,0.023  
6,133.403,rs2627229,0.044  
6,133.493,rs6908581,0.052  
6,133.572,rs4243446,0.056  
6,133.700,rs2811690,0.053  
6,133.874,rs1763527,0.038  
6,134.191,rs1763510,0.039  
6,134.560,rs9493891,0.062  
6,134.770,rs379977,0.076  
6,134.901,rs9493917,0.061  
6,134.940,rs9402592,0.058  
6,134.947,rs736476,0.056  
6,134.949,rs6569943,0.056  
6,134.958,rs9373094,0.057  
6,134.988,rs2295199,0.047  
6,135.023,rs2144219,0.044  
6,135.072,rs13199020,0.041  
6,135.075,rs7739403,0.041  
6,135.178,rs7747509,0.066  
6,135.205,rs7757871,0.068  
6,135.228,rs1407107,0.067  
6,135.289,rs9483751,0.062  
6,135.297,rs9402653,0.063  
6,135.465,rs1014021,0.058  
6,135.628,rs3819409,0.071  
6,135.663,rs4896134,0.096  
6,135.805,rs17778438,0.129  
6,135.923,rs9402717,0.146  
6,136.203,rs6570048,0.194  
6,136.212,rs7767574,0.196  
6,136.223,rs9494412,0.194  
6,136.259,rs2876317,0.152  
6,136.412,rs13212385,0.201  
6,136.418,rs7747433,0.194  
6,136.422,rs6921041,0.190  
6,136.518,rs7770239,0.178  
6,136.824,rs9494473,0.142  
6,136.877,rs9494492,0.136  
6,137.026,rs7746031,0.129  
6,137.090,rs6931974,0.127  
6,137.483,rs2181096,0.084  
6,137.600,rs13191834,0.075  
6,137.777,rs9389413,0.073  
6,137.839,rs6917580,0.073  
6,137.870,rs9402838,0.080  
6,137.888,rs6914406,0.077  
6,137.911,rs3765259,0.073

6,137.923,rs9402839,0.072  
6,138.017,rs9111182,0.067  
6,138.450,rs17065704,0.049  
6,138.578,rs7743308,0.048  
6,138.587,rs6928748,0.049  
6,138.642,rs10872465,0.048  
6,138.714,rs1744061,0.048  
6,138.884,rs276550,0.030  
6,138.957,rs10484796,0.038  
6,139.032,rs10484798,0.047  
6,139.049,rs9494674,0.045  
6,139.127,rs4896243,0.044  
6,139.165,rs9376268,0.049  
6,139.168,rs12204754,0.051  
6,139.194,rs12529779,0.068  
6,139.196,rs608914,0.064  
6,139.224,rs673156,0.073  
6,139.271,rs2807897,0.072  
6,139.321,rs9321590,0.072  
6,139.325,rs7769903,0.087  
6,139.331,rs9321591,0.087  
6,139.376,rs7747814,0.088  
6,139.447,rs3914898,0.091  
6,139.600,rs737467,0.090  
6,139.670,rs7773301,0.099  
6,139.752,rs1000041,0.102  
6,139.799,rs1000738,0.102  
6,139.871,rs203698,0.100  
6,139.931,rs662100,0.094  
6,140.010,rs9494831,0.090  
6,140.017,rs6917072,0.090  
6,140.062,rs473892,0.089  
6,140.207,rs10499195,0.092  
6,140.320,rs999638,0.096  
6,140.476,rs6923167,0.106  
6,140.644,rs9321634,0.113  
6,140.736,rs6941603,0.129  
6,140.772,rs4388301,0.127  
6,140.819,rs7768419,0.117  
6,140.820,rs11154954,0.118  
6,140.885,rs9376314,0.114  
6,140.892,rs6570205,0.114  
6,141.006,rs9321647,0.115  
6,141.187,rs7774240,0.110  
6,141.194,rs1883468,0.109  
6,141.199,rs9385824,0.128  
6,141.205,rs1474664,0.130  
6,141.298,rs1509683,0.141  
6,141.521,rs9376339,0.162  
6,141.729,rs203139,0.161  
6,141.913,rs10499200,0.155  
6,142.000,rs6937832,0.136  
6,142.012,rs7741143,0.134  
6,142.034,rs12527125,0.153  
6,142.036,rs9389585,0.155  
6,142.121,rs3923724,0.200  
6,142.333,rs6928475,0.192  
6,142.359,rs6940013,0.191  
6,142.485,rs9376361,0.187  
6,142.526,rs4598095,0.184  
6,142.719,rs6927344,0.136

6,142.774,rs722653,0.119  
6,142.841,rs9403008,0.119  
6,142.878,rs9399258,0.123  
6,142.948,rs1188854,0.133  
6,142.949,rs6937315,0.133  
6,142.969,rs17067985,0.136  
6,143.297,rs9399268,0.181  
6,143.352,rs2504377,0.192  
6,143.488,rs9403037,0.203  
6,143.590,rs3777677,0.276  
6,143.595,rs6927712,0.291  
6,143.628,rs11155065,0.366  
6,143.670,rs10085329,0.364  
6,143.679,rs3010311,0.367  
6,143.862,rs9495497,0.370  
6,143.881,rs9376422,0.370  
6,144.062,rs9389694,0.334  
6,144.148,rs7750201,0.365  
6,144.247,rs9495538,0.368  
6,144.526,rs6904272,0.352  
6,144.728,rs1408295,0.339  
6,144.779,rs9376523,0.335  
6,144.810,rs582203,0.336  
6,144.815,rs672033,0.337  
6,144.822,rs9389870,0.339  
6,144.972,rs11962370,0.369  
6,144.998,rs9376624,0.364  
6,145.069,rs1415909,0.332  
6,145.095,rs9321832,0.320  
6,145.096,rs9496126,0.323  
6,145.107,rs6913823,0.359  
6,145.165,rs7753254,0.389  
6,145.195,rs7758295,0.370  
6,145.259,rs17054023,0.328  
6,145.276,rs4596499,0.318  
6,145.321,rs9376669,0.294  
6,145.447,rs7765914,0.276  
6,145.464,rs1953319,0.276  
6,145.501,rs9389983,0.286  
6,145.702,rs263156,0.215  
6,145.724,rs17071903,0.211  
6,145.731,rs12191946,0.209  
6,145.750,rs9403404,0.203  
6,145.932,rs12525269,0.150  
6,146.001,rs765875,0.132  
6,146.010,rs198683,0.130  
6,146.023,rs9496475,0.132  
6,146.029,rs9403421,0.135  
6,146.059,rs13203900,0.149  
6,146.089,rs9496500,0.103  
6,146.092,rs9496502,0.087  
6,146.094,rs199248,0.080  
6,146.097,rs9321886,0.079  
6,146.158,rs7738387,0.069  
6,146.185,rs6908441,0.066  
6,146.204,rs9403460,0.067  
6,146.208,rs7772833,0.067  
6,146.269,rs9496563,0.071  
6,146.325,rs223607,0.075  
6,146.334,rs7757142,0.094  
6,146.335,rs223588,0.097

6,146.339,rs909842,0.097  
6,146.362,rs6929191,0.080  
6,146.381,rs161064,0.080  
6,146.458,rs9496698,0.081  
6,146.465,rs9496703,0.080  
6,146.475,rs10484805,0.079  
6,146.515,rs9496751,0.077  
6,146.516,rs1015341,0.077  
6,146.524,rs9386046,0.071  
6,146.532,rs11962678,0.074  
6,146.537,rs6931825,0.075  
6,146.545,rs2295202,0.074  
6,146.567,rs9390143,0.086  
6,146.591,rs11155329,0.110  
6,146.600,rs4896684,0.118  
6,146.609,rs9496805,0.115  
6,146.631,rs6930726,0.110  
6,146.642,rs2273323,0.106  
6,146.688,rs2328542,0.089  
6,146.720,rs7760281,0.092  
6,146.724,rs6570608,0.077  
6,146.745,rs4896703,0.083  
6,146.774,rs7767952,0.107  
6,146.865,rs9321974,0.101  
6,146.881,rs4895643,0.109  
6,146.885,rs4473877,0.109  
6,146.985,rs4896735,0.110  
6,147.076,rs10499238,0.122  
6,147.079,rs9376865,0.122  
6,147.093,rs6931349,0.101  
6,147.114,rs7769065,0.098  
6,147.135,rs17819123,0.094  
6,147.137,rs1953793,0.094  
6,147.182,rs13199258,0.087  
6,147.209,rs649933,0.082  
6,147.237,rs7757238,0.063  
6,147.256,rs10484702,0.051  
6,147.285,rs566661,0.047  
6,147.300,rs13191080,0.047  
6,147.379,rs12524615,0.054  
6,147.457,rs951143,0.061  
6,147.576,rs9497474,0.055  
6,147.734,rs362845,0.043  
6,147.736,rs362848,0.043  
6,147.777,rs362856,0.039  
6,147.815,rs2942,0.041  
6,147.918,rs1575376,0.047  
6,148.035,rs4129313,0.061  
6,148.041,rs6905055,0.061  
6,148.143,rs259417,0.073  
6,148.156,rs259404,0.073  
6,148.267,rs2274170,0.060  
6,148.399,rs9403839,0.061  
6,148.459,rs1406537,0.064  
6,148.517,rs6907758,0.067  
6,148.696,rs694625,0.075  
6,148.949,rs6924763,0.083  
6,149.021,rs642527,0.086  
6,149.056,rs325105,0.086  
6,149.078,rs10447451,0.086  
6,149.092,rs635513,0.085

6,149.170,rs765153,0.087  
6,149.176,rs12203200,0.072  
6,149.230,rs844589,0.102  
6,149.289,rs9377064,0.094  
6,149.339,rs1302019,0.090  
6,149.358,rs9390488,0.088  
6,149.361,rs1523965,0.088  
6,149.388,rs9497839,0.096  
6,149.399,rs17077242,0.083  
6,149.477,rs7753767,0.074  
6,149.496,rs9377079,0.072  
6,149.553,rs12195214,0.054  
6,149.567,rs9386196,0.052  
6,149.595,rs1528868,0.048  
6,149.679,rs600222,0.039  
6,149.721,rs3915135,0.044  
6,149.840,rs2272450,0.056  
6,149.921,rs1934797,0.044  
6,149.928,rs1007475,0.043  
6,149.936,rs7764264,0.043  
6,149.989,rs7765680,0.046  
6,150.027,rs9322128,0.049  
6,150.071,rs6920454,0.039  
6,150.087,rs2328856,0.038  
6,150.096,rs9784873,0.038  
6,150.127,rs9373552,0.036  
6,150.184,rs9373554,0.033  
6,150.198,rs2493920,0.044  
6,150.215,rs4434491,0.044  
6,150.248,rs4445079,0.043  
6,150.282,rs9377127,0.039  
6,150.304,rs17078272,0.037  
6,150.343,rs10457832,0.034  
6,150.350,rs12196375,0.047  
6,150.374,rs17635342,0.049  
6,150.389,rs4243482,0.051  
6,150.431,rs6941174,0.044  
6,150.444,rs9399650,0.057  
6,150.452,rs12210132,0.056  
6,150.453,rs6930337,0.056  
6,150.454,rs4897015,0.056  
6,150.456,rs6570854,0.056  
6,150.490,rs1624157,0.055  
6,150.501,rs6931504,0.055  
6,150.510,rs9377143,0.045  
6,150.512,rs1147862,0.043  
6,150.526,rs1147857,0.044  
6,150.543,rs1465307,0.060  
6,150.550,rs9498061,0.050  
6,150.558,rs208696,0.042  
6,150.645,rs208707,0.063  
6,150.670,rs208704,0.081  
6,150.674,rs208702,0.082  
6,150.765,rs9377145,0.059  
6,150.766,rs6909404,0.058  
6,150.767,rs9390586,0.058  
6,150.807,rs9390588,0.066  
6,150.832,rs9498070,0.067  
6,151.025,rs7451498,0.066  
6,151.175,rs7453519,0.071  
6,151.308,rs4130936,0.051

6,151.329,rs9377155,0.048  
6,151.419,rs9498147,0.040  
6,151.493,rs17645564,0.035  
6,151.553,rs9386234,0.042  
6,151.583,rs7753810,0.047  
6,151.642,rs7751854,0.036  
6,151.786,rs2128332,0.042  
6,151.998,rs9498175,0.027  
6,152.057,rs12192351,0.012  
6,152.081,rs13215793,0.011  
6,152.087,rs9498176,0.011  
6,152.112,rs1156561,0.014  
6,152.114,rs17728886,0.014  
6,152.151,rs9390650,0.009  
6,152.264,rs6570947,0.003  
6,152.298,rs7766009,0.003  
6,152.315,rs616003,0.003  
6,152.327,rs6910470,0.003  
6,152.353,rs6570957,0.003  
6,152.484,rs2789503,0.004  
6,152.521,rs17733403,0.010  
6,152.528,rs17087579,0.011  
6,152.957,rs9371533,0.020  
6,153.030,rs6557200,0.016  
6,153.070,rs7773464,0.013  
6,153.088,rs9383633,0.013  
6,153.089,rs6922844,0.013  
6,153.146,rs644866,0.010  
6,153.152,rs4870236,0.009  
6,153.252,rs6916591,0.005  
6,153.277,rs9479762,0.014  
6,153.306,rs9397708,0.021  
6,153.325,rs6905409,0.027  
6,153.332,rs9397194,0.029  
6,153.349,rs7773289,0.032  
6,153.350,rs11759558,0.033  
6,153.392,rs4870386,0.044  
6,153.454,rs9397821,0.069  
6,153.487,rs9397264,0.073  
6,153.568,rs588036,0.081  
6,153.633,rs6917472,0.055  
6,153.661,rs742315,0.058  
6,153.789,rs7740233,0.045  
6,153.810,rs1122537,0.042  
6,153.815,rs9372074,0.043  
6,153.842,rs7750629,0.045  
6,153.882,rs12527099,0.049  
6,153.883,rs11155745,0.049  
6,153.888,rs6557548,0.050  
6,154.008,rs6919370,0.062  
6,154.213,rs712218,0.063  
6,154.221,rs6923505,0.067  
6,154.242,rs17080350,0.077  
6,154.272,rs761264,0.077  
6,154.302,rs6917461,0.075  
6,154.305,rs803407,0.076  
6,154.326,rs17427389,0.077  
6,154.467,rs4869953,0.081  
6,154.576,rs803456,0.076  
6,154.580,rs803455,0.076  
6,154.632,rs803447,0.072



6,154.739,rs569110,0.060  
6,154.823,rs505358,0.070  
6,154.915,rs9478918,0.059  
6,155.030,rs9397032,0.038  
6,155.050,rs9371494,0.038  
6,155.123,rs6934983,0.047  
6,155.138,rs4869988,0.049  
6,155.198,rs7771304,0.066  
6,155.244,rs4869991,0.081  
6,155.249,rs6909007,0.082  
6,155.258,rs942382,0.083  
6,155.345,rs752543,0.081  
6,155.384,rs9478984,0.078  
6,155.497,rs9478187,0.090  
6,155.551,rs4870002,0.075  
6,155.560,rs10499265,0.074  
6,155.635,rs17081009,0.084  
6,155.662,rs9383877,0.087  
6,155.702,rs10155709,0.080  
6,155.724,rs2473609,0.076  
6,155.734,rs9397389,0.077  
6,155.742,rs4870010,0.077  
6,155.743,rs926561,0.091  
6,155.747,rs12664268,0.090  
6,155.762,rs12210237,0.089  
6,155.766,rs12205375,0.089  
6,155.769,rs2347436,0.089  
6,156.163,rs11756337,0.090  
6,156.331,rs9479055,0.089  
6,156.411,rs7754143,0.086  
6,156.602,rs7752591,0.079  
6,156.742,rs980281,0.071  
6,156.926,rs3020306,0.078  
6,157.065,rs17081685,0.071  
6,157.155,rs11155813,0.051  
6,157.173,rs827423,0.052  
6,157.486,rs3020314,0.065  
6,157.583,rs9371236,0.068  
6,157.725,rs2982712,0.073  
6,157.804,rs12199102,0.071  
6,157.939,rs10484863,0.069  
6,157.964,rs2635475,0.077  
6,157.977,rs2348262,0.073  
6,157.982,rs6901280,0.075  
6,158.000,rs2813504,0.095  
6,158.052,rs2673776,0.118  
6,158.059,rs17082323,0.118  
6,158.064,rs3798756,0.117  
6,158.070,rs2763028,0.116  
6,158.098,rs1359323,0.112  
6,158.234,rs1408458,0.081  
6,158.248,rs9479288,0.077  
6,158.255,rs9371581,0.075  
6,158.267,rs9371583,0.073  
6,158.385,rs214955,0.051  
6,158.399,rs1933689,0.049  
6,158.527,rs214976,0.033  
6,158.718,rs9322378,0.026  
6,158.820,rs2695253,0.024  
6,159.094,rs1407267,0.026  
6,159.102,rs3823082,0.026

6,159.106,rs12201030,0.026  
6,159.123,rs671330,0.026  
6,159.140,rs606445,0.015  
6,159.151,rs596362,0.021  
6,159.223,rs311326,0.031  
6,159.236,rs17083085,0.032  
6,159.290,rs192846,0.032  
6,159.397,rs539107,0.036  
6,159.497,rs6915111,0.036  
6,159.554,rs3757066,0.037  
6,159.648,rs1292830,0.038  
6,159.683,rs9479488,0.037  
6,159.752,rs17083512,0.037  
6,159.904,rs1124016,0.036  
6,159.944,rs553072,0.036  
6,159.945,rs12153830,0.036  
6,159.966,rs315428,0.044  
6,160.013,rs1871400,0.043  
6,160.023,rs1890312,0.056  
6,160.027,rs317104,0.056  
6,160.079,rs7762618,0.057  
6,160.196,rs1479438,0.062  
6,160.263,rs2185276,0.063  
6,160.275,rs11969504,0.062  
6,160.321,rs1386208,0.056  
6,160.332,rs2790090,0.054  
6,160.628,rs11756366,0.014  
6,160.685,rs1154029,0.015  
6,160.876,rs9478457,0.007  
6,160.965,rs9397637,0.006  
6,161.071,rs1937580,0.006  
6,161.116,rs1892361,0.007  
6,161.196,rs10485262,0.011  
6,161.277,rs2065139,0.018  
6,161.292,rs581564,0.019  
6,161.320,rs574350,0.020  
6,161.345,rs9478495,0.021  
6,161.388,rs563649,0.023  
6,161.407,rs10485058,0.025  
6,161.416,rs518596,0.026  
6,161.417,rs483481,0.016  
6,161.421,rs4870268,0.006  
6,161.470,rs7759388,0.012  
6,161.494,rs4118099,0.017  
6,161.496,rs13193677,0.016  
6,161.515,rs2092417,0.011  
6,161.520,rs2499646,0.010  
6,161.526,rs742517,0.010  
6,161.531,rs761130,0.009  
6,161.548,rs11968059,0.010  
6,161.589,rs9397714,0.012  
6,161.629,rs3812243,0.015  
6,161.715,rs9397717,0.020  
6,161.818,rs7742597,0.024  
6,161.862,rs12194277,0.025  
6,161.908,rs6911971,0.024  
6,162.083,rs17085526,0.017  
6,162.355,rs9479923,0.008  
6,162.433,rs7738774,0.008  
6,162.476,rs9397197,0.011  
6,162.760,rs12523716,0.007

6,162.794,rs11156007,0.013  
6,162.817,rs7745332,0.014  
6,162.866,rs4869840,0.016  
6,162.893,rs9322494,0.017  
6,162.938,rs12210329,0.021  
6,162.939,rs9480006,0.021  
6,162.968,rs2498491,0.023  
6,163.062,rs4484531,0.027  
6,163.130,rs7774757,0.024  
6,163.161,rs11156008,0.022  
6,163.186,rs17085911,0.020  
6,163.445,rs931312,0.007  
6,163.534,rs2352150,0.002  
6,163.596,rs7770051,0.002  
6,163.618,rs9478621,0.004  
6,163.627,rs10081066,0.010  
6,163.756,rs2985700,0.002  
6,163.795,rs6557416,0.001  
6,163.911,rs335407,0.000  
6,163.928,rs335419,0.000  
6,164.039,rs9478648,0.002  
6,164.040,rs11966765,0.002  
6,164.059,rs231948,0.003  
6,164.091,rs2235668,0.003  
6,164.106,rs6919626,0.003  
6,164.115,rs2235674,0.002  
6,164.116,rs12661812,0.002  
6,164.117,rs9478652,0.003  
6,164.177,rs4869859,0.007  
6,164.198,rs9371379,0.013  
6,164.220,rs9371910,0.013  
6,164.367,rs12207602,0.012  
6,164.398,rs11967053,0.011  
6,164.407,rs9480206,0.017  
6,164.436,rs4128674,0.020  
6,164.459,rs9383776,0.023  
6,164.558,rs9384389,0.016  
6,164.672,rs6906938,0.014  
6,164.684,rs4591861,0.014  
6,164.774,rs6909234,0.015  
6,164.809,rs1584535,0.017  
6,164.850,rs1375714,0.021  
6,164.891,rs10499290,0.018  
6,164.986,rs7742923,0.013  
6,164.998,rs10499286,0.012  
6,165.051,rs2820406,0.011  
6,165.120,rs9478696,0.020  
6,165.147,rs9384450,0.019  
6,165.170,rs9480304,0.018  
6,165.202,rs7739135,0.018  
6,165.261,rs9384456,0.015  
6,165.353,rs2819091,0.005  
6,165.388,rs2045138,0.008  
6,165.577,rs288956,0.000  
6,165.661,rs11156119,-0.000  
6,165.750,rs9384488,-0.001  
6,165.801,rs2151884,-0.000  
6,165.917,rs158258,-0.002  
6,166.033,rs6909426,-0.006  
6,166.091,rs4318894,-0.011  
6,166.097,rs9397995,-0.012

6,166.101,rs7763624,-0.012  
6,166.103,rs13205126,-0.012  
6,166.122,rs17088158,-0.011  
6,166.123,rs10457101,-0.017  
6,166.138,rs1007250,-0.017  
6,166.519,rs183048,-0.003  
6,166.542,rs2365386,-0.002  
6,166.543,rs733207,-0.002  
6,166.567,rs924928,-0.001  
6,166.703,rs9355891,-0.001  
6,166.711,rs7765247,-0.001  
6,166.728,rs1864500,-0.002  
6,166.730,rs1753196,-0.002  
6,166.731,rs16900421,-0.001  
6,166.732,rs2770113,-0.000  
6,166.737,rs2803358,-0.000  
6,166.739,rs2803362,0.000  
6,166.757,rs2770104,0.001  
6,166.821,rs9356167,0.000  
6,166.856,rs12202135,0.000  
6,166.857,rs9459093,-0.000  
6,166.888,rs16900563,-0.000  
6,166.891,rs2502620,-0.000  
6,166.923,rs2502601,-0.000  
6,166.952,rs9459503,-0.000  
6,167.012,rs9348153,-0.000  
6,167.017,rs6929952,-0.000  
6,167.500,rs600752,-0.001  
6,167.552,rs7753885,-0.001  
6,167.743,rs1545217,-0.002  
6,167.917,rs317802,-0.002  
6,168.017,rs9456343,-0.002  
6,168.044,rs9457456,-0.002  
6,168.149,rs3102971,-0.001  
6,168.287,rs3127158,-0.000  
6,168.304,rs2129211,0.001  
6,168.402,rs9457507,0.002  
6,168.445,rs12662184,0.003  
6,168.724,rs1738074,0.013  
6,168.820,rs6900680,0.017  
6,168.829,rs3120629,0.017  
6,168.834,rs12209018,0.018  
6,168.855,rs2485368,0.020  
6,168.907,rs2451244,0.020  
6,168.919,rs2485328,0.015  
6,169.087,rs12526577,0.008  
6,169.301,rs905684,0.003  
6,169.350,rs9365046,0.003  
6,169.403,rs9365049,0.003  
6,169.433,rs6455633,0.003  
6,169.491,rs9295098,0.003  
6,169.544,rs16890289,0.003  
6,169.567,rs4709321,0.004  
6,169.568,rs4709322,0.004  
6,169.590,rs4521619,0.009  
6,169.633,rs6901745,0.011  
6,169.756,rs409359,0.011  
6,169.760,rs9295103,0.012  
6,169.761,rs378512,0.014  
6,169.763,rs10945617,0.018  
6,169.779,rs240877,0.017

6,169.816,rs7754295,0.006  
6,169.817,rs2842997,0.006  
6,169.820,rs2842994,0.005  
6,169.890,rs6929124,0.001  
6,169.904,rs876380,0.001  
6,169.907,rs6902339,0.002  
6,169.909,rs11965350,0.003  
6,170.000,rs3798189,0.000  
6,170.015,rs688359,0.000  
6,170.029,rs8191890,0.000  
6,170.036,rs3798176,0.000  
6,170.038,rs3777401,0.000  
6,170.058,rs3798174,-0.000  
6,170.061,rs6937722,-0.000  
6,170.069,rs1443844,0.000  
6,170.072,rs4646283,0.000  
6,170.086,rs791183,0.002  
6,170.128,rs7761031,0.002  
6,170.171,rs9346816,0.001  
6,170.217,rs2504926,0.000  
6,170.296,rs7761293,0.000  
6,170.466,rs10945682,0.002  
6,170.532,rs6935921,0.003  
6,170.580,rs9295131,0.003  
6,170.583,rs783147,0.003  
6,170.595,rs1853025,0.004  
6,170.657,rs1084656,0.006  
6,170.907,rs1247330,0.014  
6,170.969,rs1530395,0.014  
6,171.022,rs657030,0.013  
6,171.208,rs9347479,0.007  
6,171.239,rs7754196,0.005  
6,171.256,rs2272197,0.004  
6,171.292,rs2293286,0.006  
6,171.304,rs3734462,0.003  
6,171.346,rs6934457,0.005  
6,171.354,rs729986,0.005  
6,171.380,rs3798925,0.005  
6,171.506,rs3798943,0.001  
6,171.552,rs374255,0.002  
6,171.561,rs1077281,0.002  
6,171.569,rs1080085,0.002  
6,171.589,rs11758285,0.001  
6,171.592,rs1407211,0.001  
6,171.601,rs9347493,0.001  
6,171.708,rs7766508,0.001  
6,171.785,rs13202365,0.001  
6,171.792,rs4454114,0.001  
6,171.800,rs13211741,0.001  
6,171.801,rs9355898,0.001  
6,171.834,rs6904671,0.011  
6,171.836,rs12154057,0.011  
6,171.840,rs17647823,0.012  
6,171.843,rs9456674,0.012  
6,171.964,rs2223768,0.051  
6,171.983,rs480557,0.057  
6,171.995,rs475221,0.058  
6,171.998,rs530128,0.058  
6,172.028,rs9346868,0.060  
6,172.051,rs9365300,0.062  
6,172.197,rs6455744,0.088

6,172.249,rs9458331,0.097  
6,172.305,rs9364608,0.100  
6,172.333,rs6921226,0.095  
6,172.348,rs11962671,0.093  
6,172.393,rs2180025,0.067  
6,172.415,rs16893004,0.066  
6,172.478,rs10945778,0.068  
6,172.494,rs3019435,0.069  
6,172.543,rs7739802,0.077  
6,172.584,rs7738279,0.057  
6,172.616,rs3798218,0.053  
6,172.685,rs9347553,0.055  
6,172.709,rs9458413,0.060  
6,172.763,rs9458419,0.094  
6,172.992,rs7738197,0.110  
6,173.042,rs2187198,0.114  
6,173.215,rs6917371,0.116  
6,173.511,rs4605857,0.119  
6,173.708,rs9355987,0.138  
6,173.734,rs11961127,0.145  
6,173.760,rs12529283,0.152  
6,173.843,rs2023073,0.142  
6,174.027,rs6922813,0.154  
6,174.265,rs952388,0.168  
6,174.329,rs4709595,0.166  
6,174.605,rs2142524,0.159  
6,174.614,rs12661450,0.159  
6,174.625,rs4709619,0.159  
6,174.658,rs1893107,0.139  
6,174.832,rs1893540,0.135  
6,174.990,rs1333955,0.132  
6,174.998,rs1041632,0.132  
6,175.078,rs6936963,0.112  
6,175.102,rs9347700,0.115  
6,175.109,rs1877771,0.135  
6,175.116,rs915013,0.133  
6,175.195,rs4329088,0.112  
6,175.263,rs3939989,0.120  
6,175.362,rs536980,0.156  
6,175.366,rs2476468,0.158  
6,175.374,rs566126,0.159  
6,175.406,rs12197200,0.182  
6,175.437,rs1008295,0.171  
6,175.439,rs6907521,0.170  
6,175.459,rs9458753,0.169  
6,175.483,rs6922754,0.167  
6,175.500,rs2294458,0.148  
6,175.535,rs7750165,0.121  
6,175.545,rs13200025,0.116  
6,175.553,rs7768540,0.117  
6,175.560,rs742333,0.119  
6,175.563,rs4709698,0.121  
6,175.573,rs12197625,0.144  
6,175.575,rs12529659,0.148  
6,175.576,rs9346956,0.150  
6,175.578,rs9306,0.150  
6,175.591,rs2321514,0.140  
6,175.609,rs760886,0.118  
6,175.621,rs9364686,0.105  
6,175.631,rs13220178,0.100  
6,175.651,rs4709714,0.114

6,175.700,rs2759386,0.117  
6,175.722,rs9458828,0.119  
6,175.889,rs7761240,0.123  
6,175.906,rs10945909,0.127  
6,175.913,rs9355432,0.129  
6,175.932,rs1983789,0.138  
6,175.949,rs9364696,0.144  
6,175.978,rs1407662,0.144  
6,176.070,rs6926801,0.120  
6,176.146,rs9347792,0.107  
6,176.186,rs17441835,0.104  
6,176.233,rs4709786,0.101  
6,176.293,rs6921880,0.132  
6,176.307,rs6928944,0.132  
6,176.309,rs12205431,0.130  
6,176.332,rs6910079,0.113  
6,176.353,rs9456909,0.129  
6,176.448,rs9355453,0.092  
6,176.454,rs2064793,0.090  
6,176.556,rs3752534,0.055  
6,176.569,rs206686,0.053  
6,176.585,rs9347819,0.051  
6,176.610,rs17550239,0.049  
6,176.624,rs9346995,0.050  
6,176.663,rs807897,0.045  
6,176.772,rs794108,0.035  
6,176.811,rs12525909,0.053  
6,176.815,rs705779,0.054  
6,176.888,rs9347838,0.064  
6,177.113,rs6903174,0.045  
6,177.236,rs9347879,0.035  
6,177.278,rs727811,0.033  
6,177.374,rs1390469,0.025  
6,177.463,rs7747058,0.018  
6,177.548,rs9356281,0.018  
6,177.583,rs9365785,0.015  
6,177.627,rs6923885,0.010  
6,177.649,rs7764525,0.007  
6,177.660,rs1227989,0.007  
6,177.808,rs2146032,0.008  
6,177.838,rs2066897,0.007  
6,177.900,rs17490175,0.007  
6,177.917,rs568444,0.006  
6,177.946,rs2758932,0.004  
6,178.038,rs1764047,0.002  
6,178.047,rs6923393,0.006  
6,178.164,rs4324759,0.013  
6,178.325,rs9459407,0.016  
6,178.333,rs16897782,0.017  
6,178.364,rs220772,0.028  
6,178.379,rs578654,0.022  
6,178.388,rs9459417,0.023  
6,178.428,rs221746,0.026  
6,178.434,rs9364795,0.027  
6,178.451,rs221735,0.029  
6,178.453,rs221726,0.029  
6,178.540,rs4709946,0.069  
6,178.690,rs9457107,0.072  
6,178.694,rs844157,0.059  
6,178.763,rs2983500,0.059  
6,178.795,rs9459464,0.059

6,178.874,rs9365900,0.048  
6,178.893,rs875590,0.035  
6,178.924,rs3008061,0.034  
6,179.025,rs9356381,0.034  
6,179.026,rs4424058,0.034  
6,179.057,rs9459484,0.034  
6,179.098,rs4463239,0.034  
6,179.303,rs2323029,0.035  
6,179.359,rs4709984,0.037  
6,179.364,rs6928719,0.063  
6,179.473,rs9348048,0.041  
6,179.565,rs9364819,0.025  
6,179.605,rs9348050,0.019  
6,179.616,rs7751553,0.019  
6,179.780,rs2500475,0.018  
6,179.896,rs4472324,0.016  
6,179.981,rs93622,0.017  
6,180.081,rs9364827,0.019  
6,180.122,rs300122,0.020  
6,180.156,rs12209946,0.022  
6,180.242,rs9348064,0.026  
6,180.771,rs3099266,0.072  
6,180.914,rs6456056,0.076  
6,181.066,rs9365980,0.073  
6,181.109,rs4367352,0.072  
6,181.123,rs6940834,0.090  
6,181.169,rs9355566,0.092  
6,181.397,rs4709111,0.069  
6,181.687,rs6925364,0.048  
6,181.963,rs3817777,0.039  
6,182.007,rs2071941,0.041  
6,182.150,rs6918886,0.053  
6,182.298,rs960145,0.046  
6,182.386,rs9355586,0.046  
6,182.559,rs6921577,0.052  
6,182.605,rs9459715,0.052  
6,182.621,rs6456102,0.052  
6,182.639,rs6911624,0.052  
6,182.660,rs4710081,0.052  
6,182.736,rs7770200,0.051  
6,182.766,rs1883361,0.042  
6,182.812,rs9347154,0.045  
6,182.827,rs409161,0.046  
6,182.856,rs533810,0.047  
6,182.973,rs1099646,0.052  
6,183.293,rs6933508,0.041  
6,183.923,rs6456156,0.037  
6,183.937,rs1015077,0.037  
6,183.995,rs3798315,0.037  
6,184.007,rs3093012,0.037  
6,184.066,rs9459893,0.037  
6,184.250,rs9364896,0.035  
6,184.439,rs4710230,0.019  
6,184.654,rs2981977,0.013  
6,184.688,rs9457305,0.012  
6,184.852,rs6455553,0.004  
6,184.877,rs6455560,0.009  
6,184.888,rs9364939,0.008  
6,185.465,rs4708591,0.023  
6,185.954,rs1132306,0.028  
6,186.029,rs6900844,0.023



6,186.043,rs3752611,0.025  
6,186.099,rs9455933,0.019  
6,186.150,rs3734896,0.022  
6,186.212,rs902385,0.028  
6,186.256,rs4708652,0.034  
6,186.284,rs1565441,0.025  
6,186.287,rs6931528,0.016  
6,186.310,rs6916885,0.019  
6,186.313,rs6927982,0.021  
6,186.322,rs4708676,0.022  
6,186.358,rs6941655,0.022  
6,186.495,rs9346536,0.020  
6,186.516,rs6924059,0.020  
6,186.548,rs2054476,0.020  
6,186.580,rs7750101,0.019  
6,186.608,rs4292501,0.018  
6,186.877,rs9364457,0.002  
6,186.918,rs2609326,0.001  
6,186.947,rs5016787,-0.000  
6,186.982,rs13205533,-0.001  
6,186.998,rs2180346,-0.001  
6,187.038,rs2342630,-0.002  
6,187.045,rs6455534,-0.002  
6,187.111,rs6913757,-0.003  
6,187.163,rs4708481,-0.004  
6,187.176,rs6931082,-0.004  
6,187.339,rs196506,-0.008  
6,187.425,rs9355010,-0.013  
6,187.490,rs10945314,-0.017  
6,187.611,rs4708389,-0.020  
6,187.691,rs9346596,-0.017  
6,187.725,rs3818701,-0.017  
6,187.787,rs7766847,-0.015  
6,187.839,rs10945359,-0.013  
6,187.861,rs7765333,-0.013  
6,187.867,rs17182988,-0.013  
6,187.907,rs9294949,-0.011  
6,187.938,rs12179836,-0.010  
6,187.978,rs9294955,-0.010  
6,187.996,rs2093524,-0.010  
6,188.072,rs4708599,-0.005  
6,188.151,rs7764005,-0.002  
6,188.168,rs8089,-0.002  
6,188.193,rs6940420,-0.002  
6,188.202,rs9283850,-0.002  
6,188.213,rs9379341,-0.001  
6,188.235,rs6605524,0.001  
6,188.254,rs9379335,0.001  
6,188.313,rs13215678,0.005  
6,188.426,rs9283855,0.003  
6,188.729,rs2473445,0.009  
6,188.883,rs4716393,0.011  
6,189.024,rs4134409,0.013  
6,189.087,rs6940159,0.015  
6,189.148,rs11753530,0.013  
6,189.257,rs4710698,0.004  
6,189.279,rs719960,0.002  
6,189.466,rs745285,-0.001  
6,189.483,rs6456183,-0.002  
6,189.496,rs7763013,-0.002  
6,189.533,rs2144671,-0.001

6,189.683,rs4710723,-0.001  
6,189.711,rs10946273,-0.001  
6,189.734,rs9460196,-0.001  
6,189.816,rs12207633,-0.001  
6,189.819,rs4314481,-0.001  
6,189.822,rs12205313,-0.001  
7,2.331,rs3924854,0.640  
7,2.370,rs7806249,0.557  
7,2.397,rs11185556,0.522  
7,2.414,rs3923903,0.500  
7,2.505,rs6583351,0.441  
7,2.521,rs4916935,0.467  
7,2.526,rs12718123,0.488  
7,3.525,rs6461378,0.526  
7,3.765,rs9639696,0.468  
7,3.911,rs4236375,0.454  
7,4.016,rs1880297,0.453  
7,4.022,rs17234336,0.451  
7,4.068,rs17151803,0.414  
7,4.123,rs13241427,0.369  
7,4.163,rs2690262,0.370  
7,4.185,rs11763092,0.376  
7,4.301,rs3934914,0.393  
7,4.357,rs10267348,0.424  
7,4.526,rs6463900,0.520  
7,4.589,rs10244477,0.530  
7,4.600,rs10274145,0.536  
7,4.622,rs1275,0.548  
7,4.697,rs12703010,0.626  
7,4.801,rs4720940,0.676  
7,5.224,rs10950503,0.741  
7,5.330,rs10950536,0.749  
7,5.531,rs3800933,0.840  
7,5.561,rs1626670,0.867  
7,5.609,rs4721524,0.908  
7,5.657,rs10950641,0.948  
7,5.727,rs12699855,0.997  
7,5.744,rs7801817,1.005  
7,5.824,rs6952809,1.040  
7,5.942,rs2906142,1.058  
7,6.054,rs1550202,1.064  
7,6.057,rs10488610,1.065  
7,6.061,rs1036504,1.067  
7,6.119,rs3735109,1.024  
7,6.139,rs12537408,1.059  
7,6.141,rs17132513,1.060  
7,6.149,rs4721900,1.068  
7,6.233,rs7776527,1.148  
7,6.339,rs208346,1.199  
7,6.633,rs2527521,1.221  
7,6.706,rs6957938,1.210  
7,6.782,rs6948739,1.123  
7,6.953,rs1713910,1.144  
7,7.010,rs10225022,1.095  
7,7.033,rs7806365,1.076  
7,7.154,rs1878808,1.064  
7,7.268,rs10236776,1.026  
7,7.278,rs6461781,1.027  
7,7.328,rs1843939,1.044  
7,7.330,rs17238159,1.031  
7,7.340,rs6461796,0.932

7,7.347,rs10951010,0.893  
7,7.355,rs6953573,0.904  
7,7.376,rs6461814,0.899  
7,7.385,rs7780988,0.900  
7,7.451,rs6943837,0.867  
7,7.459,rs4722435,0.871  
7,7.500,rs6964682,0.918  
7,7.575,rs10272892,0.950  
7,7.654,rs6947894,1.056  
7,7.760,rs4316064,1.174  
7,7.891,rs11972454,1.194  
7,7.997,rs10499335,1.200  
7,8.075,rs6944958,1.077  
7,8.130,rs9791502,1.091  
7,8.291,rs6462225,1.143  
7,8.512,rs10215031,1.139  
7,8.530,rs10228937,1.128  
7,8.584,rs4236342,1.084  
7,8.606,rs625537,1.094  
7,8.625,rs610962,1.009  
7,8.628,rs17134653,1.008  
7,8.643,rs1044701,0.979  
7,8.652,rs11762889,1.013  
7,8.656,rs10488357,1.081  
7,8.665,rs2097884,1.089  
7,8.672,rs2158629,1.091  
7,8.678,rs7794252,1.105  
7,8.703,rs17134816,1.117  
7,8.773,rs6958864,1.055  
7,8.871,rs11971741,1.062  
7,8.976,rs1117769,1.094  
7,9.188,rs12701792,1.100  
7,9.383,rs1001396,1.058  
7,9.396,rs9791644,1.054  
7,9.415,rs4720386,1.049  
7,9.495,rs4523152,1.029  
7,9.509,rs6973046,1.019  
7,9.570,rs12701915,0.970  
7,9.571,rs9690101,0.920  
7,9.815,rs3763381,0.789  
7,9.943,rs6463152,0.774  
7,9.964,rs13222836,0.819  
7,10.252,rs7826,0.862  
7,10.441,rs4585633,0.894  
7,10.561,rs7798496,0.921  
7,10.633,rs13227672,0.864  
7,10.846,rs4236378,0.857  
7,10.880,rs4720539,0.856  
7,10.977,rs6463343,0.803  
7,11.046,rs6958502,0.747  
7,11.073,rs3889348,0.753  
7,11.131,rs6943227,0.785  
7,11.151,rs10278799,0.798  
7,11.227,rs4724592,0.794  
7,11.265,rs6945065,0.790  
7,11.327,rs4724662,0.795  
7,11.504,rs4720630,0.729  
7,11.563,rs6964614,0.717  
7,11.640,rs7808325,0.686  
7,11.904,rs852540,0.622  
7,11.941,rs6946228,0.606

7,12.044,rs4724712,0.621  
7,12.165,rs4724739,0.626  
7,12.204,rs308074,0.639  
7,12.362,rs6979676,0.711  
7,12.422,rs591982,0.749  
7,12.510,rs1017035,0.839  
7,12.524,rs10240988,0.839  
7,12.632,rs11764399,0.790  
7,12.659,rs2113628,0.789  
7,12.666,rs6952125,0.786  
7,12.741,rs836556,0.768  
7,12.856,rs1105664,0.730  
7,12.901,rs7800401,0.713  
7,12.969,rs2253869,0.695  
7,13.026,rs17789894,0.690  
7,13.041,rs6944332,0.682  
7,13.206,rs4236396,0.565  
7,13.261,rs10253555,0.588  
7,13.353,rs10250073,0.510  
7,13.400,rs10260787,0.496  
7,13.432,rs7801523,0.502  
7,13.438,rs919681,0.505  
7,13.533,rs10259085,0.575  
7,13.595,rs6463669,0.592  
7,13.596,rs1317198,0.593  
7,13.606,rs1548774,0.568  
7,13.610,rs17166296,0.559  
7,13.650,rs6974119,0.524  
7,14.920,rs2024372,0.450  
7,14.948,rs11984316,0.439  
7,14.988,rs17137415,0.398  
7,15.002,rs11761203,0.392  
7,15.006,rs10276762,0.375  
7,15.011,rs7357092,0.355  
7,15.043,rs6944658,0.307  
7,15.058,rs6958354,0.310  
7,15.125,rs10249817,0.368  
7,15.154,rs11762146,0.410  
7,15.168,rs12533670,0.410  
7,15.173,rs17494426,0.408  
7,15.211,rs7795698,0.396  
7,15.278,rs6463740,0.380  
7,15.365,rs7785709,0.371  
7,15.396,rs10243568,0.361  
7,15.458,rs10251201,0.399  
7,15.481,rs6950165,0.397  
7,15.499,rs17140599,0.396  
7,15.551,rs37967,0.387  
7,15.590,rs715377,0.382  
7,15.857,rs6964558,0.335  
7,15.937,rs17401797,0.324  
7,16.006,rs4720763,0.327  
7,16.050,rs10156091,0.325  
7,16.058,rs3757524,0.325  
7,16.075,rs3757523,0.326  
7,16.099,rs6463778,0.320  
7,16.133,rs881451,0.345  
7,16.190,rs10952094,0.338  
7,16.206,rs10486213,0.289  
7,16.217,rs3807822,0.276  
7,16.234,rs3779363,0.292

7,16.264,rs7796406,0.267  
7,16.297,rs3779360,0.235  
7,16.328,rs3807814,0.238  
7,16.414,rs2349178,0.284  
7,16.425,rs12333784,0.288  
7,16.436,rs6969069,0.289  
7,16.436,rs7801871,0.289  
7,16.440,rs2056449,0.290  
7,16.441,rs12670364,0.290  
7,16.465,rs12666065,0.292  
7,16.589,rs6463799,0.305  
7,16.633,rs10242397,0.304  
7,16.871,rs7805772,0.267  
7,16.923,rs2040891,0.265  
7,17.003,rs6977578,0.290  
7,17.004,rs6978212,0.289  
7,17.040,rs2189903,0.273  
7,17.068,rs13438215,0.262  
7,17.200,rs6956624,0.267  
7,17.206,rs10227474,0.269  
7,17.288,rs4538793,0.286  
7,17.294,rs6974213,0.287  
7,17.516,rs11769942,0.353  
7,17.519,rs2057789,0.288  
7,17.548,rs17153994,0.254  
7,17.565,rs11536481,0.249  
7,17.567,rs7782816,0.251  
7,17.577,rs1981558,0.256  
7,17.671,rs6463839,0.296  
7,17.687,rs886505,0.289  
7,17.729,rs10268580,0.207  
7,17.781,rs10228121,0.216  
7,17.870,rs10486259,0.224  
7,17.900,rs2349786,0.225  
7,18.200,rs11984397,0.187  
7,18.234,rs17414932,0.185  
7,18.265,rs6961566,0.247  
7,18.287,rs10237048,0.230  
7,18.295,rs10249915,0.212  
7,18.306,rs887938,0.208  
7,18.332,rs10255740,0.207  
7,18.359,rs17158339,0.189  
7,18.372,rs12702828,0.187  
7,18.427,rs17158514,0.173  
7,18.437,rs1030008,0.169  
7,18.504,rs13242973,0.168  
7,18.538,rs12702844,0.176  
7,18.605,rs2286111,0.203  
7,18.670,rs293185,0.209  
7,18.686,rs2107755,0.186  
7,18.763,rs7791753,0.177  
7,18.811,rs2057847,0.178  
7,18.895,rs4720829,0.183  
7,18.990,rs7777070,0.189  
7,19.181,rs17161552,0.223  
7,19.263,rs11773271,0.237  
7,19.602,rs2251806,0.293  
7,19.659,rs9918508,0.289  
7,19.785,rs10216270,0.284  
7,19.905,rs2657237,0.273  
7,19.955,rs1032873,0.266

7,20.062,rs4273764,0.256  
7,20.170,rs320794,0.229  
7,20.377,rs1620397,0.169  
7,20.385,rs728260,0.170  
7,20.398,rs2915156,0.163  
7,20.401,rs9648642,0.161  
7,20.411,rs2971028,0.155  
7,20.492,rs6973780,0.148  
7,20.678,rs10236225,0.144  
7,20.776,rs7808481,0.137  
7,20.808,rs16876522,0.135  
7,20.818,rs16876525,0.134  
7,20.865,rs4725269,0.137  
7,21.015,rs2882836,0.176  
7,21.027,rs12703012,0.176  
7,21.029,rs1524240,0.176  
7,21.309,rs6962705,0.172  
7,21.472,rs7784127,0.169  
7,21.484,rs4720903,0.168  
7,21.529,rs979058,0.167  
7,21.604,rs968793,0.164  
7,21.625,rs10239619,0.163  
7,21.699,rs17163764,0.145  
7,21.885,rs17163925,0.149  
7,21.940,rs2906553,0.152  
7,22.046,rs7786061,0.164  
7,22.081,rs10440995,0.168  
7,22.120,rs2714402,0.175  
7,22.170,rs7812248,0.156  
7,22.174,rs10281406,0.151  
7,22.175,rs10281444,0.151  
7,22.214,rs9771478,0.134  
7,22.226,rs6978700,0.134  
7,22.273,rs916906,0.118  
7,22.410,rs4720986,0.121  
7,22.460,rs39186,0.122  
7,22.495,rs10486135,0.117  
7,22.503,rs2189311,0.119  
7,22.567,rs10242744,0.133  
7,22.569,rs2074603,0.133  
7,22.638,rs17574506,0.139  
7,22.693,rs2681050,0.129  
7,22.739,rs17164930,0.201  
7,22.755,rs2074598,0.228  
7,22.756,rs2074597,0.224  
7,22.759,rs2526099,0.182  
7,22.774,rs12699252,0.185  
7,23.004,rs1467344,0.154  
7,23.081,rs7783055,0.146  
7,23.273,rs2883597,0.116  
7,23.304,rs10215881,0.112  
7,23.387,rs6943159,0.113  
7,23.610,rs719680,0.127  
7,23.683,rs2215983,0.131  
7,23.715,rs2215994,0.132  
7,23.787,rs7789227,0.140  
7,23.788,rs2192745,0.140  
7,23.911,rs4721050,0.160  
7,24.019,rs6966915,0.158  
7,24.048,rs10225421,0.186  
7,24.236,rs10270435,0.200

7,24.328,rs1371601,0.207  
7,24.402,rs847914,0.208  
7,24.436,rs7804782,0.205  
7,24.441,rs1992309,0.203  
7,24.521,rs17166188,0.185  
7,24.540,rs6967031,0.174  
7,24.588,rs886890,0.161  
7,24.613,rs2691815,0.164  
7,24.622,rs1180398,0.204  
7,24.623,rs1017405,0.205  
7,24.649,rs4445118,0.188  
7,24.656,rs10488226,0.177  
7,24.678,rs2241748,0.174  
7,24.698,rs7789919,0.176  
7,24.714,rs17616207,0.178  
7,24.781,rs17617404,0.185  
7,24.785,rs702478,0.184  
7,24.934,rs10224102,0.198  
7,24.992,rs6957008,0.201  
7,25.007,rs4721160,0.201  
7,25.013,rs246831,0.202  
7,25.061,rs6964353,0.175  
7,25.174,rs7778616,0.158  
7,25.273,rs2108929,0.143  
7,25.337,rs7784835,0.133  
7,25.439,rs10279810,0.096  
7,25.455,rs2884164,0.091  
7,25.467,rs10950444,0.090  
7,25.502,rs11975497,0.093  
7,25.561,rs17707307,0.087  
7,25.733,rs1594613,0.075  
7,25.773,rs10242586,0.058  
7,25.794,rs2723454,0.057  
7,25.859,rs2692464,0.056  
7,25.928,rs2357705,0.056  
7,25.979,rs10230686,0.059  
7,26.000,rs1581567,0.058  
7,26.010,rs10807768,0.059  
7,26.072,rs10243935,0.033  
7,26.126,rs7783357,0.039  
7,26.130,rs17167368,0.039  
7,26.135,rs2848839,0.038  
7,26.169,rs2568639,0.041  
7,26.198,rs6964915,0.044  
7,26.215,rs4719379,0.049  
7,26.253,rs6461048,0.067  
7,26.298,rs7794026,0.068  
7,26.382,rs10281229,0.056  
7,26.428,rs252001,0.057  
7,26.443,rs722661,0.052  
7,26.489,rs10268584,0.046  
7,26.507,rs2237292,0.045  
7,26.519,rs3801091,0.044  
7,26.540,rs10085783,0.044  
7,26.589,rs7800918,0.042  
7,26.634,rs4721290,0.030  
7,26.794,rs2884306,0.021  
7,26.848,rs12533882,0.026  
7,26.852,rs17167869,0.026  
7,26.863,rs2357842,0.027  
7,26.865,rs10251605,0.028

7,26.924,rs17167930,0.031  
7,26.960,rs7780524,0.028  
7,26.970,rs6949550,0.020  
7,27.017,rs17167959,0.017  
7,27.040,rs17708126,0.016  
7,27.065,rs12539033,0.014  
7,27.081,rs7799548,0.013  
7,27.085,rs10252549,0.013  
7,27.132,rs40450,0.018  
7,27.186,rs969690,0.019  
7,27.222,rs6944473,0.018  
7,27.257,rs13242229,0.017  
7,27.310,rs2116532,0.021  
7,27.471,rs10239079,0.019  
7,27.526,rs10236653,0.018  
7,27.619,rs10499451,0.020  
7,27.669,rs16878221,0.022  
7,27.771,rs17168320,0.023  
7,27.820,rs2462566,0.024  
7,27.860,rs1404613,0.025  
7,28.086,rs16878281,0.055  
7,28.314,rs17168538,0.096  
7,28.316,rs40628,0.097  
7,28.337,rs36914,0.098  
7,28.425,rs6972083,0.130  
7,28.438,rs11514706,0.132  
7,28.472,rs218066,0.136  
7,28.534,rs10262813,0.141  
7,28.561,rs11760836,0.150  
7,28.643,rs9639223,0.175  
7,28.677,rs12699686,0.163  
7,28.840,rs10258070,0.139  
7,28.865,rs4377857,0.138  
7,28.905,rs4074352,0.137  
7,29.054,rs2389409,0.144  
7,29.140,rs2196395,0.136  
7,29.219,rs2237494,0.115  
7,29.222,rs6969519,0.115  
7,29.289,rs6461202,0.114  
7,29.327,rs17169004,0.138  
7,29.340,rs10226819,0.140  
7,29.344,rs10272623,0.140  
7,29.360,rs12670755,0.174  
7,29.361,rs6957483,0.174  
7,29.410,rs917625,0.177  
7,29.424,rs12113594,0.190  
7,29.464,rs11768573,0.223  
7,29.507,rs1942645,0.232  
7,29.644,rs6953206,0.241  
7,29.851,rs1527206,0.258  
7,30.046,rs2526604,0.267  
7,30.068,rs7789712,0.266  
7,30.151,rs10257743,0.262  
7,30.201,rs2528472,0.259  
7,30.228,rs917221,0.260  
7,30.229,rs9639262,0.260  
7,30.286,rs477644,0.256  
7,30.298,rs2389674,0.291  
7,30.318,rs562687,0.267  
7,30.341,rs523615,0.297  
7,30.379,rs12670185,0.298



7,30.381,rs4719474,0.298  
7,30.408,rs696279,0.263  
7,30.416,rs17169573,0.261  
7,30.446,rs6977880,0.252  
7,30.448,rs706041,0.280  
7,30.504,rs1674802,0.361  
7,30.515,rs818803,0.351  
7,30.545,rs3807496,0.347  
7,30.547,rs12112188,0.380  
7,30.575,rs706078,0.435  
7,30.656,rs4370433,0.527  
7,30.663,rs17136772,0.573  
7,30.663,rs6968539,0.574  
7,30.664,rs6969383,0.575  
7,30.706,rs16871504,0.565  
7,30.768,rs847440,0.532  
7,30.827,rs1523632,0.513  
7,30.867,rs672365,0.475  
7,30.876,rs10243674,0.466  
7,30.879,rs12699826,0.466  
7,30.899,rs7801891,0.460  
7,30.902,rs940823,0.458  
7,30.956,rs6944767,0.478  
7,30.983,rs11773260,0.473  
7,31.036,rs4552804,0.462  
7,31.064,rs1476081,0.461  
7,31.201,rs10950657,0.496  
7,31.250,rs1077773,0.519  
7,31.262,rs6977113,0.522  
7,31.331,rs524715,0.538  
7,31.340,rs17137763,0.534  
7,31.351,rs13239692,0.535  
7,31.521,rs10268888,0.667  
7,31.536,rs10242846,0.677  
7,31.542,rs6963617,0.678  
7,31.570,rs1448672,0.731  
7,31.658,rs10260737,0.746  
7,31.674,rs2075083,0.747  
7,31.695,rs2389833,0.773  
7,31.711,rs7786114,0.787  
7,31.723,rs17138233,0.783  
7,31.744,rs2723535,0.784  
7,31.756,rs2140711,0.789  
7,31.971,rs11766489,0.861  
7,32.065,rs7804628,0.872  
7,32.102,rs2049726,0.868  
7,32.239,rs1178375,0.895  
7,32.270,rs917325,0.902  
7,32.391,rs17419156,1.011  
7,32.447,rs13228023,1.050  
7,32.480,rs11977093,1.085  
7,32.513,rs17347800,1.120  
7,32.519,rs10243618,1.126  
7,32.633,rs1726614,1.106  
7,32.667,rs1554774,1.101  
7,32.671,rs3801986,1.100  
7,32.687,rs2519890,1.092  
7,32.764,rs1178118,1.022  
7,32.825,rs13241957,0.978  
7,32.855,rs6963568,0.896  
7,32.881,rs2520361,0.862

7,32.912,rs756853,0.796  
7,32.949,rs10252839,0.804  
7,32.956,rs10278449,0.805  
7,32.960,rs10272709,0.787  
7,32.960,rs11764843,0.781  
7,32.963,rs13438248,0.775  
7,32.986,rs2214850,0.728  
7,32.986,rs6972136,0.728  
7,33.008,rs11767043,0.776  
7,33.048,rs4413678,0.775  
7,33.051,rs10268180,0.775  
7,33.068,rs2074633,0.778  
7,33.172,rs10225279,0.791  
7,33.217,rs1157350,0.752  
7,33.357,rs10253752,0.764  
7,33.572,rs7811056,0.778  
7,33.635,rs1548825,0.778  
7,33.697,rs1476944,0.780  
7,33.731,rs6955902,0.774  
7,33.753,rs2215857,0.770  
7,34.006,rs7802120,0.719  
7,34.019,rs10240229,0.715  
7,34.380,rs13221825,0.612  
7,34.434,rs4530935,0.620  
7,34.522,rs4721864,0.593  
7,34.554,rs12669202,0.594  
7,34.564,rs4721877,0.594  
7,34.605,rs2110328,0.574  
7,34.613,rs2390254,0.578  
7,34.659,rs6980121,0.591  
7,34.725,rs17142558,0.577  
7,34.788,rs1029600,0.560  
7,34.827,rs4721892,0.509  
7,34.888,rs3095208,0.498  
7,34.919,rs990528,0.503  
7,34.928,rs206187,0.506  
7,34.941,rs6974002,0.511  
7,34.989,rs10265149,0.558  
7,35.059,rs2074425,0.564  
7,35.091,rs2107128,0.565  
7,35.131,rs7796492,0.509  
7,35.138,rs6961781,0.513  
7,35.240,rs6461503,0.471  
7,35.294,rs999601,0.439  
7,35.340,rs17143131,0.445  
7,35.362,rs7805271,0.448  
7,35.362,rs1858944,0.448  
7,35.373,rs6461509,0.454  
7,35.410,rs2188594,0.477  
7,35.466,rs2529753,0.450  
7,35.660,rs17143466,0.494  
7,35.672,rs1155096,0.498  
7,35.691,rs2160093,0.496  
7,35.852,rs17676368,0.447  
7,35.865,rs3810892,0.445  
7,35.910,rs13438483,0.434  
7,35.952,rs6963278,0.391  
7,35.973,rs2215674,0.387  
7,36.122,rs4721981,0.355  
7,36.189,rs4721986,0.309  
7,36.244,rs10479786,0.286

7,36.294,rs4721998,0.256  
7,36.395,rs2529166,0.222  
7,36.399,rs1637308,0.221  
7,36.427,rs2057999,0.216  
7,36.534,rs10261327,0.195  
7,36.688,rs4722037,0.168  
7,36.713,rs6978629,0.166  
7,36.774,rs7779983,0.157  
7,36.835,rs6461593,0.130  
7,36.838,rs6975512,0.129  
7,36.851,rs2965387,0.123  
7,36.866,rs2033884,0.115  
7,36.907,rs6976078,0.104  
7,36.991,rs10485976,0.093  
7,37.076,rs2893049,0.083  
7,37.142,rs16873002,0.077  
7,37.146,rs2390592,0.077  
7,37.165,rs10485983,0.077  
7,37.194,rs11763291,0.075  
7,37.316,rs6461614,0.064  
7,37.335,rs1139225,0.061  
7,37.407,rs1406705,0.045  
7,37.481,rs2893061,0.038  
7,37.501,rs1174939,0.038  
7,37.549,rs7778988,0.039  
7,37.555,rs1175003,0.039  
7,37.609,rs1636296,0.042  
7,37.831,rs1636319,0.093  
7,37.979,rs2528907,0.081  
7,38.078,rs7784234,0.090  
7,38.130,rs7793513,0.093  
7,38.219,rs10267816,0.107  
7,38.296,rs1859800,0.116  
7,38.333,rs17146234,0.184  
7,38.336,rs7301,0.186  
7,38.337,rs3779069,0.209  
7,38.348,rs1859804,0.208  
7,38.422,rs17146377,0.226  
7,38.430,rs4719687,0.228  
7,38.514,rs17146521,0.227  
7,38.555,rs1636898,0.228  
7,38.642,rs2528804,0.250  
7,38.700,rs3094974,0.304  
7,38.746,rs4719696,0.266  
7,38.748,rs11761760,0.265  
7,38.849,rs2905346,0.288  
7,39.006,rs7805828,0.273  
7,39.023,rs10242595,0.269  
7,39.089,rs7810218,0.234  
7,39.175,rs6461674,0.228  
7,39.179,rs17147385,0.228  
7,39.302,rs6461679,0.221  
7,39.333,rs10488075,0.224  
7,39.389,rs17370204,0.232  
7,39.470,rs10950938,0.240  
7,39.480,rs11772019,0.215  
7,39.667,rs5029444,0.263  
7,39.864,rs6461743,0.279  
7,39.944,rs4719742,0.277  
7,39.961,rs10225926,0.275  
7,40.011,rs11975049,0.271

7,40.157,rs719158,0.253  
7,40.173,rs7806317,0.242  
7,40.275,rs272711,0.174  
7,40.414,rs13245518,0.150  
7,40.580,rs1012768,0.131  
7,40.615,rs2245657,0.129  
7,40.631,rs10253966,0.127  
7,40.637,rs17149382,0.127  
7,40.640,rs2722388,0.127  
7,40.643,rs2722396,0.127  
7,40.644,rs4722352,0.127  
7,40.657,rs9785009,0.122  
7,40.699,rs2521230,0.169  
7,40.714,rs4719773,0.153  
7,40.721,rs7778039,0.153  
7,40.788,rs11979343,0.156  
7,40.808,rs2240005,0.156  
7,40.848,rs1468185,0.157  
7,40.869,rs2106943,0.152  
7,40.933,rs8180767,0.123  
7,40.962,rs143,0.150  
7,40.985,rs6951637,0.166  
7,40.994,rs757139,0.173  
7,41.079,rs4722416,0.179  
7,41.090,rs10275560,0.169  
7,41.107,rs2526401,0.176  
7,41.111,rs39436,0.180  
7,41.114,rs12673033,0.180  
7,41.124,rs2717858,0.181  
7,41.183,rs11970814,0.185  
7,41.194,rs757202,0.186  
7,41.244,rs2107124,0.171  
7,41.261,rs2523090,0.163  
7,41.356,rs721316,0.136  
7,41.359,rs6966737,0.136  
7,41.472,rs2893205,0.129  
7,41.552,rs886800,0.119  
7,41.603,rs17151612,0.116  
7,41.892,rs17318255,0.097  
7,42.017,rs6956023,0.077  
7,42.029,rs11973020,0.087  
7,42.034,rs2952519,0.089  
7,42.041,rs2960818,0.085  
7,42.058,rs208553,0.078  
7,42.061,rs882101,0.078  
7,42.118,rs4719818,0.055  
7,42.240,rs10282436,0.030  
7,42.263,rs3823944,0.025  
7,42.268,rs7785415,0.024  
7,42.270,rs1451389,0.024  
7,42.308,rs6972699,0.022  
7,42.330,rs4719841,0.021  
7,42.338,rs745580,0.021  
7,42.425,rs6945001,0.028  
7,42.439,rs3814095,0.030  
7,42.465,rs4722585,0.033  
7,42.497,rs10236009,0.033  
7,42.575,rs12538280,0.035  
7,42.611,rs12534835,0.036  
7,42.619,rs1406754,0.033  
7,42.635,rs1468286,0.030

7,42.651,rs976346,0.039  
7,42.656,rs1229670,0.042  
7,42.704,rs916969,0.042  
7,42.710,rs12666750,0.041  
7,42.717,rs757393,0.041  
7,42.732,rs6461949,0.041  
7,42.733,rs6461951,0.041  
7,42.788,rs10486465,0.036  
7,42.791,rs10226436,0.038  
7,42.802,rs1005401,0.043  
7,42.806,rs10486467,0.044  
7,42.809,rs4722626,0.044  
7,42.861,rs17291131,0.048  
7,42.914,rs1023711,0.050  
7,43.012,rs213517,0.068  
7,43.023,rs13311400,0.070  
7,43.212,rs6949451,0.108  
7,43.228,rs11984297,0.110  
7,43.245,rs10486494,0.113  
7,43.313,rs11563582,0.131  
7,43.313,rs11564004,0.133  
7,43.314,rs6957104,0.133  
7,43.317,rs11980136,0.153  
7,43.343,rs6960719,0.154  
7,43.387,rs2074337,0.155  
7,43.416,rs757141,0.154  
7,43.462,rs17155332,0.147  
7,43.681,rs42101,0.111  
7,43.948,rs10266923,0.147  
7,43.950,rs17155987,0.147  
7,44.028,rs6948511,0.155  
7,44.099,rs6956423,0.162  
7,44.100,rs10486570,0.162  
7,44.108,rs38522,0.163  
7,44.108,rs38523,0.142  
7,44.108,rs6945134,0.186  
7,44.148,rs4722752,0.183  
7,44.169,rs17156253,0.183  
7,44.187,rs6462063,0.185  
7,44.229,rs11760530,0.202  
7,44.232,rs6977730,0.201  
7,44.268,rs17156416,0.189  
7,44.351,rs849336,0.161  
7,44.424,rs4722771,0.153  
7,44.454,rs177465,0.150  
7,44.493,rs849322,0.153  
7,44.517,rs1860758,0.142  
7,44.531,rs6973453,0.144  
7,44.605,rs10239810,0.101  
7,44.695,rs17156694,0.106  
7,44.708,rs177572,0.107  
7,44.726,rs1859020,0.111  
7,44.769,rs217503,0.113  
7,44.820,rs216730,0.118  
7,44.904,rs310338,0.080  
7,44.912,rs1637457,0.080  
7,44.934,rs160343,0.072  
7,44.946,rs41307,0.068  
7,44.971,rs41321,0.082  
7,44.981,rs42322,0.081  
7,45.026,rs982947,0.073

7,45.170,rs10486591,0.094  
7,45.332,rs2237361,0.102  
7,45.419,rs11975539,0.080  
7,45.491,rs12700916,0.072  
7,45.603,rs10216225,0.037  
7,45.652,rs1006514,0.027  
7,45.999,rs317710,0.022  
7,46.001,rs320101,0.022  
7,46.029,rs160862,0.024  
7,46.074,rs2192508,0.027  
7,46.102,rs323199,0.028  
7,46.207,rs245874,0.039  
7,46.208,rs17677737,0.039  
7,46.236,rs245895,0.042  
7,46.252,rs10256795,0.044  
7,46.365,rs6944596,0.053  
7,46.537,rs121724,0.067  
7,46.628,rs39061,0.070  
7,46.873,rs245974,0.060  
7,47.017,rs3812354,0.064  
7,47.069,rs2023908,0.066  
7,47.094,rs2214569,0.066  
7,47.247,rs1016726,0.071  
7,47.319,rs7801318,0.079  
7,47.463,rs2189439,0.087  
7,47.502,rs9648362,0.089  
7,47.596,rs849916,0.091  
7,47.713,rs10272160,0.134  
7,47.728,rs1362362,0.125  
7,47.737,rs7792461,0.140  
7,47.794,rs2024421,0.147  
7,47.880,rs10237982,0.166  
7,47.899,rs1420116,0.165  
7,47.906,rs7782330,0.165  
7,47.920,rs1641215,0.166  
7,48.029,rs6953643,0.191  
7,48.046,rs6462178,0.197  
7,48.074,rs174957,0.201  
7,48.102,rs2057902,0.199  
7,48.198,rs10488085,0.203  
7,48.477,rs7780166,0.245  
7,48.976,rs4722979,0.202  
7,49.044,rs13221972,0.197  
7,49.082,rs6947237,0.194  
7,49.121,rs6961625,0.194  
7,49.282,rs2906773,0.190  
7,49.360,rs10278906,0.184  
7,49.868,rs255108,0.226  
7,50.009,rs6966354,0.236  
7,50.044,rs7810199,0.240  
7,50.223,rs7780081,0.236  
7,50.310,rs1001733,0.199  
7,50.377,rs10244884,0.213  
7,50.423,rs4723034,0.208  
7,50.447,rs2267723,0.208  
7,50.612,rs1981701,0.232  
7,50.666,rs12668955,0.196  
7,50.666,rs2267727,0.196  
7,50.679,rs1541516,0.176  
7,50.707,rs2267737,0.159  
7,50.707,rs2267738,0.159

7,50.758,rs1012440,0.155  
7,50.763,rs9792050,0.154  
7,50.791,rs4291168,0.158  
7,50.915,rs177982,0.149  
7,51.109,rs6942902,0.134  
7,51.233,rs7801993,0.143  
7,51.273,rs17395568,0.145  
7,51.305,rs17160114,0.147  
7,51.371,rs218148,0.149  
7,51.407,rs218112,0.156  
7,51.444,rs218092,0.180  
7,51.715,rs6949643,0.181  
7,51.766,rs1003405,0.178  
7,51.873,rs10258296,0.172  
7,51.947,rs2159688,0.154  
7,52.009,rs1548828,0.115  
7,52.031,rs11980485,0.103  
7,52.036,rs2058411,0.103  
7,52.038,rs17160544,0.087  
7,52.094,rs1860788,0.075  
7,52.130,rs7792024,0.083  
7,52.156,rs6462320,0.089  
7,52.160,rs7783129,0.090  
7,52.229,rs6462324,0.076  
7,52.279,rs11761910,0.069  
7,52.526,rs996134,0.050  
7,52.553,rs10274609,0.049  
7,52.637,rs6978495,0.045  
7,52.644,rs917454,0.045  
7,52.688,rs1860220,0.032  
7,52.714,rs2240674,0.023  
7,52.754,rs6945244,0.023  
7,53.028,rs7789565,0.017  
7,53.054,rs1868773,0.016  
7,53.062,rs3999902,0.016  
7,53.084,rs6975016,0.016  
7,53.174,rs17161418,0.007  
7,53.305,rs17136990,0.001  
7,53.329,rs2392147,0.000  
7,53.387,rs12701264,-0.000  
7,53.388,rs17161568,-0.000  
7,53.497,rs9692508,-0.001  
7,53.574,rs7793096,-0.002  
7,53.694,rs12666901,-0.001  
7,53.708,rs4637716,-0.000  
7,53.731,rs10262995,-0.000  
7,53.734,rs2392244,-0.001  
7,53.744,rs2392246,-0.005  
7,53.810,rs6954592,-0.007  
7,53.811,rs17798136,-0.007  
7,53.864,rs10259679,-0.009  
7,53.878,rs12055962,-0.010  
7,53.881,rs4723329,-0.010  
7,53.894,rs11766089,-0.011  
7,53.937,rs7457120,-0.011  
7,53.953,rs315860,-0.011  
7,53.973,rs1427483,-0.011  
7,53.988,rs1427481,-0.011  
7,54.019,rs9986855,-0.010  
7,54.024,rs974937,-0.010  
7,54.050,rs7806522,-0.012

7,54.058,rs1420328,-0.010  
7,54.088,rs918038,0.000  
7,54.111,rs2058681,-0.000  
7,54.115,rs11486838,-0.000  
7,54.145,rs318628,-0.000  
7,54.147,rs318623,-0.000  
7,54.304,rs7792119,0.000  
7,54.305,rs7792581,0.000  
7,54.306,rs1468559,0.000  
7,54.316,rs7798886,0.000  
7,54.317,rs2041301,0.000  
7,54.389,rs10951423,0.001  
7,54.401,rs7800859,0.001  
7,54.410,rs1023556,0.001  
7,54.423,rs2531841,0.002  
7,54.488,rs1419868,0.000  
7,54.489,rs12111597,0.000  
7,54.489,rs17789834,0.000  
7,54.512,rs7804942,-0.000  
7,54.518,rs10252228,-0.000  
7,54.538,rs1649220,-0.000  
7,54.672,rs6976218,-0.008  
7,54.744,rs13239224,-0.006  
7,54.765,rs340383,-0.006  
7,54.880,rs13228642,-0.003  
7,54.888,rs342990,-0.002  
7,55.017,rs1035218,-0.000  
7,55.040,rs10486666,-0.000  
7,55.088,rs12111746,0.000  
7,55.096,rs6962286,0.000  
7,55.150,rs6979267,0.000  
7,55.229,rs4640967,0.000  
7,55.314,rs2392376,0.000  
7,55.583,rs12673861,0.000  
7,55.811,rs6980161,0.000  
7,55.960,rs10281852,0.000  
7,56.011,rs6462639,0.001  
7,56.071,rs2700936,0.002  
7,56.167,rs12537099,0.003  
7,56.236,rs2726070,0.003  
7,56.288,rs2726055,0.005  
7,56.425,rs2098368,0.008  
7,56.509,rs196579,0.007  
7,56.518,rs196584,0.007  
7,56.561,rs13224904,0.007  
7,56.653,rs197324,0.009  
7,56.775,rs3801314,0.015  
7,56.874,rs11763746,0.033  
7,56.897,rs7808209,0.033  
7,56.927,rs6942586,0.030  
7,56.960,rs2392445,0.041  
7,57.002,rs3801299,0.053  
7,57.109,rs2392452,0.030  
7,57.129,rs2727810,0.028  
7,57.165,rs2001599,0.030  
7,57.178,rs1962611,0.030  
7,57.220,rs4504543,0.031  
7,57.271,rs12672188,0.032  
7,57.379,rs3807609,0.031  
7,57.419,rs4720217,0.032  
7,57.541,rs6948589,0.037



7,57.583,rs759415,0.036  
7,57.690,rs17170765,0.032  
7,57.767,rs10240126,0.027  
7,57.793,rs1986858,0.026  
7,58.189,rs10265823,0.005  
7,58.253,rs6946785,0.003  
7,58.370,rs10951511,0.001  
7,58.490,rs2723996,0.001  
7,58.515,rs2724002,0.002  
7,58.521,rs3847015,0.004  
7,58.527,rs2723978,0.004  
7,58.550,rs2717947,0.002  
7,58.575,rs2724012,0.001  
7,58.581,rs1882079,0.001  
7,58.665,rs1882074,0.000  
7,58.671,rs6964474,0.000  
7,58.675,rs7788477,0.000  
7,58.725,rs10280643,0.001  
7,58.726,rs10267165,0.001  
7,58.747,rs17171046,0.000  
7,58.770,rs1882072,0.000  
7,58.773,rs10488653,0.000  
7,58.778,rs1731989,0.000  
7,58.779,rs4548075,0.000  
7,58.792,rs10215851,-0.000  
7,58.837,rs11763394,-0.001  
7,58.947,rs2392510,-0.001  
7,58.954,rs2257053,-0.001  
7,59.007,rs1530818,0.000  
7,59.015,rs10261983,-0.000  
7,59.038,rs2598124,-0.000  
7,59.040,rs2598119,-0.000  
7,59.057,rs2598107,0.002  
7,59.066,rs1047785,0.004  
7,59.085,rs9986874,0.006  
7,59.116,rs1524071,0.006  
7,59.154,rs940347,0.011  
7,59.336,rs6944227,0.016  
7,59.590,rs2159499,0.010  
7,59.607,rs4720273,0.010  
7,59.633,rs2248839,0.005  
7,59.634,rs2736969,0.005  
7,59.639,rs11769443,0.005  
7,59.641,rs17171331,0.005  
7,59.661,rs2080284,0.006  
7,59.683,rs4720279,0.009  
7,59.704,rs2196679,0.013  
7,59.712,rs2028209,0.016  
7,59.723,rs1561308,0.017  
7,59.728,rs4427071,0.018  
7,59.737,rs6948732,0.026  
7,59.743,rs6945114,0.032  
7,59.745,rs10278233,0.034  
7,59.764,rs6951440,0.049  
7,59.773,rs17171431,0.051  
7,59.776,rs2116666,0.051  
7,59.776,rs13242754,0.051  
7,59.827,rs3801135,0.031  
7,60.123,rs859524,0.046  
7,60.432,rs6959715,0.052  
7,60.581,rs7777684,0.060

7,60.598,rs3923506,0.060  
7,60.676,rs12701716,0.062  
7,60.788,rs10951603,0.066  
7,60.873,rs1558162,0.065  
7,60.885,rs6962246,0.066  
7,60.946,rs17770427,0.047  
7,61.022,rs7795004,0.040  
7,61.035,rs2008819,0.040  
7,61.114,rs10486804,0.041  
7,61.150,rs7458148,0.042  
7,61.207,rs4720341,0.042  
7,61.281,rs12701773,0.041  
7,61.550,rs6462962,0.050  
7,61.604,rs6964864,0.052  
7,61.702,rs11761602,0.047  
7,61.734,rs17171705,0.044  
7,61.788,rs10229414,0.038  
7,61.825,rs4320458,0.041  
7,61.903,rs740214,0.052  
7,61.941,rs6462986,0.056  
7,61.971,rs10282661,0.059  
7,62.119,rs2302025,0.038  
7,62.183,rs7801303,0.051  
7,62.193,rs6957465,0.051  
7,62.201,rs11767531,0.046  
7,62.202,rs10241209,0.043  
7,62.203,rs11767956,0.042  
7,62.208,rs29871,0.032  
7,62.273,rs2214880,0.009  
7,62.281,rs10229451,0.008  
7,62.364,rs2190346,0.014  
7,62.547,rs10242681,0.005  
7,62.585,rs431998,0.005  
7,62.614,rs11768528,0.005  
7,62.729,rs17774532,0.006  
7,62.760,rs273124,0.007  
7,62.809,rs900365,0.010  
7,62.917,rs2035425,0.016  
7,63.358,rs6961184,0.021  
7,63.390,rs4724065,0.021  
7,63.432,rs3886608,0.020  
7,63.435,rs29694,0.020  
7,63.439,rs7805291,0.015  
7,63.440,rs10234024,0.018  
7,63.440,rs6965030,0.021  
7,63.494,rs4724086,0.031  
7,63.640,rs846327,0.057  
7,63.700,rs9986932,0.056  
7,63.838,rs17172014,0.054  
7,63.847,rs846398,0.054  
7,63.888,rs12668912,0.084  
7,63.973,rs2286294,0.062  
7,64.062,rs3801220,0.068  
7,64.204,rs10277168,0.124  
7,64.310,rs13233071,0.087  
7,64.489,rs6954249,0.101  
7,64.508,rs12530988,0.103  
7,64.634,rs4050289,0.076  
7,64.642,rs4143614,0.067  
7,64.645,rs17172073,0.066  
7,64.674,rs1524594,0.065

7,64.717,rs17543692,0.050  
7,64.721,rs965739,0.051  
7,64.732,rs12113398,0.050  
7,64.738,rs2656510,0.050  
7,64.739,rs11984213,0.050  
7,64.762,rs17172123,0.059  
7,64.793,rs10486743,0.071  
7,64.804,rs596167,0.075  
7,64.821,rs17722435,0.080  
7,64.851,rs2190947,0.088  
7,64.854,rs6978743,0.092  
7,64.865,rs6957566,0.101  
7,64.905,rs1029482,0.106  
7,64.936,rs11771692,0.104  
7,64.945,rs2301871,0.103  
7,64.999,rs6968910,0.091  
7,65.070,rs10281361,0.076  
7,65.081,rs12702041,0.069  
7,65.123,rs6463191,0.042  
7,65.136,rs2304328,0.042  
7,65.149,rs10229477,0.041  
7,65.466,rs10250233,0.024  
7,65.513,rs2232108,0.020  
7,65.568,rs2595647,0.019  
7,65.692,rs7778745,0.016  
7,65.713,rs9784990,0.003  
7,65.797,rs2268576,0.001  
7,65.867,rs3757840,0.000  
7,65.944,rs3757836,0.000  
7,66.014,rs4724298,0.000  
7,66.083,rs9918696,0.000  
7,66.498,rs1434960,-0.000  
7,66.506,rs1055967,-0.000  
7,66.592,rs740094,-0.000  
7,66.620,rs799434,-0.002  
7,66.622,rs757694,-0.002  
7,66.671,rs2331175,-0.003  
7,66.734,rs2877301,-0.003  
7,67.046,rs10278144,-0.003  
7,67.129,rs1294935,-0.000  
7,67.152,rs11761143,-0.000  
7,67.158,rs1294910,-0.000  
7,67.160,rs1294906,-0.000  
7,67.174,rs1294889,-0.004  
7,67.174,rs12666793,-0.004  
7,67.187,rs1294875,-0.006  
7,67.270,rs2040863,-0.006  
7,67.335,rs799707,-0.008  
7,67.398,rs12702136,-0.010  
7,67.564,rs1917716,-0.013  
7,67.667,rs4724400,-0.022  
7,67.669,rs1534131,-0.022  
7,67.745,rs1525655,-0.013  
7,67.964,rs868362,-0.019  
7,67.974,rs2471226,-0.013  
7,67.974,rs10268339,-0.013  
7,68.087,rs2471267,-0.031  
7,68.091,rs10249706,-0.031  
7,68.394,rs4619,-0.036  
7,68.477,rs1496499,-0.030  
7,68.649,rs812570,-0.029

7,68.727,rs10499642,-0.040  
7,68.730,rs7794166,-0.041  
7,68.777,rs7778867,-0.033  
7,68.781,rs6976880,-0.032  
7,68.841,rs10280823,-0.040  
7,68.849,rs1966956,-0.041  
7,68.933,rs10234423,-0.054  
7,69.002,rs10243723,-0.065  
7,69.036,rs723149,-0.070  
7,69.084,rs17172727,-0.066  
7,69.085,rs983398,-0.066  
7,69.107,rs993183,-0.068  
7,69.129,rs12540816,-0.088  
7,69.147,rs856563,-0.110  
7,69.201,rs7789758,-0.124  
7,69.263,rs1525235,-0.129  
7,69.269,rs4415228,-0.129  
7,69.293,rs12702267,-0.131  
7,69.342,rs11767105,-0.137  
7,69.344,rs17172793,-0.137  
7,69.350,rs4724521,-0.141  
7,69.374,rs6959020,-0.147  
7,69.375,rs10487768,-0.147  
7,69.416,rs2286117,-0.155  
7,69.448,rs874321,-0.146  
7,69.458,rs1866361,-0.144  
7,69.553,rs2470998,-0.096  
7,69.567,rs12537130,-0.095  
7,69.589,rs2177795,-0.091  
7,69.612,rs834602,-0.087  
7,69.691,rs17172860,-0.084  
7,69.707,rs1799384,-0.083  
7,69.745,rs7793087,-0.068  
7,69.792,rs2964955,-0.049  
7,69.864,rs586005,-0.047  
7,69.954,rs675242,-0.067  
7,70.057,rs6974363,-0.094  
7,70.097,rs13235604,-0.086  
7,70.106,rs2347990,-0.105  
7,70.114,rs7792269,-0.106  
7,70.124,rs6947796,-0.099  
7,70.127,rs12702367,-0.096  
7,70.140,rs4720613,-0.108  
7,70.145,rs17545132,-0.113  
7,70.146,rs6953403,-0.114  
7,70.166,rs3800568,-0.138  
7,70.167,rs17659820,-0.139  
7,70.181,rs2053986,-0.133  
7,70.183,rs1554495,-0.133  
7,70.209,rs2686821,-0.174  
7,70.224,rs2307252,-0.183  
7,70.317,rs1526105,-0.218  
7,70.349,rs17712647,-0.203  
7,70.353,rs713061,-0.204  
7,70.364,rs17661843,-0.209  
7,70.376,rs1560792,-0.226  
7,70.383,rs2060330,-0.229  
7,70.383,rs6945363,-0.229  
7,70.399,rs4083233,-0.216  
7,70.471,rs3812250,-0.175  
7,70.478,rs4540359,-0.172

7,70.484,rs6975165,-0.183  
7,70.487,rs4363147,-0.190  
7,70.526,rs4557646,-0.148  
7,70.553,rs17132771,-0.124  
7,70.580,rs17132823,-0.127  
7,70.617,rs4244231,-0.130  
7,70.642,rs4917199,-0.129  
7,70.666,rs7792833,-0.131  
7,70.694,rs1155875,-0.190  
7,70.808,rs12056112,-0.206  
7,70.946,rs10250376,-0.197  
7,71.091,rs10263065,-0.180  
7,71.166,rs7778595,-0.173  
7,71.191,rs12718193,-0.169  
7,71.395,rs10251209,-0.141  
7,71.412,rs9642306,-0.137  
7,71.446,rs7796855,-0.132  
7,71.462,rs6971984,-0.130  
7,71.543,rs10263787,-0.122  
7,71.552,rs727051,-0.121  
7,71.567,rs1365086,-0.120  
7,71.656,rs10499687,-0.096  
7,71.715,rs12536329,-0.082  
7,71.772,rs6968993,-0.085  
7,72.150,rs11761913,-0.141  
7,72.205,rs13241213,-0.146  
7,72.227,rs10276619,-0.148  
7,72.352,rs7785321,-0.163  
7,72.376,rs7780012,-0.162  
7,72.532,rs1376523,-0.140  
7,72.585,rs10499694,-0.132  
7,72.687,rs2237444,-0.144  
7,72.904,rs1015573,-0.182  
7,72.917,rs4947921,-0.182  
7,72.917,rs17134051,-0.182  
7,72.922,rs4947475,-0.178  
7,72.942,rs12718959,-0.175  
7,73.143,rs6956095,-0.178  
7,73.160,rs2240090,-0.176  
7,73.179,rs7804820,-0.174  
7,73.191,rs10248051,-0.173  
7,73.218,rs17799219,-0.171  
7,73.249,rs10156067,-0.170  
7,73.331,rs10231416,-0.169  
7,73.644,rs6969097,-0.152  
7,73.789,rs12540310,-0.153  
7,73.824,rs17734557,-0.153  
7,73.998,rs758671,-0.110  
7,74.028,rs11765942,-0.037  
7,74.028,rs13226225,-0.037  
7,74.031,rs4947627,-0.036  
7,74.062,rs6973521,-0.037  
7,74.089,rs7786795,-0.038  
7,74.198,rs12718545,-0.042  
7,74.246,rs595846,-0.040  
7,74.272,rs1473654,-0.034  
7,74.305,rs759002,-0.027  
7,74.332,rs1525429,-0.027  
7,74.376,rs10254486,-0.027  
7,74.522,rs2113636,-0.031  
7,74.559,rs4947685,-0.032

7,74.586,rs1863081,-0.032  
7,74.600,rs10279635,-0.031  
7,74.633,rs2952763,-0.030  
7,74.691,rs4273801,-0.038  
7,74.882,rs6971252,-0.037  
7,74.920,rs1121768,-0.036  
7,75.000,rs10248355,-0.036  
7,75.087,rs2961030,-0.037  
7,75.137,rs10272941,-0.040  
7,75.145,rs1358603,-0.040  
7,75.149,rs6965436,-0.040  
7,75.224,rs971648,-0.055  
7,75.242,rs6946114,-0.062  
7,75.264,rs13246506,-0.070  
7,75.306,rs10248576,-0.087  
7,75.326,rs10239546,-0.094  
7,75.333,rs12718725,-0.096  
7,75.409,rs4947777,-0.118  
7,75.423,rs880048,-0.119  
7,75.428,rs1174864,-0.120  
7,75.464,rs6973717,-0.126  
7,75.473,rs6954000,-0.127  
7,75.530,rs17558136,-0.135  
7,75.546,rs10246618,-0.140  
7,75.601,rs11768111,-0.163  
7,75.662,rs9656687,-0.189  
7,75.693,rs2330583,-0.188  
7,75.718,rs13235506,-0.187  
7,75.768,rs12536631,-0.186  
7,75.803,rs12668378,-0.185  
7,75.822,rs17136044,-0.172  
7,75.882,rs11238298,-0.132  
7,75.894,rs1996991,-0.132  
7,76.017,rs507047,-0.133  
7,76.034,rs964823,-0.133  
7,76.044,rs12533009,-0.131  
7,76.047,rs1153922,-0.131  
7,76.052,rs1454524,-0.131  
7,76.066,rs10793421,-0.130  
7,76.067,rs582252,-0.150  
7,76.072,rs1569267,-0.146  
7,76.074,rs10499748,-0.146  
7,76.115,rs7805129,-0.141  
7,76.151,rs2699215,-0.134  
7,76.159,rs2699236,-0.133  
7,76.202,rs9691864,-0.132  
7,76.262,rs12055922,-0.131  
7,76.303,rs887811,-0.130  
7,76.395,rs10488137,-0.126  
7,76.479,rs7780270,-0.121  
7,76.498,rs4947490,-0.122  
7,76.535,rs2058502,-0.123  
7,76.566,rs13244925,-0.125  
7,76.591,rs6969570,-0.128  
7,76.597,rs887824,-0.127  
7,76.703,rs1554718,-0.115  
7,76.811,rs4947993,-0.116  
7,76.817,rs4947995,-0.098  
7,77.106,rs10282700,-0.085  
7,77.189,rs1568824,-0.090  
7,77.406,rs4245569,-0.074

7,77.408,rs7795911,-0.073  
7,77.431,rs4621761,-0.070  
7,77.526,rs6593287,-0.077  
7,77.609,rs13238899,-0.079  
7,77.622,rs816411,-0.079  
7,77.669,rs698626,-0.081  
7,77.683,rs10232581,-0.082  
7,77.779,rs7806502,-0.083  
7,77.868,rs10282225,-0.069  
7,78.058,rs13240443,-0.062  
7,78.104,rs13223276,-0.066  
7,78.120,rs6953819,-0.070  
7,78.219,rs7809798,-0.100  
7,78.281,rs9649680,-0.114  
7,78.501,rs13242011,-0.108  
7,78.578,rs12667898,-0.109  
7,78.600,rs1524616,-0.110  
7,78.681,rs7779067,-0.111  
7,78.719,rs17139478,-0.104  
7,78.783,rs7796427,-0.090  
7,78.802,rs13226579,-0.089  
7,78.807,rs2862876,-0.088  
7,78.810,rs10234472,-0.088  
7,78.827,rs1581570,-0.084  
7,78.902,rs2900856,-0.075  
7,78.917,rs4718223,-0.075  
7,78.920,rs10253900,-0.075  
7,79.006,rs10273658,-0.070  
7,79.196,rs17145225,-0.040  
7,79.222,rs4618582,-0.036  
7,79.270,rs7810927,-0.036  
7,79.339,rs10950078,-0.037  
7,79.411,rs716578,-0.039  
7,79.413,rs10261724,-0.039  
7,79.531,rs2530416,-0.038  
7,79.559,rs12698617,-0.044  
7,79.613,rs6948905,-0.047  
7,79.678,rs7805713,-0.036  
7,79.816,rs6971526,-0.028  
7,79.850,rs13240999,-0.025  
7,79.862,rs7791037,-0.024  
7,79.875,rs6958698,-0.025  
7,79.901,rs6971706,-0.025  
7,79.918,rs6969045,-0.026  
7,79.995,rs4718697,-0.041  
7,80.048,rs2642148,-0.047  
7,80.069,rs6968714,-0.048  
7,80.080,rs4718709,-0.042  
7,80.103,rs6979453,-0.029  
7,80.107,rs7777871,-0.028  
7,80.123,rs12672105,-0.023  
7,80.131,rs1990351,-0.023  
7,80.149,rs12535104,-0.013  
7,80.225,rs3113126,-0.007  
7,80.283,rs940597,-0.009  
7,80.337,rs10259019,-0.008  
7,80.392,rs12532549,-0.008  
7,80.425,rs2868540,-0.008  
7,80.438,rs7796950,-0.007  
7,80.471,rs903527,-0.006  
7,80.557,rs17670378,-0.004

7,80.740,rs10226192,-0.002  
7,80.832,rs1522499,-0.001  
7,80.957,rs4499981,-0.001  
7,81.031,rs10280848,-0.001  
7,81.134,rs4718801,-0.000  
7,81.400,rs12534964,0.000  
7,81.615,rs2527636,0.003  
7,81.731,rs2191749,0.010  
7,81.760,rs1476865,0.012  
7,81.770,rs7805438,0.015  
7,81.781,rs2024237,0.018  
7,81.806,rs3113288,0.028  
7,81.833,rs10464191,0.056  
7,81.843,rs1195227,0.059  
7,81.863,rs1718582,0.046  
7,81.867,rs10228728,0.047  
7,81.880,rs12056012,0.049  
7,81.896,rs10265054,0.048  
7,82.165,rs10237984,0.027  
7,82.614,rs12672930,0.005  
7,82.703,rs10486878,0.004  
7,82.755,rs4717530,0.003  
7,82.765,rs10486873,0.003  
7,82.833,rs734930,0.008  
7,82.855,rs12533226,0.009  
7,82.858,rs17141782,0.008  
7,82.877,rs38313,0.013  
7,82.880,rs723980,0.014  
7,82.896,rs7459368,0.017  
7,82.917,rs11979094,0.029  
7,82.936,rs6961823,0.038  
7,82.938,rs17141982,0.038  
7,82.941,rs10257489,0.039  
7,82.973,rs3923606,0.068  
7,83.021,rs2178044,0.074  
7,83.034,rs6947003,0.077  
7,83.064,rs4717554,0.080  
7,83.115,rs1527592,0.085  
7,83.158,rs1918425,0.089  
7,83.216,rs1568862,0.100  
7,83.250,rs2049475,0.101  
7,83.270,rs4717577,0.085  
7,83.299,rs4479997,0.085  
7,83.320,rs6460638,0.085  
7,83.340,rs4717580,0.085  
7,83.387,rs2867041,0.085  
7,83.408,rs10271414,0.089  
7,83.448,rs10237940,0.115  
7,83.468,rs7811880,0.108  
7,83.479,rs11772787,0.112  
7,83.481,rs4719095,0.112  
7,83.501,rs1202640,0.124  
7,83.533,rs4446620,0.129  
7,84.234,rs917111,0.179  
7,84.313,rs7798395,0.185  
7,84.454,rs4388345,0.182  
7,84.494,rs7808818,0.181  
7,84.513,rs6955186,0.164  
7,84.541,rs6973852,0.140  
7,84.573,rs10950267,0.119  
7,84.593,rs10237977,0.095



7,84.600,rs6460677,0.088  
7,84.624,rs4717626,0.073  
7,84.725,rs3846985,0.038  
7,84.857,rs4128154,0.025  
7,84.868,rs6961002,0.032  
7,84.873,rs993932,0.032  
7,84.883,rs2968509,0.032  
7,85.102,rs4717678,0.019  
7,85.145,rs11974621,0.018  
7,85.503,rs1880948,0.015  
7,85.728,rs2074754,0.013  
7,85.851,rs17341242,0.010  
7,85.961,rs6974424,0.007  
7,85.995,rs2884050,0.011  
7,86.066,rs4717104,0.009  
7,86.109,rs11764572,0.008  
7,86.246,rs13244770,0.005  
7,86.273,rs4717827,0.005  
7,86.298,rs12538362,0.005  
7,86.350,rs12530707,0.006  
7,86.438,rs6948963,0.010  
7,86.477,rs4717865,0.011  
7,86.499,rs2856728,0.011  
7,86.524,rs1091813,0.010  
7,86.589,rs178413,0.010  
7,86.644,rs223014,0.010  
7,86.800,rs17145361,0.011  
7,86.918,rs10949838,0.013  
7,86.960,rs37630,0.016  
7,86.990,rs2267824,0.017  
7,87.079,rs13238568,0.007  
7,87.743,rs1167795,0.009  
7,87.747,rs6964720,0.008  
7,87.766,rs237238,0.007  
7,87.772,rs807874,0.005  
7,87.780,rs17149227,0.005  
7,87.784,rs7794510,0.005  
7,87.809,rs17353131,0.009  
7,87.822,rs4728147,0.011  
7,87.833,rs6965172,0.009  
7,87.873,rs12538253,0.002  
7,87.938,rs2024049,0.002  
7,87.969,rs3898649,0.003  
7,87.989,rs239953,0.004  
7,88.005,rs4732513,0.005  
7,88.099,rs9649679,0.006  
7,88.215,rs758944,0.006  
7,88.247,rs10272095,0.009  
7,88.276,rs2286428,0.012  
7,88.279,rs3789833,0.012  
7,88.355,rs10952955,0.008  
7,88.505,rs12540927,0.003  
7,88.629,rs10278476,0.000  
7,88.740,rs10252204,-0.004  
7,88.849,rs1726576,-0.007  
7,88.856,rs2068031,-0.006  
7,88.908,rs2868784,-0.003  
7,89.157,rs7953,-0.006  
7,89.243,rs17158641,-0.003  
7,89.521,rs3807723,0.006  
7,89.551,rs3779300,0.007

7,89.588,rs2074646,0.008  
7,89.668,rs3807689,0.009  
7,89.817,rs3823778,0.011  
7,89.852,rs1829989,0.008  
7,89.892,rs17149959,0.007  
7,90.064,rs798319,0.003  
7,90.179,rs798337,0.003  
7,90.270,rs798285,0.001  
7,90.340,rs798309,0.002  
7,90.408,rs17150562,0.002  
7,90.463,rs7802036,0.002  
7,90.675,rs2191330,0.000  
7,90.732,rs12154832,0.002  
7,90.757,rs10266582,0.008  
7,90.761,rs10485887,0.010  
7,90.817,rs2160321,0.023  
7,90.867,rs7789215,0.042  
7,90.930,rs13227908,0.044  
7,90.930,rs322006,0.027  
7,90.955,rs321983,0.048  
7,90.975,rs7791589,0.047  
7,91.017,rs4370470,0.046  
7,91.082,rs37854,0.044  
7,91.102,rs1207887,0.038  
7,91.110,rs17151525,0.036  
7,91.179,rs508990,0.020  
7,91.182,rs1799025,0.020  
7,91.216,rs918285,0.024  
7,91.227,rs12705836,0.035  
7,91.375,rs17407075,0.099  
7,91.382,rs7809986,0.101  
7,91.807,rs4730838,0.145  
7,91.895,rs12111889,0.132  
7,91.922,rs7788571,0.128  
7,92.057,rs2365693,0.115  
7,92.108,rs2714703,0.110  
7,92.501,rs886364,0.085  
7,92.549,rs10274707,0.083  
7,92.618,rs2886609,0.079  
7,92.645,rs306699,0.078  
7,92.650,rs306705,0.078  
7,92.661,rs306694,0.078  
7,92.705,rs304733,0.078  
7,92.749,rs304774,0.079  
7,92.797,rs6467158,0.081  
7,92.836,rs12671431,0.078  
7,92.889,rs6959775,0.077  
7,92.890,rs7455906,0.077  
7,92.897,rs4112274,0.075  
7,92.964,rs1722504,0.050  
7,93.007,rs3211881,0.037  
7,93.085,rs1358340,0.023  
7,93.096,rs1058425,0.022  
7,93.114,rs13224811,0.022  
7,93.165,rs2040908,0.010  
7,93.177,rs4731861,0.008  
7,93.180,rs1016840,0.013  
7,93.217,rs765764,0.016  
7,93.314,rs1358503,0.026  
7,93.337,rs853048,0.022  
7,93.371,rs853107,0.028

7,93.470,rs4096939,0.050  
7,93.494,rs3847122,0.055  
7,93.544,rs7797400,0.066  
7,93.570,rs2190296,0.067  
7,93.573,rs327718,0.068  
7,93.674,rs7790316,0.067  
7,93.679,rs765619,0.067  
7,93.805,rs2967917,0.076  
7,93.844,rs10273273,0.079  
7,93.955,rs12532699,0.037  
7,94.058,rs2114736,0.035  
7,94.132,rs1029568,0.036  
7,94.148,rs17155381,0.036  
7,94.148,rs10257149,0.036  
7,94.217,rs5745696,0.036  
7,94.291,rs3735520,0.026  
7,94.374,rs17155547,0.025  
7,94.477,rs1922073,0.024  
7,94.614,rs12668403,0.019  
7,94.668,rs37093,0.018  
7,94.850,rs258651,0.023  
7,94.873,rs258684,0.023  
7,94.932,rs258710,0.025  
7,94.953,rs3801740,0.024  
7,94.972,rs38536,0.024  
7,95.024,rs13235513,0.024  
7,95.070,rs2367914,0.025  
7,95.202,rs740340,0.026  
7,95.262,rs42054,0.018  
7,95.343,rs10272528,0.020  
7,95.360,rs3801682,0.021  
7,95.411,rs17156280,0.017  
7,95.481,rs6965042,0.013  
7,95.664,rs6467906,0.019  
7,95.678,rs10486972,0.019  
7,95.725,rs1034784,0.017  
7,95.833,rs757134,0.014  
7,95.941,rs7806760,0.012  
7,95.964,rs9642144,0.012  
7,95.980,rs10250565,0.012  
7,96.092,rs12668093,0.013  
7,96.266,rs10808302,0.015  
7,96.312,rs9690648,0.016  
7,96.442,rs10487657,0.014  
7,96.444,rs6946469,0.015  
7,96.444,rs10954712,0.014  
7,96.444,rs7783211,0.009  
7,96.449,rs13224075,0.009  
7,96.449,rs17157388,0.009  
7,96.450,rs9656547,0.008  
7,96.788,rs2255872,0.001  
7,97.012,rs215311,0.001  
7,97.240,rs1181370,0.000  
7,97.403,rs6949364,0.010  
7,97.433,rs6467966,0.005  
7,97.448,rs6953094,0.003  
7,97.468,rs1526491,0.002  
7,97.614,rs6467970,0.006  
7,97.623,rs1526483,0.006  
7,97.680,rs10954737,0.006  
7,97.741,rs701308,0.009

7,97.802,rs797821,0.009  
7,97.993,rs2691694,0.010  
7,98.038,rs3823911,0.010  
7,98.132,rs17158686,0.008  
7,98.142,rs12666837,0.007  
7,98.142,rs10261069,0.007  
7,98.226,rs7802925,0.003  
7,98.280,rs594533,0.001  
7,98.298,rs1534573,-0.000  
7,98.300,rs4560742,-0.000  
7,98.388,rs2190208,-0.000  
7,98.462,rs11771648,-0.000  
7,98.497,rs7805482,-0.001  
7,98.507,rs2463468,-0.000  
7,98.547,rs1852697,-0.000  
7,98.663,rs13246206,0.002  
7,98.760,rs2726001,0.002  
7,98.784,rs10245061,0.001  
7,98.830,rs10243282,-0.000  
7,99.017,rs6965526,-0.000  
7,99.041,rs1405879,0.000  
7,99.106,rs724224,0.002  
7,99.160,rs2237565,0.001  
7,99.318,rs17766292,0.004  
7,99.330,rs10227182,0.005  
7,99.410,rs4148828,0.009  
7,99.415,rs31670,0.009  
7,99.444,rs6946119,0.009  
7,99.461,rs12720066,0.011  
7,99.470,rs2235023,0.012  
7,99.483,rs3789243,0.014  
7,99.628,rs10239100,0.016  
7,99.645,rs1688890,0.014  
7,99.694,rs10238083,0.019  
7,99.733,rs7792913,0.020  
7,99.772,rs8122,0.027  
7,99.786,rs12534694,0.027  
7,99.840,rs181123,0.028  
7,99.872,rs4728755,0.027  
7,99.879,rs6977770,0.025  
7,99.892,rs2519523,0.024  
7,99.951,rs2098278,0.024  
7,100.168,rs12113884,0.052  
7,100.180,rs1557917,0.054  
7,100.185,rs12672637,0.050  
7,100.214,rs10486887,0.021  
7,100.222,rs6959888,0.030  
7,100.340,rs12704428,0.034  
7,100.396,rs7781087,0.043  
7,100.425,rs6465186,0.052  
7,100.455,rs10279101,0.063  
7,100.507,rs1208853,0.063  
7,100.532,rs17168262,0.062  
7,100.551,rs38964,0.061  
7,100.606,rs6966330,0.058  
7,100.692,rs17617686,0.059  
7,100.779,rs3922360,0.055  
7,100.912,rs968908,0.036  
7,100.973,rs7805617,0.018  
7,100.993,rs7801279,0.017  
7,100.996,rs12535381,0.016

7,101.017,rs1024557,0.009  
7,101.018,rs6952332,0.009  
7,101.019,rs757951,0.009  
7,101.060,rs10226014,0.013  
7,101.074,rs12704526,0.014  
7,101.098,rs177667,0.017  
7,101.104,rs17867259,0.017  
7,101.106,rs11563855,0.017  
7,101.914,rs2286696,0.042  
7,102.089,rs705346,0.035  
7,102.090,rs1358101,0.035  
7,102.118,rs17163534,0.038  
7,102.148,rs705352,0.042  
7,102.172,rs696267,0.046  
7,102.214,rs10488002,0.036  
7,102.224,rs3735649,0.033  
7,102.339,rs1464000,0.037  
7,102.350,rs4236518,0.031  
7,102.360,rs4554397,0.026  
7,102.367,rs11970859,0.027  
7,102.425,rs6465306,0.033  
7,102.489,rs1346665,0.039  
7,102.549,rs1344708,0.030  
7,102.640,rs4329209,0.026  
7,102.896,rs10236483,0.027  
7,102.981,rs6977036,0.029  
7,102.982,rs4729040,0.020  
7,103.073,rs2079147,0.044  
7,103.381,rs13229771,0.034  
7,103.418,rs2188513,0.033  
7,103.472,rs723668,0.030  
7,103.474,rs4294124,0.030  
7,103.739,rs10488537,0.022  
7,103.797,rs2188404,0.021  
7,103.867,rs10233804,0.025  
7,103.885,rs11765782,0.028  
7,103.891,rs17165334,0.030  
7,103.900,rs2106431,0.033  
7,103.948,rs1801197,0.062  
7,103.978,rs2214213,0.071  
7,103.980,rs6465381,0.071  
7,104.017,rs2074120,0.077  
7,104.428,rs1557659,0.071  
7,104.504,rs8180847,0.072  
7,104.674,rs2519609,0.071  
7,104.785,rs2519630,0.088  
7,104.789,rs2724117,0.088  
7,104.966,rs17165845,0.096  
7,104.989,rs2724113,0.097  
7,105.004,rs17165876,0.096  
7,105.019,rs17303650,0.095  
7,105.055,rs17165948,0.092  
7,105.095,rs7794610,0.072  
7,105.115,rs10215958,0.082  
7,105.120,rs41532,0.090  
7,105.124,rs3286,0.098  
7,105.144,rs41542,0.105  
7,105.177,rs11973087,0.114  
7,105.293,rs7782469,0.099  
7,105.323,rs2157811,0.101  
7,105.325,rs1557658,0.088

7,105.357,rs7792596,0.077  
7,105.386,rs369982,0.082  
7,105.568,rs3750105,0.092  
7,105.628,rs6953258,0.090  
7,105.815,rs2030948,0.086  
7,105.856,rs6959219,0.085  
7,105.897,rs17305725,0.084  
7,105.902,rs17166665,0.084  
7,106.033,rs854547,0.087  
7,106.059,rs17166818,0.077  
7,106.080,rs1053275,0.071  
7,106.119,rs10240138,0.070  
7,106.161,rs7784619,0.048  
7,106.179,rs7807774,0.032  
7,106.185,rs10247649,0.028  
7,106.207,rs1485003,0.019  
7,106.221,rs854093,0.014  
7,106.281,rs7798936,0.010  
7,106.292,rs11767450,0.010  
7,106.300,rs1585737,0.011  
7,106.394,rs7789537,0.035  
7,106.436,rs9640640,0.051  
7,106.493,rs6465507,0.069  
7,106.527,rs6961784,0.067  
7,106.579,rs6465527,0.059  
7,106.716,rs7786855,0.042  
7,106.806,rs2948240,0.027  
7,106.851,rs1403185,0.030  
7,106.873,rs4727353,0.027  
7,106.908,rs12531148,0.033  
7,106.914,rs10486860,0.035  
7,106.932,rs717483,0.040  
7,106.939,rs2240293,0.041  
7,106.941,rs9641200,0.042  
7,106.968,rs1207731,0.052  
7,106.995,rs1207721,0.064  
7,107.020,rs1526084,0.065  
7,107.169,rs1918523,0.073  
7,107.277,rs1420172,0.071  
7,107.349,rs10435325,0.069  
7,107.370,rs1420181,0.068  
7,107.376,rs10236201,0.067  
7,107.449,rs1003620,0.043  
7,107.452,rs10485998,0.043  
7,107.460,rs10234240,0.043  
7,107.473,rs17168699,0.041  
7,107.518,rs10256461,0.036  
7,107.555,rs6415328,0.036  
7,107.674,rs7796445,0.065  
7,107.725,rs2072100,0.083  
7,107.779,rs460,0.089  
7,107.836,rs2665486,0.099  
7,107.974,rs10228951,0.125  
7,108.043,rs847580,0.127  
7,108.063,rs7777145,0.132  
7,108.405,rs9649213,0.194  
7,108.424,rs1688605,0.207  
7,108.484,rs705321,0.263  
7,108.524,rs817921,0.283  
7,108.546,rs817764,0.284  
7,108.553,rs817757,0.284

7,108.600,rs6465691,0.285  
7,108.743,rs6465710,0.299  
7,108.757,rs6972315,0.298  
7,108.772,rs9986780,0.296  
7,108.801,rs4727416,0.269  
7,108.859,rs1548622,0.264  
7,109.049,rs219824,0.229  
7,109.100,rs10231389,0.220  
7,109.188,rs4729521,0.206  
7,109.346,rs12705058,0.174  
7,109.503,rs2037595,0.134  
7,109.718,rs2687087,0.086  
7,109.770,rs2246709,0.074  
7,109.884,rs5015755,0.061  
7,109.902,rs4074838,0.060  
7,110.023,rs2734897,0.059  
7,110.100,rs4434553,0.048  
7,110.227,rs314300,0.078  
7,110.240,rs191137,0.093  
7,110.315,rs2075756,0.079  
7,110.378,rs4637750,0.081  
7,110.397,rs9691167,0.082  
7,110.488,rs11772963,0.096  
7,110.637,rs1048303,0.118  
7,110.695,rs10953329,0.113  
7,110.824,rs6943474,0.080  
7,110.846,rs10268365,0.077  
7,110.883,rs10254310,0.072  
7,110.923,rs7796259,0.065  
7,110.970,rs7778986,0.064  
7,110.986,rs10279545,0.064  
7,110.991,rs6949545,0.059  
7,111.022,rs4729731,0.034  
7,111.059,rs11489598,0.022  
7,111.096,rs11771949,0.012  
7,111.148,rs2529190,0.005  
7,111.162,rs2529243,0.004  
7,111.186,rs11977362,0.006  
7,111.249,rs11767486,0.004  
7,111.256,rs2529232,0.004  
7,111.413,rs11765661,0.005  
7,111.420,rs10264866,0.005  
7,111.434,rs11769397,0.005  
7,111.437,rs6465845,0.005  
7,111.446,rs11971570,0.009  
7,111.611,rs1734729,0.007  
7,111.631,rs803073,0.006  
7,111.710,rs6947435,0.001  
7,111.743,rs12669274,0.000  
7,111.755,rs3823657,0.000  
7,111.772,rs1131383,0.000  
7,112.066,rs12530741,-0.001  
7,112.250,rs17605251,-0.001  
7,112.402,rs11489600,-0.001  
7,112.586,rs362780,0.000  
7,112.587,rs362721,0.000  
7,112.598,rs362726,-0.009  
7,112.683,rs2073559,-0.006  
7,112.737,rs3819466,-0.008  
7,112.743,rs661492,-0.008  
7,112.837,rs2237643,-0.012

7,112.850,rs7811777,-0.011  
7,112.871,rs802788,-0.016  
7,112.888,rs17157475,-0.016  
7,112.944,rs6465953,-0.020  
7,112.984,rs10264307,-0.019  
7,113.047,rs194834,-0.011  
7,113.115,rs2106502,-0.008  
7,113.118,rs6973111,-0.007  
7,113.150,rs4383914,-0.006  
7,113.229,rs2385168,-0.008  
7,113.286,rs2188172,-0.007  
7,113.312,rs42209,-0.007  
7,113.321,rs992692,-0.008  
7,113.477,rs11977439,-0.021  
7,113.484,rs4559179,-0.022  
7,113.502,rs10279375,-0.024  
7,113.504,rs4517051,-0.024  
7,113.550,rs4283980,-0.017  
7,113.631,rs2041830,-0.017  
7,114.787,rs6945887,-0.007  
7,114.882,rs2258851,-0.002  
7,115.020,rs6466070,-0.001  
7,115.176,rs17150293,-0.000  
7,115.184,rs7787604,-0.000  
7,115.237,rs10242311,-0.001  
7,115.242,rs4730097,-0.001  
7,115.308,rs7799245,-0.001  
7,115.322,rs846926,-0.000  
7,115.418,rs614260,-0.001  
7,115.482,rs587741,-0.000  
7,115.500,rs11977943,-0.000  
7,115.510,rs557657,-0.000  
7,115.527,rs514122,-0.001  
7,115.542,rs17152107,-0.001  
7,115.580,rs12533538,-0.001  
7,115.616,rs17152163,-0.000  
7,115.651,rs17152217,-0.002  
7,115.673,rs1859814,-0.003  
7,115.699,rs212438,-0.000  
7,115.705,rs11765906,-0.000  
7,115.737,rs10248057,-0.000  
7,115.749,rs12533809,-0.000  
7,115.750,rs17152355,-0.002  
7,115.782,rs193805,-0.012  
7,115.790,rs2727758,-0.016  
7,115.799,rs193795,-0.018  
7,115.834,rs3887998,-0.029  
7,115.874,rs12533103,-0.041  
7,115.884,rs7798028,-0.044  
7,115.965,rs7785757,-0.051  
7,116.056,rs2192383,-0.055  
7,116.085,rs10487820,-0.055  
7,116.154,rs997980,-0.068  
7,116.175,rs2704958,-0.062  
7,116.228,rs179883,-0.060  
7,116.248,rs179898,-0.059  
7,116.265,rs2893638,-0.047  
7,116.279,rs9641363,-0.052  
7,116.374,rs6975426,-0.051  
7,116.382,rs17367541,-0.050  
7,116.404,rs17153276,-0.048



7,116.443,rs997803,-0.041  
7,116.512,rs342182,-0.026  
7,116.537,rs342231,-0.027  
7,116.557,rs10274553,-0.029  
7,116.574,rs342301,-0.036  
7,116.584,rs17153394,-0.025  
7,116.593,rs4517053,-0.010  
7,116.594,rs6957683,-0.009  
7,116.611,rs2132462,-0.013  
7,116.637,rs2028009,-0.024  
7,116.648,rs42154,-0.023  
7,116.670,rs849376,-0.019  
7,116.732,rs17153616,-0.013  
7,116.779,rs6961257,-0.010  
7,116.784,rs12530679,-0.010  
7,116.805,rs711441,-0.010  
7,116.897,rs9656135,-0.010  
7,117.517,rs6979121,-0.005  
7,117.588,rs6943051,-0.006  
7,118.079,rs2701688,-0.032  
7,118.094,rs3817613,-0.038  
7,118.120,rs1989837,-0.037  
7,118.141,rs982915,-0.035  
7,118.288,rs6973044,-0.024  
7,118.302,rs6466182,-0.024  
7,118.357,rs2108225,-0.020  
7,118.380,rs10241074,-0.012  
7,118.383,rs11762481,-0.011  
7,118.390,rs4727688,-0.013  
7,118.405,rs6967523,-0.007  
7,118.487,rs848403,0.000  
7,118.638,rs11978924,0.009  
7,118.745,rs10251102,0.010  
7,118.835,rs10277164,0.011  
7,118.944,rs1721447,0.009  
7,118.949,rs2396135,0.009  
7,118.964,rs7784378,0.011  
7,118.984,rs990943,0.009  
7,119.139,rs3107968,0.009  
7,119.384,rs2245022,0.008  
7,119.657,rs1525513,0.010  
7,119.699,rs13340481,0.011  
7,119.707,rs12538565,0.010  
7,119.821,rs1723580,0.008  
7,119.829,rs2396220,0.008  
7,119.832,rs1989875,0.008  
7,119.843,rs7796325,0.006  
7,119.851,rs7785319,0.004  
7,119.856,rs10272725,0.005  
7,119.910,rs407050,0.006  
7,119.914,rs2940381,0.011  
7,119.926,rs1354991,0.011  
7,119.962,rs1404915,0.008  
7,119.978,rs7807511,0.006  
7,120.020,rs1406054,0.002  
7,120.030,rs12670438,0.001  
7,120.144,rs214454,-0.002  
7,120.269,rs17158652,-0.008  
7,120.285,rs11978935,-0.009  
7,120.325,rs4730499,-0.011  
7,120.340,rs2074114,-0.013

7,120.364,rs6466389,-0.015  
7,120.375,rs6954980,-0.021  
7,120.377,rs17159014,-0.021  
7,120.397,rs6951506,-0.029  
7,120.398,rs29465,-0.030  
7,120.426,rs6959338,-0.042  
7,120.431,rs2522220,-0.043  
7,120.439,rs6974167,-0.037  
7,120.447,rs6466401,-0.039  
7,120.448,rs2560640,-0.028  
7,120.449,rs10260793,-0.019  
7,120.458,rs12705815,-0.009  
7,120.557,rs2708600,-0.001  
7,120.600,rs10155986,-0.001  
7,120.611,rs3807213,-0.001  
7,120.624,rs12531501,-0.001  
7,120.831,rs6973324,-0.003  
7,120.889,rs7797689,-0.005  
7,120.903,rs7801538,-0.005  
7,120.958,rs2256872,-0.004  
7,120.964,rs2246845,-0.004  
7,121.054,rs1722305,-0.006  
7,121.159,rs3922816,-0.008  
7,121.164,rs2949827,-0.008  
7,121.264,rs2396676,-0.004  
7,121.267,rs17136593,-0.003  
7,121.328,rs721996,-0.000  
7,121.386,rs10226417,-0.000  
7,121.410,rs4342528,0.000  
7,121.492,rs1868757,0.001  
7,121.515,rs4730626,0.001  
7,121.584,rs12112572,0.001  
7,121.639,rs1852470,0.001  
7,121.774,rs10230087,0.003  
7,121.957,rs4366023,0.012  
7,121.996,rs2188307,0.013  
7,122.050,rs4727809,0.015  
7,122.051,rs7800698,0.015  
7,122.057,rs6974433,0.015  
7,122.084,rs2709501,0.014  
7,122.136,rs371004,0.011  
7,122.234,rs2188538,0.015  
7,122.312,rs9641538,0.005  
7,122.359,rs10260121,0.000  
7,122.372,rs1918524,0.000  
7,122.387,rs6955743,0.001  
7,122.423,rs6955690,0.000  
7,122.531,rs10242959,-0.003  
7,122.639,rs6466573,-0.005  
7,123.091,rs6466579,-0.007  
7,123.206,rs2191502,-0.020  
7,123.274,rs714180,-0.051  
7,123.288,rs2237712,-0.055  
7,123.291,rs17138948,-0.056  
7,123.368,rs41758,-0.090  
7,123.446,rs10953831,-0.099  
7,123.450,rs7782376,-0.084  
7,123.539,rs7785492,-0.079  
7,123.571,rs3808222,-0.081  
7,123.588,rs10224415,-0.082  
7,123.595,rs10487358,-0.083

7,123.662,rs213950,-0.110  
7,123.675,rs13221882,-0.112  
7,123.717,rs929668,-0.114  
7,123.723,rs13224934,-0.114  
7,123.730,rs7807677,-0.114  
7,123.737,rs1966438,-0.110  
7,123.777,rs38825,-0.094  
7,123.784,rs6953304,-0.094  
7,123.866,rs4727871,-0.115  
7,123.920,rs10265433,-0.134  
7,124.020,rs2402455,-0.159  
7,124.039,rs12114016,-0.161  
7,124.107,rs7455060,-0.164  
7,124.114,rs10228248,-0.164  
7,124.198,rs13234712,-0.165  
7,124.235,rs7793527,-0.165  
7,124.318,rs7785571,-0.163  
7,124.355,rs11981389,-0.166  
7,124.361,rs728115,-0.167  
7,124.376,rs734317,-0.170  
7,124.495,rs41690,-0.202  
7,124.765,rs10262491,-0.219  
7,124.914,rs798903,-0.218  
7,125.015,rs6953489,-0.239  
7,125.066,rs3757552,-0.249  
7,125.184,rs2707507,-0.260  
7,125.437,rs2697189,-0.283  
7,125.475,rs7806789,-0.295  
7,125.490,rs4731018,-0.300  
7,125.495,rs2402574,-0.301  
7,125.509,rs1983496,-0.306  
7,125.526,rs7796124,-0.325  
7,125.593,rs10253361,-0.400  
7,125.609,rs7812162,-0.419  
7,125.636,rs6959329,-0.442  
7,125.672,rs10953942,-0.472  
7,125.684,rs10229295,-0.438  
7,125.987,rs537162,-0.482  
7,126.010,rs284391,-0.488  
7,126.059,rs1899689,-0.496  
7,126.063,rs920802,-0.497  
7,126.086,rs6944990,-0.494  
7,126.105,rs4731056,-0.517  
7,126.138,rs3757534,-0.523  
7,126.210,rs10238396,-0.532  
7,126.339,rs929569,-0.513  
7,126.446,rs10260099,-0.500  
7,126.500,rs6965704,-0.493  
7,126.555,rs1404838,-0.485  
7,126.677,rs10487971,-0.542  
7,126.679,rs7807163,-0.543  
7,126.691,rs10277013,-0.526  
7,126.747,rs2191800,-0.452  
7,126.770,rs1860722,-0.469  
7,126.803,rs2286831,-0.517  
7,126.820,rs4731117,-0.528  
7,127.029,rs7808465,-0.576  
7,127.148,rs12154449,-0.610  
7,127.234,rs13233306,-0.616  
7,127.248,rs12534665,-0.616  
7,127.359,rs17147142,-0.615

7,127.411,rs763434,-0.619  
7,127.418,rs4731184,-0.623  
7,127.420,rs1544521,-0.620  
7,127.483,rs10954042,-0.539  
7,127.596,rs1008290,-0.519  
7,127.848,rs13226395,-0.518  
7,127.932,rs2968865,-0.580  
7,127.999,rs17148062,-0.568  
7,128.119,rs12154752,-0.560  
7,128.240,rs10487420,-0.587  
7,128.250,rs996191,-0.591  
7,128.260,rs10236790,-0.589  
7,128.339,rs6974130,-0.582  
7,128.443,rs9641778,-0.523  
7,128.485,rs1419540,-0.514  
7,128.498,rs6965646,-0.468  
7,128.597,rs668717,-0.406  
7,128.630,rs1673366,-0.382  
7,128.708,rs1074728,-0.350  
7,128.776,rs974441,-0.364  
7,128.904,rs17863168,-0.387  
7,128.946,rs4728060,-0.393  
7,128.960,rs1419434,-0.393  
7,129.006,rs2402851,-0.394  
7,129.038,rs6975798,-0.393  
7,129.100,rs2299546,-0.392  
7,129.484,rs3808055,-0.382  
7,129.521,rs322812,-0.378  
7,129.587,rs1017607,-0.414  
7,129.606,rs6976221,-0.388  
7,129.614,rs6467165,-0.390  
7,129.667,rs2060715,-0.401  
7,129.691,rs7811892,-0.374  
7,129.723,rs2290225,-0.378  
7,129.733,rs723627,-0.374  
7,129.906,rs4371935,-0.310  
7,130.110,rs731770,-0.287  
7,130.120,rs7780294,-0.284  
7,130.125,rs339054,-0.282  
7,130.240,rs1472147,-0.223  
7,130.265,rs4731523,-0.227  
7,130.285,rs1495461,-0.239  
7,130.416,rs2167273,-0.243  
7,130.437,rs7783840,-0.244  
7,130.465,rs4731549,-0.247  
7,130.477,rs13227498,-0.248  
7,130.506,rs13243618,-0.259  
7,130.557,rs2718107,-0.269  
7,130.597,rs17348939,-0.292  
7,130.730,rs1665105,-0.270  
7,130.741,rs753336,-0.256  
7,130.766,rs634484,-0.262  
7,130.769,rs4731588,-0.263  
7,130.835,rs2402976,-0.307  
7,130.852,rs10244147,-0.326  
7,130.860,rs6965643,-0.330  
7,130.864,rs2693727,-0.331  
7,130.867,rs4731630,-0.302  
7,130.928,rs10215972,-0.300  
7,130.940,rs6943541,-0.302  
7,130.948,rs4731641,-0.302

7,130.995,rs6943859,-0.305  
7,131.206,rs4324873,-0.317  
7,131.429,rs17164720,-0.331  
7,131.491,rs17164729,-0.335  
7,131.508,rs1994468,-0.336  
7,131.602,rs6467289,-0.342  
7,131.738,rs2242337,-0.346  
7,131.804,rs901799,-0.347  
7,132.144,rs17330508,-0.395  
7,132.163,rs1990790,-0.397  
7,132.539,rs765205,-0.459  
7,133.147,rs6467310,-0.485  
7,133.508,rs290794,-0.472  
7,133.584,rs13234407,-0.468  
7,133.720,rs10954285,-0.479  
7,133.819,rs4269476,-0.433  
7,133.900,rs207210,-0.412  
7,134.013,rs9649546,-0.346  
7,134.024,rs157925,-0.339  
7,134.050,rs205761,-0.322  
7,134.073,rs205764,-0.320  
7,134.161,rs3823556,-0.312  
7,134.264,rs4141794,-0.315  
7,134.267,rs6973318,-0.314  
7,134.322,rs10488383,-0.277  
7,134.330,rs10237038,-0.271  
7,134.346,rs1588769,-0.263  
7,134.412,rs10265693,-0.233  
7,134.471,rs7803075,-0.222  
7,134.539,rs6467345,-0.225  
7,134.587,rs7812207,-0.231  
7,134.596,rs7791880,-0.235  
7,134.622,rs10253511,-0.251  
7,134.686,rs9690297,-0.311  
7,134.741,rs4731759,-0.347  
7,134.881,rs1863011,-0.423  
7,134.917,rs10240502,-0.434  
7,134.922,rs2129557,-0.435  
7,134.946,rs9640862,-0.438  
7,134.997,rs4731772,-0.442  
7,135.011,rs4731774,-0.443  
7,135.155,rs4728218,-0.429  
7,135.681,rs1043893,-0.489  
7,135.713,rs3212300,-0.482  
7,135.801,rs6953894,-0.468  
7,135.822,rs1465387,-0.468  
7,135.847,rs12667410,-0.466  
7,135.919,rs11760907,-0.424  
7,135.961,rs10155893,-0.382  
7,136.055,rs929731,-0.296  
7,136.181,rs11765576,-0.279  
7,136.188,rs10215358,-0.280  
7,136.212,rs4076265,-0.284  
7,136.330,rs2971759,-0.335  
7,136.370,rs17165866,-0.352  
7,136.439,rs2333894,-0.355  
7,136.560,rs4728236,-0.386  
7,136.659,rs2333896,-0.380  
7,136.815,rs1991190,-0.405  
7,136.881,rs1593306,-0.414  
7,136.938,rs10488345,-0.389

7,137.005,rs4311612,-0.362  
7,137.157,rs6944714,-0.418  
7,137.389,rs281913,-0.423  
7,137.541,rs11763166,-0.422  
7,137.776,rs11762143,-0.444  
7,137.910,rs1424596,-0.430  
7,137.968,rs2042513,-0.422  
7,138.142,rs741664,-0.456  
7,138.235,rs1347229,-0.464  
7,138.424,rs156927,-0.474  
7,138.503,rs156974,-0.432  
7,138.574,rs7789101,-0.425  
7,138.604,rs4728260,-0.420  
7,138.809,rs3823572,-0.344  
7,138.839,rs1222430,-0.317  
7,138.845,rs1421480,-0.311  
7,138.853,rs1364423,-0.300  
7,138.855,rs12667801,-0.297  
7,138.863,rs4732021,-0.289  
7,138.905,rs782535,-0.240  
7,138.924,rs1722883,-0.218  
7,138.929,rs4728329,-0.210  
7,138.932,rs9641977,-0.208  
7,138.963,rs7788959,-0.191  
7,138.967,rs4142278,-0.189  
7,138.968,rs964546,-0.188  
7,138.978,rs6962033,-0.179  
7,139.019,rs2347717,-0.155  
7,139.034,rs17133294,-0.156  
7,139.223,rs6973420,-0.167  
7,139.296,rs6976629,-0.168  
7,139.799,rs11771999,-0.151  
7,139.864,rs3800594,-0.144  
7,139.936,rs292593,-0.155  
7,140.006,rs292639,-0.143  
7,140.039,rs17168358,-0.122  
7,140.060,rs292706,-0.118  
7,140.122,rs889933,-0.096  
7,140.343,rs16874692,-0.074  
7,140.375,rs6467593,-0.070  
7,140.615,rs4430037,-0.052  
7,140.619,rs10228973,-0.052  
7,140.662,rs10279370,-0.058  
7,140.663,rs7357254,-0.058  
7,140.667,rs6977424,-0.058  
7,140.678,rs4732145,-0.070  
7,140.716,rs17168469,-0.059  
7,140.723,rs6962270,-0.057  
7,140.803,rs1982292,-0.057  
7,140.811,rs7789182,-0.057  
7,140.935,rs1994464,-0.058  
7,140.957,rs7793221,-0.056  
7,140.997,rs2129800,-0.057  
7,141.004,rs322213,-0.057  
7,141.051,rs4728378,-0.056  
7,141.065,rs9801253,-0.056  
7,141.087,rs6959619,-0.057  
7,141.103,rs2129801,-0.055  
7,141.121,rs10262220,-0.054  
7,141.216,rs1346209,-0.050  
7,141.285,rs13238853,-0.037

7,141.287,rs7811360,-0.036  
7,141.317,rs2217092,-0.036  
7,141.404,rs2882248,-0.023  
7,141.430,rs7796512,-0.025  
7,141.520,rs918985,-0.034  
7,141.628,rs1946332,-0.047  
7,141.827,rs10259281,-0.066  
7,141.907,rs10954546,-0.068  
7,142.011,rs9656474,-0.070  
7,142.027,rs6467694,-0.070  
7,142.041,rs3735028,-0.070  
7,142.055,rs1424569,-0.070  
7,142.125,rs7800170,-0.067  
7,142.255,rs324666,-0.064  
7,142.292,rs11772948,-0.064  
7,142.451,rs6467700,-0.066  
7,142.524,rs10435425,-0.065  
7,142.548,rs322246,-0.065  
7,142.570,rs6970530,-0.050  
7,142.662,rs13245911,-0.042  
7,142.867,rs320686,-0.054  
7,143.075,rs2278102,-0.053  
7,143.202,rs1731913,-0.054  
7,143.229,rs1918839,-0.053  
7,143.385,rs6971080,-0.050  
7,143.834,rs706567,-0.056  
7,143.897,rs706578,-0.055  
7,144.385,rs3800644,-0.035  
7,144.615,rs3778818,-0.026  
7,144.723,rs889869,-0.022  
7,144.949,rs6976928,-0.007  
7,145.284,rs274007,-0.000  
7,145.339,rs17276467,-0.000  
7,145.362,rs12707374,-0.001  
7,145.381,rs6467728,-0.001  
7,145.581,rs12112517,0.000  
7,145.774,rs17169524,-0.000  
7,145.783,rs2440799,-0.000  
7,145.853,rs2451233,-0.000  
7,145.885,rs6969282,-0.001  
7,145.889,rs6961222,-0.001  
7,145.907,rs2465075,-0.004  
7,145.908,rs2465076,-0.004  
7,145.980,rs6953434,-0.005  
7,146.033,rs6955437,-0.005  
7,146.145,rs4099093,-0.006  
7,146.251,rs17361616,-0.007  
7,146.330,rs11769851,-0.000  
7,146.461,rs7791577,0.000  
7,146.859,rs1673214,0.001  
7,146.870,rs1673218,0.001  
7,146.881,rs1673224,0.001  
7,146.892,rs753223,0.001  
7,146.909,rs4728438,0.000  
7,146.911,rs1659809,0.000  
7,146.972,rs11770967,-0.001  
7,147.009,rs17160459,-0.000  
7,147.039,rs6944016,-0.000  
7,147.072,rs6977910,0.000  
7,147.078,rs999229,-0.000  
7,147.099,rs3800569,-0.002

7,147.137,rs1562853,-0.011  
7,147.153,rs411467,-0.016  
7,147.174,rs3734936,-0.010  
7,147.195,rs10258719,-0.006  
7,147.236,rs6467802,-0.004  
7,147.292,rs10435433,-0.002  
7,147.401,rs10227043,0.000  
7,147.493,rs6467815,0.000  
7,147.508,rs6944822,0.000  
7,147.665,rs512927,0.001  
7,147.776,rs7803490,-0.000  
7,147.799,rs7779972,-0.000  
7,147.833,rs12535022,-0.000  
7,148.369,rs7779375,-0.002  
7,148.399,rs7385378,-0.002  
7,148.415,rs10435440,-0.001  
7,148.460,rs12672312,-0.004  
7,148.461,rs7799361,-0.004  
7,148.548,rs2030712,-0.004  
7,148.634,rs9719152,-0.002  
7,148.772,rs10261757,-0.000  
7,148.839,rs41708,-0.000  
7,148.881,rs4726434,-0.000  
7,148.926,rs2107901,-0.000  
7,148.960,rs11971428,-0.002  
7,148.974,rs3801148,-0.004  
7,149.013,rs12703513,-0.005  
7,149.018,rs10267006,-0.005  
7,149.175,rs2363101,-0.000  
7,149.196,rs2471281,0.000  
7,149.208,rs7799803,-0.000  
7,149.217,rs11971015,-0.000  
7,149.231,rs2471282,-0.000  
7,149.256,rs12538711,-0.000  
7,149.342,rs9640465,-0.000  
7,149.344,rs12539339,-0.001  
7,149.347,rs6954902,-0.001  
7,149.369,rs2948386,-0.000  
7,149.397,rs2272096,-0.000  
7,149.409,rs7776957,-0.000  
7,149.447,rs6945832,0.002  
7,149.454,rs6852,0.002  
7,149.463,rs6464833,0.002  
7,149.595,rs269267,0.009  
7,149.797,rs17623382,0.022  
7,149.887,rs9886312,0.024  
7,150.092,rs7789917,0.040  
7,150.107,rs13236601,0.039  
7,150.130,rs10256379,0.038  
7,150.175,rs6967493,0.041  
7,150.199,rs6975836,0.045  
7,150.207,rs917158,0.047  
7,150.295,rs10266594,0.051  
7,150.344,rs1181728,0.061  
7,150.369,rs1181739,0.069  
7,150.396,rs1181763,0.071  
7,150.452,rs4726454,0.064  
7,150.514,rs1110074,0.057  
7,150.817,rs12703402,0.052  
7,151.021,rs2234002,0.044  
7,151.361,rs4726484,0.066



7,151.365,rs1285938,0.082  
7,151.373,rs10255702,0.087  
7,151.377,rs4132774,0.106  
7,151.385,rs7810984,0.109  
7,151.409,rs6944985,0.119  
7,151.413,rs6954522,0.129  
7,151.428,rs4236467,0.178  
7,151.444,rs5012030,0.199  
7,151.470,rs17162994,0.170  
7,151.501,rs6958838,0.160  
7,151.539,rs11768398,0.145  
7,151.550,rs2855882,0.141  
7,151.551,rs949425,0.141  
7,151.621,rs2367486,0.111  
7,151.638,rs2063993,0.096  
7,151.733,rs12703516,0.095  
7,151.747,rs4726600,0.111  
7,151.764,rs10256011,0.114  
7,151.793,rs940867,0.113  
7,151.794,rs2242493,0.096  
7,151.801,rs7802536,0.096  
7,151.806,rs10233736,0.099  
7,151.815,rs10952549,0.087  
7,151.818,rs4726618,0.081  
7,151.821,rs11771145,0.081  
7,151.845,rs2949739,0.080  
7,151.848,rs2966709,0.080  
7,151.855,rs2949769,0.080  
7,151.972,rs12540107,0.095  
7,152.076,rs6947163,0.090  
7,152.102,rs1023533,0.089  
7,152.160,rs2107759,0.087  
7,152.266,rs2951346,0.078  
7,152.606,rs1024481,0.055  
7,152.669,rs4726711,0.053  
7,152.699,rs41238,0.036  
7,152.725,rs2191034,0.035  
7,152.744,rs2057868,0.034  
7,152.807,rs7804157,0.042  
7,152.840,rs17286117,0.038  
7,152.843,rs10231525,0.037  
7,152.857,rs17170295,0.029  
7,152.894,rs7807524,0.016  
7,152.902,rs17170428,0.016  
7,152.942,rs13438381,0.012  
7,153.030,rs1731117,0.016  
7,153.154,rs1881847,0.013  
7,153.252,rs4397312,0.014  
7,153.282,rs10258763,0.014  
7,153.287,rs1525459,0.014  
7,153.311,rs17394323,0.011  
7,153.332,rs7781772,0.007  
7,153.426,rs9640440,0.003  
7,153.520,rs7804383,0.001  
7,153.533,rs12531488,0.002  
7,153.562,rs10281160,0.004  
7,153.613,rs957452,0.004  
7,153.651,rs2023995,0.002  
7,153.662,rs7779216,0.002  
7,153.757,rs850377,0.002  
7,153.762,rs850360,0.005

7,153.799,rs6952800,0.007  
7,153.935,rs850533,0.007  
7,154.042,rs4601231,0.016  
7,154.101,rs4591940,0.019  
7,154.131,rs6965855,0.012  
7,154.140,rs6979491,0.010  
7,154.152,rs1404803,0.010  
7,154.236,rs13230938,0.010  
7,154.237,rs4612252,0.010  
7,154.298,rs1405109,0.012  
7,154.342,rs17503262,0.016  
7,154.468,rs700281,0.025  
7,154.858,rs766094,0.022  
7,154.935,rs10952650,0.022  
7,155.102,rs344465,0.012  
7,155.196,rs986062,0.008  
7,155.463,rs7780475,0.003  
7,155.534,rs10230479,0.002  
7,155.548,rs7341537,0.002  
7,155.553,rs12703846,0.000  
7,156.001,rs2159472,0.001  
7,156.024,rs10266239,0.002  
7,156.103,rs10261458,0.003  
7,156.199,rs4726818,0.003  
7,156.588,rs9769600,0.004  
7,156.645,rs12703890,0.004  
7,156.661,rs12531764,0.005  
7,157.276,rs7781317,0.022  
7,157.285,rs10487689,0.016  
7,157.287,rs1541415,0.031  
7,157.290,rs10226360,0.031  
7,157.345,rs851814,0.029  
7,157.582,rs11975946,0.036  
7,157.656,rs7783626,0.039  
7,157.849,rs700317,0.041  
7,157.893,rs10253551,0.051  
7,157.900,rs12056208,0.053  
7,158.075,rs851697,0.055  
7,158.195,rs12539579,0.067  
7,158.346,rs2538976,0.069  
7,158.440,rs2708264,0.070  
7,158.441,rs2539000,0.070  
7,158.526,rs1997530,0.085  
7,158.557,rs10229688,0.087  
7,158.629,rs2710079,0.089  
7,158.815,rs10271435,0.067  
7,158.958,rs6464854,0.052  
7,159.098,rs10264662,0.040  
7,159.139,rs2972112,0.033  
7,159.145,rs2972123,0.033  
7,159.176,rs17170876,0.030  
7,159.221,rs10245185,0.030  
7,159.245,rs4520084,0.020  
7,159.292,rs10263021,0.016  
7,159.381,rs1881722,0.013  
7,159.502,rs1110038,0.007  
7,159.824,rs2530311,-0.000  
7,159.888,rs17616515,-0.000  
7,159.956,rs6970519,-0.001  
7,160.025,rs6464907,-0.002  
7,160.184,rs10280054,-0.001

7,160.253,rs6978741,-0.004  
7,160.325,rs6947121,-0.005  
7,160.449,rs11773375,-0.002  
7,160.506,rs7812293,0.001  
7,160.754,rs243482,0.001  
7,160.839,rs10271133,0.001  
7,160.850,rs7778273,0.001  
7,161.081,rs7790642,0.004  
7,161.091,rs12531078,0.004  
7,161.113,rs922411,0.008  
7,161.130,rs716817,0.010  
7,161.156,rs6946486,0.011  
7,161.188,rs10265213,0.011  
7,161.278,rs3735315,0.009  
7,161.298,rs11761128,0.004  
7,161.303,rs736548,0.004  
7,161.326,rs1404862,0.004  
7,161.338,rs1636409,0.003  
7,161.350,rs6965442,0.003  
7,161.364,rs6973105,0.000  
7,161.371,rs3735317,0.000  
7,161.391,rs709067,-0.001  
7,161.393,rs6949128,0.000  
7,161.478,rs11982494,-0.002  
7,161.520,rs929344,-0.005  
7,161.522,rs855653,-0.003  
7,161.523,rs855654,-0.002  
7,161.525,rs855656,-0.003  
7,161.573,rs2074699,-0.004  
7,161.591,rs10807976,-0.004  
7,161.829,rs10244748,-0.003  
7,161.857,rs7393,-0.001  
7,161.867,rs4725896,-0.004  
7,161.878,rs7777181,-0.004  
7,161.883,rs13222973,-0.005  
7,161.895,rs6969414,-0.013  
7,161.911,rs7796182,-0.016  
7,161.916,rs4342497,-0.015  
7,162.266,rs6464094,-0.002  
7,162.421,rs17256042,-0.000  
7,162.423,rs3173833,0.000  
7,162.464,rs2888674,0.000  
7,162.501,rs17173637,0.000  
7,162.677,rs10216051,-0.000  
7,163.073,rs2373961,-0.001  
7,163.169,rs3918227,-0.000  
7,163.200,rs743507,-0.000  
7,163.236,rs2373929,-0.000  
7,163.305,rs6947821,-0.000  
7,163.323,rs17545756,-0.000  
7,163.487,rs2303933,0.000  
7,163.636,rs1978655,-0.000  
7,163.653,rs4725991,-0.000  
7,164.047,rs2487150,0.001  
7,164.076,rs2288649,0.001  
7,164.090,rs6952465,0.001  
7,164.095,rs310589,0.002  
7,164.100,rs310586,0.005  
7,164.327,rs122815,0.010  
7,164.381,rs3789823,0.012  
7,164.404,rs219236,0.012

7,164.574,rs219249,0.016  
7,164.734,rs17705456,0.019  
7,164.766,rs7807594,0.020  
7,164.809,rs2063995,0.021  
7,165.033,rs1558164,0.028  
7,165.095,rs1004340,0.039  
7,165.210,rs7792547,0.053  
7,165.250,rs10252902,0.059  
7,165.351,rs9640291,0.067  
7,165.507,rs17635967,0.063  
7,165.511,rs13224450,0.064  
7,165.612,rs7811407,0.071  
7,165.730,rs2538039,0.079  
7,165.900,rs2727541,0.068  
7,165.939,rs6952398,0.065  
7,165.947,rs10235949,0.064  
7,165.993,rs2536067,0.064  
7,166.029,rs7788160,0.067  
7,166.032,rs6960717,0.067  
7,166.038,rs6970522,0.067  
7,166.079,rs6965834,0.121  
7,166.084,rs7809503,0.130  
7,166.085,rs4418266,0.098  
7,166.087,rs9632641,0.130  
7,166.102,rs4425665,0.144  
7,166.115,rs7789699,0.151  
7,166.126,rs4726096,0.162  
7,166.140,rs10257529,0.147  
7,166.151,rs4595037,0.159  
7,166.152,rs10952318,0.161  
7,166.189,rs13238117,0.155  
7,166.194,rs1881623,0.157  
7,166.219,rs7795096,0.166  
7,166.240,rs7789674,0.173  
7,166.283,rs1881643,0.179  
7,166.284,rs10500202,0.178  
7,166.304,rs10952325,0.175  
7,166.333,rs13238381,0.186  
7,166.365,rs4726114,0.187  
7,166.397,rs2374313,0.175  
7,166.404,rs10259821,0.170  
7,166.430,rs1534664,0.145  
7,166.445,rs7799325,0.144  
7,166.467,rs6960270,0.142  
7,166.471,rs1919522,0.141  
7,166.494,rs10235029,0.138  
7,166.510,rs4726130,0.090  
7,166.796,rs10487892,0.080  
7,168.227,rs1107394,0.032  
7,168.460,rs6952647,0.034  
7,168.643,rs10155833,0.027  
7,168.883,rs6464250,0.016  
7,169.157,rs757052,0.010  
7,169.462,rs6970449,0.004  
7,169.633,rs10253827,0.000  
7,169.643,rs12539937,0.000  
7,169.910,rs7809363,-0.000  
7,170.181,rs7792217,-0.006  
7,170.237,rs6977071,-0.007  
7,170.302,rs6950216,-0.010  
7,170.363,rs940270,-0.006

7,170.407,rs2311367,-0.007  
7,170.429,rs12532611,-0.002  
7,170.461,rs10282370,-0.002  
7,170.533,rs6464295,-0.005  
7,170.545,rs12531982,-0.006  
7,170.553,rs520556,-0.006  
7,170.564,rs7800857,-0.006  
7,170.594,rs567778,-0.006  
7,170.613,rs6464297,-0.006  
7,170.664,rs4725479,-0.007  
7,170.711,rs17758559,-0.009  
7,170.727,rs1404591,-0.010  
7,171.011,rs4285401,-0.022  
7,171.100,rs6949036,-0.021  
7,171.180,rs1882828,-0.020  
7,171.212,rs6464323,-0.023  
7,171.308,rs1735086,-0.030  
7,171.325,rs1735093,-0.032  
7,171.346,rs401246,-0.032  
7,171.384,rs6946476,-0.032  
7,171.389,rs422283,-0.032  
7,171.424,rs2053640,-0.032  
7,171.463,rs4726278,-0.030  
7,171.491,rs960840,-0.029  
7,171.717,rs12703305,-0.028  
7,171.894,rs3111276,-0.026  
7,172.066,rs10247334,-0.034  
7,172.091,rs4726308,-0.033  
7,172.197,rs4595033,-0.039  
7,172.216,rs4726318,-0.039  
7,172.249,rs4410821,-0.035  
7,172.295,rs10228200,-0.040  
7,172.698,rs2538420,-0.040  
7,172.711,rs2622244,-0.040  
7,172.724,rs7783202,-0.028  
7,172.786,rs13246647,-0.020  
7,172.960,rs2190997,-0.028  
7,173.002,rs6973850,-0.029  
7,173.043,rs7803838,-0.029  
7,173.183,rs17134265,-0.009  
7,173.615,rs12532924,-0.000  
7,173.697,rs4380850,0.000  
7,173.864,rs10274025,0.000  
7,173.872,rs4078461,-0.000  
7,173.881,rs10952471,-0.000  
7,173.930,rs4278085,-0.000  
7,173.974,rs6464401,0.000  
7,174.019,rs6959816,-0.001  
7,174.784,rs17174375,-0.001  
7,175.110,rs7776495,-0.001  
7,175.621,rs4726417,-0.002  
7,175.712,rs7791484,-0.001  
7,175.716,rs13246835,-0.001  
7,175.745,rs4726422,-0.000  
7,175.771,rs13230019,-0.001  
7,175.821,rs10263063,0.002  
7,175.855,rs744684,0.000  
7,175.858,rs11771157,0.000  
7,175.860,rs12668503,0.001  
7,175.861,rs2087720,0.001  
7,175.956,rs1552734,0.005

7,176.052,rs6962496,0.015  
7,176.508,rs7795467,0.029  
7,176.539,rs6964189,0.029  
7,176.605,rs6597439,0.019  
7,176.639,rs6597446,0.009  
7,176.641,rs2046748,0.015  
7,176.642,rs6980443,0.015  
7,176.829,rs3807222,0.025  
7,176.865,rs7792530,0.025  
7,176.867,rs7807148,0.025  
7,176.978,rs10273747,0.043  
7,176.985,rs12666280,0.043  
7,176.992,rs3823523,0.034  
7,177.136,rs961232,0.079  
7,177.140,rs12532804,0.051  
7,177.145,rs6597423,0.052  
7,177.231,rs11243316,0.058  
7,177.399,rs4265142,0.087  
7,177.445,rs11243322,0.091  
7,177.571,rs3807294,0.099  
7,177.650,rs4294147,0.075  
7,177.678,rs882466,0.067  
7,177.860,rs2272174,0.054  
7,178.243,rs2919435,0.044  
7,178.323,rs1657273,0.044  
7,178.411,rs1657246,0.056  
7,178.448,rs6597458,0.074  
7,178.485,rs1881690,0.074  
7,178.584,rs1657263,0.074  
7,178.624,rs1657298,0.078  
7,178.657,rs1657302,0.083  
7,178.751,rs4960580,0.099  
7,178.833,rs4434576,0.096  
7,178.886,rs4960710,0.114  
7,178.964,rs4506162,0.122  
7,178.968,rs3923644,0.122  
7,179.064,rs9690040,0.133  
7,179.115,rs9769506,0.132  
7,179.388,rs4716442,0.097  
7,179.413,rs2058950,0.090  
7,179.420,rs11760227,0.089  
7,179.510,rs4621673,0.075  
7,179.521,rs10264222,0.072  
7,179.554,rs12531084,0.064  
7,179.579,rs11768588,0.059  
7,179.587,rs6948976,0.059  
7,179.709,rs10251163,0.061  
7,179.753,rs12538214,0.055  
7,179.784,rs1861960,0.036  
7,179.820,rs4716653,0.020  
7,179.970,rs6975765,0.032  
7,180.049,rs10277542,0.029  
7,180.107,rs6459794,0.033  
7,180.117,rs6953751,0.035  
7,180.183,rs9654697,0.059  
7,180.257,rs6946081,0.061  
7,180.811,rs2007922,0.042  
7,180.992,rs1233563,0.024  
7,181.115,rs10234949,0.011  
7,181.120,rs1731847,0.010  
7,181.128,rs11768525,0.009

7,181.176,rs898695,0.002  
7,181.177,rs754469,0.002  
7,181.196,rs7777688,0.002  
7,181.199,rs1461208,0.002  
7,181.201,rs7786445,0.002  
7,181.214,rs12698335,0.002  
7,181.257,rs1824552,0.006  
7,181.285,rs4716923,0.003  
7,181.416,rs10225087,0.002  
7,181.480,rs7807731,0.002  
7,181.526,rs1458806,0.003  
7,181.595,rs7792543,0.004  
7,181.674,rs2305944,0.007  
7,181.716,rs4716580,0.009  
7,181.735,rs6963951,0.008  
7,181.769,rs1551634,0.008  
7,181.844,rs7782106,0.011  
7,181.881,rs10251705,0.010  
7,182.112,rs6969259,0.004  
7,182.170,rs7793353,0.003  
7,182.259,rs7798069,0.002  
7,182.267,rs1181908,0.003  
7,182.436,rs1493290,0.006  
7,182.510,rs1882458,0.006  
7,182.587,rs9654739,0.011  
7,182.647,rs6460015,0.009  
7,182.731,rs4435995,0.007  
7,182.876,rs4717043,0.005  
7,182.932,rs10258969,0.004  
7,182.976,rs3912927,0.002  
7,183.225,rs1534002,-0.000  
7,183.330,rs6957217,-0.000  
7,183.354,rs6459682,-0.000  
7,183.387,rs12669392,-0.001  
7,183.603,rs1534339,-0.002  
7,183.636,rs849084,-0.006  
7,183.692,rs4716636,-0.006  
7,183.720,rs849063,-0.005  
7,183.827,rs7801996,-0.005  
7,183.853,rs849072,-0.006  
7,184.016,rs7812229,-0.005  
7,184.231,rs2072468,-0.004  
7,184.445,rs7788421,-0.004  
7,185.071,rs887614,-0.006  
7,185.118,rs777527,-0.006  
7,185.306,rs4716447,-0.004  
7,185.352,rs10259516,-0.004  
7,185.491,rs7799010,-0.003  
7,186.268,rs12533310,-0.007  
7,186.669,rs10440911,-0.002  
7,186.800,rs7804019,-0.002  
7,186.875,rs4716739,-0.004  
7,186.968,rs9768449,-0.004  
7,187.081,rs4716752,-0.003  
7,187.161,rs221250,-0.003  
7,187.368,rs10274279,-0.006  
7,187.615,rs1263566,-0.014  
7,187.636,rs1079060,-0.023  
7,187.665,rs1263549,-0.025  
7,187.886,rs867923,-0.041  
7,187.888,rs11976357,-0.041

7,187.890,rs1242775,-0.041  
7,187.913,rs1638742,-0.040  
7,187.993,rs1242778,-0.039  
7,188.154,rs870020,-0.028  
7,188.260,rs7777198,-0.022  
7,188.285,rs1529835,-0.024  
7,188.346,rs7788108,-0.029  
7,188.453,rs4716801,-0.041  
7,188.548,rs4716807,-0.042  
7,188.628,rs10249811,-0.038  
7,188.742,rs4716858,-0.034  
7,188.793,rs920027,-0.019  
7,188.917,rs4716881,-0.024  
7,189.016,rs10256092,-0.025  
7,189.097,rs6961856,-0.021  
7,189.178,rs3752374,-0.018  
7,189.341,rs6459842,-0.015  
7,189.650,rs6970487,-0.013  
7,189.769,rs6976603,-0.009  
7,189.795,rs1104921,-0.008  
7,189.851,rs11973244,-0.009  
7,189.947,rs7790889,-0.012  
7,189.952,rs4909062,-0.012  
7,190.103,rs12698219,-0.014  
7,190.171,rs7809114,-0.016  
7,190.177,rs10245268,-0.016  
7,190.409,rs10247026,-0.011  
7,190.555,rs1670340,-0.011  
7,191.342,rs13242357,-0.006  
7,192.477,rs2040897,-0.007  
7,192.627,rs2730265,-0.007  
7,193.616,rs1124425,-0.001  
8,0.005,rs4735895,0.135  
8,0.043,rs876356,0.135  
8,0.166,rs10094564,0.139  
8,0.180,rs11784674,0.139  
8,0.242,rs13274614,0.131  
8,0.319,rs11137104,0.113  
8,0.467,rs3860880,0.101  
8,0.605,rs4735959,0.102  
8,0.841,rs12678439,0.114  
8,0.929,rs4735980,0.122  
8,0.975,rs17668341,0.129  
8,1.041,rs7842241,0.139  
8,1.102,rs12716579,0.158  
8,1.219,rs7826946,0.187  
8,1.222,rs17065805,0.184  
8,1.235,rs10094928,0.166  
8,1.252,rs1463249,0.171  
8,1.283,rs4549802,0.178  
8,1.314,rs4976875,0.182  
8,1.411,rs7814902,0.201  
8,1.478,rs11775819,0.234  
8,1.479,rs10094861,0.234  
8,1.488,rs6558446,0.235  
8,1.536,rs10093402,0.241  
8,1.554,rs7823212,0.237  
8,1.569,rs12541553,0.235  
8,1.595,rs10283337,0.246  
8,1.638,rs757888,0.254  
8,1.699,rs6997056,0.268



8,2.035,rs2906590,0.288  
8,2.271,rs2235114,0.349  
8,2.283,rs4875888,0.348  
8,2.326,rs7005715,0.317  
8,2.329,rs2977177,0.316  
8,2.392,rs2977187,0.289  
8,2.420,rs7461883,0.282  
8,2.561,rs6558545,0.267  
8,2.581,rs6980781,0.255  
8,2.625,rs4875952,0.228  
8,2.675,rs7007884,0.211  
8,2.684,rs13277792,0.218  
8,2.696,rs10503168,0.232  
8,2.709,rs4875946,0.247  
8,2.766,rs7015000,0.283  
8,2.766,rs3758014,0.313  
8,2.773,rs13280012,0.274  
8,2.784,rs2294035,0.256  
8,2.803,rs7004405,0.259  
8,2.818,rs7386814,0.274  
8,2.836,rs4242548,0.273  
8,2.904,rs17757154,0.281  
8,2.919,rs6558568,0.277  
8,2.924,rs4242546,0.277  
8,2.996,rs1043223,0.258  
8,3.010,rs768753,0.252  
8,3.033,rs6558578,0.281  
8,3.124,rs7819286,0.315  
8,3.131,rs13258621,0.311  
8,3.188,rs2235121,0.320  
8,3.211,rs2294069,0.357  
8,3.211,rs2294071,0.358  
8,3.249,rs6990007,0.393  
8,3.341,rs9314455,0.466  
8,3.470,rs10110313,0.529  
8,3.773,rs4876153,0.578  
8,3.786,rs7812885,0.573  
8,3.794,rs7843995,0.572  
8,3.889,rs12549051,0.521  
8,3.908,rs2100623,0.517  
8,3.977,rs6420206,0.514  
8,3.999,rs9314461,0.477  
8,4.004,rs7828186,0.442  
8,4.160,rs7843177,0.542  
8,4.231,rs4876024,0.614  
8,4.250,rs4075492,0.621  
8,4.314,rs13439672,0.614  
8,4.315,rs17515,0.613  
8,4.322,rs10087989,0.609  
8,4.374,rs10106748,0.585  
8,4.387,rs6982596,0.576  
8,4.405,rs4457357,0.563  
8,4.424,rs7836236,0.540  
8,4.749,rs341704,0.440  
8,4.810,rs6981972,0.471  
8,4.828,rs2627283,0.450  
8,4.846,rs12682123,0.396  
8,4.862,rs897275,0.370  
8,5.134,rs10092374,0.283  
8,5.143,rs7013027,0.284  
8,5.181,rs1108095,0.274

8,5.212,rs7826548,0.242  
8,5.237,rs3802292,0.221  
8,5.253,rs7002853,0.279  
8,5.318,rs2406358,0.285  
8,5.359,rs1460404,0.286  
8,5.378,rs11136586,0.281  
8,5.389,rs259856,0.263  
8,5.424,rs13261550,0.312  
8,5.448,rs1442398,0.338  
8,5.503,rs7845677,0.407  
8,5.509,rs4546683,0.406  
8,5.517,rs7002936,0.406  
8,5.537,rs10104274,0.412  
8,5.623,rs9650506,0.411  
8,5.675,rs1503277,0.399  
8,5.747,rs1444613,0.373  
8,5.821,rs7015057,0.393  
8,5.883,rs9969557,0.404  
8,5.971,rs11778675,0.467  
8,6.102,rs10087333,0.508  
8,6.115,rs895701,0.505  
8,6.116,rs1532583,0.505  
8,6.119,rs6993945,0.505  
8,6.157,rs6983016,0.504  
8,6.176,rs7840695,0.513  
8,6.231,rs4503118,0.577  
8,6.239,rs13266649,0.583  
8,6.266,rs10086848,0.572  
8,6.397,rs2469358,0.567  
8,6.419,rs2469350,0.566  
8,6.490,rs2469312,0.569  
8,6.499,rs2449215,0.571  
8,6.522,rs4523281,0.567  
8,6.540,rs1482207,0.564  
8,6.542,rs17066733,0.565  
8,6.555,rs1586030,0.562  
8,6.559,rs13439830,0.566  
8,6.585,rs1482195,0.551  
8,6.640,rs4307367,0.472  
8,6.654,rs2720887,0.445  
8,6.718,rs7824328,0.377  
8,6.743,rs9314506,0.362  
8,6.791,rs2930362,0.353  
8,6.994,rs10216531,0.365  
8,7.008,rs2948653,0.362  
8,7.040,rs2954610,0.356  
8,7.045,rs2204223,0.358  
8,7.085,rs17068071,0.426  
8,7.108,rs1464618,0.433  
8,7.125,rs2740868,0.432  
8,7.129,rs756095,0.432  
8,7.215,rs17068332,0.393  
8,7.292,rs2059581,0.384  
8,7.325,rs2740962,0.432  
8,7.367,rs2980796,0.450  
8,7.384,rs7812972,0.458  
8,7.415,rs2554566,0.496  
8,7.459,rs2554555,0.500  
8,7.507,rs2980785,0.480  
8,7.614,rs4875274,0.470  
8,7.664,rs7828949,0.496

8,7.919,rs3849836,0.485  
8,7.989,rs4875308,0.500  
8,8.014,rs6991758,0.465  
8,8.022,rs3889326,0.457  
8,8.042,rs3849843,0.439  
8,8.079,rs2680590,0.444  
8,8.086,rs11992223,0.445  
8,8.154,rs6984808,0.434  
8,8.157,rs13259289,0.468  
8,8.209,rs17069790,0.469  
8,8.242,rs2407940,0.468  
8,8.313,rs17413343,0.486  
8,8.347,rs10106165,0.499  
8,8.377,rs4875329,0.517  
8,8.437,rs6996351,0.556  
8,8.481,rs17069985,0.587  
8,8.554,rs1583651,0.569  
8,8.638,rs11988906,0.556  
8,8.687,rs7831167,0.584  
8,8.688,rs6558876,0.584  
8,8.722,rs7816189,0.723  
8,8.723,rs11136742,0.725  
8,8.762,rs4478597,0.699  
8,8.837,rs13278525,0.707  
8,8.863,rs1217675,0.693  
8,8.900,rs4875349,0.672  
8,8.926,rs4875350,0.681  
8,9.040,rs4609213,0.647  
8,9.046,rs1112779,0.647  
8,9.087,rs11136747,0.629  
8,9.140,rs7010832,0.604  
8,9.223,rs2725009,0.575  
8,9.264,rs17416403,0.584  
8,9.312,rs2617086,0.593  
8,9.330,rs2724952,0.604  
8,9.343,rs1382249,0.603  
8,9.356,rs6990838,0.609  
8,9.406,rs2616972,0.628  
8,9.417,rs10100024,0.594  
8,9.417,rs2616982,0.594  
8,9.419,rs2725020,0.559  
8,9.419,rs10113503,0.552  
8,9.421,rs17070864,0.522  
8,9.501,rs6997228,0.596  
8,9.555,rs2617019,0.646  
8,9.711,rs17346747,0.642  
8,9.718,rs293872,0.643  
8,9.758,rs7826378,0.616  
8,9.801,rs2407592,0.607  
8,9.870,rs7835351,0.599  
8,9.950,rs17432531,0.589  
8,9.956,rs12679612,0.589  
8,10.136,rs11136785,0.584  
8,10.235,rs7816996,0.480  
8,10.251,rs893465,0.469  
8,10.448,rs7004026,0.390  
8,10.586,rs17434263,0.429  
8,10.615,rs6997954,0.438  
8,10.732,rs7843140,0.475  
8,10.735,rs7817362,0.476  
8,10.780,rs17072336,0.452

8,10.788,rs7818650,0.453  
8,10.925,rs11779265,0.462  
8,11.036,rs4130201,0.484  
8,11.258,rs4460395,0.509  
8,11.312,rs6558990,0.513  
8,11.339,rs7845021,0.517  
8,11.343,rs1362689,0.517  
8,11.386,rs9314561,0.517  
8,11.629,rs7003556,0.506  
8,11.755,rs1526364,0.502  
8,12.077,rs10103979,0.524  
8,12.171,rs767239,0.494  
8,12.183,rs4875580,0.488  
8,12.211,rs6998695,0.471  
8,12.252,rs1468385,0.414  
8,12.273,rs727781,0.409  
8,12.285,rs1859595,0.405  
8,12.418,rs2527095,0.352  
8,12.420,rs2733084,0.351  
8,12.428,rs2732949,0.364  
8,12.438,rs11777608,0.376  
8,12.474,rs4875607,0.350  
8,12.489,rs2725661,0.359  
8,12.562,rs2732986,0.399  
8,12.579,rs6992802,0.401  
8,12.597,rs6988955,0.406  
8,12.665,rs10096897,0.395  
8,12.765,rs10112106,0.377  
8,12.934,rs7812557,0.341  
8,12.941,rs9987113,0.338  
8,12.966,rs12682166,0.333  
8,13.012,rs2408100,0.321  
8,13.160,rs1512820,0.302  
8,13.236,rs2703251,0.306  
8,13.273,rs2703263,0.307  
8,13.276,rs2816520,0.307  
8,13.309,rs10503343,0.305  
8,13.593,rs4875678,0.280  
8,13.651,rs6984460,0.280  
8,13.664,rs11783989,0.280  
8,13.725,rs17075950,0.294  
8,13.783,rs10503354,0.278  
8,13.785,rs10503355,0.278  
8,13.829,rs11985779,0.276  
8,13.869,rs17076074,0.286  
8,13.911,rs6983976,0.301  
8,13.995,rs890032,0.347  
8,14.023,rs13260564,0.339  
8,14.034,rs2570660,0.356  
8,14.089,rs7824876,0.397  
8,14.125,rs6992412,0.412  
8,14.148,rs7820429,0.408  
8,14.232,rs6559122,0.368  
8,14.262,rs4537324,0.362  
8,14.397,rs12675721,0.355  
8,14.424,rs13261309,0.362  
8,14.444,rs7005444,0.380  
8,14.539,rs4840830,0.390  
8,14.541,rs17076494,0.379  
8,14.550,rs4840841,0.332  
8,14.665,rs1057187,0.272

8,14.732,rs2442517,0.271  
8,14.743,rs2442513,0.273  
8,14.831,rs3020285,0.292  
8,14.879,rs2442477,0.301  
8,14.954,rs6990020,0.293  
8,14.974,rs2442598,0.283  
8,14.977,rs17623313,0.281  
8,14.991,rs4478599,0.305  
8,15.088,rs2959779,0.252  
8,15.093,rs3020246,0.250  
8,15.102,rs9657427,0.248  
8,15.123,rs2442562,0.247  
8,15.126,rs17631450,0.249  
8,15.207,rs2042668,0.309  
8,15.434,rs6559174,0.306  
8,15.438,rs6559175,0.306  
8,15.474,rs6559176,0.313  
8,15.479,rs1014199,0.313  
8,15.926,rs7012528,0.278  
8,16.027,rs2912089,0.272  
8,16.063,rs9693942,0.282  
8,16.098,rs12381471,0.298  
8,16.132,rs9773025,0.314  
8,16.242,rs2977790,0.384  
8,16.244,rs6989229,0.384  
8,16.263,rs2741108,0.393  
8,16.312,rs7826831,0.418  
8,16.322,rs2741718,0.423  
8,16.391,rs7461956,0.416  
8,16.415,rs712276,0.445  
8,16.428,rs2702938,0.463  
8,16.445,rs2738100,0.469  
8,16.516,rs12680018,0.473  
8,16.674,rs4512398,0.434  
8,16.751,rs4392921,0.439  
8,16.777,rs7834209,0.439  
8,17.008,rs4840674,0.397  
8,20.128,rs2979224,0.161  
8,20.185,rs4840939,0.164  
8,20.225,rs2921010,0.168  
8,20.340,rs13277477,0.198  
8,20.437,rs876954,0.207  
8,20.616,rs7822872,0.202  
8,20.645,rs6994806,0.202  
8,20.677,rs7837584,0.214  
8,20.774,rs7843504,0.215  
8,20.995,rs9693402,0.214  
8,21.306,rs2428,0.187  
8,21.399,rs950721,0.207  
8,21.481,rs387706,0.162  
8,21.519,rs10108954,0.183  
8,21.559,rs410487,0.180  
8,21.599,rs332017,0.170  
8,22.020,rs2100021,0.143  
8,22.184,rs17155367,0.145  
8,22.203,rs1011158,0.142  
8,22.215,rs17657675,0.137  
8,22.221,rs330085,0.135  
8,22.225,rs330069,0.134  
8,22.245,rs6989535,0.147  
8,22.248,rs1993596,0.156

8,22.255,rs4240625,0.175  
8,22.262,rs1574517,0.185  
8,22.308,rs11249929,0.207  
8,22.389,rs9644708,0.236  
8,22.473,rs7820910,0.280  
8,22.475,rs587059,0.281  
8,22.481,rs7815168,0.283  
8,22.580,rs2975696,0.333  
8,22.582,rs2975684,0.335  
8,22.584,rs6997416,0.338  
8,22.587,rs7001821,0.342  
8,22.607,rs12680918,0.355  
8,22.608,rs7816713,0.356  
8,22.627,rs11249994,0.369  
8,22.631,rs17151885,0.377  
8,22.647,rs10903327,0.406  
8,22.651,rs17151969,0.407  
8,22.665,rs4840487,0.447  
8,22.691,rs7011457,0.418  
8,22.704,rs4841386,0.431  
8,22.709,rs4841394,0.435  
8,22.716,rs4404875,0.442  
8,22.720,rs11986177,0.444  
8,22.743,rs7823200,0.461  
8,22.755,rs12544976,0.461  
8,22.811,rs2409667,0.411  
8,22.929,rs17152978,0.375  
8,23.032,rs2898280,0.327  
8,23.064,rs3816668,0.338  
8,23.074,rs2898290,0.380  
8,23.080,rs11783137,0.381  
8,23.090,rs2249831,0.389  
8,23.099,rs2100965,0.385  
8,23.101,rs1564265,0.386  
8,23.141,rs804282,0.427  
8,23.152,rs6982453,0.434  
8,23.153,rs1043180,0.435  
8,23.181,rs1293288,0.458  
8,23.198,rs4272426,0.461  
8,23.218,rs9644758,0.465  
8,23.227,rs4841662,0.460  
8,23.513,rs4437649,0.353  
8,23.523,rs6530980,0.349  
8,23.546,rs6981317,0.339  
8,23.547,rs4602886,0.346  
8,23.548,rs12548516,0.351  
8,23.552,rs4574847,0.357  
8,23.554,rs7834631,0.347  
8,23.560,rs6991079,0.413  
8,23.606,rs530515,0.380  
8,23.629,rs579253,0.383  
8,23.786,rs601101,0.403  
8,23.834,rs507846,0.404  
8,24.409,rs532841,0.387  
8,24.644,rs12541254,0.464  
8,24.658,rs9325866,0.512  
8,24.699,rs10503435,0.524  
8,24.827,rs7015031,0.551  
8,24.892,rs10109292,0.546  
8,25.249,rs7814428,0.566  
8,25.253,rs4376497,0.566

8,25.287,rs11987048,0.594  
8,25.296,rs10089628,0.571  
8,25.297,rs1160220,0.569  
8,25.315,rs6989489,0.593  
8,25.360,rs11203501,0.679  
8,25.361,rs10503462,0.662  
8,25.362,rs10089460,0.631  
8,25.374,rs7008403,0.599  
8,25.387,rs3849006,0.570  
8,25.397,rs1947919,0.561  
8,25.434,rs1973227,0.526  
8,25.479,rs2054608,0.487  
8,25.525,rs968864,0.461  
8,25.526,rs7016993,0.460  
8,25.559,rs1520752,0.421  
8,25.587,rs4268131,0.393  
8,25.601,rs11780201,0.388  
8,25.616,rs7828991,0.383  
8,25.618,rs10503468,0.381  
8,25.631,rs17118370,0.372  
8,25.641,rs12682570,0.365  
8,25.644,rs11203571,0.364  
8,25.711,rs3888260,0.399  
8,25.715,rs7841810,0.400  
8,25.765,rs13266960,0.429  
8,25.769,rs17118860,0.431  
8,25.780,rs9886428,0.433  
8,25.880,rs6530767,0.460  
8,25.917,rs1903597,0.471  
8,25.932,rs3848991,0.470  
8,25.947,rs12682277,0.469  
8,25.967,rs17119719,0.468  
8,25.973,rs4831602,0.471  
8,26.004,rs11203633,0.487  
8,26.016,rs12542406,0.492  
8,26.034,rs6983709,0.500  
8,26.060,rs10097849,0.526  
8,26.126,rs6980965,0.556  
8,26.132,rs7846701,0.559  
8,26.173,rs4831658,0.516  
8,26.175,rs4345555,0.510  
8,26.190,rs17120493,0.466  
8,26.192,rs13251017,0.461  
8,26.194,rs10216426,0.451  
8,26.194,rs7815606,0.449  
8,26.203,rs7844246,0.458  
8,26.203,rs1869578,0.459  
8,26.217,rs7832875,0.468  
8,26.226,rs4831685,0.475  
8,26.230,rs478019,0.479  
8,26.230,rs554891,0.479  
8,26.232,rs11997676,0.475  
8,26.244,rs573856,0.442  
8,26.294,rs12544670,0.511  
8,26.294,rs7827335,0.511  
8,26.308,rs6985514,0.566  
8,26.317,rs17675663,0.574  
8,26.325,rs2604316,0.584  
8,26.337,rs2736070,0.593  
8,26.344,rs2736043,0.640  
8,26.450,rs10108727,0.709

8,26.474,rs4291272,0.723  
8,26.478,rs7012411,0.719  
8,26.566,rs2898432,0.623  
8,26.738,rs4831803,0.631  
8,26.889,rs1484751,0.643  
8,26.977,rs899683,0.671  
8,27.145,rs1429644,0.713  
8,27.153,rs1366960,0.715  
8,27.580,rs11780907,0.772  
8,27.727,rs822278,0.823  
8,27.841,rs7012141,0.855  
8,27.877,rs822241,0.862  
8,27.939,rs6996349,0.864  
8,27.981,rs971797,0.831  
8,28.021,rs652078,0.818  
8,28.081,rs611863,0.836  
8,28.094,rs635070,0.844  
8,28.103,rs572151,0.848  
8,28.173,rs6990377,0.980  
8,28.195,rs1565741,1.011  
8,28.305,rs823602,1.208  
8,28.342,rs2055092,1.246  
8,28.410,rs709845,1.334  
8,28.412,rs850429,1.349  
8,28.419,rs2517010,1.481  
8,28.491,rs2285261,1.525  
8,28.601,rs2213901,1.475  
8,28.623,rs4922265,1.501  
8,28.627,rs6984752,1.504  
8,28.648,rs2705195,1.517  
8,28.939,rs1858709,1.454  
8,28.948,rs4593587,1.518  
8,29.049,rs10087746,1.359  
8,29.065,rs17124483,1.388  
8,29.108,rs1003299,1.294  
8,29.131,rs13271465,1.290  
8,29.188,rs4554505,1.385  
8,29.264,rs4921552,1.398  
8,29.269,rs2720540,1.410  
8,29.316,rs2705084,1.436  
8,29.327,rs2588233,1.440  
8,29.366,rs2720588,1.430  
8,29.408,rs9792165,1.293  
8,29.428,rs2588152,1.213  
8,29.436,rs2246488,1.194  
8,29.593,rs7000487,1.210  
8,29.621,rs374386,1.289  
8,29.629,rs10503603,1.293  
8,29.697,rs2904748,1.264  
8,29.757,rs17125353,1.286  
8,29.868,rs10503644,1.326  
8,30.262,rs17692671,1.250  
8,30.323,rs11774166,1.182  
8,30.422,rs987341,1.195  
8,30.459,rs6992951,1.149  
8,30.609,rs17126406,1.241  
8,30.624,rs17594712,1.250  
8,30.658,rs7357578,1.264  
8,30.764,rs1602782,1.300  
8,30.784,rs13254048,1.302  
8,30.892,rs6998197,1.304



8,30.929,rs2201554,1.293  
8,30.951,rs7817770,1.345  
8,31.014,rs13250636,1.330  
8,31.139,rs2717728,1.256  
8,31.195,rs12675535,1.238  
8,31.214,rs2634449,1.241  
8,31.331,rs722311,1.255  
8,31.339,rs11785801,1.256  
8,31.371,rs11990818,1.259  
8,31.372,rs12676446,1.259  
8,31.539,rs13439396,1.362  
8,31.548,rs1473482,1.364  
8,31.597,rs12541534,1.373  
8,31.655,rs335246,1.382  
8,31.699,rs11778064,1.388  
8,31.712,rs2638659,1.410  
8,31.765,rs6982585,1.350  
8,31.775,rs7833694,1.346  
8,31.947,rs12155975,1.330  
8,31.982,rs17127474,1.343  
8,32.090,rs10216388,1.379  
8,32.207,rs7838501,1.348  
8,32.255,rs1027803,1.334  
8,32.267,rs17127771,1.354  
8,32.274,rs1472834,1.365  
8,32.297,rs10101681,1.318  
8,32.298,rs6651477,1.318  
8,32.326,rs10108465,1.314  
8,32.332,rs4921994,1.290  
8,32.342,rs2048091,1.250  
8,32.409,rs692512,1.317  
8,32.498,rs12544783,1.340  
8,32.528,rs6982478,1.405  
8,32.552,rs1619605,1.421  
8,32.585,rs1193327,1.455  
8,32.590,rs12544391,1.456  
8,32.635,rs1915418,1.466  
8,32.664,rs1877856,1.517  
8,32.679,rs11786215,1.521  
8,32.712,rs9644625,1.548  
8,32.713,rs2683279,1.549  
8,32.902,rs11995233,1.608  
8,33.038,rs11204038,1.627  
8,33.103,rs7835461,1.631  
8,33.402,rs13255998,1.545  
8,33.504,rs2975419,1.636  
8,33.506,rs17128749,1.616  
8,33.508,rs4921662,1.598  
8,33.510,rs10503658,1.571  
8,33.512,rs2979874,1.556  
8,33.532,rs10283283,1.565  
8,33.560,rs7003476,1.572  
8,33.594,rs923768,1.666  
8,33.695,rs10503661,1.857  
8,33.702,rs1388943,1.863  
8,33.746,rs6983139,1.962  
8,33.748,rs10503663,1.963  
8,33.797,rs6996964,1.976  
8,33.948,rs1316738,2.006  
8,34.021,rs767145,2.153  
8,34.071,rs7822518,2.203

8,34.072,rs3898938,2.204  
8,34.156,rs7009128,2.260  
8,34.208,rs253,2.290  
8,34.338,rs2410630,2.352  
8,34.414,rs4424271,2.598  
8,34.435,rs1018077,2.627  
8,34.436,rs1039122,2.628  
8,34.450,rs10503670,2.642  
8,34.493,rs7841346,2.673  
8,34.505,rs1390939,2.679  
8,34.557,rs952149,2.753  
8,34.557,rs952148,2.668  
8,34.582,rs4921697,2.671  
8,34.597,rs1532445,2.681  
8,34.604,rs10107110,2.709  
8,34.604,rs17092214,2.714  
8,34.607,rs4922151,2.806  
8,34.616,rs7835387,2.829  
8,34.645,rs17412325,2.897  
8,34.651,rs4921702,2.911  
8,34.662,rs1021201,2.912  
8,34.686,rs17092273,2.917  
8,34.838,rs6993760,2.922  
8,34.904,rs9325872,2.833  
8,34.936,rs2198011,2.823  
8,35.077,rs2259029,2.818  
8,35.095,rs17493272,2.818  
8,35.141,rs1868664,2.816  
8,35.365,rs7000415,2.704  
8,35.555,rs4961396,2.741  
8,35.695,rs17605349,2.691  
8,35.759,rs510395,2.767  
8,35.845,rs536554,2.768  
8,35.944,rs7821595,2.762  
8,35.977,rs11204153,2.758  
8,36.127,rs7813936,2.789  
8,36.254,rs12549890,2.800  
8,36.255,rs11990863,2.799  
8,36.303,rs898647,2.797  
8,36.352,rs2613671,2.836  
8,36.527,rs17093744,3.133  
8,36.590,rs2631879,3.237  
8,36.610,rs6998973,3.266  
8,36.631,rs1841195,3.301  
8,36.679,rs2631889,3.359  
8,36.794,rs2045563,3.625  
8,36.802,rs999055,3.652  
8,36.833,rs4739199,3.732  
8,36.841,rs4606049,3.756  
8,36.870,rs1964328,3.805  
8,37.088,rs7013365,3.897  
8,37.296,rs1564480,3.740  
8,37.459,rs6984623,3.961  
8,37.553,rs4739285,3.976  
8,37.603,rs6587004,4.112  
8,37.630,rs11786696,3.967  
8,37.630,rs6587006,3.963  
8,37.807,rs922504,3.781  
8,38.250,rs10097055,3.457  
8,38.252,rs7812993,3.391  
8,38.311,rs3857979,3.327

8,38.448,rs7831190,2.973  
8,38.507,rs4565458,2.817  
8,38.548,rs6986916,2.768  
8,38.676,rs12545568,2.615  
8,38.950,rs1600877,2.617  
8,39.310,rs11985023,2.390  
8,39.325,rs17088531,2.370  
8,39.404,rs4872533,2.248  
8,39.436,rs7388527,2.231  
8,39.441,rs1047406,2.227  
8,39.635,rs7841894,2.126  
8,39.647,rs17088602,2.109  
8,39.720,rs1877674,1.993  
8,39.817,rs17676811,1.974  
8,39.976,rs4872011,1.947  
8,40.084,rs17088625,1.871  
8,40.331,rs12677017,1.862  
8,40.624,rs1876875,1.844  
8,40.803,rs11785599,1.733  
8,40.811,rs7834266,1.725  
8,40.846,rs11135693,1.614  
8,40.928,rs7843320,1.534  
8,40.944,rs4242391,1.584  
8,40.953,rs13257094,1.777  
8,40.953,rs7464769,1.786  
8,41.007,rs2230229,1.801  
8,41.022,rs6557634,1.785  
8,41.090,rs3736025,1.761  
8,41.095,rs4581063,1.758  
8,41.121,rs17089022,1.796  
8,41.137,rs2272761,1.712  
8,41.147,rs2280937,1.722  
8,41.150,rs3808528,1.725  
8,41.161,rs11135724,1.781  
8,41.180,rs11775841,1.747  
8,41.196,rs883524,1.711  
8,41.255,rs8180974,1.740  
8,41.258,rs7017737,1.739  
8,41.392,rs732563,1.762  
8,41.424,rs11775345,1.768  
8,41.456,rs1008856,1.816  
8,41.478,rs2978473,1.847  
8,41.504,rs3174040,1.836  
8,41.553,rs11135759,1.878  
8,41.570,rs7003364,1.898  
8,41.627,rs1512268,1.751  
8,41.660,rs4872179,1.747  
8,41.682,rs7844903,1.747  
8,41.742,rs310282,1.745  
8,41.755,rs7832345,1.745  
8,41.755,rs192841,1.745  
8,41.871,rs1369836,1.741  
8,41.909,rs819198,1.789  
8,41.980,rs1731263,1.825  
8,42.161,rs7016438,1.826  
8,42.312,rs17051701,1.811  
8,42.430,rs436760,1.788  
8,42.512,rs7829965,1.653  
8,42.524,rs4242406,1.633  
8,42.531,rs13279576,1.627  
8,42.733,rs4472524,1.711

8,42.761,rs7831504,1.712  
8,42.820,rs11135811,1.719  
8,43.028,rs1824190,1.797  
8,43.067,rs984923,1.786  
8,43.122,rs7010085,1.754  
8,43.277,rs169061,1.603  
8,43.306,rs17830392,1.556  
8,43.352,rs13264292,1.486  
8,43.399,rs1527033,1.433  
8,43.504,rs879958,1.346  
8,43.592,rs11774796,1.378  
8,43.622,rs1510758,1.392  
8,43.740,rs907157,1.475  
8,43.803,rs11783334,1.448  
8,43.805,rs2433086,1.448  
8,43.809,rs17802005,1.489  
8,43.814,rs993047,1.538  
8,43.819,rs881367,1.531  
8,43.843,rs2433101,1.501  
8,43.859,rs11997651,1.482  
8,44.037,rs1978544,1.502  
8,44.093,rs4872367,1.505  
8,44.143,rs17054447,1.488  
8,44.248,rs6991347,1.451  
8,44.343,rs17237257,1.373  
8,44.345,rs17237292,1.371  
8,44.364,rs4872381,1.357  
8,44.378,rs17054698,1.348  
8,44.391,rs6991575,1.339  
8,44.401,rs11984569,1.332  
8,44.419,rs7001120,1.313  
8,44.422,rs10866846,1.311  
8,44.568,rs6557880,1.253  
8,44.630,rs11787090,1.308  
8,44.659,rs2976302,1.287  
8,44.686,rs6987909,1.272  
8,44.791,rs10098922,1.230  
8,44.828,rs13250131,1.226  
8,44.876,rs4531067,1.219  
8,44.952,rs17245857,1.209  
8,44.962,rs4602893,1.208  
8,45.036,rs9650418,1.220  
8,45.090,rs7838409,1.242  
8,45.250,rs1042992,1.313  
8,45.292,rs6557919,1.332  
8,45.553,rs424138,1.361  
8,45.593,rs327234,1.362  
8,45.738,rs7845740,1.367  
8,45.821,rs7820310,1.379  
8,45.842,rs2028554,1.383  
8,45.868,rs6998714,1.363  
8,45.880,rs1965328,1.365  
8,45.977,rs2055195,1.375  
8,46.042,rs13257637,1.589  
8,46.078,rs472151,1.732  
8,46.093,rs3102087,1.755  
8,46.118,rs11782159,1.772  
8,46.200,rs839201,1.797  
8,46.251,rs1481653,1.800  
8,46.401,rs7842266,1.838  
8,46.420,rs2874755,1.837

8,46.438,rs2014617,1.919  
8,47.159,rs11136015,1.921  
8,47.276,rs2726960,1.790  
8,47.288,rs6999364,1.781  
8,47.309,rs2685320,1.843  
8,47.353,rs2726942,1.817  
8,47.422,rs11787294,1.740  
8,47.448,rs1984880,1.648  
8,47.462,rs12549429,1.607  
8,47.475,rs9644136,1.565  
8,47.478,rs13274329,1.559  
8,47.522,rs4732823,1.488  
8,47.618,rs7840565,1.566  
8,47.677,rs2100814,1.595  
8,47.690,rs2722924,1.595  
8,47.711,rs13263030,1.586  
8,47.740,rs7825480,1.652  
8,47.752,rs351776,1.683  
8,47.883,rs11784510,1.700  
8,47.896,rs924184,1.697  
8,47.903,rs17059088,1.854  
8,47.907,rs1060411,1.890  
8,47.947,rs6992329,1.675  
8,47.985,rs1908916,1.697  
8,48.106,rs6980605,1.750  
8,48.216,rs352428,1.798  
8,48.231,rs6985395,1.800  
8,48.292,rs171302,1.797  
8,48.402,rs2237813,1.789  
8,48.450,rs241149,1.775  
8,49.014,rs6999630,1.438  
8,49.381,rs597695,1.273  
8,49.541,rs2637822,1.280  
8,49.605,rs2670683,1.304  
8,49.611,rs2175835,1.291  
8,49.640,rs6995249,1.227  
8,49.702,rs11786009,1.113  
8,49.708,rs2341797,1.105  
8,49.821,rs4295704,0.997  
8,49.952,rs6994244,0.910  
8,49.957,rs4732980,0.906  
8,50.052,rs12546747,0.833  
8,50.078,rs7016719,0.877  
8,50.233,rs6982080,0.787  
8,50.242,rs7813195,0.778  
8,50.248,rs7827693,0.846  
8,50.383,rs16876083,0.815  
8,50.427,rs12547428,0.802  
8,50.459,rs7386992,0.802  
8,50.534,rs10101117,0.825  
8,50.635,rs2595042,0.813  
8,50.663,rs9297181,0.799  
8,50.806,rs12386822,0.774  
8,51.176,rs4733476,0.713  
8,51.194,rs7015785,0.711  
8,51.272,rs9642710,0.707  
8,51.459,rs952774,0.677  
8,51.712,rs7812836,0.602  
8,51.943,rs7833229,0.572  
8,52.304,rs2543600,0.483  
8,52.363,rs2725344,0.468

8,52.412,rs1800392,0.452  
8,52.452,rs4398867,0.457  
8,52.472,rs2553244,0.460  
8,52.480,rs2737374,0.470  
8,52.501,rs10954782,0.493  
8,52.503,rs11998012,0.497  
8,52.521,rs4733070,0.553  
8,52.551,rs4609156,0.615  
8,52.573,rs4400341,0.681  
8,52.624,rs1836851,0.638  
8,52.659,rs10954784,0.642  
8,52.721,rs9792249,0.623  
8,52.743,rs11784670,0.642  
8,52.747,rs7817546,0.646  
8,52.769,rs4452759,0.616  
8,52.912,rs776404,0.507  
8,52.931,rs776385,0.499  
8,53.015,rs1481763,0.517  
8,53.031,rs16878890,0.525  
8,53.069,rs10503901,0.543  
8,53.081,rs989465,0.548  
8,53.088,rs6992010,0.551  
8,53.090,rs900102,0.550  
8,53.208,rs6985581,0.521  
8,53.226,rs17645417,0.528  
8,53.281,rs2466062,0.553  
8,53.287,rs3924999,0.520  
8,53.321,rs13259346,0.553  
8,53.338,rs6468122,0.561  
8,53.357,rs2976525,0.571  
8,53.682,rs9656744,0.480  
8,53.695,rs10100444,0.476  
8,53.893,rs6468141,0.418  
8,53.976,rs7815128,0.406  
8,54.086,rs1996363,0.395  
8,54.099,rs10954910,0.391  
8,54.127,rs13439524,0.378  
8,54.155,rs12114673,0.366  
8,54.182,rs4469412,0.356  
8,54.202,rs6997661,0.352  
8,54.349,rs4520153,0.308  
8,54.486,rs1950045,0.256  
8,54.500,rs1919344,0.250  
8,54.509,rs9297238,0.265  
8,54.514,rs10113333,0.269  
8,54.538,rs2579892,0.240  
8,54.877,rs7845368,0.190  
8,54.910,rs1946745,0.184  
8,54.912,rs17270119,0.184  
8,54.913,rs10112630,0.184  
8,54.946,rs16884264,0.186  
8,55.410,rs12114308,0.229  
8,55.432,rs7814863,0.158  
8,55.463,rs7831942,0.146  
8,55.542,rs7463174,0.119  
8,55.585,rs4976893,0.087  
8,55.603,rs16887042,0.081  
8,55.610,rs17433803,0.078  
8,55.663,rs12541064,0.074  
8,55.701,rs2070493,0.070  
8,55.738,rs7812866,0.066

8,56.189,rs6474491,0.034  
8,56.611,rs13248631,0.031  
8,56.783,rs328294,0.032  
8,56.907,rs921802,0.031  
8,56.915,rs4733924,0.031  
8,56.928,rs1466050,0.031  
8,56.968,rs7832232,0.031  
8,56.982,rs7818839,0.038  
8,56.999,rs1447057,0.034  
8,57.037,rs6983695,0.033  
8,57.048,rs6985355,0.042  
8,57.144,rs4394356,0.040  
8,57.174,rs6474512,0.047  
8,57.193,rs6998933,0.045  
8,57.200,rs7015219,0.045  
8,57.296,rs11985898,0.048  
8,57.467,rs6474131,0.069  
8,57.674,rs6474166,0.068  
8,57.711,rs201982,0.069  
8,57.714,rs2122987,0.069  
8,57.825,rs3808606,0.066  
8,57.845,rs13248917,0.075  
8,57.913,rs2955864,0.125  
8,57.917,rs2929106,0.129  
8,57.939,rs1904906,0.186  
8,57.940,rs16888736,0.188  
8,57.950,rs16888778,0.189  
8,57.962,rs10113242,0.188  
8,57.992,rs10504018,0.187  
8,58.062,rs2925034,0.189  
8,58.294,rs2168282,0.141  
8,58.325,rs909293,0.124  
8,58.326,rs210662,0.124  
8,58.345,rs3736646,0.120  
8,58.350,rs210676,0.121  
8,58.364,rs7013912,0.123  
8,58.405,rs210705,0.129  
8,58.469,rs210866,0.142  
8,58.512,rs891404,0.147  
8,58.681,rs10091962,0.163  
8,58.755,rs1429948,0.170  
8,58.776,rs2599675,0.164  
8,58.830,rs1451687,0.143  
8,58.837,rs1562906,0.138  
8,58.876,rs1111280,0.114  
8,59.128,rs7835606,0.109  
8,59.139,rs870478,0.109  
8,59.143,rs7837405,0.095  
8,59.143,rs868586,0.077  
8,59.149,rs13264148,0.079  
8,59.174,rs1022194,0.086  
8,59.277,rs11783346,0.123  
8,59.370,rs6995294,0.135  
8,59.508,rs3847182,0.138  
8,60.082,rs7007458,0.128  
8,60.109,rs13266712,0.127  
8,60.188,rs10958660,0.129  
8,60.736,rs1127379,0.124  
8,60.930,rs968427,0.095  
8,60.939,rs717218,0.100  
8,60.940,rs4736805,0.101

8,60.944,rs6474334,0.104  
8,60.954,rs16890610,0.111  
8,60.964,rs7819949,0.110  
8,60.974,rs7837006,0.114  
8,60.975,rs17600200,0.114  
8,60.995,rs7016707,0.131  
8,60.997,rs521184,0.132  
8,60.999,rs6981979,0.137  
8,61.011,rs1362890,0.165  
8,61.012,rs2883727,0.164  
8,61.013,rs7833494,0.162  
8,61.015,rs4737018,0.160  
8,61.017,rs10101217,0.153  
8,61.020,rs4737021,0.139  
8,61.035,rs7008906,0.147  
8,61.044,rs12546107,0.158  
8,61.059,rs13270574,0.161  
8,61.108,rs2978457,0.145  
8,61.116,rs13281070,0.142  
8,61.153,rs16891604,0.141  
8,61.167,rs6474422,0.140  
8,62.125,rs4608108,0.186  
8,62.176,rs7003908,0.206  
8,62.193,rs8178017,0.210  
8,62.219,rs4873777,0.205  
8,62.232,rs7005646,0.203  
8,62.232,rs7004442,0.203  
8,62.472,rs1828494,0.178  
8,62.778,rs7828647,0.157  
8,62.975,rs13273663,0.156  
8,63.782,rs10102468,0.240  
8,63.917,rs12335199,0.253  
8,64.096,rs2017341,0.270  
8,64.156,rs17181677,0.292  
8,64.225,rs6473628,0.351  
8,64.228,rs16916554,0.351  
8,64.229,rs7834664,0.351  
8,64.250,rs16916598,0.349  
8,64.423,rs12545812,0.397  
8,64.459,rs10504130,0.405  
8,64.513,rs3815868,0.418  
8,64.640,rs2360805,0.449  
8,64.676,rs7830945,0.456  
8,64.830,rs714048,0.484  
8,64.899,rs10504140,0.496  
8,64.999,rs7824696,0.512  
8,65.085,rs13258413,0.516  
8,65.274,rs1965704,0.526  
8,65.314,rs16917805,0.509  
8,65.390,rs3758126,0.419  
8,65.489,rs10958322,0.419  
8,65.521,rs984309,0.386  
8,65.594,rs17252015,0.363  
8,65.675,rs6473743,0.345  
8,65.741,rs3860850,0.291  
8,65.809,rs569706,0.299  
8,65.813,rs2588084,0.299  
8,65.870,rs7824346,0.294  
8,66.066,rs1373387,0.279  
8,66.153,rs1425898,0.264  
8,66.178,rs966247,0.263



8,66.221,rs6985606,0.249  
8,66.460,rs10958357,0.209  
8,66.480,rs2008573,0.207  
8,66.622,rs10504154,0.215  
8,66.638,rs11992458,0.216  
8,67.097,rs7016502,0.247  
8,67.133,rs11783925,0.249  
8,67.230,rs12708158,0.246  
8,67.264,rs11783652,0.243  
8,67.411,rs311396,0.213  
8,67.426,rs2719355,0.186  
8,67.428,rs895822,0.203  
8,67.429,rs2594797,0.210  
8,67.429,rs2956788,0.210  
8,67.430,rs1349101,0.209  
8,67.433,rs16920210,0.208  
8,67.443,rs10108776,0.180  
8,67.446,rs9657161,0.180  
8,67.447,rs12674538,0.185  
8,67.449,rs4739035,0.225  
8,67.451,rs16920613,0.226  
8,67.501,rs1396895,0.241  
8,67.567,rs11996465,0.226  
8,67.614,rs10958434,0.215  
8,67.682,rs3934874,0.202  
8,67.862,rs1480764,0.185  
8,67.954,rs7009231,0.182  
8,68.093,rs4737297,0.164  
8,68.098,rs6998105,0.165  
8,68.167,rs1506672,0.179  
8,68.190,rs951256,0.161  
8,68.193,rs2929032,0.158  
8,68.198,rs1395393,0.150  
8,68.210,rs4236995,0.142  
8,68.216,rs10107657,0.140  
8,68.224,rs4737395,0.128  
8,68.225,rs7011147,0.127  
8,68.237,rs7816281,0.114  
8,68.248,rs7827790,0.108  
8,68.252,rs7820484,0.106  
8,68.255,rs1397976,0.104  
8,68.261,rs7828258,0.108  
8,68.271,rs12674523,0.117  
8,68.278,rs4641033,0.126  
8,68.292,rs7833986,0.145  
8,68.297,rs7826445,0.145  
8,68.440,rs7007715,0.155  
8,68.469,rs12543030,0.162  
8,68.517,rs7011835,0.174  
8,68.535,rs1866823,0.205  
8,68.536,rs6474069,0.206  
8,68.562,rs2610027,0.176  
8,68.580,rs2582413,0.156  
8,68.627,rs10097622,0.161  
8,68.943,rs1834413,0.152  
8,68.981,rs9298556,0.150  
8,69.004,rs7821860,0.144  
8,69.049,rs7812952,0.132  
8,69.056,rs889975,0.130  
8,69.084,rs11786143,0.113  
8,69.131,rs8718,0.085

8,69.217,rs6474097,0.068  
8,69.379,rs10089625,0.055  
8,69.528,rs10957001,0.046  
8,69.620,rs10099945,0.044  
8,69.716,rs6992409,0.050  
8,69.742,rs10957014,0.051  
8,69.761,rs4737472,0.052  
8,69.794,rs1436001,0.044  
8,69.823,rs1157270,0.041  
8,69.844,rs10091209,0.041  
8,69.847,rs1436006,0.041  
8,69.862,rs6997028,0.042  
8,69.894,rs6988560,0.049  
8,69.942,rs4737483,0.047  
8,69.951,rs6987258,0.046  
8,70.002,rs11780747,0.044  
8,70.010,rs10100238,0.044  
8,70.037,rs16923020,0.079  
8,70.070,rs7010991,0.078  
8,70.086,rs4738648,0.079  
8,70.093,rs2939966,0.082  
8,70.139,rs6471689,0.070  
8,70.151,rs2977370,0.073  
8,70.280,rs4379435,0.107  
8,70.285,rs13268967,0.107  
8,70.286,rs930872,0.107  
8,70.286,rs10504253,0.107  
8,70.452,rs2680903,0.109  
8,70.454,rs2255834,0.109  
8,70.461,rs7841618,0.108  
8,70.499,rs973807,0.101  
8,70.511,rs4737508,0.102  
8,70.534,rs13266837,0.104  
8,70.578,rs2634507,0.105  
8,70.601,rs16923878,0.110  
8,70.622,rs998791,0.121  
8,70.625,rs10957071,0.112  
8,70.632,rs826727,0.076  
8,70.680,rs6984917,0.073  
8,70.697,rs1562612,0.074  
8,70.748,rs1463140,0.074  
8,70.824,rs10504272,0.076  
8,70.931,rs4737532,0.069  
8,71.004,rs396720,0.065  
8,71.006,rs4737534,0.065  
8,71.139,rs10112035,0.059  
8,71.561,rs12375413,0.087  
8,71.572,rs7006620,0.087  
8,71.623,rs7837791,0.087  
8,71.789,rs6987780,0.085  
8,71.837,rs12680662,0.086  
8,71.889,rs11775907,0.087  
8,71.968,rs10957100,0.068  
8,72.078,rs10957108,0.058  
8,72.136,rs6471842,0.055  
8,72.482,rs6984526,0.091  
8,72.592,rs6982717,0.106  
8,72.721,rs7013829,0.113  
8,72.989,rs623917,0.129  
8,73.088,rs10957157,0.133  
8,73.107,rs13256023,0.134

8,73.308,rs4237042,0.144  
8,73.336,rs13251621,0.144  
8,73.344,rs6984384,0.144  
8,73.379,rs7846503,0.149  
8,73.410,rs4554462,0.160  
8,73.451,rs12678105,0.186  
8,73.546,rs1962862,0.230  
8,73.547,rs1871217,0.230  
8,73.576,rs12548301,0.233  
8,73.637,rs2979419,0.229  
8,73.727,rs10104116,0.220  
8,74.121,rs10094788,0.226  
8,74.737,rs4625030,0.222  
8,74.775,rs6985520,0.222  
8,74.789,rs4269537,0.222  
8,74.797,rs7009135,0.208  
8,74.801,rs1580702,0.226  
8,74.803,rs1495008,0.210  
8,74.804,rs13260889,0.194  
8,74.833,rs7824027,0.190  
8,74.835,rs6471977,0.190  
8,74.841,rs657284,0.189  
8,74.853,rs344220,0.188  
8,74.863,rs12675739,0.186  
8,74.909,rs6995731,0.180  
8,74.983,rs12544945,0.203  
8,75.054,rs17265947,0.227  
8,75.074,rs1455576,0.232  
8,75.095,rs16930057,0.232  
8,75.132,rs6472077,0.228  
8,75.175,rs4739066,0.221  
8,75.226,rs12114802,0.226  
8,75.236,rs7465268,0.227  
8,75.237,rs12156261,0.227  
8,75.239,rs7003951,0.225  
8,75.243,rs6472089,0.194  
8,75.282,rs6472100,0.141  
8,75.286,rs10112358,0.141  
8,75.340,rs1431586,0.145  
8,75.401,rs7827889,0.148  
8,75.603,rs919037,0.162  
8,75.611,rs2114018,0.163  
8,75.637,rs10093096,0.167  
8,75.773,rs16930969,0.207  
8,75.913,rs7836768,0.253  
8,75.941,rs1376771,0.239  
8,75.949,rs6981465,0.238  
8,76.003,rs10808738,0.265  
8,76.014,rs2002700,0.285  
8,76.027,rs7004914,0.287  
8,76.083,rs2956305,0.302  
8,76.091,rs7842129,0.303  
8,76.143,rs12544654,0.316  
8,76.178,rs4294223,0.332  
8,76.183,rs4737206,0.302  
8,76.287,rs7815138,0.308  
8,76.414,rs1473603,0.292  
8,76.632,rs16932321,0.261  
8,76.633,rs17396080,0.261  
8,76.655,rs974149,0.257  
8,76.785,rs6472239,0.251

8,76.811,rs16932422,0.248  
8,76.820,rs2357668,0.220  
8,76.825,rs9298109,0.220  
8,76.880,rs9643575,0.223  
8,76.884,rs16932561,0.222  
8,76.957,rs16932725,0.200  
8,76.964,rs11779466,0.197  
8,76.973,rs7819605,0.194  
8,77.008,rs1426908,0.198  
8,77.321,rs7006064,0.292  
8,77.482,rs12677893,0.319  
8,77.520,rs6472301,0.322  
8,77.637,rs4737846,0.332  
8,77.647,rs13275970,0.335  
8,77.653,rs900114,0.336  
8,77.699,rs13257028,0.332  
8,77.761,rs13250665,0.293  
8,77.763,rs7814240,0.289  
8,77.763,rs2553658,0.288  
8,77.775,rs2623859,0.278  
8,77.784,rs13274503,0.271  
8,77.813,rs10957397,0.278  
8,77.858,rs4737859,0.256  
8,77.918,rs4437632,0.268  
8,77.979,rs6472366,0.266  
8,78.031,rs6997672,0.231  
8,78.064,rs6472376,0.198  
8,78.092,rs4592016,0.168  
8,78.146,rs967258,0.149  
8,78.148,rs11990676,0.149  
8,78.169,rs13251311,0.152  
8,78.195,rs6984885,0.150  
8,78.205,rs17449325,0.146  
8,78.222,rs1155491,0.144  
8,78.225,rs2033581,0.144  
8,78.243,rs728032,0.138  
8,78.262,rs1404598,0.135  
8,78.287,rs10808759,0.135  
8,78.324,rs1404593,0.126  
8,78.347,rs12674787,0.120  
8,78.513,rs2138675,0.138  
8,78.535,rs2591003,0.138  
8,78.573,rs2676638,0.131  
8,78.726,rs13273576,0.108  
8,78.797,rs2164197,0.105  
8,78.900,rs6996725,0.090  
8,78.957,rs4374973,0.103  
8,79.023,rs2978233,0.099  
8,79.052,rs4145295,0.109  
8,79.147,rs9643401,0.179  
8,79.249,rs933938,0.252  
8,79.253,rs17692996,0.262  
8,79.261,rs2981060,0.281  
8,79.279,rs1344618,0.312  
8,79.289,rs514802,0.331  
8,79.311,rs590695,0.357  
8,79.345,rs16935654,0.366  
8,79.518,rs2655167,0.319  
8,79.780,rs6981344,0.414  
8,79.820,rs1155965,0.572  
8,79.915,rs4738003,0.715

8,79.968,rs4279601,0.789  
8,80.054,rs10103580,0.791  
8,80.057,rs16936279,0.792  
8,80.186,rs2933044,0.889  
8,80.202,rs2933039,0.942  
8,80.629,rs7846409,0.866  
8,80.654,rs9987098,0.867  
8,80.798,rs16936522,0.873  
8,80.896,rs4738050,0.881  
8,80.974,rs10095238,0.855  
8,80.996,rs17671921,0.862  
8,81.142,rs10808773,0.829  
8,81.215,rs4737292,0.904  
8,81.249,rs12678469,0.879  
8,81.277,rs7010162,0.881  
8,81.778,rs10504477,0.896  
8,81.811,rs9657093,0.895  
8,82.521,rs2639919,0.749  
8,82.668,rs11995646,0.708  
8,82.683,rs16937345,0.703  
8,82.718,rs7018254,0.688  
8,82.760,rs1075532,0.715  
8,82.807,rs7819928,0.701  
8,82.834,rs4579563,0.682  
8,82.997,rs10957545,0.566  
8,83.028,rs7831023,0.569  
8,83.029,rs7817242,0.569  
8,83.038,rs3779748,0.572  
8,83.045,rs4737316,0.534  
8,83.091,rs11775363,0.620  
8,83.096,rs4560821,0.581  
8,83.129,rs9643625,0.540  
8,83.181,rs11785552,0.531  
8,83.309,rs7824076,0.535  
8,83.364,rs1156154,0.537  
8,83.433,rs4738148,0.494  
8,83.434,rs16937735,0.494  
8,83.437,rs1863108,0.495  
8,83.444,rs10504511,0.497  
8,83.529,rs1424863,0.493  
8,83.532,rs2068674,0.492  
8,83.581,rs3890710,0.504  
8,83.641,rs4738157,0.488  
8,83.651,rs4305943,0.482  
8,83.665,rs10101539,0.471  
8,83.673,rs6472617,0.458  
8,83.680,rs6998291,0.460  
8,83.683,rs10091707,0.461  
8,83.691,rs4078227,0.459  
8,83.707,rs979451,0.455  
8,83.908,rs6472655,0.433  
8,83.930,rs1036963,0.432  
8,83.973,rs6996723,0.467  
8,83.976,rs959974,0.470  
8,84.081,rs7835630,0.437  
8,84.149,rs4737340,0.408  
8,84.181,rs11984631,0.412  
8,84.302,rs11778612,0.430  
8,84.317,rs922784,0.433  
8,84.342,rs7837478,0.431  
8,84.417,rs7844036,0.433

8,84.608,rs7827400,0.395  
8,84.653,rs10504537,0.385  
8,84.665,rs346613,0.381  
8,84.758,rs878927,0.383  
8,85.045,rs4738243,0.452  
8,85.348,rs1554781,0.456  
8,85.406,rs6985810,0.458  
8,86.150,rs4373559,0.489  
8,86.256,rs4143635,0.488  
8,86.284,rs1440332,0.428  
8,86.361,rs7822651,0.496  
8,86.370,rs6472714,0.500  
8,86.389,rs1482022,0.504  
8,86.393,rs2981092,0.504  
8,86.404,rs11786867,0.538  
8,86.506,rs10099824,0.445  
8,86.568,rs7006404,0.380  
8,86.609,rs6472748,0.369  
8,86.637,rs10808793,0.378  
8,86.642,rs2383878,0.378  
8,86.721,rs6472762,0.431  
8,86.730,rs2605877,0.436  
8,86.769,rs12681551,0.405  
8,86.820,rs6989495,0.365  
8,86.869,rs4363185,0.321  
8,86.920,rs6993015,0.289  
8,86.935,rs16938650,0.290  
8,87.015,rs7823459,0.305  
8,87.243,rs17223062,0.288  
8,87.524,rs12547746,0.319  
8,87.629,rs1392125,0.339  
8,87.645,rs16938782,0.341  
8,87.660,rs2036273,0.342  
8,87.706,rs4489317,0.341  
8,87.710,rs6472822,0.341  
8,87.760,rs4385459,0.324  
8,87.779,rs16938822,0.323  
8,87.885,rs6988935,0.334  
8,87.918,rs2975213,0.371  
8,87.943,rs7459665,0.429  
8,87.958,rs12550813,0.433  
8,88.009,rs6472867,0.446  
8,88.033,rs1365032,0.447  
8,88.035,rs10504583,0.447  
8,88.075,rs16938938,0.460  
8,88.165,rs2732018,0.489  
8,88.192,rs1122317,0.455  
8,88.199,rs2731995,0.443  
8,88.221,rs1455813,0.406  
8,88.243,rs1455805,0.430  
8,88.254,rs16939036,0.433  
8,88.289,rs12547658,0.443  
8,88.332,rs7015436,0.466  
8,88.363,rs16939060,0.483  
8,88.377,rs7840945,0.489  
8,88.401,rs2980248,0.463  
8,88.528,rs2167065,0.554  
8,88.597,rs7350068,0.545  
8,88.672,rs4735650,0.470  
8,88.688,rs16939202,0.472  
8,88.905,rs10504618,0.522

8,88.913,rs10504619,0.524  
8,88.931,rs2383971,0.530  
8,88.955,rs6472969,0.493  
8,88.970,rs11996335,0.470  
8,88.972,rs13281210,0.467  
8,89.011,rs9298282,0.471  
8,89.043,rs13279286,0.468  
8,89.160,rs17437854,0.464  
8,89.174,rs2733735,0.418  
8,89.181,rs16939378,0.430  
8,89.215,rs12550004,0.507  
8,89.242,rs6981577,0.564  
8,89.294,rs7016069,0.598  
8,89.300,rs12677622,0.602  
8,89.306,rs10098612,0.613  
8,89.327,rs10112573,0.655  
8,89.428,rs10102256,0.655  
8,89.508,rs7016717,0.671  
8,89.508,rs10504658,0.671  
8,89.540,rs4739176,0.671  
8,89.591,rs2200015,0.701  
8,89.595,rs6473088,0.708  
8,89.602,rs10504671,0.706  
8,89.716,rs967426,0.690  
8,89.728,rs10957895,0.695  
8,89.750,rs3739330,0.702  
8,89.778,rs2587155,0.702  
8,89.780,rs4739111,0.701  
8,89.796,rs10448016,0.733  
8,89.825,rs510494,0.794  
8,89.852,rs16906530,0.817  
8,89.880,rs1915554,0.833  
8,90.052,rs7840008,0.971  
8,90.064,rs4740122,0.980  
8,90.261,rs16907577,0.960  
8,90.268,rs7837761,0.959  
8,90.313,rs6473225,0.960  
8,90.399,rs9298338,0.926  
8,90.508,rs4587368,0.903  
8,90.575,rs272613,0.904  
8,90.600,rs446027,0.911  
8,90.662,rs272610,0.924  
8,90.710,rs11989997,0.932  
8,90.735,rs1026805,0.937  
8,91.403,rs7003901,1.078  
8,91.437,rs1445558,1.085  
8,91.529,rs895270,1.065  
8,91.630,rs6989890,1.010  
8,91.746,rs4237093,0.926  
8,91.759,rs10504730,0.939  
8,91.789,rs4480065,0.964  
8,91.855,rs6986622,0.947  
8,92.044,rs10504737,0.783  
8,92.047,rs10090760,0.780  
8,92.201,rs10100646,0.719  
8,92.204,rs7841723,0.718  
8,92.210,rs2102113,0.716  
8,92.264,rs10958016,0.706  
8,92.273,rs7012437,0.703  
8,92.624,rs16909306,0.567  
8,92.757,rs2581529,0.530

8,92.880,rs2300494,0.505  
8,92.912,rs10481273,0.498  
8,92.981,rs1507090,0.538  
8,93.132,rs16910336,0.553  
8,93.146,rs717498,0.554  
8,93.152,rs925673,0.555  
8,93.248,rs7833831,0.556  
8,93.254,rs7819717,0.556  
8,93.267,rs16910782,0.555  
8,93.300,rs9643765,0.551  
8,93.315,rs7842063,0.583  
8,93.367,rs10109906,0.565  
8,93.422,rs726723,0.586  
8,93.422,rs4739920,0.586  
8,93.469,rs1568528,0.583  
8,93.485,rs6987055,0.582  
8,93.582,rs1552548,0.574  
8,93.692,rs7818253,0.549  
8,93.807,rs1372461,0.468  
8,93.844,rs10808857,0.416  
8,93.860,rs6473525,0.416  
8,93.886,rs9298423,0.401  
8,93.894,rs10112823,0.402  
8,93.947,rs11998502,0.405  
8,94.100,rs1488708,0.413  
8,94.361,rs13278559,0.416  
8,94.406,rs9329911,0.418  
8,94.587,rs7016829,0.391  
8,94.640,rs2912494,0.381  
8,94.644,rs10504817,0.380  
8,94.676,rs17601573,0.378  
8,94.713,rs2721252,0.378  
8,94.751,rs4406372,0.382  
8,94.865,rs11781016,0.393  
8,94.900,rs1441249,0.385  
8,94.931,rs10504826,0.401  
8,94.944,rs7814749,0.403  
8,94.960,rs4961216,0.400  
8,94.963,rs10956972,0.400  
8,95.015,rs13269825,0.391  
8,95.053,rs6468587,0.399  
8,95.067,rs6468613,0.349  
8,95.082,rs2453449,0.308  
8,95.101,rs11986813,0.295  
8,95.142,rs1431761,0.291  
8,95.163,rs2878863,0.292  
8,95.195,rs4961016,0.293  
8,95.280,rs4961033,0.309  
8,95.296,rs7833495,0.312  
8,95.332,rs463809,0.319  
8,95.406,rs2616483,0.333  
8,95.410,rs17719138,0.339  
8,95.423,rs2616496,0.362  
8,95.440,rs2616506,0.391  
8,95.443,rs2664352,0.394  
8,95.451,rs13277637,0.399  
8,95.465,rs16878625,0.400  
8,95.593,rs3851539,0.409  
8,95.823,rs13257525,0.360  
8,95.879,rs10090518,0.368  
8,95.927,rs2454331,0.440



8,95.977,rs13260549,0.435  
8,96.014,rs2706820,0.434  
8,96.050,rs2046316,0.435  
8,96.106,rs13261143,0.443  
8,96.198,rs9297680,0.489  
8,96.202,rs311667,0.488  
8,96.205,rs557807,0.488  
8,96.211,rs218921,0.485  
8,96.213,rs160414,0.484  
8,96.284,rs40457,0.480  
8,96.448,rs1805873,0.476  
8,96.492,rs17623400,0.484  
8,96.983,rs4330650,0.594  
8,97.071,rs4501549,0.589  
8,97.082,rs11785003,0.599  
8,97.127,rs7459480,0.544  
8,97.128,rs6471275,0.544  
8,97.140,rs10504904,0.528  
8,97.143,rs9283962,0.525  
8,97.202,rs6471294,0.499  
8,97.230,rs12681007,0.484  
8,97.235,rs17732285,0.482  
8,97.237,rs4435678,0.518  
8,97.242,rs10095605,0.492  
8,97.244,rs1867307,0.482  
8,97.252,rs6992905,0.471  
8,97.263,rs2218367,0.453  
8,97.343,rs6471322,0.425  
8,97.379,rs2046395,0.434  
8,97.423,rs9657011,0.441  
8,97.482,rs1480889,0.451  
8,97.532,rs9297909,0.464  
8,97.569,rs3735912,0.490  
8,97.651,rs2291016,0.540  
8,97.658,rs6993453,0.546  
8,97.727,rs10097386,0.633  
8,98.101,rs7016705,0.650  
8,98.110,rs1847552,0.651  
8,98.166,rs172159,0.647  
8,98.195,rs279968,0.640  
8,98.225,rs279460,0.597  
8,98.252,rs279479,0.596  
8,98.307,rs278578,0.591  
8,98.316,rs7818649,0.593  
8,98.320,rs2623301,0.594  
8,98.405,rs1447314,0.621  
8,98.441,rs7002977,0.560  
8,98.450,rs16915833,0.551  
8,98.464,rs4735211,0.538  
8,98.471,rs1550883,0.527  
8,98.497,rs368998,0.488  
8,98.551,rs16915889,0.487  
8,98.656,rs7837480,0.555  
8,98.880,rs11995221,0.578  
8,98.886,rs2976370,0.577  
8,98.889,rs11786927,0.576  
8,98.918,rs17710303,0.573  
8,99.107,rs10100603,0.562  
8,99.123,rs7826194,0.563  
8,99.197,rs3133980,0.593  
8,99.255,rs4579497,0.648

8,99.263,rs2978129,0.695  
8,99.269,rs3018851,0.698  
8,99.306,rs2978142,0.693  
8,99.417,rs1051624,0.699  
8,99.478,rs10098632,0.689  
8,99.513,rs2607058,0.686  
8,99.525,rs2100602,0.695  
8,99.557,rs10216999,0.719  
8,99.573,rs17735424,0.732  
8,99.574,rs2514792,0.732  
8,99.777,rs935052,0.768  
8,99.904,rs2119461,0.776  
8,99.938,rs2114212,0.778  
8,100.095,rs6988635,0.765  
8,100.113,rs7837249,0.716  
8,100.352,rs4735337,0.714  
8,100.412,rs2599723,0.712  
8,100.496,rs10087402,0.716  
8,100.500,rs11781447,0.720  
8,100.504,rs4590408,0.725  
8,100.547,rs1470769,0.768  
8,100.623,rs7002762,0.635  
8,100.630,rs998980,0.628  
8,100.644,rs2514565,0.624  
8,100.660,rs730820,0.635  
8,100.663,rs894153,0.636  
8,100.729,rs1982872,0.644  
8,100.758,rs16893808,0.646  
8,100.792,rs4735360,0.628  
8,100.882,rs13268209,0.590  
8,100.909,rs2087791,0.581  
8,100.922,rs7824060,0.584  
8,101.026,rs1566516,0.575  
8,101.037,rs904924,0.580  
8,101.046,rs1472560,0.606  
8,101.061,rs3105001,0.608  
8,101.063,rs7011044,0.609  
8,101.090,rs3104992,0.560  
8,101.117,rs3104966,0.540  
8,101.201,rs895047,0.489  
8,101.231,rs7013599,0.471  
8,101.252,rs3099088,0.435  
8,101.256,rs3102484,0.430  
8,101.263,rs13280459,0.382  
8,101.303,rs6471558,0.373  
8,101.308,rs3102477,0.413  
8,101.314,rs3134497,0.421  
8,101.342,rs4263730,0.424  
8,101.369,rs3099096,0.417  
8,101.387,rs2873955,0.411  
8,101.411,rs16918205,0.394  
8,101.412,rs7007997,0.393  
8,101.424,rs550254,0.368  
8,101.442,rs1994222,0.337  
8,101.451,rs17768143,0.328  
8,101.505,rs10100514,0.304  
8,101.544,rs893222,0.305  
8,101.593,rs542253,0.294  
8,101.632,rs2255182,0.285  
8,101.643,rs6986442,0.281  
8,101.669,rs6985783,0.273

8,101.710,rs3808386,0.251  
8,101.749,rs2643341,0.237  
8,101.785,rs7013150,0.225  
8,101.806,rs10504962,0.222  
8,101.971,rs1348563,0.232  
8,101.979,rs12056723,0.231  
8,101.983,rs2439518,0.231  
8,102.010,rs7003874,0.225  
8,102.133,rs10955078,0.212  
8,102.151,rs750341,0.214  
8,102.179,rs7813101,0.220  
8,102.456,rs2319936,0.281  
8,102.773,rs2513361,0.376  
8,102.820,rs10504970,0.355  
8,102.829,rs2436051,0.359  
8,102.864,rs1155199,0.372  
8,102.929,rs12549505,0.383  
8,102.947,rs16895344,0.384  
8,102.948,rs7831704,0.383  
8,103.061,rs2635143,0.410  
8,103.105,rs11786542,0.420  
8,103.234,rs2448166,0.448  
8,103.240,rs663366,0.449  
8,103.258,rs499177,0.449  
8,103.262,rs6995779,0.450  
8,103.276,rs10808356,0.450  
8,103.405,rs7015322,0.429  
8,103.646,rs2513980,0.333  
8,103.752,rs2449535,0.310  
8,103.762,rs2512073,0.310  
8,103.775,rs7017753,0.309  
8,103.833,rs7815790,0.338  
8,103.876,rs2444907,0.317  
8,103.915,rs897189,0.318  
8,103.975,rs10098159,0.299  
8,103.991,rs2444895,0.296  
8,104.025,rs2255464,0.295  
8,104.085,rs2045806,0.332  
8,104.090,rs2514335,0.367  
8,104.098,rs6998768,0.412  
8,104.104,rs2306129,0.446  
8,104.125,rs2447500,0.475  
8,104.150,rs4735529,0.522  
8,104.188,rs16896695,0.592  
8,104.197,rs2514342,0.608  
8,104.224,rs736191,0.616  
8,104.281,rs7812348,0.633  
8,104.312,rs7831552,0.603  
8,104.314,rs4565432,0.564  
8,104.321,rs16896950,0.570  
8,104.323,rs10093553,0.569  
8,104.343,rs3802197,0.571  
8,104.463,rs10096329,0.581  
8,104.990,rs1449789,0.490  
8,105.095,rs11779445,0.454  
8,105.216,rs7015060,0.452  
8,105.228,rs3019086,0.451  
8,105.233,rs2979002,0.445  
8,105.249,rs2000479,0.434  
8,105.336,rs2154637,0.376  
8,105.513,rs4734459,0.363

8,105.521,rs7826305,0.362  
8,105.564,rs719870,0.352  
8,105.662,rs2000480,0.359  
8,105.799,rs16898600,0.362  
8,105.869,rs2469666,0.363  
8,106.012,rs3115892,0.366  
8,106.141,rs1693543,0.375  
8,106.304,rs2978107,0.386  
8,106.568,rs3105453,0.394  
8,106.647,rs7009643,0.387  
8,106.681,rs2135121,0.399  
8,106.805,rs13254653,0.371  
8,106.990,rs4002957,0.381  
8,107.009,rs12335167,0.371  
8,107.049,rs1026228,0.344  
8,107.070,rs7814838,0.343  
8,107.236,rs3019260,0.365  
8,107.250,rs6468757,0.363  
8,107.358,rs166995,0.363  
8,107.385,rs4734517,0.316  
8,107.425,rs869831,0.316  
8,107.455,rs2053741,0.310  
8,107.486,rs2004474,0.273  
8,107.712,rs746920,0.362  
8,107.718,rs1529605,0.364  
8,107.778,rs668179,0.363  
8,107.840,rs10505007,0.334  
8,108.018,rs1264477,0.353  
8,108.109,rs7005727,0.350  
8,108.112,rs474949,0.342  
8,108.135,rs539674,0.345  
8,108.144,rs508148,0.351  
8,108.147,rs2509765,0.353  
8,108.221,rs471757,0.374  
8,108.266,rs17476242,0.357  
8,108.279,rs666026,0.323  
8,108.320,rs523352,0.321  
8,108.388,rs6468782,0.316  
8,108.565,rs1111887,0.331  
8,108.829,rs10105774,0.349  
8,108.999,rs16868739,0.330  
8,109.103,rs718262,0.318  
8,109.202,rs16868879,0.305  
8,109.215,rs13248449,0.303  
8,109.266,rs6991144,0.298  
8,109.277,rs1573312,0.297  
8,109.283,rs1269701,0.299  
8,109.361,rs556388,0.322  
8,109.401,rs7833656,0.324  
8,109.426,rs6468813,0.322  
8,109.521,rs2067029,0.293  
8,109.526,rs1265122,0.286  
8,109.537,rs17509019,0.278  
8,109.545,rs1265138,0.272  
8,109.547,rs10505018,0.270  
8,109.638,rs2853229,0.251  
8,109.698,rs2978432,0.250  
8,109.759,rs16869360,0.248  
8,110.103,rs7836225,0.236  
8,110.204,rs7007146,0.224  
8,110.231,rs1347322,0.212

8,110.248,rs2436908,0.199  
8,110.258,rs16869559,0.192  
8,110.278,rs4734641,0.178  
8,110.283,rs2436893,0.175  
8,110.296,rs13263248,0.171  
8,110.315,rs2436916,0.166  
8,110.410,rs1978752,0.151  
8,110.439,rs6981411,0.145  
8,110.473,rs2099408,0.143  
8,110.497,rs9642980,0.128  
8,110.515,rs2513927,0.112  
8,110.546,rs1574480,0.087  
8,110.551,rs2511688,0.086  
8,110.559,rs2513941,0.084  
8,110.610,rs2513896,0.070  
8,110.637,rs4734668,0.061  
8,110.654,rs2513905,0.059  
8,110.694,rs10112564,0.057  
8,110.740,rs3808542,0.052  
8,110.849,rs2458285,0.056  
8,110.859,rs2460221,0.057  
8,110.885,rs525817,0.062  
8,111.020,rs2454039,0.091  
8,111.038,rs979671,0.094  
8,111.043,rs2047377,0.092  
8,111.044,rs16870112,0.087  
8,111.048,rs1497455,0.076  
8,111.070,rs1473541,0.080  
8,111.105,rs6468861,0.071  
8,111.115,rs7843452,0.071  
8,111.290,rs16870322,0.071  
8,111.449,rs3098218,0.067  
8,111.485,rs13439770,0.067  
8,112.018,rs10091132,0.073  
8,112.129,rs6992883,0.071  
8,112.137,rs2458413,0.071  
8,112.146,rs2853151,0.071  
8,112.152,rs2853160,0.071  
8,112.161,rs2669429,0.069  
8,112.212,rs987474,0.059  
8,112.225,rs1992214,0.057  
8,112.251,rs2085769,0.068  
8,112.275,rs284486,0.073  
8,112.301,rs6991677,0.077  
8,112.371,rs16872270,0.090  
8,112.391,rs2045672,0.094  
8,112.402,rs285802,0.092  
8,112.502,rs1903335,0.081  
8,112.541,rs6468994,0.085  
8,112.615,rs2929062,0.084  
8,112.672,rs7009208,0.097  
8,112.679,rs2622637,0.099  
8,112.683,rs302953,0.094  
8,112.686,rs302964,0.095  
8,112.709,rs1037306,0.099  
8,112.733,rs7015353,0.103  
8,112.770,rs2218279,0.109  
8,112.779,rs4734889,0.109  
8,112.781,rs10104574,0.109  
8,112.790,rs1442333,0.110  
8,112.794,rs6980689,0.111

8,112.830,rs10505085,0.127  
8,112.877,rs11996743,0.150  
8,113.031,rs1366963,0.166  
8,113.111,rs1503573,0.158  
8,113.151,rs7836368,0.191  
8,113.156,rs1954755,0.195  
8,113.157,rs2022979,0.196  
8,113.202,rs11990584,0.224  
8,113.230,rs7813598,0.230  
8,113.255,rs1453212,0.222  
8,113.265,rs3110776,0.222  
8,113.384,rs2449837,0.218  
8,113.397,rs16875176,0.217  
8,113.443,rs2447243,0.237  
8,113.454,rs1381485,0.240  
8,113.466,rs16875446,0.231  
8,113.527,rs2226405,0.188  
8,113.570,rs9643029,0.167  
8,113.674,rs1347183,0.178  
8,113.679,rs1433176,0.180  
8,113.766,rs13257142,0.211  
8,113.784,rs6469117,0.215  
8,113.872,rs10505110,0.241  
8,113.875,rs16876511,0.241  
8,113.879,rs281747,0.241  
8,113.887,rs1494971,0.232  
8,113.906,rs7006253,0.211  
8,113.919,rs4734156,0.203  
8,113.925,rs1469918,0.199  
8,113.982,rs7001159,0.213  
8,114.002,rs16892437,0.218  
8,114.009,rs2348081,0.220  
8,114.023,rs1299342,0.249  
8,114.040,rs12543507,0.253  
8,114.056,rs10092441,0.258  
8,114.081,rs1389976,0.262  
8,114.146,rs601558,0.241  
8,114.213,rs4735036,0.216  
8,114.390,rs2298605,0.184  
8,114.462,rs1375021,0.186  
8,114.701,rs2569201,0.206  
8,114.723,rs1874679,0.224  
8,114.739,rs1391201,0.230  
8,114.754,rs3019343,0.210  
8,114.781,rs3019359,0.165  
8,114.817,rs11995185,0.169  
8,115.077,rs4129682,0.111  
8,115.108,rs4644208,0.106  
8,115.435,rs10102228,0.057  
8,115.445,rs7463805,0.047  
8,115.449,rs1601181,0.022  
8,115.470,rs7813186,0.019  
8,115.490,rs10107566,0.020  
8,115.500,rs1605128,0.018  
8,115.522,rs996249,0.013  
8,115.523,rs16880318,0.013  
8,115.552,rs4147310,0.013  
8,115.581,rs2948998,0.010  
8,115.592,rs7832047,0.010  
8,115.677,rs1587014,0.010  
8,115.782,rs16881536,0.009

8,116.009,rs1573937,0.008  
8,116.459,rs1026490,0.001  
8,116.530,rs13270310,0.000  
8,116.545,rs10505203,0.000  
8,116.550,rs1513520,-0.000  
8,116.552,rs16884721,0.000  
8,116.663,rs6986020,0.002  
8,116.671,rs2044999,0.008  
8,116.679,rs11998298,0.009  
8,116.708,rs7827567,0.013  
8,116.712,rs966210,0.013  
8,116.746,rs7825514,0.013  
8,116.797,rs11988087,0.011  
8,116.919,rs13276268,0.007  
8,116.955,rs7000026,0.006  
8,117.043,rs7004742,0.005  
8,117.044,rs10086373,0.005  
8,117.077,rs10112994,0.005  
8,117.124,rs2036014,0.003  
8,117.135,rs16886947,0.007  
8,117.156,rs7836816,0.009  
8,117.177,rs777831,0.012  
8,117.182,rs16887197,0.013  
8,117.215,rs7833220,0.026  
8,117.227,rs7821862,0.028  
8,117.246,rs800899,0.030  
8,117.653,rs9297548,0.029  
8,117.835,rs17662374,0.018  
8,117.879,rs10505280,0.017  
8,117.924,rs8181015,0.016  
8,118.005,rs13439023,0.021  
8,118.072,rs13270180,0.026  
8,118.089,rs13278681,0.024  
8,118.185,rs6469650,0.017  
8,118.334,rs4876679,0.023  
8,118.386,rs6981342,0.010  
8,118.426,rs2921787,0.007  
8,118.477,rs1584220,0.004  
8,118.505,rs2921722,0.003  
8,118.702,rs2466293,0.003  
8,118.706,rs2466291,0.003  
8,118.747,rs17813547,0.009  
8,118.759,rs1793733,0.011  
8,118.787,rs1499439,0.014  
8,118.798,rs1793709,0.012  
8,118.808,rs1793703,0.007  
8,118.818,rs13277475,0.008  
8,118.858,rs11778621,0.015  
8,118.861,rs7819010,0.016  
8,118.868,rs3018441,0.017  
8,118.912,rs11994257,0.027  
8,118.923,rs732095,0.026  
8,118.957,rs3134388,0.019  
8,118.958,rs16890122,0.019  
8,118.980,rs7836738,0.023  
8,118.984,rs10113582,0.023  
8,119.017,rs13275942,0.028  
8,119.032,rs11562822,0.025  
8,119.057,rs11562698,0.023  
8,119.058,rs9649944,0.022  
8,119.064,rs2451157,0.013

8,119.065,rs11562721,0.013  
8,119.068,rs6983199,0.013  
8,119.080,rs4147528,0.013  
8,119.094,rs7832658,0.015  
8,119.156,rs2450219,0.023  
8,119.218,rs16890925,0.026  
8,119.223,rs2515062,0.026  
8,119.232,rs7832475,0.028  
8,119.253,rs12675551,0.034  
8,119.334,rs4876852,0.037  
8,119.345,rs12548521,0.037  
8,119.369,rs3936020,0.045  
8,119.373,rs10505343,0.045  
8,119.378,rs1829605,0.046  
8,119.421,rs2460968,0.072  
8,119.434,rs1521154,0.074  
8,119.476,rs7459445,0.068  
8,119.479,rs13438904,0.067  
8,119.517,rs10104977,0.063  
8,119.548,rs16891419,0.067  
8,119.746,rs1905786,0.085  
8,119.760,rs3102735,0.102  
8,119.859,rs16891916,0.081  
8,120.006,rs6469818,0.053  
8,120.015,rs9297594,0.064  
8,120.148,rs972393,0.063  
8,120.161,rs2927021,0.064  
8,120.229,rs11538929,0.068  
8,120.369,rs2305129,0.082  
8,120.466,rs6986529,0.092  
8,120.746,rs7843326,0.096  
8,120.996,rs6469890,0.106  
8,121.087,rs4871830,0.104  
8,121.184,rs7820004,0.103  
8,121.337,rs6989074,0.098  
8,121.377,rs2305607,0.114  
8,121.381,rs10111291,0.117  
8,121.384,rs7813088,0.119  
8,121.454,rs2034843,0.147  
8,121.620,rs11784372,0.182  
8,121.626,rs12155569,0.184  
8,121.653,rs3922897,0.189  
8,121.732,rs13258818,0.204  
8,121.771,rs7818703,0.200  
8,121.799,rs7841636,0.192  
8,121.857,rs10108016,0.184  
8,122.004,rs6990987,0.217  
8,122.012,rs10105297,0.216  
8,122.026,rs16894450,0.228  
8,122.044,rs7824584,0.239  
8,122.191,rs1275461,0.164  
8,122.371,rs7843884,0.066  
8,122.402,rs975037,0.063  
8,122.424,rs6415475,0.062  
8,122.557,rs1542682,0.050  
8,122.572,rs11986236,0.049  
8,122.641,rs1384184,0.054  
8,122.692,rs10089677,0.055  
8,122.719,rs1008786,0.075  
8,122.737,rs6982790,0.091  
8,122.825,rs279640,0.093



8,122.838,rs1030980,0.095  
8,122.960,rs1980018,0.134  
8,122.992,rs10282837,0.136  
8,122.995,rs6989617,0.137  
8,123.025,rs6651164,0.139  
8,123.074,rs16896565,0.136  
8,123.695,rs4492387,0.099  
8,123.742,rs16896983,0.099  
8,123.809,rs4397408,0.095  
8,123.902,rs7003395,0.089  
8,124.091,rs6990139,0.094  
8,124.140,rs4518674,0.077  
8,124.253,rs10505421,0.102  
8,124.272,rs4242336,0.108  
8,124.275,rs4368984,0.109  
8,124.280,rs7005211,0.110  
8,124.339,rs10091964,0.112  
8,124.393,rs12547950,0.117  
8,124.405,rs4871293,0.112  
8,124.432,rs2140330,0.102  
8,124.472,rs7836045,0.098  
8,124.489,rs876742,0.089  
8,124.526,rs7822857,0.098  
8,124.547,rs4291275,0.103  
8,124.592,rs6980880,0.203  
8,124.608,rs7009772,0.178  
8,124.617,rs11777048,0.181  
8,124.684,rs10505427,0.193  
8,124.847,rs13273011,0.196  
8,125.059,rs7002043,0.198  
8,125.077,rs7012131,0.198  
8,125.255,rs11776799,0.207  
8,125.455,rs4871323,0.274  
8,125.721,rs7812750,0.349  
8,125.784,rs4870831,0.323  
8,125.826,rs3802266,0.329  
8,125.895,rs12549382,0.357  
8,125.899,rs7812,0.359  
8,126.077,rs4871351,0.468  
8,126.085,rs13252935,0.473  
8,126.154,rs16898060,0.482  
8,126.298,rs13248008,0.490  
8,126.333,rs1713731,0.486  
8,126.478,rs16898247,0.472  
8,126.682,rs3824252,0.450  
8,126.726,rs12548263,0.475  
8,126.759,rs10089389,0.494  
8,126.775,rs2294088,0.502  
8,126.779,rs7000759,0.466  
8,126.808,rs2294090,0.472  
8,126.880,rs2385296,0.499  
8,126.883,rs10088524,0.540  
8,126.890,rs16898594,0.538  
8,126.934,rs6470161,0.539  
8,126.991,rs10956139,0.570  
8,127.051,rs10429365,0.562  
8,127.064,rs4242345,0.564  
8,127.099,rs1080109,0.645  
8,127.106,rs17257150,0.649  
8,127.111,rs11774189,0.647  
8,127.112,rs16898757,0.647

8,127.167,rs10956146,0.623  
8,127.243,rs2163534,0.650  
8,127.307,rs2001966,0.689  
8,127.321,rs9792207,0.702  
8,127.356,rs6470190,0.767  
8,127.364,rs4870870,0.874  
8,127.365,rs6470192,0.881  
8,127.485,rs12541518,0.770  
8,127.512,rs7842762,0.749  
8,127.515,rs4871440,0.749  
8,127.637,rs4301439,0.779  
8,127.646,rs7844981,0.777  
8,127.796,rs4870888,0.754  
8,127.868,rs4413755,0.732  
8,127.977,rs7818198,0.704  
8,128.023,rs4242365,0.698  
8,128.103,rs4457311,0.709  
8,128.118,rs10755924,0.667  
8,128.206,rs9886564,0.660  
8,128.371,rs4620270,0.702  
8,128.416,rs3812475,0.705  
8,128.660,rs4871506,0.719  
8,128.722,rs4871518,0.755  
8,128.768,rs4871529,0.819  
8,128.778,rs7813190,0.835  
8,128.796,rs4870916,0.847  
8,128.806,rs7831518,0.845  
8,128.833,rs2116081,0.879  
8,128.838,rs2382993,0.834  
8,128.849,rs2163372,0.899  
8,128.933,rs6993864,0.866  
8,128.936,rs7459793,0.863  
8,128.971,rs7011543,0.858  
8,129.043,rs4871549,0.842  
8,129.044,rs4871550,0.842  
8,129.178,rs6470302,0.884  
8,129.180,rs7016748,0.885  
8,129.293,rs2590665,0.921  
8,129.301,rs1834716,0.914  
8,129.316,rs2590673,0.903  
8,129.325,rs12545272,0.894  
8,129.330,rs7018326,0.890  
8,129.380,rs10099164,0.817  
8,129.402,rs4332153,0.839  
8,129.417,rs2385107,0.868  
8,129.422,rs2980872,0.867  
8,129.440,rs7837158,0.879  
8,129.457,rs10956245,0.887  
8,129.503,rs4518686,0.905  
8,129.599,rs12676771,0.884  
8,129.607,rs7824301,0.887  
8,129.716,rs1454616,0.949  
8,129.771,rs2124036,0.948  
8,129.801,rs12678366,0.909  
8,129.841,rs2054068,0.850  
8,129.943,rs3087723,0.819  
8,129.962,rs7008332,0.818  
8,129.992,rs7003960,0.823  
8,130.067,rs16900891,0.807  
8,130.220,rs2087688,0.783  
8,130.248,rs1491467,0.822

8,130.250,rs1491466,0.767  
8,130.317,rs6470399,0.698  
8,130.319,rs16901028,0.698  
8,130.325,rs1155228,0.695  
8,130.380,rs1552706,0.676  
8,130.579,rs6999393,0.631  
8,130.789,rs926127,0.651  
8,131.161,rs2467616,0.640  
8,131.267,rs16901313,0.637  
8,132.009,rs2293851,0.684  
8,132.278,rs4870976,0.698  
8,132.565,rs7012323,0.754  
8,132.625,rs2385694,0.723  
8,132.746,rs10481080,0.744  
8,132.766,rs7461025,0.746  
8,132.781,rs2385686,0.745  
8,132.792,rs4871724,0.747  
8,132.897,rs6470458,0.749  
8,132.952,rs2011629,0.756  
8,133.016,rs1906880,0.771  
8,133.247,rs10113595,0.820  
8,133.414,rs756100,0.843  
8,133.454,rs4871750,0.902  
8,133.903,rs961017,0.912  
8,133.947,rs2392729,0.960  
8,133.959,rs6993569,0.961  
8,134.032,rs16901966,0.965  
8,134.079,rs1456305,0.974  
8,134.248,rs2466024,1.014  
8,134.318,rs9643217,1.044  
8,134.361,rs10087719,1.064  
8,134.428,rs283741,1.073  
8,134.499,rs2122835,1.106  
8,134.578,rs283718,1.223  
8,134.588,rs283721,1.233  
8,134.685,rs672888,1.237  
8,134.810,rs731900,1.227  
8,134.846,rs7844673,1.276  
8,134.873,rs6983267,1.326  
8,134.996,rs7012462,1.412  
8,134.999,rs4871791,1.428  
8,135.034,rs7830412,1.591  
8,135.037,rs1447293,1.602  
8,135.077,rs9297758,1.629  
8,135.151,rs4871808,1.673  
8,135.249,rs13258742,1.647  
8,135.253,rs4407842,1.643  
8,135.330,rs4733739,1.458  
8,135.476,rs4314620,1.550  
8,135.512,rs6989963,1.522  
8,135.516,rs4130120,1.521  
8,135.564,rs4733616,1.488  
8,135.571,rs4562278,1.478  
8,135.632,rs4593503,1.579  
8,135.731,rs7845292,1.720  
8,135.742,rs7840975,1.724  
8,135.756,rs6470563,1.731  
8,135.796,rs9642880,1.722  
8,135.887,rs10505505,1.657  
8,136.038,rs6981913,1.536  
8,136.217,rs7841347,1.368

8,136.415,rs4339604,1.305  
8,136.516,rs6470588,1.295  
8,136.836,rs13274181,1.355  
8,136.897,rs752427,1.364  
8,137.033,rs10087240,1.356  
8,137.141,rs2173537,1.439  
8,137.191,rs2648868,1.485  
8,137.290,rs6470602,1.527  
8,137.311,rs2648902,1.520  
8,137.331,rs4733593,1.516  
8,137.764,rs16902760,1.527  
8,137.774,rs4733601,1.526  
8,137.778,rs13439100,1.524  
8,137.781,rs16902768,1.523  
8,137.831,rs2049824,1.469  
8,137.870,rs7820941,1.503  
8,137.879,rs4733859,1.510  
8,138.117,rs6998301,1.556  
8,138.155,rs10505517,1.609  
8,138.165,rs7831607,1.613  
8,138.167,rs16903010,1.615  
8,138.204,rs1516982,1.600  
8,138.343,rs4236736,1.499  
8,138.384,rs1432019,1.501  
8,138.478,rs4733653,1.591  
8,138.595,rs1470206,1.639  
8,138.774,rs7823113,1.709  
8,138.878,rs4480081,1.815  
8,138.948,rs6990827,1.933  
8,138.954,rs10098689,2.020  
8,139.011,rs2217589,2.061  
8,139.029,rs7815330,2.064  
8,139.164,rs10092988,2.128  
8,139.232,rs4397371,2.161  
8,139.233,rs16904143,2.161  
8,139.234,rs7007679,2.162  
8,139.238,rs17274130,2.239  
8,139.474,rs1600934,2.266  
8,139.483,rs4733741,2.267  
8,139.585,rs1825225,2.282  
8,139.723,rs1340022,2.460  
8,139.752,rs11775398,2.513  
8,139.768,rs1001812,2.516  
8,139.771,rs11781952,2.550  
8,139.772,rs9297810,2.561  
8,139.776,rs10505550,2.605  
8,139.777,rs7015138,2.615  
8,139.782,rs6983862,2.619  
8,139.783,rs6987139,2.620  
8,139.789,rs2959319,2.625  
8,139.815,rs10505551,2.619  
8,139.892,rs10098680,2.569  
8,139.956,rs4460390,2.502  
8,139.971,rs6986527,2.498  
8,140.092,rs9649963,2.624  
8,140.094,rs6470838,2.625  
8,140.232,rs10217074,2.517  
8,140.300,rs1509848,2.394  
8,140.303,rs6470848,2.388  
8,140.304,rs2572862,2.388  
8,140.401,rs17226545,2.427

8,140.525,rs448852,2.500  
8,140.595,rs1369450,2.517  
8,140.801,rs12156272,2.581  
8,140.931,rs1023095,2.518  
8,140.969,rs10505568,2.523  
8,141.164,rs10101663,2.494  
8,141.170,rs16904418,2.493  
8,141.181,rs4587308,2.484  
8,141.338,rs7017572,2.392  
8,141.363,rs4596632,2.364  
8,141.409,rs4371986,2.284  
8,141.435,rs1449471,2.231  
8,141.522,rs273403,2.153  
8,141.529,rs10505571,2.148  
8,141.533,rs10103391,2.146  
8,141.548,rs1605438,2.118  
8,141.577,rs457941,2.050  
8,141.634,rs277037,1.830  
8,141.674,rs1420484,1.805  
8,141.682,rs993718,1.799  
8,141.734,rs491614,1.741  
8,141.740,rs587639,1.736  
8,141.810,rs6980944,1.693  
8,141.889,rs1399362,1.640  
8,141.914,rs10100214,1.629  
8,141.968,rs10956624,1.614  
8,141.985,rs16904558,1.623  
8,142.071,rs2102103,1.673  
8,142.094,rs3802262,1.703  
8,142.098,rs3739280,1.708  
8,142.110,rs2280851,1.725  
8,142.139,rs2469643,1.760  
8,142.178,rs1864772,1.776  
8,142.601,rs9643288,1.711  
8,142.754,rs1025435,1.698  
8,142.903,rs4736413,1.554  
8,142.908,rs16904657,1.558  
8,142.975,rs2673567,1.640  
8,143.022,rs2673593,1.626  
8,143.034,rs1878016,1.675  
8,143.078,rs10100851,1.623  
8,143.095,rs2673579,1.616  
8,143.128,rs9297852,1.473  
8,143.157,rs13253244,1.545  
8,143.500,rs853326,1.563  
8,143.521,rs853308,1.603  
8,143.574,rs1879992,1.504  
8,143.629,rs3758113,1.466  
8,143.807,rs2252696,1.404  
8,144.779,rs4410884,1.250  
8,144.781,rs10956695,1.254  
8,144.829,rs4330674,1.471  
8,144.866,rs2929975,1.486  
8,144.877,rs2272646,1.483  
8,144.895,rs2233334,1.486  
8,144.903,rs7839335,1.484  
8,144.970,rs6982249,1.483  
8,145.024,rs11782647,1.451  
8,145.143,rs2737437,1.272  
8,145.161,rs6471124,1.256  
8,145.173,rs13274799,1.300

8,145.197,rs2142306,1.295  
8,145.215,rs16904929,1.302  
8,145.222,rs9643299,1.292  
8,145.252,rs3739256,1.131  
8,145.334,rs2978043,1.065  
8,145.480,rs7829120,0.961  
8,145.559,rs7820431,1.072  
8,145.638,rs1554324,1.002  
8,145.845,rs13264573,0.961  
8,146.435,rs2922446,0.877  
8,146.487,rs1610131,0.964  
8,146.489,rs2922485,0.967  
8,146.490,rs11780515,0.969  
8,146.497,rs2922464,0.981  
8,146.502,rs7814358,0.983  
8,146.504,rs4563869,1.026  
8,146.513,rs4897689,1.041  
8,146.514,rs924768,1.038  
8,146.519,rs4897697,1.019  
8,146.529,rs2896730,0.989  
8,146.532,rs1587768,0.970  
8,146.538,rs12676561,0.923  
8,146.559,rs1870126,0.977  
8,146.567,rs16905081,0.983  
8,146.584,rs6471199,0.964  
8,146.591,rs4897704,0.957  
8,146.593,rs1596953,0.937  
8,146.598,rs10098827,0.930  
8,146.603,rs10100237,0.888  
8,146.616,rs4897638,0.828  
8,146.625,rs7844624,0.806  
8,146.639,rs4076195,0.804  
8,146.647,rs6578149,0.806  
8,146.666,rs11990335,0.797  
8,146.669,rs12541381,0.798  
8,146.670,rs11166643,0.800  
8,146.673,rs17778003,0.800  
8,146.832,rs4388416,0.818  
8,146.930,rs1986890,0.804  
8,147.008,rs13275738,0.791  
8,147.017,rs7828209,0.834  
8,147.215,rs733122,0.855  
8,147.303,rs1000394,0.895  
8,147.355,rs4243894,0.907  
8,147.421,rs7462577,0.859  
8,147.434,rs7464953,0.846  
8,147.475,rs3925094,0.810  
8,147.481,rs11166907,0.811  
8,147.488,rs4909851,0.823  
8,147.538,rs6578047,0.892  
8,147.565,rs10113126,0.903  
8,147.571,rs6578068,0.915  
8,147.613,rs1383453,0.972  
8,147.788,rs2067766,0.993  
8,147.819,rs11167077,0.990  
8,147.831,rs10156288,0.964  
8,147.844,rs16905302,0.934  
8,147.882,rs7827633,0.906  
8,147.889,rs4909472,0.900  
8,147.924,rs2199922,0.890  
8,148.018,rs10464988,0.864

8,148.638,rs3935903,0.845  
8,148.643,rs3936125,0.819  
8,148.771,rs6577669,0.882  
8,148.810,rs11784836,0.904  
8,148.939,rs7840440,0.969  
8,149.065,rs6577727,1.026  
8,149.360,rs1371746,1.082  
8,149.398,rs1866698,1.043  
8,149.401,rs2255522,1.039  
8,149.475,rs7837030,1.042  
8,149.852,rs305230,1.022  
8,150.125,rs2582475,0.951  
8,150.129,rs2253765,1.013  
8,150.161,rs7842212,0.988  
8,150.228,rs1499446,0.981  
8,150.245,rs1499451,0.954  
8,150.321,rs6988964,0.970  
8,150.369,rs2978607,0.975  
8,150.382,rs4909633,0.971  
8,150.386,rs7012808,0.970  
8,150.397,rs4909356,0.970  
8,150.439,rs9324442,0.971  
8,150.524,rs4410940,0.978  
8,150.602,rs7820415,0.935  
8,150.650,rs13279979,0.908  
8,150.858,rs964944,0.872  
8,150.875,rs1399173,0.869  
8,151.138,rs17634990,0.858  
8,151.171,rs4620319,0.856  
8,151.314,rs4495466,0.893  
8,151.450,rs10112884,0.847  
8,151.477,rs4548215,0.840  
8,151.495,rs11787188,0.885  
8,151.533,rs7845645,0.911  
8,151.613,rs7386095,0.938  
8,151.706,rs2668096,0.938  
8,151.741,rs7003232,0.939  
8,151.748,rs2668109,0.938  
8,151.889,rs10103652,0.998  
8,151.962,rs11166774,1.057  
8,152.014,rs1325058,0.994  
8,152.042,rs10096264,0.995  
8,152.064,rs11786500,1.010  
8,152.090,rs7815520,1.028  
8,152.136,rs16908252,1.060  
8,152.137,rs7463648,1.060  
8,152.158,rs7828715,1.042  
8,152.226,rs7824771,1.013  
8,152.249,rs733518,1.012  
8,152.261,rs876369,1.020  
8,152.308,rs16908616,1.056  
8,152.311,rs6989502,1.056  
8,152.318,rs6577893,1.049  
8,152.333,rs16908658,1.045  
8,152.337,rs6577898,0.955  
8,152.349,rs872501,0.948  
8,152.350,rs4243888,0.942  
8,152.354,rs6577900,0.950  
8,152.366,rs1996030,1.029  
8,152.415,rs12545802,1.038  
8,152.426,rs1398297,1.020

8,152.442,rs7831210,0.994  
8,152.537,rs1512394,0.992  
8,152.703,rs2056277,1.044  
8,152.704,rs7837068,1.043  
8,152.773,rs1519391,1.090  
8,152.851,rs985679,1.124  
8,152.917,rs16909189,1.104  
8,152.972,rs6577927,1.107  
8,153.114,rs4909806,1.049  
8,153.227,rs7017524,1.000  
8,153.268,rs7832390,0.994  
8,153.515,rs4909443,0.940  
8,153.725,rs11166844,0.965  
8,153.735,rs4736183,0.919  
8,153.842,rs1879051,1.008  
8,153.941,rs2318331,1.065  
8,153.948,rs9644504,1.068  
8,153.969,rs12675384,1.073  
8,153.987,rs11775756,1.106  
8,154.015,rs6998323,1.124  
8,154.018,rs12549200,1.186  
8,154.102,rs6986041,1.202  
8,154.121,rs2318349,1.204  
8,154.232,rs11166865,1.175  
8,154.346,rs951920,1.086  
8,154.449,rs1395310,1.090  
8,154.571,rs16910093,1.089  
8,154.601,rs10875434,1.089  
8,154.763,rs7460675,1.110  
8,154.941,rs11775898,1.114  
8,155.032,rs7814156,1.223  
8,155.038,rs12675641,1.213  
8,155.045,rs2873902,1.191  
8,155.056,rs10216876,1.158  
8,155.075,rs7820230,1.144  
8,155.135,rs2319093,1.195  
8,155.214,rs994770,1.308  
8,155.257,rs7845540,1.320  
8,155.361,rs2467180,1.427  
8,155.579,rs2455790,1.478  
8,155.637,rs10108546,1.488  
8,155.799,rs2468708,1.510  
8,155.951,rs2261824,1.497  
8,156.017,rs2542425,1.484  
8,156.088,rs3780051,1.474  
8,156.186,rs3780032,1.538  
8,156.207,rs16911238,1.536  
8,156.521,rs2242181,1.443  
8,156.634,rs2054313,1.453  
8,156.700,rs2010771,1.469  
8,156.924,rs732803,1.363  
8,157.127,rs6578061,1.344  
8,157.272,rs6988625,1.296  
8,157.407,rs7006969,1.391  
8,157.603,rs6578080,1.318  
8,157.684,rs7002644,1.333  
8,157.706,rs7017431,1.335  
8,157.761,rs4236871,1.369  
8,157.768,rs4736167,1.370  
8,157.897,rs1568605,1.290  
8,157.972,rs7839705,1.291



8,158.026,rs13256219,1.317  
8,158.236,rs12681305,1.317  
8,158.240,rs7841423,1.313  
8,158.303,rs4961282,1.274  
8,158.366,rs11780595,1.233  
8,158.439,rs11595,1.174  
8,158.480,rs2977469,1.145  
8,158.602,rs7009635,1.150  
8,158.898,rs11785444,1.160  
8,158.902,rs4961287,1.159  
8,159.672,rs12545416,0.959  
8,159.679,rs11167021,0.955  
8,159.749,rs306974,0.921  
8,159.793,rs306967,0.899  
8,159.875,rs11167023,0.899  
8,159.935,rs11785437,0.889  
8,160.047,rs372758,0.873  
8,160.084,rs307739,0.867  
8,160.197,rs7018178,0.837  
8,160.358,rs6999890,0.833  
8,160.370,rs11786212,0.831  
8,160.400,rs7818687,0.826  
8,160.621,rs6578177,0.794  
8,160.807,rs7014345,0.743  
8,160.848,rs2748423,0.783  
8,160.908,rs4907333,0.841  
8,160.920,rs4907374,0.848  
8,160.922,rs6578201,0.848  
8,160.966,rs1566080,0.849  
8,161.035,rs537845,0.880  
8,161.055,rs13252791,0.888  
8,161.081,rs11779803,0.898  
8,161.208,rs7006068,0.913  
8,161.327,rs903956,0.842  
8,161.330,rs7844529,0.843  
8,161.346,rs6982668,0.847  
8,161.387,rs10092983,0.857  
8,161.390,rs7820007,0.856  
8,161.623,rs11167091,0.711  
8,161.651,rs9694100,0.742  
8,161.711,rs9720781,0.722  
8,161.726,rs9324568,0.666  
8,161.823,rs7013384,0.684  
8,161.854,rs7012875,0.688  
8,161.917,rs6583640,0.650  
8,162.061,rs733225,0.700  
8,162.123,rs4917217,0.733  
8,162.152,rs12676273,0.703  
8,162.164,rs1492366,0.711  
8,162.265,rs4244246,0.703  
8,162.314,rs7386204,0.790  
8,162.351,rs6981017,0.787  
8,162.361,rs7835207,0.725  
8,162.400,rs3934930,0.657  
8,162.440,rs6583595,0.619  
8,162.713,rs11167137,0.587  
8,162.913,rs6991885,0.559  
8,162.967,rs13275839,0.554  
8,163.007,rs6583634,0.550  
8,163.039,rs4074758,0.563  
8,163.125,rs7846567,0.579

8,163.266,rs9324593,0.635  
8,163.379,rs3802232,0.688  
8,163.626,rs11988843,0.743  
8,163.649,rs11783855,0.746  
8,163.690,rs2717591,0.762  
8,163.886,rs7844961,0.743  
8,164.068,rs4270938,0.652  
8,164.096,rs10283236,0.643  
8,164.172,rs12675829,0.636  
8,164.238,rs4977114,0.680  
8,164.250,rs4602864,0.690  
8,164.336,rs4075410,0.763  
8,164.352,rs7834727,0.769  
8,164.404,rs11781387,0.804  
8,164.445,rs7388577,0.787  
8,164.447,rs4075205,0.786  
8,164.572,rs2467894,0.681  
8,164.580,rs10866910,0.709  
8,164.635,rs4873792,0.661  
8,164.637,rs879740,0.657  
8,164.688,rs4874137,0.654  
8,164.725,rs896945,0.612  
8,164.822,rs2045084,0.534  
8,164.850,rs4873815,0.523  
8,164.908,rs10100154,0.512  
8,165.000,rs4875060,0.545  
8,165.031,rs11779128,0.565  
8,165.054,rs4977189,0.575  
8,165.064,rs11136331,0.574  
8,165.071,rs7831595,0.531  
8,165.346,rs9720889,0.512  
8,165.602,rs7016335,0.468  
8,165.671,rs3735840,0.427  
8,165.702,rs10108150,0.404  
8,165.818,rs11988651,0.410  
8,165.970,rs2953854,0.406  
8,166.132,rs3808375,0.408  
8,166.158,rs2979109,0.410  
9,0.050,rs7028675,0.747  
9,0.185,rs10815440,0.749  
9,0.262,rs2361111,0.752  
9,0.345,rs4740866,0.773  
9,0.421,rs10815596,0.788  
9,0.455,rs12005362,0.799  
9,0.537,rs10815670,0.823  
9,0.539,rs1853426,0.823  
9,0.581,rs10815704,0.825  
9,0.743,rs7029148,0.895  
9,0.808,rs7875857,0.939  
9,0.824,rs10977270,0.903  
9,0.849,rs16925374,0.934  
9,0.878,rs2057429,0.967  
9,0.958,rs10816063,1.016  
9,1.126,rs7871877,1.053  
9,1.160,rs7047346,1.056  
9,1.229,rs10756006,1.050  
9,1.280,rs2279988,1.055  
9,1.324,rs9140,1.059  
9,1.328,rs10809101,0.936  
9,1.369,rs17795247,0.970  
9,1.391,rs4497022,0.983

9,1.406,rs4741056,0.969  
9,1.434,rs1509186,0.934  
9,1.448,rs1355142,0.932  
9,1.521,rs10809367,0.917  
9,1.646,rs2375256,0.881  
9,1.660,rs10960072,0.875  
9,1.771,rs10809682,0.843  
9,1.800,rs10738265,0.824  
9,1.967,rs1415612,0.770  
9,2.053,rs16927344,0.737  
9,2.066,rs10809892,0.734  
9,2.082,rs7869745,0.776  
9,2.135,rs12345947,0.782  
9,2.179,rs1538721,0.803  
9,2.233,rs646785,0.834  
9,2.307,rs12341621,0.797  
9,2.410,rs880013,0.735  
9,2.412,rs876976,0.735  
9,2.452,rs7036822,0.729  
9,2.481,rs2210421,0.706  
9,2.557,rs7859959,0.693  
9,2.617,rs16930214,0.694  
9,2.630,rs10810330,0.694  
9,3.054,rs2181515,0.685  
9,3.099,rs1323235,0.684  
9,3.197,rs7038689,0.677  
9,3.264,rs6475120,0.669  
9,3.302,rs4297077,0.662  
9,3.453,rs3847228,0.633  
9,3.574,rs10810952,0.616  
9,3.707,rs4741619,0.607  
9,3.788,rs4551422,0.603  
9,3.890,rs7030343,0.630  
9,3.910,rs7857865,0.630  
9,4.029,rs10119055,0.804  
9,4.131,rs7862617,0.827  
9,4.152,rs3793482,0.840  
9,4.243,rs2066111,0.898  
9,4.348,rs1962292,0.921  
9,4.385,rs7866316,0.901  
9,4.426,rs13283799,0.839  
9,4.439,rs10811530,0.811  
9,4.475,rs17386332,0.795  
9,4.484,rs10965030,0.767  
9,4.491,rs3793504,0.782  
9,4.507,rs10491695,0.735  
9,4.592,rs10965167,0.660  
9,4.601,rs10965177,0.662  
9,4.685,rs10491703,0.606  
9,4.688,rs10491704,0.605  
9,4.718,rs4741657,0.589  
9,4.764,rs1555646,0.582  
9,4.821,rs7869041,0.625  
9,4.868,rs744216,0.596  
9,4.963,rs17473202,0.625  
9,5.076,rs2183810,0.653  
9,5.222,rs2376120,0.685  
9,5.257,rs7048743,0.682  
9,5.317,rs10757471,0.673  
9,5.329,rs10757474,0.678  
9,5.379,rs1331458,0.687

9,5.583,rs620949,0.706  
9,5.602,rs4741729,0.706  
9,5.638,rs1590979,0.706  
9,5.744,rs1454637,0.701  
9,5.814,rs1454626,0.701  
9,5.871,rs3780181,0.663  
9,5.894,rs6148,0.659  
9,5.950,rs1470943,0.645  
9,5.988,rs7870360,0.637  
9,6.018,rs10122587,0.632  
9,6.071,rs897165,0.623  
9,6.130,rs10967775,0.636  
9,6.169,rs10967908,0.653  
9,6.211,rs7854358,0.673  
9,6.219,rs10967974,0.675  
9,6.446,rs10116824,0.704  
9,6.475,rs12001239,0.681  
9,6.480,rs7026256,0.678  
9,6.515,rs10968653,0.642  
9,6.665,rs10813032,0.710  
9,6.746,rs4741798,0.720  
9,6.780,rs4543592,0.725  
9,6.847,rs2327717,0.710  
9,6.853,rs3847252,0.710  
9,6.899,rs7021672,0.708  
9,6.903,rs3843576,0.710  
9,6.980,rs1570286,0.732  
9,7.155,rs10511446,0.720  
9,7.226,rs2986676,0.721  
9,7.314,rs17659225,0.709  
9,7.497,rs7046581,0.706  
9,7.577,rs951777,0.714  
9,7.577,rs2488292,0.658  
9,7.592,rs1001389,0.696  
9,7.605,rs10814284,0.616  
9,7.685,rs1548299,0.699  
9,7.718,rs10511452,0.730  
9,7.725,rs10814428,0.742  
9,7.759,rs10511453,0.747  
9,7.767,rs7872019,0.768  
9,7.770,rs7871296,0.775  
9,7.798,rs10973251,0.800  
9,7.836,rs7868939,0.828  
9,7.873,rs7039314,0.840  
9,7.923,rs2380902,0.863  
9,7.934,rs2297324,0.842  
9,7.936,rs12376878,0.837  
9,7.939,rs12001442,0.832  
9,7.957,rs4612398,0.796  
9,7.962,rs12685627,0.793  
9,7.990,rs7867243,0.782  
9,7.994,rs6476722,0.782  
9,8.029,rs1869690,0.788  
9,8.097,rs10974235,0.780  
9,8.099,rs564618,0.760  
9,8.101,rs12238888,0.737  
9,8.101,rs11791772,0.773  
9,8.101,rs528938,0.785  
9,8.102,rs663542,0.751  
9,8.102,rs7045016,0.751  
9,8.102,rs12351382,0.752

9,8.102,rs657076,0.752  
9,8.106,rs515380,0.747  
9,8.106,rs501461,0.751  
9,8.109,rs10814835,0.718  
9,8.109,rs806031,0.728  
9,8.110,rs10814848,0.744  
9,9.017,rs10974343,0.625  
9,9.079,rs10758561,0.618  
9,9.093,rs10974362,0.616  
9,9.174,rs6476823,0.607  
9,9.192,rs13292114,0.604  
9,9.251,rs11999791,0.596  
9,9.257,rs911491,0.594  
9,9.402,rs10758590,0.531  
9,9.451,rs6476837,0.527  
9,9.495,rs10758594,0.523  
9,9.544,rs4740766,0.560  
9,9.559,rs10739044,0.559  
9,9.574,rs12336107,0.555  
9,9.604,rs10739046,0.551  
9,9.657,rs10758606,0.583  
9,9.670,rs10974470,0.590  
9,9.684,rs12378782,0.589  
9,9.895,rs2210105,0.605  
9,9.907,rs4741967,0.608  
9,10.015,rs10511457,0.639  
9,10.106,rs4741985,0.662  
9,10.478,rs10491733,0.764  
9,10.650,rs12351328,0.806  
9,10.709,rs7849913,0.818  
9,10.807,rs16921457,0.812  
9,10.807,rs10815016,0.812  
9,10.857,rs3780415,0.810  
9,10.946,rs3780412,0.754  
9,11.081,rs2771,0.814  
9,11.251,rs10974672,0.841  
9,11.315,rs10815051,0.848  
9,11.538,rs12685759,0.837  
9,11.579,rs1331191,0.833  
9,11.603,rs1048020,0.820  
9,11.747,rs378117,0.764  
9,11.839,rs385893,0.714  
9,11.858,rs420470,0.705  
9,11.959,rs4740801,0.672  
9,12.128,rs457417,0.635  
9,12.146,rs10974824,0.633  
9,12.154,rs10815099,0.645  
9,12.155,rs913259,0.646  
9,12.175,rs10815102,0.656  
9,12.230,rs1571221,0.709  
9,12.274,rs7870381,0.747  
9,12.549,rs10758677,0.704  
9,12.658,rs10975037,0.661  
9,12.676,rs10975041,0.659  
9,12.677,rs1407374,0.659  
9,12.727,rs1322220,0.651  
9,12.772,rs7027829,0.626  
9,12.799,rs1535453,0.631  
9,12.812,rs10491647,0.633  
9,12.832,rs822349,0.690  
9,12.854,rs10125854,0.699

9,12.855,rs2890658,0.699  
9,12.894,rs10975152,0.781  
9,12.916,rs16923201,0.796  
9,12.918,rs4237162,0.798  
9,12.951,rs7854413,0.762  
9,12.973,rs7025291,0.738  
9,12.973,rs7024586,0.737  
9,13.007,rs7037208,0.725  
9,13.127,rs10815274,0.812  
9,13.208,rs2797512,0.822  
9,13.268,rs1418742,0.827  
9,13.299,rs10975339,0.885  
9,13.299,rs7034210,0.885  
9,13.479,rs343494,0.899  
9,13.556,rs387149,0.886  
9,13.645,rs12551256,0.911  
9,13.881,rs524888,0.922  
9,13.979,rs4740848,1.012  
9,13.979,rs1929933,1.012  
9,13.993,rs7870809,1.003  
9,14.046,rs2118653,0.974  
9,14.082,rs10815461,1.033  
9,14.092,rs2918182,1.016  
9,14.102,rs7871969,1.009  
9,14.126,rs10739110,0.991  
9,14.214,rs4742263,0.950  
9,14.251,rs4740861,0.905  
9,14.290,rs4742269,0.887  
9,14.297,rs10118127,0.886  
9,14.455,rs6477122,0.848  
9,14.624,rs12342436,0.808  
9,14.720,rs702279,0.780  
9,14.785,rs1323398,0.801  
9,14.832,rs2792238,0.809  
9,14.937,rs10758821,0.844  
9,14.946,rs12554351,0.844  
9,14.947,rs16925141,0.845  
9,15.046,rs10976014,0.855  
9,15.157,rs10118608,0.863  
9,15.164,rs4742308,0.865  
9,15.312,rs2890741,0.904  
9,15.453,rs913588,0.877  
9,15.633,rs2820957,0.889  
9,15.718,rs12551734,0.948  
9,15.818,rs7034160,0.973  
9,15.938,rs12555938,0.985  
9,16.091,rs1926363,1.017  
9,16.103,rs1926359,1.017  
9,16.118,rs6477190,1.008  
9,16.120,rs6477191,1.014  
9,16.138,rs4742341,1.044  
9,16.167,rs943174,1.011  
9,16.211,rs1926410,0.968  
9,16.374,rs10124650,0.913  
9,16.415,rs10815617,0.909  
9,16.453,rs4329320,0.910  
9,16.468,rs4740890,0.910  
9,16.486,rs10511479,0.910  
9,16.554,rs2381635,0.921  
9,16.612,rs12376869,0.931  
9,16.614,rs4740897,0.931

9,16.670,rs4742380,0.941  
9,16.911,rs3124028,0.904  
9,17.190,rs9407382,1.099  
9,17.192,rs10758900,1.098  
9,17.200,rs4742408,1.151  
9,17.226,rs182753,1.052  
9,17.238,rs7035953,1.048  
9,17.251,rs10815682,1.177  
9,17.253,rs327754,1.184  
9,17.288,rs327759,1.252  
9,17.354,rs9299057,1.251  
9,17.551,rs4302898,1.289  
9,17.586,rs2890768,1.311  
9,17.609,rs1535480,1.323  
9,17.636,rs10815721,1.317  
9,17.668,rs1407467,1.257  
9,17.704,rs2025193,1.259  
9,17.865,rs10976758,1.265  
9,17.869,rs4742447,1.268  
9,17.923,rs10758936,1.295  
9,17.937,rs16927126,1.292  
9,18.022,rs13287364,1.271  
9,18.047,rs12237835,1.270  
9,18.099,rs7044355,1.279  
9,18.121,rs1538523,1.305  
9,18.179,rs1339287,1.224  
9,18.197,rs17550688,1.067  
9,18.197,rs7043322,1.066  
9,18.198,rs3842929,1.058  
9,18.232,rs10815806,1.105  
9,18.233,rs7048696,1.048  
9,18.237,rs10976889,0.992  
9,18.238,rs884540,0.992  
9,18.348,rs10114301,0.895  
9,18.363,rs1353983,0.889  
9,18.598,rs12348387,0.866  
9,18.601,rs4742502,0.865  
9,18.648,rs10977117,0.867  
9,18.652,rs1323588,0.867  
9,18.804,rs10977176,0.855  
9,18.928,rs12340105,0.850  
9,19.011,rs10758985,0.860  
9,19.238,rs1473822,0.809  
9,19.280,rs7038493,0.773  
9,19.349,rs9299072,0.713  
9,19.389,rs1550004,0.762  
9,19.424,rs10733549,0.741  
9,19.466,rs7048621,0.628  
9,19.519,rs751372,0.602  
9,19.527,rs10815977,0.602  
9,19.560,rs10759013,0.591  
9,19.567,rs17584499,0.595  
9,19.573,rs10815983,0.643  
9,19.601,rs2196066,0.617  
9,19.613,rs7856948,0.591  
9,19.647,rs10046838,0.526  
9,19.666,rs9644893,0.494  
9,19.786,rs12554851,0.519  
9,19.827,rs973117,0.526  
9,19.829,rs10816028,0.526  
9,19.835,rs12006331,0.527

9,19.883,rs540259,0.527  
9,19.893,rs368381,0.528  
9,19.917,rs324526,0.531  
9,19.924,rs324533,0.536  
9,19.955,rs324498,0.566  
9,20.031,rs472324,0.578  
9,20.113,rs10511521,0.704  
9,20.134,rs957155,0.737  
9,20.148,rs1999741,0.739  
9,20.219,rs1445213,0.756  
9,20.357,rs4568657,0.888  
9,20.394,rs7863177,0.899  
9,20.609,rs1855217,0.870  
9,20.639,rs2780078,0.877  
9,20.735,rs4342663,0.946  
9,20.775,rs1360593,0.957  
9,20.848,rs16929560,0.899  
9,20.892,rs4551426,0.897  
9,20.916,rs16929628,0.892  
9,21.016,rs17179053,0.866  
9,21.335,rs9657638,0.835  
9,21.386,rs4273904,0.818  
9,21.520,rs10977976,0.736  
9,21.539,rs2761735,0.722  
9,21.586,rs912356,0.687  
9,21.747,rs10978065,0.641  
9,21.771,rs10978074,0.625  
9,21.774,rs11999385,0.623  
9,21.785,rs10978080,0.570  
9,21.855,rs6477426,0.488  
9,21.856,rs16930657,0.488  
9,21.899,rs10491907,0.474  
9,21.914,rs7870939,0.469  
9,22.033,rs727756,0.470  
9,22.095,rs447910,0.471  
9,22.110,rs417403,0.474  
9,22.551,rs12164236,0.538  
9,22.571,rs1359095,0.543  
9,22.573,rs10959002,0.544  
9,22.727,rs7852334,0.636  
9,22.775,rs1535658,0.615  
9,22.783,rs6474539,0.617  
9,22.808,rs12006444,0.623  
9,22.971,rs7850565,0.649  
9,22.976,rs1537812,0.654  
9,22.985,rs12343415,0.657  
9,23.012,rs7870466,0.664  
9,23.032,rs833408,0.680  
9,23.102,rs833403,0.682  
9,23.193,rs7465708,0.629  
9,23.212,rs1322314,0.617  
9,23.259,rs2382220,0.600  
9,23.319,rs7040199,0.612  
9,23.353,rs4427223,0.578  
9,23.369,rs7029106,0.535  
9,23.378,rs10738180,0.537  
9,23.383,rs4113604,0.547  
9,23.386,rs7023148,0.547  
9,23.494,rs13283737,0.515  
9,23.688,rs2382245,0.489  
9,23.730,rs10511558,0.463



9,23.734,rs10809238,0.461  
9,23.818,rs7858983,0.455  
9,24.371,rs7044787,0.511  
9,24.547,rs1387292,0.527  
9,24.718,rs4483255,0.567  
9,24.852,rs10114729,0.551  
9,25.217,rs10732328,0.539  
9,25.231,rs12342107,0.540  
9,25.361,rs7037332,0.567  
9,25.369,rs10960403,0.571  
9,25.411,rs10809666,0.591  
9,25.416,rs12001461,0.595  
9,25.478,rs11789947,0.634  
9,25.504,rs7859230,0.703  
9,25.632,rs2066097,0.700  
9,25.678,rs946452,0.700  
9,25.726,rs17262250,0.697  
9,25.736,rs10283912,0.696  
9,25.812,rs7869172,0.600  
9,25.930,rs4740523,0.492  
9,25.949,rs10756373,0.478  
9,26.009,rs791681,0.534  
9,26.299,rs7855624,0.503  
9,26.312,rs7042370,0.501  
9,26.319,rs7029119,0.502  
9,26.383,rs483855,0.526  
9,26.430,rs6474741,0.505  
9,26.442,rs2183864,0.505  
9,26.470,rs1888859,0.520  
9,26.476,rs1412296,0.482  
9,26.494,rs10960847,0.499  
9,26.510,rs10809863,0.512  
9,26.617,rs1332071,0.479  
9,26.750,rs12351740,0.471  
9,26.772,rs10514822,0.472  
9,26.803,rs7029019,0.476  
9,26.866,rs999648,0.482  
9,27.001,rs11793993,0.465  
9,27.061,rs1811647,0.456  
9,27.066,rs10511579,0.455  
9,27.075,rs12341870,0.458  
9,27.169,rs1556577,0.494  
9,27.221,rs10961084,0.537  
9,27.234,rs1889297,0.548  
9,27.298,rs933034,0.560  
9,27.312,rs12004672,0.553  
9,27.392,rs7018881,0.509  
9,27.399,rs10961157,0.502  
9,27.430,rs12336782,0.489  
9,27.640,rs2382407,0.390  
9,27.689,rs10756497,0.390  
9,27.703,rs1034164,0.398  
9,27.748,rs7858704,0.466  
9,27.767,rs894822,0.446  
9,27.793,rs11788150,0.438  
9,27.829,rs10491766,0.418  
9,27.838,rs9407554,0.414  
9,27.948,rs1969938,0.373  
9,28.053,rs7048074,0.352  
9,28.111,rs12001724,0.389  
9,28.137,rs10961344,0.406

9,28.137,rs10961346,0.376  
9,28.139,rs10961347,0.385  
9,28.147,rs3920568,0.415  
9,28.159,rs10756524,0.414  
9,28.459,rs2382444,0.470  
9,28.493,rs1555553,0.470  
9,28.505,rs7027899,0.473  
9,28.648,rs1061820,0.487  
9,28.762,rs1033837,0.500  
9,29.138,rs10124289,0.517  
9,29.175,rs10810127,0.517  
9,29.188,rs17213362,0.530  
9,29.565,rs10961473,0.532  
9,29.586,rs2273933,0.527  
9,29.647,rs7874736,0.462  
9,30.112,rs10810132,0.294  
9,30.206,rs13295646,0.292  
9,30.223,rs598296,0.275  
9,30.250,rs877569,0.231  
9,30.260,rs10961483,0.222  
9,30.291,rs10756546,0.196  
9,30.299,rs471088,0.188  
9,30.306,rs10961490,0.180  
9,30.333,rs630973,0.158  
9,30.344,rs679613,0.150  
9,30.354,rs717932,0.162  
9,30.374,rs10481545,0.142  
9,30.500,rs1556032,0.160  
9,30.570,rs1323344,0.170  
9,30.687,rs873553,0.171  
9,30.701,rs927969,0.165  
9,30.740,rs10961560,0.157  
9,30.803,rs10491771,0.143  
9,30.856,rs7029906,0.138  
9,30.923,rs1343705,0.138  
9,31.055,rs6474850,0.170  
9,31.241,rs1048070,0.202  
9,31.255,rs8181217,0.214  
9,31.284,rs2890993,0.232  
9,31.289,rs2035987,0.232  
9,31.311,rs12685742,0.238  
9,31.312,rs16932272,0.238  
9,31.314,rs7039708,0.238  
9,31.395,rs12338615,0.249  
9,31.457,rs10810258,0.230  
9,31.520,rs16932386,0.215  
9,31.558,rs1996893,0.204  
9,31.561,rs10810285,0.201  
9,31.563,rs10961773,0.200  
9,31.572,rs7044651,0.197  
9,31.588,rs7034380,0.188  
9,31.715,rs10961817,0.160  
9,31.839,rs4445325,0.157  
9,31.880,rs10961870,0.156  
9,31.883,rs10738386,0.156  
9,31.890,rs4364728,0.191  
9,31.891,rs10961876,0.193  
9,31.934,rs7871542,0.247  
9,31.962,rs1780160,0.247  
9,31.969,rs1780157,0.216  
9,32.153,rs619105,0.205

9,32.184,rs10961940,0.192  
9,32.248,rs4741484,0.157  
9,32.288,rs682092,0.136  
9,32.311,rs10124733,0.131  
9,32.340,rs473315,0.114  
9,32.375,rs1105191,0.120  
9,32.622,rs7857933,0.075  
9,32.646,rs7871956,0.071  
9,33.450,rs3008731,0.052  
9,33.460,rs3008725,0.051  
9,33.541,rs2987089,0.047  
9,33.552,rs9298745,0.046  
9,33.562,rs12553725,0.046  
9,33.928,rs7044238,0.035  
9,33.981,rs7038757,0.034  
9,34.071,rs7875247,0.025  
9,34.088,rs2151065,0.025  
9,34.096,rs1571907,0.026  
9,34.176,rs1571906,0.040  
9,34.185,rs7857514,0.039  
9,34.304,rs1360549,0.037  
9,34.388,rs9407751,0.047  
9,34.499,rs12683609,0.059  
9,34.570,rs4961707,0.042  
9,34.596,rs6475044,0.036  
9,34.637,rs12000507,0.037  
9,34.840,rs717267,0.047  
9,34.896,rs7864652,0.054  
9,35.099,rs950359,0.091  
9,35.118,rs7039706,0.093  
9,35.312,rs11788776,0.091  
9,35.375,rs2153271,0.080  
9,35.412,rs10733325,0.092  
9,35.482,rs10962765,0.072  
9,35.505,rs953586,0.066  
9,35.518,rs1487509,0.065  
9,35.603,rs2492870,0.046  
9,36.056,rs4961441,0.048  
9,36.068,rs2593382,0.048  
9,36.072,rs2197152,0.047  
9,36.106,rs3780256,0.034  
9,36.107,rs2243877,0.034  
9,36.127,rs2593353,0.037  
9,36.197,rs1885170,0.023  
9,36.222,rs10810812,0.022  
9,36.260,rs3780247,0.033  
9,36.265,rs2208494,0.045  
9,36.271,rs2208496,0.046  
9,36.277,rs10963179,0.046  
9,36.362,rs12376522,0.026  
9,36.375,rs4302941,0.024  
9,36.437,rs6475184,0.015  
9,36.444,rs10963309,0.015  
9,36.454,rs10963315,0.014  
9,36.497,rs1755289,0.011  
9,36.571,rs1360235,0.007  
9,36.604,rs1329923,0.007  
9,36.632,rs4618799,0.006  
9,36.720,rs7038985,0.007  
9,36.735,rs7846812,0.005  
9,36.815,rs12002789,0.000

9,36.865,rs4436218,-0.000  
9,36.993,rs10810961,-0.001  
9,37.077,rs2153417,-0.002  
9,37.290,rs4961652,-0.005  
9,37.528,rs10119114,-0.008  
9,37.639,rs10963675,-0.010  
9,37.688,rs10811002,-0.017  
9,37.692,rs776755,-0.018  
9,37.730,rs776782,-0.014  
9,37.740,rs776776,-0.023  
9,37.758,rs702202,-0.086  
9,37.778,rs1332706,-0.094  
9,37.801,rs776761,-0.090  
9,37.938,rs576026,-0.063  
9,37.969,rs1332704,-0.060  
9,38.003,rs2164000,-0.064  
9,38.008,rs4246839,-0.068  
9,38.011,rs1978746,-0.071  
9,38.028,rs10118309,-0.085  
9,38.040,rs7869627,-0.084  
9,38.090,rs10963764,-0.078  
9,38.141,rs10963779,-0.075  
9,38.383,rs1327504,-0.063  
9,38.399,rs16937177,-0.059  
9,38.400,rs10117672,-0.058  
9,38.440,rs4977266,-0.049  
9,38.452,rs7871217,-0.031  
9,38.967,rs3824369,-0.031  
9,38.999,rs1982840,-0.016  
9,39.013,rs10963994,-0.015  
9,39.046,rs3004297,-0.019  
9,39.140,rs4977286,-0.030  
9,39.174,rs4262389,-0.030  
9,39.647,rs6475326,-0.017  
9,39.793,rs10964139,-0.026  
9,39.825,rs7045369,-0.032  
9,39.836,rs960908,-0.033  
9,39.854,rs12336251,-0.033  
9,39.872,rs10964160,-0.044  
9,39.904,rs7858547,-0.049  
9,40.006,rs4977303,-0.071  
9,40.025,rs3780218,-0.058  
9,40.206,rs10964234,-0.079  
9,40.220,rs2180939,-0.080  
9,40.235,rs2383113,-0.092  
9,40.272,rs7862478,-0.079  
9,40.276,rs12000690,-0.079  
9,40.398,rs6475366,-0.074  
9,40.438,rs1409955,-0.071  
9,40.543,rs4977334,-0.071  
9,40.600,rs7025940,-0.071  
9,40.615,rs2051134,-0.071  
9,40.642,rs10738554,-0.071  
9,40.852,rs7860695,-0.038  
9,40.869,rs10964396,-0.036  
9,40.985,rs10811316,-0.048  
9,41.075,rs4977246,-0.048  
9,41.130,rs7870612,-0.046  
9,41.137,rs869149,-0.045  
9,41.192,rs415026,-0.034  
9,41.303,rs1456961,-0.022

9,41.327,rs10811342,-0.021  
9,41.334,rs882123,-0.012  
9,41.399,rs224008,-0.001  
9,41.431,rs10757132,-0.002  
9,41.522,rs6475431,-0.000  
9,41.526,rs3934325,-0.000  
9,41.559,rs12682705,-0.000  
9,41.566,rs1537073,-0.000  
9,41.616,rs668703,0.002  
9,41.627,rs10811376,0.003  
9,41.632,rs2073854,0.003  
9,41.645,rs7851779,0.002  
9,41.686,rs10964665,0.002  
9,41.808,rs1986633,0.000  
9,41.894,rs4278230,0.001  
9,41.963,rs10757183,0.000  
9,41.967,rs4977959,0.001  
9,41.973,rs2032061,0.001  
9,41.999,rs7855438,-0.000  
9,42.004,rs10757193,-0.000  
9,42.173,rs4978113,-0.001  
9,42.183,rs7025006,-0.001  
9,42.222,rs2383192,-0.004  
9,42.278,rs991794,-0.002  
9,42.288,rs7033598,-0.003  
9,42.330,rs754819,-0.001  
9,42.360,rs13294794,-0.002  
9,42.392,rs11788139,-0.004  
9,42.449,rs1869203,-0.008  
9,42.450,rs1377195,-0.021  
9,42.749,rs7865829,-0.014  
9,42.797,rs7023329,-0.013  
9,42.892,rs3802393,-0.012  
9,43.111,rs4977750,-0.007  
9,43.122,rs10965197,-0.007  
9,43.210,rs3731217,-0.007  
9,43.432,rs7855162,-0.009  
9,43.440,rs1547705,-0.009  
9,43.445,rs4977574,-0.009  
9,43.480,rs4977761,-0.031  
9,43.481,rs2065501,-0.031  
9,43.483,rs2065504,-0.042  
9,43.536,rs2025796,-0.045  
9,43.540,rs1679014,-0.044  
9,43.654,rs1359741,-0.029  
9,43.764,rs7868400,-0.028  
9,43.838,rs4977586,-0.030  
9,43.899,rs1414696,-0.030  
9,44.162,rs1463006,-0.036  
9,44.177,rs2383246,-0.035  
9,44.189,rs10511719,-0.034  
9,44.203,rs10733382,-0.033  
9,44.222,rs10811812,-0.032  
9,44.256,rs7859974,-0.022  
9,44.283,rs2383251,-0.020  
9,44.304,rs10511715,-0.014  
9,44.337,rs10511712,-0.013  
9,44.359,rs7873939,-0.010  
9,44.398,rs10757399,-0.004  
9,44.413,rs10811872,-0.002  
9,44.478,rs7864583,-0.004

9,44.496,rs7047280,-0.004  
9,44.589,rs10811923,-0.005  
9,44.608,rs7873308,-0.000  
9,44.618,rs7030403,-0.000  
9,44.661,rs274932,-0.000  
9,44.662,rs10811933,-0.001  
9,44.699,rs156396,-0.003  
9,44.702,rs7865248,-0.004  
9,44.739,rs7852159,-0.019  
9,44.763,rs4977617,-0.027  
9,44.772,rs1041350,-0.027  
9,44.801,rs10966007,-0.026  
9,44.809,rs10757442,-0.026  
9,44.815,rs10448166,-0.026  
9,44.828,rs996793,-0.034  
9,44.832,rs2383268,-0.037  
9,44.835,rs10966021,-0.039  
9,44.853,rs1329024,-0.036  
9,44.864,rs4977887,-0.035  
9,44.869,rs16907652,-0.034  
9,44.881,rs3793577,-0.033  
9,44.926,rs1410846,-0.023  
9,44.945,rs3793595,-0.026  
9,44.962,rs12341793,-0.026  
9,44.964,rs10966093,-0.026  
9,45.002,rs12339691,-0.025  
9,45.013,rs1376141,-0.025  
9,45.021,rs515951,-0.025  
9,45.059,rs10966141,-0.028  
9,45.139,rs4615671,-0.038  
9,45.141,rs4548269,-0.038  
9,45.203,rs4977917,-0.042  
9,45.239,rs2298620,-0.052  
9,45.290,rs7871735,-0.049  
9,45.360,rs637658,-0.055  
9,45.419,rs829750,-0.060  
9,45.520,rs4618784,-0.071  
9,45.545,rs10812054,-0.073  
9,45.978,rs1332677,-0.078  
9,46.131,rs16908770,-0.083  
9,46.183,rs11998852,-0.085  
9,46.369,rs2038965,-0.090  
9,46.495,rs1318995,-0.068  
9,46.590,rs1461331,-0.090  
9,46.590,rs10812156,-0.090  
9,46.593,rs7046929,-0.091  
9,46.598,rs1563950,-0.092  
9,46.651,rs10966805,-0.033  
9,46.653,rs10812206,-0.044  
9,46.666,rs10757517,-0.048  
9,46.669,rs4977974,-0.047  
9,46.685,rs980462,-0.045  
9,46.708,rs7035858,-0.044  
9,47.151,rs1929973,-0.075  
9,47.297,rs4451410,-0.087  
9,47.351,rs10511761,-0.091  
9,47.373,rs7036435,-0.092  
9,47.423,rs10511762,-0.098  
9,47.490,rs7036161,-0.090  
9,47.507,rs4534200,-0.085  
9,47.603,rs1128953,-0.107

9,47.654,rs4461986,-0.074  
9,47.746,rs12005755,-0.063  
9,47.760,rs12352086,-0.061  
9,47.829,rs10491876,-0.056  
9,47.898,rs1220087,-0.056  
9,47.953,rs1220064,-0.050  
9,47.975,rs16909835,-0.052  
9,48.117,rs541805,-0.060  
9,48.224,rs1332340,-0.087  
9,48.261,rs9942876,-0.089  
9,48.354,rs957252,-0.097  
9,48.488,rs6475882,-0.124  
9,48.708,rs443014,-0.134  
9,48.721,rs514616,-0.134  
9,48.762,rs1336467,-0.136  
9,48.895,rs6475895,-0.145  
9,48.964,rs4111166,-0.147  
9,49.063,rs1998909,-0.186  
9,49.177,rs765888,-0.204  
9,49.183,rs1434478,-0.205  
9,49.240,rs1336336,-0.211  
9,49.283,rs10967566,-0.212  
9,49.370,rs12003612,-0.213  
9,49.474,rs16910953,-0.212  
9,49.543,rs621786,-0.214  
9,49.560,rs7042267,-0.165  
9,49.575,rs7034505,-0.163  
9,49.575,rs7035021,-0.163  
9,49.585,rs1413825,-0.163  
9,49.596,rs666478,-0.164  
9,49.610,rs581724,-0.164  
9,49.613,rs1334811,-0.144  
9,49.614,rs2224529,-0.135  
9,49.624,rs692946,-0.136  
9,49.802,rs1853186,-0.142  
9,49.933,rs2383722,-0.144  
9,50.058,rs10967882,-0.155  
9,50.140,rs1571649,-0.174  
9,50.166,rs10967901,-0.168  
9,50.218,rs12003803,-0.151  
9,50.237,rs1888380,-0.145  
9,50.302,rs1330921,-0.171  
9,50.320,rs4483251,-0.176  
9,50.342,rs10967916,-0.172  
9,50.597,rs1161680,-0.143  
9,50.625,rs4878454,-0.140  
9,50.732,rs725804,-0.129  
9,50.777,rs10511816,-0.128  
9,50.822,rs1822723,-0.152  
9,51.206,rs1565948,-0.175  
9,51.265,rs2282241,-0.177  
9,51.299,rs1982915,-0.177  
9,51.311,rs12002175,-0.179  
9,51.342,rs702231,-0.183  
9,51.445,rs2889829,-0.197  
9,51.509,rs536635,-0.181  
9,51.611,rs6476005,-0.118  
9,51.652,rs6476012,-0.123  
9,51.683,rs2026147,-0.122  
9,51.688,rs4242689,-0.116  
9,51.701,rs1857079,-0.109

9,51.736,rs10968093,-0.108  
9,51.737,rs1536982,-0.108  
9,51.892,rs1342095,-0.076  
9,51.904,rs11795165,-0.074  
9,51.938,rs2383733,-0.066  
9,51.988,rs10968179,-0.058  
9,52.105,rs10968239,-0.044  
9,52.114,rs10968246,-0.043  
9,52.118,rs1930003,-0.043  
9,52.207,rs1343457,-0.048  
9,52.232,rs1147819,-0.046  
9,52.240,rs10968314,-0.046  
9,52.260,rs7853840,-0.054  
9,52.263,rs7858580,-0.054  
9,52.273,rs7849984,-0.059  
9,52.417,rs2044961,-0.055  
9,52.443,rs1319535,-0.054  
9,52.486,rs12682967,-0.053  
9,52.509,rs10511827,-0.053  
9,52.511,rs4399024,-0.053  
9,52.559,rs7038123,-0.041  
9,52.565,rs4554572,-0.042  
9,52.681,rs6476056,-0.055  
9,52.701,rs1360507,-0.053  
9,52.760,rs10491894,-0.066  
9,52.769,rs944594,-0.068  
9,52.801,rs16912913,-0.052  
9,52.802,rs2150855,-0.051  
9,52.875,rs10757755,-0.050  
9,52.888,rs12003711,-0.048  
9,52.912,rs2383772,-0.046  
9,53.032,rs188904,-0.033  
9,53.041,rs10491623,-0.032  
9,53.107,rs7847094,-0.031  
9,53.123,rs2066346,-0.032  
9,53.143,rs10813050,-0.038  
9,53.146,rs2183831,-0.038  
9,53.169,rs7022573,-0.041  
9,53.172,rs4879352,-0.040  
9,53.175,rs10969197,-0.040  
9,53.229,rs560764,-0.032  
9,53.292,rs10813150,-0.025  
9,53.369,rs1932131,-0.011  
9,53.521,rs12345491,-0.018  
9,53.524,rs10969455,-0.018  
9,53.533,rs10813205,-0.017  
9,53.606,rs2248860,-0.007  
9,53.620,rs2813941,-0.008  
9,53.658,rs1780055,-0.010  
9,53.671,rs1510909,-0.009  
9,53.814,rs7024169,-0.020  
9,53.895,rs3866499,-0.027  
9,54.017,rs10969854,-0.033  
9,54.066,rs7863381,-0.032  
9,54.130,rs7049218,-0.033  
9,54.135,rs12000796,-0.033  
9,54.225,rs12344989,-0.023  
9,54.264,rs6476284,-0.009  
9,54.316,rs10813601,-0.009  
9,54.350,rs7034481,-0.008  
9,54.413,rs12552096,-0.005



9,54.457,rs10813645,-0.006  
9,54.463,rs780757,-0.006  
9,54.470,rs997609,-0.005  
9,54.481,rs10813650,-0.003  
9,54.646,rs10813743,-0.005  
9,54.657,rs10970789,-0.005  
9,54.660,rs10970796,-0.005  
9,54.666,rs7859572,-0.004  
9,54.671,rs906585,-0.004  
9,54.746,rs17285159,-0.000  
9,54.754,rs10970869,0.000  
9,54.757,rs1411872,0.000  
9,54.792,rs1331231,0.001  
9,54.811,rs10970923,0.000  
9,54.849,rs7047398,0.000  
9,54.858,rs7847742,0.000  
9,54.863,rs6476361,0.000  
9,54.889,rs7022554,-0.000  
9,55.013,rs540467,0.000  
9,55.025,rs10813840,-0.000  
9,55.068,rs2117523,-0.000  
9,55.103,rs4879604,-0.001  
9,55.116,rs960083,-0.003  
9,55.150,rs10971128,-0.002  
9,55.159,rs300629,-0.002  
9,55.226,rs1888871,-0.005  
9,55.255,rs12552198,-0.005  
9,55.395,rs10971412,-0.008  
9,55.404,rs4879666,-0.016  
9,55.420,rs7854765,-0.023  
9,55.447,rs855508,-0.027  
9,56.658,rs7871764,-0.033  
9,56.700,rs2275003,-0.043  
9,56.703,rs10971942,-0.043  
9,56.750,rs1041251,-0.031  
9,56.859,rs11788070,-0.040  
9,56.900,rs11793196,-0.041  
9,56.923,rs4395980,-0.042  
9,56.934,rs10758268,-0.042  
9,56.940,rs3763613,-0.033  
9,56.971,rs2070074,-0.043  
9,57.000,rs10972203,-0.043  
9,57.006,rs2297132,-0.043  
9,57.047,rs277558,-0.045  
9,57.062,rs924565,-0.046  
9,57.162,rs7048389,-0.050  
9,57.191,rs944700,-0.051  
9,57.206,rs4879869,-0.052  
9,57.277,rs10758303,-0.062  
9,57.431,rs4879913,-0.092  
9,57.443,rs1890592,-0.096  
9,57.449,rs2153240,-0.097  
9,57.461,rs2071675,-0.100  
9,57.474,rs4879926,-0.103  
9,57.511,rs7020142,-0.112  
9,57.537,rs10738948,-0.118  
9,57.571,rs2890719,-0.126  
9,57.572,rs2025175,-0.126  
9,57.585,rs10814300,-0.133  
9,57.595,rs7034414,-0.139  
9,57.613,rs1408466,-0.114

9,57.616,rs1324461,-0.114  
9,57.629,rs7863810,-0.114  
9,57.632,rs10814323,-0.113  
9,57.636,rs10972705,-0.114  
9,57.664,rs6476527,-0.116  
9,57.736,rs4878646,-0.143  
9,57.758,rs4879983,-0.142  
9,57.781,rs10814376,-0.143  
9,57.800,rs12553273,-0.146  
9,58.052,rs2094394,-0.186  
9,58.104,rs12379827,-0.171  
9,58.112,rs11792514,-0.169  
9,58.123,rs11794314,-0.167  
9,58.139,rs1887432,-0.182  
9,58.160,rs7857754,-0.162  
9,58.178,rs752358,-0.168  
9,58.217,rs1887438,-0.113  
9,58.364,rs10758401,-0.091  
9,58.479,rs1176844,-0.070  
9,58.522,rs2800266,-0.074  
9,58.744,rs7852051,-0.058  
9,58.815,rs10758407,-0.068  
9,58.990,rs3780138,-0.072  
9,59.053,rs11999298,-0.073  
9,59.236,rs3780151,-0.078  
9,59.247,rs10973133,-0.079  
9,59.256,rs4880042,-0.080  
9,59.263,rs1888016,-0.085  
9,59.288,rs4880048,-0.105  
9,59.313,rs2297106,-0.106  
9,59.595,rs10814520,-0.115  
9,59.617,rs765567,-0.113  
9,59.620,rs471579,-0.112  
9,59.634,rs1571231,-0.109  
9,59.646,rs2768659,-0.107  
9,59.693,rs913279,-0.087  
9,59.695,rs1571234,-0.087  
9,59.737,rs927930,-0.087  
9,59.754,rs7039920,-0.089  
9,59.778,rs4621903,-0.091  
9,59.838,rs1325916,-0.093  
9,59.857,rs13302352,-0.080  
9,59.859,rs13298495,-0.078  
9,59.880,rs2296553,-0.075  
9,59.932,rs4878174,-0.073  
9,60.062,rs776023,-0.058  
9,60.119,rs12345885,-0.049  
9,60.139,rs943936,-0.046  
9,60.189,rs1928233,-0.048  
9,60.261,rs12235873,-0.072  
9,60.269,rs10973694,-0.076  
9,60.287,rs2810729,-0.078  
9,60.309,rs1006087,-0.085  
9,60.316,rs2810723,-0.085  
9,60.323,rs4388534,-0.085  
9,60.344,rs4878190,-0.088  
9,60.352,rs1348335,-0.089  
9,60.355,rs10973734,-0.090  
9,60.366,rs341466,-0.090  
9,60.385,rs10814680,-0.081  
9,60.396,rs4878795,-0.060

9,60.401,rs1555480,-0.052  
9,60.404,rs4242647,-0.052  
9,60.406,rs2073478,-0.052  
9,60.411,rs11791018,-0.051  
9,60.412,rs4878811,-0.051  
9,60.428,rs4480202,-0.048  
9,60.436,rs4394481,-0.045  
9,60.490,rs2993129,-0.012  
9,60.526,rs10973948,-0.020  
9,60.530,rs945844,-0.022  
9,60.535,rs10758513,-0.034  
9,60.536,rs16931666,-0.034  
9,60.536,rs9407070,-0.035  
9,60.547,rs7039377,-0.034  
9,60.552,rs4593645,-0.028  
9,60.559,rs10973981,-0.021  
9,60.567,rs10511953,-0.025  
9,60.568,rs7848575,-0.024  
9,60.576,rs10758522,-0.019  
9,60.578,rs10974006,-0.018  
9,60.595,rs7037234,-0.021  
9,60.760,rs4961901,-0.033  
9,63.671,rs6606438,-0.016  
9,65.909,rs449851,-0.015  
9,65.965,rs10868795,-0.018  
9,66.084,rs11142838,-0.026  
9,66.113,rs4143074,-0.028  
9,66.134,rs2183738,-0.026  
9,66.156,rs7851511,-0.022  
9,66.183,rs12004348,-0.016  
9,66.240,rs1107108,-0.021  
9,66.268,rs4745231,-0.015  
9,66.278,rs7866673,-0.013  
9,66.436,rs7855908,-0.022  
9,66.541,rs10781306,-0.028  
9,66.560,rs4745466,-0.029  
9,66.573,rs883751,-0.030  
9,66.578,rs2871223,-0.030  
9,66.685,rs9314854,-0.041  
9,66.742,rs7870657,-0.035  
9,66.779,rs955792,-0.030  
9,66.780,rs2275431,-0.030  
9,66.783,rs3750551,-0.030  
9,66.792,rs17063341,-0.035  
9,66.809,rs7861316,-0.037  
9,66.819,rs7033674,-0.036  
9,66.841,rs12001157,-0.039  
9,66.853,rs1412243,-0.038  
9,66.860,rs1970017,-0.037  
9,66.874,rs1576508,-0.031  
9,66.874,rs13288998,-0.031  
9,66.877,rs975645,-0.030  
9,66.880,rs7851932,-0.028  
9,66.889,rs10867879,-0.014  
9,66.911,rs1536993,-0.010  
9,66.918,rs10511972,-0.011  
9,66.921,rs10511973,-0.012  
9,66.927,rs10217478,-0.012  
9,66.944,rs4446788,-0.008  
9,66.963,rs10521438,-0.010  
9,66.980,rs10125617,-0.011

9,67.078,rs4745013,-0.020  
9,67.091,rs7029925,-0.020  
9,67.150,rs1889915,-0.018  
9,67.180,rs17458750,-0.018  
9,67.263,rs4465028,-0.014  
9,67.345,rs4745035,-0.008  
9,67.360,rs1831143,-0.012  
9,67.431,rs552849,-0.039  
9,67.473,rs17056295,-0.041  
9,67.507,rs1888076,-0.043  
9,67.675,rs10781009,-0.052  
9,67.713,rs1566837,-0.052  
9,67.722,rs1021879,-0.060  
9,67.738,rs10781013,-0.062  
9,67.744,rs11792896,-0.058  
9,67.844,rs1891301,-0.049  
9,67.899,rs4745087,-0.044  
9,68.016,rs2309974,-0.036  
9,68.080,rs11142904,-0.035  
9,68.133,rs868147,-0.030  
9,68.210,rs4745114,-0.016  
9,68.211,rs2297089,-0.016  
9,68.239,rs3739781,-0.012  
9,68.359,rs7030498,-0.004  
9,68.363,rs11787649,-0.001  
9,68.382,rs7039742,0.001  
9,68.411,rs10781076,0.009  
9,68.424,rs10869142,0.009  
9,68.437,rs10869149,0.010  
9,68.465,rs10746908,0.008  
9,68.472,rs13439944,0.008  
9,68.558,rs7853366,0.003  
9,68.659,rs11999628,0.001  
9,68.664,rs348472,0.001  
9,68.668,rs8187950,0.001  
9,68.695,rs1582620,0.000  
9,68.715,rs10869215,-0.002  
9,68.730,rs2310329,-0.004  
9,68.743,rs11143503,-0.006  
9,68.745,rs2795108,-0.006  
9,68.750,rs1342018,-0.002  
9,68.755,rs4256646,-0.002  
9,69.151,rs278729,-0.006  
9,69.207,rs157109,-0.006  
9,69.215,rs2492825,-0.007  
9,69.246,rs1505518,-0.006  
9,69.284,rs156772,-0.007  
9,69.293,rs1505517,-0.007  
9,69.461,rs1116198,-0.009  
9,69.941,rs3012844,-0.011  
9,70.022,rs10781187,-0.011  
9,70.104,rs10746936,-0.012  
9,70.106,rs966266,-0.012  
9,70.286,rs11143894,-0.011  
9,70.346,rs12002539,-0.014  
9,70.370,rs4255204,-0.016  
9,70.509,rs915291,-0.032  
9,70.648,rs7870498,-0.033  
9,70.743,rs7032677,-0.035  
9,70.760,rs1319551,-0.034  
9,70.762,rs12352112,-0.033

9,70.763,rs10869433,-0.033  
9,70.856,rs519067,-0.029  
9,70.987,rs6560408,-0.054  
9,71.001,rs11144085,-0.058  
9,71.024,rs7848706,-0.059  
9,71.122,rs12378991,-0.064  
9,71.129,rs6560417,-0.065  
9,71.177,rs1333343,-0.059  
9,71.203,rs2800249,-0.055  
9,71.238,rs1359879,-0.055  
9,71.396,rs11144184,-0.052  
9,71.497,rs911737,-0.050  
9,71.519,rs4442208,-0.052  
9,71.619,rs7872448,-0.059  
9,71.620,rs10869509,-0.059  
9,71.631,rs2273770,-0.061  
9,71.642,rs2146044,-0.060  
9,71.680,rs1081877,-0.057  
9,71.738,rs10124785,-0.082  
9,71.800,rs7032088,-0.072  
9,71.806,rs2095057,-0.071  
9,71.809,rs10869533,-0.071  
9,72.054,rs1409937,-0.046  
9,72.104,rs7019425,-0.045  
9,72.172,rs13287590,-0.045  
9,72.186,rs1327371,-0.045  
9,72.192,rs13301187,-0.058  
9,72.192,rs9314833,-0.059  
9,72.300,rs1327369,-0.086  
9,72.349,rs1591079,-0.086  
9,72.456,rs4451372,-0.084  
9,72.587,rs10118286,-0.074  
9,72.603,rs11144511,-0.091  
9,72.631,rs11144516,-0.101  
9,72.751,rs1927986,-0.124  
9,72.785,rs943863,-0.129  
9,72.806,rs7866089,-0.131  
9,72.947,rs487502,-0.125  
9,72.959,rs2479843,-0.126  
9,73.126,rs4745444,-0.131  
9,73.341,rs1934737,-0.116  
9,73.374,rs7862766,-0.119  
9,73.415,rs4745464,-0.128  
9,73.465,rs12115679,-0.149  
9,73.510,rs2377426,-0.162  
9,73.600,rs10781320,-0.194  
9,73.756,rs12000040,-0.206  
9,73.911,rs10781324,-0.190  
9,73.997,rs11144723,-0.170  
9,74.028,rs1029040,-0.168  
9,74.031,rs1023181,-0.168  
9,74.074,rs11144728,-0.171  
9,74.163,rs1258094,-0.201  
9,74.178,rs1475615,-0.130  
9,74.207,rs2297343,-0.110  
9,74.226,rs1339236,-0.108  
9,74.244,rs4745511,-0.125  
9,74.256,rs1888705,-0.125  
9,74.261,rs1331386,-0.124  
9,74.270,rs2377527,-0.124  
9,74.275,rs2270570,-0.125

9,74.288,rs966097,-0.130  
9,74.293,rs10746995,-0.136  
9,74.336,rs2261557,-0.178  
9,74.342,rs1002420,-0.171  
9,74.350,rs2643322,-0.158  
9,74.391,rs7026142,-0.156  
9,74.396,rs680448,-0.158  
9,74.483,rs1886268,-0.155  
9,74.576,rs7043420,-0.176  
9,74.611,rs2149589,-0.188  
9,74.724,rs700809,-0.178  
9,74.807,rs7859873,-0.169  
9,74.847,rs666721,-0.165  
9,75.102,rs2225245,-0.163  
9,75.176,rs7861307,-0.166  
9,75.195,rs3924629,-0.168  
9,75.211,rs10781380,-0.170  
9,75.320,rs10869832,-0.164  
9,75.342,rs7853555,-0.144  
9,75.383,rs1361856,-0.161  
9,75.397,rs12238848,-0.134  
9,75.478,rs1125469,-0.124  
9,75.511,rs7031918,-0.131  
9,75.588,rs10121560,-0.154  
9,75.656,rs10217550,-0.172  
9,75.695,rs2183770,-0.208  
9,75.788,rs7853173,-0.184  
9,75.827,rs7044545,-0.182  
9,75.848,rs11145238,-0.185  
9,75.869,rs11145269,-0.189  
9,75.882,rs4361823,-0.189  
9,76.108,rs7034531,-0.225  
9,76.137,rs17063627,-0.249  
9,76.140,rs2296781,-0.252  
9,76.157,rs4745639,-0.290  
9,76.164,rs1547190,-0.294  
9,76.173,rs994362,-0.272  
9,76.210,rs636562,-0.236  
9,76.236,rs10869945,-0.165  
9,76.236,rs7035476,-0.164  
9,76.261,rs1162211,-0.149  
9,76.276,rs1953330,-0.140  
9,76.288,rs13288161,-0.092  
9,76.406,rs1328531,-0.081  
9,76.458,rs10869977,-0.076  
9,76.459,rs17786782,-0.076  
9,76.774,rs17787781,-0.109  
9,76.815,rs10116267,-0.114  
9,76.921,rs12376992,-0.128  
9,76.946,rs7855727,-0.149  
9,76.955,rs2998680,-0.153  
9,76.971,rs3849862,-0.159  
9,77.003,rs1566977,-0.165  
9,77.009,rs1505618,-0.167  
9,77.027,rs9695134,-0.174  
9,77.078,rs2106804,-0.209  
9,77.128,rs1757947,-0.220  
9,77.168,rs10867255,-0.245  
9,77.178,rs6559406,-0.255  
9,77.192,rs10867271,-0.283  
9,77.202,rs4300072,-0.280

9,77.226,rs7867205,-0.280  
9,77.376,rs11788493,-0.315  
9,77.405,rs6559443,-0.314  
9,77.568,rs11138085,-0.335  
9,77.584,rs1873738,-0.334  
9,77.600,rs4877475,-0.342  
9,77.627,rs273432,-0.352  
9,77.631,rs12351466,-0.353  
9,77.633,rs273473,-0.358  
9,77.652,rs11138141,-0.460  
9,77.662,rs4877483,-0.497  
9,77.670,rs7021045,-0.505  
9,77.684,rs11138168,-0.514  
9,77.699,rs10867379,-0.508  
9,77.709,rs9410806,-0.498  
9,77.778,rs10491794,-0.515  
9,77.812,rs11138303,-0.529  
9,77.859,rs4877146,-0.535  
9,77.913,rs10867418,-0.492  
9,77.993,rs7858020,-0.474  
9,78.001,rs4877153,-0.466  
9,78.004,rs7039360,-0.462  
9,78.009,rs3894377,-0.420  
9,78.060,rs10867444,-0.370  
9,78.084,rs913757,-0.419  
9,78.087,rs11138436,-0.422  
9,78.127,rs1328430,-0.483  
9,78.165,rs1887722,-0.473  
9,78.209,rs10114675,-0.483  
9,78.209,rs7044051,-0.483  
9,78.373,rs10867485,-0.467  
9,78.514,rs915004,-0.448  
9,78.631,rs928537,-0.429  
9,78.840,rs1857469,-0.406  
9,78.852,rs7860480,-0.405  
9,78.900,rs1550051,-0.399  
9,78.916,rs11138689,-0.398  
9,78.926,rs10119230,-0.398  
9,79.211,rs1410542,-0.361  
9,79.730,rs10735555,-0.319  
9,79.792,rs12002342,-0.318  
9,79.906,rs10491942,-0.335  
9,79.953,rs10780472,-0.342  
9,80.003,rs2378554,-0.338  
9,80.025,rs1572003,-0.334  
9,80.080,rs4390020,-0.364  
9,80.126,rs2777674,-0.371  
9,80.144,rs10115607,-0.375  
9,80.175,rs7869606,-0.381  
9,80.305,rs7869726,-0.411  
9,80.308,rs10780513,-0.410  
9,80.386,rs584846,-0.388  
9,80.422,rs4877214,-0.370  
9,80.438,rs11139315,-0.379  
9,80.450,rs10481754,-0.397  
9,80.456,rs911639,-0.405  
9,80.464,rs7039820,-0.407  
9,80.469,rs10867778,-0.403  
9,80.478,rs10867781,-0.399  
9,80.486,rs7856583,-0.401  
9,80.489,rs1342478,-0.398

9,80.493,rs3814532,-0.345  
9,80.500,rs4877669,-0.333  
9,80.521,rs3739581,-0.308  
9,80.555,rs7023749,-0.273  
9,80.585,rs12377016,-0.242  
9,80.596,rs1010745,-0.235  
9,80.600,rs637736,-0.232  
9,80.613,rs609658,-0.225  
9,80.614,rs7030006,-0.224  
9,80.621,rs669223,-0.258  
9,80.637,rs10121323,-0.253  
9,80.650,rs478787,-0.247  
9,80.651,rs11139442,-0.248  
9,80.654,rs4999155,-0.255  
9,80.662,rs7024973,-0.271  
9,80.728,rs2184427,-0.277  
9,80.921,rs4877228,-0.291  
9,81.058,rs7049209,-0.319  
9,81.154,rs10867852,-0.351  
9,81.239,rs7031058,-0.365  
9,81.400,rs493701,-0.381  
9,81.411,rs12236312,-0.422  
9,81.504,rs932638,-0.465  
9,81.513,rs11788842,-0.457  
9,81.562,rs2378645,-0.413  
9,81.577,rs4877240,-0.420  
9,81.605,rs2208622,-0.431  
9,81.617,rs10491542,-0.431  
9,81.736,rs7860062,-0.429  
9,81.830,rs10867921,-0.444  
9,82.003,rs11795101,-0.470  
9,82.037,rs11139921,-0.465  
9,82.096,rs4322086,-0.485  
9,82.112,rs11139944,-0.488  
9,82.124,rs10867947,-0.508  
9,82.127,rs7046769,-0.520  
9,82.130,rs10115371,-0.532  
9,82.154,rs12335503,-0.571  
9,82.187,rs11139984,-0.589  
9,82.229,rs10867967,-0.615  
9,82.257,rs10867970,-0.627  
9,82.305,rs10867985,-0.646  
9,82.310,rs10123088,-0.648  
9,82.331,rs10867992,-0.655  
9,82.346,rs2889243,-0.658  
9,82.346,rs4242620,-0.658  
9,82.479,rs4877761,-0.706  
9,82.486,rs3860922,-0.792  
9,82.575,rs3860941,-0.797  
9,82.659,rs13289150,-0.815  
9,82.680,rs7025704,-0.835  
9,82.736,rs10113885,-0.835  
9,82.764,rs2780980,-0.839  
9,83.219,rs4298563,-0.810  
9,83.344,rs4877815,-0.827  
9,83.410,rs973460,-0.812  
9,83.433,rs1898321,-0.794  
9,83.460,rs4471123,-0.767  
9,83.461,rs11140361,-0.767  
9,83.522,rs2118169,-0.716  
9,83.537,rs10512144,-0.704



9,83.546,rs1246267,-0.703  
9,83.655,rs4877822,-0.693  
9,83.780,rs17087049,-0.707  
9,83.790,rs10868142,-0.708  
9,83.814,rs11140525,-0.704  
9,83.827,rs17343066,-0.750  
9,83.850,rs12348550,-0.767  
9,83.894,rs11140555,-0.797  
9,83.915,rs12004770,-0.792  
9,84.031,rs7875211,-0.753  
9,84.056,rs11140629,-0.757  
9,84.060,rs1409706,-0.757  
9,84.106,rs7026337,-0.759  
9,84.482,rs11140831,-0.747  
9,84.718,rs615189,-0.685  
9,84.902,rs620420,-0.587  
9,84.924,rs329206,-0.564  
9,85.084,rs895606,-0.450  
9,85.096,rs2841455,-0.446  
9,85.138,rs11140976,-0.453  
9,85.163,rs7042753,-0.539  
9,85.171,rs9314742,-0.510  
9,85.175,rs10512168,-0.471  
9,85.176,rs4588941,-0.456  
9,85.180,rs3860946,-0.476  
9,85.404,rs4877947,-0.500  
9,86.010,rs7039482,-0.551  
9,86.065,rs10512169,-0.557  
9,86.465,rs957617,-0.570  
9,86.493,rs4338185,-0.565  
9,86.610,rs12378988,-0.544  
9,86.798,rs7036724,-0.495  
9,86.846,rs4484780,-0.484  
9,87.037,rs791323,-0.437  
9,87.165,rs353807,-0.387  
9,87.174,rs17051878,-0.386  
9,87.183,rs1331844,-0.422  
9,87.224,rs189544,-0.415  
9,87.256,rs353834,-0.417  
9,87.401,rs11792704,-0.414  
9,87.437,rs962704,-0.424  
9,87.447,rs913357,-0.390  
9,87.459,rs7026807,-0.392  
9,87.553,rs11141456,-0.415  
9,87.577,rs4492454,-0.413  
9,87.594,rs1331453,-0.415  
9,87.638,rs2183730,-0.421  
9,87.668,rs6559946,-0.420  
9,87.784,rs7864375,-0.341  
9,87.792,rs932858,-0.372  
9,87.928,rs374503,-0.368  
9,87.989,rs7021048,-0.366  
9,88.044,rs1169848,-0.370  
9,88.056,rs10868499,-0.371  
9,88.183,rs7036455,-0.398  
9,88.250,rs10448319,-0.404  
9,88.315,rs17052425,-0.413  
9,88.335,rs12553476,-0.415  
9,88.663,rs277714,-0.449  
9,88.699,rs12336476,-0.461  
9,88.932,rs10780825,-0.546

9,88.957,rs4878060,-0.525  
9,88.980,rs10868564,-0.502  
9,89.079,rs4878075,-0.525  
9,89.143,rs10868585,-0.544  
9,89.255,rs3758308,-0.550  
9,89.308,rs871495,-0.488  
9,89.323,rs10512186,-0.494  
9,89.351,rs7036598,-0.503  
9,89.440,rs1473180,-0.620  
9,89.459,rs3739784,-0.644  
9,89.463,rs3124237,-0.649  
9,89.464,rs7027958,-0.650  
9,89.477,rs1015477,-0.653  
9,89.491,rs7869944,-0.648  
9,89.518,rs3124238,-0.678  
9,89.541,rs1927976,-0.651  
9,89.593,rs4878117,-0.577  
9,89.617,rs3128479,-0.547  
9,89.727,rs7870268,-0.563  
9,89.748,rs17053425,-0.572  
9,89.750,rs10780872,-0.573  
9,89.869,rs6420260,-0.581  
9,89.997,rs10780878,-0.599  
9,90.001,rs12346877,-0.601  
9,90.168,rs560019,-0.644  
9,90.170,rs2271992,-0.644  
9,90.325,rs7871733,-0.654  
9,90.343,rs538970,-0.653  
9,90.398,rs4877394,-0.668  
9,90.433,rs11142112,-0.683  
9,90.434,rs12237927,-0.682  
9,90.668,rs10780907,-0.615  
9,90.761,rs4877434,-0.600  
9,90.762,rs4877435,-0.600  
9,90.769,rs4877132,-0.606  
9,90.812,rs7865913,-0.646  
9,91.496,rs4877455,-0.665  
9,91.598,rs4877464,-0.713  
9,91.945,rs17080818,-0.761  
9,92.083,rs1857496,-0.800  
9,92.147,rs7048152,-0.796  
9,92.406,rs2174057,-0.751  
9,92.689,rs7019570,-0.682  
9,92.765,rs9410427,-0.664  
9,92.866,rs11137472,-0.647  
9,92.923,rs6559331,-0.632  
9,92.978,rs2150611,-0.625  
9,92.986,rs944482,-0.626  
9,93.168,rs9410453,-0.621  
9,93.689,rs4877062,-0.527  
9,94.080,rs11137559,-0.488  
9,94.117,rs4074459,-0.535  
9,94.128,rs4073713,-0.543  
9,94.169,rs10908892,-0.577  
9,94.173,rs1571534,-0.580  
9,94.176,rs11265783,-0.579  
9,94.240,rs1571536,-0.516  
9,94.254,rs7872758,-0.519  
9,94.263,rs10908907,-0.520  
9,94.285,rs4876993,-0.528  
9,94.298,rs10120215,-0.482

9,94.305,rs4242594,-0.429  
9,94.399,rs9722251,-0.405  
9,94.427,rs10116554,-0.423  
9,94.441,rs9777581,-0.373  
9,94.577,rs4744157,-0.464  
9,94.598,rs10821475,-0.470  
9,94.641,rs10991799,-0.462  
9,94.675,rs7874990,-0.468  
9,94.675,rs12115490,-0.471  
9,94.686,rs16906203,-0.537  
9,94.686,rs1854444,-0.589  
9,94.686,rs1329047,-0.587  
9,94.689,rs4744106,-0.568  
9,94.700,rs964912,-0.531  
9,94.829,rs2380292,-0.555  
9,94.890,rs1777045,-0.588  
9,95.074,rs10761389,-0.636  
9,95.126,rs7341780,-0.651  
9,95.199,rs2613339,-0.672  
9,95.233,rs1017753,-0.657  
9,95.257,rs4744473,-0.655  
9,95.301,rs1173104,-0.653  
9,95.384,rs290267,-0.556  
9,95.398,rs3789889,-0.573  
9,95.409,rs914925,-0.600  
9,95.429,rs4744514,-0.619  
9,95.438,rs1760125,-0.627  
9,95.441,rs4744516,-0.627  
9,95.446,rs7864625,-0.620  
9,95.448,rs10512202,-0.618  
9,95.462,rs1172665,-0.603  
9,95.466,rs10512203,-0.599  
9,95.468,rs10993751,-0.620  
9,95.469,rs7864740,-0.620  
9,95.520,rs192703,-0.612  
9,95.574,rs1551746,-0.576  
9,95.605,rs296639,-0.543  
9,95.621,rs296620,-0.549  
9,95.653,rs4604577,-0.557  
9,95.677,rs4744038,-0.561  
9,95.686,rs10991808,-0.562  
9,95.699,rs7025775,-0.561  
9,95.853,rs7024443,-0.511  
9,95.854,rs1758695,-0.514  
9,95.862,rs7021746,-0.482  
9,95.930,rs12350727,-0.545  
9,95.934,rs7025323,-0.545  
9,95.982,rs1388966,-0.551  
9,96.031,rs10992022,-0.574  
9,96.049,rs7032274,-0.583  
9,96.097,rs7466603,-0.607  
9,96.109,rs9409651,-0.608  
9,96.142,rs7029673,-0.612  
9,96.143,rs17514461,-0.613  
9,96.146,rs3935382,-0.612  
9,96.215,rs7045662,-0.689  
9,96.226,rs7858435,-0.701  
9,96.337,rs12006507,-0.684  
9,96.473,rs3780346,-0.661  
9,96.711,rs7868651,-0.660  
9,96.782,rs10992498,-0.666

9,96.907,rs7850247,-0.649  
9,96.949,rs11788432,-0.646  
9,96.979,rs4744167,-0.687  
9,96.991,rs10992622,-0.746  
9,97.016,rs10992630,-0.697  
9,97.037,rs12003264,-0.694  
9,97.061,rs7025554,-0.694  
9,97.317,rs10739948,-0.682  
9,97.401,rs10992747,-0.682  
9,97.412,rs4744244,-0.681  
9,97.552,rs12551314,-0.653  
9,97.554,rs7033146,-0.653  
9,97.620,rs7023781,-0.723  
9,97.643,rs4744272,-0.744  
9,97.668,rs2255840,-0.770  
9,97.767,rs10992913,-0.816  
9,97.836,rs10992966,-0.745  
9,97.858,rs12353447,-0.720  
9,97.986,rs10429556,-0.741  
9,98.085,rs959802,-0.719  
9,98.093,rs10993070,-0.717  
9,98.102,rs10114341,-0.715  
9,98.185,rs7029157,-0.639  
9,98.192,rs2675275,-0.633  
9,98.210,rs3118766,-0.598  
9,98.240,rs1536690,-0.598  
9,98.451,rs9409787,-0.578  
9,98.470,rs12342274,-0.562  
9,98.547,rs2987900,-0.497  
9,98.581,rs10993269,-0.523  
9,98.640,rs10124217,-0.593  
9,98.658,rs12349751,-0.601  
9,98.700,rs10512235,-0.598  
9,99.169,rs1020963,-0.573  
9,99.833,rs356665,-0.503  
9,99.908,rs357527,-0.555  
9,99.915,rs357522,-0.557  
9,99.940,rs4448343,-0.573  
9,99.957,rs576594,-0.580  
9,99.973,rs10818991,-0.584  
9,99.981,rs930280,-0.597  
9,99.998,rs458477,-0.618  
9,100.005,rs2782951,-0.624  
9,100.010,rs354271,-0.628  
9,100.012,rs817166,-0.625  
9,100.024,rs4743293,-0.599  
9,100.028,rs7854146,-0.590  
9,100.029,rs7047415,-0.590  
9,100.051,rs2149564,-0.583  
9,100.118,rs4592147,-0.548  
9,100.127,rs4743521,-0.537  
9,100.140,rs4743556,-0.524  
9,100.142,rs7041700,-0.525  
9,100.146,rs12341515,-0.522  
9,100.151,rs4743597,-0.518  
9,100.174,rs2031321,-0.471  
9,100.183,rs2026001,-0.461  
9,100.184,rs2476923,-0.460  
9,100.194,rs8190512,-0.401  
9,100.203,rs12685240,-0.406  
9,100.212,rs10820410,-0.408

9,100.335,rs1596359,-0.418  
9,100.568,rs4743056,-0.436  
9,100.970,rs2242187,-0.412  
9,101.035,rs7853581,-0.417  
9,101.152,rs4576532,-0.389  
9,101.159,rs10759754,-0.389  
9,101.177,rs10982602,-0.400  
9,101.185,rs10817737,-0.403  
9,101.198,rs1475545,-0.374  
9,101.330,rs715749,-0.359  
9,101.430,rs2668802,-0.337  
9,101.441,rs2805838,-0.334  
9,101.488,rs1877432,-0.298  
9,101.523,rs7871887,-0.295  
9,101.648,rs6586,-0.286  
9,101.703,rs1059003,-0.270  
9,101.847,rs10984649,-0.222  
9,102.126,rs1886002,-0.177  
9,102.132,rs10760120,-0.177  
9,102.172,rs1746239,-0.170  
9,102.234,rs814027,-0.174  
9,102.305,rs16913573,-0.137  
9,102.361,rs3780453,-0.145  
9,102.391,rs12348328,-0.145  
9,102.596,rs7850445,-0.111  
9,102.680,rs12236069,-0.100  
9,103.142,rs7026022,-0.140  
9,103.317,rs1962051,-0.114  
9,103.810,rs1999877,-0.125  
9,104.146,rs10989097,-0.117  
9,104.264,rs1226588,-0.113  
9,104.374,rs13285837,-0.120  
9,104.396,rs6479028,-0.122  
9,104.494,rs10819849,-0.128  
9,104.524,rs16919567,-0.130  
9,104.732,rs10989395,-0.140  
9,104.741,rs2993805,-0.141  
9,104.801,rs1431463,-0.194  
9,104.812,rs9697078,-0.194  
9,104.862,rs1367756,-0.163  
9,104.931,rs1418002,-0.156  
9,104.950,rs10989474,-0.153  
9,104.969,rs1417999,-0.151  
9,104.982,rs2229594,-0.152  
9,105.016,rs2253258,-0.152  
9,105.020,rs17185855,-0.152  
9,105.026,rs546577,-0.153  
9,105.055,rs573816,-0.167  
9,105.073,rs10989518,-0.180  
9,105.085,rs1929494,-0.193  
9,105.173,rs1983812,-0.240  
9,105.194,rs1407877,-0.243  
9,105.374,rs4742825,-0.264  
9,105.376,rs10819994,-0.289  
9,105.396,rs2013563,-0.234  
9,105.407,rs16936082,-0.230  
9,105.441,rs16920898,-0.217  
9,105.478,rs10820006,-0.253  
9,105.480,rs1165806,-0.235  
9,105.536,rs1007468,-0.250  
9,105.566,rs4743514,-0.259

9,105.791,rs320202,-0.326  
9,105.809,rs12336913,-0.323  
9,105.812,rs1932169,-0.323  
9,105.825,rs16921368,-0.322  
9,105.861,rs7869148,-0.319  
9,105.900,rs959065,-0.317  
9,105.906,rs4376547,-0.295  
9,105.910,rs2417335,-0.281  
9,105.978,rs10733724,-0.274  
9,106.081,rs4743564,-0.266  
9,106.095,rs7875594,-0.265  
9,106.111,rs7046513,-0.263  
9,106.120,rs4743569,-0.259  
9,106.127,rs1332988,-0.256  
9,106.152,rs4743571,-0.212  
9,106.221,rs1552766,-0.168  
9,106.286,rs10990384,-0.179  
9,106.326,rs10760932,-0.186  
9,106.342,rs947184,-0.191  
9,106.367,rs12347896,-0.198  
9,106.373,rs843166,-0.200  
9,106.397,rs7873512,-0.205  
9,106.429,rs1839166,-0.199  
9,106.452,rs4743634,-0.198  
9,106.506,rs1378974,-0.207  
9,106.517,rs373637,-0.205  
9,106.588,rs12683176,-0.171  
9,106.606,rs17790711,-0.163  
9,106.636,rs2202828,-0.179  
9,106.669,rs4540458,-0.176  
9,106.727,rs17799628,-0.167  
9,106.739,rs970603,-0.165  
9,106.799,rs6479189,-0.155  
9,106.927,rs10820559,-0.153  
9,107.196,rs7874564,-0.154  
9,107.376,rs630103,-0.155  
9,107.931,rs2122582,-0.149  
9,108.027,rs884258,-0.155  
9,108.065,rs4743707,-0.120  
9,108.098,rs2933323,-0.096  
9,108.233,rs6479245,-0.079  
9,108.249,rs6479250,-0.082  
9,108.308,rs1464670,-0.083  
9,108.422,rs4742921,-0.094  
9,108.460,rs2230808,-0.097  
9,108.474,rs3818688,-0.081  
9,108.475,rs2254884,-0.080  
9,108.489,rs2065412,-0.102  
9,108.511,rs4149281,-0.121  
9,108.519,rs2000069,-0.121  
9,108.543,rs2482424,-0.097  
9,108.548,rs10820743,-0.093  
9,108.558,rs10991411,-0.088  
9,108.584,rs2472516,-0.089  
9,108.587,rs1561166,-0.089  
9,108.592,rs9919066,-0.087  
9,108.640,rs328875,-0.068  
9,108.643,rs328880,-0.067  
9,108.678,rs10991516,-0.064  
9,108.698,rs3005716,-0.061  
9,108.700,rs4609251,-0.061

9,108.717,rs7858499,-0.064  
9,108.755,rs3005738,-0.073  
9,108.933,rs957903,-0.080  
9,108.982,rs7872832,-0.093  
9,109.138,rs10978179,-0.088  
9,109.142,rs885954,-0.088  
9,109.149,rs583973,-0.072  
9,109.156,rs1463983,-0.072  
9,109.408,rs17285571,-0.054  
9,109.500,rs10978413,-0.048  
9,109.533,rs4742988,-0.046  
9,109.538,rs1516885,-0.045  
9,109.652,rs16936272,-0.016  
9,109.740,rs10759179,-0.003  
9,109.751,rs10759181,-0.002  
9,109.787,rs13294274,-0.001  
9,109.801,rs16925492,-0.001  
9,109.877,rs989980,0.000  
9,110.055,rs7018699,0.005  
9,110.195,rs1907438,0.003  
9,110.234,rs16925649,0.003  
9,110.317,rs1491113,0.002  
9,110.634,rs2172111,0.001  
9,110.647,rs2451948,0.001  
9,110.654,rs2493636,0.001  
9,110.677,rs10978628,0.001  
9,110.711,rs4237185,0.001  
9,110.846,rs4625093,-0.000  
9,111.452,rs12345400,0.000  
9,111.632,rs12351052,0.001  
9,111.637,rs1714474,0.001  
9,111.677,rs2417773,0.003  
9,111.690,rs12335940,0.001  
9,111.697,rs12336793,0.001  
9,111.710,rs2680197,0.001  
9,111.718,rs2680208,0.001  
9,111.726,rs13292544,0.002  
9,111.832,rs16912372,0.004  
9,111.838,rs1323809,0.004  
9,111.869,rs10816494,0.005  
9,111.891,rs1538985,0.011  
9,111.903,rs1746837,0.015  
9,111.919,rs817827,0.015  
9,111.952,rs12336348,0.016  
9,111.955,rs10739244,0.016  
9,111.963,rs947126,0.016  
9,111.985,rs10759237,0.021  
9,112.005,rs1819730,0.018  
9,112.037,rs954700,0.013  
9,112.060,rs7041758,0.012  
9,112.078,rs10119193,0.011  
9,112.095,rs10122326,0.008  
9,112.103,rs2258083,0.007  
9,112.156,rs7019214,0.001  
9,112.177,rs1110403,0.000  
9,112.216,rs7849612,-0.000  
9,112.236,rs10816550,-0.001  
9,112.257,rs2049366,-0.000  
9,112.303,rs4979291,-0.001  
9,112.306,rs7863292,-0.001  
9,112.310,rs1851741,-0.001

9,112.314,rs944178,-0.001  
9,112.359,rs17625789,-0.003  
9,112.368,rs953383,-0.004  
9,112.390,rs9632903,-0.005  
9,112.392,rs7848776,-0.005  
9,112.408,rs10733565,-0.008  
9,112.462,rs10759261,-0.005  
9,112.488,rs944472,-0.005  
9,112.497,rs1929276,-0.005  
9,112.530,rs1361369,-0.001  
9,112.544,rs7026539,-0.000  
9,112.573,rs498924,0.001  
9,112.594,rs7029391,0.002  
9,112.630,rs10512368,0.005  
9,112.731,rs10124038,0.005  
9,112.759,rs595811,0.000  
9,112.788,rs4542003,-0.000  
9,112.815,rs10759273,-0.000  
9,112.989,rs1330591,-0.000  
9,113.058,rs1570504,-0.000  
9,113.132,rs4978345,-0.001  
9,113.243,rs1556950,-0.001  
9,113.343,rs9886734,-0.001  
9,113.381,rs7047863,-0.000  
9,113.500,rs10979564,0.005  
9,113.533,rs2275496,0.007  
9,113.709,rs866311,0.009  
9,113.943,rs10816772,0.011  
9,114.044,rs3983526,0.011  
9,114.089,rs7858370,0.009  
9,114.100,rs7860076,0.009  
9,114.121,rs2012370,0.006  
9,114.238,rs3793549,0.004  
9,114.252,rs3763640,0.004  
9,114.272,rs4978793,0.001  
9,114.298,rs12553743,0.001  
9,114.303,rs7857376,0.001  
9,114.323,rs10979838,0.001  
9,114.421,rs17793748,0.001  
9,114.466,rs4978813,0.001  
9,114.490,rs10124300,0.000  
9,114.574,rs4978839,-0.000  
9,114.594,rs10123567,-0.002  
9,114.596,rs10979965,-0.003  
9,114.618,rs1407394,-0.004  
9,114.639,rs10979982,-0.004  
9,114.783,rs10512400,-0.010  
9,114.802,rs7028330,-0.008  
9,114.866,rs10759367,-0.005  
9,114.887,rs7032049,-0.005  
9,114.900,rs7867595,-0.004  
9,114.937,rs10980089,-0.003  
9,114.947,rs10980096,-0.002  
9,114.969,rs9409096,-0.001  
9,115.002,rs1981035,-0.000  
9,115.065,rs7035935,0.000  
9,115.112,rs995294,0.000  
9,115.143,rs12555129,0.001  
9,115.257,rs481661,0.012  
9,115.273,rs1980874,0.013  
9,115.300,rs7026192,0.019



9,115.334,rs2900505,0.025  
9,115.389,rs6477758,0.028  
9,115.481,rs7030192,0.026  
9,115.615,rs1889325,0.022  
9,115.631,rs10980412,0.023  
9,115.634,rs7046184,0.023  
9,115.706,rs16915122,0.025  
9,115.711,rs2991364,0.026  
9,115.734,rs11788554,0.024  
9,115.791,rs7875689,0.018  
9,115.801,rs4302915,0.018  
9,115.894,rs3010815,0.017  
9,115.939,rs7049083,0.019  
9,116.104,rs1409686,0.025  
9,116.106,rs2846444,0.025  
9,116.124,rs2821140,0.027  
9,116.125,rs540171,0.027  
9,116.201,rs512756,0.032  
9,116.203,rs693342,0.032  
9,116.229,rs1536435,0.017  
9,116.438,rs12353038,0.042  
9,116.451,rs2287005,0.040  
9,116.463,rs7041855,0.037  
9,116.482,rs4978434,0.036  
9,116.514,rs4246886,0.027  
9,116.629,rs2026801,0.028  
9,116.684,rs16936387,0.025  
9,116.690,rs7871113,0.024  
9,116.697,rs7020211,0.023  
9,116.750,rs7861100,0.016  
9,116.766,rs9299199,0.014  
9,116.840,rs17320021,0.010  
9,116.847,rs10980952,0.010  
9,116.897,rs10817197,0.008  
9,116.984,rs7863832,0.020  
9,116.988,rs16916293,0.021  
9,117.221,rs10817227,0.039  
9,117.300,rs16916456,0.039  
9,117.354,rs419097,0.031  
9,117.371,rs4979067,0.029  
9,117.379,rs7047037,0.029  
9,117.446,rs4401941,0.027  
9,117.487,rs7854368,0.025  
9,117.570,rs7854746,0.042  
9,117.639,rs2900537,0.036  
9,117.729,rs7855745,0.034  
9,117.760,rs7038217,0.034  
9,118.279,rs7862690,0.033  
9,118.481,rs1537055,0.039  
9,119.447,rs2798317,0.006  
9,119.515,rs4979142,0.004  
9,119.580,rs10981474,0.002  
9,119.588,rs786962,0.002  
9,119.647,rs805050,0.002  
9,119.971,rs1925081,0.007  
9,120.058,rs9886741,0.005  
9,120.096,rs4979204,0.005  
9,120.099,rs10981589,0.005  
9,120.102,rs10513176,0.005  
9,120.157,rs10981613,0.012  
9,120.264,rs13294922,0.018

9,120.321,rs9792498,0.015  
9,120.352,rs4344146,0.023  
9,120.376,rs10739387,0.023  
9,120.646,rs10817479,0.031  
9,120.710,rs4978539,0.033  
9,120.723,rs12342334,0.033  
9,120.731,rs10817488,0.042  
9,120.737,rs1043836,0.040  
9,120.752,rs818702,0.042  
9,120.762,rs818708,0.048  
9,120.763,rs1805313,0.049  
9,120.767,rs2761016,0.049  
9,121.148,rs10817494,0.074  
9,121.187,rs540599,0.077  
9,121.222,rs7862521,0.074  
9,121.223,rs7035632,0.075  
9,121.231,rs13291990,0.083  
9,121.249,rs2101069,0.079  
9,121.292,rs16907988,0.084  
9,121.295,rs586348,0.085  
9,121.427,rs10981914,0.097  
9,121.453,rs1359637,0.091  
9,121.481,rs10981955,0.086  
9,121.483,rs2150014,0.085  
9,121.485,rs1571578,0.060  
9,121.486,rs11787940,0.036  
9,121.487,rs1853546,0.040  
9,121.488,rs3810928,0.045  
9,121.490,rs4978567,0.040  
9,121.514,rs2043195,0.028  
9,121.526,rs2002284,0.022  
9,121.543,rs919641,0.021  
9,121.563,rs2808781,0.021  
9,121.599,rs2808770,0.022  
9,121.620,rs10759685,0.050  
9,121.621,rs7875437,0.045  
9,121.623,rs10982124,0.027  
9,121.625,rs1623718,0.021  
9,121.626,rs5003737,0.022  
9,121.627,rs1766059,0.025  
9,121.629,rs946053,0.031  
9,121.631,rs4979365,0.033  
9,121.634,rs7851482,0.030  
9,121.649,rs10759693,0.032  
9,121.665,rs1535960,0.034  
9,121.672,rs10759716,0.026  
9,121.678,rs4979427,0.019  
9,121.683,rs12238437,0.019  
9,121.688,rs4979444,0.020  
9,121.691,rs12379659,0.021  
9,121.701,rs7853853,0.024  
9,121.704,rs17816047,0.025  
9,121.793,rs7048659,0.045  
9,121.937,rs2006996,0.052  
9,122.065,rs7028891,0.063  
9,122.111,rs2295800,0.066  
9,122.198,rs17292115,0.060  
9,122.209,rs11791315,0.064  
9,122.269,rs10123153,0.086  
9,122.328,rs10817694,0.100  
9,122.473,rs1556220,0.112

9,122.542,rs1330351,0.116  
9,122.611,rs10982536,0.116  
9,122.660,rs10982549,0.117  
9,122.847,rs10759761,0.119  
9,122.861,rs1335357,0.119  
9,122.879,rs10817727,0.119  
9,122.932,rs10120911,0.120  
9,122.960,rs10125253,0.121  
9,123.039,rs7039836,0.119  
9,123.097,rs1157836,0.127  
9,123.192,rs7859920,0.138  
9,123.199,rs1981500,0.181  
9,123.229,rs10982853,0.138  
9,123.233,rs956325,0.136  
9,123.354,rs7855735,0.144  
9,123.401,rs7865455,0.151  
9,123.514,rs11787606,0.187  
9,123.531,rs7467853,0.193  
9,123.592,rs10817854,0.199  
9,123.611,rs1901069,0.200  
9,123.656,rs204169,0.183  
9,123.822,rs446783,0.204  
9,123.875,rs10983088,0.262  
9,123.901,rs10435873,0.286  
9,123.945,rs11999361,0.301  
9,123.963,rs13294988,0.313  
9,123.990,rs12353147,0.322  
9,124.093,rs6478241,0.305  
9,124.140,rs16933725,0.357  
9,124.214,rs961797,0.359  
9,124.219,rs12338231,0.414  
9,124.220,rs10983343,0.425  
9,124.222,rs1441750,0.437  
9,124.224,rs4837849,0.435  
9,124.226,rs7021928,0.434  
9,124.241,rs7034397,0.408  
9,124.266,rs2225067,0.394  
9,124.280,rs10983400,0.337  
9,124.281,rs7029188,0.334  
9,124.328,rs1537528,0.326  
9,124.330,rs10739481,0.294  
9,124.342,rs10481683,0.326  
9,124.343,rs10983472,0.325  
9,124.350,rs6478278,0.316  
9,124.360,rs1105892,0.302  
9,124.376,rs11789213,0.288  
9,124.387,rs13283855,0.278  
9,124.392,rs1537526,0.273  
9,124.404,rs977937,0.263  
9,124.425,rs10121207,0.289  
9,124.468,rs7021801,0.264  
9,124.542,rs1416942,0.247  
9,124.798,rs10983672,0.199  
9,124.817,rs2786130,0.204  
9,124.915,rs1985317,0.209  
9,125.049,rs7858743,0.229  
9,125.149,rs1928295,0.220  
9,125.256,rs913615,0.202  
9,125.379,rs2722841,0.174  
9,125.400,rs2416604,0.172  
9,125.745,rs12552190,0.203

9,125.785,rs1571272,0.186  
9,126.021,rs7866799,0.236  
9,126.267,rs1984268,0.281  
9,126.480,rs17448174,0.334  
9,126.485,rs10116305,0.335  
9,126.500,rs10818187,0.354  
9,126.506,rs10759982,0.361  
9,126.554,rs7864368,0.334  
9,126.581,rs10984116,0.357  
9,126.772,rs4836729,0.342  
9,126.792,rs577362,0.350  
9,126.799,rs16907545,0.352  
9,126.823,rs12235164,0.361  
9,126.915,rs2136062,0.388  
9,126.961,rs943259,0.393  
9,127.275,rs12237612,0.371  
9,127.401,rs2818294,0.320  
9,127.450,rs4836741,0.301  
9,127.495,rs10760015,0.289  
9,127.577,rs7018768,0.292  
9,127.756,rs1043379,0.287  
9,127.830,rs10760025,0.281  
9,127.836,rs680003,0.279  
9,127.898,rs4540472,0.217  
9,127.913,rs2025501,0.207  
9,127.936,rs10984519,0.191  
9,127.976,rs9299261,0.163  
9,127.996,rs1412055,0.174  
9,128.005,rs10984568,0.179  
9,128.026,rs1009470,0.195  
9,128.050,rs990622,0.200  
9,128.090,rs7021853,0.212  
9,128.128,rs1860665,0.223  
9,128.144,rs6415829,0.174  
9,128.150,rs12551982,0.173  
9,128.196,rs1413317,0.214  
9,128.197,rs16909026,0.212  
9,128.200,rs1333913,0.208  
9,128.217,rs2225659,0.164  
9,128.222,rs10984725,0.126  
9,128.238,rs1333908,0.135  
9,128.240,rs6478444,0.137  
9,128.272,rs10984806,0.237  
9,128.275,rs12344392,0.248  
9,128.294,rs6478456,0.269  
9,128.301,rs945246,0.267  
9,128.315,rs4837719,0.276  
9,128.344,rs10739558,0.290  
9,128.356,rs887807,0.291  
9,128.380,rs1537282,0.308  
9,128.387,rs7852100,0.307  
9,128.411,rs7869290,0.303  
9,128.558,rs3761847,0.273  
9,128.569,rs7035682,0.272  
9,128.727,rs1590345,0.259  
9,129.124,rs4837876,0.273  
9,129.180,rs580010,0.281  
9,129.214,rs2777319,0.304  
9,129.238,rs1984035,0.273  
9,129.244,rs2789875,0.273  
9,129.279,rs12554667,0.243

9,129.317,rs7875955,0.264  
9,129.554,rs10818605,0.207  
9,129.603,rs7871736,0.203  
9,129.637,rs9408931,0.177  
9,129.653,rs6478548,0.173  
9,129.718,rs4534187,0.158  
9,130.001,rs10760211,0.134  
9,130.006,rs2039197,0.155  
9,130.033,rs10818649,0.126  
9,130.040,rs10818651,0.135  
9,130.054,rs12345155,0.141  
9,130.077,rs10733657,0.147  
9,130.079,rs1060586,0.148  
9,130.083,rs11794068,0.146  
9,130.134,rs10818673,0.125  
9,130.242,rs4837960,0.138  
9,130.390,rs7865902,0.155  
9,130.416,rs2416863,0.147  
9,130.441,rs10985662,0.151  
9,130.465,rs10818708,0.158  
9,130.498,rs2416875,0.152  
9,130.499,rs7859232,0.152  
9,130.584,rs727913,0.146  
9,130.597,rs10491515,0.149  
9,130.639,rs2215532,0.164  
9,130.645,rs237617,0.166  
9,130.648,rs237622,0.168  
9,130.865,rs10818752,0.141  
9,130.868,rs7037776,0.141  
9,131.031,rs10818768,0.152  
9,132.358,rs2416901,0.100  
9,132.368,rs10114139,0.102  
9,132.398,rs10985997,0.072  
9,132.401,rs4838057,0.070  
9,132.413,rs12347955,0.070  
9,132.414,rs7026808,0.070  
9,132.418,rs3924101,0.064  
9,132.423,rs10818820,0.070  
9,132.802,rs4836950,0.046  
9,132.816,rs1327291,0.049  
9,132.881,rs4838113,0.058  
9,132.884,rs10986211,0.059  
9,132.897,rs1463729,0.063  
9,132.904,rs2638377,0.065  
9,132.924,rs7865381,0.062  
9,133.080,rs4838118,0.020  
9,133.090,rs662621,0.029  
9,133.096,rs11789451,0.036  
9,133.119,rs636033,0.037  
9,133.327,rs599063,0.042  
9,133.545,rs2819625,0.046  
9,133.601,rs6478704,0.048  
9,133.616,rs10760398,0.049  
9,134.151,rs7031865,0.060  
9,134.158,rs11793676,0.060  
9,134.489,rs7045552,0.092  
9,134.536,rs13290624,0.081  
9,134.546,rs4838311,0.077  
9,134.571,rs10217721,0.075  
9,134.636,rs2041944,0.053  
9,134.652,rs4838340,0.053

9,134.667,rs7046411,0.052  
9,134.691,rs10122194,0.050  
9,134.706,rs7018610,0.049  
9,134.707,rs10987177,0.049  
9,134.756,rs2417008,0.055  
9,134.766,rs2065183,0.057  
9,134.779,rs12005670,0.055  
9,134.813,rs10760423,0.042  
9,134.848,rs2026808,0.045  
9,134.856,rs1317309,0.036  
9,134.860,rs7466244,0.037  
9,134.863,rs1230760,0.038  
9,134.877,rs504184,0.037  
9,134.927,rs505442,0.022  
9,134.955,rs10124379,0.022  
9,135.101,rs2417022,0.021  
9,135.118,rs10987305,0.024  
9,135.169,rs10987324,0.031  
9,135.195,rs945683,0.031  
9,135.211,rs10987361,0.026  
9,135.266,rs4455975,0.012  
9,135.283,rs12336217,0.015  
9,135.303,rs7853174,0.023  
9,135.344,rs10733682,0.031  
9,135.370,rs3850586,0.030  
9,135.395,rs913716,0.028  
9,135.422,rs12352423,0.032  
9,135.432,rs2417038,0.035  
9,135.457,rs2900252,0.042  
9,135.510,rs10819243,0.055  
9,135.816,rs10819272,0.080  
9,135.910,rs2779727,0.083  
9,136.121,rs2265814,0.074  
9,136.168,rs2252730,0.076  
9,136.245,rs17382675,0.097  
9,136.334,rs1999224,0.132  
9,136.399,rs7856096,0.142  
9,136.414,rs10121110,0.144  
9,136.421,rs7865146,0.149  
9,136.441,rs10819317,0.152  
9,136.454,rs3739821,0.154  
9,136.508,rs4240425,0.137  
9,136.568,rs3003609,0.181  
9,136.806,rs4271068,0.179  
9,137.376,rs7019382,0.178  
9,138.255,rs10988014,0.172  
9,138.852,rs4836625,0.140  
9,138.969,rs2293964,0.136  
9,139.239,rs2287363,0.126  
9,139.287,rs11564101,0.130  
9,139.479,rs7036689,0.143  
9,139.541,rs10988248,0.149  
9,139.602,rs10739745,0.156  
9,139.683,rs10819490,0.175  
9,139.732,rs4837357,0.206  
9,139.740,rs10988323,0.212  
9,139.765,rs4837360,0.229  
9,139.824,rs3853486,0.193  
9,139.859,rs7046787,0.140  
9,139.899,rs914708,0.179  
9,139.912,rs1147338,0.145

9,139.988,rs1220793,0.158  
9,140.009,rs1780456,0.161  
9,140.080,rs7867936,0.149  
9,140.096,rs1220687,0.149  
9,140.114,rs1220680,0.170  
9,140.147,rs1220651,0.164  
9,140.197,rs1861782,0.153  
9,140.208,rs3088095,0.150  
9,140.234,rs7866311,0.150  
9,140.289,rs10819557,0.169  
9,140.313,rs3861882,0.162  
9,140.383,rs10739757,0.138  
9,140.408,rs3844048,0.112  
9,140.440,rs11999731,0.111  
9,140.471,rs7025992,0.111  
9,140.600,rs880242,0.127  
9,140.879,rs1923664,0.085  
9,140.991,rs2159640,0.077  
9,141.075,rs1003415,0.085  
9,141.104,rs12347960,0.062  
9,141.136,rs12378342,0.041  
9,141.146,rs3780708,0.038  
9,141.202,rs7024495,0.030  
9,141.327,rs4837486,0.018  
9,141.389,rs6478961,0.012  
9,141.665,rs914977,0.024  
9,141.688,rs7047329,0.032  
9,141.707,rs7031579,0.036  
9,141.712,rs7020021,0.037  
9,141.766,rs10736862,0.037  
9,141.776,rs7044220,0.036  
9,141.815,rs12342208,0.029  
9,141.839,rs11243372,0.034  
9,141.953,rs13301412,0.049  
9,141.976,rs4740339,0.042  
9,141.983,rs7874812,0.040  
9,142.015,rs4740194,0.037  
9,142.320,rs2583839,0.031  
9,142.433,rs2855179,0.034  
9,142.609,rs12005009,0.036  
9,142.650,rs3802347,0.035  
9,142.680,rs13293102,0.039  
9,142.702,rs7864465,0.043  
9,142.730,rs10901309,0.058  
9,142.774,rs12346096,0.075  
9,142.800,rs10901316,0.086  
9,142.825,rs10901317,0.089  
9,142.846,rs915401,0.092  
9,142.882,rs3808810,0.069  
9,142.890,rs3780275,0.067  
9,142.916,rs10901333,0.088  
9,142.992,rs818051,0.069  
9,143.037,rs353513,0.061  
9,143.072,rs102993,0.064  
9,143.555,rs9966,0.046  
9,143.642,rs10793992,0.045  
9,143.774,rs2986608,0.044  
9,144.060,rs4740438,0.050  
9,144.076,rs522464,0.064  
9,144.150,rs2050243,0.061  
9,144.201,rs7852711,0.059

9,144.297,rs6597494,0.056  
9,145.492,rs7036006,0.020  
9,145.495,rs4740170,0.013  
9,145.577,rs17148209,0.011  
9,145.589,rs4740304,0.010  
9,145.610,rs1887778,0.015  
9,145.614,rs869382,0.019  
9,145.619,rs3012735,0.025  
9,145.628,rs10901096,0.020  
9,145.634,rs12683140,0.021  
9,145.639,rs11243539,0.023  
9,145.673,rs2987392,0.022  
9,145.702,rs2987401,0.021  
9,146.008,rs7047055,0.016  
9,146.494,rs1331630,0.008  
9,146.497,rs7865653,0.008  
9,146.526,rs9411446,0.021  
9,146.581,rs11788925,0.027  
9,146.617,rs7870760,0.030  
9,146.686,rs17148812,0.026  
9,146.687,rs1810887,0.026  
9,146.726,rs4962062,0.044  
9,146.873,rs514279,0.069  
9,147.098,rs944616,0.075  
9,147.113,rs557495,0.078  
9,147.213,rs529317,0.123  
9,147.227,rs787887,0.125  
9,147.277,rs472207,0.132  
9,147.352,rs10120389,0.129  
9,147.399,rs518457,0.127  
9,147.426,rs2363020,0.126  
9,147.474,rs944812,0.126  
9,147.626,rs717770,0.133  
9,147.657,rs880182,0.134  
9,147.729,rs445990,0.137  
9,148.120,rs306530,0.167  
9,148.180,rs4962210,0.191  
9,148.207,rs11243900,0.192  
9,148.821,rs3761840,0.236  
9,148.896,rs7040593,0.236  
9,148.976,rs7036106,0.231  
9,148.993,rs1964196,0.232  
9,149.027,rs8193003,0.228  
9,149.035,rs678946,0.228  
9,149.067,rs628094,0.238  
9,149.080,rs603328,0.237  
9,149.155,rs608604,0.234  
9,149.156,rs7035838,0.233  
9,149.244,rs7863758,0.185  
9,149.329,rs509064,0.157  
9,149.391,rs7023365,0.147  
9,149.510,rs482670,0.165  
9,149.563,rs7022583,0.148  
9,149.613,rs2073924,0.132  
9,149.646,rs2039184,0.100  
9,149.773,rs4489379,0.099  
9,149.813,rs11999677,0.096  
9,149.994,rs630014,0.082  
9,150.139,rs597411,0.077  
9,150.765,rs3094378,0.104  
9,151.501,rs3025336,0.106



9,151.552,rs1029372,0.105  
9,151.606,rs11998869,0.112  
9,151.654,rs3025373,0.120  
9,151.693,rs2007153,0.126  
9,151.703,rs2873804,0.127  
9,151.773,rs77905,0.154  
9,152.066,rs694821,0.150  
9,152.365,rs10993790,0.114  
9,152.410,rs622035,0.104  
9,152.474,rs602990,0.091  
9,152.551,rs3824561,0.094  
9,152.751,rs3893493,0.083  
9,153.226,rs608402,0.043  
9,153.288,rs2265520,0.051  
9,153.360,rs654387,0.048  
9,153.524,rs452943,0.058  
9,153.539,rs3780792,0.059  
9,153.542,rs2506686,0.058  
9,153.614,rs7018770,0.031  
9,153.637,rs2789864,0.025  
9,153.709,rs460126,0.011  
9,153.755,rs17664384,0.012  
9,154.016,rs17566226,0.020  
9,154.056,rs1075654,0.024  
9,154.243,rs2427971,0.038  
9,154.383,rs4292757,0.055  
9,154.420,rs4744560,0.059  
9,155.110,rs7028191,0.093  
9,155.140,rs10881587,0.097  
9,155.224,rs4917362,0.092  
9,155.275,rs4917339,0.087  
9,155.351,rs1889152,0.118  
9,155.367,rs1930788,0.120  
9,155.494,rs7871088,0.160  
9,155.779,rs4917354,0.182  
9,156.284,rs1805343,0.205  
9,156.334,rs3118526,0.210  
9,156.586,rs10776949,0.228  
9,156.720,rs9409970,0.195  
9,156.731,rs3132330,0.211  
9,156.779,rs10776839,0.166  
9,156.833,rs1006418,0.149  
9,156.890,rs943423,0.140  
9,157.181,rs4842136,0.143  
9,157.211,rs7020813,0.139  
9,157.309,rs12344933,0.157  
9,157.332,rs7341858,0.145  
9,157.484,rs10858265,0.146  
9,157.531,rs4335205,0.147  
9,157.738,rs4842145,0.125  
9,157.763,rs3109678,0.120  
9,157.797,rs10745384,0.118  
9,157.829,rs4842169,0.131  
9,157.846,rs4842173,0.107  
9,157.873,rs9410004,0.056  
9,157.885,rs4073505,0.040  
9,157.890,rs3128632,0.039  
9,157.921,rs2989735,0.038  
9,157.946,rs2274838,0.035  
9,157.961,rs10858302,0.030  
9,157.997,rs13290953,0.022

9,158.016,rs10776925,0.018  
9,158.018,rs6537976,0.018  
9,158.038,rs607223,0.010  
9,158.072,rs546682,0.004  
9,158.095,rs899842,0.001  
9,158.101,rs11103675,0.001  
9,158.111,rs7039212,0.001  
9,158.131,rs1778992,0.001  
9,158.132,rs1752664,0.001  
9,158.139,rs1778990,0.000  
9,158.156,rs7034486,-0.000  
9,158.159,rs2382864,-0.001  
9,158.167,rs10858365,-0.005  
9,158.168,rs10858366,-0.005  
9,158.182,rs1891996,-0.025  
9,158.192,rs7042583,-0.026  
9,158.198,rs7028584,-0.023  
9,158.222,rs2382859,-0.013  
9,158.230,rs11792631,-0.009  
9,158.251,rs11103787,-0.002  
9,158.252,rs914405,-0.001  
9,158.261,rs10745401,0.002  
9,158.271,rs10858383,0.008  
9,158.275,rs3884535,0.006  
9,158.279,rs7032559,0.004  
9,158.317,rs9409933,0.009  
9,158.360,rs13294986,0.023  
9,158.372,rs6537893,0.017  
9,158.391,rs10776810,0.018  
9,158.416,rs4841875,0.019  
9,158.425,rs2590504,0.008  
9,158.433,rs1412512,0.001  
9,158.447,rs3762067,-0.000  
9,158.462,rs756684,-0.003  
9,158.472,rs13284515,-0.002  
9,158.489,rs462537,-0.001  
9,158.490,rs7045084,-0.001  
9,158.499,rs7023309,-0.005  
9,158.507,rs11103063,-0.000  
9,158.525,rs7029507,-0.000  
9,158.537,rs7873626,-0.000  
9,158.555,rs4841889,-0.001  
9,158.570,rs11103115,-0.001  
9,158.585,rs488948,-0.001  
9,158.600,rs514157,-0.001  
9,158.638,rs487750,-0.003  
9,158.674,rs10735239,-0.003  
9,158.697,rs914428,-0.005  
9,158.794,rs1009473,-0.007  
9,158.829,rs4842047,-0.005  
9,158.859,rs7868264,-0.001  
9,158.882,rs2152174,-0.002  
9,158.898,rs7869795,-0.004  
9,158.915,rs4842074,-0.006  
9,158.946,rs4842091,-0.011  
9,158.956,rs11103302,-0.009  
9,158.961,rs10776875,-0.008  
9,158.980,rs1717453,-0.004  
9,159.019,rs1747846,-0.000  
9,159.022,rs1747856,-0.000  
9,159.081,rs3780190,-0.000

9,159.235,rs3812561,0.018  
9,159.293,rs1127152,0.035  
9,159.354,rs3124599,0.053  
9,159.364,rs3124607,0.058  
9,159.373,rs13290979,0.060  
9,159.426,rs944758,0.073  
9,159.440,rs11145791,0.056  
9,159.441,rs10870094,0.056  
9,159.480,rs7871194,0.060  
9,159.487,rs4880117,0.062  
9,159.507,rs9411216,0.053  
9,159.528,rs10870112,0.048  
9,159.613,rs945387,0.045  
9,159.727,rs3750512,0.041  
9,159.762,rs11793787,0.039  
9,159.824,rs12337910,0.049  
9,159.827,rs7038280,0.050  
9,159.925,rs10870198,0.068  
9,160.224,rs10116708,0.107  
9,160.238,rs4962232,0.109  
9,160.258,rs11137410,0.112  
9,160.278,rs1099298,0.117  
9,160.429,rs7039441,0.141  
9,160.544,rs4526432,0.149  
9,160.564,rs7862101,0.152  
9,160.567,rs11137281,0.152  
9,160.744,rs1123190,0.216  
9,160.791,rs2739257,0.220  
9,160.792,rs2606357,0.220  
10,1.427,rs4881313,-0.157  
10,1.683,rs17136372,-0.121  
10,1.728,rs1581843,-0.111  
10,1.730,rs2265090,-0.128  
10,1.736,rs7916968,-0.125  
10,1.756,rs943204,-0.128  
10,1.807,rs10752019,-0.132  
10,1.901,rs11253471,-0.152  
10,2.107,rs10508204,-0.117  
10,2.173,rs10794717,-0.107  
10,2.202,rs7899518,-0.129  
10,2.295,rs4002637,-0.115  
10,2.296,rs883248,-0.134  
10,2.330,rs4880802,-0.114  
10,2.353,rs6560721,-0.096  
10,2.390,rs4880811,-0.071  
10,2.393,rs1027604,-0.072  
10,2.395,rs1542874,-0.077  
10,2.397,rs11250389,-0.078  
10,2.435,rs904962,-0.063  
10,2.462,rs2892333,-0.057  
10,2.516,rs11592576,-0.046  
10,2.540,rs2805543,-0.042  
10,2.587,rs10903459,-0.053  
10,2.600,rs2676753,-0.056  
10,2.602,rs7906088,-0.057  
10,2.611,rs12784235,-0.056  
10,2.668,rs7082213,-0.035  
10,2.689,rs4880516,-0.032  
10,2.696,rs2813363,-0.031  
10,2.786,rs2813392,-0.031  
10,2.795,rs4880882,-0.032

10,2.877,rs1112787,-0.027  
10,2.970,rs10082419,-0.025  
10,3.069,rs4880897,-0.022  
10,3.293,rs7896371,-0.025  
10,3.332,rs11250736,-0.016  
10,3.375,rs6560762,-0.013  
10,3.425,rs4880535,-0.007  
10,3.650,rs6560768,-0.020  
10,3.808,rs4076746,-0.022  
10,4.008,rs4880930,-0.013  
10,4.028,rs7912438,-0.013  
10,4.265,rs17222168,-0.008  
10,4.330,rs7923512,-0.007  
10,4.513,rs10794806,-0.004  
10,4.558,rs10903603,-0.003  
10,4.653,rs7912369,-0.003  
10,4.854,rs1414125,-0.002  
10,5.040,rs4880970,-0.001  
10,5.150,rs10794850,-0.000  
10,5.327,rs1999531,-0.001  
10,5.405,rs17817879,-0.001  
10,5.437,rs10508223,-0.001  
10,5.485,rs1984070,-0.002  
10,5.642,rs7919956,-0.001  
10,5.660,rs12412942,-0.000  
10,5.675,rs7087615,0.000  
10,5.689,rs12779267,0.000  
10,5.707,rs7084211,0.000  
10,5.734,rs7895038,0.000  
10,5.765,rs4880562,0.001  
10,5.810,rs17158371,0.001  
10,5.825,rs9423540,0.001  
10,5.845,rs9663489,0.001  
10,5.907,rs4433480,0.002  
10,6.556,rs7893477,0.009  
10,6.974,rs1008859,0.021  
10,7.011,rs7920763,0.018  
10,7.041,rs7906405,0.021  
10,7.105,rs7909413,0.028  
10,7.242,rs1413764,0.029  
10,7.601,rs11251491,0.029  
10,8.046,rs1889504,0.027  
10,8.082,rs1577251,0.027  
10,8.501,rs2065681,0.025  
10,8.617,rs4436465,0.025  
10,8.761,rs6601988,0.023  
10,9.119,rs4242741,0.019  
10,10.572,rs10794989,0.011  
10,10.656,rs17135074,0.012  
10,10.750,rs7089499,0.013  
10,10.898,rs10732921,0.024  
10,10.921,rs7091953,0.023  
10,10.991,rs11251694,0.039  
10,11.030,rs4881075,0.052  
10,11.053,rs2388595,0.045  
10,11.057,rs10903963,0.046  
10,11.072,rs2892550,0.047  
10,11.096,rs2306304,0.044  
10,11.101,rs2388567,0.044  
10,11.146,rs4880592,0.057  
10,11.188,rs3740607,0.055

10,11.248,rs17133550,0.050  
10,11.268,rs7078068,0.048  
10,11.296,rs17131865,0.027  
10,11.337,rs10751916,0.015  
10,11.405,rs12269271,0.015  
10,11.438,rs2814925,0.012  
10,11.453,rs2814930,0.010  
10,11.493,rs4489652,0.007  
10,11.499,rs12220117,0.007  
10,11.533,rs1570856,0.007  
10,11.607,rs549676,0.010  
10,11.647,rs737533,0.008  
10,11.695,rs10751920,0.010  
10,11.718,rs1337381,0.011  
10,11.861,rs10508254,0.012  
10,12.287,rs1441265,0.016  
10,12.456,rs7919625,0.020  
10,12.523,rs11251995,0.015  
10,12.565,rs10508258,0.012  
10,12.623,rs2129446,0.006  
10,12.640,rs4881197,0.006  
10,12.743,rs7094917,0.002  
10,12.828,rs7071559,-0.003  
10,12.839,rs2171302,-0.003  
10,12.904,rs7919841,-0.001  
10,12.921,rs7906552,-0.002  
10,12.952,rs7076208,-0.006  
10,12.961,rs11252119,-0.007  
10,12.964,rs17842279,-0.013  
10,12.964,rs11252121,-0.013  
10,12.964,rs6601764,-0.013  
10,12.979,rs4880635,-0.030  
10,12.980,rs7914924,-0.034  
10,12.982,rs11591800,-0.043  
10,12.992,rs10904103,-0.042  
10,13.005,rs11597773,-0.025  
10,13.061,rs17135906,-0.023  
10,13.090,rs4881226,-0.026  
10,13.192,rs4881234,-0.024  
10,13.208,rs12217962,-0.023  
10,13.245,rs943031,-0.022  
10,13.396,rs11252237,-0.014  
10,13.632,rs11252318,-0.010  
10,13.679,rs11252333,-0.005  
10,13.761,rs1885477,-0.015  
10,13.898,rs17132251,-0.013  
10,13.962,rs2181124,-0.010  
10,14.086,rs4881303,-0.020  
10,14.175,rs1923396,-0.028  
10,14.400,rs11252485,-0.013  
10,14.482,rs12784701,-0.013  
10,14.523,rs993175,-0.004  
10,14.618,rs1679444,-0.001  
10,14.678,rs2127598,-0.003  
10,14.711,rs9663977,-0.004  
10,14.737,rs12415117,-0.004  
10,14.770,rs4551658,-0.003  
10,14.892,rs7079674,-0.006  
10,14.933,rs416990,-0.005  
10,15.020,rs1498271,-0.004  
10,15.079,rs11252619,-0.002

10,15.085,rs17297024,-0.002  
10,15.146,rs6601853,-0.004  
10,15.169,rs313445,-0.005  
10,15.193,rs313451,-0.008  
10,15.194,rs313452,-0.008  
10,15.225,rs10508287,-0.007  
10,15.309,rs7080649,-0.001  
10,15.318,rs433430,-0.001  
10,15.352,rs10904321,-0.000  
10,15.410,rs2397839,-0.001  
10,15.424,rs12416000,-0.001  
10,15.429,rs4146754,-0.001  
10,15.447,rs2961618,-0.001  
10,15.582,rs10795206,-0.006  
10,15.658,rs4457653,-0.008  
10,15.764,rs4323780,-0.010  
10,15.957,rs12249281,-0.009  
10,16.024,rs2211623,-0.013  
10,16.065,rs6601900,-0.016  
10,16.101,rs2801883,-0.017  
10,16.523,rs7097810,-0.023  
10,16.592,rs9423407,-0.026  
10,16.627,rs7477268,-0.019  
10,16.743,rs11253141,-0.012  
10,16.748,rs10904487,-0.011  
10,17.020,rs4078293,-0.005  
10,17.042,rs4462243,-0.006  
10,17.082,rs10904523,-0.011  
10,17.135,rs12415024,-0.015  
10,17.138,rs7922769,-0.015  
10,17.164,rs4348801,-0.008  
10,17.170,rs4881483,-0.019  
10,17.175,rs12769978,-0.019  
10,17.222,rs7075917,-0.018  
10,17.250,rs4750500,-0.021  
10,17.269,rs6602236,-0.026  
10,17.317,rs4749861,-0.028  
10,17.329,rs2386649,-0.028  
10,17.365,rs3750640,-0.023  
10,17.386,rs4750217,-0.020  
10,17.540,rs2890365,-0.023  
10,17.634,rs1567705,-0.027  
10,17.885,rs3750657,-0.027  
10,17.945,rs2296137,-0.026  
10,18.004,rs646406,-0.024  
10,18.013,rs2669130,-0.024  
10,18.043,rs8177741,-0.029  
10,18.058,rs2228059,-0.032  
10,18.071,rs2296139,-0.033  
10,18.072,rs8177685,-0.033  
10,18.117,rs7904224,-0.035  
10,18.120,rs6602360,-0.035  
10,18.174,rs12244380,-0.033  
10,18.234,rs7072398,-0.031  
10,18.250,rs706780,-0.032  
10,18.294,rs7072793,-0.035  
10,18.323,rs4749955,-0.034  
10,18.428,rs4750000,-0.044  
10,18.438,rs4750005,-0.045  
10,18.443,rs4310524,-0.046  
10,18.446,rs7914915,-0.045

10,18.547,rs616246,-0.035  
10,18.548,rs11599872,-0.035  
10,18.552,rs674430,-0.035  
10,18.558,rs11257103,-0.052  
10,18.571,rs647439,-0.036  
10,18.589,rs637452,-0.030  
10,18.590,rs11257188,-0.029  
10,18.622,rs2516614,-0.017  
10,18.633,rs756567,-0.011  
10,18.646,rs1557111,-0.017  
10,18.665,rs7071157,-0.012  
10,18.666,rs3793721,-0.013  
10,18.690,rs17152400,-0.021  
10,18.703,rs7916923,-0.026  
10,18.723,rs10508301,-0.016  
10,18.752,rs12780002,-0.008  
10,18.775,rs17152987,-0.005  
10,18.870,rs2387396,-0.002  
10,18.936,rs947470,-0.000  
10,18.952,rs12570830,-0.000  
10,18.983,rs4748026,0.000  
10,19.041,rs661985,0.004  
10,19.206,rs658230,0.039  
10,19.215,rs11597105,0.041  
10,19.264,rs4750531,0.047  
10,19.271,rs6602747,0.047  
10,19.284,rs1409876,0.047  
10,19.404,rs6602820,0.042  
10,19.415,rs10752356,0.039  
10,19.491,rs1556003,0.020  
10,19.524,rs9423942,0.029  
10,19.530,rs1327249,0.030  
10,19.662,rs2026628,0.024  
10,19.696,rs12358653,0.022  
10,19.702,rs2387595,0.022  
10,19.723,rs10444205,0.022  
10,19.739,rs1327689,0.020  
10,19.754,rs7912136,0.018  
10,19.810,rs2119984,0.010  
10,19.820,rs1992495,0.010  
10,19.830,rs3763958,0.010  
10,19.865,rs413721,0.009  
10,19.916,rs894453,0.009  
10,19.939,rs2439911,0.008  
10,20.084,rs10905035,0.004  
10,20.187,rs7081563,0.002  
10,20.200,rs11254854,0.002  
10,20.240,rs2486884,0.002  
10,20.254,rs9423753,0.003  
10,20.286,rs2501683,0.001  
10,20.322,rs11254889,0.001  
10,20.333,rs2490696,0.002  
10,20.377,rs946785,0.001  
10,20.404,rs10905076,0.001  
10,20.410,rs12415542,0.000  
10,20.462,rs1544156,-0.000  
10,20.478,rs11254937,-0.000  
10,20.550,rs11254958,0.000  
10,20.599,rs12357990,0.000  
10,20.683,rs6602225,-0.000  
10,20.730,rs10437543,-0.000

10,20.777,rs755647,-0.000  
10,20.791,rs2762567,-0.001  
10,20.869,rs2497439,-0.006  
10,20.950,rs2692796,-0.023  
10,21.043,rs10905129,-0.017  
10,21.050,rs13376827,-0.018  
10,21.111,rs6602234,-0.023  
10,21.152,rs7101021,-0.026  
10,21.154,rs12411681,-0.026  
10,21.207,rs1409877,-0.029  
10,21.313,rs4083552,-0.029  
10,21.395,rs12773344,-0.038  
10,21.404,rs2253805,-0.039  
10,21.505,rs873930,-0.045  
10,21.560,rs17136510,-0.044  
10,21.590,rs2050352,-0.043  
10,21.643,rs3824658,-0.035  
10,21.670,rs10905190,-0.036  
10,21.698,rs871049,-0.041  
10,21.723,rs10752113,-0.058  
10,21.735,rs7093342,-0.089  
10,21.736,rs1931901,-0.093  
10,21.814,rs11255267,-0.045  
10,21.823,rs7094085,-0.043  
10,21.861,rs7897216,-0.045  
10,21.994,rs7907897,-0.045  
10,22.019,rs3736968,-0.045  
10,22.023,rs12761309,-0.045  
10,22.196,rs6602275,-0.045  
10,22.205,rs10905240,-0.045  
10,22.390,rs407644,-0.052  
10,22.462,rs768166,-0.041  
10,22.497,rs418704,-0.044  
10,22.529,rs578268,-0.052  
10,22.534,rs10795588,-0.054  
10,22.596,rs477461,-0.044  
10,22.599,rs434645,-0.045  
10,22.607,rs379568,-0.044  
10,22.630,rs1244159,-0.041  
10,22.638,rs1514232,-0.042  
10,22.659,rs1149908,-0.042  
10,22.718,rs2798832,-0.062  
10,22.745,rs2664904,-0.071  
10,22.839,rs10905315,-0.076  
10,22.861,rs1416566,-0.076  
10,23.053,rs10795608,-0.113  
10,23.061,rs11599385,-0.116  
10,23.158,rs10795618,-0.140  
10,23.235,rs10508350,-0.155  
10,23.251,rs2993391,-0.155  
10,23.265,rs11814860,-0.156  
10,23.336,rs9783189,-0.171  
10,23.407,rs2935669,-0.206  
10,23.418,rs2787136,-0.211  
10,23.434,rs2787138,-0.224  
10,23.440,rs2787141,-0.228  
10,23.482,rs1361153,-0.199  
10,23.503,rs2454062,-0.183  
10,23.714,rs10795645,-0.130  
10,23.774,rs11255728,-0.130  
10,23.901,rs4747803,-0.128



10,23.942,rs17144046,-0.114  
10,23.997,rs10905409,-0.100  
10,24.110,rs6602329,-0.105  
10,24.137,rs4584486,-0.105  
10,24.341,rs1537603,-0.118  
10,24.580,rs10752149,-0.131  
10,24.869,rs2025758,-0.115  
10,24.930,rs1018729,-0.146  
10,24.960,rs1243413,-0.156  
10,24.977,rs1243403,-0.151  
10,25.084,rs827637,-0.138  
10,25.401,rs961945,-0.101  
10,25.459,rs1149926,-0.103  
10,25.501,rs1242976,-0.105  
10,25.572,rs12248193,-0.114  
10,25.577,rs1149978,-0.114  
10,25.807,rs4749872,-0.123  
10,25.964,rs10508393,-0.120  
10,26.004,rs12249391,-0.122  
10,26.116,rs768365,-0.114  
10,26.263,rs10752172,-0.105  
10,26.553,rs1538608,-0.103  
10,26.592,rs1339678,-0.102  
10,26.748,rs6602387,-0.099  
10,26.860,rs2762637,-0.079  
10,26.935,rs2657513,-0.075  
10,27.015,rs2398121,-0.071  
10,27.036,rs11813494,-0.070  
10,27.047,rs927507,-0.068  
10,27.112,rs7083994,-0.066  
10,27.135,rs1570411,-0.067  
10,27.151,rs11256530,-0.064  
10,27.155,rs1885740,-0.060  
10,27.206,rs914987,-0.051  
10,27.366,rs4747852,-0.026  
10,27.439,rs7896031,-0.019  
10,27.448,rs10508403,-0.019  
10,27.516,rs1891399,-0.016  
10,27.661,rs1924507,-0.013  
10,27.696,rs4747860,-0.010  
10,27.714,rs2247652,-0.014  
10,27.731,rs2252120,-0.020  
10,27.746,rs10905731,-0.027  
10,27.774,rs10752197,-0.039  
10,27.790,rs1324317,-0.034  
10,27.790,rs7086168,-0.025  
10,27.791,rs3847420,-0.034  
10,27.798,rs3740194,-0.037  
10,27.800,rs2653514,-0.037  
10,27.881,rs4747900,-0.036  
10,27.938,rs2279809,-0.040  
10,28.016,rs4114417,-0.066  
10,28.063,rs7901534,-0.068  
10,28.069,rs12254063,-0.065  
10,28.113,rs2379113,-0.048  
10,28.141,rs3847437,-0.045  
10,28.187,rs2499902,-0.038  
10,28.227,rs1530375,-0.040  
10,28.428,rs10905969,-0.052  
10,28.533,rs754426,-0.062  
10,28.650,rs7101132,-0.071

10,28.674,rs10905983,-0.074  
10,28.683,rs11257215,-0.075  
10,28.741,rs10508428,-0.109  
10,28.839,rs10795879,-0.073  
10,28.949,rs2131265,-0.089  
10,29.016,rs942531,-0.084  
10,29.074,rs7893993,-0.061  
10,29.229,rs11257408,-0.050  
10,29.246,rs10795911,-0.052  
10,29.305,rs7921794,-0.065  
10,29.496,rs10795919,-0.044  
10,29.828,rs2399786,-0.043  
10,29.904,rs4747968,-0.045  
10,30.049,rs10906115,-0.045  
10,30.083,rs10752261,-0.046  
10,30.112,rs2096396,-0.050  
10,30.161,rs12251539,-0.052  
10,30.170,rs10906128,-0.052  
10,30.213,rs2997063,-0.081  
10,30.306,rs4451621,-0.100  
10,30.343,rs12254030,-0.109  
10,30.345,rs1574114,-0.109  
10,30.387,rs1111056,-0.111  
10,30.433,rs11257794,-0.088  
10,30.437,rs2768451,-0.086  
10,30.439,rs11596121,-0.086  
10,30.453,rs1108131,-0.087  
10,30.543,rs7097560,-0.123  
10,30.608,rs2815646,-0.143  
10,30.636,rs10906164,-0.140  
10,30.642,rs1126368,-0.137  
10,30.656,rs2815633,-0.177  
10,30.667,rs2768340,-0.167  
10,30.698,rs1409961,-0.155  
10,30.738,rs2895527,-0.150  
10,30.750,rs2399880,-0.132  
10,30.755,rs9787460,-0.134  
10,30.845,rs10906189,-0.158  
10,30.992,rs10906210,-0.200  
10,31.038,rs723210,-0.211  
10,31.070,rs4750255,-0.188  
10,31.096,rs2493765,-0.161  
10,31.142,rs2161365,-0.154  
10,31.149,rs1644426,-0.149  
10,31.167,rs2431626,-0.148  
10,31.178,rs2431621,-0.148  
10,31.286,rs17152417,-0.144  
10,31.382,rs10795995,-0.136  
10,31.675,rs17501439,-0.127  
10,31.680,rs281851,-0.127  
10,31.709,rs1888662,-0.133  
10,31.711,rs17152523,-0.133  
10,31.773,rs2580887,-0.145  
10,31.779,rs749062,-0.147  
10,31.785,rs10508452,-0.151  
10,31.872,rs11258111,-0.175  
10,31.920,rs7921121,-0.178  
10,31.964,rs565850,-0.174  
10,32.010,rs4409728,-0.170  
10,32.015,rs10796006,-0.172  
10,32.076,rs609445,-0.160

10,32.086,rs10906289,-0.163  
10,32.233,rs7921853,-0.149  
10,32.242,rs1561570,-0.127  
10,32.284,rs825411,-0.113  
10,32.480,rs2274108,-0.054  
10,32.507,rs10906320,-0.046  
10,32.529,rs11258250,-0.042  
10,32.566,rs727518,-0.034  
10,32.607,rs3829925,-0.020  
10,32.620,rs10906326,-0.018  
10,32.622,rs2399957,-0.018  
10,32.636,rs2025450,-0.018  
10,32.664,rs472806,-0.018  
10,32.745,rs4750340,-0.019  
10,32.985,rs10906357,-0.007  
10,33.034,rs1556992,-0.006  
10,33.072,rs7087392,-0.005  
10,33.092,rs1414397,-0.005  
10,33.304,rs4237432,-0.002  
10,33.396,rs2251555,-0.001  
10,33.452,rs11819227,-0.001  
10,33.466,rs10906399,-0.001  
10,33.614,rs6602667,-0.002  
10,33.754,rs4750390,-0.004  
10,33.775,rs10508463,-0.003  
10,33.829,rs943099,-0.001  
10,33.845,rs7893899,-0.004  
10,33.870,rs3814667,-0.004  
10,33.895,rs9633782,-0.005  
10,33.896,rs10906460,-0.005  
10,33.923,rs4748054,-0.012  
10,33.933,rs7910196,-0.012  
10,33.953,rs10796127,-0.011  
10,33.967,rs3995590,-0.010  
10,33.995,rs10906498,-0.006  
10,34.007,rs11258656,-0.009  
10,34.025,rs7900034,-0.007  
10,34.215,rs751498,-0.006  
10,34.287,rs3235,-0.006  
10,34.373,rs7904694,-0.005  
10,34.400,rs1026580,-0.005  
10,34.433,rs10906550,-0.005  
10,34.479,rs2447027,-0.007  
10,34.489,rs2457861,-0.007  
10,34.689,rs2447015,-0.000  
10,34.798,rs11258834,-0.000  
10,34.884,rs11818968,0.000  
10,35.119,rs11258894,0.009  
10,35.243,rs11258918,0.012  
10,35.486,rs1218385,0.011  
10,35.575,rs1218343,0.012  
10,35.703,rs1218406,0.013  
10,35.760,rs7077526,0.012  
10,35.812,rs11259027,0.010  
10,35.815,rs7083480,0.010  
10,35.830,rs11819533,0.010  
10,35.847,rs7899569,0.011  
10,35.869,rs679295,0.010  
10,35.896,rs672589,0.012  
10,35.923,rs590830,0.011  
10,35.937,rs11259069,0.011

10,36.000,rs10906675,0.013  
10,36.281,rs11259186,0.019  
10,36.285,rs1409392,0.019  
10,36.285,rs17155499,0.020  
10,36.287,rs749232,0.027  
10,36.287,rs1409390,0.027  
10,36.293,rs717069,0.027  
10,36.303,rs3740114,0.028  
10,36.304,rs7903263,0.026  
10,36.304,rs10508481,0.023  
10,36.308,rs10906742,0.017  
10,36.310,rs12767375,0.016  
10,36.315,rs2601736,0.019  
10,36.324,rs2601751,0.025  
10,36.328,rs7092449,0.026  
10,36.332,rs1974068,0.027  
10,36.333,rs11259333,0.027  
10,36.334,rs927935,0.027  
10,36.339,rs2688848,0.014  
10,36.340,rs7091494,0.013  
10,36.346,rs7094179,0.013  
10,36.365,rs12572872,0.015  
10,36.376,rs1592159,0.015  
10,36.382,rs4276994,0.017  
10,36.394,rs10906803,0.020  
10,36.400,rs1935391,0.022  
10,36.403,rs17156272,0.023  
10,36.407,rs1041158,0.023  
10,36.419,rs12250830,0.023  
10,36.421,rs10737093,0.023  
10,36.428,rs4750597,0.023  
10,36.459,rs7072433,0.019  
10,36.473,rs10906855,0.018  
10,36.479,rs10906857,0.017  
10,36.591,rs11816253,0.025  
10,36.625,rs2138929,0.025  
10,36.882,rs4750628,0.025  
10,37.116,rs7079961,0.027  
10,37.205,rs17156739,0.028  
10,37.235,rs10508486,0.028  
10,37.370,rs11818881,0.035  
10,37.383,rs7075597,0.034  
10,37.425,rs11259736,0.032  
10,37.486,rs9333185,0.031  
10,37.572,rs9333156,0.029  
10,37.711,rs9333114,0.026  
10,37.739,rs6602051,0.025  
10,37.771,rs9333092,0.023  
10,37.886,rs1934937,0.017  
10,37.994,rs11253637,0.016  
10,38.111,rs10904629,0.016  
10,38.350,rs10752030,0.019  
10,38.448,rs2354501,0.020  
10,38.554,rs7079379,0.016  
10,38.615,rs4747256,0.014  
10,38.934,rs2994301,0.015  
10,39.209,rs3858179,0.016  
10,39.333,rs10508506,0.014  
10,39.550,rs4748282,0.008  
10,39.663,rs17138545,0.004  
10,39.671,rs12774017,0.004

10,39.860,rs10904747,0.001  
10,39.964,rs7909832,0.000  
10,39.979,rs10904764,0.000  
10,40.040,rs12221081,0.000  
10,40.107,rs11254119,0.003  
10,40.113,rs11254123,0.004  
10,40.137,rs7088676,0.012  
10,40.143,rs7088378,0.009  
10,40.145,rs3847362,0.008  
10,40.164,rs7913448,0.011  
10,40.230,rs11812463,0.018  
10,40.250,rs7893556,0.022  
10,40.278,rs4748319,0.022  
10,40.342,rs17156937,0.023  
10,40.404,rs11254190,0.021  
10,40.473,rs3808925,0.019  
10,40.620,rs1801241,0.016  
10,40.695,rs780806,0.014  
10,40.801,rs11814420,0.015  
10,40.899,rs7072049,0.014  
10,40.921,rs1276711,0.013  
10,40.973,rs12246329,0.012  
10,40.986,rs7897550,0.011  
10,40.994,rs17431426,0.005  
10,40.995,rs12146414,0.005  
10,40.995,rs4525114,0.005  
10,41.089,rs1907360,0.001  
10,41.140,rs7905349,0.001  
10,41.184,rs10795445,0.001  
10,41.243,rs7916688,0.001  
10,41.244,rs932640,0.001  
10,41.306,rs6602180,0.001  
10,41.644,rs359285,0.002  
10,41.694,rs10904927,0.003  
10,41.758,rs359311,0.002  
10,41.848,rs4561106,0.004  
10,41.937,rs9423961,0.005  
10,41.940,rs12246926,0.005  
10,41.956,rs7075034,0.005  
10,41.971,rs7074210,0.002  
10,41.990,rs9787557,0.001  
10,42.008,rs4748380,0.001  
10,42.009,rs17448411,0.001  
10,42.037,rs7904413,-0.000  
10,42.057,rs2357285,-0.000  
10,42.114,rs17141430,-0.000  
10,42.198,rs2688791,-0.000  
10,42.205,rs12221,-0.000  
10,42.228,rs1925554,-0.000  
10,42.834,rs10508556,0.003  
10,42.851,rs7893618,0.004  
10,42.905,rs7920075,0.014  
10,42.941,rs1935499,0.017  
10,42.948,rs6415964,0.018  
10,42.966,rs10828244,0.021  
10,43.023,rs11012829,0.035  
10,43.056,rs1624525,0.048  
10,43.121,rs1757235,0.070  
10,43.127,rs11013137,0.070  
10,43.154,rs10828399,0.084  
10,43.174,rs7072759,0.077

10,43.233,rs9645525,0.052  
10,43.298,rs7078741,0.046  
10,43.310,rs12258178,0.045  
10,43.322,rs7477742,0.045  
10,43.331,rs10828662,0.044  
10,43.392,rs11014358,0.028  
10,43.484,rs8181477,0.026  
10,43.501,rs11014511,0.027  
10,43.514,rs12257556,0.029  
10,43.658,rs6482515,0.026  
10,43.860,rs1650,0.024  
10,44.261,rs10827035,0.022  
10,44.295,rs10763883,0.022  
10,44.404,rs1889513,0.021  
10,44.504,rs2496096,0.020  
10,44.510,rs7894610,0.020  
10,44.557,rs7094477,0.018  
10,44.586,rs12259974,0.011  
10,44.600,rs1332926,0.008  
10,44.634,rs7076844,0.007  
10,44.662,rs11010520,0.007  
10,44.784,rs12256082,0.012  
10,44.805,rs12775805,0.012  
10,44.810,rs7924250,0.012  
10,44.854,rs10508593,0.010  
10,44.860,rs1326242,0.010  
10,44.866,rs4747386,0.010  
10,44.899,rs2038912,0.007  
10,44.909,rs927827,0.008  
10,44.929,rs6482072,0.012  
10,44.943,rs10047272,0.012  
10,44.953,rs7079519,0.013  
10,44.965,rs7921016,0.014  
10,44.998,rs10827940,0.016  
10,45.018,rs12264569,0.017  
10,45.038,rs10458694,0.018  
10,45.099,rs7895512,0.024  
10,45.146,rs2778962,0.026  
10,45.181,rs6482112,0.033  
10,45.194,rs7070298,0.037  
10,45.206,rs1154689,0.039  
10,45.294,rs1416802,0.043  
10,45.358,rs7099358,0.049  
10,45.381,rs2359536,0.048  
10,45.396,rs1925533,0.048  
10,45.437,rs9645521,0.049  
10,45.476,rs11012310,0.049  
10,45.486,rs2765839,0.049  
10,45.607,rs952738,0.060  
10,45.625,rs2153446,0.056  
10,45.641,rs10508637,0.052  
10,45.654,rs11595730,0.060  
10,45.661,rs597837,0.065  
10,45.669,rs661924,0.070  
10,45.697,rs1440295,0.058  
10,45.720,rs313788,0.036  
10,45.766,rs1527042,0.020  
10,45.778,rs7099403,0.018  
10,45.815,rs10828224,0.011  
10,45.845,rs12358291,0.010  
10,45.847,rs11012639,0.010

10,45.900,rs12413399,0.013  
10,45.906,rs3858205,0.013  
10,46.224,rs11012847,0.021  
10,46.245,rs16922014,0.025  
10,46.385,rs3793753,0.061  
10,46.414,rs11013086,0.067  
10,46.420,rs1891877,0.068  
10,46.450,rs7918487,0.069  
10,46.580,rs12266732,0.073  
10,46.611,rs10828431,0.074  
10,46.657,rs10734046,0.081  
10,46.791,rs10828463,0.095  
10,47.108,rs11812868,0.076  
10,47.344,rs4748922,0.085  
10,47.347,rs7101307,0.085  
10,47.350,rs2366596,0.085  
10,47.357,rs11013842,0.083  
10,47.394,rs2067701,0.074  
10,47.418,rs12262912,0.068  
10,47.477,rs16924302,0.057  
10,47.544,rs11013944,0.056  
10,47.560,rs954729,0.054  
10,47.713,rs1543740,0.049  
10,47.798,rs373648,0.037  
10,47.823,rs387690,0.045  
10,47.851,rs11014020,0.043  
10,47.895,rs11014033,0.036  
10,47.896,rs17384657,0.036  
10,47.902,rs11014034,0.033  
10,47.915,rs220346,0.013  
10,47.940,rs11014059,0.003  
10,47.950,rs10828638,0.004  
10,48.134,rs7896427,0.010  
10,48.314,rs1556401,0.029  
10,48.329,rs7915144,0.029  
10,48.432,rs2366915,0.026  
10,48.552,rs10508674,0.041  
10,48.629,rs1537170,0.049  
10,48.703,rs10764472,0.058  
10,48.721,rs2067887,0.065  
10,48.734,rs10508679,0.065  
10,48.749,rs10828664,0.072  
10,48.767,rs11014147,0.070  
10,48.780,rs2265265,0.104  
10,48.839,rs10828681,0.114  
10,48.895,rs12219181,0.109  
10,48.949,rs1537900,0.087  
10,48.980,rs10741067,0.063  
10,49.009,rs1971470,0.052  
10,49.023,rs7916535,0.063  
10,49.045,rs7908585,0.061  
10,49.081,rs274288,0.056  
10,49.312,rs2491198,0.019  
10,49.342,rs824147,0.005  
10,49.395,rs12265226,0.006  
10,49.526,rs1329255,0.011  
10,49.564,rs11591807,0.012  
10,49.617,rs7911256,0.017  
10,49.777,rs7091819,0.028  
10,49.781,rs2442826,0.028  
10,49.809,rs2442871,0.027

10,49.814,rs872974,0.026  
10,49.825,rs2442865,0.022  
10,49.877,rs2437408,0.008  
10,49.908,rs7071770,0.009  
10,50.004,rs11014866,0.015  
10,50.036,rs3824700,0.015  
10,50.211,rs11015040,0.030  
10,50.238,rs7073826,0.016  
10,50.247,rs3006843,0.014  
10,50.318,rs4749118,0.012  
10,50.570,rs3006835,0.008  
10,50.624,rs7085145,0.006  
10,50.644,rs786715,0.006  
10,50.677,rs10508719,0.006  
10,50.719,rs787033,0.005  
10,50.734,rs7096662,0.004  
10,50.736,rs12783959,0.004  
10,50.778,rs787050,0.002  
10,50.828,rs787016,0.005  
10,50.881,rs7074426,0.004  
10,50.948,rs1853682,0.006  
10,51.031,rs11015249,0.008  
10,51.075,rs17747622,0.008  
10,51.114,rs17816509,0.008  
10,51.242,rs4287252,0.007  
10,51.299,rs2797930,0.006  
10,51.568,rs10764687,0.002  
10,51.589,rs7918793,0.002  
10,51.601,rs10764690,0.002  
10,51.662,rs2483499,0.002  
10,51.747,rs237568,0.002  
10,51.752,rs118917,0.002  
10,51.847,rs10829268,0.002  
10,51.880,rs1494209,0.003  
10,51.887,rs10829284,0.002  
10,51.906,rs2815523,0.000  
10,52.023,rs10826354,0.001  
10,52.070,rs7893462,0.001  
10,52.215,rs7081654,0.001  
10,52.667,rs786398,-0.000  
10,52.830,rs1249328,-0.001  
10,52.864,rs703027,-0.002  
10,52.920,rs1776099,-0.006  
10,52.923,rs7087410,-0.007  
10,52.931,rs9416795,-0.007  
10,52.934,rs2368327,-0.007  
10,52.944,rs11007106,-0.008  
10,52.959,rs16928895,-0.010  
10,52.978,rs2153299,-0.012  
10,53.013,rs2807741,-0.012  
10,53.509,rs628590,-0.027  
10,53.649,rs12569910,-0.038  
10,53.672,rs4749338,-0.030  
10,53.738,rs1248994,-0.033  
10,53.783,rs11007230,-0.036  
10,53.812,rs1265786,-0.039  
10,53.974,rs787346,-0.065  
10,54.005,rs7078596,-0.069  
10,54.096,rs7901873,-0.073  
10,54.139,rs12256310,-0.072  
10,54.169,rs1773881,-0.071



10,54.170,rs1691935,-0.071  
10,54.248,rs10826541,-0.070  
10,54.361,rs10508741,-0.069  
10,54.361,rs788065,-0.069  
10,54.501,rs1773877,-0.084  
10,54.546,rs2783425,-0.085  
10,54.558,rs788053,-0.085  
10,54.688,rs534145,-0.086  
10,54.726,rs7069400,-0.088  
10,54.785,rs573036,-0.098  
10,54.834,rs2783596,-0.107  
10,54.837,rs10508742,-0.108  
10,54.875,rs533844,-0.120  
10,54.930,rs571214,-0.147  
10,54.957,rs478463,-0.159  
10,55.005,rs576692,-0.180  
10,55.082,rs2532774,-0.180  
10,55.150,rs6481572,-0.202  
10,55.173,rs2532772,-0.208  
10,55.355,rs10763707,-0.229  
10,55.483,rs7076385,-0.234  
10,55.650,rs789920,-0.226  
10,55.687,rs7094201,-0.225  
10,55.923,rs7096453,-0.241  
10,55.924,rs17756919,-0.242  
10,55.925,rs1328326,-0.237  
10,55.926,rs4083633,-0.261  
10,55.926,rs2505903,-0.289  
10,55.926,rs1247442,-0.305  
10,55.927,rs1247459,-0.325  
10,55.929,rs1624281,-0.434  
10,55.929,rs1247087,-0.406  
10,55.929,rs7101204,-0.398  
10,55.929,rs1927456,-0.390  
10,55.929,rs11007716,-0.372  
10,55.939,rs1927461,-0.392  
10,56.069,rs1927443,-0.320  
10,56.148,rs2986971,-0.317  
10,56.166,rs7070647,-0.316  
10,56.195,rs6481636,-0.348  
10,56.235,rs11593046,-0.351  
10,56.471,rs3006564,-0.372  
10,56.632,rs2487930,-0.311  
10,56.641,rs11007823,-0.305  
10,56.730,rs2795622,-0.221  
10,56.737,rs16930868,-0.218  
10,56.924,rs2014144,-0.137  
10,57.022,rs2478833,-0.135  
10,57.275,rs11007909,-0.153  
10,57.327,rs3006509,-0.156  
10,57.454,rs1977583,-0.137  
10,57.712,rs1047991,-0.142  
10,57.844,rs1041677,-0.145  
10,57.867,rs12572092,-0.146  
10,57.874,rs2244677,-0.146  
10,58.037,rs1042058,-0.144  
10,58.215,rs603805,-0.135  
10,58.239,rs3124199,-0.134  
10,58.369,rs6481694,-0.112  
10,58.374,rs3105630,-0.112  
10,58.414,rs7067585,-0.111

10,58.442,rs906236,-0.110  
10,58.536,rs3123276,-0.099  
10,58.601,rs661893,-0.094  
10,58.836,rs7097635,-0.057  
10,59.020,rs4749600,-0.062  
10,59.068,rs2047142,-0.064  
10,59.127,rs903270,-0.067  
10,59.148,rs12247732,-0.066  
10,59.236,rs11008258,-0.065  
10,59.378,rs1538955,-0.062  
10,59.430,rs2994652,-0.062  
10,59.472,rs2994613,-0.061  
10,59.583,rs1690624,-0.057  
10,59.704,rs1624116,-0.058  
10,59.740,rs11008410,-0.056  
10,59.775,rs2505731,-0.054  
10,59.945,rs12781751,-0.044  
10,59.976,rs1418635,-0.051  
10,59.983,rs2277251,-0.050  
10,60.035,rs2808079,-0.054  
10,60.093,rs211315,-0.054  
10,60.095,rs1251370,-0.054  
10,60.096,rs1251379,-0.055  
10,60.107,rs425411,-0.058  
10,60.114,rs2998089,-0.060  
10,60.124,rs2998036,-0.062  
10,60.139,rs1080543,-0.062  
10,60.188,rs2490527,-0.068  
10,60.363,rs1187078,-0.043  
10,60.418,rs16934084,-0.037  
10,60.424,rs2506128,-0.035  
10,60.438,rs2474714,-0.033  
10,60.453,rs11593943,-0.029  
10,60.456,rs2073320,-0.028  
10,60.461,rs1952983,-0.028  
10,60.481,rs2065364,-0.018  
10,60.517,rs7074947,-0.020  
10,60.522,rs16934411,-0.021  
10,60.530,rs1320485,-0.021  
10,60.531,rs10740870,-0.014  
10,60.539,rs10763930,-0.013  
10,60.541,rs2776947,-0.013  
10,60.589,rs2804904,-0.012  
10,60.609,rs7903736,-0.013  
10,60.618,rs12569831,-0.015  
10,60.635,rs4623845,-0.019  
10,60.650,rs2601768,-0.021  
10,60.717,rs1902403,-0.009  
10,60.724,rs10827274,-0.007  
10,60.739,rs7908016,-0.007  
10,60.805,rs11009501,-0.002  
10,60.814,rs7096272,-0.002  
10,60.874,rs2777525,-0.002  
10,60.897,rs2812661,-0.002  
10,60.940,rs7905447,-0.004  
10,60.944,rs876644,-0.004  
10,60.953,rs1740721,-0.006  
10,60.974,rs10827315,-0.014  
10,60.982,rs7091513,-0.016  
10,61.003,rs1617306,-0.014  
10,61.007,rs11009607,-0.014

10,61.013,rs224714,-0.014  
10,61.043,rs161423,-0.011  
10,61.096,rs7893965,-0.007  
10,61.114,rs7076988,-0.007  
10,61.177,rs1660630,-0.007  
10,61.194,rs678188,-0.003  
10,61.302,rs2384211,-0.003  
10,61.350,rs4113505,-0.004  
10,61.593,rs10508810,-0.005  
10,61.692,rs4934517,-0.006  
10,61.716,rs7915550,-0.008  
10,61.748,rs4469833,-0.011  
10,61.768,rs10764014,-0.011  
10,62.101,rs2504361,-0.050  
10,62.148,rs4934750,-0.055  
10,62.287,rs2474755,-0.034  
10,62.296,rs1895119,-0.034  
10,62.330,rs596642,-0.036  
10,62.361,rs708419,-0.033  
10,62.432,rs3851074,-0.054  
10,62.531,rs11010532,-0.065  
10,62.531,rs2384564,-0.065  
10,62.556,rs7092191,-0.068  
10,62.587,rs315620,-0.069  
10,62.625,rs1219604,-0.068  
10,62.692,rs2800092,-0.080  
10,62.700,rs16936947,-0.081  
10,62.713,rs17615892,-0.080  
10,62.763,rs10827637,-0.067  
10,62.788,rs4934813,-0.079  
10,62.788,rs16936996,-0.079  
10,62.904,rs2483025,-0.102  
10,62.958,rs2505603,-0.113  
10,62.971,rs2990536,-0.116  
10,63.101,rs2027129,-0.128  
10,63.122,rs10508853,-0.129  
10,63.152,rs2490846,-0.130  
10,63.334,rs7904132,-0.125  
10,63.362,rs2505171,-0.124  
10,63.722,rs2253294,-0.119  
10,63.820,rs11011225,-0.121  
10,64.308,rs210271,-0.090  
10,64.361,rs10900250,-0.083  
10,64.396,rs158377,-0.079  
10,64.595,rs3121327,-0.056  
10,64.659,rs10900291,-0.053  
10,64.700,rs2565190,-0.053  
10,64.749,rs3026737,-0.055  
10,64.801,rs2505556,-0.063  
10,64.876,rs2503857,-0.054  
10,64.906,rs2503876,-0.052  
10,64.958,rs7070769,-0.049  
10,65.064,rs7915241,-0.046  
10,65.092,rs6593362,-0.045  
10,65.098,rs10899838,-0.045  
10,65.102,rs3123678,-0.057  
10,65.224,rs7922745,-0.051  
10,65.271,rs10899933,-0.049  
10,65.282,rs7895918,-0.049  
10,65.346,rs4948591,-0.045  
10,65.391,rs268319,-0.040

10,65.468,rs1704224,-0.033  
10,65.469,rs17155478,-0.033  
10,65.485,rs11238926,-0.032  
10,65.504,rs677465,-0.030  
10,65.567,rs1144484,-0.026  
10,65.568,rs7918046,-0.026  
10,65.591,rs1065297,-0.037  
10,65.609,rs1779384,-0.040  
10,65.681,rs4948636,-0.045  
10,65.701,rs7072122,-0.046  
10,65.708,rs7069446,-0.046  
10,65.722,rs10900072,-0.044  
10,65.771,rs7922897,-0.037  
10,65.797,rs999473,-0.035  
10,65.849,rs1408815,-0.028  
10,65.885,rs1963172,-0.024  
10,65.887,rs7911712,-0.024  
10,65.888,rs11239253,-0.024  
10,65.893,rs4948916,-0.023  
10,65.913,rs6593445,-0.020  
10,65.936,rs7909074,-0.043  
10,65.967,rs11597898,-0.052  
10,65.977,rs870204,-0.055  
10,65.986,rs3740098,-0.055  
10,66.039,rs12358699,-0.054  
10,66.128,rs7074191,-0.054  
10,66.168,rs1122801,-0.066  
10,66.222,rs7915972,-0.076  
10,66.397,rs4418752,-0.047  
10,66.400,rs10751384,-0.047  
10,67.440,rs11596854,-0.051  
10,67.842,rs4342964,-0.097  
10,67.848,rs17173564,-0.097  
10,67.856,rs7920146,-0.094  
10,67.869,rs4922519,-0.090  
10,67.913,rs762454,-0.074  
10,67.923,rs2853840,-0.072  
10,67.950,rs9421743,-0.070  
10,67.966,rs7895237,-0.069  
10,67.992,rs4922536,-0.062  
10,68.021,rs896570,-0.054  
10,68.046,rs7096703,-0.052  
10,68.052,rs2790937,-0.052  
10,68.065,rs998773,-0.052  
10,68.611,rs7898026,-0.057  
10,68.704,rs10508902,-0.057  
10,68.728,rs7093726,-0.057  
10,68.785,rs747532,-0.056  
10,68.810,rs877642,-0.046  
10,68.814,rs4320911,-0.044  
10,68.827,rs7915707,-0.036  
10,68.846,rs1822861,-0.056  
10,68.874,rs10219012,-0.067  
10,68.902,rs10857619,-0.074  
10,68.920,rs10508904,-0.068  
10,68.923,rs7072606,-0.068  
10,68.924,rs12416600,-0.068  
10,68.931,rs4838645,-0.069  
10,69.001,rs12248218,-0.084  
10,69.059,rs7098403,-0.092  
10,69.066,rs1913517,-0.093

10,69.078,rs17782114,-0.092  
10,69.081,rs2671705,-0.092  
10,69.127,rs7086917,-0.086  
10,69.240,rs10218995,-0.091  
10,69.270,rs10857437,-0.090  
10,69.304,rs2377991,-0.090  
10,69.322,rs2002392,-0.088  
10,69.324,rs4838470,-0.088  
10,69.325,rs11101062,-0.088  
10,69.339,rs12411581,-0.085  
10,69.359,rs6537521,-0.080  
10,69.367,rs6537523,-0.078  
10,69.367,rs2292200,-0.078  
10,69.417,rs3849153,-0.060  
10,69.458,rs10857488,-0.046  
10,69.473,rs7906303,-0.040  
10,69.544,rs11101168,-0.023  
10,69.550,rs1917804,-0.021  
10,69.567,rs4838392,-0.017  
10,69.571,rs17784350,-0.016  
10,69.582,rs8178992,-0.014  
10,69.624,rs6537552,-0.009  
10,69.917,rs2611512,-0.001  
10,69.942,rs10994675,0.000  
10,69.950,rs17720205,-0.001  
10,69.957,rs7085433,-0.003  
10,70.061,rs10824914,-0.015  
10,70.070,rs3964873,-0.010  
10,70.070,rs3011710,-0.003  
10,70.237,rs7895606,-0.005  
10,70.296,rs4317935,-0.007  
10,70.368,rs6479812,-0.012  
10,70.371,rs7914943,-0.012  
10,70.506,rs10822288,-0.026  
10,70.520,rs7893773,-0.025  
10,70.603,rs10490975,-0.022  
10,70.633,rs2043556,-0.022  
10,70.635,rs10490969,-0.022  
10,70.641,rs12261736,-0.022  
10,70.642,rs7898516,-0.022  
10,70.669,rs211083,-0.018  
10,70.690,rs1550718,-0.014  
10,70.695,rs1189320,-0.014  
10,70.712,rs293233,-0.015  
10,70.739,rs12248673,-0.014  
10,70.780,rs10762176,-0.012  
10,70.783,rs1926208,-0.012  
10,70.859,rs10823243,-0.012  
10,70.874,rs1922139,-0.012  
10,70.894,rs7915186,-0.012  
10,70.991,rs4568954,-0.015  
10,71.093,rs1937701,-0.035  
10,71.093,rs17549153,-0.035  
10,71.196,rs1937672,-0.056  
10,71.287,rs10740403,-0.076  
10,71.324,rs1904036,-0.076  
10,71.424,rs7901487,-0.063  
10,71.493,rs10824010,-0.049  
10,71.517,rs1904024,-0.050  
10,71.540,rs10762562,-0.039  
10,71.659,rs11001056,-0.031

10,71.666,rs10824201,-0.031  
10,71.681,rs955779,-0.030  
10,71.839,rs11001444,-0.021  
10,71.848,rs7916242,-0.021  
10,71.867,rs11815205,-0.019  
10,71.881,rs1896368,-0.019  
10,72.013,rs1194663,-0.024  
10,72.017,rs12769610,-0.024  
10,72.069,rs6480851,-0.029  
10,72.113,rs1194742,-0.032  
10,72.132,rs1441119,-0.034  
10,72.307,rs6480894,-0.059  
10,72.350,rs10824650,-0.045  
10,72.429,rs7071467,-0.061  
10,72.429,rs10762857,-0.061  
10,72.440,rs1160630,-0.064  
10,72.480,rs1000219,-0.080  
10,72.522,rs4597018,-0.092  
10,72.656,rs10824804,-0.086  
10,72.685,rs7918389,-0.083  
10,72.688,rs6480972,-0.083  
10,72.799,rs10824829,-0.060  
10,72.841,rs2222547,-0.072  
10,72.847,rs2204345,-0.073  
10,72.859,rs12267008,-0.080  
10,72.874,rs10824839,-0.089  
10,72.883,rs12218966,-0.090  
10,72.887,rs10824840,-0.092  
10,72.940,rs2384101,-0.123  
10,72.942,rs2384130,-0.121  
10,72.977,rs11003466,-0.133  
10,73.000,rs7901256,-0.131  
10,73.012,rs10762971,-0.126  
10,73.035,rs885507,-0.115  
10,73.049,rs12411335,-0.108  
10,73.053,rs1487469,-0.105  
10,73.059,rs1198114,-0.103  
10,73.087,rs445739,-0.104  
10,73.118,rs12256830,-0.115  
10,73.150,rs1954343,-0.127  
10,73.213,rs16913796,-0.119  
10,73.240,rs2610895,-0.106  
10,73.375,rs7095441,-0.080  
10,73.516,rs7893808,-0.065  
10,73.641,rs4592338,-0.053  
10,73.729,rs4935107,-0.045  
10,73.774,rs2891522,-0.042  
10,73.816,rs1930177,-0.041  
10,73.861,rs1930146,-0.044  
10,73.872,rs1758827,-0.050  
10,73.879,rs1930165,-0.054  
10,73.904,rs10825357,-0.051  
10,73.905,rs12777241,-0.051  
10,73.955,rs7913327,-0.051  
10,73.993,rs10825369,-0.052  
10,74.014,rs11004437,-0.046  
10,74.067,rs10763126,-0.033  
10,74.167,rs2384533,-0.036  
10,74.251,rs7085479,-0.033  
10,74.260,rs7913159,-0.029  
10,74.261,rs11004610,-0.020

10,74.285,rs4935126,-0.016  
10,74.392,rs11004654,-0.019  
10,74.564,rs16907003,-0.046  
10,74.582,rs2799610,-0.058  
10,74.601,rs2589444,-0.064  
10,74.611,rs2680312,-0.067  
10,74.634,rs12265891,-0.064  
10,74.684,rs16907126,-0.065  
10,74.701,rs10509029,-0.065  
10,74.706,rs12252515,-0.065  
10,74.719,rs2249500,-0.064  
10,74.846,rs1992821,-0.051  
10,74.891,rs10160121,-0.054  
10,74.940,rs1922135,-0.063  
10,74.972,rs2153136,-0.059  
10,75.011,rs9415372,-0.052  
10,75.084,rs11005328,-0.054  
10,75.147,rs7474843,-0.055  
10,75.212,rs10763419,-0.061  
10,75.271,rs7919353,-0.061  
10,75.279,rs16910074,-0.061  
10,75.392,rs2393230,-0.062  
10,75.450,rs7900471,-0.051  
10,75.455,rs2127615,-0.064  
10,75.515,rs6481286,-0.066  
10,75.559,rs2393261,-0.061  
10,75.566,rs2393368,-0.060  
10,75.602,rs7087313,-0.057  
10,75.626,rs7082286,-0.054  
10,75.717,rs7101032,-0.044  
10,75.739,rs2658618,-0.043  
10,75.762,rs10509084,-0.052  
10,75.781,rs11006023,-0.052  
10,75.884,rs6481383,-0.051  
10,75.900,rs2275442,-0.047  
10,75.954,rs10826176,-0.036  
10,75.963,rs12245545,-0.036  
10,75.968,rs16912233,-0.036  
10,75.985,rs7916849,-0.038  
10,76.046,rs1649048,-0.044  
10,76.070,rs7097457,-0.042  
10,76.079,rs2028205,-0.043  
10,76.160,rs11812567,-0.068  
10,76.180,rs4948550,-0.073  
10,76.191,rs7910260,-0.054  
10,76.220,rs10826248,-0.028  
10,76.257,rs282661,-0.023  
10,76.388,rs10826264,-0.018  
10,77.738,rs2436571,-0.028  
10,77.842,rs284598,-0.029  
10,77.857,rs4495850,-0.019  
10,77.998,rs11006495,-0.008  
10,78.095,rs1763895,-0.006  
10,78.135,rs10826322,-0.004  
10,78.236,rs1177697,-0.012  
10,78.260,rs1171627,-0.009  
10,78.266,rs1171617,-0.007  
10,78.380,rs7088886,-0.009  
10,78.607,rs10821659,-0.018  
10,78.616,rs9888034,-0.011  
10,78.635,rs7893313,-0.015

10,78.686,rs11599447,-0.020  
10,78.700,rs10994212,-0.022  
10,78.708,rs10740011,-0.023  
10,78.746,rs10509125,-0.021  
10,78.784,rs6479700,-0.015  
10,78.788,rs4948398,-0.015  
10,79.019,rs7898622,-0.011  
10,79.139,rs10821808,-0.009  
10,79.231,rs11817236,-0.013  
10,79.272,rs3213077,-0.015  
10,79.274,rs1060373,-0.015  
10,79.276,rs2448358,-0.015  
10,79.306,rs6479734,-0.027  
10,79.317,rs2893863,-0.030  
10,79.318,rs10821845,-0.030  
10,79.331,rs4948267,-0.029  
10,79.354,rs7898435,-0.033  
10,79.362,rs2893869,-0.034  
10,79.363,rs12252953,-0.034  
10,79.379,rs7913287,-0.033  
10,79.499,rs12262459,-0.051  
10,79.511,rs7087951,-0.053  
10,79.656,rs11596067,-0.048  
10,79.668,rs4643025,-0.048  
10,79.670,rs10994701,-0.048  
10,80.363,rs2448396,-0.051  
10,80.440,rs1444466,-0.052  
10,80.442,rs2675651,-0.066  
10,80.485,rs12784097,-0.067  
10,80.517,rs7901348,-0.069  
10,80.530,rs10821932,-0.070  
10,80.558,rs10740055,-0.075  
10,80.570,rs12249208,-0.081  
10,80.604,rs7922024,-0.102  
10,80.610,rs7894504,-0.105  
10,80.616,rs12413946,-0.106  
10,80.643,rs224126,-0.114  
10,80.667,rs224149,-0.117  
10,80.823,rs10995356,-0.106  
10,80.888,rs10509178,-0.100  
10,80.924,rs10822109,-0.093  
10,80.978,rs2842276,-0.093  
10,81.198,rs10995495,-0.099  
10,81.340,rs12246496,-0.105  
10,81.464,rs10822186,-0.111  
10,81.538,rs16918762,-0.104  
10,81.615,rs3912164,-0.098  
10,81.645,rs10761805,-0.106  
10,81.668,rs938036,-0.123  
10,81.698,rs2252578,-0.150  
10,81.739,rs2671490,-0.112  
10,81.766,rs2252686,-0.113  
10,81.909,rs10995850,-0.150  
10,81.954,rs12769215,-0.154  
10,82.096,rs10509208,-0.129  
10,82.102,rs12243555,-0.123  
10,82.150,rs10822321,-0.068  
10,82.152,rs10509211,-0.063  
10,82.154,rs1915637,-0.057  
10,82.156,rs2177023,-0.066  
10,82.191,rs10822370,-0.078



10,82.229,rs10822431,-0.063  
10,82.269,rs7073035,-0.049  
10,82.283,rs9415825,-0.039  
10,82.290,rs1948853,-0.047  
10,82.290,rs7909330,-0.047  
10,82.319,rs10996448,-0.067  
10,82.414,rs7923690,-0.058  
10,82.429,rs7073641,-0.058  
10,82.566,rs10509229,-0.059  
10,82.616,rs10509233,-0.063  
10,82.617,rs10509234,-0.063  
10,82.617,rs4746528,-0.063  
10,82.677,rs1904740,-0.087  
10,82.709,rs2924301,-0.100  
10,82.790,rs7908509,-0.106  
10,82.822,rs10996759,-0.109  
10,82.850,rs10740214,-0.109  
10,82.862,rs1670148,-0.106  
10,82.970,rs1903876,-0.080  
10,82.976,rs7903919,-0.079  
10,82.994,rs1942007,-0.076  
10,83.287,rs7912066,-0.054  
10,83.288,rs7923361,-0.054  
10,83.348,rs4297361,-0.047  
10,83.420,rs1948946,-0.032  
10,83.421,rs13376837,-0.032  
10,83.502,rs10509267,-0.030  
10,83.531,rs10997232,-0.018  
10,83.535,rs2660020,-0.018  
10,83.573,rs2605503,-0.016  
10,83.573,rs10997260,-0.016  
10,83.590,rs12248142,-0.014  
10,83.612,rs2394279,-0.011  
10,83.615,rs10822869,-0.011  
10,83.630,rs6480203,-0.008  
10,83.645,rs10509276,-0.004  
10,83.662,rs7083773,-0.004  
10,83.674,rs6480209,-0.003  
10,83.685,rs7084050,-0.002  
10,83.725,rs12218365,-0.001  
10,83.726,rs7095347,-0.001  
10,83.749,rs4237311,-0.003  
10,83.752,rs10997408,-0.003  
10,83.759,rs7902209,-0.003  
10,83.763,rs9414948,-0.003  
10,83.763,rs4746645,-0.003  
10,83.835,rs1925562,-0.001  
10,83.850,rs942788,-0.001  
10,83.850,rs16923867,-0.000  
10,83.861,rs9971243,-0.000  
10,83.910,rs1925585,0.000  
10,83.928,rs4745927,-0.001  
10,84.405,rs3125309,-0.005  
10,84.589,rs10997892,-0.005  
10,84.706,rs17456902,-0.005  
10,84.715,rs12221035,-0.002  
10,84.725,rs2673801,-0.001  
10,84.771,rs1673,-0.004  
10,84.787,rs7916697,-0.004  
10,85.092,rs1007042,-0.008  
10,85.409,rs2185653,-0.007

10,85.600,rs7903221,-0.005  
10,85.992,rs2998005,-0.001  
10,86.060,rs10509309,-0.003  
10,86.148,rs2805915,-0.001  
10,86.347,rs10998624,0.000  
10,86.463,rs4746826,0.000  
10,86.469,rs12221182,-0.001  
10,86.474,rs1983128,-0.001  
10,86.481,rs874556,-0.001  
10,86.499,rs7085830,-0.001  
10,86.539,rs2102339,-0.001  
10,86.635,rs10823333,-0.003  
10,86.638,rs10998700,-0.003  
10,86.641,rs2894081,-0.003  
10,86.643,rs7897621,-0.003  
10,86.715,rs7097078,-0.002  
10,86.736,rs12220752,-0.002  
10,86.750,rs906216,-0.002  
10,86.871,rs2084274,-0.002  
10,86.917,rs12244723,-0.002  
10,86.926,rs2278746,-0.002  
10,87.193,rs972570,-0.000  
10,87.260,rs1237105,0.000  
10,87.291,rs2812562,0.002  
10,87.317,rs190925,0.005  
10,87.383,rs7895043,0.007  
10,87.452,rs931028,0.005  
10,87.465,rs4746874,0.006  
10,87.565,rs2616076,0.009  
10,87.580,rs2812510,0.010  
10,87.587,rs7914685,0.010  
10,87.651,rs2812531,0.010  
10,87.698,rs2616133,0.011  
10,87.808,rs2642589,0.007  
10,87.848,rs2252324,0.006  
10,87.878,rs2642576,0.006  
10,87.954,rs17497293,0.004  
10,87.999,rs1227756,0.002  
10,88.005,rs1227759,0.002  
10,88.032,rs3998144,0.002  
10,88.045,rs10998997,0.001  
10,88.075,rs2395286,0.000  
10,88.077,rs2395280,0.000  
10,88.115,rs2763359,0.001  
10,88.151,rs7100913,-0.000  
10,88.158,rs2763366,-0.000  
10,88.324,rs3750776,0.000  
10,88.347,rs3847355,0.000  
10,88.664,rs10762337,0.000  
10,88.702,rs10823484,0.000  
10,88.707,rs2271696,0.000  
10,88.892,rs6480445,0.000  
10,89.015,rs7087773,0.000  
10,89.048,rs6480448,0.000  
10,89.110,rs7075666,0.000  
10,89.183,rs4747001,-0.000  
10,89.211,rs10823529,-0.000  
10,89.433,rs7072552,-0.012  
10,89.438,rs10762381,-0.013  
10,89.485,rs1106887,-0.025  
10,89.599,rs10740351,-0.021

10,89.635,rs4747042,-0.025  
10,89.785,rs3740447,-0.054  
10,89.789,rs10999385,-0.055  
10,89.826,rs10740354,-0.060  
10,89.914,rs2894125,-0.077  
10,89.927,rs1556616,-0.078  
10,90.125,rs826460,-0.094  
10,90.366,rs10823602,-0.085  
10,90.480,rs10762401,-0.079  
10,90.560,rs2253801,-0.069  
10,90.572,rs16927963,-0.065  
10,90.599,rs1538677,-0.054  
10,90.836,rs16928023,-0.047  
10,90.979,rs7917828,-0.043  
10,90.990,rs7096028,-0.040  
10,91.003,rs17612029,-0.036  
10,91.041,rs7095462,-0.042  
10,91.050,rs12415816,-0.042  
10,91.109,rs12764441,-0.042  
10,91.205,rs10999616,-0.040  
10,91.254,rs7074431,-0.038  
10,91.273,rs10999632,-0.036  
10,91.274,rs12244234,-0.036  
10,91.320,rs10762417,-0.044  
10,91.322,rs7100223,-0.044  
10,91.352,rs7077129,-0.048  
10,91.383,rs7097900,-0.054  
10,91.468,rs947364,-0.054  
10,91.482,rs12246465,-0.054  
10,91.484,rs10999695,-0.054  
10,92.212,rs4746080,-0.023  
10,92.500,rs11593534,-0.027  
10,92.538,rs703256,-0.039  
10,92.607,rs16928777,-0.033  
10,92.663,rs2394795,-0.032  
10,92.724,rs10999828,-0.054  
10,92.732,rs10999834,-0.060  
10,92.750,rs7901112,-0.075  
10,92.827,rs7917660,-0.061  
10,92.838,rs12783388,-0.064  
10,92.839,rs10999868,-0.064  
10,92.862,rs10823781,-0.087  
10,92.897,rs10999882,-0.100  
10,92.922,rs3998531,-0.106  
10,92.923,rs12766154,-0.106  
10,93.013,rs2394834,-0.093  
10,93.050,rs7087554,-0.092  
10,93.084,rs10509334,-0.085  
10,93.131,rs16929266,-0.043  
10,93.150,rs12248205,-0.031  
10,93.169,rs7919533,-0.034  
10,93.217,rs2394840,-0.035  
10,93.235,rs11000020,-0.035  
10,93.305,rs10823873,-0.027  
10,93.325,rs7071860,-0.027  
10,93.342,rs7086624,-0.028  
10,93.372,rs4148912,-0.027  
10,93.453,rs11000152,-0.015  
10,93.488,rs1245548,-0.014  
10,93.609,rs6480598,-0.019  
10,93.615,rs12267836,-0.019

10,93.662,rs10740396,-0.021  
10,93.732,rs11000266,-0.027  
10,93.995,rs2675671,-0.046  
10,94.001,rs11000828,-0.024  
10,94.002,rs7091248,-0.023  
10,94.247,rs12360087,-0.006  
10,94.325,rs2488089,-0.005  
10,94.516,rs7901279,-0.003  
10,94.519,rs7918887,-0.003  
10,94.547,rs3088142,-0.002  
10,94.646,rs2488696,-0.002  
10,94.656,rs6480779,-0.002  
10,94.886,rs7895659,-0.006  
10,94.914,rs4745785,-0.007  
10,95.351,rs11001530,-0.010  
10,95.388,rs10762685,-0.011  
10,95.417,rs11001545,-0.009  
10,95.427,rs2057436,-0.009  
10,95.487,rs16932734,-0.014  
10,95.597,rs10824350,-0.020  
10,95.660,rs4745806,-0.023  
10,96.633,rs241,-0.078  
10,96.667,rs7913345,-0.080  
10,96.879,rs2082415,-0.080  
10,96.900,rs7093668,-0.080  
10,96.904,rs2116829,-0.080  
10,96.943,rs4980117,-0.130  
10,96.963,rs2116833,-0.146  
10,96.982,rs7915877,-0.144  
10,96.991,rs999995,-0.172  
10,96.998,rs11597111,-0.175  
10,97.037,rs11001968,-0.196  
10,97.136,rs7076995,-0.244  
10,97.209,rs2574807,-0.229  
10,97.212,rs10824493,-0.230  
10,97.224,rs527458,-0.233  
10,97.242,rs11002068,-0.230  
10,97.300,rs577360,-0.219  
10,97.309,rs499437,-0.217  
10,97.359,rs1516512,-0.196  
10,97.379,rs520887,-0.197  
10,97.492,rs42455,-0.182  
10,97.495,rs686374,-0.182  
10,97.502,rs10740466,-0.183  
10,97.502,rs10740467,-0.183  
10,97.506,rs35794,-0.188  
10,97.515,rs582449,-0.203  
10,97.519,rs10762759,-0.209  
10,97.624,rs4979892,-0.221  
10,97.657,rs734949,-0.198  
10,97.696,rs2619648,-0.185  
10,97.699,rs12254219,-0.187  
10,97.718,rs2619645,-0.185  
10,97.759,rs873740,-0.130  
10,97.760,rs11002284,-0.129  
10,98.112,rs1366047,-0.139  
10,98.311,rs2114907,-0.200  
10,98.350,rs1149750,-0.164  
10,98.361,rs1678632,-0.154  
10,98.403,rs11002452,-0.139  
10,98.404,rs2434123,-0.139

10,98.441,rs4979807,-0.143  
10,98.444,rs1649983,-0.141  
10,98.446,rs1863833,-0.139  
10,98.453,rs1720293,-0.132  
10,98.454,rs2913115,-0.125  
10,98.457,rs2913117,-0.089  
10,98.470,rs7088190,-0.081  
10,98.473,rs1720321,-0.097  
10,98.490,rs1109073,-0.099  
10,98.508,rs1916395,-0.108  
10,98.541,rs7074180,-0.084  
10,98.652,rs7894696,-0.064  
10,98.661,rs2248789,-0.060  
10,98.698,rs2570538,-0.053  
10,98.707,rs1369752,-0.051  
10,98.743,rs1811384,-0.043  
10,98.811,rs164247,-0.034  
10,98.872,rs1025558,-0.021  
10,98.918,rs1655629,-0.016  
10,98.944,rs1665568,-0.022  
10,99.064,rs4980001,-0.022  
10,99.071,rs3893270,-0.022  
10,99.113,rs11002643,-0.020  
10,99.154,rs7917285,-0.016  
10,99.249,rs638755,-0.009  
10,99.329,rs753384,-0.014  
10,99.356,rs1339481,-0.022  
10,99.429,rs531987,-0.017  
10,99.449,rs7084256,-0.018  
10,99.456,rs6480911,-0.019  
10,99.478,rs7901632,-0.020  
10,99.565,rs3802643,-0.021  
10,99.608,rs1961130,-0.034  
10,99.645,rs1269867,-0.021  
10,99.653,rs10824714,-0.019  
10,99.666,rs1092116,-0.019  
10,99.674,rs1628089,-0.018  
10,99.686,rs704004,-0.018  
10,99.745,rs7913964,-0.030  
10,99.762,rs703979,-0.035  
10,99.832,rs1782644,-0.062  
10,99.868,rs4979857,-0.063  
10,99.902,rs1250552,-0.070  
10,99.922,rs3740259,-0.074  
10,99.926,rs884889,-0.074  
10,99.940,rs11002928,-0.077  
10,99.997,rs7082045,-0.090  
10,100.008,rs4980069,-0.094  
10,100.012,rs10740498,-0.076  
10,100.052,rs11002969,-0.071  
10,100.091,rs6480945,-0.066  
10,100.116,rs12773500,-0.082  
10,100.306,rs1650169,-0.050  
10,100.677,rs1923541,-0.021  
10,100.888,rs12259239,-0.025  
10,100.899,rs1078524,-0.025  
10,100.955,rs1079242,-0.030  
10,101.092,rs1556897,-0.031  
10,101.104,rs4934028,-0.031  
10,101.113,rs1819684,-0.031  
10,101.324,rs17680430,-0.024

10,101.421,rs17681121,-0.022  
10,101.484,rs1878041,-0.021  
10,101.508,rs10881815,-0.033  
10,101.519,rs12414728,-0.033  
10,101.548,rs1913752,-0.032  
10,101.561,rs1913751,-0.019  
10,101.564,rs4934395,-0.009  
10,101.576,rs1913754,-0.003  
10,101.578,rs17637953,-0.003  
10,101.579,rs17107479,-0.003  
10,101.581,rs1989126,-0.002  
10,101.610,rs2161885,-0.001  
10,101.616,rs11186609,-0.001  
10,101.637,rs10881952,-0.000  
10,101.753,rs10882097,0.003  
10,101.756,rs1702249,0.003  
10,101.774,rs1019595,0.002  
10,101.812,rs1911456,0.002  
10,101.826,rs954405,0.001  
10,101.860,rs735687,0.001  
10,101.883,rs10786132,0.000  
10,101.888,rs4545501,0.000  
10,101.910,rs2345209,0.003  
10,101.959,rs4511237,0.006  
10,101.960,rs12357777,0.007  
10,102.040,rs1336439,0.008  
10,102.097,rs1997974,0.018  
10,102.490,rs2103854,0.010  
10,102.541,rs7906283,0.009  
10,102.617,rs1543417,0.009  
10,102.659,rs7922516,0.008  
10,102.685,rs11191455,0.007  
10,102.700,rs956429,0.007  
10,102.913,rs7902158,0.011  
10,103.108,rs4562759,0.009  
10,103.149,rs11192502,0.008  
10,103.176,rs1649947,0.008  
10,103.193,rs1649934,0.007  
10,103.259,rs12249088,0.004  
10,103.299,rs10884361,0.000  
10,103.561,rs652183,-0.006  
10,103.588,rs17100439,-0.002  
10,103.593,rs4586096,-0.005  
10,103.635,rs2644206,-0.007  
10,103.645,rs17100713,-0.008  
10,103.652,rs2644212,-0.008  
10,103.689,rs7099749,-0.008  
10,103.720,rs512064,-0.008  
10,103.737,rs489466,-0.007  
10,103.756,rs580298,-0.007  
10,103.901,rs7911623,-0.006  
10,103.935,rs17215403,-0.007  
10,103.957,rs11197830,-0.007  
10,104.007,rs6585295,-0.008  
10,104.055,rs10886221,-0.008  
10,104.204,rs1535847,-0.008  
10,104.638,rs1333846,-0.021  
10,104.689,rs581260,-0.023  
10,104.731,rs1041626,-0.026  
10,104.747,rs871954,-0.027  
10,104.769,rs1931144,-0.028

10,104.846,rs474974,-0.033  
10,104.921,rs11200461,-0.037  
10,105.004,rs509948,-0.038  
10,105.090,rs607428,-0.038  
10,105.108,rs7086916,-0.039  
10,105.161,rs12218819,-0.045  
10,105.237,rs4426079,-0.053  
10,105.417,rs1857459,-0.038  
10,105.536,rs11200757,-0.036  
10,105.659,rs2350106,-0.033  
10,105.716,rs4244944,-0.033  
10,105.723,rs11200843,-0.032  
10,105.758,rs17103143,-0.027  
10,105.802,rs7092674,-0.022  
10,105.840,rs4244950,-0.022  
10,106.022,rs17103593,-0.031  
10,106.059,rs2798074,-0.032  
10,106.070,rs2505765,-0.024  
10,106.082,rs2488647,-0.026  
10,106.087,rs11201124,-0.027  
10,106.125,rs11599612,-0.037  
10,106.140,rs10887348,-0.038  
10,106.157,rs2505777,-0.046  
10,106.199,rs10887363,-0.051  
10,106.233,rs10887382,-0.055  
10,106.258,rs1591315,-0.034  
10,106.278,rs7091418,-0.034  
10,106.341,rs12266096,-0.037  
10,106.464,rs4934071,-0.042  
10,106.601,rs7915322,-0.049  
10,106.639,rs2351335,-0.044  
10,106.697,rs1912282,-0.052  
10,106.735,rs4543926,-0.056  
10,106.751,rs1912305,-0.056  
10,106.756,rs869963,-0.056  
10,106.757,rs1912301,-0.056  
10,106.761,rs10887497,-0.055  
10,106.806,rs2280011,-0.056  
10,106.920,rs2140661,-0.055  
10,106.932,rs11201790,-0.058  
10,107.033,rs7073759,-0.087  
10,107.037,rs7895100,-0.089  
10,107.048,rs11201840,-0.097  
10,107.058,rs7090885,-0.105  
10,107.139,rs10887554,-0.104  
10,107.150,rs12358661,-0.112  
10,107.151,rs4934149,-0.112  
10,107.165,rs11201884,-0.103  
10,107.193,rs7921149,-0.097  
10,107.198,rs1317833,-0.080  
10,107.200,rs6586000,-0.075  
10,107.208,rs1870161,-0.057  
10,107.243,rs1896514,-0.044  
10,107.260,rs7070233,-0.043  
10,107.275,rs6586019,-0.045  
10,107.292,rs2803566,-0.039  
10,107.293,rs4934243,-0.038  
10,107.310,rs3858284,-0.027  
10,107.362,rs10887683,-0.026  
10,107.386,rs1240400,-0.023  
10,107.470,rs2296063,-0.026

10,107.543,rs7080675,-0.025  
10,107.794,rs11202426,-0.023  
10,107.856,rs7100988,-0.011  
10,107.871,rs7093316,-0.009  
10,107.909,rs791875,-0.007  
10,107.930,rs11202686,0.000  
10,107.935,rs12220927,0.000  
10,107.946,rs7095034,0.000  
10,107.961,rs17110348,-0.000  
10,107.964,rs12776142,-0.001  
10,108.035,rs1035796,-0.001  
10,108.250,rs7918921,-0.003  
10,108.434,rs11202766,-0.005  
10,108.664,rs1432444,-0.006  
10,108.778,rs400659,-0.006  
10,108.898,rs3910679,-0.006  
10,108.971,rs1214546,-0.003  
10,109.000,rs11202881,-0.002  
10,109.001,rs2105436,-0.002  
10,109.032,rs12244713,-0.003  
10,109.037,rs4481939,-0.003  
10,109.087,rs1317361,-0.004  
10,109.106,rs17380969,-0.005  
10,109.197,rs7908760,-0.012  
10,109.208,rs2071510,-0.013  
10,109.213,rs885561,-0.013  
10,109.223,rs11203047,-0.012  
10,109.230,rs6586179,-0.011  
10,109.261,rs7068816,-0.001  
10,109.391,rs304478,-0.016  
10,109.404,rs303211,-0.016  
10,109.489,rs17122322,-0.013  
10,109.531,rs7087280,-0.012  
10,109.537,rs7917083,-0.012  
10,109.543,rs7076750,-0.012  
10,109.555,rs12254170,-0.012  
10,109.576,rs12573820,-0.012  
10,109.610,rs7079873,-0.012  
10,109.616,rs2038921,-0.013  
10,109.887,rs10881684,-0.027  
10,109.919,rs10785908,-0.018  
10,109.942,rs10785914,-0.020  
10,110.040,rs9919479,-0.012  
10,110.049,rs7084035,-0.011  
10,110.196,rs4933174,-0.005  
10,110.239,rs7905491,-0.003  
10,110.297,rs1329169,-0.001  
10,110.304,rs2480268,-0.000  
10,110.368,rs10219117,0.000  
10,110.429,rs11186122,-0.000  
10,110.458,rs1540997,0.001  
10,110.462,rs7898091,0.001  
10,110.512,rs12355470,0.001  
10,110.530,rs10785957,0.001  
10,110.619,rs1274352,0.001  
10,110.694,rs17097279,0.000  
10,110.731,rs1274411,0.001  
10,110.742,rs10881838,0.001  
10,110.984,rs10785976,0.000  
10,110.986,rs7905809,0.000  
10,111.220,rs934901,0.001



10,111.256,rs3910157,0.000  
10,111.408,rs3852502,0.000  
10,111.495,rs12572050,0.001  
10,111.509,rs1431864,0.001  
10,111.519,rs7088963,0.002  
10,111.520,rs7098281,0.002  
10,111.528,rs7098577,0.000  
10,111.537,rs10748558,-0.000  
10,111.540,rs6583759,-0.001  
10,111.561,rs10509625,-0.006  
10,111.567,rs2255188,-0.008  
10,111.568,rs10748559,-0.011  
10,111.624,rs11186596,-0.012  
10,111.626,rs17472998,-0.012  
10,111.632,rs11186608,-0.013  
10,111.646,rs2149825,-0.008  
10,111.672,rs4551673,-0.005  
10,111.699,rs1361552,-0.003  
10,111.735,rs7919192,-0.002  
10,111.968,rs7086285,0.000  
10,112.362,rs12778642,0.017  
10,112.631,rs7095772,0.024  
10,112.643,rs17107977,0.024  
10,112.801,rs835262,0.025  
10,112.876,rs2068888,0.026  
10,112.986,rs10786074,0.031  
10,113.038,rs913419,0.031  
10,113.059,rs1927463,0.032  
10,113.090,rs1927465,0.033  
10,113.151,rs2797559,0.038  
10,113.189,rs2761331,0.044  
10,113.197,rs11596560,0.041  
10,113.216,rs1609572,0.034  
10,113.281,rs787650,0.026  
10,113.300,rs696179,0.026  
10,113.319,rs701864,0.025  
10,113.459,rs947599,0.025  
10,113.568,rs11187515,0.035  
10,113.614,rs11187533,0.039  
10,113.653,rs3758538,0.041  
10,113.665,rs1108197,0.041  
10,113.735,rs487161,0.051  
10,113.883,rs10882306,0.034  
10,114.025,rs10509664,0.046  
10,114.092,rs4531389,0.051  
10,114.135,rs12779373,0.052  
10,114.140,rs1416757,0.052  
10,114.523,rs12768993,0.034  
10,114.681,rs1935960,0.035  
10,114.682,rs1935961,0.035  
10,114.689,rs7921117,0.034  
10,114.904,rs17416616,0.025  
10,114.915,rs7911571,0.026  
10,115.050,rs1776946,0.019  
10,115.204,rs10882470,0.029  
10,115.291,rs4917623,0.037  
10,115.343,rs7921420,0.040  
10,115.380,rs12769370,0.011  
10,115.382,rs3740508,0.010  
10,115.385,rs12761915,0.010  
10,115.391,rs7904853,0.010

10,115.441,rs7907756,0.010  
10,115.504,rs4917690,0.006  
10,115.520,rs1571131,0.006  
10,115.528,rs1326935,0.006  
10,115.551,rs1326934,0.007  
10,115.563,rs1536442,0.008  
10,115.628,rs7905711,0.004  
10,115.657,rs11188409,0.004  
10,115.714,rs10748638,0.005  
10,115.790,rs4582902,0.006  
10,115.990,rs17111253,0.007  
10,116.018,rs7923326,0.007  
10,116.135,rs1172962,0.003  
10,116.173,rs10509702,0.002  
10,116.217,rs2290714,0.001  
10,116.219,rs7911684,0.001  
10,116.238,rs727852,-0.000  
10,116.262,rs10882763,0.000  
10,116.383,rs2093558,-0.001  
10,116.445,rs7078493,-0.001  
10,116.453,rs2154203,-0.001  
10,116.507,rs10882807,-0.000  
10,116.601,rs7906985,-0.001  
10,116.661,rs11188880,-0.000  
10,116.712,rs1436187,-0.000  
10,116.810,rs4919054,-0.000  
10,116.841,rs9420695,-0.000  
10,116.845,rs12412871,-0.000  
10,116.885,rs1172377,-0.000  
10,117.232,rs17112245,-0.000  
10,117.490,rs7098931,0.000  
10,117.601,rs902467,0.000  
10,117.620,rs2817666,0.002  
10,117.741,rs11599228,0.002  
10,117.744,rs2275580,0.002  
10,117.805,rs2152092,0.002  
10,117.879,rs12259524,0.003  
10,117.889,rs7093643,0.003  
10,117.896,rs1105999,0.003  
10,117.903,rs933057,0.003  
10,117.950,rs10786364,0.004  
10,118.014,rs17108375,0.006  
10,118.052,rs7080894,0.007  
10,118.085,rs7095551,0.007  
10,118.129,rs12251897,0.008  
10,118.137,rs10882999,0.008  
10,118.140,rs11189381,0.008  
10,118.141,rs4917787,0.008  
10,118.217,rs17108583,0.007  
10,118.276,rs11189416,0.006  
10,118.284,rs531676,0.005  
10,118.303,rs522540,0.003  
10,118.311,rs510393,0.003  
10,118.381,rs4917793,0.013  
10,118.412,rs556474,0.019  
10,118.698,rs10883039,0.023  
10,118.912,rs11189510,0.013  
10,119.076,rs10883059,0.008  
10,119.134,rs11189551,0.007  
10,119.163,rs11189555,0.007  
10,119.183,rs12264514,0.005

10,119.186,rs11189563,0.005  
10,119.200,rs4919218,0.002  
10,119.228,rs17109539,0.006  
10,119.242,rs2147896,0.009  
10,119.303,rs11189619,0.017  
10,119.311,rs1998756,0.018  
10,119.321,rs7918490,0.019  
10,119.391,rs535182,0.026  
10,119.403,rs3853516,0.026  
10,119.421,rs502195,0.028  
10,119.627,rs2862447,0.025  
10,119.802,rs11596018,0.022  
10,120.007,rs12573571,0.023  
10,120.009,rs12764454,0.023  
10,120.109,rs2278842,0.039  
10,120.141,rs3844556,0.043  
10,120.148,rs603424,0.043  
10,120.208,rs735877,0.027  
10,120.266,rs570844,0.022  
10,120.713,rs1110286,0.001  
10,120.735,rs7068072,0.000  
10,120.755,rs4919478,0.000  
10,120.807,rs12254876,0.002  
10,120.885,rs12773509,0.004  
10,120.929,rs912478,0.008  
10,120.938,rs4919504,0.009  
10,120.945,rs10883547,0.005  
10,120.952,rs12248258,0.005  
10,120.979,rs11190747,0.006  
10,120.997,rs10883563,0.007  
10,121.052,rs11190780,0.006  
10,121.111,rs967201,0.005  
10,121.204,rs10748804,0.006  
10,121.215,rs807043,0.005  
10,121.263,rs1361265,0.003  
10,121.297,rs12415670,0.002  
10,121.325,rs4917928,0.002  
10,121.413,rs1556862,0.002  
10,121.421,rs11598564,0.002  
10,121.598,rs621106,-0.000  
10,121.609,rs3802727,-0.000  
10,121.941,rs6584453,0.000  
10,122.053,rs17777943,0.000  
10,122.126,rs17114406,0.000  
10,122.130,rs7897,0.000  
10,122.156,rs7083450,0.000  
10,122.182,rs17114433,0.001  
10,122.224,rs11191274,0.001  
10,122.225,rs1057050,0.001  
10,122.231,rs7897947,0.001  
10,122.253,rs927821,0.001  
10,122.256,rs11191291,0.001  
10,122.259,rs7075281,0.001  
10,122.320,rs17114803,0.000  
10,122.397,rs7922982,0.000  
10,122.433,rs11191666,0.000  
10,122.446,rs11598673,0.000  
10,122.464,rs3014188,0.000  
10,122.478,rs6584555,0.000  
10,122.514,rs7068081,0.000  
10,122.610,rs3781347,0.001

10,122.716,rs2047036,0.001  
10,122.809,rs2073341,-0.000  
10,122.833,rs10786770,-0.000  
10,122.849,rs10883931,0.000  
10,122.857,rs2067832,0.000  
10,122.885,rs2864004,-0.000  
10,122.889,rs10883953,-0.000  
10,122.922,rs805721,-0.002  
10,122.971,rs10748861,-0.011  
10,122.974,rs642743,-0.011  
10,122.983,rs10883979,-0.011  
10,123.040,rs7095770,-0.009  
10,123.056,rs7908698,-0.010  
10,123.060,rs10786792,-0.011  
10,123.061,rs1565415,-0.004  
10,123.118,rs745947,-0.003  
10,123.147,rs1490171,-0.002  
10,123.249,rs10786828,-0.003  
10,123.563,rs2418774,-0.002  
10,123.881,rs556646,-0.001  
10,124.045,rs11192698,-0.002  
10,124.133,rs472664,-0.002  
10,124.154,rs12360303,-0.001  
10,124.196,rs2150604,0.002  
10,124.208,rs12251422,0.004  
10,124.291,rs952965,0.029  
10,124.310,rs12217685,0.034  
10,124.323,rs12262411,0.038  
10,124.330,rs12412964,0.040  
10,124.341,rs11192931,0.045  
10,124.366,rs2181019,0.056  
10,124.394,rs11814145,0.058  
10,124.462,rs821950,0.060  
10,124.489,rs10748924,0.061  
10,124.621,rs11193065,0.050  
10,124.721,rs1004921,0.042  
10,124.723,rs7095894,0.042  
10,124.790,rs10786998,0.044  
10,124.905,rs950809,0.058  
10,124.938,rs10884409,0.057  
10,124.960,rs7901596,0.053  
10,124.987,rs7073924,0.048  
10,124.996,rs4918282,0.031  
10,125.015,rs669061,0.033  
10,125.136,rs17284802,0.016  
10,125.240,rs12416679,0.016  
10,125.811,rs12766593,0.015  
10,125.854,rs10748948,0.015  
10,125.884,rs7072807,0.012  
10,125.895,rs1902728,0.007  
10,125.945,rs2243561,0.011  
10,125.947,rs2026777,0.011  
10,125.948,rs11193711,0.010  
10,125.956,rs12768215,0.011  
10,125.962,rs12768320,0.010  
10,125.963,rs7067538,0.009  
10,126.024,rs7920282,0.008  
10,126.031,rs7897681,0.008  
10,126.090,rs11193901,0.011  
10,126.101,rs1936488,0.011  
10,126.153,rs12359500,0.013

10,126.197,rs1411023,0.017  
10,126.293,rs7922237,0.039  
10,126.300,rs11194176,0.033  
10,126.304,rs2482594,0.029  
10,126.514,rs723483,0.031  
10,126.539,rs7904064,0.036  
10,126.568,rs12249259,0.043  
10,126.692,rs7072754,0.077  
10,126.705,rs1541130,0.080  
10,126.758,rs10884796,0.082  
10,126.822,rs12354938,0.090  
10,127.395,rs12358885,0.099  
10,127.456,rs2501574,0.100  
10,127.568,rs12573269,0.095  
10,127.755,rs2027126,0.089  
10,127.787,rs2168741,0.076  
10,127.796,rs12246208,0.073  
10,127.844,rs7098940,0.062  
10,127.847,rs10884961,0.061  
10,127.859,rs10444086,0.059  
10,127.866,rs1541050,0.058  
10,127.892,rs10884971,0.055  
10,127.962,rs1889568,0.053  
10,128.088,rs7898064,0.045  
10,128.106,rs4350299,0.044  
10,128.126,rs11195244,0.044  
10,128.244,rs4631816,0.063  
10,128.295,rs2078243,0.084  
10,128.323,rs12356300,0.094  
10,128.331,rs2146548,0.115  
10,128.378,rs7073243,0.115  
10,128.422,rs1407696,0.103  
10,128.671,rs6585131,0.101  
10,128.696,rs7923493,0.102  
10,128.816,rs2419601,0.078  
10,128.887,rs2804609,0.061  
10,128.901,rs2804616,0.059  
10,128.953,rs2803594,0.048  
10,129.025,rs10749108,0.043  
10,129.237,rs943264,0.025  
10,129.238,rs11195874,0.025  
10,129.298,rs7896275,0.028  
10,129.400,rs17129748,0.030  
10,129.428,rs6585185,0.053  
10,129.475,rs4918769,0.051  
10,129.510,rs4918773,0.051  
10,129.520,rs7915497,0.049  
10,129.579,rs7903017,0.045  
10,129.666,rs4917637,0.037  
10,129.909,rs11196152,0.037  
10,130.093,rs7903146,0.034  
10,130.218,rs10885410,0.025  
10,130.219,rs7919409,0.025  
10,130.220,rs7100388,0.025  
10,130.284,rs7085532,0.025  
10,130.356,rs3814573,0.027  
10,130.368,rs7903424,0.027  
10,130.381,rs176632,0.027  
10,130.383,rs1555485,0.026  
10,130.384,rs1028629,0.026  
10,130.657,rs2788178,0.000

10,130.754,rs11196304,-0.000  
10,130.774,rs7093035,-0.001  
10,130.807,rs11196312,-0.000  
10,130.921,rs7895990,-0.001  
10,130.941,rs1394495,-0.001  
10,131.050,rs6585225,-0.000  
10,131.103,rs7088233,-0.000  
10,131.154,rs11575634,0.000  
10,131.173,rs2419840,-0.000  
10,131.257,rs3127084,0.001  
10,131.311,rs3121478,-0.000  
10,131.505,rs4394799,-0.000  
10,131.604,rs10509985,-0.000  
10,131.659,rs7084835,-0.000  
10,131.680,rs10509990,-0.000  
10,131.821,rs17775854,-0.001  
10,131.828,rs1576479,-0.001  
10,131.860,rs151598,-0.000  
10,131.874,rs7894582,-0.000  
10,131.880,rs180950,-0.004  
10,131.955,rs1411407,-0.002  
10,131.959,rs10490907,-0.002  
10,131.988,rs238753,-0.001  
10,132.018,rs2782979,-0.001  
10,132.497,rs2420054,-0.002  
10,132.530,rs597371,-0.002  
10,132.604,rs539946,-0.002  
10,132.631,rs1889449,-0.002  
10,132.689,rs507098,-0.001  
10,132.946,rs1334469,-0.000  
10,133.035,rs10787526,0.000  
10,133.067,rs493347,0.000  
10,133.328,rs7075375,0.001  
10,133.414,rs941853,0.002  
10,133.699,rs2475228,0.006  
10,134.198,rs11196793,0.001  
10,134.280,rs7914325,0.008  
10,134.295,rs11196799,0.009  
10,134.393,rs11196810,0.010  
10,134.582,rs7893317,0.011  
10,134.664,rs4751639,0.010  
10,134.968,rs17093295,0.007  
10,134.985,rs2804192,0.006  
10,135.397,rs10490916,0.005  
10,135.707,rs3740571,0.007  
10,135.715,rs4751939,0.007  
10,135.754,rs180723,0.002  
10,135.937,rs7071452,0.002  
10,135.980,rs10490904,0.001  
10,135.983,rs2694773,0.002  
10,135.987,rs3901216,0.004  
10,135.996,rs2530343,0.007  
10,136.084,rs3781532,0.006  
10,136.177,rs11197571,0.026  
10,136.180,rs7909875,0.027  
10,136.361,rs2532689,0.011  
10,136.582,rs17094643,0.010  
10,136.600,rs17734465,0.010  
10,136.645,rs17094705,0.009  
10,136.682,rs10885935,0.007  
10,136.819,rs4751986,0.002

10,136.940,rs3010494,0.000  
10,136.993,rs2305206,-0.000  
10,137.004,rs3781564,-0.000  
10,137.063,rs10885995,-0.001  
10,137.115,rs1867987,-0.000  
10,137.117,rs880887,-0.002  
10,137.119,rs880977,-0.002  
10,137.249,rs758367,0.000  
10,137.318,rs1665676,0.003  
10,137.350,rs1900501,0.005  
10,137.418,rs11596422,0.008  
10,137.452,rs10787735,0.008  
10,137.500,rs12766760,0.009  
10,137.597,rs716183,0.021  
10,137.621,rs1638438,0.017  
10,137.666,rs2619105,0.020  
10,137.705,rs363221,0.018  
10,137.706,rs363251,0.018  
10,137.737,rs2532812,0.017  
10,137.786,rs181440,0.016  
10,137.790,rs17096145,0.015  
10,137.856,rs1638662,0.001  
10,137.861,rs181499,0.001  
10,137.877,rs2794427,0.002  
10,137.881,rs452035,0.002  
10,137.928,rs451123,0.005  
10,137.931,rs2420459,0.006  
10,137.957,rs12570134,0.010  
10,137.997,rs242959,0.020  
10,137.998,rs181585,0.020  
10,138.007,rs7358112,0.022  
10,138.013,rs181623,0.023  
10,138.249,rs855992,0.022  
10,138.315,rs12770749,0.014  
10,138.317,rs703405,0.014  
10,138.503,rs12218538,0.012  
10,138.622,rs1024265,0.014  
10,138.647,rs6585456,0.015  
10,138.760,rs1006286,0.039  
10,138.805,rs1925280,0.048  
10,138.861,rs7476605,0.061  
10,138.958,rs11198112,0.072  
10,139.011,rs729465,0.078  
10,139.049,rs6585463,0.083  
10,139.137,rs1925265,0.077  
10,139.165,rs17641472,0.066  
10,139.173,rs2147741,0.068  
10,139.281,rs11198167,0.044  
10,139.300,rs1936298,0.041  
10,139.521,rs7069291,0.034  
10,139.579,rs1797,0.033  
10,140.222,rs703424,0.035  
10,140.274,rs1577074,0.031  
10,140.359,rs984428,0.025  
10,140.414,rs6585481,0.022  
10,140.483,rs236212,0.015  
10,140.553,rs853943,0.011  
10,140.606,rs1970582,0.009  
10,140.623,rs874231,0.009  
10,140.653,rs11198439,0.009  
10,140.670,rs12263039,0.010

10,140.692,rs11198458,0.010  
10,140.771,rs17097793,0.011  
10,140.837,rs1766253,0.012  
10,140.952,rs873598,0.020  
10,141.140,rs11813458,0.053  
10,141.182,rs11596456,0.070  
10,141.205,rs751973,0.078  
10,141.266,rs10510050,0.099  
10,141.286,rs7098706,0.110  
10,141.384,rs943271,0.164  
10,141.402,rs943269,0.172  
10,141.439,rs12242686,0.182  
10,141.560,rs10886375,0.192  
10,141.693,rs6585536,0.211  
10,141.714,rs2275111,0.216  
10,141.776,rs10510054,0.236  
10,141.814,rs7093673,0.243  
10,141.821,rs17606354,0.246  
10,141.890,rs928670,0.268  
10,141.947,rs871196,0.261  
10,142.020,rs17098766,0.262  
10,142.071,rs10886471,0.263  
10,142.131,rs10886487,0.249  
10,142.134,rs3009874,0.249  
10,142.150,rs756279,0.250  
10,142.164,rs4752324,0.250  
10,142.198,rs12569630,0.250  
10,142.363,rs7091662,0.270  
10,142.369,rs1008727,0.269  
10,142.736,rs2456709,0.267  
10,142.895,rs17099385,0.270  
10,142.995,rs10886553,0.277  
10,143.162,rs4288683,0.321  
10,143.294,rs7894011,0.374  
10,143.295,rs10788037,0.334  
10,143.296,rs10788038,0.306  
10,143.390,rs6585586,0.343  
10,143.578,rs1999414,0.436  
10,143.580,rs2026959,0.436  
10,143.751,rs3847499,0.444  
10,143.807,rs997856,0.425  
10,143.871,rs10788079,0.406  
10,143.886,rs7913921,0.401  
10,143.911,rs7068076,0.394  
10,143.953,rs2463147,0.388  
10,143.981,rs7894236,0.359  
10,144.023,rs12770951,0.373  
10,144.065,rs7910507,0.379  
10,144.070,rs4752432,0.379  
10,144.095,rs12243885,0.381  
10,144.103,rs11592655,0.380  
10,144.131,rs11199430,0.365  
10,144.147,rs2420783,0.353  
10,144.167,rs2901256,0.330  
10,144.182,rs7068008,0.340  
10,144.247,rs4751798,0.319  
10,144.266,rs6585658,0.319  
10,144.294,rs10788116,0.316  
10,144.314,rs9421389,0.291  
10,144.371,rs6585662,0.243  
10,144.382,rs2997288,0.236



10,144.400,rs10886772,0.259  
10,144.591,rs11199681,0.317  
10,144.637,rs10886827,0.322  
10,144.651,rs6585682,0.325  
10,144.658,rs4752493,0.328  
10,144.661,rs2260801,0.329  
10,144.730,rs11199725,0.341  
10,144.740,rs2420903,0.344  
10,144.775,rs4752496,0.248  
10,144.870,rs11199775,0.196  
10,144.872,rs7072244,0.196  
10,144.908,rs12259125,0.194  
10,144.996,rs7085142,0.181  
10,145.103,rs11599530,0.232  
10,145.135,rs7905858,0.236  
10,145.146,rs11199859,0.235  
10,145.153,rs4752526,0.235  
10,145.192,rs9630106,0.239  
10,145.293,rs7895870,0.169  
10,145.329,rs10886918,0.161  
10,145.420,rs10788173,0.148  
10,145.425,rs12570261,0.148  
10,145.441,rs4752541,0.123  
10,145.630,rs755698,0.135  
10,145.784,rs11199957,0.145  
10,145.797,rs17101979,0.145  
10,145.986,rs4644589,0.132  
10,146.133,rs1047057,0.092  
10,146.173,rs1613776,0.094  
10,146.438,rs2912787,0.108  
10,146.443,rs2981428,0.108  
10,146.504,rs1649181,0.107  
10,146.526,rs7896565,0.097  
10,146.559,rs10788196,0.107  
10,146.647,rs2936862,0.131  
10,146.649,rs2936863,0.131  
10,146.656,rs2936875,0.131  
10,146.758,rs9651480,0.132  
10,146.910,rs7914615,0.185  
10,147.022,rs6585776,0.212  
10,147.086,rs2459093,0.192  
10,147.113,rs2461224,0.184  
10,147.126,rs12242677,0.181  
10,147.134,rs11200397,0.181  
10,147.136,rs2420993,0.180  
10,147.170,rs10887082,0.170  
10,147.191,rs4752656,0.236  
10,147.194,rs10788250,0.227  
10,147.195,rs10788251,0.229  
10,147.203,rs7097751,0.252  
10,147.208,rs4752659,0.249  
10,147.237,rs10788257,0.281  
10,147.258,rs4751878,0.297  
10,147.285,rs2295873,0.337  
10,147.343,rs12262185,0.384  
10,147.411,rs7082865,0.438  
10,147.466,rs6585819,0.453  
10,147.617,rs2248799,0.548  
10,147.626,rs12571363,0.552  
10,147.631,rs4752699,0.554  
10,147.635,rs4752700,0.556

10,147.668,rs763720,0.550  
10,147.930,rs12266077,0.451  
10,147.940,rs1917847,0.448  
10,147.995,rs11248487,0.438  
10,148.036,rs7096042,0.431  
10,148.038,rs10902963,0.431  
10,148.119,rs18911111,0.425  
10,148.359,rs7070793,0.397  
10,148.409,rs4980248,0.393  
10,148.432,rs7094941,0.395  
10,148.480,rs10794595,0.365  
10,148.490,rs17104688,0.359  
10,148.493,rs17104692,0.357  
10,148.511,rs10902882,0.355  
10,148.547,rs2495774,0.342  
10,148.581,rs2495769,0.341  
10,148.612,rs6599666,0.364  
10,148.625,rs4131048,0.341  
10,148.857,rs6599695,0.373  
10,148.923,rs7916709,0.376  
10,148.977,rs11248533,0.371  
10,149.067,rs705150,0.364  
10,149.133,rs1557614,0.352  
10,149.184,rs7897598,0.344  
10,149.239,rs11248566,0.340  
10,149.241,rs10732908,0.340  
10,149.252,rs1474016,0.371  
10,149.277,rs705169,0.367  
10,149.290,rs841019,0.366  
10,149.714,rs12762474,0.305  
10,149.798,rs1122370,0.292  
10,149.827,rs12261064,0.289  
10,149.979,rs4980204,0.273  
10,150.004,rs10902797,0.273  
10,150.180,rs7909042,0.275  
10,150.192,rs12266074,0.271  
10,150.212,rs727416,0.273  
10,150.292,rs2162536,0.281  
10,150.368,rs7909601,0.286  
10,150.433,rs7924189,0.270  
10,150.531,rs1914543,0.247  
10,150.612,rs7071108,0.332  
10,150.624,rs7096722,0.344  
10,150.656,rs4460752,0.357  
10,150.726,rs4590807,0.357  
10,150.778,rs4472872,0.352  
10,150.857,rs4929820,0.341  
10,151.042,rs11593516,0.296  
10,151.044,rs7905355,0.268  
10,151.083,rs6597799,0.298  
10,151.215,rs7917787,0.298  
10,151.264,rs885042,0.292  
10,151.282,rs10794004,0.290  
10,151.304,rs2459219,0.278  
10,151.357,rs10430741,0.273  
10,151.367,rs17619406,0.272  
10,151.473,rs1710563,0.264  
10,151.569,rs11245086,0.318  
10,151.598,rs12785110,0.318  
10,151.619,rs4962632,0.316  
10,151.630,rs12569498,0.314

10,151.692,rs10901745,0.304  
10,151.811,rs7918137,0.287  
10,151.840,rs12269470,0.283  
10,151.861,rs17152064,0.286  
10,151.891,rs11595762,0.289  
10,152.184,rs4450131,0.309  
10,152.264,rs10794178,0.305  
10,152.703,rs11595972,0.273  
10,152.721,rs11245408,0.274  
10,153.017,rs7097802,0.282  
10,153.057,rs3781433,0.282  
10,153.112,rs3781408,0.309  
10,153.178,rs718947,0.322  
10,153.201,rs2936540,0.309  
10,153.223,rs2936542,0.270  
10,153.224,rs2935652,0.271  
10,153.248,rs3012070,0.317  
10,153.283,rs1152661,0.353  
10,153.476,rs1915146,0.403  
10,153.558,rs1693663,0.398  
10,153.560,rs1715869,0.398  
10,153.587,rs11245535,0.431  
10,153.601,rs4393270,0.433  
10,153.631,rs10901876,0.433  
10,153.667,rs9285980,0.404  
10,153.853,rs3851566,0.345  
10,154.287,rs3886847,0.372  
10,154.333,rs2886405,0.372  
10,154.575,rs4962471,0.328  
10,154.589,rs4962311,0.327  
10,154.644,rs7083854,0.326  
10,154.741,rs297226,0.321  
10,154.992,rs1872006,0.275  
10,155.290,rs10510149,0.302  
10,156.090,rs1871054,0.304  
10,156.180,rs1278313,0.301  
10,156.217,rs7896870,0.296  
10,156.277,rs2169076,0.258  
10,156.284,rs1676741,0.257  
10,156.334,rs1278377,0.253  
10,156.451,rs7097356,0.252  
10,156.574,rs11244923,0.267  
10,156.601,rs10901580,0.276  
10,156.608,rs17154643,0.277  
10,156.710,rs11244948,0.302  
10,156.719,rs10901587,0.302  
10,156.778,rs10901596,0.266  
10,156.936,rs7081193,0.330  
10,156.996,rs7919486,0.331  
10,157.037,rs4077952,0.312  
10,157.081,rs7900906,0.315  
10,157.138,rs4962558,0.323  
10,157.145,rs7091466,0.346  
10,157.148,rs10901612,0.321  
10,157.173,rs7079392,0.279  
10,157.193,rs17154831,0.249  
10,157.286,rs10510159,0.238  
10,157.288,rs4246194,0.237  
10,157.291,rs11245007,0.236  
10,157.393,rs7916680,0.223  
10,157.409,rs7904837,0.234

10,157.432,rs7916733,0.220  
10,157.526,rs10736874,0.212  
10,157.561,rs2576027,0.216  
10,157.703,rs2842169,0.220  
10,157.710,rs1436789,0.219  
10,157.773,rs10736875,0.200  
10,157.846,rs2366870,0.179  
10,157.911,rs10901666,0.189  
10,157.925,rs7905277,0.175  
10,157.928,rs2366878,0.172  
10,157.936,rs17155177,0.173  
10,157.950,rs12771596,0.188  
10,158.046,rs2005556,0.301  
10,158.057,rs6597797,0.301  
10,158.279,rs7074496,0.296  
10,158.281,rs4962373,0.301  
10,158.294,rs11245203,0.330  
10,158.296,rs12246650,0.330  
10,158.298,rs11245204,0.296  
10,158.324,rs11245214,0.274  
10,158.352,rs7474861,0.240  
10,158.377,rs7915184,0.242  
10,158.649,rs10741150,0.193  
10,158.668,rs4750951,0.164  
10,158.690,rs9418677,0.210  
10,158.723,rs7092134,0.213  
10,158.742,rs4750895,0.241  
10,158.822,rs7895398,0.244  
10,159.008,rs2489379,0.251  
10,159.025,rs2483865,0.253  
10,159.186,rs2766070,0.256  
10,159.247,rs12146386,0.336  
10,159.311,rs10764990,0.398  
10,159.335,rs4751282,0.412  
10,159.388,rs4751323,0.403  
10,159.402,rs12412384,0.385  
10,159.404,rs10829972,0.383  
10,159.417,rs3740547,0.362  
10,159.491,rs1931702,0.395  
10,159.495,rs10830067,0.396  
10,159.497,rs7904011,0.396  
10,159.500,rs3740543,0.430  
10,159.574,rs4751427,0.436  
10,159.623,rs999069,0.429  
10,159.628,rs10830112,0.430  
10,159.640,rs4751436,0.431  
10,159.664,rs4751439,0.433  
10,159.726,rs1547321,0.456  
10,159.741,rs971175,0.452  
10,159.793,rs7082785,0.449  
10,159.803,rs1113103,0.380  
10,159.852,rs7079420,0.398  
10,159.902,rs12245508,0.385  
10,159.907,rs1316459,0.420  
10,159.916,rs12248827,0.384  
10,159.968,rs10830159,0.419  
10,160.053,rs1926161,0.403  
10,160.262,rs649611,0.362  
10,160.280,rs11816315,0.380  
10,160.294,rs11018336,0.389  
10,160.314,rs582667,0.368

10,160.333,rs4590782,0.344  
10,160.371,rs11018383,0.324  
10,160.401,rs2148895,0.297  
10,160.408,rs4751548,0.291  
10,160.530,rs7922467,0.290  
10,160.559,rs12266909,0.290  
10,160.583,rs7894368,0.299  
10,160.606,rs4531377,0.307  
10,160.634,rs7085243,0.316  
10,160.662,rs7089539,0.287  
10,160.693,rs4547012,0.244  
10,160.736,rs10829321,0.184  
10,160.763,rs10764743,0.173  
10,160.793,rs7911438,0.172  
10,160.865,rs1063535,0.170  
10,160.894,rs2853344,0.169  
10,161.162,rs7912288,0.163  
10,161.163,rs12572759,0.163  
10,161.610,rs7086416,0.195  
10,161.979,rs2244545,0.222  
10,162.342,rs10829388,0.226  
10,162.381,rs2154081,0.227  
10,162.696,rs1541178,0.268  
10,162.843,rs7475176,0.275  
10,162.958,rs1572760,0.248  
10,162.994,rs951827,0.250  
10,163.089,rs1541175,0.262  
10,163.119,rs11016282,0.267  
10,163.367,rs7913051,0.217  
10,163.388,rs4750710,0.239  
10,163.389,rs7086546,0.239  
10,163.652,rs1359974,0.155  
10,163.788,rs6482693,0.158  
10,163.820,rs2182965,0.147  
10,163.908,rs7098205,0.116  
10,164.008,rs748307,0.088  
10,164.062,rs782388,0.073  
10,164.130,rs11594084,0.047  
10,164.135,rs11016427,0.046  
10,164.155,rs12412378,0.047  
10,164.184,rs2038967,0.037  
10,164.278,rs1887244,0.045  
10,164.423,rs4750717,0.064  
10,164.488,rs10764807,0.071  
10,164.547,rs1536452,0.078  
10,164.707,rs646066,0.093  
10,165.004,rs7091108,0.123  
10,165.040,rs4751013,0.113  
10,165.264,rs10829512,0.136  
10,165.307,rs10764826,0.170  
10,165.453,rs3824759,0.166  
10,165.471,rs10829518,0.167  
10,165.601,rs7092525,0.155  
10,165.711,rs2060894,0.133  
10,165.747,rs4750724,0.148  
10,165.775,rs7919827,0.139  
10,166.052,rs914573,0.120  
10,166.103,rs7099795,0.114  
10,166.171,rs10829553,0.106  
10,166.204,rs7101205,0.125  
10,166.230,rs10829558,0.132

10,166.447,rs11016684,0.139  
10,166.496,rs1998824,0.155  
10,166.537,rs10128422,0.173  
10,166.735,rs4751072,0.149  
10,166.798,rs1990783,0.160  
10,166.839,rs476628,0.166  
10,166.887,rs11016723,0.179  
10,166.901,rs2803458,0.186  
10,167.168,rs11598707,0.157  
10,167.222,rs2111627,0.153  
10,167.430,rs6482736,0.157  
10,167.983,rs551491,0.234  
10,168.319,rs1978759,0.249  
10,168.333,rs2282163,0.247  
10,168.345,rs4751115,0.245  
10,168.467,rs11511217,0.178  
10,168.537,rs10764906,0.179  
10,168.552,rs1547177,0.182  
10,168.591,rs3750832,0.188  
10,168.637,rs11016948,0.185  
10,168.719,rs7911165,0.178  
10,168.740,rs3763758,0.158  
10,168.789,rs7100028,0.125  
10,168.790,rs12783441,0.124  
10,168.827,rs10734091,0.111  
10,168.839,rs4751140,0.086  
10,168.862,rs7895769,0.078  
10,168.875,rs7076708,0.078  
10,168.916,rs944963,0.090  
10,168.960,rs4751143,0.073  
10,169.040,rs6482766,0.090  
10,169.088,rs4751153,0.124  
10,169.204,rs670243,0.155  
10,169.325,rs7069452,0.210  
10,169.375,rs2477970,0.211  
10,169.459,rs671799,0.240  
10,169.474,rs3824760,0.243  
10,169.506,rs662041,0.249  
10,169.559,rs11017074,0.268  
10,169.842,rs16910182,0.376  
10,169.853,rs2281842,0.380  
10,169.885,rs10764938,0.387  
10,169.893,rs4751178,0.386  
10,170.068,rs4750795,0.375  
10,170.227,rs11017185,0.364  
10,170.350,rs7899854,0.357  
10,170.366,rs447363,0.356  
10,170.372,rs7903921,0.355  
10,170.407,rs12569655,0.355  
10,170.459,rs359114,0.356  
10,170.529,rs440075,0.356  
10,170.577,rs10829742,0.431  
10,170.974,rs11017313,0.331  
10,171.096,rs4751239,0.339  
10,171.229,rs12251302,0.347  
10,171.309,rs1176471,0.323  
10,171.576,rs7089879,0.360  
10,171.618,rs7088736,0.363  
10,171.710,rs10741226,0.369  
10,171.827,rs2663014,0.381  
10,171.997,rs7907842,0.439

10,172.020,rs11813883,0.480  
10,172.088,rs12242470,0.472  
10,172.263,rs4751287,0.441  
10,172.308,rs12769679,0.428  
10,172.339,rs1036270,0.463  
10,172.402,rs7072329,0.435  
10,172.563,rs3125602,0.410  
10,172.785,rs7924276,0.390  
10,172.904,rs12764951,0.419  
10,173.028,rs1891792,0.448  
10,173.073,rs7073264,0.472  
10,173.121,rs4418720,0.497  
10,173.146,rs2298193,0.550  
10,173.206,rs6482862,0.551  
10,173.243,rs11017747,0.561  
10,173.282,rs2918145,0.570  
10,173.303,rs2944529,0.574  
10,173.317,rs12570210,0.583  
10,173.367,rs11017797,0.623  
10,173.382,rs999191,0.628  
10,173.397,rs2944462,0.627  
10,173.433,rs11597694,0.602  
10,173.449,rs4751345,0.595  
10,173.467,rs2918125,0.576  
10,173.484,rs10741246,0.575  
10,173.486,rs2918123,0.575  
10,173.596,rs1020105,0.560  
10,173.670,rs12573222,0.580  
10,173.763,rs2918118,0.589  
10,173.839,rs10829970,0.594  
10,173.872,rs11017878,0.596  
10,173.885,rs2397769,0.596  
10,173.904,rs7078641,0.590  
10,173.979,rs7898539,0.568  
10,174.093,rs3123221,0.566  
10,174.150,rs7893895,0.579  
10,174.171,rs4076152,0.580  
10,174.214,rs10830004,0.586  
10,174.298,rs3125535,0.581  
10,174.530,rs10830019,0.562  
10,174.611,rs12164734,0.519  
10,174.639,rs7895295,0.507  
10,174.715,rs12779178,0.549  
10,174.737,rs10830037,0.601  
10,174.738,rs4486534,0.601  
10,175.046,rs10872807,0.492  
10,175.148,rs3924169,0.515  
10,175.224,rs4545466,0.535  
10,175.282,rs10872825,0.606  
10,175.290,rs9419698,0.607  
10,175.322,rs9419702,0.608  
10,175.336,rs7906770,0.600  
10,175.415,rs4307646,0.563  
10,175.580,rs7893330,0.546  
10,175.605,rs11156481,0.546  
10,175.874,rs9419387,0.542  
10,176.019,rs11596895,0.514  
10,176.053,rs9419257,0.509  
10,176.059,rs9419138,0.509  
10,176.126,rs9419167,0.523  
10,176.148,rs9419332,0.527

10,176.312,rs7083603,0.589  
10,176.323,rs1491192,0.592  
10,176.469,rs2101613,0.598  
10,176.559,rs870427,0.648  
10,176.654,rs10781565,0.732  
10,176.826,rs4554798,0.689  
10,176.928,rs10870303,0.645  
10,176.989,rs4880251,0.644  
10,177.026,rs10870304,0.643  
10,177.192,rs4492738,0.637  
10,177.447,rs7907513,0.628  
10,177.571,rs4880419,0.623  
10,177.595,rs10781583,0.618  
10,177.751,rs3793669,0.574  
10,177.940,rs7096226,0.526  
10,178.090,rs9419242,0.531  
10,178.120,rs10870347,0.527  
10,178.264,rs12242379,0.522  
10,178.366,rs10870214,0.515  
10,178.583,rs11591580,0.423  
10,178.692,rs736017,0.407  
10,178.727,rs9419011,0.403  
10,178.902,rs11101622,0.366  
10,178.996,rs12415590,0.358  
10,179.041,rs2185743,0.354  
10,179.117,rs1573041,0.359  
10,179.238,rs2298122,0.398  
10,179.317,rs11819066,0.437  
10,179.391,rs6537600,0.472  
10,179.566,rs2255518,0.434  
10,179.939,rs4628635,0.360  
11,0.041,rs6421966,-0.000  
11,0.322,rs1541314,-0.000  
11,0.398,rs3829223,-0.000  
11,0.445,rs5743899,0.000  
11,0.620,rs4881729,0.000  
11,0.689,rs10833703,0.000  
11,1.080,rs7947734,0.004  
11,1.172,rs16927458,0.004  
11,1.202,rs1489945,0.004  
11,1.250,rs11607954,0.008  
11,1.257,rs4752744,0.006  
11,1.302,rs4752733,0.003  
11,1.527,rs907604,-0.002  
11,1.543,rs907609,-0.003  
11,1.578,rs2089910,-0.006  
11,1.658,rs548195,-0.005  
11,1.717,rs909116,-0.003  
11,1.887,rs4930103,-0.001  
11,1.927,rs4930001,-0.000  
11,1.993,rs11825579,0.000  
11,2.016,rs4930030,0.000  
11,2.158,rs734351,0.002  
11,2.186,rs1004446,0.002  
11,2.244,rs11042978,0.003  
11,2.318,rs11043140,0.002  
11,2.333,rs11021732,0.003  
11,2.466,rs10831706,0.000  
11,2.466,rs2521259,0.000  
11,2.474,rs1029409,0.000  
11,2.665,rs2019938,-0.002



11,2.701,rs739673,-0.005  
11,2.736,rs2301698,-0.017  
11,2.809,rs800336,-0.007  
11,2.822,rs11022922,-0.006  
11,2.949,rs11826873,-0.004  
11,2.964,rs2283155,-0.004  
11,2.972,rs179431,-0.009  
11,2.993,rs1997619,-0.012  
11,3.015,rs4539307,-0.012  
11,3.030,rs2283169,-0.010  
11,3.068,rs4930128,-0.008  
11,3.087,rs12808620,-0.007  
11,3.133,rs7104624,-0.008  
11,3.154,rs7929804,-0.009  
11,3.254,rs12418076,-0.004  
11,3.301,rs7939976,-0.002  
11,3.354,rs2283202,-0.003  
11,3.357,rs231888,-0.003  
11,3.384,rs231906,-0.006  
11,3.406,rs7114479,-0.005  
11,3.437,rs11023999,-0.005  
11,3.444,rs179785,-0.004  
11,3.504,rs2237886,-0.003  
11,3.522,rs151316,-0.004  
11,3.579,rs163184,-0.001  
11,3.688,rs4930026,-0.000  
11,3.713,rs384037,0.000  
11,3.736,rs367035,0.000  
11,3.763,rs16928809,0.000  
11,3.768,rs427398,0.000  
11,4.018,rs451041,-0.000  
11,4.163,rs7925089,0.004  
11,4.164,rs4237782,0.004  
11,4.183,rs4758529,0.007  
11,4.230,rs1562353,0.011  
11,4.260,rs4261264,0.017  
11,4.265,rs4758544,0.019  
11,4.304,rs2412143,0.043  
11,4.310,rs16929180,0.044  
11,4.343,rs4758480,0.046  
11,4.346,rs7106188,0.046  
11,4.402,rs4556520,0.054  
11,4.427,rs11026091,0.056  
11,4.636,rs2073805,0.132  
11,4.658,rs17761375,0.132  
11,4.710,rs7103207,0.134  
11,5.094,rs7127562,0.168  
11,5.206,rs6578399,0.173  
11,5.220,rs10834648,0.156  
11,5.260,rs6578410,0.167  
11,5.357,rs10834863,0.151  
11,5.493,rs7931756,0.137  
11,5.499,rs276885,0.136  
11,5.577,rs7120836,0.104  
11,5.603,rs1451724,0.098  
11,5.616,rs7934650,0.098  
11,5.661,rs7126870,0.118  
11,5.728,rs10742189,0.130  
11,5.733,rs4365044,0.130  
11,6.070,rs2268166,0.113  
11,6.141,rs10835678,0.110

11,6.173,rs979942,0.106  
11,6.523,rs12293167,0.090  
11,6.560,rs2554933,0.070  
11,6.597,rs1376679,0.069  
11,6.607,rs1549489,0.073  
11,6.628,rs10836054,0.073  
11,6.638,rs4910980,0.065  
11,6.646,rs4910981,0.072  
11,6.671,rs167948,0.084  
11,6.720,rs11032431,0.089  
11,6.844,rs2657147,0.102  
11,6.869,rs7129059,0.087  
11,6.884,rs4573672,0.088  
11,6.992,rs16923484,0.097  
11,7.004,rs10768149,0.098  
11,7.007,rs7937180,0.098  
11,7.019,rs3817098,0.099  
11,7.154,rs10836470,0.112  
11,7.155,rs10742359,0.113  
11,7.213,rs7108524,0.116  
11,7.270,rs7478759,0.121  
11,7.346,rs1865286,0.127  
11,7.455,rs7112101,0.137  
11,7.488,rs1469750,0.139  
11,7.505,rs840716,0.141  
11,7.536,rs2595993,0.144  
11,7.670,rs2499958,0.147  
11,7.818,rs1378736,0.179  
11,7.862,rs7116353,0.183  
11,7.880,rs6578548,0.182  
11,8.025,rs4512811,0.187  
11,8.078,rs2472528,0.179  
11,8.216,rs11602279,0.173  
11,8.250,rs11036212,0.164  
11,8.325,rs11036364,0.152  
11,8.359,rs10488678,0.149  
11,8.501,rs4601817,0.137  
11,8.545,rs3898917,0.150  
11,8.566,rs11036766,0.149  
11,8.573,rs7118086,0.148  
11,8.586,rs366533,0.133  
11,8.634,rs4910812,0.143  
11,8.720,rs7934354,0.111  
11,8.722,rs10769054,0.110  
11,8.822,rs2341434,0.127  
11,8.854,rs7117257,0.101  
11,8.876,rs6578665,0.096  
11,8.885,rs7108470,0.093  
11,9.046,rs7122620,0.096  
11,9.064,rs12808061,0.096  
11,9.109,rs3802980,0.094  
11,9.205,rs12285602,0.097  
11,9.223,rs11604371,0.098  
11,9.487,rs8181512,0.119  
11,9.510,rs4910851,0.119  
11,9.738,rs1453428,0.139  
11,9.774,rs11040807,0.155  
11,9.784,rs3750944,0.156  
11,9.905,rs1042048,0.155  
11,9.920,rs10769677,0.153  
11,9.946,rs6578752,0.128

11,9.963,rs11040851,0.128  
11,9.970,rs10839548,0.122  
11,9.975,rs2344350,0.134  
11,9.982,rs4758407,0.128  
11,10.000,rs2634184,0.115  
11,10.044,rs2171605,0.145  
11,10.168,rs1542705,0.190  
11,10.222,rs10839563,0.193  
11,10.226,rs1552513,0.193  
11,10.237,rs2723664,0.193  
11,10.279,rs4758417,0.197  
11,10.298,rs1906656,0.198  
11,10.485,rs10839574,0.226  
11,10.495,rs10734609,0.226  
11,10.512,rs11604481,0.220  
11,10.560,rs11040923,0.194  
11,10.742,rs7111291,0.135  
11,10.771,rs12294943,0.125  
11,10.827,rs1567135,0.137  
11,10.827,rs16917042,0.137  
11,11.023,rs670151,0.182  
11,11.264,rs7938371,0.236  
11,11.292,rs2741829,0.242  
11,11.361,rs12288515,0.221  
11,11.363,rs10839658,0.222  
11,11.411,rs11824633,0.231  
11,11.461,rs71117376,0.239  
11,11.496,rs2857917,0.235  
11,11.520,rs2515949,0.238  
11,11.669,rs10839708,0.243  
11,11.916,rs10500683,0.262  
11,12.014,rs7106726,0.275  
11,12.041,rs1487841,0.285  
11,12.073,rs11041273,0.286  
11,12.075,rs1552463,0.286  
11,12.172,rs1319309,0.292  
11,12.181,rs7948390,0.292  
11,12.188,rs2200651,0.292  
11,12.230,rs973108,0.293  
11,12.255,rs6578849,0.295  
11,12.335,rs2346828,0.313  
11,12.368,rs7938208,0.305  
11,12.372,rs7946655,0.290  
11,12.375,rs4757993,0.290  
11,12.412,rs4072103,0.274  
11,12.437,rs4758185,0.254  
11,12.455,rs11041401,0.246  
11,12.461,rs4351800,0.243  
11,12.478,rs4338502,0.238  
11,12.575,rs12791447,0.200  
11,12.593,rs4076808,0.190  
11,12.601,rs11041441,0.189  
11,12.656,rs6578885,0.181  
11,12.662,rs7933428,0.204  
11,12.677,rs9787734,0.184  
11,12.682,rs4758205,0.171  
11,12.697,rs3892335,0.151  
11,12.721,rs10769813,0.144  
11,12.857,rs10839843,0.116  
11,12.864,rs11041537,0.135  
11,13.236,rs10500702,0.066

11,13.254,rs7928132,0.063  
11,13.267,rs11041644,0.069  
11,13.282,rs16933545,0.064  
11,13.386,rs907203,0.061  
11,13.398,rs11041688,0.064  
11,13.414,rs12363522,0.068  
11,13.496,rs4758038,0.095  
11,13.499,rs12786251,0.095  
11,13.634,rs7932687,0.053  
11,13.659,rs4758040,0.038  
11,13.680,rs1317500,0.035  
11,13.764,rs4758295,0.026  
11,13.936,rs7927509,0.016  
11,13.943,rs4758051,0.016  
11,14.011,rs2311011,0.028  
11,14.030,rs204937,0.031  
11,14.072,rs7104520,0.035  
11,14.132,rs10840016,0.047  
11,14.134,rs897102,0.038  
11,14.141,rs7102266,0.059  
11,14.152,rs10840020,0.061  
11,14.231,rs4758350,0.044  
11,14.236,rs4237772,0.043  
11,14.428,rs12282398,0.043  
11,14.589,rs7105027,0.038  
11,14.622,rs10840070,0.038  
11,14.798,rs9633894,0.034  
11,15.465,rs2116513,0.037  
11,15.926,rs10840166,0.038  
11,15.984,rs2647528,0.034  
11,15.987,rs4910440,0.034  
11,16.006,rs10769990,0.033  
11,16.084,rs7116459,0.025  
11,16.143,rs7950276,0.029  
11,16.153,rs4910048,0.028  
11,16.186,rs7101776,0.027  
11,16.297,rs10770043,0.023  
11,16.371,rs431480,0.014  
11,16.385,rs1056593,0.015  
11,16.485,rs7950655,0.020  
11,16.551,rs17272751,0.021  
11,16.664,rs12278680,0.020  
11,16.748,rs1580004,0.020  
11,16.752,rs2957707,0.013  
11,16.766,rs2923088,0.001  
11,16.779,rs4909926,0.000  
11,16.783,rs10743138,0.000  
11,16.790,rs10840408,0.000  
11,16.806,rs1450270,0.000  
11,16.841,rs7125888,0.000  
11,16.847,rs10840427,0.000  
11,16.847,rs11042854,0.000  
11,16.849,rs4910146,0.000  
11,16.850,rs7932321,0.000  
11,16.873,rs7938782,0.000  
11,16.891,rs17403942,0.000  
11,16.915,rs16927077,0.000  
11,16.919,rs1017275,0.000  
11,16.942,rs7944136,-0.000  
11,16.945,rs2033049,-0.000  
11,17.202,rs11042939,0.000

11,17.209,rs4910184,0.000  
11,17.239,rs2279696,0.000  
11,17.256,rs12418180,-0.000  
11,17.277,rs10500731,-0.000  
11,17.422,rs771374,-0.004  
11,17.520,rs2896567,-0.003  
11,17.541,rs7947494,-0.002  
11,17.730,rs1386158,-0.003  
11,17.825,rs7938527,-0.004  
11,17.855,rs274503,-0.007  
11,17.881,rs924796,-0.010  
11,17.905,rs4909963,-0.010  
11,18.141,rs2655103,-0.011  
11,18.234,rs11043167,-0.012  
11,18.300,rs4408307,-0.021  
11,18.312,rs4576814,-0.024  
11,18.351,rs7935881,-0.031  
11,18.404,rs4910293,-0.040  
11,18.450,rs4910294,-0.040  
11,18.467,rs4559684,-0.040  
11,18.490,rs4910306,-0.043  
11,18.544,rs4909987,-0.040  
11,18.555,rs4910320,-0.042  
11,18.571,rs901555,-0.044  
11,18.586,rs11021810,-0.048  
11,18.593,rs9888138,-0.074  
11,18.599,rs1352239,-0.096  
11,18.667,rs3993153,-0.058  
11,18.680,rs10047474,-0.054  
11,18.703,rs10765844,-0.043  
11,18.766,rs7101677,-0.026  
11,18.817,rs901545,-0.019  
11,18.835,rs1023982,-0.017  
11,18.845,rs12363821,-0.018  
11,18.874,rs12278731,-0.018  
11,18.896,rs10831616,-0.020  
11,18.905,rs4910006,-0.027  
11,18.910,rs4910008,-0.041  
11,18.985,rs4910362,-0.048  
11,19.063,rs4550214,-0.041  
11,19.179,rs7126296,-0.026  
11,19.215,rs4910386,-0.022  
11,19.222,rs7118819,-0.021  
11,19.281,rs10765871,-0.019  
11,19.312,rs10765873,-0.020  
11,19.347,rs12283371,-0.016  
11,19.379,rs10765880,-0.017  
11,19.425,rs12803005,-0.026  
11,19.494,rs7480726,-0.028  
11,19.758,rs4910407,-0.051  
11,19.889,rs4910411,-0.052  
11,20.028,rs2054117,-0.052  
11,20.219,rs7108356,-0.047  
11,20.254,rs4910031,-0.046  
11,20.404,rs4757595,-0.040  
11,20.413,rs1038909,-0.022  
11,20.419,rs6485350,-0.020  
11,20.469,rs4500466,-0.024  
11,20.527,rs6485416,-0.019  
11,20.531,rs7928952,-0.021  
11,20.565,rs10831716,-0.031

11,20.578,rs17383023,-0.031  
11,20.627,rs3763820,-0.030  
11,20.643,rs4756772,-0.028  
11,20.660,rs10741566,-0.017  
11,20.660,rs4237703,-0.017  
11,20.674,rs977244,-0.012  
11,20.699,rs4644628,-0.011  
11,20.701,rs10831742,-0.006  
11,20.702,rs7102041,-0.005  
11,20.735,rs10741568,-0.005  
11,20.822,rs2012580,-0.003  
11,20.848,rs2706645,-0.005  
11,20.889,rs2706660,-0.007  
11,20.895,rs11022264,-0.005  
11,20.899,rs2270513,-0.004  
11,20.908,rs8808,-0.004  
11,20.910,rs903208,-0.004  
11,20.925,rs16910954,-0.005  
11,21.058,rs16911142,-0.001  
11,21.058,rs4757381,-0.001  
11,21.071,rs11022320,-0.001  
11,21.104,rs12365064,-0.001  
11,21.200,rs10831815,-0.001  
11,21.242,rs11022358,-0.000  
11,21.252,rs1365403,-0.001  
11,21.278,rs1991320,-0.001  
11,21.351,rs11022378,-0.003  
11,21.372,rs933930,-0.012  
11,21.389,rs7644,-0.013  
11,21.407,rs12421465,-0.015  
11,21.430,rs1863584,-0.027  
11,21.523,rs7121444,-0.037  
11,21.544,rs4237723,-0.041  
11,21.647,rs6485989,-0.047  
11,22.023,rs7115063,-0.079  
11,22.058,rs12364619,-0.093  
11,22.064,rs1440278,-0.088  
11,22.070,rs747113,-0.082  
11,22.073,rs745361,-0.082  
11,22.079,rs17503615,-0.085  
11,22.107,rs7929650,-0.100  
11,22.109,rs10831931,-0.100  
11,22.115,rs4485088,-0.101  
11,22.158,rs16911996,-0.116  
11,22.169,rs977169,-0.120  
11,22.194,rs7117526,-0.140  
11,22.203,rs10766048,-0.149  
11,22.220,rs1481871,-0.142  
11,22.229,rs748923,-0.147  
11,22.232,rs16912392,-0.149  
11,22.256,rs12795870,-0.160  
11,22.262,rs11607529,-0.163  
11,22.344,rs7950226,-0.154  
11,22.438,rs6486121,-0.155  
11,22.511,rs3789327,-0.180  
11,22.575,rs11022817,-0.192  
11,22.612,rs7129719,-0.182  
11,22.657,rs1507533,-0.171  
11,22.666,rs4756771,-0.170  
11,22.716,rs1027837,-0.163  
11,22.729,rs1919299,-0.156

11,22.788,rs10832164,-0.158  
11,22.810,rs7104613,-0.150  
11,22.900,rs4756776,-0.149  
11,23.076,rs7935792,-0.151  
11,23.090,rs1562902,-0.151  
11,23.118,rs12416759,-0.147  
11,23.399,rs756152,-0.105  
11,23.443,rs4492803,-0.156  
11,23.472,rs1792537,-0.143  
11,23.498,rs1612783,-0.125  
11,23.562,rs4343008,-0.114  
11,23.586,rs16931247,-0.123  
11,23.610,rs2156827,-0.132  
11,23.615,rs10832444,-0.139  
11,24.006,rs12365254,-0.164  
11,24.055,rs1484444,-0.129  
11,24.172,rs923031,-0.099  
11,24.236,rs7112764,-0.090  
11,24.270,rs12576777,-0.093  
11,24.332,rs1440703,-0.101  
11,24.353,rs2615040,-0.100  
11,24.434,rs4237711,-0.098  
11,24.462,rs7942880,-0.098  
11,24.478,rs11023830,-0.097  
11,24.643,rs1840422,-0.102  
11,24.650,rs12360975,-0.102  
11,24.731,rs1949481,-0.101  
11,24.875,rs1866109,-0.098  
11,25.009,rs7937011,-0.094  
11,25.355,rs217765,-0.077  
11,25.363,rs12577561,-0.076  
11,25.398,rs216496,-0.075  
11,25.406,rs1027617,-0.075  
11,25.408,rs4756865,-0.085  
11,25.576,rs6486330,-0.076  
11,25.579,rs1544506,-0.075  
11,25.629,rs10741725,-0.092  
11,25.672,rs2285676,-0.069  
11,25.675,rs8192690,-0.069  
11,25.685,rs2074309,-0.056  
11,25.690,rs2237988,-0.056  
11,25.727,rs2074308,-0.059  
11,25.803,rs7950189,-0.067  
11,25.954,rs3758953,-0.100  
11,26.011,rs7129639,-0.090  
11,26.150,rs11603262,-0.102  
11,26.330,rs4757544,-0.141  
11,26.410,rs7106548,-0.169  
11,26.448,rs7107242,-0.168  
11,26.965,rs10766419,-0.159  
11,27.242,rs2299636,-0.162  
11,27.288,rs2283250,-0.140  
11,27.367,rs2237929,-0.142  
11,27.381,rs7119188,-0.142  
11,27.401,rs529191,-0.143  
11,27.546,rs1079785,-0.152  
11,27.614,rs2468849,-0.153  
11,27.647,rs2468826,-0.137  
11,27.654,rs2468821,-0.132  
11,27.696,rs16935005,-0.105  
11,27.698,rs2468812,-0.105

11,27.743,rs1520887,-0.097  
11,27.744,rs12282742,-0.096  
11,27.757,rs2045272,-0.091  
11,27.799,rs7128017,-0.078  
11,27.864,rs4150667,-0.076  
11,27.883,rs7946331,-0.053  
11,28.002,rs2132302,-0.059  
11,28.049,rs2271079,-0.065  
11,28.179,rs4757695,-0.083  
11,28.204,rs10832971,-0.083  
11,28.229,rs10832973,-0.078  
11,28.233,rs2278734,-0.078  
11,28.248,rs4756961,-0.078  
11,28.262,rs921082,-0.078  
11,28.284,rs4074853,-0.096  
11,28.302,rs12577551,-0.110  
11,28.390,rs2086698,-0.101  
11,28.519,rs2170655,-0.098  
11,28.571,rs7109068,-0.123  
11,28.637,rs11025018,-0.125  
11,28.690,rs10833066,-0.123  
11,28.700,rs1503501,-0.123  
11,28.704,rs4757767,-0.122  
11,28.730,rs10766536,-0.100  
11,28.776,rs2292061,-0.104  
11,28.803,rs12273302,-0.105  
11,28.935,rs4237740,-0.110  
11,29.074,rs1648222,-0.119  
11,29.184,rs10734274,-0.123  
11,29.410,rs2702703,-0.131  
11,29.454,rs4353249,-0.132  
11,29.461,rs2702671,-0.131  
11,29.465,rs2702676,-0.131  
11,29.567,rs4756999,-0.088  
11,29.715,rs1055543,-0.100  
11,29.748,rs2702646,-0.081  
11,29.779,rs10500854,-0.080  
11,29.843,rs1487198,-0.070  
11,29.863,rs1487204,-0.066  
11,29.965,rs1487180,-0.068  
11,30.690,rs2012651,-0.069  
11,30.998,rs2278132,-0.080  
11,31.299,rs10833162,-0.092  
11,31.329,rs11025239,-0.094  
11,31.436,rs11025246,-0.096  
11,31.562,rs2896583,-0.095  
11,31.704,rs918988,-0.102  
11,31.884,rs1425235,-0.110  
11,31.930,rs4757851,-0.108  
11,32.086,rs1443118,-0.100  
11,32.404,rs2218329,-0.115  
11,32.472,rs2028603,-0.116  
11,32.607,rs4757857,-0.100  
11,32.947,rs11025333,-0.112  
11,33.162,rs10766610,-0.140  
11,33.400,rs10500866,-0.156  
11,33.402,rs10833218,-0.151  
11,33.404,rs4757879,-0.131  
11,33.410,rs10741808,-0.156  
11,33.593,rs2584834,-0.146  
11,33.784,rs7125647,-0.159



11,33.883,rs1372796,-0.151  
11,33.943,rs1978947,-0.146  
11,33.947,rs12785600,-0.127  
11,33.979,rs7951443,-0.149  
11,33.985,rs6483640,-0.150  
11,34.151,rs1837971,-0.121  
11,34.181,rs2243437,-0.118  
11,34.233,rs2246192,-0.141  
11,34.239,rs11025397,-0.138  
11,34.285,rs831471,-0.100  
11,34.289,rs12280260,-0.098  
11,34.294,rs1442717,-0.097  
11,34.317,rs831460,-0.093  
11,34.329,rs831464,-0.092  
11,34.372,rs1520910,-0.087  
11,34.418,rs11025430,-0.098  
11,34.470,rs7127406,-0.108  
11,34.530,rs10458884,-0.111  
11,34.553,rs10833272,-0.111  
11,34.600,rs1108001,-0.111  
11,34.672,rs2132964,-0.112  
11,35.029,rs11025608,-0.115  
11,35.120,rs894747,-0.110  
11,35.150,rs7119457,-0.110  
11,35.153,rs10766703,-0.110  
11,35.208,rs7127159,-0.104  
11,35.209,rs10466424,-0.103  
11,35.222,rs1792971,-0.097  
11,35.314,rs10766719,-0.055  
11,35.527,rs16906988,-0.056  
11,35.591,rs12270126,-0.052  
11,35.668,rs2040316,-0.052  
11,35.724,rs11025878,-0.064  
11,35.733,rs1914249,-0.064  
11,35.752,rs7937542,-0.064  
11,35.754,rs11025886,-0.064  
11,35.772,rs16907379,-0.060  
11,35.813,rs1894054,-0.053  
11,35.818,rs7110500,-0.052  
11,35.891,rs10766769,-0.054  
11,35.925,rs11025951,-0.068  
11,35.939,rs7940204,-0.069  
11,35.974,rs1670644,-0.066  
11,36.023,rs1670638,-0.053  
11,36.039,rs11025990,-0.068  
11,36.039,rs12805365,-0.080  
11,36.040,rs1454001,-0.084  
11,36.040,rs10766778,-0.083  
11,36.041,rs1945331,-0.082  
11,36.060,rs10766779,-0.063  
11,36.156,rs4923528,-0.058  
11,36.159,rs4399327,-0.045  
11,36.188,rs1894090,-0.047  
11,36.190,rs11026038,-0.047  
11,36.213,rs7926858,-0.038  
11,36.219,rs4923569,-0.048  
11,36.224,rs7949183,-0.048  
11,36.230,rs16908013,-0.044  
11,36.254,rs10160607,-0.032  
11,36.255,rs7109477,-0.031  
11,36.273,rs10833525,-0.004

11,36.274,rs1981410,-0.003  
11,36.285,rs11026074,-0.002  
11,36.285,rs883128,-0.002  
11,36.292,rs10833529,-0.010  
11,36.336,rs1945410,-0.010  
11,36.432,rs11026122,-0.013  
11,36.496,rs11026133,-0.015  
11,36.530,rs1945569,-0.024  
11,36.535,rs11602745,-0.024  
11,36.560,rs7127820,-0.025  
11,36.599,rs7129113,-0.027  
11,36.606,rs4492823,-0.027  
11,36.744,rs1459873,-0.026  
11,36.957,rs4922945,-0.005  
11,37.040,rs1487814,-0.006  
11,37.151,rs324178,-0.001  
11,37.216,rs10500921,-0.001  
11,37.233,rs16909097,-0.001  
11,37.299,rs7358426,-0.000  
11,37.635,rs7946568,0.001  
11,37.684,rs11026531,0.002  
11,37.808,rs2665675,0.008  
11,37.858,rs16909564,0.009  
11,37.887,rs925633,0.010  
11,37.903,rs10833766,0.010  
11,37.982,rs16909703,0.005  
11,38.008,rs1355889,0.006  
11,38.122,rs1479896,0.014  
11,38.143,rs91294,0.016  
11,38.257,rs4307722,0.012  
11,38.282,rs2041466,0.012  
11,38.486,rs7113718,0.034  
11,38.569,rs11026887,0.036  
11,38.657,rs2468638,0.043  
11,38.722,rs7119653,0.048  
11,38.761,rs7933654,0.051  
11,38.766,rs4578382,0.051  
11,38.834,rs2449429,0.055  
11,38.897,rs11027083,0.060  
11,38.946,rs10500951,0.064  
11,39.005,rs7931150,0.069  
11,39.198,rs7935052,0.048  
11,39.294,rs16911459,0.058  
11,39.333,rs1519423,0.070  
11,39.395,rs7128154,0.075  
11,39.401,rs11823466,0.074  
11,39.472,rs11027415,0.053  
11,39.474,rs10500966,0.048  
11,39.539,rs12272427,0.046  
11,39.623,rs4317983,0.050  
11,39.631,rs4923127,0.050  
11,39.741,rs11027552,0.055  
11,39.775,rs7123551,0.055  
11,39.837,rs10834232,0.057  
11,39.846,rs7930839,0.057  
11,39.997,rs10500973,0.059  
11,40.065,rs2139518,0.050  
11,40.071,rs10767156,0.051  
11,40.129,rs1915061,0.041  
11,40.168,rs2403896,0.045  
11,40.218,rs4923162,0.046

11,40.461,rs11027822,0.025  
11,40.485,rs10834318,0.024  
11,40.493,rs7928698,0.024  
11,40.764,rs7943454,0.022  
11,40.938,rs1858156,0.024  
11,41.154,rs7395433,0.012  
11,41.163,rs4604884,0.011  
11,41.167,rs12099324,0.011  
11,41.193,rs10834449,0.008  
11,41.213,rs10834460,0.005  
11,41.215,rs2716461,0.004  
11,41.217,rs10500989,0.004  
11,41.229,rs17235001,0.005  
11,41.230,rs1906099,0.005  
11,41.236,rs1386253,0.004  
11,41.262,rs2716441,0.007  
11,41.354,rs10834486,0.005  
11,41.387,rs7120732,0.008  
11,41.390,rs1486688,0.008  
11,41.407,rs2631506,0.007  
11,41.433,rs2716509,0.006  
11,41.477,rs1960472,0.004  
11,41.492,rs16913433,0.003  
11,41.626,rs7481112,0.003  
11,41.840,rs1446160,0.004  
11,41.870,rs12805702,0.004  
11,42.011,rs2162164,0.005  
11,42.072,rs2059541,0.008  
11,42.133,rs2404060,0.007  
11,42.399,rs882258,0.003  
11,42.452,rs11028833,0.000  
11,42.455,rs1389412,0.000  
11,42.665,rs1441504,0.001  
11,42.692,rs11603501,0.001  
11,42.781,rs2033976,0.002  
11,42.805,rs1348165,0.002  
11,42.931,rs12363688,0.005  
11,43.020,rs11029147,0.003  
11,43.081,rs3108814,0.002  
11,43.290,rs11029525,0.007  
11,43.312,rs10834970,0.007  
11,43.313,rs10834971,0.007  
11,43.322,rs716701,0.006  
11,43.461,rs1389460,0.006  
11,43.472,rs4274172,0.006  
11,43.509,rs10834998,0.006  
11,43.555,rs12418975,0.006  
11,43.583,rs2131691,0.007  
11,43.640,rs7930308,0.009  
11,43.645,rs10835072,0.010  
11,43.781,rs12279221,0.010  
11,43.824,rs12362707,0.012  
11,43.831,rs16916399,0.012  
11,43.836,rs10835093,0.006  
11,43.850,rs1445325,0.007  
11,44.001,rs12277945,0.015  
11,44.027,rs7939668,0.016  
11,44.040,rs12294703,0.019  
11,44.064,rs10835138,0.024  
11,44.114,rs7479309,0.024  
11,44.248,rs12271278,0.048

11,44.268,rs7945211,0.049  
11,44.504,rs12273363,0.046  
11,44.504,rs908867,0.046  
11,44.519,rs2172229,0.051  
11,44.525,rs10501091,0.053  
11,44.525,rs10501089,0.053  
11,44.539,rs1491864,0.060  
11,44.592,rs4923506,0.078  
11,44.653,rs10458896,0.078  
11,44.659,rs11030196,0.077  
11,44.735,rs17310125,0.068  
11,44.885,rs11030363,0.053  
11,44.934,rs11030393,0.049  
11,44.958,rs2355996,0.056  
11,44.990,rs548797,0.071  
11,45.043,rs2945096,0.080  
11,45.271,rs7114955,0.066  
11,45.447,rs1502447,0.052  
11,45.500,rs4447203,0.052  
11,45.535,rs7481118,0.050  
11,45.635,rs2356579,0.046  
11,45.689,rs541109,0.044  
11,45.744,rs1009070,0.041  
11,45.746,rs1231637,0.041  
11,45.907,rs324299,0.028  
11,46.064,rs9300005,0.023  
11,46.140,rs1764528,0.018  
11,46.422,rs1026477,0.003  
11,46.555,rs811210,0.001  
11,46.594,rs16920925,0.002  
11,46.631,rs533824,0.003  
11,46.696,rs2593549,0.005  
11,46.741,rs16921067,0.011  
11,46.742,rs12295670,0.011  
11,46.744,rs294354,0.011  
11,46.773,rs1447267,0.008  
11,46.796,rs294363,0.006  
11,46.880,rs638196,0.005  
11,47.080,rs459581,0.002  
11,47.193,rs1232186,0.003  
11,47.283,rs662702,0.005  
11,47.337,rs682572,0.004  
11,47.365,rs224597,0.003  
11,47.388,rs224663,0.006  
11,47.394,rs10767910,0.006  
11,47.406,rs224619,0.012  
11,47.409,rs2745882,0.012  
11,47.418,rs881183,0.012  
11,47.440,rs4922579,0.013  
11,47.480,rs989570,0.017  
11,47.492,rs1467459,0.011  
11,47.506,rs12417249,0.011  
11,47.513,rs7481082,0.012  
11,47.538,rs910514,0.008  
11,47.556,rs1884232,0.009  
11,47.590,rs12293750,0.010  
11,47.615,rs2067666,0.010  
11,47.624,rs11031821,0.010  
11,47.639,rs17749506,0.014  
11,47.652,rs1872706,0.017  
11,47.752,rs7107642,0.025

11,47.766,rs198270,0.026  
11,47.796,rs7933966,0.028  
11,47.924,rs1064005,0.030  
11,48.026,rs2474871,0.024  
11,48.189,rs16924091,0.016  
11,48.198,rs4388862,0.016  
11,48.332,rs11032242,0.017  
11,48.377,rs7929907,0.015  
11,48.398,rs2615919,0.012  
11,48.407,rs2615945,0.011  
11,48.767,rs10768011,0.003  
11,48.859,rs12290650,0.004  
11,48.868,rs10742304,0.004  
11,49.062,rs3817442,0.010  
11,49.402,rs2038602,0.009  
11,49.879,rs2273799,0.013  
11,50.198,rs7119405,0.016  
11,50.404,rs2181165,0.018  
11,50.493,rs7119163,0.026  
11,50.501,rs7941690,0.030  
11,50.509,rs7121633,0.034  
11,50.537,rs12419404,0.041  
11,50.549,rs2143868,0.044  
11,50.551,rs9666645,0.046  
11,50.553,rs2957497,0.048  
11,50.557,rs2746628,0.042  
11,50.560,rs1033752,0.032  
11,50.561,rs4756119,0.033  
11,50.568,rs2611145,0.026  
11,50.569,rs2755167,0.028  
11,50.572,rs1967745,0.032  
11,50.576,rs2755147,0.039  
11,50.578,rs2955957,0.034  
11,50.579,rs12289087,0.033  
11,50.580,rs2611140,0.029  
11,50.580,rs1267471,0.020  
11,50.588,rs2078165,0.022  
11,50.597,rs997704,0.033  
11,50.621,rs1000768,0.052  
11,50.626,rs836141,0.079  
11,50.628,rs11032742,0.082  
11,50.632,rs3886899,0.087  
11,50.637,rs16925781,0.087  
11,50.961,rs1024276,0.069  
11,51.012,rs2167906,0.055  
11,51.014,rs286925,0.054  
11,51.020,rs10768085,0.053  
11,51.027,rs7936502,0.062  
11,51.029,rs3794155,0.065  
11,51.097,rs7121272,0.048  
11,51.350,rs2956103,0.055  
11,51.520,rs2732521,0.034  
11,51.551,rs890242,0.031  
11,51.574,rs2732547,0.030  
11,51.641,rs404977,0.023  
11,51.743,rs4756196,0.036  
11,51.749,rs11033019,0.035  
11,51.771,rs10128562,0.030  
11,51.772,rs16927061,0.029  
11,51.773,rs7115768,0.029  
11,51.848,rs10836355,0.016

11,52.026,rs1320443,0.012  
11,52.062,rs7120564,0.011  
11,52.122,rs1923295,0.009  
11,52.124,rs16927467,0.009  
11,52.193,rs11602786,0.010  
11,52.205,rs16927508,0.011  
11,52.219,rs4756234,0.017  
11,52.271,rs589475,0.006  
11,52.276,rs695121,0.006  
11,52.301,rs632358,0.006  
11,52.307,rs697317,0.006  
11,52.345,rs3911014,0.001  
11,52.422,rs697316,0.002  
11,52.605,rs11033260,0.000  
11,52.765,rs2956340,-0.002  
11,52.772,rs2956343,-0.002  
11,52.775,rs676184,-0.002  
11,52.784,rs11827345,-0.002  
11,52.803,rs684909,-0.002  
11,52.838,rs671658,-0.003  
11,52.907,rs4540821,-0.006  
11,52.928,rs263096,-0.009  
11,52.942,rs2984699,-0.011  
11,53.076,rs1499512,-0.011  
11,53.090,rs4265577,-0.012  
11,53.133,rs3740962,-0.021  
11,53.143,rs2030834,-0.017  
11,53.154,rs16928390,-0.018  
11,53.160,rs10836489,-0.018  
11,53.173,rs1961758,-0.018  
11,53.214,rs10501145,-0.020  
11,53.240,rs867718,-0.019  
11,53.279,rs7924470,-0.018  
11,53.287,rs12269916,-0.018  
11,53.324,rs4755440,-0.023  
11,53.491,rs7109505,-0.038  
11,53.569,rs11033546,-0.039  
11,53.616,rs12419146,-0.039  
11,53.623,rs1900337,-0.038  
11,53.675,rs2162195,-0.029  
11,53.697,rs2554012,-0.031  
11,53.704,rs3812774,-0.031  
11,53.730,rs4077044,-0.032  
11,53.748,rs330260,-0.032  
11,53.762,rs7103677,-0.034  
11,53.795,rs7107720,-0.033  
11,53.820,rs4756316,-0.034  
11,53.860,rs11033637,-0.041  
11,53.925,rs5030472,-0.044  
11,54.260,rs10742376,-0.043  
11,54.505,rs11603790,-0.033  
11,54.812,rs986996,-0.024  
11,54.891,rs4304747,-0.024  
11,55.306,rs388750,-0.021  
11,55.433,rs2089917,-0.019  
11,55.582,rs1512371,-0.031  
11,55.663,rs7946463,-0.023  
11,55.691,rs11033958,-0.025  
11,55.789,rs10768256,-0.029  
11,55.796,rs11034021,-0.031  
11,55.827,rs2177216,-0.039

11,55.955,rs10768268,-0.035  
11,56.047,rs1515038,-0.034  
11,56.063,rs292801,-0.033  
11,56.101,rs292774,-0.042  
11,56.134,rs1478762,-0.039  
11,56.153,rs4408282,-0.034  
11,56.179,rs11034562,-0.025  
11,56.241,rs2127541,-0.020  
11,56.270,rs11034623,-0.016  
11,56.329,rs12420552,-0.010  
11,56.390,rs7118523,-0.007  
11,56.413,rs10444236,-0.006  
11,56.496,rs12279967,-0.003  
11,56.511,rs4237674,-0.003  
11,56.606,rs4237676,-0.002  
11,56.637,rs4315042,-0.000  
11,56.811,rs2169415,0.002  
11,56.848,rs12224631,0.004  
11,56.868,rs10768556,0.004  
11,57.004,rs1462183,0.011  
11,57.023,rs7123778,0.012  
11,57.027,rs16934335,0.020  
11,57.037,rs3109384,0.014  
11,57.051,rs2953310,0.011  
11,57.061,rs1381567,0.019  
11,57.080,rs10160235,0.029  
11,57.085,rs11035719,0.032  
11,57.092,rs1020579,0.047  
11,57.094,rs16934668,0.048  
11,57.189,rs7103883,0.061  
11,57.390,rs16934838,0.052  
11,57.480,rs355241,0.048  
11,57.551,rs10837565,0.055  
11,57.569,rs10501249,0.057  
11,57.582,rs7106877,0.060  
11,57.670,rs2902115,0.071  
11,57.727,rs10501259,0.068  
11,57.848,rs10837640,0.073  
11,57.970,rs10768696,0.084  
11,58.038,rs7930633,0.118  
11,58.062,rs10501273,0.118  
11,58.149,rs287756,0.111  
11,58.221,rs7128034,0.132  
11,58.282,rs2862466,0.147  
11,58.354,rs3861059,0.157  
11,58.366,rs16936642,0.155  
11,58.496,rs7114911,0.161  
11,58.557,rs11604506,0.162  
11,58.581,rs7118795,0.159  
11,58.683,rs7125369,0.141  
11,58.730,rs4391804,0.133  
11,58.799,rs7939657,0.111  
11,58.956,rs977439,0.097  
11,59.029,rs7107014,0.099  
11,59.170,rs17510173,0.110  
11,59.195,rs10838120,0.112  
11,59.200,rs16937562,0.113  
11,59.206,rs10400240,0.113  
11,59.214,rs3740981,0.114  
11,59.221,rs11037472,0.116  
11,59.238,rs11037478,0.119

11,59.358,rs10501303,0.142  
11,59.396,rs7932905,0.148  
11,59.565,rs1518820,0.133  
11,59.569,rs11037684,0.132  
11,59.572,rs11037685,0.132  
11,59.588,rs10838191,0.126  
11,59.595,rs2434467,0.124  
11,59.645,rs883856,0.101  
11,59.658,rs7120772,0.097  
11,59.749,rs7942915,0.065  
11,59.765,rs7127815,0.063  
11,59.788,rs3094395,0.058  
11,59.807,rs178503,0.056  
11,59.838,rs3107275,0.042  
11,59.927,rs7111879,0.041  
11,60.407,rs7949067,0.059  
11,60.429,rs10769029,0.058  
11,60.485,rs3853292,0.055  
11,60.504,rs4755809,0.052  
11,60.568,rs4755811,0.066  
11,60.580,rs2220885,0.067  
11,60.645,rs3853291,0.056  
11,60.718,rs746718,0.048  
11,60.832,rs897012,0.042  
11,61.047,rs357938,0.039  
11,61.062,rs6485532,0.037  
11,61.112,rs1560295,0.033  
11,61.359,rs730129,0.020  
11,61.371,rs1981992,0.020  
11,61.393,rs7932712,0.022  
11,61.441,rs3781753,0.009  
11,61.460,rs7935166,0.007  
11,61.471,rs12421108,0.005  
11,61.499,rs4755854,0.002  
11,61.513,rs714679,0.005  
11,61.524,rs12420889,0.005  
11,61.628,rs7935663,0.007  
11,61.637,rs7123370,0.007  
11,61.687,rs4755868,0.009  
11,61.908,rs4394833,0.010  
11,62.523,rs835784,0.003  
11,62.691,rs835750,-0.000  
11,62.694,rs1466199,-0.000  
11,62.797,rs4755910,-0.002  
11,62.810,rs835774,-0.001  
11,62.831,rs2902421,-0.000  
11,62.869,rs1351848,-0.009  
11,62.890,rs10769111,-0.012  
11,63.000,rs751198,-0.020  
11,63.022,rs11038387,-0.019  
11,63.061,rs4755319,-0.016  
11,63.071,rs7930399,-0.016  
11,63.240,rs1026078,-0.007  
11,63.288,rs7106761,-0.004  
11,63.331,rs11823366,-0.003  
11,63.343,rs11038673,-0.002  
11,63.375,rs12281674,-0.002  
11,63.446,rs2959101,-0.001  
11,63.533,rs2863720,0.000  
11,63.546,rs10437653,0.000  
11,63.654,rs11038993,-0.001



11,63.730,rs752849,-0.001  
11,63.755,rs7114704,-0.001  
11,63.798,rs2242081,-0.000  
11,63.812,rs1164681,-0.001  
11,63.911,rs11245742,-0.007  
11,63.991,rs11228726,-0.008  
11,64.036,rs764855,-0.007  
11,64.053,rs1792509,-0.008  
11,64.125,rs3017569,-0.016  
11,64.151,rs17151797,-0.020  
11,64.181,rs3781902,-0.023  
11,64.191,rs3741089,-0.023  
11,64.210,rs2955849,-0.006  
11,64.212,rs10792168,-0.007  
11,64.347,rs517679,0.000  
11,64.349,rs948559,0.001  
11,64.350,rs667933,0.002  
11,64.356,rs619945,0.000  
11,64.403,rs10896825,-0.000  
11,64.467,rs17578360,-0.000  
11,64.474,rs524585,-0.000  
11,64.478,rs532318,0.000  
11,64.586,rs4411292,-0.000  
11,64.627,rs12284698,-0.000  
11,64.664,rs11229898,-0.000  
11,64.668,rs7949688,0.000  
11,64.763,rs6591536,0.001  
11,64.910,rs7116484,-0.000  
11,64.940,rs17154203,-0.000  
11,64.955,rs7925914,0.000  
11,64.981,rs559335,0.001  
11,65.025,rs1286386,0.003  
11,65.185,rs667897,0.007  
11,65.325,rs2017549,0.016  
11,65.397,rs2165832,0.018  
11,65.539,rs2000636,0.015  
11,65.651,rs10501386,0.018  
11,65.717,rs11230420,0.020  
11,65.913,rs10736710,0.022  
11,65.925,rs1032939,0.022  
11,65.938,rs4939451,0.024  
11,65.962,rs7120524,0.026  
11,66.064,rs592637,0.013  
11,66.651,rs485639,0.007  
11,66.715,rs473756,0.015  
11,66.846,rs11230553,0.018  
11,66.893,rs2237997,0.017  
11,66.997,rs2905524,0.015  
11,67.150,rs175129,0.012  
11,67.590,rs590494,0.001  
11,67.878,rs17704641,0.003  
11,67.920,rs3019200,0.003  
11,67.941,rs3741260,0.004  
11,67.955,rs1794072,0.004  
11,68.046,rs7931563,0.004  
11,68.081,rs198448,0.004  
11,68.096,rs198462,0.004  
11,68.171,rs174450,-0.002  
11,68.203,rs882169,-0.007  
11,68.224,rs741886,-0.008  
11,68.231,rs2073588,-0.008

11,68.252,rs4963442,-0.008  
11,68.269,rs10792327,-0.013  
11,68.272,rs11230882,-0.014  
11,68.344,rs7129085,-0.008  
11,68.362,rs1675090,-0.006  
11,68.382,rs2463838,-0.012  
11,68.514,rs2509973,-0.013  
11,68.528,rs17663676,-0.012  
11,68.528,rs4084164,-0.012  
11,68.534,rs10897276,-0.010  
11,68.540,rs2509984,-0.005  
11,68.551,rs2513044,-0.001  
11,68.563,rs17157338,-0.000  
11,68.656,rs11231168,0.000  
11,68.748,rs633742,0.000  
11,68.799,rs12794763,0.000  
11,68.824,rs547248,0.000  
11,68.845,rs1938677,0.001  
11,68.904,rs10897316,0.001  
11,68.943,rs1944047,0.003  
11,69.010,rs1525071,0.004  
11,69.214,rs537473,0.005  
11,69.355,rs948796,0.005  
11,69.391,rs4405320,0.002  
11,69.593,rs503341,-0.001  
11,69.612,rs3850942,-0.001  
11,69.720,rs11231657,-0.003  
11,69.798,rs562750,-0.004  
11,69.829,rs715163,-0.004  
11,69.970,rs3741403,-0.006  
11,69.995,rs2244625,-0.003  
11,70.156,rs606063,-0.011  
11,70.266,rs3759053,-0.012  
11,70.483,rs10897526,-0.033  
11,70.540,rs8855,-0.036  
11,70.612,rs3741392,-0.049  
11,70.613,rs673995,-0.049  
11,70.678,rs7103328,-0.051  
11,70.783,rs1196043,-0.056  
11,70.832,rs1195962,-0.054  
11,71.025,rs681309,-0.051  
11,71.130,rs619586,-0.053  
11,71.306,rs11227259,-0.055  
11,71.391,rs479844,-0.059  
11,71.416,rs11227306,-0.047  
11,71.543,rs1211380,-0.045  
11,71.546,rs754532,-0.045  
11,71.575,rs2576,-0.045  
11,71.697,rs4930351,-0.039  
11,71.984,rs6591226,-0.030  
11,71.984,rs11227623,-0.030  
11,72.063,rs11227678,-0.020  
11,72.135,rs3741189,-0.013  
11,72.170,rs1944096,-0.011  
11,72.299,rs308328,-0.001  
11,72.361,rs3794186,-0.001  
11,72.471,rs2129848,-0.000  
11,72.817,rs312783,0.001  
11,73.095,rs2472429,0.001  
11,73.320,rs12804775,0.000  
11,73.606,rs3136537,0.000

11,73.871,rs4930248,0.000  
11,73.885,rs2924674,0.000  
11,74.169,rs685320,-0.000  
11,74.297,rs10896389,-0.001  
11,74.353,rs3862397,-0.001  
11,74.421,rs17399246,-0.002  
11,74.557,rs1005858,-0.005  
11,74.652,rs11603027,-0.010  
11,74.668,rs11228515,-0.009  
11,74.714,rs3019751,-0.008  
11,74.882,rs7931342,-0.007  
11,74.943,rs7118204,-0.008  
11,75.022,rs11602680,-0.009  
11,75.304,rs4326823,-0.005  
11,75.409,rs4980777,-0.002  
11,75.441,rs4980598,-0.001  
11,75.474,rs7927237,-0.000  
11,75.491,rs10908183,-0.001  
11,75.530,rs10501399,-0.001  
11,75.559,rs3740643,0.000  
11,75.681,rs498931,-0.000  
11,75.774,rs17318844,-0.000  
11,75.832,rs1982774,-0.000  
11,75.864,rs649392,-0.000  
11,75.870,rs7178,-0.000  
11,75.934,rs948992,-0.002  
11,75.963,rs11263535,-0.002  
11,75.993,rs7105655,-0.003  
11,76.040,rs871346,-0.003  
11,76.089,rs4980700,-0.003  
11,76.096,rs734102,-0.003  
11,76.167,rs6598087,-0.004  
11,76.183,rs7481015,-0.008  
11,76.210,rs7950402,-0.008  
11,76.373,rs7926926,-0.005  
11,76.386,rs4980704,-0.006  
11,76.414,rs4980573,-0.007  
11,76.446,rs7927315,-0.011  
11,76.462,rs7947135,-0.011  
11,76.540,rs744205,-0.012  
11,76.544,rs2515284,-0.013  
11,76.581,rs9666157,-0.016  
11,76.600,rs2515258,-0.018  
11,76.608,rs2509172,-0.019  
11,76.651,rs875106,-0.023  
11,76.653,rs10793022,-0.023  
11,76.809,rs7118496,-0.031  
11,77.351,rs682670,-0.094  
11,77.426,rs11236566,-0.097  
11,77.436,rs4980608,-0.088  
11,77.456,rs7106631,-0.084  
11,77.485,rs7945862,-0.092  
11,77.507,rs4980543,-0.105  
11,77.515,rs12225113,-0.106  
11,77.546,rs515458,-0.105  
11,77.625,rs1783611,-0.122  
11,77.670,rs10899444,-0.124  
11,77.678,rs1562191,-0.124  
11,77.743,rs7946750,-0.123  
11,77.798,rs7927376,-0.139  
11,77.847,rs4944840,-0.139

11,77.885,rs11604398,-0.120  
11,77.902,rs7124405,-0.134  
11,77.910,rs3934692,-0.132  
11,77.928,rs7929059,-0.132  
11,77.950,rs2919721,-0.122  
11,78.081,rs3763856,-0.044  
11,78.185,rs7934055,-0.020  
11,78.200,rs7937196,-0.019  
11,78.261,rs7102783,-0.014  
11,78.428,rs661242,-0.015  
11,78.637,rs522381,-0.016  
11,78.691,rs11235468,-0.018  
11,78.749,rs638138,-0.017  
11,78.793,rs1160142,-0.018  
11,78.825,rs4943909,-0.018  
11,78.832,rs163607,-0.018  
11,78.845,rs341093,-0.020  
11,78.850,rs12418204,-0.021  
11,78.853,rs341081,-0.022  
11,78.855,rs7122222,-0.022  
11,78.857,rs341069,-0.023  
11,78.878,rs341086,-0.018  
11,79.074,rs1157343,-0.025  
11,79.119,rs10793039,-0.026  
11,79.257,rs1000620,-0.026  
11,79.692,rs10898894,-0.022  
11,80.095,rs1791936,-0.018  
11,80.157,rs3931643,-0.038  
11,80.165,rs11235676,-0.036  
11,80.177,rs523907,-0.030  
11,80.224,rs12364461,-0.037  
11,80.230,rs1790080,-0.038  
11,80.265,rs4382936,-0.029  
11,80.337,rs2027765,-0.031  
11,80.467,rs513268,-0.057  
11,80.677,rs655717,-0.075  
11,80.690,rs3781907,-0.075  
11,80.874,rs3862800,-0.102  
11,80.880,rs9516,-0.101  
11,80.883,rs4944893,-0.100  
11,80.926,rs7941941,-0.068  
11,80.963,rs7932922,-0.056  
11,80.979,rs2000924,-0.052  
11,80.983,rs4539352,-0.057  
11,80.989,rs1433769,-0.083  
11,81.022,rs572656,-0.105  
11,81.074,rs590105,-0.120  
11,81.173,rs10899076,-0.101  
11,81.178,rs17133760,-0.083  
11,81.180,rs3819192,-0.078  
11,81.180,rs1789694,-0.077  
11,81.183,rs472112,-0.069  
11,81.183,rs685929,-0.068  
11,81.184,rs616714,-0.065  
11,81.184,rs2510894,-0.062  
11,81.185,rs12289289,-0.056  
11,81.186,rs479574,-0.044  
11,81.188,rs12788428,-0.033  
11,81.294,rs540461,-0.018  
11,81.565,rs11236561,-0.009  
11,81.720,rs1995892,-0.006

11,82.020,rs660211,-0.005  
11,82.134,rs7945646,-0.006  
11,82.138,rs664499,-0.006  
11,82.143,rs582132,-0.006  
11,82.264,rs631948,-0.005  
11,82.302,rs4945061,-0.005  
11,82.381,rs745870,-0.001  
11,82.388,rs12295401,-0.001  
11,82.530,rs7938584,-0.000  
11,82.731,rs2508746,0.002  
11,82.797,rs10751256,0.002  
11,82.823,rs11824655,0.002  
11,82.860,rs1892952,0.002  
11,82.866,rs4945097,0.001  
11,82.882,rs10899249,0.004  
11,82.926,rs7127747,0.004  
11,82.937,rs4619182,0.003  
11,82.948,rs11601880,-0.000  
11,82.955,rs1941600,-0.003  
11,82.962,rs7118888,-0.003  
11,82.985,rs873108,-0.003  
11,83.066,rs10899285,-0.003  
11,83.067,rs1149622,-0.003  
11,83.120,rs1225138,-0.007  
11,83.275,rs12797610,-0.021  
11,83.356,rs12421551,-0.030  
11,83.379,rs1043418,-0.033  
11,83.380,rs7943716,-0.033  
11,83.424,rs7930391,-0.048  
11,83.462,rs12793189,-0.047  
11,83.617,rs3019238,-0.047  
11,83.759,rs10899420,-0.039  
11,83.763,rs921383,-0.044  
11,83.766,rs3824865,-0.045  
11,83.795,rs230665,-0.042  
11,83.795,rs230662,-0.042  
11,83.795,rs230661,-0.042  
11,83.799,rs2450132,-0.053  
11,83.840,rs4945276,-0.038  
11,83.844,rs683420,-0.038  
11,84.106,rs597327,-0.041  
11,84.494,rs1792137,-0.027  
11,84.898,rs1941378,-0.013  
11,85.210,rs531767,-0.001  
11,85.240,rs750878,-0.001  
11,85.290,rs892857,-0.000  
11,85.316,rs587767,-0.000  
11,85.376,rs1821616,0.000  
11,85.386,rs11826637,0.000  
11,85.398,rs2016337,0.000  
11,85.415,rs4255563,0.000  
11,85.446,rs10793359,0.003  
11,85.490,rs7114639,0.010  
11,85.543,rs7118942,0.016  
11,85.543,rs7119070,0.016  
11,85.570,rs501435,0.020  
11,85.581,rs4359232,0.022  
11,85.641,rs1938821,0.028  
11,85.646,rs10501435,0.029  
11,85.673,rs522783,0.032  
11,85.681,rs616214,0.031

11,85.691,rs1011311,0.027  
11,85.702,rs486694,0.022  
11,85.850,rs11604024,0.020  
11,85.858,rs517684,0.020  
11,85.959,rs519985,0.040  
11,86.076,rs1912702,0.039  
11,86.125,rs7112396,0.048  
11,86.144,rs3935311,0.062  
11,86.165,rs7944323,0.063  
11,86.307,rs1944720,0.064  
11,86.336,rs17138648,0.068  
11,86.339,rs4944237,0.068  
11,86.414,rs528643,0.059  
11,86.526,rs2253740,0.047  
11,86.585,rs1944962,0.049  
11,86.623,rs2663203,0.051  
11,87.254,rs636471,0.004  
11,87.290,rs486935,0.003  
11,87.335,rs956168,0.000  
11,87.352,rs11238074,0.000  
11,87.358,rs17631231,0.000  
11,87.365,rs680999,0.001  
11,87.436,rs12793583,0.013  
11,87.443,rs2141418,0.013  
11,87.475,rs1261938,0.018  
11,87.518,rs1151207,0.024  
11,87.540,rs7926854,0.026  
11,87.551,rs990648,0.024  
11,87.582,rs2512483,0.016  
11,87.594,rs2448276,0.015  
11,87.596,rs2512509,0.014  
11,87.607,rs2512514,0.013  
11,87.621,rs1037399,0.015  
11,87.650,rs2198256,0.031  
11,87.685,rs965716,0.036  
11,87.737,rs4945424,0.035  
11,87.767,rs2373551,0.029  
11,87.800,rs7937935,0.023  
11,87.855,rs1917873,0.021  
11,87.888,rs1398450,0.020  
11,87.896,rs11232339,0.020  
11,87.925,rs17140931,0.019  
11,87.925,rs17140936,0.019  
11,87.931,rs11232369,0.019  
11,87.979,rs1909136,0.020  
11,87.986,rs1391529,0.020  
11,87.994,rs12803794,0.023  
11,88.049,rs11232428,0.047  
11,88.050,rs1566240,0.048  
11,88.053,rs1391530,0.047  
11,88.104,rs1403257,0.034  
11,88.127,rs17141455,0.030  
11,88.156,rs1568635,0.023  
11,88.164,rs2512098,0.021  
11,88.202,rs7102147,0.018  
11,88.270,rs2032408,0.010  
11,88.277,rs2446116,0.008  
11,88.289,rs12418411,0.009  
11,88.337,rs1458082,0.014  
11,88.380,rs3911554,0.004  
11,88.435,rs4944303,0.004

11,88.439,rs10792573,0.003  
11,88.469,rs7107748,0.002  
11,88.510,rs6592004,0.003  
11,88.538,rs1459951,0.004  
11,88.539,rs11607964,0.004  
11,88.550,rs7950689,0.001  
11,88.562,rs11232919,0.001  
11,88.731,rs666649,0.006  
11,88.757,rs644497,0.006  
11,88.758,rs11607467,0.006  
11,88.829,rs581701,0.001  
11,88.924,rs679930,0.000  
11,89.100,rs1125757,-0.000  
11,89.198,rs10897991,-0.000  
11,89.200,rs1939593,-0.000  
11,89.203,rs7947279,-0.001  
11,89.204,rs1784206,-0.001  
11,89.206,rs7940296,-0.001  
11,89.206,rs7125061,-0.001  
11,89.220,rs11233398,-0.001  
11,89.227,rs7936604,-0.000  
11,89.227,rs2010435,-0.000  
11,89.231,rs665714,-0.000  
11,89.417,rs2163612,0.001  
11,89.474,rs7928931,0.002  
11,89.544,rs17145887,0.003  
11,89.561,rs654217,0.003  
11,89.596,rs7111226,0.003  
11,89.642,rs7479949,0.002  
11,89.676,rs1878266,0.003  
11,89.685,rs1914204,0.000  
11,89.687,rs2037197,0.000  
11,89.692,rs17486172,0.000  
11,89.693,rs3793953,0.000  
11,89.732,rs790379,0.000  
11,89.736,rs2374465,0.000  
11,89.785,rs11233872,-0.001  
11,89.804,rs4944457,-0.001  
11,89.863,rs11233907,-0.001  
11,89.982,rs2054024,-0.000  
11,89.991,rs4944478,-0.000  
11,90.015,rs3896313,-0.001  
11,90.066,rs7127845,-0.002  
11,90.130,rs1430953,-0.002  
11,90.156,rs1940100,-0.002  
11,90.157,rs1940080,-0.003  
11,90.178,rs1943701,-0.005  
11,90.182,rs11234189,-0.003  
11,90.184,rs17206578,-0.003  
11,90.189,rs10501574,-0.002  
11,90.195,rs10501579,-0.003  
11,90.200,rs7127610,-0.005  
11,90.201,rs2155413,-0.005  
11,90.221,rs634050,-0.004  
11,90.317,rs12099145,-0.017  
11,90.345,rs10898409,-0.023  
11,90.350,rs11234429,-0.024  
11,90.370,rs6592289,-0.024  
11,90.392,rs292103,-0.022  
11,90.483,rs3741007,-0.037  
11,90.567,rs10898483,-0.038

11,90.850,rs10898501,-0.031  
11,90.916,rs4382935,-0.034  
11,91.143,rs7940187,-0.049  
11,91.199,rs642245,-0.048  
11,91.230,rs1938930,-0.044  
11,91.236,rs7129626,-0.042  
11,91.285,rs2433435,-0.031  
11,91.444,rs12285365,-0.039  
11,91.462,rs947884,-0.035  
11,91.487,rs10501631,-0.016  
11,91.506,rs7104996,-0.012  
11,91.513,rs2212766,-0.013  
11,91.536,rs4943964,-0.020  
11,91.621,rs11234901,-0.014  
11,91.757,rs11234962,-0.004  
11,91.801,rs655050,-0.006  
11,91.926,rs644471,-0.003  
11,92.037,rs12282551,-0.002  
11,92.066,rs2003177,-0.003  
11,92.180,rs7935389,-0.009  
11,92.218,rs10898722,-0.010  
11,92.243,rs7931829,-0.004  
11,92.323,rs2212407,-0.008  
11,92.325,rs11825065,-0.008  
11,92.336,rs4944792,-0.009  
11,92.337,rs10501656,-0.002  
11,92.337,rs7926453,-0.000  
11,92.342,rs609569,-0.003  
11,92.342,rs655649,-0.003  
11,92.345,rs490589,-0.007  
11,92.348,rs302653,-0.006  
11,92.349,rs11018795,-0.005  
11,92.352,rs633716,-0.001  
11,92.354,rs11019225,-0.001  
11,92.355,rs538047,-0.000  
11,92.362,rs308857,0.001  
11,92.362,rs308870,0.002  
11,92.364,rs2513423,0.002  
11,92.366,rs178244,0.002  
11,92.427,rs6483413,-0.005  
11,92.443,rs7119749,-0.007  
11,92.561,rs10830204,-0.007  
11,92.659,rs1939255,-0.005  
11,92.707,rs317150,-0.009  
11,92.721,rs1875565,-0.011  
11,92.776,rs2917538,-0.010  
11,93.052,rs647248,0.000  
11,93.057,rs3740818,0.000  
11,93.325,rs484213,0.005  
11,93.377,rs12363417,0.001  
11,93.381,rs10128721,0.001  
11,93.469,rs482463,0.001  
11,93.536,rs7926034,0.000  
11,93.554,rs2511317,0.000  
11,93.573,rs12225964,0.000  
11,93.708,rs11828730,-0.001  
11,93.732,rs4483549,-0.002  
11,93.737,rs4073197,-0.002  
11,93.792,rs11019417,-0.001  
11,93.809,rs12272958,-0.001  
11,93.809,rs11820998,-0.001



11,93.820,rs587473,-0.001  
11,93.872,rs2514316,-0.001  
11,93.943,rs12420217,-0.003  
11,93.953,rs10830766,-0.003  
11,93.987,rs1881289,-0.003  
11,94.010,rs7115718,-0.004  
11,94.030,rs12294567,-0.003  
11,94.037,rs16916699,-0.002  
11,94.055,rs2201119,-0.001  
11,94.070,rs7940613,-0.000  
11,94.173,rs10830834,-0.001  
11,94.375,rs10830888,-0.001  
11,94.437,rs1993543,-0.001  
11,94.456,rs2513466,-0.002  
11,94.519,rs10501779,-0.002  
11,94.649,rs1941438,-0.001  
11,94.651,rs10501790,-0.001  
11,94.693,rs605714,-0.000  
11,94.747,rs568629,-0.000  
11,94.888,rs10501795,-0.000  
11,94.981,rs10741444,-0.000  
11,95.064,rs7118248,-0.001  
11,95.094,rs1387154,-0.000  
11,95.106,rs737383,-0.001  
11,95.106,rs4526739,-0.001  
11,95.132,rs2166706,-0.009  
11,95.146,rs4601728,-0.012  
11,95.225,rs621310,-0.038  
11,95.225,rs7931462,-0.038  
11,95.253,rs3018133,-0.047  
11,95.275,rs614332,-0.051  
11,95.298,rs11020171,-0.043  
11,95.320,rs2121468,-0.035  
11,95.338,rs10831027,-0.033  
11,95.357,rs2605579,-0.031  
11,95.367,rs2658785,-0.031  
11,95.373,rs2608280,-0.031  
11,95.408,rs1954783,-0.014  
11,95.446,rs1284108,-0.018  
11,95.460,rs585768,-0.020  
11,95.513,rs2462741,-0.030  
11,95.652,rs4073612,-0.025  
11,95.746,rs11826531,-0.026  
11,95.806,rs669634,-0.026  
11,95.854,rs481597,-0.007  
11,95.897,rs3740864,-0.006  
11,95.914,rs6483341,-0.005  
11,96.052,rs11020819,-0.002  
11,96.108,rs7119735,-0.002  
11,96.120,rs1940640,-0.002  
11,96.252,rs10501816,-0.002  
11,96.471,rs689825,-0.010  
11,96.573,rs10501819,-0.020  
11,96.668,rs11602904,-0.034  
11,96.735,rs655070,-0.034  
11,96.782,rs547243,-0.024  
11,96.835,rs586421,-0.022  
11,96.877,rs12574604,-0.023  
11,96.879,rs682533,-0.023  
11,96.880,rs11021055,-0.023  
11,96.910,rs684856,-0.037

11,96.928,rs646667,-0.037  
11,96.952,rs626481,-0.036  
11,97.040,rs1073059,-0.037  
11,97.051,rs11021100,-0.037  
11,97.053,rs9667295,-0.037  
11,97.104,rs976337,-0.033  
11,97.340,rs4121863,-0.015  
11,97.379,rs541821,-0.015  
11,97.414,rs3937019,-0.010  
11,97.436,rs11021168,-0.010  
11,97.510,rs4237572,-0.012  
11,97.519,rs4237573,-0.012  
11,97.521,rs16922018,-0.012  
11,97.543,rs12280779,-0.012  
11,97.580,rs4121809,-0.017  
11,97.627,rs7943143,-0.015  
11,97.654,rs4409785,-0.015  
11,97.683,rs2254634,-0.017  
11,97.741,rs7938474,-0.024  
11,97.775,rs7947022,-0.030  
11,97.787,rs1150347,-0.032  
11,97.838,rs7931238,-0.044  
11,97.859,rs1939875,-0.065  
11,97.862,rs1939888,-0.068  
11,97.894,rs7102303,-0.115  
11,97.906,rs11021295,-0.120  
11,97.981,rs1727164,-0.118  
11,97.981,rs1569057,-0.118  
11,98.190,rs2155436,-0.112  
11,98.339,rs10741525,-0.118  
11,98.416,rs7104987,-0.122  
11,98.448,rs16922803,-0.116  
11,98.491,rs4144614,-0.109  
11,98.549,rs687782,-0.101  
11,98.566,rs10831469,-0.098  
11,98.691,rs7104859,-0.085  
11,98.847,rs4531427,-0.081  
11,98.953,rs479825,-0.079  
11,99.001,rs483333,-0.080  
11,99.028,rs522495,-0.079  
11,99.044,rs566519,-0.068  
11,99.047,rs693182,-0.066  
11,99.074,rs11021494,-0.088  
11,99.115,rs892685,-0.127  
11,99.209,rs6483496,-0.125  
11,99.271,rs4753196,-0.123  
11,99.549,rs12286856,-0.113  
11,99.680,rs618929,-0.109  
11,100.263,rs4594032,-0.091  
11,100.542,rs3019724,-0.091  
11,100.713,rs1982437,-0.066  
11,100.751,rs11224253,-0.060  
11,100.758,rs2096735,-0.051  
11,100.764,rs7952525,-0.043  
11,100.767,rs7106102,-0.043  
11,100.775,rs4754723,-0.041  
11,100.814,rs1580678,-0.023  
11,100.830,rs17129910,-0.012  
11,100.831,rs984675,-0.011  
11,100.832,rs1690587,-0.011  
11,100.833,rs12224055,-0.010

11,100.881,rs1426640,-0.003  
11,100.908,rs1840054,-0.001  
11,100.935,rs1452670,-0.001  
11,100.957,rs1970747,-0.001  
11,100.965,rs7940229,-0.001  
11,101.003,rs649985,-0.000  
11,101.024,rs1039953,-0.000  
11,101.041,rs10890801,0.000  
11,101.049,rs2897122,0.000  
11,101.067,rs2897197,0.000  
11,101.176,rs2597630,0.002  
11,101.369,rs667679,0.007  
11,101.395,rs4121681,0.007  
11,101.455,rs2509867,0.008  
11,101.509,rs4581411,0.008  
11,101.755,rs7944403,0.012  
11,101.906,rs7122788,0.017  
11,102.006,rs10891845,0.026  
11,102.014,rs11215568,0.026  
11,102.035,rs1482224,0.026  
11,102.111,rs1482219,0.020  
11,102.145,rs11604245,0.015  
11,102.150,rs10891978,0.014  
11,102.174,rs1461688,0.000  
11,102.279,rs7939244,0.002  
11,102.314,rs282494,0.002  
11,102.349,rs7930825,0.003  
11,102.370,rs1504708,0.003  
11,102.376,rs11219732,0.003  
11,102.406,rs2656219,0.005  
11,102.412,rs9919649,0.005  
11,102.506,rs3133442,0.012  
11,102.576,rs2726379,0.013  
11,102.625,rs12789908,0.013  
11,102.709,rs631773,0.024  
11,102.728,rs17134252,0.028  
11,102.742,rs2010606,0.026  
11,102.753,rs7111400,0.025  
11,102.757,rs12807115,0.024  
11,102.779,rs1939374,0.028  
11,102.844,rs12280616,0.023  
11,102.905,rs7931411,0.020  
11,102.922,rs1596306,0.019  
11,102.934,rs11221872,0.018  
11,102.943,rs7952312,0.018  
11,102.998,rs10082676,0.016  
11,103.011,rs4753962,0.015  
11,103.015,rs7933349,0.015  
11,103.080,rs7933249,0.017  
11,103.118,rs7929129,0.020  
11,103.245,rs6590789,0.025  
11,103.279,rs1942109,0.028  
11,103.453,rs639494,0.041  
11,103.462,rs11224313,0.041  
11,103.482,rs601727,0.051  
11,103.499,rs11224328,0.048  
11,103.563,rs7350545,0.037  
11,103.579,rs7107791,0.026  
11,103.969,rs568157,0.001  
11,103.996,rs7936649,0.003  
11,103.997,rs1943760,0.005

11,103.998,rs1943761,0.005  
11,104.035,rs7948300,0.006  
11,104.046,rs4272759,0.006  
11,104.048,rs7106085,0.006  
11,104.077,rs1938859,0.007  
11,104.128,rs1939047,0.008  
11,104.220,rs1441928,0.009  
11,104.246,rs11225089,0.009  
11,104.308,rs17097403,0.009  
11,104.376,rs1942683,0.008  
11,104.387,rs17689778,0.008  
11,104.392,rs1894116,0.007  
11,104.436,rs10501996,0.003  
11,104.444,rs2846844,0.003  
11,104.476,rs1055088,0.001  
11,104.573,rs651853,-0.001  
11,104.580,rs11225285,-0.002  
11,104.585,rs643281,-0.002  
11,104.587,rs7945819,-0.002  
11,104.589,rs2156528,-0.002  
11,104.602,rs11603486,-0.003  
11,104.605,rs12418815,-0.003  
11,104.610,rs4754854,-0.003  
11,104.641,rs3781788,-0.005  
11,104.656,rs948138,-0.007  
11,104.712,rs1940475,-0.011  
11,104.720,rs10791591,-0.011  
11,104.732,rs17099492,-0.016  
11,104.754,rs470747,-0.025  
11,104.759,rs498186,-0.036  
11,104.778,rs1010698,-0.047  
11,104.800,rs651159,-0.047  
11,104.845,rs11826440,-0.046  
11,104.859,rs687558,-0.048  
11,104.861,rs10791605,-0.048  
11,104.893,rs608645,-0.049  
11,104.974,rs11225571,-0.052  
11,105.146,rs519773,-0.057  
11,105.216,rs11828980,-0.074  
11,105.225,rs10895461,-0.075  
11,105.227,rs1946017,-0.074  
11,105.246,rs10895475,-0.062  
11,105.247,rs17101182,-0.062  
11,105.253,rs7944909,-0.064  
11,105.263,rs10488759,-0.065  
11,105.270,rs2198123,-0.078  
11,105.371,rs1531837,-0.071  
11,105.389,rs7104359,-0.070  
11,105.413,rs11226048,-0.069  
11,105.424,rs512138,-0.068  
11,105.431,rs720171,-0.067  
11,105.434,rs532445,-0.067  
11,105.480,rs260836,-0.061  
11,105.513,rs260808,-0.053  
11,105.515,rs1818106,-0.053  
11,105.519,rs260818,-0.060  
11,105.522,rs361315,-0.064  
11,105.542,rs361281,-0.065  
11,105.552,rs361291,-0.063  
11,105.571,rs361268,-0.058  
11,105.770,rs658468,-0.111

11,105.899,rs1147018,-0.119  
11,106.114,rs7125155,-0.095  
11,106.118,rs633782,-0.096  
11,106.126,rs7949293,-0.096  
11,106.145,rs480550,-0.098  
11,106.203,rs1613367,-0.105  
11,106.246,rs1785864,-0.112  
11,106.370,rs17103984,-0.115  
11,106.374,rs11600433,-0.116  
11,106.579,rs1009820,-0.126  
11,106.634,rs1445617,-0.128  
11,106.718,rs672673,-0.124  
11,106.736,rs1939153,-0.124  
11,106.818,rs17093811,-0.133  
11,106.820,rs2155345,-0.133  
11,106.843,rs11226922,-0.138  
11,106.978,rs4755149,-0.168  
11,107.003,rs1512436,-0.162  
11,107.015,rs7943420,-0.132  
11,107.017,rs2511418,-0.131  
11,107.019,rs10502070,-0.130  
11,107.052,rs1791468,-0.131  
11,107.055,rs1945062,-0.131  
11,107.077,rs4754161,-0.132  
11,107.101,rs2187509,-0.094  
11,107.110,rs1791587,-0.068  
11,107.116,rs7104111,-0.067  
11,107.128,rs11211867,-0.065  
11,107.133,rs597384,-0.067  
11,107.350,rs17564612,-0.176  
11,107.371,rs7926602,-0.197  
11,107.416,rs11602728,-0.211  
11,107.482,rs614594,-0.215  
11,107.587,rs654093,-0.212  
11,107.647,rs1939900,-0.234  
11,107.653,rs7123473,-0.232  
11,107.662,rs1939894,-0.228  
11,107.698,rs10890750,-0.231  
11,107.700,rs7950899,-0.229  
11,107.733,rs7105672,-0.234  
11,107.747,rs7116354,-0.235  
11,107.794,rs502398,-0.239  
11,107.835,rs2847190,-0.246  
11,107.861,rs7930340,-0.237  
11,107.891,rs4028250,-0.227  
11,107.901,rs12574834,-0.221  
11,108.057,rs4987876,-0.200  
11,108.100,rs609261,-0.193  
11,108.217,rs10890845,-0.176  
11,108.250,rs2846412,-0.176  
11,108.315,rs4539291,-0.176  
11,108.350,rs2306118,-0.181  
11,108.541,rs11212826,-0.275  
11,108.573,rs10890920,-0.277  
11,108.583,rs1974953,-0.251  
11,108.612,rs1949050,-0.244  
11,108.630,rs10789713,-0.233  
11,108.660,rs1509731,-0.216  
11,108.707,rs10890960,-0.191  
11,108.835,rs618316,-0.182  
11,109.016,rs1837396,-0.158

11,109.291,rs1368688,-0.122  
11,109.425,rs7126496,-0.137  
11,109.465,rs7947141,-0.141  
11,109.467,rs1789395,-0.116  
11,109.488,rs1789374,-0.091  
11,109.506,rs1648131,-0.089  
11,109.514,rs7951918,-0.088  
11,109.549,rs660222,-0.087  
11,109.642,rs1676522,-0.096  
11,109.660,rs12420766,-0.095  
11,109.797,rs2136361,-0.085  
11,109.863,rs95596,-0.078  
11,109.987,rs2432703,-0.105  
11,110.019,rs929908,-0.144  
11,110.046,rs6589200,-0.144  
11,110.055,rs11213674,-0.145  
11,110.062,rs4643108,-0.122  
11,110.082,rs978769,-0.115  
11,110.113,rs321418,-0.121  
11,110.133,rs12291189,-0.119  
11,110.153,rs2000907,-0.136  
11,110.166,rs10502138,-0.138  
11,110.170,rs6589213,-0.137  
11,110.178,rs10891238,-0.137  
11,110.200,rs11213819,-0.139  
11,110.210,rs1046872,-0.152  
11,110.225,rs7117229,-0.154  
11,110.249,rs7952176,-0.153  
11,110.265,rs7930326,-0.150  
11,110.348,rs11213917,-0.137  
11,110.622,rs4938792,-0.149  
11,111.779,rs627441,-0.159  
11,112.002,rs360726,-0.141  
11,112.128,rs1946518,-0.139  
11,112.207,rs7105056,-0.141  
11,112.264,rs2250417,-0.143  
11,112.431,rs7103894,-0.155  
11,112.533,rs4937257,-0.163  
11,112.583,rs940756,-0.183  
11,112.622,rs7933113,-0.200  
11,112.624,rs4937422,-0.201  
11,112.630,rs7946315,-0.204  
11,112.665,rs4272816,-0.212  
11,112.694,rs1459658,-0.241  
11,112.698,rs473990,-0.243  
11,112.700,rs321125,-0.243  
11,112.707,rs4937686,-0.270  
11,112.749,rs7938281,-0.254  
11,112.765,rs2175519,-0.248  
11,112.817,rs4937786,-0.276  
11,113.054,rs4937993,-0.294  
11,113.087,rs7939805,-0.289  
11,113.144,rs17115184,-0.281  
11,113.171,rs584427,-0.278  
11,113.174,rs12279261,-0.273  
11,113.185,rs7130671,-0.293  
11,113.188,rs12794326,-0.289  
11,113.195,rs10891524,-0.261  
11,113.205,rs2288158,-0.265  
11,113.207,rs2298703,-0.266  
11,113.226,rs4559717,-0.309

11,113.229,rs660361,-0.315  
11,113.276,rs723077,-0.357  
11,113.370,rs12422191,-0.363  
11,113.410,rs2734838,-0.365  
11,113.548,rs7131056,-0.348  
11,113.620,rs10891556,-0.348  
11,113.627,rs11214654,-0.347  
11,113.810,rs7123697,-0.322  
11,113.880,rs4132966,-0.311  
11,113.881,rs7940164,-0.311  
11,114.192,rs2886189,-0.255  
11,114.578,rs11604602,-0.227  
11,114.900,rs10789980,-0.215  
11,114.905,rs1150226,-0.217  
11,114.925,rs897685,-0.226  
11,114.953,rs7118530,-0.238  
11,114.955,rs1563533,-0.237  
11,114.998,rs2509220,-0.212  
11,115.016,rs7113940,-0.219  
11,115.021,rs1791807,-0.211  
11,115.064,rs238896,-0.158  
11,115.069,rs7116229,-0.159  
11,115.084,rs10488695,-0.157  
11,115.089,rs595641,-0.137  
11,115.118,rs585287,-0.119  
11,115.156,rs656269,-0.115  
11,115.164,rs672455,-0.112  
11,115.171,rs378331,-0.107  
11,115.179,rs370634,-0.111  
11,115.200,rs530532,-0.110  
11,115.201,rs12793024,-0.109  
11,115.204,rs12573952,-0.108  
11,115.209,rs2511153,-0.111  
11,115.236,rs4938087,-0.134  
11,115.238,rs2604294,-0.136  
11,115.346,rs6589426,-0.197  
11,115.379,rs591013,-0.188  
11,115.401,rs688101,-0.183  
11,115.485,rs566531,-0.180  
11,115.967,rs1712790,-0.148  
11,116.041,rs10891749,-0.127  
11,116.082,rs12287008,-0.124  
11,116.303,rs1403944,-0.087  
11,116.346,rs1403947,-0.105  
11,116.487,rs11215671,-0.147  
11,116.515,rs10891888,-0.152  
11,116.621,rs6589499,-0.168  
11,116.644,rs11215687,-0.150  
11,116.817,rs2186703,-0.171  
11,116.906,rs367164,-0.181  
11,117.045,rs11215750,-0.178  
11,117.125,rs11215766,-0.182  
11,117.216,rs1648364,-0.168  
11,117.288,rs491198,-0.145  
11,117.331,rs1783229,-0.131  
11,117.390,rs1783219,-0.142  
11,117.415,rs1783238,-0.148  
11,117.487,rs4471467,-0.183  
11,117.512,rs7122088,-0.191  
11,117.547,rs4936337,-0.202  
11,117.601,rs2367635,-0.210

11,117.644,rs7103346,-0.207  
11,117.821,rs10502215,-0.272  
11,117.828,rs526151,-0.273  
11,117.846,rs487962,-0.256  
11,117.903,rs4938268,-0.202  
11,117.915,rs553344,-0.198  
11,117.932,rs576670,-0.183  
11,117.973,rs2174880,-0.196  
11,117.986,rs532107,-0.217  
11,117.991,rs11215936,-0.216  
11,118.022,rs12418858,-0.240  
11,118.027,rs513083,-0.240  
11,118.081,rs573554,-0.254  
11,118.109,rs925151,-0.248  
11,118.132,rs1508102,-0.245  
11,118.141,rs1039755,-0.244  
11,118.169,rs4936353,-0.206  
11,118.258,rs7943240,-0.182  
11,118.286,rs10790151,-0.181  
11,118.314,rs11216029,-0.142  
11,118.369,rs507262,-0.133  
11,118.401,rs947987,-0.135  
11,118.430,rs506305,-0.138  
11,118.670,rs918144,-0.130  
11,118.671,rs10488698,-0.130  
11,119.708,rs500389,-0.074  
11,119.848,rs12282721,-0.072  
11,119.927,rs676134,-0.073  
11,120.213,rs4938377,-0.048  
11,120.222,rs3889570,-0.050  
11,120.258,rs4938379,-0.067  
11,120.270,rs2511050,-0.074  
11,120.276,rs587443,-0.077  
11,120.287,rs597686,-0.073  
11,120.300,rs4936383,-0.068  
11,120.355,rs557940,-0.074  
11,120.396,rs11216466,-0.077  
11,120.404,rs11824398,-0.077  
11,120.425,rs11216474,-0.076  
11,120.429,rs7949956,-0.076  
11,120.440,rs10892147,-0.077  
11,120.464,rs7942751,-0.080  
11,120.472,rs1942924,-0.077  
11,120.492,rs11216509,-0.072  
11,120.505,rs11216517,-0.071  
11,120.527,rs4576856,-0.069  
11,120.544,rs10790208,-0.067  
11,120.545,rs7945999,-0.066  
11,120.565,rs3819132,-0.045  
11,120.583,rs635706,-0.050  
11,120.587,rs11216567,-0.048  
11,120.588,rs4472969,-0.048  
11,120.594,rs3087563,-0.031  
11,120.598,rs473057,-0.022  
11,120.600,rs6589624,-0.015  
11,120.610,rs2853009,0.005  
11,120.654,rs2277289,0.023  
11,120.704,rs1561966,0.037  
11,121.011,rs10736492,0.040  
11,121.157,rs573905,0.033  
11,121.394,rs523604,0.022



11,121.443,rs11217091,0.019  
11,121.511,rs4938603,0.022  
11,121.582,rs11217128,0.022  
11,121.616,rs1003081,0.027  
11,121.663,rs582688,0.031  
11,121.820,rs1815811,0.048  
11,121.974,rs2511834,0.049  
11,121.986,rs6649,0.048  
11,121.994,rs10790289,0.046  
11,122.016,rs2195525,0.045  
11,122.174,rs891292,0.061  
11,122.275,rs2887245,0.040  
11,122.286,rs11217340,0.041  
11,122.361,rs11217364,0.050  
11,122.380,rs4409838,0.047  
11,122.382,rs4438048,0.047  
11,122.398,rs12797352,0.046  
11,122.641,rs7131676,0.022  
11,122.743,rs10892470,0.014  
11,122.788,rs1007369,0.012  
11,122.851,rs1665778,0.024  
11,122.871,rs509733,0.025  
11,122.954,rs509809,0.016  
11,123.042,rs10892502,0.014  
11,123.070,rs4245210,0.012  
11,123.202,rs655929,0.008  
11,123.290,rs4936507,0.008  
11,123.348,rs617320,0.008  
11,123.409,rs606970,0.008  
11,123.438,rs666432,0.009  
11,123.543,rs579368,0.015  
11,123.766,rs10892559,0.043  
11,123.813,rs11605781,0.048  
11,123.874,rs4938800,0.043  
11,123.939,rs632137,0.040  
11,124.112,rs2276035,0.033  
11,124.169,rs2247168,0.034  
11,124.205,rs2252359,0.034  
11,124.374,rs7924948,0.010  
11,124.376,rs7928903,0.014  
11,124.377,rs1574249,0.016  
11,124.379,rs12295761,0.016  
11,124.425,rs7928347,0.011  
11,124.444,rs7932158,0.015  
11,124.471,rs12278795,0.019  
11,124.534,rs1945010,0.035  
11,124.548,rs3133864,0.033  
11,124.570,rs948028,0.034  
11,124.586,rs879602,0.041  
11,124.596,rs1954787,0.038  
11,124.645,rs6589846,0.039  
11,124.740,rs7111184,0.023  
11,124.765,rs949295,0.030  
11,124.808,rs3781817,0.041  
11,124.829,rs2276319,0.042  
11,124.865,rs10892657,0.038  
11,124.931,rs7952619,0.043  
11,125.016,rs684384,0.039  
11,125.052,rs2155466,0.042  
11,125.164,rs10892689,0.050  
11,125.318,rs11218261,0.024

11,125.347,rs891437,0.033  
11,125.459,rs668053,0.032  
11,125.502,rs7945931,0.019  
11,125.579,rs666004,0.018  
11,125.598,rs11601559,0.016  
11,125.637,rs1790213,0.019  
11,125.680,rs12287339,0.022  
11,125.688,rs7101373,0.022  
11,125.742,rs11606903,0.027  
11,125.761,rs647905,0.028  
11,125.895,rs7937934,0.033  
11,126.065,rs2370643,0.027  
11,126.075,rs1219385,0.022  
11,126.080,rs1219423,0.023  
11,126.192,rs1231186,0.039  
11,126.200,rs1789742,0.040  
11,126.206,rs1791977,0.041  
11,126.220,rs7101566,0.040  
11,126.482,rs549798,0.030  
11,126.504,rs10502254,0.030  
11,126.630,rs687928,0.007  
11,126.788,rs6589913,0.003  
11,126.957,rs531743,0.001  
11,126.996,rs577924,0.001  
11,127.129,rs660546,0.002  
11,127.168,rs7115833,0.003  
11,127.222,rs12293128,0.002  
11,127.325,rs10892831,0.001  
11,127.458,rs12804305,0.002  
11,127.484,rs1216554,0.003  
11,127.656,rs7937803,0.007  
11,127.864,rs4565904,0.016  
11,127.890,rs7111139,0.017  
11,127.911,rs7944144,0.019  
11,128.167,rs12797830,0.041  
11,128.214,rs7932902,0.038  
11,128.271,rs871843,0.045  
11,128.289,rs12276870,0.041  
11,128.350,rs10790529,0.022  
11,128.366,rs6589948,0.022  
11,128.413,rs872414,0.019  
11,128.526,rs11218856,0.023  
11,128.595,rs1916040,0.025  
11,128.612,rs3107606,0.025  
11,128.646,rs4936757,0.024  
11,128.732,rs3134402,0.021  
11,129.243,rs3816621,0.021  
11,129.667,rs922252,0.018  
11,130.070,rs7126295,0.023  
11,130.141,rs11219032,0.039  
11,130.150,rs9943547,0.043  
11,130.158,rs12281746,0.042  
11,130.165,rs10892974,0.033  
11,130.208,rs7929006,0.048  
11,130.222,rs7130937,0.051  
11,130.288,rs577432,0.072  
11,130.328,rs12272976,0.070  
11,130.430,rs7934887,0.036  
11,130.449,rs12273127,0.036  
11,130.502,rs10502268,0.031  
11,130.622,rs7126113,0.016

11,130.738,rs17686304,0.020  
11,130.769,rs17128086,0.022  
11,130.809,rs10502277,0.024  
11,130.882,rs12800859,0.037  
11,130.947,rs489527,0.029  
11,130.995,rs12802638,0.020  
11,131.000,rs17128423,0.020  
11,131.298,rs2512167,0.007  
11,131.392,rs539802,0.002  
11,131.467,rs10431091,0.001  
11,131.528,rs7110338,0.001  
11,131.537,rs10790707,0.004  
11,131.546,rs10128573,0.006  
11,131.554,rs10893277,0.005  
11,131.567,rs686567,0.004  
11,131.569,rs2846572,0.004  
11,131.573,rs2187152,0.004  
11,131.647,rs646487,0.001  
11,131.727,rs646521,0.001  
11,131.740,rs1783885,0.001  
11,131.749,rs997989,0.001  
11,131.754,rs610104,0.002  
11,131.763,rs11219805,-0.002  
11,131.764,rs11219808,-0.002  
11,131.765,rs11604758,-0.002  
11,131.783,rs11219821,-0.004  
11,131.800,rs11219830,-0.002  
11,131.803,rs12421354,-0.002  
11,131.855,rs3809054,-0.002  
11,131.964,rs4477450,-0.001  
11,131.970,rs3802807,-0.000  
11,131.988,rs7128296,0.001  
11,132.012,rs666051,0.002  
11,132.025,rs734434,0.001  
11,132.032,rs7108303,0.001  
11,132.075,rs601414,0.003  
11,132.116,rs12577901,0.008  
11,132.159,rs750338,0.008  
11,132.184,rs4935918,0.008  
11,132.187,rs12360927,0.008  
11,132.217,rs4937003,0.007  
11,132.220,rs2059615,0.006  
11,132.235,rs731716,0.006  
11,132.237,rs7941528,0.006  
11,132.250,rs959582,0.006  
11,132.263,rs599206,0.011  
11,132.597,rs2845853,0.011  
11,133.148,rs635819,0.007  
11,133.280,rs2509616,0.007  
11,133.477,rs528638,0.009  
11,133.535,rs3740912,0.010  
11,133.695,rs2043438,0.013  
11,133.797,rs4935955,0.014  
11,133.953,rs2278451,0.007  
11,134.212,rs632918,-0.000  
11,134.214,rs562731,-0.000  
11,134.250,rs515917,-0.000  
11,134.644,rs3802813,-0.000  
11,134.748,rs624259,-0.001  
11,135.090,rs11220473,-0.007  
11,135.117,rs2298475,-0.008

11,135.193,rs4935969,-0.013  
11,135.248,rs3740918,-0.016  
11,135.268,rs3802819,-0.016  
11,135.338,rs7946496,-0.016  
11,135.469,rs1892999,-0.014  
11,135.491,rs12803511,-0.017  
11,135.567,rs12270348,-0.032  
11,135.602,rs674537,-0.040  
11,135.673,rs12291500,-0.050  
11,135.720,rs10893539,-0.055  
11,135.771,rs619996,-0.076  
11,135.818,rs632023,-0.044  
11,135.861,rs541969,-0.042  
11,135.931,rs493725,-0.056  
11,135.940,rs693253,-0.058  
11,135.942,rs11220578,-0.059  
11,135.961,rs1946075,-0.074  
11,135.969,rs1946053,-0.074  
11,135.972,rs10750352,-0.074  
11,135.982,rs7924535,-0.066  
11,135.987,rs6590235,-0.067  
11,135.993,rs1939992,-0.067  
11,135.998,rs10893608,-0.067  
11,135.999,rs2040339,-0.066  
11,136.001,rs631562,-0.066  
11,136.006,rs11220708,-0.063  
11,136.009,rs483644,-0.067  
11,136.018,rs619208,-0.077  
11,136.028,rs6590245,-0.056  
11,136.031,rs12291238,-0.033  
11,136.038,rs2513444,-0.017  
11,136.044,rs4529888,-0.007  
11,136.049,rs7924365,-0.006  
11,136.058,rs10893663,-0.004  
11,136.060,rs2618202,-0.004  
11,136.079,rs7108023,-0.008  
11,136.086,rs11220916,-0.010  
11,136.091,rs7924331,-0.010  
11,136.111,rs7102636,-0.012  
11,136.116,rs7946281,-0.013  
11,136.124,rs356272,-0.017  
11,136.589,rs1940745,-0.075  
11,136.791,rs1785039,-0.075  
11,137.293,rs11221163,-0.085  
11,137.387,rs1477577,-0.082  
11,137.412,rs1940359,-0.083  
11,137.990,rs7110677,-0.093  
11,137.991,rs7127307,-0.093  
11,138.042,rs6590322,-0.096  
11,138.060,rs871506,-0.096  
11,138.157,rs4556551,-0.117  
11,138.204,rs7939722,-0.114  
11,138.245,rs1540225,-0.115  
11,138.379,rs4937333,-0.123  
11,138.434,rs7122859,-0.120  
11,138.450,rs4628683,-0.118  
11,138.537,rs7116578,-0.111  
11,138.563,rs4937342,-0.111  
11,138.624,rs4245079,-0.110  
11,138.750,rs4937357,-0.125  
11,138.771,rs11221388,-0.128

11,138.819,rs4937362,-0.138  
11,138.843,rs7935286,-0.140  
11,138.902,rs7939387,-0.148  
11,138.919,rs10790969,-0.149  
11,139.007,rs695113,-0.133  
11,139.163,rs626816,-0.193  
11,139.188,rs4558174,-0.216  
11,139.216,rs687572,-0.243  
11,139.230,rs603021,-0.262  
11,139.307,rs687326,-0.275  
11,139.342,rs554341,-0.277  
11,139.371,rs9667584,-0.279  
11,139.447,rs7925428,-0.297  
11,139.508,rs7943324,-0.313  
11,139.517,rs1574128,-0.315  
11,139.539,rs6590356,-0.311  
11,139.645,rs1893142,-0.322  
11,139.667,rs11601431,-0.326  
11,139.703,rs4609618,-0.328  
11,139.758,rs3740829,-0.329  
11,140.504,rs4245084,-0.340  
11,140.583,rs4616048,-0.342  
11,140.713,rs10894022,-0.339  
11,140.876,rs1540666,-0.339  
11,140.909,rs10791006,-0.325  
11,140.946,rs11221703,-0.307  
11,140.947,rs3019797,-0.307  
11,140.985,rs2860290,-0.305  
11,141.008,rs11828252,-0.303  
11,141.062,rs3019117,-0.309  
11,141.254,rs1389235,-0.341  
11,141.276,rs2008849,-0.356  
11,141.321,rs923811,-0.389  
11,141.399,rs1552820,-0.383  
11,141.405,rs11823376,-0.384  
11,141.494,rs1873873,-0.399  
11,141.550,rs6590400,-0.428  
11,141.728,rs1814343,-0.435  
11,141.737,rs10894117,-0.434  
11,141.815,rs692611,-0.431  
11,141.858,rs525320,-0.417  
11,141.871,rs934130,-0.419  
11,141.978,rs10894138,-0.412  
11,142.158,rs7114881,-0.357  
11,142.306,rs1623543,-0.366  
11,142.499,rs7111882,-0.387  
11,142.724,rs982125,-0.422  
11,142.975,rs11221986,-0.433  
11,143.096,rs10791062,-0.438  
11,143.163,rs4936094,-0.447  
11,143.341,rs858718,-0.463  
11,143.500,rs7938225,-0.476  
11,143.517,rs7937282,-0.478  
11,143.560,rs6590453,-0.486  
11,143.654,rs2242312,-0.479  
11,143.685,rs2291347,-0.494  
11,143.745,rs10894199,-0.504  
11,143.763,rs11222101,-0.513  
11,143.849,rs4937523,-0.554  
11,143.872,rs1493300,-0.561  
11,144.059,rs11222164,-0.609

11,144.064,rs2640215,-0.612  
11,144.118,rs12418439,-0.605  
11,144.252,rs2091735,-0.585  
11,144.269,rs7118354,-0.581  
11,144.281,rs7105145,-0.579  
11,144.380,rs7933829,-0.550  
11,144.458,rs4466848,-0.534  
11,144.632,rs10894241,-0.478  
11,144.680,rs6590509,-0.473  
11,144.785,rs1939904,-0.500  
11,144.793,rs10894262,-0.457  
11,144.803,rs10894263,-0.447  
11,144.830,rs7943936,-0.421  
11,144.918,rs12364918,-0.466  
11,144.966,rs585512,-0.507  
11,145.013,rs4414223,-0.513  
11,145.031,rs11822781,-0.518  
11,145.324,rs1118137,-0.608  
11,145.373,rs1347281,-0.597  
11,145.543,rs2276437,-0.690  
11,145.627,rs10750464,-0.794  
11,145.639,rs11222488,-0.810  
11,145.670,rs11222492,-0.765  
11,145.678,rs10894332,-0.787  
11,145.698,rs10750465,-0.840  
11,145.702,rs1613845,-0.837  
11,145.821,rs4254083,-0.740  
11,145.829,rs1793562,-0.720  
11,145.920,rs1793544,-0.693  
11,145.949,rs7937772,-0.690  
11,146.076,rs7939158,-0.672  
11,146.174,rs2513536,-0.664  
11,146.205,rs11606643,-0.638  
11,146.234,rs4128590,-0.618  
11,146.301,rs7943929,-0.666  
11,146.373,rs895797,-0.701  
11,146.423,rs10894387,-0.720  
11,146.502,rs12790085,-0.788  
11,146.566,rs1550976,-0.918  
11,146.590,rs11222633,-0.941  
11,146.680,rs10791148,-1.029  
11,146.702,rs874548,-1.035  
11,146.793,rs385987,-1.041  
11,146.899,rs318984,-1.074  
11,146.905,rs11828333,-1.077  
11,147.063,rs1040101,-1.123  
11,147.246,rs4547102,-1.108  
11,147.314,rs2246649,-1.103  
11,147.824,rs11821922,-1.072  
11,147.859,rs1527776,-1.112  
11,147.872,rs1554802,-1.127  
11,148.026,rs1036433,-1.161  
11,148.046,rs659910,-1.138  
11,148.050,rs541507,-1.136  
11,148.110,rs496368,-1.066  
11,148.114,rs10791184,-1.065  
11,148.115,rs511311,-1.066  
11,148.121,rs552542,-1.070  
11,148.173,rs10791187,-1.089  
11,148.198,rs916579,-1.119  
11,148.314,rs1547893,-1.352

11,148.334,rs10894495,-1.364  
11,148.427,rs4128547,-1.280  
11,148.569,rs11222981,-1.188  
11,148.582,rs3099789,-1.181  
11,148.754,rs2044728,-1.162  
11,148.810,rs12293070,-1.149  
11,148.862,rs3099773,-1.147  
11,148.894,rs895924,-1.142  
11,149.527,rs877264,-1.033  
11,149.555,rs621452,-1.039  
11,149.585,rs2508983,-1.047  
11,149.708,rs490435,-1.065  
11,149.709,rs494050,-1.065  
11,149.773,rs7125475,-1.061  
11,150.135,rs10894589,-1.046  
11,150.141,rs11223157,-1.045  
11,150.474,rs1620329,-0.965  
11,150.505,rs532769,-1.013  
11,150.853,rs11223213,-0.805  
11,150.981,rs4937729,-0.763  
11,151.035,rs1506876,-0.740  
11,151.042,rs2659615,-0.707  
11,151.066,rs1395504,-0.594  
11,151.114,rs10791261,-0.568  
11,151.155,rs12222239,-0.579  
11,151.210,rs979054,-0.650  
11,151.218,rs2725442,-0.652  
11,151.230,rs7342163,-0.655  
11,151.245,rs7123307,-0.658  
11,151.264,rs871437,-0.671  
11,151.318,rs4542422,-0.698  
11,151.333,rs1567127,-0.659  
11,151.338,rs11223299,-0.661  
11,151.370,rs12287409,-0.663  
11,151.386,rs7101624,-0.665  
11,151.445,rs7935421,-0.605  
11,151.499,rs11223331,-0.591  
11,151.548,rs11223336,-0.590  
11,151.584,rs12365003,-0.582  
11,151.611,rs11223350,-0.605  
11,151.650,rs1007018,-0.588  
11,151.684,rs7122481,-0.634  
11,151.738,rs985631,-0.619  
11,151.765,rs7123002,-0.556  
11,151.795,rs101259,-0.523  
11,151.882,rs728341,-0.403  
11,151.911,rs1563155,-0.410  
11,151.937,rs11223384,-0.397  
11,151.950,rs7121368,-0.401  
11,152.005,rs10894662,-0.487  
11,152.013,rs750270,-0.480  
11,152.031,rs11223403,-0.445  
11,152.050,rs12365021,-0.410  
11,152.270,rs7926233,-0.609  
11,152.286,rs11602409,-0.608  
11,152.297,rs7945328,-0.601  
11,152.370,rs12804771,-0.572  
11,152.405,rs7939409,-0.569  
11,152.485,rs10791306,-0.691  
11,152.488,rs4936203,-0.691  
11,152.501,rs7927483,-0.696

11,152.508,rs903818,-0.681  
11,152.523,rs12279437,-0.614  
11,152.566,rs7102004,-0.628  
11,152.634,rs2723603,-0.649  
11,152.679,rs2723616,-0.661  
11,152.812,rs510306,-0.641  
11,152.889,rs329640,-0.727  
11,152.895,rs694424,-0.735  
11,152.901,rs3802924,-0.739  
11,152.935,rs1038480,-0.765  
11,152.947,rs329686,-0.794  
11,152.955,rs12364540,-0.811  
11,153.006,rs4937864,-0.803  
11,153.017,rs682386,-0.802  
11,153.023,rs585939,-0.800  
11,153.061,rs2017948,-0.834  
11,153.335,rs1551184,-0.719  
11,153.340,rs1031381,-0.717  
11,153.419,rs7112898,-0.690  
11,153.441,rs1669258,-0.682  
11,153.508,rs481252,-0.655  
11,153.542,rs10894799,-0.542  
11,153.557,rs10750560,-0.536  
11,153.568,rs7935733,-0.531  
11,153.571,rs3802928,-0.532  
11,153.614,rs729687,-0.528  
11,153.653,rs1866768,-0.499  
11,153.689,rs893949,-0.481  
11,153.716,rs7935790,-0.459  
11,153.746,rs11223842,-0.439  
11,153.773,rs7130091,-0.451  
11,153.779,rs10894831,-0.461  
11,153.855,rs7936730,-0.586  
11,153.870,rs3924413,-0.531  
11,153.878,rs6590745,-0.502  
11,153.885,rs7934698,-0.485  
11,153.914,rs7113440,-0.426  
11,153.917,rs4936241,-0.420  
11,153.940,rs11223911,-0.401  
11,154.114,rs11223936,-0.439  
11,154.127,rs3737494,-0.445  
11,154.160,rs1939726,-0.457  
11,154.171,rs11607363,-0.476  
11,154.219,rs10894861,-0.598  
11,154.221,rs7931468,-0.600  
11,154.229,rs4937951,-0.582  
11,154.231,rs11223991,-0.584  
11,154.271,rs1289459,-0.654  
11,154.320,rs931932,-0.703  
11,154.338,rs7106361,-0.706  
11,154.394,rs1892987,-0.644  
11,154.426,rs7125596,-0.609  
11,154.432,rs906628,-0.593  
11,154.434,rs7932186,-0.590  
11,154.470,rs7939829,-0.565  
11,154.477,rs4936257,-0.551  
11,154.514,rs2127077,-0.548  
11,154.563,rs6590781,-0.564  
11,154.653,rs1871265,-0.528  
11,154.706,rs10894947,-0.506  
12,0.116,rs10744648,-0.022



12,0.188,rs10849108,-0.032  
12,0.268,rs10774269,-0.035  
12,0.283,rs2286783,-0.035  
12,0.299,rs873134,-0.045  
12,0.347,rs12582126,-0.042  
12,0.367,rs12811910,-0.041  
12,0.411,rs756502,-0.032  
12,0.444,rs758791,-0.018  
12,0.453,rs1860613,-0.014  
12,0.456,rs9861,-0.014  
12,0.462,rs1468624,-0.014  
12,0.477,rs740895,-0.013  
12,0.599,rs11063806,-0.011  
12,0.624,rs722097,-0.011  
12,0.868,rs7298096,-0.020  
12,0.946,rs2887474,-0.022  
12,1.123,rs7300332,-0.020  
12,1.176,rs7137188,-0.020  
12,1.421,rs10849559,-0.033  
12,1.655,rs7305099,-0.046  
12,1.657,rs12309274,-0.046  
12,1.683,rs10849573,-0.055  
12,1.745,rs3924361,-0.083  
12,3.299,rs7973613,-0.141  
12,3.391,rs16928468,-0.145  
12,3.523,rs3741976,-0.153  
12,3.564,rs7296006,-0.156  
12,3.796,rs4765827,-0.158  
12,3.801,rs2369856,-0.158  
12,3.852,rs10773958,-0.155  
12,3.969,rs11061847,-0.128  
12,4.052,rs10491958,-0.108  
12,4.088,rs11061856,-0.103  
12,4.089,rs16928563,-0.103  
12,4.124,rs7969171,-0.080  
12,4.195,rs4765829,-0.051  
12,4.264,rs4766403,-0.036  
12,4.271,rs4766408,-0.036  
12,4.448,rs2108642,-0.062  
12,4.560,rs11608292,-0.067  
12,4.571,rs10437823,-0.077  
12,4.573,rs12827147,-0.062  
12,4.626,rs10848582,-0.100  
12,4.694,rs12307334,-0.096  
12,4.757,rs2429175,-0.103  
12,4.758,rs9669556,-0.103  
12,4.760,rs10505725,-0.104  
12,4.790,rs7302743,-0.161  
12,4.821,rs2239016,-0.184  
12,4.924,rs2238056,-0.237  
12,4.937,rs11062164,-0.237  
12,5.135,rs10848645,-0.225  
12,5.195,rs10848648,-0.223  
12,5.240,rs2238077,-0.250  
12,5.317,rs2887780,-0.258  
12,5.324,rs2239062,-0.256  
12,5.394,rs994901,-0.264  
12,5.417,rs10774043,-0.276  
12,5.455,rs4765687,-0.266  
12,5.461,rs10774048,-0.241  
12,5.524,rs2239089,-0.278

12,5.561,rs16929486,-0.282  
12,5.568,rs10848665,-0.283  
12,5.571,rs2283318,-0.251  
12,5.628,rs12231350,-0.250  
12,5.862,rs2238091,-0.225  
12,6.157,rs12229387,-0.186  
12,6.303,rs4075718,-0.190  
12,6.308,rs4409904,-0.189  
12,6.445,rs3814249,-0.165  
12,6.470,rs11062373,-0.166  
12,6.484,rs4766000,-0.163  
12,6.585,rs1860434,-0.133  
12,6.818,rs7138776,-0.132  
12,6.889,rs1894791,-0.123  
12,6.971,rs3782836,-0.138  
12,7.078,rs10848775,-0.142  
12,7.231,rs12820322,-0.120  
12,7.466,rs7315917,-0.133  
12,7.471,rs7973427,-0.134  
12,7.568,rs10848816,-0.158  
12,7.660,rs4765717,-0.182  
12,7.808,rs10848823,-0.195  
12,7.815,rs3741947,-0.194  
12,7.835,rs4766076,-0.188  
12,7.921,rs3782803,-0.203  
12,7.957,rs645722,-0.202  
12,8.238,rs727864,-0.186  
12,8.278,rs10848844,-0.188  
12,8.371,rs7134795,-0.217  
12,8.467,rs4238009,-0.240  
12,8.632,rs2878578,-0.254  
12,8.766,rs6489469,-0.245  
12,8.826,rs7305595,-0.240  
12,8.885,rs10848865,-0.237  
12,9.275,rs7972248,-0.223  
12,9.289,rs758612,-0.221  
12,9.479,rs876594,-0.190  
12,9.576,rs3741936,-0.150  
12,9.593,rs11062725,-0.124  
12,9.714,rs1029766,-0.101  
12,9.761,rs7978951,-0.100  
12,9.775,rs12368682,-0.098  
12,9.827,rs4766144,-0.092  
12,9.839,rs4766146,-0.091  
12,9.975,rs4766152,-0.077  
12,10.441,rs241981,-0.057  
12,10.478,rs241966,-0.069  
12,10.480,rs2013195,-0.069  
12,10.559,rs11062784,-0.074  
12,10.585,rs11062786,-0.077  
12,10.632,rs9300302,-0.084  
12,10.707,rs10128816,-0.116  
12,10.742,rs2109556,-0.119  
12,11.338,rs6489501,-0.180  
12,11.417,rs1419859,-0.209  
12,11.428,rs12581853,-0.209  
12,11.472,rs2058218,-0.210  
12,11.577,rs638977,-0.203  
12,11.643,rs688410,-0.199  
12,11.714,rs2578467,-0.196  
12,11.775,rs609018,-0.151

12,11.789,rs658719,-0.142  
12,11.797,rs631750,-0.137  
12,11.837,rs4491324,-0.130  
12,11.905,rs10848967,-0.114  
12,12.035,rs4238010,-0.059  
12,12.279,rs2532560,-0.039  
12,12.350,rs2540142,-0.036  
12,13.069,rs1861178,-0.063  
12,13.079,rs2041731,-0.063  
12,13.133,rs7300031,-0.066  
12,13.169,rs10849024,-0.054  
12,13.178,rs4411338,-0.050  
12,13.215,rs4766227,-0.029  
12,13.271,rs3217863,-0.024  
12,13.280,rs3217901,-0.024  
12,13.297,rs10505729,-0.020  
12,13.299,rs7133323,-0.020  
12,13.338,rs10849040,-0.033  
12,13.371,rs7962818,-0.031  
12,13.430,rs12820100,-0.031  
12,13.436,rs7135778,-0.030  
12,13.486,rs7306482,-0.019  
12,13.513,rs2970828,-0.014  
12,13.698,rs740059,-0.017  
12,13.707,rs10444471,-0.017  
12,13.712,rs12306837,-0.017  
12,13.730,rs4766258,-0.017  
12,13.742,rs2302251,-0.017  
12,13.797,rs7136668,-0.016  
12,13.931,rs4766276,-0.014  
12,14.121,rs17783679,-0.011  
12,14.191,rs9788072,-0.009  
12,14.278,rs12423234,-0.009  
12,14.297,rs7953164,-0.008  
12,14.361,rs2041381,-0.011  
12,14.454,rs2041379,-0.018  
12,14.465,rs2041377,-0.019  
12,14.488,rs10492061,-0.017  
12,14.509,rs6489582,-0.015  
12,14.620,rs10492062,-0.017  
12,14.650,rs2058287,-0.017  
12,14.765,rs996802,-0.010  
12,14.787,rs10492070,-0.009  
12,14.824,rs12831433,-0.008  
12,14.828,rs11832578,-0.008  
12,14.861,rs2109185,-0.007  
12,14.866,rs7297784,-0.007  
12,14.883,rs3759356,-0.007  
12,14.910,rs4766333,-0.008  
12,14.974,rs4765803,-0.005  
12,14.984,rs17179072,-0.005  
12,15.027,rs611652,-0.001  
12,15.058,rs1564372,-0.001  
12,15.099,rs534665,-0.002  
12,15.112,rs630325,-0.005  
12,15.129,rs7302032,-0.008  
12,15.146,rs7308861,-0.013  
12,15.155,rs10849223,-0.014  
12,15.163,rs7298856,-0.015  
12,15.179,rs7968928,-0.014  
12,15.234,rs7959202,-0.013

12,15.484,rs10849264,-0.012  
12,15.554,rs10744682,-0.011  
12,15.572,rs10492095,-0.011  
12,15.698,rs10849277,-0.009  
12,15.740,rs11063723,-0.008  
12,15.765,rs4073042,-0.009  
12,15.773,rs17181102,-0.011  
12,15.784,rs4930758,-0.015  
12,15.796,rs2193160,-0.018  
12,15.800,rs11614804,-0.018  
12,15.899,rs10849297,-0.023  
12,15.906,rs3759225,-0.022  
12,15.976,rs1558776,-0.014  
12,16.078,rs11609654,-0.002  
12,16.082,rs11063791,-0.001  
12,16.083,rs10492181,-0.003  
12,16.272,rs9669580,-0.010  
12,16.317,rs17785727,-0.012  
12,16.339,rs3782637,-0.013  
12,16.525,rs216298,-0.038  
12,16.570,rs4764482,-0.042  
12,16.616,rs3782711,-0.045  
12,16.726,rs7306706,-0.078  
12,17.018,rs2363880,-0.100  
12,17.022,rs797770,-0.100  
12,17.148,rs2268009,-0.091  
12,17.222,rs10849426,-0.087  
12,17.289,rs7304348,-0.095  
12,17.423,rs740842,-0.113  
12,17.511,rs4149577,-0.121  
12,17.581,rs6489711,-0.135  
12,17.662,rs3759333,-0.197  
12,17.696,rs2364482,-0.216  
12,17.773,rs10849451,-0.210  
12,17.868,rs2250246,-0.238  
12,17.871,rs3136551,-0.238  
12,17.874,rs25680,-0.237  
12,17.933,rs12964,-0.211  
12,18.133,rs917634,-0.210  
12,18.404,rs1639122,-0.179  
12,18.526,rs1045553,-0.195  
12,18.805,rs10774442,-0.240  
12,18.912,rs2302367,-0.240  
12,18.979,rs2301333,-0.225  
12,18.993,rs3782735,-0.249  
12,19.050,rs2707210,-0.280  
12,19.098,rs11064404,-0.289  
12,19.110,rs11064410,-0.291  
12,19.160,rs874627,-0.299  
12,19.164,rs2071081,-0.299  
12,19.206,rs4963517,-0.282  
12,19.496,rs2239167,-0.180  
12,19.540,rs1044189,-0.170  
12,19.655,rs1984564,-0.169  
12,19.888,rs7311672,-0.173  
12,20.127,rs3813729,-0.174  
12,20.147,rs12820834,-0.175  
12,20.270,rs7302230,-0.179  
12,20.301,rs4883422,-0.179  
12,20.435,rs2290241,-0.195  
12,20.506,rs4329748,-0.204

12,20.527,rs17789193,-0.204  
12,20.903,rs10844153,-0.223  
12,21.194,rs10845159,-0.233  
12,21.777,rs12296276,-0.191  
12,21.842,rs2377084,-0.186  
12,22.011,rs10845708,-0.217  
12,22.052,rs10772650,-0.225  
12,22.086,rs11609608,-0.224  
12,22.096,rs11055443,-0.224  
12,22.208,rs12310416,-0.258  
12,22.273,rs7976721,-0.256  
12,22.311,rs11833259,-0.249  
12,22.321,rs7959924,-0.248  
12,22.333,rs7300262,-0.245  
12,22.458,rs2889545,-0.198  
12,22.482,rs16916683,-0.190  
12,22.504,rs12369506,-0.195  
12,22.547,rs10846078,-0.189  
12,22.642,rs6488767,-0.177  
12,22.753,rs4310684,-0.101  
12,22.755,rs10734891,-0.100  
12,22.838,rs11057065,-0.073  
12,22.866,rs2377419,-0.066  
12,22.933,rs17728930,-0.057  
12,22.942,rs17728942,-0.055  
12,22.971,rs4294628,-0.055  
12,22.977,rs7310448,-0.055  
12,23.430,rs7978532,-0.124  
12,23.484,rs10770855,-0.130  
12,23.515,rs4388945,-0.123  
12,23.553,rs2028373,-0.133  
12,23.555,rs3794318,-0.133  
12,23.555,rs2580874,-0.133  
12,23.651,rs7132012,-0.083  
12,23.728,rs2969097,-0.058  
12,23.829,rs10161484,-0.036  
12,23.863,rs1344454,-0.048  
12,23.886,rs2377609,-0.049  
12,23.896,rs16917857,-0.048  
12,23.896,rs1476910,-0.048  
12,23.913,rs4883195,-0.042  
12,23.950,rs12821842,-0.030  
12,23.996,rs4882978,-0.019  
12,24.018,rs3213831,-0.016  
12,24.024,rs3741849,-0.015  
12,24.044,rs717178,-0.013  
12,24.083,rs741623,-0.007  
12,24.085,rs10492109,-0.007  
12,24.190,rs2058429,-0.001  
12,24.209,rs1863871,-0.001  
12,24.266,rs11053043,0.001  
12,24.271,rs917915,0.001  
12,24.302,rs1597097,0.001  
12,24.303,rs7313141,0.001  
12,24.355,rs4764107,0.007  
12,24.559,rs10772223,0.018  
12,24.636,rs2200745,0.022  
12,24.849,rs6488255,0.025  
12,24.861,rs7314021,0.028  
12,24.893,rs10505755,0.034  
12,24.931,rs10845073,0.027

12,25.015,rs10772257,0.014  
12,25.018,rs2537760,0.014  
12,25.037,rs10734827,0.014  
12,25.057,rs11053781,0.018  
12,25.205,rs2607900,0.023  
12,25.212,rs4763206,0.023  
12,25.218,rs9988929,0.024  
12,25.283,rs10845203,0.033  
12,25.311,rs753202,0.034  
12,25.317,rs17809949,0.034  
12,25.317,rs797178,0.034  
12,25.328,rs7316817,0.034  
12,25.438,rs1015443,0.029  
12,25.520,rs10772420,0.034  
12,25.728,rs1863842,0.047  
12,25.760,rs2059764,0.059  
12,26.098,rs7960118,0.018  
12,26.225,rs2416791,0.012  
12,26.313,rs11054372,0.006  
12,26.646,rs205534,0.000  
12,26.712,rs2856320,-0.000  
12,27.145,rs3802993,-0.000  
12,27.167,rs11054454,-0.000  
12,27.226,rs2856328,-0.000  
12,27.233,rs2856329,-0.000  
12,27.233,rs2856330,-0.000  
12,27.242,rs762718,-0.000  
12,27.388,rs2710293,0.006  
12,27.436,rs2515767,0.009  
12,27.461,rs11836917,0.011  
12,27.509,rs10505762,0.019  
12,27.526,rs2238122,0.021  
12,27.555,rs2855711,0.017  
12,27.581,rs2954930,0.014  
12,27.617,rs2954932,0.010  
12,27.632,rs6488467,0.008  
12,27.643,rs7300814,0.006  
12,27.657,rs4763263,0.004  
12,27.676,rs7962986,0.002  
12,27.759,rs10845459,0.003  
12,27.771,rs1544669,-0.000  
12,27.780,rs2430605,0.000  
12,27.792,rs16907705,0.000  
12,27.798,rs2160523,0.000  
12,27.805,rs2448050,0.000  
12,27.810,rs4763780,-0.000  
12,27.899,rs11054721,0.002  
12,28.223,rs7976685,-0.001  
12,28.381,rs3741800,-0.004  
12,28.399,rs7968375,-0.004  
12,28.751,rs11834080,-0.001  
12,28.896,rs10845568,-0.002  
12,28.922,rs7309730,-0.002  
12,29.144,rs1014448,-0.010  
12,29.202,rs873218,-0.010  
12,29.213,rs10743992,-0.010  
12,29.355,rs10492239,-0.010  
12,29.361,rs11055008,-0.009  
12,29.521,rs34330,-0.008  
12,29.617,rs4763870,-0.002  
12,29.642,rs16908404,-0.001

12,29.709,rs7956578,-0.001  
12,29.741,rs7301803,-0.001  
12,29.903,rs7314463,-0.000  
12,29.976,rs7961672,-0.001  
12,29.978,rs2417235,-0.001  
12,30.069,rs11055126,-0.004  
12,30.078,rs3863345,-0.004  
12,30.091,rs4763305,-0.004  
12,30.154,rs2160667,-0.001  
12,30.172,rs3782572,-0.001  
12,30.414,rs929683,-0.006  
12,30.817,rs3825271,-0.012  
12,30.870,rs3736209,-0.013  
12,30.918,rs17820032,-0.015  
12,30.984,rs10772624,-0.013  
12,31.021,rs10845715,-0.006  
12,31.031,rs3812820,-0.007  
12,31.055,rs7979618,-0.007  
12,31.077,rs2061868,-0.007  
12,31.140,rs7314446,-0.002  
12,31.142,rs11837280,-0.002  
12,31.147,rs1382679,-0.006  
12,31.190,rs1805510,-0.005  
12,31.230,rs2160519,-0.004  
12,31.269,rs2268102,-0.003  
12,31.292,rs7972662,-0.003  
12,31.318,rs2284411,-0.003  
12,31.322,rs11610518,-0.003  
12,31.418,rs2300272,-0.004  
12,31.423,rs2160730,-0.004  
12,31.497,rs10845852,-0.003  
12,31.580,rs219922,-0.007  
12,31.606,rs10505778,-0.007  
12,31.607,rs1421106,-0.007  
12,31.613,rs1421108,-0.007  
12,31.688,rs1861872,-0.005  
12,31.732,rs10505780,-0.005  
12,31.788,rs11055747,-0.003  
12,31.871,rs10845886,-0.003  
12,31.954,rs12809105,-0.004  
12,32.128,rs6488666,-0.012  
12,32.148,rs17834211,-0.012  
12,32.170,rs12425125,-0.011  
12,32.187,rs11055891,-0.010  
12,32.218,rs10083074,-0.013  
12,32.576,rs4576875,-0.007  
12,32.577,rs7298685,-0.007  
12,32.687,rs3827886,-0.006  
12,32.784,rs2302888,-0.005  
12,32.914,rs2287538,-0.006  
12,32.967,rs1362599,-0.006  
12,32.984,rs6488713,-0.007  
12,33.023,rs4236,-0.003  
12,33.063,rs11056267,-0.001  
12,33.082,rs2445402,-0.000  
12,33.112,rs7308621,-0.001  
12,33.137,rs7131767,-0.001  
12,33.138,rs10846153,-0.001  
12,33.144,rs7956773,-0.001  
12,33.193,rs1117152,-0.002  
12,33.291,rs1461039,0.000

12,33.387,rs11611715,-0.000  
12,33.420,rs12230341,-0.000  
12,33.471,rs3748299,-0.001  
12,33.566,rs6488792,-0.001  
12,33.571,rs11612558,-0.001  
12,33.662,rs10772874,-0.000  
12,33.922,rs3782545,0.005  
12,33.937,rs1450981,0.006  
12,33.953,rs7980712,0.006  
12,33.958,rs7971685,0.007  
12,33.995,rs11056760,0.007  
12,34.130,rs1450974,0.002  
12,34.229,rs1358251,0.000  
12,34.246,rs1799455,0.000  
12,34.318,rs10505797,0.000  
12,34.498,rs1671476,0.000  
12,34.534,rs3847924,0.000  
12,34.669,rs10744116,0.000  
12,34.895,rs6488844,0.008  
12,35.050,rs726206,0.009  
12,35.127,rs12425910,0.008  
12,35.190,rs7135281,0.010  
12,35.211,rs11057006,0.011  
12,35.246,rs11057009,0.012  
12,35.247,rs16912067,0.012  
12,35.261,rs10846387,0.010  
12,35.312,rs366281,0.007  
12,35.320,rs7963143,0.005  
12,35.342,rs1163959,0.008  
12,35.394,rs10840729,0.010  
12,35.414,rs1912879,0.011  
12,35.497,rs2437983,0.005  
12,35.511,rs729953,0.005  
12,35.684,rs10840919,0.007  
12,35.745,rs10129026,0.007  
12,35.843,rs7139425,0.011  
12,35.866,rs4614516,0.011  
12,35.868,rs7952873,0.012  
12,35.934,rs11044004,0.018  
12,35.996,rs12297325,0.017  
12,36.073,rs1374670,0.015  
12,36.160,rs1816971,0.011  
12,36.179,rs4763508,0.014  
12,36.191,rs982754,0.016  
12,36.216,rs11833512,0.015  
12,36.285,rs10841096,0.016  
12,36.319,rs10841098,0.021  
12,36.384,rs10841121,0.032  
12,36.385,rs16914912,0.032  
12,37.040,rs10841245,0.022  
12,37.218,rs7312615,0.024  
12,37.291,rs10841289,0.022  
12,37.338,rs10841298,0.021  
12,37.352,rs6486999,0.020  
12,37.455,rs10841322,0.019  
12,37.468,rs7960116,0.019  
12,37.472,rs4441088,0.020  
12,37.508,rs10841335,0.021  
12,37.609,rs2731629,0.017  
12,37.635,rs2259656,0.017  
12,37.672,rs2731612,0.017



12,37.714,rs1565592,0.016  
12,37.761,rs941223,0.015  
12,37.847,rs10841399,0.019  
12,37.858,rs7970229,0.019  
12,37.872,rs2694992,0.019  
12,37.995,rs10437774,0.025  
12,38.102,rs11045000,0.017  
12,38.324,rs7302242,0.004  
12,38.350,rs12812722,0.003  
12,38.364,rs7964046,0.003  
12,38.462,rs1427988,0.003  
12,38.469,rs10505867,0.003  
12,38.505,rs1991458,0.003  
12,38.523,rs1863961,0.002  
12,38.605,rs2417848,0.000  
12,39.033,rs10841495,-0.001  
12,39.043,rs10841496,-0.003  
12,39.050,rs10841497,-0.023  
12,39.140,rs17324684,-0.027  
12,39.180,rs4762956,-0.029  
12,39.190,rs10770660,-0.028  
12,39.195,rs7304649,-0.019  
12,39.231,rs4325354,-0.017  
12,39.232,rs4502032,-0.017  
12,39.244,rs7300210,-0.012  
12,39.268,rs4378443,-0.009  
12,39.271,rs7300068,-0.008  
12,39.292,rs11045392,-0.003  
12,39.302,rs12368457,-0.002  
12,39.309,rs11045417,-0.002  
12,39.318,rs12371796,-0.003  
12,39.505,rs4149064,0.001  
12,39.514,rs987839,0.002  
12,39.535,rs7980842,0.002  
12,39.552,rs16923663,0.003  
12,40.028,rs4762699,0.029  
12,40.264,rs7137767,0.028  
12,40.335,rs5486,0.029  
12,40.725,rs2417978,0.026  
12,41.248,rs3782660,0.026  
12,41.438,rs17684048,0.027  
12,41.461,rs759088,0.027  
12,41.542,rs16924082,0.037  
12,41.609,rs860447,0.037  
12,41.730,rs11046207,0.035  
12,41.735,rs1283822,0.035  
12,41.826,rs10743428,0.037  
12,41.882,rs10841923,0.029  
12,41.899,rs11046265,0.039  
12,41.945,rs7968922,0.047  
12,41.948,rs10770887,0.047  
12,42.005,rs918130,0.069  
12,42.150,rs2728827,0.073  
12,42.495,rs261926,0.076  
12,42.497,rs261940,0.075  
12,42.506,rs10505887,0.069  
12,42.517,rs6416228,0.073  
12,42.532,rs10842063,0.079  
12,42.558,rs260879,0.037  
12,42.567,rs10842067,0.025  
12,42.574,rs2418082,0.020

12,42.584,rs10842074,0.016  
12,42.596,rs17175003,0.012  
12,42.597,rs12581592,0.012  
12,42.614,rs2466886,0.006  
12,42.623,rs978816,0.004  
12,42.676,rs2453872,0.006  
12,42.731,rs3847890,0.003  
12,42.744,rs12226934,0.003  
12,42.749,rs3847896,0.003  
12,42.760,rs3847899,0.005  
12,42.771,rs3913139,0.006  
12,42.774,rs11046751,0.006  
12,42.778,rs3913141,0.007  
12,42.788,rs16925680,0.007  
12,42.915,rs763853,0.020  
12,42.927,rs1379474,0.021  
12,43.311,rs7298590,0.024  
12,43.377,rs744348,0.023  
12,43.438,rs7963980,0.022  
12,43.472,rs7972005,0.022  
12,43.481,rs2127310,0.023  
12,43.498,rs10771005,0.026  
12,43.532,rs10771009,0.031  
12,43.566,rs10842199,0.031  
12,43.625,rs11047047,0.013  
12,43.631,rs12580229,0.012  
12,43.648,rs725124,0.010  
12,43.708,rs10842220,0.011  
12,43.722,rs17474391,0.011  
12,43.811,rs7305773,0.014  
12,43.827,rs9804988,0.014  
12,43.831,rs12820848,0.014  
12,44.250,rs12581992,0.013  
12,44.326,rs10505924,0.019  
12,44.337,rs989657,0.019  
12,44.419,rs11047225,0.020  
12,44.605,rs11047263,0.022  
12,44.638,rs2030130,0.016  
12,44.690,rs16927236,0.012  
12,44.691,rs12708363,0.007  
12,44.692,rs11047279,0.007  
12,44.699,rs10743492,0.007  
12,44.748,rs4131755,0.006  
12,44.922,rs1357251,0.008  
12,44.933,rs2728843,0.009  
12,45.059,rs10842304,0.004  
12,45.121,rs10505939,0.008  
12,45.147,rs577958,0.008  
12,45.219,rs2055731,0.008  
12,45.265,rs939856,0.004  
12,45.303,rs550338,0.004  
12,45.309,rs521144,0.004  
12,45.353,rs12827160,0.003  
12,45.383,rs1553671,0.002  
12,45.400,rs1396204,0.005  
12,45.400,rs1396205,0.005  
12,45.439,rs11047426,0.006  
12,45.509,rs4465447,0.006  
12,45.624,rs1487657,0.003  
12,45.722,rs10842390,0.002  
12,45.727,rs11047560,0.002

12,45.758,rs11047576,0.003  
12,45.773,rs4963783,0.003  
12,45.790,rs964447,0.003  
12,45.845,rs7485690,0.003  
12,45.883,rs11047652,0.003  
12,45.916,rs6487429,0.005  
12,46.072,rs924191,0.014  
12,46.082,rs7305924,0.014  
12,46.209,rs3782185,0.013  
12,46.220,rs12426622,0.012  
12,46.273,rs699031,0.012  
12,46.305,rs699039,0.011  
12,46.370,rs859198,0.006  
12,46.396,rs962656,0.005  
12,46.480,rs859153,0.002  
12,46.787,rs12579073,0.000  
12,46.862,rs12320328,-0.000  
12,46.866,rs6487465,-0.000  
12,46.917,rs7303282,-0.000  
12,47.062,rs4130755,-0.000  
12,47.132,rs7964381,-0.000  
12,47.154,rs9300166,-0.000  
12,47.237,rs2340376,-0.000  
12,47.276,rs7135769,-0.001  
12,47.351,rs10771219,-0.003  
12,47.381,rs11048064,-0.003  
12,47.418,rs1479509,-0.003  
12,47.429,rs7306993,-0.003  
12,47.585,rs16929064,-0.003  
12,47.790,rs7303492,-0.004  
12,48.229,rs7134325,-0.006  
12,48.253,rs853516,-0.006  
12,48.289,rs12306745,-0.004  
12,48.413,rs706540,-0.001  
12,48.648,rs11048376,0.002  
12,48.675,rs11048393,0.003  
12,48.769,rs6487539,0.008  
12,48.784,rs11048431,0.009  
12,48.802,rs16930371,0.010  
12,48.811,rs1464054,0.012  
12,48.827,rs7975017,0.014  
12,48.862,rs12303723,0.020  
12,48.865,rs10842712,0.020  
12,48.878,rs2171520,0.029  
12,48.896,rs10771279,0.029  
12,48.898,rs10771281,0.026  
12,48.902,rs11614012,0.030  
12,48.906,rs12229047,0.030  
12,48.938,rs12366669,0.030  
12,48.959,rs1565190,0.034  
12,49.071,rs11048627,0.035  
12,49.109,rs10771293,0.037  
12,49.116,rs11048661,0.037  
12,49.120,rs11048665,0.036  
12,49.179,rs1994474,0.028  
12,49.234,rs7312159,0.023  
12,49.259,rs3210635,0.022  
12,49.320,rs1388658,0.026  
12,49.328,rs1484087,0.027  
12,49.351,rs1388659,0.026  
12,49.423,rs841614,0.025

12,49.582,rs7297695,0.023  
12,49.905,rs11048977,0.021  
12,50.124,rs16931921,0.022  
12,50.516,rs11048994,0.024  
12,50.564,rs4964060,0.030  
12,50.679,rs10843013,0.041  
12,50.715,rs7978444,0.046  
12,50.778,rs27633,0.059  
12,50.792,rs42294,0.060  
12,50.838,rs7976725,0.054  
12,50.886,rs10843085,0.046  
12,51.193,rs1552760,0.026  
12,51.385,rs12314459,0.029  
12,51.389,rs12819319,0.029  
12,51.439,rs12368897,0.031  
12,51.490,rs10506041,0.025  
12,51.516,rs7962495,0.026  
12,51.639,rs7308031,0.031  
12,51.707,rs1387246,0.024  
12,51.861,rs2196488,0.023  
12,51.993,rs11050146,0.019  
12,52.070,rs10771512,0.019  
12,52.257,rs1436321,0.025  
12,52.380,rs10843438,0.020  
12,52.384,rs7311526,0.018  
12,52.398,rs299441,0.011  
12,52.400,rs2216859,0.012  
12,52.565,rs10771553,0.026  
12,52.574,rs7955592,0.021  
12,52.621,rs12823875,0.044  
12,52.648,rs2033036,0.045  
12,52.662,rs16934752,0.040  
12,52.690,rs2216979,0.024  
12,52.715,rs7959334,0.012  
12,52.725,rs61803,0.012  
12,52.761,rs302334,0.010  
12,52.763,rs302335,0.010  
12,52.927,rs2220130,0.008  
12,53.054,rs10843570,0.011  
12,53.099,rs2647384,0.012  
12,53.108,rs11050595,0.012  
12,53.158,rs10506052,0.014  
12,53.158,rs10506053,0.015  
12,53.202,rs6487871,0.028  
12,53.244,rs7959715,0.038  
12,53.244,rs12579700,0.038  
12,53.372,rs7297032,0.058  
12,53.438,rs10843660,0.053  
12,53.506,rs10843712,0.054  
12,53.529,rs4032080,0.057  
12,53.713,rs1905675,0.053  
12,53.726,rs16906532,0.049  
12,53.730,rs794165,0.048  
12,53.731,rs11050953,0.048  
12,53.742,rs956503,0.045  
12,53.766,rs1258276,0.050  
12,53.828,rs6487927,0.040  
12,53.907,rs11051065,0.062  
12,53.926,rs2434118,0.067  
12,53.947,rs2352525,0.067  
12,53.958,rs10843843,0.070

12,53.966,rs33162,0.071  
12,53.984,rs11612603,0.048  
12,53.995,rs256722,0.048  
12,54.022,rs807477,0.046  
12,54.034,rs33219,0.038  
12,54.039,rs7979386,0.037  
12,54.048,rs11613187,0.036  
12,54.057,rs10771783,0.039  
12,54.060,rs2075367,0.051  
12,54.096,rs11051189,0.047  
12,54.109,rs4931398,0.051  
12,54.126,rs1009290,0.048  
12,54.128,rs35065,0.048  
12,54.237,rs10843881,0.038  
12,54.302,rs10843894,0.037  
12,54.441,rs684454,0.031  
12,54.446,rs7954014,0.056  
12,54.511,rs4931477,0.048  
12,54.607,rs2568901,0.052  
12,55.021,rs7312635,0.028  
12,55.023,rs10771858,0.028  
12,55.024,rs11051493,0.028  
12,55.045,rs2170768,0.025  
12,55.085,rs6488004,0.021  
12,55.092,rs7314409,0.021  
12,55.096,rs6488007,0.023  
12,55.103,rs1150965,0.031  
12,55.109,rs11051595,0.031  
12,55.142,rs1259704,0.028  
12,55.156,rs1666224,0.027  
12,55.201,rs10844075,0.034  
12,55.213,rs4931593,0.035  
12,55.215,rs10844087,0.035  
12,55.236,rs2388966,0.028  
12,55.240,rs2630583,0.029  
12,55.245,rs2630594,0.030  
12,55.255,rs3867162,0.026  
12,55.277,rs7961369,0.018  
12,55.278,rs1809241,0.035  
12,55.322,rs2593996,0.036  
12,55.338,rs155202,0.030  
12,55.342,rs325435,0.029  
12,55.354,rs2651364,0.026  
12,55.394,rs4931016,0.019  
12,55.394,rs10844235,0.019  
12,55.430,rs11052134,0.028  
12,55.463,rs10771991,0.037  
12,55.502,rs7954545,0.042  
12,55.506,rs7977818,0.043  
12,55.509,rs11610384,0.043  
12,55.562,rs17554434,0.061  
12,55.719,rs11053068,0.059  
12,55.757,rs11053191,0.056  
12,56.465,rs7313317,0.052  
12,56.487,rs826893,0.052  
12,56.500,rs12308699,0.051  
12,56.505,rs10506128,0.051  
12,56.512,rs11169878,0.051  
12,56.922,rs718150,0.045  
12,56.934,rs11170859,0.045  
12,56.941,rs4403834,0.045

12,56.947,rs7966147,0.045  
12,56.966,rs4565943,0.046  
12,57.051,rs11171902,0.041  
12,57.079,rs7974928,0.040  
12,57.160,rs12582802,0.033  
12,57.184,rs4129477,0.032  
12,57.251,rs11611119,0.034  
12,57.333,rs7969011,0.037  
12,57.347,rs545385,0.037  
12,57.363,rs7964150,0.037  
12,57.406,rs4768212,0.035  
12,57.437,rs726330,0.034  
12,57.444,rs2638259,0.033  
12,57.470,rs2723260,0.028  
12,57.548,rs10735934,0.024  
12,57.554,rs11176143,0.024  
12,57.584,rs11564263,0.023  
12,57.612,rs10784618,0.032  
12,57.614,rs11564228,0.032  
12,57.693,rs7960018,0.032  
12,57.703,rs10506170,0.032  
12,57.717,rs17128536,0.028  
12,57.735,rs11177540,0.024  
12,57.745,rs1918954,0.022  
12,57.793,rs1584093,0.021  
12,57.817,rs10879153,0.021  
12,57.842,rs1119059,0.020  
12,57.894,rs11178907,0.011  
12,57.895,rs12316203,0.010  
12,57.928,rs1442192,0.010  
12,57.997,rs12304938,0.007  
12,58.008,rs534783,0.007  
12,58.139,rs12314080,0.004  
12,58.276,rs285595,0.009  
12,58.306,rs366921,0.012  
12,58.358,rs10785280,0.019  
12,58.400,rs904076,0.037  
12,58.400,rs11181154,0.037  
12,58.459,rs2215455,0.054  
12,58.473,rs10880209,0.048  
12,58.480,rs1234028,0.046  
12,58.602,rs6582383,0.051  
12,58.715,rs1563419,0.042  
12,58.874,rs12822031,0.025  
12,58.900,rs10785347,0.021  
12,58.944,rs10880328,0.020  
12,58.956,rs7962244,0.020  
12,58.966,rs11181615,0.019  
12,58.977,rs10785367,0.012  
12,58.980,rs4480597,0.011  
12,59.072,rs2468330,0.004  
12,59.104,rs1474071,0.003  
12,59.119,rs10880377,0.003  
12,59.134,rs7962560,0.003  
12,59.160,rs7311715,0.005  
12,59.201,rs10785408,0.001  
12,59.228,rs1185604,-0.001  
12,59.252,rs10880418,-0.000  
12,59.400,rs2134067,0.000  
12,59.414,rs7954281,0.000  
12,59.563,rs2047770,-0.000

12,59.587,rs166700,-0.000  
12,59.629,rs277248,-0.000  
12,59.632,rs277241,-0.000  
12,59.661,rs986191,-0.000  
12,59.917,rs11182382,0.001  
12,60.090,rs12828607,0.003  
12,60.155,rs10506247,0.007  
12,60.184,rs869628,0.007  
12,60.254,rs1037435,0.013  
12,60.268,rs12423103,0.013  
12,60.306,rs10506255,0.016  
12,60.329,rs1551082,0.026  
12,60.361,rs2710459,0.028  
12,60.436,rs7975969,0.030  
12,60.464,rs10467207,0.030  
12,61.116,rs10880789,0.031  
12,61.353,rs2408268,0.028  
12,61.377,rs7964768,0.029  
12,61.441,rs2544098,0.027  
12,61.466,rs10880823,0.027  
12,61.509,rs10082730,0.029  
12,61.618,rs10492248,0.049  
12,62.153,rs17662709,0.023  
12,62.200,rs1012642,0.022  
12,62.284,rs7967938,0.020  
12,62.325,rs7304591,0.013  
12,62.328,rs1373549,0.013  
12,62.394,rs1867500,0.001  
12,62.414,rs7301594,0.000  
12,62.417,rs2053648,0.001  
12,62.420,rs3742060,0.000  
12,62.441,rs11615731,-0.000  
12,62.442,rs11183395,-0.000  
12,62.442,rs12828089,0.001  
12,62.461,rs11183403,0.001  
12,62.708,rs10785630,0.000  
12,62.785,rs4768745,0.000  
12,62.859,rs11183620,0.000  
12,62.988,rs17097506,0.002  
12,63.018,rs854889,0.002  
12,63.025,rs739706,0.003  
12,63.032,rs727363,0.004  
12,63.036,rs11610123,0.004  
12,63.039,rs17097611,0.005  
12,63.041,rs1880601,0.005  
12,63.056,rs12320513,0.006  
12,63.083,rs9888310,0.006  
12,63.107,rs214710,0.007  
12,63.113,rs214697,0.007  
12,63.133,rs12315929,0.006  
12,63.144,rs214678,0.007  
12,63.163,rs214656,0.011  
12,63.169,rs855137,0.019  
12,63.204,rs11183921,0.025  
12,63.210,rs7955860,0.023  
12,63.225,rs1468195,0.020  
12,63.283,rs1029429,0.014  
12,63.301,rs11168123,0.015  
12,63.418,rs1153978,0.021  
12,63.472,rs929270,0.024  
12,63.515,rs4760653,0.031

12,63.528,rs3759407,0.033  
12,63.535,rs757344,0.035  
12,63.537,rs11168249,0.036  
12,63.542,rs1859281,0.040  
12,63.569,rs2239182,0.072  
12,63.586,rs4760648,0.075  
12,63.697,rs7299704,0.049  
12,63.823,rs7134565,0.025  
12,63.900,rs2732439,0.023  
12,63.946,rs4489787,0.019  
12,63.990,rs2731063,0.014  
12,64.045,rs3782353,0.008  
12,64.126,rs10875914,0.005  
12,64.163,rs833836,0.005  
12,64.375,rs11834543,0.009  
12,64.463,rs7486836,0.004  
12,64.478,rs12322335,0.004  
12,64.570,rs4898506,0.003  
12,64.687,rs1031477,0.002  
12,64.992,rs836964,0.003  
12,65.111,rs956864,0.001  
12,65.167,rs638515,0.002  
12,65.186,rs297941,0.003  
12,65.213,rs296736,0.014  
12,65.242,rs1996315,0.022  
12,65.284,rs602772,0.022  
12,65.294,rs7131715,0.022  
12,66.736,rs2684908,0.003  
12,66.997,rs4768933,0.001  
12,67.436,rs10876136,0.005  
12,67.749,rs10783425,0.003  
12,67.830,rs17125588,0.002  
12,67.941,rs4762042,0.002  
12,68.024,rs907347,0.001  
12,68.074,rs3825219,0.014  
12,68.075,rs3759177,0.014  
12,68.077,rs7299315,0.014  
12,68.107,rs1021996,0.007  
12,68.357,rs7305599,0.006  
12,68.609,rs10876202,0.002  
12,68.830,rs6580842,0.001  
12,68.871,rs2083600,0.001  
12,68.874,rs303797,0.001  
12,68.876,rs7976059,0.001  
12,68.880,rs1566869,0.001  
12,68.898,rs2859593,0.000  
12,68.907,rs12809597,0.000  
12,68.924,rs1283168,0.001  
12,68.929,rs2701129,0.000  
12,68.939,rs6580850,-0.000  
12,69.007,rs7300165,-0.001  
12,69.029,rs12312219,-0.001  
12,69.044,rs10783492,-0.002  
12,69.055,rs10876239,-0.003  
12,69.056,rs11829800,-0.003  
12,69.056,rs9669529,-0.003  
12,69.073,rs2085502,-0.011  
12,69.075,rs11170034,-0.011  
12,69.084,rs17704963,-0.010  
12,69.144,rs7300317,-0.007  
12,69.213,rs6580873,-0.001



12,69.240,rs6580876,-0.000  
12,69.339,rs1732285,0.000  
12,69.377,rs928993,0.000  
12,69.432,rs597340,0.001  
12,69.539,rs11170164,0.003  
12,69.540,rs12821071,0.003  
12,69.558,rs669379,0.003  
12,69.564,rs644524,0.003  
12,69.582,rs10747643,0.003  
12,69.608,rs637608,0.004  
12,69.647,rs7295084,0.004  
12,69.711,rs589619,0.004  
12,69.761,rs2741158,0.005  
12,69.834,rs662170,0.017  
12,69.855,rs1521338,0.018  
12,69.932,rs4454802,0.017  
12,69.933,rs1994755,0.017  
12,69.952,rs876407,0.007  
12,70.037,rs11170319,0.004  
12,70.093,rs2055036,0.004  
12,70.147,rs10876395,0.000  
12,70.188,rs10431493,-0.000  
12,70.221,rs2280699,-0.000  
12,70.305,rs1554753,-0.000  
12,70.306,rs3741434,-0.000  
12,70.353,rs4758963,-0.000  
12,70.513,rs784563,-0.000  
12,70.817,rs1864448,-0.001  
12,70.834,rs17765253,-0.001  
12,70.841,rs12309211,-0.001  
12,70.849,rs3741659,-0.005  
12,70.920,rs6580960,-0.009  
12,70.967,rs17103077,-0.012  
12,70.997,rs11170702,-0.012  
12,71.067,rs6580968,-0.021  
12,71.148,rs10735853,-0.034  
12,71.199,rs2366150,-0.030  
12,71.250,rs4759316,-0.028  
12,71.346,rs2067554,-0.031  
12,71.459,rs7310681,-0.022  
12,71.486,rs12322894,-0.022  
12,71.721,rs7964528,-0.032  
12,71.775,rs3825192,-0.030  
12,71.863,rs10783629,-0.034  
12,71.867,rs7299852,-0.034  
12,71.886,rs7310321,-0.035  
12,71.904,rs2270581,-0.035  
12,71.904,rs1795838,-0.035  
12,71.921,rs7974201,-0.035  
12,71.925,rs4758966,-0.035  
12,71.959,rs3782410,-0.043  
12,71.962,rs1249950,-0.044  
12,72.018,rs11832807,-0.059  
12,72.049,rs1495926,-0.063  
12,72.070,rs7964380,-0.067  
12,72.083,rs1692108,-0.065  
12,72.132,rs266667,-0.044  
12,72.145,rs2124048,-0.039  
12,72.259,rs17116558,-0.032  
12,72.314,rs7135506,-0.027  
12,72.332,rs1463652,-0.027

12,72.377,rs2710697,-0.023  
12,72.410,rs2633414,-0.022  
12,72.655,rs10876739,-0.011  
12,72.658,rs6581029,-0.011  
12,72.686,rs7132600,-0.013  
12,72.892,rs10876902,-0.048  
12,72.969,rs17541818,-0.043  
12,72.983,rs17445108,-0.043  
12,73.017,rs10876931,-0.043  
12,73.050,rs7314055,-0.033  
12,73.077,rs733629,-0.034  
12,73.103,rs1059513,-0.035  
12,73.109,rs324013,-0.035  
12,73.135,rs1800159,-0.033  
12,73.193,rs7486863,-0.012  
12,73.258,rs11172171,-0.013  
12,73.389,rs3809114,-0.015  
12,73.416,rs3825080,-0.016  
12,73.558,rs812315,-0.018  
12,73.722,rs12368653,-0.018  
12,73.902,rs17119981,-0.016  
12,73.921,rs1908537,-0.022  
12,73.921,rs11612472,-0.023  
12,73.927,rs6581191,-0.029  
12,73.930,rs4760224,-0.027  
12,73.939,rs2354997,-0.034  
12,73.945,rs10877143,-0.040  
12,73.958,rs4297507,-0.046  
12,73.959,rs2061202,-0.047  
12,73.962,rs10506363,-0.047  
12,73.969,rs7299020,-0.048  
12,73.990,rs2712506,-0.049  
12,74.021,rs957989,-0.053  
12,74.164,rs10783929,-0.085  
12,74.214,rs1850126,-0.083  
12,74.267,rs2221158,-0.083  
12,74.398,rs10877263,-0.111  
12,74.452,rs10877278,-0.117  
12,74.511,rs276046,-0.119  
12,74.511,rs7304975,-0.119  
12,74.757,rs7956657,-0.118  
12,74.768,rs10431559,-0.117  
12,74.923,rs7297578,-0.118  
12,74.951,rs12306142,-0.118  
12,74.960,rs10877395,-0.118  
12,75.386,rs4758868,-0.108  
12,75.947,rs2620870,-0.131  
12,76.209,rs4340119,-0.126  
12,76.219,rs10877601,-0.125  
12,76.369,rs10784209,-0.114  
12,76.375,rs2731375,-0.115  
12,76.523,rs1901887,-0.152  
12,76.556,rs1377613,-0.155  
12,76.595,rs7296490,-0.153  
12,76.772,rs6581420,-0.157  
12,76.937,rs3759288,-0.190  
12,76.948,rs10877756,-0.192  
12,76.957,rs7311671,-0.191  
12,77.063,rs10877775,-0.193  
12,77.186,rs1146077,-0.220  
12,77.234,rs1245438,-0.221

12,77.262,rs11174355,-0.218  
12,77.291,rs1920086,-0.240  
12,77.507,rs11174449,-0.220  
12,77.697,rs7958597,-0.232  
12,77.794,rs10877895,-0.229  
12,77.805,rs4763185,-0.225  
12,77.810,rs2172930,-0.223  
12,77.818,rs10506445,-0.223  
12,77.844,rs1733488,-0.223  
12,77.855,rs11174601,-0.222  
12,77.871,rs3951389,-0.220  
12,77.896,rs2270484,-0.223  
12,77.917,rs11174629,-0.225  
12,77.933,rs4763194,-0.245  
12,77.971,rs549433,-0.285  
12,78.017,rs12829836,-0.299  
12,78.031,rs10506451,-0.334  
12,78.051,rs337514,-0.237  
12,78.068,rs10506454,-0.223  
12,78.095,rs699573,-0.253  
12,78.115,rs7296020,-0.298  
12,78.124,rs772577,-0.346  
12,78.130,rs699588,-0.351  
12,78.148,rs12311870,-0.369  
12,78.251,rs1250148,-0.480  
12,78.260,rs12814605,-0.489  
12,78.274,rs3913039,-0.501  
12,78.314,rs10877951,-0.520  
12,78.444,rs7962106,-0.556  
12,78.492,rs10506439,-0.574  
12,78.578,rs11174935,-0.579  
12,78.621,rs498768,-0.581  
12,78.686,rs11174965,-0.608  
12,78.997,rs3936640,-0.605  
12,79.249,rs4346062,-0.596  
12,79.284,rs2335882,-0.609  
12,79.322,rs1989584,-0.568  
12,79.326,rs10784374,-0.569  
12,79.328,rs17099949,-0.570  
12,79.372,rs7300256,-0.597  
12,79.455,rs6581527,-0.591  
12,79.693,rs2643665,-0.617  
12,79.888,rs12308116,-0.537  
12,79.889,rs7133188,-0.537  
12,80.037,rs7309367,-0.550  
12,80.098,rs11175398,-0.571  
12,80.201,rs2141765,-0.517  
12,80.217,rs4964110,-0.519  
12,80.293,rs1617260,-0.542  
12,80.444,rs508792,-0.454  
12,80.525,rs1269547,-0.421  
12,80.730,rs3741742,-0.315  
12,80.793,rs464817,-0.304  
12,80.831,rs7300655,-0.292  
12,80.844,rs4044903,-0.288  
12,80.921,rs11175623,-0.255  
12,80.991,rs1446527,-0.227  
12,81.033,rs7299766,-0.253  
12,81.336,rs10506528,-0.253  
12,81.443,rs17101291,-0.276  
12,81.561,rs4762096,-0.270

12,81.664,rs11175794,-0.277  
12,81.735,rs4237904,-0.353  
12,81.918,rs10784490,-0.313  
12,81.956,rs11175906,-0.329  
12,81.959,rs17225611,-0.331  
12,81.976,rs10784496,-0.339  
12,82.188,rs11175947,-0.234  
12,82.312,rs1480468,-0.228  
12,82.434,rs899844,-0.237  
12,82.478,rs17767008,-0.232  
12,82.581,rs11836463,-0.219  
12,82.612,rs10735933,-0.218  
12,82.678,rs17102070,-0.220  
12,82.812,rs1185629,-0.224  
12,82.844,rs8793,-0.225  
12,83.038,rs17826057,-0.231  
12,83.040,rs1152912,-0.231  
12,83.048,rs3782348,-0.232  
12,83.067,rs7972963,-0.229  
12,83.127,rs12579472,-0.216  
12,83.411,rs873908,-0.247  
12,83.471,rs6581696,-0.252  
12,83.526,rs7959694,-0.255  
12,83.544,rs11176204,-0.258  
12,83.609,rs12312548,-0.261  
12,83.662,rs7955946,-0.262  
12,83.663,rs7138741,-0.262  
12,83.664,rs12312692,-0.262  
12,83.729,rs7134781,-0.263  
12,83.840,rs1493481,-0.263  
12,83.931,rs11176353,-0.261  
12,83.932,rs4540902,-0.261  
12,83.951,rs10878485,-0.259  
12,83.953,rs1982664,-0.259  
12,83.969,rs17102790,-0.252  
12,84.003,rs6581712,-0.240  
12,84.036,rs4283063,-0.202  
12,84.049,rs11176383,-0.205  
12,84.073,rs1480008,-0.217  
12,84.214,rs7962776,-0.213  
12,84.224,rs12580444,-0.210  
12,84.291,rs975731,-0.194  
12,84.373,rs905697,-0.203  
12,84.375,rs4526844,-0.204  
12,84.380,rs1262101,-0.204  
12,84.386,rs12230530,-0.195  
12,84.389,rs10878536,-0.191  
12,84.397,rs7303407,-0.188  
12,84.405,rs774392,-0.193  
12,84.412,rs11176566,-0.194  
12,84.479,rs2870933,-0.077  
12,84.483,rs1920438,-0.061  
12,84.488,rs11176761,-0.048  
12,84.489,rs10506554,-0.050  
12,84.493,rs2700062,-0.060  
12,84.497,rs2700559,-0.052  
12,84.498,rs11836797,-0.050  
12,84.500,rs2904501,-0.048  
12,84.504,rs1731541,-0.030  
12,84.506,rs2620758,-0.030  
12,84.508,rs1731543,-0.030

12,84.510,rs17104186,-0.028  
12,84.525,rs10784645,-0.019  
12,84.532,rs763948,-0.010  
12,84.539,rs11176874,-0.016  
12,84.540,rs10492203,-0.016  
12,84.676,rs11176925,-0.009  
12,84.775,rs7312407,-0.009  
12,84.909,rs10748093,-0.015  
12,84.989,rs17629076,-0.019  
12,84.998,rs4913395,-0.020  
12,85.103,rs10748101,-0.030  
12,85.111,rs3782553,-0.031  
12,85.123,rs2046068,-0.028  
12,85.131,rs10506557,-0.026  
12,85.153,rs9325187,-0.022  
12,85.154,rs4913436,-0.022  
12,85.156,rs12309517,-0.021  
12,85.161,rs2127536,-0.017  
12,85.166,rs7133383,-0.015  
12,85.178,rs686283,-0.012  
12,85.179,rs378862,-0.012  
12,85.180,rs11177201,-0.006  
12,85.183,rs11177206,-0.002  
12,85.186,rs10878824,-0.002  
12,85.216,rs10878841,-0.001  
12,85.227,rs1442275,-0.001  
12,85.252,rs2468411,-0.001  
12,85.312,rs10784723,-0.002  
12,85.362,rs4913470,-0.001  
12,85.364,rs2120741,-0.001  
12,85.380,rs1565862,-0.001  
12,85.415,rs11836417,-0.001  
12,85.481,rs6581852,-0.006  
12,85.502,rs10784762,-0.004  
12,85.505,rs4075026,-0.001  
12,85.521,rs6581864,-0.001  
12,85.553,rs7488555,-0.001  
12,85.561,rs4761161,-0.001  
12,85.576,rs4761264,-0.003  
12,85.585,rs6581884,-0.004  
12,85.727,rs2168029,-0.001  
12,85.744,rs3825243,-0.001  
12,85.747,rs2306204,-0.001  
12,85.814,rs732214,0.000  
12,85.825,rs10878983,-0.000  
12,85.976,rs547497,-0.001  
12,86.037,rs776207,-0.000  
12,86.051,rs796538,-0.000  
12,86.075,rs7310083,-0.002  
12,86.286,rs1531302,-0.015  
12,86.298,rs1630148,-0.015  
12,86.339,rs1152977,-0.017  
12,86.341,rs1152969,-0.017  
12,86.350,rs2307087,-0.018  
12,86.376,rs710671,-0.019  
12,86.407,rs10879109,-0.016  
12,86.439,rs3817487,-0.015  
12,86.455,rs6581940,-0.015  
12,86.457,rs787931,-0.015  
12,86.460,rs438847,-0.016  
12,86.485,rs2584028,-0.026

12,86.487,rs2567133,-0.024  
12,86.487,rs2116209,-0.023  
12,86.489,rs2717440,-0.015  
12,86.493,rs2717418,-0.015  
12,86.502,rs2439732,-0.010  
12,86.522,rs6581958,-0.014  
12,86.532,rs4760933,-0.018  
12,86.534,rs1513098,-0.017  
12,86.547,rs2048607,-0.031  
12,86.586,rs10784870,-0.052  
12,86.620,rs11178455,-0.057  
12,86.731,rs7310543,-0.052  
12,86.732,rs3924187,-0.052  
12,86.940,rs11178515,-0.026  
12,87.020,rs11178523,-0.021  
12,87.183,rs7316843,-0.004  
12,87.203,rs1872824,-0.003  
12,87.248,rs10784953,-0.003  
12,87.255,rs7316840,-0.004  
12,87.257,rs7485207,-0.003  
12,87.264,rs10879389,-0.001  
12,87.276,rs10784961,-0.000  
12,87.278,rs12811298,0.002  
12,87.335,rs997590,0.000  
12,87.372,rs461075,-0.000  
12,87.376,rs1433251,-0.000  
12,87.394,rs6421235,-0.000  
12,87.396,rs12315196,-0.000  
12,87.406,rs11179361,0.000  
12,87.409,rs7298274,0.000  
12,87.448,rs10784998,-0.000  
12,87.450,rs7963448,-0.000  
12,87.459,rs1516275,-0.000  
12,87.505,rs2176201,-0.003  
12,87.507,rs954967,-0.003  
12,87.640,rs1915297,-0.001  
12,87.808,rs764065,-0.000  
12,88.284,rs7305820,-0.000  
12,88.305,rs12426157,-0.000  
12,89.264,rs1461067,-0.000  
12,89.356,rs2613903,0.000  
12,89.444,rs7314330,0.001  
12,89.456,rs1396162,0.001  
12,89.483,rs17114198,0.001  
12,89.503,rs7298459,0.001  
12,89.559,rs17114354,0.000  
12,89.686,rs1463506,-0.001  
12,89.720,rs735636,-0.002  
12,89.729,rs1463509,-0.000  
12,89.772,rs10735986,0.000  
12,89.898,rs7300308,0.001  
12,89.992,rs15513,0.003  
12,90.284,rs12578478,0.000  
12,90.310,rs11180619,0.001  
12,90.392,rs11180638,0.000  
12,90.470,rs7488278,0.001  
12,90.519,rs1275642,0.003  
12,90.560,rs11180676,0.002  
12,90.634,rs1299468,0.000  
12,90.691,rs11180712,0.000  
12,90.750,rs1623319,0.000

12,90.795,rs11180738,-0.000  
12,90.803,rs11180742,-0.000  
12,90.833,rs2367440,-0.001  
12,90.853,rs1921484,-0.001  
12,90.905,rs1991853,-0.000  
12,90.934,rs11180772,0.000  
12,90.977,rs11831987,0.000  
12,90.984,rs10880020,0.000  
12,91.006,rs2367444,-0.000  
12,91.033,rs7297654,-0.000  
12,91.048,rs7294433,-0.000  
12,91.085,rs7978288,0.000  
12,91.263,rs7958986,0.003  
12,91.369,rs11104268,0.001  
12,91.377,rs17176000,0.001  
12,91.398,rs6538180,0.001  
12,91.793,rs7303892,0.000  
12,91.908,rs2669017,0.000  
12,91.975,rs7965589,-0.001  
12,91.995,rs7953372,-0.001  
12,92.001,rs12309141,-0.002  
12,92.033,rs974467,-0.002  
12,92.095,rs10862509,-0.000  
12,92.141,rs11115613,-0.000  
12,92.237,rs10862789,0.000  
12,92.321,rs7316241,0.002  
12,92.373,rs310886,0.001  
12,92.404,rs10746338,0.002  
12,92.425,rs431951,0.004  
12,92.427,rs2242383,0.004  
12,92.431,rs310802,0.004  
12,92.581,rs1391707,0.003  
12,92.626,rs11104156,0.003  
12,92.684,rs4761363,0.003  
12,92.796,rs1607784,0.003  
12,92.817,rs6538140,0.003  
12,92.839,rs10858749,0.003  
12,92.885,rs1465070,0.003  
12,92.889,rs10506742,0.003  
12,92.916,rs798396,0.003  
12,92.930,rs10506744,0.003  
12,93.138,rs7111105,0.001  
12,93.217,rs1725872,0.002  
12,93.218,rs11106131,0.002  
12,93.334,rs7487814,0.004  
12,93.391,rs7301579,0.005  
12,93.445,rs11106871,0.005  
12,93.488,rs1526905,0.006  
12,93.535,rs2619062,0.012  
12,93.620,rs17044607,0.019  
12,93.629,rs1261724,0.019  
12,93.631,rs17044634,0.019  
12,93.689,rs1731760,0.023  
12,93.755,rs17044832,0.022  
12,93.827,rs2694682,0.018  
12,93.848,rs11833552,0.019  
12,93.871,rs392773,0.019  
12,93.903,rs1020461,0.022  
12,93.906,rs300525,0.022  
12,93.927,rs17044997,0.022  
12,93.943,rs300493,0.022

12,93.997,rs952367,0.030  
12,94.019,rs1358274,0.032  
12,94.248,rs11109799,0.033  
12,94.248,rs1449460,0.033  
12,94.258,rs1036049,0.033  
12,94.280,rs733694,0.032  
12,94.526,rs1922660,0.018  
12,94.536,rs1521372,0.019  
12,94.724,rs4842407,0.024  
12,94.793,rs10778258,0.028  
12,94.874,rs1037996,0.039  
12,94.912,rs17046094,0.039  
12,94.980,rs1514920,0.039  
12,95.094,rs2950386,0.041  
12,95.235,rs6539284,0.043  
12,95.414,rs3849228,0.044  
12,95.454,rs1245775,0.058  
12,95.700,rs2463107,0.049  
12,95.712,rs6539525,0.063  
12,95.717,rs1358476,0.063  
12,95.796,rs9668261,0.085  
12,95.805,rs17007015,0.087  
12,95.822,rs1178704,0.089  
12,95.921,rs1163263,0.105  
12,96.117,rs10862207,0.141  
12,96.400,rs5027920,0.134  
12,96.413,rs7967650,0.134  
12,96.538,rs1921038,0.137  
12,96.560,rs1921057,0.137  
12,96.620,rs10862288,0.139  
12,96.768,rs1000933,0.143  
12,96.857,rs12814460,0.142  
12,96.976,rs2178686,0.160  
12,97.083,rs1344016,0.156  
12,97.224,rs6539598,0.185  
12,97.298,rs1529760,0.193  
12,97.338,rs12314791,0.197  
12,97.394,rs7295078,0.200  
12,97.411,rs3935340,0.192  
12,97.419,rs4842423,0.210  
12,97.463,rs7132518,0.198  
12,97.554,rs4561274,0.211  
12,97.678,rs7307305,0.235  
12,97.775,rs4620789,0.238  
12,97.795,rs11115376,0.241  
12,97.815,rs10862504,0.242  
12,97.854,rs11115451,0.254  
12,97.876,rs7295124,0.260  
12,97.907,rs1796209,0.268  
12,97.920,rs11115493,0.273  
12,98.032,rs10431415,0.270  
12,98.051,rs1543169,0.305  
12,98.060,rs7297393,0.297  
12,98.068,rs4882436,0.310  
12,98.085,rs10862975,0.360  
12,98.145,rs9943770,0.372  
12,98.162,rs7316875,0.372  
12,98.169,rs765365,0.372  
12,98.500,rs7960313,0.378  
12,98.570,rs1026085,0.376  
12,98.972,rs6538046,0.369



12,99.035,rs10492296,0.361  
12,99.110,rs2897395,0.353  
12,99.255,rs11104365,0.402  
12,99.271,rs11104397,0.417  
12,99.309,rs9971641,0.452  
12,99.362,rs1603406,0.456  
12,99.475,rs10858638,0.414  
12,99.509,rs1381138,0.382  
12,99.509,rs1381143,0.382  
12,99.578,rs11104736,0.316  
12,99.620,rs7302806,0.276  
12,99.665,rs4842610,0.235  
12,99.785,rs10506959,0.165  
12,99.895,rs11609946,0.131  
12,99.968,rs12311684,0.124  
12,99.980,rs11611632,0.123  
12,100.006,rs11105165,0.128  
12,100.027,rs7312093,0.134  
12,100.055,rs10161332,0.146  
12,100.125,rs979405,0.180  
12,100.194,rs796041,0.192  
12,100.232,rs2638470,0.188  
12,100.258,rs796038,0.187  
12,100.338,rs704061,0.250  
12,100.363,rs1689419,0.254  
12,100.389,rs770374,0.226  
12,100.497,rs2230283,0.227  
12,100.645,rs10858915,0.192  
12,100.687,rs10777190,0.199  
12,100.706,rs11105381,0.201  
12,100.730,rs1405780,0.205  
12,100.763,rs11105404,0.202  
12,100.802,rs1401985,0.199  
12,100.913,rs4635138,0.184  
12,101.107,rs7488228,0.160  
12,101.210,rs10506981,0.172  
12,101.221,rs934891,0.173  
12,101.423,rs10858976,0.213  
12,101.682,rs2051713,0.209  
12,101.736,rs763564,0.223  
12,101.760,rs11503340,0.225  
12,101.811,rs10859030,0.240  
12,101.883,rs7954238,0.247  
12,101.917,rs1354421,0.245  
12,101.944,rs6538248,0.218  
12,102.048,rs4272843,0.215  
12,102.053,rs10859077,0.215  
12,102.537,rs10859110,0.220  
12,103.007,rs1492917,0.243  
12,103.029,rs1389058,0.244  
12,103.043,rs11106114,0.245  
12,103.073,rs4842763,0.245  
12,103.075,rs1492945,0.245  
12,103.124,rs7966281,0.244  
12,103.166,rs12318659,0.244  
12,103.250,rs4399376,0.259  
12,103.267,rs17041033,0.263  
12,103.325,rs6538288,0.279  
12,103.332,rs1389478,0.281  
12,103.423,rs10777331,0.360  
12,103.452,rs7960822,0.373

12,103.555,rs4240750,0.453  
12,103.623,rs10859259,0.439  
12,103.630,rs4842814,0.437  
12,103.649,rs4567507,0.432  
12,103.671,rs7959206,0.436  
12,103.696,rs7132875,0.434  
12,103.749,rs2279577,0.447  
12,103.774,rs709220,0.475  
12,103.810,rs1658693,0.464  
12,103.858,rs790455,0.476  
12,103.888,rs12316546,0.455  
12,103.911,rs7968929,0.440  
12,103.924,rs337656,0.429  
12,103.936,rs11106496,0.429  
12,104.000,rs397324,0.429  
12,104.113,rs4760440,0.448  
12,104.171,rs12300203,0.500  
12,104.210,rs791223,0.534  
12,104.215,rs2385087,0.536  
12,104.273,rs2013116,0.567  
12,104.298,rs7306076,0.574  
12,104.362,rs1385060,0.591  
12,104.546,rs10859354,0.595  
12,104.691,rs2036553,0.610  
12,105.049,rs4760506,0.670  
12,105.084,rs6538367,0.673  
12,105.164,rs17020888,0.681  
12,105.202,rs10745626,0.685  
12,105.211,rs9788200,0.685  
12,105.281,rs10859423,0.695  
12,105.321,rs7972610,0.719  
12,105.349,rs7316595,0.737  
12,105.358,rs6538386,0.733  
12,105.407,rs7303148,0.699  
12,105.426,rs12300704,0.684  
12,105.450,rs975523,0.664  
12,105.526,rs10777483,0.603  
12,105.574,rs747098,0.582  
12,105.647,rs11106937,0.586  
12,105.708,rs930248,0.557  
12,105.725,rs7295103,0.554  
12,105.852,rs11107008,0.535  
12,105.856,rs7487813,0.534  
12,105.939,rs1483003,0.519  
12,106.099,rs10859513,0.530  
12,106.186,rs10745657,0.496  
12,106.287,rs11830104,0.380  
12,106.515,rs903173,0.310  
12,106.549,rs17837165,0.311  
12,106.556,rs10859584,0.312  
12,106.593,rs10859589,0.314  
12,106.609,rs12817202,0.318  
12,106.646,rs3858605,0.319  
12,106.658,rs10859598,0.320  
12,106.733,rs11614624,0.345  
12,106.792,rs10777557,0.367  
12,106.819,rs1946663,0.370  
12,106.893,rs7313703,0.375  
12,106.988,rs11107336,0.386  
12,106.993,rs4761547,0.386  
12,107.039,rs1036361,0.358

12,107.070,rs1434721,0.362  
12,107.105,rs10859660,0.368  
12,107.137,rs12298828,0.389  
12,107.154,rs6538484,0.400  
12,107.170,rs12099801,0.406  
12,107.179,rs11613298,0.408  
12,107.252,rs4761590,0.427  
12,107.261,rs3847809,0.439  
12,107.318,rs7298918,0.479  
12,107.338,rs12099862,0.480  
12,107.344,rs9943825,0.481  
12,107.370,rs870034,0.482  
12,107.375,rs2054724,0.482  
12,107.509,rs7979054,0.520  
12,107.811,rs7968386,0.582  
12,107.814,rs4761479,0.584  
12,107.832,rs11835904,0.591  
12,107.926,rs10859731,0.512  
12,107.930,rs17022749,0.511  
12,107.933,rs1316366,0.511  
12,107.944,rs17022770,0.512  
12,107.967,rs3747552,0.518  
12,108.001,rs4761650,0.569  
12,108.017,rs11107665,0.529  
12,108.019,rs11107669,0.524  
12,108.024,rs1316566,0.510  
12,108.027,rs7350629,0.501  
12,108.033,rs7963894,0.487  
12,108.042,rs3810784,0.465  
12,108.078,rs7308671,0.450  
12,108.106,rs6538556,0.429  
12,108.116,rs10507045,0.421  
12,108.165,rs17023454,0.430  
12,108.180,rs249189,0.437  
12,108.188,rs933900,0.440  
12,108.205,rs10859814,0.447  
12,108.213,rs17023557,0.454  
12,108.219,rs17321986,0.466  
12,108.251,rs11107875,0.509  
12,108.347,rs1436125,0.639  
12,108.367,rs11610070,0.604  
12,108.409,rs4762254,0.688  
12,108.436,rs4762643,0.691  
12,108.506,rs2300560,0.712  
12,108.522,rs11108368,0.761  
12,108.614,rs11108385,0.711  
12,108.625,rs7314867,0.704  
12,108.635,rs10860001,0.696  
12,108.656,rs4762661,0.664  
12,108.696,rs2540457,0.629  
12,108.721,rs11108403,0.607  
12,108.797,rs1861296,0.560  
12,108.808,rs34580,0.553  
12,108.829,rs34583,0.556  
12,108.841,rs34585,0.546  
12,108.844,rs256178,0.543  
12,108.879,rs10492224,0.515  
12,109.026,rs11835157,0.529  
12,109.027,rs2300552,0.529  
12,109.053,rs4762291,0.535  
12,109.367,rs11832122,0.601

12,109.388,rs1902753,0.605  
12,109.406,rs7957408,0.604  
12,109.694,rs1420617,0.511  
12,109.820,rs815911,0.486  
12,109.987,rs12581358,0.478  
12,110.054,rs11612412,0.475  
12,110.085,rs6538763,0.474  
12,110.152,rs995428,0.472  
12,110.186,rs983679,0.470  
12,110.266,rs10860152,0.458  
12,110.291,rs17026523,0.459  
12,110.365,rs10745787,0.464  
12,110.500,rs2216144,0.499  
12,110.549,rs10777847,0.492  
12,110.602,rs11108974,0.568  
12,110.676,rs12424969,0.550  
12,110.695,rs1861373,0.545  
12,110.697,rs1078709,0.550  
12,110.719,rs7298683,0.598  
12,110.731,rs10777859,0.624  
12,110.736,rs10507086,0.628  
12,110.756,rs10745796,0.630  
12,110.758,rs12321566,0.630  
12,110.804,rs10777864,0.718  
12,110.815,rs7963662,0.716  
12,110.841,rs12579455,0.711  
12,110.913,rs1993067,0.680  
12,110.937,rs11109114,0.675  
12,110.984,rs10860227,0.619  
12,111.057,rs12422443,0.595  
12,111.066,rs17027332,0.598  
12,111.138,rs40420,0.619  
12,111.140,rs1345364,0.619  
12,111.236,rs10444526,0.592  
12,111.377,rs2216022,0.601  
12,111.392,rs2011247,0.603  
12,111.431,rs6538846,0.624  
12,111.459,rs1531650,0.564  
12,111.465,rs7132475,0.559  
12,111.495,rs17027943,0.574  
12,111.540,rs1480082,0.574  
12,111.626,rs7134104,0.601  
12,111.654,rs10492291,0.612  
12,111.670,rs249833,0.604  
12,111.795,rs7964472,0.599  
12,111.959,rs201430,0.582  
12,111.961,rs201421,0.582  
12,111.964,rs169296,0.581  
12,111.967,rs200788,0.581  
12,111.969,rs1549102,0.589  
12,111.975,rs483610,0.609  
12,112.076,rs2638559,0.600  
12,112.105,rs2201161,0.592  
12,112.121,rs7954551,0.594  
12,112.128,rs2131163,0.595  
12,112.150,rs10860416,0.598  
12,112.215,rs4341626,0.620  
12,112.359,rs809794,0.528  
12,112.371,rs1039378,0.526  
12,112.615,rs7965793,0.484  
12,112.792,rs11110099,0.476

12,113.049,rs10778038,0.447  
12,113.543,rs12314464,0.396  
12,113.589,rs7311096,0.382  
12,113.615,rs1887276,0.432  
12,113.619,rs10860589,0.433  
12,113.638,rs2209702,0.432  
12,113.706,rs4764980,0.428  
12,113.719,rs7960489,0.425  
12,113.759,rs11110415,0.412  
12,113.802,rs35697,0.398  
12,113.844,rs1045603,0.375  
12,113.928,rs10778062,0.328  
12,113.930,rs10860622,0.327  
12,113.996,rs7957624,0.312  
12,114.027,rs10778077,0.305  
12,114.046,rs17401978,0.301  
12,114.050,rs10860638,0.301  
12,114.063,rs4764755,0.301  
12,114.096,rs938335,0.296  
12,114.118,rs10860654,0.292  
12,114.145,rs12312569,0.288  
12,114.198,rs7974164,0.279  
12,114.216,rs609728,0.280  
12,114.227,rs2673665,0.281  
12,114.234,rs11110622,0.281  
12,114.240,rs12298243,0.281  
12,114.336,rs7295262,0.275  
12,114.560,rs189488,0.249  
12,114.603,rs2712623,0.272  
12,114.607,rs1631980,0.272  
12,114.778,rs6538980,0.267  
12,114.957,rs11610301,0.251  
12,115.057,rs7967809,0.221  
12,115.069,rs11609579,0.221  
12,115.096,rs17416059,0.224  
12,115.126,rs17031482,0.223  
12,115.151,rs1566556,0.214  
12,115.162,rs950792,0.210  
12,115.179,rs7304176,0.216  
12,115.226,rs1405712,0.189  
12,115.282,rs825055,0.192  
12,115.284,rs844066,0.192  
12,115.335,rs6539009,0.211  
12,115.597,rs10860822,0.225  
12,115.604,rs7964241,0.224  
12,115.610,rs2888604,0.202  
12,115.639,rs9332443,0.218  
12,115.659,rs10745935,0.215  
12,115.884,rs10860845,0.221  
12,115.959,rs12305296,0.214  
12,116.282,rs11111293,0.210  
12,116.318,rs35760,0.210  
12,116.472,rs7309412,0.212  
12,116.473,rs10860901,0.212  
12,116.514,rs10507149,0.207  
12,116.541,rs7980567,0.205  
12,116.555,rs2172873,0.184  
12,116.567,rs879434,0.192  
12,116.608,rs11612372,0.232  
12,116.621,rs1722402,0.246  
12,116.689,rs1464789,0.231

12,116.743,rs1722383,0.194  
12,116.910,rs9782,0.243  
12,116.920,rs1353769,0.246  
12,116.925,rs17450273,0.246  
12,117.135,rs10778213,0.300  
12,117.242,rs7963232,0.309  
12,117.320,rs11111501,0.260  
12,117.331,rs17034439,0.234  
12,117.334,rs11111738,0.226  
12,117.336,rs1946821,0.226  
12,117.337,rs4981030,0.242  
12,117.338,rs17505525,0.251  
12,117.343,rs4981029,0.296  
12,117.356,rs2056128,0.292  
12,117.412,rs17034524,0.337  
12,117.423,rs7296900,0.341  
12,117.513,rs4964571,0.372  
12,117.621,rs7295268,0.374  
12,117.722,rs1165692,0.333  
12,117.787,rs1866074,0.330  
12,117.852,rs17035120,0.333  
12,118.036,rs10861159,0.343  
12,118.163,rs4255604,0.346  
12,118.246,rs10861171,0.346  
12,118.735,rs6539151,0.348  
12,118.755,rs12302097,0.347  
12,118.759,rs2468905,0.347  
12,118.774,rs11112046,0.346  
12,118.863,rs7958327,0.365  
12,118.872,rs7976582,0.367  
12,118.912,rs10778335,0.484  
12,118.918,rs10746001,0.490  
12,119.006,rs7137398,0.481  
12,119.184,rs7980528,0.445  
12,119.186,rs17812685,0.446  
12,119.280,rs2665742,0.435  
12,119.285,rs167510,0.451  
12,119.293,rs7298728,0.472  
12,119.486,rs2696004,0.404  
12,119.495,rs12581164,0.405  
12,119.500,rs2559639,0.406  
12,119.564,rs835487,0.405  
12,119.590,rs703669,0.372  
12,119.650,rs312145,0.350  
12,119.689,rs835495,0.305  
12,119.690,rs2081807,0.311  
12,119.691,rs10861271,0.315  
12,119.705,rs7314687,0.260  
12,119.707,rs2280685,0.252  
12,119.726,rs2029737,0.241  
12,119.762,rs312154,0.271  
12,120.211,rs10861282,0.266  
12,120.721,rs11112315,0.286  
12,121.221,rs1196865,0.302  
12,121.365,rs11112511,0.302  
12,121.367,rs4964364,0.301  
12,121.377,rs1432589,0.296  
12,121.391,rs1347100,0.318  
12,121.400,rs17037213,0.313  
12,121.403,rs2177938,0.313  
12,121.430,rs10861453,0.309

12,121.445,rs3915229,0.314  
12,121.455,rs2374514,0.320  
12,121.482,rs4590981,0.335  
12,121.488,rs7134108,0.338  
12,121.495,rs2888865,0.329  
12,121.503,rs10507198,0.312  
12,121.522,rs7960156,0.314  
12,121.527,rs10861501,0.334  
12,121.528,rs1806477,0.338  
12,121.590,rs1345551,0.340  
12,121.617,rs1421438,0.348  
12,121.666,rs1421444,0.377  
12,121.735,rs7299479,0.439  
12,121.744,rs2111978,0.446  
12,121.751,rs1862026,0.448  
12,121.829,rs2468197,0.420  
12,121.913,rs1148427,0.373  
12,122.031,rs7959575,0.451  
12,122.032,rs10459209,0.502  
12,122.033,rs1215761,0.521  
12,122.034,rs1148416,0.521  
12,122.078,rs1148409,0.515  
12,122.216,rs2264759,0.456  
12,122.351,rs6539274,0.424  
12,122.399,rs13378019,0.443  
12,122.419,rs10778494,0.451  
12,122.433,rs969802,0.453  
12,122.877,rs1024855,0.459  
12,123.108,rs11113179,0.491  
12,123.174,rs12315175,0.500  
12,123.183,rs10861709,0.502  
12,123.270,rs2374671,0.477  
12,123.521,rs7965742,0.493  
12,123.594,rs2374689,0.499  
12,123.730,rs12309162,0.473  
12,123.769,rs7958562,0.466  
12,123.826,rs10778548,0.471  
12,123.866,rs10861732,0.473  
12,123.965,rs12422367,0.477  
12,124.165,rs11837333,0.482  
12,124.276,rs7309802,0.473  
12,124.300,rs12322163,0.449  
12,124.320,rs6539357,0.430  
12,124.355,rs3741786,0.431  
12,124.401,rs7968311,0.443  
12,124.493,rs7312873,0.454  
12,124.674,rs11835862,0.414  
12,124.716,rs7302869,0.412  
12,124.748,rs10746112,0.410  
12,124.776,rs10746116,0.438  
12,124.790,rs1344608,0.433  
12,124.843,rs11113776,0.441  
12,124.863,rs9739493,0.411  
12,124.888,rs17041392,0.437  
12,124.897,rs11113808,0.446  
12,124.898,rs1878022,0.447  
12,124.900,rs4964246,0.435  
12,124.903,rs2374985,0.449  
12,124.914,rs952584,0.441  
12,124.936,rs803556,0.431  
12,125.002,rs12425076,0.436

12,125.015,rs2160974,0.442  
12,125.025,rs10778642,0.450  
12,125.070,rs10861946,0.476  
12,125.076,rs10861950,0.475  
12,125.105,rs3782522,0.483  
12,125.147,rs10746129,0.493  
12,125.267,rs2111902,0.467  
12,125.287,rs10861980,0.441  
12,125.296,rs7313861,0.473  
12,125.419,rs10774961,0.525  
12,125.420,rs16939904,0.523  
12,125.441,rs34263,0.493  
12,125.492,rs4300440,0.427  
12,125.496,rs2284691,0.428  
12,125.498,rs2268389,0.427  
12,125.511,rs4766584,0.433  
12,125.519,rs2241220,0.437  
12,125.546,rs10774641,0.475  
12,125.551,rs7959782,0.480  
12,125.586,rs10850058,0.515  
12,125.764,rs11615462,0.361  
12,125.785,rs714880,0.341  
12,125.795,rs12305576,0.302  
12,125.813,rs11067915,0.289  
12,125.870,rs10735104,0.247  
12,125.903,rs6606743,0.206  
12,126.405,rs7956133,0.194  
12,127.034,rs11065774,0.178  
12,127.078,rs6489844,0.176  
12,127.588,rs11065854,0.160  
12,129.191,rs11611847,0.118  
12,129.482,rs1362036,0.104  
12,129.871,rs233722,0.087  
12,129.974,rs232921,0.085  
12,130.003,rs7314882,0.083  
12,130.187,rs10850078,0.087  
12,130.197,rs3803061,0.085  
12,130.283,rs7309495,0.066  
12,130.410,rs12177,0.109  
12,130.434,rs3741981,0.113  
12,130.608,rs916973,0.162  
12,130.628,rs10492029,0.165  
12,130.737,rs1732803,0.180  
12,130.796,rs1284879,0.173  
12,130.841,rs1284883,0.183  
12,130.999,rs2098922,0.195  
12,131.057,rs1863534,0.173  
12,131.172,rs739,0.145  
12,131.337,rs11066637,0.133  
12,131.484,rs249047,0.112  
12,131.572,rs641021,0.087  
12,131.575,rs606364,0.086  
12,131.590,rs10744800,0.080  
12,131.617,rs741628,0.072  
12,131.639,rs12423428,0.065  
12,131.651,rs16943226,0.054  
12,131.661,rs4767133,0.032  
12,131.675,rs964401,0.031  
12,131.736,rs3782458,0.029  
12,131.744,rs11066827,0.029  
12,131.766,rs16943516,0.030



12,131.778,rs1350524,0.030  
12,131.802,rs12313095,0.030  
12,131.808,rs1458705,0.030  
12,131.811,rs7307803,0.030  
12,131.865,rs768257,0.028  
12,132.137,rs1920584,0.024  
12,132.146,rs741637,0.023  
12,132.194,rs964499,0.022  
12,132.258,rs1920563,0.020  
12,132.275,rs1265496,0.020  
12,132.310,rs1882115,0.016  
12,132.319,rs10507243,0.016  
12,132.361,rs1896003,0.017  
12,132.454,rs10850330,0.018  
12,132.460,rs7137598,0.018  
12,132.468,rs4113925,0.011  
12,132.472,rs2551394,0.013  
12,132.478,rs10850336,0.016  
12,132.494,rs1895602,0.026  
12,132.503,rs2113436,0.032  
12,132.557,rs16944288,0.041  
12,132.569,rs1522361,0.042  
12,132.720,rs1427762,0.033  
12,132.780,rs997821,0.020  
12,132.839,rs12581328,0.014  
12,132.845,rs4073170,0.014  
12,132.913,rs6489968,0.018  
12,132.981,rs10744833,0.022  
12,132.984,rs10850375,0.023  
12,133.031,rs16944632,0.029  
12,133.063,rs10774771,0.033  
12,133.074,rs3923317,0.034  
12,133.124,rs7137643,0.039  
12,133.155,rs7301908,0.040  
12,133.184,rs7967062,0.040  
12,133.249,rs1896350,0.044  
12,133.299,rs1317715,0.036  
12,133.307,rs7310469,0.038  
12,133.326,rs11067363,0.038  
12,133.334,rs10850426,0.038  
12,133.342,rs7957465,0.037  
12,133.361,rs7972261,0.037  
12,133.379,rs35516,0.033  
12,133.407,rs1834608,0.030  
12,133.461,rs35458,0.029  
12,133.484,rs35444,0.027  
12,133.488,rs12820517,0.028  
12,133.506,rs11067430,0.034  
12,133.512,rs10492264,0.036  
12,133.516,rs1828384,0.040  
12,133.534,rs254692,0.063  
12,133.541,rs35372,0.069  
12,133.568,rs35341,0.094  
12,133.703,rs1732598,0.091  
12,133.778,rs10774805,0.100  
12,133.799,rs2141693,0.101  
12,133.816,rs16945435,0.102  
12,133.855,rs10507259,0.105  
12,133.881,rs2464266,0.091  
12,133.885,rs10507260,0.090  
12,133.976,rs10507262,0.088

12,134.004,rs4767329,0.087  
12,134.026,rs11067633,0.088  
12,134.037,rs11067643,0.089  
12,134.041,rs7311298,0.090  
12,134.126,rs7974562,0.097  
12,134.198,rs1965295,0.094  
12,134.262,rs12322455,0.091  
12,134.276,rs2035587,0.092  
12,134.439,rs11067753,0.084  
12,134.446,rs1084062,0.081  
12,134.461,rs780876,0.066  
12,134.513,rs780881,0.083  
12,134.540,rs17719439,0.085  
12,134.595,rs1647105,0.085  
12,134.601,rs1520177,0.084  
12,134.743,rs1861870,0.068  
12,134.818,rs697877,0.059  
12,134.965,rs11067825,0.073  
12,135.096,rs17497950,0.084  
12,135.105,rs7953197,0.085  
12,136.280,rs11615846,0.089  
12,136.321,rs10850601,0.086  
12,136.355,rs7295770,0.086  
12,136.356,rs17499173,0.086  
12,136.416,rs7972837,0.091  
12,136.428,rs6490057,0.096  
12,136.464,rs1567910,0.105  
12,136.524,rs2393042,0.096  
12,136.533,rs6490059,0.094  
12,136.554,rs1151899,0.096  
12,136.651,rs17615178,0.102  
12,136.759,rs2253009,0.110  
12,136.791,rs11610927,0.110  
12,137.049,rs11068058,0.073  
12,137.064,rs4767420,0.069  
12,137.195,rs4766796,0.040  
12,137.248,rs12307600,0.044  
12,137.276,rs7314617,0.046  
12,137.348,rs2077158,0.040  
12,137.394,rs1011493,0.056  
12,137.408,rs10850694,0.049  
12,137.422,rs1009981,0.050  
12,137.487,rs339460,0.055  
12,137.581,rs2088236,0.066  
12,137.831,rs4766819,0.089  
12,137.857,rs11068282,0.092  
12,137.898,rs4529958,0.098  
12,137.900,rs1051879,0.098  
12,137.911,rs1875144,0.099  
12,137.975,rs12371268,0.103  
12,137.996,rs10850759,0.099  
12,138.002,rs10850760,0.098  
12,138.029,rs6490111,0.096  
12,138.032,rs957363,0.096  
12,138.077,rs816353,0.077  
12,138.147,rs545654,0.056  
12,138.167,rs11068458,0.057  
12,138.188,rs10850820,0.055  
12,138.232,rs7306852,0.063  
12,138.233,rs816284,0.062  
12,138.260,rs1093309,0.060

12,138.262,rs1093305,0.060  
12,138.359,rs708855,0.069  
12,138.365,rs1004361,0.069  
12,138.389,rs816183,0.067  
12,138.409,rs816204,0.065  
12,138.421,rs10774935,0.051  
12,138.600,rs11609285,0.029  
12,138.706,rs487894,0.011  
12,138.766,rs634264,0.006  
12,138.781,rs500037,0.005  
12,138.846,rs975666,0.000  
12,138.885,rs479810,0.000  
12,138.933,rs11068674,0.001  
12,138.952,rs631531,0.001  
12,138.983,rs7972142,0.000  
12,139.157,rs2723279,-0.000  
12,139.166,rs2466453,-0.000  
12,139.201,rs2570560,-0.000  
12,139.240,rs7302809,-0.003  
12,139.386,rs10444502,-0.001  
12,139.462,rs2393333,-0.000  
12,139.505,rs4247308,-0.001  
12,139.605,rs7295696,-0.001  
12,139.719,rs10638,-0.006  
12,139.805,rs8239,-0.013  
12,139.841,rs11068807,-0.014  
12,139.850,rs7957463,-0.014  
12,139.979,rs10466937,-0.015  
12,140.330,rs5711113,-0.018  
12,140.368,rs12316703,-0.020  
12,140.407,rs1503767,-0.015  
12,140.410,rs11613092,-0.015  
12,140.413,rs7299095,-0.016  
12,140.423,rs10850973,-0.016  
12,140.484,rs10850993,-0.021  
12,140.499,rs1520782,-0.023  
12,140.511,rs1879401,-0.024  
12,140.572,rs7958091,-0.027  
12,140.595,rs10851011,-0.028  
12,140.630,rs2730751,-0.029  
12,140.674,rs716330,-0.037  
12,140.713,rs2698089,-0.032  
12,140.723,rs1948694,-0.029  
12,140.738,rs1534618,-0.028  
12,140.786,rs2204498,-0.030  
12,140.827,rs4767750,-0.024  
12,140.851,rs1405050,-0.020  
12,140.909,rs10774484,-0.014  
12,140.943,rs11064669,-0.004  
12,140.944,rs11064670,-0.004  
12,140.948,rs6490237,-0.002  
12,140.955,rs4767788,-0.003  
12,140.956,rs11064681,-0.003  
12,140.961,rs7134341,-0.003  
12,140.999,rs6490244,-0.000  
12,141.011,rs7294866,-0.000  
12,141.019,rs2555296,-0.000  
12,141.024,rs2555298,-0.000  
12,141.042,rs2555283,-0.000  
12,141.048,rs2727671,-0.000  
12,141.055,rs7296226,-0.000

12,141.066,rs2555253,-0.000  
12,141.083,rs2727733,-0.000  
12,141.096,rs3999618,0.000  
12,141.108,rs7977005,-0.000  
12,141.131,rs4453294,-0.001  
12,141.135,rs4465416,-0.001  
12,141.154,rs2519543,-0.000  
12,141.161,rs708881,0.000  
12,141.173,rs812512,0.000  
12,141.177,rs2711746,0.000  
12,141.182,rs11064838,0.000  
12,141.256,rs4766950,0.001  
12,141.261,rs11064935,0.001  
12,141.292,rs2393569,0.000  
12,141.324,rs11065014,0.000  
12,141.344,rs3932409,0.000  
12,141.399,rs2522137,-0.000  
12,141.418,rs206956,-0.002  
12,141.442,rs580016,-0.005  
12,141.448,rs3742049,-0.005  
12,141.473,rs7973823,-0.005  
12,141.495,rs11065208,-0.005  
12,141.500,rs7976497,-0.005  
12,141.546,rs11065299,-0.003  
12,141.577,rs10774579,-0.002  
12,141.593,rs2708081,-0.002  
12,141.597,rs10849832,-0.002  
12,141.637,rs1718119,-0.002  
12,141.648,rs1169727,-0.001  
12,141.660,rs2686346,-0.001  
12,141.661,rs7314454,-0.001  
12,141.665,rs11615578,-0.001  
12,141.668,rs11609701,-0.001  
12,141.677,rs2942067,-0.001  
12,141.696,rs7979163,-0.002  
12,141.703,rs7296507,-0.002  
12,141.725,rs7955747,-0.002  
12,141.731,rs7313015,-0.001  
12,141.799,rs10840615,0.002  
12,141.801,rs11043196,0.002  
12,141.814,rs1795964,0.002  
12,141.831,rs7137218,0.003  
12,141.836,rs7961894,0.003  
12,141.899,rs11611988,0.002  
12,141.945,rs4758695,0.009  
12,141.993,rs7979863,0.007  
12,142.015,rs10847446,0.006  
12,142.406,rs12255,0.009  
12,142.576,rs7953894,0.010  
12,143.627,rs10846489,0.018  
12,143.803,rs10773007,0.020  
12,145.413,rs4930730,0.063  
12,145.455,rs7960854,0.038  
12,145.470,rs7315108,0.037  
12,145.612,rs10744163,0.029  
12,146.246,rs825476,0.026  
12,146.534,rs1027569,0.018  
12,146.548,rs4765078,0.018  
12,146.581,rs4635174,0.018  
12,146.785,rs4514520,0.015  
12,146.834,rs4765477,0.017

12,146.860,rs10846635,0.018  
12,147.182,rs2272368,0.017  
12,147.288,rs2271139,0.016  
12,147.311,rs1268892,0.019  
12,147.381,rs7953329,0.028  
12,147.429,rs881290,0.036  
12,147.464,rs2293514,0.039  
12,147.529,rs1702339,0.044  
12,147.660,rs1812730,0.054  
12,147.831,rs3759106,0.069  
12,147.843,rs1110904,0.070  
12,147.915,rs837948,0.070  
12,147.922,rs701039,0.072  
12,147.936,rs837492,0.075  
12,147.946,rs837466,0.075  
12,148.196,rs837493,0.086  
12,148.254,rs11057704,0.085  
12,148.255,rs10773097,0.085  
12,148.265,rs937341,0.086  
12,148.268,rs12308345,0.086  
12,148.323,rs701073,0.084  
12,148.342,rs11057712,0.068  
12,148.563,rs701090,0.065  
12,148.648,rs838930,0.068  
12,148.656,rs838925,0.067  
12,148.765,rs838916,0.066  
12,148.787,rs838878,0.067  
12,148.836,rs10773105,0.061  
12,148.857,rs838900,0.046  
12,148.906,rs7967521,0.066  
12,148.907,rs12581963,0.066  
12,148.914,rs4765622,0.068  
12,148.946,rs11057864,0.068  
12,149.051,rs4307802,0.065  
12,149.147,rs10744185,0.110  
12,149.151,rs10846782,0.110  
12,149.155,rs4447263,0.110  
12,149.192,rs7350634,0.106  
12,149.224,rs12427062,0.104  
12,149.301,rs11613364,0.110  
12,149.480,rs7307700,0.121  
12,149.558,rs2297476,0.134  
12,149.615,rs10846838,0.143  
12,149.743,rs4765028,0.104  
12,149.780,rs4765029,0.094  
12,149.838,rs326363,0.090  
12,149.845,rs7300278,0.091  
12,149.942,rs748548,0.081  
12,150.182,rs323848,0.070  
12,150.236,rs161714,0.082  
12,150.260,rs422931,0.085  
12,150.271,rs440944,0.085  
12,150.279,rs724346,0.089  
12,150.364,rs1984673,0.076  
12,150.440,rs10846894,0.075  
12,150.497,rs12578940,0.075  
12,150.643,rs7956534,0.070  
12,150.784,rs736438,0.070  
12,151.016,rs10492032,0.056  
12,151.771,rs10846980,0.022  
12,151.885,rs1859943,0.017

12,151.929,rs729632,0.019  
12,151.982,rs7307536,0.015  
12,152.036,rs2345782,0.017  
12,152.088,rs150917,0.008  
12,152.232,rs7960305,0.007  
12,152.265,rs11058406,0.009  
12,152.268,rs10847023,0.009  
12,152.279,rs225563,0.015  
12,152.318,rs225472,0.015  
12,152.326,rs225475,0.019  
12,152.333,rs2346115,0.022  
12,152.373,rs12316769,0.036  
12,152.440,rs11058439,0.041  
12,152.481,rs225495,0.044  
12,152.669,rs12821335,0.043  
12,152.711,rs11058487,0.043  
12,152.816,rs2881341,0.041  
12,152.924,rs2191174,0.038  
12,153.299,rs1160243,0.029  
12,153.523,rs4765344,0.018  
12,153.873,rs2347013,0.021  
12,154.162,rs7296549,0.042  
12,154.239,rs12309343,0.042  
12,154.528,rs975162,0.045  
12,154.540,rs10773298,0.046  
12,154.613,rs10773304,0.051  
12,154.633,rs2058290,0.053  
12,154.896,rs4765428,0.085  
12,155.075,rs4765449,0.127  
12,155.124,rs1194050,0.135  
12,155.144,rs7969727,0.138  
12,155.272,rs11058803,0.134  
12,155.375,rs6489132,0.128  
12,155.528,rs2001789,0.153  
12,155.561,rs1882151,0.134  
12,155.829,rs2078322,0.155  
12,156.077,rs2605469,0.161  
12,156.454,rs2732494,0.131  
12,156.474,rs1990736,0.128  
12,156.529,rs11058920,0.120  
12,156.571,rs1154664,0.114  
12,156.591,rs12425988,0.141  
12,156.630,rs6489145,0.152  
12,156.656,rs12299180,0.153  
12,156.662,rs7308066,0.153  
12,156.708,rs11058949,0.155  
12,157.409,rs2712549,0.157  
12,157.761,rs4765134,0.162  
12,157.788,rs12811986,0.162  
12,158.132,rs3851661,0.134  
12,158.226,rs12422389,0.155  
12,158.306,rs7966946,0.143  
12,158.461,rs906737,0.131  
12,158.866,rs10847328,0.119  
12,159.106,rs7967228,0.119  
12,159.184,rs12821339,0.115  
12,159.220,rs1875949,0.117  
12,159.401,rs1910780,0.114  
12,159.426,rs7313873,0.125  
12,159.499,rs1485862,0.086  
12,159.512,rs3847768,0.098

12,159.516,rs1879390,0.102  
12,159.517,rs4760998,0.102  
12,159.536,rs10744311,0.097  
12,159.546,rs10847350,0.095  
12,159.680,rs2046480,0.101  
12,159.876,rs345643,0.108  
12,159.887,rs4760974,0.105  
12,159.965,rs10444467,0.068  
12,159.982,rs4760979,0.065  
12,160.019,rs4760980,0.061  
12,160.323,rs1873911,0.068  
12,160.356,rs12231982,0.067  
12,160.452,rs1910311,0.045  
12,160.546,rs1490889,0.034  
12,160.828,rs4761009,0.023  
12,160.946,rs7312587,0.024  
12,161.009,rs7962827,0.024  
12,161.435,rs10744327,0.032  
12,161.664,rs1488166,0.031  
12,161.700,rs2250786,0.023  
12,161.712,rs10847502,0.017  
12,161.730,rs11059460,0.014  
12,161.838,rs6489236,0.008  
12,161.844,rs7487570,0.008  
12,161.941,rs10773484,0.009  
12,162.048,rs9795921,0.003  
12,162.208,rs9669797,0.001  
12,162.221,rs10847534,0.001  
12,162.363,rs7962380,0.000  
12,162.413,rs11830497,0.001  
12,162.431,rs7139294,0.000  
12,162.469,rs4882703,-0.000  
12,162.809,rs11059595,-0.004  
12,162.935,rs7135277,-0.006  
12,162.984,rs1193373,-0.007  
12,163.061,rs11059618,-0.011  
12,163.137,rs1872536,-0.019  
12,163.240,rs1872541,-0.023  
12,163.309,rs4882735,-0.031  
12,163.352,rs1193363,-0.034  
12,163.560,rs10847601,-0.022  
12,163.614,rs4882748,-0.024  
12,163.716,rs4882752,-0.027  
12,163.871,rs1683721,-0.022  
12,163.993,rs885186,-0.050  
12,164.000,rs11059688,-0.051  
12,164.059,rs4882764,-0.053  
12,164.253,rs1713614,-0.071  
12,164.283,rs10847627,-0.074  
12,164.407,rs7310152,-0.093  
12,164.522,rs10161384,-0.161  
12,164.583,rs11615025,-0.192  
12,164.720,rs1379782,-0.380  
12,164.736,rs4882789,-0.387  
12,164.757,rs1489418,-0.415  
12,164.810,rs10847654,-0.485  
12,164.913,rs1552580,-0.445  
12,165.064,rs12809589,-0.436  
12,165.177,rs7960753,-0.428  
12,165.309,rs7968958,-0.503  
12,165.363,rs1552574,-0.536

12,165.372,rs4760566,-0.542  
12,165.508,rs7967621,-0.418  
12,165.565,rs7978366,-0.392  
12,165.591,rs10744387,-0.380  
12,165.662,rs4760578,-0.271  
12,165.663,rs1552337,-0.269  
12,165.823,rs10847697,-0.205  
12,165.941,rs10744391,-0.172  
12,165.971,rs7970478,-0.167  
12,166.046,rs11059985,-0.157  
12,166.158,rs7300146,-0.146  
12,166.247,rs12579680,-0.150  
12,166.352,rs11060036,-0.169  
12,166.441,rs651352,-0.190  
12,166.481,rs6486749,-0.181  
12,166.572,rs543533,-0.163  
12,166.623,rs9651791,-0.136  
12,166.627,rs10773589,-0.135  
12,166.679,rs10847746,-0.148  
12,166.699,rs588649,-0.157  
12,166.704,rs10773593,-0.159  
12,166.791,rs875729,-0.229  
12,166.816,rs7303978,-0.242  
12,166.870,rs1386212,-0.251  
12,166.928,rs10847773,-0.259  
12,166.956,rs12423558,-0.263  
12,166.993,rs7972301,-0.261  
12,167.004,rs10744400,-0.260  
12,167.022,rs10847780,-0.263  
12,167.074,rs4964869,-0.273  
12,167.143,rs11060179,-0.285  
12,167.186,rs12422603,-0.305  
12,167.267,rs11613890,-0.324  
12,167.297,rs10847798,-0.331  
12,167.324,rs10773613,-0.332  
12,167.381,rs2306517,-0.344  
12,167.418,rs10773623,-0.351  
12,167.574,rs7302528,-0.353  
12,167.614,rs1568474,-0.354  
12,167.724,rs3850004,-0.366  
12,167.728,rs10847832,-0.366  
12,167.823,rs1871898,-0.412  
12,167.831,rs11060280,-0.382  
12,167.848,rs11060288,-0.390  
12,167.921,rs11060321,-0.450  
12,167.926,rs2398459,-0.453  
12,167.945,rs11060331,-0.465  
12,167.991,rs6486467,-0.488  
12,168.036,rs6486470,-0.487  
12,168.040,rs12424570,-0.475  
12,168.041,rs12809344,-0.465  
12,168.050,rs7959926,-0.368  
12,168.052,rs10773664,-0.372  
12,168.155,rs11060378,-0.383  
12,168.196,rs1484009,-0.374  
12,168.206,rs2398463,-0.371  
12,168.215,rs4759955,-0.374  
12,168.256,rs2131257,-0.381  
12,168.269,rs6486483,-0.378  
12,168.366,rs12298735,-0.323  
12,168.410,rs7967283,-0.353



12,168.440,rs7956182,-0.356  
12,168.453,rs7315885,-0.356  
12,168.507,rs10773689,-0.314  
12,168.547,rs265603,-0.329  
12,168.625,rs1451904,-0.352  
12,168.708,rs6486497,-0.376  
12,168.792,rs4468386,-0.433  
12,168.871,rs873029,-0.527  
12,168.874,rs10847946,-0.529  
12,168.884,rs7316914,-0.536  
12,168.902,rs12317107,-0.541  
12,168.983,rs764902,-0.561  
12,169.013,rs7957137,-0.630  
12,169.087,rs12811810,-0.669  
12,169.128,rs10744436,-0.709  
12,169.192,rs478347,-0.706  
12,169.342,rs7955834,-0.629  
12,169.357,rs667393,-0.622  
12,169.445,rs12307812,-0.565  
12,169.452,rs1617236,-0.560  
12,169.458,rs1696435,-0.559  
12,169.518,rs628195,-0.580  
12,169.583,rs826911,-0.559  
12,169.600,rs10847997,-0.552  
12,169.622,rs11060699,-0.496  
12,169.632,rs7137346,-0.443  
12,169.647,rs2292051,-0.428  
12,169.669,rs11060727,-0.410  
12,169.680,rs11060738,-0.395  
12,169.696,rs4760083,-0.373  
12,169.697,rs11614438,-0.372  
12,169.706,rs3741568,-0.363  
12,169.711,rs1566672,-0.365  
12,169.713,rs1979882,-0.368  
12,169.730,rs937534,-0.356  
12,169.764,rs7304152,-0.300  
12,169.801,rs903951,-0.288  
12,169.823,rs428715,-0.281  
12,169.825,rs536745,-0.281  
12,169.858,rs10773760,-0.288  
12,169.862,rs1798296,-0.291  
12,169.945,rs4759454,-0.356  
12,169.967,rs1106042,-0.330  
12,169.991,rs11835358,-0.303  
12,170.006,rs10848092,-0.290  
12,170.044,rs11060872,-0.264  
12,170.069,rs7966010,-0.237  
12,170.075,rs11611873,-0.231  
12,170.100,rs10773783,-0.203  
12,170.118,rs10161112,-0.208  
12,170.133,rs1983313,-0.193  
12,170.151,rs2398513,-0.174  
12,170.172,rs9668242,-0.178  
12,170.179,rs883766,-0.179  
12,170.185,rs4759709,-0.169  
12,170.197,rs1356083,-0.147  
12,170.233,rs12580573,-0.134  
12,170.244,rs12578145,-0.129  
12,170.245,rs12809631,-0.129  
12,170.255,rs11061001,-0.128  
12,170.258,rs10773796,-0.127

12,170.310,rs10848159,-0.110  
12,170.324,rs1487602,-0.116  
12,170.362,rs7968615,-0.126  
12,170.401,rs10773810,-0.123  
12,170.430,rs2398526,-0.133  
12,170.459,rs2695863,-0.133  
12,170.488,rs7138800,-0.108  
12,170.491,rs1195569,-0.134  
12,170.493,rs2695934,-0.140  
12,170.636,rs10848218,-0.080  
12,170.657,rs872396,-0.083  
12,170.736,rs1405904,-0.075  
12,170.752,rs7136250,-0.026  
12,170.767,rs7131934,-0.024  
12,170.780,rs6486617,-0.020  
12,170.787,rs819118,-0.019  
12,170.789,rs843899,-0.019  
12,170.858,rs12302321,-0.022  
12,170.872,rs1195906,-0.022  
12,170.919,rs7301892,-0.026  
12,171.051,rs4075564,-0.035  
12,171.080,rs7300298,-0.033  
12,171.121,rs10773862,-0.021  
12,171.142,rs3890823,-0.030  
12,171.164,rs7314138,-0.031  
12,171.189,rs4237828,-0.031  
12,171.214,rs3934768,-0.032  
12,171.221,rs12819145,-0.031  
12,171.254,rs7398148,-0.034  
12,171.344,rs11061539,-0.051  
12,171.356,rs11061545,-0.053  
12,171.502,rs6598159,-0.077  
12,171.511,rs12825202,-0.078  
12,171.559,rs10794465,-0.082  
12,171.561,rs7294672,-0.082  
12,171.567,rs10902531,-0.081  
12,171.584,rs10794472,-0.068  
12,171.630,rs11611690,-0.070  
12,171.719,rs11246786,-0.066  
12,171.749,rs9971764,-0.064  
12,171.784,rs6598156,-0.064  
12,171.857,rs9634312,-0.061  
12,171.867,rs4964933,-0.060  
12,172.120,rs10902488,-0.049  
12,172.251,rs11831111,-0.057  
12,172.310,rs7961948,-0.058  
12,172.726,rs2323964,-0.035  
12,172.744,rs11146962,-0.045  
12,172.785,rs7296889,-0.043  
12,172.803,rs12316422,-0.045  
12,172.915,rs11146953,-0.058  
12,172.930,rs7294615,-0.060  
12,172.953,rs2323973,-0.060  
12,173.158,rs7136989,-0.065  
12,173.241,rs1564647,-0.067  
12,173.340,rs7970906,-0.061  
12,173.397,rs11147178,-0.051  
12,173.625,rs11147249,-0.040  
12,173.657,rs2292029,-0.041  
12,173.694,rs7313869,-0.043  
13,0.093,rs9285110,0.054

13,0.127,rs4383003,0.054  
13,0.182,rs7323769,0.054  
13,0.468,rs17080439,0.055  
13,0.572,rs7995321,0.054  
13,0.728,rs2225275,0.057  
13,0.797,rs4409941,0.059  
13,0.946,rs12018394,0.064  
13,1.330,rs9552183,0.079  
13,1.461,rs3936015,0.074  
13,1.661,rs12861202,0.064  
13,1.838,rs7327476,0.055  
13,2.004,rs4770052,0.043  
13,2.778,rs9506528,0.017  
13,5.574,rs500755,0.009  
13,5.685,rs945664,0.011  
13,5.978,rs1345067,0.027  
13,6.337,rs9509528,0.028  
13,6.338,rs11843734,0.028  
13,6.381,rs7991284,0.029  
13,6.387,rs4770115,0.021  
13,6.388,rs9552360,0.028  
13,6.518,rs9316157,0.012  
13,6.520,rs7331685,0.012  
13,6.601,rs9506634,0.016  
13,6.669,rs2152244,0.008  
13,6.895,rs12853474,0.015  
13,6.900,rs17356983,0.015  
13,6.982,rs9580094,0.006  
13,7.455,rs2488803,0.010  
13,7.525,rs1323890,0.002  
13,7.574,rs264724,0.001  
13,7.620,rs1208333,0.000  
13,7.643,rs263931,0.000  
13,7.717,rs10047718,0.000  
13,7.810,rs596837,0.002  
13,7.814,rs1886859,0.002  
13,7.859,rs480910,0.003  
13,7.914,rs1326865,0.000  
13,7.929,rs6490671,0.000  
13,7.945,rs1886510,0.001  
13,7.948,rs17072071,0.001  
13,7.951,rs9509870,0.001  
13,7.960,rs7994271,-0.000  
13,7.966,rs17072214,-0.000  
13,7.997,rs9509881,-0.000  
13,8.031,rs7995502,-0.000  
13,8.066,rs17072780,-0.001  
13,8.124,rs9509908,-0.001  
13,8.169,rs17073293,-0.000  
13,8.191,rs9316605,0.000  
13,8.254,rs3129640,-0.001  
13,8.339,rs3129678,-0.000  
13,8.357,rs3129591,0.001  
13,8.365,rs1924206,0.007  
13,8.367,rs3129595,0.014  
13,8.370,rs1924208,0.019  
13,8.478,rs7981623,0.032  
13,8.497,rs8000805,0.021  
13,8.500,rs9509982,0.021  
13,8.511,rs9509983,0.052  
13,8.525,rs4457852,0.055

13,8.541,rs9506777,0.058  
13,8.565,rs12859446,0.057  
13,8.578,rs3945860,0.056  
13,8.616,rs7332465,0.059  
13,8.668,rs9316766,0.064  
13,8.670,rs7139808,0.065  
13,8.688,rs7318731,0.066  
13,8.690,rs9510002,0.061  
13,8.693,rs7982293,0.045  
13,8.697,rs9316801,0.033  
13,8.703,rs6490700,0.018  
13,8.704,rs11620082,0.016  
13,8.706,rs9550817,0.015  
13,8.707,rs7983232,0.015  
13,8.711,rs9578443,0.017  
13,8.726,rs1323165,0.028  
13,8.736,rs9552617,0.034  
13,8.740,rs985288,0.036  
13,8.743,rs7329697,0.034  
13,8.744,rs2320968,0.032  
13,8.750,rs4770252,0.026  
13,8.752,rs2503339,0.022  
13,8.754,rs912325,0.023  
13,8.763,rs951904,0.021  
13,8.766,rs4770258,0.023  
13,8.776,rs2476513,0.025  
13,8.779,rs7327720,0.026  
13,8.782,rs7999201,0.037  
13,8.784,rs9510073,0.036  
13,8.800,rs9506831,0.033  
13,8.814,rs464457,0.033  
13,8.844,rs9510129,0.015  
13,8.852,rs9552636,0.011  
13,8.899,rs2992022,0.005  
13,8.911,rs9317008,0.001  
13,8.939,rs17423874,0.001  
13,9.020,rs431103,0.000  
13,9.055,rs2162250,-0.000  
13,9.081,rs9510308,-0.001  
13,9.171,rs3864963,-0.001  
13,9.417,rs3904322,-0.001  
13,9.565,rs1330919,-0.001  
13,9.771,rs4366580,-0.001  
13,9.845,rs7986449,-0.001  
13,10.000,rs4770334,-0.000  
13,10.400,rs7999417,0.000  
13,10.575,rs7331424,0.004  
13,10.690,rs4770370,0.005  
13,10.714,rs9317418,0.005  
13,10.732,rs1170697,0.005  
13,10.813,rs6490774,0.003  
13,10.866,rs1537969,0.002  
13,11.016,rs9552822,0.010  
13,11.197,rs9317500,0.012  
13,11.223,rs4769241,0.012  
13,11.254,rs9510597,0.013  
13,11.319,rs3764066,0.018  
13,11.320,rs9507041,0.018  
13,11.339,rs597425,0.022  
13,11.384,rs749399,0.031  
13,11.396,rs9580563,0.031

13,11.514,rs7323053,0.031  
13,11.518,rs1359978,0.031  
13,11.530,rs9578562,0.029  
13,11.558,rs7995077,0.023  
13,11.651,rs4769253,0.026  
13,11.690,rs475992,0.034  
13,11.775,rs4770433,0.026  
13,11.953,rs1008812,0.012  
13,12.053,rs4083575,0.004  
13,12.127,rs17070695,0.001  
13,12.177,rs2274928,0.000  
13,12.188,rs7331053,0.000  
13,12.237,rs9317744,0.000  
13,12.237,rs10507331,0.000  
13,12.417,rs9510774,-0.000  
13,12.639,rs9553022,-0.002  
13,12.736,rs8001054,-0.000  
13,12.745,rs913561,0.000  
13,13.181,rs9318064,-0.003  
13,13.280,rs7325694,-0.004  
13,13.422,rs9510934,-0.025  
13,13.547,rs1570885,-0.046  
13,13.557,rs2765114,-0.048  
13,13.567,rs2765122,-0.050  
13,13.570,rs1886796,-0.050  
13,13.595,rs2250115,-0.055  
13,13.678,rs4770541,-0.063  
13,13.768,rs9551041,-0.068  
13,13.772,rs9553146,-0.069  
13,13.777,rs4770557,-0.069  
13,13.798,rs9507223,-0.066  
13,13.877,rs1409020,-0.073  
13,13.890,rs7333781,-0.074  
13,13.937,rs7326323,-0.079  
13,13.939,rs9553164,-0.094  
13,13.994,rs7318560,-0.069  
13,14.032,rs1325662,-0.075  
13,14.077,rs4770601,-0.086  
13,14.112,rs9318347,-0.090  
13,14.152,rs7336618,-0.080  
13,14.168,rs1220582,-0.090  
13,14.168,rs1220583,-0.091  
13,14.199,rs1028695,-0.123  
13,14.251,rs9318387,-0.147  
13,14.254,rs1220569,-0.147  
13,14.331,rs7326788,-0.168  
13,14.385,rs1220597,-0.182  
13,14.472,rs1891105,-0.174  
13,14.483,rs7986973,-0.176  
13,14.547,rs947230,-0.185  
13,14.558,rs3803218,-0.164  
13,14.930,rs9511259,-0.149  
13,15.005,rs2862901,-0.146  
13,15.092,rs7985561,-0.145  
13,15.445,rs8000533,-0.164  
13,15.502,rs1998834,-0.166  
13,15.525,rs7993583,-0.167  
13,15.608,rs7330536,-0.178  
13,15.720,rs2722,-0.161  
13,15.725,rs9318731,-0.160  
13,15.838,rs12585211,-0.160

13,15.843,rs12019525,-0.160  
13,16.260,rs9553464,-0.179  
13,16.306,rs12585556,-0.180  
13,16.374,rs2497600,-0.195  
13,16.397,rs4770771,-0.199  
13,16.438,rs2497615,-0.204  
13,16.449,rs9511601,-0.199  
13,16.460,rs3002182,-0.192  
13,16.557,rs7325885,-0.146  
13,16.565,rs9581282,-0.142  
13,16.587,rs3622,-0.127  
13,16.602,rs9578831,-0.119  
13,16.709,rs17082070,-0.114  
13,16.750,rs12871898,-0.111  
13,16.866,rs7991984,-0.087  
13,16.875,rs11841180,-0.068  
13,16.882,rs12867463,-0.068  
13,16.894,rs17725018,-0.084  
13,16.980,rs7320729,-0.105  
13,17.228,rs1535564,-0.131  
13,17.245,rs10492428,-0.133  
13,17.246,rs3117864,-0.133  
13,17.265,rs3132361,-0.144  
13,17.281,rs9634423,-0.155  
13,17.285,rs9511907,-0.158  
13,17.923,rs769118,-0.198  
13,17.953,rs7358822,-0.195  
13,17.983,rs306416,-0.184  
13,18.012,rs1041052,-0.133  
13,18.021,rs1359311,-0.135  
13,18.030,rs7333000,-0.152  
13,18.034,rs17082912,-0.160  
13,18.103,rs1048787,-0.137  
13,18.104,rs9551232,-0.137  
13,18.119,rs9553712,-0.147  
13,18.124,rs17083075,-0.143  
13,18.162,rs2419887,-0.124  
13,18.172,rs1886489,-0.122  
13,18.283,rs9512144,-0.109  
13,18.292,rs530327,-0.110  
13,18.369,rs10871234,-0.119  
13,18.580,rs17084132,-0.122  
13,18.601,rs1610367,-0.122  
13,18.623,rs6491129,-0.108  
13,18.623,rs7982250,-0.108  
13,18.625,rs924483,-0.106  
13,18.648,rs555722,-0.085  
13,18.651,rs4770993,-0.083  
13,19.277,rs1018123,-0.099  
13,19.497,rs943724,-0.110  
13,19.537,rs932734,-0.103  
13,19.538,rs7998006,-0.107  
13,19.619,rs7321548,-0.113  
13,19.733,rs9285350,-0.098  
13,19.812,rs7333854,-0.094  
13,19.853,rs2182880,-0.091  
13,19.910,rs17084678,-0.100  
13,19.925,rs1108755,-0.102  
13,19.937,rs2149131,-0.102  
13,19.973,rs9553904,-0.103  
13,20.123,rs7338990,-0.126

13,20.175,rs7983414,-0.114  
13,20.225,rs9581775,-0.095  
13,20.251,rs1014472,-0.088  
13,20.256,rs2149220,-0.086  
13,20.287,rs9551341,-0.077  
13,20.302,rs4372560,-0.051  
13,20.324,rs9512448,-0.035  
13,20.340,rs1576168,-0.039  
13,20.392,rs9551343,-0.034  
13,20.429,rs17084974,-0.039  
13,20.436,rs12585310,-0.040  
13,20.499,rs12873430,-0.043  
13,20.528,rs9512476,-0.044  
13,20.638,rs7337170,-0.039  
13,20.708,rs7981663,-0.034  
13,20.790,rs9512519,-0.023  
13,21.208,rs7984685,-0.007  
13,21.479,rs12873548,-0.001  
13,21.770,rs1759857,-0.000  
13,21.811,rs2760902,0.000  
13,21.816,rs9512673,0.001  
13,21.890,rs2892059,0.000  
13,21.926,rs17085657,-0.000  
13,21.934,rs9512713,-0.000  
13,22.068,rs9512759,-0.000  
13,22.192,rs9554143,0.000  
13,22.242,rs11618682,0.000  
13,22.242,rs9512843,0.000  
13,22.318,rs1326384,0.000  
13,22.341,rs7984165,0.000  
13,22.402,rs1970616,0.000  
13,22.437,rs9581919,0.000  
13,22.467,rs1778792,0.001  
13,22.525,rs2387104,0.000  
13,22.660,rs4614573,-0.001  
13,22.696,rs3829382,-0.001  
13,22.727,rs9512980,-0.002  
13,22.776,rs1933437,-0.003  
13,22.912,rs13378207,-0.008  
13,23.157,rs9319424,-0.021  
13,23.235,rs3794399,-0.053  
13,23.236,rs2296189,-0.067  
13,23.339,rs9554325,-0.115  
13,23.380,rs6491283,-0.117  
13,23.485,rs622227,-0.109  
13,23.592,rs9550377,-0.095  
13,23.623,rs7320503,-0.090  
13,23.648,rs17086813,-0.069  
13,23.671,rs7321093,-0.052  
13,23.713,rs7997858,-0.022  
13,23.722,rs1980747,-0.020  
13,23.766,rs17086947,-0.019  
13,23.798,rs8002632,-0.019  
13,23.857,rs12867747,-0.027  
13,23.983,rs1305115,-0.021  
13,24.079,rs6490331,-0.029  
13,24.190,rs7992387,-0.033  
13,24.322,rs327118,-0.036  
13,24.554,rs1885538,-0.031  
13,24.677,rs17650122,-0.030  
13,24.716,rs9551592,-0.029

13,25.189,rs7332351,-0.031  
13,25.239,rs1927836,-0.028  
13,25.397,rs7997835,-0.018  
13,25.407,rs11617962,-0.018  
13,25.844,rs2992385,-0.023  
13,25.908,rs4341627,-0.024  
13,26.037,rs9508345,-0.024  
13,26.054,rs12874453,-0.024  
13,26.256,rs9508405,-0.025  
13,26.423,rs7334388,-0.020  
13,26.619,rs7984403,-0.017  
13,26.623,rs9551682,-0.017  
13,26.648,rs4379923,-0.019  
13,26.685,rs1986785,-0.019  
13,26.763,rs2388084,-0.012  
13,26.807,rs4769753,-0.012  
13,26.845,rs7324267,-0.017  
13,26.873,rs7329421,-0.019  
13,27.056,rs1571786,-0.047  
13,27.084,rs9579398,-0.047  
13,27.290,rs9551705,-0.033  
13,28.006,rs7321345,-0.030  
13,28.028,rs17631397,-0.030  
13,28.052,rs2388238,-0.030  
13,28.078,rs1547162,-0.021  
13,28.236,rs7994485,-0.012  
13,28.268,rs9579518,-0.012  
13,28.290,rs626014,-0.012  
13,28.297,rs4769026,-0.012  
13,28.305,rs12427942,-0.011  
13,28.346,rs504508,-0.006  
13,28.350,rs656962,-0.006  
13,28.375,rs2038936,-0.010  
13,28.396,rs1409504,-0.013  
13,28.413,rs750683,-0.015  
13,28.418,rs913905,-0.015  
13,28.466,rs12583235,-0.020  
13,28.472,rs2892537,-0.020  
13,28.491,rs10478,-0.017  
13,28.500,rs11617724,-0.017  
13,28.539,rs202093,-0.018  
13,28.560,rs17633078,-0.019  
13,28.623,rs202080,-0.020  
13,28.633,rs9508701,-0.021  
13,28.709,rs9508716,-0.020  
13,28.732,rs7986129,-0.016  
13,28.759,rs9550565,-0.011  
13,28.775,rs7320510,-0.008  
13,28.832,rs1412125,-0.010  
13,28.848,rs1467719,-0.012  
13,28.851,rs9550568,-0.012  
13,28.870,rs12431309,-0.018  
13,28.881,rs9508766,-0.019  
13,28.911,rs9506325,-0.016  
13,28.939,rs9508795,-0.010  
13,28.948,rs9508798,-0.001  
13,28.949,rs1570613,-0.000  
13,28.950,rs1331697,0.000  
13,28.953,rs9508801,0.003  
13,29.066,rs6490474,0.000  
13,29.128,rs9315027,0.000



13,29.138,rs7995384,0.000  
13,29.238,rs9579654,-0.000  
13,29.303,rs11843688,-0.001  
13,29.327,rs9550354,-0.001  
13,29.365,rs12876893,-0.001  
13,29.439,rs2313742,-0.001  
13,29.465,rs727120,-0.002  
13,29.526,rs4943311,-0.007  
13,29.554,rs6563504,-0.007  
13,29.668,rs1331847,-0.011  
13,29.806,rs2313000,-0.013  
13,29.830,rs9596054,-0.011  
13,29.919,rs4943074,-0.030  
13,29.954,rs9591599,-0.039  
13,30.001,rs9527530,-0.055  
13,30.038,rs912294,-0.064  
13,30.206,rs9598993,-0.070  
13,30.270,rs7981424,-0.061  
13,30.501,rs17631074,-0.023  
13,30.599,rs17075938,-0.013  
13,30.612,rs9546363,-0.011  
13,30.672,rs12100418,-0.007  
13,30.703,rs11841788,-0.002  
13,30.703,rs3915915,-0.000  
13,30.717,rs7321575,-0.001  
13,30.753,rs1410811,-0.001  
13,30.876,rs1613660,-0.000  
13,30.956,rs598700,-0.001  
13,31.115,rs277145,-0.007  
13,31.137,rs6563643,-0.008  
13,31.260,rs2181255,-0.023  
13,31.288,rs7139573,-0.026  
13,31.318,rs9549299,-0.032  
13,31.324,rs524566,-0.034  
13,31.401,rs6561013,-0.029  
13,31.415,rs426307,-0.030  
13,31.431,rs365873,-0.031  
13,31.485,rs424118,-0.030  
13,31.524,rs9315155,-0.032  
13,31.556,rs396150,-0.036  
13,31.638,rs2520696,-0.062  
13,31.655,rs9525969,-0.075  
13,31.662,rs9595159,-0.080  
13,31.681,rs2806628,-0.061  
13,31.685,rs9567484,-0.061  
13,31.717,rs2078326,-0.070  
13,31.793,rs4942486,-0.059  
13,31.810,rs1207952,-0.059  
13,32.042,rs4942925,-0.040  
13,32.044,rs990324,-0.040  
13,32.085,rs2147356,-0.035  
13,32.088,rs3848090,-0.034  
13,32.119,rs743874,-0.025  
13,32.121,rs17643100,-0.033  
13,32.122,rs426049,-0.025  
13,32.122,rs378609,-0.025  
13,32.131,rs566528,-0.024  
13,32.138,rs398655,-0.024  
13,32.178,rs677332,-0.019  
13,32.422,rs797224,-0.016  
13,32.459,rs703232,-0.016

13,32.493,rs797190,-0.018  
13,32.494,rs9591586,-0.018  
13,32.518,rs2764624,-0.018  
13,32.633,rs9536928,-0.021  
13,32.895,rs9597332,-0.026  
13,32.957,rs7334982,-0.025  
13,33.200,rs7324034,-0.020  
13,33.236,rs7323357,-0.020  
13,33.321,rs11618678,-0.014  
13,33.354,rs7333539,-0.012  
13,33.409,rs2321480,-0.015  
13,33.454,rs4943138,-0.016  
13,33.529,rs9538624,-0.016  
13,33.675,rs1329667,-0.017  
13,33.796,rs1328667,-0.021  
13,33.895,rs1328660,-0.018  
13,33.904,rs581738,-0.011  
13,33.905,rs1328658,-0.011  
13,33.922,rs9570962,-0.013  
13,33.950,rs1832265,-0.017  
13,33.954,rs9528685,-0.017  
13,33.960,rs12584168,-0.017  
13,34.027,rs11839186,-0.018  
13,34.064,rs7992404,-0.022  
13,34.115,rs9528902,-0.033  
13,34.173,rs602078,-0.038  
13,34.211,rs9540648,-0.038  
13,34.265,rs9540823,-0.040  
13,34.328,rs5027696,-0.042  
13,34.370,rs2322115,-0.040  
13,34.409,rs913692,-0.036  
13,34.414,rs1998660,-0.035  
13,34.417,rs1410950,-0.035  
13,34.461,rs9599293,-0.038  
13,34.582,rs1876583,-0.053  
13,34.598,rs1876582,-0.055  
13,34.645,rs968352,-0.060  
13,34.645,rs968351,-0.060  
13,34.651,rs9542104,-0.073  
13,34.755,rs9599726,-0.074  
13,34.767,rs9599736,-0.075  
13,34.772,rs1323949,-0.075  
13,34.821,rs9572720,-0.079  
13,35.454,rs9544368,-0.137  
13,35.539,rs958793,-0.141  
13,35.724,rs2798338,-0.174  
13,35.779,rs410595,-0.176  
13,35.918,rs9545074,-0.179  
13,35.929,rs445435,-0.185  
13,35.955,rs9530931,-0.194  
13,35.987,rs4941815,-0.204  
13,36.104,rs9574622,-0.164  
13,36.165,rs10507431,-0.171  
13,36.216,rs1926466,-0.200  
13,36.233,rs12427459,-0.216  
13,36.265,rs2051090,-0.218  
13,36.276,rs10507437,-0.209  
13,36.315,rs11147593,-0.205  
13,36.337,rs1891673,-0.204  
13,36.384,rs9574960,-0.190  
13,36.421,rs9545925,-0.179

13,36.456,rs9531304,-0.176  
13,36.510,rs1170994,-0.139  
13,36.690,rs9531436,-0.177  
13,36.757,rs1556060,-0.184  
13,36.816,rs12861843,-0.188  
13,37.199,rs3736919,-0.154  
13,37.541,rs1517897,-0.166  
13,37.578,rs9315431,-0.163  
13,37.579,rs9315432,-0.161  
13,37.601,rs1517882,-0.155  
13,37.709,rs1517887,-0.184  
13,37.719,rs2759295,-0.166  
13,37.753,rs9566152,-0.174  
13,37.797,rs7323558,-0.163  
13,37.861,rs1407586,-0.150  
13,37.904,rs2025237,-0.135  
13,37.952,rs7991888,-0.092  
13,37.955,rs9603089,-0.092  
13,38.020,rs9547668,-0.062  
13,38.057,rs1328038,-0.055  
13,38.119,rs609418,-0.043  
13,38.162,rs3748305,-0.040  
13,38.162,rs678037,-0.040  
13,38.193,rs648206,-0.035  
13,39.008,rs9547750,-0.012  
13,39.103,rs6563522,-0.013  
13,39.164,rs1408234,-0.015  
13,39.322,rs10507452,-0.022  
13,39.359,rs6563528,-0.024  
13,39.430,rs7321497,-0.021  
13,39.521,rs9532064,-0.019  
13,39.536,rs17055893,-0.018  
13,39.675,rs6563562,-0.016  
13,39.781,rs7332871,-0.014  
13,39.807,rs1924304,-0.020  
13,39.869,rs2991010,-0.019  
13,39.921,rs9603254,-0.017  
13,39.944,rs11147670,-0.017  
13,39.974,rs9576354,-0.018  
13,40.040,rs612701,-0.023  
13,40.092,rs4144140,-0.022  
13,40.191,rs1337604,-0.025  
13,40.247,rs9576408,-0.013  
13,40.412,rs9548183,-0.008  
13,40.537,rs612572,-0.009  
13,40.545,rs683479,-0.009  
13,40.667,rs473755,-0.028  
13,40.697,rs1553301,-0.042  
13,40.725,rs658206,-0.043  
13,40.726,rs607574,-0.057  
13,41.080,rs9548413,-0.040  
13,41.164,rs2122211,-0.038  
13,41.183,rs990909,-0.041  
13,41.221,rs9603418,-0.045  
13,41.226,rs2442361,-0.049  
13,41.239,rs9566362,-0.057  
13,41.244,rs7335905,-0.059  
13,41.252,rs9594293,-0.067  
13,41.277,rs4943605,-0.092  
13,41.278,rs9576628,-0.094  
13,41.341,rs9548534,-0.127

13,41.379,rs11840412,-0.127  
13,41.394,rs9548568,-0.108  
13,42.228,rs9566412,-0.112  
13,42.315,rs9576762,-0.114  
13,43.068,rs9315678,-0.192  
13,43.098,rs1186468,-0.205  
13,43.208,rs17803662,-0.290  
13,43.240,rs641027,-0.300  
13,43.247,rs927924,-0.339  
13,43.267,rs13313352,-0.315  
13,43.272,rs11617562,-0.314  
13,43.272,rs7326616,-0.312  
13,43.290,rs2145805,-0.273  
13,43.307,rs8000689,-0.265  
13,43.330,rs2701853,-0.313  
13,43.343,rs2246612,-0.306  
13,43.376,rs2721052,-0.278  
13,43.406,rs2755209,-0.250  
13,43.465,rs17630266,-0.232  
13,43.653,rs2282022,-0.178  
13,43.667,rs7335572,-0.175  
13,43.715,rs4941999,-0.167  
13,44.053,rs488873,-0.143  
13,44.097,rs2026468,-0.140  
13,44.133,rs9532758,-0.149  
13,44.252,rs9525479,-0.167  
13,44.351,rs3783197,-0.160  
13,44.380,rs9562311,-0.155  
13,44.460,rs7999970,-0.131  
13,44.916,rs12585194,-0.131  
13,44.986,rs9525560,-0.137  
13,45.377,rs9525590,-0.156  
13,45.414,rs9533031,-0.157  
13,45.488,rs238349,-0.134  
13,45.503,rs9533044,-0.134  
13,45.562,rs9315903,-0.133  
13,45.629,rs7994365,-0.130  
13,45.796,rs386283,-0.130  
13,46.000,rs9594759,-0.128  
13,46.086,rs9315923,-0.138  
13,46.316,rs3742257,-0.123  
13,46.402,rs7994396,-0.123  
13,46.573,rs9533215,-0.122  
13,46.801,rs1535904,-0.149  
13,46.887,rs1324418,-0.180  
13,46.997,rs9533297,-0.207  
13,47.034,rs12863816,-0.207  
13,47.035,rs9567068,-0.207  
13,47.123,rs9525716,-0.268  
13,47.165,rs1886152,-0.284  
13,47.185,rs11147895,-0.281  
13,47.320,rs6561104,-0.255  
13,47.495,rs9533399,-0.233  
13,47.501,rs2589307,-0.233  
13,47.563,rs1156026,-0.228  
13,47.571,rs1008913,-0.225  
13,47.601,rs2589315,-0.205  
13,47.642,rs7323280,-0.178  
13,47.761,rs9285151,-0.174  
13,47.827,rs730210,-0.176  
13,47.937,rs12857536,-0.181

13,47.959,rs745334,-0.190  
13,48.011,rs9533457,-0.220  
13,48.116,rs7329258,-0.232  
13,48.169,rs7994773,-0.227  
13,48.363,rs7336352,-0.205  
13,48.474,rs9533567,-0.208  
13,48.485,rs17539034,-0.232  
13,48.486,rs1329294,-0.221  
13,48.718,rs7992315,-0.237  
13,48.762,rs652145,-0.239  
13,48.837,rs9533738,-0.238  
13,48.882,rs17065323,-0.265  
13,48.892,rs9567352,-0.271  
13,48.892,rs9316067,-0.275  
13,48.892,rs9533758,-0.276  
13,48.898,rs4942273,-0.323  
13,48.921,rs4941481,-0.340  
13,48.953,rs9533775,-0.385  
13,49.038,rs2243839,-0.389  
13,49.045,rs1330101,-0.389  
13,49.059,rs7320491,-0.392  
13,49.084,rs2246264,-0.396  
13,49.114,rs9567399,-0.402  
13,49.151,rs2104755,-0.418  
13,49.189,rs17208897,-0.416  
13,49.223,rs2281848,-0.418  
13,49.231,rs12868519,-0.418  
13,49.274,rs6561176,-0.420  
13,49.504,rs963569,-0.425  
13,49.505,rs9567458,-0.425  
13,49.556,rs2786712,-0.423  
13,49.566,rs4942350,-0.422  
13,49.566,rs4942351,-0.422  
13,49.636,rs9533975,-0.446  
13,49.687,rs12427910,-0.454  
13,49.693,rs9567488,-0.461  
13,49.712,rs7332654,-0.484  
13,49.739,rs7317524,-0.514  
13,49.741,rs12865097,-0.516  
13,49.891,rs1747107,-0.574  
13,49.952,rs2025420,-0.609  
13,50.145,rs9526055,-0.684  
13,50.277,rs9526073,-0.683  
13,50.369,rs2985983,-0.762  
13,50.428,rs7330573,-0.758  
13,50.430,rs2985947,-0.757  
13,50.507,rs9534188,-0.718  
13,50.529,rs1536191,-0.706  
13,50.545,rs1072696,-0.713  
13,50.561,rs9316154,-0.732  
13,50.565,rs9534199,-0.732  
13,50.609,rs1325643,-0.712  
13,50.628,rs4942434,-0.713  
13,50.635,rs7997707,-0.711  
13,50.644,rs1325654,-0.688  
13,50.683,rs9526115,-0.644  
13,50.718,rs2766484,-0.608  
13,50.720,rs7982931,-0.608  
13,50.731,rs2573294,-0.652  
13,50.746,rs7996510,-0.658  
13,50.758,rs7330302,-0.670

13,50.762,rs2573283,-0.675  
13,50.788,rs2573260,-0.746  
13,50.813,rs12585823,-0.771  
13,50.843,rs9534271,-0.778  
13,50.951,rs2181617,-0.795  
13,50.954,rs17067700,-0.794  
13,50.960,rs2025736,-0.780  
13,51.008,rs1886040,-0.741  
13,51.087,rs2209092,-0.670  
13,51.097,rs2209090,-0.641  
13,51.152,rs6561302,-0.639  
13,51.216,rs912784,-0.673  
13,51.250,rs2765614,-0.696  
13,51.256,rs17067974,-0.697  
13,51.280,rs727487,-0.705  
13,51.338,rs12870900,-0.803  
13,51.353,rs912435,-0.818  
13,51.360,rs3742269,-0.824  
13,51.360,rs3742270,-0.825  
13,51.392,rs4942568,-0.766  
13,51.401,rs842383,-0.736  
13,51.411,rs9590984,-0.646  
13,51.414,rs9534475,-0.621  
13,51.422,rs17068766,-0.590  
13,51.422,rs6561329,-0.590  
13,51.446,rs1018578,-0.507  
13,51.451,rs9567729,-0.500  
13,51.455,rs9567733,-0.493  
13,51.465,rs622337,-0.484  
13,51.467,rs4942578,-0.466  
13,51.481,rs9534511,-0.489  
13,51.487,rs2039093,-0.495  
13,51.511,rs4942595,-0.510  
13,51.536,rs1536762,-0.493  
13,51.555,rs4942611,-0.471  
13,51.563,rs7332165,-0.466  
13,51.593,rs4142746,-0.455  
13,51.650,rs8002509,-0.427  
13,51.691,rs9526307,-0.414  
13,51.738,rs9534613,-0.404  
13,51.847,rs2503449,-0.418  
13,51.874,rs943238,-0.413  
13,52.054,rs1886439,-0.513  
13,52.072,rs9534844,-0.524  
13,52.282,rs1410117,-0.560  
13,52.308,rs645833,-0.557  
13,52.309,rs9526457,-0.557  
13,52.780,rs9595932,-0.502  
13,52.831,rs9595945,-0.495  
13,52.836,rs2026581,-0.494  
13,52.919,rs6561497,-0.491  
13,52.981,rs9316430,-0.486  
13,53.124,rs8002829,-0.473  
13,53.154,rs9568197,-0.560  
13,53.165,rs2407616,-0.563  
13,53.302,rs7322971,-0.489  
13,53.623,rs3809325,-0.452  
13,53.926,rs3903768,-0.455  
13,54.454,rs9535416,-0.445  
13,54.714,rs1028814,-0.441  
13,54.849,rs806321,-0.500

13,54.853,rs806345,-0.463  
13,54.873,rs1410113,-0.486  
13,54.885,rs201779,-0.506  
13,54.907,rs770391,-0.541  
13,54.908,rs7993968,-0.549  
13,54.919,rs706596,-0.600  
13,54.931,rs2540521,-0.623  
13,54.937,rs2706238,-0.631  
13,54.940,rs10467383,-0.635  
13,54.943,rs7331957,-0.639  
13,54.943,rs11616485,-0.639  
13,54.975,rs474012,-0.679  
13,54.984,rs1462031,-0.690  
13,54.991,rs9316511,-0.678  
13,54.995,rs9526706,-0.661  
13,55.031,rs2025945,-0.632  
13,55.046,rs11840971,-0.612  
13,55.055,rs6561611,-0.611  
13,55.057,rs9596437,-0.615  
13,55.063,rs3803200,-0.631  
13,55.076,rs8002769,-0.621  
13,55.085,rs927863,-0.632  
13,55.090,rs7325564,-0.644  
13,55.090,rs1022960,-0.644  
13,55.091,rs2094278,-0.648  
13,55.097,rs9285176,-0.648  
13,55.101,rs17252027,-0.643  
13,55.102,rs9535607,-0.640  
13,55.109,rs9563035,-0.623  
13,55.124,rs1077728,-0.606  
13,55.141,rs4942988,-0.584  
13,55.149,rs7325958,-0.609  
13,55.160,rs11842214,-0.608  
13,55.170,rs7338174,-0.608  
13,55.174,rs7983548,-0.608  
13,55.272,rs9563062,-0.604  
13,55.302,rs7332922,-0.595  
13,55.509,rs1543525,-0.536  
13,55.526,rs7318017,-0.536  
13,55.532,rs7326878,-0.535  
13,55.549,rs578134,-0.498  
13,55.558,rs4459459,-0.535  
13,55.596,rs17076104,-0.542  
13,55.974,rs9536079,-0.429  
13,56.014,rs1535576,-0.486  
13,56.020,rs1115871,-0.481  
13,56.026,rs997687,-0.477  
13,56.035,rs17053117,-0.476  
13,56.056,rs9536335,-0.498  
13,56.061,rs9536337,-0.503  
13,56.064,rs2298229,-0.506  
13,56.069,rs3803261,-0.509  
13,56.074,rs2298235,-0.507  
13,56.101,rs2806984,-0.487  
13,56.114,rs4886202,-0.472  
13,56.178,rs9563146,-0.445  
13,56.216,rs9596786,-0.428  
13,56.300,rs9536591,-0.387  
13,56.302,rs9316694,-0.387  
13,56.311,rs9568981,-0.385  
13,56.314,rs9596918,-0.379

13,56.317,rs706588,-0.380  
13,56.321,rs9563202,-0.381  
13,56.327,rs654775,-0.379  
13,56.331,rs9536672,-0.378  
13,56.337,rs8001194,-0.354  
13,56.340,rs7328532,-0.366  
13,56.354,rs9316728,-0.436  
13,56.356,rs9563233,-0.444  
13,56.357,rs1832696,-0.447  
13,56.358,rs9597001,-0.449  
13,56.372,rs9527255,-0.495  
13,56.373,rs2493675,-0.495  
13,56.387,rs1539237,-0.501  
13,56.406,rs9597069,-0.486  
13,56.410,rs1028774,-0.479  
13,56.422,rs3120890,-0.460  
13,56.448,rs9316785,-0.478  
13,56.467,rs4885913,-0.490  
13,56.557,rs9563423,-0.459  
13,56.588,rs9527559,-0.447  
13,56.682,rs17053883,-0.412  
13,56.810,rs1374481,-0.384  
13,56.813,rs9569712,-0.384  
13,56.842,rs9527681,-0.376  
13,56.875,rs9537793,-0.378  
13,57.072,rs2921406,-0.404  
13,57.111,rs4360824,-0.410  
13,57.224,rs9538051,-0.430  
13,57.241,rs9538073,-0.432  
13,57.281,rs1330742,-0.429  
13,57.337,rs9538162,-0.437  
13,57.355,rs12869090,-0.422  
13,57.355,rs11841892,-0.422  
13,57.396,rs9597861,-0.426  
13,57.583,rs4886114,-0.460  
13,57.605,rs2321997,-0.461  
13,57.643,rs6562010,-0.447  
13,57.655,rs7991723,-0.433  
13,57.700,rs9597949,-0.333  
13,57.715,rs17056143,-0.331  
13,57.720,rs4884323,-0.330  
13,57.731,rs17056224,-0.322  
13,57.737,rs4886139,-0.317  
13,57.770,rs901510,-0.302  
13,57.786,rs9538386,-0.299  
13,57.811,rs9527970,-0.292  
13,57.876,rs746816,-0.273  
13,57.919,rs1225405,-0.251  
13,57.926,rs1623579,-0.247  
13,57.946,rs1711782,-0.234  
13,58.186,rs7986379,-0.141  
13,58.200,rs341497,-0.139  
13,58.240,rs17729071,-0.141  
13,58.473,rs9592025,-0.162  
13,58.525,rs2487783,-0.150  
13,58.526,rs9563808,-0.150  
13,58.571,rs9598117,-0.126  
13,58.589,rs9317116,-0.139  
13,58.593,rs9538660,-0.142  
13,58.608,rs9528119,-0.141  
13,58.619,rs9528128,-0.148



13,58.838,rs4886250,-0.126  
13,58.846,rs1576377,-0.118  
13,58.850,rs1329701,-0.118  
13,58.859,rs17058620,-0.135  
13,58.860,rs1411145,-0.137  
13,58.897,rs3106557,-0.146  
13,58.961,rs3119873,-0.219  
13,58.971,rs3914414,-0.226  
13,59.021,rs9598200,-0.220  
13,59.025,rs9598204,-0.220  
13,59.072,rs7985758,-0.207  
13,59.074,rs9598229,-0.207  
13,59.104,rs1913556,-0.197  
13,59.115,rs3106598,-0.195  
13,59.130,rs1514551,-0.182  
13,59.171,rs2669333,-0.148  
13,59.441,rs2992170,-0.094  
13,59.531,rs9528622,-0.106  
13,59.628,rs17356288,-0.107  
13,59.637,rs4884489,-0.108  
13,59.662,rs10507697,-0.110  
13,59.705,rs2587605,-0.096  
13,59.715,rs2587602,-0.096  
13,59.767,rs9539845,-0.098  
13,59.986,rs4883727,-0.096  
13,60.032,rs3911994,-0.078  
13,60.055,rs269623,-0.078  
13,60.102,rs956300,-0.078  
13,60.258,rs9540053,-0.077  
13,60.313,rs9540074,-0.069  
13,60.335,rs7991961,-0.070  
13,60.461,rs9528794,-0.074  
13,60.471,rs649783,-0.074  
13,60.483,rs12428774,-0.075  
13,60.484,rs9540172,-0.075  
13,60.488,rs359384,-0.084  
13,60.554,rs396985,-0.080  
13,60.737,rs7994896,-0.076  
13,60.978,rs778437,-0.070  
13,61.161,rs10507721,-0.065  
13,61.267,rs9317526,-0.050  
13,61.289,rs7990415,-0.050  
13,61.302,rs11619878,-0.040  
13,61.416,rs1417216,-0.048  
13,61.495,rs9540556,-0.056  
13,61.501,rs2151399,-0.057  
13,61.548,rs17078058,-0.049  
13,61.564,rs7332806,-0.047  
13,61.609,rs2324857,-0.045  
13,61.618,rs2183456,-0.047  
13,61.637,rs166503,-0.053  
13,61.658,rs7986387,-0.057  
13,61.659,rs3843947,-0.057  
13,61.674,rs17583414,-0.065  
13,61.702,rs6562468,-0.081  
13,61.711,rs2224740,-0.082  
13,61.736,rs9564355,-0.084  
13,61.744,rs9540942,-0.086  
13,61.764,rs1323913,-0.074  
13,61.850,rs1323929,-0.084  
13,62.086,rs7336017,-0.094

13,62.116,rs7324254,-0.095  
13,62.156,rs1927821,-0.081  
13,62.199,rs9317651,-0.086  
13,62.413,rs1760854,-0.113  
13,62.419,rs9571811,-0.114  
13,62.424,rs2325065,-0.097  
13,62.428,rs1475808,-0.098  
13,62.432,rs167021,-0.098  
13,62.432,rs12876169,-0.101  
13,62.437,rs9599282,-0.131  
13,62.518,rs1146827,-0.107  
13,62.534,rs9571875,-0.106  
13,62.582,rs9541341,-0.104  
13,62.606,rs17083392,-0.103  
13,62.644,rs525327,-0.101  
13,62.694,rs1507198,-0.101  
13,62.738,rs9599332,-0.100  
13,62.745,rs937872,-0.100  
13,62.785,rs7997369,-0.079  
13,62.816,rs1340741,-0.076  
13,62.844,rs9529475,-0.091  
13,62.862,rs9541702,-0.091  
13,62.888,rs1340722,-0.075  
13,63.049,rs9529522,-0.087  
13,63.075,rs12429777,-0.089  
13,63.096,rs9317784,-0.091  
13,63.401,rs1330534,-0.131  
13,63.497,rs9541963,-0.157  
13,63.564,rs7986686,-0.170  
13,63.927,rs7985162,-0.154  
13,64.005,rs7984606,-0.151  
13,64.052,rs9599521,-0.149  
13,64.139,rs9542109,-0.142  
13,64.210,rs2210447,-0.131  
13,64.211,rs683300,-0.131  
13,64.282,rs302020,-0.121  
13,64.297,rs7322990,-0.118  
13,64.392,rs1887826,-0.094  
13,64.403,rs9529709,-0.093  
13,64.538,rs7986958,-0.075  
13,64.625,rs1930861,-0.118  
13,64.629,rs1930855,-0.119  
13,64.647,rs914906,-0.127  
13,64.778,rs9542407,-0.127  
13,64.791,rs9529782,-0.143  
13,64.916,rs9572516,-0.115  
13,65.071,rs1413141,-0.079  
13,65.216,rs2586131,-0.117  
13,65.223,rs615018,-0.119  
13,65.284,rs4884901,-0.136  
13,65.302,rs9572541,-0.161  
13,65.338,rs566682,-0.153  
13,65.379,rs9529809,-0.123  
13,65.384,rs1280914,-0.120  
13,65.387,rs4884906,-0.118  
13,65.420,rs9572564,-0.133  
13,65.453,rs9542535,-0.156  
13,65.476,rs950942,-0.204  
13,65.486,rs17087794,-0.204  
13,65.504,rs803853,-0.205  
13,65.526,rs1911141,-0.194

13,65.595,rs4884931,-0.195  
13,65.714,rs10492467,-0.195  
13,65.835,rs9572687,-0.198  
13,65.995,rs7995527,-0.194  
13,66.248,rs9572724,-0.184  
13,66.278,rs7981837,-0.184  
13,66.357,rs9572739,-0.193  
13,66.567,rs9599848,-0.191  
13,66.810,rs9599857,-0.208  
13,67.102,rs8000426,-0.244  
13,67.164,rs17088400,-0.251  
13,67.193,rs7993403,-0.253  
13,67.195,rs7998414,-0.254  
13,67.385,rs303942,-0.290  
13,67.506,rs9542775,-0.315  
13,67.507,rs7328290,-0.315  
13,67.597,rs9529945,-0.321  
13,67.697,rs2148513,-0.280  
13,67.763,rs7322145,-0.296  
13,67.785,rs517248,-0.308  
13,67.798,rs4884998,-0.322  
13,67.831,rs491183,-0.317  
13,67.840,rs9542922,-0.304  
13,67.844,rs9572959,-0.303  
13,67.862,rs7319520,-0.280  
13,67.887,rs4883910,-0.294  
13,67.925,rs9318078,-0.313  
13,67.988,rs7325978,-0.321  
13,68.000,rs1924957,-0.289  
13,68.095,rs1998678,-0.296  
13,68.114,rs9542990,-0.298  
13,68.149,rs17244714,-0.293  
13,68.195,rs11839068,-0.286  
13,68.341,rs1124204,-0.275  
13,68.421,rs11840463,-0.273  
13,68.662,rs1437656,-0.268  
13,68.728,rs4119478,-0.260  
13,69.000,rs9543110,-0.230  
13,69.156,rs7332615,-0.224  
13,69.254,rs12874868,-0.218  
13,69.795,rs4885065,-0.214  
13,69.801,rs12869881,-0.212  
13,69.823,rs1333099,-0.208  
13,69.849,rs9600079,-0.204  
13,69.896,rs9573135,-0.183  
13,69.907,rs1983981,-0.178  
13,69.916,rs6562747,-0.175  
13,69.928,rs1327620,-0.163  
13,69.949,rs7998062,-0.154  
13,69.955,rs9543307,-0.157  
13,69.972,rs4885088,-0.136  
13,70.007,rs9543325,-0.135  
13,70.032,rs17090102,-0.121  
13,70.050,rs4885098,-0.107  
13,70.099,rs7982832,-0.101  
13,70.314,rs17090302,-0.090  
13,70.348,rs2325539,-0.088  
13,70.403,rs7321306,-0.086  
13,70.546,rs7992690,-0.123  
13,70.596,rs10219971,-0.119  
13,70.602,rs9600160,-0.117

13,70.629,rs1324059,-0.125  
13,70.634,rs2875666,-0.125  
13,70.651,rs1011058,-0.155  
13,70.706,rs1324061,-0.154  
13,70.719,rs9573305,-0.160  
13,70.756,rs2182667,-0.177  
13,70.783,rs9565053,-0.188  
13,70.795,rs9530253,-0.188  
13,70.796,rs9600179,-0.189  
13,70.831,rs17061643,-0.160  
13,70.890,rs9318226,-0.091  
13,70.928,rs9600191,-0.101  
13,70.980,rs1570745,-0.115  
13,71.073,rs7324708,-0.142  
13,71.150,rs9565073,-0.143  
13,71.177,rs4885149,-0.142  
13,71.291,rs7988654,-0.131  
13,71.554,rs7321013,-0.086  
13,71.661,rs9543630,-0.058  
13,71.716,rs6562832,-0.045  
13,71.817,rs1409588,-0.028  
13,71.833,rs1326731,-0.019  
13,71.870,rs1326701,-0.006  
13,71.898,rs10507828,-0.003  
13,71.915,rs9593015,-0.001  
13,71.922,rs1327745,-0.001  
13,71.955,rs9530368,-0.005  
13,71.997,rs7989384,-0.007  
13,72.007,rs875548,-0.007  
13,72.090,rs8001831,-0.011  
13,72.274,rs1538946,-0.014  
13,72.276,rs7992778,-0.014  
13,72.276,rs9573460,-0.014  
13,72.347,rs1326057,-0.012  
13,72.359,rs7318676,-0.011  
13,72.469,rs7327783,-0.020  
13,72.496,rs481952,-0.019  
13,72.509,rs2060136,-0.018  
13,72.510,rs532095,-0.018  
13,72.535,rs9543882,-0.010  
13,72.563,rs566337,-0.006  
13,72.577,rs2297208,-0.004  
13,72.579,rs517130,-0.008  
13,72.625,rs568772,-0.016  
13,72.756,rs9600477,-0.020  
13,72.803,rs7319334,-0.022  
13,72.938,rs9593109,-0.024  
13,72.953,rs4884012,-0.024  
13,72.997,rs1570554,-0.025  
13,73.111,rs4884021,-0.026  
13,73.163,rs9544061,-0.027  
13,73.204,rs9544077,-0.027  
13,73.233,rs1538902,-0.026  
13,73.256,rs1340711,-0.026  
13,73.259,rs9593147,-0.026  
13,74.339,rs9544492,-0.000  
13,74.398,rs8001791,0.000  
13,74.475,rs9565348,0.001  
13,74.759,rs1053985,0.002  
13,74.988,rs9574113,0.000  
13,75.165,rs7994107,-0.000

13,75.299,rs11616218,-0.000  
13,75.325,rs2254690,0.000  
13,75.331,rs17069125,0.000  
13,75.336,rs3908461,0.000  
13,75.350,rs3861137,0.002  
13,75.350,rs12583965,0.002  
13,75.354,rs7332088,0.002  
13,75.355,rs1972228,0.003  
13,75.371,rs1324796,0.008  
13,75.433,rs9544800,0.026  
13,75.452,rs11619235,0.031  
13,75.486,rs9530803,0.044  
13,75.492,rs9593346,0.045  
13,75.512,rs9530807,0.045  
13,75.526,rs1931035,0.045  
13,75.531,rs9530815,0.046  
13,75.567,rs7992385,0.044  
13,75.581,rs1341138,0.039  
13,75.587,rs7327514,0.037  
13,75.625,rs9574337,0.023  
13,75.642,rs9601157,0.017  
13,75.647,rs9544950,0.016  
13,75.755,rs661907,0.012  
13,75.835,rs7986836,0.013  
13,75.872,rs2988039,0.013  
13,75.916,rs9318616,0.012  
13,75.965,rs9574389,0.003  
13,76.248,rs9601248,0.004  
13,76.286,rs1998452,0.004  
13,76.346,rs17071785,0.004  
13,76.372,rs1577406,0.004  
13,76.387,rs2095470,0.004  
13,76.515,rs12876803,0.003  
13,76.564,rs17794787,0.002  
13,76.605,rs3843950,0.001  
13,76.672,rs2329151,0.005  
13,76.692,rs3910572,0.007  
13,76.741,rs2329153,0.017  
13,76.759,rs9318678,0.017  
13,76.763,rs8001641,0.017  
13,76.835,rs518569,0.015  
13,76.842,rs9574595,0.015  
13,76.867,rs9574602,0.015  
13,76.882,rs7992472,0.016  
13,76.888,rs9574614,0.017  
13,76.893,rs9531036,0.017  
13,77.006,rs11840723,0.029  
13,77.201,rs7321702,0.057  
13,77.213,rs1772587,0.059  
13,77.218,rs1622512,0.059  
13,77.327,rs7327912,0.058  
13,77.404,rs7336590,0.050  
13,77.462,rs1360632,0.045  
13,77.480,rs9318729,0.045  
13,77.499,rs1855259,0.057  
13,77.512,rs2329177,0.058  
13,77.546,rs9545617,0.047  
13,77.614,rs1146978,0.055  
13,77.626,rs9318765,0.056  
13,77.699,rs6563216,0.066  
13,77.726,rs9545770,0.066

13,77.781,rs1490022,0.055  
13,77.791,rs2151504,0.052  
13,77.815,rs1602204,0.043  
13,77.852,rs1336741,0.033  
13,77.854,rs9531268,0.032  
13,77.865,rs7332524,0.031  
13,77.885,rs2173141,0.029  
13,77.898,rs9601838,0.030  
13,77.945,rs7984003,0.033  
13,78.015,rs9318882,0.040  
13,78.025,rs9546178,0.039  
13,78.044,rs1984087,0.039  
13,78.068,rs7319735,0.039  
13,78.149,rs7992515,0.036  
13,78.460,rs985035,0.024  
13,78.642,rs9593836,0.045  
13,78.688,rs1413854,0.053  
13,78.754,rs4255684,0.064  
13,78.780,rs7992606,0.068  
13,78.783,rs1446756,0.084  
13,78.850,rs7491993,0.081  
13,78.859,rs2204502,0.081  
13,78.946,rs4911044,0.070  
13,78.952,rs9546985,0.070  
13,78.966,rs17079019,0.067  
13,78.992,rs7336296,0.062  
13,79.075,rs2497410,0.046  
13,79.086,rs2497421,0.043  
13,79.101,rs4911070,0.032  
13,79.124,rs4349048,0.030  
13,79.138,rs7318579,0.031  
13,79.200,rs1928141,0.025  
13,79.244,rs1764970,0.023  
13,79.269,rs1337278,0.024  
13,79.293,rs431057,0.029  
13,79.344,rs9602954,0.033  
13,79.351,rs1981084,0.022  
13,79.445,rs9514373,0.025  
13,79.456,rs1939662,0.026  
13,79.460,rs7337110,0.031  
13,79.464,rs4772827,0.037  
13,79.505,rs17650176,0.044  
13,79.519,rs9518594,0.047  
13,79.543,rs1502069,0.043  
13,79.597,rs2880005,0.043  
13,79.732,rs9523416,0.044  
13,79.915,rs9525064,0.043  
13,79.949,rs11619733,0.042  
13,79.991,rs7999681,0.041  
13,80.013,rs10507966,0.040  
13,80.048,rs9582262,0.034  
13,80.053,rs9517479,0.034  
13,80.066,rs1414011,0.033  
13,80.093,rs4540935,0.040  
13,80.111,rs2992104,0.046  
13,80.115,rs10507969,0.047  
13,80.120,rs10507970,0.048  
13,80.174,rs7987189,0.053  
13,80.238,rs12866357,0.066  
13,80.406,rs1413279,0.107  
13,80.604,rs2018070,0.126

13,80.681,rs7328476,0.104  
13,80.809,rs1120556,0.099  
13,80.905,rs4366591,0.111  
13,80.940,rs1536355,0.115  
13,80.979,rs9521631,0.119  
13,81.123,rs9522205,0.116  
13,81.490,rs9588534,0.111  
13,81.572,rs17712596,0.109  
13,81.619,rs1041378,0.110  
13,81.781,rs9555880,0.148  
13,81.810,rs1159195,0.156  
13,81.837,rs3736408,0.157  
13,81.868,rs1504432,0.157  
13,82.011,rs7329978,0.137  
13,82.062,rs9515642,0.130  
13,82.064,rs16943501,0.129  
13,82.065,rs1932298,0.129  
13,82.067,rs9560478,0.135  
13,82.072,rs2349953,0.179  
13,82.151,rs1341647,0.209  
13,82.181,rs1491030,0.221  
13,82.225,rs2805646,0.236  
13,82.331,rs4773558,0.240  
13,82.408,rs7328705,0.272  
13,82.420,rs9515710,0.273  
13,82.562,rs7984044,0.356  
13,82.567,rs9556015,0.344  
13,82.573,rs997715,0.326  
13,82.588,rs7997970,0.320  
13,82.670,rs9560635,0.299  
13,82.787,rs7338038,0.240  
13,82.821,rs9523030,0.223  
13,82.845,rs1572962,0.221  
13,82.924,rs828246,0.230  
13,82.972,rs13378922,0.231  
13,82.978,rs9523062,0.231  
13,83.098,rs16944919,0.234  
13,83.314,rs9523247,0.238  
13,83.332,rs898271,0.237  
13,83.355,rs9301708,0.235  
13,83.387,rs7324853,0.232  
13,83.612,rs9523299,0.199  
13,83.649,rs9523304,0.206  
13,83.793,rs9989098,0.194  
13,83.797,rs9560797,0.193  
13,83.820,rs534212,0.194  
13,83.827,rs4771834,0.194  
13,83.848,rs9523342,0.193  
13,83.999,rs7995778,0.192  
13,84.023,rs725040,0.200  
13,84.106,rs342693,0.204  
13,84.192,rs7984514,0.193  
13,84.285,rs2352538,0.221  
13,84.330,rs7986588,0.227  
13,84.355,rs9560935,0.232  
13,84.359,rs4773668,0.229  
13,84.389,rs6492591,0.170  
13,84.407,rs7987675,0.174  
13,84.486,rs9561023,0.199  
13,84.490,rs7326944,0.198  
13,84.517,rs7994262,0.193

13,84.575,rs9584035,0.165  
13,84.605,rs7319083,0.151  
13,84.620,rs9589601,0.145  
13,84.635,rs1333672,0.147  
13,84.646,rs9523752,0.142  
13,84.958,rs1326107,0.116  
13,85.647,rs319514,0.141  
13,85.856,rs319533,0.174  
13,86.012,rs16948469,0.150  
13,86.136,rs1328368,0.129  
13,86.209,rs1323998,0.152  
13,86.658,rs7992272,0.189  
13,86.680,rs9301881,0.190  
13,86.726,rs970263,0.195  
13,86.758,rs9561361,0.199  
13,86.767,rs12586008,0.200  
13,86.968,rs9584127,0.245  
13,86.979,rs1445253,0.217  
13,87.061,rs1037072,0.227  
13,87.062,rs9561405,0.225  
13,87.094,rs7983396,0.190  
13,87.412,rs4301888,0.159  
13,87.495,rs4771880,0.151  
13,87.798,rs12427786,0.166  
13,87.988,rs12855484,0.173  
13,88.385,rs1536780,0.142  
13,88.513,rs7322047,0.136  
13,88.555,rs595509,0.134  
13,88.607,rs680323,0.136  
13,88.671,rs7991937,0.157  
13,88.718,rs9589923,0.126  
13,88.738,rs9524362,0.090  
13,88.750,rs7321299,0.069  
13,88.770,rs7330788,0.021  
13,88.774,rs9524681,0.017  
13,88.800,rs1925856,0.006  
13,88.813,rs2148065,0.004  
13,88.863,rs7324065,0.002  
13,88.866,rs1750190,0.001  
13,88.882,rs943290,0.003  
13,88.915,rs1564355,0.008  
13,88.919,rs1729741,0.016  
13,88.920,rs2766482,0.020  
13,88.945,rs9561797,0.040  
13,88.958,rs3843689,0.055  
13,88.963,rs2487566,0.065  
13,88.996,rs9524860,0.049  
13,89.010,rs7325861,0.050  
13,89.039,rs8001444,0.060  
13,89.048,rs2993590,0.064  
13,89.061,rs8001940,0.069  
13,89.098,rs7982352,0.083  
13,89.134,rs7333503,0.092  
13,89.156,rs3898012,0.099  
13,89.164,rs7984974,0.102  
13,89.167,rs9584312,0.080  
13,89.320,rs7324577,0.086  
13,90.231,rs9562057,0.129  
13,90.435,rs11069237,0.131  
13,90.582,rs1164591,0.117  
13,91.037,rs12864425,0.165



13,91.103,rs1924584,0.163  
13,91.359,rs9516774,0.127  
13,91.481,rs9554374,0.142  
13,91.643,rs9516806,0.170  
13,91.757,rs1847022,0.178  
13,91.787,rs8000030,0.180  
13,92.088,rs1999088,0.195  
13,92.106,rs9516890,0.196  
13,92.155,rs12019957,0.196  
13,92.274,rs1806507,0.223  
13,92.587,rs12870589,0.201  
13,92.667,rs9300430,0.147  
13,92.737,rs1318759,0.145  
13,92.884,rs2096050,0.098  
13,92.897,rs2792969,0.099  
13,93.014,rs9513309,0.104  
13,93.022,rs9584692,0.103  
13,93.068,rs4771286,0.098  
13,93.075,rs1415707,0.097  
13,93.184,rs7996672,0.141  
13,93.240,rs7329817,0.146  
13,93.473,rs631618,0.160  
13,93.490,rs285055,0.165  
13,93.540,rs7328138,0.155  
13,93.556,rs12871665,0.146  
13,93.570,rs602626,0.108  
13,93.571,rs9513353,0.107  
13,93.609,rs9634510,0.101  
13,93.614,rs285083,0.102  
13,93.636,rs7317340,0.103  
13,93.667,rs285100,0.114  
13,93.731,rs4772049,0.103  
13,93.740,rs285107,0.100  
13,93.798,rs7318267,0.110  
13,93.823,rs9517237,0.086  
13,93.826,rs7997235,0.081  
13,93.847,rs17455303,0.052  
13,93.872,rs679363,0.035  
13,93.891,rs9556929,0.036  
13,93.896,rs2390038,0.046  
13,93.966,rs2127779,0.026  
13,93.986,rs587377,0.022  
13,93.986,rs586538,0.022  
13,94.014,rs2772354,0.022  
13,94.038,rs3783015,0.019  
13,94.061,rs11616605,0.011  
13,94.072,rs7981744,0.008  
13,94.078,rs9584843,0.006  
13,94.084,rs3825435,0.005  
13,94.089,rs7333410,0.005  
13,94.091,rs9584845,0.004  
13,94.097,rs998733,0.001  
13,94.150,rs12858868,0.000  
13,94.222,rs9556966,-0.000  
13,94.322,rs4772102,0.000  
13,94.342,rs7139717,0.000  
13,94.373,rs4771308,0.001  
13,94.386,rs4771309,0.003  
13,94.514,rs6491441,0.014  
13,94.566,rs9513475,0.020  
13,94.578,rs3782997,0.026

13,94.616,rs1543668,0.026  
13,94.646,rs12427885,0.026  
13,94.855,rs11617918,0.018  
13,94.924,rs11843068,0.019  
13,95.387,rs9554579,0.003  
13,95.595,rs6491503,0.001  
13,95.671,rs9517767,0.001  
13,95.676,rs12584161,0.001  
13,95.695,rs9517783,0.001  
13,95.791,rs2806283,0.001  
13,95.816,rs6491526,0.001  
13,95.878,rs1105576,0.003  
13,96.000,rs1000022,0.008  
13,96.004,rs7332098,0.008  
13,96.012,rs2806295,0.007  
13,96.032,rs1028710,0.009  
13,96.049,rs17612107,0.009  
13,96.073,rs7331804,0.007  
13,96.084,rs7333886,0.006  
13,96.120,rs7317678,0.004  
13,96.177,rs7986370,0.004  
13,96.192,rs7988924,0.004  
13,96.193,rs17578011,0.004  
13,96.268,rs13542,0.012  
13,96.375,rs1433228,0.012  
13,96.484,rs1890139,0.012  
13,96.538,rs2152881,0.012  
13,96.778,rs16957301,0.009  
13,96.957,rs1407761,0.013  
13,97.157,rs9518097,0.014  
13,97.204,rs8002073,0.015  
13,97.297,rs9518128,0.014  
13,97.369,rs2786953,0.008  
13,97.382,rs4771370,0.008  
13,97.390,rs1711178,0.003  
13,97.408,rs746208,0.003  
13,97.510,rs12428596,0.001  
13,97.558,rs9518182,0.002  
13,97.563,rs9585528,0.001  
13,97.605,rs4772336,0.000  
13,97.663,rs3886776,0.000  
13,97.673,rs9585548,0.000  
13,97.676,rs2104452,0.000  
13,97.712,rs9513824,-0.000  
13,97.725,rs2803212,0.000  
13,97.729,rs2765330,0.000  
13,97.805,rs9585585,0.001  
13,97.813,rs2803224,0.001  
13,97.832,rs2803218,-0.001  
13,97.872,rs3751405,-0.003  
13,97.899,rs1289556,-0.010  
13,97.906,rs671167,-0.011  
13,97.952,rs9300647,-0.017  
13,97.962,rs640960,-0.020  
13,97.968,rs583546,-0.020  
13,97.980,rs9585626,-0.020  
13,98.012,rs660622,-0.020  
13,98.036,rs13378735,-0.019  
13,98.042,rs680711,-0.027  
13,98.183,rs7335296,-0.023  
13,98.197,rs4772363,-0.023

13,98.227,rs9518364,-0.030  
13,98.398,rs8000376,-0.017  
13,98.471,rs7998783,-0.030  
13,98.473,rs9300677,-0.030  
13,98.476,rs3783210,-0.035  
13,98.477,rs16959194,-0.038  
13,98.478,rs7986646,-0.035  
13,98.478,rs2217903,-0.033  
13,98.478,rs1975266,-0.033  
13,98.478,rs9585750,-0.034  
13,98.480,rs9300690,-0.027  
13,98.524,rs4558266,-0.024  
13,98.538,rs9582522,-0.024  
13,98.594,rs913462,-0.022  
13,98.631,rs3007765,-0.022  
13,98.686,rs869802,-0.030  
13,98.743,rs2476227,-0.040  
13,98.743,rs9518600,-0.040  
13,98.862,rs4772437,-0.055  
13,98.919,rs7330977,-0.057  
13,98.949,rs652157,-0.051  
13,99.268,rs536863,-0.062  
13,99.407,rs7986923,-0.063  
13,99.730,rs1336714,-0.057  
13,99.758,rs9585881,-0.058  
13,99.957,rs1336661,-0.056  
13,100.221,rs12859468,-0.076  
13,100.224,rs7993414,-0.076  
13,100.507,rs3809373,-0.087  
13,100.806,rs9586004,-0.110  
13,100.831,rs9557947,-0.112  
13,100.867,rs7984853,-0.112  
13,100.934,rs9300766,-0.114  
13,101.310,rs4772523,-0.116  
13,101.373,rs1925978,-0.113  
13,101.489,rs3918333,-0.112  
13,101.808,rs1730642,-0.111  
13,101.809,rs1730643,-0.111  
13,101.823,rs9518947,-0.091  
13,102.028,rs2031046,-0.091  
13,102.054,rs16961766,-0.091  
13,102.290,rs1888323,-0.096  
13,102.401,rs1330778,-0.115  
13,102.575,rs10220273,-0.089  
13,102.635,rs9558063,-0.076  
13,102.657,rs1888322,-0.092  
13,102.700,rs7324647,-0.093  
13,102.726,rs673358,-0.095  
13,102.764,rs2065550,-0.097  
13,102.880,rs16962524,-0.101  
13,102.927,rs9300822,-0.102  
13,103.378,rs7317234,-0.064  
13,103.595,rs9586243,-0.050  
13,103.646,rs1341439,-0.044  
13,103.731,rs1274749,-0.047  
13,103.748,rs16963224,-0.047  
13,103.784,rs1537197,-0.047  
13,103.817,rs1361576,-0.047  
13,104.005,rs1336609,-0.040  
13,104.145,rs3916938,-0.038  
13,104.223,rs2390998,-0.038

13,104.326,rs12184606,-0.037  
13,104.330,rs9519177,-0.037  
13,104.440,rs4772597,-0.024  
13,104.488,rs1913208,-0.019  
13,104.510,rs9558241,-0.021  
13,104.517,rs713607,-0.026  
13,104.525,rs4772604,-0.032  
13,104.564,rs907729,-0.034  
13,104.594,rs9558257,-0.035  
13,105.371,rs7323636,-0.037  
13,105.472,rs9300917,-0.036  
13,105.546,rs9519308,-0.036  
13,105.840,rs9586513,-0.026  
13,106.050,rs7981507,-0.020  
13,106.148,rs11841281,-0.019  
13,106.250,rs2391128,-0.018  
13,106.389,rs9555079,-0.016  
13,106.642,rs11838415,-0.013  
13,106.647,rs798880,-0.013  
13,106.679,rs701565,-0.015  
13,106.739,rs11841526,-0.017  
13,106.877,rs754394,-0.009  
13,106.937,rs7331363,-0.007  
13,107.063,rs323450,-0.000  
13,107.215,rs7320588,-0.001  
13,107.240,rs9519494,0.000  
13,107.440,rs9919881,0.001  
13,107.498,rs7320561,0.001  
13,107.660,rs1536360,0.004  
13,107.678,rs7996230,0.005  
13,107.720,rs9300983,0.009  
13,107.883,rs3007246,0.023  
13,107.956,rs3015345,0.029  
13,107.999,rs3007290,0.032  
13,108.001,rs3015356,0.032  
13,108.010,rs3015359,0.032  
13,108.067,rs12430622,0.031  
13,108.082,rs4771493,0.031  
13,108.139,rs7981764,0.031  
13,108.181,rs1324750,0.038  
13,108.197,rs12859775,0.041  
13,108.201,rs9514379,0.040  
13,108.211,rs732442,0.046  
13,108.281,rs9519650,0.040  
13,108.308,rs3916962,0.044  
13,108.399,rs9558552,0.064  
13,108.487,rs701567,0.098  
13,108.505,rs954580,0.102  
13,108.514,rs9583006,0.103  
13,108.569,rs9519707,0.110  
13,108.633,rs4441130,0.109  
13,108.684,rs3916972,0.107  
13,108.708,rs1421296,0.082  
13,108.765,rs16967019,0.056  
13,108.943,rs9555193,0.018  
13,108.948,rs3899559,0.017  
13,108.964,rs2149145,0.017  
13,108.979,rs10508164,0.020  
13,109.026,rs1328094,0.027  
13,109.119,rs7981276,0.049  
13,109.167,rs9555200,0.056

13,109.193,rs9301077,0.053  
13,109.253,rs4772723,0.060  
13,109.290,rs4772725,0.089  
13,109.326,rs11841251,0.091  
13,109.348,rs7319510,0.091  
13,109.360,rs9558651,0.089  
13,109.389,rs470422,0.085  
13,109.481,rs9519894,0.078  
13,109.710,rs4772736,0.070  
13,109.758,rs9558671,0.069  
13,109.863,rs16968126,0.068  
13,109.890,rs9519937,0.067  
13,109.987,rs7338655,0.063  
13,110.026,rs17522272,0.067  
13,110.057,rs9558678,0.085  
13,110.135,rs11616330,0.092  
13,110.148,rs1978944,0.093  
13,110.287,rs12868856,0.098  
13,110.467,rs9519971,0.104  
13,110.546,rs9284233,0.106  
13,110.587,rs9555233,0.106  
13,111.466,rs4772774,0.117  
13,111.623,rs2169659,0.126  
13,111.776,rs4771529,0.109  
13,111.955,rs4238247,0.092  
13,112.032,rs911997,0.087  
13,112.061,rs16968691,0.086  
13,112.114,rs2391298,0.085  
13,112.192,rs1407584,0.104  
13,112.198,rs7322914,0.103  
13,112.346,rs9520092,0.097  
13,112.381,rs2391340,0.095  
13,112.415,rs8000078,0.096  
13,112.751,rs2391345,0.116  
13,112.882,rs9520124,0.110  
13,112.897,rs2391352,0.106  
13,112.953,rs7992345,0.101  
13,112.963,rs9520129,0.100  
13,113.140,rs951749,0.062  
13,113.156,rs6492031,0.059  
13,113.197,rs8002967,0.056  
13,113.309,rs9587240,0.043  
13,113.398,rs1485626,0.038  
13,113.451,rs9301172,0.030  
13,113.480,rs12429879,0.028  
13,113.591,rs7333889,0.020  
13,113.624,rs9301178,0.018  
13,113.644,rs4509878,0.017  
13,113.852,rs2806508,0.027  
13,113.864,rs2806510,0.028  
13,113.892,rs2769917,0.030  
13,113.909,rs2806518,0.030  
13,113.919,rs2182958,0.029  
13,113.947,rs2769924,0.030  
13,113.951,rs10508183,0.030  
13,113.974,rs4771555,0.031  
13,114.008,rs9514629,0.038  
13,114.055,rs7993272,0.066  
13,114.056,rs16952130,0.066  
13,114.081,rs4772864,0.071  
13,114.215,rs1022876,0.060

13,114.262,rs9559025,0.066  
13,114.283,rs4444189,0.077  
13,114.334,rs7998513,0.090  
13,114.390,rs7320409,0.100  
13,114.407,rs16970118,0.097  
13,114.476,rs10492715,0.074  
13,114.528,rs977719,0.066  
13,114.550,rs16970558,0.065  
13,114.580,rs2809285,0.063  
13,114.659,rs1998564,0.046  
13,114.671,rs7998212,0.046  
13,114.719,rs1886228,0.051  
13,114.805,rs9587423,0.052  
13,114.837,rs3858799,0.038  
13,114.956,rs9520569,0.026  
13,115.039,rs9520584,0.016  
13,115.049,rs7990930,0.015  
13,115.100,rs9520594,0.008  
13,115.109,rs7988858,0.007  
13,115.144,rs816995,0.007  
13,115.161,rs1771138,0.007  
13,115.234,rs7322238,0.005  
13,115.432,rs12871532,0.005  
13,115.454,rs7985095,0.004  
13,115.466,rs16971732,0.003  
13,115.473,rs9559215,0.003  
13,115.493,rs9587495,0.002  
13,115.503,rs4325412,0.004  
13,115.543,rs16971810,0.019  
13,115.546,rs12874612,0.020  
13,115.603,rs7987249,0.031  
13,115.637,rs9520800,0.036  
13,115.697,rs16972078,0.054  
13,115.701,rs8002852,0.054  
13,115.725,rs9514823,0.036  
13,115.780,rs1805388,0.028  
13,115.867,rs2582869,0.035  
13,115.909,rs1224141,0.029  
13,116.006,rs766106,0.024  
13,116.028,rs11069734,0.025  
13,116.037,rs9559307,0.025  
13,116.185,rs4772971,0.022  
13,116.226,rs16972513,0.021  
13,116.232,rs1951896,0.021  
13,116.307,rs2391644,0.018  
13,116.545,rs4772979,0.008  
13,116.636,rs12858695,0.008  
13,116.736,rs7321197,0.005  
13,116.927,rs9583277,0.000  
13,117.016,rs4772988,0.001  
13,117.020,rs1887124,0.003  
13,117.032,rs9555495,0.003  
13,117.287,rs1022801,0.000  
13,117.342,rs984300,-0.000  
13,117.493,rs1856282,-0.000  
13,117.501,rs9301328,-0.000  
13,117.559,rs196166,-0.002  
13,117.701,rs9521095,0.000  
13,117.849,rs9587731,0.000  
13,117.959,rs277796,0.000  
13,117.979,rs3858816,-0.000

13,117.990,rs1929293,-0.000  
13,118.124,rs9514966,0.000  
13,118.132,rs1431273,0.000  
13,118.207,rs277836,0.001  
13,118.300,rs4771625,0.000  
13,118.353,rs157000,0.000  
13,118.499,rs275946,-0.001  
13,118.548,rs9521192,-0.003  
13,118.597,rs594348,-0.013  
13,118.620,rs1028724,-0.015  
13,118.732,rs7992004,-0.011  
13,118.845,rs9634469,-0.008  
13,118.857,rs8002089,-0.007  
13,118.960,rs9555576,-0.006  
13,119.249,rs7325702,-0.010  
13,119.405,rs9555607,-0.017  
13,119.423,rs1328238,-0.018  
13,119.462,rs1410418,-0.022  
13,119.589,rs9521382,-0.023  
13,119.781,rs6492204,-0.034  
13,119.829,rs1576166,-0.028  
13,119.921,rs4771635,-0.016  
13,119.923,rs10492479,-0.015  
13,119.965,rs16974374,-0.009  
13,120.177,rs331622,0.002  
13,120.242,rs9515094,0.007  
13,120.273,rs331974,0.003  
13,120.344,rs331985,0.003  
13,120.348,rs2076915,0.003  
13,120.389,rs2391784,0.011  
13,120.392,rs2164172,0.011  
13,120.408,rs3910315,0.014  
13,120.614,rs12584136,0.016  
13,120.621,rs9521509,0.016  
13,120.943,rs336224,0.021  
13,121.000,rs336214,0.021  
13,121.007,rs1414320,0.030  
13,121.052,rs9515125,0.019  
13,121.399,rs4773106,0.010  
13,121.447,rs12429959,0.017  
13,121.509,rs4773112,0.015  
13,121.627,rs4503663,0.018  
13,121.759,rs2391812,0.018  
13,121.883,rs7319307,0.012  
13,121.928,rs1192201,0.004  
13,121.930,rs3825481,0.003  
13,121.953,rs1133219,0.001  
13,121.970,rs3742207,0.001  
13,121.974,rs1470428,0.001  
13,121.981,rs12868126,0.001  
13,122.060,rs1143914,0.000  
13,122.064,rs9515168,-0.001  
13,122.067,rs3783101,-0.001  
13,122.071,rs9301436,-0.001  
13,122.118,rs4145072,0.002  
13,122.124,rs72509,0.003  
13,122.149,rs903352,0.009  
13,122.182,rs561437,0.015  
13,122.209,rs9301445,0.016  
13,122.226,rs2391824,0.022  
13,122.243,rs4773155,0.057

13,122.269,rs1556122,0.069  
13,122.322,rs872587,0.092  
13,122.439,rs4512966,0.072  
13,122.452,rs4255644,0.083  
13,122.476,rs9555701,0.076  
13,122.517,rs4773191,0.064  
13,122.562,rs9555714,0.051  
13,122.574,rs445348,0.049  
13,122.575,rs387298,0.049  
13,122.602,rs7327721,0.049  
13,122.653,rs912943,0.049  
13,122.677,rs766974,0.045  
13,122.718,rs4773223,0.041  
13,122.724,rs9559849,0.040  
13,122.726,rs4773225,0.051  
13,122.861,rs4771705,0.041  
13,122.968,rs7999702,0.050  
13,123.018,rs3098728,0.043  
13,123.066,rs3858825,0.046  
13,123.085,rs328794,0.047  
13,123.118,rs328818,0.050  
13,123.180,rs4771711,0.064  
13,123.190,rs4771712,0.067  
13,123.240,rs6492325,0.069  
13,123.356,rs4500581,0.050  
13,123.423,rs9522040,0.050  
13,123.450,rs7996868,0.054  
13,123.472,rs8000668,0.055  
13,123.564,rs4771726,0.063  
13,123.648,rs4771732,0.062  
13,123.679,rs860520,0.063  
13,123.704,rs7998332,0.046  
13,124.393,rs1536051,0.050  
13,124.419,rs2477466,0.054  
13,124.490,rs2479960,0.060  
13,124.809,rs1164133,0.094  
13,124.847,rs1164128,0.079  
13,124.936,rs7336690,0.098  
13,124.955,rs9588431,0.092  
13,124.974,rs9588435,0.083  
13,125.039,rs9515423,0.081  
13,125.179,rs1151440,0.064  
13,125.239,rs997702,0.063  
13,125.263,rs1151455,0.067  
13,125.305,rs1888306,0.071  
13,125.333,rs1571625,0.071  
13,125.407,rs9522264,0.075  
13,125.567,rs9555818,0.075  
13,125.586,rs7335928,0.076  
13,125.781,rs1105513,0.080  
13,125.821,rs7989477,0.064  
13,126.285,rs4293272,0.086  
13,126.329,rs4362282,0.080  
13,126.468,rs2146439,0.061  
13,126.558,rs9550223,0.046  
13,126.697,rs9549384,0.035  
13,126.839,rs942335,0.029  
13,126.964,rs11164144,0.029  
13,126.987,rs7995146,0.025  
13,127.023,rs2196579,0.023  
13,127.066,rs7991981,0.018



13,127.076,rs9549854,0.014  
13,127.112,rs9324262,0.015  
13,127.190,rs9577637,0.028  
13,127.262,rs928194,0.032  
13,127.278,rs7322849,0.029  
13,127.307,rs2183443,0.021  
13,127.479,rs9549948,0.022  
13,127.718,rs4611350,0.022  
13,127.793,rs1928940,0.021  
13,127.873,rs1109306,0.020  
13,127.934,rs750989,0.019  
13,127.970,rs4907715,0.018  
13,127.972,rs9550097,0.018  
13,128.099,rs2274574,0.023  
13,128.387,rs1952109,0.038  
13,128.433,rs7323548,0.044  
13,128.438,rs942919,0.045  
13,128.539,rs6577102,0.102  
13,128.564,rs1571621,0.104  
13,128.590,rs7328960,0.104  
13,128.602,rs7338610,0.105  
13,128.780,rs17763986,0.097  
13,128.837,rs9549575,0.109  
13,128.851,rs945972,0.109  
13,128.910,rs4907561,0.101  
13,128.929,rs1933199,0.074  
13,128.967,rs7998446,0.045  
13,129.000,rs2993285,0.043  
13,129.056,rs2993305,0.033  
13,129.097,rs9577451,0.029  
13,129.132,rs527264,0.027  
13,129.149,rs2146752,0.021  
13,129.186,rs3211719,0.011  
13,129.189,rs556694,0.011  
13,129.287,rs3751411,0.014  
13,129.368,rs3814258,0.008  
13,129.409,rs1078712,0.005  
13,129.440,rs12871648,0.003  
13,129.510,rs4907623,0.000  
13,129.572,rs7989816,-0.000  
13,129.584,rs7991325,-0.000  
13,129.592,rs9549790,-0.000  
13,129.687,rs9805651,0.001  
13,129.827,rs4150724,0.004  
13,129.877,rs12875059,0.005  
13,129.905,rs9796234,0.000  
13,130.152,rs9604512,0.001  
13,130.202,rs7996080,0.001  
13,130.238,rs7323426,0.000  
13,130.255,rs11618091,0.000  
13,130.295,rs11259844,0.000  
13,130.629,rs9314891,-0.001  
13,130.685,rs7317882,-0.001  
13,130.866,rs7327124,-0.000  
13,130.914,rs3813131,-0.000  
14,9.350,rs1972372,-0.727  
14,9.367,rs2792162,-0.726  
14,9.519,rs3939209,-0.647  
14,9.806,rs11850259,-0.718  
14,9.907,rs1953553,-0.722  
14,9.939,rs4981088,-0.723

14,9.980,rs6574474,-0.724  
14,10.323,rs11851081,-0.705  
14,10.325,rs8010116,-0.705  
14,10.703,rs3784244,-0.648  
14,11.168,rs1713456,-0.707  
14,11.254,rs2945461,-0.707  
14,11.320,rs1760898,-0.711  
14,11.342,rs1760897,-0.712  
14,11.472,rs945012,-0.720  
14,11.527,rs8017603,-0.716  
14,11.636,rs2275007,-0.706  
14,11.701,rs1760941,-0.682  
14,11.725,rs1713460,-0.717  
14,11.846,rs10498268,-0.723  
14,11.868,rs1760930,-0.766  
14,11.869,rs13379232,-0.767  
14,11.887,rs4981209,-0.821  
14,11.901,rs7161172,-0.761  
14,11.952,rs4982140,-0.850  
14,12.149,rs12586536,-0.837  
14,12.191,rs1243706,-0.843  
14,12.195,rs1243705,-0.835  
14,12.209,rs1243701,-0.834  
14,12.231,rs1243698,-0.833  
14,12.284,rs10498269,-0.819  
14,12.457,rs1243631,-0.824  
14,12.509,rs1243600,-0.797  
14,12.557,rs4981259,-0.745  
14,12.750,rs1243665,-0.675  
14,12.793,rs1243679,-0.684  
14,12.826,rs1243685,-0.685  
14,13.002,rs8003288,-0.697  
14,13.039,rs750142,-0.708  
14,13.205,rs8004382,-0.869  
14,13.277,rs17211649,-0.819  
14,13.347,rs1320482,-0.803  
14,13.410,rs4982347,-0.793  
14,13.439,rs2771324,-0.780  
14,13.619,rs2771354,-0.517  
14,13.695,rs1243459,-0.409  
14,13.721,rs1261795,-0.377  
14,13.752,rs1958032,-0.365  
14,13.771,rs4982394,-0.331  
14,13.818,rs4982401,-0.291  
14,13.858,rs1952151,-0.262  
14,13.995,rs4982411,-0.206  
14,14.041,rs10141637,-0.189  
14,14.046,rs9671842,-0.214  
14,14.052,rs943994,-0.185  
14,14.119,rs12893005,-0.261  
14,14.186,rs1887063,-0.202  
14,14.214,rs2319682,-0.175  
14,14.343,rs8006593,-0.111  
14,14.377,rs1243370,-0.107  
14,14.377,rs17102539,-0.107  
14,14.705,rs8009098,-0.086  
14,14.716,rs4982440,-0.086  
14,14.741,rs11848323,-0.073  
14,14.844,rs11628702,-0.079  
14,14.886,rs1263806,-0.070  
14,14.889,rs7148594,-0.072

14,14.892,rs3177954,-0.074  
14,14.895,rs1263811,-0.093  
14,14.896,rs2242529,-0.102  
14,14.902,rs2031063,-0.102  
14,14.909,rs1041856,-0.099  
14,14.932,rs4982462,-0.074  
14,14.939,rs10136774,-0.069  
14,14.965,rs13379427,-0.085  
14,14.978,rs12434436,-0.084  
14,15.007,rs8021892,-0.077  
14,15.016,rs6571990,-0.073  
14,15.081,rs4982495,-0.060  
14,15.082,rs12434054,-0.060  
14,15.153,rs2204955,-0.061  
14,15.210,rs733290,-0.044  
14,15.253,rs1040297,-0.045  
14,15.288,rs3811327,-0.053  
14,15.296,rs3827932,-0.042  
14,15.341,rs3811302,-0.050  
14,15.341,rs4982548,-0.051  
14,15.363,rs17183131,-0.050  
14,15.386,rs2178785,-0.049  
14,15.387,rs2272550,-0.049  
14,15.404,rs8016767,-0.062  
14,15.431,rs933193,-0.091  
14,15.610,rs2075496,-0.093  
14,15.696,rs6572331,-0.091  
14,15.796,rs9972232,-0.082  
14,15.877,rs10129606,-0.071  
14,15.916,rs12588739,-0.065  
14,15.927,rs722448,-0.063  
14,15.961,rs1540268,-0.051  
14,16.431,rs760019,-0.089  
14,16.689,rs2293732,-0.104  
14,16.691,rs1076861,-0.104  
14,16.740,rs227867,-0.111  
14,16.765,rs3751467,-0.103  
14,16.824,rs6572493,-0.101  
14,16.848,rs226999,-0.114  
14,16.849,rs1483973,-0.114  
14,16.856,rs12887424,-0.118  
14,17.029,rs438538,-0.108  
14,17.032,rs15795,-0.108  
14,17.037,rs1263663,-0.090  
14,17.277,rs1242927,-0.116  
14,17.353,rs6572605,-0.128  
14,17.391,rs1753430,-0.115  
14,17.641,rs7140697,-0.116  
14,17.945,rs873922,-0.125  
14,17.974,rs8572,-0.124  
14,18.009,rs12891079,-0.127  
14,18.019,rs17122346,-0.127  
14,18.022,rs4981439,-0.127  
14,18.023,rs8013531,-0.128  
14,18.025,rs1805061,-0.127  
14,18.030,rs11568429,-0.124  
14,18.034,rs7151065,-0.132  
14,18.183,rs2281678,-0.174  
14,18.201,rs7150444,-0.169  
14,18.248,rs3811188,-0.156  
14,18.493,rs8021159,-0.181

14,18.550,rs2295682,-0.190  
14,18.721,rs11543947,-0.214  
14,18.750,rs2295689,-0.211  
14,18.811,rs3751501,-0.210  
14,18.811,rs1885097,-0.210  
14,18.849,rs9972278,-0.211  
14,18.889,rs2239633,-0.217  
14,18.892,rs3759608,-0.218  
14,18.925,rs1015089,-0.195  
14,18.938,rs2331937,-0.191  
14,18.988,rs8013529,-0.175  
14,18.995,rs1884544,-0.173  
14,19.001,rs4982740,-0.170  
14,19.056,rs977870,-0.161  
14,19.104,rs1950252,-0.147  
14,19.172,rs8006357,-0.126  
14,19.179,rs365990,-0.123  
14,19.198,rs17794387,-0.098  
14,19.225,rs7149564,-0.078  
14,19.293,rs222674,-0.071  
14,19.294,rs12894083,-0.071  
14,19.317,rs3783439,-0.096  
14,19.334,rs12897422,-0.084  
14,19.358,rs222732,-0.074  
14,19.387,rs222717,-0.092  
14,19.408,rs17199254,-0.114  
14,19.410,rs17199261,-0.115  
14,19.454,rs2118499,-0.159  
14,19.482,rs12890058,-0.179  
14,19.516,rs9323367,-0.184  
14,19.533,rs10483282,-0.243  
14,19.576,rs10139382,-0.233  
14,19.582,rs7142855,-0.231  
14,19.665,rs12887581,-0.236  
14,19.668,rs8003627,-0.237  
14,19.759,rs4982851,-0.241  
14,19.765,rs10146906,-0.243  
14,19.769,rs2070344,-0.243  
14,19.778,rs3561,-0.243  
14,19.819,rs973639,-0.243  
14,19.972,rs2295322,-0.230  
14,20.049,rs2748516,-0.203  
14,20.144,rs17184682,-0.169  
14,20.226,rs3742517,-0.152  
14,20.280,rs8017377,-0.141  
14,20.286,rs3814811,-0.117  
14,20.287,rs13841,-0.134  
14,20.287,rs14076,-0.134  
14,20.311,rs10134603,-0.106  
14,20.368,rs17200068,-0.083  
14,20.607,rs8192920,-0.059  
14,20.682,rs8021801,-0.061  
14,20.777,rs10142572,-0.069  
14,20.778,rs1461650,-0.069  
14,20.845,rs17795538,-0.064  
14,20.872,rs7161311,-0.061  
14,20.923,rs854392,-0.062  
14,21.005,rs854324,-0.062  
14,21.087,rs3742523,-0.053  
14,21.239,rs2146918,-0.037  
14,21.285,rs11159001,-0.024

14,21.644,rs7147583,-0.018  
14,21.829,rs1241486,-0.013  
14,21.870,rs1241502,-0.012  
14,21.904,rs1241515,-0.011  
14,22.012,rs1551767,-0.009  
14,22.170,rs1461549,-0.005  
14,22.407,rs12885654,0.000  
14,22.432,rs941737,-0.000  
14,22.440,rs12437015,-0.000  
14,22.507,rs10483300,0.002  
14,22.513,rs7158255,0.002  
14,22.562,rs11159347,0.003  
14,22.578,rs1950427,0.003  
14,22.800,rs11159411,0.001  
14,22.815,rs1951054,0.001  
14,22.822,rs1956773,0.001  
14,22.878,rs7350731,0.001  
14,22.916,rs7146825,0.001  
14,22.917,rs2180818,0.001  
14,22.918,rs12434794,0.002  
14,22.923,rs10873327,0.002  
14,22.985,rs1951039,0.001  
14,23.334,rs12587685,-0.005  
14,23.375,rs17212261,-0.005  
14,23.413,rs1956613,-0.002  
14,23.422,rs7161376,-0.002  
14,23.425,rs10149378,-0.004  
14,23.425,rs1240986,-0.004  
14,23.426,rs1240988,-0.000  
14,23.435,rs12880493,0.000  
14,23.473,rs10147093,0.001  
14,23.494,rs17556380,0.001  
14,23.517,rs11621043,0.001  
14,23.561,rs12879388,0.001  
14,23.589,rs715042,0.000  
14,23.595,rs862966,0.001  
14,23.705,rs10150971,0.000  
14,23.756,rs2207243,0.002  
14,23.762,rs10139118,0.002  
14,23.799,rs7153823,0.001  
14,23.843,rs17567957,0.002  
14,23.848,rs17110787,0.002  
14,23.854,rs10483312,0.001  
14,23.906,rs962215,-0.000  
14,24.064,rs10133359,-0.008  
14,24.125,rs9323786,-0.017  
14,24.217,rs751401,-0.020  
14,24.222,rs1956496,-0.020  
14,24.230,rs10498286,-0.021  
14,24.234,rs7153926,-0.022  
14,24.273,rs10138090,-0.027  
14,24.298,rs10083361,-0.029  
14,24.298,rs1956828,-0.029  
14,24.300,rs11159983,-0.031  
14,24.308,rs990173,-0.037  
14,24.324,rs4127782,-0.033  
14,24.348,rs17095231,-0.029  
14,24.354,rs12433975,-0.028  
14,24.354,rs2019010,-0.038  
14,24.356,rs1950582,-0.037  
14,24.367,rs1951755,-0.031

14,24.369,rs8017862,-0.043  
14,24.375,rs2146628,-0.044  
14,24.392,rs1500447,-0.041  
14,24.394,rs1745722,-0.040  
14,24.407,rs2133829,-0.039  
14,24.407,rs2050528,-0.038  
14,24.411,rs202970,-0.039  
14,24.422,rs396419,-0.040  
14,24.441,rs1563526,-0.045  
14,24.488,rs2877847,-0.065  
14,24.568,rs4143693,-0.065  
14,24.630,rs17113241,-0.072  
14,24.647,rs10129626,-0.074  
14,24.648,rs11624431,-0.074  
14,24.697,rs2248160,-0.076  
14,24.699,rs1958748,-0.076  
14,24.721,rs17095485,-0.095  
14,24.823,rs17611471,-0.088  
14,24.867,rs9652408,-0.085  
14,24.945,rs2182035,-0.084  
14,25.056,rs1957950,-0.067  
14,25.223,rs1885147,-0.051  
14,25.247,rs2022715,-0.052  
14,25.255,rs11621151,-0.052  
14,25.279,rs7147576,-0.053  
14,25.322,rs8012543,-0.055  
14,25.384,rs1002750,-0.051  
14,25.406,rs723544,-0.048  
14,25.415,rs9671289,-0.049  
14,25.445,rs1955452,-0.054  
14,25.451,rs6576265,-0.054  
14,25.467,rs730195,-0.053  
14,25.782,rs1957478,-0.050  
14,25.888,rs12882217,-0.037  
14,25.960,rs1956228,-0.044  
14,26.226,rs4384523,-0.063  
14,26.312,rs1191571,-0.032  
14,26.361,rs1191555,-0.033  
14,26.411,rs17114947,-0.043  
14,26.432,rs1998355,-0.048  
14,26.547,rs6571317,-0.069  
14,26.778,rs17096078,-0.084  
14,26.847,rs8021375,-0.089  
14,27.074,rs12589992,-0.104  
14,27.110,rs2333660,-0.105  
14,27.581,rs1372050,-0.105  
14,27.817,rs9652310,-0.109  
14,27.848,rs1440985,-0.127  
14,27.860,rs417054,-0.127  
14,28.129,rs720761,-0.170  
14,28.141,rs17096362,-0.170  
14,28.150,rs10483380,-0.170  
14,28.170,rs12436395,-0.168  
14,28.230,rs7160082,-0.162  
14,28.242,rs1956980,-0.160  
14,28.351,rs765135,-0.146  
14,28.372,rs424964,-0.147  
14,28.779,rs7149414,-0.155  
14,28.783,rs179525,-0.159  
14,28.790,rs7159120,-0.188  
14,28.793,rs882270,-0.187

14,28.835,rs2819780,-0.170  
14,28.842,rs2213951,-0.171  
14,28.895,rs8007471,-0.214  
14,29.007,rs179660,-0.265  
14,29.066,rs2239580,-0.325  
14,29.082,rs10431648,-0.347  
14,29.350,rs2179932,-0.287  
14,29.673,rs4981820,-0.280  
14,30.789,rs1888576,-0.287  
14,31.348,rs7142881,-0.312  
14,31.610,rs4981115,-0.297  
14,32.217,rs10141540,-0.268  
14,32.347,rs1278881,-0.267  
14,32.401,rs1278911,-0.251  
14,32.413,rs1278918,-0.252  
14,32.451,rs2236532,-0.256  
14,32.480,rs4981938,-0.255  
14,32.516,rs1952966,-0.267  
14,32.587,rs7151842,-0.265  
14,32.658,rs1958912,-0.272  
14,32.778,rs17386030,-0.285  
14,32.831,rs17098491,-0.268  
14,32.833,rs1279002,-0.268  
14,33.243,rs4476082,-0.234  
14,33.311,rs17098557,-0.222  
14,33.487,rs7142879,-0.201  
14,33.665,rs1002822,-0.192  
14,33.694,rs2093577,-0.187  
14,33.759,rs17098767,-0.204  
14,33.862,rs1535541,-0.239  
14,33.887,rs7494316,-0.248  
14,33.896,rs7149078,-0.250  
14,33.913,rs942029,-0.248  
14,34.087,rs10135060,-0.244  
14,34.088,rs8014419,-0.244  
14,34.089,rs8015624,-0.244  
14,34.109,rs2383302,-0.245  
14,34.250,rs1111692,-0.248  
14,34.278,rs721538,-0.250  
14,34.318,rs2145584,-0.248  
14,34.367,rs8010040,-0.248  
14,34.557,rs8012268,-0.246  
14,34.559,rs11846766,-0.246  
14,34.794,rs3825753,-0.213  
14,35.022,rs1884622,-0.169  
14,35.123,rs17439529,-0.158  
14,35.194,rs2300830,-0.172  
14,35.259,rs1955505,-0.185  
14,35.347,rs11622943,-0.205  
14,35.472,rs1950213,-0.195  
14,35.540,rs4261436,-0.183  
14,35.681,rs1955490,-0.171  
14,35.787,rs10134619,-0.150  
14,35.800,rs4982022,-0.147  
14,35.815,rs6571572,-0.146  
14,35.844,rs1956007,-0.160  
14,36.055,rs2383414,-0.192  
14,36.058,rs10143478,-0.192  
14,36.174,rs7157953,-0.210  
14,36.302,rs8014371,-0.329  
14,36.372,rs12436002,-0.348

14,36.380,rs2383436,-0.367  
14,36.391,rs7145093,-0.351  
14,36.411,rs974002,-0.345  
14,36.427,rs8007241,-0.347  
14,36.428,rs10137028,-0.349  
14,36.430,rs1279312,-0.352  
14,36.437,rs7157155,-0.358  
14,36.459,rs11628634,-0.341  
14,36.476,rs1958005,-0.361  
14,36.487,rs912855,-0.375  
14,36.521,rs4982062,-0.378  
14,36.539,rs2768837,-0.378  
14,36.566,rs243308,-0.380  
14,36.619,rs1886781,-0.382  
14,36.843,rs1952302,-0.388  
14,36.874,rs1111533,-0.389  
14,37.075,rs1315141,-0.389  
14,37.077,rs7151675,-0.391  
14,37.110,rs2274512,-0.409  
14,37.118,rs1315131,-0.411  
14,37.165,rs1315128,-0.374  
14,37.256,rs1303470,-0.438  
14,37.361,rs17101124,-0.490  
14,37.372,rs8018440,-0.494  
14,37.383,rs12897109,-0.500  
14,37.386,rs10134359,-0.503  
14,37.397,rs1440197,-0.515  
14,37.414,rs7159209,-0.536  
14,37.419,rs1951383,-0.501  
14,37.510,rs10132198,-0.531  
14,37.513,rs4981194,-0.533  
14,37.650,rs3949783,-0.630  
14,37.664,rs4619305,-0.625  
14,37.673,rs7143076,-0.595  
14,37.692,rs10134006,-0.527  
14,37.699,rs2149833,-0.530  
14,37.867,rs7143066,-0.625  
14,37.922,rs8018599,-0.639  
14,37.946,rs871609,-0.657  
14,37.963,rs17408765,-0.759  
14,37.972,rs4283129,-0.762  
14,37.994,rs944086,-0.740  
14,38.029,rs17101778,-0.718  
14,38.037,rs8016849,-0.712  
14,38.073,rs8006749,-0.741  
14,38.120,rs8020167,-0.774  
14,38.121,rs797352,-0.802  
14,38.121,rs797351,-0.794  
14,38.122,rs4981220,-0.819  
14,38.123,rs4982145,-0.888  
14,38.124,rs712285,-0.904  
14,38.127,rs10148562,-0.904  
14,38.129,rs1244345,-0.903  
14,38.129,rs1244376,-0.902  
14,38.129,rs1431062,-0.900  
14,38.130,rs1244370,-0.907  
14,38.200,rs7148400,-1.037  
14,38.255,rs1712355,-1.123  
14,38.335,rs799664,-1.217  
14,38.559,rs7147346,-1.291  
14,39.217,rs8016947,-1.245



14,39.258,rs1951276,-1.254  
14,39.276,rs7152826,-1.236  
14,39.306,rs3138045,-1.168  
14,39.343,rs10483453,-1.140  
14,39.351,rs10140560,-1.134  
14,39.407,rs1185837,-1.079  
14,39.470,rs9322955,-1.080  
14,39.508,rs2274068,-1.087  
14,39.516,rs7155504,-1.090  
14,39.663,rs1169030,-1.127  
14,39.815,rs17103608,-1.167  
14,39.931,rs17103684,-1.247  
14,40.006,rs847499,-1.276  
14,40.012,rs12432424,-1.216  
14,40.134,rs7147401,-1.180  
14,40.396,rs2761336,-1.278  
14,40.401,rs2553571,-1.279  
14,40.404,rs2787431,-1.280  
14,40.427,rs8018390,-1.287  
14,40.511,rs1535722,-1.334  
14,40.623,rs12147399,-1.373  
14,40.675,rs10483465,-1.397  
14,40.724,rs12436124,-1.424  
14,40.828,rs1951167,-1.460  
14,40.963,rs2207533,-1.513  
14,41.014,rs2073241,-1.553  
14,41.049,rs17105005,-1.579  
14,41.052,rs1884217,-1.581  
14,41.087,rs2064546,-1.645  
14,41.092,rs1884219,-1.642  
14,41.109,rs8009041,-1.627  
14,41.142,rs1033594,-1.702  
14,41.164,rs1325533,-1.814  
14,41.198,rs848124,-1.856  
14,41.274,rs1925685,-1.838  
14,41.275,rs10131807,-1.839  
14,41.307,rs848049,-1.896  
14,41.321,rs7144374,-1.919  
14,41.321,rs848048,-1.920  
14,41.326,rs1325530,-1.917  
14,41.357,rs2022106,-1.903  
14,41.420,rs861928,-1.876  
14,41.427,rs7159241,-1.856  
14,41.465,rs10130699,-1.752  
14,41.480,rs7150942,-1.794  
14,41.491,rs17767350,-1.815  
14,41.504,rs9322971,-1.837  
14,41.735,rs1950372,-1.817  
14,41.887,rs1569899,-1.779  
14,42.144,rs1951646,-1.918  
14,42.198,rs6571820,-1.864  
14,42.228,rs17179497,-1.851  
14,42.243,rs8018889,-1.869  
14,42.286,rs1952790,-1.896  
14,42.327,rs1952786,-1.941  
14,42.388,rs10498333,-1.996  
14,42.391,rs4146557,-1.999  
14,42.416,rs17107486,-2.006  
14,42.419,rs7159917,-2.007  
14,42.428,rs12147019,-1.994  
14,42.429,rs4901596,-1.991

14,42.456,rs2812086,-1.896  
14,42.459,rs2250334,-1.894  
14,42.469,rs11628551,-1.966  
14,42.476,rs1028930,-2.001  
14,42.477,rs1958488,-1.996  
14,42.477,rs2812031,-2.027  
14,42.478,rs951136,-2.087  
14,42.480,rs10145633,-2.013  
14,42.491,rs1556700,-2.001  
14,42.534,rs1168555,-2.046  
14,42.582,rs8003056,-2.011  
14,42.593,rs11847817,-2.001  
14,42.650,rs11622000,-1.987  
14,42.684,rs4432172,-1.903  
14,42.700,rs8182000,-1.864  
14,42.727,rs979002,-1.788  
14,42.797,rs3742354,-1.757  
14,42.867,rs9322996,-1.711  
14,43.021,rs175677,-1.664  
14,43.089,rs9323003,-1.626  
14,43.099,rs1958958,-1.640  
14,43.113,rs17780306,-1.654  
14,43.115,rs1953200,-1.657  
14,43.131,rs4903057,-1.604  
14,43.148,rs1957198,-1.552  
14,43.278,rs7158539,-1.458  
14,43.331,rs10134152,-1.318  
14,43.354,rs4903832,-1.304  
14,43.363,rs9323025,-1.298  
14,43.388,rs8005565,-1.332  
14,43.392,rs17781119,-1.337  
14,43.463,rs8017390,-1.187  
14,43.468,rs17665297,-1.184  
14,43.495,rs12886510,-1.191  
14,43.510,rs17616128,-1.263  
14,43.580,rs11157247,-1.253  
14,43.587,rs10149831,-1.246  
14,43.590,rs17112218,-1.244  
14,43.650,rs912384,-1.179  
14,43.697,rs945316,-1.167  
14,43.765,rs17112672,-1.115  
14,43.804,rs10498365,-1.083  
14,43.811,rs1393835,-1.083  
14,43.847,rs961015,-0.887  
14,43.869,rs2247407,-0.863  
14,43.936,rs4346126,-0.824  
14,43.944,rs7156273,-0.817  
14,43.986,rs10150101,-0.799  
14,43.990,rs1777096,-0.816  
14,44.000,rs1627411,-0.861  
14,44.006,rs6572168,-0.888  
14,44.035,rs6572182,-0.980  
14,44.037,rs2044747,-0.988  
14,44.048,rs7146781,-0.897  
14,44.227,rs12590884,-0.811  
14,44.230,rs8005238,-0.813  
14,44.260,rs12432613,-0.743  
14,44.309,rs2185359,-0.698  
14,44.382,rs11157362,-0.628  
14,44.475,rs17114446,-0.639  
14,44.476,rs7154595,-0.639

14,44.548,rs1951560,-0.649  
14,44.565,rs10141817,-0.656  
14,44.600,rs1955969,-0.639  
14,44.618,rs17114690,-0.651  
14,44.636,rs8013483,-0.655  
14,44.661,rs11848593,-0.613  
14,44.665,rs7157808,-0.562  
14,44.720,rs8004854,-0.472  
14,44.805,rs12433092,-0.460  
14,44.812,rs17627259,-0.459  
14,44.909,rs10152023,-0.485  
14,44.947,rs4399472,-0.493  
14,45.021,rs11157457,-0.613  
14,45.120,rs1958149,-0.656  
14,45.212,rs10140681,-0.669  
14,45.420,rs858893,-0.626  
14,45.458,rs8006944,-0.613  
14,45.575,rs12893532,-0.621  
14,45.589,rs1954233,-0.637  
14,45.594,rs17117834,-0.661  
14,45.598,rs2066309,-0.680  
14,45.601,rs10134041,-0.698  
14,45.616,rs8016110,-0.709  
14,45.627,rs12050092,-0.659  
14,45.787,rs1952212,-0.629  
14,45.882,rs8009848,-0.658  
14,46.026,rs1958628,-0.669  
14,46.060,rs8003717,-0.580  
14,46.064,rs1959775,-0.607  
14,46.084,rs10149330,-0.593  
14,46.130,rs7147386,-0.592  
14,46.151,rs12896750,-0.583  
14,46.162,rs1371793,-0.583  
14,46.193,rs10140519,-0.581  
14,46.249,rs10135893,-0.606  
14,46.286,rs4243557,-0.623  
14,46.303,rs10498406,-0.584  
14,46.374,rs1959573,-0.566  
14,46.380,rs946626,-0.563  
14,46.412,rs8017802,-0.557  
14,46.497,rs2585390,-0.572  
14,46.562,rs4526940,-0.575  
14,46.679,rs2352907,-0.580  
14,46.760,rs1956101,-0.583  
14,46.891,rs971676,-0.571  
14,47.175,rs6572562,-0.513  
14,47.395,rs4900914,-0.486  
14,47.441,rs1530947,-0.471  
14,47.526,rs11622841,-0.440  
14,47.571,rs4898626,-0.393  
14,48.063,rs3126184,-0.388  
14,48.113,rs7159113,-0.378  
14,48.166,rs8003924,-0.338  
14,48.210,rs6572635,-0.309  
14,48.243,rs12437060,-0.271  
14,48.258,rs2281530,-0.254  
14,48.336,rs7155622,-0.236  
14,48.786,rs4901030,-0.216  
14,49.092,rs3015452,-0.204  
14,49.249,rs6572692,-0.200  
14,49.351,rs7143959,-0.266

14,49.380,rs12893300,-0.241  
14,49.392,rs6650505,-0.232  
14,49.468,rs2027343,-0.191  
14,49.472,rs7143869,-0.195  
14,49.487,rs1953879,-0.192  
14,49.493,rs1547763,-0.222  
14,49.495,rs17793937,-0.229  
14,49.543,rs8004788,-0.183  
14,49.598,rs1538615,-0.131  
14,49.617,rs949633,-0.143  
14,49.648,rs4901069,-0.155  
14,49.681,rs11847331,-0.149  
14,49.689,rs1953888,-0.148  
14,49.715,rs7147946,-0.144  
14,49.779,rs4243569,-0.136  
14,49.834,rs7148539,-0.098  
14,49.848,rs7149337,-0.105  
14,49.858,rs4526942,-0.117  
14,49.867,rs7142110,-0.125  
14,49.869,rs8013182,-0.138  
14,49.872,rs11629344,-0.156  
14,49.877,rs1987118,-0.164  
14,49.877,rs4901119,-0.165  
14,49.880,rs17831163,-0.165  
14,49.888,rs7158425,-0.176  
14,49.902,rs8022389,-0.216  
14,49.905,rs11844403,-0.226  
14,49.909,rs2064923,-0.243  
14,49.911,rs1950935,-0.239  
14,49.911,rs4898698,-0.236  
14,49.913,rs1956588,-0.242  
14,49.913,rs11627579,-0.218  
14,49.918,rs11626565,-0.203  
14,49.919,rs2357112,-0.173  
14,49.919,rs17588609,-0.176  
14,49.919,rs10484085,-0.198  
14,49.929,rs6572783,-0.205  
14,49.943,rs7153066,-0.222  
14,49.950,rs11157849,-0.250  
14,49.957,rs1014158,-0.301  
14,49.965,rs2993998,-0.301  
14,49.975,rs11157866,-0.312  
14,49.976,rs4898725,-0.312  
14,49.977,rs1693198,-0.312  
14,49.980,rs1253698,-0.314  
14,49.986,rs1253660,-0.316  
14,50.059,rs1151579,-0.338  
14,50.146,rs2645737,-0.317  
14,50.255,rs941630,-0.304  
14,50.351,rs4901201,-0.301  
14,50.472,rs8019150,-0.272  
14,50.481,rs11851721,-0.270  
14,50.567,rs802994,-0.284  
14,50.606,rs803002,-0.291  
14,50.742,rs7161576,-0.281  
14,50.790,rs1254600,-0.269  
14,50.906,rs2145957,-0.251  
14,50.962,rs10144981,-0.248  
14,51.018,rs10483614,-0.248  
14,51.098,rs8004624,-0.233  
14,51.434,rs1570878,-0.287

14,51.572,rs7153163,-0.307  
14,51.577,rs12589633,-0.304  
14,51.627,rs12897244,-0.270  
14,51.632,rs2150541,-0.267  
14,52.175,rs2161944,-0.309  
14,52.282,rs17126349,-0.314  
14,52.376,rs17126432,-0.318  
14,52.404,rs1959839,-0.322  
14,52.476,rs11622595,-0.329  
14,52.737,rs4901431,-0.344  
14,52.739,rs17093060,-0.343  
14,52.806,rs2245007,-0.327  
14,52.975,rs1380131,-0.351  
14,53.049,rs8020341,-0.369  
14,53.092,rs210321,-0.383  
14,53.251,rs210343,-0.337  
14,53.453,rs8017615,-0.323  
14,53.489,rs2150279,-0.302  
14,53.500,rs17126953,-0.291  
14,53.534,rs4898812,-0.263  
14,53.673,rs4901458,-0.283  
14,53.819,rs8018146,-0.308  
14,53.837,rs11625439,-0.315  
14,54.032,rs1957860,-0.378  
14,54.097,rs4901474,-0.425  
14,54.277,rs932683,-0.421  
14,54.337,rs10134051,-0.419  
14,54.468,rs10483636,-0.406  
14,54.472,rs10150369,-0.406  
14,54.512,rs1950202,-0.393  
14,54.641,rs8015391,-0.344  
14,54.745,rs1187586,-0.294  
14,54.750,rs1211769,-0.294  
14,54.811,rs10140484,-0.300  
14,54.811,rs3742560,-0.301  
14,54.812,rs3742562,-0.294  
14,54.839,rs4898845,-0.246  
14,54.845,rs2181050,-0.283  
14,54.871,rs7157453,-0.280  
14,54.879,rs2273742,-0.308  
14,54.883,rs4898847,-0.300  
14,54.895,rs11628843,-0.320  
14,54.913,rs4901533,-0.268  
14,54.919,rs7156891,-0.263  
14,54.930,rs7143004,-0.210  
14,54.957,rs7143189,-0.229  
14,55.255,rs11849961,-0.237  
14,55.883,rs10220441,-0.204  
14,56.161,rs998871,-0.183  
14,56.709,rs1953352,-0.129  
14,56.778,rs8014482,-0.113  
14,56.903,rs4901602,-0.116  
14,57.091,rs11628156,-0.104  
14,57.174,rs8018542,-0.074  
14,57.229,rs2183628,-0.078  
14,57.260,rs8020688,-0.079  
14,57.376,rs1188183,-0.052  
14,57.550,rs241541,-0.035  
14,57.586,rs1152455,-0.035  
14,57.596,rs398652,-0.034  
14,57.640,rs395643,-0.033

14,57.683,rs7160120,-0.034  
14,57.846,rs11158077,-0.043  
14,58.156,rs242584,-0.065  
14,58.209,rs1188692,-0.052  
14,58.242,rs1152505,-0.048  
14,58.283,rs1834805,-0.058  
14,58.301,rs1189136,-0.061  
14,58.337,rs1300662,-0.047  
14,58.363,rs1189281,-0.017  
14,58.367,rs17772793,-0.024  
14,58.369,rs1890905,-0.028  
14,58.373,rs12893562,-0.031  
14,58.382,rs4901693,-0.018  
14,58.390,rs1959056,-0.014  
14,58.398,rs1959055,-0.008  
14,58.450,rs11628364,-0.001  
14,58.453,rs11158120,-0.001  
14,58.511,rs1041316,-0.000  
14,58.542,rs2094694,-0.000  
14,58.583,rs6573103,-0.001  
14,58.584,rs198256,-0.001  
14,58.589,rs1483109,-0.000  
14,58.590,rs1483111,-0.000  
14,58.597,rs198247,-0.000  
14,58.604,rs6573104,0.000  
14,58.622,rs1754751,0.000  
14,58.643,rs198223,0.000  
14,58.685,rs928110,0.000  
14,58.689,rs198262,0.000  
14,58.727,rs10483677,-0.000  
14,58.784,rs850274,-0.001  
14,58.855,rs17719756,-0.003  
14,58.858,rs4901746,-0.002  
14,58.863,rs1027728,-0.001  
14,58.920,rs1189821,-0.001  
14,58.999,rs4901766,-0.003  
14,59.126,rs6573142,-0.004  
14,59.309,rs1495471,-0.005  
14,59.414,rs7156976,-0.007  
14,59.431,rs17723597,-0.012  
14,59.440,rs12896156,-0.016  
14,59.480,rs12898168,-0.022  
14,59.524,rs10431700,-0.027  
14,59.555,rs11158170,-0.024  
14,59.601,rs8014539,-0.031  
14,59.641,rs1951004,-0.039  
14,59.781,rs878085,-0.057  
14,59.820,rs1028458,-0.053  
14,59.827,rs808208,-0.053  
14,59.866,rs2223934,-0.073  
14,59.898,rs178488,-0.078  
14,59.975,rs3829765,-0.092  
14,59.976,rs12100853,-0.092  
14,59.993,rs17094383,-0.091  
14,60.106,rs3783694,-0.112  
14,60.146,rs160459,-0.098  
14,60.148,rs11850518,-0.099  
14,60.160,rs160475,-0.122  
14,60.160,rs311840,-0.103  
14,60.166,rs311824,-0.098  
14,60.173,rs2651256,-0.095

14,60.177,rs311871,-0.097  
14,60.186,rs856221,-0.087  
14,60.208,rs2114618,-0.080  
14,60.210,rs380978,-0.078  
14,60.217,rs85425,-0.079  
14,60.227,rs17095466,-0.082  
14,60.229,rs2180426,-0.082  
14,60.230,rs1950666,-0.081  
14,60.232,rs8007404,-0.081  
14,60.256,rs3759704,-0.075  
14,60.280,rs1252992,-0.084  
14,60.280,rs8016570,-0.085  
14,60.296,rs17093314,-0.089  
14,60.301,rs17255814,-0.090  
14,60.303,rs12433783,-0.090  
14,60.348,rs7154819,-0.115  
14,60.351,rs11848964,-0.116  
14,60.406,rs10138713,-0.118  
14,60.417,rs1957982,-0.119  
14,60.701,rs216504,-0.136  
14,60.702,rs8015798,-0.136  
14,60.809,rs2350890,-0.156  
14,61.493,rs7152640,-0.199  
14,61.607,rs11623261,-0.195  
14,61.638,rs4902033,-0.221  
14,61.647,rs12147034,-0.202  
14,61.651,rs12436103,-0.202  
14,61.683,rs17098135,-0.215  
14,61.717,rs11158335,-0.228  
14,61.809,rs7151034,-0.203  
14,61.845,rs3742633,-0.206  
14,61.861,rs767757,-0.205  
14,61.968,rs2252267,-0.165  
14,61.987,rs1088672,-0.129  
14,62.046,rs2249106,-0.100  
14,62.084,rs710063,-0.083  
14,62.097,rs11844065,-0.078  
14,62.214,rs6573400,-0.041  
14,62.363,rs170098,-0.037  
14,62.373,rs11625130,-0.037  
14,62.422,rs11629169,-0.038  
14,62.529,rs17735026,-0.049  
14,62.536,rs2226206,-0.050  
14,62.549,rs10150174,-0.051  
14,62.554,rs1954491,-0.051  
14,62.634,rs8006839,-0.052  
14,62.726,rs4902119,-0.050  
14,62.748,rs12588013,-0.063  
14,63.011,rs1954568,-0.047  
14,63.047,rs7150844,-0.048  
14,63.065,rs2000250,-0.056  
14,63.128,rs9788478,-0.068  
14,63.142,rs4902165,-0.085  
14,63.145,rs10483749,-0.084  
14,63.162,rs1602208,-0.080  
14,63.201,rs8020132,-0.098  
14,63.213,rs12436815,-0.108  
14,63.227,rs17100383,-0.108  
14,63.324,rs1255504,-0.107  
14,63.359,rs17100629,-0.106  
14,63.471,rs4902214,-0.098

14,63.498,rs2144112,-0.099  
14,63.694,rs2012961,-0.105  
14,63.738,rs10483770,-0.111  
14,63.803,rs728525,-0.116  
14,63.850,rs12432261,-0.124  
14,64.222,rs945029,-0.201  
14,64.225,rs12884607,-0.201  
14,64.487,rs9323444,-0.162  
14,64.557,rs1029145,-0.166  
14,64.583,rs7144688,-0.166  
14,65.013,rs2987969,-0.151  
14,65.053,rs10498514,-0.148  
14,65.613,rs4902307,-0.090  
14,65.773,rs2295522,-0.070  
14,65.824,rs1695777,-0.063  
14,65.861,rs229591,-0.062  
14,65.912,rs17826201,-0.062  
14,65.935,rs229617,-0.062  
14,66.283,rs2296322,-0.062  
14,66.288,rs2296316,-0.061  
14,66.300,rs11622328,-0.059  
14,66.301,rs737523,-0.059  
14,66.365,rs8007846,-0.027  
14,66.366,rs3924222,-0.027  
14,66.368,rs7494064,-0.027  
14,66.369,rs7493793,-0.026  
14,66.370,rs4131564,-0.026  
14,66.375,rs2022841,-0.029  
14,66.379,rs1954610,-0.020  
14,66.385,rs1147450,-0.018  
14,66.391,rs1273868,-0.015  
14,66.475,rs7156426,-0.028  
14,66.491,rs1077989,-0.025  
14,66.539,rs17249216,-0.015  
14,66.641,rs1465118,-0.004  
14,66.666,rs11158685,-0.004  
14,66.683,rs17249299,-0.004  
14,66.726,rs8007199,-0.001  
14,66.852,rs742869,-0.000  
14,67.170,rs3742883,-0.002  
14,67.212,rs2295109,-0.003  
14,67.272,rs181575,-0.003  
14,67.931,rs4902562,-0.010  
14,67.936,rs1957572,-0.010  
14,68.073,rs8014025,-0.012  
14,68.094,rs729138,-0.013  
14,68.102,rs9323508,-0.013  
14,68.117,rs1570107,-0.010  
14,68.180,rs174213,-0.023  
14,68.198,rs412638,-0.035  
14,68.209,rs17106449,-0.040  
14,68.210,rs181455,-0.040  
14,68.240,rs3742888,-0.035  
14,68.255,rs723113,-0.033  
14,68.270,rs10136833,-0.032  
14,68.292,rs2268974,-0.034  
14,68.298,rs2268968,-0.034  
14,68.315,rs1007407,-0.028  
14,68.338,rs12147311,-0.030  
14,68.674,rs4902710,-0.016  
14,68.713,rs1147474,-0.017



14,68.722,rs2274442,-0.017  
14,68.752,rs11622064,-0.017  
14,68.834,rs12884741,-0.018  
14,68.925,rs1466255,-0.020  
14,69.217,rs8015709,-0.049  
14,69.270,rs7153985,-0.048  
14,69.280,rs17107425,-0.032  
14,69.299,rs1276120,-0.032  
14,69.335,rs10142893,-0.029  
14,69.361,rs61305,-0.031  
14,69.425,rs12435978,-0.031  
14,69.437,rs150951,-0.031  
14,69.448,rs2169074,-0.028  
14,69.540,rs8014714,-0.019  
14,69.551,rs4899333,-0.019  
14,69.591,rs8020127,-0.028  
14,69.734,rs3759774,-0.032  
14,70.023,rs10147181,-0.007  
14,70.039,rs1205236,-0.007  
14,70.049,rs8688,-0.004  
14,70.128,rs11622989,-0.002  
14,70.217,rs12884068,-0.004  
14,70.256,rs12589331,-0.002  
14,70.259,rs2526889,-0.002  
14,70.469,rs11622673,-0.000  
14,70.506,rs221917,-0.001  
14,70.514,rs221905,-0.001  
14,70.613,rs12896453,0.000  
14,70.625,rs1000449,0.000  
14,70.655,rs11623996,0.000  
14,70.746,rs41227,0.001  
14,71.433,rs1204982,0.003  
14,71.762,rs2533059,0.000  
14,71.867,rs1205060,0.000  
14,71.871,rs36424,0.000  
14,71.912,rs1205044,0.001  
14,71.972,rs36341,0.001  
14,72.004,rs2238273,0.001  
14,72.004,rs764624,0.001  
14,72.020,rs8021249,0.001  
14,72.021,rs8022882,0.001  
14,72.033,rs36740,0.002  
14,72.053,rs12883161,0.007  
14,72.087,rs149689,0.004  
14,72.101,rs17179877,0.004  
14,72.108,rs193548,0.004  
14,72.110,rs185010,0.004  
14,72.117,rs17109092,0.003  
14,72.148,rs847342,0.000  
14,72.187,rs2681728,-0.000  
14,72.234,rs2238190,-0.002  
14,72.265,rs4903027,-0.003  
14,72.292,rs2239222,-0.001  
14,72.302,rs3742843,-0.001  
14,72.305,rs10146857,-0.001  
14,72.308,rs7150135,-0.001  
14,72.318,rs7492545,-0.000  
14,72.346,rs917069,-0.000  
14,72.366,rs2526910,-0.000  
14,72.370,rs7159986,-0.000  
14,72.382,rs11158973,0.000

14,72.402,rs17120302,-0.001  
14,72.412,rs11622224,-0.003  
14,72.413,rs3814864,-0.003  
14,72.415,rs12931,-0.003  
14,72.418,rs1990059,-0.003  
14,72.529,rs17182237,-0.006  
14,72.544,rs11845125,-0.006  
14,72.583,rs177378,-0.006  
14,72.650,rs17126867,-0.009  
14,72.935,rs1014087,-0.004  
14,72.992,rs6574129,-0.003  
14,73.001,rs12891009,-0.003  
14,73.003,rs17128968,-0.003  
14,73.011,rs42923,-0.003  
14,73.276,rs7158118,-0.002  
14,73.436,rs2286425,-0.002  
14,73.773,rs1003907,0.002  
14,73.809,rs8009761,0.000  
14,73.959,rs3815329,0.005  
14,74.034,rs2196861,0.003  
14,74.080,rs10146172,0.000  
14,74.093,rs8014087,0.000  
14,74.726,rs2268613,0.001  
14,74.806,rs8014403,0.002  
14,75.005,rs10146482,0.003  
14,75.189,rs8004504,0.004  
14,75.192,rs17103080,0.004  
14,75.213,rs6574213,0.003  
14,75.234,rs8013918,0.001  
14,75.276,rs8004059,0.001  
14,75.317,rs3742768,0.002  
14,75.332,rs8021524,0.002  
14,75.356,rs11159135,0.001  
14,75.358,rs17103133,0.002  
14,75.360,rs760247,0.003  
14,75.360,rs2005292,0.007  
14,75.364,rs11159136,0.007  
14,75.378,rs10151713,0.006  
14,75.388,rs12879500,0.006  
14,75.439,rs10483865,0.007  
14,75.449,rs6574227,0.007  
14,75.529,rs4899563,0.002  
14,75.560,rs10483867,0.000  
14,75.594,rs7146899,-0.000  
14,75.635,rs6574236,-0.000  
14,75.635,rs6574237,-0.000  
14,75.638,rs7153685,-0.000  
14,75.653,rs12147331,-0.000  
14,75.693,rs175714,0.000  
14,75.793,rs10483869,0.003  
14,75.799,rs7159570,0.003  
14,75.950,rs12432793,0.001  
14,76.529,rs175896,0.008  
14,76.995,rs2205181,0.013  
14,77.364,rs11159173,0.021  
14,77.431,rs2543361,0.019  
14,77.475,rs17104278,0.019  
14,77.478,rs951304,0.019  
14,77.483,rs4899587,0.020  
14,77.495,rs4522353,0.020  
14,77.507,rs4903399,0.031

14,77.511,rs11622068,0.022  
14,77.539,rs4344663,0.039  
14,77.539,rs17104397,0.030  
14,77.560,rs2361287,0.053  
14,77.564,rs12435564,0.070  
14,77.575,rs1867655,0.082  
14,77.576,rs2921451,0.083  
14,77.580,rs10147732,0.081  
14,77.587,rs3813545,0.090  
14,77.593,rs17583842,0.099  
14,77.597,rs1676303,0.102  
14,77.603,rs2860216,0.099  
14,77.604,rs2927288,0.102  
14,77.625,rs1642818,0.099  
14,77.627,rs1642820,0.099  
14,77.636,rs4142175,0.104  
14,77.659,rs10483875,0.117  
14,77.715,rs11626491,0.155  
14,77.719,rs17735651,0.158  
14,77.720,rs12589778,0.159  
14,77.784,rs8003586,0.202  
14,77.786,rs11629409,0.229  
14,77.787,rs17104945,0.224  
14,77.796,rs7160583,0.225  
14,77.842,rs2363506,0.146  
14,77.846,rs4899628,0.144  
14,77.878,rs7151589,0.128  
14,77.896,rs10431632,0.131  
14,77.987,rs3813543,0.148  
14,78.014,rs1396239,0.141  
14,78.038,rs8016340,0.125  
14,78.083,rs8018063,0.091  
14,78.095,rs1911728,0.084  
14,78.146,rs391966,0.065  
14,78.209,rs6574363,0.100  
14,78.215,rs11624564,0.104  
14,78.249,rs3783986,0.101  
14,78.318,rs3759732,0.096  
14,78.535,rs7142380,0.098  
14,78.668,rs11159273,0.092  
14,78.700,rs2364602,0.091  
14,78.855,rs2886123,0.082  
14,79.293,rs2364748,0.107  
14,79.300,rs8006523,0.108  
14,79.367,rs4903675,0.114  
14,79.377,rs12434238,0.134  
14,79.554,rs2365350,0.141  
14,79.598,rs8020238,0.139  
14,79.624,rs177171,0.113  
14,79.691,rs1541616,0.084  
14,79.709,rs10483892,0.078  
14,79.749,rs213569,0.061  
14,79.805,rs2178863,0.049  
14,79.816,rs10141201,0.049  
14,79.978,rs17107326,0.050  
14,80.009,rs214000,0.052  
14,80.141,rs8008554,0.078  
14,80.150,rs1124299,0.078  
14,80.322,rs741523,0.104  
14,80.331,rs2370825,0.103  
14,80.371,rs6574460,0.097

14,80.421,rs4903794,0.077  
14,80.427,rs10142370,0.093  
14,80.429,rs17108195,0.084  
14,80.431,rs929920,0.077  
14,80.504,rs150786,0.072  
14,80.534,rs31434,0.066  
14,80.539,rs17835920,0.066  
14,80.544,rs2270964,0.066  
14,80.604,rs7143117,0.066  
14,80.630,rs6574495,0.066  
14,80.666,rs7141906,0.068  
14,80.673,rs10133101,0.068  
14,80.689,rs2887896,0.072  
14,80.755,rs12895906,0.091  
14,80.788,rs7141420,0.127  
14,80.877,rs221430,0.090  
14,80.928,rs11159412,0.085  
14,80.933,rs1861957,0.083  
14,80.940,rs2215839,0.080  
14,80.959,rs8016688,0.076  
14,80.974,rs10134488,0.073  
14,80.993,rs2242645,0.076  
14,80.997,rs2293823,0.076  
14,81.008,rs17109935,0.088  
14,81.013,rs2293847,0.094  
14,81.023,rs2064005,0.094  
14,81.042,rs7154805,0.098  
14,81.060,rs10483939,0.070  
14,81.172,rs224980,0.063  
14,81.247,rs2273173,0.041  
14,81.288,rs12882445,0.028  
14,81.291,rs9323685,0.027  
14,81.301,rs11159460,0.025  
14,81.314,rs7144237,0.023  
14,81.323,rs10129556,0.025  
14,81.331,rs17600960,0.026  
14,81.377,rs10140829,0.030  
14,81.808,rs3783949,0.021  
14,81.823,rs917986,0.021  
14,81.831,rs12883673,0.021  
14,81.842,rs2300525,0.022  
14,81.899,rs917984,0.026  
14,81.916,rs1957547,0.043  
14,81.939,rs1864167,0.055  
14,82.038,rs6574644,0.070  
14,82.044,rs3109610,0.071  
14,82.110,rs12888000,0.111  
14,82.145,rs7148568,0.156  
14,82.159,rs2236179,0.171  
14,82.222,rs17115605,0.276  
14,82.233,rs2208780,0.287  
14,82.252,rs9323707,0.301  
14,82.365,rs1571378,0.366  
14,82.393,rs10141409,0.378  
14,82.406,rs17116019,0.369  
14,82.435,rs4904036,0.349  
14,82.456,rs2371982,0.354  
14,82.502,rs12588669,0.334  
14,82.510,rs11624992,0.330  
14,82.515,rs8006798,0.329  
14,82.532,rs10149996,0.352

14,82.547,rs11626456,0.372  
14,82.569,rs1430477,0.412  
14,82.586,rs1652593,0.375  
14,82.613,rs12883722,0.383  
14,82.633,rs765614,0.393  
14,82.639,rs17116436,0.398  
14,82.641,rs1958664,0.398  
14,82.657,rs799121,0.409  
14,82.719,rs10483957,0.386  
14,82.754,rs1211307,0.356  
14,82.838,rs2689117,0.355  
14,82.851,rs17678072,0.329  
14,82.884,rs1152349,0.328  
14,82.887,rs1370762,0.328  
14,82.888,rs2039478,0.328  
14,82.916,rs7153719,0.335  
14,82.921,rs7145839,0.406  
14,82.938,rs1959010,0.395  
14,82.942,rs17117498,0.352  
14,82.945,rs17676330,0.383  
14,82.946,rs17117532,0.381  
14,82.958,rs10137321,0.369  
14,82.969,rs7157907,0.374  
14,82.975,rs17117690,0.377  
14,82.978,rs12889310,0.383  
14,82.999,rs1954074,0.399  
14,83.017,rs1263476,0.405  
14,83.024,rs12437252,0.396  
14,83.028,rs17678601,0.391  
14,83.044,rs11159569,0.371  
14,83.049,rs9323731,0.407  
14,83.156,rs162654,0.399  
14,83.188,rs229788,0.378  
14,83.188,rs10484160,0.378  
14,83.207,rs17118600,0.394  
14,83.227,rs17118701,0.412  
14,83.241,rs10498564,0.416  
14,83.258,rs1269347,0.428  
14,83.259,rs1241928,0.425  
14,83.299,rs6574751,0.342  
14,83.306,rs12887744,0.329  
14,83.324,rs1241906,0.318  
14,83.362,rs1958453,0.303  
14,83.375,rs12589712,0.307  
14,83.380,rs1958442,0.313  
14,83.410,rs7145396,0.356  
14,83.424,rs1705650,0.377  
14,83.456,rs2137000,0.407  
14,83.463,rs7153883,0.413  
14,83.504,rs8005616,0.408  
14,83.552,rs4904160,0.404  
14,83.562,rs17119756,0.404  
14,83.563,rs7147015,0.404  
14,83.594,rs8003613,0.479  
14,83.598,rs1381610,0.484  
14,83.609,rs11159642,0.470  
14,83.640,rs4350505,0.479  
14,83.728,rs12894449,0.519  
14,83.765,rs1813404,0.541  
14,83.803,rs726957,0.563  
14,83.831,rs2623125,0.611

14,83.838,rs1481417,0.623  
14,83.841,rs1110774,0.623  
14,83.914,rs12881403,0.612  
14,83.922,rs856691,0.613  
14,83.927,rs856684,0.613  
14,84.175,rs1756575,0.646  
14,84.233,rs17120628,0.655  
14,84.310,rs2210303,0.718  
14,84.374,rs8022603,0.629  
14,84.393,rs17120944,0.632  
14,84.508,rs4899866,0.658  
14,84.825,rs1289414,0.628  
14,84.865,rs1289429,0.623  
14,84.971,rs17121169,0.580  
14,85.010,rs1884008,0.585  
14,85.076,rs12882910,0.571  
14,85.079,rs10137902,0.572  
14,85.089,rs1950177,0.574  
14,85.215,rs1956633,0.578  
14,85.233,rs2747005,0.574  
14,85.555,rs4595727,0.699  
14,85.717,rs4470088,0.737  
14,85.772,rs9972219,0.716  
14,85.974,rs1952582,0.622  
14,86.303,rs2153532,0.575  
14,86.407,rs2096073,0.570  
14,86.454,rs1289248,0.568  
14,86.458,rs11628919,0.567  
14,86.531,rs8007741,0.531  
14,86.532,rs7151572,0.527  
14,86.542,rs1638720,0.594  
14,86.577,rs12586410,0.473  
14,86.684,rs1615552,0.527  
14,86.796,rs7151042,0.510  
14,86.846,rs10139298,0.505  
14,86.916,rs17123675,0.506  
14,86.960,rs8010274,0.529  
14,86.965,rs1959720,0.532  
14,86.969,rs17259779,0.533  
14,86.997,rs1152368,0.542  
14,87.199,rs378816,0.509  
14,87.867,rs3850384,0.511  
14,88.128,rs8021613,0.511  
14,88.133,rs8007372,0.512  
14,88.219,rs1631092,0.557  
14,88.292,rs8009725,0.609  
14,88.519,rs11849247,0.568  
14,88.595,rs10148709,0.553  
14,88.633,rs422107,0.535  
14,88.735,rs10143067,0.484  
14,88.763,rs2025078,0.471  
14,88.805,rs2000611,0.458  
14,88.842,rs4904445,0.449  
14,88.894,rs12147268,0.458  
14,88.963,rs10141646,0.483  
14,89.620,rs366476,0.527  
14,89.620,rs2295136,0.500  
14,91.094,rs10134036,0.458  
14,91.162,rs17124948,0.468  
14,91.195,rs719572,0.473  
14,91.333,rs4904488,0.558

14,91.369,rs7146193,0.572  
14,91.438,rs8017825,0.594  
14,91.461,rs10147907,0.613  
14,91.489,rs1287603,0.641  
14,91.575,rs1033875,0.787  
14,91.622,rs17714667,0.857  
14,91.689,rs4904507,0.957  
14,91.700,rs8021839,1.066  
14,91.743,rs927617,1.040  
14,91.793,rs932731,1.041  
14,91.889,rs17125478,1.065  
14,91.892,rs8009301,1.008  
14,91.973,rs11624027,1.021  
14,92.045,rs4904523,1.009  
14,92.073,rs8007023,0.998  
14,92.099,rs10498620,1.001  
14,92.103,rs11845021,1.004  
14,92.192,rs3825671,0.974  
14,92.260,rs11846050,0.952  
14,92.416,rs4904569,0.957  
14,92.420,rs10151458,0.958  
14,92.473,rs4904574,0.920  
14,92.503,rs8006343,0.872  
14,92.536,rs7152796,0.886  
14,92.608,rs243224,0.914  
14,92.627,rs243229,0.930  
14,92.640,rs8018053,0.894  
14,92.683,rs10131830,0.878  
14,92.706,rs11845079,0.875  
14,92.744,rs1967854,0.814  
14,92.749,rs11622222,0.758  
14,92.827,rs243196,0.814  
14,92.857,rs12101236,0.843  
14,92.921,rs242776,0.904  
14,92.946,rs8011669,0.855  
14,92.963,rs11849798,0.909  
14,93.061,rs998564,0.899  
14,93.130,rs7143726,0.882  
14,93.194,rs7155435,0.879  
14,93.290,rs7160734,0.925  
14,93.349,rs11624003,0.891  
14,93.453,rs11626231,0.819  
14,93.613,rs7154092,0.693  
14,93.712,rs9488,0.668  
14,93.745,rs1286910,0.639  
14,93.783,rs8008501,0.642  
14,93.819,rs11623922,0.624  
14,93.826,rs4900026,0.620  
14,93.856,rs7155680,0.613  
14,94.009,rs12587362,0.648  
14,94.077,rs1294506,0.676  
14,94.115,rs17719594,0.726  
14,94.147,rs1640246,0.752  
14,94.153,rs17126831,0.761  
14,94.167,rs1294544,0.802  
14,94.188,rs1294573,0.891  
14,94.224,rs1286484,0.987  
14,94.251,rs1286459,0.999  
14,94.274,rs1286439,1.077  
14,94.289,rs1286421,1.116  
14,94.302,rs10130644,1.151

14,94.340,rs1742098,1.282  
14,94.357,rs1742083,1.259  
14,94.442,rs17795074,1.406  
14,94.512,rs1286291,1.441  
14,94.574,rs1152431,1.471  
14,94.695,rs7157525,1.417  
14,94.851,rs2295528,1.347  
14,94.873,rs2295525,1.367  
14,94.880,rs11622455,1.374  
14,94.906,rs8017969,1.394  
14,94.913,rs11626203,1.305  
14,94.941,rs7159692,1.425  
14,94.962,rs2277509,1.470  
14,94.982,rs753075,1.553  
14,95.001,rs11629007,1.574  
14,95.011,rs1285767,1.585  
14,95.115,rs1951251,1.591  
14,95.154,rs1285841,1.587  
14,95.353,rs11160011,1.632  
14,95.503,rs1949074,1.669  
14,95.538,rs17799749,1.703  
14,95.573,rs2202955,1.776  
14,95.621,rs7161259,1.885  
14,95.626,rs12889912,1.882  
14,95.640,rs17127496,1.876  
14,95.642,rs11160024,1.875  
14,95.922,rs2402075,1.756  
14,95.936,rs2402076,1.750  
14,95.961,rs929608,1.829  
14,95.974,rs2430342,1.755  
14,96.319,rs7144492,1.910  
14,96.392,rs2402111,1.936  
14,96.398,rs3814833,1.938  
14,96.565,rs8005444,1.790  
14,96.608,rs1742707,1.785  
14,96.646,rs2002627,1.960  
14,96.690,rs12883551,1.952  
14,96.749,rs4904868,2.012  
14,96.826,rs12887171,2.003  
14,96.844,rs8003333,1.990  
14,96.869,rs10143486,1.968  
14,96.948,rs12588868,1.942  
14,96.962,rs7144273,1.941  
14,97.000,rs4904939,1.935  
14,97.008,rs17783630,1.934  
14,97.051,rs7141239,1.665  
14,97.073,rs10498634,1.624  
14,97.089,rs7141006,1.530  
14,97.100,rs7156525,1.527  
14,97.115,rs2104239,1.524  
14,97.131,rs2402172,1.492  
14,97.149,rs8013925,1.456  
14,97.150,rs12433867,1.454  
14,97.172,rs1998434,1.430  
14,97.218,rs7153192,1.377  
14,97.231,rs12896830,1.365  
14,97.245,rs7150931,1.390  
14,97.288,rs2250672,1.253  
14,97.308,rs12586718,1.189  
14,97.315,rs1010651,1.172  
14,97.320,rs17736427,1.173



14,97.422,rs10147689,1.180  
14,97.514,rs3945958,1.199  
14,97.527,rs6650495,1.193  
14,97.595,rs11446,1.081  
14,97.611,rs2402226,1.198  
14,97.677,rs12435423,1.122  
14,97.745,rs11628021,1.133  
14,97.846,rs941542,1.166  
14,97.847,rs749619,1.166  
14,97.858,rs2749509,1.171  
14,98.126,rs7157141,1.267  
14,98.278,rs17128943,1.289  
14,98.295,rs10144530,1.291  
14,98.306,rs2077557,1.421  
14,99.140,rs11847714,1.436  
14,99.209,rs2181386,1.441  
14,99.587,rs4900191,1.443  
14,99.595,rs8008104,1.435  
14,99.634,rs12432245,1.348  
14,99.719,rs7141441,1.287  
14,99.729,rs1950969,1.290  
14,99.737,rs8013763,1.293  
14,99.772,rs8018864,1.266  
14,99.805,rs2896244,1.252  
14,99.807,rs17129181,1.248  
14,99.816,rs722462,1.301  
14,99.870,rs4905091,1.118  
14,99.896,rs4905092,1.091  
14,99.939,rs10142808,1.217  
14,99.982,rs8017732,1.343  
14,100.053,rs17129300,1.405  
14,100.060,rs4905110,1.408  
14,100.070,rs3748333,1.430  
14,100.112,rs2402374,1.447  
14,100.235,rs730959,1.376  
14,100.241,rs12436854,1.380  
14,100.274,rs7155044,1.389  
14,100.349,rs4905129,1.385  
14,100.537,rs4905143,1.370  
14,100.728,rs17190904,1.366  
14,100.800,rs12886562,1.366  
14,100.853,rs4905164,1.372  
14,101.397,rs11626051,1.353  
14,101.544,rs10498639,1.269  
14,101.735,rs2749527,1.272  
14,101.802,rs1243166,1.293  
14,101.886,rs1956707,1.315  
14,101.940,rs7160890,1.340  
14,101.957,rs17090790,1.344  
14,101.983,rs17825002,1.344  
14,101.992,rs7151095,1.344  
14,102.155,rs2295653,1.346  
14,102.206,rs11626091,1.464  
14,102.290,rs4905211,1.499  
14,102.332,rs10145558,1.514  
14,102.393,rs17752932,1.535  
14,102.480,rs10135681,1.557  
14,102.669,rs2069974,1.525  
14,102.712,rs1884082,1.531  
14,102.735,rs17826506,1.585  
14,102.759,rs12885659,1.638

14,102.778,rs17091191,1.669  
14,102.829,rs1955650,1.745  
14,102.837,rs17826697,1.750  
14,102.844,rs10148982,1.755  
14,102.912,rs17826925,1.808  
14,102.945,rs8016615,1.801  
14,103.068,rs12897986,1.880  
14,103.070,rs7145086,1.881  
14,103.107,rs8004620,1.969  
14,103.110,rs1950771,1.829  
14,103.111,rs10136233,1.804  
14,103.140,rs10139313,1.585  
14,103.145,rs4905248,1.500  
14,103.222,rs1243511,1.487  
14,103.244,rs7157079,1.471  
14,103.266,rs12432049,1.382  
14,103.273,rs1984239,1.192  
14,103.274,rs1243549,1.164  
14,103.285,rs12881798,1.159  
14,103.323,rs2983478,1.266  
14,103.332,rs744654,1.272  
14,103.363,rs10129901,1.234  
14,103.370,rs1243582,1.230  
14,103.393,rs8018330,1.194  
14,103.460,rs9323917,1.137  
14,103.465,rs7141416,1.135  
14,103.489,rs7154873,1.033  
14,103.547,rs7146324,0.905  
14,103.551,rs2353567,0.904  
14,103.583,rs11620631,0.845  
14,103.585,rs10136276,0.843  
14,103.605,rs6575497,0.826  
14,103.709,rs1187628,0.841  
14,103.727,rs12882788,0.836  
14,103.811,rs941567,0.809  
14,103.841,rs10149382,0.799  
14,103.908,rs1884535,0.800  
14,103.951,rs7161580,0.804  
14,103.967,rs1124242,0.815  
14,104.016,rs10147069,0.848  
14,104.019,rs941570,0.849  
14,104.056,rs12885098,0.853  
14,104.089,rs11849211,0.842  
14,104.115,rs17784060,0.829  
14,104.180,rs11848707,0.798  
14,104.185,rs8012238,0.805  
14,104.225,rs942326,0.838  
14,104.232,rs11622677,0.843  
14,104.234,rs10782484,0.797  
14,104.282,rs11846336,0.830  
14,104.299,rs4905298,0.817  
14,104.320,rs1747019,0.822  
14,104.344,rs1187751,0.829  
14,104.419,rs4905324,0.914  
14,104.435,rs1535188,0.944  
14,104.445,rs4905326,0.964  
14,104.482,rs17829116,0.972  
14,104.483,rs12588815,0.919  
14,104.530,rs6575515,0.808  
14,104.596,rs10782485,0.774  
14,104.754,rs2208663,0.764

14,104.757,rs2273750,0.765  
14,104.806,rs12878813,0.770  
14,104.973,rs8015016,0.751  
14,104.983,rs7150527,0.750  
14,104.996,rs1743490,0.754  
14,105.007,rs7151040,0.785  
14,105.031,rs1743506,0.852  
14,105.041,rs8011890,0.796  
14,105.054,rs1748952,0.797  
14,105.084,rs1619092,0.842  
14,105.250,rs10146784,0.905  
14,105.334,rs1951980,0.909  
14,105.356,rs1951981,0.916  
14,105.462,rs1001574,0.965  
14,105.616,rs2369319,0.999  
14,105.683,rs12880795,1.095  
14,105.688,rs10498647,1.098  
14,105.818,rs1998245,1.163  
14,105.834,rs1951297,1.170  
14,105.972,rs12432771,1.229  
14,106.116,rs11160307,1.281  
14,106.200,rs12897115,1.485  
14,106.309,rs11160315,1.535  
14,106.401,rs11621015,1.562  
14,106.424,rs872116,1.572  
14,106.441,rs17093887,1.570  
14,106.466,rs4144131,1.472  
14,106.469,rs945032,1.446  
14,106.502,rs945040,1.328  
14,106.503,rs10132462,1.328  
14,106.522,rs4905470,1.315  
14,106.545,rs2069596,1.279  
14,106.573,rs4905476,1.221  
14,106.580,rs2369522,1.209  
14,106.712,rs2053588,1.284  
14,106.729,rs8022264,1.310  
14,106.737,rs8019939,1.232  
14,106.756,rs4900324,1.195  
14,106.757,rs2275556,1.195  
14,106.811,rs17094086,1.180  
14,106.852,rs17094134,1.167  
14,107.107,rs4905507,1.212  
14,107.119,rs1570558,1.150  
14,107.126,rs2025366,1.086  
14,107.128,rs234601,1.087  
14,107.135,rs234600,1.041  
14,107.149,rs12588027,1.052  
14,107.258,rs2025364,1.131  
14,107.262,rs10143853,1.135  
14,107.298,rs1969795,1.172  
14,107.348,rs4144603,1.285  
14,107.448,rs2145639,1.270  
14,107.530,rs9323955,1.259  
14,107.659,rs4905564,1.250  
14,107.841,rs8022742,1.248  
14,107.938,rs1884062,1.271  
14,108.025,rs1950272,1.360  
14,108.040,rs10484169,1.366  
14,108.073,rs4905580,1.400  
14,108.078,rs1955589,1.391  
14,108.118,rs12586664,1.304

14,108.126,rs7153003,1.284  
14,108.146,rs8006687,1.282  
14,108.159,rs943588,1.285  
14,108.160,rs943587,1.283  
14,108.173,rs8006234,1.253  
14,108.197,rs4900365,1.273  
14,108.298,rs2370267,1.258  
14,108.356,rs1279885,1.241  
14,108.413,rs8008701,1.221  
14,108.556,rs17835902,1.242  
14,108.627,rs234452,1.348  
14,108.635,rs2129026,1.349  
14,108.756,rs2781409,1.384  
14,108.903,rs234220,1.511  
14,109.027,rs234152,1.669  
14,109.040,rs12588238,1.681  
14,109.053,rs17095704,1.688  
14,109.058,rs190182,1.687  
14,109.081,rs234177,1.659  
14,109.226,rs765034,1.499  
14,109.302,rs7160746,1.270  
14,109.358,rs898927,1.151  
14,109.373,rs4905623,1.045  
14,109.438,rs2781400,1.020  
14,109.514,rs2781388,0.971  
14,109.575,rs1548094,0.966  
14,109.668,rs2809137,0.957  
14,109.822,rs2124309,0.947  
14,110.435,rs12436399,0.937  
14,110.481,rs10484134,0.937  
14,110.530,rs698051,0.940  
14,111.035,rs10484125,0.976  
14,111.157,rs7157627,0.984  
14,111.690,rs7152787,0.977  
14,111.940,rs10132254,1.072  
14,112.174,rs8022566,1.088  
14,112.271,rs2400352,1.043  
14,112.438,rs10139212,0.882  
14,112.609,rs995365,0.915  
14,112.790,rs7148473,0.870  
14,112.800,rs17097484,0.867  
14,112.903,rs10141803,0.873  
14,113.042,rs8020624,0.899  
14,113.102,rs7147818,0.910  
14,113.112,rs17528679,0.904  
14,113.171,rs4905752,0.863  
14,113.324,rs7159863,0.854  
14,113.686,rs8019869,0.821  
14,113.960,rs11623043,0.799  
14,114.066,rs11851709,0.872  
14,114.089,rs17098020,0.891  
14,114.107,rs200331,0.904  
14,114.438,rs17098136,0.918  
14,114.446,rs902810,0.921  
14,114.460,rs1257630,0.956  
14,114.482,rs17098186,1.006  
14,114.488,rs2015350,1.013  
14,114.496,rs4905794,1.024  
14,114.573,rs1257676,1.011  
14,114.712,rs807375,0.919  
14,114.735,rs12434512,0.883

14,114.747,rs2988105,0.840  
14,114.767,rs2400528,0.819  
14,114.772,rs868666,0.806  
14,114.794,rs1152774,0.769  
14,114.821,rs710310,0.654  
14,114.825,rs1257428,0.700  
14,114.838,rs3936653,0.716  
14,114.918,rs941519,0.711  
14,114.976,rs2614467,0.655  
14,114.988,rs1704171,0.665  
14,115.005,rs1257324,0.694  
14,115.050,rs1257300,0.738  
14,115.075,rs1257273,0.768  
14,115.251,rs2069492,0.708  
14,115.334,rs941566,0.638  
14,115.380,rs8015948,0.575  
14,115.388,rs8009218,0.567  
14,115.413,rs2400759,0.564  
14,115.424,rs17095114,0.561  
14,115.543,rs3742377,0.552  
14,115.570,rs7157032,0.550  
14,115.612,rs960891,0.552  
14,115.672,rs17099050,0.547  
14,115.697,rs10144013,0.567  
14,115.699,rs7151803,0.570  
14,115.702,rs10141863,0.574  
14,115.735,rs7160423,0.670  
14,115.821,rs3783326,0.655  
14,115.925,rs7157261,0.634  
14,116.333,rs1190967,0.542  
14,116.544,rs1951486,0.504  
14,116.567,rs878078,0.496  
14,116.793,rs756055,0.428  
14,117.061,rs9324018,0.443  
14,117.246,rs12897338,0.430  
14,117.690,rs7142209,0.475  
14,118.033,rs1190917,0.475  
14,118.061,rs1190922,0.473  
14,118.213,rs10146962,0.465  
14,118.274,rs17099637,0.413  
14,118.312,rs1555406,0.398  
14,118.428,rs7146712,0.394  
14,118.454,rs1884537,0.397  
14,118.541,rs12890188,0.373  
14,118.590,rs3087917,0.414  
14,118.656,rs1998053,0.410  
14,118.661,rs4906024,0.413  
14,118.685,rs8008201,0.440  
14,118.696,rs8021312,0.487  
14,118.731,rs11851174,0.537  
14,118.762,rs3809404,0.587  
14,118.778,rs4900479,0.650  
14,118.790,rs2180386,0.654  
14,118.980,rs17172,0.737  
14,119.055,rs8021854,0.702  
14,119.085,rs10132309,0.690  
14,119.115,rs10136671,0.676  
14,119.140,rs7140271,0.671  
14,119.303,rs10141627,0.637  
14,119.322,rs2400968,0.638  
14,119.612,rs4906066,0.520

14,119.618,rs8007317,0.548  
14,119.624,rs4900490,0.575  
14,119.635,rs17099963,0.573  
14,119.688,rs12898111,0.447  
14,119.738,rs4906076,0.496  
14,119.747,rs947193,0.561  
14,119.749,rs915380,0.567  
14,119.809,rs12434963,0.489  
14,119.836,rs10131928,0.465  
14,119.862,rs2400997,0.476  
14,119.919,rs2400998,0.465  
14,119.952,rs4906091,0.456  
14,120.078,rs945020,0.437  
14,120.292,rs2275016,0.357  
14,120.306,rs4900505,0.330  
14,120.313,rs10133989,0.341  
14,120.439,rs7149416,0.371  
14,120.571,rs12880910,0.396  
14,120.609,rs3818079,0.401  
14,120.622,rs7153709,0.402  
14,120.681,rs1190712,0.434  
14,121.021,rs2144064,0.472  
14,121.436,rs7141459,0.454  
14,121.618,rs1678031,0.447  
14,121.707,rs4900525,0.448  
14,121.711,rs3818188,0.448  
14,121.748,rs11621560,0.479  
14,121.913,rs2183637,0.456  
14,122.005,rs8008097,0.441  
14,122.042,rs17791240,0.433  
14,122.317,rs747164,0.306  
14,122.322,rs4906259,0.306  
14,122.352,rs12148050,0.310  
14,122.468,rs4708,0.305  
14,122.555,rs751837,0.325  
14,122.556,rs11627664,0.325  
14,122.608,rs1190223,0.319  
14,122.647,rs11844761,0.314  
14,122.727,rs710100,0.335  
14,122.756,rs8003400,0.336  
14,122.765,rs9672002,0.333  
14,122.835,rs2771369,0.308  
14,122.858,rs1969852,0.281  
14,122.867,rs2403144,0.271  
14,122.874,rs9743995,0.258  
14,122.933,rs1570712,0.202  
14,123.159,rs10129426,0.159  
14,123.481,rs8015761,0.112  
14,123.508,rs11850704,0.110  
14,123.588,rs10142229,0.106  
14,123.608,rs12589669,0.105  
14,123.674,rs941949,0.094  
14,123.726,rs2011069,0.085  
14,123.754,rs8013773,0.077  
14,123.764,rs1890981,0.075  
14,123.783,rs10135847,0.072  
14,123.814,rs4906423,0.070  
14,123.838,rs10143250,0.068  
14,123.872,rs10137053,0.098  
14,123.877,rs4906435,0.106  
14,123.959,rs4243749,0.249

14,123.966,rs12897807,0.261  
14,123.993,rs12434726,0.302  
14,124.095,rs8012258,0.379  
14,124.157,rs3803318,0.338  
14,124.193,rs4983506,0.314  
14,124.216,rs8023004,0.302  
14,124.266,rs11160817,0.328  
14,124.328,rs2498804,0.282  
14,124.371,rs4983559,0.288  
14,124.425,rs4983561,0.336  
14,124.493,rs1048257,0.321  
14,124.684,rs2091918,0.253  
14,124.724,rs11625865,0.250  
14,124.986,rs4983411,0.229  
14,125.001,rs9671696,0.229  
14,126.306,rs10149476,0.337  
15,6.099,rs12915528,-0.869  
15,6.231,rs8029691,-0.846  
15,6.276,rs1544285,-0.837  
15,6.318,rs2289815,-0.807  
15,6.422,rs7175101,-0.771  
15,6.440,rs12907198,-0.714  
15,6.469,rs11634023,-0.739  
15,6.524,rs12594495,-0.769  
15,6.567,rs4778471,-0.775  
15,6.675,rs3693,-0.779  
15,6.718,rs7170784,-0.740  
15,6.770,rs4778334,-0.864  
15,6.773,rs12439636,-0.871  
15,6.778,rs7181789,-1.001  
15,6.781,rs3812923,-1.008  
15,6.786,rs6606823,-1.018  
15,6.804,rs4778575,-1.043  
15,6.868,rs12900552,-0.974  
15,7.260,rs3883043,-0.897  
15,8.428,rs8023331,-1.222  
15,8.485,rs4778531,-1.221  
15,8.596,rs1526175,-1.230  
15,8.652,rs11638266,-1.244  
15,8.705,rs4778560,-1.162  
15,8.902,rs10873623,-1.175  
15,8.957,rs6576525,-1.166  
15,9.119,rs7181128,-1.152  
15,9.289,rs17116917,-1.009  
15,9.472,rs1722791,-0.873  
15,9.581,rs8025564,-0.812  
15,9.882,rs940595,-0.640  
15,9.923,rs8038234,-0.585  
15,9.926,rs824209,-0.588  
15,10.130,rs4778340,-0.568  
15,10.210,rs10519445,-0.570  
15,10.361,rs10162946,-0.563  
15,10.562,rs8041086,-0.587  
15,10.690,rs2353499,-0.541  
15,10.789,rs4778272,-0.511  
15,11.070,rs7179664,-0.476  
15,11.112,rs1850475,-0.478  
15,11.320,rs12161938,-0.486  
15,12.195,rs6576326,-0.463  
15,12.550,rs4906706,-0.445  
15,12.725,rs17114621,-0.409

15,12.842,rs8034405,-0.393  
15,12.903,rs12913093,-0.342  
15,12.981,rs17114774,-0.374  
15,13.111,rs736008,-0.322  
15,13.133,rs7164989,-0.326  
15,13.212,rs12592215,-0.283  
15,13.235,rs3867499,-0.265  
15,13.298,rs2030062,-0.257  
15,13.349,rs2201839,-0.271  
15,13.358,rs8037745,-0.283  
15,13.375,rs7175782,-0.292  
15,13.406,rs12438586,-0.295  
15,13.427,rs17114848,-0.301  
15,13.441,rs2075814,-0.304  
15,13.470,rs2647364,-0.291  
15,13.481,rs2736705,-0.281  
15,13.683,rs705,-0.229  
15,14.337,rs691,-0.217  
15,14.408,rs2714717,-0.214  
15,14.459,rs7497265,-0.213  
15,14.488,rs2739826,-0.213  
15,15.460,rs11637057,-0.220  
15,15.530,rs12903486,-0.223  
15,15.555,rs1000040,-0.220  
15,15.624,rs718979,-0.215  
15,15.624,rs718980,-0.215  
15,15.743,rs2605463,-0.166  
15,15.776,rs1008531,-0.167  
15,15.831,rs2341140,-0.157  
15,15.907,rs2925260,-0.144  
15,16.000,rs2930648,-0.134  
15,16.057,rs7179423,-0.142  
15,16.066,rs2066710,-0.154  
15,16.176,rs744280,-0.143  
15,16.185,rs2014069,-0.144  
15,16.193,rs4906624,-0.146  
15,16.258,rs8027096,-0.132  
15,16.325,rs11161217,-0.159  
15,16.344,rs17637182,-0.157  
15,16.369,rs8036650,-0.155  
15,16.379,rs12595426,-0.154  
15,16.403,rs8039801,-0.155  
15,16.519,rs12101499,-0.162  
15,16.569,rs11637218,-0.164  
15,16.607,rs7166725,-0.170  
15,16.645,rs8031393,-0.175  
15,16.669,rs12324398,-0.196  
15,16.677,rs8043094,-0.198  
15,16.688,rs4260026,-0.200  
15,16.802,rs7173059,-0.158  
15,16.832,rs11161254,-0.146  
15,16.844,rs4906809,-0.130  
15,16.845,rs1811753,-0.111  
15,16.847,rs12148810,-0.096  
15,16.849,rs11858322,-0.090  
15,16.942,rs12903744,-0.071  
15,16.978,rs17116451,-0.065  
15,16.999,rs1511487,-0.063  
15,17.064,rs12437822,-0.066  
15,17.079,rs17736307,-0.063  
15,17.101,rs4906838,-0.059



15,17.161,rs17644252,-0.067  
15,17.338,rs8025577,-0.060  
15,17.364,rs1880028,-0.059  
15,17.420,rs9806314,-0.073  
15,17.496,rs4906866,-0.090  
15,17.552,rs573075,-0.089  
15,17.622,rs7180612,-0.097  
15,17.726,rs2573690,-0.088  
15,17.880,rs2573695,-0.082  
15,17.949,rs4076021,-0.086  
15,17.997,rs7171237,-0.091  
15,18.114,rs10519545,-0.106  
15,18.137,rs8038232,-0.112  
15,18.178,rs11161304,-0.123  
15,18.269,rs4906879,-0.111  
15,18.300,rs2059637,-0.092  
15,18.427,rs2912600,-0.106  
15,18.504,rs1593609,-0.117  
15,18.706,rs4906679,-0.094  
15,18.918,rs7173713,-0.060  
15,18.989,rs7172653,-0.048  
15,19.060,rs754661,-0.037  
15,19.080,rs17738278,-0.036  
15,19.246,rs8024864,-0.028  
15,19.359,rs11161341,-0.024  
15,19.393,rs4613037,-0.024  
15,19.410,rs6576622,-0.025  
15,19.412,rs12441474,-0.025  
15,19.813,rs140685,-0.001  
15,19.894,rs7403021,0.000  
15,19.998,rs1368022,0.007  
15,20.083,rs7177870,0.007  
15,20.087,rs8023912,0.006  
15,20.124,rs1011455,0.004  
15,20.143,rs7494955,0.006  
15,20.160,rs6606866,0.005  
15,20.288,rs6606873,0.008  
15,20.357,rs1029938,0.010  
15,20.469,rs7402147,0.012  
15,20.514,rs17671946,0.014  
15,20.611,rs9972391,0.029  
15,20.622,rs6606888,0.032  
15,20.623,rs7173587,0.032  
15,20.627,rs7495580,0.032  
15,20.696,rs17137727,0.028  
15,20.757,rs1551419,0.033  
15,20.797,rs6606897,0.032  
15,21.036,rs4238490,0.020  
15,21.087,rs9920954,0.022  
15,21.116,rs12913576,0.017  
15,21.125,rs7167588,0.014  
15,21.167,rs4778147,0.009  
15,21.290,rs1382056,0.003  
15,21.343,rs3098545,0.002  
15,21.346,rs3098547,0.002  
15,21.359,rs17565175,0.003  
15,21.371,rs1871017,0.003  
15,21.401,rs3097531,0.005  
15,21.435,rs3101649,0.006  
15,21.438,rs12592963,0.006  
15,21.459,rs3110483,0.006

15,21.491,rs1107267,0.003  
15,21.525,rs11633934,0.002  
15,21.526,rs4312267,0.002  
15,21.553,rs4778179,0.002  
15,21.627,rs4778192,0.005  
15,21.655,rs4778199,0.007  
15,21.731,rs977588,0.015  
15,21.821,rs2871875,0.010  
15,21.838,rs4778232,0.007  
15,21.926,rs7183877,0.009  
15,22.649,rs1490078,0.000  
15,22.650,rs1873282,0.000  
15,22.654,rs4603522,0.000  
15,23.467,rs3751562,0.003  
15,23.526,rs2306933,0.003  
15,23.754,rs4779853,0.003  
15,23.817,rs11858397,0.004  
15,23.835,rs4420502,0.005  
15,24.630,rs10519634,0.042  
15,24.653,rs7163518,0.015  
15,24.660,rs1459361,0.005  
15,24.670,rs7171078,0.007  
15,24.738,rs260546,0.011  
15,24.768,rs16955651,0.012  
15,24.824,rs3784353,0.010  
15,24.942,rs12916064,0.004  
15,25.084,rs785442,0.001  
15,25.113,rs785426,0.000  
15,25.179,rs1357386,-0.000  
15,25.193,rs7182831,-0.000  
15,25.228,rs2049259,-0.000  
15,25.293,rs11070233,0.000  
15,25.313,rs8035969,0.000  
15,25.350,rs3923926,0.000  
15,25.379,rs8036260,0.001  
15,25.411,rs10152753,0.001  
15,26.455,rs12905321,-0.002  
15,27.641,rs2949576,-0.001  
15,28.126,rs4779814,-0.007  
15,28.556,rs4779829,-0.008  
15,28.726,rs813299,-0.021  
15,28.878,rs7178760,-0.033  
15,28.887,rs6493540,-0.034  
15,29.031,rs7162289,-0.031  
15,29.042,rs11070914,-0.032  
15,29.214,rs7169662,-0.010  
15,29.273,rs4779521,-0.008  
15,29.282,rs4268714,-0.008  
15,29.416,rs8039613,-0.011  
15,29.575,rs7164892,-0.016  
15,29.689,rs17228387,-0.017  
15,30.259,rs8037451,-0.014  
15,30.459,rs4238558,-0.013  
15,30.552,rs4779937,-0.022  
15,30.600,rs10519712,-0.013  
15,30.708,rs4779948,-0.004  
15,30.796,rs1514260,-0.005  
15,30.875,rs11071503,-0.007  
15,31.010,rs6494223,-0.006  
15,31.035,rs13329490,-0.011  
15,32.172,rs11632524,0.014

15,32.190,rs11635997,0.014  
15,32.230,rs8023613,0.020  
15,32.259,rs11634086,0.025  
15,32.304,rs1997316,0.022  
15,32.308,rs7494781,0.022  
15,32.496,rs2077680,0.035  
15,32.521,rs7180433,0.036  
15,32.527,rs8036757,0.036  
15,32.569,rs12905294,0.032  
15,32.674,rs4780052,0.057  
15,32.684,rs12917529,0.058  
15,32.751,rs12912842,0.076  
15,32.769,rs12904870,0.095  
15,32.884,rs2597094,0.101  
15,32.902,rs1871362,0.098  
15,32.905,rs343918,0.098  
15,32.933,rs345827,0.070  
15,32.945,rs345850,0.060  
15,32.972,rs182951,0.052  
15,33.026,rs17235554,0.062  
15,33.062,rs345803,0.059  
15,33.114,rs12910096,0.053  
15,33.143,rs2468756,0.050  
15,33.187,rs11633650,0.034  
15,33.254,rs974379,0.023  
15,33.278,rs11072340,0.017  
15,33.281,rs11638698,0.018  
15,33.282,rs12443212,0.018  
15,33.285,rs11072342,0.023  
15,33.292,rs8025470,0.039  
15,33.292,rs2292547,0.040  
15,33.320,rs8027453,0.045  
15,33.356,rs13329628,0.042  
15,33.371,rs7173234,0.044  
15,33.407,rs2251110,0.053  
15,33.413,rs2292728,0.054  
15,33.435,rs16969325,0.054  
15,33.472,rs16969847,0.054  
15,33.482,rs1343900,0.054  
15,33.537,rs2676055,0.062  
15,33.550,rs2676049,0.041  
15,33.551,rs2596193,0.030  
15,33.606,rs2596230,0.024  
15,33.632,rs8023659,0.027  
15,33.661,rs2033610,0.032  
15,33.703,rs12324605,0.031  
15,33.722,rs2596210,0.027  
15,33.724,rs1435110,0.026  
15,33.738,rs7165389,0.023  
15,33.764,rs2596220,0.019  
15,33.813,rs1865495,0.020  
15,33.866,rs658750,0.021  
15,33.899,rs8034012,0.022  
15,33.943,rs4238567,0.019  
15,33.952,rs10775211,0.007  
15,34.008,rs4779631,0.019  
15,34.015,rs716368,0.031  
15,34.056,rs6495218,0.026  
15,34.058,rs8028974,0.026  
15,34.077,rs12906709,0.022  
15,34.085,rs11635223,0.021

15,34.087,rs6495228,0.021  
15,34.091,rs891345,0.022  
15,34.093,rs7165379,0.022  
15,34.138,rs12148238,0.035  
15,34.169,rs7165052,0.030  
15,34.194,rs11855625,0.037  
15,34.247,rs2288611,0.040  
15,34.260,rs1560318,0.039  
15,34.269,rs2059956,0.039  
15,34.359,rs1477436,0.044  
15,34.396,rs10152468,0.046  
15,34.534,rs519152,0.072  
15,34.560,rs603152,0.077  
15,34.743,rs16958780,0.136  
15,34.763,rs12900743,0.140  
15,34.793,rs12908333,0.140  
15,34.987,rs2705343,0.125  
15,35.151,rs347797,0.136  
15,35.155,rs442873,0.136  
15,35.163,rs2279685,0.137  
15,35.172,rs2279686,0.138  
15,35.651,rs1436918,0.157  
15,35.691,rs1436911,0.154  
15,35.788,rs672382,0.139  
15,35.850,rs664251,0.140  
15,35.879,rs573441,0.122  
15,35.909,rs746216,0.101  
15,35.934,rs6495717,0.082  
15,36.010,rs1055356,0.086  
15,36.296,rs8032009,0.106  
15,36.330,rs8031878,0.110  
15,36.342,rs12902095,0.093  
15,36.348,rs10162694,0.087  
15,36.374,rs2339777,0.083  
15,36.379,rs8039278,0.082  
15,36.401,rs730493,0.085  
15,36.431,rs16960370,0.088  
15,36.808,rs2197412,0.054  
15,37.019,rs17585880,0.067  
15,37.052,rs11638250,0.083  
15,37.177,rs1020307,0.106  
15,37.354,rs12595392,0.148  
15,37.382,rs319884,0.157  
15,37.473,rs2879653,0.171  
15,37.490,rs8038211,0.185  
15,37.525,rs2647672,0.213  
15,37.526,rs2256109,0.211  
15,37.559,rs1027486,0.213  
15,37.700,rs1566173,0.270  
15,37.737,rs1497815,0.285  
15,37.743,rs789777,0.284  
15,37.753,rs11638423,0.268  
15,37.764,rs1397255,0.267  
15,37.765,rs6495809,0.265  
15,37.774,rs1510385,0.229  
15,37.793,rs4923705,0.247  
15,37.826,rs17619758,0.245  
15,37.852,rs1946706,0.243  
15,37.928,rs17630276,0.267  
15,37.929,rs1435681,0.267  
15,37.958,rs16962756,0.245

15,37.985,rs7495602,0.228  
15,37.985,rs1517878,0.228  
15,37.989,rs10518868,0.227  
15,38.005,rs4923709,0.207  
15,38.010,rs2381780,0.200  
15,38.028,rs8028529,0.173  
15,38.032,rs4924057,0.172  
15,38.043,rs7170927,0.176  
15,38.062,rs11857344,0.167  
15,38.063,rs7180805,0.166  
15,38.074,rs896994,0.159  
15,38.092,rs16963122,0.153  
15,38.196,rs12899716,0.169  
15,38.627,rs6495864,0.174  
15,38.680,rs4923723,0.168  
15,38.843,rs2041849,0.144  
15,39.204,rs11073204,0.123  
15,39.323,rs1450418,0.118  
15,39.338,rs8036552,0.117  
15,39.344,rs16964235,0.117  
15,39.347,rs12595046,0.109  
15,39.348,rs17432433,0.105  
15,39.366,rs1450414,0.108  
15,39.383,rs11853132,0.076  
15,39.415,rs1450417,0.102  
15,39.434,rs4640136,0.098  
15,39.456,rs12439749,0.072  
15,39.484,rs16964327,0.071  
15,39.561,rs1376071,0.085  
15,39.620,rs16964414,0.081  
15,39.664,rs8034391,0.079  
15,39.683,rs940093,0.078  
15,39.797,rs4924117,0.073  
15,39.804,rs2030592,0.074  
15,39.857,rs4989607,0.105  
15,39.891,rs8041675,0.088  
15,40.033,rs1464284,0.095  
15,40.120,rs16954380,0.100  
15,40.134,rs2701516,0.102  
15,40.145,rs11073224,0.103  
15,40.252,rs3108784,0.122  
15,40.388,rs16964798,0.129  
15,40.428,rs8028213,0.130  
15,40.594,rs1401895,0.126  
15,40.652,rs11632275,0.140  
15,40.699,rs1520959,0.136  
15,40.912,rs624991,0.142  
15,41.391,rs17447142,0.114  
15,41.773,rs4483815,0.119  
15,41.851,rs8039764,0.116  
15,41.873,rs972894,0.128  
15,41.898,rs16965467,0.154  
15,41.958,rs16965475,0.171  
15,42.181,rs5025837,0.255  
15,42.252,rs1108081,0.271  
15,42.358,rs4924198,0.268  
15,42.370,rs8041665,0.268  
15,42.434,rs8033434,0.281  
15,42.444,rs8030904,0.285  
15,42.471,rs12594922,0.301  
15,42.476,rs1502404,0.305

15,42.510,rs7496477,0.346  
15,42.580,rs4505261,0.411  
15,42.627,rs1393418,0.623  
15,42.630,rs10520077,0.648  
15,42.670,rs7182018,1.132  
15,42.676,rs11638546,1.194  
15,42.680,rs11070197,1.217  
15,42.684,rs8043207,1.159  
15,42.713,rs936532,1.085  
15,42.761,rs1994379,1.006  
15,42.767,rs2664135,0.995  
15,42.789,rs661197,0.935  
15,42.794,rs275721,0.921  
15,42.802,rs1436274,0.880  
15,42.809,rs1836847,0.862  
15,42.822,rs486816,0.828  
15,42.844,rs3207297,0.750  
15,42.848,rs8042947,0.745  
15,42.860,rs16970325,0.725  
15,42.861,rs12913170,0.725  
15,42.864,rs11858141,0.712  
15,42.881,rs1565866,0.720  
15,42.899,rs1017843,0.842  
15,42.901,rs8034964,0.847  
15,42.902,rs2306480,0.807  
15,42.903,rs2277562,0.767  
15,42.911,rs4924445,0.828  
15,42.927,rs1898885,0.909  
15,42.928,rs4605132,0.969  
15,42.935,rs11630119,0.925  
15,42.948,rs2034650,0.850  
15,42.956,rs3803357,0.816  
15,43.047,rs7915,0.591  
15,43.072,rs12592197,0.557  
15,43.080,rs6492971,0.548  
15,43.125,rs1678750,0.501  
15,43.232,rs721772,0.465  
15,43.323,rs1618332,0.453  
15,43.330,rs1621597,0.449  
15,43.332,rs8043408,0.447  
15,43.333,rs17687331,0.444  
15,43.337,rs8035074,0.397  
15,43.345,rs1614300,0.395  
15,43.357,rs2724938,0.402  
15,43.368,rs800719,0.399  
15,43.376,rs8028204,0.392  
15,43.386,rs650392,0.391  
15,43.387,rs1356410,0.425  
15,43.388,rs11858217,0.423  
15,43.388,rs4923929,0.423  
15,43.420,rs2277533,0.393  
15,43.472,rs8033734,0.397  
15,43.747,rs6493065,0.418  
15,44.426,rs8040336,0.462  
15,44.617,rs7178452,0.466  
15,44.716,rs6493094,0.464  
15,45.368,rs7172106,0.444  
15,45.383,rs2453274,0.444  
15,45.495,rs2556568,0.448  
15,45.627,rs3759871,0.449  
15,45.816,rs2462043,0.501

15,45.830,rs1720727,0.502  
15,45.852,rs4485326,0.460  
15,46.094,rs12902975,0.406  
15,46.167,rs11636774,0.407  
15,46.241,rs1648282,0.409  
15,46.263,rs1648290,0.411  
15,46.391,rs12909221,0.442  
15,46.468,rs2733250,0.456  
15,46.506,rs6493166,0.463  
15,46.515,rs10643,0.464  
15,46.544,rs951295,0.467  
15,46.586,rs17629768,0.469  
15,46.595,rs588590,0.469  
15,46.701,rs4774770,0.474  
15,46.886,rs11852360,0.471  
15,46.966,rs2460626,0.477  
15,47.456,rs4775254,0.481  
15,47.488,rs2075,0.479  
15,47.504,rs10459609,0.480  
15,47.588,rs17653050,0.409  
15,47.612,rs12441691,0.408  
15,47.649,rs7181951,0.407  
15,47.656,rs8039174,0.408  
15,47.804,rs2043179,0.427  
15,47.902,rs1516843,0.418  
15,47.905,rs11630435,0.420  
15,47.944,rs1996671,0.455  
15,47.955,rs12592760,0.458  
15,48.059,rs16957825,0.487  
15,48.108,rs17268264,0.502  
15,48.285,rs12442708,0.537  
15,48.300,rs17271669,0.539  
15,48.350,rs11070553,0.537  
15,48.554,rs1588913,0.518  
15,48.598,rs921764,0.501  
15,48.658,rs6493270,0.438  
15,48.711,rs2433020,0.358  
15,48.714,rs281215,0.355  
15,48.740,rs16959540,0.347  
15,48.823,rs1898110,0.310  
15,48.935,rs671434,0.255  
15,48.938,rs645856,0.253  
15,48.967,rs8037500,0.308  
15,48.968,rs6493299,0.312  
15,48.977,rs633868,0.363  
15,49.011,rs549368,0.372  
15,49.013,rs682567,0.372  
15,49.064,rs2924578,0.433  
15,49.087,rs2470104,0.437  
15,49.097,rs2433363,0.439  
15,49.112,rs10519163,0.455  
15,49.127,rs2469592,0.472  
15,49.305,rs12050562,0.415  
15,49.353,rs11635140,0.404  
15,49.458,rs16961323,0.357  
15,49.485,rs17463995,0.355  
15,49.489,rs2413913,0.355  
15,49.490,rs784414,0.355  
15,49.543,rs2899423,0.367  
15,49.568,rs12906456,0.371  
15,49.580,rs10519192,0.372

15,49.596,rs16961815,0.379  
15,49.607,rs12593599,0.381  
15,49.614,rs11070664,0.381  
15,49.620,rs10851473,0.378  
15,49.625,rs11070668,0.375  
15,49.630,rs4775789,0.371  
15,49.632,rs11070670,0.407  
15,49.649,rs8037958,0.362  
15,49.929,rs11634375,0.317  
15,49.983,rs10220770,0.306  
15,50.043,rs12906463,0.294  
15,50.065,rs691552,0.289  
15,50.098,rs10519239,0.295  
15,50.125,rs7182178,0.300  
15,50.177,rs9806676,0.351  
15,50.393,rs8024247,0.359  
15,50.906,rs2306331,0.346  
15,51.417,rs9972359,0.307  
15,51.527,rs7167343,0.298  
15,51.543,rs2470152,0.297  
15,51.553,rs3751591,0.296  
15,51.617,rs2445738,0.323  
15,51.620,rs12899040,0.307  
15,51.923,rs544023,0.208  
15,52.198,rs7177328,0.190  
15,52.384,rs6493546,0.185  
15,52.426,rs4496072,0.168  
15,52.447,rs3751624,0.159  
15,52.469,rs12050717,0.154  
15,52.471,rs1045699,0.154  
15,52.477,rs17613475,0.153  
15,52.520,rs10518683,0.155  
15,52.559,rs8024439,0.158  
15,52.830,rs8035237,0.180  
15,52.838,rs8031716,0.181  
15,52.854,rs12437920,0.187  
15,52.855,rs8034464,0.187  
15,52.886,rs2440332,0.184  
15,53.012,rs17626394,0.155  
15,53.077,rs7176525,0.137  
15,53.184,rs8025430,0.125  
15,53.333,rs4774658,0.127  
15,53.347,rs12148511,0.125  
15,53.374,rs1027010,0.121  
15,53.413,rs4774662,0.081  
15,53.416,rs1021747,0.086  
15,53.419,rs12911817,0.108  
15,53.426,rs624613,0.117  
15,53.449,rs2055407,0.106  
15,53.450,rs1607023,0.108  
15,53.460,rs12595143,0.122  
15,53.487,rs957284,0.102  
15,53.522,rs7178887,0.091  
15,53.560,rs4774673,0.080  
15,53.610,rs2126190,0.089  
15,53.625,rs2711584,0.092  
15,53.663,rs2616894,0.118  
15,53.672,rs2616879,0.115  
15,53.687,rs1478190,0.109  
15,53.688,rs17633184,0.110  
15,53.706,rs2616915,0.108



15,53.723,rs2115827,0.132  
15,53.724,rs2163196,0.113  
15,53.733,rs2115825,0.109  
15,53.742,rs10518754,0.110  
15,53.747,rs1897023,0.109  
15,53.780,rs12591326,0.126  
15,53.814,rs8038935,0.124  
15,53.816,rs8027528,0.126  
15,53.827,rs11071063,0.136  
15,53.840,rs12917198,0.145  
15,53.867,rs16974503,0.170  
15,53.869,rs1158075,0.172  
15,53.882,rs4774692,0.180  
15,53.918,rs11857095,0.193  
15,53.995,rs2553226,0.206  
15,53.997,rs1850999,0.206  
15,54.011,rs1851006,0.204  
15,54.060,rs4500668,0.195  
15,54.092,rs8029702,0.197  
15,54.108,rs992348,0.198  
15,54.118,rs7182653,0.197  
15,54.124,rs2721129,0.180  
15,54.127,rs2414385,0.146  
15,54.218,rs1879337,0.112  
15,54.326,rs7181383,0.109  
15,54.380,rs11858741,0.132  
15,54.382,rs12594750,0.133  
15,54.496,rs6493767,0.145  
15,54.520,rs8042411,0.147  
15,54.547,rs16976187,0.149  
15,54.585,rs11071175,0.151  
15,54.587,rs10518808,0.152  
15,54.857,rs4447360,0.143  
15,54.911,rs11071188,0.117  
15,55.732,rs6493819,0.039  
15,55.758,rs4774822,0.031  
15,55.778,rs11071215,0.027  
15,55.809,rs11631355,0.029  
15,56.233,rs10518827,0.026  
15,56.472,rs2036741,0.024  
15,56.486,rs12907507,0.024  
15,56.489,rs12595720,0.038  
15,56.490,rs11071240,0.034  
15,56.498,rs12913391,0.034  
15,56.853,rs2718946,0.033  
15,57.340,rs1426065,0.032  
15,58.149,rs1715919,0.021  
15,58.200,rs11856746,0.020  
15,58.927,rs10518870,0.007  
15,59.399,rs2615233,0.008  
15,59.679,rs2440943,0.006  
15,59.747,rs735609,0.008  
15,59.749,rs8033575,0.008  
15,59.771,rs7177670,0.009  
15,59.810,rs1664454,0.013  
15,59.820,rs2440968,0.015  
15,59.894,rs1280400,0.050  
15,59.913,rs1018268,0.046  
15,59.915,rs3817186,0.045  
15,59.921,rs1280416,0.043  
15,59.928,rs1511951,0.040

15,59.930,rs4774942,0.039  
15,59.946,rs2932195,0.038  
15,59.953,rs2922220,0.038  
15,60.020,rs2942046,0.034  
15,60.076,rs766103,0.031  
15,60.095,rs4774964,0.032  
15,60.097,rs16977601,0.032  
15,60.125,rs2453088,0.031  
15,60.194,rs12442987,0.026  
15,60.219,rs11635989,0.024  
15,60.254,rs2554041,0.028  
15,60.260,rs11071339,0.029  
15,60.333,rs8026018,0.019  
15,60.374,rs2197092,0.017  
15,60.592,rs4238328,0.010  
15,60.710,rs2704230,0.008  
15,60.829,rs16939816,0.006  
15,60.903,rs1618930,0.007  
15,60.939,rs9920375,0.005  
15,61.040,rs2899620,0.004  
15,61.068,rs938508,0.003  
15,61.098,rs7179609,0.003  
15,61.164,rs17821171,0.003  
15,61.224,rs7172930,0.003  
15,61.333,rs4775035,0.001  
15,61.379,rs473422,0.001  
15,61.395,rs371125,0.001  
15,61.428,rs7164909,0.001  
15,61.438,rs415799,0.001  
15,61.476,rs414846,0.000  
15,61.509,rs4774297,-0.006  
15,61.533,rs6494006,-0.009  
15,61.556,rs573922,-0.011  
15,61.586,rs934297,-0.010  
15,61.627,rs4775053,-0.012  
15,61.650,rs1869138,-0.014  
15,61.703,rs4613005,-0.017  
15,61.727,rs7162855,-0.020  
15,61.771,rs8039477,-0.025  
15,62.610,rs8037673,-0.007  
15,62.784,rs10518996,-0.005  
15,62.805,rs11631644,-0.005  
15,62.927,rs17269545,-0.006  
15,62.949,rs11852359,-0.007  
15,62.961,rs11634752,-0.007  
15,62.986,rs11855027,-0.014  
15,63.085,rs747723,-0.026  
15,63.092,rs1017888,-0.027  
15,63.182,rs16941384,-0.046  
15,63.213,rs12902190,-0.054  
15,63.229,rs11855974,-0.057  
15,63.258,rs11638680,-0.058  
15,63.381,rs4775175,-0.062  
15,63.392,rs17302400,-0.061  
15,63.454,rs4775187,-0.044  
15,63.487,rs6494120,-0.024  
15,63.627,rs8026404,-0.012  
15,63.711,rs965355,-0.001  
15,63.803,rs16941815,0.005  
15,63.817,rs4775214,0.006  
15,63.821,rs893272,0.007

15,63.903,rs4519291,0.014  
15,63.931,rs7175060,0.015  
15,63.937,rs2912108,0.023  
15,63.986,rs1425933,0.017  
15,64.015,rs8025697,0.013  
15,64.090,rs1481838,0.013  
15,64.223,rs8026117,0.021  
15,64.318,rs338415,0.021  
15,64.721,rs12910118,0.026  
15,64.778,rs2899656,0.031  
15,64.845,rs9920533,0.029  
15,64.847,rs3759911,0.029  
15,64.891,rs3068,0.034  
15,65.034,rs10431796,0.049  
15,65.048,rs2162069,0.053  
15,65.136,rs339996,0.086  
15,65.141,rs339998,0.084  
15,65.184,rs4775287,0.084  
15,65.197,rs13329238,0.064  
15,65.212,rs6494219,0.071  
15,65.215,rs6494221,0.078  
15,65.220,rs1820357,0.089  
15,65.271,rs7164773,0.084  
15,65.272,rs12438866,0.084  
15,65.273,rs922782,0.085  
15,65.356,rs7165718,0.110  
15,65.408,rs7175883,0.133  
15,65.410,rs8042149,0.133  
15,65.497,rs10519085,0.132  
15,65.557,rs341387,0.133  
15,65.622,rs877863,0.139  
15,65.625,rs16943299,0.138  
15,65.640,rs2899664,0.137  
15,65.642,rs2062091,0.137  
15,65.656,rs6494231,0.138  
15,65.679,rs4775319,0.175  
15,65.681,rs10220727,0.173  
15,65.691,rs1523527,0.164  
15,65.692,rs4775340,0.168  
15,65.696,rs10519096,0.149  
15,65.697,rs17204770,0.146  
15,65.697,rs10519099,0.144  
15,65.707,rs12443239,0.153  
15,65.713,rs10152427,0.159  
15,65.713,rs16943579,0.159  
15,65.715,rs782907,0.157  
15,65.715,rs4774386,0.156  
15,65.723,rs8032023,0.145  
15,65.727,rs1159814,0.142  
15,65.727,rs4775362,0.143  
15,65.734,rs1465812,0.128  
15,65.734,rs4774388,0.128  
15,65.740,rs10851691,0.128  
15,65.758,rs4350520,0.141  
15,65.767,rs7174511,0.123  
15,65.776,rs4506837,0.105  
15,65.779,rs12906076,0.097  
15,65.796,rs7161784,0.089  
15,65.798,rs4775407,0.071  
15,65.800,rs8030303,0.063  
15,65.804,rs4613008,0.050

15,65.806,rs4775411,0.049  
15,65.807,rs7166393,0.047  
15,65.829,rs11854700,0.031  
15,65.845,rs2243932,0.023  
15,65.848,rs2414739,0.023  
15,65.975,rs12909360,0.034  
15,66.014,rs2133093,0.023  
15,66.134,rs11635027,0.021  
15,66.177,rs8026446,0.015  
15,66.310,rs8033596,0.007  
15,66.323,rs543651,0.005  
15,66.333,rs8031441,0.004  
15,66.340,rs16946204,0.004  
15,66.344,rs902031,0.004  
15,66.344,rs16946249,0.004  
15,66.346,rs8029221,0.004  
15,66.348,rs16946318,0.004  
15,66.379,rs920864,0.005  
15,66.394,rs1444407,0.010  
15,66.416,rs16946959,0.006  
15,66.421,rs11632075,0.006  
15,66.422,rs809926,0.006  
15,66.440,rs11071754,0.006  
15,66.498,rs11632919,0.012  
15,66.832,rs11631933,0.023  
15,66.917,rs7169989,0.024  
15,67.536,rs8030264,0.031  
15,68.046,rs332271,0.047  
15,68.437,rs11633399,0.052  
15,68.692,rs4287512,0.044  
15,68.772,rs16948440,0.043  
15,68.890,rs7175761,0.043  
15,69.228,rs920686,0.029  
15,69.410,rs626163,0.028  
15,69.421,rs639812,0.028  
15,69.479,rs1442796,0.028  
15,69.509,rs7182756,0.042  
15,69.518,rs2280345,0.049  
15,69.531,rs11071841,0.060  
15,69.536,rs2277582,0.063  
15,69.552,rs668278,0.067  
15,69.742,rs352480,0.059  
15,70.088,rs17810074,0.046  
15,70.126,rs934542,0.046  
15,70.566,rs333557,0.077  
15,70.672,rs333583,0.073  
15,70.760,rs8035662,0.082  
15,70.831,rs4776735,0.102  
15,70.841,rs17241929,0.106  
15,70.882,rs12441502,0.143  
15,70.895,rs12903880,0.157  
15,70.902,rs4776752,0.164  
15,70.919,rs4776756,0.175  
15,70.958,rs7164231,0.202  
15,70.965,rs12904629,0.202  
15,70.997,rs1466434,0.202  
15,71.144,rs8040520,0.197  
15,72.051,rs16953566,0.156  
15,72.058,rs11857642,0.155  
15,72.143,rs2469094,0.149  
15,72.291,rs8024414,0.139

15,72.327,rs11638893,0.136  
15,72.413,rs2469141,0.148  
15,72.421,rs8042883,0.148  
15,72.442,rs8031639,0.149  
15,72.621,rs755451,0.159  
15,72.688,rs7173030,0.167  
15,72.815,rs12906576,0.144  
15,74.656,rs1982647,0.126  
15,74.664,rs4306451,0.125  
15,74.992,rs11636387,0.125  
15,75.213,rs4777016,0.126  
15,75.752,rs17317291,0.138  
15,75.913,rs7172340,0.142  
15,75.978,rs7168991,0.143  
15,76.033,rs964691,0.141  
15,76.057,rs898582,0.139  
15,76.074,rs3784351,0.160  
15,76.229,rs4777048,0.197  
15,76.257,rs12050670,0.214  
15,76.269,rs7169854,0.200  
15,76.276,rs8036698,0.135  
15,76.277,rs16952059,0.134  
15,76.282,rs895135,0.130  
15,76.318,rs8041354,0.115  
15,76.338,rs990751,0.115  
15,76.362,rs1373698,0.115  
15,76.371,rs2007265,0.116  
15,76.373,rs895127,0.116  
15,76.435,rs1465997,0.121  
15,76.484,rs11633874,0.149  
15,76.498,rs2046925,0.146  
15,76.548,rs10518781,0.167  
15,76.575,rs7172123,0.138  
15,76.585,rs4261473,0.135  
15,76.629,rs7164503,0.130  
15,76.857,rs1699221,0.136  
15,76.897,rs311917,0.132  
15,77.121,rs8038216,0.095  
15,77.427,rs10162653,0.086  
15,77.443,rs11853067,0.086  
15,77.453,rs1115635,0.085  
15,77.466,rs4777169,0.083  
15,77.470,rs4777170,0.083  
15,77.523,rs4777183,0.082  
15,77.546,rs17315418,0.071  
15,77.571,rs9788746,0.048  
15,77.588,rs10518837,0.037  
15,77.588,rs186248,0.037  
15,77.591,rs12905468,0.037  
15,77.617,rs12442208,0.065  
15,77.635,rs305024,0.086  
15,77.641,rs11072122,0.068  
15,77.656,rs305002,0.103  
15,77.679,rs2415060,0.117  
15,77.697,rs415642,0.128  
15,77.702,rs12591142,0.129  
15,77.720,rs2679623,0.135  
15,77.721,rs2415062,0.136  
15,77.737,rs4617810,0.142  
15,77.782,rs2415071,0.162  
15,77.798,rs939042,0.176

15,77.820,rs4777221,0.189  
15,77.841,rs12594386,0.194  
15,77.842,rs8035183,0.195  
15,77.848,rs3743309,0.182  
15,77.859,rs2133977,0.161  
15,77.870,rs7162712,0.158  
15,77.883,rs631864,0.148  
15,77.913,rs4777236,0.152  
15,77.927,rs869823,0.112  
15,77.937,rs11855650,0.127  
15,77.944,rs726193,0.122  
15,77.956,rs10152562,0.122  
15,77.961,rs2927401,0.121  
15,77.978,rs7180380,0.142  
15,77.978,rs1875329,0.142  
15,77.984,rs8030168,0.143  
15,78.020,rs8182084,0.132  
15,78.076,rs1971791,0.140  
15,78.168,rs907552,0.153  
15,78.187,rs4357890,0.159  
15,78.221,rs4777272,0.176  
15,78.232,rs925481,0.194  
15,78.252,rs12440755,0.224  
15,78.312,rs7162398,0.367  
15,78.370,rs1896439,0.440  
15,78.374,rs11072220,0.448  
15,78.378,rs1713551,0.449  
15,78.401,rs908341,0.398  
15,78.417,rs6494899,0.391  
15,78.457,rs961577,0.272  
15,78.516,rs11072268,0.238  
15,78.571,rs12916138,0.253  
15,78.626,rs2165488,0.265  
15,78.689,rs1866918,0.306  
15,78.702,rs4777391,0.312  
15,78.703,rs8037770,0.312  
15,78.715,rs12912393,0.310  
15,78.757,rs7167173,0.322  
15,78.789,rs8041762,0.355  
15,78.814,rs4777409,0.364  
15,78.891,rs4354882,0.333  
15,78.916,rs950667,0.365  
15,78.916,rs950668,0.363  
15,78.916,rs1875415,0.357  
15,78.924,rs12917055,0.313  
15,79.004,rs8033791,0.321  
15,79.154,rs7402189,0.326  
15,80.102,rs10518987,0.401  
15,80.119,rs16956917,0.402  
15,80.125,rs2706460,0.402  
15,80.134,rs16957064,0.403  
15,80.171,rs1284049,0.355  
15,80.190,rs7164592,0.373  
15,80.208,rs7163504,0.386  
15,80.226,rs1131854,0.367  
15,80.231,rs524457,0.368  
15,80.234,rs3784807,0.367  
15,80.237,rs2680344,0.369  
15,80.244,rs4362355,0.375  
15,80.272,rs7178269,0.405  
15,80.275,rs7497012,0.408

15,80.276,rs11633159,0.409  
15,80.287,rs3743098,0.431  
15,80.289,rs17773784,0.424  
15,80.293,rs746654,0.394  
15,80.309,rs2304721,0.381  
15,80.310,rs12442211,0.380  
15,80.320,rs10851869,0.360  
15,80.334,rs8033129,0.315  
15,80.335,rs11635599,0.315  
15,80.336,rs3848159,0.311  
15,80.341,rs351223,0.302  
15,80.347,rs9783698,0.275  
15,80.358,rs11632698,0.259  
15,80.745,rs2069522,0.229  
15,80.772,rs16972486,0.229  
15,80.831,rs6495122,0.224  
15,80.976,rs1561893,0.204  
15,81.626,rs11634402,0.153  
15,81.650,rs4073214,0.192  
15,81.717,rs4886456,0.172  
15,81.820,rs1394125,0.167  
15,82.579,rs17465692,0.148  
15,82.584,rs4075475,0.148  
15,82.787,rs12904384,0.136  
15,83.660,rs12904553,0.127  
15,83.840,rs11072660,0.132  
15,83.914,rs11856808,0.133  
15,84.277,rs4591100,0.137  
15,84.287,rs10468064,0.137  
15,84.740,rs12910083,0.168  
15,84.775,rs3784327,0.172  
15,84.831,rs1079396,0.177  
15,84.837,rs11072732,0.177  
15,84.888,rs2304826,0.181  
15,84.903,rs2304824,0.182  
15,84.917,rs17479135,0.186  
15,84.981,rs4887017,0.205  
15,84.986,rs11629576,0.207  
15,85.061,rs4887024,0.199  
15,85.103,rs7163689,0.198  
15,85.185,rs2013580,0.202  
15,85.288,rs2037349,0.178  
15,85.346,rs11072761,0.176  
15,85.346,rs11635084,0.176  
15,85.349,rs7172878,0.176  
15,85.394,rs7183034,0.180  
15,85.458,rs10519198,0.203  
15,85.489,rs2938673,0.208  
15,85.552,rs13180,0.199  
15,85.796,rs8192475,0.191  
15,85.833,rs3971872,0.189  
15,85.838,rs16970006,0.190  
15,85.848,rs8041377,0.190  
15,85.956,rs2277547,0.195  
15,86.008,rs4539564,0.207  
15,86.129,rs2870085,0.262  
15,86.164,rs3743195,0.260  
15,86.167,rs12914792,0.261  
15,86.198,rs11629786,0.224  
15,86.212,rs930538,0.208  
15,86.228,rs1373202,0.183

15,86.249,rs16970495,0.164  
15,86.252,rs12911414,0.151  
15,86.259,rs4778861,0.109  
15,86.273,rs7174521,0.108  
15,86.280,rs6495364,0.107  
15,86.329,rs2102999,0.129  
15,86.406,rs11630971,0.098  
15,86.416,rs2010516,0.096  
15,86.424,rs1865361,0.095  
15,86.437,rs4779008,0.095  
15,86.447,rs2030473,0.097  
15,86.460,rs7183358,0.100  
15,86.490,rs7163859,0.101  
15,86.606,rs12905004,0.132  
15,86.619,rs2010459,0.132  
15,86.663,rs925114,0.140  
15,86.693,rs4778696,0.139  
15,86.729,rs1046582,0.139  
15,86.823,rs1685168,0.163  
15,86.966,rs3893384,0.233  
15,87.035,rs12913164,0.328  
15,87.035,rs443394,0.329  
15,87.176,rs7177659,0.374  
15,87.195,rs2562744,0.374  
15,87.287,rs2562754,0.388  
15,87.330,rs8043397,0.376  
15,87.363,rs939970,0.316  
15,87.382,rs7164805,0.318  
15,87.430,rs7183862,0.302  
15,87.458,rs10519281,0.292  
15,87.500,rs8026959,0.283  
15,87.513,rs2114716,0.283  
15,87.597,rs2028120,0.293  
15,87.624,rs4384570,0.316  
15,87.631,rs1347648,0.322  
15,87.647,rs920197,0.302  
15,87.666,rs12594390,0.312  
15,87.726,rs7178382,0.346  
15,87.778,rs12901211,0.367  
15,87.817,rs7167062,0.372  
15,87.880,rs7178949,0.380  
15,87.930,rs11856676,0.386  
15,88.026,rs11072927,0.408  
15,88.030,rs11072930,0.408  
15,88.215,rs12437679,0.354  
15,88.219,rs3848178,0.395  
15,88.228,rs925111,0.295  
15,88.231,rs7174749,0.264  
15,88.236,rs4778856,0.274  
15,88.245,rs16972404,0.288  
15,88.275,rs7172022,0.267  
15,88.304,rs2135881,0.261  
15,88.315,rs1876435,0.268  
15,88.343,rs12905383,0.173  
15,88.351,rs7181726,0.159  
15,88.357,rs2271164,0.152  
15,88.375,rs11072961,0.159  
15,88.389,rs2903448,0.165  
15,88.438,rs3743040,0.183  
15,88.504,rs7174938,0.204  
15,88.506,rs8025381,0.191



15,88.510,rs4778871,0.172  
15,88.511,rs7178569,0.167  
15,88.597,rs1533055,0.111  
15,88.652,rs7176848,0.092  
15,88.653,rs6495544,0.092  
15,88.771,rs4778636,0.096  
15,88.802,rs4622471,0.090  
15,88.827,rs12907953,0.108  
15,88.847,rs4383094,0.117  
15,88.848,rs11634288,0.117  
15,88.877,rs8036982,0.111  
15,88.918,rs1564641,0.094  
15,88.941,rs7180338,0.095  
15,89.092,rs7168376,0.067  
15,89.093,rs4778930,0.067  
15,89.094,rs4778944,0.068  
15,89.094,rs4778945,0.068  
15,89.094,rs17258267,0.068  
15,89.097,rs957942,0.054  
15,89.098,rs2654227,0.054  
15,89.098,rs2654212,0.064  
15,89.098,rs2665115,0.064  
15,89.099,rs17699249,0.064  
15,89.099,rs7179677,0.064  
15,89.113,rs11854289,0.086  
15,89.225,rs2871011,0.080  
15,89.271,rs2046071,0.081  
15,89.276,rs1256439,0.082  
15,89.288,rs7170046,0.085  
15,89.308,rs12591031,0.095  
15,89.354,rs17158916,0.122  
15,89.359,rs1491579,0.127  
15,89.370,rs2642820,0.136  
15,89.371,rs2201101,0.137  
15,89.385,rs2562769,0.140  
15,89.386,rs17158821,0.140  
15,89.391,rs2562767,0.141  
15,89.706,rs4483821,0.120  
15,90.142,rs2292188,0.112  
15,91.002,rs2020365,0.117  
15,91.438,rs10438428,0.112  
15,91.490,rs1429444,0.105  
15,91.526,rs11073778,0.096  
15,91.545,rs8037320,0.088  
15,91.559,rs1545470,0.087  
15,91.600,rs2305367,0.084  
15,91.603,rs2242047,0.086  
15,91.644,rs4980358,0.107  
15,91.652,rs11073854,0.092  
15,91.703,rs12904615,0.103  
15,91.894,rs8035516,0.095  
15,91.920,rs2342132,0.094  
15,92.457,rs4842888,0.060  
15,92.703,rs338525,0.046  
15,92.809,rs2614674,0.039  
15,92.850,rs4843114,0.035  
15,92.851,rs2344848,0.035  
15,92.879,rs7180790,0.048  
15,92.884,rs4843118,0.050  
15,92.929,rs4505260,0.039  
15,93.117,rs2028731,0.010

15,93.188,rs1444293,0.007  
15,93.490,rs1496882,0.003  
15,93.492,rs11073625,0.003  
15,93.519,rs11632388,0.003  
15,93.840,rs1807445,0.001  
15,93.930,rs4313781,0.001  
15,94.161,rs16977781,0.002  
15,94.298,rs2346734,0.006  
15,94.446,rs16977913,0.005  
15,94.449,rs4608306,0.002  
15,94.542,rs1377095,0.003  
15,94.595,rs7175208,0.005  
15,94.618,rs12901259,0.006  
15,94.638,rs16977961,0.008  
15,94.657,rs12438353,0.008  
15,94.694,rs1545500,0.011  
15,94.711,rs6496365,0.013  
15,94.725,rs16978003,0.014  
15,94.791,rs4887512,0.022  
15,94.803,rs1452459,0.024  
15,94.814,rs8029467,0.025  
15,94.856,rs16978053,0.027  
15,94.862,rs9646225,0.027  
15,94.905,rs12324429,0.029  
15,94.929,rs3743039,0.030  
15,95.019,rs1433448,0.032  
15,95.259,rs10152618,0.041  
15,95.326,rs11073695,0.049  
15,95.405,rs3913351,0.044  
15,95.568,rs8031996,0.041  
15,95.592,rs13379679,0.042  
15,95.595,rs16940235,0.042  
15,95.677,rs17656890,0.048  
15,95.698,rs2606169,0.050  
15,95.721,rs6496420,0.051  
15,95.745,rs2584162,0.031  
15,95.932,rs4344707,0.086  
15,96.020,rs7173810,0.100  
15,96.121,rs8030747,0.119  
15,96.134,rs1435395,0.121  
15,96.177,rs6496448,0.129  
15,96.340,rs1461213,0.160  
15,96.377,rs8030107,0.156  
15,96.591,rs12910780,0.159  
15,96.642,rs8033396,0.159  
15,96.660,rs4887212,0.159  
15,96.724,rs744993,0.164  
15,96.746,rs11635754,0.160  
15,96.747,rs16941593,0.155  
15,96.755,rs12102144,0.136  
15,96.757,rs12899101,0.156  
15,96.796,rs1561806,0.141  
15,96.800,rs10852095,0.140  
15,96.811,rs11858902,0.140  
15,96.853,rs1372598,0.130  
15,96.855,rs2349981,0.131  
15,96.889,rs1442291,0.128  
15,97.038,rs11634144,0.122  
15,97.085,rs17196732,0.122  
15,97.185,rs10852106,0.121  
15,97.222,rs4932367,0.122

15,97.248,rs8025352,0.126  
15,97.252,rs10852109,0.126  
15,97.376,rs6496520,0.127  
15,97.483,rs7173652,0.139  
15,97.526,rs7178611,0.139  
15,97.531,rs8029334,0.139  
15,97.613,rs11073810,0.132  
15,97.725,rs11633371,0.119  
15,97.800,rs1015081,0.101  
15,97.843,rs4932438,0.113  
15,97.857,rs1042630,0.094  
15,97.875,rs8024016,0.093  
15,97.954,rs4932444,0.089  
15,97.993,rs3825992,0.083  
15,98.009,rs3784751,0.080  
15,98.070,rs8039998,0.063  
15,98.282,rs8034934,0.056  
15,98.397,rs293342,0.039  
15,98.619,rs8028123,0.048  
15,98.651,rs2283437,0.047  
15,98.676,rs2238312,0.047  
15,98.979,rs2247233,0.053  
15,99.135,rs150304,0.056  
15,99.205,rs7359232,0.072  
15,99.278,rs2075833,0.072  
15,99.372,rs1439616,0.070  
15,99.391,rs968136,0.054  
15,99.511,rs10775247,0.050  
15,99.974,rs12909844,0.064  
15,100.037,rs2305443,0.064  
15,100.056,rs10152918,0.058  
15,100.058,rs8041622,0.057  
15,100.145,rs11639336,0.077  
15,100.431,rs3853638,0.094  
15,100.584,rs1702161,0.115  
15,100.861,rs1256841,0.141  
15,100.936,rs11852297,0.134  
15,100.995,rs1317722,0.150  
15,101.229,rs11630814,0.145  
15,101.401,rs8024587,0.165  
15,101.475,rs11853144,0.168  
15,101.732,rs1543116,0.174  
15,102.427,rs2589939,0.173  
15,103.314,rs1104880,0.138  
15,103.681,rs8030486,0.150  
15,104.067,rs7175811,0.181  
15,104.150,rs389480,0.216  
15,104.278,rs7402445,0.197  
15,104.415,rs17514846,0.230  
15,105.047,rs4101133,0.259  
15,105.057,rs1972927,0.260  
15,105.102,rs17515520,0.293  
15,105.119,rs1005060,0.298  
15,105.204,rs12441109,0.312  
15,105.422,rs8034560,0.283  
15,105.571,rs2040578,0.227  
15,105.621,rs12905479,0.220  
15,106.053,rs8032397,0.209  
15,106.287,rs7178775,0.247  
15,106.396,rs10520694,0.276  
15,106.443,rs9972541,0.290

15,106.478,rs7173692,0.288  
15,106.481,rs4586406,0.288  
15,106.720,rs4489981,0.240  
15,106.835,rs11074004,0.255  
15,106.860,rs8043364,0.265  
15,106.896,rs4522399,0.287  
15,107.025,rs4932543,0.336  
15,107.090,rs7170769,0.321  
15,107.172,rs6496827,0.316  
15,107.176,rs4932552,0.288  
15,107.350,rs6496836,0.349  
15,107.377,rs4632107,0.359  
15,107.457,rs12915467,0.382  
15,107.518,rs7166187,0.395  
15,107.686,rs7178204,0.463  
15,107.845,rs4267286,0.535  
15,108.112,rs4572364,0.641  
15,108.121,rs8030496,0.649  
15,108.141,rs4290453,0.670  
15,108.218,rs975721,0.799  
15,108.472,rs4932596,0.843  
15,108.665,rs1400784,0.856  
15,108.849,rs4984341,0.873  
15,108.917,rs10520702,0.881  
15,109.504,rs207975,1.095  
15,109.702,rs2238360,1.171  
15,109.760,rs2283461,1.146  
15,109.866,rs3815318,1.089  
15,110.144,rs768882,1.215  
15,110.906,rs1479520,1.156  
15,110.930,rs8032711,1.099  
15,110.931,rs8027648,1.096  
15,110.978,rs7170129,0.978  
15,110.988,rs8037921,0.913  
15,110.992,rs4564522,0.948  
15,110.996,rs2101436,0.988  
15,110.999,rs2200674,0.995  
15,111.031,rs3931230,1.060  
15,111.058,rs1455775,1.022  
15,111.081,rs8034095,0.888  
15,111.090,rs8033207,0.857  
15,111.094,rs4238484,0.848  
15,111.095,rs7162155,0.848  
15,111.103,rs8040515,0.828  
15,111.116,rs12904825,0.838  
15,111.125,rs285705,0.833  
15,111.151,rs432364,0.824  
15,111.251,rs8038332,0.814  
15,111.264,rs7173581,0.820  
15,111.755,rs1439618,0.927  
15,111.874,rs961233,0.917  
15,112.118,rs2272461,0.899  
15,112.244,rs8042437,0.885  
15,112.319,rs11637884,0.875  
15,112.330,rs8038855,0.922  
15,112.430,rs7164440,1.051  
15,112.492,rs8030422,1.066  
15,112.577,rs3887013,1.111  
15,112.623,rs11637013,1.092  
15,112.645,rs6497019,1.061  
15,112.796,rs4396487,0.987

15,112.804,rs8025252,0.984  
15,112.836,rs7174083,0.953  
15,112.900,rs8041299,0.899  
15,112.922,rs6497026,0.914  
15,112.973,rs10459680,0.911  
15,113.022,rs733036,0.903  
15,113.109,rs8037591,0.917  
15,113.116,rs17649643,0.917  
15,113.154,rs16947539,0.916  
15,113.424,rs1872052,0.883  
15,113.465,rs723033,0.862  
15,113.561,rs9888659,0.830  
15,113.612,rs11633878,0.816  
15,113.699,rs9302365,0.855  
15,113.771,rs11857333,0.852  
15,113.826,rs8039301,0.843  
15,113.847,rs7170984,0.837  
15,113.891,rs11074155,0.821  
15,114.075,rs2128764,0.763  
15,114.123,rs8028266,0.741  
15,114.131,rs16947804,0.739  
15,114.134,rs7166968,0.738  
15,114.162,rs1384739,0.687  
15,114.163,rs1384740,0.687  
15,114.335,rs17541566,0.779  
15,114.384,rs936675,0.748  
15,114.411,rs1351721,0.750  
15,114.415,rs10520724,0.750  
15,114.457,rs11853122,0.796  
15,114.523,rs2892474,0.784  
15,114.683,rs6497069,0.842  
15,114.711,rs12904317,0.848  
15,114.785,rs1489129,0.847  
15,115.029,rs16948067,0.802  
15,115.078,rs1473491,0.802  
15,115.331,rs17615276,0.776  
15,115.478,rs4777688,0.808  
15,115.481,rs16948292,0.809  
15,115.493,rs4584771,0.808  
15,115.542,rs7170017,0.812  
15,115.566,rs4354877,0.813  
15,115.582,rs7180119,0.756  
15,115.647,rs17626899,0.757  
15,115.694,rs7182315,0.725  
15,115.841,rs11853634,0.779  
15,116.093,rs6497144,0.739  
15,116.269,rs4335731,0.674  
15,116.419,rs12914286,0.675  
15,116.571,rs12898390,0.650  
15,116.599,rs13329526,0.651  
15,116.663,rs7164887,0.650  
15,116.704,rs1031912,0.687  
15,116.728,rs1564391,0.707  
15,116.773,rs6497165,0.753  
15,116.797,rs6497167,0.766  
15,116.831,rs17628639,0.770  
15,116.840,rs8033102,0.751  
15,116.864,rs1479833,0.714  
15,116.930,rs1479836,0.709  
15,116.939,rs2219854,0.705  
15,117.001,rs2605119,0.669

15,117.026,rs7178035,0.692  
15,117.051,rs7164241,0.704  
15,117.087,rs1598490,0.706  
15,117.107,rs17711817,0.707  
15,117.109,rs2892541,0.707  
15,117.174,rs7172568,0.718  
15,117.258,rs1378591,0.758  
15,117.298,rs1563363,0.725  
15,117.301,rs12904449,0.724  
15,117.334,rs4984343,0.727  
15,117.344,rs8035826,0.731  
15,117.383,rs294547,0.689  
15,117.407,rs294558,0.611  
15,117.438,rs8024303,0.607  
15,117.462,rs10520748,0.602  
15,117.556,rs12909356,0.593  
15,117.575,rs8025603,0.592  
15,117.584,rs16974359,0.599  
15,117.635,rs2117214,0.633  
15,117.681,rs10520754,0.562  
15,117.888,rs8041166,0.467  
15,117.940,rs7173161,0.445  
15,117.989,rs11633702,0.423  
15,118.091,rs16949208,0.399  
15,118.102,rs2161936,0.398  
15,118.171,rs2291995,0.386  
15,118.327,rs2619171,0.348  
15,118.354,rs2619170,0.355  
15,118.365,rs1564326,0.354  
15,118.421,rs4381545,0.323  
15,118.443,rs7162031,0.314  
15,118.500,rs4984406,0.306  
15,118.536,rs9920469,0.309  
15,118.606,rs2219816,0.312  
15,118.622,rs8037584,0.310  
15,118.678,rs11073390,0.304  
15,118.913,rs4984590,0.287  
15,119.149,rs17635194,0.277  
15,119.223,rs9920854,0.258  
15,119.235,rs7172063,0.258  
15,119.265,rs12903810,0.256  
15,119.320,rs1563652,0.237  
15,119.346,rs8031253,0.233  
15,119.543,rs1471169,0.200  
15,119.560,rs12148851,0.200  
15,119.696,rs188324,0.196  
15,120.123,rs7176538,0.215  
15,120.163,rs17667193,0.205  
15,120.266,rs10520775,0.180  
15,120.431,rs7174577,0.138  
15,120.543,rs16975040,0.138  
15,120.776,rs11858528,0.215  
15,120.835,rs1834207,0.221  
15,120.882,rs4984577,0.241  
15,120.990,rs6496105,0.279  
15,121.063,rs2052652,0.312  
15,121.183,rs10520786,0.359  
15,121.336,rs9920471,0.405  
15,121.459,rs8036454,0.414  
15,121.476,rs1968284,0.384  
15,121.643,rs8029103,0.479

15,121.652,rs2397811,0.484  
15,121.704,rs8035878,0.518  
15,121.877,rs16975468,0.613  
15,121.880,rs11852498,0.614  
15,121.936,rs1372641,0.619  
15,122.071,rs11073446,0.645  
15,122.732,rs744738,0.672  
15,122.866,rs1369943,0.678  
15,123.037,rs955643,0.674  
15,123.088,rs7162291,0.656  
15,123.130,rs17517092,0.696  
15,123.187,rs7168486,0.676  
15,123.194,rs10520802,0.674  
15,123.214,rs16975846,0.675  
15,123.285,rs1450490,0.674  
15,123.447,rs17591838,0.586  
15,123.597,rs2044800,0.587  
15,123.610,rs6496147,0.574  
15,123.665,rs7170551,0.517  
15,123.680,rs8029545,0.492  
15,123.730,rs4374122,0.429  
15,123.769,rs7182127,0.417  
15,123.844,rs7178874,0.403  
15,123.903,rs12907607,0.419  
15,123.956,rs1007328,0.418  
15,124.010,rs8030759,0.404  
15,124.030,rs11073466,0.398  
15,124.031,rs2278510,0.398  
15,124.245,rs2589252,0.427  
15,124.251,rs2577002,0.428  
15,124.288,rs4984530,0.362  
15,124.326,rs7180721,0.361  
15,124.369,rs8033891,0.354  
15,124.527,rs3743462,0.377  
15,124.634,rs745136,0.441  
15,124.673,rs8031676,0.413  
15,124.739,rs1437753,0.384  
15,124.752,rs1837119,0.379  
15,124.814,rs1437768,0.375  
15,125.067,rs934782,0.371  
15,125.190,rs1370555,0.388  
15,125.239,rs6496172,0.393  
15,125.244,rs2398227,0.394  
15,125.300,rs7163206,0.403  
15,125.320,rs12148530,0.370  
15,125.343,rs12916220,0.370  
15,125.588,rs8038026,0.357  
15,125.750,rs4335743,0.371  
15,126.003,rs4436745,0.329  
15,126.073,rs2715792,0.313  
15,126.147,rs2895446,0.312  
15,126.212,rs4965136,0.313  
15,126.219,rs1503340,0.315  
15,126.379,rs7179800,0.339  
15,126.388,rs1011474,0.343  
15,126.439,rs8035569,0.323  
15,126.466,rs8023650,0.367  
15,127.432,rs8042425,0.344  
15,127.534,rs9672547,0.327  
15,127.552,rs4965146,0.333  
15,127.613,rs11634085,0.390

15,127.635,rs8026791,0.412  
15,127.701,rs234530,0.531  
15,127.748,rs1558389,0.558  
15,127.785,rs9806494,0.565  
15,127.878,rs1996155,0.585  
15,127.927,rs1355844,0.591  
15,128.006,rs1996142,0.581  
15,128.087,rs11854411,0.570  
15,128.165,rs12594335,0.527  
15,128.194,rs11857367,0.538  
15,128.202,rs7169879,0.540  
15,128.219,rs7181914,0.547  
15,128.473,rs4965177,0.656  
15,128.578,rs12441901,0.650  
15,128.612,rs4128671,0.647  
15,128.706,rs11638539,0.612  
15,128.752,rs6496231,0.560  
15,128.773,rs12900806,0.546  
15,128.788,rs4523904,0.551  
15,128.800,rs2088783,0.566  
15,128.851,rs11637962,0.677  
15,129.013,rs649034,0.466  
15,129.060,rs8039196,0.450  
15,129.139,rs586637,0.446  
15,129.233,rs7166685,0.423  
15,129.380,rs11073574,0.407  
15,129.537,rs12905875,0.396  
15,129.592,rs1602457,0.388  
15,129.646,rs7497359,0.380  
15,129.657,rs8035976,0.388  
15,129.713,rs4519318,0.443  
15,129.806,rs4965117,0.436  
15,129.825,rs12441858,0.444  
15,129.856,rs2130882,0.464  
15,130.016,rs7172170,0.434  
15,130.202,rs2054520,0.418  
15,130.229,rs11634680,0.416  
15,130.232,rs1383146,0.411  
15,130.290,rs7182895,0.430  
15,130.318,rs1480090,0.438  
15,130.356,rs1552047,0.452  
15,130.432,rs2311311,0.475  
15,130.524,rs1372839,0.433  
15,130.567,rs7183808,0.419  
15,130.582,rs718674,0.405  
15,130.588,rs1023781,0.406  
15,130.631,rs1542112,0.456  
15,130.646,rs7177705,0.469  
15,130.667,rs2120026,0.487  
15,130.706,rs3889766,0.448  
15,130.735,rs1442810,0.452  
15,130.815,rs9920714,0.400  
15,130.900,rs7183516,0.420  
15,131.100,rs1863273,0.429  
15,131.158,rs933812,0.481  
15,131.206,rs2311754,0.523  
15,131.214,rs7497612,0.532  
15,131.226,rs1319873,0.539  
15,131.282,rs4527002,0.541  
15,131.357,rs7179187,0.584  
15,131.436,rs4966009,0.609



15,131.457,rs1319869,0.617  
15,131.574,rs11857366,0.620  
15,131.805,rs2684761,0.498  
15,131.842,rs2670506,0.487  
15,131.883,rs1879612,0.476  
15,131.981,rs1464433,0.462  
15,132.008,rs2715417,0.458  
15,132.019,rs7169544,0.456  
15,132.020,rs3784604,0.456  
15,132.034,rs2684807,0.457  
15,132.092,rs7166565,0.437  
15,132.112,rs9672965,0.451  
15,132.298,rs2654987,0.422  
15,132.336,rs2593028,0.451  
15,132.359,rs28504,0.464  
15,132.375,rs1703794,0.497  
15,132.389,rs7165207,0.554  
15,132.412,rs4965210,0.595  
15,132.413,rs4965212,0.595  
15,132.511,rs2292288,0.617  
15,132.727,rs12901518,0.604  
15,133.002,rs8036160,0.597  
15,133.089,rs1472986,0.564  
15,133.107,rs4965476,0.551  
15,133.156,rs4965485,0.519  
15,133.344,rs2119946,0.603  
15,133.373,rs7175248,0.601  
15,133.654,rs11247118,0.489  
15,133.891,rs7175181,0.457  
15,133.966,rs2958959,0.447  
15,134.104,rs8039888,0.484  
15,134.177,rs2573632,0.501  
15,134.239,rs2581332,0.523  
15,134.314,rs1836698,0.484  
15,134.405,rs745104,0.439  
15,134.424,rs2573624,0.429  
15,134.523,rs2573660,0.468  
15,134.560,rs2727120,0.469  
15,134.624,rs1871741,0.462  
15,134.637,rs4965572,0.469  
15,134.733,rs7498060,0.539  
15,134.762,rs2199932,0.558  
15,134.833,rs8035111,0.564  
15,134.845,rs7183000,0.563  
15,134.856,rs7164647,0.552  
15,134.866,rs8037201,0.511  
15,134.868,rs9806684,0.511  
15,134.905,rs12719733,0.536  
15,134.939,rs11247165,0.492  
15,134.970,rs4419043,0.564  
15,134.972,rs6598310,0.563  
15,135.029,rs11247169,0.497  
15,135.041,rs12592822,0.496  
15,135.106,rs4965614,0.462  
15,135.149,rs4965303,0.447  
15,135.222,rs11638887,0.471  
15,135.246,rs4965637,0.479  
15,135.368,rs7181754,0.449  
15,135.718,rs8041714,0.458  
15,135.725,rs4580136,0.458  
15,135.801,rs7166031,0.446

15,135.804,rs12460,0.445  
15,135.874,rs7177883,0.439  
15,135.917,rs4965685,0.437  
15,135.980,rs7168512,0.409  
15,136.008,rs4965327,0.387  
15,136.032,rs9806219,0.368  
15,136.057,rs7166489,0.368  
15,136.079,rs1689954,0.363  
15,136.120,rs1661812,0.347  
15,136.130,rs304110,0.341  
15,136.192,rs8043261,0.353  
15,136.214,rs7169514,0.375  
15,136.255,rs1465936,0.418  
15,136.322,rs10902583,0.449  
15,136.445,rs3803438,0.479  
15,136.453,rs4965732,0.480  
15,136.571,rs4646680,0.481  
15,136.585,rs3803428,0.483  
15,136.617,rs7181644,0.483  
15,136.732,rs8038607,0.491  
15,136.733,rs12915954,0.492  
15,136.807,rs1993375,0.494  
15,136.925,rs17744500,0.547  
15,137.021,rs12903939,0.529  
15,137.024,rs11630047,0.543  
15,137.039,rs11635137,0.609  
15,137.056,rs2305569,0.574  
15,137.086,rs2412132,0.574  
15,137.130,rs2045161,0.593  
15,137.152,rs1809180,0.659  
15,137.172,rs1807833,0.687  
15,137.181,rs2168188,0.690  
15,137.224,rs13329644,0.712  
15,137.234,rs2012387,0.713  
15,137.310,rs12148369,0.705  
15,137.404,rs2101171,0.695  
15,137.476,rs12102173,0.705  
15,137.560,rs2086678,0.717  
15,137.587,rs2949,0.732  
15,137.659,rs3825915,0.810  
15,137.661,rs3784491,0.806  
15,137.671,rs1135911,0.750  
15,137.673,rs10152164,0.745  
15,137.684,rs6598465,0.740  
15,137.689,rs4965381,0.751  
15,137.706,rs1874274,0.783  
15,137.718,rs3784463,0.804  
15,137.727,rs3825901,0.775  
15,137.763,rs7168655,0.778  
15,137.764,rs7169026,0.779  
15,137.776,rs3825896,0.787  
15,137.793,rs11638957,0.811  
15,137.865,rs4965877,0.860  
15,137.891,rs7165891,0.881  
15,137.895,rs8043067,0.882  
15,137.948,rs7166024,0.951  
15,137.986,rs7172127,0.939  
15,137.996,rs2084148,0.947  
15,138.012,rs11636460,1.002  
15,138.028,rs1011160,0.993  
15,138.059,rs1562253,0.960

15,138.065,rs8039456,0.956  
15,138.086,rs1446120,0.948  
15,138.121,rs12902757,0.938  
15,138.680,rs7182651,0.921  
15,138.755,rs7180508,0.908  
16,1.140,rs216590,-0.052  
16,1.178,rs2857998,-0.050  
16,1.199,rs2562185,-0.064  
16,1.360,rs3918352,-0.091  
16,1.499,rs6600191,-0.091  
16,1.693,rs7359414,-0.096  
16,2.096,rs3852766,-0.113  
16,2.358,rs7206751,-0.109  
16,2.419,rs4984890,-0.116  
16,2.702,rs3752496,-0.183  
16,2.765,rs6597,-0.199  
16,2.965,rs12102635,-0.188  
16,2.992,rs3764246,-0.183  
16,3.101,rs2294451,-0.151  
16,3.151,rs11864684,-0.141  
16,3.190,rs2076237,-0.139  
16,3.260,rs4984946,-0.137  
16,3.395,rs760560,-0.169  
16,3.527,rs402605,-0.167  
16,3.649,rs2072042,-0.162  
16,3.687,rs554929,-0.207  
16,3.757,rs372196,-0.197  
16,3.850,rs4989483,-0.183  
16,3.851,rs4989489,-0.182  
16,3.874,rs11644051,-0.164  
16,3.911,rs550713,-0.169  
16,3.993,rs533184,-0.166  
16,4.198,rs11640796,-0.193  
16,4.559,rs4984803,-0.202  
16,4.706,rs2294605,-0.227  
16,4.992,rs742408,-0.282  
16,5.006,rs12934261,-0.288  
16,5.088,rs13336428,-0.295  
16,5.115,rs2745106,-0.353  
16,5.210,rs2235639,-0.322  
16,5.806,rs12920634,-0.421  
16,6.117,rs12325282,-0.448  
16,6.408,rs9928312,-0.458  
16,6.589,rs2286469,-0.364  
16,6.636,rs12596630,-0.348  
16,6.661,rs8051338,-0.342  
16,6.702,rs11876,-0.336  
16,6.782,rs7190284,-0.323  
16,7.014,rs35785,-0.309  
16,7.155,rs26828,-0.300  
16,7.332,rs155243,-0.255  
16,7.486,rs323073,-0.283  
16,7.569,rs17135889,-0.327  
16,7.662,rs4238908,-0.328  
16,8.342,rs11645410,-0.271  
16,8.356,rs11642384,-0.282  
16,8.378,rs3094471,-0.298  
16,8.510,rs2240140,-0.289  
16,8.679,rs8054377,-0.360  
16,8.685,rs3810801,-0.326  
16,8.818,rs9673618,-0.281

16,8.857,rs9935192,-0.283  
16,8.922,rs734138,-0.261  
16,9.144,rs10431961,-0.294  
16,9.227,rs12919933,-0.260  
16,9.440,rs172787,-0.162  
16,9.479,rs8044035,-0.174  
16,9.502,rs8047557,-0.160  
16,9.590,rs224218,-0.145  
16,9.746,rs11645952,-0.123  
16,9.758,rs6501170,-0.129  
16,9.830,rs7196196,-0.173  
16,9.833,rs129988,-0.179  
16,9.854,rs2191416,-0.219  
16,9.910,rs129968,-0.217  
16,9.966,rs11076786,-0.209  
16,10.021,rs3025697,-0.204  
16,10.248,rs2239316,-0.176  
16,10.382,rs12446940,-0.152  
16,10.463,rs17256169,-0.133  
16,10.470,rs7197403,-0.132  
16,10.474,rs2601773,-0.132  
16,10.513,rs2238439,-0.151  
16,10.515,rs2230739,-0.169  
16,10.524,rs11649287,-0.162  
16,10.539,rs11647828,-0.169  
16,10.616,rs7204987,-0.153  
16,10.645,rs7193552,-0.156  
16,10.694,rs2531999,-0.159  
16,10.724,rs4786461,-0.160  
16,10.729,rs81647,-0.162  
16,10.734,rs233178,-0.164  
16,10.787,rs8051399,-0.203  
16,10.798,rs12324980,-0.210  
16,10.803,rs6500586,-0.213  
16,10.803,rs11076825,-0.213  
16,10.822,rs8046435,-0.233  
16,10.832,rs1291717,-0.245  
16,10.840,rs2386885,-0.247  
16,10.908,rs251742,-0.225  
16,10.967,rs17136962,-0.212  
16,11.120,rs1291695,-0.206  
16,11.238,rs11645060,-0.197  
16,11.241,rs17137037,-0.197  
16,11.525,rs6500619,-0.209  
16,11.738,rs1684618,-0.198  
16,12.033,rs9931084,-0.151  
16,12.065,rs1876359,-0.144  
16,12.139,rs4038782,-0.146  
16,12.196,rs2908654,-0.149  
16,12.247,rs7191632,-0.178  
16,12.257,rs2908646,-0.208  
16,12.328,rs2270256,-0.228  
16,12.338,rs7110,-0.201  
16,12.405,rs2270834,-0.216  
16,12.405,rs9925239,-0.216  
16,12.430,rs8047337,-0.232  
16,12.563,rs12447373,-0.321  
16,12.656,rs4786640,-0.368  
16,12.661,rs12927295,-0.339  
16,12.735,rs4786015,-0.360  
16,12.926,rs938760,-0.501

16,13.054,rs490662,-0.579  
16,13.190,rs4238859,-0.634  
16,13.246,rs12932771,-0.711  
16,13.259,rs8058856,-0.716  
16,13.283,rs4592658,-0.693  
16,13.340,rs11640110,-0.642  
16,13.365,rs6500699,-0.649  
16,13.414,rs7187482,-0.634  
16,13.455,rs1011489,-0.645  
16,13.659,rs972843,-0.694  
16,13.660,rs12597267,-0.694  
16,13.674,rs9934123,-0.702  
16,13.734,rs7199938,-0.648  
16,13.803,rs1865815,-0.586  
16,13.836,rs4786780,-0.611  
16,13.879,rs7186318,-0.613  
16,13.914,rs1529917,-0.627  
16,13.921,rs7201619,-0.583  
16,13.952,rs8050728,-0.583  
16,14.031,rs1821694,-0.594  
16,14.107,rs4786069,-0.533  
16,14.176,rs12446152,-0.426  
16,14.205,rs13330260,-0.379  
16,14.300,rs8050038,-0.367  
16,14.375,rs2880608,-0.373  
16,14.435,rs2109029,-0.332  
16,14.449,rs8057452,-0.333  
16,14.506,rs13335835,-0.326  
16,14.557,rs2014475,-0.340  
16,14.598,rs2343582,-0.392  
16,14.643,rs17139127,-0.414  
16,14.763,rs2035591,-0.433  
16,14.789,rs17139207,-0.436  
16,14.963,rs1035564,-0.432  
16,15.001,rs4146812,-0.432  
16,15.002,rs9937132,-0.432  
16,15.006,rs13337849,-0.434  
16,15.136,rs889701,-0.470  
16,15.223,rs1424121,-0.480  
16,15.240,rs12934851,-0.482  
16,15.464,rs6500760,-0.518  
16,15.703,rs17139483,-0.540  
16,15.799,rs8046027,-0.543  
16,15.865,rs7189603,-0.527  
16,16.082,rs11077014,-0.442  
16,16.110,rs1362315,-0.425  
16,16.201,rs17817199,-0.367  
16,16.413,rs1861188,-0.378  
16,16.569,rs12102452,-0.365  
16,16.672,rs12598169,-0.319  
16,16.755,rs2191420,-0.340  
16,16.874,rs8048522,-0.320  
16,16.898,rs9931078,-0.253  
16,16.907,rs2109457,-0.246  
16,17.088,rs9652638,-0.262  
16,17.191,rs4337300,-0.269  
16,17.297,rs813913,-0.294  
16,17.304,rs2159549,-0.296  
16,17.370,rs9931202,-0.318  
16,17.418,rs1476977,-0.290  
16,17.524,rs1833172,-0.310

16,17.639,rs11640341,-0.314  
16,17.791,rs10492841,-0.266  
16,17.839,rs2110342,-0.208  
16,17.857,rs7201323,-0.255  
16,17.857,rs7196961,-0.256  
16,17.858,rs12932732,-0.257  
16,17.861,rs12935093,-0.262  
16,17.881,rs11645845,-0.285  
16,17.889,rs8047060,-0.287  
16,17.907,rs12934762,-0.293  
16,17.907,rs9923210,-0.294  
16,17.927,rs7200839,-0.291  
16,17.933,rs6500842,-0.298  
16,17.954,rs6500848,-0.314  
16,17.986,rs2172308,-0.315  
16,18.000,rs6500870,-0.319  
16,18.041,rs12103087,-0.301  
16,18.065,rs12923619,-0.295  
16,18.121,rs11864504,-0.272  
16,18.139,rs12925428,-0.237  
16,18.163,rs11643737,-0.234  
16,18.246,rs12709169,-0.232  
16,18.308,rs11866781,-0.229  
16,18.332,rs1382478,-0.231  
16,18.374,rs8046633,-0.240  
16,18.423,rs17559799,-0.230  
16,18.469,rs12447219,-0.231  
16,18.475,rs2127065,-0.232  
16,18.510,rs12599645,-0.235  
16,18.561,rs10500350,-0.236  
16,18.963,rs11639540,-0.243  
16,19.197,rs8050740,-0.251  
16,19.306,rs17563428,-0.276  
16,19.420,rs11647224,-0.302  
16,19.453,rs12920363,-0.303  
16,19.615,rs2048093,-0.318  
16,19.701,rs7196597,-0.336  
16,19.749,rs1507031,-0.344  
16,19.830,rs17144160,-0.333  
16,19.863,rs6500988,-0.327  
16,20.033,rs3785229,-0.315  
16,20.106,rs7198717,-0.313  
16,20.148,rs6501005,-0.287  
16,20.171,rs3785222,-0.294  
16,20.205,rs740676,-0.304  
16,20.224,rs3785215,-0.302  
16,20.299,rs2058186,-0.296  
16,20.325,rs8061577,-0.301  
16,20.392,rs8056138,-0.274  
16,20.406,rs881562,-0.275  
16,20.470,rs984606,-0.298  
16,20.493,rs1014124,-0.302  
16,20.630,rs12447438,-0.323  
16,20.878,rs11077231,-0.333  
16,21.047,rs4608356,-0.335  
16,21.229,rs8044765,-0.373  
16,21.250,rs4464062,-0.376  
16,21.338,rs8054510,-0.337  
16,21.595,rs4787108,-0.340  
16,21.752,rs7193708,-0.437  
16,21.772,rs3112655,-0.449

16,21.782,rs6501060,-0.450  
16,22.220,rs9923791,-0.433  
16,22.347,rs1451595,-0.431  
16,22.405,rs12596707,-0.425  
16,22.669,rs4346186,-0.425  
16,22.701,rs8057314,-0.373  
16,22.750,rs1868970,-0.364  
16,22.785,rs17145648,-0.379  
16,22.822,rs1015990,-0.375  
16,22.862,rs8053368,-0.361  
16,23.112,rs7500432,-0.390  
16,23.148,rs9934899,-0.332  
16,23.149,rs4488430,-0.332  
16,23.168,rs764681,-0.324  
16,23.185,rs2361075,-0.321  
16,23.234,rs8063560,-0.304  
16,23.247,rs9933436,-0.299  
16,23.254,rs12929740,-0.298  
16,23.280,rs11860880,-0.295  
16,23.340,rs4354918,-0.311  
16,23.387,rs7187729,-0.342  
16,23.496,rs2312949,-0.346  
16,23.588,rs4985110,-0.336  
16,23.610,rs12921061,-0.299  
16,23.617,rs11646372,-0.297  
16,23.667,rs2313427,-0.287  
16,23.681,rs1731083,-0.285  
16,23.697,rs1641003,-0.283  
16,23.705,rs1731017,-0.316  
16,23.745,rs9937726,-0.299  
16,23.751,rs12930556,-0.297  
16,23.791,rs3785176,-0.278  
16,23.809,rs8057024,-0.266  
16,24.049,rs12923049,-0.306  
16,24.083,rs4438302,-0.285  
16,24.109,rs899258,-0.321  
16,24.126,rs12598117,-0.342  
16,24.159,rs7184991,-0.371  
16,24.251,rs7186634,-0.395  
16,24.274,rs9926522,-0.388  
16,24.368,rs2965831,-0.364  
16,24.379,rs4781512,-0.362  
16,24.379,rs2941333,-0.362  
16,24.496,rs4780910,-0.314  
16,24.549,rs631208,-0.313  
16,24.570,rs837346,-0.316  
16,24.657,rs837356,-0.314  
16,24.661,rs12598159,-0.314  
16,24.701,rs9928435,-0.328  
16,24.726,rs249276,-0.333  
16,24.770,rs1428798,-0.349  
16,24.849,rs10492846,-0.300  
16,24.908,rs1074042,-0.284  
16,24.910,rs9921476,-0.284  
16,24.911,rs2080273,-0.283  
16,24.938,rs722008,-0.282  
16,24.943,rs12445475,-0.281  
16,24.950,rs11074352,-0.282  
16,24.961,rs316374,-0.283  
16,24.967,rs16966016,-0.284  
16,24.971,rs7186415,-0.314

16,24.983,rs11866237,-0.298  
16,24.996,rs1972578,-0.282  
16,24.998,rs8055473,-0.282  
16,25.003,rs11639516,-0.256  
16,25.103,rs1548808,-0.269  
16,25.162,rs884918,-0.289  
16,25.168,rs6497599,-0.291  
16,25.464,rs1078695,-0.373  
16,25.508,rs1448254,-0.374  
16,25.836,rs1070502,-0.387  
16,26.122,rs9938544,-0.403  
16,26.273,rs7201055,-0.402  
16,26.316,rs13332694,-0.386  
16,26.426,rs1065832,-0.304  
16,26.501,rs194332,-0.360  
16,26.521,rs12449282,-0.373  
16,26.757,rs1234923,-0.389  
16,26.931,rs10153114,-0.421  
16,27.040,rs11859719,-0.439  
16,27.049,rs12443943,-0.439  
16,27.588,rs1970817,-0.410  
16,27.616,rs12597384,-0.405  
16,27.616,rs16957347,-0.405  
16,27.690,rs3790126,-0.411  
16,27.704,rs6498070,-0.403  
16,27.735,rs8047864,-0.357  
16,27.741,rs1104833,-0.341  
16,27.773,rs7190235,-0.260  
16,27.829,rs1111493,-0.224  
16,27.851,rs4780959,-0.216  
16,27.918,rs6498098,-0.207  
16,28.017,rs2719726,-0.201  
16,28.091,rs4780986,-0.189  
16,28.126,rs2541467,-0.167  
16,28.167,rs1641788,-0.138  
16,28.172,rs8055253,-0.135  
16,28.188,rs9939578,-0.124  
16,28.197,rs9937956,-0.110  
16,28.200,rs8048199,-0.104  
16,28.210,rs10431909,-0.093  
16,28.236,rs4781016,-0.071  
16,28.250,rs4072865,-0.090  
16,28.351,rs2041733,-0.086  
16,28.434,rs794433,-0.103  
16,28.460,rs705904,-0.100  
16,28.529,rs243324,-0.103  
16,28.584,rs7206320,-0.102  
16,28.692,rs8056559,-0.087  
16,28.702,rs12448800,-0.082  
16,28.709,rs4076823,-0.067  
16,28.729,rs4781083,-0.059  
16,28.736,rs8061112,-0.049  
16,28.739,rs8047291,-0.047  
16,28.745,rs11074982,-0.059  
16,28.762,rs4781091,-0.058  
16,28.796,rs12929140,-0.056  
16,28.851,rs4781110,-0.053  
16,28.877,rs8052942,-0.056  
16,28.887,rs6498215,-0.057  
16,28.895,rs11646835,-0.052  
16,28.910,rs12918743,-0.031



16,28.915,rs7204801,-0.031  
16,28.948,rs3743582,-0.032  
16,28.989,rs1345442,-0.040  
16,29.019,rs753988,-0.043  
16,29.094,rs9927281,-0.049  
16,29.095,rs2868980,-0.049  
16,29.120,rs1050049,-0.050  
16,29.175,rs1592572,-0.052  
16,29.261,rs10492854,-0.046  
16,29.284,rs8061475,-0.046  
16,29.382,rs154148,-0.043  
16,29.458,rs464017,-0.037  
16,29.510,rs7185307,-0.032  
16,29.581,rs16959252,-0.012  
16,29.603,rs11861545,-0.008  
16,29.659,rs7186239,-0.004  
16,29.755,rs1035579,-0.000  
16,29.842,rs7206244,-0.000  
16,29.954,rs13336229,-0.000  
16,29.964,rs16959796,-0.000  
16,29.965,rs1641831,-0.000  
16,29.972,rs4781243,0.000  
16,30.018,rs1641894,-0.000  
16,30.119,rs10852352,0.000  
16,30.123,rs755685,0.000  
16,30.217,rs17226949,0.000  
16,30.221,rs890883,0.000  
16,30.297,rs1612572,0.000  
16,30.302,rs10468253,0.001  
16,30.316,rs2059819,0.002  
16,30.348,rs8056212,0.002  
16,30.385,rs755214,0.003  
16,30.389,rs1622135,0.003  
16,30.422,rs1627143,0.004  
16,30.576,rs2865625,0.013  
16,30.645,rs16960659,0.018  
16,30.648,rs4513082,0.018  
16,30.724,rs16960741,0.018  
16,30.789,rs7201919,0.016  
16,30.821,rs4238618,0.015  
16,30.909,rs8060233,0.009  
16,31.256,rs2173865,0.000  
16,31.281,rs4780494,0.001  
16,31.330,rs11859818,0.000  
16,31.362,rs276625,0.000  
16,31.492,rs401326,-0.000  
16,31.506,rs4553616,-0.000  
16,31.549,rs1123220,-0.001  
16,31.663,rs153098,0.000  
16,31.764,rs436812,0.001  
16,31.791,rs204034,0.001  
16,31.791,rs16961456,0.001  
16,31.810,rs11647787,0.001  
16,31.852,rs4780514,0.001  
16,31.865,rs8058023,0.001  
16,32.059,rs16961712,0.004  
16,32.220,rs734826,0.007  
16,32.364,rs11642207,0.007  
16,32.567,rs11864841,0.001  
16,32.602,rs1894380,0.001  
16,32.615,rs8056716,0.000

16,32.633,rs1547402,-0.000  
16,32.729,rs12102475,-0.001  
16,32.768,rs7184684,-0.001  
16,33.044,rs179596,-0.000  
16,33.199,rs11861769,-0.002  
16,33.258,rs1034392,-0.005  
16,33.276,rs16962919,-0.006  
16,33.323,rs16962967,-0.006  
16,33.379,rs1029290,-0.006  
16,33.420,rs11865632,-0.003  
16,33.479,rs8054265,-0.000  
16,33.612,rs3136166,-0.001  
16,33.848,rs1794236,-0.001  
16,33.872,rs12599691,-0.003  
16,34.421,rs7194165,-0.002  
16,34.448,rs9889180,-0.001  
16,34.471,rs8051081,-0.001  
16,34.476,rs878340,-0.000  
16,34.521,rs7499658,-0.000  
16,34.561,rs17198566,0.001  
16,34.562,rs12599053,0.002  
16,34.564,rs16963706,0.016  
16,34.564,rs11075236,0.017  
16,34.572,rs1000174,0.023  
16,34.673,rs4782165,0.020  
16,34.873,rs4780754,0.018  
16,35.930,rs222130,0.020  
16,36.166,rs12449163,0.023  
16,36.872,rs13333250,0.033  
16,36.971,rs11649527,0.036  
16,37.061,rs4074171,0.025  
16,37.065,rs8051794,0.025  
16,37.107,rs4496122,0.020  
16,37.202,rs12918362,0.010  
16,37.360,rs6498657,0.001  
16,37.433,rs8061749,0.000  
16,37.683,rs12933150,0.000  
16,37.689,rs4782029,0.000  
16,37.690,rs9940419,0.001  
16,37.770,rs7206558,0.001  
16,37.824,rs7202731,-0.000  
16,37.835,rs17210682,-0.000  
16,37.841,rs7193856,-0.000  
16,37.871,rs722074,0.000  
16,37.953,rs2045498,0.001  
16,37.976,rs7206651,0.001  
16,37.984,rs12598653,0.001  
16,37.987,rs12449229,0.002  
16,38.104,rs6498703,0.006  
16,38.153,rs1465465,0.008  
16,38.160,rs4613050,0.010  
16,38.185,rs7194068,0.018  
16,38.221,rs4255769,0.014  
16,38.276,rs11075365,0.007  
16,38.435,rs12596653,0.005  
16,38.458,rs11075375,0.003  
16,38.472,rs1565774,0.002  
16,38.627,rs4780669,0.015  
16,38.676,rs12051327,0.011  
16,38.853,rs7201086,0.021  
16,38.908,rs2158231,0.024

16,38.953,rs12596708,0.027  
16,39.121,rs173236,0.035  
16,39.129,rs1428097,0.034  
16,39.209,rs8046090,0.007  
16,40.203,rs9934555,0.028  
16,40.208,rs4432257,0.028  
16,40.413,rs4438288,0.032  
16,40.918,rs4536454,0.044  
16,40.991,rs3743955,0.044  
16,41.064,rs9938775,0.038  
16,41.133,rs1017316,0.030  
16,41.235,rs8060055,0.015  
16,41.289,rs16971672,0.003  
16,41.373,rs12929451,0.001  
16,41.405,rs229007,-0.000  
16,41.492,rs12925834,-0.004  
16,41.536,rs2352983,-0.010  
16,41.539,rs916768,-0.015  
16,41.540,rs2269790,-0.015  
16,41.573,rs3785351,-0.012  
16,41.685,rs2269793,-0.007  
16,41.812,rs1023442,-0.000  
16,41.820,rs2097266,-0.000  
16,41.829,rs7194009,0.000  
16,41.834,rs4457974,0.000  
16,41.855,rs727187,-0.000  
16,41.916,rs8049383,0.001  
16,41.918,rs11640726,0.001  
16,41.925,rs12935562,0.001  
16,41.958,rs1858972,0.000  
16,41.966,rs16969473,0.000  
16,42.033,rs2764754,-0.000  
16,42.076,rs12447513,-0.002  
16,42.096,rs9925119,-0.006  
16,42.208,rs8059941,-0.001  
16,42.218,rs7191955,-0.000  
16,42.229,rs9927608,0.000  
16,42.257,rs4476181,0.001  
16,42.259,rs9922144,-0.001  
16,42.315,rs11074450,-0.000  
16,42.402,rs9652589,0.003  
16,42.444,rs11646919,0.006  
16,42.470,rs7187470,0.021  
16,42.507,rs7498385,0.015  
16,43.093,rs2285834,0.005  
16,43.121,rs11074476,0.005  
16,43.202,rs4783513,0.004  
16,43.309,rs172958,0.002  
16,43.495,rs8055894,-0.000  
16,43.534,rs2075521,-0.000  
16,43.555,rs741720,0.001  
16,43.559,rs9929374,0.003  
16,43.566,rs17764140,0.002  
16,43.571,rs9933675,0.002  
16,43.583,rs8057454,0.001  
16,44.127,rs741718,-0.008  
16,44.146,rs8054407,-0.009  
16,44.671,rs6497575,0.000  
16,44.835,rs8062706,-0.000  
16,45.328,rs8045314,-0.003  
16,45.338,rs687852,-0.001

16,45.344,rs154545,-0.002  
16,45.403,rs209440,-0.021  
16,45.408,rs724466,-0.024  
16,45.410,rs11647526,-0.024  
16,45.432,rs150355,-0.029  
16,45.440,rs2239331,-0.032  
16,45.445,rs208954,-0.030  
16,45.455,rs12932314,-0.026  
16,45.459,rs169660,-0.017  
16,45.485,rs208965,-0.018  
16,45.519,rs916670,-0.004  
16,45.549,rs208633,-0.003  
16,45.573,rs13331654,-0.005  
16,45.580,rs24656,-0.006  
16,45.591,rs8047644,-0.003  
16,45.771,rs4357942,-0.012  
16,45.847,rs2887481,-0.017  
16,45.879,rs17841809,-0.016  
16,45.913,rs152745,-0.015  
16,45.923,rs238551,-0.009  
16,46.213,rs420259,-0.006  
16,46.253,rs17806253,-0.007  
16,46.339,rs7500128,-0.008  
16,46.352,rs8058610,-0.008  
16,46.649,rs2520027,-0.002  
16,46.840,rs11645672,-0.001  
16,46.872,rs9924860,-0.000  
16,47.098,rs196008,-0.000  
16,47.203,rs11859534,0.001  
16,47.214,rs9938849,0.004  
16,47.217,rs4788423,0.005  
16,47.295,rs3785383,0.006  
16,47.337,rs1976194,0.007  
16,47.396,rs9929918,0.002  
16,47.459,rs880824,0.003  
16,47.532,rs9937112,0.011  
16,47.534,rs2283540,0.011  
16,47.553,rs169143,0.017  
16,47.743,rs198178,0.008  
16,47.802,rs198174,0.009  
16,47.811,rs12444655,0.011  
16,47.841,rs4787924,0.016  
16,47.863,rs9940796,0.009  
16,47.901,rs991910,0.014  
16,47.906,rs2283551,0.014  
16,47.944,rs2107118,0.014  
16,47.968,rs2238510,0.018  
16,47.971,rs7187560,0.019  
16,47.988,rs4787985,0.030  
16,48.006,rs12596171,0.034  
16,48.016,rs12149602,0.036  
16,48.048,rs2189290,0.048  
16,48.051,rs9929254,0.051  
16,48.100,rs11074618,0.098  
16,48.133,rs985729,0.111  
16,48.285,rs9930580,0.167  
16,48.313,rs271008,0.178  
16,48.388,rs11649538,0.179  
16,48.396,rs8055948,0.179  
16,48.443,rs3848388,0.177  
16,48.491,rs8059655,0.162

16,48.499,rs17831015,0.160  
16,48.499,rs2033219,0.160  
16,48.520,rs4787646,0.152  
16,48.550,rs802761,0.160  
16,48.593,rs9922232,0.142  
16,48.605,rs7185291,0.140  
16,48.759,rs12923918,0.175  
16,48.824,rs274068,0.187  
16,48.852,rs17178990,0.206  
16,48.854,rs4788437,0.207  
16,48.898,rs16974249,0.222  
16,49.007,rs4787673,0.265  
16,49.060,rs6497790,0.225  
16,49.064,rs16974369,0.223  
16,49.088,rs11642659,0.211  
16,49.186,rs4787697,0.200  
16,49.211,rs962974,0.198  
16,49.502,rs8054701,0.207  
16,49.514,rs2023657,0.209  
16,49.807,rs205153,0.243  
16,49.830,rs205138,0.247  
16,49.918,rs185840,0.283  
16,49.925,rs12932661,0.314  
16,49.949,rs2943313,0.315  
16,50.053,rs2881210,0.316  
16,50.078,rs8055371,0.315  
16,50.089,rs11074709,0.291  
16,50.144,rs17774701,0.266  
16,50.188,rs12325368,0.245  
16,50.193,rs3935368,0.243  
16,50.210,rs7190796,0.253  
16,50.233,rs4319768,0.261  
16,50.257,rs11861610,0.280  
16,50.261,rs9933121,0.283  
16,50.325,rs8061067,0.280  
16,50.353,rs7205880,0.268  
16,50.361,rs8061432,0.292  
16,50.400,rs4381608,0.213  
16,50.435,rs7193424,0.216  
16,50.468,rs4592663,0.253  
16,50.486,rs13336538,0.222  
16,50.492,rs11640710,0.221  
16,50.585,rs11643971,0.235  
16,50.605,rs8050110,0.261  
16,50.627,rs4787792,0.262  
16,50.649,rs11074737,0.263  
16,50.655,rs4073229,0.263  
16,50.666,rs7191801,0.264  
16,50.729,rs3925102,0.276  
16,50.773,rs4787807,0.258  
16,50.830,rs4363867,0.301  
16,50.908,rs6497923,0.285  
16,50.939,rs12924282,0.283  
16,50.999,rs11860466,0.287  
16,51.141,rs3112543,0.295  
16,51.640,rs2188347,0.200  
16,51.678,rs7206138,0.225  
16,51.711,rs11864624,0.225  
16,51.739,rs6497953,0.237  
16,51.762,rs12924567,0.247  
16,51.794,rs17705164,0.287

16,51.812,rs11863159,0.310  
16,51.831,rs171064,0.331  
16,51.844,rs1858880,0.344  
16,51.853,rs2520117,0.335  
16,51.860,rs1363766,0.321  
16,51.962,rs918553,0.351  
16,52.023,rs237142,0.370  
16,52.150,rs8051803,0.372  
16,52.172,rs10492806,0.369  
16,52.354,rs4787384,0.383  
16,52.397,rs12444717,0.386  
16,52.543,rs9921777,0.463  
16,52.639,rs12102836,0.566  
16,52.650,rs493110,0.579  
16,52.668,rs474503,0.585  
16,52.676,rs638422,0.587  
16,52.686,rs1862686,0.590  
16,52.731,rs64493,0.580  
16,52.820,rs195888,0.582  
16,52.837,rs2188777,0.582  
16,52.879,rs723875,0.557  
16,53.035,rs4072945,0.493  
16,53.049,rs9806952,0.419  
16,53.116,rs4238945,0.375  
16,53.195,rs6497984,0.312  
16,53.252,rs4787896,0.303  
16,53.259,rs1515879,0.299  
16,53.292,rs11860481,0.318  
16,53.334,rs11641709,0.341  
16,53.383,rs11823,0.318  
16,53.389,rs11074843,0.294  
16,53.392,rs4787915,0.315  
16,53.412,rs10521142,0.316  
16,53.434,rs12925084,0.318  
16,53.444,rs2347935,0.344  
16,53.445,rs17720179,0.341  
16,53.448,rs4427807,0.341  
16,53.462,rs6498001,0.301  
16,53.488,rs4414501,0.326  
16,53.552,rs1801275,0.411  
16,53.552,rs1049631,0.411  
16,53.560,rs7191188,0.416  
16,53.574,rs2189521,0.405  
16,53.587,rs9930086,0.381  
16,53.591,rs3093308,0.366  
16,53.597,rs3093363,0.331  
16,53.605,rs7184872,0.328  
16,53.626,rs11648096,0.318  
16,53.785,rs11644502,0.342  
16,53.790,rs16976984,0.350  
16,53.792,rs772859,0.349  
16,53.809,rs1645333,0.396  
16,53.811,rs1363749,0.401  
16,53.826,rs11646943,0.398  
16,53.856,rs705919,0.343  
16,53.861,rs705917,0.337  
16,53.873,rs933664,0.320  
16,53.876,rs1862452,0.318  
16,53.904,rs6498053,0.283  
16,53.912,rs4788025,0.276  
16,53.923,rs205371,0.234

16,53.938,rs205389,0.227  
16,53.957,rs205428,0.236  
16,53.992,rs9930464,0.228  
16,54.085,rs12596562,0.199  
16,54.096,rs4255791,0.196  
16,54.127,rs9939450,0.190  
16,54.170,rs12444319,0.181  
16,54.460,rs151229,0.127  
16,54.940,rs3922668,0.047  
16,54.942,rs4788114,0.047  
16,54.972,rs7201546,0.043  
16,54.998,rs3935714,0.038  
16,55.208,rs252308,0.015  
16,55.281,rs11150713,0.010  
16,55.320,rs767812,0.005  
16,55.725,rs11859842,0.002  
16,55.761,rs12596308,0.001  
16,55.974,rs3815822,0.008  
16,56.229,rs8049837,0.011  
16,56.277,rs11865086,0.011  
16,56.703,rs1064524,0.002  
16,56.731,rs2073917,0.002  
16,56.749,rs4243233,0.007  
16,56.812,rs3925075,0.011  
16,56.816,rs1140195,0.001  
16,56.823,rs11646911,0.008  
16,56.836,rs11866987,0.014  
16,56.836,rs1534507,0.014  
16,56.856,rs8056358,0.017  
16,57.038,rs11648801,0.013  
16,57.072,rs345551,0.013  
16,57.089,rs7203265,0.013  
16,58.388,rs3095627,0.000  
16,58.708,rs16945493,-0.000  
16,59.034,rs494116,-0.000  
16,59.047,rs546791,-0.000  
16,59.081,rs6500338,-0.000  
16,59.581,rs8053839,-0.005  
16,59.674,rs12386020,-0.004  
16,59.830,rs1872656,-0.001  
16,59.841,rs4315324,-0.001  
16,60.018,rs7203159,0.001  
16,60.040,rs6500419,0.002  
16,60.052,rs3095653,-0.000  
16,60.134,rs6500206,0.000  
16,60.153,rs1420585,0.004  
16,60.172,rs12148960,0.008  
16,60.185,rs10852588,0.011  
16,60.193,rs1558760,0.011  
16,60.267,rs2908915,0.004  
16,60.316,rs7202988,0.002  
16,60.341,rs1816581,0.001  
16,60.461,rs1469906,0.001  
16,60.693,rs12596388,0.012  
16,60.798,rs27798,0.016  
16,60.830,rs9928068,0.016  
16,60.963,rs4785173,0.017  
16,61.011,rs579980,0.015  
16,61.214,rs12933502,0.019  
16,61.217,rs9924026,0.021  
16,61.225,rs746158,0.028

16,61.419,rs1420676,0.016  
16,61.476,rs8050856,0.012  
16,61.499,rs999022,0.007  
16,61.596,rs11076496,0.014  
16,61.825,rs10521192,0.030  
16,61.884,rs1477025,0.033  
16,62.157,rs2242466,0.032  
16,62.177,rs1362622,0.032  
16,62.343,rs11076508,0.027  
16,62.456,rs4785367,0.045  
16,62.567,rs7204868,0.030  
16,62.642,rs1861648,0.032  
16,62.881,rs4444336,0.036  
16,62.889,rs4268746,0.034  
16,62.928,rs3892156,0.042  
16,62.935,rs9936021,0.044  
16,63.013,rs1548915,0.048  
16,63.059,rs7195270,0.038  
16,63.068,rs7197526,0.039  
16,63.101,rs12444929,0.036  
16,63.104,rs4785426,0.036  
16,63.134,rs8044151,0.035  
16,63.239,rs7204135,0.036  
16,63.244,rs4785439,0.036  
16,63.606,rs11859674,0.041  
16,63.701,rs4785452,0.041  
16,64.035,rs1354810,0.031  
16,64.048,rs1564981,0.030  
16,64.157,rs12599586,0.015  
16,64.237,rs6500361,0.015  
16,64.254,rs7206153,0.014  
16,64.269,rs2160485,0.014  
16,64.379,rs7200613,0.018  
16,64.394,rs7195127,0.016  
16,64.412,rs12102583,0.015  
16,64.413,rs11646341,0.015  
16,64.472,rs3909222,0.012  
16,64.587,rs2193098,0.006  
16,64.679,rs4605159,0.001  
16,64.720,rs8059175,-0.000  
16,64.747,rs7189486,-0.000  
16,64.754,rs7500931,-0.001  
16,64.861,rs7202483,-0.016  
16,65.097,rs1420997,-0.016  
16,65.124,rs16949742,-0.016  
16,65.190,rs2063099,-0.017  
16,65.282,rs1109739,-0.024  
16,65.282,rs2379054,-0.024  
16,65.556,rs2648005,-0.022  
16,65.721,rs16950026,-0.017  
16,65.998,rs12931160,-0.013  
16,66.081,rs8044905,-0.012  
16,66.275,rs9941193,-0.017  
16,66.299,rs8063143,-0.021  
16,66.338,rs1564983,-0.033  
16,66.407,rs4545813,-0.030  
16,66.457,rs11076194,-0.032  
16,66.474,rs4784818,-0.032  
16,66.519,rs12928573,-0.028  
16,66.639,rs9933684,-0.039  
16,66.671,rs185266,-0.043



16,66.674,rs2059232,-0.043  
16,66.780,rs1592490,-0.046  
16,66.792,rs9936886,-0.046  
16,66.942,rs2540764,-0.041  
16,66.963,rs1641354,-0.041  
16,67.138,rs8053169,-0.029  
16,67.188,rs7196579,-0.030  
16,67.287,rs187680,-0.031  
16,67.316,rs12921005,-0.031  
16,67.317,rs12920598,-0.032  
16,67.324,rs1345389,-0.041  
16,67.354,rs1420540,-0.036  
16,67.427,rs1076479,-0.016  
16,67.444,rs187679,-0.021  
16,67.509,rs1420533,-0.007  
16,67.620,rs3112614,-0.005  
16,67.659,rs3104807,-0.005  
16,67.669,rs3104811,-0.009  
16,67.693,rs3104824,-0.004  
16,67.701,rs3112586,-0.004  
16,67.754,rs16951525,-0.004  
16,67.875,rs4784253,-0.020  
16,67.973,rs17298178,-0.019  
16,68.030,rs1579236,-0.018  
16,68.261,rs12149531,-0.026  
16,68.317,rs3931698,-0.029  
16,68.322,rs10852454,-0.039  
16,68.360,rs10153130,-0.044  
16,68.366,rs11649145,-0.045  
16,68.419,rs3852742,-0.043  
16,68.551,rs2388011,-0.032  
16,68.871,rs2041794,-0.027  
16,68.917,rs8056923,-0.033  
16,69.264,rs8050354,-0.022  
16,69.361,rs2302677,-0.021  
16,69.754,rs4386132,-0.014  
16,69.809,rs6499640,-0.015  
16,69.916,rs1861868,-0.007  
16,69.991,rs10852521,-0.000  
16,70.100,rs7199182,0.000  
16,70.225,rs1421090,0.001  
16,70.353,rs21111115,0.008  
16,70.427,rs16952592,0.011  
16,70.567,rs1558756,0.018  
16,70.699,rs8056040,0.025  
16,70.700,rs7188162,0.025  
16,70.706,rs2665274,0.025  
16,70.719,rs7199185,0.015  
16,70.754,rs2665272,0.010  
16,70.758,rs17236708,0.011  
16,70.818,rs8053279,0.010  
16,70.974,rs1013170,0.013  
16,70.993,rs1033046,0.014  
16,71.025,rs2010410,0.016  
16,71.056,rs870565,0.017  
16,71.082,rs8060235,0.022  
16,71.106,rs2302805,0.026  
16,71.176,rs1868689,0.021  
16,71.184,rs8057997,0.023  
16,71.212,rs1530787,0.030  
16,71.219,rs12930159,0.040

16,71.229,rs8056104,0.037  
16,71.245,rs12149279,0.028  
16,71.293,rs7205641,0.025  
16,71.296,rs4784375,0.025  
16,71.307,rs7206352,0.024  
16,71.325,rs4784376,0.021  
16,71.390,rs4784379,0.008  
16,71.426,rs12447268,0.004  
16,71.443,rs4784391,0.003  
16,71.453,rs12925931,0.003  
16,71.455,rs17259245,0.004  
16,71.456,rs12931565,0.004  
16,71.468,rs11647078,0.009  
16,71.511,rs716083,0.012  
16,71.536,rs8063474,0.016  
16,71.560,rs8059628,0.019  
16,71.618,rs9932117,0.019  
16,71.702,rs11076060,0.006  
16,71.798,rs4238770,-0.000  
16,71.826,rs4784442,-0.000  
16,71.872,rs11076064,-0.000  
16,71.876,rs4421976,-0.000  
16,72.013,rs1352191,0.000  
16,72.049,rs1825730,-0.000  
16,72.061,rs9921884,0.000  
16,72.151,rs17210989,0.000  
16,72.165,rs1486735,0.000  
16,72.188,rs11647470,0.000  
16,72.218,rs11076081,-0.000  
16,72.221,rs1948073,-0.000  
16,72.312,rs2397376,-0.016  
16,72.391,rs11649293,-0.041  
16,72.466,rs16954730,-0.055  
16,72.492,rs12928690,-0.058  
16,72.584,rs258586,-0.058  
16,72.701,rs151779,-0.059  
16,72.798,rs1816595,-0.073  
16,72.801,rs12924764,-0.060  
16,72.816,rs16955194,-0.060  
16,72.879,rs243834,-0.061  
16,73.044,rs16955475,-0.038  
16,73.147,rs8051412,-0.048  
16,73.218,rs36024,-0.053  
16,73.239,rs3785152,-0.074  
16,73.251,rs1345429,-0.076  
16,73.257,rs36013,-0.074  
16,73.337,rs258097,-0.053  
16,73.559,rs1420216,-0.034  
16,73.588,rs11076123,-0.031  
16,73.596,rs12446482,-0.025  
16,73.619,rs8056747,-0.011  
16,73.624,rs7194945,-0.009  
16,73.789,rs6499813,-0.003  
16,73.955,rs7189905,-0.000  
16,73.977,rs12927815,-0.000  
16,74.009,rs16956086,0.000  
16,74.127,rs995948,0.001  
16,74.415,rs8043572,0.001  
16,74.460,rs2587888,0.001  
16,74.518,rs2241954,0.003  
16,74.550,rs4924,0.006

16,74.880,rs4783944,0.008  
16,74.885,rs11076156,0.008  
16,74.886,rs9940638,0.008  
16,74.916,rs4784683,0.008  
16,74.921,rs1566441,0.003  
16,74.990,rs8052106,0.001  
16,74.998,rs2161737,0.000  
16,75.019,rs12934166,0.000  
16,75.080,rs7189840,0.002  
16,75.169,rs4784718,0.017  
16,75.182,rs4538013,0.019  
16,75.188,rs4783954,0.019  
16,75.416,rs2241770,0.012  
16,75.502,rs2289119,0.010  
16,75.573,rs28168,0.008  
16,75.655,rs1800775,0.014  
16,75.697,rs1801706,0.016  
16,75.704,rs12934552,0.016  
16,75.709,rs289747,0.016  
16,75.758,rs17370142,0.017  
16,75.794,rs1684578,0.013  
16,75.803,rs289726,0.019  
16,75.858,rs289710,0.019  
16,75.877,rs150366,0.012  
16,75.886,rs11643175,0.010  
16,75.899,rs289721,0.005  
16,75.916,rs7204489,0.005  
16,75.959,rs2305696,0.004  
16,76.008,rs4784779,0.004  
16,76.222,rs8046668,0.006  
16,76.286,rs4566154,0.002  
16,76.354,rs591940,0.000  
16,76.498,rs886434,0.002  
16,76.631,rs604965,0.003  
16,76.696,rs12917875,0.006  
16,76.701,rs11862192,0.006  
16,76.756,rs12599812,0.004  
16,76.760,rs11859308,0.004  
16,76.770,rs1109836,0.002  
16,76.770,rs8047279,0.002  
16,76.775,rs3916059,0.001  
16,76.787,rs8045257,-0.001  
16,76.790,rs7186179,-0.006  
16,76.799,rs2923131,-0.014  
16,76.807,rs2404688,-0.029  
16,76.811,rs2923144,-0.029  
16,76.815,rs2923149,-0.041  
16,76.835,rs4784858,-0.033  
16,76.855,rs10852558,-0.039  
16,76.871,rs1544953,-0.032  
16,76.874,rs838583,-0.034  
16,76.880,rs11864445,-0.025  
16,76.882,rs16959476,-0.023  
16,76.891,rs8049463,-0.016  
16,76.891,rs515155,-0.016  
16,76.897,rs7199303,-0.014  
16,76.901,rs6499924,-0.013  
16,76.903,rs8052097,-0.013  
16,76.960,rs11647309,-0.014  
16,77.272,rs2257931,-0.008  
16,77.380,rs3826096,-0.002

16,77.508,rs4784922,-0.002  
16,77.528,rs4784924,-0.001  
16,77.578,rs3924873,-0.001  
16,77.695,rs3743565,-0.000  
16,77.867,rs4784950,-0.001  
16,77.914,rs13333449,-0.001  
16,78.005,rs2432560,-0.000  
16,78.161,rs11866002,-0.001  
16,78.406,rs12447862,0.001  
16,78.742,rs8057892,0.006  
16,78.753,rs6499982,0.006  
16,78.788,rs8045775,0.008  
16,78.857,rs9939788,0.007  
16,78.903,rs1437176,0.006  
16,79.069,rs6499996,0.006  
16,79.234,rs8055101,0.007  
16,79.296,rs7205211,0.006  
16,79.363,rs1898365,0.005  
16,79.543,rs12051393,0.004  
16,79.624,rs9934713,0.003  
16,79.634,rs4511520,0.004  
16,79.649,rs6500024,0.005  
16,79.678,rs1820258,0.009  
16,79.709,rs6500030,0.011  
16,79.799,rs8062158,0.016  
16,79.824,rs12927552,0.018  
16,79.875,rs1351575,0.022  
16,79.923,rs17258526,0.014  
16,79.975,rs1476307,0.011  
16,79.987,rs2202950,0.011  
16,80.030,rs16961303,0.007  
16,80.054,rs1604117,0.006  
16,80.134,rs4785071,0.006  
16,80.153,rs1550790,0.005  
16,80.215,rs12449087,0.010  
16,80.340,rs2582597,0.011  
16,80.401,rs1364196,0.001  
16,80.518,rs7197884,0.003  
16,80.558,rs1947261,0.011  
16,80.578,rs1423897,0.008  
16,80.618,rs11076382,0.017  
16,80.626,rs1423909,0.017  
16,80.665,rs11861875,0.015  
16,80.690,rs1530795,0.017  
16,80.708,rs1436044,0.018  
16,80.715,rs1993020,0.018  
16,80.762,rs11646830,0.013  
16,80.897,rs1364324,0.009  
16,80.942,rs8055281,0.009  
16,81.092,rs7194678,0.008  
16,81.108,rs985184,0.012  
16,81.113,rs2639889,0.013  
16,81.119,rs9933717,0.015  
16,81.161,rs9921415,0.026  
16,81.167,rs2036801,0.026  
16,81.178,rs1423742,0.018  
16,81.187,rs1374072,0.018  
16,81.393,rs4485351,0.019  
16,81.507,rs7204387,0.012  
16,81.540,rs1344864,0.011  
16,81.752,rs7196235,0.001

16,81.815,rs4620978,-0.000  
16,81.828,rs4545840,-0.000  
16,81.907,rs8063416,-0.003  
16,81.916,rs11865810,-0.003  
16,81.934,rs10500464,-0.004  
16,81.937,rs9302545,-0.004  
16,81.942,rs9929738,-0.004  
16,81.950,rs4784182,-0.005  
16,81.959,rs2408108,-0.005  
16,81.976,rs12598067,-0.005  
16,82.019,rs12925410,-0.004  
16,82.021,rs4784190,-0.004  
16,82.079,rs1834077,-0.001  
16,82.167,rs288579,-0.001  
16,82.171,rs2938721,-0.001  
16,82.225,rs2911309,-0.003  
16,82.235,rs397599,-0.002  
16,82.244,rs1544811,-0.001  
16,82.272,rs1027277,0.000  
16,82.436,rs2962080,0.003  
16,82.492,rs17353186,0.004  
16,82.518,rs2914486,0.005  
16,82.656,rs1605956,0.006  
16,82.707,rs198017,0.005  
16,82.759,rs8043700,0.002  
16,82.789,rs1865826,0.002  
16,82.927,rs150635,0.007  
16,82.948,rs1012248,0.009  
16,82.980,rs16965999,0.009  
16,83.038,rs13335082,0.014  
16,83.077,rs9932227,0.016  
16,83.101,rs1158538,0.016  
16,83.216,rs11865519,0.017  
16,83.237,rs7198575,0.016  
16,83.262,rs12149802,0.014  
16,83.335,rs322613,0.011  
16,83.417,rs8056081,0.012  
16,83.440,rs10500480,0.016  
16,83.446,rs1461186,0.018  
16,83.488,rs9928626,0.024  
16,83.509,rs724051,0.027  
16,83.637,rs1833937,0.028  
16,83.753,rs1437145,0.031  
16,83.870,rs9972785,0.032  
16,83.882,rs1155216,0.032  
16,84.037,rs4371172,0.032  
16,84.097,rs1304340,0.032  
16,84.241,rs4967856,0.032  
16,84.319,rs463625,0.028  
16,84.460,rs4967886,0.026  
16,84.527,rs12918618,0.027  
16,84.603,rs7189335,0.028  
16,84.667,rs8052940,0.022  
16,84.672,rs9939071,0.021  
16,84.680,rs2059243,0.021  
16,84.714,rs1593094,0.019  
16,84.723,rs1423826,0.018  
16,84.724,rs9927847,0.018  
16,84.727,rs951379,0.018  
16,84.755,rs8044752,0.021  
16,84.782,rs1110756,0.022

16,84.799,rs1110530,0.023  
16,84.812,rs1966503,0.016  
16,84.817,rs560996,0.016  
16,84.830,rs27616,0.027  
16,85.423,rs6979,0.095  
16,86.092,rs8050499,0.084  
16,86.097,rs12599487,0.084  
16,86.289,rs8059194,0.070  
16,86.346,rs2276330,0.083  
16,86.464,rs8062856,0.117  
16,86.607,rs16958736,0.134  
16,86.619,rs11649369,0.135  
16,86.632,rs3785073,0.137  
16,86.653,rs8044057,0.143  
16,86.654,rs4783704,0.144  
16,86.670,rs246134,0.149  
16,86.700,rs13330891,0.169  
16,86.701,rs12445849,0.169  
16,86.701,rs10445010,0.170  
16,86.800,rs9889219,0.203  
16,86.892,rs3790083,0.222  
16,87.250,rs2070203,0.237  
16,87.275,rs2271047,0.238  
16,87.283,rs4985367,0.212  
16,87.900,rs3826247,0.216  
16,88.012,rs6499515,0.213  
16,88.548,rs7203231,0.182  
16,88.852,rs12708923,0.168  
16,88.893,rs3213422,0.166  
16,89.258,rs8060878,0.130  
16,89.346,rs11646048,0.146  
16,90.850,rs4788477,0.139  
16,90.860,rs8051826,0.126  
16,90.879,rs9940161,0.108  
16,90.892,rs13329908,0.105  
16,90.913,rs11863839,0.078  
16,90.924,rs11075971,0.067  
16,90.968,rs8054577,0.035  
16,90.986,rs7404068,0.019  
16,91.013,rs1423730,0.003  
16,91.023,rs6564635,0.002  
16,91.030,rs4011585,0.002  
16,91.038,rs6564865,0.002  
16,91.041,rs963303,0.002  
16,91.070,rs2113268,0.001  
16,91.080,rs11642077,0.002  
16,91.102,rs1364064,0.004  
16,91.104,rs12930291,0.004  
16,91.128,rs1364223,0.020  
16,91.134,rs1424011,0.024  
16,91.162,rs8046139,0.031  
16,91.168,rs4888447,0.029  
16,91.174,rs825838,0.022  
16,91.178,rs16972157,0.023  
16,91.180,rs16972167,0.024  
16,91.181,rs7191888,0.025  
16,91.196,rs705894,0.047  
16,91.280,rs12920607,0.031  
16,91.303,rs1038864,0.039  
16,91.311,rs1492564,0.029  
16,91.311,rs9933173,0.029

16,91.313,rs388379,0.028  
16,91.321,rs7192167,0.035  
16,91.323,rs2019811,0.037  
16,91.328,rs6564532,0.038  
16,91.343,rs8063430,0.035  
16,91.360,rs1873724,0.024  
16,91.366,rs753808,0.024  
16,91.388,rs2729613,0.030  
16,91.391,rs16972698,0.030  
16,91.406,rs1973619,0.030  
16,91.416,rs9673361,0.030  
16,91.502,rs2526057,0.038  
16,91.510,rs2716555,0.037  
16,91.513,rs12934360,0.036  
16,91.528,rs2716606,0.030  
16,91.546,rs6564902,0.014  
16,91.581,rs7187327,0.012  
16,91.591,rs2550466,0.012  
16,91.614,rs807293,0.020  
16,91.777,rs11641117,0.011  
16,91.913,rs4888262,0.003  
16,91.956,rs9932977,-0.000  
16,91.970,rs886548,-0.001  
16,91.984,rs11643479,-0.001  
16,91.990,rs7185697,-0.001  
16,92.008,rs4556811,-0.002  
16,92.060,rs8049101,-0.000  
16,92.438,rs15819,0.000  
16,92.771,rs7206003,-0.002  
16,92.903,rs11149807,-0.010  
16,92.966,rs4243110,-0.014  
16,92.987,rs4888367,-0.015  
16,93.011,rs11641943,-0.019  
16,93.013,rs10871308,-0.019  
16,93.106,rs100912,-0.008  
16,93.106,rs247445,-0.011  
16,93.209,rs2865802,-0.009  
16,93.272,rs3096362,-0.008  
16,93.326,rs7501326,-0.010  
16,93.330,rs13333708,-0.010  
16,93.335,rs7195599,-0.010  
16,93.343,rs12447346,-0.011  
16,93.374,rs11864176,-0.011  
16,93.379,rs7199697,-0.010  
16,93.385,rs1498056,-0.009  
16,93.416,rs977045,-0.016  
16,93.421,rs364635,-0.016  
16,93.615,rs2194295,-0.019  
16,93.647,rs11866636,-0.020  
16,93.672,rs8059365,-0.021  
16,93.961,rs9923061,-0.026  
16,94.371,rs1506836,-0.048  
16,94.570,rs7186058,-0.057  
16,94.773,rs2340274,-0.070  
16,94.993,rs6564350,-0.061  
16,95.055,rs11149913,-0.058  
16,95.090,rs12599583,-0.045  
16,95.097,rs7186700,-0.045  
16,95.138,rs12926306,-0.045  
16,95.269,rs11149915,-0.043  
16,95.587,rs7192798,-0.046

16,95.629,rs17679567,-0.046  
16,95.670,rs1496961,-0.061  
16,95.702,rs1982955,-0.065  
16,95.729,rs4888580,-0.069  
16,95.765,rs678792,-0.069  
16,95.853,rs6564386,-0.070  
16,95.878,rs8056764,-0.066  
16,95.916,rs8046951,-0.062  
16,95.965,rs13338146,-0.056  
16,95.974,rs7204495,-0.055  
16,96.040,rs9319508,-0.051  
16,96.056,rs9930984,-0.049  
16,96.090,rs2562112,-0.044  
16,96.138,rs8053681,-0.034  
16,96.145,rs12443792,-0.033  
16,96.146,rs11149991,-0.033  
16,96.148,rs768503,-0.033  
16,96.162,rs749754,-0.040  
16,96.958,rs1493892,-0.070  
16,97.383,rs7204177,-0.079  
16,97.555,rs283003,-0.081  
16,98.214,rs280866,-0.081  
16,98.397,rs446663,-0.081  
16,98.542,rs2344149,-0.082  
16,98.664,rs10163466,-0.076  
16,98.788,rs12444317,-0.068  
16,98.997,rs308936,-0.055  
16,99.022,rs16946398,-0.045  
16,99.034,rs9927857,-0.041  
16,99.069,rs2914451,-0.026  
16,99.084,rs8048132,-0.023  
16,99.093,rs1609913,-0.023  
16,99.100,rs8052795,-0.029  
16,99.101,rs254772,-0.030  
16,99.103,rs173855,-0.030  
16,99.122,rs376490,-0.031  
16,99.125,rs11863454,-0.026  
16,99.128,rs9935467,-0.012  
16,99.329,rs1126047,-0.005  
16,99.332,rs372627,-0.010  
16,99.351,rs8058686,-0.009  
16,99.357,rs11645365,-0.010  
16,99.371,rs387138,-0.019  
16,99.372,rs625108,-0.019  
16,99.394,rs3886360,-0.039  
16,99.395,rs3886126,-0.042  
16,99.398,rs9924879,-0.047  
16,99.499,rs391578,-0.024  
16,99.515,rs7193514,-0.025  
16,100.053,rs1922617,-0.037  
16,100.332,rs9933156,-0.057  
16,100.421,rs7190335,-0.060  
16,100.488,rs17572291,-0.064  
16,100.499,rs17572451,-0.066  
16,100.500,rs11641394,-0.066  
16,100.510,rs12599158,-0.083  
16,100.526,rs4319778,-0.114  
16,100.689,rs2943768,-0.163  
16,100.868,rs2550626,-0.253  
16,100.894,rs2113120,-0.264  
16,100.963,rs2550655,-0.315



16,100.993,rs6564576,-0.265  
16,101.018,rs1110556,-0.251  
16,101.116,rs9925796,-0.216  
16,101.173,rs7199110,-0.212  
16,101.245,rs9932331,-0.223  
16,101.292,rs11863800,-0.231  
16,101.354,rs2037961,-0.241  
16,101.371,rs9941131,-0.243  
16,101.404,rs4888860,-0.305  
16,101.409,rs6420411,-0.337  
16,101.463,rs8054190,-0.356  
16,101.477,rs9926713,-0.341  
16,101.501,rs1394572,-0.318  
16,101.567,rs11864605,-0.287  
16,101.609,rs2221434,-0.275  
16,101.629,rs1510218,-0.268  
16,101.636,rs2134993,-0.256  
16,101.643,rs982784,-0.239  
16,101.647,rs11859772,-0.234  
16,101.652,rs4888881,-0.246  
16,101.660,rs8047671,-0.272  
16,101.677,rs13333229,-0.300  
16,101.686,rs4888884,-0.278  
16,101.721,rs10871358,-0.281  
16,101.741,rs12929249,-0.261  
16,101.760,rs4887997,-0.243  
16,101.779,rs924870,-0.216  
16,101.832,rs9941213,-0.248  
16,101.863,rs2550731,-0.277  
16,101.878,rs16949222,-0.295  
16,101.929,rs8055815,-0.438  
16,101.974,rs2550685,-0.455  
16,102.026,rs9930132,-0.453  
16,102.034,rs12446495,-0.451  
16,102.047,rs17648647,-0.463  
16,102.097,rs9939718,-0.421  
16,102.285,rs8051649,-0.324  
16,102.286,rs11150140,-0.324  
16,102.410,rs383362,-0.273  
16,102.550,rs270434,-0.267  
16,102.715,rs12444231,-0.272  
16,102.729,rs1121985,-0.272  
16,102.825,rs4888957,-0.260  
16,102.941,rs12444393,-0.238  
16,102.952,rs17798093,-0.238  
16,102.983,rs9939535,-0.234  
16,103.008,rs13333910,-0.231  
16,103.011,rs12920268,-0.232  
16,103.081,rs9926937,-0.248  
16,103.117,rs10514457,-0.257  
16,103.139,rs2067709,-0.262  
16,103.230,rs2720445,-0.232  
16,103.280,rs1364096,-0.195  
16,103.325,rs8053822,-0.163  
16,103.342,rs250157,-0.158  
16,103.403,rs1559341,-0.156  
16,103.430,rs11858998,-0.158  
16,103.489,rs8045611,-0.140  
16,103.507,rs7196953,-0.135  
16,103.519,rs7206046,-0.136  
16,103.572,rs12051063,-0.141

16,103.621,rs7184694,-0.142  
16,103.656,rs8048539,-0.135  
16,103.749,rs11866972,-0.139  
16,103.794,rs3813583,-0.142  
16,103.975,rs12919529,-0.150  
16,104.379,rs4627366,-0.128  
16,104.453,rs11150236,-0.118  
16,104.563,rs4556797,-0.120  
16,104.609,rs11648597,-0.120  
16,104.654,rs4889071,-0.122  
16,104.859,rs4889102,-0.138  
16,104.889,rs16952464,-0.138  
16,104.981,rs12102710,-0.142  
16,104.983,rs8045952,-0.142  
16,105.162,rs13339499,-0.133  
16,105.307,rs4889126,-0.136  
16,105.488,rs8055798,-0.130  
16,105.600,rs2654468,-0.148  
16,105.603,rs10514493,-0.148  
16,105.724,rs1484032,-0.145  
16,105.740,rs12446859,-0.144  
16,105.948,rs7190676,-0.134  
16,105.995,rs4889149,-0.133  
16,106.010,rs4888091,-0.132  
16,106.066,rs8058847,-0.128  
16,106.192,rs4496160,-0.114  
16,106.329,rs7187808,-0.116  
16,106.563,rs8057859,-0.157  
16,106.883,rs8046061,-0.176  
16,107.356,rs2549773,-0.210  
16,107.371,rs2549769,-0.211  
16,107.407,rs1833973,-0.217  
16,107.512,rs7191668,-0.248  
16,107.583,rs16954298,-0.250  
16,107.635,rs7188127,-0.261  
16,107.771,rs1469122,-0.264  
16,108.064,rs7198494,-0.304  
16,108.231,rs4888121,-0.276  
16,108.248,rs8045357,-0.276  
16,108.279,rs4889241,-0.271  
16,108.323,rs7204299,-0.263  
16,108.390,rs1563073,-0.257  
16,108.411,rs8043708,-0.235  
16,108.440,rs1901819,-0.260  
16,108.579,rs12596232,-0.333  
16,108.648,rs6564851,-0.313  
16,108.753,rs6564863,-0.386  
16,108.808,rs4889298,-0.395  
16,109.090,rs6564872,-0.443  
16,109.325,rs2550766,-0.506  
16,109.369,rs310007,-0.533  
16,109.427,rs12596138,-0.520  
16,109.433,rs9940384,-0.518  
16,109.451,rs2317240,-0.508  
16,109.475,rs2966122,-0.459  
16,109.605,rs8063007,-0.408  
16,109.637,rs8053235,-0.417  
16,109.862,rs11644375,-0.496  
16,109.912,rs12599865,-0.481  
16,109.988,rs6564894,-0.493  
16,110.014,rs4506892,-0.505

16,110.015,rs7185203,-0.470  
16,110.097,rs17201098,-0.545  
16,110.183,rs4889356,-0.581  
16,110.201,rs7500611,-0.594  
16,110.274,rs1128658,-0.688  
16,110.288,rs8063999,-0.705  
16,110.438,rs3808613,-0.659  
16,110.572,rs8059445,-0.560  
16,110.585,rs12446319,-0.521  
16,110.594,rs13337444,-0.527  
16,110.712,rs4328435,-0.631  
16,110.764,rs4580153,-0.721  
16,110.796,rs12598194,-0.799  
16,110.813,rs12448334,-0.813  
16,110.911,rs6420427,-0.791  
16,111.079,rs4888181,-0.832  
16,111.082,rs12596639,-0.831  
16,111.114,rs4243218,-0.830  
16,111.181,rs8063355,-0.816  
16,111.193,rs4133125,-0.812  
16,111.247,rs4889432,-0.817  
16,111.291,rs11859107,-0.875  
16,111.321,rs11865090,-0.913  
16,111.343,rs3922849,-0.943  
16,111.353,rs7203619,-0.939  
16,111.449,rs8055043,-0.898  
16,111.477,rs9928191,-0.891  
16,111.867,rs8048090,-0.787  
16,111.891,rs4243229,-0.783  
16,112.101,rs10514525,-0.731  
16,112.430,rs7205603,-0.661  
16,112.442,rs918759,-0.659  
16,112.650,rs7193238,-0.652  
16,112.717,rs12102745,-0.650  
16,112.760,rs9930179,-0.647  
16,112.797,rs4782727,-0.671  
16,112.820,rs9924628,-0.658  
16,113.128,rs4082514,-0.629  
16,113.196,rs1826240,-0.622  
16,113.451,rs1364245,-0.586  
16,113.512,rs11864743,-0.588  
16,113.557,rs9889106,-0.588  
16,113.743,rs4783112,-0.603  
16,113.811,rs8182119,-0.577  
16,113.840,rs3936367,-0.561  
16,113.846,rs8044364,-0.561  
16,113.860,rs17820141,-0.601  
16,114.029,rs4783227,-0.622  
16,114.064,rs7186479,-0.637  
16,114.109,rs3852716,-0.664  
16,114.126,rs3910214,-0.675  
16,114.234,rs16957844,-0.740  
16,114.248,rs3844412,-0.750  
16,114.357,rs12922394,-0.706  
16,114.362,rs3910232,-0.704  
16,114.363,rs17261378,-0.702  
16,114.382,rs1433157,-0.657  
16,114.415,rs3852732,-0.746  
16,114.443,rs8057927,-0.715  
16,114.557,rs8060937,-0.669  
16,114.607,rs1015972,-0.661

16,114.830,rs1350888,-0.667  
16,114.845,rs735922,-0.665  
16,114.981,rs12934135,-0.650  
16,114.989,rs1870849,-0.649  
16,115.007,rs4783276,-0.647  
16,115.013,rs12929663,-0.648  
16,115.044,rs1381499,-0.655  
16,115.164,rs2549160,-0.670  
16,115.521,rs4783300,-0.653  
16,115.587,rs7499431,-0.671  
16,115.680,rs741591,-0.658  
16,115.740,rs8046196,-0.667  
16,115.987,rs8060673,-0.648  
16,116.063,rs4528558,-0.651  
16,116.241,rs6565116,-0.656  
16,116.330,rs12716962,-0.607  
16,116.361,rs7188901,-0.620  
16,116.388,rs4782749,-0.574  
16,116.563,rs7191254,-0.511  
16,116.688,rs8046479,-0.464  
16,116.865,rs12933790,-0.334  
16,116.871,rs11150556,-0.361  
16,116.874,rs11860907,-0.325  
16,116.880,rs1895535,-0.323  
16,116.935,rs7195392,-0.309  
16,116.982,rs12444181,-0.332  
16,116.986,rs8182199,-0.333  
16,117.057,rs7201419,-0.349  
16,117.334,rs9319441,-0.251  
16,117.344,rs1424176,-0.251  
16,117.396,rs17213769,-0.242  
16,117.427,rs9319442,-0.236  
16,117.432,rs17287186,-0.235  
16,117.536,rs8054845,-0.224  
16,117.583,rs12919501,-0.227  
16,117.712,rs4476163,-0.236  
16,117.734,rs4074375,-0.254  
16,117.758,rs11149574,-0.275  
16,117.838,rs8061801,-0.320  
16,117.943,rs8055016,-0.348  
16,117.969,rs11859453,-0.355  
16,118.023,rs6563943,-0.372  
16,118.038,rs12445729,-0.381  
16,118.211,rs1364114,-0.456  
16,118.292,rs12932980,-0.486  
16,118.420,rs12927653,-0.513  
16,118.448,rs422455,-0.512  
16,118.487,rs12934964,-0.549  
16,118.524,rs10514597,-0.554  
16,118.525,rs2326023,-0.554  
16,118.650,rs462407,-0.529  
16,118.981,rs11149606,-0.514  
16,119.009,rs7186171,-0.525  
16,119.070,rs12598185,-0.544  
16,119.146,rs9923900,-0.566  
16,119.200,rs4782865,-0.533  
16,119.257,rs4782574,-0.551  
16,119.362,rs16962458,-0.458  
16,119.382,rs3881,-0.441  
16,119.391,rs1876963,-0.435  
16,119.418,rs11864146,-0.412

16,119.449,rs2875853,-0.390  
16,119.453,rs4782873,-0.417  
16,119.455,rs7184659,-0.418  
16,119.531,rs13332704,-0.431  
16,119.607,rs3817151,-0.397  
16,119.709,rs11647035,-0.384  
16,119.982,rs2288024,-0.353  
16,120.026,rs2875859,-0.349  
16,120.047,rs2303242,-0.349  
16,120.080,rs244887,-0.388  
16,120.133,rs16963074,-0.423  
16,120.178,rs1862835,-0.464  
16,120.225,rs173430,-0.520  
16,120.237,rs390112,-0.522  
16,120.284,rs244853,-0.540  
16,120.288,rs11649239,-0.541  
16,120.373,rs425422,-0.531  
16,120.419,rs4782918,-0.543  
16,120.422,rs2326207,-0.544  
16,120.456,rs244791,-0.556  
16,120.469,rs4782607,-0.560  
16,120.495,rs3826144,-0.562  
16,120.503,rs432666,-0.563  
16,120.574,rs4782612,-0.560  
16,120.640,rs7202571,-0.557  
16,120.703,rs2326253,-0.575  
16,120.725,rs11645513,-0.568  
16,120.741,rs922450,-0.556  
16,120.783,rs247820,-0.531  
16,120.788,rs12102757,-0.567  
16,120.789,rs247811,-0.565  
16,120.865,rs442134,-0.549  
16,120.881,rs4782626,-0.542  
16,120.883,rs2303853,-0.539  
16,120.903,rs247892,-0.512  
16,120.930,rs747718,-0.550  
16,121.018,rs2288574,-0.563  
16,121.142,rs12923411,-0.611  
16,121.269,rs6564059,-0.651  
16,121.286,rs1366754,-0.700  
16,121.311,rs7458,-0.660  
16,121.323,rs2099132,-0.658  
16,121.385,rs12051025,-0.646  
16,121.397,rs4783024,-0.684  
16,121.420,rs2018540,-0.646  
16,121.443,rs2052904,-0.615  
16,121.462,rs2966318,-0.626  
16,121.535,rs2550415,-0.724  
16,121.557,rs889615,-0.745  
16,121.597,rs2550412,-0.783  
16,121.661,rs4783043,-0.794  
16,121.728,rs12925758,-0.798  
16,122.145,rs4572384,-0.732  
16,122.269,rs12931881,-0.580  
16,122.473,rs2934468,-0.516  
16,122.490,rs10221162,-0.515  
16,122.871,rs3803638,-0.482  
16,122.924,rs3829514,-0.480  
16,122.930,rs870149,-0.479  
16,122.947,rs4783121,-0.475  
16,122.999,rs7196620,-0.433

16,123.048,rs3794687,-0.437  
16,123.053,rs1566465,-0.437  
16,123.097,rs8050910,-0.443  
16,123.154,rs17201064,-0.375  
16,123.156,rs16975257,-0.376  
16,123.214,rs9940866,-0.350  
16,123.239,rs1875250,-0.316  
16,123.242,rs2937134,-0.315  
16,123.318,rs4589542,-0.310  
16,123.363,rs4072655,-0.308  
16,123.444,rs4783146,-0.326  
16,123.568,rs9928615,-0.409  
16,123.719,rs8060135,-0.441  
16,123.767,rs8047113,-0.475  
16,123.801,rs11863116,-0.504  
16,123.850,rs1008712,-0.582  
16,123.865,rs8049833,-0.591  
16,123.997,rs8060803,-0.587  
16,124.004,rs2326526,-0.587  
16,124.005,rs4783169,-0.592  
16,124.013,rs4783170,-0.632  
16,124.091,rs4783172,-0.667  
16,124.166,rs8056420,-0.554  
16,124.182,rs4783187,-0.533  
16,124.234,rs8052629,-0.565  
16,124.263,rs10163269,-0.565  
16,124.327,rs1552272,-0.560  
16,124.352,rs2035489,-0.601  
16,124.587,rs7185290,-0.652  
16,124.659,rs8061209,-0.591  
16,124.674,rs8053670,-0.577  
16,124.691,rs4783226,-0.616  
16,124.756,rs4072443,-0.577  
16,124.786,rs7498829,-0.558  
16,124.863,rs7184557,-0.529  
16,124.986,rs6540278,-0.490  
16,125.131,rs4843971,-0.438  
16,125.208,rs11640338,-0.410  
16,125.580,rs7197318,-0.383  
16,126.035,rs6540225,-0.291  
16,126.038,rs16939798,-0.291  
16,126.111,rs2017161,-0.283  
16,126.136,rs433322,-0.284  
16,126.176,rs305079,-0.294  
16,126.242,rs11117425,-0.267  
16,126.244,rs8050476,-0.272  
16,126.250,rs305059,-0.287  
16,126.261,rs731707,-0.290  
16,126.264,rs305087,-0.284  
16,126.271,rs1915033,-0.264  
16,126.323,rs4843880,-0.195  
16,126.371,rs8058948,-0.147  
16,126.379,rs7196849,-0.137  
16,126.390,rs8045539,-0.108  
16,126.458,rs4843892,-0.101  
16,126.473,rs1568389,-0.102  
16,126.500,rs17818634,-0.112  
16,126.502,rs12443633,-0.095  
16,126.507,rs12600278,-0.092  
16,126.518,rs16940375,-0.089  
16,126.534,rs8049798,-0.079

16,126.536,rs7202346,-0.079  
16,126.558,rs4843344,-0.081  
16,126.570,rs4843903,-0.081  
16,126.577,rs11117445,-0.080  
16,126.582,rs6540259,-0.079  
16,126.632,rs12446545,-0.072  
16,126.650,rs12918889,-0.084  
16,126.745,rs276984,-0.067  
16,126.803,rs276981,-0.079  
16,126.819,rs276968,-0.065  
16,126.821,rs2280028,-0.065  
16,126.864,rs16940625,-0.066  
16,126.872,rs1621902,-0.064  
16,126.884,rs1693947,-0.073  
16,126.891,rs11648522,-0.064  
16,126.913,rs4843922,-0.066  
16,126.933,rs1704494,-0.065  
16,126.980,rs717482,-0.067  
16,127.058,rs2665316,-0.053  
16,127.115,rs2696838,-0.030  
16,127.128,rs2581300,-0.030  
16,127.141,rs12598669,-0.032  
16,127.192,rs4843364,-0.046  
16,127.210,rs16941019,-0.048  
16,127.215,rs902552,-0.049  
16,127.219,rs1728393,-0.050  
16,127.267,rs1728400,-0.070  
16,127.284,rs1881219,-0.076  
16,127.289,rs16941196,-0.065  
16,127.290,rs12598581,-0.063  
16,127.293,rs16941207,-0.064  
16,127.303,rs12917932,-0.066  
16,127.334,rs9938060,-0.068  
16,127.365,rs11117500,-0.078  
16,127.381,rs11642177,-0.078  
16,127.442,rs9652656,-0.076  
16,127.463,rs7204236,-0.076  
16,127.529,rs2113236,-0.080  
16,127.536,rs7204028,-0.079  
16,127.621,rs11646450,-0.070  
16,127.703,rs12448905,-0.074  
16,127.814,rs1867485,-0.070  
16,127.887,rs439485,-0.090  
16,127.921,rs7189606,-0.101  
16,127.932,rs16941895,-0.087  
16,127.933,rs299948,-0.086  
16,127.946,rs8046054,-0.096  
16,127.956,rs9941282,-0.113  
16,127.961,rs300004,-0.128  
16,127.996,rs10514618,-0.175  
16,127.998,rs16942004,-0.176  
16,128.011,rs8057453,-0.171  
16,128.038,rs2053638,-0.158  
16,128.047,rs11640511,-0.153  
16,128.049,rs11642036,-0.153  
16,128.052,rs7499944,-0.153  
16,128.099,rs8054640,-0.181  
16,128.139,rs8055182,-0.204  
16,128.153,rs16942225,-0.199  
16,128.264,rs4843467,-0.205  
16,128.292,rs4843470,-0.206

16,128.309,rs13380717,-0.202  
16,128.368,rs4072137,-0.198  
16,128.442,rs8043658,-0.213  
16,128.586,rs8063188,-0.306  
16,128.636,rs11862201,-0.324  
16,128.697,rs11646219,-0.332  
16,128.710,rs17836147,-0.362  
16,128.716,rs4843516,-0.330  
16,128.719,rs3849258,-0.331  
16,128.774,rs4843529,-0.332  
16,128.803,rs4843534,-0.339  
16,128.828,rs9928856,-0.344  
16,128.844,rs1465452,-0.358  
16,128.895,rs4843549,-0.404  
16,129.033,rs1862788,-0.477  
16,129.135,rs11649260,-0.529  
16,129.363,rs3893298,-0.564  
16,129.489,rs3909282,-0.554  
16,129.518,rs888647,-0.548  
16,129.526,rs9929765,-0.546  
16,129.536,rs3812974,-0.542  
16,129.601,rs2290018,-0.516  
16,129.606,rs3794671,-0.513  
16,129.650,rs4843693,-0.485  
16,129.666,rs17699859,-0.491  
16,129.694,rs9936204,-0.499  
16,129.731,rs7192741,-0.483  
16,129.779,rs16943315,-0.462  
16,129.785,rs11865049,-0.454  
16,129.889,rs12926841,-0.336  
16,129.911,rs11863558,-0.337  
16,129.945,rs4843745,-0.357  
16,130.091,rs4843783,-0.329  
16,130.140,rs6540170,-0.343  
16,130.182,rs7206177,-0.386  
16,130.201,rs4843811,-0.405  
16,130.277,rs12597413,-0.462  
16,130.284,rs8051233,-0.462  
16,130.459,rs4072556,-0.434  
16,130.579,rs7500313,-0.488  
16,130.609,rs8058066,-0.487  
16,130.654,rs11640794,-0.494  
16,130.685,rs904800,-0.499  
16,130.738,rs17782553,-0.510  
16,130.760,rs12447718,-0.526  
16,130.797,rs1993993,-0.508  
16,130.816,rs2334242,-0.510  
16,130.849,rs4782451,-0.503  
16,130.921,rs885157,-0.499  
16,130.922,rs17773540,-0.499  
16,130.936,rs8062466,-0.501  
16,130.959,rs12709102,-0.467  
16,130.980,rs4782395,-0.466  
16,130.989,rs4420519,-0.471  
16,130.996,rs4074632,-0.473  
16,131.022,rs8060693,-0.516  
16,131.050,rs8060966,-0.485  
16,131.092,rs750740,-0.473  
16,131.113,rs3743975,-0.466  
16,131.119,rs7203655,-0.502  
16,131.144,rs2968482,-0.505



16,131.157,rs837763,-0.504  
16,131.183,rs480727,-0.437  
16,131.196,rs550269,-0.455  
16,131.298,rs2911451,-0.470  
16,131.323,rs488251,-0.471  
16,131.355,rs538778,-0.458  
16,131.400,rs9932459,-0.418  
16,131.411,rs4129789,-0.445  
16,131.454,rs7498845,-0.436  
16,131.764,rs11076775,-0.514  
16,131.774,rs9921361,-0.514  
16,131.893,rs3102350,-0.458  
16,132.080,rs2965817,-0.400  
16,132.378,rs7188458,-0.352  
16,132.475,rs7204478,-0.311  
16,132.737,rs3212346,-0.307  
16,132.823,rs4408545,-0.307  
16,132.844,rs7201721,-0.308  
16,132.906,rs7498985,-0.312  
16,132.943,rs2078478,-0.312  
17,0.099,rs1136388,-0.012  
17,0.112,rs12938802,-0.013  
17,0.132,rs8078223,-0.007  
17,0.145,rs4890194,-0.007  
17,0.147,rs8075084,-0.007  
17,0.157,rs8074031,-0.007  
17,0.189,rs12452527,-0.028  
17,0.192,rs7224163,-0.027  
17,0.193,rs7219680,-0.027  
17,0.197,rs7208188,-0.027  
17,0.200,rs4617924,-0.030  
17,0.222,rs7223270,-0.025  
17,0.233,rs9915773,-0.021  
17,0.261,rs4354994,-0.015  
17,0.266,rs4074549,-0.008  
17,0.279,rs4073769,-0.008  
17,0.296,rs7224337,-0.010  
17,0.305,rs12450248,-0.011  
17,0.346,rs8069970,-0.016  
17,0.386,rs4247113,-0.017  
17,0.454,rs6565724,-0.006  
17,0.749,rs3744732,-0.013  
17,0.754,rs4968145,-0.013  
17,0.768,rs741677,-0.013  
17,0.833,rs11247553,-0.014  
17,0.953,rs838369,-0.011  
17,1.068,rs2740349,-0.004  
17,1.076,rs2291778,-0.004  
17,1.188,rs623323,-0.002  
17,1.229,rs516937,-0.001  
17,1.320,rs561261,-0.005  
17,1.432,rs16956027,-0.003  
17,1.451,rs8066620,-0.007  
17,1.505,rs4968122,-0.012  
17,1.788,rs1692197,-0.012  
17,1.817,rs8066894,-0.012  
17,1.863,rs2467248,-0.012  
17,1.958,rs9907824,-0.007  
17,1.961,rs7209796,-0.007  
17,1.989,rs11657026,-0.007  
17,2.047,rs12948820,-0.016

17,2.074,rs11247565,-0.020  
17,2.140,rs7222776,-0.024  
17,2.206,rs12939584,-0.027  
17,2.280,rs7221017,-0.024  
17,2.391,rs2663330,-0.021  
17,2.555,rs2586238,-0.016  
17,2.656,rs1057358,-0.006  
17,2.749,rs7218427,-0.003  
17,2.825,rs2247953,-0.000  
17,2.859,rs2120233,-0.000  
17,2.901,rs2257540,-0.000  
17,3.063,rs7406978,0.000  
17,3.143,rs2083811,0.004  
17,3.183,rs11655015,0.006  
17,3.354,rs11867310,0.007  
17,3.500,rs8076943,0.007  
17,3.521,rs6502542,0.008  
17,3.616,rs6502862,0.014  
17,3.904,rs4790082,0.031  
17,3.959,rs16945809,0.036  
17,4.237,rs2302456,0.070  
17,4.303,rs7218128,0.080  
17,4.338,rs1109303,0.084  
17,4.408,rs15362,0.089  
17,4.596,rs6502793,0.111  
17,4.675,rs4790666,0.129  
17,4.791,rs4790232,0.125  
17,4.917,rs17821354,0.108  
17,5.070,rs2293067,0.116  
17,5.240,rs8076353,0.143  
17,5.574,rs4790814,0.202  
17,5.845,rs8075977,0.234  
17,6.000,rs11062,0.239  
17,6.722,rs8077346,0.298  
17,6.827,rs1131636,0.322  
17,6.903,rs7208143,0.296  
17,7.222,rs9646401,0.286  
17,7.225,rs7208125,0.295  
17,7.226,rs11651343,0.296  
17,7.229,rs4790859,0.298  
17,7.235,rs11867392,0.320  
17,7.245,rs1048483,0.328  
17,7.265,rs11655099,0.294  
17,7.274,rs2126202,0.285  
17,7.315,rs3213714,0.207  
17,7.333,rs11871981,0.189  
17,7.335,rs4268798,0.187  
17,7.355,rs4369716,0.176  
17,7.356,rs4790344,0.176  
17,7.358,rs8080511,0.174  
17,7.383,rs12938775,0.174  
17,7.395,rs7212318,0.159  
17,7.396,rs7219019,0.159  
17,7.399,rs2317225,0.162  
17,7.450,rs11653568,0.191  
17,7.523,rs1124040,0.212  
17,7.571,rs1476460,0.228  
17,7.635,rs6502555,0.230  
17,7.664,rs9747501,0.220  
17,7.665,rs16952454,0.220  
17,7.682,rs8072031,0.229

17,7.706,rs2873468,0.246  
17,7.728,rs7223284,0.256  
17,7.752,rs9908991,0.256  
17,7.774,rs4287603,0.234  
17,7.832,rs9907411,0.199  
17,7.838,rs9907207,0.174  
17,7.924,rs4790386,0.089  
17,7.967,rs2317469,0.054  
17,8.000,rs4790393,0.051  
17,8.015,rs12950579,0.053  
17,8.028,rs9912533,0.055  
17,8.058,rs8080301,0.059  
17,8.093,rs6502656,0.054  
17,8.093,rs7220383,0.054  
17,8.143,rs7217169,0.061  
17,8.244,rs4790417,0.048  
17,8.268,rs4077990,0.044  
17,8.278,rs11867500,0.042  
17,8.470,rs4790427,0.023  
17,8.510,rs769433,0.022  
17,8.528,rs11657822,0.022  
17,8.540,rs12449465,0.022  
17,9.364,rs226357,0.035  
17,9.470,rs9903864,0.038  
17,9.573,rs7209613,0.034  
17,9.636,rs923376,0.022  
17,9.637,rs1873061,0.021  
17,9.639,rs6502727,0.014  
17,9.651,rs2279567,0.015  
17,9.682,rs11656519,0.020  
17,9.690,rs11649929,0.021  
17,9.745,rs7212403,0.017  
17,9.776,rs401643,0.024  
17,9.867,rs4790522,0.034  
17,9.911,rs150908,0.036  
17,10.045,rs222787,0.029  
17,10.115,rs222778,0.029  
17,10.300,rs170209,0.042  
17,10.305,rs178323,0.049  
17,10.367,rs2737139,0.067  
17,10.379,rs9916609,0.073  
17,10.415,rs11653095,0.084  
17,10.446,rs4300684,0.080  
17,10.447,rs3809805,0.080  
17,10.450,rs2891,0.079  
17,10.572,rs9135,0.106  
17,10.603,rs9914305,0.146  
17,10.623,rs887389,0.167  
17,10.649,rs2074989,0.181  
17,10.675,rs8076916,0.187  
17,10.685,rs887387,0.193  
17,10.705,rs12453022,0.194  
17,10.885,rs2176323,0.204  
17,10.998,rs9907500,0.192  
17,11.249,rs8066746,0.163  
17,11.358,rs17764251,0.147  
17,11.378,rs4790611,0.144  
17,11.549,rs9912168,0.118  
17,11.561,rs4239045,0.116  
17,11.636,rs16953945,0.099  
17,11.640,rs12601491,0.097

17,11.640,rs4790634,0.096  
17,11.675,rs333117,0.062  
17,11.697,rs9896111,0.037  
17,11.708,rs7213707,0.033  
17,11.716,rs4790638,0.033  
17,11.742,rs1351231,0.026  
17,11.794,rs7216284,0.019  
17,11.849,rs4597375,0.009  
17,11.869,rs8076149,0.007  
17,11.945,rs748694,0.004  
17,12.079,rs4790694,0.004  
17,12.100,rs1050998,0.003  
17,12.112,rs3826517,0.002  
17,12.138,rs9890937,-0.000  
17,12.162,rs4790229,-0.001  
17,12.189,rs4790706,-0.002  
17,12.247,rs1052751,-0.010  
17,12.543,rs426475,-0.015  
17,12.653,rs8072032,-0.017  
17,13.300,rs9893995,-0.015  
17,13.338,rs2074437,-0.015  
17,13.405,rs1805453,-0.014  
17,13.474,rs11651270,-0.014  
17,13.630,rs2733366,-0.004  
17,13.688,rs925599,-0.002  
17,13.728,rs2716932,-0.001  
17,13.888,rs2058364,-0.002  
17,14.578,rs4985692,-0.000  
17,14.685,rs7217165,0.000  
17,14.866,rs11655838,0.003  
17,14.915,rs7218600,0.004  
17,14.930,rs1362765,0.004  
17,15.012,rs8080504,0.003  
17,15.013,rs11078592,0.003  
17,15.182,rs17178900,0.003  
17,15.302,rs7218232,0.006  
17,15.533,rs8076557,0.007  
17,15.687,rs12936643,0.012  
17,15.982,rs1183141,0.022  
17,15.997,rs967787,0.022  
17,16.222,rs1970983,0.020  
17,16.235,rs9907608,0.018  
17,16.271,rs7207644,0.006  
17,16.288,rs16955393,0.007  
17,16.307,rs8064677,0.003  
17,16.319,rs9902061,0.003  
17,16.405,rs8076894,0.000  
17,16.419,rs7213280,-0.000  
17,16.465,rs2302837,-0.001  
17,16.490,rs2302838,-0.003  
17,16.525,rs4468679,-0.007  
17,16.570,rs7207798,-0.009  
17,16.662,rs7223723,-0.015  
17,16.889,rs4796449,-0.026  
17,16.910,rs6502938,-0.027  
17,16.918,rs7219963,-0.027  
17,16.993,rs9902576,-0.029  
17,17.146,rs9894371,-0.032  
17,17.234,rs4796467,-0.035  
17,17.947,rs9900150,-0.044  
17,18.086,rs218655,-0.068

17,18.185,rs218687,-0.112  
17,18.291,rs218671,-0.132  
17,18.303,rs8072966,-0.139  
17,18.349,rs16956192,-0.129  
17,18.415,rs218685,-0.137  
17,18.654,rs955461,-0.167  
17,18.809,rs906749,-0.170  
17,18.885,rs1509121,-0.179  
17,19.153,rs8078571,-0.175  
17,19.458,rs311759,-0.147  
17,19.504,rs7211486,-0.147  
17,19.575,rs2135845,-0.143  
17,19.720,rs1126667,-0.126  
17,19.826,rs4796576,-0.112  
17,19.908,rs17805145,-0.097  
17,19.986,rs11653054,-0.077  
17,20.008,rs314239,-0.068  
17,20.027,rs12951306,-0.061  
17,20.080,rs314245,-0.049  
17,20.084,rs1237044,-0.060  
17,20.205,rs11650232,-0.047  
17,20.477,rs3744405,-0.036  
17,20.503,rs11652407,-0.048  
17,20.510,rs2270981,-0.050  
17,20.540,rs4796407,-0.066  
17,20.553,rs17732672,-0.069  
17,20.581,rs7219773,-0.064  
17,20.610,rs8075459,-0.049  
17,20.648,rs3853818,-0.034  
17,20.702,rs4265880,-0.034  
17,20.720,rs2269459,-0.034  
17,20.784,rs10438740,-0.020  
17,20.855,rs2955617,-0.019  
17,20.879,rs1641510,-0.018  
17,20.899,rs8079544,-0.020  
17,20.936,rs7141,-0.024  
17,20.963,rs839721,-0.024  
17,20.973,rs8077824,-0.024  
17,21.015,rs17806045,-0.019  
17,21.062,rs872346,-0.015  
17,21.062,rs9916791,-0.015  
17,21.063,rs7213894,-0.015  
17,21.216,rs11650083,-0.035  
17,21.317,rs4130509,-0.048  
17,21.354,rs8073913,-0.057  
17,21.371,rs12603935,-0.056  
17,21.391,rs4792199,-0.056  
17,21.410,rs2289587,-0.035  
17,21.413,rs7215658,-0.018  
17,21.532,rs7503353,-0.040  
17,21.687,rs1861952,-0.044  
17,21.695,rs8069620,-0.044  
17,21.741,rs1695213,-0.048  
17,21.790,rs12150003,-0.033  
17,21.843,rs3817003,-0.025  
17,22.208,rs1579523,-0.021  
17,22.213,rs8068795,-0.021  
17,22.220,rs9897780,-0.021  
17,22.439,rs7222961,-0.024  
17,22.549,rs4632172,-0.025  
17,22.786,rs8071193,-0.029

17,23.024,rs4497735,-0.035  
17,23.091,rs9912143,-0.049  
17,23.112,rs195770,-0.051  
17,23.431,rs383123,-0.074  
17,23.482,rs411268,-0.083  
17,23.488,rs427554,-0.081  
17,23.542,rs9895992,-0.071  
17,23.611,rs10491087,-0.068  
17,23.685,rs613229,-0.070  
17,23.695,rs9892906,-0.071  
17,23.736,rs12951810,-0.074  
17,23.749,rs7219148,-0.076  
17,23.825,rs940854,-0.089  
17,23.936,rs17808998,-0.116  
17,23.960,rs9913468,-0.116  
17,24.058,rs4641781,-0.117  
17,24.080,rs7211163,-0.118  
17,24.206,rs2072321,-0.116  
17,24.400,rs7225607,-0.098  
17,24.416,rs7221329,-0.099  
17,24.484,rs16958048,-0.104  
17,24.537,rs12940357,-0.107  
17,24.554,rs9897341,-0.109  
17,24.559,rs1009675,-0.110  
17,24.647,rs3744656,-0.109  
17,24.683,rs2302198,-0.106  
17,24.743,rs7206985,-0.120  
17,24.812,rs7215786,-0.119  
17,24.863,rs9915637,-0.127  
17,24.930,rs1558214,-0.188  
17,24.967,rs2551799,-0.196  
17,24.998,rs12938765,-0.198  
17,25.109,rs11658644,-0.201  
17,25.205,rs8071380,-0.204  
17,25.310,rs8070753,-0.202  
17,25.532,rs8073431,-0.221  
17,25.567,rs7215204,-0.223  
17,25.574,rs9902096,-0.281  
17,25.707,rs9904459,-0.268  
17,25.827,rs4791838,-0.271  
17,25.951,rs4791841,-0.293  
17,25.984,rs3891720,-0.298  
17,26.013,rs2168856,-0.293  
17,26.157,rs16958408,-0.315  
17,26.479,rs4275899,-0.402  
17,26.658,rs6503235,-0.373  
17,27.096,rs3913649,-0.377  
17,27.188,rs2654725,-0.400  
17,27.321,rs185677,-0.475  
17,27.422,rs8067933,-0.530  
17,27.512,rs11655932,-0.559  
17,27.684,rs9303245,-0.613  
17,27.766,rs4791876,-0.490  
17,27.872,rs3786122,-0.449  
17,27.917,rs7218549,-0.457  
17,28.192,rs2286531,-0.567  
17,28.214,rs8069231,-0.575  
17,28.338,rs8072109,-0.546  
17,28.492,rs11653099,-0.638  
17,28.510,rs3826529,-0.650  
17,28.530,rs740664,-0.651

17,28.794,rs8079743,-0.497  
17,29.115,rs8080606,-0.510  
17,29.137,rs12601160,-0.482  
17,29.151,rs16959323,-0.488  
17,29.171,rs1476440,-0.501  
17,29.222,rs739353,-0.580  
17,29.227,rs11652587,-0.584  
17,29.244,rs3764429,-0.565  
17,29.341,rs7219805,-0.549  
17,29.350,rs7211216,-0.553  
17,29.362,rs6503290,-0.558  
17,29.369,rs11870887,-0.560  
17,29.370,rs2051667,-0.561  
17,29.503,rs8066598,-0.640  
17,29.520,rs4128644,-0.651  
17,29.563,rs4791935,-0.693  
17,29.627,rs8067942,-0.745  
17,29.736,rs4791950,-0.816  
17,29.787,rs8077735,-0.825  
17,29.839,rs9913807,-0.811  
17,29.877,rs4239112,-0.814  
17,29.941,rs4791962,-0.841  
17,29.944,rs12602333,-0.836  
17,29.993,rs4451986,-0.741  
17,29.994,rs4791965,-0.741  
17,30.087,rs999338,-0.714  
17,30.156,rs4451985,-0.686  
17,30.189,rs8067532,-0.662  
17,30.259,rs2072265,-0.605  
17,30.291,rs7213488,-0.584  
17,30.584,rs2007027,-0.644  
17,30.633,rs3744566,-0.653  
17,30.752,rs2041127,-0.667  
17,30.810,rs8079868,-0.670  
17,30.901,rs201611,-0.658  
17,30.945,rs2662959,-0.592  
17,30.993,rs2520150,-0.579  
17,31.140,rs7217562,-0.541  
17,31.144,rs2165875,-0.540  
17,31.202,rs992750,-0.496  
17,31.216,rs10852926,-0.485  
17,31.245,rs8078933,-0.469  
17,31.261,rs7207511,-0.461  
17,31.278,rs6503334,-0.487  
17,31.375,rs860420,-0.461  
17,31.510,rs1118198,-0.480  
17,31.529,rs2024072,-0.515  
17,31.532,rs11655962,-0.515  
17,31.537,rs2874502,-0.514  
17,31.565,rs758112,-0.469  
17,31.593,rs7207977,-0.493  
17,31.620,rs4791439,-0.486  
17,31.794,rs9907306,-0.469  
17,31.818,rs1610053,-0.505  
17,31.852,rs9896385,-0.505  
17,32.020,rs4389174,-0.510  
17,32.055,rs9906456,-0.488  
17,32.061,rs16944322,-0.483  
17,32.174,rs1877644,-0.468  
17,32.212,rs2908948,-0.476  
17,32.224,rs11655824,-0.478

17,32.235,rs11658629,-0.481  
17,32.416,rs973358,-0.511  
17,32.420,rs16944856,-0.510  
17,32.425,rs1978344,-0.508  
17,32.877,rs11078021,-0.596  
17,32.918,rs3809729,-0.547  
17,32.956,rs4792152,-0.529  
17,32.969,rs929466,-0.490  
17,33.010,rs12936449,-0.533  
17,33.045,rs11649836,-0.578  
17,33.115,rs9896319,-0.582  
17,33.659,rs3744583,-0.594  
17,33.679,rs11078030,-0.585  
17,33.728,rs4539641,-0.562  
17,33.774,rs7225157,-0.567  
17,33.856,rs7225975,-0.583  
17,33.962,rs9892871,-0.647  
17,34.111,rs8070243,-0.669  
17,34.214,rs4792189,-0.719  
17,34.312,rs12453561,-0.761  
17,34.562,rs9788973,-0.751  
17,34.647,rs7207011,-0.737  
17,34.758,rs11078062,-0.682  
17,34.835,rs16945805,-0.660  
17,34.866,rs2529718,-0.652  
17,34.873,rs2529727,-0.644  
17,34.913,rs7225431,-0.591  
17,34.958,rs7209652,-0.597  
17,35.032,rs400575,-0.546  
17,35.048,rs4792258,-0.522  
17,35.063,rs237325,-0.496  
17,35.063,rs10521196,-0.495  
17,35.112,rs180750,-0.424  
17,35.126,rs1350703,-0.362  
17,35.169,rs237293,-0.425  
17,35.185,rs4791499,-0.457  
17,35.295,rs12150051,-0.444  
17,35.403,rs7219494,-0.404  
17,35.447,rs8072823,-0.384  
17,35.545,rs2052003,-0.366  
17,35.602,rs9303058,-0.364  
17,35.702,rs11657113,-0.382  
17,35.743,rs12452239,-0.391  
17,35.951,rs3785731,-0.429  
17,36.030,rs8082179,-0.415  
17,36.150,rs12165053,-0.447  
17,36.199,rs9906503,-0.455  
17,36.228,rs882653,-0.457  
17,36.272,rs8076914,-0.461  
17,36.343,rs3785716,-0.463  
17,36.366,rs2240570,-0.475  
17,36.455,rs4792311,-0.485  
17,36.529,rs11658800,-0.475  
17,36.618,rs9893477,-0.453  
17,36.624,rs1003902,-0.453  
17,36.701,rs7220714,-0.454  
17,36.704,rs7207136,-0.453  
17,36.753,rs7207964,-0.420  
17,36.756,rs974683,-0.419  
17,36.779,rs11652225,-0.409  
17,36.885,rs2674948,-0.358



17,36.930,rs2188892,-0.348  
17,37.000,rs2674962,-0.324  
17,37.090,rs8064833,-0.300  
17,37.117,rs8072892,-0.285  
17,37.125,rs17564279,-0.280  
17,37.127,rs7211590,-0.279  
17,37.300,rs4792347,-0.227  
17,37.400,rs4792349,-0.211  
17,37.697,rs2158077,-0.090  
17,37.890,rs1029674,-0.080  
17,37.999,rs3859253,-0.084  
17,38.070,rs2996009,-0.078  
17,38.162,rs7214164,-0.097  
17,38.313,rs7209938,-0.101  
17,38.368,rs12943793,-0.093  
17,38.597,rs3785702,-0.074  
17,38.689,rs4588021,-0.077  
17,38.746,rs12952904,-0.077  
17,38.994,rs727547,-0.100  
17,39.377,rs11078180,-0.103  
17,39.388,rs4054823,-0.121  
17,39.478,rs9892571,-0.154  
17,39.511,rs748928,-0.152  
17,39.522,rs765101,-0.154  
17,39.606,rs6502298,-0.166  
17,39.634,rs9910389,-0.191  
17,39.638,rs1867231,-0.192  
17,39.694,rs2322969,-0.197  
17,39.757,rs4280292,-0.215  
17,39.783,rs8080993,-0.218  
17,39.927,rs7226344,-0.227  
17,40.087,rs746590,-0.205  
17,40.236,rs2078340,-0.219  
17,40.240,rs11657682,-0.218  
17,40.276,rs12943477,-0.255  
17,40.294,rs9913851,-0.253  
17,40.353,rs8075653,-0.244  
17,40.377,rs11651964,-0.247  
17,40.447,rs1005628,-0.246  
17,40.461,rs6502321,-0.211  
17,40.483,rs8077302,-0.164  
17,40.519,rs2159132,-0.174  
17,40.545,rs9909412,-0.188  
17,40.659,rs2856177,-0.208  
17,40.697,rs8066913,-0.229  
17,41.086,rs7217154,-0.220  
17,41.319,rs4791569,-0.223  
17,41.510,rs2190625,-0.242  
17,41.542,rs4791571,-0.245  
17,41.544,rs886862,-0.245  
17,41.576,rs1005321,-0.240  
17,41.672,rs9890916,-0.224  
17,41.773,rs2127998,-0.244  
17,41.830,rs2127996,-0.222  
17,41.858,rs4792477,-0.203  
17,41.910,rs1994029,-0.194  
17,41.940,rs17692591,-0.197  
17,41.951,rs3912263,-0.196  
17,41.981,rs2127994,-0.193  
17,42.053,rs6502354,-0.184  
17,42.211,rs2022240,-0.194

17,42.282,rs16949616,-0.200  
17,42.519,rs622272,-0.220  
17,42.614,rs12936254,-0.212  
17,42.706,rs7219146,-0.207  
17,42.898,rs2323453,-0.209  
17,43.004,rs12451822,-0.173  
17,43.014,rs12944663,-0.162  
17,43.044,rs2075442,-0.118  
17,43.063,rs9303115,-0.095  
17,43.082,rs11649886,-0.089  
17,43.118,rs1866430,-0.087  
17,43.150,rs893581,-0.080  
17,43.156,rs11871749,-0.080  
17,43.215,rs10521281,-0.080  
17,43.233,rs8068028,-0.081  
17,43.299,rs8067255,-0.080  
17,43.415,rs2215300,-0.115  
17,43.481,rs8064512,-0.139  
17,43.524,rs6502401,-0.124  
17,43.535,rs1016144,-0.120  
17,43.583,rs11078274,-0.102  
17,43.663,rs9900486,-0.090  
17,43.715,rs4792567,-0.087  
17,43.745,rs8078179,-0.082  
17,43.757,rs917541,-0.081  
17,43.797,rs9899309,-0.061  
17,43.828,rs16950911,-0.061  
17,43.830,rs12949826,-0.061  
17,43.901,rs8077409,-0.063  
17,43.927,rs16830,-0.064  
17,43.961,rs8078279,-0.066  
17,43.993,rs2191116,-0.075  
17,44.102,rs9906227,-0.078  
17,44.253,rs230950,-0.089  
17,44.510,rs2323657,-0.099  
17,44.578,rs8066838,-0.132  
17,44.595,rs12449918,-0.140  
17,44.605,rs2323661,-0.141  
17,44.617,rs764701,-0.146  
17,44.679,rs11653435,-0.112  
17,44.769,rs4791622,-0.092  
17,44.791,rs7219850,-0.073  
17,44.933,rs2938158,-0.065  
17,45.073,rs4792630,-0.073  
17,45.173,rs2074890,-0.078  
17,45.258,rs17776733,-0.076  
17,45.381,rs2240593,-0.091  
17,45.642,rs578065,-0.103  
17,45.985,rs8074888,-0.118  
17,46.253,rs178791,-0.131  
17,46.295,rs17779879,-0.123  
17,46.415,rs1558241,-0.097  
17,46.443,rs608624,-0.100  
17,46.451,rs571877,-0.100  
17,46.457,rs2970065,-0.100  
17,46.466,rs11649741,-0.100  
17,46.578,rs8065506,-0.078  
17,46.944,rs4985694,-0.077  
17,46.963,rs8074984,-0.076  
17,46.977,rs9907308,-0.074  
17,47.115,rs10852845,-0.042

17,47.232,rs3744124,-0.022  
17,47.297,rs1029830,-0.015  
17,47.343,rs7226068,-0.013  
17,47.360,rs10852849,-0.012  
17,47.369,rs242253,-0.011  
17,47.372,rs1242473,-0.011  
17,47.377,rs7223820,-0.011  
17,47.424,rs7225831,-0.009  
17,47.465,rs1242492,-0.008  
17,47.629,rs7224619,-0.019  
17,47.662,rs11654526,-0.020  
17,47.710,rs1006656,-0.021  
17,47.914,rs17731766,-0.026  
17,47.945,rs2975004,-0.028  
17,48.028,rs1378602,-0.029  
17,48.130,rs9902498,-0.034  
17,48.362,rs4441330,-0.063  
17,48.395,rs8071574,-0.067  
17,48.447,rs4244595,-0.070  
17,48.504,rs4924935,-0.053  
17,48.560,rs11657284,-0.053  
17,48.579,rs2076562,-0.053  
17,48.580,rs1634413,-0.052  
17,48.581,rs9903337,-0.052  
17,48.597,rs2472717,-0.063  
17,48.605,rs8070758,-0.063  
17,48.947,rs11658544,-0.031  
17,48.982,rs2440154,-0.030  
17,49.030,rs8074500,-0.027  
17,49.075,rs1042183,-0.038  
17,49.103,rs157386,-0.041  
17,49.110,rs157407,-0.041  
17,49.212,rs7218708,-0.046  
17,49.386,rs9909852,-0.037  
17,49.492,rs17762379,-0.025  
17,49.498,rs1382779,-0.025  
17,49.880,rs1815569,-0.039  
17,49.966,rs7222400,-0.033  
17,50.010,rs9911289,-0.034  
17,50.055,rs899343,-0.030  
17,50.071,rs17771193,-0.030  
17,50.080,rs8064815,-0.030  
17,50.112,rs8070360,-0.030  
17,50.113,rs899333,-0.030  
17,50.158,rs732928,-0.030  
17,50.234,rs1320252,-0.021  
17,50.259,rs4985855,-0.028  
17,50.306,rs9889782,-0.037  
17,50.336,rs12453531,-0.036  
17,50.343,rs7406009,-0.036  
17,50.563,rs2169915,-0.040  
17,50.715,rs4889705,-0.050  
17,52.849,rs7223436,-0.071  
17,52.867,rs7207347,-0.071  
17,52.920,rs4239230,-0.061  
17,52.998,rs940015,-0.066  
17,53.009,rs2948527,-0.066  
17,53.011,rs2945387,-0.066  
17,53.026,rs2948519,-0.070  
17,53.050,rs12945695,-0.070  
17,53.101,rs4795430,-0.071

17,53.113,rs2027993,-0.073  
17,53.287,rs3764866,-0.075  
17,53.340,rs2191090,-0.073  
17,54.024,rs968726,-0.071  
17,54.060,rs8081659,-0.072  
17,54.331,rs4794848,-0.071  
17,54.467,rs7212295,-0.069  
17,54.877,rs8077048,-0.055  
17,54.893,rs11868474,-0.055  
17,55.324,rs542939,-0.037  
17,55.364,rs3744626,-0.036  
17,55.647,rs12941382,-0.042  
17,56.087,rs6354,-0.045  
17,56.215,rs2129785,-0.037  
17,56.438,rs3110093,-0.027  
17,57.167,rs216457,-0.016  
17,58.640,rs3760318,-0.013  
17,58.801,rs9915181,-0.014  
17,60.734,rs4258685,-0.013  
17,60.779,rs7406402,-0.013  
17,60.889,rs178858,-0.013  
17,61.109,rs9909944,-0.019  
17,61.241,rs1548471,-0.017  
17,61.424,rs223128,-0.008  
17,61.452,rs8075034,-0.008  
17,61.511,rs223138,-0.006  
17,62.231,rs894725,-0.029  
17,62.477,rs12162135,-0.021  
17,62.586,rs10775410,-0.014  
17,62.592,rs17733497,-0.014  
17,62.644,rs225206,-0.016  
17,62.657,rs4795708,-0.015  
17,62.726,rs11868228,-0.013  
17,62.768,rs321183,-0.012  
17,63.334,rs4795729,-0.030  
17,63.344,rs2188952,-0.036  
17,63.351,rs28958,-0.041  
17,63.370,rs12938484,-0.036  
17,63.415,rs16589,-0.025  
17,63.515,rs11657055,-0.028  
17,63.557,rs9895456,-0.017  
17,63.568,rs9889583,-0.018  
17,63.571,rs7212997,-0.018  
17,63.573,rs319774,-0.018  
17,63.589,rs16968117,-0.018  
17,63.627,rs2275,-0.020  
17,63.666,rs319763,-0.030  
17,63.675,rs319749,-0.030  
17,63.704,rs7209079,-0.034  
17,63.728,rs1497366,-0.029  
17,63.815,rs4795769,-0.043  
17,63.891,rs1354492,-0.054  
17,63.909,rs2036535,-0.057  
17,63.919,rs1553494,-0.060  
17,63.941,rs1123025,-0.055  
17,63.988,rs7214958,-0.056  
17,64.007,rs12942506,-0.063  
17,64.088,rs964459,-0.048  
17,64.169,rs1560916,-0.035  
17,64.171,rs9908335,-0.035  
17,64.192,rs11658327,-0.036

17,64.213,rs280048,-0.037  
17,64.223,rs280043,-0.037  
17,64.236,rs7220362,-0.038  
17,64.253,rs10512451,-0.039  
17,64.293,rs7209819,-0.037  
17,64.314,rs9908295,-0.037  
17,64.333,rs2951665,-0.040  
17,64.389,rs10512454,-0.055  
17,64.477,rs6505380,-0.071  
17,64.541,rs2881782,-0.061  
17,64.609,rs317342,-0.074  
17,64.684,rs317373,-0.079  
17,64.694,rs11867369,-0.083  
17,64.761,rs11869615,-0.108  
17,64.867,rs11650066,-0.099  
17,64.868,rs915478,-0.099  
17,64.888,rs8070999,-0.105  
17,64.915,rs317331,-0.116  
17,64.936,rs317366,-0.123  
17,64.983,rs8081899,-0.165  
17,65.007,rs9892726,-0.175  
17,65.034,rs4451997,-0.164  
17,65.067,rs3744516,-0.171  
17,65.322,rs11080254,-0.184  
17,65.332,rs2097761,-0.167  
17,65.355,rs7217519,-0.153  
17,65.403,rs8075337,-0.163  
17,65.507,rs1860180,-0.182  
17,65.513,rs8075846,-0.183  
17,65.598,rs17574949,-0.246  
17,65.657,rs756882,-0.292  
17,65.665,rs9895330,-0.310  
17,65.670,rs159251,-0.320  
17,65.749,rs213135,-0.355  
17,65.758,rs4306569,-0.347  
17,65.768,rs4255823,-0.330  
17,65.780,rs6505413,-0.283  
17,65.821,rs7209036,-0.322  
17,65.830,rs7214380,-0.328  
17,65.850,rs4795007,-0.336  
17,65.870,rs11654085,-0.311  
17,65.909,rs9900451,-0.300  
17,65.935,rs9916211,-0.270  
17,65.936,rs1860276,-0.270  
17,65.937,rs4636954,-0.267  
17,65.943,rs11650365,-0.250  
17,65.945,rs8182290,-0.247  
17,65.948,rs8071265,-0.246  
17,66.008,rs1990264,-0.212  
17,66.069,rs12453075,-0.212  
17,66.278,rs4795048,-0.215  
17,66.314,rs1482103,-0.216  
17,66.369,rs3744358,-0.223  
17,66.479,rs936656,-0.215  
17,66.512,rs3736143,-0.219  
17,66.598,rs1383541,-0.176  
17,66.630,rs3744364,-0.207  
17,66.647,rs9908966,-0.187  
17,66.665,rs11080335,-0.186  
17,66.681,rs16970816,-0.186  
17,66.769,rs11869519,-0.199

17,66.862,rs8078470,-0.232  
17,66.866,rs7214197,-0.235  
17,66.906,rs8065626,-0.253  
17,66.908,rs4796089,-0.254  
17,66.911,rs17549947,-0.256  
17,66.995,rs321601,-0.331  
17,67.133,rs2063979,-0.332  
17,67.208,rs7217473,-0.341  
17,67.208,rs854685,-0.341  
17,67.372,rs854658,-0.339  
17,67.412,rs854672,-0.286  
17,67.535,rs854462,-0.311  
17,67.617,rs11080372,-0.302  
17,68.073,rs2306589,-0.246  
17,68.097,rs2306595,-0.256  
17,68.216,rs10491120,-0.323  
17,68.221,rs757010,-0.326  
17,68.223,rs211994,-0.327  
17,68.231,rs211981,-0.344  
17,68.247,rs9889382,-0.355  
17,68.250,rs12949442,-0.350  
17,68.259,rs9890738,-0.337  
17,68.265,rs17561428,-0.327  
17,68.285,rs1899650,-0.282  
17,68.311,rs756060,-0.292  
17,68.360,rs295886,-0.304  
17,68.427,rs7207884,-0.270  
17,68.431,rs8074928,-0.263  
17,68.453,rs2270662,-0.164  
17,68.478,rs11652230,-0.146  
17,68.486,rs2088367,-0.123  
17,68.487,rs17651045,-0.120  
17,68.508,rs1109593,-0.141  
17,68.525,rs12936981,-0.104  
17,68.636,rs1634332,-0.092  
17,68.648,rs11870749,-0.088  
17,68.745,rs9906543,-0.050  
17,68.924,rs4795194,-0.026  
17,69.015,rs853231,-0.018  
17,69.083,rs763512,-0.013  
17,69.103,rs1048701,-0.012  
17,69.194,rs12936144,-0.008  
17,69.205,rs4074770,-0.008  
17,69.214,rs4794756,-0.009  
17,69.225,rs3094515,-0.005  
17,69.226,rs2285741,-0.004  
17,69.231,rs1859211,-0.004  
17,69.245,rs2158254,-0.003  
17,69.251,rs3110644,-0.001  
17,69.253,rs11649743,-0.001  
17,69.258,rs7407025,-0.000  
17,69.274,rs4430796,-0.000  
17,69.284,rs17626423,0.000  
17,69.303,rs4795224,0.000  
17,69.350,rs2138733,0.005  
17,69.364,rs7215724,0.005  
17,69.710,rs8066158,-0.002  
17,69.714,rs8067381,-0.003  
17,69.717,rs6503608,-0.005  
17,69.746,rs7502216,-0.005  
17,69.859,rs8080886,-0.005

17,69.874,rs3892952,-0.006  
17,69.880,rs4795294,-0.006  
17,69.926,rs4794786,-0.011  
17,69.939,rs2075053,-0.012  
17,70.000,rs708692,-0.014  
17,70.035,rs2338115,-0.014  
17,70.052,rs228307,-0.014  
17,70.151,rs979607,-0.016  
17,70.170,rs226212,-0.017  
17,70.171,rs17590228,-0.017  
17,70.178,rs3785461,-0.016  
17,70.213,rs82977,-0.006  
17,70.230,rs660413,-0.003  
17,70.240,rs573556,-0.002  
17,70.346,rs8070153,-0.003  
17,70.453,rs11658255,-0.007  
17,70.474,rs557570,-0.010  
17,70.478,rs16495,-0.011  
17,70.508,rs657723,-0.019  
17,70.544,rs521633,-0.042  
17,70.554,rs486512,-0.043  
17,71.129,rs1877032,-0.034  
17,71.291,rs8067378,-0.034  
17,71.345,rs4065321,-0.050  
17,71.362,rs2071369,-0.052  
17,71.409,rs2071427,-0.056  
17,71.410,rs12941497,-0.056  
17,71.415,rs16965644,-0.057  
17,71.549,rs2715553,-0.064  
17,71.616,rs538399,-0.055  
17,71.630,rs749906,-0.053  
17,71.633,rs4890115,-0.053  
17,71.679,rs3136685,-0.050  
17,71.765,rs2429552,-0.047  
17,71.804,rs981684,-0.035  
17,71.817,rs7219451,-0.034  
17,71.865,rs7212483,-0.034  
17,71.869,rs2315504,-0.034  
17,71.913,rs9257,-0.033  
17,72.255,rs7220116,-0.043  
17,72.569,rs2604953,-0.046  
17,72.573,rs12948056,-0.046  
17,72.588,rs2071600,-0.049  
17,72.599,rs2301354,-0.051  
17,72.618,rs736932,-0.057  
17,72.624,rs768027,-0.058  
17,72.688,rs1008753,-0.055  
17,72.693,rs1076188,-0.099  
17,72.694,rs2079009,-0.102  
17,72.918,rs6503695,-0.173  
17,73.378,rs11649877,-0.143  
17,73.508,rs2593595,-0.135  
17,73.508,rs2229611,-0.135  
17,73.532,rs2880540,-0.093  
17,73.533,rs12941802,-0.100  
17,73.534,rs739770,-0.101  
17,73.534,rs1398882,-0.102  
17,73.535,rs9911324,-0.122  
17,73.535,rs1107748,-0.107  
17,73.536,rs7216471,-0.108  
17,73.538,rs1234612,-0.105

17,73.548,rs423757,-0.129  
17,73.679,rs2072081,-0.095  
17,73.707,rs2074107,-0.089  
17,73.754,rs2011951,-0.081  
17,73.804,rs11867692,-0.101  
17,73.863,rs6503398,-0.107  
17,73.919,rs8067833,-0.112  
17,73.931,rs736866,-0.116  
17,73.990,rs2269746,-0.123  
17,74.003,rs713101,-0.121  
17,74.016,rs12944434,-0.118  
17,74.019,rs7224944,-0.118  
17,74.043,rs4986172,-0.116  
17,74.300,rs2074289,-0.095  
17,74.320,rs7216796,-0.093  
17,74.338,rs2435200,-0.098  
17,74.378,rs9904280,-0.093  
17,74.386,rs7225002,-0.090  
17,75.091,rs199494,-0.059  
17,75.107,rs10514911,-0.059  
17,75.151,rs11079738,-0.059  
17,75.173,rs2083797,-0.059  
17,75.194,rs12952746,-0.059  
17,75.210,rs4968282,-0.073  
17,75.230,rs197943,-0.071  
17,75.317,rs2316758,-0.062  
17,75.446,rs1713494,-0.066  
17,75.503,rs12947008,-0.062  
17,75.509,rs11570460,-0.061  
17,75.613,rs9895150,-0.060  
17,75.618,rs11079764,-0.073  
17,76.197,rs10514929,-0.067  
17,76.872,rs11870935,-0.059  
17,77.164,rs12950390,-0.078  
17,77.433,rs2325752,-0.083  
17,78.034,rs2278868,-0.078  
17,78.292,rs7209556,-0.070  
17,78.465,rs10853100,-0.078  
17,78.690,rs8064938,-0.108  
17,78.704,rs4793601,-0.111  
17,78.760,rs12942387,-0.122  
17,78.799,rs7207403,-0.136  
17,78.848,rs2293217,-0.157  
17,78.928,rs617182,-0.161  
17,78.959,rs7216993,-0.163  
17,78.966,rs2233669,-0.164  
17,78.973,rs2584684,-0.165  
17,78.976,rs4794054,-0.165  
17,78.978,rs2412101,-0.179  
17,78.979,rs1319888,-0.189  
17,78.983,rs584589,-0.169  
17,78.983,rs2671683,-0.170  
17,78.984,rs603769,-0.170  
17,78.991,rs2671650,-0.217  
17,79.033,rs6504618,-0.203  
17,79.095,rs11658310,-0.207  
17,79.109,rs2289600,-0.210  
17,79.196,rs755736,-0.256  
17,79.205,rs3785928,-0.254  
17,79.264,rs271672,-0.250  
17,79.267,rs271675,-0.250



17,79.283,rs271650,-0.242  
17,79.293,rs6504626,-0.253  
17,79.296,rs4794078,-0.269  
17,79.302,rs4794080,-0.282  
17,79.310,rs1058564,-0.275  
17,79.339,rs890397,-0.254  
17,79.343,rs6504631,-0.254  
17,79.377,rs3809762,-0.255  
17,79.404,rs4794103,-0.270  
17,79.405,rs12453363,-0.270  
17,79.416,rs2586471,-0.298  
17,79.451,rs2586431,-0.270  
17,79.472,rs1881138,-0.233  
17,79.475,rs4793645,-0.225  
17,79.484,rs1918733,-0.197  
17,79.492,rs7225245,-0.187  
17,79.501,rs2526535,-0.188  
17,79.532,rs16948970,-0.188  
17,79.560,rs9903959,-0.188  
17,79.617,rs9890721,-0.184  
17,79.627,rs1122634,-0.177  
17,79.638,rs198538,-0.171  
17,79.652,rs12936750,-0.180  
17,79.662,rs9890089,-0.200  
17,79.674,rs757420,-0.224  
17,79.681,rs1541392,-0.208  
17,79.684,rs4794173,-0.197  
17,79.689,rs4148412,-0.194  
17,79.710,rs9455,-0.170  
17,79.731,rs9911873,-0.159  
17,79.759,rs17564605,-0.149  
17,79.808,rs7221352,-0.203  
17,79.834,rs8066630,-0.195  
17,79.837,rs758634,-0.197  
17,79.874,rs9899816,-0.216  
17,79.882,rs11657251,-0.218  
17,79.893,rs9915100,-0.224  
17,79.961,rs2215290,-0.257  
17,79.969,rs2041296,-0.258  
17,79.970,rs2318785,-0.258  
17,80.067,rs11655149,-0.252  
17,80.111,rs6504721,-0.224  
17,80.123,rs7211270,-0.224  
17,80.132,rs1015759,-0.222  
17,80.144,rs4794255,-0.225  
17,80.177,rs9635758,-0.228  
17,80.181,rs7226040,-0.226  
17,80.241,rs16950253,-0.277  
17,80.251,rs4794295,-0.278  
17,80.269,rs1263963,-0.277  
17,80.290,rs1269480,-0.277  
17,80.311,rs2319453,-0.272  
17,80.323,rs9905983,-0.262  
17,80.324,rs1526182,-0.262  
17,80.337,rs9896032,-0.281  
17,80.418,rs4141125,-0.267  
17,80.425,rs203049,-0.266  
17,80.696,rs1531993,-0.285  
17,80.761,rs16951211,-0.277  
17,80.784,rs973633,-0.272  
17,81.216,rs1492233,-0.241

17,81.643,rs9902479,-0.239  
17,82.031,rs7217886,-0.232  
17,82.154,rs11870108,-0.264  
17,82.261,rs8064571,-0.291  
17,82.513,rs9898180,-0.322  
17,82.861,rs8073783,-0.296  
17,83.512,rs8070506,-0.212  
17,83.814,rs7225060,-0.184  
17,84.019,rs9898755,-0.177  
17,84.082,rs1508960,-0.175  
17,84.172,rs4347670,-0.177  
17,84.681,rs9894902,-0.184  
17,85.133,rs1457354,-0.203  
17,85.299,rs1870115,-0.214  
17,85.309,rs2045418,-0.241  
17,85.398,rs982755,-0.247  
17,85.661,rs2157768,-0.277  
17,85.978,rs1508010,-0.313  
17,86.311,rs7221015,-0.367  
17,86.670,rs12150099,-0.328  
17,86.677,rs11871253,-0.327  
17,86.708,rs1835220,-0.330  
17,87.009,rs1025905,-0.355  
17,87.089,rs1561977,-0.362  
17,87.166,rs6504928,-0.359  
17,87.202,rs9303355,-0.353  
17,87.360,rs6504933,-0.325  
17,87.378,rs2958875,-0.322  
17,87.419,rs7222848,-0.311  
17,87.430,rs9303359,-0.305  
17,87.440,rs2934894,-0.293  
17,87.447,rs2332308,-0.285  
17,87.483,rs7210248,-0.261  
17,87.487,rs8079105,-0.262  
17,87.492,rs16955329,-0.257  
17,87.550,rs8069447,-0.210  
17,87.743,rs7219986,-0.200  
17,87.745,rs244332,-0.200  
17,87.760,rs7225218,-0.149  
17,87.766,rs2214979,-0.138  
17,87.794,rs4239191,-0.122  
17,87.799,rs8068991,-0.129  
17,87.807,rs4794558,-0.141  
17,87.817,rs9911895,-0.121  
17,87.858,rs4794565,-0.100  
17,87.881,rs9911896,-0.092  
17,87.911,rs2286806,-0.080  
17,87.937,rs4794588,-0.097  
17,87.939,rs8079205,-0.099  
17,87.971,rs9908046,-0.084  
17,87.993,rs6504970,-0.088  
17,87.998,rs12603570,-0.094  
17,88.015,rs4239198,-0.115  
17,88.118,rs1549519,-0.100  
17,88.158,rs8079703,-0.086  
17,88.163,rs4270232,-0.102  
17,88.163,rs9913352,-0.104  
17,88.232,rs9907899,-0.111  
17,88.289,rs9910227,-0.105  
17,88.389,rs8082489,-0.080  
17,88.396,rs11868386,-0.077

17,88.400,rs4794617,-0.075  
17,88.416,rs1431316,-0.071  
17,88.495,rs4794624,-0.060  
17,88.573,rs9896945,-0.045  
17,88.596,rs9903956,-0.045  
17,88.627,rs11079224,-0.043  
17,88.753,rs12450049,-0.029  
17,88.768,rs17760296,-0.026  
17,88.803,rs11079240,-0.021  
17,88.829,rs17820725,-0.016  
17,88.830,rs11654392,-0.016  
17,88.882,rs227738,-0.009  
17,88.883,rs1029723,-0.009  
17,88.891,rs16957691,-0.010  
17,88.904,rs9913235,-0.009  
17,88.917,rs227666,-0.010  
17,88.918,rs227665,-0.010  
17,88.923,rs3914803,-0.010  
17,88.928,rs9913342,-0.010  
17,88.928,rs16957770,-0.010  
17,88.929,rs12150403,-0.009  
17,88.930,rs12950658,-0.009  
17,88.933,rs2049063,-0.009  
17,88.940,rs963292,-0.004  
17,89.025,rs4556852,-0.005  
17,89.034,rs11540270,-0.006  
17,89.037,rs2525997,-0.006  
17,89.043,rs205498,-0.006  
17,89.074,rs2240215,-0.006  
17,89.122,rs8072896,-0.021  
17,89.131,rs11651374,-0.022  
17,89.144,rs6503785,-0.020  
17,89.147,rs7219661,-0.022  
17,89.153,rs3213728,-0.017  
17,89.198,rs3785484,-0.028  
17,89.213,rs1007462,-0.028  
17,89.234,rs9907841,-0.035  
17,89.246,rs11079282,-0.037  
17,89.278,rs9901454,-0.034  
17,89.292,rs7222429,-0.033  
17,89.320,rs7223919,-0.024  
17,89.321,rs6503802,-0.024  
17,89.329,rs12944955,-0.024  
17,89.415,rs8075882,-0.014  
17,89.437,rs11868362,-0.016  
17,89.441,rs12951291,-0.015  
17,89.443,rs2197252,-0.015  
17,89.447,rs11659021,-0.009  
17,89.456,rs11657292,-0.010  
17,89.463,rs9915128,-0.004  
17,89.484,rs277070,0.000  
17,89.490,rs2332933,0.001  
17,89.500,rs2111016,0.011  
17,89.507,rs4793859,0.028  
17,89.510,rs1024819,0.058  
17,89.523,rs9915530,0.093  
17,89.527,rs9898481,0.101  
17,89.538,rs8076384,0.105  
17,89.543,rs9910424,0.107  
17,89.545,rs12453873,0.110  
17,89.555,rs4793567,0.136

17,89.558,rs4793569,0.146  
17,89.567,rs7211655,0.172  
17,89.572,rs9912353,0.171  
17,89.587,rs2586077,0.174  
17,89.610,rs8080016,0.166  
17,89.613,rs4793576,0.167  
17,89.626,rs17762374,0.168  
17,89.641,rs2585833,0.193  
17,89.712,rs16942685,0.161  
17,89.718,rs181241,0.158  
17,89.735,rs1468574,0.139  
17,89.745,rs917606,0.150  
17,89.756,rs3826300,0.162  
17,89.805,rs2526378,0.150  
17,89.814,rs757485,0.148  
17,89.937,rs368243,0.165  
17,91.003,rs3744383,0.141  
17,91.167,rs10853010,0.138  
17,91.254,rs764424,0.152  
17,91.301,rs6503919,0.149  
17,91.818,rs1292034,0.165  
17,91.997,rs3744375,0.179  
17,92.545,rs11652788,0.184  
17,92.983,rs6504016,0.202  
17,93.068,rs3826417,0.191  
17,93.071,rs11871179,0.194  
17,93.091,rs1157995,0.187  
17,93.110,rs7223292,0.147  
17,93.116,rs3785859,0.139  
17,93.140,rs3785848,0.135  
17,93.142,rs4968431,0.135  
17,93.150,rs9907597,0.154  
17,93.187,rs9905140,0.155  
17,93.199,rs7219870,0.166  
17,93.202,rs740752,0.169  
17,93.217,rs7214481,0.168  
17,93.221,rs17601584,0.215  
17,93.227,rs744651,0.180  
17,93.232,rs4968435,0.167  
17,93.233,rs4968568,0.166  
17,93.266,rs7406786,0.162  
17,93.273,rs2378871,0.160  
17,93.296,rs2188728,0.136  
17,93.327,rs7222964,0.124  
17,93.332,rs1858990,0.124  
17,93.456,rs2048718,0.129  
17,93.570,rs10512493,0.128  
17,93.612,rs3750154,0.130  
17,93.780,rs10512496,0.162  
17,93.874,rs2252814,0.178  
17,94.026,rs11867290,0.243  
17,94.036,rs11870240,0.245  
17,94.056,rs4380108,0.245  
17,94.528,rs2440139,0.227  
17,94.820,rs4968647,0.209  
17,94.866,rs4343,0.203  
17,95.691,rs2003549,0.095  
17,95.718,rs2058194,0.093  
17,95.769,rs11079516,0.091  
17,95.786,rs3760239,0.091  
17,95.937,rs1985961,0.097

17,96.038,rs11869535,0.092  
17,96.333,rs12940265,0.086  
17,96.531,rs17564408,0.072  
17,96.807,rs1991401,0.054  
17,97.200,rs6504249,0.041  
17,97.698,rs4791250,0.045  
17,97.829,rs7218921,0.039  
17,97.856,rs8076603,0.039  
17,97.876,rs1808918,0.039  
17,97.890,rs4791235,0.040  
17,97.950,rs938299,0.047  
17,98.200,rs11079563,0.031  
17,98.427,rs4563070,0.022  
17,98.480,rs9892932,0.037  
17,98.562,rs3923086,0.025  
17,98.690,rs2107654,0.004  
17,98.785,rs232141,0.003  
17,98.853,rs9901736,0.001  
17,98.866,rs7210851,0.001  
17,99.031,rs9894277,0.000  
17,99.072,rs2318872,0.000  
17,99.471,rs9904627,-0.000  
17,99.480,rs874618,-0.000  
17,99.676,rs9901804,-0.000  
17,99.717,rs12450534,-0.000  
17,99.730,rs11654719,-0.000  
17,99.794,rs8069022,-0.001  
17,99.838,rs16959227,-0.001  
17,100.000,rs7218480,-0.002  
17,100.103,rs8080721,-0.000  
17,100.166,rs16960009,-0.001  
17,100.172,rs1010546,-0.001  
17,100.218,rs8081512,-0.002  
17,100.248,rs11079667,-0.002  
17,100.278,rs4303580,-0.000  
17,100.377,rs11656099,0.002  
17,100.402,rs8464,0.004  
17,100.412,rs12603061,0.004  
17,100.453,rs1476813,0.007  
17,100.497,rs3848413,0.008  
17,100.529,rs1002327,0.009  
17,100.570,rs1995695,0.006  
17,100.591,rs17644943,0.005  
17,100.654,rs1395826,0.003  
17,100.710,rs740559,0.001  
17,100.736,rs9892619,0.001  
17,100.788,rs3785581,0.000  
17,100.826,rs11650741,-0.000  
17,100.996,rs6504487,-0.000  
17,101.213,rs7214718,-0.002  
17,101.342,rs8066176,-0.003  
17,101.382,rs9903804,-0.003  
17,101.460,rs12939848,-0.000  
17,101.515,rs9902423,0.004  
17,101.547,rs4293416,0.004  
17,101.558,rs4791296,0.004  
17,101.586,rs2364980,0.002  
17,101.600,rs2364979,0.002  
17,101.634,rs7217437,0.004  
17,101.679,rs1808693,0.000  
17,101.683,rs1368582,0.000

17,101.843,rs11079697,-0.006  
17,101.897,rs2570054,-0.008  
17,101.992,rs11658071,-0.001  
17,102.041,rs2537830,-0.002  
17,102.053,rs12325881,-0.003  
17,102.093,rs7223697,-0.003  
17,102.247,rs12453460,-0.007  
17,102.310,rs1542610,-0.010  
17,102.502,rs8065171,-0.015  
17,102.960,rs7502707,-0.018  
17,103.327,rs8064607,-0.001  
17,103.344,rs8077384,-0.001  
17,103.353,rs4558468,-0.001  
17,103.501,rs3760269,-0.001  
17,103.519,rs2072268,-0.002  
17,103.529,rs758152,-0.002  
17,103.534,rs9890694,-0.000  
17,103.539,rs11657610,-0.001  
17,103.561,rs8075800,-0.004  
17,103.596,rs1558878,-0.004  
17,103.612,rs16972915,-0.007  
17,103.625,rs7224186,-0.009  
17,103.635,rs2160725,-0.011  
17,103.744,rs7350947,-0.010  
17,103.757,rs4968897,-0.009  
17,103.825,rs8068202,-0.005  
17,103.914,rs4968906,-0.006  
17,103.956,rs4968810,-0.010  
17,103.982,rs2278445,-0.016  
17,103.983,rs9906395,-0.009  
17,104.002,rs4968816,-0.010  
17,104.025,rs4968932,-0.011  
17,104.034,rs4246425,-0.008  
17,104.051,rs4368217,-0.007  
17,104.107,rs1348372,-0.004  
17,104.135,rs9901473,-0.003  
17,104.157,rs1470291,-0.003  
17,104.185,rs9893368,-0.003  
17,104.198,rs17682084,-0.002  
17,104.388,rs11650611,0.001  
17,104.495,rs11077922,0.000  
17,104.735,rs6501291,0.003  
17,104.815,rs536009,0.003  
17,104.867,rs17686852,0.003  
17,105.019,rs8071378,0.000  
17,105.068,rs1972933,-0.000  
17,105.095,rs2586543,-0.001  
17,105.098,rs2440134,-0.001  
17,105.101,rs6501328,-0.000  
17,105.104,rs2716227,-0.000  
17,105.112,rs9895446,-0.000  
17,105.157,rs2521348,-0.000  
17,105.197,rs11869376,-0.001  
17,105.242,rs9916229,-0.002  
17,105.275,rs16974218,-0.002  
17,105.648,rs16974415,-0.001  
17,105.656,rs1029413,-0.001  
17,105.727,rs9899925,-0.004  
17,105.850,rs12948136,-0.007  
17,105.856,rs7214067,-0.007  
17,105.903,rs6501358,-0.005

17,106.230,rs2215006,-0.004  
17,106.241,rs8079702,-0.006  
17,106.257,rs1468473,-0.005  
17,106.278,rs236528,-0.001  
17,106.416,rs312729,-0.003  
17,106.496,rs3848451,-0.006  
17,107.057,rs9899840,-0.007  
17,107.421,rs10512540,-0.001  
17,107.628,rs1431454,-0.000  
17,108.048,rs7220635,-0.000  
17,108.073,rs7214537,-0.000  
17,108.202,rs2041265,0.000  
17,108.205,rs17763811,0.000  
17,108.458,rs9907787,0.000  
17,108.465,rs16976207,0.000  
17,108.537,rs8069222,-0.000  
17,108.540,rs12952611,-0.000  
17,108.623,rs2190553,-0.000  
17,108.643,rs1015657,-0.000  
17,108.769,rs12936614,-0.003  
17,108.811,rs4793323,-0.005  
17,108.889,rs2190550,-0.000  
17,108.909,rs4793325,-0.001  
17,108.918,rs9889988,-0.002  
17,108.990,rs10512559,-0.009  
17,109.233,rs12452913,-0.009  
17,109.501,rs17824822,-0.009  
17,109.521,rs6501448,-0.009  
17,109.596,rs983085,-0.009  
17,109.680,rs12946942,-0.014  
17,109.761,rs981004,-0.020  
17,109.931,rs12951634,-0.035  
17,109.983,rs969264,-0.040  
17,110.016,rs725545,-0.039  
17,110.121,rs2367391,-0.037  
17,110.537,rs16976696,-0.034  
17,110.548,rs7219970,-0.034  
17,110.566,rs9911758,-0.034  
17,110.923,rs11871027,-0.038  
17,111.268,rs9674884,-0.039  
17,111.507,rs9897758,-0.044  
17,111.560,rs4793360,-0.045  
17,111.575,rs12451845,-0.045  
17,112.121,rs7217175,-0.048  
17,112.559,rs2430514,-0.030  
17,112.900,rs2430549,-0.013  
17,113.252,rs7213040,-0.003  
17,113.314,rs7214582,-0.000  
17,113.465,rs2216167,0.007  
17,113.470,rs12451606,0.008  
17,113.517,rs1861495,0.026  
17,113.554,rs8077886,0.061  
17,113.574,rs8077585,0.080  
17,113.612,rs4793307,0.143  
17,113.630,rs2060095,0.166  
17,113.638,rs1110614,0.175  
17,113.653,rs2713980,0.190  
17,113.667,rs755675,0.201  
17,113.687,rs2060097,0.215  
17,113.819,rs7503865,0.286  
17,113.847,rs4506975,0.308

17,113.887,rs3606,0.328  
17,113.897,rs6501581,0.318  
17,113.903,rs17780885,0.327  
17,113.907,rs8076418,0.323  
17,113.908,rs2466529,0.321  
17,113.947,rs4969040,0.316  
17,113.948,rs2452919,0.316  
17,113.970,rs2466511,0.289  
17,113.996,rs17781029,0.256  
17,114.007,rs8073204,0.247  
17,114.089,rs9916389,0.116  
17,114.095,rs8081534,0.164  
17,114.122,rs2131606,0.220  
17,114.126,rs9910686,0.227  
17,114.132,rs7222812,0.224  
17,114.137,rs8081059,0.222  
17,114.153,rs4969058,0.218  
17,114.161,rs7224603,0.225  
17,114.189,rs12938854,0.250  
17,114.201,rs11656399,0.301  
17,114.220,rs4969011,0.320  
17,114.237,rs10153314,0.306  
17,114.266,rs1037257,0.293  
17,114.420,rs7211297,0.281  
17,114.470,rs3751928,0.275  
17,114.528,rs4969099,0.297  
17,114.603,rs2279730,0.231  
17,114.611,rs2279732,0.260  
17,114.647,rs9914611,0.256  
17,114.670,rs1566295,0.254  
17,114.727,rs6501633,0.223  
17,114.795,rs11077682,0.215  
17,114.808,rs12232541,0.214  
17,114.825,rs4789644,0.214  
17,114.876,rs1872076,0.212  
17,114.930,rs9893375,0.245  
17,114.952,rs7406421,0.252  
17,114.978,rs8075553,0.252  
17,115.084,rs2014209,0.254  
17,115.109,rs12952485,0.220  
17,115.139,rs323406,0.208  
17,115.145,rs12452401,0.200  
17,115.165,rs9903880,0.160  
17,115.177,rs323413,0.152  
17,115.182,rs1552013,0.152  
17,115.189,rs17249698,0.153  
17,115.190,rs2683154,0.153  
17,115.207,rs7214374,0.151  
17,115.220,rs17192023,0.161  
17,115.242,rs2586841,0.164  
17,115.247,rs2586794,0.164  
17,115.257,rs4789011,0.194  
17,115.261,rs4789538,0.193  
17,115.262,rs7406805,0.199  
17,115.276,rs6501667,0.231  
17,115.301,rs16977829,0.237  
17,115.329,rs755803,0.242  
17,115.371,rs8077392,0.278  
17,115.382,rs9902475,0.292  
17,115.383,rs1110195,0.292  
17,115.435,rs6501676,0.311



17,115.574,rs952410,0.287  
17,115.643,rs6501679,0.167  
17,115.681,rs11077722,0.149  
17,115.707,rs7406779,0.134  
17,115.827,rs1007482,0.076  
17,115.861,rs8080915,0.070  
17,116.062,rs4789620,0.063  
17,116.080,rs11655133,0.062  
17,116.218,rs4789626,0.071  
17,116.236,rs7211140,0.063  
17,116.281,rs4789632,0.048  
17,116.481,rs11650353,0.057  
17,116.499,rs1877686,0.057  
17,116.641,rs8082699,0.038  
17,116.666,rs2100896,0.035  
17,116.716,rs2382642,0.021  
17,116.761,rs2382646,0.028  
17,116.781,rs2891034,0.030  
17,116.978,rs1048367,0.029  
17,117.047,rs8070953,0.023  
17,117.170,rs884802,0.013  
17,117.308,rs1699596,0.017  
17,117.486,rs783018,0.013  
17,117.521,rs532544,0.006  
17,117.540,rs8081794,0.006  
17,117.676,rs1037170,0.006  
17,117.785,rs3178300,0.014  
17,117.887,rs10775365,0.010  
17,118.079,rs689730,0.010  
17,118.449,rs8078766,0.019  
17,118.509,rs4789112,0.018  
17,118.524,rs1044433,0.017  
17,119.016,rs9906330,0.014  
17,119.429,rs4789145,0.006  
17,120.725,rs9913538,0.017  
17,120.777,rs1671021,0.008  
17,120.782,rs9910321,0.008  
17,120.825,rs3744000,0.006  
17,120.840,rs820388,0.008  
17,120.845,rs7207208,0.008  
17,121.385,rs11077799,0.014  
17,121.521,rs6501847,0.015  
17,122.168,rs2585738,0.022  
17,122.283,rs1868827,0.022  
17,122.403,rs4505373,0.022  
17,122.707,rs4789267,0.031  
17,122.880,rs346794,0.035  
17,122.939,rs11077813,0.042  
17,123.418,rs11077820,0.019  
17,123.600,rs12948783,0.011  
17,123.852,rs3744050,0.002  
17,123.876,rs2120886,0.002  
17,123.931,rs2304921,0.002  
17,124.093,rs1860351,0.002  
17,124.523,rs11868472,0.005  
17,124.578,rs1014390,0.006  
17,124.678,rs237054,0.006  
17,125.279,rs563079,0.007  
17,125.379,rs644871,0.006  
17,125.661,rs491914,0.001  
17,125.762,rs11077876,0.001

17,125.779,rs736100,0.001  
17,125.792,rs11868104,0.002  
17,125.895,rs4789378,0.013  
17,126.039,rs4289018,0.004  
17,126.176,rs4788961,0.004  
17,126.250,rs9912563,0.009  
17,126.328,rs3848393,0.011  
17,126.506,rs4788966,0.023  
17,126.542,rs9890579,0.026  
17,126.544,rs7209713,0.026  
17,126.598,rs2083774,0.026  
17,126.672,rs12948945,0.018  
17,126.766,rs1318555,0.018  
17,126.940,rs720825,0.006  
17,127.012,rs16969661,0.005  
17,127.079,rs501316,0.005  
17,127.148,rs4788978,0.006  
17,127.277,rs551263,0.007  
17,127.388,rs633672,0.006  
17,127.698,rs8078846,0.004  
17,127.993,rs11656081,0.002  
17,128.084,rs11655883,0.001  
17,128.174,rs2174919,0.001  
17,128.237,rs647861,0.001  
17,128.269,rs2411107,0.001  
17,128.854,rs4789448,0.002  
17,128.914,rs402357,0.003  
17,129.035,rs1078504,0.004  
17,129.060,rs93075,0.004  
17,129.166,rs1077817,0.006  
17,129.383,rs11077909,0.010  
17,129.747,rs312818,0.017  
17,129.870,rs1865740,0.010  
17,129.898,rs4462668,0.009  
17,129.907,rs9900113,0.012  
17,129.925,rs8070652,0.018  
17,129.938,rs16970220,0.016  
17,129.941,rs12947286,0.015  
17,130.000,rs11077916,0.013  
17,130.051,rs11077917,0.014  
17,130.074,rs7214455,0.018  
17,130.077,rs1108759,0.017  
17,130.099,rs4349216,0.010  
17,130.104,rs12949359,0.009  
17,130.111,rs7215957,0.012  
17,130.113,rs7215702,0.011  
17,130.114,rs12452835,0.011  
17,130.226,rs4789484,0.002  
17,130.232,rs16848,0.003  
17,130.314,rs9902073,0.003  
17,130.399,rs7210773,0.003  
17,130.403,rs8064943,0.003  
17,130.419,rs9907505,0.003  
17,130.497,rs2033719,0.002  
17,130.525,rs8075300,0.002  
17,130.570,rs4789490,0.002  
17,130.581,rs2053236,0.002  
17,130.638,rs9894524,0.000  
17,130.668,rs8080480,0.000  
17,130.717,rs735658,0.000  
17,131.140,rs17639398,-0.001

17,131.185,rs4411562,-0.001  
17,131.265,rs12051678,-0.002  
17,131.337,rs9807014,-0.001  
17,131.374,rs3813026,-0.001  
17,131.422,rs7217374,-0.001  
17,131.466,rs2292235,-0.003  
17,131.488,rs12232476,-0.003  
17,131.494,rs2661679,-0.003  
17,131.504,rs9897269,-0.003  
17,131.548,rs8072874,-0.002  
17,131.608,rs11655650,-0.001  
17,131.635,rs9907137,-0.001  
17,131.655,rs7211218,-0.000  
17,131.683,rs1109278,0.000  
17,131.696,rs8064645,0.000  
17,131.722,rs6501186,-0.000  
17,131.729,rs749885,-0.000  
17,131.744,rs12602395,-0.001  
17,131.830,rs9904782,-0.004  
17,131.863,rs4789577,-0.007  
17,131.878,rs7222391,-0.007  
17,131.890,rs7221341,-0.007  
17,132.040,rs17561950,-0.000  
17,132.154,rs632058,0.001  
17,132.157,rs11649879,0.000  
17,132.197,rs2289754,-0.000  
17,132.240,rs7405830,-0.001  
17,132.279,rs11077372,-0.003  
17,132.304,rs930572,-0.004  
17,132.325,rs1867475,-0.005  
17,132.333,rs12600766,-0.005  
17,132.361,rs642612,-0.005  
17,132.411,rs4969151,-0.005  
17,132.447,rs11867901,-0.003  
17,132.454,rs1108367,-0.002  
17,132.468,rs9302881,-0.004  
17,132.502,rs7222201,-0.006  
17,132.503,rs9890266,-0.006  
17,132.551,rs4969205,-0.000  
17,132.585,rs12953053,-0.000  
17,132.589,rs9889754,-0.000  
17,132.590,rs4796808,-0.000  
17,133.006,rs12944556,-0.000  
17,133.078,rs1110274,-0.000  
17,133.222,rs9900972,0.000  
17,133.230,rs7218237,0.000  
17,133.285,rs3744787,0.000  
17,133.295,rs4789936,-0.000  
17,133.398,rs7216022,-0.002  
17,133.399,rs4789921,-0.002  
17,133.474,rs11077405,-0.002  
17,133.661,rs3803780,-0.001  
17,133.787,rs7212486,-0.001  
17,133.855,rs2007979,-0.000  
17,133.888,rs7214618,-0.000  
17,133.899,rs7211056,-0.000  
17,133.909,rs1675273,0.000  
17,133.910,rs4789950,0.000  
17,134.013,rs2703519,0.009  
17,134.026,rs2703549,0.003  
17,134.054,rs4789956,-0.000

17,134.073,rs2606193,-0.002  
17,134.096,rs17674253,-0.010  
17,134.104,rs12603684,-0.010  
17,134.120,rs4789963,-0.011  
17,134.144,rs11656929,-0.015  
17,134.152,rs12051618,-0.015  
17,134.199,rs12603748,-0.017  
17,134.242,rs9906538,-0.014  
17,134.266,rs11658702,-0.018  
17,134.292,rs4790001,-0.010  
17,134.321,rs11871435,-0.014  
17,134.331,rs12949118,-0.018  
17,134.357,rs12600765,-0.029  
17,134.454,rs4790018,-0.022  
17,134.462,rs7215470,-0.021  
17,134.465,rs4790022,-0.014  
17,134.481,rs4789892,-0.016  
17,134.486,rs4790023,-0.015  
17,134.489,rs7208287,-0.014  
17,134.500,rs7225361,-0.012  
17,134.519,rs7225663,-0.008  
17,134.551,rs2377405,-0.012  
17,134.597,rs8075392,-0.013  
17,134.625,rs2137772,-0.011  
17,134.652,rs7224144,-0.008  
17,134.695,rs871739,-0.009  
17,134.748,rs296143,-0.008  
17,134.885,rs7216806,-0.001  
17,134.901,rs4073995,-0.001  
17,135.330,rs9900295,0.033  
17,135.431,rs8064780,0.044  
17,135.434,rs7217395,0.044  
17,135.526,rs2587507,0.047  
17,135.548,rs9898405,0.048  
17,135.667,rs8078624,0.048  
17,135.691,rs2362396,0.053  
17,135.720,rs8069143,0.062  
17,135.736,rs3843732,0.068  
17,135.783,rs1696784,0.085  
17,135.842,rs1124736,0.082  
17,135.862,rs12451638,0.074  
17,135.873,rs1285293,0.070  
17,135.890,rs7211532,0.061  
17,135.947,rs4441315,0.054  
17,136.005,rs4074023,0.041  
17,136.257,rs2304851,0.049  
17,136.335,rs8077849,0.048  
17,136.444,rs12602462,0.047  
17,136.494,rs8068433,0.055  
17,136.528,rs11652075,0.059  
17,136.543,rs9894254,0.061  
17,136.614,rs6420489,0.070  
17,136.719,rs7219131,0.066  
17,137.005,rs3185057,0.043  
17,137.016,rs8359,0.042  
17,137.143,rs9914610,0.037  
17,137.190,rs4563088,0.025  
17,137.427,rs7209040,0.016  
17,137.773,rs9901366,0.017  
17,137.802,rs12948054,0.018  
17,138.083,rs2672886,0.019

17,138.103,rs2048753,0.019  
17,138.114,rs7221948,0.019  
17,138.178,rs2589158,0.021  
17,138.202,rs2672893,0.024  
17,138.219,rs2672890,0.027  
17,138.256,rs6565484,0.028  
17,138.374,rs9897968,0.011  
17,138.491,rs1062935,0.006  
17,138.572,rs8081168,0.003  
17,138.626,rs7225916,0.001  
17,138.662,rs4969349,0.000  
17,138.715,rs8079626,-0.002  
17,138.738,rs9901648,-0.004  
17,138.760,rs4076037,-0.010  
17,138.877,rs4969391,-0.010  
17,138.919,rs4969254,-0.007  
17,138.952,rs4969259,-0.004  
17,138.988,rs7209950,-0.002  
17,139.022,rs2659046,-0.000  
17,139.138,rs2659029,0.000  
17,139.220,rs6565548,0.001  
17,139.380,rs7212109,-0.000  
17,139.546,rs8073897,-0.000  
17,139.588,rs8070792,-0.000  
17,139.616,rs1701,0.000  
17,139.831,rs7406505,0.001  
17,139.855,rs8079717,0.001  
17,139.903,rs7211870,0.001  
17,140.185,rs9894429,0.002  
17,140.253,rs3830068,0.003  
17,140.445,rs9319620,0.005  
17,140.723,rs2070871,0.001  
17,141.208,rs4969481,0.000  
17,141.238,rs6502048,0.000  
17,141.246,rs9915228,0.000  
17,141.446,rs11077969,0.000  
17,141.764,rs11653735,0.002  
17,141.807,rs4789846,0.002  
17,141.971,rs4789763,0.003  
17,142.008,rs8081117,0.003  
17,142.188,rs8072110,0.002  
17,142.403,rs7221018,0.001  
17,142.466,rs9894993,0.005  
17,142.667,rs3794716,0.003  
17,142.755,rs4789814,0.001  
17,142.806,rs2011631,0.003  
17,142.844,rs9912932,0.005  
17,143.181,rs868203,0.006  
17,143.222,rs2677919,0.006  
17,143.512,rs3785512,0.015  
17,143.638,rs1551628,0.019  
17,143.781,rs7405957,0.025  
17,143.870,rs11652770,0.025  
17,143.911,rs6502043,0.025  
18,0.024,rs652504,-0.076  
18,0.062,rs7239756,-0.076  
18,0.094,rs8088001,-0.076  
18,0.126,rs596551,-0.077  
18,0.223,rs505110,-0.101  
18,0.226,rs18485,-0.102  
18,0.229,rs11081025,-0.104

18,0.260,rs7236553,-0.103  
18,0.280,rs8086522,-0.102  
18,0.307,rs1296194,-0.114  
18,0.313,rs618671,-0.119  
18,0.331,rs3929952,-0.124  
18,0.371,rs9959369,-0.141  
18,0.448,rs4798145,-0.144  
18,0.488,rs2621178,-0.141  
18,0.498,rs2621201,-0.140  
18,0.557,rs12962668,-0.135  
18,0.648,rs2846662,-0.154  
18,0.697,rs1564419,-0.175  
18,0.735,rs959015,-0.168  
18,0.796,rs7235748,-0.158  
18,0.873,rs7244087,-0.143  
18,0.921,rs12959798,-0.110  
18,0.977,rs514253,-0.090  
18,1.038,rs16947340,-0.078  
18,1.044,rs505171,-0.077  
18,1.048,rs527383,-0.096  
18,1.052,rs4798418,-0.088  
18,1.053,rs9947236,-0.088  
18,1.053,rs2219281,-0.105  
18,1.059,rs11660343,-0.105  
18,1.081,rs483655,-0.105  
18,1.104,rs518471,-0.103  
18,1.144,rs1004961,-0.102  
18,1.205,rs505140,-0.115  
18,1.274,rs485562,-0.095  
18,1.308,rs13381189,-0.096  
18,1.393,rs13381806,-0.111  
18,1.426,rs9966612,-0.107  
18,1.458,rs2244500,-0.095  
18,1.531,rs2847154,-0.092  
18,1.592,rs9952691,-0.088  
18,1.749,rs8093865,-0.071  
18,1.900,rs10468774,-0.027  
18,1.967,rs7244120,-0.015  
18,1.980,rs1291183,-0.009  
18,1.997,rs1544241,-0.007  
18,2.093,rs4797325,-0.002  
18,2.101,rs2040176,-0.002  
18,2.124,rs17500692,-0.001  
18,2.151,rs1610037,-0.002  
18,2.283,rs8090931,-0.022  
18,2.307,rs9964808,-0.026  
18,2.422,rs789071,-0.022  
18,2.434,rs1523398,-0.022  
18,2.447,rs7232873,-0.022  
18,2.527,rs1022177,-0.023  
18,2.541,rs12953819,-0.023  
18,2.582,rs9951158,-0.023  
18,2.658,rs304398,-0.018  
18,2.946,rs9954959,-0.016  
18,3.001,rs12709528,-0.014  
18,3.752,rs1395956,-0.008  
18,3.851,rs1941669,-0.006  
18,3.946,rs1941663,-0.004  
18,4.000,rs2193727,-0.007  
18,4.362,rs2219122,-0.006  
18,4.448,rs1563188,-0.006

18,4.491,rs2028327,-0.006  
18,4.555,rs4600536,-0.003  
18,4.614,rs10853266,-0.001  
18,4.627,rs1439420,-0.001  
18,4.934,rs313038,-0.001  
18,4.957,rs1397060,-0.000  
18,4.968,rs12607691,-0.001  
18,5.000,rs4797949,-0.003  
18,5.069,rs9966123,-0.002  
18,5.175,rs1009238,0.000  
18,5.270,rs9959376,-0.005  
18,5.275,rs9956834,-0.003  
18,5.277,rs10468721,-0.003  
18,5.408,rs473110,-0.001  
18,5.437,rs7229380,-0.001  
18,5.482,rs9949777,-0.002  
18,5.573,rs8089407,0.000  
18,5.623,rs668679,0.001  
18,5.642,rs11659972,0.002  
18,5.734,rs513990,0.001  
18,5.767,rs8082981,0.001  
18,5.840,rs670003,0.004  
18,5.955,rs642237,0.002  
18,6.040,rs16943056,0.003  
18,6.081,rs9303900,0.002  
18,6.106,rs8086975,0.002  
18,6.174,rs16943104,0.009  
18,6.316,rs8094785,0.010  
18,6.446,rs3914786,0.013  
18,6.466,rs8096586,0.013  
18,6.475,rs3914792,0.014  
18,6.541,rs2347267,0.018  
18,6.660,rs770238,0.030  
18,6.737,rs16943442,0.024  
18,6.827,rs12953815,0.019  
18,6.838,rs8093338,0.018  
18,6.964,rs7237881,0.004  
18,7.030,rs611187,0.003  
18,7.256,rs8092725,0.002  
18,7.479,rs10163754,0.006  
18,7.520,rs11664521,0.007  
18,7.550,rs1893152,0.007  
18,7.667,rs679153,0.017  
18,7.680,rs16943929,0.017  
18,7.697,rs7226712,0.017  
18,7.724,rs8097282,0.019  
18,7.810,rs3826638,0.018  
18,7.814,rs16943989,0.017  
18,7.850,rs11080994,0.012  
18,7.859,rs16944003,0.009  
18,7.962,rs3745013,0.001  
18,7.975,rs1164,0.001  
18,8.278,rs1539791,0.001  
18,8.454,rs661767,0.000  
18,8.530,rs678156,0.001  
18,8.626,rs4798055,0.001  
18,8.770,rs4414562,0.002  
18,8.901,rs2230164,0.005  
18,8.949,rs8098020,0.005  
18,9.023,rs7506674,0.007  
18,9.039,rs6506070,0.006

18,9.094,rs9951849,0.005  
18,9.116,rs10853291,0.005  
18,9.152,rs11872867,0.005  
18,9.164,rs4340411,0.006  
18,9.211,rs7227251,0.004  
18,9.245,rs717183,0.001  
18,9.277,rs2034069,0.001  
18,9.359,rs12961250,0.002  
18,9.377,rs1662304,0.002  
18,9.386,rs1662807,0.001  
18,9.450,rs8092567,-0.001  
18,9.473,rs2028636,-0.002  
18,9.494,rs4798089,-0.002  
18,9.496,rs9954608,-0.002  
18,9.546,rs12457997,-0.001  
18,9.567,rs1020301,-0.000  
18,9.606,rs238135,-0.000  
18,9.611,rs238533,-0.000  
18,9.624,rs7229123,0.000  
18,9.682,rs238120,0.000  
18,9.690,rs11664141,0.000  
18,9.692,rs10513868,0.000  
18,9.693,rs238113,0.000  
18,9.715,rs3786455,0.002  
18,9.733,rs510668,0.005  
18,9.735,rs477347,0.005  
18,9.749,rs16945001,0.005  
18,9.939,rs7232859,0.010  
18,9.982,rs16945066,0.011  
18,10.071,rs3888225,0.008  
18,10.125,rs1787846,0.006  
18,10.149,rs3866988,0.006  
18,10.156,rs17725070,0.011  
18,10.170,rs16945135,0.010  
18,10.212,rs2290871,0.007  
18,10.267,rs7230740,0.005  
18,10.468,rs414273,0.006  
18,10.504,rs8097308,0.006  
18,10.651,rs4798110,0.008  
18,10.690,rs7235163,0.006  
18,10.771,rs11873533,0.007  
18,10.796,rs3786446,0.009  
18,10.797,rs11659558,0.009  
18,10.892,rs3959690,0.011  
18,10.979,rs8096244,0.012  
18,10.992,rs4798131,0.012  
18,11.157,rs9961715,0.013  
18,11.273,rs3915772,0.013  
18,11.338,rs7244051,0.014  
18,11.360,rs9963685,0.016  
18,11.443,rs4798141,0.024  
18,11.561,rs1442366,0.037  
18,11.575,rs4798147,0.039  
18,11.713,rs1465947,0.046  
18,11.741,rs11664384,0.045  
18,11.791,rs9966360,0.042  
18,11.800,rs7228506,0.043  
18,11.877,rs1372631,0.067  
18,11.939,rs2872873,0.074  
18,11.963,rs1442373,0.058  
18,11.969,rs1442378,0.057



18,12.051,rs11661443,0.058  
18,12.251,rs1040277,0.050  
18,12.416,rs1607970,0.042  
18,12.426,rs7239719,0.038  
18,12.558,rs12455349,0.012  
18,12.566,rs628229,0.012  
18,12.901,rs4550556,0.011  
18,12.961,rs4624288,0.002  
18,12.980,rs9967269,0.013  
18,13.087,rs8085726,0.024  
18,13.197,rs12963270,0.028  
18,13.223,rs12968150,0.026  
18,13.405,rs11081119,0.027  
18,13.411,rs280976,0.027  
18,13.481,rs1979943,0.027  
18,13.649,rs4798233,0.024  
18,13.720,rs1701506,0.020  
18,13.804,rs8098335,0.012  
18,13.885,rs7231700,0.009  
18,14.038,rs2847108,0.014  
18,14.057,rs8096913,0.015  
18,14.199,rs1658191,0.011  
18,14.214,rs2186884,0.011  
18,14.317,rs9954107,0.008  
18,14.606,rs8096374,0.000  
18,14.634,rs8096497,-0.000  
18,14.637,rs11081148,0.002  
18,14.720,rs6506251,0.007  
18,14.779,rs10438879,0.008  
18,15.086,rs4798261,0.011  
18,15.258,rs1587543,0.018  
18,15.286,rs1466882,0.018  
18,15.316,rs8085931,0.020  
18,15.616,rs188357,0.047  
18,15.623,rs4455065,0.048  
18,15.697,rs292367,0.064  
18,15.835,rs12964135,0.067  
18,15.864,rs599322,0.068  
18,15.892,rs9961211,0.066  
18,15.900,rs397175,0.065  
18,16.011,rs11875045,0.067  
18,16.157,rs7244505,0.057  
18,16.496,rs1109434,0.061  
18,16.515,rs12953610,0.059  
18,16.586,rs629258,0.058  
18,16.674,rs603313,0.066  
18,16.714,rs11665528,0.072  
18,16.794,rs11081186,0.053  
18,16.811,rs4798341,0.048  
18,16.822,rs7236529,0.062  
18,16.838,rs4387679,0.062  
18,16.865,rs17466502,0.069  
18,16.877,rs7237323,0.073  
18,16.893,rs12458297,0.079  
18,16.900,rs10775435,0.080  
18,16.916,rs9965051,0.088  
18,16.982,rs8091944,0.087  
18,16.985,rs8090286,0.086  
18,16.993,rs12458743,0.088  
18,17.035,rs1785382,0.101  
18,17.171,rs11660230,0.088

18,17.205,rs1940995,0.104  
18,17.274,rs4797219,0.105  
18,17.300,rs8090662,0.106  
18,17.453,rs9635816,0.111  
18,17.526,rs4798405,0.112  
18,17.561,rs1917917,0.113  
18,17.690,rs11877277,0.104  
18,17.843,rs8093690,0.153  
18,17.969,rs6506343,0.179  
18,18.111,rs9948128,0.155  
18,18.219,rs11876129,0.157  
18,18.338,rs724676,0.153  
18,18.370,rs635546,0.138  
18,18.379,rs736632,0.142  
18,18.425,rs571298,0.122  
18,18.436,rs948229,0.113  
18,18.438,rs549827,0.112  
18,18.460,rs11661271,0.130  
18,18.481,rs4644934,0.102  
18,18.518,rs7239905,0.097  
18,18.606,rs4798428,0.083  
18,18.619,rs12457334,0.084  
18,18.703,rs607840,0.099  
18,18.768,rs1785234,0.108  
18,19.231,rs7228441,0.086  
18,19.776,rs408299,0.057  
18,19.788,rs636589,0.057  
18,20.320,rs341201,0.043  
18,20.512,rs882838,0.046  
18,20.550,rs1426333,0.046  
18,20.752,rs9963268,0.052  
18,20.799,rs12458804,0.114  
18,20.893,rs4798452,0.111  
18,20.918,rs12967361,0.107  
18,21.062,rs1941500,0.098  
18,21.142,rs8096595,0.086  
18,21.257,rs12326052,0.061  
18,21.328,rs1941491,0.053  
18,21.368,rs12607650,0.043  
18,21.433,rs1941509,0.032  
18,21.460,rs11663318,0.024  
18,21.600,rs1941492,0.017  
18,21.604,rs9947929,0.017  
18,21.905,rs7506974,0.016  
18,22.083,rs9965330,0.025  
18,22.437,rs1431385,0.051  
18,22.437,rs8095228,0.051  
18,22.604,rs1241983,0.121  
18,22.674,rs1116757,0.134  
18,22.921,rs530612,0.143  
18,22.958,rs17439137,0.145  
18,22.987,rs509497,0.166  
18,23.089,rs541770,0.133  
18,23.102,rs568176,0.129  
18,23.163,rs4239330,0.097  
18,23.187,rs693754,0.085  
18,23.352,rs600695,0.067  
18,23.387,rs648161,0.048  
18,23.565,rs16951199,0.037  
18,23.587,rs2065551,0.037  
18,23.607,rs1466421,0.040

18,23.610,rs10853343,0.066  
18,23.633,rs2045781,0.075  
18,23.669,rs12955222,0.091  
18,23.725,rs984355,0.076  
18,23.962,rs450015,0.074  
18,23.998,rs406756,0.062  
18,24.075,rs7231458,0.056  
18,24.094,rs12966305,0.059  
18,24.234,rs965992,0.087  
18,24.361,rs4797283,0.112  
18,24.459,rs883105,0.130  
18,24.910,rs4798561,0.245  
18,24.954,rs12966566,0.236  
18,24.989,rs9962232,0.209  
18,25.006,rs16951664,0.202  
18,25.369,rs555107,0.177  
18,25.371,rs497065,0.178  
18,25.413,rs12605481,0.171  
18,25.509,rs956551,0.154  
18,25.675,rs1941137,0.155  
18,25.879,rs8099410,0.123  
18,25.904,rs661059,0.104  
18,25.905,rs7236946,0.086  
18,25.909,rs7236295,0.121  
18,26.066,rs607396,0.124  
18,26.078,rs1374104,0.122  
18,26.303,rs1992373,0.095  
18,26.317,rs1443604,0.111  
18,26.318,rs16952588,0.111  
18,26.462,rs12960805,0.125  
18,26.816,rs567595,0.099  
18,26.817,rs1468707,0.099  
18,26.901,rs1942956,0.091  
18,26.923,rs3794959,0.091  
18,27.203,rs4399595,0.097  
18,27.309,rs7505928,0.101  
18,27.320,rs6506569,0.102  
18,27.379,rs16953216,0.109  
18,27.384,rs10163905,0.108  
18,27.469,rs12456630,0.087  
18,27.508,rs2005039,0.097  
18,27.516,rs686693,0.100  
18,27.531,rs8094662,0.100  
18,27.640,rs635269,0.071  
18,27.684,rs675417,0.086  
18,27.731,rs17493589,0.089  
18,27.770,rs658069,0.097  
18,27.792,rs12964134,0.103  
18,27.795,rs4798645,0.103  
18,27.864,rs12457756,0.085  
18,27.907,rs2156472,0.077  
18,27.989,rs11876268,0.111  
18,27.994,rs9955691,0.133  
18,28.012,rs12455669,0.132  
18,28.036,rs17582975,0.131  
18,28.058,rs4505407,0.129  
18,28.214,rs321663,0.132  
18,28.285,rs422303,0.115  
18,28.291,rs400839,0.114  
18,28.376,rs10502379,0.103  
18,28.456,rs1249489,0.087

18,28.466,rs1249488,0.119  
18,28.542,rs693405,0.116  
18,28.701,rs484913,0.062  
18,28.747,rs9807413,0.057  
18,28.806,rs656602,0.051  
18,28.816,rs16954333,0.051  
18,28.826,rs595802,0.050  
18,28.854,rs12962546,0.048  
18,28.875,rs10502382,0.049  
18,28.911,rs690336,0.049  
18,28.983,rs7236228,0.044  
18,29.049,rs631729,0.038  
18,29.173,rs4798720,0.029  
18,29.195,rs11663850,0.028  
18,29.220,rs12956492,0.026  
18,29.310,rs4798736,0.021  
18,29.334,rs8095138,0.017  
18,29.363,rs4798750,0.015  
18,29.462,rs12965084,0.025  
18,29.499,rs9951585,0.024  
18,30.300,rs2864527,0.007  
18,30.335,rs9963940,0.007  
18,30.521,rs12455836,0.006  
18,30.582,rs7245034,0.006  
18,30.723,rs4798812,0.009  
18,31.018,rs1813100,0.010  
18,31.057,rs10853380,0.010  
18,31.165,rs7245068,0.010  
18,31.370,rs11872991,0.008  
18,31.425,rs7244365,0.009  
18,31.506,rs8083190,0.008  
18,31.596,rs613536,0.011  
18,31.616,rs930841,0.012  
18,31.707,rs9963622,0.019  
18,31.715,rs7238992,0.020  
18,31.756,rs16955490,0.021  
18,31.758,rs921835,0.021  
18,31.770,rs11659898,0.020  
18,31.786,rs4798850,0.016  
18,31.811,rs9304044,0.012  
18,31.818,rs9951109,0.012  
18,31.876,rs9962736,0.022  
18,31.934,rs16955629,0.013  
18,31.983,rs8082842,0.012  
18,32.160,rs9304048,0.021  
18,32.166,rs661556,0.021  
18,32.289,rs492369,0.019  
18,32.420,rs7237794,0.017  
18,32.475,rs29063,0.016  
18,32.552,rs4239278,0.016  
18,32.574,rs29029,0.016  
18,32.734,rs610573,0.015  
18,32.874,rs1292299,0.012  
18,32.931,rs4797398,0.009  
18,32.957,rs653360,0.012  
18,33.040,rs2868929,0.026  
18,33.096,rs627953,0.029  
18,33.139,rs9957931,0.033  
18,33.141,rs11080389,0.033  
18,33.177,rs9949713,0.035  
18,33.212,rs8093795,0.033

18,33.234,rs9955237,0.034  
18,33.275,rs576084,0.028  
18,33.388,rs4797414,0.030  
18,33.402,rs12954327,0.020  
18,33.625,rs4796877,0.016  
18,33.633,rs8098645,0.013  
18,33.720,rs206491,0.005  
18,33.782,rs169570,0.005  
18,33.792,rs11080402,0.006  
18,33.820,rs206631,0.011  
18,33.833,rs4797430,0.011  
18,33.861,rs9949204,0.012  
18,33.878,rs206605,0.013  
18,33.918,rs9964529,0.014  
18,33.993,rs206581,0.021  
18,34.083,rs8091927,0.030  
18,34.123,rs206519,0.021  
18,34.144,rs206504,0.016  
18,34.172,rs206503,0.014  
18,34.176,rs206501,0.014  
18,34.201,rs12955584,0.022  
18,34.215,rs9959968,0.023  
18,34.248,rs8095782,0.027  
18,34.333,rs476792,0.044  
18,34.595,rs6505570,0.041  
18,34.601,rs16974882,0.041  
18,34.603,rs484583,0.041  
18,34.628,rs16974966,0.040  
18,34.645,rs475411,0.040  
18,34.958,rs539632,0.042  
18,34.969,rs480802,0.041  
18,34.977,rs655111,0.032  
18,34.999,rs8095590,0.057  
18,35.111,rs4796902,0.045  
18,35.254,rs7233628,0.051  
18,35.442,rs1918672,0.051  
18,35.465,rs1683369,0.056  
18,35.555,rs11875480,0.061  
18,35.822,rs264272,0.062  
18,35.906,rs9952954,0.065  
18,36.065,rs2660283,0.059  
18,36.172,rs11665509,0.047  
18,36.206,rs7235388,0.041  
18,36.241,rs2625381,0.038  
18,36.285,rs2870108,0.044  
18,36.287,rs12455924,0.044  
18,36.364,rs8091121,0.039  
18,36.388,rs2016302,0.038  
18,36.495,rs6505620,0.058  
18,36.592,rs4239294,0.061  
18,36.614,rs4506977,0.062  
18,36.631,rs4629032,0.061  
18,36.656,rs1542836,0.062  
18,36.779,rs4517857,0.052  
18,36.781,rs8097831,0.051  
18,36.830,rs4796915,0.035  
18,36.853,rs1498201,0.030  
18,36.941,rs7230244,0.026  
18,37.046,rs987890,0.036  
18,37.099,rs7243042,0.037  
18,37.163,rs461341,0.036

18,37.273,rs4797529,0.027  
18,37.349,rs11080515,0.016  
18,37.433,rs1893233,0.016  
18,37.794,rs507790,0.008  
18,37.863,rs2155678,0.009  
18,37.866,rs535529,0.009  
18,37.872,rs8099150,0.010  
18,37.883,rs1551900,0.011  
18,37.900,rs16976578,0.001  
18,37.904,rs8096857,0.000  
18,37.906,rs4541146,0.000  
18,37.919,rs12457181,0.000  
18,38.025,rs787554,-0.001  
18,38.057,rs7239624,0.000  
18,38.060,rs662098,0.001  
18,38.066,rs641010,0.002  
18,38.076,rs593713,0.001  
18,38.117,rs871044,0.001  
18,38.198,rs622863,0.002  
18,38.242,rs679246,0.002  
18,38.276,rs647077,0.002  
18,38.302,rs7244678,0.001  
18,38.344,rs1020294,0.000  
18,38.547,rs4519391,-0.000  
18,38.850,rs4796955,0.001  
18,38.953,rs11080567,0.001  
18,39.133,rs16973056,0.001  
18,39.557,rs1592643,0.001  
18,39.577,rs12959199,0.001  
18,39.613,rs2847254,0.001  
18,39.642,rs2542145,0.001  
18,39.685,rs478582,-0.000  
18,39.707,rs9959061,-0.000  
18,39.728,rs8083335,-0.001  
18,39.730,rs9916926,-0.001  
18,39.734,rs12953662,-0.001  
18,39.737,rs12969041,-0.001  
18,39.781,rs11662617,-0.019  
18,39.801,rs4797757,-0.027  
18,39.864,rs6505810,-0.018  
18,39.891,rs12326878,-0.004  
18,39.909,rs10502420,-0.003  
18,39.919,rs4797774,-0.005  
18,39.920,rs3859301,-0.005  
18,39.925,rs7244136,-0.008  
18,39.926,rs8089773,-0.008  
18,39.926,rs8090201,-0.008  
18,39.944,rs1785113,-0.006  
18,39.945,rs12956044,-0.005  
18,39.978,rs11876765,-0.009  
18,39.984,rs1149360,-0.010  
18,39.991,rs1284409,-0.012  
18,39.992,rs1284410,-0.012  
18,40.031,rs6505831,0.000  
18,40.034,rs12605886,0.000  
18,40.073,rs1149356,0.000  
18,40.153,rs9955264,-0.001  
18,40.213,rs7236531,-0.004  
18,40.225,rs948331,-0.004  
18,40.229,rs16941288,-0.003  
18,40.275,rs4797846,-0.001

18,40.297,rs10502426,-0.000  
18,40.328,rs7238647,0.000  
18,40.369,rs2286933,0.000  
18,40.488,rs16973565,-0.000  
18,40.557,rs17705736,-0.000  
18,40.557,rs3927214,-0.000  
18,40.581,rs3971170,-0.001  
18,40.605,rs6505891,-0.004  
18,40.735,rs2870590,-0.002  
18,40.828,rs9709947,-0.003  
18,40.856,rs12964673,-0.003  
18,43.705,rs8099122,-0.002  
18,44.333,rs1893384,-0.001  
18,44.406,rs12968949,-0.001  
18,44.432,rs10163723,-0.000  
18,44.555,rs4632227,-0.000  
18,44.786,rs4800106,-0.001  
18,44.817,rs11663716,-0.001  
18,44.841,rs9963336,-0.002  
18,44.918,rs10454095,-0.008  
18,45.041,rs11876487,-0.006  
18,45.100,rs1574006,-0.005  
18,45.107,rs9967373,-0.006  
18,45.129,rs8098563,-0.009  
18,45.212,rs1893251,-0.008  
18,45.213,rs12457136,-0.008  
18,45.216,rs8093101,-0.008  
18,45.229,rs4800402,-0.005  
18,45.286,rs16967483,-0.007  
18,45.298,rs472819,-0.007  
18,45.412,rs4800131,-0.001  
18,45.489,rs4404180,-0.004  
18,46.037,rs1379805,-0.004  
18,46.414,rs11874608,-0.005  
18,46.452,rs11082304,-0.004  
18,46.651,rs748717,-0.001  
18,46.764,rs4800466,-0.005  
18,47.278,rs4598991,-0.005  
18,47.282,rs1788769,-0.002  
18,48.026,rs2337235,-0.019  
18,48.089,rs2011391,-0.021  
18,48.119,rs8098360,-0.016  
18,48.136,rs4043679,-0.013  
18,48.213,rs3786418,-0.022  
18,48.254,rs4800180,-0.011  
18,48.261,rs10438983,-0.010  
18,48.266,rs9962319,-0.008  
18,48.273,rs716510,-0.013  
18,48.322,rs11873350,-0.030  
18,48.360,rs883597,-0.046  
18,48.365,rs2848605,-0.036  
18,48.387,rs1030110,-0.040  
18,48.409,rs649632,-0.042  
18,48.413,rs8085403,-0.039  
18,48.500,rs543679,-0.038  
18,48.519,rs553019,-0.036  
18,48.540,rs9959859,-0.046  
18,48.541,rs11875019,-0.047  
18,48.548,rs1791520,-0.048  
18,48.553,rs1945168,-0.053  
18,48.559,rs12969149,-0.059

18,48.561,rs1945148,-0.061  
18,48.593,rs9304469,-0.057  
18,48.627,rs339869,-0.053  
18,48.885,rs1470743,-0.056  
18,48.964,rs9304473,-0.051  
18,49.024,rs2122791,-0.032  
18,49.058,rs6508338,-0.030  
18,49.117,rs1786153,-0.021  
18,49.179,rs1668856,-0.023  
18,49.194,rs6508340,-0.016  
18,49.222,rs11876528,-0.017  
18,49.308,rs9960691,-0.015  
18,49.373,rs9963409,-0.015  
18,49.446,rs6508347,-0.013  
18,49.468,rs4129315,-0.012  
18,49.488,rs4800205,-0.010  
18,49.508,rs8086056,-0.010  
18,49.591,rs8084638,-0.008  
18,49.637,rs4131293,-0.007  
18,49.698,rs4129657,-0.006  
18,49.705,rs9947051,-0.006  
18,49.821,rs12955466,-0.004  
18,49.863,rs4550540,-0.003  
18,49.882,rs4800629,-0.002  
18,49.907,rs8083609,-0.001  
18,49.913,rs12456829,-0.001  
18,49.985,rs4800631,0.000  
18,49.989,rs11662932,0.000  
18,50.049,rs10853653,0.001  
18,50.169,rs16941505,0.001  
18,50.178,rs6508378,0.001  
18,50.328,rs273729,0.001  
18,50.448,rs1867745,0.002  
18,50.463,rs273773,0.002  
18,50.557,rs1840440,0.003  
18,50.597,rs873656,0.003  
18,50.840,rs12608228,0.002  
18,50.843,rs6508395,0.006  
18,50.935,rs12232738,0.006  
18,50.965,rs6508400,0.005  
18,51.038,rs559814,0.006  
18,51.101,rs9953448,0.005  
18,51.461,rs9959418,0.002  
18,51.503,rs3903163,0.000  
18,51.527,rs4340399,0.000  
18,51.538,rs8083585,-0.000  
18,51.600,rs7243826,0.000  
18,51.643,rs496344,0.001  
18,51.654,rs2848993,0.001  
18,51.660,rs11083175,0.002  
18,51.674,rs9807159,0.004  
18,51.749,rs470268,0.012  
18,51.755,rs535796,0.013  
18,51.784,rs7233773,0.040  
18,51.791,rs11872394,0.041  
18,51.831,rs596015,0.049  
18,51.835,rs1017414,0.050  
18,51.858,rs9951307,0.059  
18,51.876,rs151245,0.075  
18,51.904,rs1030198,0.096  
18,51.932,rs163221,0.099



18,52.014,rs6508463,0.078  
18,52.040,rs4399617,0.070  
18,52.061,rs10502485,0.078  
18,52.062,rs1485817,0.078  
18,52.122,rs12956990,0.063  
18,52.166,rs9947302,0.057  
18,52.229,rs2247559,0.047  
18,52.275,rs7243573,0.058  
18,52.344,rs1519141,0.054  
18,52.422,rs939139,0.055  
18,52.449,rs16943693,0.053  
18,52.516,rs620844,0.049  
18,52.546,rs1008854,0.035  
18,52.564,rs7237914,0.033  
18,52.618,rs16943915,0.026  
18,52.619,rs1420942,0.026  
18,52.677,rs8097440,0.026  
18,52.873,rs8098920,0.027  
18,52.873,rs7232372,0.026  
18,52.903,rs9945664,0.028  
18,52.956,rs623234,0.019  
18,53.038,rs528438,0.015  
18,53.054,rs12454164,0.014  
18,53.093,rs11564339,0.011  
18,53.203,rs9964672,0.012  
18,53.260,rs8095086,0.018  
18,53.270,rs1464612,0.019  
18,53.310,rs11564364,0.024  
18,53.334,rs11083282,0.023  
18,53.433,rs2155791,0.009  
18,53.491,rs11083301,0.005  
18,53.664,rs11083322,0.011  
18,53.816,rs1515215,0.014  
18,53.867,rs983950,0.016  
18,53.901,rs8087422,0.013  
18,53.961,rs9949320,0.016  
18,53.997,rs16946751,0.018  
18,54.117,rs7241357,0.027  
18,54.204,rs4800925,0.028  
18,54.344,rs16947092,0.019  
18,54.363,rs1492817,0.017  
18,54.454,rs9630799,0.010  
18,54.539,rs16947335,0.008  
18,54.584,rs12965399,0.007  
18,54.616,rs9967020,0.008  
18,54.681,rs12608350,0.023  
18,54.695,rs16947786,0.023  
18,54.718,rs4499314,0.024  
18,54.755,rs10502549,0.024  
18,54.769,rs1348336,0.024  
18,54.778,rs7230529,0.024  
18,54.823,rs2542729,0.039  
18,54.837,rs2617921,0.043  
18,54.933,rs2850267,0.068  
18,54.960,rs3910337,0.075  
18,55.005,rs10502553,0.087  
18,55.015,rs1789041,0.105  
18,55.015,rs12185409,0.106  
18,55.020,rs1790690,0.110  
18,55.022,rs8765,0.110  
18,55.032,rs276910,0.123

18,55.050,rs1595350,0.127  
18,55.054,rs1126214,0.125  
18,55.059,rs1893963,0.128  
18,55.063,rs10084050,0.131  
18,55.069,rs1612474,0.137  
18,55.107,rs11081680,0.194  
18,55.114,rs1437606,0.206  
18,55.168,rs9952617,0.275  
18,55.186,rs8091003,0.251  
18,55.194,rs10502568,0.240  
18,55.211,rs17802140,0.243  
18,55.222,rs6506921,0.245  
18,55.236,rs724482,0.269  
18,55.248,rs8091481,0.255  
18,55.284,rs1791235,0.195  
18,55.293,rs9304102,0.186  
18,55.346,rs7240561,0.175  
18,55.351,rs10775449,0.175  
18,55.379,rs4799316,0.204  
18,55.400,rs10502578,0.207  
18,55.417,rs11873080,0.210  
18,55.569,rs9963048,0.238  
18,55.593,rs2009538,0.269  
18,55.610,rs6506955,0.281  
18,55.630,rs11662928,0.297  
18,55.683,rs168058,0.331  
18,55.737,rs12607965,0.362  
18,55.798,rs4799636,0.396  
18,55.807,rs7244700,0.400  
18,55.839,rs2241891,0.411  
18,55.872,rs16962901,0.417  
18,55.877,rs660959,0.427  
18,55.880,rs4462681,0.427  
18,56.238,rs11662813,0.329  
18,56.728,rs4630625,0.255  
18,56.840,rs8090097,0.252  
18,56.972,rs4799358,0.255  
18,57.097,rs6650640,0.241  
18,57.109,rs9952705,0.240  
18,57.128,rs12966991,0.235  
18,57.196,rs4799751,0.211  
18,57.310,rs1521788,0.226  
18,57.349,rs8092794,0.257  
18,57.371,rs2509595,0.258  
18,57.466,rs8089375,0.265  
18,57.576,rs1383290,0.262  
18,57.613,rs17668591,0.259  
18,57.676,rs2288085,0.260  
18,57.688,rs10502637,0.259  
18,57.745,rs680798,0.273  
18,57.781,rs8086062,0.223  
18,57.784,rs355315,0.219  
18,57.878,rs3786394,0.183  
18,57.960,rs17646987,0.161  
18,58.047,rs8095692,0.162  
18,58.396,rs3786391,0.170  
18,58.429,rs1006388,0.171  
18,58.435,rs16967040,0.171  
18,59.175,rs1789529,0.128  
18,59.197,rs1540043,0.126  
18,59.294,rs623053,0.156

18,59.298,rs579596,0.156  
18,59.310,rs16967576,0.190  
18,59.319,rs2848584,0.182  
18,59.358,rs3786276,0.174  
18,59.358,rs598246,0.174  
18,59.364,rs3786278,0.170  
18,59.365,rs12454634,0.170  
18,59.374,rs12604338,0.165  
18,59.397,rs4799863,0.152  
18,59.457,rs16967780,0.109  
18,59.481,rs9955084,0.092  
18,59.503,rs2000661,0.080  
18,59.542,rs1790649,0.066  
18,59.590,rs17650811,0.058  
18,59.625,rs7236364,0.070  
18,59.636,rs7242523,0.088  
18,59.645,rs4799421,0.089  
18,59.692,rs12956471,0.095  
18,59.710,rs8091163,0.090  
18,59.711,rs4799869,0.090  
18,59.714,rs16967993,0.090  
18,59.714,rs12104044,0.089  
18,59.725,rs685435,0.089  
18,59.843,rs669086,0.112  
18,59.944,rs9965261,0.099  
18,59.968,rs9948912,0.097  
18,59.969,rs1786068,0.097  
18,59.975,rs3865390,0.110  
18,59.977,rs3889769,0.110  
18,59.987,rs1786818,0.101  
18,59.989,rs2187048,0.099  
18,59.990,rs1954869,0.098  
18,59.993,rs1893371,0.091  
18,59.994,rs1786802,0.084  
18,59.995,rs17750345,0.084  
18,59.995,rs1786798,0.084  
18,59.999,rs9954961,0.074  
18,60.009,rs7233417,0.039  
18,60.020,rs1187252,0.020  
18,60.036,rs9954636,0.013  
18,60.041,rs8093306,0.013  
18,60.053,rs8095525,0.015  
18,60.087,rs16969659,0.013  
18,60.151,rs9946516,0.009  
18,60.230,rs7226938,0.008  
18,60.309,rs1511934,0.007  
18,60.358,rs977952,0.007  
18,60.468,rs1196939,0.002  
18,60.471,rs1511939,0.002  
18,60.505,rs1511937,0.001  
18,60.559,rs1944386,0.000  
18,60.560,rs11665446,0.000  
18,60.588,rs9284421,0.002  
18,60.641,rs1365461,0.004  
18,60.716,rs1943413,0.005  
18,60.761,rs7236042,0.005  
18,60.784,rs4476248,0.004  
18,60.830,rs10502714,0.004  
18,61.161,rs7235733,0.007  
18,61.252,rs12964741,0.007  
18,61.288,rs2276209,0.008

18,61.309,rs2589035,0.008  
18,61.360,rs1613104,0.010  
18,61.501,rs1355829,0.005  
18,61.536,rs7236890,0.004  
18,61.706,rs752216,0.001  
18,61.748,rs7236979,0.032  
18,61.759,rs4799285,0.033  
18,61.981,rs4254390,0.036  
18,62.120,rs4132081,0.024  
18,62.260,rs10502739,0.013  
18,62.368,rs9959057,0.007  
18,62.387,rs4890390,0.006  
18,62.395,rs10502750,0.006  
18,62.400,rs4633807,0.006  
18,62.434,rs1941593,0.007  
18,62.465,rs11877111,0.008  
18,62.626,rs2612332,0.007  
18,62.686,rs964274,0.005  
18,62.711,rs16975208,0.003  
18,62.739,rs2082586,0.003  
18,62.764,rs1025443,0.002  
18,62.779,rs3898586,0.003  
18,62.800,rs1432145,0.000  
18,62.810,rs7238810,-0.000  
18,63.217,rs482553,-0.000  
18,63.220,rs525776,-0.000  
18,63.232,rs6507465,-0.000  
18,63.241,rs17610383,-0.001  
18,63.262,rs11082277,-0.002  
18,63.280,rs12605243,-0.004  
18,63.282,rs655464,-0.003  
18,63.282,rs613691,-0.007  
18,63.289,rs1158604,-0.006  
18,63.300,rs618236,-0.004  
18,63.340,rs8089316,-0.007  
18,63.357,rs598839,-0.008  
18,63.515,rs7504768,-0.012  
18,63.609,rs8096948,-0.007  
18,63.636,rs17717437,-0.007  
18,64.093,rs1157964,-0.010  
18,64.157,rs1527436,-0.009  
18,64.195,rs2622796,-0.009  
18,64.235,rs8084855,-0.006  
18,64.256,rs4144407,-0.008  
18,64.448,rs6507544,-0.018  
18,64.482,rs4145182,-0.018  
18,64.623,rs1460521,-0.022  
18,64.668,rs1460509,-0.026  
18,64.744,rs1841389,-0.027  
18,64.924,rs8087931,-0.037  
18,65.194,rs1400390,-0.053  
18,65.281,rs717139,-0.060  
18,65.431,rs1456614,-0.074  
18,65.780,rs7237741,-0.099  
18,65.834,rs2126334,-0.099  
18,65.876,rs7238082,-0.099  
18,65.922,rs12958322,-0.100  
18,65.998,rs11665106,-0.100  
18,66.024,rs1004945,-0.100  
18,66.103,rs10468972,-0.098  
18,66.174,rs616444,-0.097

18,66.216,rs8090594,-0.097  
18,66.245,rs9783858,-0.099  
18,66.324,rs10502850,-0.087  
18,66.348,rs12454061,-0.086  
18,66.349,rs11872951,-0.086  
18,66.366,rs4890506,-0.086  
18,66.565,rs7240958,-0.079  
18,66.569,rs4890535,-0.079  
18,66.680,rs8095304,-0.069  
18,66.853,rs2255757,-0.047  
18,66.864,rs2014869,-0.050  
18,66.924,rs8086752,-0.082  
18,66.959,rs6507618,-0.083  
18,67.049,rs2705388,-0.088  
18,67.125,rs10775478,-0.097  
18,67.179,rs1484873,-0.093  
18,67.204,rs1552325,-0.091  
18,67.232,rs8088466,-0.108  
18,67.253,rs7227456,-0.108  
18,67.291,rs16978461,-0.107  
18,67.298,rs1893792,-0.107  
18,67.298,rs3760578,-0.107  
18,67.539,rs3744998,-0.116  
18,67.635,rs10048241,-0.107  
18,67.683,rs10853539,-0.100  
18,67.839,rs9807399,-0.096  
18,68.246,rs17758320,-0.083  
18,68.342,rs4890637,-0.082  
18,68.348,rs754858,-0.082  
18,68.406,rs11082521,-0.095  
18,68.466,rs2364835,-0.113  
18,68.486,rs9962113,-0.102  
18,68.499,rs7242055,-0.096  
18,68.574,rs3911131,-0.082  
18,68.625,rs7232954,-0.093  
18,68.785,rs10468983,-0.099  
18,68.829,rs1868711,-0.090  
18,68.854,rs11661050,-0.085  
18,68.856,rs732108,-0.085  
18,68.875,rs16978577,-0.096  
18,68.909,rs1078174,-0.125  
18,68.924,rs12956914,-0.132  
18,69.670,rs2010834,-0.088  
18,70.048,rs7231801,-0.084  
18,70.062,rs1347340,-0.085  
18,70.210,rs1893786,-0.083  
18,70.217,rs12956050,-0.082  
18,70.281,rs2004310,-0.101  
18,70.380,rs8090717,-0.130  
18,70.407,rs2136619,-0.137  
18,70.437,rs17798773,-0.121  
18,70.453,rs9635893,-0.116  
18,70.468,rs3968537,-0.113  
18,70.602,rs9958551,-0.118  
18,70.627,rs2938033,-0.121  
18,70.681,rs2852950,-0.133  
18,70.824,rs1792670,-0.154  
18,70.918,rs4940140,-0.160  
18,70.968,rs11660291,-0.164  
18,70.974,rs7236709,-0.165  
18,70.998,rs7242462,-0.176

18,71.003,rs8099076,-0.180  
18,71.014,rs4313606,-0.187  
18,71.024,rs4939701,-0.194  
18,71.072,rs4939719,-0.222  
18,71.086,rs4445959,-0.229  
18,71.086,rs4564645,-0.229  
18,71.113,rs4940257,-0.205  
18,71.135,rs7230288,-0.164  
18,71.174,rs11663191,-0.165  
18,71.208,rs1893948,-0.164  
18,71.219,rs1124349,-0.143  
18,71.239,rs2156650,-0.134  
18,71.260,rs8084060,-0.126  
18,71.264,rs1113629,-0.122  
18,71.306,rs1944586,-0.121  
18,71.332,rs10451390,-0.133  
18,71.376,rs4940352,-0.158  
18,71.399,rs952602,-0.145  
18,71.410,rs2187430,-0.136  
18,71.419,rs9947735,-0.133  
18,71.428,rs9953229,-0.113  
18,71.462,rs4258691,-0.089  
18,71.482,rs8087061,-0.093  
18,71.511,rs4591213,-0.104  
18,71.673,rs12607412,-0.093  
18,71.759,rs4939551,-0.091  
18,71.796,rs11082688,-0.092  
18,71.838,rs8085434,-0.093  
18,71.846,rs299734,-0.095  
18,71.862,rs6507861,-0.092  
18,71.877,rs10502895,-0.096  
18,71.910,rs12604748,-0.150  
18,71.917,rs4583322,-0.139  
18,71.957,rs3764481,-0.129  
18,71.964,rs11082704,-0.128  
18,71.972,rs11082705,-0.126  
18,72.024,rs937021,-0.118  
18,72.043,rs7240004,-0.117  
18,72.132,rs17186485,-0.111  
18,72.140,rs4939827,-0.111  
18,72.154,rs7238442,-0.111  
18,72.160,rs4939832,-0.111  
18,72.175,rs3736242,-0.114  
18,72.261,rs2878901,-0.143  
18,72.264,rs698611,-0.119  
18,72.283,rs1288813,-0.098  
18,72.294,rs357887,-0.062  
18,72.451,rs8097746,-0.089  
18,72.499,rs1838962,-0.093  
18,72.946,rs7242374,-0.102  
18,73.010,rs2097055,-0.094  
18,73.073,rs11664342,-0.086  
18,73.077,rs7235005,-0.086  
18,73.118,rs1943969,-0.084  
18,73.146,rs11875988,-0.084  
18,73.254,rs1787531,-0.078  
18,73.364,rs1942418,-0.069  
18,73.456,rs1787328,-0.065  
18,73.456,rs11663056,-0.068  
18,73.458,rs1790786,-0.080  
18,73.531,rs7240708,-0.090

18,73.547,rs9304393,-0.092  
18,73.766,rs1355410,-0.144  
18,73.791,rs8091012,-0.147  
18,73.819,rs4939622,-0.154  
18,73.891,rs2276366,-0.174  
18,73.900,rs9961704,-0.171  
18,73.927,rs4939627,-0.158  
18,74.135,rs2119547,-0.169  
18,74.393,rs11082830,-0.133  
18,74.459,rs930362,-0.129  
18,74.486,rs893315,-0.127  
18,74.604,rs1893490,-0.132  
18,74.638,rs12961853,-0.130  
18,74.680,rs9948424,-0.104  
18,74.696,rs3752088,-0.143  
18,74.700,rs7240429,-0.159  
18,74.704,rs11877439,-0.192  
18,74.707,rs2276186,-0.215  
18,74.707,rs17742992,-0.208  
18,74.707,rs2586776,-0.198  
18,74.709,rs7230138,-0.242  
18,74.710,rs2847579,-0.214  
18,74.729,rs654136,-0.213  
18,74.736,rs10163789,-0.215  
18,74.777,rs948552,-0.211  
18,74.783,rs2282543,-0.211  
18,74.799,rs16952971,-0.198  
18,74.811,rs7232265,-0.213  
18,74.829,rs6508066,-0.206  
18,74.849,rs321857,-0.214  
18,74.855,rs8089159,-0.193  
18,74.859,rs1369766,-0.181  
18,74.938,rs1893409,-0.101  
18,74.943,rs12606811,-0.093  
18,74.950,rs322548,-0.082  
18,74.987,rs322512,-0.093  
18,75.062,rs52677,-0.119  
18,75.069,rs9949310,-0.120  
18,75.203,rs2928945,-0.132  
18,75.225,rs2928953,-0.134  
18,75.227,rs1480925,-0.134  
18,75.247,rs9304414,-0.133  
18,75.254,rs7240111,-0.134  
18,75.293,rs9948203,-0.144  
18,75.363,rs9807432,-0.173  
18,75.412,rs7232159,-0.181  
18,75.447,rs1445093,-0.190  
18,75.478,rs3902020,-0.219  
18,75.491,rs698619,-0.221  
18,75.518,rs919635,-0.227  
18,75.533,rs1443568,-0.229  
18,75.562,rs11877840,-0.220  
18,75.569,rs12456286,-0.218  
18,75.591,rs17816780,-0.217  
18,75.630,rs12457422,-0.212  
18,75.640,rs2168159,-0.211  
18,75.643,rs1144050,-0.210  
18,75.661,rs1975750,-0.215  
18,75.687,rs1143768,-0.226  
18,75.708,rs2219556,-0.230  
18,75.714,rs12606567,-0.251

18,75.716,rs1675225,-0.258  
18,75.758,rs16955409,-0.244  
18,75.817,rs4939705,-0.226  
18,75.831,rs727514,-0.222  
18,75.944,rs4940235,-0.220  
18,76.055,rs6508210,-0.228  
18,76.114,rs8097413,-0.240  
18,76.233,rs2270954,-0.253  
18,76.280,rs9966535,-0.267  
18,76.359,rs9304452,-0.282  
18,76.466,rs1553108,-0.263  
18,76.467,rs1995138,-0.263  
18,76.752,rs527544,-0.330  
18,76.877,rs1657880,-0.344  
18,77.480,rs4800967,-0.389  
18,77.543,rs11152150,-0.393  
18,77.547,rs9955009,-0.470  
18,77.550,rs11661089,-0.499  
18,77.553,rs949029,-0.500  
18,77.557,rs4309482,-0.527  
18,77.560,rs9963853,-0.541  
18,77.579,rs4800985,-0.561  
18,77.607,rs1261082,-0.536  
18,77.784,rs1440475,-0.517  
18,77.787,rs10515970,-0.516  
18,78.336,rs12457157,-0.479  
18,78.524,rs784254,-0.500  
18,78.839,rs1506633,-0.464  
18,78.907,rs2588477,-0.462  
18,78.956,rs10048306,-0.465  
18,79.092,rs2535726,-0.437  
18,79.112,rs2588482,-0.447  
18,79.158,rs1789564,-0.445  
18,79.195,rs1792746,-0.442  
18,79.201,rs1789588,-0.442  
18,79.298,rs713242,-0.440  
18,79.302,rs917712,-0.440  
18,79.332,rs12455011,-0.441  
18,79.367,rs2538025,-0.439  
18,79.415,rs2010962,-0.435  
18,79.692,rs1506647,-0.390  
18,79.791,rs625628,-0.373  
18,80.108,rs9947297,-0.377  
18,80.113,rs4801054,-0.377  
18,80.185,rs1421264,-0.372  
18,80.346,rs9945880,-0.384  
18,80.471,rs1657421,-0.394  
18,80.518,rs722092,-0.396  
18,80.605,rs4800960,-0.399  
18,80.614,rs1942336,-0.400  
18,80.667,rs1943387,-0.404  
18,80.738,rs990729,-0.408  
18,80.770,rs1942965,-0.391  
18,80.771,rs2074320,-0.390  
18,80.798,rs1234635,-0.375  
18,80.836,rs1217562,-0.368  
18,80.907,rs4940406,-0.400  
18,81.094,rs644016,-0.509  
18,81.252,rs515897,-0.474  
18,81.266,rs663774,-0.470  
18,81.317,rs2269222,-0.468



18,81.361,rs492274,-0.476  
18,81.405,rs11356,-0.482  
18,81.547,rs17832328,-0.440  
18,81.634,rs319448,-0.418  
18,81.760,rs17064003,-0.412  
18,81.808,rs12961881,-0.408  
18,81.844,rs7239484,-0.397  
18,81.858,rs2663842,-0.390  
18,81.863,rs12960272,-0.388  
18,81.889,rs2571225,-0.375  
18,81.947,rs2571232,-0.321  
18,82.011,rs17692241,-0.305  
18,82.025,rs8094024,-0.301  
18,82.133,rs4121751,-0.274  
18,82.202,rs7240052,-0.291  
18,82.215,rs4940582,-0.291  
18,82.389,rs12456113,-0.286  
18,82.391,rs12968095,-0.317  
18,82.474,rs9953073,-0.270  
18,82.524,rs4528665,-0.224  
18,82.665,rs12967469,-0.126  
18,82.693,rs500733,-0.139  
18,82.701,rs17064378,-0.139  
18,82.703,rs4940643,-0.139  
18,82.762,rs549476,-0.144  
18,82.763,rs878396,-0.144  
18,82.799,rs9957844,-0.148  
18,83.010,rs158857,-0.255  
18,83.199,rs4941388,-0.226  
18,83.225,rs4058287,-0.220  
18,83.584,rs4369757,-0.192  
18,83.610,rs3744866,-0.189  
18,83.668,rs7240339,-0.189  
18,83.750,rs12103986,-0.186  
18,83.770,rs11152081,-0.179  
18,83.806,rs7238217,-0.169  
18,83.837,rs11152086,-0.160  
18,83.966,rs9944639,-0.157  
18,84.003,rs11873676,-0.156  
18,84.127,rs9964749,-0.136  
18,84.374,rs12454711,-0.093  
18,84.534,rs7507051,-0.085  
18,84.653,rs11152103,-0.066  
18,84.859,rs3826597,-0.050  
18,84.947,rs4940787,-0.035  
18,84.980,rs7226455,-0.047  
18,84.987,rs755719,-0.049  
18,85.031,rs1543159,-0.049  
18,85.070,rs3744893,-0.035  
18,85.081,rs645492,-0.031  
18,85.115,rs561894,-0.016  
18,85.494,rs4629079,-0.003  
18,85.495,rs7241697,-0.002  
18,85.498,rs7228727,-0.000  
18,85.508,rs585632,-0.006  
18,85.582,rs599680,-0.010  
18,85.656,rs8096073,-0.016  
18,85.686,rs10503029,-0.017  
18,85.751,rs3133206,-0.037  
18,85.919,rs12606960,-0.030  
18,85.923,rs12970058,-0.029

18,85.967,rs1652069,-0.026  
18,85.993,rs7244658,-0.024  
18,86.003,rs3097407,-0.023  
18,86.017,rs1791316,-0.031  
18,86.020,rs10163697,-0.031  
18,86.074,rs17781327,-0.032  
18,86.106,rs1791350,-0.030  
18,86.117,rs1788841,-0.026  
18,86.154,rs4940906,-0.011  
18,86.189,rs8084711,-0.005  
18,86.234,rs12456032,-0.012  
18,86.258,rs11152187,-0.012  
18,86.286,rs7240884,-0.009  
18,86.313,rs9319956,-0.004  
18,86.368,rs7227333,-0.005  
18,86.377,rs8098717,-0.006  
18,86.439,rs768456,-0.009  
18,86.446,rs7238778,-0.009  
18,86.447,rs9958194,-0.009  
18,86.519,rs1893512,-0.009  
18,86.595,rs9954571,-0.008  
18,86.674,rs9946888,-0.008  
18,86.787,rs11872992,-0.011  
18,86.812,rs8083721,-0.012  
18,86.842,rs11661166,-0.013  
18,86.868,rs1943242,-0.018  
18,86.932,rs585187,-0.015  
18,86.968,rs12960864,-0.011  
18,86.984,rs11152238,-0.010  
18,86.990,rs8088802,-0.010  
18,87.044,rs7229783,-0.010  
18,87.319,rs12454816,-0.018  
18,87.334,rs17067559,-0.019  
18,87.374,rs2332079,-0.023  
18,87.607,rs154931,-0.037  
18,87.624,rs154916,-0.027  
18,87.712,rs950408,-0.028  
18,87.748,rs8086807,-0.028  
18,87.799,rs7231989,-0.018  
18,87.807,rs1495805,-0.017  
18,87.832,rs1908593,-0.012  
18,87.850,rs17068252,-0.009  
18,87.862,rs9954337,-0.007  
18,87.867,rs10871791,-0.006  
18,87.889,rs2159595,-0.002  
18,87.907,rs929525,-0.000  
18,87.928,rs17748357,-0.000  
18,87.962,rs2535357,0.001  
18,87.991,rs12964819,0.002  
18,87.995,rs1943334,0.003  
18,87.997,rs2051346,0.002  
18,88.000,rs1943329,0.001  
18,88.039,rs7239572,0.001  
18,88.061,rs17068541,0.001  
18,88.124,rs9962500,0.002  
18,88.185,rs17068758,0.002  
18,88.281,rs4941050,0.004  
18,88.285,rs4490091,0.004  
18,88.294,rs2282651,0.004  
18,88.296,rs4941051,0.004  
18,88.303,rs4941055,0.009

18,88.330,rs9959847,0.016  
18,88.407,rs8085961,0.026  
18,88.430,rs9807754,0.026  
18,88.497,rs7232902,0.029  
18,88.531,rs8096507,0.031  
18,88.710,rs1788070,0.030  
18,88.715,rs17069203,0.031  
18,88.796,rs930171,0.034  
18,89.085,rs9948708,0.047  
18,89.229,rs9951012,0.057  
18,89.232,rs1805034,0.057  
18,89.262,rs2957128,0.059  
18,89.277,rs2957146,0.067  
18,89.291,rs8094440,0.080  
18,89.311,rs948758,0.092  
18,89.319,rs10503071,0.093  
18,89.350,rs7238925,0.096  
18,89.394,rs17070072,0.099  
18,89.397,rs8091832,0.100  
18,89.437,rs1052315,0.106  
18,89.453,rs2105728,0.099  
18,89.459,rs4940563,0.095  
18,89.480,rs9946161,0.091  
18,89.617,rs595146,0.066  
18,89.690,rs541425,0.063  
18,89.743,rs17746008,0.063  
18,90.085,rs4941171,0.060  
18,90.122,rs7242360,0.057  
18,90.147,rs9949366,0.056  
18,90.239,rs6567313,0.048  
18,90.552,rs7230761,0.048  
18,90.557,rs4987853,0.056  
18,90.557,rs4987852,0.056  
18,90.563,rs4456611,0.048  
18,90.573,rs17070798,0.076  
18,90.574,rs6567328,0.075  
18,90.574,rs12454712,0.074  
18,90.576,rs1481031,0.071  
18,90.586,rs720321,0.092  
18,90.594,rs8083946,0.098  
18,90.596,rs11872329,0.096  
18,90.603,rs3927911,0.088  
18,90.608,rs8096471,0.072  
18,90.611,rs1381548,0.063  
18,90.614,rs2850761,0.061  
18,90.634,rs489520,0.051  
18,90.640,rs9946122,0.049  
18,90.640,rs9807674,0.049  
18,90.752,rs4560010,0.032  
18,90.794,rs10163809,0.022  
18,90.853,rs2271253,0.022  
18,90.892,rs1455555,0.021  
18,90.900,rs9961311,0.021  
18,90.957,rs10503081,0.024  
18,91.029,rs17698252,0.023  
18,91.042,rs755163,0.024  
18,91.278,rs3853683,0.031  
18,91.385,rs6567383,0.036  
18,91.461,rs7245010,0.036  
18,91.550,rs1720853,0.038  
18,91.655,rs1701603,0.039

18,91.883,rs8097425,0.027  
18,92.036,rs2162352,0.019  
18,92.113,rs1460967,0.011  
18,92.411,rs4941246,0.030  
18,92.459,rs17072617,0.039  
18,92.462,rs957789,0.040  
18,92.518,rs9676116,0.040  
18,92.524,rs4292016,0.040  
18,92.564,rs8086559,0.035  
18,92.614,rs1019433,0.036  
18,92.641,rs10515993,0.036  
18,92.650,rs12960757,0.042  
18,92.661,rs2959470,0.050  
18,92.691,rs8094758,0.056  
18,92.708,rs7235285,0.064  
18,92.710,rs9320046,0.065  
18,92.733,rs4346287,0.061  
18,92.762,rs1506232,0.074  
18,92.774,rs7239193,0.083  
18,92.833,rs1035208,0.116  
18,92.861,rs637644,0.122  
18,92.896,rs1587962,0.148  
18,92.899,rs11151195,0.146  
18,92.909,rs470497,0.137  
18,92.928,rs565973,0.115  
18,92.939,rs610091,0.125  
18,92.961,rs12965811,0.157  
18,92.969,rs4941343,0.170  
18,93.001,rs17074993,0.183  
18,93.032,rs7229020,0.196  
18,93.711,rs2587416,0.117  
18,93.724,rs2541868,0.116  
18,93.752,rs7231837,0.118  
18,93.870,rs2706586,0.145  
18,94.375,rs8097107,0.132  
18,94.425,rs8097294,0.129  
18,94.540,rs4510132,0.124  
18,94.556,rs10782022,0.123  
18,94.722,rs1787502,0.116  
18,94.873,rs2040212,0.110  
18,94.874,rs12458066,0.110  
18,94.874,rs17810856,0.110  
18,95.226,rs12606152,0.111  
18,95.294,rs10516001,0.116  
18,95.483,rs2114507,0.131  
18,95.504,rs9949630,0.130  
18,95.579,rs12957557,0.130  
18,95.580,rs2156439,0.130  
18,95.606,rs7240637,0.148  
18,95.611,rs4494651,0.154  
18,95.627,rs4281825,0.165  
18,95.639,rs7228283,0.176  
18,95.693,rs8085939,0.184  
18,95.907,rs4891598,0.153  
18,95.999,rs8099213,0.173  
18,96.061,rs9319727,0.182  
18,96.096,rs17077145,0.189  
18,96.097,rs2124349,0.190  
18,96.112,rs4510133,0.191  
18,96.133,rs11877044,0.195  
18,96.157,rs7244686,0.199

18,96.215,rs2279269,0.142  
18,96.266,rs436463,0.112  
18,96.268,rs395393,0.109  
18,96.294,rs875922,0.067  
18,96.295,rs894910,0.067  
18,96.301,rs17077611,0.060  
18,96.497,rs4127445,0.040  
18,97.087,rs654875,0.038  
18,97.376,rs8084950,0.032  
18,97.766,rs8096215,0.015  
18,97.785,rs13381776,0.013  
18,97.801,rs1016443,0.012  
18,97.885,rs17078587,0.003  
18,97.889,rs17078595,0.004  
18,97.892,rs596045,0.005  
18,97.893,rs582576,0.013  
18,97.894,rs7504149,0.017  
18,97.907,rs8084412,0.012  
18,97.934,rs6566351,0.003  
18,97.945,rs683011,0.002  
18,97.965,rs645257,0.001  
18,97.966,rs593418,0.001  
18,97.987,rs17802226,0.005  
18,98.078,rs481796,0.005  
18,98.098,rs1400402,0.004  
18,98.121,rs3897843,0.005  
18,98.153,rs2319554,0.005  
18,98.166,rs7229736,0.001  
18,98.167,rs1547548,0.004  
18,98.211,rs979317,0.001  
18,98.309,rs309251,0.000  
18,98.319,rs17079623,0.000  
18,98.322,rs2048329,-0.000  
18,98.359,rs677592,-0.000  
18,98.395,rs590974,-0.000  
18,98.434,rs1942295,-0.000  
18,98.467,rs1986337,-0.000  
18,98.481,rs10445526,-0.000  
18,98.586,rs11873439,-0.000  
18,98.612,rs3891810,-0.000  
18,98.665,rs495236,-0.000  
18,98.691,rs547660,-0.000  
18,98.694,rs1472870,-0.000  
18,98.716,rs10513958,0.000  
18,98.754,rs1354966,0.003  
18,98.779,rs4359550,0.001  
18,98.797,rs1532662,0.001  
18,98.817,rs1354065,0.001  
18,98.913,rs2034021,0.002  
18,98.923,rs8083908,0.003  
18,98.963,rs8087067,0.018  
18,98.971,rs4491635,0.020  
18,98.983,rs1442671,0.022  
18,98.995,rs10513965,0.025  
18,99.073,rs11151513,0.044  
18,99.130,rs11151522,0.051  
18,99.209,rs1961994,0.055  
18,99.254,rs4494649,0.053  
18,99.280,rs17062094,0.047  
18,99.303,rs882114,0.042  
18,99.311,rs12104016,0.040

18,99.337,rs8086400,0.035  
18,99.414,rs1788103,0.032  
18,99.456,rs1788112,0.025  
18,99.459,rs1788245,0.024  
18,99.549,rs1539964,0.013  
18,99.921,rs4891821,0.002  
18,100.003,rs283258,0.001  
18,100.011,rs2628269,0.001  
18,100.090,rs7230661,0.000  
18,100.143,rs1484735,0.001  
18,100.180,rs7234673,0.002  
18,100.189,rs7244215,0.002  
18,100.190,rs1992344,0.002  
18,100.198,rs3943675,0.000  
18,100.210,rs2581690,0.001  
18,100.227,rs2366188,0.001  
18,100.242,rs2581720,0.002  
18,100.251,rs10513985,0.002  
18,100.269,rs10513984,0.002  
18,100.283,rs10871668,0.002  
18,100.291,rs9953114,0.002  
18,100.350,rs7239026,0.002  
18,100.383,rs1922109,0.002  
18,100.762,rs12967006,-0.001  
18,101.228,rs1529210,-0.001  
18,101.464,rs1282706,0.000  
18,101.545,rs1395849,0.000  
18,101.819,rs2698158,0.000  
18,102.081,rs7235962,0.000  
18,102.105,rs2226737,0.000  
18,102.169,rs1942196,0.000  
18,102.350,rs2156025,-0.000  
18,102.503,rs9956054,-0.001  
18,102.601,rs12605863,-0.001  
18,102.622,rs716863,-0.001  
18,102.674,rs1942161,-0.001  
18,103.195,rs996919,-0.000  
18,103.230,rs17084114,-0.002  
18,103.237,rs2000840,-0.006  
18,103.390,rs17219377,-0.010  
18,103.422,rs1539909,-0.012  
18,103.497,rs8090683,-0.020  
18,103.602,rs4600562,-0.024  
18,103.609,rs4891443,-0.027  
18,103.648,rs948665,-0.027  
18,103.669,rs11151691,-0.031  
18,103.699,rs1505749,-0.045  
18,103.725,rs2135271,-0.063  
18,103.756,rs868812,-0.087  
18,103.769,rs7227772,-0.086  
18,103.854,rs17085106,-0.091  
18,104.046,rs10514025,-0.103  
18,104.139,rs2685441,-0.108  
18,104.435,rs4330010,-0.131  
18,104.710,rs10514031,-0.154  
18,104.720,rs11151721,-0.155  
18,104.972,rs12326317,-0.158  
18,105.244,rs8092744,-0.161  
18,105.904,rs4268850,-0.174  
18,106.009,rs7242135,-0.188  
18,106.129,rs4572503,-0.201

18,106.443,rs7236872,-0.182  
18,106.541,rs9959846,-0.181  
18,106.882,rs8090911,-0.172  
18,107.047,rs12605412,-0.155  
18,107.058,rs12956651,-0.155  
18,107.242,rs7228776,-0.157  
18,107.710,rs11661663,-0.170  
18,108.026,rs6566644,-0.170  
18,108.166,rs7236585,-0.158  
18,108.631,rs4316844,-0.134  
18,108.693,rs1943823,-0.139  
18,108.719,rs2187366,-0.141  
18,108.874,rs8094247,-0.170  
18,108.888,rs17087309,-0.169  
18,109.195,rs1113683,-0.159  
18,109.351,rs4555235,-0.164  
18,109.591,rs11873008,-0.176  
18,109.784,rs1981375,-0.195  
18,110.049,rs7240777,-0.211  
18,110.367,rs1942771,-0.205  
18,110.419,rs17087818,-0.204  
18,110.443,rs12967668,-0.206  
18,110.546,rs12958280,-0.203  
18,110.591,rs9950388,-0.161  
18,110.601,rs4563123,-0.160  
18,110.636,rs1943885,-0.154  
18,110.670,rs17088148,-0.175  
18,110.697,rs11875698,-0.193  
18,110.728,rs7243786,-0.255  
18,110.734,rs12955729,-0.256  
18,110.742,rs1430532,-0.253  
18,110.745,rs11872509,-0.248  
18,110.766,rs4891524,-0.264  
18,110.776,rs4892142,-0.287  
18,110.779,rs1367345,-0.288  
18,110.784,rs12954871,-0.288  
18,110.790,rs751224,-0.287  
18,110.796,rs7227420,-0.316  
18,110.797,rs9319887,-0.330  
18,110.799,rs1560433,-0.367  
18,110.805,rs8086918,-0.347  
18,110.827,rs1560430,-0.381  
18,110.884,rs4891530,-0.381  
18,110.942,rs8086628,-0.444  
18,110.967,rs2850526,-0.466  
18,111.004,rs2850531,-0.470  
18,111.016,rs8090208,-0.479  
18,111.034,rs17088617,-0.490  
18,111.082,rs2850492,-0.582  
18,111.279,rs9945428,-0.688  
18,111.364,rs12605204,-0.687  
18,111.370,rs1788645,-0.688  
18,111.452,rs11151935,-0.679  
18,111.474,rs9319895,-0.610  
18,111.481,rs9948558,-0.611  
18,111.482,rs7233554,-0.612  
18,111.531,rs1788625,-0.622  
18,111.690,rs12965832,-0.653  
18,111.737,rs2096949,-0.650  
18,111.764,rs17807682,-0.620  
18,111.778,rs1149882,-0.614

18,111.801,rs9955537,-0.591  
18,111.825,rs4892210,-0.530  
18,111.850,rs2278155,-0.492  
18,111.867,rs1991277,-0.503  
18,111.884,rs2162256,-0.535  
18,111.966,rs17089353,-0.632  
18,111.979,rs3794954,-0.647  
18,112.104,rs12964208,-0.713  
18,112.188,rs9967490,-0.698  
18,112.211,rs12960862,-0.708  
18,112.240,rs7506929,-0.720  
18,112.288,rs2887,-0.738  
18,113.900,rs1863417,-0.827  
18,114.436,rs2120144,-0.920  
18,114.650,rs7359804,-0.903  
18,114.710,rs906517,-0.911  
18,114.857,rs8083466,-0.913  
18,114.883,rs4891233,-0.918  
18,114.956,rs1828098,-0.927  
18,114.995,rs9957684,-0.927  
18,115.049,rs7231415,-0.926  
18,115.167,rs629126,-0.944  
18,116.306,rs4316840,-1.214  
18,116.486,rs2584295,-1.323  
18,116.491,rs2212841,-1.323  
18,116.514,rs997800,-1.319  
18,116.531,rs4891084,-1.313  
18,116.620,rs1943200,-1.320  
18,116.641,rs11150909,-1.319  
18,116.655,rs17058081,-1.312  
18,116.686,rs1380711,-1.261  
18,116.691,rs8089562,-1.240  
18,116.713,rs9956878,-1.191  
18,116.750,rs12454238,-1.137  
18,116.760,rs7241677,-1.173  
18,116.784,rs8087536,-1.219  
18,116.820,rs898491,-1.214  
18,116.887,rs1507465,-1.194  
18,116.922,rs2405937,-1.265  
18,117.046,rs359775,-1.138  
18,117.112,rs7237886,-1.100  
18,117.159,rs359724,-1.084  
18,117.162,rs181698,-1.083  
18,117.214,rs12958111,-1.020  
18,117.216,rs1030567,-1.020  
18,117.398,rs8094564,-0.961  
18,117.677,rs2554840,-0.954  
18,117.798,rs11150946,-0.696  
18,117.807,rs690191,-0.685  
18,117.828,rs11150948,-0.697  
18,117.847,rs3991209,-0.700  
18,117.859,rs4891017,-0.695  
18,117.920,rs690243,-0.702  
18,118.045,rs17355430,-0.696  
18,118.075,rs11662423,-0.695  
18,118.114,rs2042717,-0.679  
18,118.169,rs12456640,-0.686  
18,118.221,rs9676094,-0.659  
18,118.240,rs7232036,-0.688  
18,118.269,rs2174896,-0.734  
18,118.277,rs9958262,-0.744



18,118.335,rs12327455,-0.750  
18,118.384,rs8084598,-0.753  
18,118.392,rs8098963,-0.753  
18,118.424,rs4891028,-0.747  
18,118.430,rs1553664,-0.746  
18,118.441,rs10514219,-0.740  
18,118.458,rs9951738,-0.734  
18,118.473,rs4635419,-0.724  
18,118.535,rs9952696,-0.632  
18,118.571,rs3829636,-0.605  
18,118.596,rs9945487,-0.563  
18,118.671,rs9957453,-0.603  
18,118.711,rs11876497,-0.607  
18,118.739,rs11660099,-0.606  
18,118.793,rs2174893,-0.649  
18,118.809,rs8086928,-0.659  
18,118.899,rs9947426,-0.718  
18,119.003,rs17650693,-0.676  
18,119.004,rs4890926,-0.676  
18,119.136,rs9949626,-0.633  
18,119.165,rs4552096,-0.636  
18,119.474,rs12957245,-0.663  
18,119.771,rs9675994,-0.685  
18,119.799,rs470903,-0.691  
18,119.805,rs3794842,-0.692  
18,119.824,rs470261,-0.693  
18,119.854,rs4890876,-0.695  
18,119.903,rs8092433,-0.680  
18,119.940,rs470542,-0.696  
18,120.004,rs7241461,-0.744  
18,120.068,rs9959822,-0.564  
18,120.084,rs1667914,-0.553  
18,120.098,rs4890890,-0.530  
18,120.112,rs4890891,-0.526  
18,120.125,rs4890893,-0.524  
18,120.165,rs1789089,-0.498  
18,120.198,rs1789079,-0.471  
18,120.241,rs1789121,-0.464  
18,120.425,rs11151009,-0.453  
18,120.504,rs12964446,-0.417  
18,120.586,rs2850889,-0.422  
18,120.680,rs2717128,-0.348  
18,120.785,rs7232802,-0.275  
18,120.829,rs874299,-0.281  
18,120.860,rs4480888,-0.299  
18,120.866,rs7244908,-0.321  
18,120.882,rs7241510,-0.295  
18,120.884,rs7231666,-0.318  
18,120.892,rs8085467,-0.329  
18,120.935,rs11659340,-0.338  
18,120.952,rs756238,-0.326  
18,120.982,rs7239601,-0.332  
18,120.985,rs4890948,-0.329  
18,120.990,rs12606766,-0.324  
18,120.997,rs7505169,-0.344  
18,121.104,rs8087753,-0.342  
18,121.114,rs517543,-0.336  
18,121.130,rs512467,-0.335  
18,121.188,rs12456242,-0.337  
18,121.199,rs954043,-0.337  
18,121.209,rs2246422,-0.340

18,121.271,rs2135401,-0.347  
18,121.304,rs6566033,-0.327  
18,121.310,rs12956032,-0.325  
18,121.330,rs2407044,-0.317  
18,121.391,rs12457067,-0.272  
18,121.433,rs9949956,-0.288  
18,121.485,rs11665253,-0.301  
18,121.529,rs7234776,-0.326  
18,121.539,rs4799153,-0.364  
18,121.545,rs4798954,-0.395  
18,121.550,rs11662621,-0.360  
18,121.558,rs9965906,-0.359  
18,121.565,rs1505131,-0.361  
18,121.585,rs1505129,-0.371  
18,121.609,rs7237276,-0.387  
18,121.632,rs7227404,-0.432  
18,121.666,rs8087551,-0.511  
18,121.684,rs4458091,-0.575  
18,121.693,rs11081602,-0.593  
18,121.724,rs8085865,-0.628  
18,121.738,rs5026446,-0.652  
18,121.742,rs612097,-0.620  
18,121.754,rs9949324,-0.613  
18,121.796,rs9960674,-0.587  
18,121.811,rs643444,-0.584  
18,121.822,rs673112,-0.577  
18,121.846,rs12607049,-0.558  
18,121.888,rs8097843,-0.539  
18,121.895,rs7232988,-0.507  
18,121.949,rs6506837,-0.462  
18,122.067,rs2941853,-0.449  
18,122.070,rs2941812,-0.449  
18,122.089,rs8092008,-0.442  
18,122.130,rs2015066,-0.409  
18,122.136,rs9945493,-0.406  
18,122.169,rs6506853,-0.390  
18,122.183,rs1113678,-0.386  
18,122.242,rs4799238,-0.442  
18,122.249,rs2927260,-0.442  
18,122.263,rs6506869,-0.441  
18,122.278,rs4030885,-0.436  
18,122.317,rs9957519,-0.421  
18,122.343,rs558191,-0.426  
18,122.605,rs8082857,-0.483  
18,122.664,rs12458154,-0.453  
18,122.728,rs549752,-0.359  
18,122.734,rs8091180,-0.347  
18,122.750,rs4799055,-0.359  
18,122.767,rs306872,-0.339  
18,122.807,rs1667667,-0.331  
18,122.835,rs177820,-0.359  
18,122.846,rs9518,-0.368  
18,122.848,rs3852836,-0.368  
18,122.856,rs4799062,-0.364  
18,122.880,rs3852840,-0.368  
18,122.903,rs4239343,-0.376  
18,122.910,rs748938,-0.390  
18,122.914,rs3848478,-0.392  
18,123.073,rs585811,-0.340  
18,123.085,rs526260,-0.336  
18,123.115,rs2126083,-0.335

18,123.226,rs10853393,-0.332  
18,123.236,rs8083927,-0.363  
18,123.313,rs3744872,-0.359  
18,123.349,rs488292,-0.359  
18,123.461,rs7243052,-0.360  
19,0.162,rs11878692,-0.097  
19,0.182,rs9304882,-0.097  
19,0.284,rs3764640,-0.115  
19,0.466,rs2301759,-0.110  
19,0.607,rs968698,-0.102  
19,0.831,rs1558130,-0.088  
19,1.155,rs2285972,-0.064  
19,1.471,rs3786978,-0.065  
19,2.001,rs197198,-0.080  
19,2.120,rs2292453,-0.131  
19,2.183,rs1875960,-0.141  
19,2.187,rs11878864,-0.141  
19,2.429,rs7252741,-0.163  
19,2.831,rs1860661,-0.219  
19,2.967,rs12460684,-0.247  
19,3.089,rs11084906,-0.246  
19,3.191,rs2041218,-0.255  
19,3.234,rs4807953,-0.264  
19,3.543,rs4807140,-0.384  
19,3.606,rs3764606,-0.387  
19,3.670,rs8100856,-0.387  
19,4.384,rs4807169,-0.347  
19,4.397,rs11084919,-0.345  
19,4.417,rs7259201,-0.345  
19,4.620,rs2041120,-0.336  
19,4.918,rs10421179,-0.357  
19,5.096,rs1599860,-0.374  
19,5.264,rs758145,-0.445  
19,5.302,rs7256023,-0.456  
19,5.552,rs2072304,-0.532  
19,5.578,rs1017084,-0.537  
19,5.895,rs2864419,-0.593  
19,6.132,rs12459507,-0.602  
19,6.214,rs7253181,-0.623  
19,6.338,rs4806834,-0.653  
19,6.420,rs2523177,-0.653  
19,6.836,rs12982784,-0.647  
19,6.916,rs757322,-0.646  
19,7.162,rs7248779,-0.612  
19,7.269,rs735911,-0.596  
19,7.622,rs13345846,-0.511  
19,7.634,rs11670333,-0.506  
19,7.681,rs4807284,-0.482  
19,7.716,rs8113001,-0.464  
19,7.718,rs8100484,-0.462  
19,7.749,rs10416524,-0.433  
19,7.790,rs17755100,-0.446  
19,7.807,rs12985186,-0.447  
19,7.912,rs8113423,-0.385  
19,7.943,rs887270,-0.383  
19,7.997,rs12975010,-0.412  
19,8.015,rs10416033,-0.424  
19,8.081,rs3936139,-0.444  
19,8.134,rs2965208,-0.431  
19,8.159,rs2873409,-0.409  
19,8.193,rs10411547,-0.387

19,8.199,rs7257500,-0.384  
19,8.312,rs9630890,-0.371  
19,8.385,rs2110119,-0.363  
19,8.647,rs4806874,-0.331  
19,9.042,rs1610062,-0.251  
19,9.053,rs4806877,-0.249  
19,9.154,rs9304900,-0.249  
19,9.319,rs2288958,-0.194  
19,9.380,rs3786948,-0.184  
19,9.453,rs11666431,-0.186  
19,9.488,rs8111642,-0.187  
19,9.542,rs11667371,-0.185  
19,9.647,rs216276,-0.239  
19,9.653,rs83488,-0.241  
19,9.664,rs11084990,-0.242  
19,9.679,rs3760961,-0.234  
19,9.757,rs1688128,-0.185  
19,9.950,rs7938,-0.189  
19,10.031,rs367825,-0.187  
19,10.155,rs8109448,-0.180  
19,10.371,rs2238625,-0.157  
19,10.455,rs3746069,-0.185  
19,10.611,rs310686,-0.220  
19,10.636,rs1465245,-0.230  
19,10.792,rs2074864,-0.271  
19,10.793,rs2074865,-0.272  
19,10.876,rs1682809,-0.281  
19,10.987,rs3746070,-0.261  
19,11.182,rs426633,-0.239  
19,11.364,rs17696630,-0.256  
19,11.423,rs11879556,-0.261  
19,11.474,rs313784,-0.248  
19,11.475,rs17674346,-0.249  
19,11.493,rs7252291,-0.266  
19,11.525,rs4807437,-0.296  
19,11.572,rs4807441,-0.303  
19,11.635,rs10405694,-0.320  
19,11.677,rs4807451,-0.331  
19,11.742,rs718202,-0.332  
19,11.872,rs4806933,-0.381  
19,11.933,rs4806934,-0.411  
19,12.238,rs4807485,-0.431  
19,12.300,rs7248491,-0.461  
19,12.394,rs11085023,-0.508  
19,12.444,rs8113232,-0.474  
19,12.460,rs2108389,-0.464  
19,12.575,rs10412882,-0.447  
19,12.689,rs757454,-0.430  
19,12.742,rs11672559,-0.416  
19,12.814,rs740873,-0.404  
19,12.972,rs501168,-0.388  
19,13.027,rs13960,-0.372  
19,13.125,rs4807511,-0.329  
19,13.173,rs2285957,-0.312  
19,13.336,rs11670741,-0.290  
19,13.398,rs10401177,-0.280  
19,13.451,rs11085044,-0.298  
19,13.508,rs3810374,-0.352  
19,13.574,rs10412199,-0.389  
19,13.592,rs2304191,-0.400  
19,13.628,rs10406174,-0.418

19,13.850,rs3760903,-0.364  
19,14.140,rs350912,-0.335  
19,14.207,rs12459940,-0.335  
19,14.278,rs350825,-0.325  
19,14.358,rs16992288,-0.313  
19,14.412,rs352493,-0.305  
19,14.416,rs4807546,-0.305  
19,14.428,rs352494,-0.307  
19,14.523,rs8110516,-0.317  
19,14.620,rs353694,-0.294  
19,14.768,rs888930,-0.318  
19,14.959,rs8102860,-0.323  
19,15.235,rs243372,-0.262  
19,15.358,rs10421126,-0.233  
19,15.428,rs892161,-0.220  
19,15.556,rs11085080,-0.224  
19,15.570,rs966384,-0.225  
19,15.576,rs4806985,-0.227  
19,15.622,rs1610093,-0.218  
19,15.625,rs10409783,-0.218  
19,15.637,rs16992439,-0.218  
19,15.637,rs7249087,-0.218  
19,15.757,rs7255247,-0.218  
19,15.883,rs11880374,-0.217  
19,15.896,rs9917028,-0.217  
19,16.129,rs7251000,-0.200  
19,16.302,rs879564,-0.234  
19,16.347,rs11085096,-0.232  
19,16.470,rs4807650,-0.220  
19,16.532,rs2779180,-0.189  
19,16.567,rs1055919,-0.167  
19,16.642,rs8105711,-0.168  
19,16.690,rs2656938,-0.192  
19,16.739,rs4807664,-0.211  
19,16.811,rs262566,-0.264  
19,16.834,rs2250978,-0.263  
19,16.854,rs2307204,-0.263  
19,17.135,rs2613766,-0.255  
19,17.440,rs2620812,-0.206  
19,17.557,rs2379609,-0.272  
19,17.583,rs10415488,-0.276  
19,17.600,rs886936,-0.281  
19,17.612,rs4807016,-0.285  
19,17.753,rs1558138,-0.340  
19,17.778,rs3948683,-0.350  
19,17.779,rs16992922,-0.352  
19,17.824,rs1207118,-0.391  
19,17.850,rs875552,-0.399  
19,17.863,rs2082465,-0.410  
19,17.908,rs8105522,-0.415  
19,17.940,rs4807030,-0.372  
19,18.006,rs6510851,-0.380  
19,18.024,rs1384936,-0.384  
19,18.031,rs8111234,-0.385  
19,18.104,rs8107825,-0.358  
19,18.139,rs668692,-0.362  
19,18.163,rs797544,-0.378  
19,18.252,rs675136,-0.456  
19,18.270,rs385839,-0.475  
19,18.369,rs2288947,-0.504  
19,18.379,rs8105637,-0.506

19,18.482,rs806705,-0.525  
19,18.740,rs2436508,-0.506  
19,18.924,rs3826798,-0.512  
19,18.962,rs6510857,-0.504  
19,19.042,rs778805,-0.482  
19,19.061,rs3760776,-0.485  
19,19.125,rs10426709,-0.521  
19,19.131,rs778972,-0.525  
19,19.220,rs8108064,-0.504  
19,19.319,rs7258475,-0.483  
19,19.374,rs628271,-0.470  
19,19.439,rs731773,-0.454  
19,19.470,rs530942,-0.480  
19,19.545,rs673153,-0.503  
19,19.687,rs9304930,-0.506  
19,19.867,rs2335629,-0.504  
19,20.128,rs1560694,-0.467  
19,20.196,rs8182608,-0.476  
19,20.278,rs4807078,-0.479  
19,20.305,rs872664,-0.468  
19,20.884,rs348365,-0.417  
19,20.903,rs8111177,-0.414  
19,20.952,rs1663803,-0.436  
19,20.997,rs3852883,-0.456  
19,21.023,rs371164,-0.451  
19,21.254,rs348374,-0.324  
19,21.292,rs422981,-0.348  
19,21.323,rs348347,-0.330  
19,21.363,rs1115478,-0.334  
19,21.419,rs344587,-0.333  
19,21.429,rs344589,-0.331  
19,21.431,rs17703895,-0.331  
19,21.504,rs344580,-0.339  
19,21.621,rs12462065,-0.370  
19,21.625,rs426374,-0.371  
19,21.638,rs447135,-0.374  
19,21.729,rs344560,-0.353  
19,21.744,rs1077667,-0.350  
19,21.775,rs379527,-0.345  
19,21.891,rs11672613,-0.319  
19,21.944,rs2250656,-0.307  
19,22.042,rs339408,-0.327  
19,22.051,rs339404,-0.330  
19,22.091,rs2305806,-0.324  
19,22.115,rs7258236,-0.306  
19,22.168,rs682626,-0.298  
19,22.202,rs568259,-0.315  
19,22.213,rs6510922,-0.320  
19,22.258,rs2660489,-0.341  
19,22.307,rs12610223,-0.343  
19,22.337,rs4807101,-0.321  
19,22.362,rs347033,-0.360  
19,22.400,rs3786688,-0.406  
19,22.405,rs11668094,-0.403  
19,22.467,rs331679,-0.335  
19,22.659,rs330876,-0.302  
19,22.788,rs3895916,-0.262  
19,22.950,rs625183,-0.188  
19,23.005,rs2035970,-0.198  
19,23.080,rs11665875,-0.195  
19,23.356,rs2352958,-0.212

19,23.369,rs2913877,-0.214  
19,23.417,rs2967657,-0.214  
19,23.444,rs1864193,-0.213  
19,23.448,rs3745550,-0.214  
19,23.503,rs11672739,-0.205  
19,23.503,rs6510949,-0.205  
19,23.525,rs2229431,-0.208  
19,23.536,rs8103483,-0.210  
19,23.610,rs7251963,-0.222  
19,23.666,rs2860183,-0.231  
19,23.765,rs7508679,-0.246  
19,23.815,rs3852876,-0.236  
19,23.930,rs7254921,-0.190  
19,24.070,rs11879985,-0.137  
19,24.083,rs4804602,-0.133  
19,24.224,rs11880140,-0.108  
19,24.266,rs3745356,-0.108  
19,24.291,rs1363938,-0.100  
19,24.349,rs661821,-0.102  
19,24.412,rs591040,-0.090  
19,24.465,rs577029,-0.077  
19,24.492,rs10418152,-0.077  
19,24.496,rs7260296,-0.061  
19,24.653,rs794084,-0.049  
19,24.772,rs3745367,-0.054  
19,24.848,rs2277989,-0.058  
19,24.854,rs10415518,-0.064  
19,24.860,rs1990975,-0.070  
19,24.902,rs10518270,-0.084  
19,24.936,rs1010047,-0.078  
19,24.974,rs7248637,-0.069  
19,24.997,rs11881682,-0.062  
19,25.030,rs7252764,-0.048  
19,25.058,rs608773,-0.038  
19,25.084,rs10906990,-0.035  
19,25.234,rs652260,-0.047  
19,25.334,rs525420,-0.033  
19,25.430,rs4804833,-0.033  
19,25.545,rs7252142,-0.019  
19,25.808,rs6603134,-0.026  
19,25.825,rs4804252,-0.026  
19,25.834,rs1104768,-0.026  
19,25.925,rs17160149,-0.023  
19,25.956,rs7245429,-0.022  
19,26.031,rs4527136,-0.017  
19,26.072,rs8112525,-0.016  
19,26.087,rs12162233,-0.016  
19,26.160,rs10416763,-0.023  
19,26.187,rs8112582,-0.024  
19,26.343,rs2967625,-0.024  
19,26.371,rs11666971,-0.026  
19,26.417,rs36253,-0.029  
19,26.422,rs36259,-0.030  
19,26.443,rs250508,-0.019  
19,26.447,rs7250584,-0.019  
19,26.589,rs2241590,-0.002  
19,26.714,rs2278236,-0.001  
19,26.788,rs2967614,-0.001  
19,27.053,rs7507526,-0.003  
19,27.145,rs1054623,-0.003  
19,27.278,rs11672367,-0.001

19,27.384,rs7249094,-0.001  
19,27.575,rs7254400,-0.000  
19,27.604,rs1561406,-0.000  
19,27.681,rs4804075,0.000  
19,27.711,rs2967674,0.000  
19,28.118,rs1423049,-0.001  
19,28.169,rs2972588,-0.001  
19,28.335,rs10854117,-0.005  
19,28.352,rs881877,-0.004  
19,28.372,rs7260214,-0.005  
19,28.419,rs12984694,-0.007  
19,28.514,rs10417520,-0.013  
19,28.543,rs4804394,-0.024  
19,28.631,rs11670174,-0.023  
19,28.714,rs8110010,-0.014  
19,28.725,rs1036224,-0.013  
19,28.769,rs2033483,-0.007  
19,28.787,rs8112516,-0.005  
19,28.845,rs7254803,-0.004  
19,29.006,rs10418968,-0.003  
19,29.016,rs12975784,-0.003  
19,29.100,rs17265036,-0.002  
19,29.360,rs10854157,-0.002  
19,29.721,rs10500208,-0.005  
19,29.969,rs2081066,-0.018  
19,30.104,rs9304984,-0.026  
19,30.110,rs8113425,-0.026  
19,30.197,rs6511284,-0.025  
19,30.206,rs8100015,-0.023  
19,30.247,rs10406152,-0.018  
19,30.299,rs2287807,-0.012  
19,30.328,rs2287802,-0.013  
19,30.343,rs889125,-0.014  
19,30.351,rs3786701,-0.009  
19,30.360,rs1644733,-0.015  
19,30.372,rs2431820,-0.015  
19,30.376,rs10401453,-0.014  
19,30.414,rs11883054,-0.013  
19,30.458,rs897803,-0.013  
19,30.494,rs1979262,-0.015  
19,30.503,rs15723,-0.015  
19,30.628,rs2228611,-0.013  
19,30.756,rs10409243,-0.009  
19,30.824,rs8111930,-0.011  
19,30.877,rs5498,-0.012  
19,30.879,rs3093032,-0.012  
19,30.916,rs2291473,-0.010  
19,30.973,rs2278442,-0.008  
19,30.982,rs7258015,-0.008  
19,31.061,rs280500,-0.008  
19,31.209,rs7256672,-0.010  
19,31.286,rs3745249,-0.012  
19,31.550,rs1541596,-0.021  
19,31.581,rs1529711,-0.021  
19,31.636,rs12459603,-0.019  
19,31.658,rs13345127,-0.018  
19,31.698,rs1529729,-0.016  
19,31.724,rs11668477,-0.016  
19,31.782,rs892115,-0.013  
19,31.791,rs7188,-0.009  
19,31.799,rs4804149,-0.006



19,31.799,rs379309,-0.006  
19,31.817,rs754528,-0.008  
19,31.918,rs322141,-0.020  
19,31.924,rs7417,-0.019  
19,31.951,rs7251786,-0.017  
19,31.958,rs8108707,-0.016  
19,31.987,rs2291516,-0.017  
19,32.126,rs12984574,-0.015  
19,32.146,rs889366,-0.015  
19,32.212,rs13345223,-0.012  
19,32.221,rs7255420,-0.013  
19,32.269,rs893546,-0.018  
19,32.269,rs17638694,-0.018  
19,32.327,rs11880217,-0.013  
19,32.354,rs17706051,-0.011  
19,32.358,rs11666071,-0.011  
19,32.373,rs12981699,-0.012  
19,32.466,rs11881952,-0.010  
19,32.517,rs8102143,-0.010  
19,32.762,rs722571,-0.009  
19,33.069,rs11085825,-0.013  
19,33.088,rs11667458,-0.012  
19,33.113,rs8107173,-0.011  
19,33.245,rs7250834,-0.007  
19,33.249,rs8103241,-0.007  
19,33.521,rs892020,-0.018  
19,33.551,rs8109821,-0.022  
19,33.554,rs8113706,-0.022  
19,33.556,rs10854122,-0.022  
19,33.660,rs3816027,-0.035  
19,33.744,rs7251403,-0.036  
19,33.758,rs4926249,-0.038  
19,33.797,rs12608501,-0.037  
19,33.826,rs4499352,-0.036  
19,33.872,rs8101955,-0.036  
19,33.899,rs7256928,-0.036  
19,33.925,rs4926278,-0.054  
19,34.062,rs4926285,-0.062  
19,34.149,rs1363345,-0.064  
19,34.153,rs4926290,-0.064  
19,34.163,rs11879128,-0.085  
19,34.185,rs1862260,-0.065  
19,34.283,rs16979195,-0.037  
19,34.316,rs10414182,-0.036  
19,34.391,rs11668370,-0.038  
19,34.529,rs10416242,-0.046  
19,34.733,rs346144,-0.032  
19,34.858,rs346155,-0.006  
19,34.881,rs416162,-0.004  
19,34.924,rs2607272,-0.002  
19,34.985,rs3745454,-0.001  
19,35.079,rs8107465,-0.001  
19,35.235,rs2305777,-0.001  
19,35.248,rs2305778,-0.001  
19,35.250,rs2305779,-0.001  
19,35.300,rs1056143,-0.001  
19,35.538,rs2306190,-0.004  
19,35.619,rs8100676,-0.005  
19,35.743,rs10421422,-0.010  
19,35.971,rs12151240,-0.003  
19,36.000,rs4528684,-0.002

19,36.081,rs498284,-0.001  
19,36.096,rs492049,-0.004  
19,36.160,rs888876,-0.001  
19,36.350,rs9917042,-0.001  
19,36.366,rs4517893,-0.001  
19,36.370,rs2230748,-0.002  
19,36.381,rs3815716,-0.002  
19,36.411,rs7258844,-0.002  
19,36.438,rs4926214,-0.002  
19,36.481,rs4926221,0.001  
19,36.527,rs7252966,0.003  
19,36.537,rs8104167,0.003  
19,36.584,rs11878770,0.001  
19,36.623,rs726788,0.004  
19,36.632,rs8113491,0.004  
19,36.728,rs2524363,0.001  
19,36.809,rs3965461,0.002  
19,36.828,rs8107904,-0.000  
19,36.937,rs8100775,-0.002  
19,37.046,rs3752192,-0.001  
19,37.131,rs8108703,-0.002  
19,37.155,rs11085914,-0.002  
19,37.206,rs10421024,-0.003  
19,37.296,rs4569396,-0.005  
19,37.374,rs7250965,-0.006  
19,37.406,rs715159,-0.007  
19,37.669,rs11085928,-0.005  
19,37.708,rs7252267,-0.003  
19,37.717,rs10402035,-0.006  
19,37.799,rs6512003,-0.001  
19,37.864,rs714920,-0.000  
19,37.935,rs8105737,-0.000  
19,37.953,rs7251788,-0.000  
19,37.974,rs2074265,-0.000  
19,38.002,rs1114312,-0.000  
19,38.043,rs2074616,-0.000  
19,38.068,rs7258642,-0.000  
19,38.107,rs4808272,-0.000  
19,38.332,rs8102864,-0.008  
19,38.351,rs4809198,-0.008  
19,38.363,rs4310987,-0.011  
19,38.365,rs6512044,-0.011  
19,38.379,rs17722016,-0.011  
19,38.406,rs665586,-0.010  
19,38.432,rs4646522,-0.009  
19,38.433,rs7254518,-0.009  
19,38.480,rs4808358,-0.010  
19,38.627,rs8102407,-0.002  
19,38.796,rs4808416,-0.001  
19,38.801,rs1594688,-0.001  
19,38.935,rs7251800,-0.001  
19,38.955,rs6512081,-0.001  
19,39.070,rs4808019,-0.000  
19,39.158,rs8110325,0.006  
19,39.159,rs998316,0.006  
19,39.205,rs16981095,0.034  
19,39.217,rs17708984,0.043  
19,39.330,rs2241400,0.062  
19,39.334,rs1043346,0.062  
19,39.341,rs10406557,0.061  
19,39.408,rs12461400,0.057

19,39.499,rs3855681,0.052  
19,39.528,rs501537,0.051  
19,39.739,rs7259026,0.026  
19,39.763,rs12461136,0.025  
19,39.821,rs754292,0.022  
19,39.842,rs11672396,0.022  
19,39.882,rs4808051,0.022  
19,40.019,rs7247204,0.021  
19,40.050,rs878506,0.022  
19,40.071,rs812847,0.014  
19,40.129,rs773845,0.020  
19,40.605,rs8108315,0.011  
19,40.700,rs2227356,0.009  
19,40.790,rs8102899,0.006  
19,40.798,rs11086039,0.005  
19,40.917,rs8111257,0.004  
19,41.106,rs2353203,0.000  
19,41.109,rs8101816,0.000  
19,41.160,rs8112434,-0.000  
19,41.161,rs2168632,-0.000  
19,41.179,rs6512158,-0.000  
19,41.196,rs8106270,-0.000  
19,41.269,rs873513,-0.000  
19,41.322,rs2305758,-0.000  
19,41.340,rs10469470,0.000  
19,41.385,rs4808629,0.000  
19,41.657,rs1035872,-0.001  
19,41.933,rs11666579,-0.002  
19,42.211,rs2375592,-0.002  
19,42.455,rs7246258,-0.004  
19,42.626,rs7249148,-0.005  
19,42.636,rs10422926,-0.005  
19,42.709,rs3746200,-0.011  
19,42.711,rs3746199,-0.011  
19,42.727,rs7250113,-0.013  
19,42.949,rs11879994,-0.020  
19,42.965,rs12608932,-0.020  
19,43.017,rs6512205,-0.023  
19,43.097,rs12978632,-0.027  
19,43.153,rs6512211,-0.029  
19,43.198,rs10419687,-0.034  
19,43.283,rs12978218,-0.037  
19,43.444,rs11673001,-0.038  
19,43.822,rs13345379,-0.032  
19,43.900,rs17654456,-0.017  
19,43.916,rs265548,-0.033  
19,44.073,rs11086080,-0.033  
19,44.168,rs3212701,-0.061  
19,44.168,rs2110586,-0.061  
19,44.259,rs6512236,-0.061  
19,44.346,rs7252014,-0.035  
19,44.414,rs17654580,-0.038  
19,44.432,rs91710,-0.034  
19,44.454,rs12973060,-0.031  
19,44.470,rs434815,-0.033  
19,44.584,rs3746188,-0.061  
19,44.644,rs7125,-0.078  
19,44.773,rs1469023,-0.087  
19,44.798,rs4254438,-0.090  
19,44.861,rs12985909,-0.087  
19,44.877,rs1978423,-0.087

19,44.912,rs3746183,-0.092  
19,44.919,rs749451,-0.091  
19,44.943,rs8101804,-0.086  
19,45.045,rs731945,-0.072  
19,45.092,rs7251067,-0.066  
19,45.208,rs3761034,-0.066  
19,45.352,rs3795027,-0.066  
19,45.352,rs3795028,-0.066  
19,45.409,rs757318,-0.066  
19,45.467,rs2240887,-0.068  
19,45.513,rs10038,-0.070  
19,45.546,rs2313048,-0.076  
19,45.564,rs8104653,-0.079  
19,45.699,rs10403594,-0.072  
19,45.715,rs2301661,-0.074  
19,45.930,rs964132,-0.086  
19,45.933,rs3746259,-0.086  
19,45.956,rs7257072,-0.085  
19,45.993,rs1050483,-0.084  
19,46.369,rs892023,-0.090  
19,46.399,rs7252981,-0.094  
19,46.501,rs2304130,-0.125  
19,46.507,rs7247433,-0.127  
19,46.562,rs8110890,-0.129  
19,46.563,rs247767,-0.129  
19,46.577,rs247789,-0.127  
19,46.594,rs8110431,-0.124  
19,46.600,rs248943,-0.123  
19,46.784,rs12460082,-0.104  
19,46.852,rs2335887,-0.098  
19,47.026,rs11673382,-0.103  
19,47.049,rs11878327,-0.105  
19,47.165,rs2078584,-0.113  
19,47.175,rs10425466,-0.116  
19,47.242,rs6511099,-0.136  
19,47.460,rs7254995,-0.210  
19,47.463,rs1862466,-0.210  
19,47.513,rs8101643,-0.198  
19,47.608,rs7252706,-0.149  
19,47.622,rs2015481,-0.137  
19,47.663,rs2435039,-0.097  
19,47.679,rs10424424,-0.101  
19,47.680,rs1965611,-0.101  
19,47.761,rs2957807,-0.115  
19,47.762,rs8101792,-0.116  
19,47.767,rs4932769,-0.097  
19,47.771,rs7245541,-0.113  
19,47.791,rs12980509,-0.096  
19,47.793,rs7252224,-0.096  
19,47.823,rs11668225,-0.090  
19,47.837,rs7246878,-0.087  
19,47.846,rs376789,-0.076  
19,47.871,rs13346109,-0.073  
19,47.877,rs2099351,-0.072  
19,47.919,rs2195987,-0.062  
19,48.370,rs7255207,-0.047  
19,48.371,rs811020,-0.047  
19,48.377,rs2190803,-0.047  
19,48.381,rs7248185,-0.043  
19,48.386,rs10409248,-0.040  
19,48.388,rs16970394,-0.040

19,48.390,rs7250467,-0.040  
19,48.392,rs9973221,-0.042  
19,48.393,rs11669016,-0.044  
19,48.394,rs10500233,-0.046  
19,48.395,rs17714483,-0.046  
19,48.411,rs1840812,-0.049  
19,48.416,rs12460063,-0.052  
19,48.420,rs736286,-0.060  
19,48.425,rs10414856,-0.073  
19,48.428,rs4806416,-0.075  
19,48.430,rs7246810,-0.076  
19,48.472,rs16962149,-0.091  
19,48.474,rs7249269,-0.092  
19,48.476,rs4805292,-0.089  
19,48.480,rs4805303,-0.073  
19,48.495,rs10516718,-0.063  
19,48.497,rs6509228,-0.056  
19,48.498,rs2278441,-0.053  
19,48.504,rs10424053,-0.066  
19,48.508,rs13382050,-0.067  
19,48.515,rs11666812,-0.088  
19,48.519,rs7408479,-0.101  
19,48.520,rs8102600,-0.107  
19,48.528,rs1558363,-0.161  
19,48.529,rs740880,-0.141  
19,48.533,rs892074,-0.138  
19,48.534,rs10412776,-0.139  
19,48.536,rs12982054,-0.136  
19,48.540,rs2195954,-0.140  
19,48.541,rs12461407,-0.142  
19,48.543,rs2082455,-0.145  
19,48.546,rs892071,-0.187  
19,48.546,rs734837,-0.195  
19,48.550,rs8106720,-0.221  
19,48.553,rs10411749,-0.224  
19,48.554,rs1035936,-0.255  
19,48.563,rs9566,-0.245  
19,48.566,rs16963209,-0.239  
19,48.578,rs4805487,-0.225  
19,48.581,rs4805495,-0.220  
19,48.582,rs4805496,-0.218  
19,48.587,rs2080887,-0.200  
19,48.593,rs11668282,-0.193  
19,48.603,rs9304767,-0.235  
19,48.605,rs2903361,-0.244  
19,48.605,rs399246,-0.248  
19,48.607,rs335776,-0.272  
19,48.620,rs758326,-0.233  
19,48.621,rs4805532,-0.203  
19,48.626,rs16964067,-0.196  
19,48.630,rs4804925,-0.197  
19,48.633,rs6510150,-0.197  
19,48.636,rs7247350,-0.180  
19,48.639,rs1433071,-0.185  
19,48.641,rs8112477,-0.178  
19,48.645,rs3786804,-0.167  
19,48.654,rs4805579,-0.140  
19,48.655,rs10424191,-0.151  
19,48.658,rs2060241,-0.150  
19,48.662,rs16964473,-0.163  
19,48.666,rs12460988,-0.178

19,48.667,rs7258628,-0.180  
19,48.670,rs4805602,-0.194  
19,48.673,rs1184398,-0.201  
19,48.681,rs10414458,-0.242  
19,48.683,rs4341857,-0.251  
19,48.684,rs735757,-0.255  
19,48.688,rs4548998,-0.246  
19,48.700,rs276767,-0.265  
19,48.712,rs10500250,-0.278  
19,48.720,rs8102512,-0.274  
19,48.733,rs16965432,-0.250  
19,48.734,rs10412617,-0.248  
19,48.734,rs4804960,-0.247  
19,48.736,rs10425645,-0.241  
19,48.737,rs1039106,-0.237  
19,48.747,rs10420013,-0.246  
19,48.751,rs10421853,-0.243  
19,48.757,rs11084588,-0.240  
19,48.758,rs7247652,-0.240  
19,48.761,rs11672575,-0.240  
19,48.769,rs8112540,-0.262  
19,48.772,rs17501293,-0.248  
19,48.779,rs892037,-0.228  
19,48.779,rs17593731,-0.228  
19,48.780,rs370138,-0.228  
19,48.795,rs1865055,-0.217  
19,48.802,rs10407246,-0.235  
19,48.802,rs11084608,-0.237  
19,48.803,rs12982128,-0.236  
19,48.804,rs2075411,-0.232  
19,48.810,rs8102897,-0.177  
19,48.820,rs12610340,-0.120  
19,48.823,rs8103440,-0.120  
19,48.827,rs8101952,-0.119  
19,48.829,rs758638,-0.116  
19,48.839,rs1468918,-0.119  
19,48.842,rs8105931,-0.117  
19,48.848,rs7252763,-0.117  
19,48.849,rs718384,-0.116  
19,48.857,rs9304836,-0.111  
19,48.874,rs2059058,-0.096  
19,48.877,rs17692472,-0.093  
19,48.879,rs7251512,-0.092  
19,48.899,rs2868145,-0.084  
19,48.937,rs2287669,-0.081  
19,48.965,rs10422710,-0.083  
19,49.060,rs1035478,-0.087  
19,49.075,rs745961,-0.090  
19,49.111,rs751731,-0.093  
19,49.126,rs10410414,-0.090  
19,49.187,rs8113143,-0.082  
19,49.215,rs17694094,-0.098  
19,49.219,rs748680,-0.096  
19,49.228,rs736289,-0.077  
19,49.231,rs889108,-0.076  
19,49.236,rs1990966,-0.075  
19,49.237,rs7259974,-0.077  
19,49.238,rs11084724,-0.077  
19,49.316,rs10425678,-0.106  
19,49.329,rs33840,-0.117  
19,49.343,rs1864131,-0.128

19,49.351,rs12979271,-0.118  
19,49.371,rs8112967,-0.067  
19,49.377,rs16968313,-0.067  
19,49.380,rs1035937,-0.069  
19,49.385,rs1469108,-0.061  
19,49.390,rs16968366,-0.064  
19,49.397,rs16968399,-0.065  
19,49.397,rs10419302,-0.081  
19,49.416,rs206042,-0.076  
19,49.417,rs17325358,-0.075  
19,49.422,rs10520203,-0.070  
19,49.423,rs284687,-0.067  
19,49.442,rs16968492,-0.039  
19,49.442,rs11673608,-0.039  
19,49.443,rs17247661,-0.039  
19,49.461,rs11672221,-0.023  
19,49.465,rs256335,-0.021  
19,49.474,rs1006359,-0.021  
19,49.484,rs2112507,-0.021  
19,49.490,rs12975931,-0.024  
19,49.504,rs10422153,-0.042  
19,49.765,rs7245865,-0.032  
19,50.119,rs244772,-0.020  
19,50.186,rs2121139,-0.024  
19,50.208,rs554438,-0.025  
19,50.587,rs11671685,-0.031  
19,50.621,rs1862491,-0.035  
19,50.687,rs10500272,-0.045  
19,50.728,rs2199640,-0.051  
19,50.853,rs11084777,-0.035  
19,51.071,rs10409480,-0.043  
19,51.110,rs3746236,-0.042  
19,51.177,rs8106116,-0.036  
19,51.234,rs2651090,-0.030  
19,51.437,rs295771,-0.011  
19,51.460,rs2290642,-0.013  
19,51.478,rs870379,-0.014  
19,51.508,rs12151195,-0.010  
19,51.540,rs1687982,-0.007  
19,51.562,rs7250814,-0.013  
19,51.642,rs3761072,-0.016  
19,51.651,rs1672989,-0.016  
19,51.660,rs2290650,-0.016  
19,51.898,rs1633921,-0.008  
19,52.128,rs7251432,0.000  
19,52.143,rs10402233,0.000  
19,52.160,rs2301600,-0.000  
19,52.190,rs9304870,-0.000  
19,52.288,rs2239511,0.000  
19,52.305,rs12985354,0.000  
19,52.314,rs16970264,0.000  
19,52.329,rs387083,0.000  
19,52.374,rs16970276,0.001  
19,52.429,rs16970293,0.007  
19,52.473,rs4806155,0.010  
19,52.485,rs7252554,0.010  
19,52.502,rs8101851,0.005  
19,52.587,rs10407971,0.000  
19,52.610,rs2293695,0.000  
19,52.635,rs7247001,0.000  
19,52.635,rs12460932,0.000

19,52.641,rs4805127,0.000  
19,52.659,rs2285513,0.001  
19,52.688,rs11882238,0.002  
19,52.719,rs12609727,0.002  
19,52.737,rs11882733,0.002  
19,52.763,rs8112614,0.002  
19,52.934,rs10422762,0.004  
19,53.181,rs11881242,0.001  
19,53.194,rs3761097,0.002  
19,53.202,rs401522,0.002  
19,53.203,rs11671781,0.003  
19,53.230,rs12610011,0.002  
19,53.260,rs10409299,0.001  
19,53.523,rs8105993,0.001  
19,53.539,rs1005194,0.001  
19,53.676,rs1009381,0.000  
19,53.747,rs1016994,0.001  
19,53.765,rs7250473,0.001  
19,53.827,rs10410162,0.001  
19,53.922,rs2972527,0.001  
19,54.494,rs7259256,0.000  
19,54.675,rs3108582,-0.000  
19,55.076,rs1035441,-0.000  
19,55.125,rs10403877,-0.001  
19,55.551,rs16972024,-0.002  
19,55.973,rs11666245,-0.006  
19,55.996,rs241951,-0.006  
19,56.009,rs3910952,-0.006  
19,56.114,rs10422365,-0.001  
19,56.159,rs7249265,-0.000  
19,56.174,rs1725489,-0.001  
19,56.558,rs7253473,-0.001  
19,56.726,rs8101725,-0.000  
19,57.057,rs12609878,0.002  
19,57.123,rs8103619,0.002  
19,57.233,rs10409638,0.001  
19,57.308,rs3786829,0.001  
19,57.613,rs973009,0.003  
19,57.644,rs4802747,0.004  
19,57.887,rs7248208,0.006  
19,58.005,rs11879029,0.004  
19,58.016,rs10410544,0.003  
19,58.289,rs10417436,0.001  
19,58.616,rs11882959,-0.002  
19,58.697,rs8109886,-0.004  
19,58.700,rs16973285,-0.004  
19,58.765,rs503355,-0.004  
19,58.841,rs251896,-0.005  
19,58.969,rs11665711,-0.003  
19,59.004,rs16973403,-0.003  
19,59.016,rs2277743,-0.003  
19,59.041,rs31726,-0.002  
19,59.322,rs4803254,-0.000  
19,59.500,rs1433110,0.000  
19,59.724,rs2270028,0.000  
19,59.839,rs12463334,0.000  
19,59.854,rs1126159,0.000  
19,60.386,rs978671,-0.000  
19,60.520,rs10426810,-0.001  
19,60.548,rs12463156,-0.001  
19,60.579,rs12162264,-0.001



19,60.985,rs12975624,-0.005  
19,61.016,rs7252868,-0.005  
19,61.155,rs10401972,-0.009  
19,61.259,rs234368,-0.006  
19,61.480,rs337799,-0.003  
19,61.712,rs892117,-0.003  
19,61.746,rs2304185,-0.003  
19,61.751,rs874269,-0.003  
19,62.172,rs268691,-0.010  
19,62.243,rs10401458,-0.008  
19,62.314,rs10413521,-0.023  
19,62.415,rs1165838,-0.034  
19,62.532,rs7254268,-0.052  
19,62.542,rs2561563,-0.054  
19,62.609,rs3865452,-0.060  
19,62.680,rs2607426,-0.072  
19,62.711,rs7937,-0.076  
19,62.714,rs11881124,-0.076  
19,62.811,rs10521014,-0.081  
19,62.812,rs5007415,-0.082  
19,62.964,rs11666982,-0.092  
19,62.996,rs7254075,-0.095  
19,63.005,rs10513606,-0.095  
19,63.042,rs1709084,-0.096  
19,63.081,rs10426454,-0.093  
19,63.115,rs1645685,-0.102  
19,63.151,rs338600,-0.076  
19,63.168,rs168109,-0.054  
19,63.188,rs4803449,-0.049  
19,63.277,rs2217656,-0.031  
19,63.297,rs10417924,-0.028  
19,63.318,rs4803455,-0.023  
19,63.368,rs12610088,-0.023  
19,63.388,rs2215324,-0.017  
19,63.394,rs2109075,-0.010  
19,63.403,rs7251044,-0.010  
19,63.404,rs3928916,-0.010  
19,63.417,rs10413359,-0.019  
19,63.465,rs8099939,-0.031  
19,63.485,rs10421547,-0.026  
19,63.493,rs12610309,-0.023  
19,63.558,rs16975865,-0.022  
19,64.120,rs1859406,-0.001  
19,64.213,rs3213287,0.000  
19,64.284,rs8113762,0.001  
19,64.372,rs3046,0.001  
19,64.467,rs2302524,0.001  
19,64.486,rs2239372,0.000  
19,64.504,rs344783,0.001  
19,64.528,rs436681,0.000  
19,64.576,rs10403459,-0.000  
19,64.593,rs346049,-0.000  
19,64.688,rs1469711,-0.000  
19,64.739,rs187008,0.000  
19,64.938,rs399098,0.000  
19,65.323,rs1236711,0.007  
19,65.463,rs16978840,0.008  
19,65.702,rs7251134,0.008  
19,65.884,rs204534,0.004  
19,65.982,rs1004605,0.004  
19,65.999,rs7260180,0.002

19,66.011,rs1727731,0.001  
19,66.017,rs17714646,0.001  
19,66.022,rs1661178,0.001  
19,66.025,rs1727748,0.001  
19,66.097,rs17801106,0.000  
19,66.134,rs2357107,0.000  
19,66.207,rs2965155,0.000  
19,66.236,rs10421830,0.000  
19,66.271,rs2965101,-0.000  
19,66.280,rs2965174,-0.000  
19,66.375,rs2968180,0.000  
19,66.444,rs4803766,0.005  
19,66.455,rs11667640,0.014  
19,66.464,rs2075650,0.023  
19,66.468,rs405509,0.023  
19,66.483,rs3760627,0.010  
19,66.514,rs10416445,0.011  
19,66.525,rs1469704,0.011  
19,66.540,rs10425074,0.012  
19,66.556,rs12460985,0.013  
19,66.562,rs2627641,0.014  
19,66.567,rs10422797,0.014  
19,66.580,rs10445572,0.013  
19,66.604,rs454421,0.010  
19,66.610,rs50871,0.016  
19,66.629,rs11615,0.024  
19,66.659,rs8099878,0.030  
19,66.664,rs16979873,0.030  
19,66.677,rs7256951,0.021  
19,66.702,rs10405576,0.018  
19,66.734,rs2334253,0.008  
19,66.786,rs2286756,0.004  
19,66.849,rs11672660,0.002  
19,66.860,rs2334255,0.002  
19,66.904,rs11668847,0.001  
19,66.991,rs10418603,0.000  
19,67.209,rs16980051,0.000  
19,67.348,rs12460033,0.003  
19,67.405,rs10500293,0.004  
19,67.450,rs11672738,0.006  
19,67.481,rs11667587,0.007  
19,67.584,rs8102495,0.014  
19,67.621,rs2072561,0.013  
19,67.650,rs2007332,0.013  
19,67.700,rs8111075,0.012  
19,67.962,rs10439109,0.062  
19,68.155,rs10406931,0.090  
19,68.172,rs7259453,0.092  
19,68.176,rs4803913,0.090  
19,68.208,rs10153462,0.074  
19,68.248,rs3826795,0.084  
19,68.286,rs887946,0.092  
19,68.376,rs11670522,0.087  
19,68.390,rs12459321,0.083  
19,68.394,rs10412551,0.082  
19,68.439,rs2288913,0.067  
19,68.472,rs8102503,0.054  
19,68.481,rs8111536,0.050  
19,68.482,rs1975189,0.050  
19,68.522,rs10113,0.033  
19,68.541,rs931647,0.020

19,68.557,rs314669,0.015  
19,68.634,rs8105903,0.017  
19,68.657,rs6509294,0.015  
19,68.669,rs312185,0.014  
19,68.765,rs10425259,0.041  
19,68.780,rs11083855,0.048  
19,68.802,rs1862499,0.062  
19,68.885,rs10424953,0.068  
19,68.894,rs4804036,0.079  
19,68.898,rs7250152,0.074  
19,68.906,rs8112962,0.079  
19,68.907,rs10426874,0.078  
19,68.910,rs2252532,0.091  
19,68.918,rs12976740,0.072  
19,68.922,rs830145,0.086  
19,68.927,rs17271418,0.083  
19,68.940,rs2974216,0.074  
19,68.958,rs10412317,0.058  
19,68.961,rs9304671,0.057  
19,68.965,rs16982092,0.068  
19,68.966,rs12985868,0.070  
19,69.004,rs2303690,0.087  
19,69.019,rs1171099,0.092  
19,69.066,rs2386983,0.102  
19,69.117,rs1366442,0.131  
19,69.120,rs11564620,0.120  
19,69.191,rs156631,0.166  
19,69.198,rs11564538,0.166  
19,69.329,rs3730913,0.157  
19,69.422,rs972800,0.154  
19,69.479,rs1062808,0.149  
19,69.494,rs1966625,0.150  
19,69.926,rs1504520,0.198  
19,70.068,rs8182501,0.221  
19,70.215,rs275837,0.232  
19,70.519,rs1799270,0.164  
19,70.530,rs11083939,0.161  
19,70.531,rs12460535,0.161  
19,70.579,rs11880333,0.157  
19,70.644,rs504963,0.153  
19,70.715,rs8111317,0.223  
19,70.717,rs599951,0.231  
19,70.723,rs492734,0.252  
19,70.732,rs12974796,0.285  
19,70.759,rs2098684,0.283  
19,70.822,rs4802517,0.249  
19,70.841,rs2270943,0.239  
19,70.857,rs746075,0.231  
19,70.873,rs4801783,0.222  
19,70.897,rs11667229,0.212  
19,70.949,rs3764622,0.191  
19,70.960,rs7256033,0.188  
19,71.008,rs11669977,0.160  
19,71.015,rs17206784,0.154  
19,71.051,rs734570,0.143  
19,71.104,rs3745298,0.126  
19,71.122,rs2287923,0.117  
19,71.176,rs3848549,0.091  
19,71.212,rs8111390,0.090  
19,71.351,rs10405154,0.078  
19,71.400,rs2293011,0.066

19,71.511,rs13346402,0.079  
19,71.591,rs11880923,0.090  
19,71.696,rs3745469,0.082  
19,71.719,rs10415880,0.081  
19,71.796,rs12609870,0.066  
19,71.825,rs6509443,0.060  
19,71.832,rs2304202,0.058  
19,71.876,rs1674139,0.049  
19,71.987,rs1290650,0.051  
19,72.039,rs16981486,0.051  
19,72.123,rs4801810,0.052  
19,72.162,rs1152237,0.053  
19,72.189,rs283526,0.053  
19,72.357,rs734910,0.047  
19,72.358,rs3745495,0.047  
19,72.362,rs245110,0.048  
19,72.488,rs4280362,0.057  
19,72.516,rs6509454,0.061  
19,72.533,rs638286,0.064  
19,72.562,rs12608568,0.064  
19,72.617,rs630283,0.077  
19,72.673,rs3745504,0.082  
19,72.682,rs1651543,0.083  
19,72.688,rs788338,0.083  
19,72.702,rs667907,0.085  
19,72.752,rs7251148,0.088  
19,72.909,rs1405655,0.096  
19,73.002,rs3745516,0.115  
19,73.023,rs3816551,0.123  
19,73.112,rs1620498,0.142  
19,73.213,rs1150922,0.144  
19,73.221,rs1862479,0.146  
19,73.244,rs6509477,0.121  
19,73.293,rs2098683,0.106  
19,73.314,rs1978454,0.108  
19,73.348,rs6509485,0.116  
19,73.377,rs2042279,0.122  
19,73.448,rs8104662,0.141  
19,73.458,rs889135,0.137  
19,73.488,rs11879379,0.127  
19,73.494,rs889133,0.126  
19,73.532,rs3893128,0.117  
19,73.553,rs12460584,0.117  
19,73.569,rs8103945,0.125  
19,73.648,rs919276,0.146  
19,73.684,rs10853822,0.121  
19,73.698,rs8101336,0.095  
19,73.717,rs7248759,0.117  
19,73.749,rs2411335,0.107  
19,73.812,rs2247289,0.098  
19,73.874,rs2163861,0.086  
19,73.892,rs2569729,0.077  
19,73.907,rs266868,0.070  
19,73.918,rs3760722,0.069  
19,73.929,rs1058205,0.067  
19,73.935,rs8112276,0.065  
19,73.943,rs10401509,0.067  
19,73.993,rs1354774,0.078  
19,74.046,rs7248321,0.064  
19,74.053,rs2659079,0.062  
19,74.061,rs17714461,0.061

19,74.098,rs268914,0.053  
19,74.115,rs10409028,0.041  
19,74.135,rs4592765,0.021  
19,74.168,rs16988619,0.022  
19,74.188,rs1654523,0.015  
19,74.195,rs995788,0.009  
19,74.214,rs10451448,0.012  
19,74.220,rs1722560,0.012  
19,74.285,rs1474520,0.018  
19,74.319,rs2691229,0.017  
19,74.327,rs8105944,0.022  
19,74.360,rs1404318,0.010  
19,74.361,rs10426620,0.010  
19,74.373,rs1001538,0.010  
19,74.398,rs9304708,0.012  
19,74.416,rs2091181,0.018  
19,74.429,rs11666870,0.014  
19,74.463,rs9917107,0.009  
19,74.492,rs2075803,0.005  
19,74.517,rs1710378,0.005  
19,74.523,rs12983058,0.004  
19,74.594,rs273658,0.000  
19,74.609,rs7252160,0.000  
19,74.648,rs10421385,0.000  
19,74.756,rs273632,-0.003  
19,74.758,rs10407329,-0.004  
19,74.806,rs12985380,-0.005  
19,74.828,rs2547321,-0.009  
19,74.837,rs3826663,-0.010  
19,74.847,rs2898691,-0.006  
19,74.870,rs9304712,-0.014  
19,74.912,rs11672925,-0.019  
19,74.919,rs2864093,-0.020  
19,74.948,rs3810110,-0.026  
19,74.993,rs4802810,-0.037  
19,75.001,rs10412859,-0.038  
19,75.026,rs7245800,-0.035  
19,75.040,rs7252645,-0.033  
19,75.051,rs10500308,-0.032  
19,75.069,rs11084095,-0.029  
19,75.069,rs4802831,-0.029  
19,75.072,rs17740650,-0.028  
19,75.100,rs12462026,-0.021  
19,75.100,rs7250849,-0.021  
19,75.127,rs2902883,-0.017  
19,75.146,rs2167418,-0.008  
19,75.151,rs10422727,-0.011  
19,75.162,rs4802851,-0.017  
19,75.194,rs4801891,-0.019  
19,75.211,rs12984050,-0.017  
19,75.239,rs4802867,-0.016  
19,75.284,rs8099997,-0.018  
19,75.342,rs1549931,-0.011  
19,75.393,rs1549932,-0.009  
19,75.535,rs7254507,-0.001  
19,75.554,rs3764537,-0.001  
19,75.600,rs8104920,-0.000  
19,75.612,rs11666474,-0.001  
19,75.661,rs10420138,-0.004  
19,75.758,rs9304727,-0.003  
19,75.800,rs10414779,-0.006

19,75.830,rs8112051,-0.006  
19,75.908,rs2560878,-0.004  
19,75.919,rs707312,-0.004  
19,75.954,rs324120,-0.003  
19,75.955,rs11879821,-0.003  
19,75.974,rs2290745,-0.003  
19,76.003,rs9630874,-0.007  
19,76.017,rs2560996,-0.016  
19,76.122,rs324748,-0.045  
19,76.432,rs12971484,-0.049  
19,76.438,rs329973,-0.049  
19,76.469,rs10409120,-0.049  
19,76.480,rs1056185,-0.049  
19,76.640,rs8103317,-0.041  
19,76.915,rs13344253,-0.012  
19,76.929,rs10403312,-0.011  
19,77.008,rs11667063,-0.019  
19,77.084,rs12973596,-0.018  
19,77.360,rs1966574,-0.010  
19,77.524,rs1978616,-0.008  
19,77.561,rs7251313,-0.002  
19,77.603,rs11673295,-0.005  
19,77.706,rs4803025,-0.001  
19,77.750,rs1661957,-0.000  
19,77.811,rs182775,-0.001  
19,78.011,rs12151194,0.001  
19,78.077,rs10405102,-0.000  
19,78.135,rs10419891,-0.002  
19,78.236,rs7251341,-0.007  
19,78.295,rs1661926,-0.010  
19,78.298,rs1661929,-0.010  
19,78.302,rs9967612,-0.011  
19,78.423,rs4801959,-0.007  
19,78.511,rs7247109,-0.005  
19,78.524,rs8103620,-0.005  
19,78.540,rs6509732,-0.005  
19,78.724,rs2965240,-0.011  
19,78.804,rs4263048,-0.014  
19,78.812,rs2914354,-0.015  
19,78.859,rs8109165,-0.025  
19,78.880,rs4801974,-0.027  
19,78.919,rs2052858,-0.033  
19,78.949,rs7256991,-0.031  
19,78.954,rs8104591,-0.033  
19,79.003,rs11672485,-0.040  
19,79.158,rs4801980,-0.061  
19,79.245,rs10418296,-0.062  
19,79.350,rs12979951,-0.063  
19,79.376,rs11666558,-0.057  
19,79.400,rs11668495,-0.054  
19,79.485,rs4599028,-0.043  
19,79.573,rs2708843,-0.038  
19,79.628,rs4801988,-0.037  
19,79.705,rs4994351,-0.027  
19,79.749,rs4803143,-0.028  
19,79.854,rs16985044,-0.015  
19,79.947,rs17207187,-0.003  
19,79.965,rs13344898,-0.003  
19,79.975,rs4803150,-0.004  
19,79.999,rs17305199,-0.005  
19,80.042,rs8111919,-0.009

19,80.052,rs4801994,-0.009  
19,80.091,rs1293703,-0.003  
19,80.205,rs4803160,-0.001  
19,80.213,rs7258128,-0.004  
19,80.252,rs8106416,-0.002  
19,80.320,rs2116849,0.001  
19,80.341,rs4806712,0.003  
19,80.355,rs2619214,0.003  
19,80.377,rs3844453,0.001  
19,80.453,rs307934,0.002  
19,80.517,rs3745405,0.003  
19,80.653,rs7252013,0.001  
19,80.701,rs217541,0.001  
19,80.778,rs12150965,0.004  
19,80.796,rs10420331,0.005  
19,80.915,rs158196,0.003  
19,80.972,rs459247,0.004  
19,81.031,rs628258,0.005  
19,81.101,rs11667088,0.004  
19,81.124,rs612529,0.004  
19,81.156,rs654765,0.006  
19,81.164,rs11669029,0.007  
19,81.201,rs12985735,0.003  
19,81.210,rs10424816,0.003  
19,81.224,rs36643,0.001  
19,81.275,rs10416555,0.003  
19,81.293,rs36631,0.005  
19,81.304,rs28513,0.006  
19,81.313,rs17305311,0.010  
19,81.329,rs13353326,0.012  
19,81.372,rs422948,0.019  
19,81.378,rs2361797,0.020  
19,81.431,rs6509860,0.036  
19,81.442,rs410852,0.038  
19,81.454,rs7252525,0.039  
19,81.456,rs4806741,0.039  
19,81.494,rs1205315,0.002  
19,81.496,rs1205316,0.002  
19,81.503,rs1205322,0.004  
19,81.507,rs17836364,0.006  
19,81.510,rs2241384,0.011  
19,81.521,rs10418607,0.016  
19,81.528,rs2287824,0.018  
19,81.552,rs11084332,0.014  
19,81.608,rs13344319,0.019  
19,81.630,rs7255633,0.020  
19,81.705,rs2008238,0.009  
19,81.711,rs8108901,0.008  
19,81.730,rs8100732,0.008  
19,81.734,rs4806766,0.007  
19,81.757,rs6509882,0.005  
19,81.766,rs7255132,0.006  
19,81.779,rs1000320,0.007  
19,81.790,rs12975662,0.006  
19,81.853,rs272407,0.000  
19,81.868,rs2363863,-0.000  
19,81.884,rs10411879,-0.000  
19,81.904,rs272422,-0.000  
19,81.918,rs8101605,-0.000  
19,81.952,rs4806802,0.001  
19,81.953,rs1654668,0.001

19,81.956,rs731170,0.001  
19,81.958,rs760186,0.000  
19,81.967,rs1654656,-0.001  
19,82.023,rs10423751,-0.001  
19,82.024,rs6509899,-0.001  
19,82.197,rs11672983,-0.005  
19,82.234,rs2278427,-0.004  
19,82.253,rs634742,-0.005  
19,82.272,rs775883,-0.012  
19,82.553,rs12768,-0.010  
19,82.630,rs1654410,-0.011  
19,82.802,rs10418743,-0.005  
19,82.818,rs4806637,-0.005  
19,82.955,rs1654466,-0.002  
19,83.076,rs1054940,-0.002  
19,83.174,rs2532060,-0.003  
19,83.417,rs6509933,-0.027  
19,83.419,rs3786867,-0.028  
19,83.451,rs2288522,-0.019  
19,83.451,rs2288520,-0.019  
19,83.453,rs16986309,-0.019  
19,83.593,rs4806654,-0.018  
19,83.622,rs10403164,-0.019  
19,83.758,rs11878562,-0.028  
19,83.946,rs734517,-0.038  
19,83.980,rs8105530,-0.040  
19,84.123,rs11084396,-0.050  
19,84.149,rs12976922,-0.047  
19,84.296,rs17700376,-0.060  
19,84.377,rs11669732,-0.058  
19,84.669,rs8105272,-0.097  
19,84.707,rs2303088,-0.102  
19,84.734,rs4801655,-0.098  
19,84.782,rs2864436,-0.087  
19,84.993,rs542186,-0.114  
19,85.198,rs2459744,-0.129  
19,85.215,rs7250117,-0.129  
19,85.284,rs6509945,-0.136  
19,86.061,rs8105023,-0.189  
19,86.138,rs10423927,-0.187  
19,86.260,rs6509957,-0.184  
19,86.449,rs4801628,-0.186  
19,86.501,rs7249986,-0.198  
19,86.562,rs299175,-0.212  
19,86.564,rs7245988,-0.212  
19,86.715,rs2616943,-0.212  
19,86.819,rs7258704,-0.241  
19,86.839,rs436488,-0.247  
19,86.861,rs644733,-0.273  
19,86.866,rs16986718,-0.278  
19,86.874,rs9284431,-0.284  
19,86.885,rs4801635,-0.290  
19,86.889,rs12462372,-0.291  
19,86.950,rs302445,-0.304  
19,87.113,rs302837,-0.349  
19,87.149,rs10405239,-0.351  
19,87.308,rs9636113,-0.372  
19,87.311,rs2043599,-0.372  
19,87.445,rs1560693,-0.377  
19,87.486,rs306487,-0.378  
19,87.584,rs306450,-0.378



19,87.685,rs7252935,-0.380  
19,87.791,rs397977,-0.418  
19,87.816,rs388295,-0.477  
19,87.827,rs7247800,-0.503  
19,87.916,rs7256266,-0.497  
19,87.975,rs10409555,-0.550  
19,88.015,rs7250549,-0.499  
19,88.024,rs8104997,-0.488  
19,88.031,rs2087115,-0.486  
19,88.058,rs11665933,-0.494  
19,88.080,rs6509981,-0.496  
19,88.174,rs516022,-0.468  
19,88.323,rs672824,-0.449  
19,88.612,rs8108282,-0.421  
19,88.728,rs10469312,-0.447  
19,88.757,rs12709954,-0.441  
19,88.895,rs10403345,-0.401  
19,88.949,rs1036244,-0.400  
19,89.182,rs1558357,-0.381  
19,89.341,rs11084445,-0.358  
19,89.650,rs2288858,-0.339  
19,89.747,rs8101140,-0.395  
19,89.759,rs9636161,-0.397  
19,90.346,rs4801167,-0.410  
19,90.500,rs3752176,-0.406  
19,90.634,rs12609033,-0.411  
19,90.639,rs1990575,-0.411  
19,90.812,rs9917082,-0.424  
19,90.843,rs2904241,-0.426  
19,90.877,rs11881987,-0.427  
19,90.899,rs10420820,-0.427  
19,90.962,rs8105965,-0.417  
19,90.982,rs714082,-0.409  
19,91.025,rs2072501,-0.395  
19,91.040,rs11878187,-0.413  
19,91.090,rs1548866,-0.439  
19,91.098,rs3795006,-0.415  
19,91.193,rs1558355,-0.470  
19,91.327,rs6510022,-0.472  
19,91.392,rs8100664,-0.485  
19,91.456,rs12974085,-0.464  
19,91.487,rs4801408,-0.489  
19,91.497,rs12971478,-0.492  
19,91.534,rs7259756,-0.483  
19,91.570,rs1433105,-0.483  
19,91.614,rs11668315,-0.463  
19,91.669,rs892168,-0.436  
19,91.723,rs7259337,-0.381  
19,91.734,rs10401795,-0.370  
19,91.742,rs2902943,-0.329  
19,91.917,rs10403926,-0.301  
19,92.077,rs4801433,-0.293  
19,92.373,rs10418480,-0.274  
19,92.471,rs10411733,-0.261  
19,92.766,rs8100796,-0.219  
19,93.021,rs2285611,-0.207  
19,93.203,rs10410631,-0.219  
19,93.460,rs11879465,-0.208  
19,93.835,rs7251603,-0.180  
19,93.934,rs2303817,-0.173  
19,94.844,rs1035522,-0.115

19,95.192,rs4801552,-0.070  
19,96.061,rs7248512,-0.149  
19,96.132,rs260423,-0.147  
19,96.230,rs48524,-0.141  
19,96.518,rs7253055,-0.117  
19,96.608,rs931258,-0.104  
19,96.650,rs3915790,-0.098  
19,96.950,rs3830,-0.113  
19,97.152,rs8100801,-0.104  
19,97.409,rs2278498,-0.092  
19,98.623,rs11666790,-0.084  
20,0.280,rs6139074,0.152  
20,0.429,rs722829,0.154  
20,0.941,rs513522,0.184  
20,1.146,rs6048226,0.178  
20,1.169,rs6082956,0.178  
20,1.297,rs6050276,0.177  
20,1.377,rs6051321,0.177  
20,1.422,rs2092473,0.169  
20,1.510,rs6037430,0.137  
20,1.526,rs6051492,0.131  
20,1.534,rs6084217,0.133  
20,1.566,rs742605,0.142  
20,1.613,rs6139007,0.146  
20,1.671,rs12626158,0.136  
20,1.929,rs2295495,0.132  
20,2.016,rs6052047,0.130  
20,2.020,rs6037660,0.130  
20,2.240,rs459012,0.118  
20,2.569,rs6107514,0.103  
20,2.665,rs204694,0.090  
20,2.738,rs2316866,0.093  
20,2.786,rs6139653,0.104  
20,2.823,rs6116745,0.093  
20,2.836,rs282162,0.088  
20,2.855,rs3761308,0.099  
20,2.898,rs6139752,0.099  
20,2.950,rs911448,0.096  
20,3.047,rs6053635,0.074  
20,3.085,rs6107696,0.063  
20,3.157,rs6053783,0.049  
20,3.171,rs6107716,0.049  
20,3.418,rs6085469,0.047  
20,3.461,rs6139971,0.050  
20,3.487,rs873544,0.044  
20,3.509,rs1114734,0.041  
20,3.536,rs6117279,0.069  
20,3.560,rs6085580,0.085  
20,3.674,rs1884639,0.079  
20,3.788,rs16992822,0.071  
20,3.837,rs3746804,0.067  
20,3.854,rs2024896,0.066  
20,3.892,rs4815961,0.064  
20,3.899,rs668988,0.063  
20,3.909,rs13045384,0.062  
20,4.084,rs592954,0.048  
20,4.099,rs6077185,0.047  
20,4.361,rs552367,0.027  
20,4.434,rs12625746,0.023  
20,4.560,rs1888087,0.015  
20,4.673,rs6086361,0.010

20,4.695,rs4816051,0.010  
20,4.787,rs742922,0.005  
20,4.830,rs6055803,0.007  
20,4.834,rs910389,0.004  
20,4.835,rs524765,0.003  
20,4.838,rs1014897,0.004  
20,4.842,rs478451,0.006  
20,4.900,rs1997924,0.005  
20,5.051,rs533747,0.014  
20,5.085,rs480789,0.005  
20,5.098,rs6056182,0.004  
20,5.220,rs2317321,0.007  
20,5.436,rs6056558,0.023  
20,5.530,rs6140951,0.028  
20,5.611,rs11696364,0.046  
20,5.732,rs6118727,0.023  
20,5.792,rs761857,0.020  
20,5.810,rs6057063,0.020  
20,5.824,rs6042507,0.008  
20,5.860,rs715217,0.007  
20,5.923,rs976192,0.008  
20,6.034,rs2250091,0.006  
20,6.315,rs6110838,0.005  
20,6.414,rs6111045,0.004  
20,6.471,rs202516,0.004  
20,6.585,rs202490,0.002  
20,6.637,rs200885,0.000  
20,6.700,rs200891,0.000  
20,6.790,rs156330,-0.001  
20,6.818,rs7361808,-0.000  
20,6.892,rs6045210,0.000  
20,6.924,rs1884565,0.000  
20,6.969,rs6075340,0.000  
20,7.019,rs6105944,0.002  
20,7.029,rs3790341,0.003  
20,7.029,rs3828016,0.003  
20,7.030,rs2235745,0.003  
20,7.395,rs2206699,-0.000  
20,7.486,rs16980553,-0.000  
20,7.514,rs6046274,-0.003  
20,7.563,rs6046419,-0.004  
20,7.889,rs6035745,-0.008  
20,7.976,rs6075784,-0.016  
20,7.993,rs6035842,-0.016  
20,8.036,rs6082420,-0.016  
20,8.122,rs6082497,-0.019  
20,8.201,rs6047800,-0.018  
20,8.227,rs8116927,-0.017  
20,8.337,rs214814,-0.032  
20,8.368,rs6036147,-0.036  
20,8.372,rs6113720,-0.036  
20,8.383,rs2076408,-0.033  
20,8.403,rs214828,-0.015  
20,8.457,rs2422707,-0.012  
20,8.492,rs2179463,-0.010  
20,8.560,rs6048587,-0.012  
20,8.677,rs2076650,-0.012  
20,8.868,rs4815270,-0.003  
20,8.889,rs6114605,-0.002  
20,8.912,rs6083505,-0.003  
20,8.951,rs6083536,-0.006

20,9.157,rs6115073,-0.006  
20,9.189,rs6037081,-0.006  
20,9.300,rs6083911,-0.007  
20,9.338,rs2422821,-0.006  
20,9.406,rs6051098,-0.005  
20,9.435,rs6037336,-0.005  
20,9.589,rs16990611,-0.001  
20,9.664,rs215519,-0.000  
20,9.719,rs215543,-0.001  
20,10.239,rs3746692,-0.003  
20,10.297,rs615568,-0.003  
20,10.374,rs8184236,-0.010  
20,10.403,rs3761248,-0.014  
20,10.416,rs4813627,-0.015  
20,10.480,rs857242,-0.022  
20,10.489,rs11087565,-0.021  
20,10.498,rs864140,-0.020  
20,10.506,rs12480378,-0.021  
20,10.515,rs6115792,-0.021  
20,10.580,rs6084276,-0.021  
20,10.865,rs979332,-0.033  
20,10.910,rs6076524,-0.034  
20,11.233,rs235517,-0.039  
20,11.246,rs170974,-0.039  
20,11.284,rs6051989,-0.042  
20,11.338,rs2670314,-0.045  
20,11.405,rs656635,-0.039  
20,11.421,rs3746638,-0.030  
20,11.435,rs6139180,-0.025  
20,11.462,rs735710,-0.026  
20,11.505,rs580502,-0.032  
20,11.560,rs2295343,-0.039  
20,11.593,rs683808,-0.028  
20,11.673,rs2295348,-0.026  
20,11.680,rs4813643,-0.026  
20,11.776,rs6116065,-0.024  
20,12.087,rs998132,-0.040  
20,12.155,rs2143234,-0.045  
20,12.210,rs6052257,-0.048  
20,12.258,rs6139278,-0.051  
20,12.296,rs945763,-0.047  
20,12.326,rs2027236,-0.044  
20,12.406,rs1741295,-0.051  
20,12.413,rs6052378,-0.040  
20,12.428,rs1741283,-0.033  
20,12.434,rs1741285,-0.030  
20,12.463,rs945772,-0.033  
20,12.561,rs6084657,-0.045  
20,12.574,rs2027237,-0.046  
20,12.589,rs1217369,-0.046  
20,12.606,rs6116265,-0.049  
20,12.745,rs6107436,-0.072  
20,12.874,rs4110508,-0.083  
20,12.913,rs513783,-0.092  
20,12.943,rs3912089,-0.105  
20,13.037,rs3904864,-0.086  
20,13.070,rs46593,-0.084  
20,13.100,rs10485512,-0.082  
20,13.161,rs297672,-0.084  
20,13.203,rs6116375,-0.088  
20,13.210,rs6133125,-0.089

20,13.477,rs911165,-0.090  
20,13.617,rs6052674,-0.098  
20,13.650,rs6139494,-0.068  
20,13.664,rs961197,-0.069  
20,13.745,rs6037908,-0.071  
20,13.817,rs6116466,-0.072  
20,13.890,rs6052761,-0.072  
20,13.921,rs2756271,-0.079  
20,14.033,rs6052787,-0.119  
20,14.070,rs2245220,-0.131  
20,14.078,rs11087655,-0.130  
20,14.216,rs2422951,-0.120  
20,14.267,rs1535380,-0.119  
20,14.280,rs2422975,-0.120  
20,14.286,rs3746674,-0.121  
20,14.319,rs1998292,-0.128  
20,14.338,rs2281639,-0.129  
20,14.373,rs6084900,-0.131  
20,14.389,rs2423032,-0.134  
20,14.401,rs1885306,-0.133  
20,14.412,rs13039769,-0.131  
20,14.483,rs2423067,-0.143  
20,14.514,rs6084910,-0.172  
20,14.543,rs1131382,-0.184  
20,14.565,rs6107541,-0.180  
20,14.618,rs1110277,-0.161  
20,14.780,rs1715364,-0.115  
20,14.807,rs1776972,-0.115  
20,14.883,rs1776947,-0.114  
20,14.962,rs2748901,-0.107  
20,15.082,rs13042903,-0.109  
20,15.149,rs8126456,-0.110  
20,15.242,rs404678,-0.100  
20,15.330,rs4815763,-0.094  
20,15.361,rs6038058,-0.093  
20,15.609,rs6107581,-0.080  
20,15.614,rs2423089,-0.080  
20,15.757,rs6107589,-0.078  
20,15.796,rs10485483,-0.072  
20,15.821,rs6053181,-0.068  
20,16.096,rs6076792,-0.034  
20,16.323,rs910970,-0.027  
20,16.578,rs6085118,-0.025  
20,16.788,rs11697998,-0.029  
20,16.862,rs6053374,-0.029  
20,17.037,rs574755,-0.027  
20,17.148,rs6053422,-0.030  
20,17.265,rs6116807,-0.054  
20,17.280,rs2423094,-0.056  
20,17.283,rs6053445,-0.070  
20,17.288,rs6139748,-0.070  
20,17.455,rs6053465,-0.056  
20,17.819,rs16991130,-0.057  
20,17.985,rs6038219,-0.063  
20,18.272,rs805751,-0.102  
20,18.441,rs805770,-0.128  
20,18.599,rs805745,-0.125  
20,18.640,rs805743,-0.131  
20,18.683,rs6085252,-0.155  
20,18.742,rs1546478,-0.183  
20,18.868,rs6053640,-0.225

20,18.876,rs2003017,-0.226  
20,19.022,rs6107683,-0.238  
20,19.080,rs4815851,-0.268  
20,19.487,rs1555141,-0.226  
20,19.498,rs6053718,-0.225  
20,19.534,rs4815864,-0.218  
20,19.535,rs966534,-0.218  
20,19.730,rs6133268,-0.212  
20,19.902,rs6139850,-0.194  
20,19.903,rs237084,-0.194  
20,19.945,rs6076879,-0.119  
20,19.952,rs1699233,-0.109  
20,19.955,rs1699230,-0.106  
20,19.987,rs6038317,-0.127  
20,20.014,rs988036,-0.151  
20,20.066,rs381571,-0.153  
20,20.100,rs236114,-0.154  
20,20.195,rs6133280,-0.156  
20,20.230,rs6117041,-0.153  
20,20.305,rs6053889,-0.149  
20,20.315,rs749922,-0.148  
20,20.392,rs6053925,-0.143  
20,20.505,rs6053961,-0.132  
20,20.618,rs6038400,-0.134  
20,20.624,rs7354540,-0.133  
20,20.792,rs6076985,-0.126  
20,20.840,rs2148815,-0.129  
20,20.934,rs953420,-0.130  
20,20.961,rs6054264,-0.130  
20,21.331,rs984677,-0.202  
20,21.378,rs2143712,-0.219  
20,21.386,rs2206920,-0.220  
20,21.402,rs2206922,-0.221  
20,21.431,rs6085661,-0.222  
20,21.445,rs235710,-0.209  
20,21.479,rs1980499,-0.206  
20,21.604,rs235753,-0.189  
20,21.614,rs6054517,-0.189  
20,21.727,rs235725,-0.183  
20,21.762,rs6054529,-0.184  
20,21.891,rs6038617,-0.197  
20,21.957,rs6038621,-0.206  
20,22.014,rs1392625,-0.213  
20,22.101,rs1028394,-0.195  
20,22.346,rs6085732,-0.208  
20,22.481,rs7263691,-0.207  
20,23.084,rs2225265,-0.219  
20,23.253,rs1005351,-0.209  
20,24.010,rs4813818,-0.277  
20,24.204,rs6054856,-0.394  
20,24.273,rs10485715,-0.403  
20,24.399,rs971226,-0.417  
20,24.439,rs6054963,-0.414  
20,24.557,rs7263704,-0.395  
20,24.557,rs6055075,-0.395  
20,24.602,rs4816009,-0.376  
20,24.825,rs6077242,-0.353  
20,24.951,rs2294551,-0.342  
20,25.602,rs2423334,-0.241  
20,25.772,rs6038995,-0.221  
20,25.778,rs1058029,-0.221

20,25.919,rs6039004,-0.208  
20,26.176,rs6118062,-0.184  
20,26.239,rs6039040,-0.174  
20,26.267,rs4142365,-0.165  
20,26.356,rs978266,-0.128  
20,26.468,rs2423354,-0.107  
20,26.605,rs2179138,-0.101  
20,26.700,rs6133564,-0.112  
20,26.774,rs2745755,-0.122  
20,26.804,rs6140595,-0.127  
20,27.031,rs708925,-0.148  
20,27.322,rs4471960,-0.133  
20,27.366,rs2327070,-0.129  
20,27.442,rs6140629,-0.136  
20,27.514,rs2143205,-0.122  
20,27.538,rs1040496,-0.093  
20,27.568,rs926505,-0.100  
20,27.593,rs6056198,-0.097  
20,27.667,rs4295085,-0.106  
20,27.696,rs6133641,-0.109  
20,27.733,rs226191,-0.113  
20,27.789,rs6140833,-0.144  
20,27.812,rs6108249,-0.158  
20,27.901,rs6118505,-0.152  
20,27.949,rs6086799,-0.148  
20,28.084,rs5011374,-0.141  
20,28.209,rs6140909,-0.149  
20,28.294,rs6077510,-0.151  
20,28.482,rs16995800,-0.149  
20,28.676,rs4369940,-0.147  
20,28.819,rs6086904,-0.137  
20,28.909,rs8117167,-0.156  
20,28.914,rs926475,-0.146  
20,29.113,rs6140971,-0.202  
20,29.177,rs928366,-0.217  
20,29.202,rs219861,-0.222  
20,29.235,rs6039529,-0.226  
20,29.343,rs2423395,-0.238  
20,29.517,rs2423438,-0.279  
20,29.605,rs2423462,-0.328  
20,29.637,rs4566434,-0.319  
20,29.696,rs6056871,-0.289  
20,29.712,rs6056875,-0.279  
20,29.802,rs6118746,-0.254  
20,29.905,rs221007,-0.240  
20,30.029,rs6087052,-0.245  
20,30.068,rs6057009,-0.244  
20,30.195,rs4813906,-0.237  
20,30.246,rs6057057,-0.213  
20,30.314,rs2064658,-0.264  
20,30.343,rs4816196,-0.240  
20,30.347,rs6118852,-0.241  
20,30.512,rs674630,-0.235  
20,30.568,rs551927,-0.240  
20,30.604,rs6133794,-0.286  
20,30.649,rs6077654,-0.304  
20,30.709,rs13044468,-0.330  
20,30.716,rs594240,-0.338  
20,30.755,rs2210585,-0.387  
20,30.779,rs4813918,-0.502  
20,30.826,rs6077681,-0.477

20,30.909,rs6039763,-0.418  
20,30.967,rs6032826,-0.395  
20,31.077,rs6074113,-0.366  
20,31.132,rs6077718,-0.337  
20,31.148,rs2284300,-0.340  
20,31.230,rs6077729,-0.355  
20,31.273,rs362614,-0.352  
20,31.301,rs6133869,-0.357  
20,31.379,rs2327290,-0.381  
20,31.537,rs16991555,-0.382  
20,31.559,rs6108571,-0.380  
20,31.888,rs12106093,-0.370  
20,32.156,rs8708,-0.355  
20,32.218,rs6040061,-0.352  
20,32.222,rs3748478,-0.351  
20,32.247,rs910118,-0.347  
20,32.288,rs6077892,-0.340  
20,32.290,rs2423516,-0.308  
20,32.293,rs6040109,-0.305  
20,32.302,rs6040118,-0.297  
20,32.310,rs1022790,-0.304  
20,32.321,rs6108695,-0.297  
20,32.346,rs6104663,-0.325  
20,32.367,rs2423523,-0.352  
20,32.412,rs1884136,-0.387  
20,32.424,rs6040218,-0.392  
20,32.443,rs4813040,-0.409  
20,32.453,rs1232587,-0.414  
20,32.480,rs6077977,-0.429  
20,32.501,rs4813949,-0.441  
20,32.510,rs1887320,-0.442  
20,32.787,rs1028846,-0.467  
20,32.793,rs11905962,-0.468  
20,32.815,rs6033014,-0.476  
20,33.039,rs761569,-0.502  
20,33.249,rs2423539,-0.535  
20,33.455,rs11698505,-0.580  
20,33.663,rs12624835,-0.608  
20,34.001,rs6108837,-0.709  
20,34.171,rs1028479,-0.634  
20,34.208,rs2327340,-0.662  
20,34.457,rs2143861,-0.662  
20,34.580,rs6040442,-0.622  
20,34.623,rs2224184,-0.630  
20,34.635,rs4814019,-0.621  
20,34.705,rs6104773,-0.569  
20,34.713,rs6131239,-0.562  
20,34.748,rs2175785,-0.531  
20,34.891,rs982920,-0.561  
20,35.010,rs6074345,-0.558  
20,35.220,rs3177118,-0.547  
20,35.269,rs6040997,-0.526  
20,35.308,rs10485751,-0.507  
20,35.312,rs6109223,-0.505  
20,35.323,rs6131295,-0.508  
20,35.334,rs6041037,-0.510  
20,35.336,rs2206801,-0.505  
20,35.336,rs2327592,-0.505  
20,35.347,rs1997810,-0.471  
20,35.359,rs6033284,-0.470  
20,35.385,rs6514240,-0.468



20,35.463,rs735349,-0.462  
20,35.531,rs6078495,-0.471  
20,35.539,rs4496385,-0.474  
20,35.556,rs4813081,-0.476  
20,35.596,rs6041271,-0.437  
20,35.633,rs2208981,-0.401  
20,35.657,rs6041318,-0.410  
20,35.675,rs6074422,-0.414  
20,35.722,rs6041385,-0.413  
20,35.870,rs6109480,-0.371  
20,35.990,rs7274881,-0.390  
20,36.107,rs6134608,-0.371  
20,36.120,rs6104941,-0.372  
20,36.145,rs6109515,-0.335  
20,36.168,rs10485760,-0.365  
20,36.172,rs1452321,-0.371  
20,36.215,rs6134632,-0.354  
20,36.315,rs1333400,-0.293  
20,36.381,rs6033504,-0.312  
20,36.449,rs6104966,-0.306  
20,36.509,rs11087039,-0.291  
20,36.568,rs845575,-0.279  
20,36.639,rs1099620,-0.297  
20,36.716,rs845611,-0.315  
20,36.752,rs6033531,-0.323  
20,36.800,rs2423712,-0.338  
20,36.841,rs3898706,-0.331  
20,36.847,rs13045508,-0.332  
20,36.904,rs6041737,-0.332  
20,36.908,rs433279,-0.332  
20,36.995,rs6041768,-0.329  
20,37.072,rs243881,-0.328  
20,37.149,rs6074558,-0.287  
20,37.159,rs6105042,-0.286  
20,37.178,rs6041890,-0.315  
20,37.252,rs4642012,-0.338  
20,37.378,rs6134838,-0.417  
20,37.386,rs6033654,-0.421  
20,37.390,rs11907045,-0.416  
20,37.393,rs6041977,-0.412  
20,37.402,rs6041981,-0.406  
20,37.413,rs17191004,-0.398  
20,37.419,rs6109797,-0.395  
20,37.423,rs6078976,-0.403  
20,37.451,rs653215,-0.434  
20,37.452,rs17263187,-0.436  
20,37.507,rs6042033,-0.553  
20,37.650,rs6042171,-0.569  
20,37.682,rs2057258,-0.564  
20,37.725,rs6042307,-0.639  
20,37.726,rs6079136,-0.640  
20,37.730,rs6131512,-0.650  
20,37.771,rs2064644,-0.672  
20,37.777,rs2423757,-0.672  
20,37.809,rs7274524,-0.678  
20,37.842,rs6074674,-0.682  
20,37.891,rs7273854,-0.688  
20,37.914,rs7265754,-0.691  
20,37.971,rs6079395,-0.715  
20,37.983,rs6033955,-0.652  
20,37.997,rs6079423,-0.633

20,38.027,rs2327854,-0.646  
20,38.027,rs6135159,-0.646  
20,38.044,rs1015581,-0.698  
20,38.044,rs1475348,-0.699  
20,38.046,rs2423812,-0.699  
20,38.114,rs6079540,-0.729  
20,38.188,rs2423846,-0.741  
20,38.199,rs353147,-0.743  
20,38.438,rs6110510,-0.767  
20,38.468,rs435532,-0.745  
20,38.627,rs6074843,-0.866  
20,38.751,rs432033,-0.896  
20,39.076,rs175259,-0.807  
20,39.210,rs458032,-0.813  
20,39.371,rs2423922,-0.817  
20,39.455,rs6135395,-0.779  
20,39.496,rs6079790,-0.761  
20,39.502,rs1013916,-0.759  
20,39.539,rs433059,-0.730  
20,39.542,rs399698,-0.772  
20,39.559,rs6074887,-0.735  
20,39.625,rs6043261,-0.746  
20,39.631,rs971731,-0.744  
20,39.684,rs379166,-0.713  
20,39.714,rs4814371,-0.714  
20,39.868,rs2423963,-0.682  
20,39.896,rs6135414,-0.687  
20,40.153,rs6135425,-0.770  
20,40.205,rs6074909,-0.762  
20,40.429,rs1035177,-0.674  
20,40.514,rs2876410,-0.717  
20,40.547,rs6079890,-0.736  
20,40.552,rs409303,-0.704  
20,40.554,rs6079891,-0.691  
20,40.557,rs367114,-0.683  
20,40.572,rs6079894,-0.701  
20,40.633,rs7265729,-0.751  
20,41.170,rs459928,-0.873  
20,41.198,rs2021915,-0.868  
20,41.364,rs6079926,-0.860  
20,41.558,rs6043448,-1.039  
20,41.599,rs6079936,-1.088  
20,41.608,rs12624386,-1.096  
20,41.609,rs4813189,-1.097  
20,41.738,rs6135558,-1.211  
20,41.781,rs17634776,-1.220  
20,41.789,rs6074958,-1.226  
20,41.842,rs6135591,-1.348  
20,41.951,rs8124934,-1.398  
20,41.957,rs6043648,-1.401  
20,41.967,rs6043659,-1.402  
20,41.985,rs6043663,-1.403  
20,41.998,rs775112,-1.434  
20,42.038,rs6135650,-1.462  
20,42.044,rs6034358,-1.458  
20,42.051,rs6080106,-1.526  
20,42.077,rs16997071,-1.425  
20,42.085,rs775146,-1.401  
20,42.117,rs6105524,-1.352  
20,42.227,rs1329820,-1.294  
20,42.240,rs6080167,-1.272

20,42.274,rs6043813,-1.229  
20,42.277,rs4814456,-1.225  
20,42.313,rs1541065,-1.171  
20,42.439,rs6111060,-1.178  
20,42.563,rs761901,-1.203  
20,42.605,rs4814499,-1.202  
20,42.658,rs8123698,-1.187  
20,42.668,rs2295115,-1.184  
20,42.805,rs2277777,-1.087  
20,43.062,rs12329492,-1.037  
20,43.471,rs6080335,-1.005  
20,43.572,rs1885578,-0.998  
20,43.608,rs6044228,-1.022  
20,43.685,rs2206654,-0.936  
20,43.702,rs11907513,-0.943  
20,43.750,rs3171297,-0.961  
20,43.754,rs4813245,-0.965  
20,43.767,rs6075101,-1.007  
20,43.790,rs6080397,-1.014  
20,43.801,rs10084490,-0.984  
20,43.808,rs6044299,-0.984  
20,43.960,rs6044410,-0.976  
20,44.033,rs6044461,-0.960  
20,44.067,rs997424,-0.899  
20,44.184,rs991747,-0.931  
20,44.335,rs4814579,-1.055  
20,44.412,rs8116679,-1.118  
20,44.415,rs6044739,-1.120  
20,44.502,rs16999097,-1.171  
20,44.525,rs6075207,-1.185  
20,44.535,rs8115774,-1.197  
20,44.615,rs6044850,-1.283  
20,44.626,rs2023509,-1.279  
20,44.626,rs6034837,-1.278  
20,44.632,rs6080726,-1.280  
20,44.669,rs201933,-1.292  
20,44.715,rs6044891,-1.356  
20,44.782,rs3790325,-1.347  
20,44.795,rs6044930,-1.359  
20,44.930,rs2296903,-1.304  
20,44.931,rs4814640,-1.304  
20,44.968,rs2077520,-1.306  
20,45.163,rs2143543,-1.331  
20,45.187,rs6045032,-1.306  
20,45.254,rs2328223,-1.293  
20,45.264,rs6136213,-1.294  
20,45.284,rs6111714,-1.282  
20,45.311,rs6105830,-1.253  
20,45.338,rs2618647,-1.223  
20,45.339,rs2618648,-1.222  
20,45.409,rs6045109,-1.066  
20,45.414,rs11697158,-1.066  
20,45.624,rs6080941,-1.032  
20,45.719,rs6045177,-1.074  
20,45.781,rs1124933,-1.081  
20,45.965,rs1884104,-1.136  
20,46.031,rs2424126,-1.155  
20,46.193,rs6045357,-1.205  
20,46.367,rs2424205,-1.237  
20,46.842,rs13037428,-1.324  
20,46.940,rs6081382,-1.336

20,46.949,rs6105966,-1.335  
20,46.966,rs8120864,-1.334  
20,47.092,rs2876503,-1.310  
20,47.103,rs6045689,-1.308  
20,47.200,rs7262069,-1.347  
20,47.218,rs6045728,-1.353  
20,47.248,rs6132146,-1.289  
20,47.370,rs6136614,-1.226  
20,47.409,rs13043431,-1.177  
20,47.430,rs6132158,-1.158  
20,47.456,rs6075475,-1.095  
20,47.495,rs1885623,-1.108  
20,47.794,rs8114946,-1.206  
20,47.813,rs6046009,-1.212  
20,47.952,rs6081598,-1.135  
20,48.013,rs3790221,-1.170  
20,48.059,rs6112418,-1.180  
20,48.076,rs6081622,-1.182  
20,48.163,rs2328412,-1.197  
20,48.193,rs3790267,-1.222  
20,48.239,rs4589832,-1.260  
20,48.273,rs6046215,-1.287  
20,48.298,rs1406968,-1.305  
20,48.324,rs11087290,-1.331  
20,48.340,rs3790286,-1.350  
20,48.473,rs808716,-1.291  
20,48.673,rs6035459,-1.258  
20,48.710,rs6046391,-1.211  
20,48.744,rs6136870,-1.166  
20,48.785,rs6106154,-1.096  
20,48.839,rs1040577,-0.965  
20,48.840,rs16981318,-0.964  
20,48.858,rs16981330,-0.940  
20,48.864,rs199541,-0.934  
20,48.889,rs13039938,-0.914  
20,48.900,rs1876813,-0.906  
20,48.916,rs6112690,-0.892  
20,48.930,rs2328472,-0.904  
20,48.961,rs199579,-0.935  
20,49.134,rs2255255,-0.993  
20,49.175,rs6136936,-1.024  
20,49.215,rs926644,-1.050  
20,49.258,rs6081877,-1.063  
20,49.395,rs6081901,-1.076  
20,49.604,rs6046759,-1.014  
20,49.633,rs2424303,-1.028  
20,49.666,rs6075637,-1.007  
20,49.688,rs6035596,-1.011  
20,49.723,rs2424339,-1.023  
20,49.816,rs6046805,-1.108  
20,49.867,rs6046818,-1.083  
20,49.922,rs6137015,-1.058  
20,49.953,rs6106244,-1.054  
20,50.352,rs1210347,-1.009  
20,50.942,rs17718943,-1.019  
20,50.942,rs6035704,-1.019  
20,51.016,rs963487,-1.055  
20,51.380,rs4815007,-1.001  
20,51.467,rs804531,-0.966  
20,51.902,rs172038,-0.892  
20,51.949,rs2757072,-0.884

20,52.063,rs17753678,-0.859  
20,52.084,rs1415816,-0.854  
20,52.101,rs6082726,-0.795  
20,52.291,rs11907070,-0.765  
20,52.553,rs6082843,-0.719  
20,52.554,rs11907005,-0.738  
20,52.555,rs6048352,-0.762  
20,52.556,rs6082845,-0.761  
20,52.596,rs6048374,-0.726  
20,52.624,rs6137770,-0.696  
20,52.706,rs6048420,-0.826  
20,52.870,rs11696756,-0.863  
20,52.889,rs2424502,-0.868  
20,52.924,rs2567609,-0.861  
20,53.069,rs6113954,-0.778  
20,53.298,rs11697315,-0.743  
20,53.314,rs6137886,-0.744  
20,53.346,rs6048703,-0.743  
20,53.443,rs2253834,-0.717  
20,53.511,rs1028523,-0.695  
20,53.639,rs2983640,-0.633  
20,53.674,rs13040731,-0.625  
20,53.696,rs6049003,-0.620  
20,53.699,rs8123755,-0.617  
20,53.729,rs2070856,-0.570  
20,53.786,rs6083297,-0.443  
20,53.809,rs1799841,-0.425  
20,53.839,rs2260409,-0.415  
20,53.868,rs755032,-0.416  
20,53.910,rs6114429,-0.454  
20,53.913,rs3905230,-0.454  
20,53.944,rs6049391,-0.483  
20,53.972,rs6049428,-0.472  
20,54.088,rs6049586,-0.450  
20,54.089,rs6076221,-0.450  
20,54.142,rs6076225,-0.480  
20,54.185,rs6114708,-0.489  
20,54.226,rs6114735,-0.481  
20,54.233,rs6049713,-0.478  
20,54.252,rs6049735,-0.473  
20,54.255,rs16986675,-0.473  
20,54.301,rs6138318,-0.465  
20,54.306,rs6036836,-0.473  
20,54.323,rs1409371,-0.494  
20,54.376,rs6106915,-0.474  
20,54.397,rs6114812,-0.467  
20,54.413,rs6076248,-0.465  
20,54.438,rs4815299,-0.461  
20,54.531,rs226664,-0.489  
20,54.579,rs8119131,-0.483  
20,54.764,rs6050255,-0.446  
20,54.776,rs2144371,-0.436  
20,54.800,rs4813547,-0.423  
20,54.804,rs6083776,-0.420  
20,54.806,rs13038092,-0.420  
20,54.810,rs6115178,-0.420  
20,54.815,rs6132850,-0.420  
20,55.298,rs6088901,-0.480  
20,55.315,rs12479885,-0.481  
20,55.373,rs2233832,-0.484  
20,55.413,rs6058012,-0.478

20,55.561,rs6121302,-0.420  
20,55.590,rs6061085,-0.408  
20,56.257,rs6087948,-0.463  
20,56.268,rs456798,-0.464  
20,56.470,rs6058894,-0.476  
20,56.651,rs17123911,-0.473  
20,56.664,rs6088055,-0.478  
20,56.705,rs6119316,-0.495  
20,56.759,rs378098,-0.542  
20,56.789,rs11696307,-0.572  
20,56.818,rs6088116,-0.505  
20,56.924,rs3818222,-0.518  
20,57.024,rs6088177,-0.536  
20,57.074,rs910397,-0.499  
20,57.079,rs2747565,-0.487  
20,57.082,rs17405840,-0.486  
20,57.084,rs4911134,-0.480  
20,57.086,rs6057924,-0.478  
20,57.115,rs1205340,-0.419  
20,57.167,rs6088727,-0.316  
20,57.180,rs4911494,-0.312  
20,57.427,rs6060612,-0.386  
20,57.676,rs6141600,-0.364  
20,57.782,rs2425193,-0.366  
20,57.861,rs4239689,-0.365  
20,57.909,rs6103072,-0.366  
20,57.937,rs906466,-0.365  
20,57.943,rs2425256,-0.363  
20,58.143,rs6129459,-0.392  
20,58.342,rs1146261,-0.326  
20,58.440,rs6029941,-0.306  
20,59.282,rs11700106,-0.300  
20,59.371,rs1073768,-0.302  
20,59.483,rs6104528,-0.298  
20,59.565,rs6018027,-0.282  
20,59.570,rs6063022,-0.281  
20,59.593,rs12329503,-0.281  
20,59.690,rs11086214,-0.300  
20,59.711,rs4809641,-0.301  
20,59.712,rs8114302,-0.301  
20,59.740,rs6125111,-0.305  
20,59.856,rs6019196,-0.304  
20,59.980,rs6063367,-0.303  
20,60.036,rs198498,-0.298  
20,60.050,rs198490,-0.297  
20,60.222,rs6067491,-0.292  
20,60.243,rs6020712,-0.291  
20,60.316,rs1076664,-0.290  
20,60.501,rs6096822,-0.290  
20,60.551,rs6021960,-0.290  
20,60.587,rs16987050,-0.299  
20,60.602,rs8115683,-0.303  
20,60.632,rs6013590,-0.310  
20,60.694,rs6022419,-0.329  
20,60.745,rs6091845,-0.304  
20,60.774,rs6023939,-0.292  
20,60.801,rs6064324,-0.278  
20,60.803,rs6014601,-0.280  
20,60.808,rs1341021,-0.285  
20,60.818,rs2022499,-0.290  
20,60.885,rs13043114,-0.313

20,60.907,rs1005611,-0.324  
20,60.914,rs8123363,-0.329  
20,60.925,rs6070933,-0.338  
20,60.943,rs6015693,-0.362  
20,60.948,rs911719,-0.369  
20,60.989,rs1006945,-0.450  
20,61.010,rs731671,-0.492  
20,61.082,rs6016010,-0.498  
20,61.091,rs17764371,-0.498  
20,61.103,rs2868504,-0.496  
20,61.215,rs13036738,-0.512  
20,61.247,rs4812398,-0.508  
20,61.816,rs292858,-0.603  
20,62.020,rs6071808,-0.630  
20,62.277,rs2145943,-0.688  
20,62.331,rs6129451,-0.704  
20,62.364,rs12479923,-0.725  
20,62.385,rs6124202,-0.739  
20,62.466,rs6071905,-0.778  
20,62.478,rs6028809,-0.779  
20,62.610,rs6101843,-0.748  
20,62.825,rs1406967,-0.699  
20,62.891,rs6071980,-0.657  
20,62.900,rs6101922,-0.635  
20,62.962,rs6029006,-0.631  
20,62.966,rs6101934,-0.631  
20,63.240,rs3092155,-0.526  
20,63.253,rs6016361,-0.526  
20,63.256,rs6016373,-0.477  
20,63.262,rs17820943,-0.419  
20,63.263,rs6072090,-0.410  
20,63.264,rs6016412,-0.404  
20,63.269,rs10485676,-0.367  
20,63.270,rs6029326,-0.357  
20,63.272,rs1883700,-0.352  
20,63.272,rs6029356,-0.390  
20,63.276,rs4142346,-0.455  
20,63.276,rs6029424,-0.466  
20,63.278,rs6093408,-0.447  
20,63.279,rs3092685,-0.429  
20,63.280,rs2425460,-0.429  
20,63.921,rs2143229,-0.365  
20,64.004,rs6102453,-0.353  
20,64.630,rs4810337,-0.240  
20,64.965,rs6029852,-0.200  
20,65.122,rs2425464,-0.208  
20,65.129,rs2050083,-0.207  
20,65.135,rs3092525,-0.206  
20,65.139,rs926478,-0.207  
20,65.156,rs4812562,-0.211  
20,65.166,rs6016647,-0.214  
20,65.170,rs6029893,-0.215  
20,65.227,rs6029911,-0.221  
20,65.369,rs6130019,-0.239  
20,65.408,rs2144009,-0.231  
20,65.445,rs746413,-0.230  
20,65.870,rs6016732,-0.188  
20,65.894,rs6030107,-0.188  
20,65.935,rs1016071,-0.186  
20,65.955,rs6072680,-0.188  
20,65.993,rs6030140,-0.192

20,65.999,rs2227158,-0.193  
20,66.018,rs6016752,-0.196  
20,66.021,rs6072689,-0.196  
20,66.050,rs6016759,-0.197  
20,66.064,rs6102805,-0.178  
20,66.096,rs1003576,-0.208  
20,66.115,rs7262535,-0.204  
20,66.144,rs6016775,-0.197  
20,66.237,rs6130130,-0.190  
20,66.398,rs6030295,-0.191  
20,66.433,rs6030328,-0.195  
20,66.441,rs764444,-0.208  
20,66.442,rs6065517,-0.205  
20,66.450,rs4611702,-0.178  
20,66.468,rs6016864,-0.149  
20,66.493,rs17811221,-0.146  
20,66.496,rs733977,-0.149  
20,66.498,rs2038668,-0.152  
20,66.515,rs176380,-0.170  
20,66.528,rs176379,-0.179  
20,66.532,rs6065547,-0.183  
20,66.533,rs208262,-0.184  
20,66.537,rs208270,-0.237  
20,66.550,rs535000,-0.237  
20,67.043,rs16987990,-0.251  
20,67.250,rs4239695,-0.258  
20,67.732,rs4142387,-0.289  
20,68.130,rs4812713,-0.276  
20,68.169,rs4812716,-0.276  
20,68.236,rs743998,-0.296  
20,68.245,rs3135415,-0.332  
20,68.384,rs619289,-0.314  
20,68.467,rs3091249,-0.297  
20,68.471,rs13038394,-0.296  
20,68.475,rs826959,-0.296  
20,68.477,rs3117532,-0.282  
20,68.479,rs285198,-0.284  
20,68.504,rs6103442,-0.278  
20,68.524,rs861157,-0.266  
20,68.624,rs11086895,-0.300  
20,68.647,rs6124601,-0.304  
20,68.719,rs4812761,-0.310  
20,68.734,rs2143557,-0.305  
20,68.736,rs764673,-0.334  
20,68.770,rs4812772,-0.249  
20,68.776,rs6031256,-0.273  
20,68.826,rs6124611,-0.273  
20,68.927,rs6093921,-0.264  
20,68.992,rs1883680,-0.286  
20,69.026,rs6031367,-0.292  
20,69.167,rs2017246,-0.324  
20,69.241,rs738498,-0.319  
20,69.284,rs1971447,-0.287  
20,69.319,rs6130569,-0.282  
20,69.354,rs17755371,-0.279  
20,69.356,rs16985330,-0.278  
20,69.403,rs4812854,-0.308  
20,69.405,rs6031753,-0.306  
20,69.410,rs6130677,-0.299  
20,69.410,rs4812858,-0.297  
20,69.415,rs6017407,-0.278



20,69.423,rs6031782,-0.249  
20,69.427,rs1078342,-0.242  
20,69.455,rs6017430,-0.276  
20,69.474,rs2425672,-0.317  
20,69.491,rs1804644,-0.363  
20,69.493,rs2299971,-0.370  
20,69.512,rs1015519,-0.397  
20,69.530,rs6031957,-0.382  
20,69.577,rs12625505,-0.346  
20,69.598,rs6017525,-0.327  
20,69.608,rs8113868,-0.319  
20,69.622,rs2743312,-0.314  
20,69.636,rs1981431,-0.319  
20,69.663,rs4810449,-0.311  
20,69.670,rs6104159,-0.380  
20,69.896,rs2272955,-0.426  
20,69.960,rs6104239,-0.443  
20,69.972,rs6073789,-0.446  
20,70.364,rs1967656,-0.531  
20,70.514,rs1736493,-0.524  
20,70.594,rs16990934,-0.521  
20,70.677,rs7679,-0.518  
20,70.787,rs6104410,-0.525  
20,70.862,rs3933239,-0.525  
20,71.025,rs2297199,-0.528  
20,71.173,rs1535044,-0.529  
20,71.236,rs6074037,-0.530  
20,71.260,rs6074043,-0.534  
20,71.293,rs2425761,-0.541  
20,71.349,rs2868767,-0.561  
20,71.423,rs2050113,-0.579  
20,71.476,rs2868714,-0.558  
20,71.564,rs2425861,-0.510  
20,71.607,rs2180911,-0.506  
20,71.620,rs2425867,-0.501  
20,71.825,rs1011595,-0.482  
20,71.919,rs7266119,-0.498  
20,71.939,rs636493,-0.488  
20,71.958,rs3752261,-0.476  
20,71.974,rs6065998,-0.470  
20,72.087,rs6063003,-0.536  
20,72.147,rs2064342,-0.680  
20,72.180,rs10854172,-0.697  
20,72.242,rs2425882,-0.725  
20,72.316,rs13038390,-0.724  
20,72.591,rs16991859,-0.643  
20,72.624,rs3092651,-0.633  
20,72.694,rs3091621,-0.620  
20,72.744,rs3092379,-0.617  
20,72.905,rs2151389,-0.636  
20,73.148,rs6124883,-0.656  
20,73.205,rs6018168,-0.594  
20,73.229,rs1412955,-0.636  
20,73.374,rs11696413,-0.619  
20,73.395,rs1211644,-0.625  
20,73.443,rs6018223,-0.675  
20,73.447,rs3787265,-0.669  
20,73.481,rs6066179,-0.642  
20,73.483,rs4810599,-0.641  
20,73.485,rs11086190,-0.639  
20,73.540,rs3827060,-0.576

20,73.573,rs6063073,-0.586  
20,73.665,rs6090639,-0.620  
20,73.681,rs2235908,-0.661  
20,73.730,rs761021,-0.632  
20,73.839,rs7268399,-0.714  
20,73.840,rs6063100,-0.714  
20,74.025,rs12624409,-0.692  
20,74.069,rs2425938,-0.747  
20,74.104,rs4810643,-0.755  
20,74.337,rs1569438,-0.766  
20,74.652,rs1889177,-0.860  
20,74.659,rs6018639,-0.860  
20,74.697,rs12480922,-0.888  
20,74.719,rs4809645,-0.894  
20,74.736,rs6063140,-0.840  
20,74.763,rs4810669,-0.780  
20,74.826,rs914870,-0.688  
20,74.850,rs1930825,-0.637  
20,74.922,rs4810694,-0.633  
20,75.115,rs6094895,-0.654  
20,75.150,rs3092802,-0.621  
20,75.224,rs6018788,-0.629  
20,75.256,rs992585,-0.636  
20,75.321,rs6125184,-0.604  
20,75.323,rs4810736,-0.603  
20,75.392,rs6066574,-0.633  
20,75.646,rs6063208,-0.740  
20,75.750,rs645580,-0.692  
20,75.791,rs745086,-0.524  
20,75.949,rs2024594,-0.564  
20,76.361,rs3092791,-0.712  
20,76.838,rs7269408,-0.807  
20,76.852,rs3091796,-0.815  
20,76.907,rs926673,-0.852  
20,76.979,rs6095526,-0.855  
20,77.000,rs13044588,-0.852  
20,77.056,rs506958,-0.844  
20,77.079,rs5602,-0.843  
20,77.163,rs12625166,-0.814  
20,77.223,rs557446,-0.722  
20,77.243,rs544334,-0.715  
20,77.244,rs6019925,-0.716  
20,77.247,rs479180,-0.717  
20,77.259,rs6063413,-0.714  
20,77.357,rs4141587,-0.601  
20,77.373,rs6091023,-0.634  
20,77.562,rs12625137,-0.607  
20,77.597,rs6020041,-0.605  
20,77.612,rs618019,-0.581  
20,77.618,rs678634,-0.572  
20,77.764,rs652217,-0.622  
20,78.076,rs4811002,-0.693  
20,78.090,rs11697330,-0.676  
20,78.130,rs6020235,-0.605  
20,78.302,rs6012876,-0.530  
20,78.308,rs13045110,-0.526  
20,78.334,rs4811012,-0.514  
20,78.359,rs4809773,-0.510  
20,78.390,rs6067396,-0.474  
20,78.402,rs6020431,-0.459  
20,78.536,rs2002635,-0.427

20,78.644,rs16995208,-0.400  
20,78.744,rs2179605,-0.377  
20,78.854,rs6095962,-0.370  
20,79.043,rs932420,-0.357  
20,79.441,rs10485615,-0.371  
20,79.480,rs8122104,-0.372  
20,79.481,rs768175,-0.372  
20,79.759,rs12479559,-0.369  
20,79.954,rs6020717,-0.335  
20,80.107,rs6020732,-0.345  
20,80.133,rs6020739,-0.344  
20,80.771,rs6020871,-0.278  
20,80.786,rs1040771,-0.282  
20,80.794,rs6020905,-0.269  
20,80.808,rs1570009,-0.269  
20,80.850,rs736213,-0.196  
20,80.864,rs229998,-0.181  
20,80.875,rs6020997,-0.171  
20,80.892,rs16995777,-0.171  
20,80.916,rs1014756,-0.174  
20,80.935,rs1997815,-0.196  
20,80.944,rs1555147,-0.183  
20,80.983,rs6096361,-0.149  
20,81.000,rs4809830,-0.159  
20,81.003,rs761685,-0.159  
20,81.008,rs8117067,-0.158  
20,81.017,rs6067742,-0.156  
20,81.035,rs6063641,-0.152  
20,81.036,rs12480160,-0.152  
20,81.105,rs1569736,-0.140  
20,81.467,rs16996025,-0.074  
20,81.538,rs6021231,-0.079  
20,81.549,rs747063,-0.077  
20,81.586,rs6021264,-0.074  
20,81.600,rs8119787,-0.073  
20,81.609,rs6021275,-0.074  
20,81.629,rs6063670,-0.075  
20,81.655,rs6021297,-0.075  
20,81.659,rs761382,-0.075  
20,81.666,rs6021301,-0.077  
20,81.784,rs4811223,-0.097  
20,81.793,rs13042311,-0.099  
20,81.824,rs1475670,-0.103  
20,81.918,rs6021460,-0.139  
20,81.974,rs6068020,-0.177  
20,82.015,rs1883731,-0.189  
20,82.029,rs6096686,-0.192  
20,82.126,rs6021631,-0.248  
20,82.128,rs6021632,-0.247  
20,82.162,rs2426407,-0.197  
20,82.205,rs6021661,-0.220  
20,82.226,rs6068063,-0.234  
20,82.262,rs6013382,-0.285  
20,82.280,rs6021702,-0.313  
20,82.398,rs3787178,-0.277  
20,82.422,rs6021771,-0.268  
20,82.476,rs3761137,-0.262  
20,83.111,rs6068271,-0.284  
20,83.132,rs2689372,-0.287  
20,83.181,rs707544,-0.292  
20,83.203,rs6022039,-0.295

20,83.275,rs6022045,-0.303  
20,83.316,rs17204629,-0.309  
20,83.554,rs241795,-0.344  
20,84.014,rs4501008,-0.352  
20,84.111,rs6126673,-0.348  
20,84.264,rs6022157,-0.376  
20,84.267,rs6022158,-0.376  
20,84.344,rs6097170,-0.369  
20,84.445,rs6022207,-0.367  
20,84.452,rs2741369,-0.367  
20,84.459,rs6097189,-0.368  
20,84.510,rs17328948,-0.382  
20,84.582,rs2904295,-0.402  
20,84.658,rs1936962,-0.443  
20,84.731,rs8117683,-0.450  
20,84.835,rs1293412,-0.448  
20,84.927,rs1293387,-0.459  
20,84.941,rs6068477,-0.438  
20,84.976,rs2426460,-0.386  
20,85.049,rs6022333,-0.377  
20,85.073,rs12625311,-0.372  
20,85.156,rs916954,-0.356  
20,85.165,rs2426474,-0.357  
20,85.209,rs6091653,-0.353  
20,85.261,rs1877430,-0.316  
20,85.294,rs1543080,-0.305  
20,85.307,rs2668791,-0.303  
20,85.339,rs169271,-0.283  
20,85.352,rs200633,-0.285  
20,85.371,rs6097345,-0.290  
20,85.394,rs8120425,-0.283  
20,85.398,rs1355598,-0.282  
20,85.399,rs6097354,-0.253  
20,85.540,rs169269,-0.212  
20,85.587,rs16997981,-0.204  
20,85.594,rs2904359,-0.203  
20,85.653,rs156617,-0.198  
20,85.875,rs6022462,-0.193  
20,85.910,rs7360757,-0.214  
20,85.998,rs6068555,-0.205  
20,86.153,rs8117157,-0.209  
20,86.226,rs2766667,-0.219  
20,86.248,rs2766671,-0.219  
20,86.264,rs6063966,-0.217  
20,86.362,rs6068595,-0.212  
20,86.403,rs2041278,-0.209  
20,86.417,rs6068608,-0.232  
20,86.456,rs6097523,-0.200  
20,86.457,rs6068620,-0.199  
20,86.512,rs10854193,-0.180  
20,86.577,rs2041317,-0.142  
20,86.585,rs6126938,-0.138  
20,86.616,rs2058250,-0.142  
20,86.661,rs4811466,-0.149  
20,86.691,rs6022758,-0.169  
20,86.718,rs6097606,-0.169  
20,86.838,rs7267819,-0.157  
20,86.850,rs6097659,-0.163  
20,86.868,rs2904376,-0.170  
20,86.871,rs6022842,-0.169  
20,86.881,rs16998549,-0.135

20,86.899,rs6068723,-0.102  
20,86.903,rs6127015,-0.102  
20,86.939,rs1952,-0.099  
20,86.960,rs4809946,-0.097  
20,87.033,rs208381,-0.099  
20,87.148,rs290427,-0.103  
20,87.180,rs368195,-0.098  
20,87.198,rs6064045,-0.105  
20,87.230,rs8123293,-0.115  
20,87.236,rs158528,-0.115  
20,87.249,rs210069,-0.113  
20,87.347,rs4809958,-0.093  
20,87.354,rs4809959,-0.092  
20,87.450,rs51301,-0.088  
20,87.894,rs6014100,-0.051  
20,87.910,rs6068930,-0.062  
20,87.911,rs2842,-0.063  
20,87.941,rs6064102,-0.060  
20,87.949,rs2870343,-0.060  
20,88.110,rs6023587,-0.045  
20,88.173,rs157640,-0.030  
20,88.185,rs6023609,-0.029  
20,88.198,rs458332,-0.028  
20,88.542,rs172410,-0.009  
20,88.609,rs6023759,-0.009  
20,89.047,rs6064179,-0.005  
20,89.147,rs6127423,-0.002  
20,89.260,rs1887305,-0.002  
20,89.658,rs11086499,-0.000  
20,89.884,rs3852923,0.000  
20,89.896,rs13036829,0.000  
20,89.979,rs6098616,0.002  
20,90.043,rs16984758,0.005  
20,90.069,rs415502,0.007  
20,90.148,rs6024193,0.006  
20,90.255,rs629522,0.004  
20,90.288,rs6098668,0.004  
20,90.548,rs366496,0.014  
20,90.728,rs6014468,0.016  
20,90.776,rs726121,0.015  
20,90.927,rs4811626,0.011  
20,91.249,rs6069473,0.007  
20,91.330,rs4811645,0.007  
20,91.429,rs6069499,0.013  
20,91.444,rs1437213,0.014  
20,92.079,rs17351628,0.069  
20,92.088,rs6024655,0.069  
20,92.335,rs6069674,0.067  
20,92.739,rs6014711,0.080  
20,92.749,rs2180691,0.080  
20,92.754,rs1468055,0.066  
20,92.795,rs7806,0.073  
20,93.019,rs6069767,0.114  
20,93.061,rs6024941,0.121  
20,93.068,rs6092326,0.121  
20,93.107,rs2146912,0.124  
20,93.139,rs6024978,0.153  
20,93.167,rs1570532,0.146  
20,93.266,rs4811724,0.216  
20,93.270,rs6127813,0.220  
20,93.325,rs2426643,0.244

20,93.340,rs4810037,0.267  
20,93.382,rs6025140,0.280  
20,93.402,rs11906748,0.292  
20,93.434,rs1570182,0.316  
20,93.456,rs913664,0.313  
20,93.469,rs6025178,0.315  
20,93.479,rs6069900,0.318  
20,93.498,rs6069905,0.324  
20,93.514,rs12481021,0.321  
20,93.542,rs1467704,0.358  
20,93.566,rs7261954,0.408  
20,93.581,rs427034,0.434  
20,93.585,rs2249634,0.466  
20,93.661,rs6069935,0.544  
20,93.707,rs1276462,0.573  
20,93.745,rs6069957,0.593  
20,93.769,rs1276350,0.600  
20,93.849,rs1853053,0.622  
20,93.897,rs969997,0.634  
20,93.924,rs735588,0.642  
20,93.930,rs2180901,0.646  
20,93.967,rs17400154,0.665  
20,93.984,rs6014921,0.622  
20,93.996,rs6092424,0.628  
20,94.023,rs717908,0.640  
20,94.036,rs8115658,0.639  
20,94.081,rs11698307,0.636  
20,94.092,rs6123661,0.683  
20,94.108,rs6069995,0.681  
20,94.224,rs3787382,0.665  
20,94.415,rs182784,0.635  
20,94.746,rs6064535,0.578  
20,94.832,rs6014987,0.569  
20,94.856,rs6025543,0.570  
20,94.876,rs6092477,0.571  
20,94.923,rs1543434,0.557  
20,95.044,rs6128046,0.527  
20,95.044,rs6070117,0.527  
20,95.271,rs1328757,0.473  
20,95.278,rs1040566,0.474  
20,95.283,rs1804160,0.473  
20,95.284,rs2179706,0.473  
20,95.323,rs1546913,0.454  
20,95.350,rs4810086,0.425  
20,95.384,rs6015040,0.381  
20,95.393,rs6064572,0.344  
20,95.409,rs742724,0.289  
20,95.458,rs17499060,0.328  
20,95.467,rs4811895,0.339  
20,95.482,rs6128111,0.348  
20,95.540,rs927171,0.359  
20,95.592,rs157091,0.365  
20,95.603,rs6025720,0.373  
20,95.634,rs157106,0.391  
20,95.696,rs6092524,0.323  
20,95.746,rs1556178,0.295  
20,95.824,rs967990,0.279  
20,95.903,rs6099755,0.306  
20,95.960,rs6025794,0.326  
20,96.050,rs913891,0.331  
20,96.128,rs4811937,0.332

20,96.326,rs227233,0.346  
20,96.368,rs6015141,0.354  
20,96.463,rs408319,0.370  
20,96.522,rs380505,0.379  
20,96.574,rs4561716,0.376  
20,96.615,rs6123756,0.389  
20,96.696,rs6099874,0.386  
20,96.855,rs2151696,0.399  
20,96.968,rs7262054,0.424  
20,97.023,rs6015170,0.345  
20,97.124,rs915041,0.341  
20,97.455,rs6026069,0.278  
20,97.499,rs6128273,0.305  
20,97.712,rs873131,0.300  
20,97.758,rs6070379,0.301  
20,97.858,rs530445,0.309  
20,97.876,rs6128290,0.314  
20,97.876,rs6070385,0.314  
20,98.044,rs3787158,0.393  
20,98.047,rs3746406,0.394  
20,98.668,rs4812024,0.379  
20,98.810,rs435208,0.354  
20,98.989,rs6015366,0.351  
20,99.094,rs911303,0.331  
20,99.231,rs8125112,0.331  
20,99.287,rs6123836,0.330  
20,99.389,rs919197,0.370  
20,99.677,rs9760,0.373  
20,99.994,rs6070722,0.295  
20,100.016,rs13036348,0.293  
20,100.108,rs4812058,0.292  
20,100.278,rs260012,0.299  
20,100.368,rs7264385,0.295  
20,100.600,rs3026620,0.272  
20,100.634,rs11570248,0.274  
20,100.649,rs197173,0.275  
20,100.678,rs2268689,0.274  
20,100.686,rs2284804,0.274  
20,100.731,rs197175,0.274  
20,100.785,rs197180,0.275  
20,100.841,rs197813,0.294  
20,100.848,rs3026511,0.290  
20,100.882,rs6026837,0.269  
20,100.897,rs7267528,0.248  
20,100.912,rs906399,0.224  
20,100.994,rs6026872,0.198  
20,100.995,rs1041272,0.198  
20,101.039,rs6064780,0.191  
20,101.043,rs271982,0.193  
20,101.071,rs6064783,0.206  
20,101.073,rs271950,0.206  
20,101.109,rs271962,0.195  
20,101.132,rs271978,0.169  
20,101.134,rs6026890,0.169  
20,101.159,rs6026894,0.171  
20,101.185,rs11905457,0.174  
20,101.263,rs6026918,0.146  
20,101.272,rs275275,0.147  
20,101.347,rs11086671,0.142  
20,101.363,rs6026945,0.117  
20,101.368,rs3905228,0.118

20,101.423,rs6128620,0.130  
20,101.586,rs2426800,0.123  
20,101.588,rs6026986,0.123  
20,101.712,rs911148,0.131  
20,101.805,rs6070900,0.127  
20,101.959,rs816103,0.138  
20,101.991,rs6027060,0.174  
20,102.035,rs6027069,0.224  
20,102.063,rs1182475,0.235  
20,102.251,rs6027132,0.393  
20,102.260,rs6015584,0.395  
20,102.299,rs746219,0.398  
20,102.336,rs2296764,0.401  
20,102.841,rs8122451,0.397  
20,102.925,rs766712,0.395  
20,103.011,rs6071096,0.374  
20,103.014,rs242789,0.376  
20,103.088,rs6123968,0.434  
20,103.140,rs4812147,0.454  
20,103.152,rs12480283,0.454  
20,103.269,rs8124901,0.454  
20,103.401,rs6027379,0.431  
20,103.518,rs6092900,0.394  
20,103.524,rs560822,0.373  
20,103.538,rs486862,0.354  
20,104.047,rs354731,0.318  
20,104.062,rs6027564,0.323  
20,104.136,rs911167,0.341  
20,104.395,rs348780,0.348  
20,104.448,rs6071223,0.335  
20,104.514,rs6064938,0.320  
20,104.750,rs846201,0.289  
20,104.981,rs1201879,0.293  
20,105.061,rs4812180,0.290  
20,105.071,rs1201915,0.289  
20,105.234,rs1202043,0.302  
20,105.250,rs1202047,0.273  
20,105.262,rs1321704,0.271  
20,105.338,rs2426913,0.259  
20,105.349,rs2426919,0.257  
20,105.352,rs6027822,0.275  
20,105.353,rs1321715,0.281  
20,105.532,rs6101100,0.314  
20,105.541,rs4812219,0.330  
20,105.556,rs6128926,0.356  
20,105.564,rs7272074,0.341  
20,105.623,rs6027887,0.226  
20,105.645,rs13040718,0.233  
20,105.652,rs1033567,0.235  
20,105.688,rs10485472,0.241  
20,105.812,rs6128962,0.199  
20,105.877,rs6124039,0.200  
20,105.896,rs1015199,0.206  
20,105.913,rs6027933,0.204  
20,105.972,rs6101153,0.196  
20,105.973,rs4812248,0.176  
20,105.974,rs6065026,0.221  
20,106.077,rs1547018,0.282  
20,106.159,rs6027989,0.297  
20,106.177,rs6027995,0.339  
20,106.220,rs2865973,0.334



20,106.299,rs6071483,0.305  
20,106.394,rs2093140,0.304  
20,106.422,rs6071502,0.300  
20,106.431,rs10854214,0.283  
20,106.446,rs2281572,0.249  
20,106.605,rs817699,0.149  
20,106.643,rs2426972,0.133  
20,106.675,rs12185798,0.123  
20,106.885,rs6071562,0.092  
20,107.022,rs8118581,0.081  
20,107.031,rs2427077,0.080  
20,107.045,rs2427082,0.059  
20,107.093,rs6101320,0.053  
20,107.130,rs11908477,0.048  
20,107.266,rs4925258,0.014  
20,107.288,rs6061720,0.020  
20,107.331,rs1892318,0.020  
20,107.676,rs767725,0.002  
20,107.755,rs13045910,-0.000  
20,107.814,rs7343474,-0.001  
20,107.844,rs7263235,-0.001  
20,108.057,rs11204437,0.001  
20,108.080,rs6089452,0.000  
20,108.119,rs6061706,-0.001  
20,108.141,rs1122269,-0.001  
20,108.153,rs944259,0.000  
20,108.179,rs6142828,-0.000  
20,108.226,rs2026162,-0.000  
20,108.259,rs6061756,-0.003  
20,108.282,rs6061762,-0.004  
20,108.301,rs6089489,-0.004  
20,108.334,rs6061336,-0.004  
20,108.358,rs6121796,-0.001  
20,108.417,rs1888233,0.001  
20,108.424,rs6061348,0.002  
20,108.432,rs6061805,0.002  
20,108.493,rs884938,0.003  
20,108.530,rs16985602,0.003  
20,108.571,rs6061834,0.003  
20,108.601,rs1418796,0.003  
20,108.643,rs6121814,0.003  
20,108.748,rs6121817,0.001  
20,108.768,rs1557183,0.002  
20,108.779,rs2066422,0.002  
20,108.820,rs6089541,0.001  
20,108.850,rs6089291,0.000  
20,108.877,rs2427234,-0.000  
20,108.963,rs6142884,-0.005  
20,108.994,rs1891582,-0.004  
20,109.073,rs6061928,-0.002  
20,109.253,rs6142922,-0.002  
20,109.466,rs6142711,-0.010  
20,109.500,rs6142946,-0.011  
20,109.674,rs1407959,-0.014  
20,109.783,rs6062129,-0.017  
20,109.825,rs1739591,-0.018  
20,109.987,rs6143006,-0.022  
20,110.388,rs6061501,-0.035  
20,110.460,rs1570026,-0.036  
20,110.492,rs2236200,-0.037  
20,110.559,rs4925239,-0.038

20,110.661,rs7344065,-0.038  
20,110.799,rs6089232,-0.034  
20,111.064,rs6062234,-0.039  
20,111.447,rs6122080,-0.059  
20,111.494,rs6062771,-0.068  
20,111.532,rs6089848,-0.074  
20,111.556,rs6062847,-0.073  
20,111.648,rs6062957,-0.046  
20,111.676,rs11907898,-0.044  
20,111.732,rs3787524,-0.044  
20,111.763,rs2249938,-0.048  
20,111.825,rs856952,-0.059  
20,111.867,rs708627,-0.056  
20,111.872,rs4549158,-0.055  
20,111.879,rs6122279,-0.054  
20,111.941,rs2075776,-0.049  
20,112.142,rs747680,-0.040  
20,112.393,rs11086147,-0.035  
20,112.497,rs6090188,-0.046  
20,112.513,rs2427474,-0.049  
20,112.569,rs6011530,-0.063  
20,112.579,rs882683,-0.063  
20,112.602,rs6011534,-0.076  
20,112.773,rs6090223,-0.051  
20,112.794,rs6011600,-0.050  
20,112.853,rs6011613,-0.067  
20,112.875,rs6090243,-0.070  
20,112.940,rs6062412,-0.077  
20,113.005,rs6090265,-0.084  
20,113.025,rs6122383,-0.086  
20,113.040,rs2144456,-0.087  
20,113.374,rs720607,-0.120  
20,113.388,rs911064,-0.119  
20,113.464,rs6062879,-0.118  
20,113.685,rs755203,-0.121  
20,113.793,rs2038442,-0.121  
20,113.996,rs6122454,-0.145  
20,114.018,rs884851,-0.145  
20,114.049,rs310602,-0.143  
20,114.050,rs3787116,-0.143  
20,114.078,rs1757779,-0.141  
20,114.249,rs310654,-0.156  
20,114.559,rs879471,-0.174  
20,114.647,rs6011002,-0.173  
20,114.671,rs2297437,-0.173  
20,114.942,rs6089770,-0.152  
20,115.002,rs6122172,-0.149  
20,115.273,rs3795149,-0.135  
20,115.358,rs8567,-0.137  
20,115.529,rs2275293,-0.151  
20,115.650,rs817355,-0.136  
20,115.884,rs816953,-0.147  
20,115.961,rs6090041,-0.148  
20,116.014,rs2229205,-0.144  
20,116.120,rs530703,-0.133  
20,116.224,rs379042,-0.166  
20,116.288,rs2983452,-0.147  
20,116.352,rs6011342,-0.151  
20,116.404,rs2427616,-0.153  
20,116.428,rs2427621,-0.154  
20,116.506,rs6010742,-0.156

20,116.557,rs2427638,-0.156  
21,4.853,rs1296971,-0.038  
21,6.580,rs3115511,-0.035  
21,6.737,rs7276618,-0.035  
21,6.992,rs7278536,-0.038  
21,7.040,rs2822391,-0.029  
21,7.125,rs4539869,-0.034  
21,7.321,rs2192160,-0.046  
21,7.370,rs434396,-0.046  
21,7.419,rs2013669,-0.047  
21,7.431,rs4816274,-0.047  
21,7.543,rs2822589,-0.049  
21,7.641,rs2822654,-0.052  
21,7.758,rs2822670,-0.047  
21,7.792,rs723855,-0.045  
21,7.808,rs2822695,-0.045  
21,7.824,rs1735484,-0.046  
21,7.880,rs2822737,-0.066  
21,7.888,rs2822753,-0.066  
21,7.953,rs1882918,-0.068  
21,7.967,rs989938,-0.068  
21,7.981,rs2822786,-0.068  
21,7.981,rs2822787,-0.068  
21,7.989,rs7281036,-0.068  
21,7.998,rs459526,-0.068  
21,8.158,rs2125755,-0.068  
21,8.169,rs2822835,-0.068  
21,8.261,rs1292739,-0.076  
21,8.285,rs8132820,-0.090  
21,8.290,rs2822904,-0.091  
21,8.308,rs2403806,-0.096  
21,8.318,rs2822919,-0.163  
21,8.405,rs1569338,-0.147  
21,8.449,rs926130,-0.140  
21,8.477,rs2822964,-0.184  
21,8.485,rs2253406,-0.183  
21,8.506,rs13049690,-0.175  
21,8.513,rs4816416,-0.172  
21,8.547,rs2256417,-0.164  
21,8.556,rs2229741,-0.165  
21,8.987,rs2823025,-0.175  
21,9.032,rs2142219,-0.169  
21,9.045,rs2012931,-0.146  
21,9.136,rs2823036,-0.150  
21,9.162,rs975336,-0.171  
21,9.305,rs1556286,-0.140  
21,9.391,rs2823068,-0.135  
21,9.981,rs2823141,-0.094  
21,10.027,rs2823153,-0.096  
21,10.250,rs11700906,-0.108  
21,10.296,rs2823188,-0.111  
21,10.502,rs2823233,-0.117  
21,10.544,rs2823238,-0.102  
21,10.690,rs1736148,-0.130  
21,10.760,rs2823301,-0.226  
21,10.848,rs2179030,-0.264  
21,10.911,rs8127304,-0.254  
21,10.912,rs9974915,-0.254  
21,11.153,rs2823468,-0.243  
21,11.207,rs17275497,-0.238  
21,11.304,rs2404001,-0.225

21,11.457,rs370081,-0.196  
21,11.609,rs2823575,-0.220  
21,11.645,rs1034117,-0.230  
21,11.824,rs2823625,-0.257  
21,11.892,rs1689059,-0.254  
21,11.933,rs238993,-0.264  
21,12.006,rs239066,-0.278  
21,12.013,rs2823744,-0.308  
21,12.014,rs1449516,-0.314  
21,12.036,rs7278719,-0.343  
21,12.050,rs239070,-0.335  
21,12.101,rs240495,-0.351  
21,12.116,rs9983087,-0.358  
21,12.129,rs440294,-0.403  
21,12.150,rs1449522,-0.425  
21,12.243,rs2823809,-0.528  
21,12.254,rs2823815,-0.532  
21,12.257,rs2039241,-0.532  
21,12.463,rs7279730,-0.573  
21,12.535,rs2032287,-0.651  
21,12.558,rs9305777,-0.690  
21,12.600,rs7275493,-0.763  
21,12.600,rs6517708,-0.764  
21,12.624,rs2823984,-0.781  
21,12.663,rs2823997,-0.820  
21,12.736,rs10482884,-0.854  
21,12.812,rs2824065,-0.889  
21,12.853,rs2223074,-0.889  
21,13.084,rs2824135,-0.868  
21,13.263,rs1014604,-0.847  
21,13.433,rs2142266,-0.848  
21,13.681,rs7281703,-0.815  
21,13.702,rs2824226,-0.813  
21,13.717,rs2223079,-0.812  
21,13.980,rs2824245,-0.817  
21,14.188,rs17210792,-0.815  
21,14.357,rs169374,-0.819  
21,14.574,rs8133689,-0.787  
21,14.688,rs12627444,-0.791  
21,14.826,rs1784873,-0.794  
21,14.862,rs17692646,-0.794  
21,14.941,rs9637031,-0.775  
21,14.956,rs1493101,-0.771  
21,14.989,rs208926,-0.767  
21,15.071,rs6517774,-0.898  
21,15.079,rs2824312,-0.906  
21,15.082,rs2824314,-0.918  
21,15.085,rs2824315,-0.929  
21,15.114,rs2824321,-0.933  
21,15.190,rs2824327,-0.986  
21,15.576,rs17755917,-1.023  
21,15.582,rs2824376,-1.024  
21,15.763,rs2824416,-0.939  
21,15.809,rs728015,-0.953  
21,15.966,rs243570,-0.883  
21,16.007,rs171477,-0.825  
21,16.033,rs2257906,-0.788  
21,16.046,rs173390,-0.778  
21,16.088,rs10446073,-0.762  
21,16.145,rs2824512,-0.718  
21,16.216,rs2824534,-0.726

21,16.230,rs7282252,-0.719  
21,16.355,rs174742,-0.701  
21,16.441,rs1867704,-0.691  
21,16.494,rs2824607,-0.713  
21,16.549,rs150141,-0.728  
21,16.650,rs205667,-0.692  
21,16.654,rs2824640,-0.633  
21,16.668,rs2824646,-0.693  
21,16.739,rs2824700,-0.781  
21,16.746,rs2183557,-0.801  
21,16.764,rs7276198,-0.827  
21,16.859,rs9980111,-0.947  
21,16.868,rs997086,-0.957  
21,16.885,rs10482897,-0.963  
21,16.895,rs2406174,-0.964  
21,16.913,rs1041805,-1.092  
21,16.936,rs2824756,-1.102  
21,16.940,rs1475893,-1.096  
21,16.941,rs9978650,-1.045  
21,16.979,rs2824787,-1.083  
21,17.018,rs8132893,-1.075  
21,17.030,rs2824817,-1.072  
21,17.105,rs2824847,-1.054  
21,17.162,rs2824902,-1.050  
21,17.197,rs983475,-1.048  
21,17.205,rs2824909,-1.047  
21,17.354,rs9975541,-1.040  
21,17.358,rs7277618,-1.039  
21,17.389,rs2825011,-1.034  
21,17.434,rs2212784,-1.024  
21,17.466,rs2825077,-1.042  
21,17.510,rs2825131,-1.066  
21,17.545,rs2825180,-1.084  
21,17.586,rs7276040,-1.102  
21,17.728,rs460820,-1.150  
21,17.832,rs2825252,-1.228  
21,17.836,rs376691,-1.230  
21,17.930,rs421439,-1.249  
21,17.960,rs2825298,-1.371  
21,17.963,rs2103500,-1.319  
21,17.964,rs2825303,-1.310  
21,18.116,rs2226409,-1.344  
21,18.358,rs1015566,-1.284  
21,18.432,rs2211938,-1.272  
21,18.461,rs2825425,-1.283  
21,18.689,rs2825522,-1.365  
21,18.701,rs856171,-1.309  
21,18.707,rs2825523,-1.272  
21,18.876,rs2825560,-1.133  
21,19.121,rs1489734,-1.092  
21,19.177,rs654477,-1.093  
21,19.245,rs397535,-1.043  
21,19.285,rs2825644,-1.018  
21,19.331,rs2825663,-1.020  
21,19.346,rs2825665,-1.009  
21,19.417,rs2825682,-1.023  
21,19.436,rs9983963,-1.026  
21,19.501,rs2825714,-1.037  
21,19.504,rs17003202,-1.017  
21,19.552,rs2154621,-1.042  
21,19.650,rs218331,-0.968

21,19.734,rs8134910,-0.954  
21,19.914,rs2825810,-0.980  
21,19.932,rs2825824,-0.983  
21,20.478,rs2825968,-1.013  
21,20.492,rs11088773,-1.011  
21,20.862,rs9978170,-0.957  
21,20.898,rs2032203,-1.007  
21,20.919,rs2826182,-0.980  
21,20.937,rs1586488,-0.968  
21,20.959,rs2826225,-0.971  
21,20.967,rs874320,-0.932  
21,20.968,rs2019116,-0.928  
21,20.986,rs8133125,-0.789  
21,20.992,rs1735901,-0.762  
21,20.992,rs2989314,-0.776  
21,20.995,rs2826256,-0.825  
21,21.008,rs2826276,-0.735  
21,21.021,rs17199154,-0.642  
21,21.028,rs11911614,-0.602  
21,21.039,rs4629249,-0.620  
21,21.042,rs2826339,-0.618  
21,21.053,rs2826348,-0.611  
21,21.058,rs2000679,-0.609  
21,21.086,rs2826406,-0.669  
21,21.125,rs229431,-0.678  
21,21.155,rs229459,-0.683  
21,21.167,rs1482417,-0.687  
21,21.173,rs8127915,-0.687  
21,21.178,rs2826486,-0.648  
21,21.206,rs461016,-0.749  
21,21.234,rs2826520,-0.841  
21,21.258,rs2826546,-0.852  
21,21.284,rs2223728,-0.873  
21,21.304,rs1474757,-0.871  
21,21.338,rs2826612,-0.944  
21,21.358,rs2826626,-0.955  
21,21.362,rs7275484,-0.956  
21,21.378,rs6518017,-0.966  
21,21.379,rs8184921,-0.965  
21,21.418,rs8132873,-0.931  
21,21.444,rs7509909,-0.897  
21,21.462,rs2826662,-0.877  
21,21.470,rs2826672,-0.938  
21,21.505,rs2826721,-0.941  
21,21.685,rs2826842,-1.070  
21,21.708,rs1993668,-1.080  
21,21.732,rs233783,-1.058  
21,21.741,rs13049184,-1.049  
21,21.797,rs2739353,-0.997  
21,21.818,rs2522563,-0.982  
21,21.837,rs2223148,-0.970  
21,21.854,rs1980970,-0.960  
21,21.856,rs17554245,-0.959  
21,21.898,rs1735969,-0.934  
21,21.975,rs2776120,-1.014  
21,21.976,rs2254476,-1.015  
21,21.996,rs13053027,-1.019  
21,22.004,rs7283173,-1.018  
21,22.044,rs2827132,-0.893  
21,22.067,rs2211979,-0.863  
21,22.122,rs2154723,-0.792

21,22.136,rs1023361,-0.784  
21,22.185,rs6518127,-0.734  
21,22.416,rs2827246,-0.830  
21,22.472,rs2827260,-0.839  
21,22.647,rs2827303,-0.886  
21,22.678,rs2827315,-0.895  
21,22.783,rs2827417,-0.921  
21,22.844,rs2827434,-0.992  
21,23.042,rs2827541,-0.978  
21,23.132,rs2827563,-1.047  
21,23.207,rs2827633,-1.079  
21,23.240,rs915761,-1.069  
21,23.312,rs7280372,-1.111  
21,23.381,rs2827694,-1.156  
21,23.517,rs1475902,-1.245  
21,23.611,rs6518175,-1.267  
21,23.669,rs243276,-1.278  
21,24.067,rs2827806,-1.218  
21,24.071,rs198070,-1.218  
21,24.116,rs423334,-1.188  
21,24.172,rs12151983,-1.155  
21,24.172,rs2827841,-1.155  
21,24.379,rs1506007,-1.056  
21,24.398,rs1506011,-1.053  
21,24.495,rs2156384,-1.049  
21,24.527,rs984550,-1.053  
21,24.562,rs2828074,-1.071  
21,24.606,rs17004377,-1.107  
21,24.625,rs2828104,-1.122  
21,24.640,rs7278309,-1.131  
21,24.672,rs200700,-1.140  
21,24.707,rs2828176,-1.141  
21,24.756,rs2828209,-1.142  
21,24.779,rs2828219,-1.134  
21,24.794,rs2828242,-1.130  
21,24.830,rs2828264,-1.102  
21,24.901,rs1543117,-1.046  
21,24.914,rs7278243,-1.036  
21,24.956,rs2828420,-0.994  
21,24.965,rs1514414,-0.989  
21,25.004,rs2828457,-0.908  
21,25.017,rs2828476,-0.909  
21,25.040,rs2828500,-0.910  
21,25.098,rs176279,-0.919  
21,25.235,rs2828622,-0.871  
21,25.263,rs2828640,-0.870  
21,25.283,rs2828661,-0.872  
21,25.332,rs7276625,-0.869  
21,25.397,rs2828777,-0.821  
21,25.406,rs2828789,-0.813  
21,25.422,rs1910662,-0.798  
21,25.438,rs2040258,-0.759  
21,25.495,rs8130088,-0.663  
21,25.509,rs8133171,-0.632  
21,25.514,rs1475862,-0.627  
21,25.536,rs2829165,-0.605  
21,25.556,rs2829170,-0.594  
21,25.571,rs2829187,-0.581  
21,25.658,rs2250627,-0.468  
21,25.688,rs2829294,-0.424  
21,25.714,rs1009930,-0.436

21,25.786,rs1892732,-0.463  
21,25.797,rs4402842,-0.468  
21,26.016,rs2829505,-0.463  
21,26.222,rs928261,-0.448  
21,26.246,rs2829539,-0.447  
21,26.280,rs7277137,-0.447  
21,26.392,rs2026220,-0.458  
21,26.710,rs2829661,-0.493  
21,27.153,rs2829735,-0.483  
21,27.317,rs1893651,-0.472  
21,27.605,rs2829863,-0.456  
21,27.986,rs2829919,-0.449  
21,28.150,rs3787620,-0.439  
21,28.218,rs1783016,-0.436  
21,28.350,rs440666,-0.413  
21,28.372,rs216762,-0.409  
21,28.664,rs2830038,-0.375  
21,28.859,rs12482753,-0.362  
21,28.861,rs2830088,-0.362  
21,28.925,rs462281,-0.361  
21,29.037,rs463164,-0.358  
21,29.262,rs468345,-0.381  
21,29.419,rs2830177,-0.398  
21,29.471,rs219693,-0.384  
21,29.654,rs2830194,-0.475  
21,29.679,rs219616,-0.488  
21,29.683,rs219699,-0.495  
21,29.692,rs2830208,-0.512  
21,29.716,rs2830213,-0.503  
21,29.717,rs219701,-0.503  
21,29.729,rs219659,-0.494  
21,29.790,rs2830234,-0.503  
21,29.816,rs2830241,-0.514  
21,29.817,rs219648,-0.510  
21,29.834,rs2830252,-0.511  
21,29.873,rs191996,-0.541  
21,29.882,rs222972,-0.554  
21,29.888,rs7510108,-0.553  
21,29.893,rs222921,-0.553  
21,29.940,rs2830377,-0.502  
21,29.944,rs2212809,-0.498  
21,29.968,rs9967959,-0.534  
21,29.969,rs2187226,-0.531  
21,29.975,rs1893577,-0.494  
21,29.997,rs3017432,-0.513  
21,30.013,rs2830538,-0.532  
21,30.026,rs468969,-0.568  
21,30.028,rs7278460,-0.571  
21,30.037,rs12140,-0.586  
21,30.037,rs13615,-0.586  
21,30.041,rs370850,-0.587  
21,30.053,rs410349,-0.495  
21,30.078,rs162542,-0.544  
21,30.124,rs2830592,-0.565  
21,30.133,rs8128080,-0.546  
21,30.152,rs2830627,-0.556  
21,30.155,rs233609,-0.564  
21,30.163,rs1012766,-0.587  
21,30.190,rs2830663,-0.583  
21,30.211,rs2830701,-0.580  
21,30.218,rs2830713,-0.585



21,30.242,rs1351019,-0.595  
21,30.248,rs992499,-0.598  
21,30.258,rs2187230,-0.627  
21,30.266,rs11088023,-0.653  
21,30.279,rs2830786,-0.666  
21,30.288,rs2830790,-0.712  
21,30.303,rs2830811,-0.776  
21,30.314,rs237047,-0.839  
21,30.330,rs2830842,-0.854  
21,30.358,rs2830856,-0.871  
21,30.371,rs9977773,-0.845  
21,30.406,rs239656,-0.809  
21,30.425,rs239628,-0.798  
21,30.431,rs242326,-0.797  
21,30.432,rs2830956,-0.797  
21,30.439,rs242299,-0.791  
21,30.469,rs1981389,-0.739  
21,30.494,rs4817181,-0.691  
21,30.513,rs2831023,-0.656  
21,30.517,rs9975163,-0.652  
21,30.519,rs242341,-0.648  
21,30.568,rs2831057,-0.673  
21,30.617,rs2831145,-0.716  
21,30.669,rs181706,-0.746  
21,30.789,rs2831350,-0.704  
21,30.818,rs974607,-0.722  
21,30.819,rs2831449,-0.728  
21,30.829,rs2831475,-0.768  
21,30.830,rs16981703,-0.769  
21,30.850,rs2831511,-0.786  
21,30.875,rs2831547,-0.807  
21,30.895,rs2831615,-0.826  
21,30.989,rs8130371,-0.886  
21,31.025,rs2831744,-0.892  
21,31.069,rs2831805,-0.889  
21,31.192,rs9982652,-0.933  
21,31.239,rs2831913,-0.938  
21,31.250,rs2831927,-0.940  
21,31.279,rs981931,-0.939  
21,31.785,rs9982288,-0.996  
21,31.879,rs733610,-0.994  
21,31.927,rs1153285,-0.991  
21,32.177,rs2832329,-0.956  
21,32.348,rs2253438,-0.934  
21,32.509,rs2142160,-0.873  
21,32.568,rs16985084,-0.879  
21,32.570,rs464028,-0.880  
21,32.571,rs9983495,-0.948  
21,32.574,rs466013,-0.929  
21,32.636,rs9979883,-0.932  
21,32.668,rs466559,-0.935  
21,32.847,rs2832518,-0.953  
21,32.864,rs2832527,-0.964  
21,32.988,rs10432780,-1.057  
21,33.040,rs2832631,-1.186  
21,33.313,rs2832790,-1.408  
21,33.429,rs2832852,-1.371  
21,33.718,rs198921,-1.372  
21,34.029,rs2833114,-1.351  
21,34.036,rs2833117,-1.350  
21,34.055,rs2833124,-1.297

21,34.066,rs2833130,-1.266  
21,34.228,rs743323,-1.249  
21,34.285,rs2833161,-1.243  
21,34.298,rs16987408,-1.239  
21,34.509,rs2833188,-1.204  
21,34.676,rs1000927,-1.169  
21,34.764,rs1571691,-1.159  
21,34.928,rs2833282,-1.142  
21,34.986,rs2284472,-1.112  
21,35.014,rs2833306,-1.094  
21,35.017,rs723469,-1.091  
21,35.028,rs2248656,-1.091  
21,35.257,rs2300341,-1.070  
21,35.337,rs2253204,-1.044  
21,35.565,rs701724,-1.311  
21,35.704,rs581394,-1.360  
21,35.706,rs2284504,-1.364  
21,35.736,rs11909747,-1.414  
21,35.774,rs535985,-1.349  
21,35.814,rs2833401,-1.265  
21,35.845,rs2833406,-1.242  
21,35.864,rs558059,-1.162  
21,36.010,rs7282166,-1.137  
21,36.129,rs4817403,-1.180  
21,36.278,rs2409416,-1.171  
21,36.449,rs12626475,-1.282  
21,36.464,rs2833477,-1.280  
21,36.711,rs204750,-1.240  
21,36.741,rs2833505,-1.242  
21,36.800,rs2833524,-1.246  
21,36.801,rs1012482,-1.246  
21,36.970,rs2211783,-1.271  
21,37.023,rs2833550,-1.199  
21,37.032,rs11701165,-1.188  
21,37.046,rs9982597,-1.183  
21,37.130,rs2833565,-1.112  
21,37.165,rs2833577,-1.095  
21,37.169,rs2833579,-1.096  
21,37.284,rs3578,-0.966  
21,37.331,rs9305486,-1.027  
21,37.349,rs2833615,-1.045  
21,37.411,rs11911741,-1.042  
21,37.422,rs2833628,-1.039  
21,37.476,rs2833640,-1.002  
21,37.528,rs2833652,-0.966  
21,37.546,rs2833657,-0.961  
21,37.594,rs2833664,-0.943  
21,37.683,rs7275495,-0.938  
21,37.688,rs2051186,-0.929  
21,37.702,rs2833690,-0.934  
21,37.716,rs2833710,-0.953  
21,37.781,rs2833743,-0.952  
21,38.057,rs2833854,-0.941  
21,38.099,rs9979609,-0.948  
21,38.171,rs1782990,-0.943  
21,38.404,rs2833972,-0.893  
21,38.453,rs2833996,-0.890  
21,38.481,rs2834009,-0.889  
21,38.555,rs2834030,-0.923  
21,38.691,rs2834060,-0.938  
21,38.702,rs762236,-0.819

21,38.755,rs762178,-0.774  
21,38.772,rs7275842,-0.769  
21,38.878,rs7278735,-0.770  
21,38.990,rs2834090,-0.786  
21,39.008,rs8132749,-0.737  
21,39.025,rs2834092,-0.711  
21,39.056,rs1013059,-0.670  
21,39.083,rs2834109,-0.646  
21,39.156,rs8134313,-0.626  
21,39.251,rs2834147,-0.676  
21,39.265,rs2834153,-0.677  
21,39.346,rs2284550,-0.635  
21,39.352,rs2073362,-0.637  
21,39.406,rs2834167,-0.656  
21,39.483,rs1058867,-0.606  
21,39.504,rs8128184,-0.602  
21,39.640,rs1041868,-0.578  
21,39.750,rs9976971,-0.619  
21,39.862,rs1059293,-0.623  
21,40.920,rs1108000,-0.623  
21,40.933,rs2248321,-0.623  
21,40.969,rs2834278,-0.615  
21,41.000,rs9977155,-0.615  
21,41.103,rs2834291,-0.603  
21,41.259,rs2834305,-0.607  
21,41.332,rs2032314,-0.610  
21,41.373,rs2834332,-0.608  
21,41.506,rs2834368,-0.617  
21,41.780,rs8131205,-0.660  
21,41.841,rs873811,-0.657  
21,41.933,rs2010107,-0.664  
21,41.939,rs8134775,-0.711  
21,41.939,rs2834412,-0.711  
21,41.945,rs2834417,-0.713  
21,42.012,rs8128316,-0.681  
21,42.014,rs11702479,-0.663  
21,42.021,rs1010668,-0.659  
21,42.054,rs2834481,-0.627  
21,42.068,rs16991703,-0.618  
21,42.070,rs11088283,-0.617  
21,42.089,rs2211698,-0.600  
21,42.114,rs2243982,-0.574  
21,42.136,rs9636883,-0.514  
21,42.198,rs2834549,-0.496  
21,42.301,rs2834610,-0.528  
21,42.315,rs2834618,-0.499  
21,42.321,rs1981390,-0.486  
21,42.378,rs2249650,-0.470  
21,42.412,rs2284612,-0.525  
21,42.422,rs968625,-0.551  
21,42.434,rs2251826,-0.539  
21,42.437,rs2252175,-0.512  
21,42.457,rs2300401,-0.655  
21,42.480,rs8134179,-0.663  
21,42.480,rs2834669,-0.664  
21,42.493,rs2834675,-0.690  
21,42.509,rs7282762,-0.678  
21,42.541,rs11701555,-0.660  
21,42.555,rs1981392,-0.603  
21,42.571,rs11702779,-0.600  
21,42.581,rs2834725,-0.591

21,42.597,rs2242890,-0.578  
21,42.603,rs1883067,-0.570  
21,42.658,rs2834748,-0.474  
21,42.672,rs2834757,-0.470  
21,42.674,rs984659,-0.472  
21,42.715,rs17264072,-0.497  
21,42.772,rs7281587,-0.543  
21,42.850,rs2834874,-0.585  
21,42.885,rs2834889,-0.604  
21,43.046,rs2834930,-0.495  
21,43.099,rs2205109,-0.476  
21,43.176,rs2178832,-0.435  
21,43.270,rs2205112,-0.428  
21,43.361,rs2142100,-0.394  
21,43.386,rs1627997,-0.359  
21,43.992,rs16993569,-0.332  
21,44.001,rs2222956,-0.332  
21,44.523,rs752435,-0.254  
21,44.561,rs367467,-0.250  
21,44.619,rs2835165,-0.242  
21,44.912,rs2835270,-0.258  
21,44.948,rs2212922,-0.263  
21,44.974,rs13046990,-0.255  
21,44.990,rs2242816,-0.250  
21,45.042,rs3787732,-0.235  
21,45.071,rs3827183,-0.222  
21,45.075,rs11702555,-0.219  
21,45.080,rs2835333,-0.220  
21,45.114,rs12482030,-0.230  
21,45.149,rs218628,-0.222  
21,45.169,rs8596,-0.231  
21,45.217,rs170183,-0.282  
21,45.237,rs2000546,-0.212  
21,45.254,rs2835380,-0.203  
21,45.321,rs2835402,-0.180  
21,45.329,rs914147,-0.175  
21,45.339,rs928844,-0.172  
21,45.365,rs2250896,-0.160  
21,45.440,rs2252292,-0.122  
21,45.487,rs875224,-0.133  
21,45.623,rs2070650,-0.172  
21,45.640,rs2284985,-0.179  
21,45.752,rs2835450,-0.228  
21,45.863,rs2051397,-0.256  
21,45.947,rs2073418,-0.236  
21,46.075,rs3787750,-0.207  
21,46.357,rs743430,-0.185  
21,46.617,rs13050480,-0.185  
21,47.014,rs2073423,-0.179  
21,47.120,rs2835557,-0.177  
21,47.160,rs8132470,-0.164  
21,47.200,rs7281206,-0.132  
21,47.575,rs13052269,-0.155  
21,47.752,rs2835822,-0.165  
21,47.944,rs857984,-0.163  
21,48.049,rs858008,-0.161  
21,48.097,rs2835908,-0.160  
21,48.147,rs858027,-0.139  
21,48.220,rs860798,-0.141  
21,48.243,rs2835949,-0.145  
21,48.342,rs2835975,-0.167

21,48.378,rs2835991,-0.171  
21,48.426,rs2226358,-0.175  
21,48.456,rs7276928,-0.173  
21,48.473,rs2836025,-0.174  
21,48.522,rs928765,-0.177  
21,48.529,rs8129919,-0.199  
21,48.605,rs2836048,-0.202  
21,48.608,rs3787870,-0.196  
21,48.617,rs7275707,-0.180  
21,48.708,rs2073358,-0.190  
21,48.712,rs2836062,-0.191  
21,48.773,rs2836076,-0.189  
21,48.785,rs2836079,-0.191  
21,48.819,rs1029001,-0.152  
21,48.866,rs2836115,-0.149  
21,49.386,rs2836195,-0.115  
21,49.434,rs2836231,-0.114  
21,49.591,rs2230033,-0.107  
21,49.682,rs1007289,-0.126  
21,49.745,rs2836338,-0.123  
21,49.752,rs2836341,-0.129  
21,49.899,rs2836381,-0.144  
21,49.994,rs17230547,-0.124  
21,49.994,rs17230554,-0.124  
21,50.018,rs2836411,-0.117  
21,50.037,rs1008927,-0.114  
21,50.070,rs7278274,-0.110  
21,50.401,rs2836480,-0.050  
21,50.578,rs8130680,-0.027  
21,50.636,rs2073427,-0.039  
21,50.963,rs8130434,-0.049  
21,51.051,rs743446,-0.047  
21,51.100,rs2070528,-0.043  
21,51.214,rs2836643,-0.035  
21,51.242,rs2105658,-0.033  
21,51.325,rs2836656,-0.031  
21,51.357,rs2836667,-0.023  
21,51.906,rs992244,-0.004  
21,52.043,rs2836749,-0.003  
21,52.054,rs9680113,-0.002  
21,52.070,rs1888477,-0.001  
21,52.115,rs2836770,-0.004  
21,52.212,rs2836803,-0.013  
21,52.242,rs732340,-0.009  
21,52.257,rs2836816,-0.008  
21,52.290,rs2236436,-0.007  
21,52.306,rs2836835,-0.008  
21,52.306,rs4816609,-0.008  
21,52.312,rs2836837,-0.008  
21,52.362,rs2836850,-0.010  
21,52.507,rs2836878,-0.021  
21,52.579,rs437398,-0.029  
21,53.158,rs2070865,-0.060  
21,53.205,rs2836989,-0.062  
21,53.429,rs2049823,-0.074  
21,53.605,rs1522,-0.086  
21,53.651,rs1475594,-0.091  
21,53.806,rs8127751,-0.112  
21,53.849,rs673086,-0.116  
21,53.913,rs667432,-0.120  
21,53.922,rs634910,-0.122

21,53.992,rs4818064,-0.137  
21,54.026,rs4173,-0.144  
21,54.172,rs2837129,-0.152  
21,54.190,rs8127619,-0.141  
21,54.201,rs368269,-0.134  
21,54.639,rs386095,-0.163  
21,54.681,rs381716,-0.185  
21,54.767,rs2837269,-0.146  
21,54.768,rs17753847,-0.146  
21,54.827,rs6517577,-0.147  
21,54.832,rs2244189,-0.121  
21,54.844,rs2299776,-0.083  
21,54.855,rs9808736,-0.074  
21,54.904,rs2252046,-0.094  
21,54.928,rs2837304,-0.097  
21,54.941,rs1005412,-0.101  
21,54.944,rs9978224,-0.102  
21,55.013,rs2837324,-0.148  
21,55.018,rs2837326,-0.151  
21,55.030,rs4610145,-0.150  
21,55.035,rs1123923,-0.149  
21,55.105,rs6517581,-0.183  
21,55.160,rs2142090,-0.183  
21,55.219,rs760168,-0.192  
21,55.379,rs2249498,-0.213  
21,55.402,rs7277623,-0.211  
21,55.408,rs2837415,-0.211  
21,55.417,rs2837420,-0.210  
21,55.497,rs7276717,-0.178  
21,55.686,rs2837455,-0.168  
21,55.702,rs2837461,-0.162  
21,55.750,rs760172,-0.141  
21,55.777,rs2837478,-0.130  
21,55.949,rs11908752,-0.109  
21,56.167,rs2837553,-0.122  
21,56.181,rs2837554,-0.121  
21,56.219,rs2837569,-0.121  
21,56.244,rs1882760,-0.121  
21,56.304,rs2205081,-0.123  
21,56.660,rs1882757,-0.137  
21,56.691,rs12482021,-0.139  
21,56.714,rs4816682,-0.131  
21,56.728,rs9985057,-0.116  
21,56.785,rs2837628,-0.151  
21,56.785,rs7280016,-0.141  
21,56.786,rs2837629,-0.126  
21,56.792,rs2837631,-0.125  
21,56.830,rs2837637,-0.117  
21,57.193,rs16999939,-0.104  
21,57.211,rs2837693,-0.103  
21,57.245,rs2837695,-0.099  
21,57.385,rs8127599,-0.084  
21,57.409,rs2837716,-0.082  
21,57.614,rs7279213,-0.085  
21,57.645,rs1015993,-0.086  
21,57.750,rs2837766,-0.092  
21,57.804,rs2837773,-0.096  
21,57.897,rs4818163,-0.102  
21,58.390,rs736977,-0.148  
21,58.393,rs2837826,-0.148  
21,58.478,rs2837835,-0.165

21,58.498,rs2837838,-0.164  
21,58.530,rs11701426,-0.162  
21,58.563,rs2837852,-0.153  
21,58.592,rs980274,-0.147  
21,58.770,rs2837858,-0.111  
21,58.793,rs17000375,-0.110  
21,58.834,rs2837867,-0.107  
21,59.050,rs2837887,-0.104  
21,59.218,rs1467754,-0.105  
21,59.420,rs12626949,-0.121  
21,59.492,rs13052628,-0.121  
21,59.525,rs2011706,-0.121  
21,59.571,rs2837914,-0.122  
21,59.737,rs744549,-0.127  
21,59.833,rs8126990,-0.128  
21,60.047,rs2016240,-0.112  
21,60.108,rs734757,-0.110  
21,60.127,rs4818219,-0.102  
21,60.215,rs914185,-0.144  
21,60.283,rs7510366,-0.148  
21,60.302,rs9983496,-0.149  
21,60.347,rs7280770,-0.154  
21,60.454,rs3827211,-0.191  
21,60.536,rs7277420,-0.212  
21,60.603,rs3746889,-0.225  
21,60.627,rs2006737,-0.250  
21,60.633,rs2410416,-0.281  
21,60.870,rs2158354,-0.260  
21,61.048,rs379839,-0.257  
21,61.187,rs13048056,-0.244  
21,61.335,rs2838037,-0.231  
21,61.395,rs467798,-0.226  
21,61.504,rs2094881,-0.222  
21,61.529,rs2276205,-0.215  
21,61.584,rs3787950,-0.201  
21,61.603,rs3761373,-0.197  
21,61.630,rs395584,-0.197  
21,61.731,rs2838046,-0.204  
21,61.798,rs2838053,-0.216  
21,61.822,rs2838055,-0.221  
21,61.914,rs9982697,-0.257  
21,61.925,rs915867,-0.259  
21,62.245,rs9980286,-0.303  
21,62.334,rs7280734,-0.299  
21,62.364,rs2838077,-0.295  
21,62.415,rs2838083,-0.269  
21,62.427,rs2838086,-0.278  
21,62.468,rs2776348,-0.325  
21,62.484,rs3850712,-0.328  
21,62.501,rs2776365,-0.312  
21,62.507,rs4919954,-0.300  
21,62.514,rs7275945,-0.289  
21,62.563,rs9980272,-0.289  
21,62.584,rs10222189,-0.297  
21,62.593,rs3842986,-0.282  
21,62.663,rs6586235,-0.309  
21,62.666,rs3787954,-0.310  
21,62.784,rs8184900,-0.311  
21,62.801,rs4075970,-0.316  
21,62.910,rs11203189,-0.312  
21,62.946,rs4919983,-0.319

21,62.962,rs2839403,-0.348  
21,62.986,rs2839418,-0.360  
21,62.990,rs382736,-0.362  
21,63.004,rs13433498,-0.365  
21,63.012,rs455508,-0.365  
21,63.027,rs2839422,-0.369  
21,63.042,rs365163,-0.371  
21,63.064,rs8132865,-0.452  
21,63.082,rs7279279,-0.459  
21,63.083,rs9977045,-0.460  
21,63.128,rs915833,-0.467  
21,63.197,rs12482638,-0.465  
21,63.252,rs220207,-0.461  
21,63.261,rs2839440,-0.489  
21,63.265,rs11701948,-0.500  
21,63.273,rs220229,-0.501  
21,63.294,rs2839448,-0.522  
21,63.296,rs220245,-0.560  
21,63.300,rs150791,-0.495  
21,63.300,rs150792,-0.487  
21,63.334,rs220254,-0.415  
21,63.372,rs220281,-0.361  
21,63.390,rs2839462,-0.362  
21,63.421,rs8133193,-0.363  
21,63.457,rs220128,-0.365  
21,63.464,rs7282628,-0.365  
21,63.486,rs220155,-0.363  
21,63.487,rs13051533,-0.363  
21,63.508,rs220168,-0.366  
21,63.515,rs220178,-0.366  
21,63.526,rs7280633,-0.366  
21,63.574,rs220321,-0.364  
21,63.724,rs3787972,-0.369  
21,63.763,rs12329683,-0.373  
21,64.180,rs225385,-0.373  
21,64.251,rs3788007,-0.337  
21,64.251,rs15661,-0.306  
21,64.251,rs691567,-0.270  
21,64.252,rs692544,-0.269  
21,64.253,rs2839500,-0.297  
21,64.253,rs928302,-0.289  
21,64.253,rs11203200,-0.281  
21,64.253,rs3814903,-0.298  
21,64.253,rs11203203,-0.294  
21,64.254,rs2839519,-0.289  
21,64.254,rs4920106,-0.289  
21,64.254,rs4920107,-0.289  
21,64.254,rs17114976,-0.295  
21,64.255,rs2839538,-0.318  
21,64.256,rs6586325,-0.310  
21,64.256,rs1878069,-0.317  
21,64.257,rs17115227,-0.317  
21,64.257,rs375694,-0.317  
21,64.258,rs375886,-0.314  
21,64.260,rs2245730,-0.258  
21,64.277,rs8132186,-0.260  
21,64.340,rs6586343,-0.277  
21,64.388,rs2051402,-0.283  
21,64.413,rs756574,-0.274  
21,64.552,rs869725,-0.232  
21,64.947,rs4920004,-0.279



21,64.969,rs11911090,-0.280  
21,65.384,rs8130292,-0.288  
21,66.058,rs11701048,-0.272  
21,66.120,rs234783,-0.272  
21,66.135,rs3972,-0.271  
21,66.235,rs1888523,-0.246  
21,66.374,rs9975438,-0.264  
21,66.559,rs4920052,-0.293  
21,66.649,rs2839644,-0.231  
21,66.674,rs2839650,-0.212  
21,67.102,rs2838225,-0.181  
21,67.313,rs502993,-0.156  
21,67.361,rs2838257,-0.178  
21,67.413,rs86133,-0.163  
21,67.515,rs762395,-0.178  
21,67.542,rs2838281,-0.172  
21,67.566,rs681210,-0.165  
21,67.576,rs935798,-0.163  
21,67.637,rs9637161,-0.152  
21,67.765,rs2838298,-0.130  
21,67.789,rs762388,-0.135  
21,67.827,rs4818955,-0.131  
21,67.842,rs743452,-0.114  
21,67.860,rs476861,-0.135  
21,68.070,rs9975103,-0.154  
21,68.116,rs162382,-0.158  
21,69.122,rs2838340,-0.143  
21,69.133,rs17004598,-0.143  
21,69.939,rs9985006,-0.129  
21,70.330,rs4819338,-0.120  
21,70.562,rs13052002,-0.126  
21,70.665,rs2838447,-0.128  
21,70.832,rs13847,-0.139  
21,71.374,rs2242949,-0.110  
21,72.207,rs2026880,-0.059  
21,72.236,rs7354779,-0.060  
21,72.386,rs8130070,-0.066  
21,72.386,rs2850163,-0.066  
21,72.481,rs1800522,-0.071  
21,72.679,rs2236441,-0.067  
21,72.727,rs2838551,-0.069  
21,73.026,rs9974831,-0.066  
21,73.270,rs2838562,-0.093  
21,73.276,rs743491,-0.093  
21,73.702,rs8133141,-0.140  
21,73.740,rs233314,-0.140  
21,73.773,rs233322,-0.145  
21,73.855,rs2838591,-0.147  
21,74.066,rs377263,-0.170  
21,74.112,rs460380,-0.173  
21,74.413,rs2838622,-0.252  
21,74.600,rs1004686,-0.264  
21,74.704,rs235289,-0.276  
21,74.742,rs7278654,-0.277  
21,74.869,rs584681,-0.280  
21,74.887,rs4818972,-0.246  
21,75.032,rs2838684,-0.250  
21,75.269,rs235343,-0.253  
21,75.367,rs235310,-0.256  
21,75.643,rs2235133,-0.299  
21,75.688,rs2838734,-0.273

21,75.728,rs1474552,-0.306  
21,75.902,rs4818995,-0.370  
21,75.933,rs8134646,-0.383  
21,76.276,rs2838753,-0.464  
21,76.345,rs11088978,-0.474  
21,76.804,rs385674,-0.512  
21,76.875,rs3788164,-0.517  
21,77.249,rs2838813,-0.550  
21,77.347,rs1051385,-0.563  
21,77.377,rs17004757,-0.567  
21,77.547,rs2838859,-0.590  
21,77.736,rs2838869,-0.545  
21,77.838,rs9977697,-0.551  
21,77.849,rs13433469,-0.548  
21,77.870,rs4819063,-0.543  
21,77.925,rs2838875,-0.539  
21,78.136,rs7281481,-0.543  
21,78.264,rs2183589,-0.522  
21,78.314,rs2026886,-0.517  
21,78.398,rs2838923,-0.492  
21,78.660,rs2236459,-0.531  
21,78.701,rs2838942,-0.534  
21,78.815,rs7278425,-0.544  
21,78.978,rs1051266,-0.579  
21,79.107,rs944422,-0.590  
21,79.282,rs914238,-0.655  
21,79.863,rs17004797,-0.642  
21,80.473,rs2839010,-0.616  
21,80.473,rs2839011,-0.616  
21,80.838,rs8132054,-0.614  
21,81.176,rs2150458,-0.650  
21,81.502,rs1475888,-0.600  
21,81.535,rs4293630,-0.590  
21,81.703,rs9976319,-0.469  
21,81.734,rs9984052,-0.458  
21,81.758,rs9978582,-0.406  
21,81.859,rs4305353,-0.316  
21,82.085,rs2839117,-0.223  
21,82.128,rs1980983,-0.210  
21,82.198,rs4819208,-0.200  
21,82.552,rs2839155,-0.173  
21,82.627,rs16979001,-0.171  
21,84.199,rs2839307,-0.139  
21,84.580,rs9978658,-0.131  
21,84.702,rs2839367,-0.130  
21,84.820,rs2839376,-0.129  
21,84.882,rs15047,-0.130  
22,6.055,rs5747999,-0.264  
22,6.432,rs17433377,-0.268  
22,6.593,rs7291429,-0.270  
22,6.652,rs165611,-0.277  
22,6.850,rs7293026,-0.343  
22,6.871,rs5992587,-0.327  
22,6.925,rs1981707,-0.330  
22,6.943,rs2385786,-0.331  
22,7.018,rs4819934,-0.305  
22,7.073,rs7291404,-0.286  
22,7.079,rs5994129,-0.285  
22,7.161,rs2845394,-0.256  
22,7.284,rs6518660,-0.203  
22,7.297,rs9606615,-0.193

22,7.317,rs879577,-0.148  
22,7.353,rs5746996,-0.108  
22,7.372,rs5748883,-0.100  
22,7.393,rs5747007,-0.095  
22,7.419,rs1034859,-0.089  
22,7.427,rs5994180,-0.091  
22,7.487,rs1076102,-0.106  
22,7.514,rs2231495,-0.113  
22,7.534,rs5747018,-0.122  
22,7.545,rs1076105,-0.129  
22,7.603,rs5748965,-0.122  
22,7.634,rs4819979,-0.124  
22,7.635,rs5747035,-0.124  
22,7.645,rs1006015,-0.126  
22,7.661,rs8141904,-0.127  
22,7.672,rs9606669,-0.119  
22,7.752,rs5749011,-0.074  
22,7.811,rs9605252,-0.040  
22,7.836,rs9619055,-0.039  
22,7.871,rs5994271,-0.037  
22,7.903,rs4820001,-0.025  
22,7.908,rs2401081,-0.018  
22,7.913,rs2040692,-0.013  
22,7.967,rs9618000,-0.005  
22,7.986,rs9604738,-0.003  
22,7.988,rs7285871,-0.001  
22,8.057,rs5746366,0.002  
22,8.100,rs2518746,0.005  
22,8.106,rs1981533,0.007  
22,8.154,rs5746398,0.015  
22,8.220,rs2522297,0.019  
22,8.261,rs174289,0.023  
22,8.300,rs1296757,0.023  
22,8.403,rs113837,0.033  
22,8.407,rs174345,0.033  
22,8.415,rs174347,0.034  
22,8.442,rs2284827,0.035  
22,8.457,rs423158,0.037  
22,8.876,rs181396,0.053  
22,8.931,rs5747351,0.055  
22,8.954,rs738095,0.082  
22,8.960,rs366542,0.089  
22,8.971,rs5992103,0.093  
22,8.976,rs5992838,0.094  
22,9.034,rs390041,0.115  
22,9.061,rs2277831,0.113  
22,9.286,rs4819647,0.116  
22,9.342,rs4484121,0.117  
22,9.377,rs9618172,0.117  
22,9.539,rs450718,0.115  
22,9.542,rs452579,0.116  
22,9.619,rs462904,0.096  
22,9.636,rs458888,0.088  
22,9.666,rs5992985,0.089  
22,9.702,rs462055,0.083  
22,9.803,rs361540,0.065  
22,9.826,rs7286465,0.064  
22,9.898,rs2252257,0.063  
22,10.538,rs450046,0.108  
22,10.567,rs4819756,0.108  
22,10.575,rs759404,0.125

22,10.579,rs759406,0.133  
22,10.701,rs5747950,0.148  
22,10.721,rs2518805,0.150  
22,10.847,rs2072123,0.144  
22,11.111,rs4819778,0.133  
22,11.138,rs5993546,0.125  
22,11.175,rs2298271,0.120  
22,11.233,rs1061325,0.112  
22,11.612,rs2283650,0.120  
22,12.155,rs5748302,0.131  
22,12.241,rs5746800,0.132  
22,12.306,rs1476445,0.143  
22,12.361,rs1985884,0.158  
22,12.362,rs7291584,0.158  
22,12.400,rs5748391,0.157  
22,12.422,rs9605004,0.158  
22,12.448,rs1018851,0.160  
22,12.476,rs2097599,0.107  
22,12.543,rs4819835,0.113  
22,12.554,rs4819841,0.106  
22,12.572,rs2157731,0.097  
22,12.593,rs7291533,0.107  
22,12.685,rs5748427,0.117  
22,12.845,rs11704083,0.115  
22,12.926,rs2073750,0.114  
22,13.005,rs756661,0.118  
22,13.117,rs4680,0.126  
22,13.164,rs1990277,0.132  
22,13.478,rs1640299,0.155  
22,13.479,rs417309,0.155  
22,13.687,rs696884,0.151  
22,13.733,rs730669,0.145  
22,13.793,rs701431,0.150  
22,13.829,rs1567871,0.139  
22,13.919,rs854961,0.146  
22,13.939,rs741413,0.132  
22,13.991,rs2280117,0.131  
22,14.834,rs887021,0.112  
22,14.874,rs1005640,0.105  
22,14.977,rs7292126,0.102  
22,15.033,rs165626,0.106  
22,15.039,rs13433634,0.099  
22,15.044,rs1108101,0.095  
22,15.060,rs5759632,0.097  
22,15.062,rs16988632,0.097  
22,15.070,rs741193,0.099  
22,15.073,rs658793,0.088  
22,15.084,rs1076455,0.086  
22,15.285,rs165598,0.060  
22,15.383,rs756875,0.098  
22,15.387,rs178255,0.117  
22,15.396,rs178272,0.119  
22,15.399,rs7292968,0.129  
22,15.416,rs178297,0.152  
22,15.440,rs1548411,0.159  
22,15.450,rs5752500,0.153  
22,15.458,rs6005346,0.148  
22,15.471,rs442656,0.136  
22,15.532,rs421390,0.106  
22,15.570,rs1210606,0.104  
22,15.586,rs2541925,0.104

22,16.526,rs465500,0.055  
22,17.044,rs447001,0.037  
22,17.087,rs416661,0.036  
22,17.437,rs8141815,0.028  
22,17.780,rs238775,0.022  
22,17.799,rs6000509,0.025  
22,17.878,rs366116,0.041  
22,17.879,rs1372070,0.041  
22,17.894,rs1894239,0.044  
22,17.969,rs5750488,0.061  
22,17.969,rs16982689,0.061  
22,17.971,rs2329929,0.061  
22,17.979,rs5750496,0.048  
22,17.999,rs7286062,0.049  
22,18.108,rs5757080,0.053  
22,18.146,rs5757136,0.052  
22,18.235,rs4821846,0.053  
22,18.240,rs9623076,0.053  
22,18.292,rs8141482,0.056  
22,19.003,rs394409,0.057  
22,19.018,rs2188131,0.057  
22,19.019,rs469120,0.057  
22,19.153,rs9306383,0.073  
22,19.155,rs3788343,0.073  
22,19.182,rs16997431,0.073  
22,19.195,rs4820537,0.073  
22,19.637,rs5751614,0.081  
22,19.849,rs131677,0.068  
22,19.874,rs2239666,0.073  
22,19.932,rs131690,0.085  
22,20.172,rs8139654,0.078  
22,20.216,rs5759742,0.076  
22,20.258,rs5996528,0.076  
22,20.302,rs762260,0.077  
22,20.492,rs13056375,0.064  
22,20.496,rs6003692,0.064  
22,20.504,rs2330452,0.063  
22,20.835,rs4822416,0.072  
22,21.029,rs4822422,0.094  
22,21.129,rs9612370,0.086  
22,21.352,rs107017,0.042  
22,21.405,rs9624216,0.035  
22,21.422,rs131429,0.031  
22,21.467,rs17002697,0.031  
22,21.489,rs7288250,0.031  
22,21.583,rs17627963,0.032  
22,21.607,rs6003815,0.032  
22,22.089,rs6003849,0.062  
22,22.340,rs2070454,0.063  
22,22.425,rs2073391,0.063  
22,22.447,rs9612481,0.056  
22,22.470,rs738802,0.048  
22,22.491,rs2330625,0.042  
22,22.526,rs875643,0.031  
22,22.562,rs8138536,0.039  
22,22.571,rs4822461,0.039  
22,22.590,rs6004011,0.038  
22,22.997,rs2001106,0.024  
22,23.360,rs6004094,0.017  
22,23.508,rs2267073,0.013  
22,24.354,rs140335,0.006

22,24.369,rs8136239,0.007  
22,24.372,rs9704,0.008  
22,24.389,rs3827322,0.007  
22,24.542,rs5751901,0.006  
22,25.052,rs9612740,0.005  
22,25.142,rs131476,0.003  
22,25.481,rs139606,0.006  
22,25.618,rs5760687,0.013  
22,25.698,rs2877251,0.010  
22,25.848,rs11703103,0.009  
22,25.938,rs139724,0.010  
22,25.965,rs2877253,0.009  
22,25.967,rs5760712,0.009  
22,25.997,rs139735,0.006  
22,26.029,rs11914055,0.004  
22,26.206,rs5752024,0.003  
22,26.396,rs11090362,0.001  
22,26.431,rs5760779,0.001  
22,27.007,rs2294371,-0.000  
22,27.392,rs1547435,0.000  
22,27.430,rs5752079,0.000  
22,27.475,rs6004483,-0.000  
22,27.516,rs8136087,0.001  
22,27.533,rs8142586,0.001  
22,27.533,rs6004490,0.001  
22,27.616,rs4822591,0.000  
22,27.634,rs9612906,0.000  
22,27.858,rs5996898,0.001  
22,28.074,rs8139746,0.002  
22,28.191,rs133201,0.002  
22,28.915,rs641296,0.014  
22,29.008,rs12160908,0.029  
22,29.008,rs6004694,0.038  
22,29.131,rs5752185,0.036  
22,29.691,rs5752196,0.024  
22,29.985,rs133845,0.016  
22,29.991,rs4822644,0.016  
22,30.009,rs13054927,0.016  
22,30.112,rs133885,0.009  
22,30.144,rs133903,0.009  
22,30.208,rs8142661,0.009  
22,30.353,rs5761250,0.011  
22,30.365,rs5761251,0.011  
22,30.744,rs739281,0.017  
22,30.755,rs695317,0.021  
22,30.768,rs2157538,0.018  
22,30.943,rs5761308,0.009  
22,31.016,rs6004831,0.008  
22,31.088,rs10427777,0.006  
22,31.125,rs1013815,0.006  
22,31.156,rs3948759,0.006  
22,31.404,rs9306419,0.006  
22,31.567,rs4822679,0.003  
22,31.685,rs7288885,0.001  
22,31.734,rs5752254,0.002  
22,31.752,rs761670,0.003  
22,31.851,rs5997026,0.001  
22,31.957,rs9620587,0.000  
22,32.041,rs9613094,0.000  
22,32.091,rs12628683,-0.000  
22,32.334,rs134709,-0.008

22,32.408,rs5752275,-0.011  
22,32.444,rs6004968,-0.012  
22,32.482,rs137190,-0.019  
22,32.515,rs6519647,-0.013  
22,32.528,rs4822706,-0.011  
22,32.535,rs688700,-0.010  
22,32.546,rs655581,-0.012  
22,32.549,rs5997076,-0.014  
22,32.563,rs731276,-0.018  
22,32.568,rs16981987,-0.021  
22,32.582,rs5752318,-0.035  
22,32.582,rs8135154,-0.035  
22,32.582,rs9613168,-0.035  
22,32.594,rs761603,-0.031  
22,32.600,rs567600,-0.029  
22,32.689,rs134157,-0.040  
22,32.698,rs1011312,-0.041  
22,32.701,rs4149476,-0.041  
22,32.722,rs9613208,-0.044  
22,32.733,rs2267096,-0.052  
22,32.850,rs9613255,-0.043  
22,32.871,rs5761711,-0.050  
22,32.878,rs763105,-0.052  
22,32.888,rs5761729,-0.054  
22,32.898,rs1476035,-0.067  
22,32.907,rs5761744,-0.066  
22,32.920,rs4822791,-0.064  
22,32.927,rs7292381,-0.068  
22,32.932,rs9613266,-0.064  
22,32.937,rs1476033,-0.069  
22,32.941,rs2331331,-0.072  
22,32.941,rs2213707,-0.069  
22,32.955,rs5761777,-0.063  
22,32.961,rs17323675,-0.062  
22,32.963,rs136504,-0.061  
22,32.974,rs6005206,-0.056  
22,32.995,rs9608535,-0.046  
22,33.049,rs4822824,-0.061  
22,33.065,rs739259,-0.077  
22,33.080,rs16983313,-0.051  
22,33.086,rs2157465,-0.047  
22,33.095,rs16983365,-0.045  
22,33.102,rs2516083,-0.047  
22,33.110,rs5997154,-0.050  
22,33.116,rs4417,-0.056  
22,33.119,rs114559,-0.058  
22,33.130,rs79037,-0.067  
22,33.136,rs9613353,-0.067  
22,33.162,rs5761940,-0.067  
22,33.171,rs8138470,-0.089  
22,33.172,rs1883115,-0.081  
22,33.173,rs6519698,-0.075  
22,33.179,rs4820735,-0.077  
22,33.193,rs738164,-0.082  
22,33.208,rs134949,-0.070  
22,33.215,rs9608580,-0.068  
22,33.226,rs1028285,-0.057  
22,33.251,rs134164,-0.050  
22,33.261,rs2342401,-0.046  
22,33.289,rs9613403,-0.044  
22,33.296,rs497856,-0.051

22,33.306,rs9625188,-0.039  
22,33.311,rs552212,-0.028  
22,33.313,rs738488,-0.025  
22,33.318,rs134790,-0.021  
22,33.320,rs1076620,-0.020  
22,33.325,rs5762049,-0.020  
22,33.331,rs134794,-0.022  
22,33.333,rs874822,-0.022  
22,33.344,rs134815,-0.021  
22,33.369,rs543981,-0.012  
22,33.374,rs736950,-0.010  
22,33.381,rs2176659,-0.007  
22,33.409,rs2342936,-0.000  
22,33.420,rs8137706,0.000  
22,33.422,rs7288551,0.000  
22,33.436,rs16984491,-0.000  
22,33.437,rs6005420,-0.000  
22,33.439,rs5762120,-0.000  
22,33.442,rs136933,0.000  
22,33.447,rs136947,-0.000  
22,33.459,rs1159795,-0.000  
22,33.459,rs13055229,-0.000  
22,33.465,rs761592,-0.000  
22,33.469,rs6005433,0.001  
22,33.470,rs1884134,0.000  
22,33.472,rs999223,-0.000  
22,33.497,rs5762167,-0.003  
22,33.508,rs5762182,-0.003  
22,33.517,rs11913002,-0.003  
22,33.523,rs738570,-0.003  
22,33.537,rs11703864,-0.002  
22,33.539,rs2207362,-0.002  
22,33.547,rs1983659,-0.001  
22,33.553,rs926937,-0.002  
22,33.559,rs5752585,-0.002  
22,33.560,rs743262,-0.002  
22,33.577,rs960613,-0.000  
22,33.581,rs723184,-0.000  
22,33.586,rs5752592,-0.000  
22,33.588,rs4822915,-0.000  
22,33.612,rs5752597,0.000  
22,33.627,rs12160358,0.001  
22,33.634,rs133986,0.001  
22,33.644,rs738349,0.001  
22,33.649,rs16985255,0.002  
22,33.694,rs1885364,0.007  
22,33.701,rs4820774,0.007  
22,33.719,rs5997299,0.007  
22,33.723,rs134133,0.007  
22,33.724,rs738353,0.006  
22,33.734,rs6005605,0.007  
22,33.740,rs5762341,0.006  
22,33.747,rs2014274,0.005  
22,33.751,rs16985531,0.004  
22,33.761,rs392277,0.004  
22,33.768,rs2283847,0.003  
22,33.788,rs11704546,0.005  
22,34.257,rs134510,0.006  
22,34.301,rs6005779,0.006  
22,34.551,rs132549,0.008  
22,34.556,rs5752839,0.009



22,34.561,rs5762924,0.010  
22,34.570,rs4823002,0.010  
22,34.578,rs2294239,0.012  
22,34.580,rs9625679,0.012  
22,34.580,rs134558,0.012  
22,34.582,rs134592,0.013  
22,34.587,rs10483154,0.010  
22,34.591,rs12158320,0.009  
22,34.594,rs132274,0.007  
22,34.616,rs713886,0.001  
22,34.621,rs2744465,0.000  
22,34.650,rs174775,-0.000  
22,34.660,rs5763241,-0.000  
22,34.660,rs174719,-0.000  
22,34.672,rs5763284,-0.000  
22,34.675,rs737976,-0.000  
22,34.715,rs2530682,-0.000  
22,34.804,rs5753021,-0.000  
22,34.951,rs9608852,-0.003  
22,34.961,rs2078856,-0.003  
22,34.977,rs6006405,-0.003  
22,35.163,rs2097919,-0.003  
22,35.286,rs2074733,-0.003  
22,35.481,rs2299826,-0.002  
22,35.612,rs17659494,-0.002  
22,35.624,rs2066926,-0.002  
22,35.785,rs4820864,-0.002  
22,35.858,rs4149488,-0.002  
22,35.932,rs4820018,-0.002  
22,36.014,rs4820888,-0.002  
22,36.130,rs713853,-0.002  
22,36.251,rs136389,-0.001  
22,36.505,rs4444,-0.000  
22,36.635,rs5997787,-0.000  
22,36.638,rs8142410,-0.000  
22,36.818,rs2240182,-0.000  
22,36.911,rs4820932,-0.001  
22,36.934,rs2413016,-0.001  
22,36.973,rs5997872,-0.001  
22,37.007,rs3747152,-0.000  
22,37.035,rs4820944,-0.000  
22,37.445,rs6518752,0.000  
22,37.985,rs5753818,-0.000  
22,38.009,rs4820057,-0.000  
22,38.030,rs2267172,-0.000  
22,38.444,rs136429,-0.002  
22,38.550,rs2235168,-0.001  
22,38.583,rs5753950,-0.001  
22,38.588,rs1109611,-0.001  
22,38.598,rs7285170,-0.001  
22,38.628,rs4343557,-0.001  
22,38.659,rs2076037,0.000  
22,38.662,rs9619261,0.000  
22,38.713,rs9609551,0.001  
22,38.716,rs6518776,0.001  
22,38.718,rs2076054,0.001  
22,38.734,rs7289943,0.002  
22,38.740,rs12628404,0.002  
22,38.742,rs9609560,0.002  
22,38.759,rs7291067,0.005  
22,38.810,rs5754144,0.014

22,38.814,rs2710381,0.014  
22,38.815,rs2858344,0.020  
22,38.816,rs2157188,0.020  
22,38.823,rs743762,0.019  
22,38.835,rs1962222,0.018  
22,38.844,rs131048,0.020  
22,38.850,rs1009401,0.015  
22,38.857,rs2858729,0.010  
22,38.861,rs16990824,0.005  
22,38.862,rs7364201,0.004  
22,38.862,rs11704930,0.004  
22,38.872,rs2858226,0.008  
22,38.956,rs5998590,0.030  
22,38.963,rs756481,0.032  
22,38.967,rs11703257,0.033  
22,38.974,rs743742,0.036  
22,38.987,rs3788494,0.029  
22,39.001,rs5754245,0.036  
22,39.004,rs5754248,0.027  
22,39.041,rs135152,0.037  
22,39.114,rs4401302,0.064  
22,39.176,rs2413180,0.065  
22,39.333,rs724776,0.052  
22,39.423,rs9621704,0.064  
22,39.501,rs1076913,0.075  
22,39.516,rs9609813,0.077  
22,39.516,rs4239872,0.077  
22,39.541,rs1540299,0.087  
22,39.572,rs11703178,0.081  
22,39.670,rs743728,0.063  
22,39.693,rs9619358,0.056  
22,39.736,rs130423,0.042  
22,39.761,rs11913203,0.038  
22,39.831,rs738961,0.030  
22,39.879,rs5754630,0.032  
22,39.908,rs2267249,0.034  
22,39.914,rs4821173,0.034  
22,39.940,rs17806754,0.050  
22,39.969,rs2267268,0.060  
22,39.980,rs2267271,0.061  
22,39.989,rs239315,0.055  
22,40.010,rs9621764,0.042  
22,40.012,rs239330,0.042  
22,40.065,rs238865,0.044  
22,40.142,rs2267296,0.040  
22,40.153,rs3819670,0.039  
22,40.226,rs7290176,0.036  
22,40.248,rs738987,0.037  
22,40.324,rs130503,0.030  
22,40.383,rs5749706,0.019  
22,40.418,rs12167472,0.015  
22,40.436,rs5749711,0.015  
22,40.453,rs242885,0.016  
22,40.487,rs372499,0.018  
22,40.532,rs2213325,0.014  
22,40.592,rs130662,0.011  
22,40.721,rs130687,0.009  
22,40.950,rs169466,0.012  
22,41.079,rs5755023,0.013  
22,41.216,rs1034394,0.015  
22,41.270,rs8137002,0.017

22,41.657,rs743726,0.024  
22,42.037,rs2205810,0.032  
22,42.111,rs137260,0.022  
22,42.148,rs12159254,0.021  
22,42.166,rs7286893,0.020  
22,42.212,rs5750007,0.019  
22,42.216,rs1013513,0.017  
22,42.225,rs737821,0.014  
22,42.235,rs7284941,0.009  
22,42.247,rs2008519,0.005  
22,42.248,rs5750031,0.005  
22,42.264,rs5755543,0.005  
22,42.421,rs4821359,0.005  
22,42.499,rs7291929,0.005  
22,42.946,rs134220,0.004  
22,42.957,rs9306297,0.004  
22,43.685,rs2092331,0.005  
22,44.227,rs17793276,0.003  
22,44.242,rs5755703,0.003  
22,44.524,rs4645807,0.000  
22,44.529,rs133431,0.000  
22,44.578,rs5755730,0.000  
22,45.244,rs9610308,0.002  
22,45.249,rs139059,0.002  
22,45.254,rs1883299,0.003  
22,45.278,rs6518956,0.008  
22,45.313,rs4820201,0.006  
22,45.319,rs4820203,0.007  
22,45.320,rs5750120,0.007  
22,45.329,rs738370,0.007  
22,45.359,rs7293,0.010  
22,45.402,rs5755821,0.015  
22,45.451,rs135109,0.015  
22,45.514,rs9610342,0.031  
22,45.639,rs2051579,0.044  
22,45.885,rs1573708,0.035  
22,45.983,rs11089778,0.039  
22,45.995,rs4821456,0.040  
22,46.010,rs5756080,0.039  
22,46.057,rs132667,0.040  
22,46.085,rs2227167,0.043  
22,46.104,rs5995255,0.049  
22,46.142,rs136142,0.039  
22,46.167,rs136148,0.039  
22,46.174,rs713753,0.039  
22,46.199,rs735854,0.039  
22,46.224,rs2239787,0.041  
22,46.245,rs2239784,0.037  
22,46.246,rs1005570,0.037  
22,46.293,rs739097,0.036  
22,46.487,rs5756202,0.024  
22,46.519,rs5756219,0.024  
22,46.562,rs8140240,0.033  
22,46.587,rs5756233,0.039  
22,46.597,rs2049974,0.042  
22,46.633,rs1569488,0.051  
22,46.643,rs2050140,0.053  
22,46.669,rs2283985,0.071  
22,46.703,rs6000351,0.108  
22,46.718,rs5756268,0.119  
22,46.789,rs2746967,0.126

22,46.813,rs2284010,0.132  
22,46.866,rs715541,0.151  
22,46.899,rs1569784,0.156  
22,46.952,rs2009667,0.164  
22,46.999,rs2284022,0.193  
22,47.058,rs131833,0.200  
22,47.070,rs730483,0.164  
22,47.077,rs10854693,0.150  
22,47.088,rs746713,0.157  
22,47.115,rs6000464,0.149  
22,47.123,rs16997464,0.152  
22,47.176,rs4821567,0.164  
22,47.197,rs1534882,0.161  
22,47.206,rs131842,0.136  
22,47.237,rs13057045,0.133  
22,47.255,rs5995370,0.136  
22,47.318,rs5756477,0.150  
22,47.378,rs710183,0.169  
22,47.429,rs1421312,0.185  
22,47.447,rs228910,0.181  
22,47.468,rs228935,0.184  
22,47.492,rs2284033,0.152  
22,47.507,rs228979,0.129  
22,47.522,rs9622555,0.127  
22,47.531,rs5756531,0.108  
22,47.556,rs11913300,0.111  
22,47.557,rs229527,0.111  
22,47.577,rs16997918,0.106  
22,47.636,rs2213430,0.079  
22,47.670,rs6000645,0.071  
22,47.681,rs739036,0.066  
22,47.688,rs2267364,0.094  
22,47.691,rs1041894,0.094  
22,47.734,rs2284051,0.080  
22,47.742,rs1894599,0.061  
22,47.818,rs4821653,0.053  
22,47.833,rs11089838,0.056  
22,47.848,rs5750428,0.045  
22,47.916,rs2097454,0.050  
22,47.999,rs2235334,0.050  
22,48.040,rs7286335,0.045  
22,48.052,rs8137687,0.041  
22,48.076,rs2076087,0.034  
22,48.098,rs5750457,0.032  
22,48.099,rs12167035,0.032  
22,48.099,rs9917559,0.032  
22,48.143,rs761336,0.039  
22,48.149,rs4456799,0.039  
22,48.200,rs749326,0.042  
22,48.281,rs11089853,0.044  
22,48.785,rs2267366,0.008  
22,48.900,rs2267369,0.004  
22,48.985,rs7289126,0.001  
22,49.140,rs1997644,-0.002  
22,49.141,rs7289981,-0.003  
22,49.142,rs5750597,-0.007  
22,49.150,rs2267387,-0.012  
22,49.153,rs138407,-0.011  
22,49.153,rs2269609,-0.035  
22,49.159,rs16999046,-0.029  
22,49.176,rs2072797,-0.013

22,49.182,rs713863,-0.008  
22,49.187,rs735306,-0.003  
22,49.189,rs4361209,-0.002  
22,49.191,rs4820357,-0.003  
22,49.193,rs5757387,-0.002  
22,49.194,rs7293205,-0.002  
22,49.195,rs17298479,-0.001  
22,49.198,rs2142833,-0.001  
22,49.207,rs139275,-0.000  
22,49.209,rs139371,-0.000  
22,49.210,rs11089928,-0.000  
22,49.214,rs926544,-0.000  
22,49.214,rs17000830,-0.000  
22,49.214,rs12166894,0.000  
22,49.215,rs5750764,0.000  
22,49.216,rs6001491,0.000  
22,49.219,rs4821877,0.000  
22,49.222,rs1569496,0.002  
22,49.230,rs5757642,0.004  
22,49.240,rs1003538,0.002  
22,49.242,rs4821903,0.002  
22,49.254,rs713938,0.000  
22,49.259,rs5757777,0.000  
22,49.279,rs107140,0.000  
22,49.308,rs3021274,0.004  
22,49.370,rs5995814,0.005  
22,49.453,rs12484776,0.007  
22,49.503,rs11703324,0.007  
22,49.585,rs8135759,0.006  
22,49.625,rs6001954,0.006  
22,49.766,rs1884276,0.004  
22,49.813,rs5758093,0.003  
22,49.972,rs2076196,0.004  
22,50.209,rs9607821,0.006  
22,52.142,rs134871,-0.000  
22,52.633,rs17002948,-0.001  
22,52.667,rs1548304,-0.001  
22,53.496,rs4422240,-0.002  
22,53.688,rs11912260,-0.000  
22,53.864,rs4822134,0.000  
22,53.885,rs13057831,0.000  
22,53.925,rs5758756,0.000  
22,54.411,rs137139,0.006  
22,54.558,rs130334,0.010  
22,54.605,rs130370,0.012  
22,54.641,rs3788594,0.013  
22,54.828,rs4365558,0.018  
22,54.843,rs5758913,0.019  
22,54.895,rs2413716,0.020  
22,54.927,rs738532,0.020  
22,55.923,rs10427606,0.022  
22,55.924,rs5996262,0.022  
22,56.071,rs5759167,0.021  
22,56.106,rs738276,0.026  
22,56.182,rs2072852,0.021  
22,56.185,rs6003071,0.021  
22,56.224,rs5759197,0.017  
22,56.248,rs9333347,0.016  
22,56.253,rs80411,0.015  
22,56.386,rs5759219,0.005  
22,56.393,rs139004,0.004

22,56.402,rs916256,0.004  
22,56.410,rs9612028,0.004  
22,56.438,rs762957,0.005  
22,56.456,rs17516897,0.006  
22,56.469,rs737612,0.007  
22,56.482,rs139028,0.008  
22,56.529,rs6003130,0.007  
22,56.707,rs4820518,0.007  
22,56.818,rs5759291,0.005  
22,56.974,rs8136152,0.007  
22,57.190,rs2413761,0.008  
22,57.366,rs12168763,0.009  
22,58.724,rs138060,0.018  
22,58.769,rs5764359,0.018  
22,58.810,rs4823164,0.021  
22,58.832,rs2076213,0.021  
22,59.138,rs3177036,0.022  
22,59.469,rs6006611,0.020  
22,59.546,rs4823185,0.019  
22,59.608,rs9626091,0.021  
22,59.708,rs6006622,0.024  
22,59.819,rs2896022,0.018  
22,60.021,rs5764495,0.005  
22,60.176,rs2267604,0.004  
22,60.283,rs738482,0.004  
22,60.427,rs5764088,0.004  
22,60.427,rs12169088,0.004  
22,60.452,rs8140244,0.009  
22,60.465,rs9614325,0.009  
22,60.551,rs133909,0.011  
22,60.570,rs2267614,0.025  
22,60.603,rs5764558,0.041  
22,60.624,rs139069,0.042  
22,60.644,rs5764106,0.051  
22,60.652,rs139096,0.040  
22,60.676,rs2092351,0.036  
22,60.714,rs139142,0.032  
22,60.843,rs16991711,0.033  
22,60.849,rs9614403,0.033  
22,60.851,rs135444,0.034  
22,60.875,rs135437,0.032  
22,60.968,rs3935378,0.022  
22,60.998,rs6519840,0.032  
22,61.071,rs9626539,0.044  
22,61.090,rs5766069,0.049  
22,61.106,rs713724,0.050  
22,61.125,rs8138173,0.050  
22,61.127,rs1557553,0.051  
22,61.134,rs763041,0.055  
22,61.134,rs5764925,0.055  
22,61.185,rs135905,0.054  
22,61.251,rs135938,0.044  
22,61.290,rs135976,0.049  
22,61.420,rs6007154,0.056  
22,61.537,rs5764899,0.066  
22,61.569,rs2349623,0.063  
22,61.642,rs2349634,0.047  
22,61.656,rs138606,0.047  
22,61.670,rs16992538,0.039  
22,61.697,rs9306482,0.026  
22,61.715,rs738361,0.022

22,61.755,rs11913072,0.023  
22,61.865,rs6006845,0.018  
22,61.922,rs7292339,0.033  
22,61.937,rs9614882,0.038  
22,61.981,rs6007260,0.047  
22,61.988,rs739276,0.060  
22,62.000,rs734799,0.061  
22,62.021,rs132405,0.050  
22,62.086,rs132451,0.075  
22,62.097,rs739172,0.074  
22,62.115,rs132470,0.075  
22,62.147,rs9614932,0.080  
22,62.161,rs3788628,0.075  
22,62.186,rs1076933,0.080  
22,62.228,rs9614944,0.073  
22,62.251,rs9614576,0.070  
22,62.278,rs2285119,0.075  
22,62.290,rs2269539,0.078  
22,62.314,rs5766113,0.084  
22,62.331,rs8881,0.087  
22,62.378,rs762980,0.111  
22,62.435,rs5766175,0.117  
22,62.442,rs9614976,0.117  
22,62.626,rs16991948,0.082  
22,62.673,rs7287811,0.075  
22,62.689,rs1997890,0.073  
22,62.725,rs1005617,0.067  
22,62.742,rs132028,0.067  
22,62.773,rs5766358,0.077  
22,62.806,rs17628328,0.075  
22,62.808,rs12484773,0.074  
22,62.831,rs2057114,0.062  
22,62.903,rs9615022,0.072  
22,62.910,rs7284581,0.057  
22,62.910,rs6519913,0.058  
22,62.921,rs5766424,0.057  
22,63.037,rs9615049,0.052  
22,63.113,rs6007496,0.048  
22,63.129,rs2350623,0.048  
22,63.250,rs5766584,0.037  
22,63.321,rs58667,0.038  
22,63.541,rs719925,0.041  
22,63.749,rs1003505,0.027  
22,63.853,rs738223,0.021  
22,63.868,rs750449,0.016  
22,63.923,rs136723,0.010  
22,63.988,rs5764781,0.003  
22,64.005,rs7284208,0.003  
22,64.056,rs4415,0.008  
22,64.058,rs2071869,0.008  
22,64.084,rs5765512,0.008  
22,64.115,rs2071871,0.007  
22,64.616,rs3788677,0.003  
22,64.680,rs9614522,0.001  
22,64.681,rs713781,0.001  
22,64.682,rs9614790,0.001  
22,64.733,rs12167523,-0.000  
22,64.734,rs11704609,-0.000  
22,64.749,rs4823325,-0.000  
22,65.210,rs8137493,0.002  
22,65.311,rs9616111,0.011

22,65.353,rs11090911,0.013  
22,65.434,rs135557,0.016  
22,65.501,rs4253655,0.017  
22,65.521,rs1555208,0.018  
22,65.594,rs5766743,0.018  
22,66.128,rs6007903,0.018  
22,66.148,rs3788684,0.012  
22,66.193,rs8138156,0.005  
22,66.199,rs8139582,0.005  
22,66.245,rs1984519,0.003  
22,66.269,rs5767221,0.002  
22,66.315,rs3788723,0.000  
22,66.341,rs17589429,-0.000  
22,66.352,rs6008891,-0.000  
22,66.370,rs3788727,-0.002  
22,66.492,rs5768984,-0.005  
22,66.493,rs1079837,-0.005  
22,66.512,rs5769001,-0.005  
22,66.680,rs2748335,-0.003  
22,66.697,rs885792,-0.003  
22,66.772,rs135680,-0.003  
22,66.820,rs5769109,-0.001  
22,66.899,rs17221476,-0.000  
22,67.100,rs974226,0.000  
22,67.192,rs8136758,-0.000  
22,67.258,rs6009040,-0.000  
22,67.261,rs4823889,-0.000  
22,67.292,rs16995971,-0.000  
22,67.347,rs9616165,-0.000  
22,67.370,rs713783,-0.000  
22,67.438,rs4436,-0.000  
22,67.609,rs4476,0.000  
22,67.653,rs131930,0.001  
22,67.728,rs16996345,0.000  
22,67.894,rs4823473,-0.000  
22,67.933,rs17222768,0.000  
22,67.956,rs470039,0.000  
22,68.165,rs4823617,-0.000  
22,68.286,rs732275,-0.001  
22,68.349,rs5767645,-0.000  
22,68.385,rs766168,-0.000  
22,68.414,rs1005239,-0.000  
22,68.513,rs5767676,0.000  
22,68.974,rs6008205,0.002  
22,68.992,rs763031,0.005  
22,69.334,rs1297376,0.000  
22,69.435,rs130481,0.000  
22,69.510,rs6007694,0.002  
22,69.608,rs13056610,0.010  
22,69.645,rs1858754,0.011  
22,69.667,rs9615554,0.006  
22,70.176,rs6008349,0.005  
22,70.196,rs132192,0.005  
22,70.262,rs6007738,0.005  
22,70.398,rs738738,0.004  
22,70.478,rs932548,0.005  
22,70.536,rs2208123,0.005  
22,70.711,rs761917,0.001  
22,70.794,rs6008436,0.000  
22,70.805,rs5768108,0.001  
22,70.811,rs4823723,0.001



22,70.844,rs9615661,0.001  
22,70.860,rs738733,0.001  
22,70.951,rs874960,-0.000  
22,70.988,rs5768187,0.000  
22,71.050,rs738705,0.000  
22,71.140,rs13055322,-0.000  
22,71.206,rs9615717,-0.001  
22,71.323,rs5768273,-0.002  
22,71.496,rs117294,-0.000  
22,71.525,rs135272,-0.000  
22,71.567,rs9627236,-0.000  
22,71.608,rs6007798,-0.000  
22,71.638,rs135307,-0.001  
22,71.688,rs5768355,-0.001  
22,71.892,rs131147,0.000  
22,71.929,rs135618,0.001  
22,72.036,rs926233,0.004  
22,72.165,rs5768450,0.003  
22,72.270,rs4389,0.004  
22,72.285,rs742025,0.009  
22,72.293,rs1004689,0.008  
22,72.300,rs133576,0.003  
22,72.302,rs4823515,0.001  
22,72.336,rs133582,0.001  
22,72.370,rs6007822,0.002  
22,72.391,rs4394,0.001  
22,72.435,rs11702956,0.000  
22,72.491,rs4396,-0.000  
22,72.537,rs4400,0.001  
22,72.543,rs7287303,0.004  
22,72.555,rs133651,0.010  
22,72.564,rs11913704,0.008  
22,72.589,rs6519991,0.004  
22,72.699,rs2179060,0.006  
22,72.704,rs5768566,0.002  
22,72.752,rs97762,0.002  
22,72.954,rs11090839,0.010  
22,72.969,rs12106638,0.011  
22,72.983,rs7293013,0.012  
22,73.094,rs9615893,0.039  
22,73.142,rs9615901,0.027  
22,73.251,rs1894543,0.020  
22,73.274,rs16999282,0.019  
22,73.316,rs6007873,0.013  
22,73.359,rs16999308,0.013  
22,73.454,rs9615919,0.011  
22,73.467,rs16999372,0.010  
22,73.594,rs9615932,0.007  
22,73.895,rs8142256,0.050  
22,73.920,rs6010568,0.056  
22,73.935,rs8137195,0.059  
22,73.970,rs1028503,0.067  
22,74.017,rs5771716,0.059  
22,74.035,rs4925435,0.056  
22,74.158,rs738700,0.061  
22,74.316,rs16999845,0.075  
22,74.331,rs8140684,0.073  
22,74.401,rs6010527,0.075  
22,74.466,rs9617451,0.081  
22,74.478,rs5771851,0.083  
22,74.561,rs9628576,0.109

22,74.571,rs11204483,0.111  
22,74.606,rs9628580,0.120  
22,74.919,rs6009352,0.101  
22,74.962,rs1108604,0.094  
22,75.053,rs13058268,0.091  
22,75.165,rs4824067,0.074  
22,75.222,rs5769740,0.073  
22,75.323,rs2318432,0.079  
22,75.446,rs5769840,0.095  
22,75.560,rs9627832,0.107  
22,75.597,rs6009424,0.109  
22,75.752,rs135223,0.117  
22,75.815,rs135248,0.115  
22,75.832,rs6009503,0.114  
22,75.844,rs9616446,0.113  
22,75.941,rs5769440,0.082  
22,75.986,rs8141990,0.077  
22,76.070,rs2858579,0.087  
22,76.073,rs1005491,0.087  
22,76.257,rs2688143,0.047  
22,76.318,rs5770142,0.047  
22,76.348,rs2858649,0.053  
22,76.394,rs5769520,0.042  
22,76.439,rs2688098,0.030  
22,76.452,rs2858508,0.033  
22,76.491,rs7289034,0.028  
22,76.533,rs1124544,0.011  
22,76.542,rs739049,0.010  
22,76.580,rs848768,0.006  
22,76.671,rs708445,0.006  
22,76.711,rs17000838,0.005  
22,76.749,rs2269519,0.004  
22,76.813,rs1023453,0.003  
22,76.820,rs737356,0.003  
22,76.845,rs714007,0.003  
22,76.891,rs5770403,0.003  
22,76.900,rs4824032,0.002  
22,76.924,rs6009663,0.000  
22,76.958,rs5770418,0.000  
22,76.995,rs17826616,0.001  
22,77.011,rs5769644,0.001  
22,77.026,rs136790,-0.000  
22,77.035,rs136796,-0.000  
22,77.076,rs8138283,0.000  
22,77.101,rs714006,0.000  
22,77.230,rs5769676,0.000  
22,77.312,rs12168883,0.000  
22,77.358,rs2873932,0.001  
22,77.361,rs10854872,0.001  
22,77.421,rs134447,0.000  
22,77.422,rs728028,0.000  
22,77.423,rs8136975,0.002  
22,77.783,rs916362,0.006  
22,77.793,rs9616694,0.006  
22,77.892,rs5770619,0.006  
22,78.114,rs4824083,0.012  
22,78.184,rs6009845,0.019  
22,78.195,rs4823954,0.019  
22,78.683,rs761879,0.026  
22,79.551,rs137879,0.069  
22,79.576,rs137885,0.077

22,79.623,rs1079653,0.084  
22,79.692,rs7290681,0.101  
22,79.954,rs138229,0.099  
22,80.334,rs5771104,0.086  
22,80.390,rs730936,0.085  
22,81.018,rs12163408,0.117  
22,81.071,rs9628184,0.119  
22,81.156,rs7410465,0.120  
22,81.406,rs9616854,0.127  
22,81.451,rs4824157,0.165  
22,81.482,rs8138406,0.172  
22,81.696,rs6520149,0.124  
22,81.832,rs131750,0.105  
22,81.847,rs6010023,0.104  
22,82.024,rs9616802,0.091  
22,82.158,rs9616812,0.088  
22,82.325,rs2040487,0.073  
22,82.339,rs5770820,0.068  
22,82.390,rs715586,0.056  
22,82.440,rs3810648,0.056
